# Supplementary material
Source: PubMed Central journal article supplement (PMC2556807)
Supplement: pp.108.122457_6.pdf [file pp.108.122457_6.pdf]

## Supplemental Table II

### Number of up- and down-regulated genes in 16 stress conditions

|                | Type of stress | Number of up-regulated genes | Number of down-regulated genes |
|----------------|----------------|------------------------------|--------------------------------|
| Abiotic stress | Osmotic        | 3591                         | 4069                           |
|                | UV-B           | 3307                         | 3065                           |
|                | Wounding       | 1352                         | 584                            |
|                | Cold4C         | 3251                         | 3528                           |
|                | Heat           | 3814                         | 3415                           |
|                | Genotoxic      | 151                          | 42                             |
|                | Drought        | 366                          | 141                            |
|                | Salt           | 1888                         | 1905                           |
| Biotic stress  | avrRpm1        | 2241                         | 2240                           |
|                | DC3000         | 2825                         | 3092                           |
|                | Flg22          | 1141                         | 1068                           |
|                | GST-NPP1       | 887                          | 526                            |
|                | HrcC-          | 1290                         | 1034                           |
|                | HrpZ           | 1738                         | 1696                           |
|                | P.infestans    | 1952                         | 2402                           |
|                | Psph           | 1986                         | 2111                           |
