# Supplementary material
Source: PubMed Central journal article supplement (PMC2556807)
Supplement: pp.108.122457_7.pdf [file pp.108.122457_7.pdf]

**Supplemental Table III**

Genes in orthologous groups (A-M, A-R and A-P)  
Genes shown in a line belong to a OG in a particular type.

## A-P OGs in similarity approach

## ArabidopsisPoplar

AT5G10530.1,AT5G65600.1 Poptr1|554038  
AT3G51990.1 Poptr1|641296,Poptr1|650034  
AT2G46850.1 Poptr1|348177  
AT5G46570.1 Poptr1|580104  
AT5G41260.1 Poptr1|683685,Poptr1|693438  
AT4G00710.1 Poptr1|552160,Poptr1|731084  
AT4G27290.1  
Poptr1|97854,Poptr1|582053,Poptr1|582034,Poptr1|97851,Poptr1|97864,Poptr1|582044,Poptr1|699125,P  
optr1|569016,Poptr1|582049,Poptr1|582052,Poptr1|101581  
AT5G37790.1,AT1G66460.1 Poptr1|555947,Poptr1|692133  
AT3G51550.1 Poptr1|561003  
AT2G02800.1,AT1G14370.1 Poptr1|687114,Poptr1|345383  
AT5G57670.1 Poptr1|578641,Poptr1|585151  
AT3G58690.1 Poptr1|572853  
AT4G39110.1,AT2G21480.1 Poptr1|546679,Poptr1|557210  
AT4G20790.1 Poptr1|569329  
AT1G20650.1,AT1G76370.1 Poptr1|550762,Poptr1|73161  
AT5G42120.1 Poptr1|72567  
AT2G23770.1 Poptr1|655239,Poptr1|593989  
AT3G62220.1 Poptr1|700369,Poptr1|552601  
AT3G07070.1 Poptr1|553153  
AT5G24080.1 Poptr1|345693,Poptr1|580575  
AT5G16500.1,AT3G02810.1 Poptr1|588682  
AT1G07870.1,AT2G28590.1 Poptr1|706250,Poptr1|723362  
AT5G40380.1 Poptr1|691561  
AT1G51940.1 Poptr1|48907  
AT1G01540.2 Poptr1|700244  
AT3G08870.1,AT5G01560.1,AT5G01540.1,AT5G01550.1  
Poptr1|344319,Poptr1|106230,Poptr1|577036,Poptr1|577038  
AT4G00330.1 Poptr1|644485,Poptr1|731138  
AT5G55830.1 Poptr1|642314,Poptr1|55852  
AT3G15890.1,AT1G52540.1 Poptr1|548816,Poptr1|592708  
AT1G66920.1,AT1G66930.1,AT1G66910.1,AT1G67000.1,AT5G38260.1  
Poptr1|589687,Poptr1|589689,Poptr1|580819  
AT5G56460.1 Poptr1|555179,Poptr1|62672  
AT5G63940.1 Poptr1|685961,Poptr1|558448,Poptr1|692752,Poptr1|714592  
AT2G07180.1 Poptr1|584547,Poptr1|351717  
AT2G18890.1 Poptr1|96908,Poptr1|578584  
AT2G24370.1,AT4G31230.1 Poptr1|344214  
AT2G45910.1 Poptr1|711039,Poptr1|57030  
AT5G38560.1  
Poptr1|562124,Poptr1|52102,Poptr1|578989,Poptr1|546236,Poptr1|679010,Poptr1|569037,Poptr1|584555,  
Poptr1|49164,Poptr1|551298,Poptr1|572526,Poptr1|576114,Poptr1|562270,Poptr1|675118,Poptr1|555048,Poptr1|5918  
44,Poptr1|577579,Poptr1|556899,Poptr1|106362,Poptr1|58330,Poptr1|578993,Poptr1|585079,Poptr1|586309,Poptr1|7  
03279,Poptr1|594879,Poptr1|591415,Poptr1|97876,Poptr1|566043,Poptr1|576819,Poptr1|100266,Poptr1|562411,Pop  
tr1|560987,Poptr1|103406,Poptr1|551899,Poptr1|592330,Poptr1|549167,Poptr1|108273,Poptr1|563358,Poptr1|106693  
,Poptr1|592210,Poptr1|583873,Poptr1|581955,Poptr1|561040,Poptr1|548827,Poptr1|578194,Poptr1|670243,Poptr1|62  
898,Poptr1|589180,Poptr1|597582,Poptr1|570074,Poptr1|585088,Poptr1|662800,Poptr1|584554,Poptr1|550408,Poptr  
1|342368,Poptr1|589374,Poptr1|554855,Poptr1|718385,Poptr1|577520,Poptr1|107453,Poptr1|683813,Poptr1|647206,  
Poptr1|353576,Poptr1|596680,Poptr1|55474,Poptr1|668290,Poptr1|579127,Poptr1|653860,Poptr1|558028,Poptr1|555  
410,Poptr1|597493,Poptr1|55733,Poptr1|105293,Poptr1|555435,Poptr1|570903,Poptr1|351630,Poptr1|62795,Poptr1|5  
68346,Poptr1|345640,Poptr1|566579,Poptr1|562038,Poptr1|576723,Poptr1|571598,Poptr1|558030,Poptr1|545664,Pop  
ptr1|694110,Poptr1|571226,Poptr1|545294,Poptr1|544891,Poptr1|97856,Poptr1|579578,Poptr1|106626,Poptr1|544887  
,Poptr1|568224,Poptr1|106912,Poptr1|557261,Poptr1|569014,Poptr1|744623,Poptr1|572600,Poptr1|647811,Poptr1|56  
8364,Poptr1|562858,Poptr1|666165,Poptr1|580674,Poptr1|97984,Poptr1|672171,Poptr1|595391,Poptr1|568334,Poptr  
1|550085,Poptr1|660409,Poptr1|568356,Poptr1|584556,Poptr1|594874,Poptr1|582897,Poptr1|568228,Poptr1|577575,  
Poptr1|594872,Poptr1|554320,Poptr1|104309,Poptr1|562127,Poptr1|578983,Poptr1|555556,Poptr1|575188,Poptr1|70  
2960,Poptr1|343922,Poptr1|549474,Poptr1|55884,Poptr1|586812,Poptr1|587675,Poptr1|595005,Poptr1|595573,Poptr  
1|659779,Poptr1|693783,Poptr1|344449,Poptr1|565696,Poptr1|562039,Poptr1|347195,Poptr1|588611,Poptr1|681654,  
Poptr1|101345,Poptr1|748316,Poptr1|579629,Poptr1|345938,Poptr1|593663,Poptr1|595264,Poptr1|577421,Poptr1|55  
7003,Poptr1|571825,Poptr1|556456,Poptr1|546353,Poptr1|588615,Poptr1|563810,Poptr1|734399,Poptr1|738057,Poptr  
r1|678814,Poptr1|651093,Poptr1|104391,Poptr1|578994,Poptr1|558276,Poptr1|555421,Poptr1|663560,Poptr1|582054  
,Poptr1|656859,Poptr1|557031,Poptr1|552541,Poptr1|589288,Poptr1|588988,Poptr1|61045,Poptr1|658976,Poptr1|103  
169,Poptr1|558596,Poptr1|577176,Poptr1|75428,Poptr1|343964,Poptr1|352589,Poptr1|568339,Poptr1|584552,Poptr1|  
592515,Poptr1|105946,Poptr1|549459,Poptr1|677387,Poptr1|544938,Poptr1|354787,Poptr1|574604,Poptr1|566156,Pop  
ptr1|99464,Poptr1|579819,Poptr1|567635,Poptr1|545118,Poptr1|555408,Poptr1|354273,Poptr1|741188,Poptr1|56063  
4,Poptr1|568233,Poptr1|106033,Poptr1|571599,Poptr1|568338,Poptr1|705025,Poptr1|571616,Poptr1|734427,Poptr1|5  
4746,Poptr1|544909,Poptr1|351817,Poptr1|596679,Poptr1|589568,Poptr1|704436,Poptr1|572911,Poptr1|347712,Poptr  
r1|356219,Poptr1|566582,Poptr1|672184,Poptr1|747165,Poptr1|548061,Poptr1|597239,Poptr1|588617,Poptr1|560798  
,Poptr1|748508,Poptr1|597380,Poptr1|723122,Poptr1|586884,Poptr1|547713,Poptr1|673056,Poptr1|554919,Poptr1|34  
5804,Poptr1|585465,Poptr1|692986,Poptr1|578987,Poptr1|568368,Poptr1|100277,Poptr1|349843,Poptr1|101892,Poptr  
r1|592510,Poptr1|568235,Poptr1|102788,Poptr1|551896,Poptr1|353156,Poptr1|62827,Poptr1|555156,Poptr1|102791,  
Poptr1|563939,Poptr1|594873,Poptr1|105553,Poptr1|672172,Poptr1|65717,Poptr1|583688,Poptr1|585615,Poptr1|590  
369,Poptr1|715569,Poptr1|354024,Poptr1|544886,Poptr1|585676,Poptr1|545576,Poptr1|559856,Poptr1|568343,Poptr  
1|593690,Poptr1|705883,Poptr1|558035,Poptr1|568229,Poptr1|581280,Poptr1|583042,Poptr1|589427,Poptr1|568081,  
Poptr1|549137,Poptr1|592091,Poptr1|561881,Poptr1|72694,Poptr1|577277,Poptr1|55332,Poptr1|578887,Poptr1|5690

35,Poptr1|586813,Poptr1|106771,Poptr1|668291,Poptr1|658853,Poptr1|558819,Poptr1|695915,Poptr1|582026,Poptr1|549826,Poptr1|586549,Poptr1|591213,Poptr1|544885,Poptr1|589458,Poptr1|547696,Poptr1|592623,Poptr1|592740,Poptr1|569001,Poptr1|108496,Poptr1|65828,Poptr1|666524,Poptr1|575140,Poptr1|583015,Poptr1|694488,Poptr1|568344,Poptr1|574924,Poptr1|344892,Poptr1|76208,Poptr1|580017,Poptr1|556873,Poptr1|571609,Poptr1|562417,Poptr1|58229,Poptr1|547615,Poptr1|98370,Poptr1|678551,Poptr1|555154,Poptr1|657760,Poptr1|596863,Poptr1|544931,Poptr1|555153,Poptr1|686997,Poptr1|668292,Poptr1|578975,Poptr1|672561,Poptr1|559486,Poptr1|562355,Poptr1|737588,Poptr1|345132,Poptr1|548820,Poptr1|589645,Poptr1|701572,Poptr1|676675,Poptr1|589634,Poptr1|576755,Poptr1|594677,Poptr1|591399,Poptr1|101225,Poptr1|571604,Poptr1|702816,Poptr1|55789,Poptr1|579199,Poptr1|580279,Poptr1|544930,Poptr1|99341,Poptr1|567595,Poptr1|555425,Poptr1|681117,Poptr1|594717,Poptr1|352684,Poptr1|748283,Poptr1|555117,Poptr1|747510,Poptr1|48551,Poptr1|565694,Poptr1|659867,Poptr1|570820,Poptr1|565412,Poptr1|571227,Poptr1|345196,Poptr1|587847,Poptr1|563288,Poptr1|585244,Poptr1|547695,Poptr1|562416,Poptr1|574791,Poptr1|575932,Poptr1|552925,Poptr1|687503,Poptr1|353395,Poptr1|544944,Poptr1|59772,Poptr1|555318,Poptr1|574564,Poptr1|576843,Poptr1|56818,Poptr1|563357,Poptr1|674460,Poptr1|556715,Poptr1|741016,Poptr1|585115,Poptr1|575218,Poptr1|597379,Poptr1|747642,Poptr1|100074,Poptr1|579196,Poptr1|64252,Poptr1|596678,Poptr1|744629,Poptr1|586885,Poptr1|97846,Poptr1|75478,Poptr1|568350,Poptr1|568644,Poptr1|596011,Poptr1|591856,Poptr1|544902,Poptr1|580058,Poptr1|596814,Poptr1|556892,Poptr1|670217,Poptr1|552924,Poptr1|101716,Poptr1|568367,Poptr1|578966,Poptr1|668515,Poptr1|568232,Poptr1|349443,Poptr1|587668,Poptr1|61663,Poptr1|565460,Poptr1|559356,Poptr1|103221,Poptr1|544941,Poptr1|561902,Poptr1|679848,Poptr1|644969,Poptr1|357090,Poptr1|578974,Poptr1|584944,Poptr1|550090,Poptr1|591129,Poptr1|355555,Poptr1|99908,Poptr1|697739,Poptr1|586887,Poptr1|544921,Poptr1|558025,Poptr1|584073,Poptr1|710059,Poptr1|49039,Poptr1|588478,Poptr1|583677,Poptr1|568827,Poptr1|648205,Poptr1|595406,Poptr1|98974,Poptr1|107641,Poptr1|583716,Poptr1|560030,Poptr1|705613,Poptr1|568398,Poptr1|672635,Poptr1|561605,Poptr1|355242,Poptr1|555423,Poptr1|65716,Poptr1|355240,Poptr1|721062,Poptr1|593146,Poptr1|578990,Poptr1|580364,Poptr1|592622,Poptr1|705320,Poptr1|103383,Poptr1|547917,Poptr1|592131,Poptr1|650315,Poptr1|667125,Poptr1|582506,Poptr1|102380,Poptr1|574308,Poptr1|560578,Poptr1|585444,Poptr1|692395,Poptr1|648047,Poptr1|677416,Poptr1|596154,Poptr1|574925,Poptr1|103929,Poptr1|544906,Poptr1|571618,Poptr1|571054,Poptr1|645536,Poptr1|544884,Poptr1|568617,Poptr1|595081,Poptr1|589261,Poptr1|568649,Poptr1|558080,Poptr1|589264,Poptr1|589940,Poptr1|594877,Poptr1|582180,Poptr1|580912,Poptr1|591859,Poptr1|668293,Poptr1|678643,Poptr1|550520,Poptr1|568496,Poptr1|651183,Poptr1|697832,Poptr1|584268,Poptr1|76501,Poptr1|677386,Poptr1|560535,Poptr1|566581,Poptr1|733075,Poptr1|568366,Poptr1|569802,Poptr1|721159,Poptr1|558069,Poptr1|578785,Poptr1|345415,Poptr1|737306,Poptr1|656717,Poptr1|748365,Poptr1|590517,Poptr1|594480,Poptr1|729648,Poptr1|574562,Poptr1|49006,Poptr1|650982,Poptr1|558910,Poptr1|559408,Poptr1|668221,Poptr1|577774,Poptr1|586888,Poptr1|578985,Poptr1|591121,Poptr1|52270,Poptr1|713593,Poptr1|546517,Poptr1|671334,Poptr1|589691,Poptr1|99584,Poptr1|102309,Poptr1|592840,Poptr1|544798,Poptr1|589195,Poptr1|555632,Poptr1|72013,Poptr1|577778,Poptr1|62804,Poptr1|717916,Poptr1|565365,Poptr1|568999,Poptr1|644329,Poptr1|594076,Poptr1|695396,Poptr1|347193,Poptr1|574656,Poptr1|52255,Poptr1|658625,Poptr1|555383,Poptr1|729183,Poptr1|571840,Poptr1|60825,Poptr1|711481,Poptr1|558032,Poptr1|558034,Poptr1|571600,Poptr1|577161,Poptr1|595222,Poptr1|648834,Poptr1|104605,Poptr1|684169,Poptr1|555393,Poptr1|342291,Poptr1|732082,Poptr1|590226,Poptr1|555315,Poptr1|564909,Poptr1|103885,Poptr1|568226,Poptr1|597238,Poptr1|583687,Poptr1|75430,Poptr1|572994,Poptr1|646073,Poptr1|677145,Poptr1|560633,Poptr1|342127,Poptr1|653485,Poptr1|580756,Poptr1|710672,Poptr1|568773,Poptr1|564026,Poptr1|568638,Poptr1|583203,Poptr1|548696,Poptr1|574570,Poptr1|574310,Poptr1|662034,Poptr1|558909,Poptr1|586859,Poptr1|747795,Poptr1|554734,Poptr1|568958,Poptr1|568023,Poptr1|351826,Poptr1|547716,Poptr1|349397,Poptr1|545371,Poptr1|55607,Poptr1|544940,Poptr1|594474,Poptr1|690514,Poptr1|353363,Poptr1|589538,Poptr1|100644,Poptr1|586879,Poptr1|347194,Poptr1|101621,Poptr1|574387,Poptr1|747987,Poptr1|552921,Poptr1|647407,Poptr1|104677,Poptr1|597701,Poptr1|591736,Poptr1|596269,Poptr1|594131,Poptr1|72530,Poptr1|555411,Poptr1|102161,Poptr1|570549,Poptr1|547708,Poptr1|356327,Poptr1|679328,Poptr1|571157,Poptr1|556460,Poptr1|569000,Poptr1|596193,Poptr1|108001,Poptr1|590947,Poptr1|557096,Poptr1|592625,Poptr1|569021,Poptr1|574929,Poptr1|108383,Poptr1|667365,Poptr1|594868,Poptr1|555422,Poptr1|594880,Poptr1|663636,Poptr1|593792,Poptr1|692191,Poptr1|596054,Poptr1|545761,Poptr1|647558,Poptr1|668741,Poptr1|570143,Poptr1|103624,Poptr1|666163,Poptr1|578915,Poptr1|692799,Poptr1|582060,Poptr1|596012,Poptr1|658832,Poptr1|357023,Poptr1|559278,Poptr1|105790,Poptr1|720623,Poptr1|568244,Poptr1|678590,Poptr1|561079,Poptr1|672875,Poptr1|55424,Poptr1|344890,Poptr1|558027,Poptr1|567531,Poptr1|705174,Poptr1|101586,Poptr1|565194,Poptr1|661051,Poptr1|544880,Poptr1|585716,Poptr1|651121,Poptr1|706543,Poptr1|713598,Poptr1|588708,Poptr1|544802,Poptr1|596191,Poptr1|556874,Poptr1|580011,Poptr1|558033,Poptr1|550622,Poptr1|668295,Poptr1|550715,Poptr1|99249,Poptr1|583272,Poptr1|582061,Poptr1|647725,Poptr1|660232,Poptr1|61077,Poptr1|590141,Poptr1|677964,Poptr1|342140,Poptr1|581605,Poptr1|63014,Poptr1|592146,Poptr1|666858,Poptr1|562419,Poptr1|107033,Poptr1|98518,Poptr1|544882,Poptr1|702845,Poptr1|588618,Poptr1|544892,Poptr1|727616,Poptr1|554145,Poptr1|580874,Poptr1|594881,Poptr1|655551,Poptr1|578582,Poptr1|595939,Poptr1|672556,Poptr1|580022,Poptr1|649575,Poptr1|348885,Poptr1|678820,Poptr1|544901,Poptr1|549179,Poptr1|748131,Poptr1|579725,Poptr1|103598,Poptr1|718169,Poptr1|589640,Poptr1|572780,Poptr1|571438,Poptr1|57409,Poptr1|710730,Poptr1|575732,Poptr1|597556,Poptr1|551486,Poptr1|568992,Poptr1|568394,Poptr1|568667,Poptr1|583839,Poptr1|558458,Poptr1|546623,Poptr1|713781,Poptr1|578979,Poptr1|596716,Poptr1|585946,Poptr1|556900,Poptr1|674509,Poptr1|562238,AT4G25390.1,AT5G51770.1,Poptr1|342713,Poptr1|575727,Poptr1|356330,Poptr1|56984AT5G35380.1,AT4G331170.1,AT1G10620.1,AT1G11340.1,AT5G60080.1,AT3G53810.1,AT1G70450.1,AT2G29220.1,AT4G31110.1,AT1G23540.1,AT5G26150.1,AT1G61390.1,AT2G25220.1,AT3G52530.1,AT1G29720.1,AT3G59830.1,AT1G67470.1,AT5G66790.1,AT5G60320.1,AT1G61380.1,AT2G39360.1,AT1G61400.1,AT4G05200.1,AT1G74490.1,AT2G30940.2,AT3G01300.1,AT1G21245.1,AT3G50730.1,AT4G23310.1,AT2G07020.1,AT1G22720.1,AT1G21210.1,AT1G01740.1,AT2G17220.1,AT1G65250.1,AT5G12000.1,AT4G23250.1,AT5G39000.1,AT3G45420.1,AT4G23160.1,AT1G61500.1,AT3G63260.1,AT2G29250.1,AT3G06640.1,AT1G67890.1,AT3G59700.1,AT4G23300.1,AT1G06700.1,AT3G5770.1,AT3G53380.1,AT1G11300.1,AT4G11460.1,AT4G11490.1,AT5G11400.1,AT2G43690.1,AT3G46410.1,AT1G25390.1,AT1G16110.1,AT5G61550.1,AT1G78940.1,AT4G04540.1,AT5G51270.1,AT4G00970.1,AT5G58950.1,AT3G57120.1,AT3G57710.1,AT1G08720.1,AT1G51620.1,AT1G07570.1,AT2G16750.1,AT1G16140.1,AT3G04690.1,AT2G47060.4,AT3G24550.1,AT3G20530.1,AT3G24540.1,AT1G69790.1,AT1G48210.1,AT5G11020.1,AT3G22750.1,AT2G33580.1,AT4G3190.1,AT2G39180.1,AT4G11890.3,AT5G23170.1,AT5G18610.1,AT3G59350.1,AT2G39110.1,AT5G38990.1,AT1G77280.1,AT1G11410.1,AT4G38470.1,AT1G21240.1,AT1G48220.1,AT1G76360.1,AT5G59260.1,AT3G17420.1,AT3G57720.1,AT4G21230.1,AT5G56890.1,AT4G32000.1,AT5G60900.1,AT5G35370.1,AT4G28670.1,AT4G23280.1,AT3G09010.1,AT4G14780.1,AT2G23200.1,AT2G41890.1,AT4G02630.1,AT3G57750.1,AT2G40270.1,AT4G21380.1,AT2G20300.1,AT1G70250.1,AT5G47850.1,AT1G18390.1,AT1G70460.1,AT1G61440.1,AT5G38210.1,AT1G67520.1,AT5G11850.1,AT1G16160.1,AT4G11480.1,AT1G65800.1,AT4G23140.2,AT3G13690.1,AT1G61490.1,AT4G23150.1,AT5G54380.1,AT4G34500.1,AT3G46760.1,AT1G11050.1,AT4G21370.1,AT1G21590.1,AT3G28690.2,AT2G43850.1,AT4G35600.1,AT3G09830.1,AT3G45430.1,AT1G14000.1,AT1G26150.1,AT5G60090.1,AT2G17700.1,AT5G50180.1,AT1G61550.1,AT1G54820.1,AT1G62400.1,AT2G48010.1,AT4G28350.1,AT3G57700.1,AT2G39660.1,AT4G35230.1,AT5G60280.1,AT2G510520.1,AT5G50000.1,AT5G59700.1,AT3G59420.1,AT2G18470.1,AT5G58940.1,AT4G11530.1,AT3G57740.1,AT2G43230.1,AT1G33260.1,AT2G05940.1,AT5G28680.1,AT1G11330.1,AT5G38250.1,AT5G42440.1,AT3G26700.1,AT2G

37710.1,AT1G69730.1,AT3G45920.1,AT5G22050.2,AT1G21270.1,AT5G02070.1,AT4G23240.1,AT1G16760.1,AT1G61480.1,AT1G21230.1,AT3G45440.1,AT5G56790.1,AT5G15730.1,AT5G66710.1,AT5G35580.1,AT1G56720.1,AT1G16260.1,AT5G49470.2,AT3G55450.1,AT3G24790.1,AT4G03230.1,AT5G01060.1,AT2G41970.1,AT5G39020.1,AT1G72540.1,AT2G42960.1,AT5G24010.1,AT2G11520.1,AT1G65190.1,AT3G25490.1,AT5G02290.1,AT5G59010.1,AT3G49060.1,AT3G18810.1,AT4G35030.1,AT1G15530.1,AT1G30570.1,AT3G59750.1,AT3G21630.1,AT3G05140.1,AT1G665790.1,AT1G63500.1,AT5G02800.1,AT3G57730.1,AT5G57035.1,AT1G09440.1,AT1G61420.1,AT4G04570.1,AT1G55200.1,AT2G19130.1,AT3G09780.1,AT1G17540.1,AT3G54030.1,AT1G79680.1,AT1G66880.1,AT5G03320.1,AT4G04960.1,AT1G70130.1,AT1G19390.1,AT1G70520.1,AT4G02010.1,AT3G46290.1,AT3G59730.1,AT3G55950.1,AT1G61610.1,AT3G09240.1,AT5G18500.1,AT2G23450.1,AT4G04510.1,AT2G26290.1,AT5G60270.1,AT3G19300.1,AT1G72760.1,AT5G38240.1,AT2G30730.1,AT3G01840.1,AT1G17910.1,AT1G16120.1,AT3G21450.1,AT4G00960.1,AT2G17090.1,AT1G61860.1,AT2G24360.1,AT3G58760.1,AT1G26970.1,AT1G61590.1,AT3G55550.1,AT5G18910.1,AT4G04500.1,AT5G40540.1,AT3G50720.1,AT1G16150.1,AT1G61370.1,AT3G46930.1,AT5G20050.1,AT1G73660.1,AT3G16030.1,AT4G35780.1,AT3G53840.1,AT5G65500.1,AT4G18950.1,AT1G70740.1,AT3G26940.1,AT3G20200.1,AT1G79670.1,AT4G04490.1,AT1G16670.1,AT1G50990.1,AT5G13160.1,AT4G23220.1,AT5G60310.1,AT3G45330.1,AT5G65530.1,AT5G25440.1,AT4G02410.1,AT4G23320.1,AT5G61560.1,AT4G38830.1,AT2G28250.1,AT4G10390.1,AT1G11350.1,AT1G52290.1,AT2G28930.1,AT3G45860.1,AT1G80640.1,AT1G52310.1,AT4G23260.1,AT1G16130.1,AT4G11470.1,AT1G70110.1,AT5G35960.1,AT3G17410.1,AT4G23130.2,AT2G45590.1,AT2G31800.1,AT5G01020.1,AT4G23210.1,AT4G21390.1,AT4G18250.1,AT5G06740.1,AT5G11410.1,AT1G18160.1,AT4G34440.1,AT3G06620.1,AT4G17660.1,AT4G27300.1,AT5G39030.1,AT5G60300.1,AT4G23290.2,AT5G61350.1,AT1G49730.1,AT1G11280.1,AT1G70530.1,AT4G23050.2,AT5G01850.1,AT2G28940.2,AT4G23270.1,AT4G31100.1,AT3G06630.1,AT1G49270.1,AT4G21410.1,AT3G59110.1,AT5G59270.1,AT5G15080.1,AT2G43700.1,AT1G28390.1,AT2G30740.1,AT3G01490.1,AT1G34300.1,AT1G61360.1,AT4G32300.1,AT5G47070.1,AT4G23200.1,AT4G02420.1,AT4G25160.1,AT5G54590.2,AT1G19090.1,AT1G21250.1,AT4G23230.1,AT3G59740.1,AT5G03140.1,AT2G42630.1,AT1G24030.1,AT1G61430.1,AT1G80870.1,AT4G01330.1,AT4G23190.1,AT3G45410.1,AT2G32800.1,AT4G21400.1,AT4G11900.1,AT3G27560.1,AT2G19410.1,AT1G61460.1,AT4G23180.1,AT4G29050.1

Poptr1|555615,Poptr1|76437,Poptr1|544779,Poptr1|550086,Poptr1|555388,Poptr1|108081,Poptr1|647177,Poptr1|352817,Poptr1|557265,Poptr1|568652,Poptr1|597257,Poptr1|575189,Poptr1|568635,Poptr1|674894,Poptr1|641974,Poptr1|596408,Poptr1|55061,Poptr1|593724,Poptr1|591351,Poptr1|590406,Poptr1|674141,Poptr1|106689,Poptr1|593705,Poptr1|577280,Poptr1|99234,Poptr1|681267,Poptr1|657745,Poptr1|680920,Poptr1|356988,Poptr1|578982,Poptr1|581123,Poptr1|573592,Poptr1|585535,Poptr1|691266,Poptr1|106287,Poptr1|550702,Poptr1|544895,Poptr1|98322,Poptr1|680215,Poptr1|588088,Poptr1|349569,Poptr1|678645,Poptr1|353733,Poptr1|580018,Poptr1|648213,Poptr1|595265,Poptr1|65714,Poptr1|107935,Poptr1|545561,Poptr1|109157,Poptr1|578755,Poptr1|76280,Poptr1|107127,Poptr1|105832,Poptr1|744312,Poptr1|574794,Poptr1|584275,Poptr1|544907,Poptr1|581953,Poptr1|747080

AT5G57680.1  
AT5G11360.1  
AT1G53080.1,AT3G16530.1,AT5G03350.1,AT1G53060.1,AT1G53070.1,AT3G15356.1  
AT5G18470.1  
AT3G45390.1  
AT2G17170.1  
AT5G39370.1,AT3G12000.1  
AT2G24620.1  
AT2G17160.1  
AT2G01780.1  
AT1G07460.1  
AT4G00955.1  
AT3G57640.1,AT3G57760.1  
AT4G21366.1

Poptr1|104392,Poptr1|65368,Poptr1|64717  
Poptr1|351510  
Poptr1|107008  
Poptr1|65379  
Poptr1|568997,Poptr1|103177,Poptr1|106716,Poptr1|588616,Poptr1|588152,Poptr1|565618,Poptr1|55997  
Poptr1|569002,Poptr1|97843,Poptr1|104422  
Poptr1|101582,Poptr1|565773,Poptr1|579192  
Poptr1|590198,Poptr1|107584  
Poptr1|597551,Poptr1|568355  
Poptr1|555430  
Poptr1|597533  
Poptr1|582062  
Poptr1|588778  
Poptr1|584003  
Poptr1|589034  
Poptr1|569964  
Poptr1|585581  
Poptr1|563085  
Poptr1|595918  
Poptr1|571635  
Poptr1|561882  
Poptr1|640841  
Poptr1|594078  
Poptr1|574796  
Poptr1|669917  
Poptr1|572263  
Poptr1|547712  
Poptr1|555429,Poptr1|555434,Poptr1|104244,Poptr1|103224,Poptr1|103577,Poptr1|596195,Poptr1|589642,Poptr1|747769,Poptr1|589646,Poptr1|589639,Poptr1|597581,Poptr1|580847  
Poptr1|550409,Poptr1|586856  
Poptr1|588318,Poptr1|597602,Poptr1|586828  
Poptr1|596287,Poptr1|568357,Poptr1|594257,Poptr1|106304,Poptr1|109056  
Poptr1|589263,Poptr1|596381,Poptr1|568341,Poptr1|586668,Poptr1|568342  
Poptr1|556683  
Poptr1|741855

Poptr1|101561  
Poptr1|569304  
Poptr1|650394  
Poptr1|556151  
Poptr1|595667,Poptr1|594897,Poptr1|556896  
Poptr1|349842  
Poptr1|592406,Poptr1|562319  
Poptr1|594890,Poptr1|555155,Poptr1|555157,Poptr1|547709,Poptr1|547719  
Poptr1|592624,Poptr1|63015,Poptr1|107313  
Poptr1|587013,Poptr1|647655,Poptr1|589636,Poptr1|106565,Poptr1|97842,Poptr1|705549,Poptr1|581954,  
Poptr1|589641,Poptr1|579197  
Poptr1|544894  
Poptr1|596681  
Poptr1|576243  
Poptr1|571836,Poptr1|581559  
Poptr1|676260  
Poptr1|107544  
Poptr1|593360  
Poptr1|101830,Poptr1|584598  
Poptr1|578992  
Poptr1|581131  
Poptr1|594876  
Poptr1|103897,Poptr1|109032,Poptr1|108834  
Poptr1|352242  
Poptr1|579657,Poptr1|544799  
Poptr1|103578,Poptr1|595976  
Poptr1|102680,Poptr1|558908  
Poptr1|591139  
Poptr1|566587  
Poptr1|571837  
Poptr1|584228  
Poptr1|588941  
Poptr1|576818,Poptr1|560792  
Poptr1|109258  
Poptr1|568901  
Poptr1|742634  
Poptr1|580277,Poptr1|560796  
Poptr1|579387  
Poptr1|584640  
Poptr1|579525  
Poptr1|696273  
Poptr1|578211  
Poptr1|102930  
Poptr1|560795  
Poptr1|586369  
Poptr1|596382  
Poptr1|592667  
Poptr1|106855  
Poptr1|545123  
Poptr1|581272  
Poptr1|589638,Poptr1|582246  
Poptr1|582063  
Poptr1|349050  
Poptr1|579198  
Poptr1|569813  
Poptr1|583908  
Poptr1|108524,Poptr1|574930  
Poptr1|101170  
Poptr1|591432,Poptr1|594439  
Poptr1|568650  
Poptr1|594719  
Poptr1|108812  
Poptr1|545598  
Poptr1|106045  
Poptr1|562314  
Poptr1|650232  
Poptr1|594223  
Poptr1|653859  
Poptr1|585091  
Poptr1|53042  
Poptr1|592262  
AT3G15260.1 Poptr1|579442,Poptr1|660915  
AT1G22280.1 Poptr1|692658  
AT2G30020.1,AT1G07160.1 Poptr1|54612,Poptr1|691510  
AT4G31750.1 Poptr1|562025,Poptr1|737461  
AT1G43900.1 Poptr1|559317,Poptr1|709869  
AT4G27800.1 Poptr1|732848  
AT3G62260.2 Poptr1|700379,Poptr1|552582  
AT3G51470.1 Poptr1|349879,Poptr1|694404  
AT3G23360.1 Poptr1|564956  
AT2G40860.1 Poptr1|701296  
AT5G53140.1 Poptr1|569504,Poptr1|666170

AT2G20630.2,AT4G28400.1 Poptr1|594652  
AT1G18030.1 Poptr1|733020  
AT2G33700.1 Poptr1|73178,Poptr1|693086  
AT2G25620.1 Poptr1|561836,Poptr1|578155  
AT1G67820.1 Poptr1|566003  
AT1G34750.1  
AT1G78200.1  
AT2G40180.1  
AT4G08260.1,AT3G27140.1  
AT5G24940.1,AT5G10740.1  
AT2G34740.1  
Poptr1|685264  
Poptr1|740842,Poptr1|592376  
Poptr1|732851  
Poptr1|658020  
Poptr1|344225,Poptr1|99213  
Poptr1|65933  
Poptr1|704729  
AT5G41350.1 Poptr1|712348,Poptr1|709312  
AT5G15790.1,AT3G02290.1 Poptr1|584618,Poptr1|583858  
AT4G00335.1 Poptr1|644484,Poptr1|731133  
AT4G23450.1  
AT5G38895.1  
AT2G47270.1 Poptr1|552553,Poptr1|572593  
AT4G31270.1 Poptr1|745358,Poptr1|586353  
AT2G31480.1,AT1G05894.1 Poptr1|75418  
AT4G24210.1 Poptr1|644072,Poptr1|740519  
AT1G63650.1,AT5G41315.1 Poptr1|63535,Poptr1|684876  
AT4G09820.1 Poptr1|714955,Poptr1|346994  
Poptr1|700223,Poptr1|347973  
AT5G48170.1 Poptr1|573088  
AT3G15530.1 Poptr1|579520  
AT5G54400.1  
AT3G47420.1 Poptr1|343548,Poptr1|590185  
AT2G13100.1 Poptr1|578821  
AT4G17550.1 Poptr1|589909,Poptr1|349791  
AT4G25220.1,AT1G30560.1  
Poptr1|552752  
Poptr1|97399  
Poptr1|583339  
AT1G10800.1 Poptr1|572902,Poptr1|595676  
AT5G52180.1 Poptr1|575794  
AT4G22600.1 Poptr1|581232  
AT5G08020.1,AT5G61000.1 Poptr1|60028  
AT2G06510.1 Poptr1|672412  
AT5G45400.1 Poptr1|646356  
AT4G19130.1  
Poptr1|590115  
Poptr1|672413  
AT4G15140.1 Poptr1|695674  
AT1G56260.1 Poptr1|581919  
AT1G47410.1 Poptr1|703107,Poptr1|644143  
AT1G57540.1 Poptr1|581601  
AT2G33150.1 Poptr1|63086  
AT1G04710.1  
Poptr1|596237  
Poptr1|692211  
AT5G44005.1 Poptr1|573358,Poptr1|553318  
AT3G08780.1 Poptr1|577060  
AT4G33100.1 Poptr1|561621  
AT1G30260.1 Poptr1|648414,Poptr1|568438  
AT3G24770.1,AT4G13195.1 Poptr1|569594  
AT3G25590.1 Poptr1|354068,Poptr1|566710  
AT2G42900.1 Poptr1|559476  
AT1G68810.1 Poptr1|354125,Poptr1|55287  
AT3G56770.1,AT2G41130.1 Poptr1|351394,Poptr1|57918  
AT2G40200.1 Poptr1|656276,Poptr1|567247  
AT3G25710.1  
Poptr1|568724  
Poptr1|692616  
Poptr1|568725  
Poptr1|555689  
AT1G54920.2 Poptr1|595592  
AT5G01370.1 Poptr1|701621  
AT3G13677.1 Poptr1|582099  
AT1G67785.1 Poptr1|700972  
AT2G27050.1,AT3G20770.1 Poptr1|741749,Poptr1|556850  
AT1G73730.1 Poptr1|547903  
AT5G21120.1  
Poptr1|344834  
Poptr1|547902  
Poptr1|63001

AT3G16670.1,AT3G16660.1 Poptr1|697818  
 AT4G05390.1 Poptr1|707738  
 AT5G66190.1 Poptr1|593837,Poptr1|693589  
 AT1G30510.2  
 AT1G20020.1  
     Poptr1|580458  
     Poptr1|552549  
 AT2G29180.1 Poptr1|641159  
 ATCG00360.1 Poptr1|673933,Poptr1|673314  
 AT4G16460.1 Poptr1|652426,Poptr1|575910  
 AT4G08150.1 Poptr1|710536  
 AT1G62360.1 Poptr1|568092,Poptr1|61066  
 AT1G70510.1,AT1G23380.1 Poptr1|345543,Poptr1|658310  
     Poptr1|584721  
     Poptr1|570713,Poptr1|581961  
     Poptr1|662050  
     Poptr1|662052  
 AT3G17030.1 Poptr1|698314  
 AT5G39960.1 Poptr1|596800  
 AT5G22210.1 Poptr1|594960,Poptr1|556820  
 AT4G39900.1 Poptr1|75719  
 AT5G15802.1 Poptr1|690393  
 AT3G07150.1 Poptr1|348989  
 AT5G63200.1 Poptr1|699392  
 AT2G39760.1 Poptr1|705373,Poptr1|353592,Poptr1|698559  
 AT5G19000.1,AT3G06190.1 Poptr1|657650,Poptr1|657921  
 AT3G03740.1 Poptr1|665508  
 AT5G21010.1,AT3G43700.1  
     Poptr1|597292  
     Poptr1|741701  
     Poptr1|640870  
 AT1G61600.1 Poptr1|546565  
 AT1G13540.1,AT1G13510.1,AT1G13480.1,AT1G13530.1,AT1G13490.1,AT1G13500.1,AT1G13470.1,AT1G13520.1,A  
 T1G13550.1 Poptr1|578375,Poptr1|345214,Poptr1|696612,Poptr1|566709  
     Poptr1|594290  
     Poptr1|354067  
 ATCG00700.1 Poptr1|595931,Poptr1|557599  
 AT5G42655.1 Poptr1|347706  
 AT3G17890.1 Poptr1|354396  
 AT5G18540.1 Poptr1|704368  
 AT3G20420.1 Poptr1|660602  
 AT1G01040.1 Poptr1|552372  
 AT4G15417.1 Poptr1|348602  
 AT5G45150.1  
 AT1G50910.1 Poptr1|569106  
 AT5G06590.1 Poptr1|667548  
 AT1G02205.2 Poptr1|700690  
 AT5G57800.1 Poptr1|344516,Poptr1|689147  
 AT1G02190.1  
 AT2G37700.1  
     Poptr1|681486,Poptr1|572951  
     Poptr1|108164  
 AT5G59305.1 Poptr1|64410,Poptr1|558094  
 AT3G45900.1 Poptr1|676666  
 AT4G12540.1 Poptr1|595426  
 AT3G02120.1 Poptr1|683072,Poptr1|545863  
 AT1G34790.1 Poptr1|342488  
 AT3G57670.1 Poptr1|576326  
 AT1G08290.1 Poptr1|713454  
     Poptr1|64564,Poptr1|554968  
     Poptr1|708551  
 AT3G18310.1 Poptr1|345663  
 AT1G32370.2 Poptr1|589976  
 AT1G31175.1 Poptr1|575615  
 AT5G42785.1 Poptr1|346805,Poptr1|559742  
 AT4G13030.1 Poptr1|349015  
 AT3G20440.1 Poptr1|65427  
 AT5G03650.1 Poptr1|589574  
 AT2G36390.1  
     Poptr1|65425  
     Poptr1|49368  
 AT1G07060.1 Poptr1|641526  
 AT3G43110.1,AT5G20790.1 Poptr1|589331  
 AT1G34640.1 Poptr1|347382  
 AT2G39930.1 Poptr1|689189,Poptr1|560622  
 AT1G03310.1 Poptr1|593670  
 AT4G09020.1 Poptr1|347426  
     Poptr1|348493  
     Poptr1|572805  
     Poptr1|572806  
 AT1G36380.1 Poptr1|559165  
 AT3G07230.1 Poptr1|709977,Poptr1|573350

AT3G62920.1 Poptr1|572736  
AT1G75810.1 Poptr1|73061  
Poptr1|550865  
AT2G20500.1 Poptr1|559694,Poptr1|551038  
AT5G18930.1 Poptr1|565682,Poptr1|565288  
AT5G15950.1,AT3G02470.1 Poptr1|566714,Poptr1|97052,Poptr1|556183  
AT3G25570.1  
ATCG00070.1 Poptr1|581702,Poptr1|738940  
AT3G50380.1 Poptr1|563057  
AT5G37290.1 Poptr1|63816  
AT4G18820.1,AT5G45720.1 Poptr1|568667,Poptr1|693987  
AT4G24790.1 Poptr1|570191,Poptr1|575274  
AT2G02480.1,AT1G14460.1 Poptr1|60080,Poptr1|553540  
Poptr1|570333  
Poptr1|579788  
AT5G52580.1 Poptr1|351582  
Poptr1|578917  
AT4G19400.1 Poptr1|693533  
AT4G24370.1 Poptr1|563403  
AT1G05060.1 Poptr1|572996  
AT3G59840.1 Poptr1|591642  
AT5G01520.1 Poptr1|351904,Poptr1|576963  
AT3G47160.1,AT5G58787.1 Poptr1|48973,Poptr1|723061  
AT1G24440.1 Poptr1|726155,Poptr1|720190  
AT1G13195.1  
Poptr1|704174,Poptr1|647991  
Poptr1|345990  
AT5G52900.1 Poptr1|580578,Poptr1|569443  
AT2G04235.1 Poptr1|65083  
AT5G03430.1 Poptr1|59177  
AT1G77760.1,AT1G37130.1 Poptr1|551506,Poptr1|685276  
Poptr1|572460  
AT5G45310.1 Poptr1|681134  
AT5G23610.1 Poptr1|97927  
Poptr1|573610  
ATCG00420.1 Poptr1|582254  
Poptr1|581565  
AT4G25760.1,AT5G57685.1 Poptr1|562029,Poptr1|585147,Poptr1|106883  
AT4G31730.1,AT2G24762.1  
AT5G24920.1  
Poptr1|545702,Poptr1|580728,Poptr1|670814  
Poptr1|669220  
AT2G23670.1 Poptr1|563064  
AT1G68680.1 Poptr1|568194  
ATCG01060.1 Poptr1|589105  
Poptr1|577108  
AT3G60310.1 Poptr1|561018  
AT2G01913.1 Poptr1|658675,Poptr1|696481  
AT1G12790.1 Poptr1|65596  
AT5G25570.1 Poptr1|561806,Poptr1|570611  
AT1G03180.1 Poptr1|559543,Poptr1|342305  
AT3G52230.1 Poptr1|725175  
AT4G34880.1 Poptr1|557117,Poptr1|557116,Poptr1|546198,Poptr1|713230,Poptr1|694217  
Poptr1|107331,Poptr1|556600  
Poptr1|106630,Poptr1|556601  
Poptr1|546200  
Poptr1|591072  
AT3G07440.1 Poptr1|711532  
AT4G30150.1 Poptr1|556586  
AT1G04670.1 Poptr1|63095,Poptr1|350657  
AT5G17840.1 Poptr1|702459  
AT2G41610.1 Poptr1|731485  
AT2G33855.1 Poptr1|555757  
AT3G52880.1 Poptr1|739728  
AT1G63940.2 Poptr1|640443  
AT3G27820.1 Poptr1|706750  
AT5G03630.1  
AT3G09940.1  
Poptr1|554412  
Poptr1|595124,Poptr1|105045  
Poptr1|109112  
AT1G01690.1 Poptr1|572260  
AT1G73165.1 Poptr1|550296,Poptr1|568620  
AT4G37440.1 Poptr1|587061,Poptr1|72071  
AT4G28210.1 Poptr1|730523  
AT3G13580.1,AT2G01250.1,AT2G44120.2 Poptr1|698749,Poptr1|579008,Poptr1|655662,Poptr1|652850  
AT1G80750.1 Poptr1|693215,Poptr1|690900  
AT3G59680.2 Poptr1|683160  
AT5G53880.1 Poptr1|703940  
Poptr1|660918  
AT1G60870.1 Poptr1|671976,Poptr1|717275  
AT4G27510.1 Poptr1|545829

AT5G41560.1 Poptr1|709269  
 AT1G10180.1 Poptr1|61253,Poptr1|57735  
 AT5G49830.1 Poptr1|563473,Poptr1|687436  
 AT1G10385.1 Poptr1|576432  
 Poptr1|593020  
 Poptr1|583926  
 Poptr1|352190  
 AT5G54855.1 Poptr1|682731  
 AT1G05950.1 Poptr1|562245  
 AT4G26370.1 Poptr1|712227  
 AT5G19970.1 Poptr1|100593  
 AT4G00525.1 Poptr1|552165  
 AT1G32310.1 Poptr1|349915,Poptr1|590043  
 AT1G72060.1 Poptr1|574249  
 AT4G35260.1 Poptr1|721283,Poptr1|703569  
 AT1G32480.1,AT2G17130.1  
 Poptr1|558763,Poptr1|695999  
 AT4G19070.1 Poptr1|590104  
 AT1G77350.1 Poptr1|581031  
 AT2G25625.1 Poptr1|654086  
 AT5G17870.1 Poptr1|681956  
 AT4G37510.1 Poptr1|684970  
 AT1G36940.1 Poptr1|347313,Poptr1|559175  
 AT5G39850.1 Poptr1|577830,Poptr1|576570,Poptr1|698986,Poptr1|712471  
 AT5G15200.1  
 Poptr1|680135  
 Poptr1|748598  
 Poptr1|585702  
 AT5G49320.1 Poptr1|345210  
 AT1G19340.1 Poptr1|59422  
 AT2G07698.1,ATMG01200.1,ATCG00120.1,ATMG01190.1 Poptr1|705671  
 Poptr1|641458  
 Poptr1|569856  
 Poptr1|589102  
 Poptr1|594336  
 AT3G12345.1 Poptr1|353472  
 AT1G05430.1 Poptr1|657177,Poptr1|658512  
 AT2G37020.1 Poptr1|689389  
 AT3G27520.1 Poptr1|549569  
 AT1G21500.1 Poptr1|704545  
 AT2G31930.1 Poptr1|98548,Poptr1|558140  
 AT5G67350.1 Poptr1|72079,Poptr1|349797  
 AT2G16510.1 Poptr1|648708  
 AT1G19910.1 Poptr1|710566  
 AT4G34720.1  
 AT4G38920.1  
 Poptr1|557166  
 Poptr1|655432  
 Poptr1|551446,Poptr1|715363  
 AT3G47510.1 Poptr1|671324  
 AT1G74340.1 Poptr1|702943  
 AT3G49400.1 Poptr1|569617  
 AT1G68080.1 Poptr1|696484  
 AT3G05320.1 Poptr1|61249  
 AT3G19260.1 Poptr1|581512  
 AT3G25540.1,AT1G13580.2 Poptr1|55301,Poptr1|696597  
 Poptr1|689888  
 AT3G44735.1 Poptr1|556949,Poptr1|594834  
 AT3G60850.1 Poptr1|572113  
 AT2G37300.1 Poptr1|561537,Poptr1|576625  
 AT5G35320.1 Poptr1|560623,Poptr1|702320  
 AT4G16320.1 Poptr1|559801,Poptr1|643020  
 AT5G12240.1 Poptr1|691492,Poptr1|649883  
 ATMG00180.1 Poptr1|102315  
 Poptr1|585291  
 AT3G53620.1 Poptr1|652945  
 AT1G01050.1 Poptr1|342856,Poptr1|664206,Poptr1|748006  
 AT4G01480.1  
 AT2G46860.1  
 Poptr1|76322  
 AT3G29300.1 Poptr1|578454  
 AT4G35905.1 Poptr1|666183  
 AT1G68585.1 Poptr1|698249,Poptr1|656798  
 AT4G40045.1 Poptr1|563630  
 AT3G56820.1 Poptr1|560292  
 AT5G02200.1 Poptr1|560778,Poptr1|576811  
 AT3G27440.1 Poptr1|577497  
 AT5G40870.1,AT3G27190.1 Poptr1|691636  
 AT1G55810.1 Poptr1|582568,Poptr1|708138  
 AT4G26510.1  
 Poptr1|596641  
 AT1G20430.1 Poptr1|550806



AT3G62450.1 Poptr1|558493  
Poptr1|562553  
AT3G23600.1 Poptr1|696260  
AT3G23570.1  
Poptr1|718539  
Poptr1|565313  
AT5G04560.1,AT3G10010.1,AT4G34060.1  
Poptr1|356540,Poptr1|589566,Poptr1|725487,Poptr1|660203,Poptr1|563635,Poptr1|60256,Poptr1|563634,  
Poptr1|356541,Poptr1|356539,Poptr1|655818  
AT2G36490.1  
AT3G12580.1 Poptr1|696865,Poptr1|705180,Poptr1|705179,Poptr1|656087,Poptr1|687360,Poptr1|563887  
AT1G79930.1 Poptr1|693705,Poptr1|691220  
AT5G09600.1 Poptr1|707524,Poptr1|575175  
AT1G11660.1 Poptr1|727116  
AT4G16660.1 Poptr1|560245,Poptr1|576003  
AT5G09590.1 Poptr1|686778,Poptr1|49351  
AT5G28540.1,AT5G42020.1 Poptr1|693359,Poptr1|548298  
AT5G49910.1,AT4G24280.1 Poptr1|583507,Poptr1|596744  
AT2G32120.1 Poptr1|658534,Poptr1|657150  
AT5G02500.1,AT5G02490.1  
AT3G09440.1  
AT1G56410.1  
AT1G79920.1  
AT4G37910.1  
Poptr1|563896  
Poptr1|343843,Poptr1|587191  
Poptr1|551591,Poptr1|705106  
Poptr1|669558  
Poptr1|553706  
Poptr1|647577  
Poptr1|713515  
Poptr1|107954  
Poptr1|574721,Poptr1|569578  
Poptr1|687928  
Poptr1|108609  
Poptr1|666103  
Poptr1|574221  
AT1G79550.1 Poptr1|659332,Poptr1|564181  
AT1G56190.1,AT3G12780.1 Poptr1|724208,Poptr1|564182  
Poptr1|104879  
Poptr1|104960  
AT4G28770.1,AT2G20230.1 Poptr1|711517  
AT1G32400.1 Poptr1|589970  
AT2G20740.1 Poptr1|730478,Poptr1|690032  
Poptr1|583267  
Poptr1|580887,Poptr1|545316  
Poptr1|352802,Poptr1|578104  
AT3G17790.1 Poptr1|345659,Poptr1|743529  
AT2G01890.1,AT1G14700.1 Poptr1|696483,Poptr1|103988  
AT1G25230.1  
AT2G01880.1  
Poptr1|566395  
Poptr1|704105  
Poptr1|573678  
Poptr1|571295  
Poptr1|595792  
AT3G14050.1,AT1G54130.1 Poptr1|548569,Poptr1|685048  
Poptr1|584107,Poptr1|103734  
AT3G61690.1 Poptr1|348068  
Poptr1|569495,Poptr1|574810  
Poptr1|552683,Poptr1|568869  
Poptr1|569494  
AT3G01680.1 Poptr1|64857,Poptr1|705601,Poptr1|701780,Poptr1|565119,Poptr1|595774  
AT3G01670.1  
Poptr1|658236,Poptr1|670169,Poptr1|671045,Poptr1|641699,Poptr1|705493,Poptr1|641693  
Poptr1|641694,Poptr1|588638,Poptr1|108632  
Poptr1|355976  
AT3G59940.1,AT2G44130.1 Poptr1|75240  
AT1G15670.1,AT1G80440.1 Poptr1|48821  
Poptr1|555218  
Poptr1|548664  
Poptr1|561211,Poptr1|547623  
AT1G52320.1 Poptr1|63980,Poptr1|343346  
AT5G25590.1 Poptr1|668960,Poptr1|654044  
AT1G17290.1,AT1G72330.1 Poptr1|684996,Poptr1|584163  
AT1G23310.1,AT1G70580.1 Poptr1|687054,Poptr1|565169  
Poptr1|673711  
AT5G13650.2 Poptr1|695530  
AT2G31060.2 Poptr1|672331  
Poptr1|351541  
Poptr1|579407  
Poptr1|667443

Poptr1|665843  
 Poptr1|586550  
 Poptr1|672330  
 Poptr1|665842  
 AT3G47800.1 Poptr1|736262,Poptr1|736257,Poptr1|714475  
 AT3G17940.1 Poptr1|687734  
 AT5G15140.1  
 AT3G01260.1  
 Poptr1|575692  
 Poptr1|699262  
 Poptr1|348788  
 AT5G11380.1 Poptr1|737131,Poptr1|561848  
 AT4G15560.1 Poptr1|725726,Poptr1|354877  
 AT3G21500.2  
 Poptr1|597251  
 Poptr1|574104  
 Poptr1|554004,Poptr1|99588  
 Poptr1|581625  
 AT1G11545.1 Poptr1|55748,Poptr1|555366  
 AT4G25810.1,AT5G57560.1 Poptr1|570685,Poptr1|737795,Poptr1|351629,Poptr1|60567,Poptr1|737800  
 AT5G13870.1 Poptr1|732010  
 AT1G10550.1 Poptr1|731609  
 AT1G32170.1 Poptr1|646298,Poptr1|590065  
 AT3G44990.1 Poptr1|589488,Poptr1|576796,Poptr1|686936  
 AT2G01850.1,AT1G14720.1 Poptr1|658681,Poptr1|720800  
 AT4G03210.1 Poptr1|571855,Poptr1|574524  
 AT5G65730.1 Poptr1|655512  
 AT4G13090.1,AT4G13080.1 Poptr1|343156  
 AT4G14130.1,AT3G23730.1 Poptr1|342333,Poptr1|711462,Poptr1|572886  
 AT2G14620.1 Poptr1|557559  
 AT5G57530.1,AT5G57540.1,AT4G25820.1  
 AT4G18990.1  
 AT2G36870.1  
 AT4G37800.1  
 AT3G25050.1  
 AT3G48580.1  
 Poptr1|582987  
 Poptr1|99605  
 Poptr1|640150,Poptr1|712151  
 Poptr1|594976,Poptr1|54265  
 Poptr1|552110  
 Poptr1|584844,Poptr1|714863,Poptr1|559468  
 Poptr1|568475  
 Poptr1|555810  
 Poptr1|568474  
 AT2G46800.1 Poptr1|731458,Poptr1|348167  
 AT2G29410.1 Poptr1|108638,Poptr1|549120  
 AT3G61940.1  
 Poptr1|49458,Poptr1|569258  
 Poptr1|108733  
 Poptr1|581110  
 AT1G53300.1 Poptr1|568822  
 AT5G10090.1,AT5G65160.1 Poptr1|71653,Poptr1|562618  
 AT3G58620.1,AT2G42580.1  
 AT3G14950.1  
 Poptr1|745239  
 Poptr1|745241  
 Poptr1|559120,Poptr1|551563  
 AT2G39730.1 Poptr1|656126,Poptr1|698568  
 AT1G73110.1 Poptr1|48478  
 Poptr1|576820  
 Poptr1|62816  
 Poptr1|555139  
 AT2G29690.1 Poptr1|686859  
 Poptr1|579106  
 Poptr1|64279  
 AT1G04645.1  
 Poptr1|593687,Poptr1|592881,Poptr1|584561,Poptr1|584550,Poptr1|584551,Poptr1|595642,Poptr1|58131  
 4  
 AT5G12060.1,AT3G17080.1,AT5G12070.1,AT4G16195.1,AT3G16970.1  
 AT4G24975.1  
 AT3G57840.1  
 AT1G27730.1,AT5G43170.1,AT5G04340.1 Poptr1|730802,Poptr1|710467  
 AT3G49930.1  
 Poptr1|684005  
 AT5G61510.1 Poptr1|742642,Poptr1|702930  
 AT4G21580.1 Poptr1|555515  
 Poptr1|573233  
 AT5G22030.1 Poptr1|64148  
 AT4G10590.1,AT4G10570.1,AT1G32850.1 Poptr1|49455,Poptr1|569279  
 AT2G40930.1 Poptr1|104601,Poptr1|560337  
 Poptr1|717619

Poptr1|576472  
 Poptr1|705561  
 AT4G25770.1 Poptr1|58713  
 AT1G10040.1 Poptr1|347536  
 AT5G51180.1 Poptr1|708973,Poptr1|588767  
 AT1G29120.1 Poptr1|568722  
 Poptr1|747091  
 AT2G44620.1 Poptr1|677714,Poptr1|711128  
 AT1G65290.1 Poptr1|574083,Poptr1|596956  
 AT5G47630.1 Poptr1|701221,Poptr1|652365  
 AT5G36280.1  
 AT1G30820.1 Poptr1|711917,Poptr1|345087  
 AT4G02120.1 Poptr1|688250  
 AT4G20320.1  
 AT2G34890.1  
 Poptr1|671453  
 AT5G57360.1 Poptr1|58690,Poptr1|690044  
 AT1G68050.1 Poptr1|687137,Poptr1|345333  
 AT2G18915.2  
 AT5G23410.1  
 Poptr1|589736  
 AT2G38640.1 Poptr1|589592,Poptr1|668268  
 AT5G41590.1 Poptr1|48712,Poptr1|350283  
 AT1G80120.1 Poptr1|705853,Poptr1|740895  
 AT3G15810.1  
 Poptr1|701713,Poptr1|589589  
 AT1G59710.1 Poptr1|565238,Poptr1|565414  
 AT3G28630.1 Poptr1|545779,Poptr1|577559,Poptr1|587022  
 AT1G69900.1,AT1G27100.1  
 AT1G69890.1  
 AT3G01311.1  
 Poptr1|587023,Poptr1|545780,Poptr1|577558  
 AT5G62740.1 Poptr1|355785,Poptr1|577585  
 AT1G69840.1 Poptr1|577584  
 AT5G51570.1 Poptr1|666917,Poptr1|728640  
 AT3G01290.1  
 Poptr1|97404  
 Poptr1|658442  
 AT1G27210.1 Poptr1|354832  
 AT4G27060.1 Poptr1|730372  
 AT5G62580.1 Poptr1|570031,Poptr1|688477  
 AT2G07170.1 Poptr1|351716  
 AT1G59850.1  
 AT1G50890.1  
 Poptr1|569109  
 Poptr1|569108  
 Poptr1|65283  
 Poptr1|99230  
 AT5G66140.1,AT3G51260.1 Poptr1|649230,Poptr1|713304  
 AT1G47250.1,AT5G42790.1 Poptr1|715245  
 Poptr1|579893  
 AT2G25430.1,AT4G32285.1 Poptr1|737211,Poptr1|561905  
 AT1G05020.1 Poptr1|348583,Poptr1|348584,Poptr1|573012  
 AT4G02650.1,AT1G03050.1 Poptr1|59200  
 Poptr1|578924,Poptr1|560584  
 AT1G69230.1 Poptr1|698365  
 AT4G23496.1 Poptr1|683674,Poptr1|693415  
 AT2G03680.1  
 Poptr1|577765  
 Poptr1|680830  
 AT3G06560.1 Poptr1|564363  
 AT1G17980.1 Poptr1|574950  
 AT2G25850.2,AT4G32850.8 Poptr1|344653  
 Poptr1|58464  
 Poptr1|596695  
 Poptr1|587280  
 AT1G02816.1,AT4G02370.1 Poptr1|692296,Poptr1|57201  
 AT5G19590.1 Poptr1|585413  
 AT4G02360.1  
 Poptr1|581894,Poptr1|570772  
 Poptr1|572677  
 AT1G48090.1 Poptr1|564344  
 AT4G17140.1 Poptr1|356552  
 AT4G17130.1  
 AT4G17110.1,AT4G17120.1  
 Poptr1|356553  
 Poptr1|566891  
 AT2G38400.1 Poptr1|560972,Poptr1|701667  
 AT4G39660.1 Poptr1|562661  
 AT3G08860.1  
 Poptr1|558595  
 AT4G05130.1,AT4G05110.1,AT4G05140.1,AT4G05120.1 Poptr1|694040,Poptr1|544983,Poptr1|55787

AT3G09990.1  
AT1G61630.1  
    Poptr1|571813  
    Poptr1|571814  
    Poptr1|555474  
AT1G75080.1,AT1G19350.3    Poptr1|591830,Poptr1|551922  
AT1G78700.1    Poptr1|555627,Poptr1|585501,Poptr1|55915  
    Poptr1|593971,Poptr1|563100  
AT5G41670.1,AT1G64190.1    Poptr1|343671,Poptr1|548377  
AT3G02360.1    Poptr1|544734,Poptr1|704127,Poptr1|694086  
    Poptr1|345228  
    Poptr1|577381  
AT4G16650.1    Poptr1|739867,Poptr1|349738  
AT1G04910.1    Poptr1|703871,Poptr1|65076  
AT1G35510.1    Poptr1|59000  
AT5G35570.1    Poptr1|702660  
AT5G63390.1    Poptr1|575321  
AT4G24530.1    Poptr1|551659  
AT1G22460.1    Poptr1|347420,Poptr1|559064  
AT2G44500.1    Poptr1|583251  
AT3G30300.1    Poptr1|746118,Poptr1|98855  
AT2G37980.1,AT3G54100.1    Poptr1|560864  
AT1G29200.1    Poptr1|728166  
AT1G11990.1,AT1G62330.1    Poptr1|584715,Poptr1|568088  
AT1G38065.1,AT1G38131.1    Poptr1|710824,Poptr1|72424  
AT3G26370.1    Poptr1|686197,Poptr1|697966  
AT1G14970.1,AT2G01480.1    Poptr1|55219,Poptr1|354258  
AT5G65470.1    Poptr1|563296  
AT1G76270.1,AT1G20550.1    Poptr1|52260,Poptr1|342122  
AT3G02250.1,AT5G15740.1    Poptr1|583872,Poptr1|584629  
AT5G64600.1    Poptr1|595367  
AT1G52630.1    Poptr1|349477  
AT2G03280.2,AT1G14020.1    Poptr1|656470,Poptr1|724141  
AT3G07900.1  
AT5G01100.1  
    Poptr1|570231  
    Poptr1|588139  
    Poptr1|585841  
    Poptr1|723398  
    Poptr1|585784  
    Poptr1|647853  
    Poptr1|108207  
    Poptr1|546314  
    Poptr1|700820,Poptr1|729137  
    Poptr1|705607  
    Poptr1|63691  
AT5G24810.1    Poptr1|583172  
    Poptr1|577777,Poptr1|100056  
    Poptr1|594267  
    Poptr1|100054  
    Poptr1|592116,Poptr1|100052  
    Poptr1|586333  
AT5G08670.1,AT5G08680.1,AT5G08690.1    Poptr1|687172,Poptr1|720156  
ATCG00480.1  
AT3G14000.1    Poptr1|693739  
AT5G20540.1    Poptr1|58433,Poptr1|344358  
AT1G31880.1,AT2G35600.1    Poptr1|343511,Poptr1|346294  
AT1G54180.1  
AT1G54190.1  
AT2G21030.1  
    Poptr1|548591  
AT4G18730.1,AT5G45775.2,AT2G42740.1,AT3G58700.1  
    Poptr1|728157,Poptr1|682238,Poptr1|695206,Poptr1|568685  
    Poptr1|347504  
AT3G02700.1    Poptr1|648211,Poptr1|106807,Poptr1|741019  
AT1G01225.1    Poptr1|644614,Poptr1|700304  
AT5G06370.1    Poptr1|561143  
AT5G16360.1  
AT5G16330.1  
AT4G00905.1  
    Poptr1|571064  
    Poptr1|595395  
AT5G46060.1    Poptr1|65551  
AT5G43180.1    Poptr1|688871  
AT4G31330.1,AT5G10580.1    Poptr1|745339  
AT5G24790.1  
    Poptr1|586058  
AT1G43130.1    Poptr1|643454  
AT2G18460.2    Poptr1|689723  
AT2G20130.1,AT2G20120.1    Poptr1|669317,Poptr1|584036  
    Poptr1|685246  
    Poptr1|678988

Poptr1|563143  
Poptr1|674284  
AT5G49950.1 Poptr1|596728  
AT1G34340.1 Poptr1|593022  
AT3G50790.1 Poptr1|554558  
Poptr1|105131  
Poptr1|574301  
AT4G24220.1  
Poptr1|551803,Poptr1|740554,Poptr1|592041,Poptr1|551804,Poptr1|712206,Poptr1|592040,Poptr1|67792  
6,Poptr1|703162  
AT5G58750.1 Poptr1|54699  
Poptr1|557481  
Poptr1|673743  
Poptr1|594509,Poptr1|594510  
Poptr1|103519  
AT5G03490.1,AT1G51210.1 Poptr1|566744  
AT5G12890.1 Poptr1|547900,Poptr1|639901  
AT3G50740.1,AT5G26310.1,AT5G66690.1 Poptr1|563103,Poptr1|563104  
AT2G30150.1,AT2G30140.1 Poptr1|706632,Poptr1|557619,Poptr1|557617,Poptr1|557616,Poptr1|706639  
AT1G05680.1,AT2G31790.1  
Poptr1|103429,Poptr1|556682,Poptr1|562134,Poptr1|585760,Poptr1|573178,Poptr1|591074  
AT1G24100.1 Poptr1|575116,Poptr1|718172  
AT3G46720.1,AT3G46650.1,AT5G59590.1,AT3G46670.1,AT3G46700.1,AT3G46660.1,AT5G59580.1,AT3G46690.1,A  
T3G46680.1,AT5G38010.1,AT5G38040.1 Poptr1|549119,Poptr1|54725  
AT2G15490.1,AT4G34131.1,AT2G15480.1,AT4G34135.1,AT4G34138.1  
Poptr1|65211,Poptr1|580281,Poptr1|557412,Poptr1|49292,Poptr1|54516  
AT2G23210.1,AT2G23260.1,AT2G23250.1 Poptr1|587034  
AT3G55700.1,AT3G55710.1 Poptr1|567335,Poptr1|579638,Poptr1|579636,Poptr1|567337  
AT2G16890.2,AT5G14860.1 Poptr1|64773  
AT3G16520.3 Poptr1|555559,Poptr1|555562,Poptr1|592940,Poptr1|648281,Poptr1|678615  
AT5G49690.1 Poptr1|343844  
AT4G15550.1,AT1G05560.1  
Poptr1|593295,Poptr1|645348,Poptr1|645347,Poptr1|344164,Poptr1|572884,Poptr1|576324  
AT2G28080.1 Poptr1|584434,Poptr1|54835  
AT2G29740.1,AT1G07260.1,AT1G07250.1,AT1G07240.1,AT2G29750.1  
Poptr1|575957,Poptr1|575969,Poptr1|557941  
AT4G15500.1,AT3G21560.1,AT4G15490.1,AT4G15480.1 Poptr1|54529,Poptr1|557446  
AT2G36780.1,AT2G36750.1,AT2G36790.1,AT2G36760.1,AT2G36800.1,AT2G36770.1,AT3G53160.1  
Poptr1|355505  
AT3G53150.1 Poptr1|59191  
AT1G01420.1,AT4G01070.1,AT1G01390.1 Poptr1|731284,Poptr1|711256  
AT1G73880.1 Poptr1|569924  
AT3G02100.1 Poptr1|556409,Poptr1|546621  
AT2G22590.1 Poptr1|597503,Poptr1|48497,Poptr1|579010,Poptr1|569453  
AT1G22370.2,AT1G22340.1,AT1G22380.1,AT1G22360.1,AT1G22400.1  
Poptr1|342489,Poptr1|347400,Poptr1|668364,Poptr1|577393,Poptr1|49270  
AT4G15280.1,AT3G21790.1,AT3G21800.1,AT3G21780.1,AT3G21760.1,AT3G21750.1  
Poptr1|560124,Poptr1|560122,Poptr1|560126,Poptr1|560119,Poptr1|575974,Poptr1|575976,Poptr1|57598  
0,Poptr1|575975,Poptr1|343997,Poptr1|575971,Poptr1|593730,Poptr1|104164,Poptr1|575972,Poptr1|575979,Poptr1|6  
70180,Poptr1|560127  
AT5G17040.1,AT1G30530.1,AT5G17030.1,AT5G17050.1 Poptr1|592179,Poptr1|571764,Poptr1|56863  
AT1G06000.1  
AT2G18570.1  
AT4G36770.1  
AT2G31750.1  
AT2G43840.1,AT2G43820.1  
AT2G26480.1  
AT5G37950.1  
AT5G05890.1,AT5G05900.1,AT5G05870.1,AT5G05860.1,AT5G05880.1  
AT3G11340.1  
AT1G10400.1  
AT4G14090.1  
AT1G05530.1  
AT2G36970.1  
AT2G29730.1,AT2G29710.1  
AT1G78270.1  
AT4G15260.1  
AT4G15270.1  
Poptr1|577578,Poptr1|597599,Poptr1|577583,Poptr1|577576  
Poptr1|593494,Poptr1|577580,Poptr1|102300  
Poptr1|62996  
Poptr1|563110  
Poptr1|586619  
Poptr1|641531  
Poptr1|557618  
Poptr1|107679  
Poptr1|64702  
Poptr1|562352,Poptr1|586997,Poptr1|562129  
Poptr1|597700,Poptr1|556680  
Poptr1|573177  
Poptr1|585831  
Poptr1|102627

Poptr1|595283  
Poptr1|579477  
Poptr1|558003  
Poptr1|560477  
Poptr1|103532,Poptr1|595175,Poptr1|591628,Poptr1|103526  
Poptr1|567809,Poptr1|578369,Poptr1|583123,Poptr1|583124,Poptr1|583121,Poptr1|595579  
Poptr1|557417,Poptr1|65206,Poptr1|586382,Poptr1|551831  
Poptr1|585905,Poptr1|591150  
Poptr1|590098  
Poptr1|594798,Poptr1|588237,Poptr1|581655,Poptr1|679295  
Poptr1|557419,Poptr1|557418,Poptr1|572238  
Poptr1|595173  
Poptr1|594083  
Poptr1|590486  
Poptr1|579637  
Poptr1|678842,Poptr1|647762,Poptr1|593265  
Poptr1|588896,Poptr1|102208,Poptr1|555563  
Poptr1|592942,Poptr1|573623  
Poptr1|545929  
Poptr1|569437,Poptr1|580586,Poptr1|580585,Poptr1|661415  
Poptr1|580587  
Poptr1|556129  
Poptr1|590426  
Poptr1|557973,Poptr1|544951,Poptr1|58295  
Poptr1|724363  
Poptr1|560147,Poptr1|575970  
Poptr1|646335  
Poptr1|590097  
Poptr1|560466  
Poptr1|595172  
Poptr1|731282  
Poptr1|554472  
Poptr1|567974  
Poptr1|595660,Poptr1|59419  
Poptr1|56583,Poptr1|726527  
Poptr1|572296,Poptr1|692392  
Poptr1|568373  
Poptr1|57878,Poptr1|560263,Poptr1|58309,Poptr1|576016,Poptr1|577395,Poptr1|592440,Poptr1|560250,  
Poptr1|576025,Poptr1|576034,Poptr1|576021,Poptr1|577390,Poptr1|560265,Poptr1|57880,Poptr1|577392,Poptr1|586  
558,Poptr1|75706,Poptr1|734607,Poptr1|53070,Poptr1|584104,Poptr1|576018,Poptr1|344037,Poptr1|560247,Poptr1|5  
60258,Poptr1|57877  
Poptr1|707232,Poptr1|577394  
Poptr1|104991  
Poptr1|715869  
Poptr1|656173,Poptr1|576873,Poptr1|576872  
Poptr1|576031,Poptr1|593123,Poptr1|713259,Poptr1|576026  
Poptr1|105405,Poptr1|589092  
Poptr1|668360,Poptr1|577047,Poptr1|577045  
Poptr1|576029,Poptr1|576028,Poptr1|576020  
Poptr1|560259,Poptr1|579523,Poptr1|576030,Poptr1|575988  
Poptr1|576035  
Poptr1|576033  
Poptr1|576013,Poptr1|588758,Poptr1|560255  
Poptr1|596294  
Poptr1|582127,Poptr1|577046  
Poptr1|562577  
Poptr1|576038,Poptr1|597440,Poptr1|576037  
Poptr1|576015  
Poptr1|65116  
Poptr1|585707  
Poptr1|592441  
Poptr1|705459,Poptr1|575952,Poptr1|575953,Poptr1|560148,Poptr1|575956  
Poptr1|575981,Poptr1|575977,Poptr1|575978  
Poptr1|579805,Poptr1|560121,Poptr1|575973,Poptr1|586091  
Poptr1|560123  
Poptr1|586090,Poptr1|585386  
Poptr1|557092,Poptr1|584786  
Poptr1|586456,Poptr1|597480  
Poptr1|593304  
Poptr1|574348  
AT1G79430.2 Poptr1|345095,Poptr1|724244  
AT3G24120.2,AT4G13640.2 Poptr1|668388,Poptr1|641929  
AT5G45580.1 Poptr1|554102,Poptr1|356719  
AT1G32240.1 Poptr1|349927,Poptr1|590054  
AT3G04030.2,AT5G18240.1 Poptr1|571228  
AT5G29000.2,AT3G04450.1 Poptr1|702383,Poptr1|711538,Poptr1|571111  
AT1G14600.1 Poptr1|657051,Poptr1|658655,Poptr1|657052  
AT3G13040.1 Poptr1|582202,Poptr1|563369  
AT5G06800.1 Poptr1|653502,Poptr1|701355  
AT5G42630.1 Poptr1|551895  
AT1G69580.1 Poptr1|567034,Poptr1|564213  
AT2G01060.1 Poptr1|560052,Poptr1|683393

AT3G12730.1  
AT4G17695.1  
AT2G20400.1,AT4G28610.1  
Poptr1|568185  
Poptr1|582337  
Poptr1|347022  
Poptr1|584524  
Poptr1|576276,Poptr1|595853,Poptr1|105854,Poptr1|579580  
Poptr1|583275  
Poptr1|98519  
Poptr1|591871  
Poptr1|653130,Poptr1|576977  
AT5G40650.1,AT3G27380.1 Poptr1|681846  
AT2G34520.1 Poptr1|679014,Poptr1|663376  
AT5G65165.1  
ATCG00330.1  
Poptr1|592418,Poptr1|591302,Poptr1|678862  
AT3G23410.1 Poptr1|686215  
AT4G28570.1  
AT1G03990.1  
Poptr1|597348  
AT5G18280.1,AT3G04080.1 Poptr1|729946  
Poptr1|594315,Poptr1|571165,Poptr1|106517  
Poptr1|593483,Poptr1|573883  
Poptr1|573882  
AT1G31440.1 Poptr1|590138,Poptr1|343530  
AT4G34660.1 Poptr1|694190,Poptr1|557182  
AT4G18060.1 Poptr1|746791,Poptr1|727878  
AT4G39020.1  
Poptr1|674790  
AT1G69620.1,AT1G26880.1 Poptr1|701826  
AT3G28900.1  
Poptr1|733792  
Poptr1|576920,Poptr1|570360  
Poptr1|743295  
Poptr1|679326  
Poptr1|679325  
AT1G22410.1 Poptr1|710522,Poptr1|51918,Poptr1|694307  
AT4G39980.1  
AT4G33510.1  
Poptr1|654749  
AT4G35090.1 Poptr1|550767,Poptr1|694906  
AT1G20630.1  
AT1G20620.4  
Poptr1|98898,Poptr1|685210  
AT1G30760.1,AT2G34790.1  
Poptr1|98171,Poptr1|582608,Poptr1|101686,Poptr1|677281,Poptr1|98184,Poptr1|708080,Poptr1|98177,Poptr1|582619,Poptr1|550594,Poptr1|691944,Poptr1|550591,Poptr1|569341,Poptr1|739441,Poptr1|582610,Poptr1|569344,Poptr1|582617  
AT4G20820.1,AT5G44410.1,AT5G44440.1  
Poptr1|569334,Poptr1|642620,Poptr1|569332,Poptr1|582590,Poptr1|550581,Poptr1|65893,Poptr1|100286,Poptr1|103056,Poptr1|582591,Poptr1|550604,Poptr1|98154,Poptr1|582604,Poptr1|687662,Poptr1|672203,Poptr1|597710,Poptr1|593092,Poptr1|593088,Poptr1|98158,Poptr1|65979,Poptr1|550576,Poptr1|98159,Poptr1|590917,Poptr1|550579,Poptr1|65903,Poptr1|582593,Poptr1|65901,Poptr1|550587,Poptr1|65896  
AT1G26420.1,AT1G26380.1,AT4G20800.1,AT1G26410.1,AT1G26400.1,AT1G26390.1  
Poptr1|65870,Poptr1|550549,Poptr1|65868,Poptr1|550550,Poptr1|65867,Poptr1|569314  
AT5G44400.1,AT5G44390.1,AT5G44380.1  
AT1G01980.1,AT1G11770.1,AT4G20840.1,AT4G20830.1  
AT5G44360.1,AT4G20860.1  
AT1G30700.1  
AT1G30740.1  
Poptr1|569345,Poptr1|594082,Poptr1|592103,Poptr1|582620,Poptr1|582609,Poptr1|569342  
Poptr1|65912,Poptr1|580571  
Poptr1|582605,Poptr1|65919  
Poptr1|550605,Poptr1|595287  
Poptr1|582615,Poptr1|569448  
Poptr1|98180  
AT5G16680.1,AT3G02890.1 Poptr1|573998  
AT1G43770.1 Poptr1|559349,Poptr1|562423,Poptr1|72421  
AT5G61100.1  
Poptr1|663278  
Poptr1|580083  
AT4G03153.1,AT1G03470.1,AT2G47920.1,AT1G09720.1,AT5G10500.1  
Poptr1|651799,Poptr1|558947,Poptr1|563292,Poptr1|551665,Poptr1|572748,Poptr1|554704,Poptr1|573510,Poptr1|729257  
AT2G22560.1  
AT1G58210.1  
AT1G24020.1 Poptr1|566333  
AT1G70830.1,AT1G70840.1,AT1G70850.1,AT1G23130.1,AT1G70890.1,AT5G28000.1,AT5G28010.1,AT1G70880.1  
Poptr1|658759  
AT1G35260.1,AT1G35310.1  
Poptr1|58305,Poptr1|701751

Poptr1|719864  
 AT2G04038.1,AT1G13600.1 Poptr1|60360,Poptr1|566729,Poptr1|590335,Poptr1|564461  
 AT5G60830.1 Poptr1|574886  
 AT5G15830.1  
 AT5G38800.1,AT3G30530.1  
 AT1G68880.1  
 AT5G08141.1  
 AT1G33970.1 Poptr1|665703,Poptr1|740763  
 AT1G33870.1,AT1G33890.1,AT1G33930.1,AT1G33830.1,AT1G33910.1,AT1G33900.1,AT1G33950.1,AT2G26820.1,A  
 T1G33960.1  
 AT4G09940.1,AT4G09950.1,AT4G09930.1  
 AT5G47270.1  
 AT1G33880.1  
 AT1G17220.1 Poptr1|687627,Poptr1|65689  
 AT4G11160.1 Poptr1|709213  
 Poptr1|350311  
 Poptr1|350312  
 AT1G23420.1 Poptr1|566056,Poptr1|354801  
 AT2G45190.1 Poptr1|646464,Poptr1|671215,Poptr1|663774,Poptr1|644314  
 AT1G69180.1 Poptr1|353953  
 AT2G26580.1 Poptr1|652803,Poptr1|736552  
 AT4G00180.1  
 Poptr1|640733  
 Poptr1|701436  
 AT1G20220.1,AT1G76010.1 Poptr1|347105  
 Poptr1|642907,Poptr1|652132  
 Poptr1|559398  
 Poptr1|645393  
 Poptr1|642908  
 AT5G67380.1,AT3G50000.1 Poptr1|684971,Poptr1|716327  
 AT2G23070.1 Poptr1|716331,Poptr1|693602  
 AT2G23080.1  
 Poptr1|551798  
 AT4G16830.1 Poptr1|551961,Poptr1|646158,Poptr1|702871,Poptr1|740195  
 AT4G17520.1,AT5G47210.1  
 AT3G15560.1 Poptr1|343331,Poptr1|671573,Poptr1|640657  
 AT3G15550.1  
 AT4G20030.1 Poptr1|553852  
 AT2G16990.1,AT2G16970.1,AT2G16980.2 Poptr1|697163,Poptr1|713396,Poptr1|715555,Poptr1|693002  
 AT3G20930.1 Poptr1|698806,Poptr1|353265  
 AT5G42210.1  
 Poptr1|353264  
 Poptr1|586243  
 AT1G07620.1 Poptr1|549175  
 AT4G35920.1,AT2G17780.1 Poptr1|689690  
 Poptr1|567228  
 AT2G33100.1 Poptr1|48556,Poptr1|350683  
 AT5G05170.1 Poptr1|697507,Poptr1|691465  
 AT4G23990.1,AT4G24000.1,AT4G24010.1 Poptr1|554513,Poptr1|705526,Poptr1|350373  
 AT4G18780.1 Poptr1|555650,Poptr1|568682  
 AT2G21770.1,AT4G39350.1 Poptr1|71761,Poptr1|695949,Poptr1|551308,Poptr1|714760  
 AT4G32410.1 Poptr1|702007,Poptr1|344723,Poptr1|582479  
 AT2G32620.1,AT4G15290.1,AT2G32530.1,AT4G15320.1,AT2G32540.1,AT2G32610.1  
 Poptr1|684214,Poptr1|572982  
 AT1G55850.1 Poptr1|550222,Poptr1|560094  
 AT1G02730.1 Poptr1|552489,Poptr1|700418  
 AT3G03050.1,AT5G16910.1 Poptr1|703843,Poptr1|573858  
 AT5G44030.1 Poptr1|691997  
 AT5G17420.1 Poptr1|717646,Poptr1|578717  
 AT5G09870.1,AT5G64740.1  
 AT2G25540.1  
 Poptr1|560520,Poptr1|576348  
 Poptr1|583563  
 Poptr1|554512,Poptr1|350372  
 Poptr1|698018  
 Poptr1|97727  
 Poptr1|597629  
 Poptr1|640907  
 Poptr1|572992  
 Poptr1|343986  
 Poptr1|569277  
 Poptr1|554065,Poptr1|590064  
 Poptr1|550454  
 Poptr1|569380  
 AT4G24470.1 Poptr1|692590,Poptr1|558987  
 AT3G21175.1,AT1G51600.1 Poptr1|687431  
 Poptr1|577294,Poptr1|643943,Poptr1|562360,Poptr1|72172  
 Poptr1|577295,Poptr1|562361  
 Poptr1|586229  
 AT1G28300.1 Poptr1|580920,Poptr1|555780  
 AT3G26790.1 Poptr1|707114,Poptr1|597091  
 AT3G12390.1 Poptr1|560323,Poptr1|682024



AT3G49470.1 Poptr1|574643  
AT5G13850.1  
AT4G10480.1,AT1G33040.1  
Poptr1|345775,Poptr1|104734  
AT4G32330.1,AT2G25480.1 Poptr1|654148,Poptr1|578210  
AT2G35880.1 Poptr1|667581,Poptr1|653406  
Poptr1|658207  
Poptr1|590028  
AT1G44170.1 Poptr1|685296,Poptr1|342410  
AT4G34240.1 Poptr1|51694,Poptr1|97859  
AT4G36250.1 Poptr1|563236  
Poptr1|585706  
Poptr1|706286  
AT4G26120.1,AT1G64280.1 Poptr1|717192  
AT4G19660.1,AT5G45110.1 Poptr1|72724,Poptr1|575566,Poptr1|690541,Poptr1|711056  
Poptr1|677358,Poptr1|705524,Poptr1|666831  
Poptr1|593168  
Poptr1|590204,Poptr1|589746  
AT5G60020.1 Poptr1|64839,Poptr1|55967,Poptr1|548008,Poptr1|568910,Poptr1|579478  
AT2G40370.1 Poptr1|696763,Poptr1|724380,Poptr1|724385,Poptr1|656305  
AT5G48100.1 Poptr1|559459,Poptr1|705531  
AT2G38080.1 Poptr1|64298,Poptr1|653089,Poptr1|557962,Poptr1|351881  
AT4G39830.1 Poptr1|567075,Poptr1|71677,Poptr1|654817  
AT2G30210.1 Poptr1|574533,Poptr1|571858  
AT5G21100.1,AT5G21105.1 Poptr1|683792,Poptr1|721359  
AT1G18140.1 Poptr1|569758,Poptr1|574985  
AT2G46570.1 Poptr1|57096  
AT3G09220.1 Poptr1|576885,Poptr1|592533,Poptr1|560853  
AT2G29130.1  
AT5G05390.1  
AT5G09360.1  
AT5G58910.1  
AT5G01190.1  
AT5G07130.1  
AT5G01040.1,AT5G01050.1  
Poptr1|695418  
Poptr1|568912,Poptr1|579475  
Poptr1|685735  
Poptr1|641167,Poptr1|592484  
Poptr1|586004  
Poptr1|591290  
Poptr1|698530,Poptr1|720063  
Poptr1|735738  
Poptr1|65827  
Poptr1|569222  
Poptr1|574983  
Poptr1|677566  
Poptr1|105565  
AT3G05060.1,AT5G27120.1 Poptr1|687955  
AT3G12860.1,AT1G56110.1 Poptr1|570234,Poptr1|575324  
AT5G25220.1,AT5G11060.1 Poptr1|352975,Poptr1|689058  
AT1G62990.1 Poptr1|691170  
AT4G32040.1  
Poptr1|738080,Poptr1|653520  
Poptr1|672778  
AT1G52700.1,AT3G15650.1 Poptr1|640642,Poptr1|685512,Poptr1|693726,Poptr1|58547  
AT5G20060.1  
AT1G52470.1,AT1G52460.1,AT1G52440.1  
AT1G52695.1  
AT1G51300.1  
AT1G47786.1,AT1G47780.1  
AT1G64160.1,AT4G23690.1 Poptr1|548385,Poptr1|646698  
AT4G11210.1,AT4G11180.1,AT4G11190.1  
Poptr1|640411,Poptr1|640410,Poptr1|691098,Poptr1|554440,Poptr1|711753,Poptr1|554436  
Poptr1|554437  
AT4G17300.1 Poptr1|718334,Poptr1|594529  
AT5G56680.1,AT1G70980.1 Poptr1|582977,Poptr1|695309  
AT3G07420.1 Poptr1|684138  
AT5G38750.1  
AT1G68420.1  
AT2G45830.1,AT3G61270.1 Poptr1|731072  
AT1G07220.1 Poptr1|64256  
AT3G48980.1,AT5G23850.1  
AT2G45840.1  
Poptr1|586418  
AT1G67400.1 Poptr1|697918,Poptr1|565036  
AT1G03620.1 Poptr1|571760  
AT3G60260.1,AT2G44770.1 Poptr1|551965,Poptr1|591762  
AT3G03610.1 Poptr1|571309  
AT3G43400.1  
Poptr1|569036  
AT5G66200.1 Poptr1|679130

AT4G34940.1 Poptr1|546711,Poptr1|649250  
AT3G26600.1 Poptr1|687051  
AT4G36030.1 Poptr1|593610,Poptr1|575225,Poptr1|345953  
Poptr1|582641  
AT2G28190.1 Poptr1|99154  
AT5G18100.1 Poptr1|729961,Poptr1|665465  
AT1G08830.1 Poptr1|570930,Poptr1|595511  
Poptr1|721328  
Poptr1|585000  
AT1G20750.1,AT1G79950.1,AT1G20720.1 Poptr1|594080,Poptr1|548679,Poptr1|550758,Poptr1|553709  
AT2G05635.1 Poptr1|108325  
AT4G28220.1 Poptr1|730525  
AT4G05020.1,AT4G21490.1 Poptr1|660452,Poptr1|694032  
AT1G32220.1 Poptr1|346265  
AT5G10730.1 Poptr1|737479,Poptr1|344787  
Poptr1|545675  
Poptr1|595815,Poptr1|353072,Poptr1|353070,Poptr1|353062  
Poptr1|585180  
Poptr1|353064  
AT2G34480.1 Poptr1|643366,Poptr1|544696,Poptr1|728108,Poptr1|647815  
AT3G14600.1  
AT1G29965.1 Poptr1|674082,Poptr1|595970,Poptr1|584490  
AT2G40810.1,AT3G56440.1 Poptr1|704215  
AT3G62770.2 Poptr1|730668  
AT5G05150.1 Poptr1|581867,Poptr1|729565  
AT1G67570.1 Poptr1|570221  
AT2G21080.1 Poptr1|98480,Poptr1|100063  
AT1G50630.1,AT3G20300.1 Poptr1|65395  
AT4G22270.1,AT4G03820.2 Poptr1|720920  
AT5G17230.1 Poptr1|689661  
Poptr1|639664,Poptr1|711679,Poptr1|714897,Poptr1|555222  
Poptr1|545530,Poptr1|342320  
Poptr1|347024  
Poptr1|547627  
AT3G10230.1 Poptr1|652630,Poptr1|667325  
AT5G57030.1 Poptr1|653265  
Poptr1|594931,Poptr1|556844  
Poptr1|591312  
Poptr1|586534  
Poptr1|653266  
Poptr1|98298  
AT1G63690.1 Poptr1|712509  
AT2G43070.1 Poptr1|684205  
AT1G01650.1 Poptr1|692394  
AT1G05820.1 Poptr1|548453  
Poptr1|581829  
Poptr1|664694  
AT1G49740.1,AT3G19310.1 Poptr1|744317  
AT5G67130.1 Poptr1|719261,Poptr1|651090  
Poptr1|558874,Poptr1|719272  
Poptr1|722214  
AT1G07230.1 Poptr1|641078,Poptr1|697588  
AT3G48610.1 Poptr1|575372,Poptr1|570272  
Poptr1|705377  
AT2G36620.1,AT3G53020.1 Poptr1|589696,Poptr1|682052,Poptr1|591612,Poptr1|570470,Poptr1|734141,Poptr1|555988  
Poptr1|576537  
Poptr1|589695  
AT3G57810.2 Poptr1|583612,Poptr1|576306  
Poptr1|565891,Poptr1|354676  
Poptr1|563636,Poptr1|659996,Poptr1|698819  
ATCG00350.1,ATCG00340.1 Poptr1|102026  
Poptr1|588148  
Poptr1|562640  
Poptr1|558220  
Poptr1|577397  
Poptr1|558222  
Poptr1|584980  
Poptr1|583981  
Poptr1|578060  
Poptr1|588419  
Poptr1|558221  
Poptr1|556219  
Poptr1|678345  
Poptr1|556262  
AT3G48560.1 Poptr1|666677

Poptr1|575365  
Poptr1|662159  
Poptr1|587914  
AT5G26860.1 Poptr1|570716,Poptr1|581957  
AT5G47040.1 Poptr1|689465,Poptr1|704015  
AT3G05790.1  
AT3G05780.1  
Poptr1|590731  
Poptr1|107657  
AT3G58190.1 Poptr1|551062  
AT2G40470.1 Poptr1|571894,Poptr1|596941,Poptr1|574505  
AT2G45420.1 Poptr1|347871,Poptr1|572115  
AT3G11090.1 Poptr1|656281,Poptr1|659480  
AT2G30130.1 Poptr1|54593,Poptr1|720235,Poptr1|567225,Poptr1|64697  
AT3G47870.1 Poptr1|666365,Poptr1|345905  
AT3G26660.1,AT3G26620.1 Poptr1|570523,Poptr1|575746  
AT5G66870.1 Poptr1|76149,Poptr1|558839  
AT1G65620.1 Poptr1|656362,Poptr1|659394  
AT2G45410.1 Poptr1|347870,Poptr1|663819  
AT2G28500.1,AT1G07900.1 Poptr1|353428,Poptr1|698639  
AT3G13850.1 Poptr1|670521  
AT5G63090.1 Poptr1|666518,Poptr1|641633,Poptr1|662026  
AT1G31320.1 Poptr1|693334  
AT1G06280.1 Poptr1|582780,Poptr1|574365  
AT2G42430.1 Poptr1|52135,Poptr1|346867  
AT2G31310.1  
AT2G42440.1  
AT2G30340.1  
AT4G00220.1  
AT2G23660.1  
AT3G50510.1  
AT4G22700.1  
AT4G00210.1  
AT1G72980.1  
AT3G27940.1  
AT5G35900.1  
AT3G27650.1  
AT1G16530.1  
AT2G19820.1  
Poptr1|567390  
Poptr1|567806  
Poptr1|76148  
Poptr1|573102  
Poptr1|577952  
Poptr1|695987  
Poptr1|561656  
Poptr1|99959  
Poptr1|679638  
AT3G54880.1 Poptr1|567666,Poptr1|563695  
AT5G25360.1 Poptr1|654141,Poptr1|578207  
AT5G03440.1  
Poptr1|695507,Poptr1|578946  
Poptr1|691307  
AT5G04200.1 Poptr1|652499,Poptr1|576058  
AT1G79340.1,AT1G79330.1 Poptr1|567122,Poptr1|564149  
AT1G16420.1,AT1G79310.1  
AT1G79320.1  
AT1G20380.1,AT1G76140.1 Poptr1|715579,Poptr1|684669,Poptr1|73117  
Poptr1|642867  
Poptr1|642868  
Poptr1|670604  
Poptr1|642869  
AT4G03960.1 Poptr1|61074,Poptr1|568164  
AT3G02800.1,AT5G16480.1 Poptr1|596979  
AT1G05000.1,AT2G32960.1 Poptr1|552731,Poptr1|732326  
AT5G13500.1 Poptr1|683554,Poptr1|350881  
AT5G25265.1 Poptr1|561941,Poptr1|737293  
AT2G25260.1  
Poptr1|722678,Poptr1|64628  
Poptr1|586547  
AT5G18650.1 Poptr1|565361  
AT3G62970.1 Poptr1|572743  
AT5G25560.1 Poptr1|654056  
AT5G22920.1 Poptr1|558319,Poptr1|702769  
Poptr1|578132  
AT1G36050.1 Poptr1|685267,Poptr1|342472  
AT3G22290.1 Poptr1|576041,Poptr1|652474  
AT1G22200.1  
Poptr1|683753,Poptr1|685070  
AT4G27720.1 Poptr1|569605,Poptr1|574699  
AT1G64650.1 Poptr1|684833  
AT2G23093.1 Poptr1|693609

AT3G49310.1  
Poptr1|709057  
AT5G24490.1 Poptr1|732721,Poptr1|569684  
Poptr1|582424,Poptr1|108400,Poptr1|569653,Poptr1|104448,Poptr1|593253,Poptr1|109269,Poptr1|55613  
2,Poptr1|591442,Poptr1|591444  
Poptr1|586947,Poptr1|582827,Poptr1|355400  
Poptr1|596298  
AT5G43330.1,AT1G04410.1 Poptr1|564942,Poptr1|747123  
Poptr1|709908  
Poptr1|551995,Poptr1|347805  
Poptr1|591691  
AT5G03980.1 Poptr1|97756,Poptr1|97767,Poptr1|65922,Poptr1|596748,Poptr1|97757,Poptr1|570778  
AT1G54790.2 Poptr1|662785,Poptr1|742222  
AT5G45910.1 Poptr1|693969,Poptr1|586770  
AT3G48460.1 Poptr1|733517  
AT3G26430.1 Poptr1|354769  
AT4G01130.1 Poptr1|731252  
AT5G14450.1 Poptr1|691588  
AT1G56670.1,AT1G09390.1 Poptr1|690201  
AT3G05180.1  
AT1G31550.2,AT1G28610.2,AT2G27360.1,AT1G28570.1,AT1G28590.1,AT1G28640.1,AT1G28600.1,AT1G28650.1,A  
T1G28670.1,AT1G28660.1,AT1G28580.1  
AT1G67830.1  
AT3G27950.1  
AT3G62280.1  
Poptr1|103792  
Poptr1|711379  
Poptr1|670274  
Poptr1|103793  
Poptr1|699390  
Poptr1|593510,Poptr1|559234,Poptr1|63270,Poptr1|566000,Poptr1|551457,Poptr1|710388  
Poptr1|566001  
Poptr1|559236  
Poptr1|552578  
Poptr1|572566  
AT1G06900.1 Poptr1|571877  
AT2G41790.1 Poptr1|695541  
AT5G01440.1  
AT3G57460.1,AT3G57470.1  
AT5G16320.1,AT1G31814.1 Poptr1|552423  
AT5G48385.1 Poptr1|710332,Poptr1|573179  
AT4G00650.1 Poptr1|575499  
Poptr1|746807  
AT5G61060.1 Poptr1|685088  
AT3G18520.2 Poptr1|355610  
AT5G61050.1  
AT5G61070.1  
AT4G17390.1,AT4G16720.1 Poptr1|646125,Poptr1|676405,Poptr1|740725,Poptr1|551992,Poptr1|683213  
Poptr1|587404,Poptr1|674753  
Poptr1|671567  
AT4G35300.1 Poptr1|556762,Poptr1|595017  
AT3G51490.1  
Poptr1|550737,Poptr1|73193  
Poptr1|590002  
Poptr1|558756  
AT3G13050.1 Poptr1|744742,Poptr1|718063  
Poptr1|704855  
Poptr1|584531,Poptr1|584521  
AT3G44340.1,AT4G32640.1 Poptr1|595463,Poptr1|729791  
AT3G07100.1 Poptr1|55555,Poptr1|696892  
Poptr1|347244  
AT1G47870.1 Poptr1|550895  
AT5G22220.1 Poptr1|59865,Poptr1|54270  
Poptr1|73027  
Poptr1|716859  
AT5G60850.1 Poptr1|569900,Poptr1|574876  
AT1G29160.1,AT2G34140.1 Poptr1|555679,Poptr1|660784  
AT5G02460.1 Poptr1|696863,Poptr1|723300,Poptr1|560751,Poptr1|675622,Poptr1|64403  
AT1G47655.1 Poptr1|709866,Poptr1|740286  
AT4G24060.1,AT1G64620.1  
Poptr1|661556,Poptr1|700777,Poptr1|63376,Poptr1|348108,Poptr1|664142,Poptr1|712091  
AT1G21340.1 Poptr1|653391,Poptr1|643508,Poptr1|559345  
AT5G65590.1 Poptr1|651157,Poptr1|646238  
AT5G62940.1 Poptr1|575167,Poptr1|570095  
AT3G50410.1 Poptr1|563045,Poptr1|51831  
AT3G47500.1 Poptr1|567032,Poptr1|701841,Poptr1|694115  
AT3G21270.1,AT1G51700.1 Poptr1|678455  
AT4G21050.1  
AT3G55370.2  
AT2G28810.1,AT1G07640.3  
AT4G21080.1  
AT2G37590.1

AT4G21040.1  
AT4G00940.1  
AT3G45610.1,AT2G46590.2  
AT3G61850.1  
AT3G52440.1  
AT5G60200.1  
AT4G38000.1  
AT2G28510.1  
AT5G66940.1  
AT1G26790.1,AT1G69570.1  
AT5G39660.1  
AT5G62430.1  
Poptr1|571281,Poptr1|573985  
AT4G24740.1 Poptr1|700966  
AT4G32660.1 Poptr1|352831  
AT3G53570.1 Poptr1|576599,Poptr1|352524  
Poptr1|662070  
Poptr1|105531,Poptr1|662069  
Poptr1|726191  
Poptr1|565990  
AT5G13020.1 Poptr1|48465,Poptr1|351074  
AT2G44440.1 Poptr1|583281,Poptr1|697681  
AT3G12140.3  
Poptr1|561266  
AT2G06530.1 Poptr1|582924  
AT1G03950.1 Poptr1|692911  
Poptr1|681789  
Poptr1|561015  
AT4G02080.1 Poptr1|566791,Poptr1|720907  
AT3G62560.1  
Poptr1|103628,Poptr1|729440  
Poptr1|699698  
Poptr1|581949  
AT3G19160.1,AT1G68460.1 Poptr1|564538  
AT5G19040.1 Poptr1|354931  
AT4G24650.1  
AT1G25410.1  
AT3G23630.1  
Poptr1|556436,Poptr1|563685  
AT5G37400.1,AT5G37430.1,AT5G37920.1,AT5G37470.1,AT5G37410.1,AT5G37460.1,AT4G16530.1,AT5G37650.1,AT5G37420.1 Poptr1|581255  
AT2G03010.1  
AT5G52660.2 Poptr1|678595,Poptr1|556108,Poptr1|572303  
AT4G01280.2,AT1G01520.1  
Poptr1|692385  
AT3G29763.1,AT3G29765.1,AT1G19260.1,AT4G09660.1  
Poptr1|571487,Poptr1|592564,Poptr1|546734,Poptr1|349470  
AT1G41920.1,AT3G29450.1  
AT1G42710.1  
Poptr1|591286,Poptr1|593128,Poptr1|585247,Poptr1|72148  
Poptr1|595758,Poptr1|353449,Poptr1|577910,Poptr1|57788,Poptr1|573973,Poptr1|584048,Poptr1|65255,  
Poptr1|576716,Poptr1|573474,Poptr1|592776,Poptr1|348378,Poptr1|65055,Poptr1|584330,Poptr1|587621,Poptr1|591  
635,Poptr1|559460,Poptr1|568447,Poptr1|591143,Poptr1|595057,Poptr1|593553,Poptr1|62755,Poptr1|592460,Poptr1|  
574126,Poptr1|97024,Poptr1|592597,Poptr1|587223,Poptr1|593016,Poptr1|596895,Poptr1|106080  
Poptr1|587043,Poptr1|578056,Poptr1|586883,Poptr1|593068,Poptr1|578379,Poptr1|588701  
Poptr1|581525,Poptr1|102552,Poptr1|72502,Poptr1|580907,Poptr1|347786,Poptr1|593236,Poptr1|585736,  
Poptr1|574553,Poptr1|105285,Poptr1|545440,Poptr1|352330,Poptr1|106765,Poptr1|576623,Poptr1|568640,Poptr1|57  
9257,Poptr1|588780  
Poptr1|591131,Poptr1|71990,Poptr1|349583,Poptr1|593017,Poptr1|63954  
Poptr1|588316,Poptr1|580454  
Poptr1|576923  
Poptr1|582672  
Poptr1|574077  
AT1G22530.1 Poptr1|582166,Poptr1|740734,Poptr1|574236  
AT1G72160.1 Poptr1|592303,Poptr1|738782  
AT3G51670.1 Poptr1|58227  
AT1G30690.1 Poptr1|708068  
AT1G72150.1  
AT4G09160.1  
Poptr1|738167  
Poptr1|72889  
AT5G53400.1,AT4G27890.1 Poptr1|355281,Poptr1|732901  
Poptr1|590103,Poptr1|343510  
Poptr1|594044  
AT3G21430.1 Poptr1|697861  
AT5G27610.1,AT3G05380.2 Poptr1|570824,Poptr1|581845  
Poptr1|671601  
Poptr1|671600  
Poptr1|671599  
Poptr1|565739  
Poptr1|588650  
Poptr1|671644

AT5G51670.1 Poptr1|570566,Poptr1|666929  
 AT2G17360.1,AT5G58420.1,AT5G07090.1  
 Poptr1|570736,Poptr1|47715,Poptr1|577044,Poptr1|690073,Poptr1|341741  
 Poptr1|553052  
 AT1G76340.1 Poptr1|726076,Poptr1|565058  
 AT5G19980.1 Poptr1|746895  
 Poptr1|658156  
 AT3G10330.1 Poptr1|688724,Poptr1|695550  
 AT3G29380.1  
 AT3G57370.1  
 AT2G41630.1  
 AT4G10680.1  
 AT5G39230.1  
 Poptr1|584948,Poptr1|585171  
 Poptr1|57566  
 AT2G06990.1 Poptr1|560690  
 AT1G59760.1 Poptr1|742573  
 AT3G46960.1 Poptr1|723137  
 Poptr1|672810  
 AT1G76580.1,AT1G20980.1 Poptr1|346517  
 Poptr1|560022  
 Poptr1|560023  
 AT1G03090.2 Poptr1|559591  
 AT5G35360.1 Poptr1|695467,Poptr1|673504  
 Poptr1|670385  
 Poptr1|579908  
 Poptr1|108773  
 AT5G10250.1 Poptr1|718782,Poptr1|71638  
 AT1G03010.1 Poptr1|730684,Poptr1|57226  
 AT5G48800.1 Poptr1|645415  
 AT3G08570.1 Poptr1|577211  
 AT5G47800.1 Poptr1|560077  
 AT2G14820.1 Poptr1|557502,Poptr1|49321  
 AT3G44820.1 Poptr1|556931  
 AT1G67900.1 Poptr1|101806,Poptr1|345533  
 AT5G64330.1 Poptr1|75551  
 AT3G22104.1 Poptr1|59751,Poptr1|654565  
 AT1G52770.1,AT3G15570.1 Poptr1|349515,Poptr1|581566,Poptr1|548632  
 AT4G31820.1 Poptr1|702064,Poptr1|344768  
 AT4G37590.1 Poptr1|51875  
 AT2G30520.1 Poptr1|571926,Poptr1|574461  
 AT3G49900.1 Poptr1|72140  
 AT5G66560.1 Poptr1|71939,Poptr1|76214  
 AT1G30440.1 Poptr1|707560  
 AT2G47860.1  
 AT5G67385.1  
 AT3G08660.1  
 AT3G49970.1  
 AT3G26490.1  
 AT5G67440.1  
 AT2G23050.1  
 AT3G50840.1  
 Poptr1|570863  
 Poptr1|658265  
 Poptr1|566010  
 Poptr1|568381,Poptr1|544968  
 Poptr1|660645  
 AT1G60470.1 Poptr1|658324,Poptr1|565191  
 AT2G47180.1 Poptr1|552572,Poptr1|572572  
 AT1G09350.1,AT1G56600.1 Poptr1|744421,Poptr1|570688  
 AT1G60450.1  
 AT5G23790.1,AT4G26250.1  
 Poptr1|106463  
 Poptr1|353985,Poptr1|55348  
 Poptr1|570686  
 AT1G09730.1 Poptr1|72208,Poptr1|551658  
 Poptr1|577310,Poptr1|562372  
 AT3G09570.1,AT5G18520.1 Poptr1|701493,Poptr1|561523  
 AT5G42090.1 Poptr1|554569,Poptr1|48648  
 AT5G02630.1  
 Poptr1|56678  
 AT1G80280.1,AT1G15490.1 Poptr1|691207  
 AT3G55880.2,AT2G40095.1 Poptr1|345040  
 AT1G52750.1  
 Poptr1|595649  
 AT2G29390.1,AT1G07420.1 Poptr1|48995,Poptr1|723202  
 AT4G22756.1,AT4G12110.1 Poptr1|350114,Poptr1|743964  
 AT4G22753.1  
 Poptr1|688121  
 AT1G01790.1 Poptr1|347953,Poptr1|700210  
 AT4G00640.1  
 AT4G00630.1

AT5G53390.1 Poptr1|355282  
AT1G72110.1,AT2G38995.1,AT5G37300.1  
AT3G49200.1,AT3G49190.1,AT3G49210.1  
AT2G43255.1  
AT5G16350.1,AT5G22490.1,AT5G12420.1,AT5G53380.1  
Poptr1|549918  
AT1G43620.1 Poptr1|692792  
AT3G07020.1 Poptr1|700681,Poptr1|553122  
Poptr1|586182,Poptr1|714746  
AT2G36170.1,AT3G52590.1 Poptr1|574686,Poptr1|728795  
AT4G05320.2 Poptr1|679519,Poptr1|691451  
AT1G31340.1 Poptr1|694382  
AT3G62250.1,AT2G47110.1 Poptr1|733868,Poptr1|684249,Poptr1|731613,Poptr1|746989,Poptr1|547834  
AT1G65350.1  
AT5G37640.1  
AT4G02890.1  
AT5G03240.1  
AT3G09790.1  
AT5G20620.1  
AT1G11980.1  
AT1G23410.1  
Poptr1|595194,Poptr1|735338  
Poptr1|571493  
Poptr1|556631  
Poptr1|562287  
Poptr1|569086  
Poptr1|648070  
Poptr1|562862  
Poptr1|693069,Poptr1|714807  
Poptr1|577089  
Poptr1|590985  
AT1G55790.1,AT1G55800.1 Poptr1|582563,Poptr1|349973  
Poptr1|582319,Poptr1|652329  
Poptr1|569165,Poptr1|586881,Poptr1|674742,Poptr1|569166  
AT4G30110.1 Poptr1|695480  
AT4G30120.1,AT2G19110.1  
Poptr1|586147  
Poptr1|349319,Poptr1|587508  
Poptr1|579049  
AT5G43850.1 Poptr1|720930  
AT4G14716.1,AT2G26400.1,AT4G14710.2 Poptr1|720245  
Poptr1|698049  
AT4G33810.1,AT2G14690.1,AT4G33820.1 Poptr1|557520,Poptr1|557519,Poptr1|557521  
Poptr1|107606  
AT3G10420.2 Poptr1|725076  
AT1G73170.1  
AT1G33290.1  
AT5G11490.1 Poptr1|695029  
AT4G23460.1,AT4G11380.1 Poptr1|350257,Poptr1|709305  
Poptr1|576244,Poptr1|552321  
AT5G43950.1,AT1G04090.1 Poptr1|573374  
AT2G44260.2 Poptr1|583311,Poptr1|578536  
AT3G01880.1,AT3G01870.1  
AT2G44230.1  
Poptr1|553303  
AT1G80600.1 Poptr1|58315  
AT5G46180.1 Poptr1|698922  
Poptr1|71836  
Poptr1|705457  
Poptr1|586613  
AT1G61680.1 Poptr1|544960,Poptr1|544964,Poptr1|568379  
AT5G23960.1  
Poptr1|589170,Poptr1|574035,Poptr1|571729,Poptr1|597307,Poptr1|75916,Poptr1|702474,Poptr1|704110,  
Poptr1|597287,Poptr1|571451,Poptr1|559084,Poptr1|575250,Poptr1|588923  
AT1G48800.1,AT3G14490.1,AT1G66020.1,AT4G13300.1,AT1G31950.1,AT4G15870.1,AT4G13280.1,AT5G48110.1,A  
T3G14540.1,AT3G29410.1  
AT2G37140.1  
AT3G31415.1  
Poptr1|573694,Poptr1|559083,Poptr1|594075,Poptr1|587850,Poptr1|595756,Poptr1|597288  
Poptr1|694380,Poptr1|687634  
Poptr1|597016,Poptr1|75917  
AT3G05030.1,AT5G27150.1 Poptr1|570935,Poptr1|595505  
Poptr1|572747  
AT3G57410.1,AT2G41740.1 Poptr1|701385,Poptr1|351515  
AT4G30160.1 Poptr1|702162,Poptr1|580518  
AT2G29890.1 Poptr1|557937  
AT5G57320.1  
AT3G25530.1 Poptr1|732551  
AT1G17650.1 Poptr1|592783  
Poptr1|579673  
Poptr1|596159  
Poptr1|595946

AT1G07490.1,AT2G29125.1 Poptr1|549147,Poptr1|558044  
AT2G39705.1 Poptr1|659662,Poptr1|563919  
AT2G36985.1 Poptr1|589462  
AT5G59510.1  
AT3G53232.1  
Poptr1|646075,Poptr1|589832  
Poptr1|563707  
Poptr1|560550  
AT5G55160.1,AT4G26840.1 Poptr1|711518,Poptr1|664794,Poptr1|343015  
AT5G55170.1  
AT5G48710.1,AT5G48700.1  
AT5G55855.1  
Poptr1|665055  
AT4G08170.2 Poptr1|558969  
AT5G16760.1 Poptr1|356648,Poptr1|554032  
Poptr1|722456  
Poptr1|683134  
AT2G05710.1 Poptr1|692180  
AT4G35830.1 Poptr1|585679,Poptr1|593790  
AT4G26970.1  
AT5G54950.1  
Poptr1|670222,Poptr1|700559  
Poptr1|552811  
Poptr1|666916  
AT5G21060.3 Poptr1|594921  
Poptr1|556861  
AT4G09760.1 Poptr1|347084,Poptr1|555089,Poptr1|48492,Poptr1|559425  
AT2G26830.1 Poptr1|739609  
AT1G71697.1  
AT1G74320.1  
AT4G01995.1 Poptr1|348361  
AT1G64680.1 Poptr1|691037  
AT1G03055.1 Poptr1|710729  
Poptr1|554567  
AT2G31170.1 Poptr1|58576  
AT5G38830.1 Poptr1|698229  
AT3G56300.1  
Poptr1|590756  
Poptr1|354190  
Poptr1|564547  
AT3G07700.1 Poptr1|57350  
AT5G64940.1 Poptr1|562690  
Poptr1|650797  
Poptr1|578543  
Poptr1|650799  
Poptr1|558608  
AT4G38360.2 Poptr1|594993,Poptr1|54256  
AT1G77220.1 Poptr1|559339,Poptr1|551350  
AT1G23070.1 Poptr1|577825  
AT2G41380.1 Poptr1|695580,Poptr1|701330  
AT4G22530.1,AT5G10830.1 Poptr1|718621  
AT1G55450.1,AT3G61210.1,AT3G54150.1  
Poptr1|560418  
Poptr1|562508,Poptr1|558440,Poptr1|71560,Poptr1|562491  
Poptr1|562492  
Poptr1|592575  
AT1G34060.1,AT1G34040.1 Poptr1|710255  
AT4G24670.1 Poptr1|570115  
AT1G70560.1,AT1G23320.1 Poptr1|354790  
Poptr1|342345  
Poptr1|575217  
AT1G15250.1,AT3G16080.1,AT1G52300.1 Poptr1|712331,Poptr1|705727,Poptr1|668951  
Poptr1|580064  
Poptr1|654039  
AT5G01990.1 Poptr1|589605,Poptr1|577230  
AT1G71090.1 Poptr1|566524,Poptr1|564590  
Poptr1|545403,Poptr1|348855  
Poptr1|590687  
ATMG00860.1 Poptr1|105904,Poptr1|61614,Poptr1|75818,Poptr1|58890,Poptr1|103960  
Poptr1|53095,Poptr1|61238,Poptr1|104190,Poptr1|101658,Poptr1|103534,Poptr1|546613,Poptr1|104402,  
Poptr1|103727,Poptr1|107576,Poptr1|105628,Poptr1|563242,Poptr1|61222,Poptr1|60019,Poptr1|99988,Poptr1|67403  
6,Poptr1|101860,Poptr1|349391,Poptr1|344485,Poptr1|100093,Poptr1|103738,Poptr1|357116,Poptr1|343374,Poptr1|1  
05893,Poptr1|58556,Poptr1|355651,Poptr1|58209,Poptr1|60947  
Poptr1|583142  
Poptr1|586321  
Poptr1|109236,Poptr1|63778,Poptr1|106827,Poptr1|106000,Poptr1|107667,Poptr1|103668,Poptr1|106383  
Poptr1|354456  
AT3G22370.1,AT3G22360.1 Poptr1|732929,Poptr1|569498,Poptr1|355229  
AT1G32350.1 Poptr1|349997  
AT5G64210.1  
AT3G27620.1  
AT4G25740.1,AT5G52650.1 Poptr1|544727,Poptr1|595542,Poptr1|703325,Poptr1|570901



AT5G41520.1  
AT2G40490.1 Poptr1|702404  
AT3G14930.1 Poptr1|704980,Poptr1|568804  
Poptr1|357057  
AT4G14320.1,AT3G23390.1 Poptr1|698748,Poptr1|719050,Poptr1|46726  
AT5G56940.1 Poptr1|704840  
AT4G34620.1  
Poptr1|580421,Poptr1|590930,Poptr1|574426,Poptr1|574430  
AT5G59480.1 Poptr1|46330  
AT5G02230.1 Poptr1|685738  
AT2G32150.1 Poptr1|658536,Poptr1|564828  
Poptr1|574114,Poptr1|723234  
AT4G32940.1,AT2G25940.1 Poptr1|701900,Poptr1|653937  
AT1G62710.1 Poptr1|581223,Poptr1|693499  
Poptr1|344805  
Poptr1|563463  
AT3G62870.1,AT2G47610.1 Poptr1|683443,Poptr1|704761,Poptr1|673545  
Poptr1|677297,Poptr1|748480  
Poptr1|64986  
Poptr1|678912  
AT3G03910.1,AT5G18170.1 Poptr1|571209,Poptr1|702434  
AT5G07440.1 Poptr1|575509  
Poptr1|592241,Poptr1|592243  
Poptr1|552707  
Poptr1|676450  
AT3G26618.1,AT1G12920.1 Poptr1|548144,Poptr1|572832,Poptr1|554651  
AT5G47880.1  
Poptr1|646915  
Poptr1|63209  
Poptr1|104075  
Poptr1|350541  
AT2G28350.1 Poptr1|595068,Poptr1|54811,Poptr1|344901,Poptr1|687394  
AT1G77850.1 Poptr1|551517  
AT1G19850.1 Poptr1|652033  
AT5G62000.1 Poptr1|575450,Poptr1|699349  
AT4G23980.1 Poptr1|63398,Poptr1|342812,Poptr1|554511  
AT1G30330.2 Poptr1|698975,Poptr1|49364  
AT1G59750.1 Poptr1|704693,Poptr1|689910  
AT5G37020.1 Poptr1|545564,Poptr1|59628  
ATMG00940.1 Poptr1|72398  
AT2G33860.1 Poptr1|99943,Poptr1|713902  
AT4G30080.1  
AT1G35520.1,AT1G34410.1,AT1G35540.1,AT1G34390.1,AT1G35240.1,AT1G34310.1  
AT2G46530.3,AT3G61830.1  
AT1G34170.1  
AT1G43950.1  
Poptr1|585195  
Poptr1|559171  
Poptr1|72397  
Poptr1|642999  
Poptr1|652030  
Poptr1|642997  
Poptr1|642998  
Poptr1|693277,Poptr1|690970  
Poptr1|575420,Poptr1|575416  
Poptr1|573525,Poptr1|572751  
Poptr1|572407  
Poptr1|559533  
Poptr1|579085  
Poptr1|559532,Poptr1|710138  
Poptr1|669880  
Poptr1|596587,Poptr1|583448  
AT2G32030.1,AT2G32020.1 Poptr1|698063  
AT3G22560.1 Poptr1|593410  
Poptr1|593409  
Poptr1|562496,Poptr1|102263  
AT1G29310.1,AT2G34250.1 Poptr1|728286,Poptr1|585495  
AT1G78720.1  
AT2G20340.1 Poptr1|684124  
AT4G28680.1  
Poptr1|555516,Poptr1|571156  
Poptr1|102884  
AT4G31290.1 Poptr1|586352,Poptr1|672632  
AT1G44790.1 Poptr1|716636  
AT5G26220.1  
Poptr1|574481,Poptr1|571734,Poptr1|554059  
AT5G35620.1 Poptr1|565813,Poptr1|696355  
AT4G18040.1 Poptr1|660574  
AT5G18110.1 Poptr1|571197  
AT1G29590.1,AT1G29550.1  
AT5G55280.1 Poptr1|691804  
AT3G52750.1,AT2G36250.1 Poptr1|717445

Poptr1|721303,Poptr1|594979  
AT4G34555.1,AT2G21580.1,AT4G39200.1 Poptr1|648626,Poptr1|725419,Poptr1|649390  
AT2G16360.1  
Poptr1|655765  
Poptr1|595961  
AT1G11870.2 Poptr1|692641  
AT5G27470.1 Poptr1|694377  
Poptr1|109297  
Poptr1|72288  
Poptr1|562832  
Poptr1|597607  
AT3G14200.1 Poptr1|673229,Poptr1|646029  
AT2G41000.1 Poptr1|560275  
AT4G28480.1,AT2G20560.1 Poptr1|562178,Poptr1|594630,Poptr1|679661,Poptr1|580946,Poptr1|718246  
AT1G11040.1 Poptr1|559252,Poptr1|347233  
AT1G56300.1 Poptr1|690235,Poptr1|729451  
AT5G16650.1 Poptr1|56778,Poptr1|573992  
AT4G13830.2 Poptr1|691690,Poptr1|597063  
AT1G59725.1,AT1G10350.1 Poptr1|721130,Poptr1|721167  
AT1G72416.1  
AT5G01390.1,AT3G08910.1  
AT5G25530.1  
AT2G20550.1  
AT1G44160.1  
AT2G33735.1  
Poptr1|670794,Poptr1|654405,Poptr1|654406,Poptr1|654403,Poptr1|590821  
Poptr1|562175  
Poptr1|590820  
Poptr1|548742  
Poptr1|698197  
Poptr1|573995  
Poptr1|71672  
AT3G51660.1 Poptr1|653173,Poptr1|577083  
AT5G57170.1 Poptr1|652860  
AT5G01650.1 Poptr1|668121,Poptr1|688852  
Poptr1|579029  
Poptr1|668126,Poptr1|695361  
Poptr1|653170  
Poptr1|668130  
Poptr1|668125  
AT4G33890.1,AT2G14850.1 Poptr1|722388,Poptr1|549985  
AT4G31440.1 Poptr1|61207,Poptr1|98436,Poptr1|583151  
AT5G67410.1  
AT2G24530.1  
Poptr1|639756,Poptr1|343916  
AT5G15640.1,AT1G72820.1,AT5G26200.1 Poptr1|566898,Poptr1|696655,Poptr1|704749,Poptr1|556386  
Poptr1|577977,Poptr1|344601  
AT1G54400.1 Poptr1|571175,Poptr1|697018,Poptr1|573951  
AT5G04890.1  
AT5G23570.1 Poptr1|553448  
Poptr1|555134,Poptr1|585433,Poptr1|107547,Poptr1|555137,Poptr1|555135,Poptr1|555133,Poptr1|10417  
8  
Poptr1|545839,Poptr1|702355  
Poptr1|547736,Poptr1|350952,Poptr1|555131,Poptr1|547737  
Poptr1|555132  
AT5G17310.2,AT3G03250.1 Poptr1|592888  
Poptr1|641786,Poptr1|556097,Poptr1|673112  
Poptr1|648245,Poptr1|678880  
Poptr1|108336  
Poptr1|730118  
Poptr1|677974  
AT5G45470.1,AT5G45480.1,AT5G45540.1,AT5G45530.1 Poptr1|101932  
AT4G19090.1,AT5G45460.1,AT4G19080.1  
Poptr1|593172,Poptr1|105768,Poptr1|596412,Poptr1|560174,Poptr1|76293,Poptr1|102101,Poptr1|592966,  
Poptr1|593170,Poptr1|575535,Poptr1|351207,Poptr1|593062,Poptr1|593258,Poptr1|553623,Poptr1|575557,Poptr1|59  
5763,Poptr1|105448,Poptr1|575553,Poptr1|560168,Poptr1|575935,Poptr1|575537,Poptr1|560169,Poptr1|593538,Poptr  
r1|575474,Poptr1|351205,Poptr1|105513,Poptr1|581409,Poptr1|575539,Poptr1|102168,Poptr1|593257  
Poptr1|102102,Poptr1|351201,Poptr1|592150,Poptr1|593256,Poptr1|575554,Poptr1|593255,Poptr1|59242  
1,Poptr1|581737,Poptr1|355323,Poptr1|575556  
Poptr1|351190,Poptr1|351185,Poptr1|351189,Poptr1|351186,Poptr1|568018,Poptr1|355324,Poptr1|586650  
,Poptr1|562289  
Poptr1|560167  
Poptr1|591935  
AT3G24340.1,AT1G05480.1 Poptr1|591759  
AT2G16390.1 Poptr1|556506  
AT2G21450.1  
Poptr1|592433  
Poptr1|546108  
AT2G19480.1 Poptr1|695331  
AT4G26110.1,AT5G56950.1  
AT3G13782.1  
Poptr1|553454,Poptr1|592782

Poptr1|595945,Poptr1|579147  
AT1G16710.1,AT1G79000.1 Poptr1|704461  
AT3G12980.1  
AT1G16705.2  
Poptr1|581105  
Poptr1|556155  
AT5G06600.1,AT3G11910.1 Poptr1|561195,Poptr1|697021,Poptr1|687444,Poptr1|576436  
Poptr1|584170  
AT1G21650.1 Poptr1|551406  
Poptr1|671073  
AT4G02930.1 Poptr1|572801,Poptr1|552665  
AT4G20360.1 Poptr1|640547,Poptr1|646557  
Poptr1|106939  
Poptr1|590508  
AT4G02780.1 Poptr1|346976,Poptr1|559559  
AT1G61120.1 Poptr1|545037  
Poptr1|593291  
AT1G68830.1 Poptr1|566670  
AT5G01920.1 Poptr1|561000  
Poptr1|656771  
Poptr1|720664  
AT5G65110.1 Poptr1|694321,Poptr1|695895  
AT1G06290.1,AT1G06310.1 Poptr1|574369,Poptr1|690298  
AT3G06690.1  
Poptr1|105302  
AT5G59000.1 Poptr1|723171,Poptr1|706067,Poptr1|653060  
AT5G05830.1 Poptr1|659590,Poptr1|696818  
Poptr1|58156,Poptr1|747318  
AT3G50950.1 Poptr1|679204  
AT5G38900.1 Poptr1|745715  
AT1G50180.1,AT1G58400.1,AT1G53350.1,AT1G59124.1,AT1G58390.1,AT1G58848.1,AT5G43470.1,AT5G48620.1,AT1G59780.1,AT1G59218.1,AT5G35450.1,AT1G58807.1,AT1G59620.1,AT1G10920.1,AT1G58410.1  
Poptr1|554587,Poptr1|585803,Poptr1|350440,Poptr1|597405  
AT5G04720.1,AT1G33560.1,AT4G33300.1 Poptr1|703092,Poptr1|710696  
AT3G14470.1  
Poptr1|549273,Poptr1|562169,Poptr1|581641,Poptr1|553710,Poptr1|547802,Poptr1|647281,Poptr1|67684  
6,Poptr1|585136,Poptr1|101480,Poptr1|549271  
AT3G07040.1 Poptr1|578339,Poptr1|348512,Poptr1|590080  
AT3G46730.1,AT3G46710.1,AT3G46530.1  
AT1G58602.1  
AT3G26470.1  
AT3G14460.1  
Poptr1|560178,Poptr1|569041  
Poptr1|571185  
Poptr1|574520  
Poptr1|103227,Poptr1|552860,Poptr1|553498,Poptr1|552972,Poptr1|570123,Poptr1|552852,Poptr1|10161  
1,Poptr1|595963,Poptr1|553042,Poptr1|589727,Poptr1|552974  
Poptr1|570118,Poptr1|658293  
Poptr1|588246,Poptr1|583413,Poptr1|581653  
Poptr1|570636  
Poptr1|596321,Poptr1|597358,Poptr1|579740  
Poptr1|579651  
Poptr1|588243  
Poptr1|587930  
Poptr1|594261  
Poptr1|555196  
Poptr1|591367,Poptr1|594638,Poptr1|555000,Poptr1|356413,Poptr1|574187,Poptr1|647269,Poptr1|54783  
3,Poptr1|553401,Poptr1|587936,Poptr1|100043,Poptr1|355498,Poptr1|583118,Poptr1|350849,Poptr1|705237,Poptr1|3  
48748,Poptr1|570635,Poptr1|348750,Poptr1|105745,Poptr1|570632,Poptr1|574186,Poptr1|587929,Poptr1|343097,Pop  
tr1|100762,Poptr1|356411,Poptr1|575618,Poptr1|587926,Poptr1|552881,Poptr1|100053,Poptr1|587934,Poptr1|59353  
6,Poptr1|100757,Poptr1|584409,Poptr1|552863,Poptr1|588191,Poptr1|357182,Poptr1|350841,Poptr1|570629,Poptr1|5  
87932  
Poptr1|100058,Poptr1|594920,Poptr1|99764,Poptr1|645150,Poptr1|590403,Poptr1|595138,Poptr1|571956,  
Poptr1|585633,Poptr1|348711,Poptr1|552976,Poptr1|681728,Poptr1|552971,Poptr1|588879  
Poptr1|585617,Poptr1|645193,Poptr1|594973,Poptr1|348707,Poptr1|104568,Poptr1|594940,Poptr1|10337  
5,Poptr1|552978,Poptr1|99769,Poptr1|590710,Poptr1|99768,Poptr1|597519,Poptr1|97986,Poptr1|357186,Poptr1|5935  
33,Poptr1|573944,Poptr1|109029,Poptr1|585619,Poptr1|571047,Poptr1|660243  
Poptr1|103636,Poptr1|100753,Poptr1|98448,Poptr1|594748,Poptr1|592871,Poptr1|591361,Poptr1|592866,  
Poptr1|562056,Poptr1|348698,Poptr1|552938,Poptr1|578293,Poptr1|590214,Poptr1|595962,Poptr1|583134,Poptr1|10  
2426,Poptr1|588843,Poptr1|569471,Poptr1|592824,Poptr1|595099,Poptr1|594256  
Poptr1|107946,Poptr1|592870,Poptr1|555021,Poptr1|584667,Poptr1|581295,Poptr1|592863,Poptr1|10459  
5,Poptr1|596903,Poptr1|552882,Poptr1|557585,Poptr1|582510,Poptr1|645152,Poptr1|593284  
Poptr1|589703,Poptr1|747319  
Poptr1|549272,Poptr1|557827  
Poptr1|62940  
Poptr1|705525,Poptr1|106951  
Poptr1|545461  
Poptr1|562060,Poptr1|679724  
Poptr1|591362,Poptr1|100754  
Poptr1|552879,Poptr1|357190,Poptr1|592518,Poptr1|356415  
Poptr1|107655  
Poptr1|106331

Poptr1|587931,Poptr1|109046,Poptr1|547778  
Poptr1|102047  
Poptr1|587801  
Poptr1|592896  
Poptr1|102693  
Poptr1|592903  
Poptr1|593240,Poptr1|590077,Poptr1|592671,Poptr1|590079,Poptr1|588244,Poptr1|581659,Poptr1|59345  
5,Poptr1|590084,Poptr1|102574,Poptr1|583412,Poptr1|349952,Poptr1|349951,Poptr1|588236  
Poptr1|590083,Poptr1|595586,Poptr1|104819,Poptr1|595584,Poptr1|672173  
Poptr1|580722  
Poptr1|102576  
Poptr1|562288  
Poptr1|354789  
Poptr1|555197,Poptr1|356707  
Poptr1|573113  
Poptr1|100974  
Poptr1|101270  
AT5G09420.1 Poptr1|548801  
AT1G08980.1 Poptr1|662772  
Poptr1|705627  
Poptr1|676919  
AT1G68370.1 Poptr1|723721,Poptr1|564551  
AT1G24120.1 Poptr1|657565  
AT1G59980.1  
Poptr1|721140  
AT4G14990.1,AT3G22270.1 Poptr1|576006,Poptr1|560243  
AT1G79090.1 Poptr1|550538  
Poptr1|103986,Poptr1|585016  
Poptr1|106579  
Poptr1|699177  
AT4G38600.1 Poptr1|713324  
Poptr1|721710,Poptr1|648784  
Poptr1|721711  
Poptr1|721707  
Poptr1|648786  
AT1G11360.1 Poptr1|568329  
AT5G54430.1,AT4G27320.1 Poptr1|568987,Poptr1|60635  
Poptr1|702640,Poptr1|571831  
AT2G18020.1,AT4G36130.1 Poptr1|46998,Poptr1|593862  
AT3G51190.1  
Poptr1|665958  
Poptr1|582809  
Poptr1|584328  
AT5G24520.1 Poptr1|569681,Poptr1|574635  
AT1G12910.1 Poptr1|572829,Poptr1|644973,Poptr1|747851  
AT3G26640.1  
Poptr1|576561,Poptr1|352487  
Poptr1|677036  
AT1G34320.1 Poptr1|574304,Poptr1|689611  
AT1G30755.1 Poptr1|685441  
AT5G08660.1  
Poptr1|574305  
Poptr1|65186  
Poptr1|642950  
AT5G04280.1 Poptr1|687403,Poptr1|655849  
AT5G06210.1 Poptr1|653699  
AT4G36960.1 Poptr1|651076,Poptr1|696028  
AT3G07810.2 Poptr1|342995,Poptr1|732394,Poptr1|344017  
AT3G13224.2 Poptr1|691842  
AT2G33410.1 Poptr1|573400,Poptr1|354608,Poptr1|343217,Poptr1|565807  
AT1G58470.1 Poptr1|572005,Poptr1|347555  
AT4G13850.1,AT3G23830.1 Poptr1|742773,Poptr1|679310,Poptr1|707174  
AT5G54580.1 Poptr1|663318,Poptr1|687614  
AT3G08000.1 Poptr1|573002  
AT1G17640.1 Poptr1|592784  
AT1G73530.1 Poptr1|569413  
AT3G26420.1 Poptr1|705680  
AT1G60650.1  
AT5G47620.1  
AT4G14300.1  
AT2G37510.1  
Poptr1|550162,Poptr1|568529  
Poptr1|549204  
Poptr1|348596  
Poptr1|582442  
Poptr1|580615  
AT1G31730.1 Poptr1|596858  
AT1G60070.1 Poptr1|701566,Poptr1|351838  
AT1G23940.1,AT1G23900.1  
AT2G27020.1 Poptr1|558179,Poptr1|548687  
AT3G22110.1 Poptr1|717587,Poptr1|575966  
AT5G56490.1,AT2G46750.1,AT2G46740.1,AT1G32300.1,AT2G46760.1 Poptr1|342840,Poptr1|342841

AT5G56470.1  
AT2G46600.1 Poptr1|572427  
AT4G27280.1,AT5G54490.1 Poptr1|582029,Poptr1|571841,Poptr1|574558,Poptr1|569032,Poptr1|587571  
Poptr1|582064,Poptr1|568990,Poptr1|568330,Poptr1|581154,Poptr1|568989,Poptr1|555416  
Poptr1|596676  
AT4G08350.1,AT2G34210.1 Poptr1|721868,Poptr1|713135  
AT4G08360.1  
Poptr1|648691,Poptr1|649321  
Poptr1|721870  
Poptr1|648692  
Poptr1|649322  
AT1G70190.1 Poptr1|349714  
AT3G06040.1 Poptr1|575168  
AT4G37660.1 Poptr1|596743  
AT4G36420.1  
AT2G03130.1  
AT1G19250.1 Poptr1|64898,Poptr1|589332  
AT5G45180.1  
Poptr1|73148,Poptr1|583637,Poptr1|556997  
Poptr1|102887  
Poptr1|581814  
AT2G37190.1,AT3G53430.1,AT5G60670.1 Poptr1|682272,Poptr1|584586,Poptr1|593270,Poptr1|683502  
Poptr1|107773  
AT2G47580.1 Poptr1|644766,Poptr1|57202  
AT3G16630.1 Poptr1|587322,Poptr1|565594  
AT1G06960.1,AT2G30260.1 Poptr1|702637  
AT4G15885.1  
Poptr1|348259  
Poptr1|593622  
AT5G17060.1,AT3G03120.1 Poptr1|571694,Poptr1|738606  
AT2G18390.1 Poptr1|655316  
AT5G37680.1 Poptr1|645212,Poptr1|714184  
AT2G24765.1 Poptr1|702093,Poptr1|654280  
AT5G67560.1,AT3G49870.1 Poptr1|697390,Poptr1|707441  
AT3G22950.1 Poptr1|699300,Poptr1|575805  
AT5G52210.1 Poptr1|575790,Poptr1|687859  
AT2G47170.1,AT3G62290.1 Poptr1|664306,Poptr1|644880,Poptr1|581645,Poptr1|570684  
AT3G49860.1  
AT1G70490.1,AT1G23490.1,AT1G10630.1  
AT5G14670.1  
Poptr1|580843  
Poptr1|737839  
Poptr1|65220  
AT2G36270.1 Poptr1|351746  
AT3G19290.1,AT1G49720.1 Poptr1|551849,Poptr1|744297,Poptr1|54505,Poptr1|591957  
AT1G45249.1  
AT5G42910.1  
AT4G34000.3  
AT3G20350.1,AT1G50660.1 Poptr1|55840  
AT1G64690.1 Poptr1|63340,Poptr1|554571  
AT1G11690.1  
Poptr1|544815  
AT5G56750.1 Poptr1|704584  
AT5G11790.1 Poptr1|561677,Poptr1|701919  
AT2G19620.1  
Poptr1|699824  
AT5G13260.1 Poptr1|708819,Poptr1|684802  
AT4G08630.1,AT5G23700.1,AT3G48860.2  
AT3G14180.1 Poptr1|62912,Poptr1|343873  
AT3G58630.1 Poptr1|554278,Poptr1|548550  
AT3G11100.1,AT5G05550.2 Poptr1|564061,Poptr1|567243  
AT1G54060.1  
AT5G11110.1 Poptr1|745681,Poptr1|58572,Poptr1|578888  
AT4G10120.1 Poptr1|56833  
AT5G20280.1  
AT3G20580.1,AT4G27110.1 Poptr1|571499  
AT3G16860.1,AT4G16120.1 Poptr1|697771  
AT5G49270.1  
Poptr1|572655  
AT3G51950.1 Poptr1|722961,Poptr1|64223,Poptr1|647251  
AT1G51520.2,AT3G21100.1 Poptr1|64224,Poptr1|557879  
AT3G63450.1  
AT5G12440.1  
AT1G51530.1  
Poptr1|675178  
AT1G26850.1 Poptr1|687116,Poptr1|696446  
AT1G04430.1,AT3G23300.1,AT4G14360.1 Poptr1|684610,Poptr1|715193  
AT1G31850.1 Poptr1|676655,Poptr1|693549  
AT2G43200.1 Poptr1|562285  
AT2G40280.1 Poptr1|724411  
AT4G18030.1 Poptr1|689471,Poptr1|690009  
AT3G10200.1,AT5G04060.1 Poptr1|560429

AT2G39750.1 Poptr1|563935,Poptr1|724641  
AT5G14430.1 Poptr1|49172  
AT1G13860.1,AT2G03480.1 Poptr1|566940  
AT4G00750.1 Poptr1|552120,Poptr1|688134  
AT3G51070.1 Poptr1|593886  
AT1G19430.1 Poptr1|691992  
AT5G64030.1 Poptr1|718612,Poptr1|51678  
AT4G19120.1  
AT3G56080.1  
AT1G77260.1  
AT5G06050.1  
AT3G03370.1  
AT1G78240.1  
AT2G45750.1  
AT2G34300.1,AT1G29470.1  
Poptr1|576517,Poptr1|687771  
Poptr1|594761  
Poptr1|588917  
Poptr1|104781  
Poptr1|570491  
Poptr1|76377  
Poptr1|76376  
Poptr1|561055  
AT3G56600.1,AT2G40850.1 Poptr1|344065  
AT1G13640.1,AT2G03890.1 Poptr1|659020,Poptr1|720820  
AT1G26270.1  
Poptr1|583874  
AT1G49470.1 Poptr1|673136,Poptr1|649490  
AT1G55240.1,AT1G55230.1 Poptr1|351037,Poptr1|547642,Poptr1|547641,Poptr1|555239  
AT5G19870.1  
AT1G26670.1 Poptr1|698390  
AT5G39510.1 Poptr1|556374,Poptr1|688954  
AT3G29100.1  
AT5G39630.1  
Poptr1|564252  
Poptr1|597722  
AT2G43040.1 Poptr1|710743  
AT1G27460.1 Poptr1|347585,Poptr1|572035  
AT4G28600.1 Poptr1|54970,Poptr1|645586,Poptr1|354603  
Poptr1|573405  
AT4G18390.1 Poptr1|555595,Poptr1|568415  
AT3G02150.2 Poptr1|680833,Poptr1|556378  
AT1G30210.1  
AT5G60970.1,AT5G08070.1  
AT4G00290.1 Poptr1|552196,Poptr1|572294  
AT4G00234.1  
Poptr1|588256  
AT2G39770.1 Poptr1|687344,Poptr1|656143  
AT3G55590.1  
Poptr1|560814  
Poptr1|576935,Poptr1|655658  
AT2G28420.1 Poptr1|54664  
AT1G15380.1,AT1G80160.1 Poptr1|640628,Poptr1|712435  
Poptr1|580048,Poptr1|583532,Poptr1|703769,Poptr1|696148,Poptr1|741175  
Poptr1|562230  
AT4G08685.1 Poptr1|682153,Poptr1|692676  
AT1G29140.1,AT5G45880.1,AT4G18596.1 Poptr1|583034,Poptr1|568820,Poptr1|107330  
AT1G78040.1  
Poptr1|53193,Poptr1|558559  
AT2G19570.1 Poptr1|681740,Poptr1|672427,Poptr1|653308  
AT4G29620.1,AT4G29610.1,AT4G29630.1,AT4G29640.1,AT4G29600.1  
AT4G29580.1,AT4G29570.1  
AT4G29650.1  
AT4G25835.1,AT5G57480.1 Poptr1|670616,Poptr1|578605  
AT2G46620.1 Poptr1|572434,Poptr1|552311  
AT3G28580.1,AT5G40010.1 Poptr1|648086,Poptr1|597305,Poptr1|555294  
AT1G43910.1 Poptr1|563207,Poptr1|593897  
AT2G18190.1,AT2G18193.1 Poptr1|719571,Poptr1|563200  
AT5G17730.1,AT5G17740.1,AT5G17760.1 Poptr1|356944  
AT3G50940.1,AT3G50930.1 Poptr1|76340  
AT4G30250.1  
AT3G28560.1,AT3G28510.1,AT3G28540.1,AT3G28520.1  
AT3G28600.1,AT3G28570.1,AT3G28610.1  
AT4G05340.1,AT4G05380.1  
AT4G05370.1  
AT5G17750.1  
AT3G29800.1  
Poptr1|98544  
Poptr1|732815,Poptr1|569610  
Poptr1|662988,Poptr1|702382  
Poptr1|555295,Poptr1|555289  
Poptr1|570011

Poptr1|356895,Poptr1|563281  
 Poptr1|563206,Poptr1|557226,Poptr1|697261,Poptr1|597544  
 Poptr1|568817,Poptr1|98355,Poptr1|550987  
 Poptr1|568818,Poptr1|354674  
 AT3G16050.1 Poptr1|548840  
 AT5G01410.1 Poptr1|560912,Poptr1|576973  
 AT2G38230.1  
 AT2G38210.1  
 AT1G14220.1,AT1G26820.1 Poptr1|686407,Poptr1|720331  
 AT2G39780.1 Poptr1|732579  
 AT1G14210.1  
 AT3G57080.1,AT2G41340.1 Poptr1|57931  
 AT3G54490.1 Poptr1|48513  
 AT3G22320.1 Poptr1|584052  
 AT3G16680.1  
 AT5G57980.1  
 Poptr1|350846  
 AT1G63850.1 Poptr1|48724,Poptr1|343647  
 AT2G13690.1 Poptr1|595375,Poptr1|562430  
 AT5G60050.1 Poptr1|64444  
 AT3G50780.1 Poptr1|76227,Poptr1|71926  
 AT5G67630.1 Poptr1|576773,Poptr1|689407  
 AT5G22330.1 Poptr1|689788  
 AT3G49830.1  
 Poptr1|556835  
 AT3G62240.1 Poptr1|572550,Poptr1|552589  
 AT2G47090.1  
 Poptr1|581617  
 Poptr1|353966  
 AT3G05975.1 Poptr1|668256,Poptr1|676208  
 AT3G54200.1 Poptr1|668257,Poptr1|589599  
 AT5G66030.1 Poptr1|71876  
 AT3G05350.1 Poptr1|570832  
 AT4G36760.1 Poptr1|686073  
 Poptr1|563106  
 Poptr1|674602,Poptr1|563107  
 Poptr1|573576,Poptr1|592526  
 Poptr1|586460  
 Poptr1|573571  
 AT4G16160.2 Poptr1|659054,Poptr1|656668  
 AT2G28900.1 Poptr1|691403  
 AT2G35840.1,AT1G51420.1 Poptr1|561178,Poptr1|735185  
 AT3G52340.1  
 Poptr1|563514  
 AT5G23750.1 Poptr1|662340,Poptr1|701188  
 AT3G61260.1,AT2G45820.1 Poptr1|688146,Poptr1|552155  
 AT3G48940.1  
 AT4G00670.1  
 Poptr1|554336,Poptr1|640516  
 AT3G14750.1 Poptr1|707867  
 AT5G61920.1 Poptr1|653642  
 AT1G67170.1 Poptr1|580750  
 Poptr1|584888  
 Poptr1|64695,Poptr1|557622  
 AT4G04900.1 Poptr1|544858  
 AT2G20430.1,AT4G28556.1 Poptr1|346818,Poptr1|559727,Poptr1|565783  
 AT2G33460.1,AT1G04450.1 Poptr1|354596  
 AT1G03982.1  
 AT3G23380.1  
 Poptr1|568202  
 AT5G19140.1 Poptr1|657667  
 AT5G43830.1 Poptr1|47258,Poptr1|720953  
 AT4G27450.1 Poptr1|728421,Poptr1|579495  
 AT3G22850.1  
 AT3G15450.1  
 Poptr1|580878,Poptr1|546469  
 AT5G65010.2,AT5G10240.1 Poptr1|715888  
 AT3G47340.1 Poptr1|697451,Poptr1|691509  
 AT3G46970.1 Poptr1|723127  
 AT3G29320.1 Poptr1|712800  
 Poptr1|713920  
 Poptr1|55374  
 Poptr1|564279  
 AT5G24910.1,AT5G24900.1 Poptr1|743896  
 AT3G14650.1,AT3G14610.1,AT3G14690.1,AT3G14630.1,AT3G14640.1,AT3G14680.1,AT3G14660.1  
 Poptr1|595797,Poptr1|99472,Poptr1|99468,Poptr1|100986,Poptr1|674662,Poptr1|99480  
 AT1G67110.1,AT5G38450.1 Poptr1|555847,Poptr1|743744  
 AT1G75130.1  
 Poptr1|703068,Poptr1|595588,Poptr1|740233,Poptr1|342634,Poptr1|585300,Poptr1|573239,Poptr1|55336  
 5  
 AT5G52400.1 Poptr1|346076,Poptr1|575832  
 AT2G26710.1 Poptr1|352119,Poptr1|100601

AT4G27710.1,AT2G46950.1,AT2G46960.2 Poptr1|351283  
AT3G14620.1  
AT1G17060.1  
Poptr1|353295  
Poptr1|588275,Poptr1|588267,Poptr1|673701,Poptr1|675410  
Poptr1|593973  
Poptr1|584921,Poptr1|588269  
Poptr1|673700  
Poptr1|350916  
Poptr1|584922  
Poptr1|595128  
Poptr1|587512  
Poptr1|589148,Poptr1|566769  
Poptr1|582758  
Poptr1|708434  
AT1G16520.1 Poptr1|719118  
AT4G15545.1 Poptr1|725794  
AT1G56080.1  
Poptr1|650945  
Poptr1|650946  
AT1G01090.1 Poptr1|348162  
AT1G59900.1 Poptr1|698009,Poptr1|657555  
AT1G24180.1  
AT2G24940.1 Poptr1|737400,Poptr1|341818  
AT3G48890.1 Poptr1|666994,Poptr1|570486  
AT5G52240.1  
Poptr1|733950  
AT4G14420.1 Poptr1|726372,Poptr1|715128  
AT5G43460.1,AT1G04340.1 Poptr1|726377  
AT3G23175.1  
AT3G23190.1  
AT3G23180.1  
Poptr1|643173  
Poptr1|673177  
AT5G50640.1,AT5G63490.1,AT5G50530.1 Poptr1|356071  
AT3G52950.1 Poptr1|718677  
AT2G36500.1  
Poptr1|650674  
AT3G11050.1 Poptr1|724397,Poptr1|686432  
AT2G40300.1,AT3G56090.1  
AT5G01600.1  
AT5G27770.1,AT3G05560.1 Poptr1|552449,Poptr1|662685,Poptr1|704404,Poptr1|664432  
AT1G02830.1  
Poptr1|587158,Poptr1|682538  
AT5G66050.1 Poptr1|593771  
AT1G75380.1,AT1G19660.1 Poptr1|643079,Poptr1|651965  
AT4G39640.1,AT4G39650.1 Poptr1|64926,Poptr1|558602  
AT4G29210.1  
AT1G69820.1  
Poptr1|109191  
Poptr1|588797  
AT1G27450.1 Poptr1|700137  
AT4G22570.1,AT4G12440.2 Poptr1|581239  
AT5G11160.1 Poptr1|737230,Poptr1|694977  
AT1G80050.1  
Poptr1|679044  
AT4G36010.1,AT2G17860.1 Poptr1|679124  
AT4G38670.1 Poptr1|697200  
AT1G73620.1,AT1G18250.2 Poptr1|699521,Poptr1|47709  
AT4G11650.1 Poptr1|709407,Poptr1|548446  
AT5G40020.1 Poptr1|668489  
AT1G75030.1,AT1G75050.1 Poptr1|591837  
AT1G75800.1,AT1G20030.2 Poptr1|559846,Poptr1|710655  
AT5G02140.1 Poptr1|653007  
AT1G77700.1 Poptr1|559199,Poptr1|643657,Poptr1|673336  
AT4G38660.1 Poptr1|713269,Poptr1|721766  
AT2G28790.1 Poptr1|706190,Poptr1|697660  
AT5G24620.1 Poptr1|57434,Poptr1|345783  
AT1G75040.1,AT1G19320.1  
AT2G24810.1  
Poptr1|669475,Poptr1|548498,Poptr1|747341  
Poptr1|548497  
Poptr1|551916  
Poptr1|594106  
Poptr1|677337,Poptr1|583370,Poptr1|357147,Poptr1|357135,Poptr1|583385,Poptr1|672749,Poptr1|64102  
1,Poptr1|583374,Poptr1|585256,Poptr1|583391,Poptr1|583379,Poptr1|679347,Poptr1|672756  
Poptr1|106192,Poptr1|106770,Poptr1|579656,Poptr1|546340  
Poptr1|555314  
Poptr1|591098  
Poptr1|680516,Poptr1|553438,Poptr1|48850  
Poptr1|550867  
AT5G27730.1 Poptr1|581881,Poptr1|699730



Poptr1|556656,Poptr1|557061,Poptr1|572645,Poptr1|554653  
Poptr1|63246  
Poptr1|104650  
AT1G74270.1,AT1G07070.1,AT3G55750.1 Poptr1|656186,Poptr1|682431,Poptr1|567324,Poptr1|659638  
AT1G41880.1  
AT5G16130.1,AT3G02560.1 Poptr1|670914,Poptr1|648028,Poptr1|688799,Poptr1|351797  
AT1G48830.1  
AT4G39080.1,AT2G21410.1 Poptr1|556518,Poptr1|686688  
Poptr1|52189,Poptr1|342198  
AT3G14075.1 Poptr1|693757  
AT4G16070.1 Poptr1|697801,Poptr1|689871  
Poptr1|592239  
AT1G34030.1,AT1G22780.1,AT4G09800.1 Poptr1|559418  
Poptr1|551290  
Poptr1|643293,Poptr1|651776  
Poptr1|551289  
AT5G35530.1,AT3G53870.1,AT2G31610.1 Poptr1|578006,Poptr1|653831,Poptr1|666414  
Poptr1|570052  
Poptr1|597047  
AT1G17720.1 Poptr1|592731,Poptr1|577933,Poptr1|597671,Poptr1|695086  
AT1G51690.1  
Poptr1|575190  
AT4G24990.1 Poptr1|687831,Poptr1|666717  
AT5G15460.1,AT3G01050.1 Poptr1|545916  
AT3G26980.1 Poptr1|707072,Poptr1|690535  
AT1G22050.1  
AT1G77870.1  
AT4G35290.1,AT2G17260.1 Poptr1|54246  
AT3G51480.1 Poptr1|558795,Poptr1|558796  
AT2G29110.1,AT2G29120.1,AT2G29100.1  
Poptr1|578359,Poptr1|101745,Poptr1|578352,Poptr1|578342,Poptr1|591165  
AT5G11180.1 Poptr1|353065  
AT2G32400.1 Poptr1|711342  
AT1G42540.1 Poptr1|559972,Poptr1|346558  
AT2G32390.1,AT1G05200.1 Poptr1|552797,Poptr1|572950  
AT5G48410.1,AT3G07520.1,AT3G04110.1,AT5G48400.2  
Poptr1|554007  
Poptr1|65567,Poptr1|591955,Poptr1|591952,Poptr1|65569,Poptr1|550284,Poptr1|550283,Poptr1|568762,  
Poptr1|65563,Poptr1|555720,Poptr1|545225,Poptr1|65570,Poptr1|693965,Poptr1|574361  
Poptr1|108701,Poptr1|353073,Poptr1|593999,Poptr1|578346,Poptr1|105839  
Poptr1|578647,Poptr1|594754  
Poptr1|561417,Poptr1|107332,Poptr1|99577  
Poptr1|76113,Poptr1|568759  
Poptr1|591355,Poptr1|568753,Poptr1|568752  
Poptr1|568757  
Poptr1|582774  
Poptr1|572952,Poptr1|572954  
AT2G04842.1 Poptr1|732407  
AT5G26830.1 Poptr1|686269  
AT1G18130.1  
AT1G17960.1  
Poptr1|589045  
AT1G70600.1,AT1G23290.1 Poptr1|561158,Poptr1|720999,Poptr1|726230,Poptr1|701442  
AT1G12960.1  
AT3G27150.1,AT5G40680.1 Poptr1|64944,Poptr1|597156  
AT5G60570.1 Poptr1|58931  
AT1G74510.1 Poptr1|97421  
AT2G02870.1,AT1G14330.1  
AT1G26930.1  
AT4G12560.1,AT4G22390.1 Poptr1|685870,Poptr1|575936  
AT3G23880.1 Poptr1|565298  
Poptr1|351184,Poptr1|547750  
Poptr1|563457,Poptr1|353136  
Poptr1|560283  
Poptr1|583700  
Poptr1|560159  
Poptr1|560163  
AT5G62310.1 Poptr1|346133  
AT5G58140.1 Poptr1|595043  
AT3G45780.1 Poptr1|691593  
AT2G26700.1 Poptr1|575329  
AT2G44830.1 Poptr1|347756,Poptr1|591775  
AT5G40030.1 Poptr1|577552  
AT3G25250.1,AT4G13000.1 Poptr1|553228  
AT3G27580.1 Poptr1|343985,Poptr1|57832,Poptr1|64806  
AT1G51170.1,AT3G20830.1 Poptr1|547888,Poptr1|554961  
AT3G44610.1 Poptr1|721502,Poptr1|594816  
AT1G16440.1,AT1G79250.1 Poptr1|55425,Poptr1|564144  
AT3G14370.1,AT1G53700.1 Poptr1|65686,Poptr1|569142  
AT2G20040.1 Poptr1|737642  
AT3G17850.1 Poptr1|733135,Poptr1|345788  
AT2G34650.1

AT5G47750.1  
AT4G26610.1,AT5G55910.1  
AT3G12690.1  
AT1G48490.1  
AT1G45160.1  
    Poptr1|721231  
    Poptr1|353278  
AT5G01220.1    Poptr1|560886,Poptr1|576936  
AT2G35110.1    Poptr1|575639  
    Poptr1|662488  
    Poptr1|596211,Poptr1|587889,Poptr1|662489,Poptr1|575636  
    Poptr1|587896,Poptr1|596002  
    Poptr1|669872,Poptr1|575637  
    Poptr1|575640,Poptr1|570617  
    Poptr1|596214  
AT2G33845.1    Poptr1|48138,Poptr1|687066,Poptr1|660899,Poptr1|696310  
AT4G28440.1    Poptr1|718224,Poptr1|594643  
AT1G23750.1  
AT1G10590.3  
AT1G03810.1  
AT1G76810.1,AT1G76720.1    Poptr1|687675,Poptr1|60279  
AT1G21160.1,AT1G76820.1,AT2G27700.1,AT1G76825.1  
    Poptr1|569066  
AT1G03370.1    Poptr1|690257,Poptr1|560079  
AT5G50170.1    Poptr1|700960  
AT5G42820.1,AT1G27650.1    Poptr1|684694,Poptr1|560016  
    Poptr1|556941,Poptr1|741666  
    Poptr1|676151  
AT1G67730.1    Poptr1|565952,Poptr1|341947  
    Poptr1|565101  
    Poptr1|565951  
AT4G20380.2    Poptr1|687655,Poptr1|642472  
AT1G32540.1    Poptr1|670410,Poptr1|740050  
AT4G21610.1    Poptr1|555804  
AT4G16380.1,AT1G51090.1    Poptr1|560230,Poptr1|560219,Poptr1|575885,Poptr1|590992,Poptr1|103346  
AT1G49420.1  
    Poptr1|590991,Poptr1|596281,Poptr1|579371,Poptr1|351250,Poptr1|585212,Poptr1|351264  
AT2G26640.1    Poptr1|561843,Poptr1|737124  
AT2G26250.1    Poptr1|561555  
AT2G28630.1,AT1G07720.1    Poptr1|558115,Poptr1|49037  
AT1G01120.1    Poptr1|57115,Poptr1|348148  
AT1G19440.1    Poptr1|573414  
AT1G68530.1,AT1G25450.1    Poptr1|656812,Poptr1|566626  
AT5G04530.1    Poptr1|665835,Poptr1|659771,Poptr1|588594  
AT1G71160.1    Poptr1|548746  
AT1G04220.1,AT5G43760.1    Poptr1|564905,Poptr1|566163  
AT2G46720.1,AT3G10280.1  
AT2G15090.1,AT4G34520.1,AT4G34250.1  
AT5G49070.1  
    Poptr1|106843  
    Poptr1|658448,Poptr1|581148  
    Poptr1|566167  
    Poptr1|351726  
    Poptr1|592169,Poptr1|592168  
    Poptr1|587394  
    Poptr1|546072,Poptr1|649406  
    Poptr1|666947  
    Poptr1|575722  
    Poptr1|592166,Poptr1|592171  
    Poptr1|656018  
    Poptr1|588598,Poptr1|588807  
    Poptr1|659769  
    Poptr1|570777  
    Poptr1|588631,Poptr1|566171,Poptr1|101178,Poptr1|747725  
    Poptr1|106935  
    Poptr1|551110,Poptr1|559624  
AT3G53000.1    Poptr1|59202  
AT1G63090.1,AT1G12710.1    Poptr1|709440,Poptr1|646561  
AT3G61060.2    Poptr1|575771,Poptr1|700187  
AT5G52120.1  
AT1G02840.1,AT4G02430.2    Poptr1|552437  
AT1G09140.1    Poptr1|581887,Poptr1|570781  
AT3G49430.1    Poptr1|732749,Poptr1|569616  
    Poptr1|664446  
AT2G25490.1    Poptr1|560600,Poptr1|736567,Poptr1|561896  
AT5G25350.1  
AT4G15475.1  
    Poptr1|737202  
AT2G16050.1    Poptr1|703585,Poptr1|556422,Poptr1|649475  
AT1G20990.1    Poptr1|73224  
    Poptr1|101235,Poptr1|353546  
AT3G57630.1    Poptr1|351560

AT2G27980.1 Poptr1|99164,Poptr1|558337  
AT2G36720.1 Poptr1|739611  
AT3G53680.1,AT2G37520.1 Poptr1|650404,Poptr1|351751,Poptr1|583008  
Poptr1|590716,Poptr1|589518  
AT5G14010.1 Poptr1|549753,Poptr1|593469  
AT5G25160.1,AT5G10970.1 Poptr1|547939,Poptr1|561966,Poptr1|554866  
Poptr1|576084,Poptr1|555101,Poptr1|585117,Poptr1|578878,Poptr1|351336  
Poptr1|583672  
AT1G10290.1,AT1G59610.1 Poptr1|583471,Poptr1|596773  
Poptr1|743875  
Poptr1|571595  
AT5G10390.1 Poptr1|747465  
AT4G40030.1 Poptr1|719701  
AT1G09200.1  
AT3G27360.1  
AT5G10400.1  
AT5G65360.1  
AT5G65350.1  
AT1G13370.1  
AT5G10980.1  
AT1G19890.1  
AT4G40040.1  
AT1G75600.1  
Poptr1|672228  
Poptr1|350773  
Poptr1|639900  
Poptr1|647216,Poptr1|595937  
Poptr1|647215  
Poptr1|554937  
Poptr1|62989  
Poptr1|715331  
Poptr1|47643  
Poptr1|654735  
Poptr1|710567  
Poptr1|715371  
Poptr1|593870  
Poptr1|643807  
Poptr1|650690  
AT3G17020.1 Poptr1|698313  
AT3G53990.1 Poptr1|576865,Poptr1|695401  
AT3G03270.1 Poptr1|556085,Poptr1|689670  
AT5G58000.1 Poptr1|578761,Poptr1|578759  
AT3G17550.1,AT1G43610.1,AT5G23470.1,AT1G20320.1,AT5G54210.1,AT2G04930.1,AT1G43600.1,AT3G19600.1,AT2G02290.1,AT3G15330.1  
AT3G50376.1  
Poptr1|352323  
AT5G47020.1 Poptr1|356564  
AT5G11700.1 Poptr1|695062  
AT4G32920.1  
Poptr1|597368,Poptr1|356560,Poptr1|579833  
Poptr1|589947  
Poptr1|577905  
AT1G75760.1,AT1G19970.1 Poptr1|556584,Poptr1|73035,Poptr1|721816,Poptr1|550886  
AT3G25160.1 Poptr1|349009  
AT4G38790.1,AT2G21190.1  
AT5G27200.1,AT3G05020.1 Poptr1|699798,Poptr1|595508  
AT4G25050.1 Poptr1|662211,Poptr1|575440  
AT1G54580.1,AT1G54630.1  
AT3G22550.1 Poptr1|597513,Poptr1|551155,Poptr1|566225,Poptr1|559572  
AT3G63210.1  
Poptr1|678921  
Poptr1|586054,Poptr1|550149  
AT2G43970.1 Poptr1|668302,Poptr1|718124  
AT3G19090.1 Poptr1|581475  
AT5G46250.1 Poptr1|568442  
Poptr1|668301  
AT1G27480.1 Poptr1|572020  
Poptr1|347567  
AT1G19630.1 Poptr1|346789  
AT3G50660.1 Poptr1|346415,Poptr1|719487  
AT5G05690.1 Poptr1|353665  
AT1G12740.1 Poptr1|554319,Poptr1|63589  
AT5G14400.1 Poptr1|688360,Poptr1|49178  
AT1G73340.1 Poptr1|585891  
AT2G42850.1 Poptr1|347058  
AT3G30180.1,AT5G38970.1 Poptr1|545973,Poptr1|690391  
AT3G19270.1 Poptr1|704322,Poptr1|703119  
AT3G13730.1 Poptr1|678468,Poptr1|703918  
AT4G36380.1 Poptr1|76364  
AT2G29090.1 Poptr1|723222,Poptr1|64359  
AT4G19230.2,AT5G45340.1 Poptr1|596860  
AT2G32440.1,AT1G05160.1 Poptr1|688380,Poptr1|571955

AT4G15310.1,AT3G44970.1,AT1G55940.1,AT5G48000.1,AT3G30290.1,AT4G15300.1,AT1G65670.1,AT4G15393.1,AT1G78490.1,AT4G15396.1  
Poptr1|72940  
Poptr1|577166  
Poptr1|353668  
Poptr1|659523  
Poptr1|748604,Poptr1|64586,Poptr1|102757,Poptr1|64587,Poptr1|549346,Poptr1|641396,Poptr1|594988,  
Poptr1|697487,Poptr1|556724  
Poptr1|594989  
Poptr1|580996  
Poptr1|550774  
Poptr1|747568  
Poptr1|64656  
Poptr1|551854  
Poptr1|678966  
Poptr1|551333  
Poptr1|589983  
Poptr1|580101  
Poptr1|355794  
AT1G08570.1 Poptr1|573891,Poptr1|730028  
AT4G26160.1 Poptr1|561086,Poptr1|704578  
AT5G61440.1  
AT2G33270.1  
AT4G29670.2  
AT5G64130.1 Poptr1|673566,Poptr1|745745  
AT4G16146.1 Poptr1|659041,Poptr1|354053  
AT1G69510.1 Poptr1|698403  
AT2G47620.1 Poptr1|575397  
AT2G33610.1 Poptr1|550727  
AT1G21700.1 Poptr1|559267  
AT5G65260.1 Poptr1|718737,Poptr1|558510  
AT5G51120.1 Poptr1|588178,Poptr1|575507  
AT5G10350.1  
Poptr1|691711,Poptr1|577383  
AT1G61010.1 Poptr1|577561  
AT2G01730.1 Poptr1|566435  
Poptr1|577563  
Poptr1|577562,Poptr1|103041,Poptr1|594672  
Poptr1|681397  
Poptr1|580706  
AT2G18790.1,AT4G16250.1 Poptr1|686362,Poptr1|723933  
AT1G09570.1 Poptr1|729311  
AT4G18130.1  
AT5G35840.1  
AT2G02970.1,AT1G14230.1 Poptr1|687269,Poptr1|353841  
AT1G14250.1,AT1G14240.1  
Poptr1|556869,Poptr1|594913  
AT5G14180.1 Poptr1|706967  
Poptr1|597152  
Poptr1|573027,Poptr1|732347  
Poptr1|573024  
AT1G20760.1 Poptr1|73172,Poptr1|346568  
AT1G21630.1 Poptr1|558791  
Poptr1|705246,Poptr1|105151  
Poptr1|586451  
AT4G24910.1 Poptr1|575363  
AT1G67330.1,AT1G27930.1 Poptr1|554785,Poptr1|548026  
AT1G09610.1 Poptr1|596760  
AT4G09990.1,AT1G33800.1 Poptr1|574206,Poptr1|689632  
AT1G71690.1  
Poptr1|570260  
AT3G22490.1,AT3G22500.1 Poptr1|680323  
AT5G53270.1,AT5G27980.1,AT5G53260.1,AT1G03120.1  
AT3G24590.1 Poptr1|737602  
AT1G06870.1,AT2G30440.1 Poptr1|740294  
Poptr1|595875  
Poptr1|673175  
Poptr1|568793  
Poptr1|571515  
AT3G44150.1 Poptr1|561165,Poptr1|576477  
AT3G11800.1  
AT3G48630.1  
AT2G18630.1 Poptr1|346430,Poptr1|655248  
AT4G34320.1 Poptr1|546652,Poptr1|54473  
AT5G66670.1,AT5G66675.1,AT5G66660.1  
AT4G34330.1  
AT3G57100.1  
AT3G28270.1  
Poptr1|563094,Poptr1|593981  
AT2G32580.1,AT1G05070.1 Poptr1|572985,Poptr1|692188  
AT2G24290.1,AT4G30996.1 Poptr1|738051,Poptr1|695234  
Poptr1|677344

Poptr1|595559,Poptr1|584706  
Poptr1|596379,Poptr1|579594,Poptr1|568070  
Poptr1|570890  
AT1G18560.1 Poptr1|355594  
AT5G56260.1 Poptr1|744843  
AT3G02770.1,AT5G16450.1 Poptr1|596968,Poptr1|738639  
Poptr1|578907,Poptr1|584802,Poptr1|578909,Poptr1|673686,Poptr1|101350  
AT4G21790.1 Poptr1|647588  
AT2G02180.1,AT1G14530.1 Poptr1|687125,Poptr1|721173  
Poptr1|567990  
Poptr1|568686  
AT1G32160.1 Poptr1|349936  
AT3G17800.1,AT1G48450.1 Poptr1|569371,Poptr1|704104  
AT5G48590.1,AT3G07310.1 Poptr1|553215  
Poptr1|595140  
Poptr1|349937  
Poptr1|553216  
AT3G03300.1 Poptr1|696753  
AT3G57190.1 Poptr1|351462  
AT5G20320.1 Poptr1|344471  
AT5G36170.1  
AT2G19390.1,AT4G29790.1 Poptr1|58468,Poptr1|352034  
AT5G22450.1 Poptr1|594983,Poptr1|556796  
Poptr1|596018  
Poptr1|561036  
Poptr1|353252  
AT5G38290.2 Poptr1|648034  
AT1G18440.1 Poptr1|682782  
AT5G19830.1 Poptr1|708279,Poptr1|547603  
AT5G16140.1  
Poptr1|581118  
AT3G54950.1,AT2G39220.1 Poptr1|567600,Poptr1|686535  
AT3G63200.1 Poptr1|551172,Poptr1|559556  
AT4G29800.1  
Poptr1|356403,Poptr1|575627  
AT5G53580.1 Poptr1|57451  
AT1G06690.1 Poptr1|714933,Poptr1|551201,Poptr1|714938  
Poptr1|563849  
Poptr1|569634  
AT5G44170.1 Poptr1|679655  
AT1G08125.1 Poptr1|723635  
AT1G54530.1 Poptr1|595457  
AT2G44310.1 Poptr1|583302  
Poptr1|645032,Poptr1|595697,Poptr1|645031,Poptr1|552716,Poptr1|582840,Poptr1|573043  
AT1G75680.1,AT1G19940.1 Poptr1|559819,Poptr1|692964  
AT1G70710.1,AT1G23210.1 Poptr1|720068,Poptr1|55208  
AT3G43860.1 Poptr1|344586  
AT5G49720.1 Poptr1|675657,Poptr1|683621  
AT4G09740.1,AT4G23560.1 Poptr1|48715  
AT4G02290.1 Poptr1|684274,Poptr1|688256  
AT1G71380.1,AT1G22880.1 Poptr1|60435  
AT1G64390.1 Poptr1|554485,Poptr1|63431  
AT1G65610.1 Poptr1|55432,Poptr1|696739  
AT2G32990.1 Poptr1|573005  
AT1G48930.1 Poptr1|562825  
AT4G24260.1  
AT3G42155.1  
AT1G02800.1  
AT2G44540.1,AT2G44550.1,AT2G44560.1,AT2G44570.1  
AT4G11050.1  
Poptr1|356897  
Poptr1|584680  
Poptr1|733972,Poptr1|575667  
Poptr1|104427  
Poptr1|578012  
Poptr1|559342  
Poptr1|347152  
Poptr1|670290  
Poptr1|49354  
Poptr1|348590  
Poptr1|552745,Poptr1|586718  
AT5G64440.1 Poptr1|691784  
Poptr1|75674,Poptr1|558478  
AT2G13290.1 Poptr1|344172,Poptr1|578921  
AT3G27540.1 Poptr1|49166  
AT1G67880.1,AT1G12990.1 Poptr1|565155,Poptr1|55040  
AT3G01620.1,AT5G14480.1  
AT3G26445.1  
AT1G20670.1,AT1G76380.2 Poptr1|559957,Poptr1|693031  
AT5G55040.1  
Poptr1|577228,Poptr1|595007,Poptr1|589607  
AT1G07080.1 Poptr1|557627

AT5G01580.1 Poptr1|735919  
 AT4G12900.1  
 AT4G12870.1  
     Poptr1|105466,Poptr1|579338,Poptr1|570351  
     Poptr1|560939,Poptr1|577027  
     Poptr1|641521  
 AT4G16155.1,AT3G16950.1 Poptr1|696620  
     Poptr1|566793  
 AT5G47700.1,AT1G01100.1,AT4G00810.1 Poptr1|661579,Poptr1|666054  
 AT3G49460.1  
     Poptr1|572464,Poptr1|552351  
 AT3G44590.1,AT2G27720.1,AT2G27710.1 Poptr1|703503,Poptr1|556974  
 AT3G28500.1,AT5G40040.1  
 AT1G58983.1,AT1G58684.1,AT2G41840.1,AT1G59359.1,AT3G57490.1,AT1G58380.1  
     Poptr1|652732,Poptr1|576349  
     Poptr1|549239  
 AT1G21680.1,AT1G21670.1,AT4G01870.1 Poptr1|65435  
     Poptr1|107834  
     Poptr1|587323,Poptr1|581001  
     Poptr1|565661,Poptr1|584221  
     Poptr1|108126  
     Poptr1|642251  
 AT3G10740.1,AT5G26120.1 Poptr1|717291,Poptr1|576068  
     Poptr1|576070  
     Poptr1|591530,Poptr1|576074  
 AT5G12250.1 Poptr1|734723,Poptr1|560355,Poptr1|722705,Poptr1|697476  
 AT1G50010.1,AT4G14960.2,AT1G04820.1 Poptr1|557543,Poptr1|577614,Poptr1|707459  
 AT5G19770.1,AT5G19780.1 Poptr1|711676  
 AT5G44340.1,AT4G20890.1 Poptr1|550601,Poptr1|582598  
 AT5G62690.1,AT5G62700.1 Poptr1|557988,Poptr1|549110  
 AT3G61650.1,AT5G05620.1 Poptr1|572355,Poptr1|342791  
 AT1G20010.1  
 AT1G75780.1  
 AT5G23860.1  
 AT2G29550.1  
     Poptr1|709348,Poptr1|554362  
     Poptr1|647111  
     Poptr1|733090,Poptr1|569745  
     Poptr1|711611  
     Poptr1|571195,Poptr1|738482  
     Poptr1|547597  
     Poptr1|646722  
     Poptr1|579315  
     Poptr1|680131,Poptr1|64606  
     Poptr1|548482,Poptr1|554344  
     Poptr1|576903,Poptr1|344282  
     Poptr1|748560  
 AT1G17455.1,AT1G72630.1 Poptr1|739115,Poptr1|640610,Poptr1|693745  
 AT2G40080.1 Poptr1|353674  
 AT2G29950.1 Poptr1|557921,Poptr1|64261  
 AT2G06255.1  
     Poptr1|574460  
 AT5G44860.1,AT4G19950.1 Poptr1|575650,Poptr1|570604  
 AT1G31130.1  
     Poptr1|714634,Poptr1|654652,Poptr1|591350,Poptr1|562471,Poptr1|551376  
 AT5G17770.1 Poptr1|571289  
 AT5G20080.1 Poptr1|716762  
     Poptr1|697095,Poptr1|741706  
     Poptr1|575076  
     Poptr1|679342  
     Poptr1|562805  
     Poptr1|725350  
 AT3G48330.1 Poptr1|733450,Poptr1|662075  
 AT5G50240.1  
 AT3G06670.1 Poptr1|354043,Poptr1|698305  
 AT5G49390.1  
 AT5G49370.1  
 AT5G49380.1  
     Poptr1|107767  
     Poptr1|354044  
 AT5G36700.1,AT5G36790.1 Poptr1|55442,Poptr1|696747  
 AT5G47760.1 Poptr1|671977  
     Poptr1|717277  
 AT5G01510.1 Poptr1|695382  
 AT2G23470.1 Poptr1|76199  
 AT5G49820.1 Poptr1|60077  
 AT3G10850.1 Poptr1|581074  
 AT1G06130.1,AT2G31350.1 Poptr1|718306,Poptr1|741505  
 AT2G43430.1  
     Poptr1|106878  
 AT3G27060.1 Poptr1|64960,Poptr1|742834  
 AT3G23580.1 Poptr1|354922

AT5G40942.1  
     Poptr1|590474  
     Poptr1|587028  
     Poptr1|585190  
 AT1G54610.1    Poptr1|345610,Poptr1|570939,Poptr1|742135  
 AT1G33770.1    Poptr1|592364,Poptr1|596761,Poptr1|58979  
 AT1G53050.1    Poptr1|728389  
 AT5G10270.1,AT5G64960.1    Poptr1|699588,Poptr1|717304  
 AT1G74330.1,AT1G18670.1    Poptr1|581389  
 AT5G50860.1    Poptr1|356110,Poptr1|575427  
 AT3G48750.1    Poptr1|694100  
 AT1G67580.1    Poptr1|686205,Poptr1|687029  
 AT5G39420.1    Poptr1|577691  
 AT3G05050.1  
 AT4G10010.1  
 AT1G09600.1,AT1G57700.1  
 AT1G71530.1  
 AT5G44290.1  
 AT4G22940.1  
 AT5G63370.1  
 AT3G01085.1  
     Poptr1|558644  
     Poptr1|654918,Poptr1|551295  
     Poptr1|742987  
     Poptr1|579704  
     Poptr1|559412  
     Poptr1|744986  
     Poptr1|345883  
     Poptr1|355746  
     Poptr1|576894  
     Poptr1|576891  
     Poptr1|687816  
     Poptr1|356016  
 AT3G04470.1    Poptr1|738252  
 AT1G04780.1    Poptr1|63082  
 AT1G62050.1    Poptr1|555304  
 AT3G24210.1  
 AT1G11740.1  
     Poptr1|729899  
     Poptr1|647109  
     Poptr1|660237  
 AT2G30370.1    Poptr1|663594,Poptr1|665938  
 AT3G22820.1    Poptr1|566193,Poptr1|696400  
 AT4G14723.1  
 AT3G55170.1,AT3G09500.1,AT5G02610.1,AT2G39390.1    Poptr1|698616,Poptr1|653750,Poptr1|561515  
     Poptr1|563832  
 AT2G43120.1    Poptr1|572931,Poptr1|684207  
 AT3G59260.1,AT3G59220.1  
 AT1G50590.1  
     Poptr1|585303  
     Poptr1|588559  
 AT4G37580.1,AT2G23060.1    Poptr1|51874,Poptr1|711834  
 AT2G30090.1    Poptr1|64675,Poptr1|54606  
 AT5G67430.1  
     Poptr1|100432,Poptr1|554886  
     Poptr1|566828  
 AT1G76530.1,AT1G20925.1,AT1G76520.1    Poptr1|346525  
 AT5G65980.1    Poptr1|71870  
 AT2G17500.1  
     Poptr1|350037,Poptr1|593148,Poptr1|569205,Poptr1|65840  
     Poptr1|727226  
     Poptr1|590172  
     Poptr1|587510,Poptr1|579172  
 AT2G30110.1,AT5G06460.1    Poptr1|722605,Poptr1|557633,Poptr1|557638,Poptr1|722610,Poptr1|683888  
 AT1G80410.1    Poptr1|548659  
     Poptr1|553694  
     Poptr1|63757  
     Poptr1|102739  
     Poptr1|680579,Poptr1|705520  
     Poptr1|63759  
 AT5G06390.1,AT3G11700.1    Poptr1|698777,Poptr1|561174  
 AT2G35860.1,AT3G52370.1  
 AT5G05650.1  
     Poptr1|593121,Poptr1|655702  
     Poptr1|568646,Poptr1|569680  
 AT1G50200.1    Poptr1|558710  
 AT5G22800.1    Poptr1|697154  
 AT1G49930.1  
     Poptr1|562836  
     Poptr1|546298  
 AT3G56690.1    Poptr1|351379  
 AT3G53230.1    Poptr1|576706,Poptr1|689390

AT2G03670.1 Poptr1|356762  
AT5G08470.1 Poptr1|548616  
AT1G80350.1 Poptr1|548648  
AT2G34560.2 Poptr1|588376,Poptr1|693998  
AT4G27680.1 Poptr1|574694  
AT3G01610.1 Poptr1|571847  
AT2G45500.1 Poptr1|572131  
AT2G27600.1 Poptr1|556731,Poptr1|54337  
AT5G03340.1,AT3G09840.1  
AT5G53540.1  
AT1G08270.2  
Poptr1|584560,Poptr1|580737  
Poptr1|548617  
Poptr1|574009  
Poptr1|584353  
Poptr1|591188  
Poptr1|698807,Poptr1|344859  
Poptr1|649132  
AT2G14750.1 Poptr1|697389,Poptr1|642099  
AT3G03900.1 Poptr1|729987  
AT5G67520.1  
AT4G39940.1  
Poptr1|571204  
AT5G28850.2,AT5G28900.1 Poptr1|573723  
AT5G44090.1,AT1G03960.1 Poptr1|684617,Poptr1|715218  
AT1G76800.1,AT3G43660.1,AT3G43630.1,AT1G21140.1 Poptr1|551331,Poptr1|559362  
AT3G25190.1  
Poptr1|642575,Poptr1|105147  
AT3G62120.1 Poptr1|552617,Poptr1|572525  
AT5G52520.1 Poptr1|741028  
AT5G10880.1  
Poptr1|670002  
Poptr1|556055  
Poptr1|648208  
AT4G34670.1,AT3G04840.1 Poptr1|719913,Poptr1|658489,Poptr1|680295  
AT4G00500.1 Poptr1|684336,Poptr1|346071,Poptr1|57027  
AT5G37710.1 Poptr1|348781  
AT3G49050.1  
Poptr1|545468  
Poptr1|545469  
Poptr1|582616,Poptr1|592107  
AT3G11670.1 Poptr1|576506  
AT4G00550.1  
Poptr1|561146  
AT5G59770.1 Poptr1|549211  
AT5G10480.1 Poptr1|719769  
AT5G10490.1 Poptr1|588141  
AT1G58200.1  
Poptr1|593779,Poptr1|588471,Poptr1|593778,Poptr1|579565  
Poptr1|643882  
Poptr1|643880,Poptr1|563295,Poptr1|100889  
AT3G13030.1,AT3G13020.1,AT3G13010.1 Poptr1|556885,Poptr1|563368  
AT3G22220.1 Poptr1|344029  
AT1G79740.1 Poptr1|345702  
AT3G17450.1 Poptr1|572542,Poptr1|644917  
AT4G15020.1  
Poptr1|701256,Poptr1|655697,Poptr1|355008,Poptr1|106154  
Poptr1|583894,Poptr1|576979  
Poptr1|99272  
Poptr1|97342  
Poptr1|574051,Poptr1|104901,Poptr1|561094,Poptr1|103024,Poptr1|348152,Poptr1|102642,Poptr1|54593  
2,Poptr1|545949,Poptr1|573336,Poptr1|98788,Poptr1|578158,Poptr1|65541  
Poptr1|569852,Poptr1|545212,Poptr1|581375,Poptr1|357108,Poptr1|591588,Poptr1|105279,Poptr1|63668,  
Poptr1|596194,Poptr1|104265,Poptr1|100592  
Poptr1|64863,Poptr1|642815  
Poptr1|556939,Poptr1|594844  
Poptr1|98307,Poptr1|96974  
Poptr1|72663  
Poptr1|102416  
AT4G35490.1 Poptr1|554005  
AT1G32990.1 Poptr1|569259,Poptr1|550468  
AT5G51610.1  
Poptr1|676997  
AT5G53120.1 Poptr1|747550,Poptr1|345718  
AT1G70310.1,AT1G23820.1 Poptr1|658609,Poptr1|657096  
Poptr1|680533  
AT3G09390.1,AT5G02380.1 Poptr1|690566,Poptr1|690284,Poptr1|683824  
Poptr1|558075,Poptr1|560759,Poptr1|580396,Poptr1|677329  
AT2G47230.1,AT3G62300.1 Poptr1|692249  
AT5G23800.1,AT1G03300.1,AT2G47220.1,AT5G23770.1,AT5G23780.1,AT1G26540.1  
AT2G46840.1  
AT1G09320.1



AT3G29400.1 Poptr1|668663,Poptr1|577750  
AT5G58430.1 Poptr1|729210,Poptr1|574536  
AT5G13990.1 Poptr1|586675,Poptr1|549744  
AT3G09520.1 Poptr1|561517  
AT5G50380.1 Poptr1|662149,Poptr1|575343  
AT1G72470.1 Poptr1|349422,Poptr1|98989  
AT5G59730.1 Poptr1|549217,Poptr1|558114  
AT5G52340.1 Poptr1|352135,Poptr1|576514  
AT5G13150.1 Poptr1|48590  
AT5G61010.1 Poptr1|596423  
AT4G31540.1 Poptr1|583127,Poptr1|58623  
AT5G03540.1 Poptr1|725398,Poptr1|353224  
AT1G07000.1  
AT3G09530.1  
AT3G14090.1,AT1G54090.1  
AT1G07725.1,AT2G28650.1,AT2G28640.1  
AT5G52350.1  
Poptr1|577751  
Poptr1|681584  
Poptr1|673798  
Poptr1|563471,Poptr1|567808  
AT3G52660.1 Poptr1|741791,Poptr1|735383,Poptr1|717692  
AT4G00830.1 Poptr1|688203,Poptr1|342839  
AT5G28390.1  
Poptr1|721324  
AT2G47310.1 Poptr1|348372  
AT4G16280.2 Poptr1|698328  
AT5G21170.1 Poptr1|558171,Poptr1|683796  
AT4G16360.1 Poptr1|734469,Poptr1|695678  
AT2G28060.1 Poptr1|697743,Poptr1|595093  
Poptr1|573105  
AT3G54190.1,AT2G38630.1 Poptr1|589597,Poptr1|734414  
Poptr1|571657,Poptr1|97273,Poptr1|571659  
Poptr1|571660  
Poptr1|591287  
AT4G15248.1,AT3G21890.1 Poptr1|562313,Poptr1|594447  
AT4G27310.1,AT5G54470.1 Poptr1|582065,Poptr1|568988  
Poptr1|544928,Poptr1|544929  
Poptr1|571834  
AT3G16480.1,AT1G51980.1 Poptr1|683777,Poptr1|720352,Poptr1|355022  
AT5G48760.1,AT3G24830.1,AT4G13170.1,AT3G07110.2 Poptr1|641932,Poptr1|577417  
Poptr1|553165  
AT3G22060.1,AT3G58310.1  
Poptr1|562323,Poptr1|595145,Poptr1|594437,Poptr1|562316,Poptr1|718499,Poptr1|562320,Poptr1|59443  
0,Poptr1|594438,Poptr1|594428,Poptr1|594440  
AT4G20570.1,AT3G21940.1,AT4G20560.1,AT4G20590.1,AT3G22010.1,AT4G23170.1,AT4G20670.1,AT4G20530.1,A  
T4G20540.1,AT4G20630.1,AT3G21960.1,AT4G20600.1,AT2G31620.1,AT3G22000.1,AT3G21970.1,AT5G41280.1,AT  
1G63580.1,AT3G21900.1,AT3G22020.1,AT3G21980.1,AT3G21920.1,AT4G20650.1,AT4G20610.1,AT5G48540.1,AT3  
G21930.1,AT3G21910.1,AT5G41300.1,AT4G20580.1,AT3G29040.1,AT1G63550.1,AT3G22040.1,AT4G20640.1,AT1G  
63600.1,AT1G61750.1,AT4G20620.1,AT5G41290.1,AT1G63590.1,AT1G63560.1,AT3G21990.1,AT4G20680.1,AT1G6  
3570.1,AT4G20550.1,AT3G22050.1  
Poptr1|544890,Poptr1|544903,Poptr1|562321,Poptr1|568395,Poptr1|555407,Poptr1|555409,Poptr1|54490  
0,Poptr1|102421,Poptr1|108626,Poptr1|660367,Poptr1|107571,Poptr1|544904,Poptr1|544888,Poptr1|594236,Poptr1|5  
79237,Poptr1|594239,Poptr1|349038,Poptr1|589753,Poptr1|592514,Poptr1|568227,Poptr1|555405  
AT3G22030.1  
AT4G20710.1  
AT3G29050.1  
Poptr1|544897  
Poptr1|592405  
Poptr1|559538  
AT4G40020.1,AT5G16730.1,AT3G02930.1,AT1G65010.1,AT4G27595.1  
Poptr1|665371,Poptr1|75692,Poptr1|71608,Poptr1|571421  
AT4G33330.1 Poptr1|703114  
AT1G54940.1,AT1G08990.1 Poptr1|59992,Poptr1|662758  
AT3G18660.2 Poptr1|558398,Poptr1|562455  
AT1G77130.1  
AT2G18730.1 Poptr1|717612,Poptr1|669482  
AT5G57690.1  
AT4G30340.1  
Poptr1|653666,Poptr1|680051  
AT1G14640.1,AT1G14650.1 Poptr1|562830,Poptr1|51787  
AT5G12280.1  
AT5G06520.1,AT3G49130.1,AT4G16200.1  
AT2G43960.1  
AT3G27600.1  
Poptr1|558713  
AT2G41070.1,AT3G56850.1 Poptr1|567832,Poptr1|344830,Poptr1|594286  
Poptr1|344053  
Poptr1|549022  
Poptr1|347326  
Poptr1|642918  
AT5G54090.1 Poptr1|355445

AT1G65070.1 Poptr1|693924  
Poptr1|580888  
Poptr1|552804  
AT2G19490.1 Poptr1|717577  
AT1G79050.1 Poptr1|586875  
AT3G10140.1 Poptr1|576372,Poptr1|716928  
AT3G32920.1  
Poptr1|98318  
Poptr1|582234  
AT5G47430.1,AT4G17410.1 Poptr1|356486  
Poptr1|349752  
Poptr1|592245  
Poptr1|104367,Poptr1|349751  
AT5G03940.1 Poptr1|58062  
Poptr1|588085,Poptr1|352507  
Poptr1|676315  
AT3G21180.1 Poptr1|725300,Poptr1|697031  
AT3G63380.1 Poptr1|346931,Poptr1|651823  
AT4G00900.1 Poptr1|731397  
AT2G22950.1,AT4G37640.1 Poptr1|349838  
AT3G22910.1 Poptr1|566178,Poptr1|345426  
AT2G41560.1,AT3G57330.1 Poptr1|100697,Poptr1|344123,Poptr1|734863  
AT1G10130.1 Poptr1|572023,Poptr1|347573  
AT1G27770.1 Poptr1|730789  
AT5G53010.1,AT4G29900.1,AT5G57110.1  
Poptr1|597176,Poptr1|571030,Poptr1|571012  
Poptr1|351237  
Poptr1|575905  
Poptr1|72114  
Poptr1|597178,Poptr1|742035,Poptr1|575906  
Poptr1|597177  
Poptr1|350815  
Poptr1|576231  
Poptr1|572024  
AT3G05990.1 Poptr1|354444  
AT3G19230.1  
Poptr1|566276  
AT2G44710.1 Poptr1|692469,Poptr1|591746  
Poptr1|575695  
Poptr1|655440,Poptr1|549854,Poptr1|741275,Poptr1|596534  
Poptr1|65130  
AT4G31985.1,AT3G02190.1  
Poptr1|653534,Poptr1|341812,Poptr1|737313,Poptr1|669640,Poptr1|654208,Poptr1|679437  
AT2G25210.1  
AT2G20760.1 Poptr1|555555,Poptr1|743775  
AT3G51890.1,AT2G40060.1  
Poptr1|571745  
AT1G73460.1,AT1G73450.1 Poptr1|569399,Poptr1|580646  
AT2G40120.1 Poptr1|696781  
AT3G17750.1  
Poptr1|724460  
AT3G53030.1 Poptr1|594855,Poptr1|589549  
AT2G17530.1,AT4G35500.2 Poptr1|586007,Poptr1|71901  
AT3G44850.1,AT5G22840.1  
AT3G54760.1 Poptr1|567549  
AT4G37100.1,AT2G23520.1 Poptr1|71946,Poptr1|53334  
AT5G51920.1 Poptr1|640560,Poptr1|575763  
AT5G66950.1  
Poptr1|343598  
AT5G60580.2 Poptr1|558248  
AT3G06330.1,AT5G18760.1 Poptr1|565263  
Poptr1|701269,Poptr1|351297,Poptr1|589422  
AT4G39730.1,AT2G22170.1 Poptr1|71655,Poptr1|558549,Poptr1|562620,Poptr1|562619  
AT5G65158.1  
Poptr1|693531  
AT2G37090.1 Poptr1|702714  
AT1G27600.1 Poptr1|710872  
Poptr1|735460  
Poptr1|584099  
Poptr1|578089,Poptr1|344673  
AT5G48670.1 Poptr1|97553  
AT5G27810.1  
AT5G27960.1,AT1G65300.1,AT5G26580.1,AT5G26650.1,AT1G31630.1,AT1G65330.1  
AT1G31640.1  
AT5G26630.1  
Poptr1|561164  
AT5G13300.1 Poptr1|554695  
AT5G61980.1 Poptr1|575452  
AT1G10870.1,AT1G60860.1  
Poptr1|640102  
Poptr1|640103  
AT1G56050.1 Poptr1|550540

AT1G30580.1 Poptr1|582578,Poptr1|684097  
Poptr1|588863  
Poptr1|569187  
AT5G52470.1,AT4G25630.1 Poptr1|699322,Poptr1|57829  
AT5G52490.1  
Poptr1|345560  
Poptr1|572276  
AT5G08480.2 Poptr1|546602  
AT1G28280.1 Poptr1|97181,Poptr1|555787  
AT2G33780.1  
Poptr1|654267,Poptr1|654265  
Poptr1|568889,Poptr1|579453  
AT5G25950.1,AT5G25960.1 Poptr1|352730  
AT5G50150.1 Poptr1|699407  
AT1G55360.1,AT3G13510.1 Poptr1|547589,Poptr1|684720  
AT5G18460.1 Poptr1|56681,Poptr1|702388  
AT1G23340.1,AT1G70550.1 Poptr1|345540,Poptr1|55052  
AT4G15056.1  
AT5G37520.1,AT4G15053.1,AT1G10190.1,AT5G56530.1,AT4G10220.1,AT4G15050.1  
AT4G23380.1,AT4G23390.1,AT2G20170.1,AT4G23360.1  
AT2G17750.1,AT2G44220.1  
AT5G11660.1,AT2G35250.1  
AT2G44210.2  
AT2G44250.1  
AT4G23080.1,AT5G25415.1,AT5G05030.1  
AT4G17505.1,AT2G27320.1  
AT2G03930.2  
AT5G19170.1  
AT3G48230.1  
AT2G38255.1,AT1G10750.1  
Poptr1|352729  
Poptr1|672718  
AT1G68670.1,AT1G25550.1 Poptr1|345244  
AT4G37180.2 Poptr1|581474,Poptr1|557338,Poptr1|655180,Poptr1|651036  
AT3G25790.1,AT1G13300.1  
AT1G49560.1  
AT5G08415.1 Poptr1|96821,Poptr1|56860  
AT2G20860.1 Poptr1|562739,Poptr1|558638  
Poptr1|579400  
AT4G26190.1 Poptr1|703730,Poptr1|725378,Poptr1|748458,Poptr1|545958  
AT3G29760.1  
AT2G36550.1,AT2G36540.1  
Poptr1|679315  
AT1G04400.1 Poptr1|705186  
AT4G08920.1 Poptr1|559103,Poptr1|709883  
Poptr1|564940  
Poptr1|587928  
AT3G20800.1 Poptr1|55829,Poptr1|707581  
AT5G12980.1  
AT2G32550.1  
AT1G60440.1 Poptr1|697996,Poptr1|696311,Poptr1|688496  
AT4G32180.1  
Poptr1|553080  
AT3G48930.1,AT5G23740.1,AT4G30800.1 Poptr1|738092,Poptr1|677637,Poptr1|681942  
Poptr1|560063  
AT3G63490.1 Poptr1|697525,Poptr1|683850  
AT2G42710.1 Poptr1|732060  
Poptr1|676996  
AT4G10250.1 Poptr1|730463  
AT5G59720.1,AT3G46230.1,AT1G53540.1 Poptr1|579131,Poptr1|659595,Poptr1|549183,Poptr1|563962  
AT1G52560.1 Poptr1|548944  
AT5G37670.1 Poptr1|645208  
AT1G54050.1 Poptr1|553809  
AT4G27670.1 Poptr1|569622  
AT5G12030.1,AT5G12020.1 Poptr1|561615  
AT1G59860.1,AT1G07400.1,AT2G29500.1  
Poptr1|650093,Poptr1|679803,Poptr1|722968,Poptr1|703507,Poptr1|679801,Poptr1|723185,Poptr1|10492  
4,Poptr1|721480,Poptr1|738813,Poptr1|574257  
AT4G21870.1 Poptr1|567998  
Poptr1|351844  
Poptr1|549610,Poptr1|653054  
Poptr1|558085  
Poptr1|659379  
Poptr1|584147  
Poptr1|55024  
Poptr1|574673  
Poptr1|558332  
Poptr1|669821,Poptr1|652851  
Poptr1|592276,Poptr1|705954  
AT1G23260.1,AT1G70660.1 Poptr1|720717,Poptr1|658724  
AT3G52560.2 Poptr1|653682,Poptr1|576536  
AT2G36060.2

AT4G36710.1 Poptr1|655267,Poptr1|679258  
AT3G60630.1,AT2G45160.1 Poptr1|554194,Poptr1|591663,Poptr1|711203,Poptr1|592659,Poptr1|581250  
AT4G00150.1 Poptr1|342681  
AT1G10510.1 Poptr1|721160  
AT3G08980.1 Poptr1|735791  
AT1G53530.1 Poptr1|642413,Poptr1|707831  
Poptr1|562821,Poptr1|694370  
AT2G16650.1 Poptr1|594808,Poptr1|556740,Poptr1|721527  
AT2G32230.1 Poptr1|592890,Poptr1|714323  
AT5G60430.1  
Poptr1|584037,Poptr1|545596  
AT1G72480.1 Poptr1|745832  
AT1G61670.1 Poptr1|351993  
AT2G01070.1  
AT1G10980.1  
Poptr1|553620,Poptr1|553585  
AT3G07565.3 Poptr1|732566  
AT1G60670.1,AT1G10820.2 Poptr1|698126,Poptr1|721089  
AT1G68160.1  
Poptr1|654432,Poptr1|703472  
AT1G57760.1,AT1G09645.1 Poptr1|583498,Poptr1|596754  
Poptr1|702533  
AT5G54760.1,AT5G54940.1,AT1G54290.1,AT4G27130.1 Poptr1|698348  
Poptr1|569089,Poptr1|663349,Poptr1|682309,Poptr1|654547  
Poptr1|594466  
AT1G04120.1 Poptr1|573380  
AT3G21250.1 Poptr1|592737  
AT3G13080.1 Poptr1|555041,Poptr1|65461,Poptr1|550171  
AT1G30400.1,AT2G34660.1 Poptr1|698974  
AT2G47800.1,AT3G62700.1 Poptr1|692309  
AT3G59140.1 Poptr1|569460,Poptr1|746631,Poptr1|355192  
AT3G13100.1,AT3G13090.1  
AT1G71330.1  
AT1G30410.1,AT1G30420.1  
AT2G07680.1  
Poptr1|553288  
Poptr1|63462  
Poptr1|592739  
Poptr1|587808,Poptr1|555042,Poptr1|350854  
Poptr1|99223  
Poptr1|350866,Poptr1|590236  
Poptr1|565079  
Poptr1|585002  
Poptr1|577033,Poptr1|748486,Poptr1|593485,Poptr1|100158  
Poptr1|343672  
Poptr1|548376  
Poptr1|646708  
AT3G18290.1 Poptr1|569807  
AT1G74770.1,AT1G18920.1 Poptr1|700883  
AT1G74760.1  
AT1G18910.1  
Poptr1|354194,Poptr1|723716  
Poptr1|720441  
AT3G60340.1 Poptr1|693627,Poptr1|702866  
AT4G17470.1,AT5G47330.1,AT4G17480.1,AT5G47340.1,AT4G17483.1  
AT5G47350.1  
Poptr1|692484  
Poptr1|591790  
AT1G07540.1 Poptr1|723257  
AT5G59430.1,AT3G46590.2  
AT3G12560.1,AT5G13820.1  
Poptr1|560771  
Poptr1|706121  
Poptr1|641182  
AT2G44970.1 Poptr1|591707  
Poptr1|675706,Poptr1|669360  
Poptr1|578516  
Poptr1|108754  
AT5G24860.1,AT5G10625.1 Poptr1|98451,Poptr1|586327  
AT4G31380.1  
Poptr1|690212  
AT3G28730.1 Poptr1|712808,Poptr1|577589  
AT1G42970.1 Poptr1|685470,Poptr1|550745  
AT3G26650.1,AT1G12900.1 Poptr1|572827  
Poptr1|348486  
AT1G06920.1,AT2G30400.1 Poptr1|560981,Poptr1|571884  
AT4G18830.1 Poptr1|555630  
AT5G01840.1  
AT5G58360.1  
AT5G55620.1 Poptr1|560207,Poptr1|572356  
AT3G55570.1 Poptr1|711149,Poptr1|554457,Poptr1|572357,Poptr1|569477  
AT3G09950.1

Poptr1|65104,Poptr1|597048  
AT2G43010.1,AT3G59060.3 Poptr1|651728  
AT4G36930.1 Poptr1|72016,Poptr1|591980,Poptr1|347641  
AT5G62610.1 Poptr1|666377  
AT5G48560.1,AT3G07340.1 Poptr1|572918,Poptr1|553223  
AT1G68920.1 Poptr1|566736,Poptr1|656739  
AT1G73830.1,AT1G18400.1 Poptr1|661736  
AT4G09180.1,AT1G35460.1 Poptr1|703215,Poptr1|738792  
AT5G50915.1 Poptr1|570330,Poptr1|575437  
AT3G57800.1,AT2G42300.1 Poptr1|701362,Poptr1|704719  
AT1G10120.1 Poptr1|72108,Poptr1|551748  
AT4G34530.1 Poptr1|649402,Poptr1|556478  
AT1G59640.2 Poptr1|686188  
AT3G23690.1  
AT1G26260.1  
AT1G25330.1  
AT2G18300.2  
Poptr1|710327  
Poptr1|656738  
Poptr1|545344,Poptr1|580804  
Poptr1|554707,Poptr1|63193  
AT4G21470.1 Poptr1|347201,Poptr1|685305  
AT2G38740.1 Poptr1|589959,Poptr1|743203,Poptr1|702900  
Poptr1|580127  
Poptr1|591814  
Poptr1|551934  
AT4G10955.1 Poptr1|554502,Poptr1|63415  
AT5G24220.1,AT5G24200.1,AT5G24190.1,AT5G24180.1,AT5G24210.1,AT5G24230.1  
AT2G05260.1  
AT4G39220.1,AT2G21600.1 Poptr1|649394,Poptr1|648623  
Poptr1|556485  
Poptr1|643100,Poptr1|694782  
Poptr1|655092  
AT1G65840.1 Poptr1|592873,Poptr1|693842  
AT3G59050.1,AT2G43020.1 Poptr1|685354  
Poptr1|692822  
AT5G02820.1 Poptr1|675953  
AT3G13170.1 Poptr1|550198  
AT1G63990.1 Poptr1|640438  
AT4G15440.1 Poptr1|688325  
AT5G42650.1 Poptr1|644172,Poptr1|677770  
Poptr1|593046,Poptr1|556416,Poptr1|557312,Poptr1|556417  
Poptr1|582241,Poptr1|671963  
AT2G39570.1 Poptr1|353526,Poptr1|724757  
AT2G36840.1 Poptr1|550416,Poptr1|569300,Poptr1|686546,Poptr1|687401  
Poptr1|683832  
AT2G34410.1,AT1G29890.2 Poptr1|698937,Poptr1|641544  
AT5G46340.1  
Poptr1|674771  
AT5G56170.1 Poptr1|550665,Poptr1|744854  
Poptr1|574400,Poptr1|582705  
AT1G13980.1 Poptr1|577592,Poptr1|577593  
AT5G19610.1 Poptr1|578433  
AT5G39500.1  
Poptr1|592581  
AT3G18210.1 Poptr1|574951,Poptr1|345822  
AT1G48740.1,AT5G43660.1  
AT1G47940.1  
AT1G22950.1  
AT1G48700.1  
Poptr1|661719  
Poptr1|696549  
AT5G61410.1 Poptr1|744163  
AT1G63290.1,AT3G01850.1 Poptr1|683945  
AT4G32700.1 Poptr1|578118  
Poptr1|668959  
Poptr1|561797  
Poptr1|668958  
AT1G02660.1 Poptr1|684264  
AT3G61680.1 Poptr1|572381,Poptr1|342798  
AT3G62590.1  
Poptr1|593007  
AT5G64460.1 Poptr1|642163,Poptr1|722525  
AT1G09935.1  
Poptr1|684449,Poptr1|710877  
AT1G07170.1,AT2G30000.1 Poptr1|686800,Poptr1|641472  
Poptr1|583835,Poptr1|583836,Poptr1|583834,Poptr1|568115  
Poptr1|649849,Poptr1|706560  
AT1G16240.1,AT1G79590.1 Poptr1|716952,Poptr1|701294,Poptr1|688674,Poptr1|560328  
AT1G16230.1,AT1G16225.1  
AT1G65930.1 Poptr1|648243,Poptr1|55426,Poptr1|353782,Poptr1|678577  
AT5G14590.1 Poptr1|691562

AT1G54340.1  
AT1G23890.2 Poptr1|552955,Poptr1|545465  
AT3G14860.2 Poptr1|699059,Poptr1|746373  
AT1G23880.1,AT1G70280.2 Poptr1|576712,Poptr1|564786,Poptr1|726669  
AT5G14890.1  
Poptr1|656832  
AT5G51110.1 Poptr1|588187,Poptr1|575504  
Poptr1|570403,Poptr1|580976  
Poptr1|570402  
AT3G07680.1 Poptr1|684042  
AT3G22845.1 Poptr1|687089  
AT1G26120.1 Poptr1|698269  
AT3G02410.1,AT5G15860.1 Poptr1|693811,Poptr1|580759  
AT5G23250.1,AT5G08300.1 Poptr1|704089,Poptr1|694368  
Poptr1|585783,Poptr1|728806  
Poptr1|580594  
Poptr1|594147  
AT1G31930.1 Poptr1|590073  
AT2G23460.1 Poptr1|76201,Poptr1|694414  
Poptr1|355100,Poptr1|60339  
Poptr1|554077  
Poptr1|646310  
Poptr1|744199  
ATCG01000.1,ATCG01130.1 Poptr1|587236  
Poptr1|590951,Poptr1|580218  
Poptr1|580560  
Poptr1|576303  
Poptr1|670538,Poptr1|670789,Poptr1|676958,Poptr1|673445  
Poptr1|561301  
Poptr1|580312  
Poptr1|568799  
Poptr1|591500  
AT2G28150.1 Poptr1|673391,Poptr1|558317  
AT5G59790.1,AT3G46110.1 Poptr1|49032,Poptr1|558108  
Poptr1|563854  
AT4G31700.1,AT5G10360.1 Poptr1|562563,Poptr1|559071,Poptr1|558503,Poptr1|707258,Poptr1|551600  
AT4G18450.1 Poptr1|674316,Poptr1|647912  
AT4G23750.1,AT4G11140.1 Poptr1|350317,Poptr1|63455  
AT3G16770.1 Poptr1|742345,Poptr1|697804  
AT4G31060.1 Poptr1|652926  
AT1G01250.1 Poptr1|592505,Poptr1|644594,Poptr1|644595,Poptr1|731369  
AT5G52020.1 Poptr1|343602,Poptr1|57787,Poptr1|548517,Poptr1|570520  
AT4G34410.1 Poptr1|557385,Poptr1|97516  
AT1G78080.1 Poptr1|72356,Poptr1|347362  
AT1G71450.1 Poptr1|574197,Poptr1|548836,Poptr1|574198  
AT1G33760.1 Poptr1|343347,Poptr1|678198  
AT4G25480.1,AT4G25490.1,AT5G51990.1,AT4G25470.1 Poptr1|666968,Poptr1|346104  
AT2G46310.1,AT3G61630.1 Poptr1|572351,Poptr1|661455,Poptr1|348048  
AT2G38340.1 Poptr1|567214,Poptr1|560950  
AT3G15210.1,AT1G53170.1 Poptr1|660903,Poptr1|579433  
AT3G23240.1 Poptr1|551047,Poptr1|55074,Poptr1|72875  
AT3G25890.1,AT1G68550.1 Poptr1|564525  
AT5G07310.1,AT5G61890.1 Poptr1|570362,Poptr1|63210,Poptr1|554686  
AT5G19790.1 Poptr1|555201,Poptr1|571194,Poptr1|58918,Poptr1|547598  
AT1G46768.1 Poptr1|558888,Poptr1|740456,Poptr1|644094  
AT5G13910.1 Poptr1|548122,Poptr1|554668,Poptr1|349740,Poptr1|676396  
AT2G36450.1 Poptr1|560236,Poptr1|575994  
AT4G13620.1 Poptr1|106037,Poptr1|577425,Poptr1|549823  
AT3G57600.1 Poptr1|652757,Poptr1|576331  
AT1G21910.1,AT1G44830.1 Poptr1|651392,Poptr1|595209,Poptr1|342429  
AT1G19210.1,AT1G74930.1 Poptr1|589322,Poptr1|739199,Poptr1|561557  
AT5G61590.1,AT5G07580.1 Poptr1|548216,Poptr1|588764  
AT5G64750.1 Poptr1|654928,Poptr1|558646  
AT1G28360.1 Poptr1|555768,Poptr1|704189  
AT5G47220.1 Poptr1|591541,Poptr1|103964,Poptr1|553919  
AT5G51190.1 Poptr1|588763,Poptr1|548217  
AT5G47230.1,AT4G17490.1 Poptr1|349772,Poptr1|747254  
AT2G23340.1,AT5G67190.1,AT4G36900.1 Poptr1|655111  
AT3G14230.1,AT1G53910.1 Poptr1|553816,Poptr1|673241  
AT1G80580.1 Poptr1|65105,Poptr1|668371  
AT1G75490.1 Poptr1|643046,Poptr1|559789  
AT4G28140.1,AT2G20880.1 Poptr1|571755  
AT5G25190.1 Poptr1|561963,Poptr1|654211,Poptr1|737318  
AT1G71520.1,AT1G22810.1 Poptr1|592362,Poptr1|574180  
AT5G25810.1,AT5G11590.1 Poptr1|668897,Poptr1|561750,Poptr1|108388  
AT1G64380.1 Poptr1|350343,Poptr1|63433  
AT5G25390.2,AT5G11190.1 Poptr1|352920,Poptr1|737192  
AT2G44940.1 Poptr1|551989,Poptr1|579903  
AT1G28370.1 Poptr1|693949,Poptr1|97205  
AT2G40220.1 Poptr1|567245,Poptr1|656279  
AT2G40350.1,AT2G40340.1 Poptr1|696765  
AT3G20310.1,AT1G50640.1 Poptr1|691789

AT1G22985.1,AT1G71130.1  
AT1G12630.1  
AT2G20350.1,AT5G67010.1,AT5G67000.1  
AT2G22200.1  
AT1G36060.1  
AT1G22190.1  
AT1G12610.1  
AT5G53290.1,AT4G27950.1  
AT5G05410.1  
AT1G06160.1,AT2G31230.1  
AT2G33710.1  
AT5G13330.1  
AT1G12890.1,AT1G28160.1  
AT5G18560.1  
AT1G77640.1  
AT5G21960.1  
AT4G17500.1  
AT5G61600.1  
AT4G06746.1  
AT3G50260.1  
AT1G72360.1  
AT5G18450.1  
AT4G32800.1  
AT2G25820.1  
AT1G77200.1  
AT2G35700.1  
AT1G03800.1  
AT3G11020.1  
Poptr1|571923  
Poptr1|710290,Poptr1|700421  
Poptr1|594051  
Poptr1|655154  
Poptr1|718816,Poptr1|71658  
Poptr1|548519,Poptr1|63608  
Poptr1|54324,Poptr1|594822  
Poptr1|594648,Poptr1|695735  
Poptr1|651887,Poptr1|692892,Poptr1|665280,Poptr1|571083  
Poptr1|674314  
Poptr1|552112,Poptr1|103213,Poptr1|572182,Poptr1|65810,Poptr1|569239  
Poptr1|353886  
Poptr1|72619,Poptr1|643452  
Poptr1|548218  
Poptr1|647913  
Poptr1|554858,Poptr1|63048  
Poptr1|97249,Poptr1|548900  
Poptr1|645979  
Poptr1|646133,Poptr1|676412  
Poptr1|72844  
AT5G37475.1,AT1G66070.1 Poptr1|714224  
Poptr1|645160,Poptr1|348697,Poptr1|645158,Poptr1|552865  
Poptr1|645149  
AT2G21045.1 Poptr1|572712  
AT2G17850.1 Poptr1|741224  
AT4G35770.1 Poptr1|703345  
AT5G66170.2  
AT5G66040.1  
Poptr1|346625  
AT4G18100.1,AT5G46430.1 Poptr1|660564,Poptr1|674791,Poptr1|710021,Poptr1|700702  
AT1G76050.2 Poptr1|642899  
Poptr1|559885  
Poptr1|108583  
AT5G54770.1 Poptr1|727068  
Poptr1|666727,Poptr1|544685,Poptr1|47396  
Poptr1|663351  
Poptr1|663350  
AT5G07830.1,AT5G61250.1 Poptr1|57500  
AT5G34940.2 Poptr1|583655,Poptr1|578860  
Poptr1|566955  
Poptr1|352956  
AT4G33630.1 Poptr1|577301  
AT1G27510.1  
Poptr1|562367  
AT2G41830.1 Poptr1|351531,Poptr1|57985  
AT1G05960.1 Poptr1|718347  
AT5G21080.1,AT5G26850.1 Poptr1|729421  
Poptr1|594507  
AT1G33120.1,AT1G33140.1,AT4G10450.1 Poptr1|569228,Poptr1|681880,Poptr1|699199  
Poptr1|705555  
AT2G35060.2,AT1G31120.1 Poptr1|690159,Poptr1|554185  
AT1G70300.1 Poptr1|698112,Poptr1|345379  
AT4G23640.1 Poptr1|693406  
AT2G30070.1 Poptr1|54609

AT2G40540.1 Poptr1|689932  
AT3G02050.1 Poptr1|572873,Poptr1|684170  
AT4G13420.1 Poptr1|63229,Poptr1|746851  
AT5G09400.1 Poptr1|712230,Poptr1|48865  
AT4G19960.1  
AT5G14880.1  
AT4G33530.1  
Poptr1|587314  
Poptr1|581260  
Poptr1|350055  
Poptr1|569358  
Poptr1|566382,Poptr1|558728,Poptr1|354351,Poptr1|350428  
Poptr1|562857,Poptr1|581289,Poptr1|75982  
Poptr1|548243  
Poptr1|579569  
Poptr1|580654  
Poptr1|103984  
Poptr1|569359  
Poptr1|587315,Poptr1|595276,Poptr1|586210  
Poptr1|108630  
Poptr1|103399  
AT5G20290.1 Poptr1|641311,Poptr1|722874,Poptr1|743662  
AT5G59240.1  
Poptr1|691808  
Poptr1|568538  
AT5G67270.1 Poptr1|72046  
AT3G47690.1,AT5G62500.1 Poptr1|661879,Poptr1|97423  
Poptr1|655084  
AT3G16150.1 Poptr1|689591,Poptr1|347625  
AT5G08100.1 Poptr1|705076  
AT4G11630.1,AT1G24240.1,AT5G11750.1 Poptr1|570141  
AT5G47190.1,AT4G17560.1 Poptr1|589910  
Poptr1|584247  
AT3G29970.1 Poptr1|545966,Poptr1|583847  
AT3G48140.1 Poptr1|55015,Poptr1|570036,Poptr1|719918  
AT1G47560.1,AT1G47550.1 Poptr1|677766,Poptr1|644177  
Poptr1|644178,Poptr1|677765  
Poptr1|677764,Poptr1|644179  
Poptr1|644180  
AT5G39860.1,AT3G28857.1 Poptr1|58377,Poptr1|545751  
AT1G74500.1 Poptr1|581363,Poptr1|355773  
AT5G15160.1  
AT3G47710.1  
AT1G26945.1  
AT5G27850.1,AT3G05590.1 Poptr1|644772,Poptr1|572675,Poptr1|662668,Poptr1|581899  
AT2G47570.1  
AT3G18740.1,AT1G36240.1,AT1G77940.1 Poptr1|679872,Poptr1|648993,Poptr1|558583,Poptr1|654831  
AT3G10950.1 Poptr1|743250,Poptr1|677646,Poptr1|589937,Poptr1|644264  
AT3G60245.1  
AT3G05170.1 Poptr1|595560  
AT1G08940.1  
Poptr1|712340  
AT3G58610.1 Poptr1|690109,Poptr1|693931  
Poptr1|592190  
Poptr1|591712  
Poptr1|574339  
AT1G11680.1 Poptr1|48605,Poptr1|554675  
AT5G57390.1 Poptr1|578588,Poptr1|704064  
AT5G10510.1 Poptr1|563289  
AT4G36920.1 Poptr1|655117,Poptr1|558886  
AT1G16060.1,AT1G79700.1 Poptr1|350749,Poptr1|62791,Poptr1|58733  
AT2G41710.2 Poptr1|344141  
AT5G17430.1 Poptr1|345072,Poptr1|567189  
AT1G72570.1 Poptr1|349456,Poptr1|63671,Poptr1|692565  
AT3G20840.1,AT1G51190.1 Poptr1|48527,Poptr1|350796  
AT5G65510.1  
AT5G67180.1  
AT4G37750.1  
Poptr1|576640  
Poptr1|59142  
Poptr1|352382  
Poptr1|102980  
Poptr1|583605  
AT2G30470.1 Poptr1|560988,Poptr1|571912  
Poptr1|571905  
AT5G41940.1 Poptr1|646820,Poptr1|640275,Poptr1|661607  
AT5G53570.1,AT3G49350.1,AT5G24390.1  
Poptr1|661606  
AT1G50840.1,AT3G20540.1 Poptr1|571521,Poptr1|569110  
Poptr1|571522  
Poptr1|590949  
Poptr1|582238



AT2G13350.1 Poptr1|591019,Poptr1|565827,Poptr1|354623  
 AT4G01200.1 Poptr1|348037  
 AT2G33320.1,AT1G04540.1  
 AT1G55255.1 Poptr1|639674  
 AT2G44950.1 Poptr1|740134,Poptr1|347800  
 AT1G55250.1  
 AT4G27500.1 Poptr1|579456,Poptr1|699096  
 AT1G20970.1 Poptr1|561264  
 Poptr1|582719  
 Poptr1|107073  
 AT5G09280.1 Poptr1|62718,Poptr1|351024,Poptr1|51677  
 AT3G53190.1 Poptr1|739568  
 AT4G22090.1,AT1G11920.1,AT4G22080.1 Poptr1|568064,Poptr1|99325  
 AT5G04310.1 Poptr1|567676  
 AT3G55140.1 Poptr1|686510  
 AT4G24780.1 Poptr1|575272,Poptr1|565960,Poptr1|570188,Poptr1|565107  
 AT1G04680.1 Poptr1|554820,Poptr1|547984  
 AT3G07010.1,AT5G48900.1 Poptr1|343132,Poptr1|573211  
 AT1G30350.1  
 AT3G54920.1  
 AT5G63180.1  
 AT1G67750.1  
 AT4G13710.1  
 AT3G24230.1  
 AT3G24670.1  
 AT4G13210.1  
 Poptr1|568062  
 Poptr1|563677  
 Poptr1|567502,Poptr1|588597  
 Poptr1|576605,Poptr1|695162  
 Poptr1|683929  
 AT2G24420.1,AT4G31340.1 Poptr1|583174,Poptr1|586341  
 AT4G30090.1  
 Poptr1|695481,Poptr1|560679  
 Poptr1|568764  
 AT1G28420.1 Poptr1|580947,Poptr1|594629,Poptr1|545258,Poptr1|562180  
 AT4G12750.1 Poptr1|573159  
 AT5G44180.1  
 AT5G35170.1 Poptr1|578803  
 AT5G47840.1 Poptr1|678179,Poptr1|574224  
 Poptr1|352284  
 AT3G57550.2,AT2G41880.1 Poptr1|701373,Poptr1|685792  
 AT3G13070.1,AT1G55930.1 Poptr1|65459  
 Poptr1|590723,Poptr1|579926  
 Poptr1|568500,Poptr1|550169  
 AT3G15080.1 Poptr1|684054  
 AT2G48100.1 Poptr1|552663  
 AT5G40310.1,AT3G27970.1 Poptr1|58347  
 Poptr1|596656  
 AT1G28760.1 Poptr1|573969,Poptr1|730053  
 AT3G49840.1,AT5G67610.2 Poptr1|76494  
 Poptr1|573970  
 Poptr1|571997,Poptr1|571980  
 Poptr1|593535  
 AT2G47410.1 Poptr1|57177  
 AT5G49430.1  
 Poptr1|723909  
 AT5G23430.1,AT5G08390.1 Poptr1|353095  
 AT1G11160.1,AT1G61210.1 Poptr1|568273,Poptr1|568413  
 AT1G52360.1,AT3G15980.3 Poptr1|693709  
 AT1G79990.1  
 Poptr1|548670  
 Poptr1|694998  
 Poptr1|578330  
 AT1G46480.1 Poptr1|711025,Poptr1|591986  
 AT2G17950.1 Poptr1|587553,Poptr1|689700,Poptr1|655458  
 AT5G59340.1 Poptr1|64407,Poptr1|558091  
 AT5G62200.1 Poptr1|734054  
 AT2G41470.1 Poptr1|578955,Poptr1|351616  
 AT5G62210.1  
 Poptr1|581332,Poptr1|570556,Poptr1|575716  
 Poptr1|567522  
 Poptr1|691312  
 Poptr1|570557  
 AT1G80920.1 Poptr1|61309,Poptr1|693204  
 AT1G72070.1  
 AT1G47056.1 Poptr1|347627,Poptr1|591999  
 AT5G67250.1,AT3G50080.1 Poptr1|651111,Poptr1|655088  
 AT4G07400.1  
 Poptr1|652940  
 AT5G22000.1 Poptr1|576461,Poptr1|691232  
 AT4G14220.1 Poptr1|564804,Poptr1|566288

Poptr1|597454,Poptr1|650570  
 Poptr1|558369  
 Poptr1|685665  
 AT5G36880.1 Poptr1|572831  
 Poptr1|585243  
 AT1G05630.1,AT2G31830.1,AT2G43900.1,AT1G65580.1 Poptr1|564130  
 Poptr1|668307  
 Poptr1|668308  
 Poptr1|659398  
 Poptr1|654326  
 Poptr1|659397  
 AT5G07270.1 Poptr1|688615,Poptr1|728552  
 AT5G57740.1 Poptr1|352418,Poptr1|58724  
 AT5G18630.1,AT5G18640.1 Poptr1|47235  
 AT5G55260.1 Poptr1|707576,Poptr1|687536  
 AT2G29400.1 Poptr1|723195,Poptr1|641133  
 AT1G10430.1,AT1G59830.1 Poptr1|657542,Poptr1|726341  
 AT2G39840.1 Poptr1|724596,Poptr1|563948  
 AT2G42500.1,AT3G58500.1 Poptr1|547629,Poptr1|711677  
 AT2G42810.2 Poptr1|572840  
 AT1G50370.1,AT3G19980.1 Poptr1|655626,Poptr1|725216  
 AT4G11240.1 Poptr1|709258  
 AT5G63870.1 Poptr1|550530  
 AT5G27840.2,AT3G05580.1 Poptr1|744555,Poptr1|570773  
 AT4G26720.1  
 AT1G69960.1  
 AT5G59160.1,AT3G46820.1  
 AT1G64040.1  
 AT1G48120.1  
 Poptr1|733185,Poptr1|682781  
 Poptr1|584508,Poptr1|571089  
 Poptr1|59222  
 Poptr1|561215,Poptr1|735123  
 Poptr1|642579,Poptr1|727218  
 AT5G08130.1 Poptr1|355709,Poptr1|574882,Poptr1|574881  
 AT1G69010.1 Poptr1|698288,Poptr1|564449  
 AT5G38860.1  
 Poptr1|673557,Poptr1|745734  
 Poptr1|674138  
 AT5G62280.1 Poptr1|57762  
 AT3G60780.1,AT2G45360.1 Poptr1|552041,Poptr1|581836,Poptr1|554240,Poptr1|572101  
 AT1G62840.1  
 Poptr1|572102  
 Poptr1|97329  
 AT2G46610.1,AT3G61860.1 Poptr1|572428,Poptr1|552308  
 AT4G25500.1,AT5G52040.2 Poptr1|687868  
 Poptr1|552113  
 Poptr1|666965  
 Poptr1|644386  
 AT1G01060.1 Poptr1|731468,Poptr1|552368  
 AT3G10113.1,AT1G18330.1 Poptr1|96978  
 AT2G46830.1  
 AT3G51160.1,AT5G66280.1 Poptr1|593866,Poptr1|563266  
 Poptr1|676810  
 AT3G08530.1,AT3G11130.1 Poptr1|567249,Poptr1|696774  
 Poptr1|576610,Poptr1|697450  
 Poptr1|683882  
 AT5G55190.1 Poptr1|578173,Poptr1|561857,Poptr1|561858  
 AT5G20010.1,AT5G20020.1  
 AT5G55080.1  
 AT1G45180.1,AT5G42940.1 Poptr1|347640,Poptr1|549913  
 AT2G15530.1,AT4G34040.1  
 AT5G27670.1 Poptr1|704386,Poptr1|662712  
 AT1G52740.1 Poptr1|695005,Poptr1|669007,Poptr1|669008,Poptr1|561845  
 AT5G02560.1 Poptr1|717022  
 AT3G54560.1 Poptr1|692862,Poptr1|651830  
 AT1G51060.1 Poptr1|661070,Poptr1|663327  
 AT1G54690.1,AT1G08880.1 Poptr1|595535,Poptr1|729701  
 AT5G59870.1  
 AT4G13570.1,AT2G38810.1  
 AT4G27230.1,AT5G54640.1,AT3G20670.1  
 Poptr1|595536,Poptr1|699787  
 AT1G07960.1 Poptr1|650541  
 AT2G47470.1 Poptr1|552506,Poptr1|731726  
 AT1G24160.1,AT1G70100.3 Poptr1|354840  
 AT3G26050.1 Poptr1|691617,Poptr1|565093  
 AT3G27350.1,AT5G40700.2  
 AT3G01710.1  
 AT1G70950.1  
 AT1G05690.1 Poptr1|562133,Poptr1|688890  
 AT3G48360.1,AT5G63160.1 Poptr1|700976,Poptr1|570187  
 AT4G37610.1,AT5G67480.2 Poptr1|349832

AT1G30480.1 Poptr1|568633,Poptr1|49412  
Poptr1|75732,Poptr1|103108,Poptr1|581831,Poptr1|680821,Poptr1|640294,Poptr1|105838  
Poptr1|353565,Poptr1|588062  
Poptr1|675400  
Poptr1|108017  
AT1G62640.1 Poptr1|581234  
Poptr1|584176,Poptr1|680508  
Poptr1|554208  
AT2G42490.1 Poptr1|575226,Poptr1|726236,Poptr1|570122  
Poptr1|588560  
AT3G07880.1 Poptr1|57331,Poptr1|343000  
Poptr1|667139,Poptr1|560152  
Poptr1|711216  
Poptr1|691996  
AT1G08450.1 Poptr1|562210,Poptr1|594551  
AT1G09210.1,AT1G56340.1 Poptr1|729430,Poptr1|744603  
Poptr1|702495  
AT1G51680.1,AT3G21240.1 Poptr1|578610,Poptr1|343915,Poptr1|547738,Poptr1|704057  
AT4G19010.1 Poptr1|343503  
AT3G16170.1 Poptr1|705747  
AT3G48990.1 Poptr1|701195,Poptr1|709380  
AT1G65060.1 Poptr1|665396  
AT1G20510.1 Poptr1|346608,Poptr1|73128  
AT1G62940.1 Poptr1|63127  
AT4G05160.1 Poptr1|714367,Poptr1|704152  
AT5G63380.1 Poptr1|570222,Poptr1|688529,Poptr1|662119  
AT3G21230.1  
AT1G20480.1  
AT1G20490.1,AT5G38120.1,AT1G20500.1  
Poptr1|104177  
Poptr1|675786  
Poptr1|593742  
Poptr1|590571  
Poptr1|585377  
Poptr1|589806  
Poptr1|580301  
Poptr1|585122  
Poptr1|567691  
Poptr1|580683  
Poptr1|109016  
Poptr1|554790  
Poptr1|597478  
Poptr1|667841  
Poptr1|576743  
Poptr1|353318  
Poptr1|570223,Poptr1|593539  
Poptr1|703451,Poptr1|679285  
Poptr1|580303  
Poptr1|64915  
Poptr1|570226  
AT2G01470.1,AT5G50550.1,AT5G50650.1 Poptr1|726873,Poptr1|354255  
AT3G52190.1 Poptr1|567716  
AT5G42050.1 Poptr1|684840  
AT3G27090.1 Poptr1|597161,Poptr1|683950  
AT2G35140.1 Poptr1|666861  
Poptr1|709134  
Poptr1|581036  
AT2G35390.2,AT1G32380.1 Poptr1|704007,Poptr1|589975  
AT2G44530.1 Poptr1|665011  
Poptr1|674090  
AT3G24450.1 Poptr1|578421  
AT2G28660.1 Poptr1|706245  
AT4G14000.1 Poptr1|691678  
AT2G43320.1 Poptr1|594499,Poptr1|654480  
Poptr1|592490,Poptr1|586604,Poptr1|597076,Poptr1|577336  
AT4G26000.1 Poptr1|583177,Poptr1|746572  
AT3G04610.1 Poptr1|595396,Poptr1|729865  
Poptr1|662941,Poptr1|680248  
AT3G22450.1 Poptr1|590379,Poptr1|564844,Poptr1|595528  
AT1G08845.1 Poptr1|570914  
AT3G20230.1 Poptr1|574253  
Poptr1|678135  
AT4G14140.1,AT4G08990.1,AT5G49160.1 Poptr1|545830,Poptr1|58832  
AT4G13610.1  
AT4G37420.1 Poptr1|559956  
AT1G27200.1 Poptr1|565215  
AT5G40720.1,AT3G27330.1 Poptr1|706898  
Poptr1|64890  
AT1G34130.1 Poptr1|743464,Poptr1|569431  
AT5G19690.1 Poptr1|578521  
Poptr1|580593  
Poptr1|690576

Poptr1|587387  
AT4G35220.1 Poptr1|691740  
AT1G44542.1,AT4G34180.1  
Poptr1|65216,Poptr1|707344  
Poptr1|593174,Poptr1|722277  
Poptr1|649604  
Poptr1|649605  
Poptr1|580311  
AT5G54680.1 Poptr1|687616,Poptr1|47600  
AT3G23210.1,AT4G14410.1 Poptr1|726363  
AT1G51070.1  
Poptr1|647678  
AT5G57815.1,AT4G28060.1 Poptr1|702207  
AT1G22450.1 Poptr1|651246  
AT1G32710.1  
Poptr1|643802  
AT5G04820.1 Poptr1|567905,Poptr1|563547,Poptr1|352453,Poptr1|667635  
AT3G52550.1,AT3G52540.1,AT2G36050.1  
AT5G16710.1 Poptr1|343092  
AT1G75270.1 Poptr1|563837,Poptr1|687372  
AT1G19550.1,AT1G19570.1  
AT5G36270.1  
Poptr1|579782  
Poptr1|586256  
Poptr1|594196  
AT5G17640.1 Poptr1|571332  
AT1G10020.1 Poptr1|551729,Poptr1|558970  
AT3G19680.1,AT1G50040.1 Poptr1|722466,Poptr1|642137  
AT4G29310.1  
AT3G21215.1 Poptr1|344823,Poptr1|567817  
AT3G13700.1 Poptr1|703271  
Poptr1|655110  
AT2G47460.1,AT5G49330.1,AT3G62610.1 Poptr1|554533,Poptr1|554534,Poptr1|709088,Poptr1|348105  
AT4G21440.1,AT4G05100.1 Poptr1|544991  
AT1G66370.1,AT1G66390.1,AT1G56650.1,AT1G66380.1  
Poptr1|348817,Poptr1|552998,Poptr1|552994,Poptr1|348818,Poptr1|348822  
AT3G12720.1 Poptr1|345093,Poptr1|63279,Poptr1|554618  
AT3G06490.1,AT5G49620.1 Poptr1|345180  
AT5G02320.1,AT3G09370.1 Poptr1|344245  
AT3G27785.1,AT5G40360.1 Poptr1|355897,Poptr1|64783,Poptr1|575172  
AT3G13540.1 Poptr1|595828,Poptr1|596671,Poptr1|571190,Poptr1|639636,Poptr1|571192,Poptr1|693120  
AT5G14340.1 Poptr1|64892  
AT3G23250.1,AT2G31180.1 Poptr1|643153,Poptr1|101321,Poptr1|52142,Poptr1|719990  
AT5G65790.1,AT3G49690.1 Poptr1|551740,Poptr1|718021  
AT5G10280.1,AT5G65230.1 Poptr1|75713,Poptr1|650712,Poptr1|51927  
AT5G35550.1 Poptr1|717876,Poptr1|668844,Poptr1|101475  
AT2G32460.1 Poptr1|645088  
AT5G16600.1 Poptr1|552946,Poptr1|555978  
AT4G38620.1 Poptr1|557085,Poptr1|556633  
AT3G53200.1 Poptr1|589497  
AT2G37630.1 Poptr1|695428  
AT1G17950.1,AT1G73410.1 Poptr1|562189,Poptr1|743577,Poptr1|569401  
AT2G36890.1 Poptr1|558303,Poptr1|676067,Poptr1|667877,Poptr1|584440  
AT3G13890.1 Poptr1|703929  
AT1G26780.1,AT1G69560.1 Poptr1|577665,Poptr1|567031,Poptr1|353853  
AT3G30210.1 Poptr1|98829,Poptr1|545980,Poptr1|545950  
AT3G61250.1 Poptr1|644433  
AT1G63910.1 Poptr1|691116,Poptr1|646666  
AT5G17800.1 Poptr1|573987,Poptr1|571286  
AT5G58850.1,AT5G11050.1 Poptr1|64283  
AT5G56110.1 Poptr1|98110  
AT3G47600.1,AT5G62470.2,AT3G28910.1 Poptr1|556366,Poptr1|701828  
AT1G08810.1 Poptr1|688014  
AT4G22680.1 Poptr1|712000,Poptr1|581214  
AT3G46130.1,AT5G59780.3 Poptr1|64431,Poptr1|650305  
AT4G33450.1 Poptr1|71521  
AT1G09540.1 Poptr1|56512,Poptr1|581592,Poptr1|552416  
AT1G68320.1,AT1G25340.1 Poptr1|566603,Poptr1|569814,Poptr1|564542  
AT2G39880.1,AT3G09230.1,AT3G55730.1 Poptr1|659589,Poptr1|563966  
AT5G55020.1 Poptr1|582715  
AT3G60460.1 Poptr1|591719,Poptr1|347796  
AT3G28470.1 Poptr1|577547  
AT5G15310.1,AT3G01140.1 Poptr1|668604  
AT5G52600.1 Poptr1|578919,Poptr1|560580  
AT2G23290.1,AT4G37260.1 Poptr1|558903,Poptr1|655080,Poptr1|592009  
AT5G12870.1 Poptr1|722776,Poptr1|64485,Poptr1|49071  
AT4G32730.2 Poptr1|561783,Poptr1|701968  
AT3G11440.1,AT5G06100.2 Poptr1|350938,Poptr1|639772,Poptr1|697703  
AT5G54230.1  
AT2G47190.1  
AT5G40430.1,AT2G25230.1  
AT4G18770.1

AT3G27920.1  
AT1G06180.1  
AT1G79180.1,AT1G56160.1,AT1G16490.1,AT3G12820.1  
AT4G37780.1  
AT1G34670.1  
AT1G66230.1  
AT4G34990.1,AT2G16720.1  
AT5G23000.1  
AT5G39700.1,AT3G29020.1  
AT1G74650.1  
AT4G12350.1  
AT5G26660.1  
AT4G01680.2  
AT1G57560.1  
AT4G26930.1  
AT5G61420.2,AT1G74080.1,AT5G60890.1,AT5G07700.1,AT5G07690.1  
AT1G18710.1,AT1G74430.1  
AT5G67300.1,AT3G50060.1  
AT3G08500.1  
AT5G11510.1  
AT2G26960.1,AT2G26950.1  
Poptr1|644814,Poptr1|659040,Poptr1|57184  
Poptr1|544925  
Poptr1|571811,Poptr1|60638  
Poptr1|552999,Poptr1|552995  
Poptr1|349755  
Poptr1|342934  
Poptr1|580306  
Poptr1|345508  
Poptr1|354709  
Poptr1|568324,Poptr1|568325  
Poptr1|571817,Poptr1|700066  
Poptr1|668762,Poptr1|653954  
Poptr1|548580  
Poptr1|717877  
Poptr1|60650  
Poptr1|105761,Poptr1|566512  
Poptr1|679119  
Poptr1|580774,Poptr1|714382,Poptr1|705661  
Poptr1|559321,Poptr1|347175  
Poptr1|570457,Poptr1|575814  
Poptr1|731056  
Poptr1|550654  
Poptr1|688588,Poptr1|356372  
Poptr1|356373  
Poptr1|562466  
Poptr1|565490  
Poptr1|732992  
Poptr1|355811  
Poptr1|564238,Poptr1|103277,Poptr1|720738  
Poptr1|642041,Poptr1|722301  
Poptr1|347682  
Poptr1|656277  
Poptr1|350192  
Poptr1|548691  
Poptr1|548692  
AT1G74100.1,AT1G18590.1,AT1G74090.1  
Poptr1|580864,Poptr1|660381,Poptr1|580865,Poptr1|660380,Poptr1|569469,Poptr1|97127,Poptr1|60401,  
Poptr1|60402,Poptr1|97130  
AT5G07010.1,AT5G07000.1 Poptr1|350902  
AT1G13430.1,AT4G26280.1,AT1G28170.1,AT5G43690.1,AT1G13420.1,AT2G03750.1,AT3G45080.1,AT3G45070.1,A  
T2G14920.1,AT2G27570.1 Poptr1|674399,Poptr1|591509,Poptr1|566759  
AT2G03770.1,AT2G03760.1  
Poptr1|580868,Poptr1|580869  
Poptr1|579390,Poptr1|583496,Poptr1|639767,Poptr1|547740,Poptr1|555124,Poptr1|579391,Poptr1|58525  
0,Poptr1|712555,Poptr1|547741,Poptr1|593556,Poptr1|350903,Poptr1|595192,Poptr1|583495,Poptr1|555127,Poptr1|1  
05261,Poptr1|585251,Poptr1|350904  
Poptr1|106459,Poptr1|108507  
Poptr1|106316  
Poptr1|107237  
Poptr1|579389,Poptr1|555126  
Poptr1|98840,Poptr1|583861  
AT3G19770.1,AT5G09320.1 Poptr1|559173  
Poptr1|581034,Poptr1|571653  
Poptr1|581035  
Poptr1|571652  
Poptr1|643687  
Poptr1|54240  
AT3G54660.1 Poptr1|575013  
AT3G24170.1 Poptr1|639962,Poptr1|684772  
Poptr1|583934  
Poptr1|582298

AT1G30450.1 Poptr1|55841  
Poptr1|550115  
Poptr1|642215  
Poptr1|642216  
Poptr1|642214  
AT5G18980.1 Poptr1|565667,Poptr1|345590  
AT4G14280.1  
AT3G06210.1  
AT4G35590.1 Poptr1|71890  
AT1G31300.1,AT4G19645.1 Poptr1|674640,Poptr1|575532  
AT4G10360.1 Poptr1|574446  
Poptr1|347021,Poptr1|694672  
AT2G44100.1,AT3G59920.1 Poptr1|690489,Poptr1|654310  
Poptr1|75530  
Poptr1|577313  
AT4G11660.1 Poptr1|548499  
AT4G13980.1 Poptr1|597074,Poptr1|641884  
AT2G41690.1 Poptr1|695546,Poptr1|576364  
AT1G46264.1 Poptr1|709942,Poptr1|591969  
AT4G36990.1 Poptr1|53312  
AT1G32330.1 Poptr1|346256,Poptr1|349914  
AT3G22830.1 Poptr1|345421,Poptr1|566191  
AT3G02990.1,AT5G16820.1 Poptr1|688032  
AT2G26150.1 Poptr1|561642  
AT1G67970.1 Poptr1|566423,Poptr1|686281  
AT5G62020.1 Poptr1|570475,Poptr1|575795  
AT4G18880.1 Poptr1|568665,Poptr1|546410  
AT4G17750.1  
AT5G43840.1  
AT1G77570.1  
AT4G19630.1  
AT4G18870.1  
AT5G45710.1  
Poptr1|545307  
Poptr1|576393  
Poptr1|641429  
Poptr1|643254,Poptr1|715043  
Poptr1|103124,Poptr1|97154  
Poptr1|573864  
Poptr1|352050  
Poptr1|572837  
AT3G49010.1,AT5G23900.1 Poptr1|590116,Poptr1|735427,Poptr1|662795,Poptr1|693546  
AT3G48960.1  
AT1G13950.1 Poptr1|724093,Poptr1|695222,Poptr1|696696,Poptr1|702242  
AT1G69410.1,AT1G26630.1  
AT5G46170.1,AT4G18380.1 Poptr1|568418,Poptr1|555594  
AT1G78100.1,AT1G22220.1 Poptr1|51932  
AT1G30200.1  
Poptr1|650118  
Poptr1|551561  
AT1G10760.1 Poptr1|697986,Poptr1|354794  
AT4G24450.1  
Poptr1|345541  
AT1G72370.1 Poptr1|553810,Poptr1|666820,Poptr1|673233,Poptr1|674637  
AT3G04770.1  
AT2G47510.1 Poptr1|552480  
AT5G50950.1  
Poptr1|579693  
Poptr1|589707  
AT1G57860.1,AT1G09690.1,AT1G57660.1,AT1G09590.1 Poptr1|640151,Poptr1|695260,Poptr1|554656  
Poptr1|735108  
AT3G48530.1 Poptr1|575342,Poptr1|570249  
AT1G69800.1 Poptr1|577408  
Poptr1|557230  
Poptr1|585804  
Poptr1|674145  
AT1G24360.1 Poptr1|697938  
AT2G29150.1,AT2G29350.1,AT2G29360.1,AT2G29370.1  
Poptr1|723905,Poptr1|570880,Poptr1|699770  
AT2G29260.1 Poptr1|64334  
AT2G29300.1,AT1G07440.1,AT2G30670.1,AT2G29330.1,AT2G29320.1,AT2G29310.1,AT2G29340.1  
Poptr1|706088,Poptr1|720123  
AT5G06060.1  
AT1G07450.1  
Poptr1|588720  
Poptr1|580528  
Poptr1|586941  
Poptr1|105688  
Poptr1|680387  
Poptr1|656666  
Poptr1|588969  
Poptr1|558020

Poptr1|676322  
AT5G55390.1 Poptr1|550146  
Poptr1|573064,Poptr1|550145  
Poptr1|691806  
AT3G51770.2 Poptr1|344321  
AT4G02680.1 Poptr1|715033  
Poptr1|577041,Poptr1|735925  
Poptr1|54604  
Poptr1|64681  
Poptr1|710726  
Poptr1|710727  
AT3G03780.1,AT5G17920.1 Poptr1|699903,Poptr1|738504  
Poptr1|594861,Poptr1|649045  
Poptr1|673833  
AT1G14790.1 Poptr1|564680  
AT3G49500.1 Poptr1|561891,Poptr1|58557  
AT4G11130.1 Poptr1|575133  
AT2G05370.1  
Poptr1|581278,Poptr1|354308  
Poptr1|106111  
AT4G29340.1,AT2G19770.1 Poptr1|653969,Poptr1|685002,Poptr1|548926,Poptr1|668776  
AT5G56600.1  
AT2G19760.1,AT4G29350.1  
AT5G51820.1 Poptr1|575734,Poptr1|570540  
AT1G70730.1,AT1G23190.1 Poptr1|658745,Poptr1|696513  
AT2G22870.1 Poptr1|76484  
Poptr1|571987  
AT4G04210.1,AT4G22150.1 Poptr1|568034,Poptr1|704900,Poptr1|568093  
AT4G15410.1 Poptr1|709952,Poptr1|573001  
AT3G21660.1  
Poptr1|584720  
AT4G31470.1 Poptr1|578386  
AT1G50060.1 Poptr1|54561  
AT4G25780.1 Poptr1|578632  
AT4G30320.1 Poptr1|578630  
AT2G14610.1,AT2G14580.1  
Poptr1|550049,Poptr1|595855,Poptr1|595857,Poptr1|707470,Poptr1|649729,Poptr1|649730,Poptr1|74854  
3,Poptr1|581980  
AT5G66590.1 Poptr1|558812,Poptr1|563075  
AT1G50050.1  
AT5G57625.1,AT4G25790.1  
AT3G09590.1  
AT4G33730.1  
AT4G07820.1  
AT2G19990.1,AT4G33720.1  
AT1G01310.1  
AT5G26130.1,AT4G33710.1  
AT3G19690.1  
Poptr1|54565,Poptr1|579850  
AT2G26800.2 Poptr1|686806  
Poptr1|695598  
Poptr1|576154,Poptr1|641432  
Poptr1|579633  
Poptr1|641431  
AT3G04800.1 Poptr1|595440,Poptr1|597661,Poptr1|681658,Poptr1|662902  
AT1G17530.1,AT1G72750.1  
AT1G23400.1 Poptr1|687061  
AT4G31010.1 Poptr1|572157  
AT2G20020.1 Poptr1|705144  
AT2G25870.1 Poptr1|577915  
Poptr1|561723  
AT1G32583.1 Poptr1|351246  
Poptr1|570310  
AT4G33380.1 Poptr1|692519,Poptr1|591923  
Poptr1|658086  
AT3G57680.1 Poptr1|652765  
AT4G17740.1 Poptr1|354641  
Poptr1|565846  
AT4G02390.1 Poptr1|572682  
AT2G31320.1 Poptr1|684602  
Poptr1|557064  
Poptr1|353149  
Poptr1|106633  
AT4G26500.1 Poptr1|582565,Poptr1|550633  
AT1G55805.1  
AT3G15310.1,AT5G32621.1,AT5G34838.1 Poptr1|561179,Poptr1|52218,Poptr1|103117  
AT1G43590.1  
AT2G10980.1  
AT2G07520.1  
AT2G14730.1  
Poptr1|349200,Poptr1|76089,Poptr1|58469  
AT4G14930.1 Poptr1|658531

AT1G72880.1 Poptr1|597685,Poptr1|592785  
Poptr1|595817  
Poptr1|586709  
Poptr1|584842  
Poptr1|597686  
AT4G27070.1,AT5G54810.1 Poptr1|56018,Poptr1|56813  
AT5G28237.1 Poptr1|698854  
Poptr1|109244  
Poptr1|108994  
AT3G01810.1 Poptr1|565057,Poptr1|697929,Poptr1|706951  
AT2G42320.1,AT3G57780.1 Poptr1|734954  
AT5G43220.1  
AT5G43230.1  
AT5G06930.1  
Poptr1|583606  
AT5G64550.1 Poptr1|693784,Poptr1|640805  
AT1G64140.1 Poptr1|350294,Poptr1|709230  
AT5G09670.1  
AT3G27770.1 Poptr1|64781,Poptr1|57601  
AT2G47115.1 Poptr1|552585,Poptr1|572554  
AT5G62960.1  
AT3G62410.1,AT2G47400.1 Poptr1|692261,Poptr1|731704  
AT1G76560.1 Poptr1|46804,Poptr1|642747  
AT3G22880.1 Poptr1|55104  
AT5G20850.1 Poptr1|589354  
Poptr1|564887  
AT1G76490.1 Poptr1|693044,Poptr1|694924  
Poptr1|671577  
Poptr1|687636,Poptr1|686577,Poptr1|49474,Poptr1|595031  
AT5G04800.1,AT2G05220.1,AT3G10610.1,AT2G04390.1 Poptr1|592978,Poptr1|563545  
AT4G29080.1 Poptr1|64037,Poptr1|711734,Poptr1|584053  
AT4G14550.1,AT3G23050.1 Poptr1|658430,Poptr1|720961  
AT1G04550.2,AT2G33310.2 Poptr1|725947,Poptr1|354624  
AT4G28640.1 Poptr1|645563  
AT3G15540.1 Poptr1|63754,Poptr1|685029,Poptr1|640677  
AT5G65670.1 Poptr1|643908  
AT4G32280.1 Poptr1|578920,Poptr1|351587,Poptr1|561907  
AT1G04240.1,AT5G43700.1  
Poptr1|564913,Poptr1|595419,Poptr1|694737,Poptr1|726441,Poptr1|346904,Poptr1|662927  
AT1G15050.1,AT2G01200.2 Poptr1|55252  
AT3G04730.1 Poptr1|651846,Poptr1|687970,Poptr1|643213  
AT2G46990.1,AT3G62100.1 Poptr1|664248,Poptr1|644939  
AT1G51950.1,AT3G16500.1 Poptr1|640933  
AT1G04250.1  
AT1G04100.1  
AT1G52830.1  
AT1G15580.1  
AT2G22670.1  
AT3G23030.1,AT4G14560.1  
AT3G17600.1  
AT5G25890.1  
Poptr1|640676  
Poptr1|577918,Poptr1|646006,Poptr1|561730  
AT3G49910.1 Poptr1|715963,Poptr1|682075,Poptr1|682323  
AT5G67510.1  
AT2G30530.1 Poptr1|571938  
AT4G02800.1 Poptr1|714963  
Poptr1|710144  
AT2G39460.1,AT3G55280.1 Poptr1|650312,Poptr1|656035,Poptr1|682652  
Poptr1|641249  
Poptr1|576598,Poptr1|561506  
AT1G12390.1,AT1G62880.1 Poptr1|646501,Poptr1|704228  
AT3G12180.1 Poptr1|576307,Poptr1|583611  
AT1G12340.1  
AT4G12090.1  
AT5G13210.1,AT3G24780.1 Poptr1|350563  
AT5G43390.1,AT5G43400.1  
Poptr1|554714  
AT5G28060.1,AT3G04920.1 Poptr1|703642,Poptr1|720898,Poptr1|47264,Poptr1|570983  
AT5G01450.1 Poptr1|735835,Poptr1|560911,Poptr1|64257  
AT2G38185.4  
AT2G38220.1  
Poptr1|592022  
Poptr1|587049  
AT3G26100.2 Poptr1|574713  
AT1G65920.1 Poptr1|545539,Poptr1|592818  
AT3G02300.1 Poptr1|60931  
AT5G63860.1 Poptr1|718641  
AT5G19420.1,AT5G12350.1 Poptr1|691503,Poptr1|697454  
AT3G02510.1,AT5G16040.1 Poptr1|690092  
AT3G23270.1,AT4G14370.1 Poptr1|354582  
AT3G15430.1 Poptr1|660977,Poptr1|703960



AT1G27060.1 Poptr1|575469  
AT1G76950.1,AT3G47660.1,AT5G60870.1 Poptr1|559354,Poptr1|746227,Poptr1|710838  
AT5G08710.1  
AT1G69710.1  
AT5G42140.1  
Poptr1|569586  
Poptr1|555037,Poptr1|547820  
Poptr1|680778  
AT4G35785.2 Poptr1|741196  
Poptr1|63518  
AT1G16610.1 Poptr1|687635  
AT1G79100.1  
AT2G20050.1 Poptr1|669349  
AT3G06270.1 Poptr1|565683,Poptr1|696269  
Poptr1|669350  
AT1G68520.1,AT1G25440.1 Poptr1|658893  
Poptr1|742447  
AT2G37410.1 Poptr1|96928,Poptr1|565047,Poptr1|48388  
AT1G20350.1  
AT5G11690.1  
Poptr1|565884  
AT5G26570.1 Poptr1|645328,Poptr1|664666  
Poptr1|645327  
Poptr1|664664  
Poptr1|664665,Poptr1|645326  
Poptr1|645325  
AT5G62410.1,AT3G47460.1 Poptr1|590177,Poptr1|343541  
AT5G48600.1 Poptr1|736327  
AT3G28925.1  
Poptr1|584608  
AT3G01820.1 Poptr1|681848  
AT2G37250.1 Poptr1|563806  
AT2G39270.1  
Poptr1|733573  
Poptr1|570237  
AT1G07660.1 Poptr1|748855  
AT2G28740.1  
AT1G07820.1  
AT5G59690.1  
AT3G45930.1  
AT5G59970.1  
AT3G46320.1  
AT3G53730.1  
Poptr1|659786  
Poptr1|659784  
Poptr1|593858  
Poptr1|670620  
Poptr1|682445  
Poptr1|552012  
Poptr1|669446  
Poptr1|578598  
Poptr1|655455  
Poptr1|689130  
Poptr1|563268  
Poptr1|593861  
Poptr1|578600  
Poptr1|655445  
AT1G26110.1 Poptr1|686343,Poptr1|698266  
Poptr1|743690,Poptr1|556152  
AT2G27100.1 Poptr1|679868,Poptr1|648999  
Poptr1|648998,Poptr1|679869  
Poptr1|648996  
AT4G25440.1,AT5G51980.2 Poptr1|687864,Poptr1|734107  
AT5G49200.1,AT5G40880.1  
Poptr1|731002  
AT1G79460.1 Poptr1|564162  
Poptr1|564165  
AT5G48460.1 Poptr1|553250  
AT5G55400.1,AT4G26700.1 Poptr1|57332,Poptr1|687524,Poptr1|49373  
AT2G04750.1,AT5G35700.1  
AT1G12060.1 Poptr1|575961  
AT2G46240.1 Poptr1|348036  
Poptr1|350586  
AT2G18510.1 Poptr1|686078,Poptr1|104548  
AT1G01080.2 Poptr1|731454  
AT2G35410.1 Poptr1|590020  
AT4G09040.1 Poptr1|716445  
AT1G71770.1,AT1G22760.1 Poptr1|551276,Poptr1|559437,Poptr1|559435  
AT3G52150.1 Poptr1|722723  
AT3G46020.1 Poptr1|641237  
AT1G60000.1 Poptr1|658070,Poptr1|657316  
AT5G50250.1,AT4G24770.1 Poptr1|699399,Poptr1|700968

AT1G49760.1 Poptr1|692536,Poptr1|557410,Poptr1|703134,Poptr1|691734  
AT3G52380.1 Poptr1|576481,Poptr1|561161  
AT3G53460.1,AT2G37220.1 Poptr1|689385,Poptr1|58106  
AT5G03580.1,AT1G34140.1  
AT3G16380.1  
AT4G34110.1  
AT2G23350.1  
AT2G15500.1  
AT3G19350.1  
AT2G36660.1  
Poptr1|679253  
Poptr1|706850  
AT1G24610.1 Poptr1|345326  
Poptr1|354294  
AT4G40000.1,AT2G22400.1 Poptr1|685974  
Poptr1|71614  
Poptr1|576798  
AT3G10980.1,AT5G05350.1 Poptr1|577107  
Poptr1|567196  
AT5G19680.1 Poptr1|705124,Poptr1|578523  
AT5G53110.1 Poptr1|569515,Poptr1|574790  
AT2G25410.1 Poptr1|552270  
AT1G28040.1  
AT5G36001.1  
Poptr1|579166  
AT2G42005.1,AT4G38250.1 Poptr1|54249,Poptr1|679959  
Poptr1|51819  
AT5G63190.1 Poptr1|575276,Poptr1|570193  
AT1G22730.1 Poptr1|559445  
AT4G24800.1  
AT3G48390.1  
Poptr1|551266  
AT4G11810.1,AT4G22990.1 Poptr1|343599  
AT1G63010.1  
Poptr1|640555  
Poptr1|640556  
AT4G32551.1 Poptr1|695011,Poptr1|689027  
AT2G32700.1 Poptr1|63057,Poptr1|684771  
Poptr1|545285,Poptr1|692084  
AT4G11710.1,AT3G25720.1,AT4G04650.1,AT4G10613.1,AT1G33710.1,AT1G60720.1,AT1G43730.1  
Poptr1|62649,Poptr1|579895,Poptr1|98895,Poptr1|588496,Poptr1|588671,Poptr1|590892,Poptr1|583454,  
Poptr1|593347,Poptr1|353091,Poptr1|588305,Poptr1|593204,Poptr1|583734,Poptr1|101641,Poptr1|593714,Poptr1|58  
7780,Poptr1|98801,Poptr1|591397,Poptr1|588674,Poptr1|597477,Poptr1|563404,Poptr1|588538,Poptr1|105813,Poptr  
1|583452,Poptr1|591198,Poptr1|106523,Poptr1|588424,Poptr1|583456,Poptr1|571591,Poptr1|100383,Poptr1|99635,P  
optr1|585263,Poptr1|588198,Poptr1|100021,Poptr1|99085,Poptr1|585417,Poptr1|596887,Poptr1|591197,Poptr1|10001  
4,Poptr1|588672,Poptr1|355696,Poptr1|588418,Poptr1|587127,Poptr1|101203,Poptr1|100549,Poptr1|573495,Poptr1|6  
2650,Poptr1|584769,Poptr1|553367,Poptr1|584819,Poptr1|583959,Poptr1|583458,Poptr1|581574,Poptr1|107047,Poptr  
1|97967,Poptr1|100933,Poptr1|580268,Poptr1|355659,Poptr1|588447,Poptr1|571586,Poptr1|98915,Poptr1|98907,Pop  
ptr1|351081,Poptr1|99112,Poptr1|66017,Poptr1|681681,Poptr1|584219,Poptr1|99072,Poptr1|355695,Poptr1|100018,P  
optr1|555161,Poptr1|106280,Poptr1|581437,Poptr1|595350,Poptr1|107779,Poptr1|584285,Poptr1|573807,Poptr1|584  
394,Poptr1|99075,Poptr1|588051,Poptr1|590259,Poptr1|588426,Poptr1|573287,Poptr1|597573,Poptr1|582440,Poptr1|  
351084,Poptr1|584392,Poptr1|101111,Poptr1|587149,Poptr1|355660,Poptr1|585419,Poptr1|582353,Poptr1|583453,Pop  
ptr1|106428,Poptr1|571565,Poptr1|99383,Poptr1|669975,Poptr1|584767,Poptr1|353087,Poptr1|585424,Poptr1|58748  
1,Poptr1|568498,Poptr1|586915,Poptr1|573497,Poptr1|571567,Poptr1|573289,Poptr1|99501,Poptr1|103128,Poptr1|58  
5178,Poptr1|580269,Poptr1|583736,Poptr1|573817,Poptr1|591254,Poptr1|588308,Poptr1|650572,Poptr1|588130,Poptr  
1|584389,Poptr1|580225,Poptr1|101660,Poptr1|583457,Poptr1|588492,Poptr1|563405,Poptr1|586284  
AT1G43760.1  
Poptr1|590770,Poptr1|592546,Poptr1|586917,Poptr1|584833,Poptr1|583333,Poptr1|585130,Poptr1|58847  
7,Poptr1|577869,Poptr1|580226,Poptr1|587483,Poptr1|586278,Poptr1|98913,Poptr1|106278,Poptr1|584224,Poptr1|58  
3949,Poptr1|588129,Poptr1|103524,Poptr1|99658,Poptr1|587150,Poptr1|584200,Poptr1|571571,Poptr1|105678,Poptr  
1|587749,Poptr1|573496,Poptr1|584225,Poptr1|577870,Poptr1|585217,Poptr1|579754,Poptr1|584822,Poptr1|571572,  
Poptr1|588536,Poptr1|106236,Poptr1|587783,Poptr1|592154,Poptr1|585271,Poptr1|590826,Poptr1|573806,Poptr1|57  
7874,Poptr1|573819,Poptr1|100684,Poptr1|573799,Poptr1|585429,Poptr1|558381  
AT3G49280.1,AT1G62890.1,AT1G54955.1,AT3G17200.1,AT1G47783.1,AT1G19030.1,AT5G13655.1,AT1G35570.1,A  
T4G05145.1,AT1G32390.1,AT2G40680.1,AT1G21330.1,AT5G52065.1,AT5G41505.1  
AT2G02520.1,AT5G18880.1,AT5G16486.1  
AT5G32613.1,AT2G07760.1  
AT3G43760.1,AT1G43570.1  
Poptr1|585978,Poptr1|595634,Poptr1|579642,Poptr1|108950,Poptr1|587412,Poptr1|586920,Poptr1|58482  
7,Poptr1|585228,Poptr1|355671,Poptr1|355677,Poptr1|584066,Poptr1|588128,Poptr1|585270,Poptr1|98785,Poptr1|99  
423,Poptr1|577858,Poptr1|99092,Poptr1|591373,Poptr1|586165,Poptr1|577860,Poptr1|584830,Poptr1|587257,Poptr1|  
99067,Poptr1|571568,Poptr1|99618,Poptr1|591157,Poptr1|588021  
Poptr1|588425,Poptr1|571726,Poptr1|588041  
Poptr1|108685  
Poptr1|571577,Poptr1|100811,Poptr1|109194,Poptr1|100393,Poptr1|571579,Poptr1|106053,Poptr1|10110  
3,Poptr1|584388  
Poptr1|588197,Poptr1|590858,Poptr1|61301,Poptr1|591095,Poptr1|107440,Poptr1|591159,Poptr1|98914,P  
optr1|571570,Poptr1|573821,Poptr1|98775,Poptr1|63578,Poptr1|61298,Poptr1|587104  
Poptr1|584377,Poptr1|586144,Poptr1|580258  
Poptr1|550693,Poptr1|591398  
Poptr1|583331,Poptr1|56819,Poptr1|100270,Poptr1|584050,Poptr1|571237,Poptr1|581639,Poptr1|587226  
Poptr1|100125,Poptr1|596541,Poptr1|585229

Poptr1|101642,Poptr1|588200,Poptr1|355663,Poptr1|571725  
 Poptr1|557297  
 AT2G33990.1 Poptr1|660696,Poptr1|693967,Poptr1|707781,Poptr1|568750  
 AT3G51380.1 Poptr1|356820  
 AT1G17480.1,AT1G72670.1 Poptr1|561640,Poptr1|577837,Poptr1|343266  
 AT3G22190.1 Poptr1|558227,Poptr1|48931  
 AT5G13460.1 Poptr1|100701  
 AT5G35670.1 Poptr1|700602  
 AT3G16490.1 Poptr1|548923  
 AT4G14750.1 Poptr1|566198,Poptr1|564871  
 AT3G49260.1 Poptr1|574741,Poptr1|699575  
 AT3G52290.1 Poptr1|702713,Poptr1|698642,Poptr1|576656  
 AT5G03960.1 Poptr1|576228,Poptr1|717571  
 AT3G15050.1  
 AT2G26180.1  
 AT1G51960.1  
 AT5G03040.1,AT3G09710.1  
 AT2G26410.1  
 Poptr1|597674  
 Poptr1|571017  
 AT1G04300.1,AT5G43560.1 Poptr1|696372,Poptr1|726390  
 AT4G16045.1  
 AT5G52330.1  
 AT2G14255.1 Poptr1|65345  
 AT2G14250.1 Poptr1|49341  
 AT5G20350.1 Poptr1|98743  
 Poptr1|578854  
 Poptr1|578856  
 AT4G27780.1,AT5G53470.1 Poptr1|661551,Poptr1|732843  
 AT5G06580.1 Poptr1|576442  
 Poptr1|576445  
 Poptr1|587351  
 Poptr1|561192  
 Poptr1|585008  
 Poptr1|667560  
 AT2G02140.1,AT2G02130.1,AT5G63660.1,AT2G02100.1,AT2G02120.1,AT1G61070.1  
 Poptr1|665236,Poptr1|671887  
 AT2G31957.1,AT2G31953.1  
 AT2G02147.1  
 AT1G75660.1 Poptr1|715413,Poptr1|346711  
 AT1G54490.1 Poptr1|595465,Poptr1|729786  
 AT5G42540.1  
 Poptr1|571322  
 AT3G18440.1 Poptr1|60041  
 AT2G17470.1,AT1G68600.1,AT1G25480.1 Poptr1|354152  
 AT1G18420.1  
 Poptr1|566647  
 Poptr1|48707,Poptr1|693404  
 AT1G20910.1,AT1G76510.1 Poptr1|710670,Poptr1|73209  
 AT2G17410.1  
 AT1G11390.1 Poptr1|544987,Poptr1|568314  
 AT1G61640.1  
 Poptr1|544986  
 AT3G45770.1 Poptr1|672727  
 AT1G21880.2,AT1G77630.1 Poptr1|692719,Poptr1|694555  
 AT2G17120.1 Poptr1|713449  
 Poptr1|651402  
 AT5G19850.1 Poptr1|555205  
 AT4G36530.2 Poptr1|679213  
 Poptr1|547606  
 AT2G30050.1,AT3G01340.1 Poptr1|345355,Poptr1|575080,Poptr1|726744  
 AT5G51230.1 Poptr1|554593,Poptr1|683627  
 AT4G16810.1,AT4G16845.1,AT2G35670.1 Poptr1|553914  
 Poptr1|597408  
 Poptr1|646155  
 Poptr1|554592  
 Poptr1|646156  
 AT1G74950.1,AT1G19180.1 Poptr1|739191  
 Poptr1|584130,Poptr1|645806  
 AT5G38760.1  
 Poptr1|648341,Poptr1|648348,Poptr1|648346,Poptr1|97049,Poptr1|648335,Poptr1|648343,Poptr1|678670,  
 Poptr1|648336,Poptr1|648345  
 AT3G02480.1,AT5G53820.1  
 AT5G15970.1,AT5G15960.1  
 Poptr1|748355  
 AT4G02660.1,AT1G03060.1 Poptr1|651821  
 Poptr1|551123  
 Poptr1|643248  
 Poptr1|651820,Poptr1|643249  
 Poptr1|651822  
 Poptr1|643247  
 AT1G66580.1,AT1G26910.1,AT1G14320.1 Poptr1|574458,Poptr1|663639

Poptr1|554650  
AT2G38090.1 Poptr1|735744,Poptr1|560884,Poptr1|48983,Poptr1|557961  
AT1G19000.1,AT1G74840.1 Poptr1|570027,Poptr1|354829,Poptr1|700892  
AT2G21650.1 Poptr1|557252,Poptr1|546662  
AT5G08520.1 Poptr1|718986,Poptr1|558651  
AT5G61620.1 Poptr1|63319  
AT1G75250.1,AT1G19510.1 Poptr1|551008,Poptr1|651940  
AT1G49010.1 Poptr1|699484  
AT3G11280.1,AT5G05790.1 Poptr1|659565,Poptr1|656198  
AT5G56840.1 Poptr1|352694  
AT1G70000.1 Poptr1|698007  
AT5G58900.1  
AT5G01200.1  
AT4G39250.1  
AT5G23650.1  
Poptr1|562894  
Poptr1|348141  
Poptr1|710381  
Poptr1|552606,Poptr1|556476,Poptr1|664273  
AT1G03905.1,AT5G44110.1 Poptr1|551020,Poptr1|715207  
AT5G02270.1 Poptr1|350473,Poptr1|351774  
ATCG00190.1 Poptr1|594216  
Poptr1|588755  
Poptr1|560861  
AT2G24100.1,AT4G30780.1 Poptr1|554909,Poptr1|690835,Poptr1|737941,Poptr1|561364  
Poptr1|595262,Poptr1|570717  
AT3G60770.1,AT4G00100.1 Poptr1|662449,Poptr1|666912,Poptr1|663801,Poptr1|552039  
AT2G33840.1 Poptr1|725335,Poptr1|353168  
AT1G28350.1  
AT4G38890.1 Poptr1|697222  
Poptr1|648710  
AT1G55340.1 Poptr1|639620,Poptr1|555192  
Poptr1|571202,Poptr1|573929  
Poptr1|695070,Poptr1|736806  
AT5G54100.1,AT4G27585.1 Poptr1|355437,Poptr1|591452,Poptr1|355440  
Poptr1|590701  
Poptr1|594155  
Poptr1|674968  
Poptr1|661638  
AT5G04130.1,AT3G10270.1 Poptr1|576166,Poptr1|717490  
AT5G04110.1  
Poptr1|107937,Poptr1|597384  
Poptr1|587121  
Poptr1|584677  
AT5G08110.1 Poptr1|61275  
Poptr1|100315,Poptr1|569898  
Poptr1|100323,Poptr1|569897  
AT2G32040.1 Poptr1|55120  
AT5G54860.1 Poptr1|569116,Poptr1|569114  
Poptr1|593413  
AT2G26770.1 Poptr1|54632,Poptr1|49086  
AT3G56480.1,AT2G40820.1 Poptr1|576131,Poptr1|560354  
AT2G33430.1 Poptr1|564971  
AT3G06790.1 Poptr1|686965  
AT1G11430.1 Poptr1|727762  
AT1G32580.1,AT2G35240.1  
Poptr1|725885  
Poptr1|673297  
AT2G43160.1,AT3G59290.1 Poptr1|57288,Poptr1|552810  
AT5G11710.1 Poptr1|685545  
Poptr1|577895  
AT5G04240.1 Poptr1|353367,Poptr1|725017  
AT3G48430.1 Poptr1|666581  
Poptr1|662091  
Poptr1|596302  
Poptr1|662090  
AT1G08790.1 Poptr1|595407,Poptr1|571053  
AT2G15590.2,AT4G33985.1 Poptr1|557391  
AT3G04700.1,AT5G28690.1  
AT2G15610.1  
Poptr1|558864,Poptr1|655148  
AT2G18400.1 Poptr1|655315  
AT1G05190.1 Poptr1|572955  
Poptr1|560644  
Poptr1|680806,Poptr1|552789,Poptr1|583588  
AT4G23470.1,AT5G41390.1,AT1G63830.1 Poptr1|646651,Poptr1|640460  
Poptr1|640459,Poptr1|664004,Poptr1|644489  
Poptr1|664003  
Poptr1|644488  
AT1G18450.1 Poptr1|729159,Poptr1|689890  
AT3G33520.1 Poptr1|736541  
AT3G12110.1 Poptr1|576255,Poptr1|561252,Poptr1|641963,Poptr1|687358,Poptr1|719800,Poptr1|746505

AT5G56180.1 Poptr1|49518,Poptr1|708207  
 AT1G13180.1 Poptr1|55030  
 AT3G27000.1 Poptr1|549729  
 AT3G60830.1 Poptr1|649984,Poptr1|706398  
 AT1G73910.1  
 AT2G37620.1,AT3G53750.1  
 AT3G18780.2,AT1G49240.1  
 AT2G42090.1,AT5G09810.1  
 AT5G59370.1,AT3G46520.1  
 AT2G42170.1  
 Poptr1|705510,Poptr1|565112  
 Poptr1|565113  
 AT3G20810.2 Poptr1|48535  
 AT4G13110.1 Poptr1|565677,Poptr1|565291  
 AT1G03350.1  
 Poptr1|577411,Poptr1|578459,Poptr1|579423  
 Poptr1|565678  
 AT5G24240.1 Poptr1|699582  
 AT2G46500.1  
 Poptr1|732892  
 AT1G07380.1 Poptr1|576910  
 AT5G58980.1  
 AT2G38010.2  
 Poptr1|550803  
 Poptr1|650196  
 AT1G08360.1,AT5G22440.1,AT2G27530.1 Poptr1|655205,Poptr1|683275,Poptr1|655215,Poptr1|679931  
 AT1G10050.1,AT1G58370.1 Poptr1|710260  
 AT4G08160.1  
 AT5G55000.2 Poptr1|738511  
 Poptr1|593739  
 AT1G27400.1,AT1G67430.1 Poptr1|570245,Poptr1|720322,Poptr1|565870,Poptr1|575339  
 AT5G53350.1 Poptr1|732873,Poptr1|687706  
 AT1G33360.1  
 AT1G79440.1 Poptr1|724241  
 AT1G23800.1 Poptr1|684248  
 AT1G74920.1 Poptr1|700900,Poptr1|661953  
 AT3G66658.2 Poptr1|696628  
 AT3G48000.1 Poptr1|575137,Poptr1|661983  
 AT1G54100.1 Poptr1|745823,Poptr1|693755  
 AT3G24503.1 Poptr1|58645  
 AT3G48170.1  
 Poptr1|353796  
 Poptr1|581343  
 Poptr1|586766  
 Poptr1|566823  
 Poptr1|587173  
 Poptr1|675617  
 Poptr1|578437  
 AT3G18870.1 Poptr1|546021  
 AT2G36000.1 Poptr1|576526  
 AT2G34620.1 Poptr1|55807  
 AT2G03050.1 Poptr1|567030  
 Poptr1|585638,Poptr1|653678  
 Poptr1|353854  
 AT1G61260.1 Poptr1|555510,Poptr1|687497  
 AT1G11220.1,AT1G11230.1,AT1G11210.1  
 Poptr1|580599,Poptr1|568971,Poptr1|582096  
 AT1G58250.1,AT5G49680.1,AT5G49670.1 Poptr1|551707  
 Poptr1|643941  
 Poptr1|72170  
 Poptr1|643939  
 Poptr1|558982,Poptr1|643940  
 Poptr1|558980  
 Poptr1|585449  
 AT3G60250.1,AT2G44680.1 Poptr1|684377,Poptr1|677648  
 AT5G47080.1,AT4G17640.1  
 AT2G26900.1 Poptr1|737536  
 AT1G78560.1 Poptr1|690484  
 Poptr1|583528  
 Poptr1|550354  
 AT4G15880.1 Poptr1|697827,Poptr1|587320  
 AT4G00690.1  
 AT3G06910.1  
 Poptr1|593624  
 AT2G24200.1,AT4G30920.1,AT4G30910.1 Poptr1|578744,Poptr1|344492  
 Poptr1|109153  
 AT4G39540.1,AT2G21940.2 Poptr1|558622,Poptr1|695927  
 AT3G26900.1 Poptr1|703893  
 Poptr1|347063  
 Poptr1|593288  
 AT3G11760.1 Poptr1|352163  
 AT5G04860.1 Poptr1|55680,Poptr1|563532

AT2G10560.1  
Poptr1|669059  
Poptr1|595960  
Poptr1|583103  
AT4G21990.1,AT4G04610.1,AT1G62180.1 Poptr1|588813  
Poptr1|572967  
Poptr1|348612  
AT1G05620.1 Poptr1|654333  
AT2G36310.1 Poptr1|717449  
AT1G27990.1 Poptr1|712441,Poptr1|548050  
AT5G52420.1 Poptr1|688626,Poptr1|356217  
AT5G23920.1  
AT1G56430.1,AT5G56080.1,AT1G09240.1,AT5G04950.1 Poptr1|581960  
Poptr1|659072  
Poptr1|566810  
Poptr1|566809  
Poptr1|578616,Poptr1|594900  
Poptr1|566812  
AT3G22200.1 Poptr1|652454,Poptr1|734565  
Poptr1|107853  
Poptr1|108816  
Poptr1|587878,Poptr1|107515  
AT3G26560.1 Poptr1|569452,Poptr1|586590  
AT1G33390.1 Poptr1|552479  
AT2G47680.1 Poptr1|741453  
AT5G13010.1 Poptr1|659337  
AT4G18465.1 Poptr1|693966  
AT4G01020.1,AT5G10370.1 Poptr1|71598  
AT1G26370.1 Poptr1|564308  
AT2G47250.1,AT3G62310.1 Poptr1|57166,Poptr1|348376  
AT5G14900.1  
Poptr1|586594  
Poptr1|580733  
Poptr1|580734  
Poptr1|679563  
Poptr1|679561  
Poptr1|659338  
Poptr1|567085  
Poptr1|65139  
Poptr1|549187  
AT5G53045.1 Poptr1|666115,Poptr1|661540  
AT1G54110.1,AT3G55600.1 Poptr1|578973  
AT3G19420.1,AT3G50110.1 Poptr1|707340  
AT5G39400.1 Poptr1|577703  
Poptr1|562929  
Poptr1|594404,Poptr1|722258  
Poptr1|719195  
AT1G16860.1,AT1G78880.1 Poptr1|725259,Poptr1|563449,Poptr1|563448,Poptr1|567788  
Poptr1|568174  
AT5G66760.1 Poptr1|53373,Poptr1|593943  
AT2G18450.1  
AT4G11150.1,AT1G64200.1 Poptr1|674027,Poptr1|663024  
AT3G08560.1 Poptr1|734387  
AT1G47980.1 Poptr1|353996  
AT3G62730.1 Poptr1|642406  
Poptr1|106305  
Poptr1|106306  
AT2G35040.1 Poptr1|687164  
Poptr1|593357,Poptr1|592583,Poptr1|640874  
Poptr1|656893  
Poptr1|674267  
Poptr1|553489,Poptr1|593232  
Poptr1|657854  
ATCG01100.1 Poptr1|748815  
ATMG01275.1,AT2G07785.1,ATMG00516.1,ATMG01120.1 Poptr1|592099,Poptr1|747653  
Poptr1|561063,Poptr1|580213  
Poptr1|589387  
Poptr1|748946  
Poptr1|593465  
AT3G17365.1 Poptr1|698357  
AT1G47230.2,AT1G47210.2,AT5G43080.1 Poptr1|709971,Poptr1|592021  
AT5G25380.1,AT5G11300.1 Poptr1|58529,Poptr1|685523  
AT1G16330.1 Poptr1|564169,Poptr1|567093  
AT1G44110.1 Poptr1|72495  
AT1G14750.1 Poptr1|566417  
AT1G34460.1,AT3G11520.1,AT5G06150.1 Poptr1|560353,Poptr1|688677  
AT1G20610.1,AT1G76310.1 Poptr1|652211  
AT2G26760.1 Poptr1|64600  
AT4G35620.1,AT2G17620.1 Poptr1|694393  
AT1G15570.1,AT1G80370.1 Poptr1|548650,Poptr1|343332  
AT2G01310.1  
AT1G47220.1

AT1G77390.1  
AT4G37490.1  
AT1G20590.1  
    Poptr1|107993,Poptr1|583990  
    Poptr1|594995,Poptr1|721275,Poptr1|642820  
AT1G19360.1,AT1G75110.1    Poptr1|347728,Poptr1|722087  
AT5G09995.2    Poptr1|562699  
AT1G08530.1    Poptr1|571149,Poptr1|729932  
    Poptr1|565484  
    Poptr1|585609,Poptr1|102107  
    Poptr1|585608  
AT4G15530.1    Poptr1|565688  
    Poptr1|657941  
AT4G02450.1    Poptr1|643409,Poptr1|559448  
AT3G03773.1    Poptr1|573963,Poptr1|580974  
AT4G12600.1,AT4G22380.1    Poptr1|592198,Poptr1|738881  
AT5G20160.2  
AT2G10950.1    Poptr1|702292,Poptr1|560567  
AT3G49800.1,AT5G65910.1    Poptr1|571988  
AT1G10720.1    Poptr1|572018  
    Poptr1|655535  
AT5G56710.1,AT2G19740.1,AT4G26230.1    Poptr1|641386,Poptr1|690320,Poptr1|722746  
AT1G27000.1    Poptr1|566293,Poptr1|657115  
AT1G04960.1    Poptr1|645036,Poptr1|573037  
AT1G44674.1  
AT2G02730.1  
    Poptr1|552719  
AT2G30060.1,AT1G07140.1    Poptr1|691513,Poptr1|557663  
AT5G58590.1  
    Poptr1|717428,Poptr1|735903  
AT5G57140.1    Poptr1|351662,Poptr1|351660  
AT5G63140.1    Poptr1|664218,Poptr1|672103,Poptr1|644693  
AT2G46880.1  
    Poptr1|644690  
AT1G32440.1    Poptr1|739995,Poptr1|580106  
AT5G08570.1,AT5G63680.1    Poptr1|725208,Poptr1|719940  
AT1G50020.1    Poptr1|707462,Poptr1|697397  
AT3G22960.1    Poptr1|687085,Poptr1|686233  
AT5G52920.1    Poptr1|569454  
AT2G36580.1,AT3G52990.1    Poptr1|589553  
AT4G26390.1,AT5G56350.1    Poptr1|693136,Poptr1|48424  
    Poptr1|346918  
    Poptr1|559622  
    Poptr1|49331  
    Poptr1|559621  
    Poptr1|720489,Poptr1|698714  
    Poptr1|576765  
    Poptr1|563648  
    Poptr1|578193  
    Poptr1|576767  
    Poptr1|582013  
    Poptr1|104758  
AT1G54710.1    Poptr1|595540,Poptr1|729689  
AT5G54730.1    Poptr1|569070,Poptr1|571477  
AT1G03380.1  
AT4G32870.1    Poptr1|108184,Poptr1|561737,Poptr1|561736,Poptr1|591276  
    Poptr1|578038  
AT2G45070.1,AT3G60540.1    Poptr1|552006,Poptr1|591674  
AT5G60460.1    Poptr1|697734  
AT5G10870.1    Poptr1|58596  
AT3G29200.1    Poptr1|701854  
AT1G69370.1  
AT1G06930.1    Poptr1|574504,Poptr1|571893,Poptr1|577146,Poptr1|560976,Poptr1|357056  
AT5G01790.1  
AT2G40475.1  
AT5G59750.1    Poptr1|691426  
AT5G64300.1    Poptr1|691717,Poptr1|562552  
AT2G22450.1  
    Poptr1|105072  
    Poptr1|71599  
AT1G05510.1,AT2G31985.1    Poptr1|572908  
AT4G18920.1,AT5G45690.1,AT1G29680.1  
    Poptr1|553081  
AT3G04230.1,AT5G18380.1,AT2G09990.1    Poptr1|720829,Poptr1|726607,Poptr1|691732  
AT5G52540.1    Poptr1|714251  
AT5G24000.1    Poptr1|101469,Poptr1|592857  
    Poptr1|594072  
    Poptr1|567141  
AT4G01985.1    Poptr1|354022,Poptr1|659096  
AT5G61660.1  
    Poptr1|593371,Poptr1|580526,Poptr1|590015,Poptr1|563663,Poptr1|568046,Poptr1|575517,Poptr1|63971,  
Poptr1|597246,Poptr1|588168,Poptr1|639993,Poptr1|655827,Poptr1|63960,Poptr1|63958,Poptr1|63945,Poptr1|35331

4,Poptr1|595552  
 AT4G36020.1,AT2G17870.1  
     Poptr1|559203,Poptr1|54394,Poptr1|551490,Poptr1|349857,Poptr1|556614,Poptr1|593836  
 AT2G21660.1,AT4G39260.1    Poptr1|722024,Poptr1|712972  
 AT1G04660.1    Poptr1|553256  
 AT5G58470.1    Poptr1|683890,Poptr1|686786  
 AT4G30460.1    Poptr1|578681,Poptr1|561381  
 AT4G16240.1  
 AT1G15830.1  
 AT1G04800.1  
 AT1G76965.1  
 AT5G07540.1  
 AT5G07530.1  
 AT2G11005.1,AT1G62240.1  
 AT5G46730.1  
 AT2G05440.2  
 AT2G30560.1  
 AT3G15400.1  
 AT3G42130.1  
 AT2G05540.1,AT2G05380.1,AT4G38680.1,AT2G05510.1,AT2G05520.1,AT2G05530.1  
 AT2G21060.1  
 AT2G14160.1  
 AT4G29020.1  
 AT4G29030.1  
 AT3G24250.1  
 AT4G30450.1  
     Poptr1|75544  
     Poptr1|104747  
     Poptr1|104706,Poptr1|354602  
     Poptr1|352529  
     Poptr1|670089,Poptr1|547957  
     Poptr1|109315  
     Poptr1|595956,Poptr1|354081  
     Poptr1|704469  
     Poptr1|550556  
     Poptr1|645459  
     Poptr1|554816,Poptr1|547987  
     Poptr1|348615  
     Poptr1|669512  
 AT5G63700.1    Poptr1|65185  
 AT5G08430.1,AT2G16480.1,AT2G18090.1,AT3G51120.1  
     Poptr1|556277,Poptr1|556531,Poptr1|593044,Poptr1|593878,Poptr1|557178,Poptr1|563248,Poptr1|56846  
 9  
 AT2G16485.1  
 AT2G16470.1  
     Poptr1|568468,Poptr1|648421  
 AT3G06350.1    Poptr1|565769  
     Poptr1|565260  
     Poptr1|570919  
     Poptr1|742170,Poptr1|699791,Poptr1|688279  
     Poptr1|572756  
 AT1G18500.1,AT1G74040.1    Poptr1|71714  
 AT5G23010.1,AT5G23020.1  
 AT1G73390.1,AT1G17940.1    Poptr1|704988,Poptr1|647779  
 AT5G14020.1    Poptr1|65014  
 AT3G06810.1    Poptr1|725646  
     Poptr1|579897,Poptr1|565554,Poptr1|587875  
     Poptr1|680703,Poptr1|596106  
     Poptr1|742349  
     Poptr1|597459  
 AT2G26080.1,AT4G33010.1    Poptr1|685558  
     Poptr1|577943  
     Poptr1|670531  
     Poptr1|577945  
 AT3G11710.1    Poptr1|705281,Poptr1|578577,Poptr1|743408  
 AT3G13490.1  
 AT2G35190.1    Poptr1|580146,Poptr1|739850  
 AT1G48240.1,AT3G17440.1    Poptr1|725534  
 AT2G41040.1    Poptr1|578828,Poptr1|583638  
 AT1G78140.1    Poptr1|643750,Poptr1|651292  
     Poptr1|559114  
 AT3G03160.1,AT5G17190.1    Poptr1|720712,Poptr1|726821  
 AT1G48440.1,AT3G17780.1    Poptr1|670735,Poptr1|661346  
     Poptr1|57551  
 AT4G19450.1,AT5G45275.1    Poptr1|356767,Poptr1|343533  
 AT2G16660.1,AT4G34950.1    Poptr1|557097,Poptr1|694226  
 AT1G80530.1    Poptr1|592676,Poptr1|48869,Poptr1|583643  
 AT2G39210.1    Poptr1|353332  
 AT3G01930.2,AT5G14120.1    Poptr1|356065  
 AT2G34355.1,AT1G18940.1,AT1G74780.1    Poptr1|575062  
 AT3G01630.1,AT1G31470.1  
 AT5G50630.1,AT5G50520.1



AT2G34350.1  
     Poptr1|575551  
     Poptr1|596636  
     Poptr1|576664  
     Poptr1|593832  
     Poptr1|592677  
     Poptr1|103444,Poptr1|592678  
     Poptr1|347723  
     Poptr1|597129  
     Poptr1|591065,Poptr1|707038,Poptr1|597130  
     Poptr1|641824  
     Poptr1|681362  
     Poptr1|355806  
 AT1G48790.1           Poptr1|732998  
 AT1G10600.1           Poptr1|687064  
     Poptr1|569810  
 AT4G39860.1           Poptr1|694315,Poptr1|562605  
 AT1G78150.1           Poptr1|685266,Poptr1|710987  
 AT2G22270.1  
 AT1G35780.1  
 AT5G04710.1           Poptr1|563591  
 AT5G60160.1           Poptr1|346003,Poptr1|575322  
 AT3G48770.1           Poptr1|575424,Poptr1|570318  
 AT3G28020.1  
     Poptr1|106158,Poptr1|103847,Poptr1|107960,Poptr1|575414,Poptr1|583906  
     Poptr1|575426,Poptr1|575415  
     Poptr1|356109  
 AT5G48660.1,AT3G07190.1   Poptr1|692065,Poptr1|665072  
 AT5G42570.1           Poptr1|568053,Poptr1|746144  
 AT3G20450.1,AT1G11905.1  
     Poptr1|664749  
 AT5G57890.1,AT1G25155.1,AT1G24807.1,AT1G25220.1,AT1G24909.1,AT1G25083.1  
     Poptr1|354335,Poptr1|566399  
     Poptr1|61931  
 AT5G05950.1           Poptr1|567342  
 AT3G07510.1           Poptr1|645382,Poptr1|573188  
 AT3G46890.1  
 AT2G01580.1  
     Poptr1|54727  
     Poptr1|700670,Poptr1|573194  
 AT3G46940.1           Poptr1|691990  
     Poptr1|586027,Poptr1|583924  
     Poptr1|588106  
     Poptr1|573265  
     Poptr1|665046  
     Poptr1|573268  
     Poptr1|582395  
 AT5G20920.1           Poptr1|700090,Poptr1|574465  
 AT3G07920.1  
 AT5G01940.1  
     Poptr1|104247  
 AT3G52060.1           Poptr1|353232  
 AT5G11730.1,AT5G25970.1   Poptr1|695068,Poptr1|577893  
 AT4G30060.1,AT2G19160.1   Poptr1|652880  
 AT5G22070.1           Poptr1|64155  
 AT1G62305.1,AT1G11940.1   Poptr1|348605  
 AT5G14550.1           Poptr1|691558  
 AT5G16170.1           Poptr1|546476  
 AT1G51770.1,AT3G21310.1   Poptr1|580253  
 AT1G68380.1,AT1G68390.1   Poptr1|566591,Poptr1|574922,Poptr1|354195  
 AT4G32290.1  
 AT5G25990.1  
 AT4G25870.1,AT5G57270.1  
 AT4G31350.1  
 AT5G25330.1  
 AT1G73810.1  
     Poptr1|660122  
     Poptr1|597469  
     Poptr1|574412  
     Poptr1|103250  
 AT1G67280.1           Poptr1|673159  
 AT1G11840.1           Poptr1|713477  
     Poptr1|689109  
     Poptr1|344669  
 ATCG00490.1           Poptr1|571563  
     Poptr1|571588  
     Poptr1|582855,Poptr1|571564  
     Poptr1|587492  
     Poptr1|106296  
 AT2G45290.1,AT3G60750.1   Poptr1|552034  
     Poptr1|589759  
     Poptr1|730853

Poptr1|353368  
 AT3G52580.1,AT3G11510.1,AT2G36160.1 Poptr1|727836,Poptr1|648403,Poptr1|558193  
 Poptr1|641003  
 AT4G31780.2 Poptr1|689075,Poptr1|694952  
 AT5G20410.1 Poptr1|60912,Poptr1|578871  
 AT2G11810.1  
 AT4G19880.2 Poptr1|575616  
 AT5G44000.1 Poptr1|665075  
 AT5G45020.1  
 AT5G44990.1  
 AT1G60010.1,AT1G10530.1 Poptr1|566326,Poptr1|657091  
 AT5G67620.1 Poptr1|696197  
 AT5G50090.1  
 Poptr1|663685  
 AT3G61110.1 Poptr1|548120  
 AT2G45710.1  
 AT5G47930.1  
 Poptr1|554670  
 AT4G22920.1,AT4G11910.1 Poptr1|554288,Poptr1|548540  
 AT1G44000.1  
 Poptr1|640574  
 AT4G34570.1,AT2G16370.1 Poptr1|648629  
 AT2G21550.1  
 Poptr1|582017  
 Poptr1|673370  
 Poptr1|673535,Poptr1|649387  
 Poptr1|694796  
 AT5G34930.1 Poptr1|583659  
 AT1G15710.1 Poptr1|597623  
 Poptr1|696760  
 Poptr1|594039  
 AT4G34260.1 Poptr1|707380,Poptr1|557461  
 Poptr1|65242  
 Poptr1|549960  
 Poptr1|557464  
 Poptr1|584167  
 Poptr1|557462  
 AT4G34740.1,AT2G16570.1 Poptr1|649300,Poptr1|648711  
 AT4G38880.1  
 Poptr1|589803  
 AT4G19540.1 Poptr1|710927,Poptr1|559659  
 AT3G24430.1 Poptr1|578419  
 AT2G26590.1 Poptr1|560698  
 Poptr1|591630,Poptr1|101556,Poptr1|349335  
 Poptr1|669723  
 Poptr1|592669,Poptr1|591631  
 Poptr1|579291  
 Poptr1|578884  
 Poptr1|669724  
 AT2G44080.1,AT3G59900.1 Poptr1|695708,Poptr1|673768  
 AT2G41230.1  
 Poptr1|667305  
 Poptr1|555065  
 Poptr1|560379  
 AT2G39805.1 Poptr1|686470,Poptr1|724612  
 AT3G05280.1,AT5G27490.1 Poptr1|570850,Poptr1|595593  
 AT4G24340.1,AT4G24350.1 Poptr1|673164  
 AT4G28940.1  
 Poptr1|573862,Poptr1|571436,Poptr1|703239,Poptr1|681196,Poptr1|592357,Poptr1|592447,Poptr1|67820  
 2  
 Poptr1|681195  
 AT1G02050.1 Poptr1|551991,Poptr1|59379  
 AT4G34850.1 Poptr1|546176,Poptr1|54407  
 AT5G13930.1 Poptr1|683579,Poptr1|572875,Poptr1|554828,Poptr1|554829  
 AT4G00040.1  
 Poptr1|585734,Poptr1|651385,Poptr1|554827,Poptr1|62886  
 Poptr1|596295  
 Poptr1|662365,Poptr1|591584,Poptr1|107268  
 Poptr1|647332  
 AT1G67020.1  
 Poptr1|562676,Poptr1|571696,Poptr1|558356,Poptr1|105630,Poptr1|586394,Poptr1|561109,Poptr1|55908  
 8,Poptr1|586937,Poptr1|559087,Poptr1|573420,Poptr1|591230,Poptr1|562673,Poptr1|587299,Poptr1|349863  
 AT1G09780.1,AT3G08590.1 Poptr1|589594,Poptr1|688883  
 Poptr1|587025  
 AT5G05480.1 Poptr1|567232,Poptr1|564071  
 AT3G14920.1 Poptr1|568803  
 AT1G17030.1 Poptr1|550345,Poptr1|550347  
 Poptr1|105970  
 Poptr1|574212,Poptr1|693989  
 Poptr1|584899  
 Poptr1|588479  
 AT3G21070.1 Poptr1|691429,Poptr1|557869

Poptr1|582818  
AT1G54520.1 Poptr1|680302  
Poptr1|742067  
Poptr1|564835  
Poptr1|570984  
AT3G51520.1 Poptr1|699186  
ATCG00680.1 Poptr1|568840,Poptr1|747700  
Poptr1|594832  
Poptr1|677440,Poptr1|678859  
Poptr1|552346  
Poptr1|597225  
AT2G21950.1 Poptr1|75839  
AT2G22030.1,AT4G39580.1,AT2G41360.1,AT2G44700.1,AT2G44630.1,AT1G61540.1,AT4G39760.1,AT4G19870.1,AT4G39570.1,AT2G22050.1,AT4G39550.1,AT4G02310.1  
AT2G44030.1,AT4G39560.1,AT5G03000.1,AT4G39290.1,AT4G39600.1,AT4G33900.1,AT3G46050.1,AT5G51250.1,AT4G19865.1,AT4G35120.1,AT5G39560.1,AT4G29370.1,AT4G39590.1,AT5G38680.1,AT1G60570.1,AT5G03020.1,AT5G02990.1,AT5G48990.1,AT4G39240.1,AT5G02980.1,AT4G23580.1  
AT4G39756.1,AT4G11770.1,AT1G19930.1,AT4G39060.1,AT3G06570.1,AT4G39753.1,AT5G48980.1,AT5G28160.1,AT4G19250.1,AT3G43710.1,AT4G11750.1,AT5G28180.1,AT5G49000.1,AT4G19330.1  
AT2G29830.1,AT2G21680.1,AT2G29780.1,AT2G29860.1,AT4G38940.1,AT1G19460.1,AT2G29820.1,AT2G29770.1,AT2G29600.1,AT2G29810.1,AT4G14905.1,AT1G19470.1,AT2G29800.1  
AT4G11745.1  
AT4G36840.1,AT3G24610.1  
AT2G29610.1,AT3G27910.1,AT2G20380.1,AT4G25710.1  
AT3G10510.1  
AT4G05620.1,AT5G38670.1,AT3G08810.1  
AT4G39750.1  
AT4G34170.1  
AT5G03010.1  
AT2G03460.1  
AT1G77880.1  
AT2G28860.1,AT2G34500.1,AT2G28850.1,AT2G34490.1 Poptr1|545798  
AT5G17210.1 Poptr1|689226  
AT5G20490.1 Poptr1|561027  
AT5G54280.1,AT4G27370.1 Poptr1|726962,Poptr1|582092  
AT1G04160.1,AT5G43900.1 Poptr1|696347  
AT1G50360.1,AT3G19960.1 Poptr1|71776,Poptr1|695955  
AT1G17580.1  
AT2G31900.1  
AT4G33200.1  
AT5G20470.1,AT1G54560.1,AT5G20450.1,AT1G08730.1  
AT4G28710.1,AT2G20290.1  
AT1G04600.1,AT2G33240.1  
AT1G42680.1  
Poptr1|681646  
Poptr1|681648  
Poptr1|742904  
Poptr1|343195  
Poptr1|672720  
Poptr1|579393  
AT4G22250.1,AT4G03965.1 Poptr1|99359  
AT3G07120.1 Poptr1|645432  
AT4G13100.1,AT3G25030.1  
Poptr1|593559,Poptr1|552733  
AT5G38610.1 Poptr1|580130  
AT5G46990.1,AT5G46960.1,AT5G46940.1,AT5G46950.1,AT1G54620.1,AT5G46930.1,AT5G46970.1  
Poptr1|580131  
AT5G46980.1  
AT3G52180.1 Poptr1|659974  
AT3G10940.1 Poptr1|573846  
AT1G09020.1 Poptr1|581849,Poptr1|729579  
Poptr1|101185  
Poptr1|101196  
Poptr1|674428  
Poptr1|725820,Poptr1|60583  
AT2G39970.1 Poptr1|724534,Poptr1|656207  
Poptr1|684699  
AT1G13220.2 Poptr1|690086,Poptr1|696593  
AT1G68790.1  
AT1G67230.1  
AT4G26630.1,AT5G55660.1 Poptr1|568583  
AT3G48710.1,AT5G63550.1 Poptr1|699359  
Poptr1|642304  
Poptr1|356096  
AT1G78230.1 Poptr1|651271,Poptr1|643773  
AT4G03260.1 Poptr1|702641,Poptr1|739089,Poptr1|663562  
AT5G50370.1,AT5G63400.1 Poptr1|688530,Poptr1|570233  
AT5G04900.1 Poptr1|563522  
AT4G13250.1 Poptr1|737586  
AT3G50690.1 Poptr1|53368,Poptr1|593953  
AT1G64660.1 Poptr1|691044  
Poptr1|676236,Poptr1|555145,Poptr1|105900,Poptr1|582844,Poptr1|555144

Poptr1|350415  
Poptr1|555143,Poptr1|582845  
AT3G07800.1 Poptr1|645014  
AT5G23070.1  
Poptr1|57849,Poptr1|351230  
Poptr1|562415  
Poptr1|554699  
AT5G65180.1,AT5G10060.1 Poptr1|53204,Poptr1|558582,Poptr1|558584  
AT3G26990.1  
AT3G47640.1 Poptr1|575806,Poptr1|646081  
AT3G19860.2 Poptr1|694208,Poptr1|697213  
AT4G36060.1  
Poptr1|356881  
AT3G13300.1,AT3G13290.1 Poptr1|98119,Poptr1|708158  
Poptr1|349526,Poptr1|560059  
Poptr1|98012  
AT2G29580.1,AT1G07360.1 Poptr1|557972,Poptr1|697606  
AT5G07060.1  
AT5G04210.1  
Poptr1|557975,Poptr1|557976  
AT3G25860.1 Poptr1|720668,Poptr1|566637  
AT1G34430.1 Poptr1|574292,Poptr1|740651  
AT2G13810.1 Poptr1|53435,Poptr1|346373,Poptr1|597767,Poptr1|710171  
AT4G33680.1 Poptr1|557573  
AT1G73480.1,AT1G18360.1 Poptr1|704109,Poptr1|661356  
AT5G11650.1 Poptr1|344658,Poptr1|689009  
Poptr1|597426  
AT1G53900.1,AT1G53880.1 Poptr1|584158,Poptr1|646050  
AT1G72340.1  
AT1G48900.1 Poptr1|701594,Poptr1|641044  
AT5G49500.1  
AT5G66970.1,AT1G15310.1  
Poptr1|596916  
Poptr1|589653  
AT5G05500.1 Poptr1|659473,Poptr1|656285  
AT3G10050.1 Poptr1|689409  
Poptr1|579590  
AT3G63250.1 Poptr1|342292,Poptr1|559589  
AT3G25900.1 Poptr1|698241  
AT3G22740.1 Poptr1|345414,Poptr1|658494  
AT5G35980.1 Poptr1|702470  
Poptr1|663256  
Poptr1|730204  
AT1G61215.1 Poptr1|545029  
AT3G57980.1,AT2G42150.1 Poptr1|547688,Poptr1|583285,Poptr1|351072,Poptr1|547687  
AT2G44430.1  
AT3G63500.2 Poptr1|649995  
AT3G07780.1,AT5G48160.1 Poptr1|573078,Poptr1|552690  
AT1G14740.1 Poptr1|719813  
Poptr1|549294  
AT1G79400.1,AT1G16380.1 Poptr1|555075,Poptr1|555074  
AT3G53720.1 Poptr1|351559  
AT5G01680.1,AT5G01690.1 Poptr1|577087,Poptr1|574538,Poptr1|571863  
AT2G13620.1 Poptr1|562475  
AT2G31910.1,AT1G05580.1 Poptr1|75561  
AT3G52080.1 Poptr1|557790,Poptr1|64534  
AT5G41610.1 Poptr1|709220  
AT1G06970.1,AT2G30240.1  
Poptr1|659292  
Poptr1|562498,Poptr1|567273  
Poptr1|106838,Poptr1|545794  
Poptr1|71530  
Poptr1|650607  
Poptr1|554441  
AT4G17940.1 Poptr1|590027  
AT4G32340.1 Poptr1|561898  
Poptr1|657317  
AT2G29670.1,AT1G07280.1 Poptr1|723097,Poptr1|64282  
AT3G47080.1  
Poptr1|353652  
AT3G02690.1 Poptr1|728535  
Poptr1|575861  
Poptr1|565808  
Poptr1|676942  
Poptr1|580448  
AT2G21270.1 Poptr1|649311  
AT2G29070.2  
AT4G38930.2  
Poptr1|648701  
Poptr1|352228  
AT5G14170.1 Poptr1|549692  
AT3G01890.1

Poptr1|742845  
Poptr1|593537,Poptr1|356042  
AT4G34100.1 Poptr1|65203,Poptr1|557409  
AT4G32670.1  
Poptr1|107844  
AT2G41520.1 Poptr1|576240,Poptr1|560471,Poptr1|64226  
AT5G12430.1  
AT2G18330.1,AT4G36580.1 Poptr1|563169  
AT5G16930.1,AT3G03060.1 Poptr1|65851,Poptr1|569183  
Poptr1|593928  
AT3G51830.1 Poptr1|576990  
AT3G51460.1 Poptr1|716159  
AT5G66020.1  
AT5G45550.1 Poptr1|702972  
Poptr1|689347  
AT1G65380.1 Poptr1|596988  
AT2G19780.1,AT4G29240.1 Poptr1|561102  
AT5G49660.1 Poptr1|711248  
AT3G47570.1,AT5G20480.1,AT3G47580.1,AT3G47090.1,AT3G47110.1  
Poptr1|567669,Poptr1|563689,Poptr1|584895,Poptr1|584898,Poptr1|558577,Poptr1|569348,Poptr1|58312  
8,Poptr1|545069,Poptr1|563692,Poptr1|592893,Poptr1|575018,Poptr1|580810,Poptr1|585874,Poptr1|580390,Poptr1|5  
63691,Poptr1|560898,Poptr1|567670  
AT3G03770.1 Poptr1|571257,Poptr1|738514  
AT2G26730.1 Poptr1|578398  
AT5G62710.1 Poptr1|699455  
AT1G14390.1,AT2G02780.1 Poptr1|739883  
AT2G24230.1 Poptr1|58746,Poptr1|653571  
AT4G18640.1,AT5G45840.1 Poptr1|555666,Poptr1|687563  
AT5G67200.1,AT3G50230.1 Poptr1|76082,Poptr1|558890  
AT5G35390.1,AT2G07040.1 Poptr1|99246,Poptr1|99267,Poptr1|344215  
AT1G66150.1 Poptr1|556000,Poptr1|348736  
AT2G02220.1 Poptr1|566348,Poptr1|564759  
AT3G15410.1 Poptr1|568927  
AT5G10020.1 Poptr1|562687,Poptr1|51745  
AT3G12610.1 Poptr1|691475,Poptr1|557749,Poptr1|554949,Poptr1|62984  
AT4G22730.1 Poptr1|60467,Poptr1|350105  
AT5G45800.1 Poptr1|545169,Poptr1|568699  
AT3G17840.1,AT1G48480.1 Poptr1|345787,Poptr1|700875  
AT5G16000.1 Poptr1|580735,Poptr1|693809  
AT1G35710.1 Poptr1|574557,Poptr1|356401,Poptr1|574486,Poptr1|574506  
AT2G36570.1 Poptr1|589556  
AT1G08590.1 Poptr1|573741,Poptr1|571122,Poptr1|553299  
AT4G23740.1 Poptr1|569464,Poptr1|100153,Poptr1|646712,Poptr1|640395  
AT1G80080.1 Poptr1|597613  
AT5G14210.1 Poptr1|356030  
AT4G39400.1 Poptr1|562744  
AT1G68780.1 Poptr1|564473  
AT5G51350.1 Poptr1|561285  
AT1G73080.1,AT1G17750.1 Poptr1|563462,Poptr1|563474  
AT2G01950.1 Poptr1|657034  
AT1G29750.2 Poptr1|545124  
AT2G28960.1,AT2G28990.1,AT2G14440.1,AT3G46420.1,AT1G51860.1,AT1G49100.1,AT4G29990.1,AT2G19190.1,A  
T1G05700.1,AT2G19230.1,AT3G46350.1,AT1G51910.1,AT3G21340.1,AT4G29180.1,AT5G59680.1,AT4G29450.1,AT  
3G46340.1,AT1G51810.1,AT2G04300.1,AT1G51850.1,AT1G51890.1,AT1G51805.1,AT1G51800.1,AT5G59650.1,AT1  
G07550.1,AT1G51790.1,AT1G51820.1,AT2G14510.1,AT3G46400.1,AT4G20450.1,AT3G46370.1,AT1G51880.1,AT5G  
16900.1,AT2G29000.1,AT2G19210.1,AT5G59670.1,AT3G46330.1,AT1G07560.1  
Poptr1|597528,Poptr1|574398,Poptr1|102728  
AT2G31880.1 Poptr1|570180,Poptr1|575262  
AT5G63710.1 Poptr1|65184,Poptr1|579984  
AT3G28040.1 Poptr1|343048,Poptr1|572898  
AT1G34210.1 Poptr1|574322  
AT5G51560.1 Poptr1|570578,Poptr1|701139  
AT2G01210.1 Poptr1|566571,Poptr1|720688  
AT1G56130.1,AT1G56120.1,AT1G56140.1,AT1G56145.1 Poptr1|350425,Poptr1|691036  
AT1G33600.1,AT5G49770.1,AT3G53590.1,AT1G73070.1,AT2G33050.1,AT2G26380.1,AT5G01950.1,AT3G25020.1,A  
T1G45616.1,AT3G05360.1,AT5G49780.1,AT1G33670.1,AT5G65710.1,AT1G25320.1,AT2G01820.1,AT3G53240.1,AT  
4G37250.1,AT4G13810.1,AT3G05660.1,AT4G28650.1,AT5G67280.1,AT5G16590.1,AT3G05370.1,AT2G15080.1,AT1  
G71400.1,AT2G32660.1,AT2G33020.1,AT5G59660.1,AT3G24900.1,AT3G05650.1,AT2G15300.1,AT3G23110.1,AT1G  
74180.1,AT2G13800.1,AT1G74190.1,AT1G17250.1,AT3G19700.1,AT3G56050.1,AT5G65700.1,AT3G56370.1,AT5G0  
7620.1,AT3G49670.1,AT1G13230.1,AT1G07390.1,AT1G09970.2,AT2G41820.1,AT5G06870.1,AT1G12460.1,AT1G54  
480.1,AT2G13790.1,AT5G44700.1,AT4G08850.1,AT1G74360.1,AT4G36180.1,AT1G31420.1,AT2G45340.1,AT3G1108  
0.1,AT5G41180.1,AT2G27060.1,AT1G33590.1,AT3G13065.1,AT2G33060.1,AT4G13820.1,AT5G46330.1,AT5G41680.  
1,AT1G58190.1,AT5G13290.1,AT3G13380.1,AT1G51870.1,AT1G72300.1,AT3G11010.1,AT3G57830.1,AT1G33610.1,  
AT5G49750.1,AT5G25930.1,AT1G17230.1,AT4G13920.1,AT3G25010.1,AT5G39390.1,AT1G55610.1,AT3G17640.1,A  
T2G35620.1,AT4G18760.1,AT1G75820.1,AT1G74200.1,AT1G74170.1,AT1G17240.1,AT4G31250.1,AT5G37450.1,AT  
1G27190.1,AT1G07650.1,AT5G49760.1,AT4G13880.1,AT5G25910.1,AT4G28490.1,AT5G61240.1,AT1G53420.1,AT1  
G28440.1,AT4G20940.1,AT2G25440.1,AT2G33170.1,AT1G78980.1,AT1G60630.1,AT4G39270.1,AT3G24982.1,AT2G  
42800.1,AT4G03010.1,AT5G58150.1,AT1G06840.1,AT3G28890.1,AT2G25790.1,AT1G69910.1,AT2G24130.1,AT5G6  
3930.1,AT1G75640.1,AT5G01890.1,AT1G03440.1,AT5G40170.1,AT5G48940.1,AT5G56040.2,AT5G61480.1,AT5G23  
400.1,AT3G02880.1,AT5G66330.1,AT1G71390.1,AT4G34220.1,AT1G71830.1,AT2G42290.1,AT1G63430.1,AT5G53  
90.1,AT1G24650.1,AT4G26540.1,AT2G32680.1,AT5G07180.1,AT5G029740.1,AT5G06940.1,AT5G61570.1,AT1G6295  
0.1,AT3G59510.1,AT5G12940.1,AT4G28560.1,AT5G58540.1,AT3G23750.1,AT5G62230.1,AT3G23120.1,AT3G56100.

1,AT3G20820.1,AT4G20140.1,AT1G67510.1,AT1G66830.1,AT5G20690.1,AT1G72180.1,AT5G06860.1,AT2G15320.1,AT5G07280.1,AT5G46080.1,AT3G24660.1,AT1G34110.1,AT4G20270.1,AT1G79620.1,AT1G60800.1,AT3G14840.2,AT1G34420.1,AT4G04220.1,AT2G16250.1,AT5G27060.1,AT1G53440.1,AT3G51740.1,AT3G25670.1,AT4G03390.1,AT1G47890.1,AT2G25470.1,AT3G02130.1,AT1G78530.1,AT2G26330.1,AT3G23010.1,AT1G53430.1,AT2G33080.1  
Poptr1|597728,Poptr1|63094,Poptr1|675740,Poptr1|592380,Poptr1|48940,Poptr1|72048,Poptr1|675221,Poptr1|106403,Poptr1|98705,Poptr1|645752,Poptr1|356343,Poptr1|642936,Poptr1|575638,Poptr1|580405,Poptr1|588592,Poptr1|554339,Poptr1|574226,Poptr1|103963,Poptr1|669725,Poptr1|706949,Poptr1|65707,Poptr1|589583,Poptr1|595324,Poptr1|565051,Poptr1|578835,Poptr1|672125,Poptr1|592381,Poptr1|585065,Poptr1|574290,Poptr1|561141,Poptr1|105876,Poptr1|589791,Poptr1|355401,Poptr1|579470,Poptr1|591443,Poptr1|97607,Poptr1|101374,Poptr1|582916,Poptr1|107890,Poptr1|722248,Poptr1|349114,Poptr1|675206,Poptr1|681701,Poptr1|350441,Poptr1|553322,Poptr1|589133,Poptr1|597362,Poptr1|552941,Poptr1|595323,Poptr1|579055,Poptr1|107172,Poptr1|583546,Poptr1|563240,Poptr1|569644,Poptr1|674216,Poptr1|550404,Poptr1|553342,Poptr1|589131,Poptr1|595462,Poptr1|684096,Poptr1|669997,Poptr1|592666,Poptr1|573398,Poptr1|571925,Poptr1|580598,Poptr1|584872,Poptr1|569626,Poptr1|100736,Poptr1|590312,Poptr1|677015,Poptr1|683886,Poptr1|568874,Poptr1|551280,Poptr1|355410,Poptr1|588247,Poptr1|108760,Poptr1|577282,Poptr1|346563,Poptr1|594167,Poptr1|349320,Poptr1|101552,Poptr1|354211,Poptr1|583646,Poptr1|679185,Poptr1|726057,Poptr1|656498,Poptr1|695134,Poptr1|355398,Poptr1|554167,Poptr1|55462,Poptr1|354798,Poptr1|545161,Poptr1|579086,Poptr1|596674,Poptr1|351657,Poptr1|577079,Poptr1|65955,Poptr1|580953,Poptr1|690927,Poptr1|693331,Poptr1|581679,Poptr1|348879,Poptr1|588747,Poptr1|594625,Poptr1|570161,Poptr1|693316,Poptr1|583807,Poptr1|549938,Poptr1|585782,Poptr1|559344,Poptr1|583235,Poptr1|577372,Poptr1|551668,Poptr1|550406,Poptr1|349333,Poptr1|585509,Poptr1|586593,Poptr1|62680,Poptr1|563258,Poptr1|555046,Poptr1|64521,Poptr1|593365,Poptr1|587693,Poptr1|594274,Poptr1|107719,Poptr1|567799,Poptr1|585947,Poptr1|594406,Poptr1|595208,Poptr1|666513,Poptr1|595820,Poptr1|571773,Poptr1|65685,Poptr1|54454,Poptr1|105880,Poptr1|351213,Poptr1|596213,Poptr1|581965,Poptr1|106113,Poptr1|589787,Poptr1|593364,Poptr1|581692,Poptr1|582582,Poptr1|738987,Poptr1|76233,Poptr1|102524,Poptr1|577061,Poptr1|574291,Poptr1|58495,Poptr1|97839,Poptr1|107758,Poptr1|556469,Poptr1|640080,Poptr1|570988,Poptr1|645750,Poptr1|106021,Poptr1|596829,Poptr1|53289,Poptr1|99559,Poptr1|589615,Poptr1|576316,Poptr1|730860,Poptr1|581530,Poptr1|584755,Poptr1|553444,Poptr1|589794,Poptr1|99550,Poptr1|99823,Poptr1|101721,Poptr1|554813,Poptr1|108996,Poptr1|568184,Poptr1|98736,Poptr1|545253,Poptr1|569449,Poptr1|588241,Poptr1|351212,Poptr1|583623,Poptr1|574483,Poptr1|585948,Poptr1|569688,Poptr1|104813,Poptr1|575635,Poptr1|569665,Poptr1|549858,Poptr1|730629,Poptr1|709382,Poptr1|595210,Poptr1|582910,Poptr1|355434,Poptr1|590620,Poptr1|578711,Poptr1|350038,Poptr1|703816,Poptr1|585813,Poptr1|703772,Poptr1|49433,Poptr1|49302,Poptr1|553840,Poptr1|571667,Poptr1|592224,Poptr1|583809,Poptr1|577081,Poptr1|594268,Poptr1|355344,Poptr1|104703,Poptr1|594276,Poptr1|705336,Poptr1|595616,Poptr1|561968,Poptr1|594706,Poptr1|566442,Poptr1|100976,Poptr1|102507,Poptr1|584892,Poptr1|349311,Poptr1|593125,Poptr1|699408,Poptr1|356263,Poptr1|545254,Poptr1|580023,Poptr1|548097,Poptr1|355381,Poptr1|356922,Poptr1|589134,Poptr1|345344,Poptr1|572778,Poptr1|579119,Poptr1|566083,Poptr1|570981,Poptr1|551345,Poptr1|591496,Poptr1|65153,Poptr1|72643,Poptr1|646384,Poptr1|57987,Poptr1|718257,Poptr1|678937,Poptr1|569607,Poptr1|73064,Poptr1|579376,Poptr1|569141,Poptr1|545098,Poptr1|102175,Poptr1|48628,Poptr1|577206,Poptr1|589020,Poptr1|693310,Poptr1|107484,Poptr1|553312,Poptr1|563523,Poptr1|578847,Poptr1|593991,Poptr1|565886,Poptr1|591627,Poptr1|597185,Poptr1|350443,Poptr1|553527,Poptr1|569159,Poptr1|676250,Poptr1|584871,Poptr1|652015,Poptr1|76383,Poptr1|596082,Poptr1|346567,Poptr1|98699,Poptr1|560512,Poptr1|581697,Poptr1|576953,Poptr1|591120,Poptr1|582834,Poptr1|586944,Poptr1|591497,Poptr1|579445,Poptr1|96846,Poptr1|665652,Poptr1|585616,Poptr1|590165,Poptr1|667401,Poptr1|697444,Poptr1|596299,Poptr1|579779,Poptr1|593201,Poptr1|546479,Poptr1|577182,Poptr1|589786,Poptr1|96935,Poptr1|717994,Poptr1|641782,Poptr1|568873,Poptr1|103804,Poptr1|577070,Poptr1|560952,Poptr1|591447,Poptr1|355412,Poptr1|592894,Poptr1|568691,Poptr1|681401,Poptr1|569657,Poptr1|59854,Poptr1|563687,Poptr1|587203,Poptr1|586592,Poptr1|557428,Poptr1|579146,Poptr1|352747,Poptr1|566410,Poptr1|702513,Poptr1|578044,Poptr1|346735,Poptr1|594358,Poptr1|743857,Poptr1|699008,Poptr1|351355,Poptr1|676352,Poptr1|554268,Poptr1|701405,Poptr1|584896,Poptr1|580021,Poptr1|559728,Poptr1|717958,Poptr1|594530,Poptr1|596561,Poptr1|579050,Poptr1|586595,Poptr1|561906,Poptr1|596826,Poptr1|344342,Poptr1|58872,Poptr1|663637,Poptr1|104516,Poptr1|587892,Poptr1|584072,Poptr1|72989,Poptr1|101911,Poptr1|99857,Poptr1|572870,Poptr1|569646,Poptr1|109307,Poptr1|101875,Poptr1|564304,Poptr1|596650,Poptr1|350339,Poptr1|103718,Poptr1|63264,Poptr1|548558  
AT5G48380.1 Poptr1|567154,Poptr1|553136,Poptr1|564128,Poptr1|567153  
AT5G21090.1,AT3G43740.2 Poptr1|682526,Poptr1|549013  
AT1G67720.1 Poptr1|354714,Poptr1|565946  
AT2G37050.3 Poptr1|576643,Poptr1|702705  
AT2G23950.1,AT4G30520.1 Poptr1|578689,Poptr1|352389  
AT3G28450.1 Poptr1|549493,Poptr1|577539  
AT3G42880.1 Poptr1|589309  
AT5G06820.1 Poptr1|352270  
AT3G14350.1,AT1G53730.1 Poptr1|589828  
AT5G65830.1,AT3G49750.1 Poptr1|572001,Poptr1|53456  
AT5G45780.1 Poptr1|545163  
AT1G50610.1,AT3G20190.1 Poptr1|563384,Poptr1|97982  
AT3G25560.2 Poptr1|698274,Poptr1|564436  
AT5G65240.1,AT5G10290.1 Poptr1|718757,Poptr1|51713  
AT5G07150.1  
AT1G34290.1  
AT5G24100.1  
AT5G53320.1  
AT1G64210.1  
AT1G29730.1  
AT5G59616.1,AT2G28970.1  
AT4G33430.1  
AT1G69270.1,AT5G58300.1,AT2G20850.1,AT3G08680.1,AT3G24240.1  
AT3G12145.1  
AT5G49290.1  
AT2G33030.1,AT2G23300.1,AT5G63410.1,AT1G11130.1  
AT2G34930.1  
Poptr1|576103,Poptr1|582694  
Poptr1|555646,Poptr1|595565  
Poptr1|569158,Poptr1|104849  
Poptr1|592640,Poptr1|107056  
Poptr1|584893,Poptr1|351352,Poptr1|586732,Poptr1|587645,Poptr1|586145  
Poptr1|585926

Poptr1|575040  
Poptr1|588661  
Poptr1|576099  
Poptr1|595328  
Poptr1|104398  
Poptr1|108039  
Poptr1|560897  
Poptr1|575131,Poptr1|570066  
Poptr1|555588,Poptr1|99885  
Poptr1|576510  
Poptr1|680128  
Poptr1|595614  
Poptr1|546512  
Poptr1|586894,Poptr1|587646,Poptr1|596001  
Poptr1|593337  
Poptr1|595620  
Poptr1|675207  
Poptr1|545354  
Poptr1|596156  
Poptr1|108187  
Poptr1|568653  
Poptr1|596360,Poptr1|591266  
Poptr1|595804,Poptr1|592090,Poptr1|596361,Poptr1|101781,Poptr1|597527  
Poptr1|64099  
Poptr1|558609,Poptr1|562691  
Poptr1|554725  
Poptr1|75825  
Poptr1|702019  
Poptr1|674237  
Poptr1|596673,Poptr1|581695,Poptr1|561359,Poptr1|584360,Poptr1|104413,Poptr1|582601,Poptr1|10072  
3,Poptr1|553526,Poptr1|588338,Poptr1|594705,Poptr1|354391,Poptr1|593075,Poptr1|588620,Poptr1|594086,Poptr1|1  
01375,Poptr1|594711,Poptr1|587122,Poptr1|588091,Poptr1|591051,Poptr1|586853,Poptr1|702350,Poptr1|569661,Pop  
ptr1|592793,Poptr1|579103,Poptr1|101376,Poptr1|588831,Poptr1|581693,Poptr1|587895,Poptr1|578846,Poptr1|5819  
73,Poptr1|591524,Poptr1|677016,Poptr1|705424,Poptr1|582909,Poptr1|582665,Poptr1|590142,Poptr1|554901,Poptr1|  
102606,Poptr1|583622,Poptr1|576290,Poptr1|582571  
Poptr1|102504,Poptr1|582450,Poptr1|106885,Poptr1|103198,Poptr1|106112,Poptr1|553314  
Poptr1|103619,Poptr1|581532,Poptr1|553508,Poptr1|581385,Poptr1|590618,Poptr1|107505,Poptr1|56876  
3,Poptr1|553251,Poptr1|575709,Poptr1|675671  
Poptr1|705465,Poptr1|677311,Poptr1|591041  
Poptr1|587685,Poptr1|588711  
Poptr1|571139  
Poptr1|75387,Poptr1|354663,Poptr1|66010,Poptr1|724066,Poptr1|569957,Poptr1|587190,Poptr1|105625,  
Poptr1|594243  
Poptr1|590504,Poptr1|355411,Poptr1|570438,Poptr1|583000,Poptr1|596822,Poptr1|556027,Poptr1|57445  
9,Poptr1|106715,Poptr1|570437,Poptr1|585942,Poptr1|98481,Poptr1|660407,Poptr1|585508,Poptr1|587669,Poptr1|59  
7499,Poptr1|703288,Poptr1|102506,Poptr1|587677,Poptr1|107566,Poptr1|581966,Poptr1|585507,Poptr1|581652,Pop  
tr1|581975,Poptr1|346564,Poptr1|597758,Poptr1|55055,Poptr1|570858,Poptr1|588752,Poptr1|556309,Poptr1|581699,  
Poptr1|588828,Poptr1|586355,Poptr1|744758,Poptr1|578836  
Poptr1|108053,Poptr1|577256,Poptr1|588977,Poptr1|736662,Poptr1|581694,Poptr1|582893,Poptr1|58883  
2,Poptr1|588406,Poptr1|577076,Poptr1|668667  
Poptr1|586167,Poptr1|591187,Poptr1|580661,Poptr1|580557,Poptr1|587595,Poptr1|569686  
Poptr1|106704  
Poptr1|583426  
Poptr1|592956  
Poptr1|577196  
Poptr1|571929  
Poptr1|640081  
Poptr1|573582,Poptr1|594314  
Poptr1|590457  
Poptr1|587793  
Poptr1|109302  
Poptr1|593275  
Poptr1|595921  
Poptr1|672063,Poptr1|580365,Poptr1|349396,Poptr1|673537  
Poptr1|556851  
Poptr1|585006  
Poptr1|646974  
Poptr1|593180,Poptr1|590668  
Poptr1|588660  
Poptr1|351474  
Poptr1|593276  
Poptr1|575930  
Poptr1|588986,Poptr1|588978  
Poptr1|576724  
Poptr1|589380  
Poptr1|556468  
Poptr1|579136  
Poptr1|581964  
Poptr1|555184  
Poptr1|585064,Poptr1|585074,Poptr1|101910,Poptr1|585067,Poptr1|99554,Poptr1|109036,Poptr1|585070,  
Poptr1|103349,Poptr1|585066  
Poptr1|75269

Poptr1|585086  
Poptr1|554726  
Poptr1|649663,Poptr1|681866  
Poptr1|585077  
Poptr1|584129,Poptr1|349421  
Poptr1|712367  
AT2G01918.1 Poptr1|552953  
AT4G21280.2,AT4G05180.1 Poptr1|568388,Poptr1|555462  
AT5G43980.1 Poptr1|564993,Poptr1|343212,Poptr1|565821  
AT1G04520.1,AT2G33330.1  
AT2G44410.1 Poptr1|672684,Poptr1|558151,Poptr1|352237,Poptr1|576379  
AT3G58030.1,AT2G42030.1  
AT5G55600.1 Poptr1|550192  
AT1G68580.2 Poptr1|686332,Poptr1|566639  
Poptr1|351244  
Poptr1|566638  
AT1G18260.1 Poptr1|575012,Poptr1|569730  
AT1G73570.1  
AT1G30890.1,AT3G59500.1 Poptr1|594531,Poptr1|685924  
Poptr1|573187  
Poptr1|352349  
Poptr1|578734  
Poptr1|679588,Poptr1|591647  
AT4G39520.1 Poptr1|718913  
AT1G72660.1,AT1G17470.1 Poptr1|691187,Poptr1|682098  
AT2G42280.1 Poptr1|60892  
Poptr1|549344,Poptr1|557744  
AT5G25830.1 Poptr1|102667,Poptr1|578047,Poptr1|561742  
AT3G24050.1 Poptr1|693231,Poptr1|690928  
AT3G54810.1 Poptr1|659889,Poptr1|344900  
AT3G60530.1,AT2G45050.1 Poptr1|684368,Poptr1|677594  
AT5G66320.1 Poptr1|719658,Poptr1|593881  
AT2G28340.1,AT1G08000.1,AT1G08010.1 Poptr1|595069  
AT3G20750.1 Poptr1|351064  
AT4G26150.1,AT5G56860.1 Poptr1|653902,Poptr1|577946  
AT4G32890.1  
AT3G51080.1  
AT4G36240.1  
AT3G45170.1  
Poptr1|713121,Poptr1|649333  
Poptr1|571221  
AT5G54310.1 Poptr1|582098,Poptr1|726955  
Poptr1|660429  
Poptr1|727702  
Poptr1|661406  
Poptr1|647714  
AT4G30380.1 Poptr1|344517  
AT2G18660.1 Poptr1|669494,Poptr1|695200  
Poptr1|555219  
AT4G04020.1,AT4G22240.1 Poptr1|584733  
AT2G35490.1 Poptr1|702944,Poptr1|693570  
Poptr1|677234  
Poptr1|568147  
AT3G60580.1,AT2G45120.1 Poptr1|342678  
AT1G02030.1  
Poptr1|589863,Poptr1|349735  
Poptr1|590167  
AT3G26680.1 Poptr1|572818  
AT2G45700.1 Poptr1|561558  
ATCG01310.1,ATCG00830.1 Poptr1|747155  
Poptr1|104447  
Poptr1|586041  
Poptr1|548197  
Poptr1|107772  
Poptr1|546563  
AT5G49960.1 Poptr1|596732,Poptr1|98691  
Poptr1|574425,Poptr1|582739,Poptr1|574421,Poptr1|596731  
AT5G38740.1,AT5G65330.1,AT5G41200.1,AT5G40120.1,AT5G37415.1,AT4G02235.1,AT5G39750.1,AT5G39810.1,AT4G11250.1,AT5G40220.1,AT3G18650.1,AT5G40070.1 Poptr1|596719,Poptr1|575173  
AT1G07990.1 Poptr1|741930  
AT3G45190.1  
AT3G48010.1 Poptr1|585267  
AT5G53130.1 Poptr1|57487,Poptr1|569505  
AT5G14870.1 Poptr1|592282  
AT5G54250.1 Poptr1|582088  
AT1G19780.1,AT1G15990.1 Poptr1|554889,Poptr1|100430,Poptr1|689158  
AT4G30360.1 Poptr1|578366,Poptr1|578656  
AT3G17700.1,AT3G17690.1 Poptr1|569408,Poptr1|97013,Poptr1|743590  
AT5G15410.1 Poptr1|701855  
AT2G28260.1 Poptr1|558271  
AT2G46430.1,AT4G01010.1,AT1G01340.1 Poptr1|552266,Poptr1|731332  
AT2G46450.1



AT2G23980.1,AT4G30560.1  
AT5G57940.1  
AT2G24610.1  
AT2G46440.1  
Poptr1|352428,Poptr1|591003  
Poptr1|589443  
Poptr1|353081  
Poptr1|579714,Poptr1|97011  
Poptr1|577709  
Poptr1|595076  
Poptr1|595077  
AT5G46860.1 Poptr1|712176,Poptr1|590045  
AT5G16830.1  
AT1G32270.1  
AT4G17730.1  
Poptr1|572876  
AT4G24140.1 Poptr1|350420,Poptr1|683631  
AT5G17780.1,AT5G17720.1  
AT5G41900.1,AT1G64670.1  
AT5G53200.1 Poptr1|569482  
AT1G01380.1  
AT2G30420.1,AT2G30432.1  
Poptr1|591383  
Poptr1|552257  
AT5G53080.1 Poptr1|574726  
AT1G80570.2 Poptr1|668368  
Poptr1|65108  
AT4G04470.1 Poptr1|568052,Poptr1|584688  
AT4G14305.1 Poptr1|725881  
Poptr1|675544  
Poptr1|594260  
Poptr1|675543  
AT1G36160.1 Poptr1|559146,Poptr1|684485  
AT1G36180.1  
AT3G10160.1 Poptr1|576221,Poptr1|560447  
AT5G05980.1 Poptr1|563946,Poptr1|567359  
AT3G55630.3  
Poptr1|595739  
AT3G46740.1 Poptr1|683615  
AT1G35880.1  
AT1G35860.1  
AT4G09080.1  
Poptr1|712674  
AT4G18020.1 Poptr1|689472  
AT1G67710.1 Poptr1|565094  
AT4G31920.1,AT2G25180.1 Poptr1|578782,Poptr1|702054,Poptr1|344757  
AT3G16857.2,AT4G16110.1 Poptr1|725513,Poptr1|742303  
AT2G27070.1,AT5G07210.1 Poptr1|575747,Poptr1|570522  
AT5G44190.1,AT2G20570.1 Poptr1|654401,Poptr1|588137  
AT3G10760.1 Poptr1|560350,Poptr1|61981  
AT1G68210.1  
AT5G58080.1  
AT3G62670.1  
AT5G62120.1  
AT5G05090.1  
AT2G40970.1  
Poptr1|658208  
Poptr1|561296  
Poptr1|347912  
Poptr1|566558,Poptr1|564674  
Poptr1|572656  
Poptr1|742302  
Poptr1|741543  
AT3G53830.1 Poptr1|576833  
AT3G55580.1  
Poptr1|560808  
AT1G10500.1 Poptr1|654895,Poptr1|650825  
AT5G03905.1 Poptr1|652963  
AT1G53210.1 Poptr1|684057  
AT2G34020.1,AT2G34030.1,AT1G29020.1  
Poptr1|65573,Poptr1|103245  
Poptr1|545221  
AT2G44290.1,AT2G44300.1 Poptr1|745430  
Poptr1|561219  
Poptr1|547637,Poptr1|678768,Poptr1|647488  
AT3G55850.2 Poptr1|555050  
Poptr1|588337  
AT2G19550.1,AT3G47590.1,AT1G29840.1,AT3G47560.2 Poptr1|582957,Poptr1|729756  
AT5G11910.1  
AT4G18440.1,AT1G36280.1 Poptr1|567317  
Poptr1|583576  
Poptr1|563974

Poptr1|563975  
AT3G60880.2,AT2G45440.1 Poptr1|730895,Poptr1|684354  
Poptr1|590446  
AT1G77300.1 Poptr1|551417,Poptr1|559281  
AT1G76710.1 Poptr1|72623  
Poptr1|551418  
AT1G54860.1 Poptr1|595589,Poptr1|570853  
AT5G19250.1,AT3G06035.1 Poptr1|720267,Poptr1|720254  
AT5G19230.1,AT5G19240.1  
Poptr1|570852,Poptr1|595590,Poptr1|595591  
AT3G17880.1 Poptr1|699533,Poptr1|57548  
AT2G35010.1,AT1G31020.1 Poptr1|589850  
AT3G08710.1 Poptr1|695349,Poptr1|701694  
AT1G69880.1,AT1G59730.1 Poptr1|701805,Poptr1|565241  
AT3G51030.1 Poptr1|563225  
AT3G02730.1,AT5G16400.1 Poptr1|683140  
AT3G53220.1 Poptr1|676071  
AT1G11530.1 Poptr1|647677,Poptr1|730316  
AT4G22670.1 Poptr1|646478,Poptr1|60475  
AT5G39950.1  
Poptr1|581081  
Poptr1|710146,Poptr1|651991  
Poptr1|559783  
Poptr1|727798  
AT3G58120.1,AT2G42380.2 Poptr1|689310,Poptr1|582775  
Poptr1|49419  
AT1G24090.1,AT5G51080.1 Poptr1|714469,Poptr1|726687,Poptr1|564778  
AT3G01410.1  
Poptr1|564779  
AT2G33470.1 Poptr1|565782,Poptr1|720197  
AT3G21260.2 Poptr1|559343,Poptr1|347151  
AT1G21360.1  
Poptr1|684616  
Poptr1|573949  
AT1G48350.1 Poptr1|581561,Poptr1|725595  
AT1G14205.1 Poptr1|564209  
AT5G67030.1 Poptr1|696029,Poptr1|72002  
AT1G60970.1 Poptr1|683246  
AT4G08520.1,AT3G09800.1  
Poptr1|746755  
AT1G54385.1 Poptr1|573915,Poptr1|573910,Poptr1|571213  
AT3G03970.1  
Poptr1|574903  
AT5G55070.1,AT4G26910.1 Poptr1|642210,Poptr1|727967  
Poptr1|700565  
Poptr1|677152  
AT1G64890.1 Poptr1|56771,Poptr1|702468  
AT2G33280.1,AT1G04570.1 Poptr1|354638  
AT1G79710.1 Poptr1|62790,Poptr1|578302  
AT5G10820.1 Poptr1|344774  
AT5G25040.1,AT5G25050.1  
AT1G78280.1 Poptr1|643793  
Poptr1|643794  
Poptr1|643792  
AT5G63420.1 Poptr1|346007  
Poptr1|733581  
Poptr1|666639  
Poptr1|666637  
AT1G04640.1 Poptr1|639731  
AT4G31050.1 Poptr1|644174  
AT1G47580.1  
Poptr1|555282  
AT5G25580.1 Poptr1|352835,Poptr1|578128  
AT1G18950.1 Poptr1|733175  
Poptr1|661912  
Poptr1|661911  
Poptr1|355807  
AT4G31210.1 Poptr1|103788,Poptr1|108987  
Poptr1|745361  
Poptr1|586379  
Poptr1|586363  
AT5G54110.1 Poptr1|568977,Poptr1|582081  
AT4G21450.1 Poptr1|555486,Poptr1|568309  
AT4G05060.1  
Poptr1|571802  
AT4G18650.1 Poptr1|555665  
AT3G14880.1 Poptr1|99830  
AT4G18680.1,AT4G18690.1,AT5G45830.1  
AT4G18660.1  
Poptr1|654715  
AT4G39970.1 Poptr1|718749  
AT3G48420.1 Poptr1|700980

Poptr1|571958  
AT3G25800.1,AT1G13320.1 Poptr1|687194,Poptr1|696575  
AT1G25490.1  
Poptr1|100329  
AT3G09980.1 Poptr1|589571  
AT2G27740.1 Poptr1|741625,Poptr1|649104  
AT2G36410.1,AT3G52920.1  
AT5G03660.1  
AT3G46540.1 Poptr1|650271,Poptr1|683825  
Poptr1|353550  
AT5G53530.1,AT4G27690.1 Poptr1|717432,Poptr1|746044  
Poptr1|583395  
Poptr1|650366  
AT3G19895.1 Poptr1|567069,Poptr1|353834  
AT5G05230.1 Poptr1|574118  
AT2G40640.1  
Poptr1|738712  
AT2G18950.1 Poptr1|578578  
Poptr1|352986,Poptr1|352987  
Poptr1|580507  
AT1G02080.1 Poptr1|684367  
Poptr1|677591  
Poptr1|644300,Poptr1|677589  
Poptr1|590175  
AT4G09340.1,AT1G35470.2 Poptr1|574251,Poptr1|740713  
AT4G09200.1,AT4G09310.1,AT4G09250.1  
AT3G51140.1 Poptr1|563251  
AT5G23040.1 Poptr1|355580  
Poptr1|674365  
AT1G16880.1 Poptr1|660080  
AT5G04740.1 Poptr1|563581,Poptr1|725437  
Poptr1|679460  
Poptr1|563484  
Poptr1|563483  
AT2G03270.1 Poptr1|695521  
AT4G30100.1,AT2G19120.1 Poptr1|342467,Poptr1|716529  
AT1G65810.1,AT1G65780.1 Poptr1|102214,Poptr1|556073,Poptr1|593282  
AT5G47010.1 Poptr1|356566,Poptr1|743214  
AT1G16800.1  
AT5G37150.1,AT5G52090.1,AT5G37160.1  
Poptr1|576330  
Poptr1|592828,Poptr1|592831,Poptr1|592826,Poptr1|556072,Poptr1|545570  
Poptr1|592829  
Poptr1|592827,Poptr1|593281  
Poptr1|104055  
AT3G53540.1 Poptr1|576601,Poptr1|352528  
AT4G28760.1 Poptr1|349070,Poptr1|573393  
AT2G20240.1  
AT5G43880.1  
AT5G37320.1,AT5G43240.1,AT3G09140.1,AT3G09110.1,AT5G01150.1,AT5G01130.1,AT5G01120.1  
Poptr1|691369  
AT3G09120.1,AT5G01140.1  
Poptr1|549107  
AT4G24380.1 Poptr1|711115  
AT5G65400.1  
Poptr1|351321  
Poptr1|583907  
AT5G19320.1 Poptr1|566279  
AT3G63130.1 Poptr1|72758,Poptr1|684576  
AT3G06000.1  
AT3G55270.1 Poptr1|344948,Poptr1|724801  
AT1G78780.2 Poptr1|568796,Poptr1|746446  
Poptr1|746444,Poptr1|559340,Poptr1|585766,Poptr1|559341  
Poptr1|680472,Poptr1|746445  
AT5G63570.1,AT3G48730.1 Poptr1|575404  
Poptr1|570311  
AT1G63770.2 Poptr1|683680  
Poptr1|705308,Poptr1|102747,Poptr1|554388  
Poptr1|102746  
Poptr1|583595  
AT1G08130.1,AT1G49250.1 Poptr1|697754  
Poptr1|558316  
AT2G46820.1 Poptr1|644663,Poptr1|572472  
AT1G52220.1 Poptr1|645961,Poptr1|705739  
AT3G53650.1,AT2G37470.1 Poptr1|698696,Poptr1|725127,Poptr1|725141  
AT2G28720.1,AT5G59910.1 Poptr1|597304,Poptr1|723333,Poptr1|555931,Poptr1|553020  
AT1G08170.1 Poptr1|548736  
AT3G09480.1  
AT3G45980.1,AT1G07790.1,AT3G46030.1  
AT5G22880.1  
AT5G02570.1  
AT2G22690.1,AT4G37880.1 Poptr1|697415,Poptr1|575673,Poptr1|550071,Poptr1|570590

AT5G09630.1  
 AT4G19650.1 Poptr1|586736  
 AT5G06810.1 Poptr1|576279,Poptr1|592399  
 AT3G60400.1 Poptr1|591800  
 AT5G45113.1  
     Poptr1|105352  
     Poptr1|104954  
     Poptr1|575564  
     Poptr1|576280  
 AT2G46210.1,AT3G61580.1 Poptr1|572325,Poptr1|644538  
     Poptr1|561655  
 AT2G37940.1,AT3G54020.1 Poptr1|560850,Poptr1|735665  
 AT2G29525.1  
 AT1G10410.1,AT1G59650.1 Poptr1|726335  
 AT5G39430.1,AT3G29180.1 Poptr1|577689  
 AT1G13970.1  
     Poptr1|58350  
     Poptr1|657533  
     Poptr1|55385  
 AT1G03280.1 Poptr1|705014,Poptr1|55184  
 AT4G20340.1,AT4G20810.1  
     Poptr1|584179,Poptr1|657024  
     Poptr1|574826  
 AT3G51450.1,AT3G51440.1,AT3G51420.1,AT3G51430.1 Poptr1|716127  
     Poptr1|596617,Poptr1|558760  
     Poptr1|589302  
 AT5G40850.1 Poptr1|583248  
     Poptr1|579328  
 AT5G06290.1,AT3G11630.1 Poptr1|576525,Poptr1|561430  
     Poptr1|581841  
 AT3G05940.1,AT5G26740.1 Poptr1|704332,Poptr1|704333  
     Poptr1|581581,Poptr1|97534  
     Poptr1|581577  
 AT2G20830.2 Poptr1|571782  
     Poptr1|60274  
     Poptr1|583535  
 AT4G25700.1,AT5G52570.1 Poptr1|703319,Poptr1|693831  
     Poptr1|748052  
     Poptr1|709291  
 AT3G48780.1,AT5G23670.1 Poptr1|662206,Poptr1|733740  
 AT3G48790.1  
 AT3G55760.1 Poptr1|564900  
 AT1G42430.1 Poptr1|694897,Poptr1|710964  
 AT1G63930.1 Poptr1|554411,Poptr1|63499  
 AT1G18740.1,AT1G74450.1,AT1G43630.1 Poptr1|710776,Poptr1|714739  
 AT4G11300.1,AT4G23530.1  
 AT1G54200.1,AT3G13980.1 Poptr1|640618,Poptr1|693740,Poptr1|352622,Poptr1|577985  
 AT5G12050.1  
     Poptr1|561019,Poptr1|577791  
 AT2G04865.1 Poptr1|348535  
 AT1G64260.1,AT1G49920.1,AT1G64255.1  
     Poptr1|60556,Poptr1|586810,Poptr1|574084,Poptr1|596935,Poptr1|662944  
     Poptr1|597628  
     Poptr1|99006  
 AT4G15830.1 Poptr1|747393,Poptr1|565599,Poptr1|587310,Poptr1|587318  
 AT3G01450.1,AT3G18530.1,AT5G14790.1  
     Poptr1|587317  
 AT5G62300.1,AT3G47370.1,AT3G45030.1 Poptr1|701132,Poptr1|570581  
     Poptr1|644326  
     Poptr1|562179  
 AT2G47420.1 Poptr1|572620  
     Poptr1|572624,Poptr1|597215  
 AT3G10920.1 Poptr1|571649,Poptr1|574107  
 AT3G56350.1  
 AT1G15930.1,AT2G32060.1 Poptr1|107708,Poptr1|63035,Poptr1|551211,Poptr1|682166,Poptr1|712601  
 AT1G14980.1 Poptr1|697466,Poptr1|641433  
 AT1G23100.1  
 AT5G20720.1 Poptr1|739209,Poptr1|736747  
 AT2G30790.1,AT1G06680.1 Poptr1|551203,Poptr1|694679  
 AT3G06660.1 Poptr1|348354,Poptr1|564395,Poptr1|570710,Poptr1|572604  
 AT2G47350.1  
 AT1G56460.1  
 AT4G12650.1 Poptr1|342988,Poptr1|732530  
 AT2G01970.1,AT1G14670.1 Poptr1|648231,Poptr1|689669,Poptr1|703310  
 AT3G13772.1,AT1G55130.1 Poptr1|592757  
 AT1G10950.1 Poptr1|584468  
 AT5G25100.1,AT5G10840.1 Poptr1|578289,Poptr1|561994  
 AT5G35160.1 Poptr1|717701  
 AT5G37310.1  
     Poptr1|575084  
     Poptr1|581367  
     Poptr1|588958

Poptr1|569372  
Poptr1|594980  
Poptr1|748132  
Poptr1|569398  
Poptr1|354349  
Poptr1|685082  
Poptr1|578742,Poptr1|352343  
Poptr1|578804  
Poptr1|669661  
AT4G25950.1 Poptr1|574437,Poptr1|592281,Poptr1|655912,Poptr1|58999  
AT3G01390.1 Poptr1|659874  
AT4G23710.1  
AT5G32440.1 Poptr1|58786,Poptr1|560577  
AT1G80040.1  
AT5G02510.1  
Poptr1|593918  
AT1G28510.1 Poptr1|586062  
Poptr1|60746  
AT1G78660.1,AT1G78680.1 Poptr1|585500,Poptr1|747710  
AT1G78670.1  
Poptr1|568783  
Poptr1|568782  
AT2G21340.1 Poptr1|721896,Poptr1|697242  
AT4G39030.1  
Poptr1|557184  
AT1G66530.1,AT4G26300.1 Poptr1|684266  
AT3G25770.1,AT3G25780.1,AT1G13280.1,AT3G25760.1 Poptr1|556141,Poptr1|686337  
Poptr1|580775  
AT5G48370.1 Poptr1|553137  
AT2G30720.1 Poptr1|688889  
Poptr1|675790  
AT3G22230.1,AT4G15000.1 Poptr1|688655,Poptr1|560241,Poptr1|691590  
AT2G32220.1  
AT4G34020.1,AT3G14990.1,AT1G53280.1 Poptr1|697327,Poptr1|568826  
Poptr1|680829  
AT3G02720.1 Poptr1|714275,Poptr1|592872,Poptr1|714282  
AT3G54600.1,AT2G38860.2  
Poptr1|592138,Poptr1|670673  
Poptr1|678279  
AT5G55850.1 Poptr1|550220,Poptr1|660672  
AT5G63270.1,AT3G48450.1 Poptr1|733507,Poptr1|570200  
AT2G17660.1  
Poptr1|732478  
Poptr1|64873  
AT5G14060.1,AT3G02020.1 Poptr1|572881,Poptr1|348906  
AT5G13280.1  
Poptr1|678626  
AT5G66960.1 Poptr1|696055  
AT1G50380.1 Poptr1|718074  
Poptr1|590402  
AT5G61170.1,AT5G15520.1,AT3G02080.1 Poptr1|648537,Poptr1|668653  
Poptr1|596443  
AT1G61580.1 Poptr1|583524,Poptr1|694634,Poptr1|551306  
AT1G43170.1  
Poptr1|680820  
AT4G15093.1 Poptr1|573569,Poptr1|556295,Poptr1|694109,Poptr1|590946  
Poptr1|573588  
Poptr1|595163,Poptr1|573577  
Poptr1|580061  
AT1G74470.1 Poptr1|569972  
Poptr1|594916,Poptr1|592522,Poptr1|649005  
Poptr1|97427  
AT3G02920.1 Poptr1|578589,Poptr1|743384  
AT2G24490.1 Poptr1|745313  
Poptr1|583753,Poptr1|654298,Poptr1|583754  
AT4G37870.1 Poptr1|719761,Poptr1|684454  
AT5G65690.1  
AT3G16700.1,AT4G15940.1 Poptr1|686969  
Poptr1|103588  
AT2G30390.1 Poptr1|582168,Poptr1|702363  
AT5G26030.1  
AT5G35680.1,AT2G04520.1 Poptr1|552718,Poptr1|732379  
Poptr1|572344  
Poptr1|550977  
AT1G29250.1,AT2G34160.1 Poptr1|669037,Poptr1|654129  
AT2G15695.1 Poptr1|704315,Poptr1|649540  
AT5G44250.1 Poptr1|342611,Poptr1|591924  
Poptr1|589075,Poptr1|594558,Poptr1|586611,Poptr1|582516  
Poptr1|579221  
Poptr1|107498  
AT4G27090.1,AT2G20450.1 Poptr1|709905,Poptr1|697874,Poptr1|564957,Poptr1|715219  
AT5G08380.1 Poptr1|567747

AT5G08370.1 Poptr1|61025,Poptr1|566552  
AT3G56310.1 Poptr1|738687  
Poptr1|545039  
AT2G15900.1 Poptr1|581462  
AT1G15240.1 Poptr1|64001  
Poptr1|64002  
Poptr1|722154  
Poptr1|343352  
AT3G59780.1 Poptr1|580415,Poptr1|690288  
Poptr1|573272,Poptr1|574415  
Poptr1|574435,Poptr1|592426,Poptr1|670589  
Poptr1|96851  
AT4G39870.1 Poptr1|558538,Poptr1|685985  
AT2G05590.2 Poptr1|658066  
AT3G20050.1 Poptr1|692452,Poptr1|689533  
AT5G20890.1 Poptr1|589426,Poptr1|706842  
AT3G11830.1 Poptr1|703530,Poptr1|686603  
AT3G03960.1 Poptr1|573918,Poptr1|729996  
AT5G26360.1 Poptr1|714540,Poptr1|573556  
AT3G02530.1,AT5G16070.1 Poptr1|690094  
AT3G18190.1 Poptr1|574956,Poptr1|661718  
AT1G24510.1 Poptr1|565108,Poptr1|726172  
AT4G08640.1  
AT1G67760.1  
Poptr1|675198,Poptr1|721399,Poptr1|586240  
AT4G01575.1 Poptr1|731494,Poptr1|552385  
AT3G61980.1  
Poptr1|574624  
Poptr1|572490  
AT3G10960.1 Poptr1|596945  
AT5G50300.1 Poptr1|575295  
Poptr1|577151  
Poptr1|586312  
Poptr1|570205  
AT5G04490.1 Poptr1|698710  
AT5G60410.2 Poptr1|723519,Poptr1|703590  
Poptr1|567575,Poptr1|563767  
AT5G63030.1 Poptr1|570110,Poptr1|682958  
AT5G18600.1,AT4G15680.1,AT4G15690.1 Poptr1|657995  
AT5G40370.1 Poptr1|706742  
AT5G14070.1,AT3G02000.1 Poptr1|554735,Poptr1|63170,Poptr1|641846  
AT2G47870.1,AT3G62950.1 Poptr1|665154,Poptr1|664494  
AT4G33040.1 Poptr1|561643  
AT1G28480.1 Poptr1|555743,Poptr1|654414,Poptr1|586055,Poptr1|741532  
AT2G47880.1,AT1G06830.1,AT2G30540.1,AT3G62960.1 Poptr1|573501,Poptr1|572742  
AT4G28730.1,AT2G20270.1 Poptr1|349076  
AT1G03020.1,AT3G62930.1 Poptr1|731915,Poptr1|573478  
AT4G15670.1,AT4G15700.1,AT4G15660.1  
AT5G11930.1  
AT1G03850.1  
Poptr1|577834  
Poptr1|664489,Poptr1|573477,Poptr1|57426,Poptr1|664491  
AT5G15940.1,AT5G04070.1 Poptr1|65813  
AT4G11410.1 Poptr1|646635  
AT5G02540.1 Poptr1|685753  
AT4G24050.1 Poptr1|554532,Poptr1|691057  
AT4G09750.1 Poptr1|694644  
AT4G23420.1,AT4G23430.2  
AT2G37540.1  
AT1G64590.1  
Poptr1|593549,Poptr1|48733,Poptr1|593446,Poptr1|350242  
Poptr1|584169,Poptr1|108861  
AT3G11690.1,AT5G06380.1 Poptr1|653413,Poptr1|576460  
AT2G27180.1  
AT1G04830.1,AT4G13730.1 Poptr1|641918,Poptr1|742744  
Poptr1|560606,Poptr1|702313  
AT1G69770.1 Poptr1|62737  
AT1G80740.1  
AT4G19020.1  
Poptr1|555247  
Poptr1|555246  
AT1G64300.1,AT5G41730.1 Poptr1|554461  
Poptr1|57075  
AT2G38130.1 Poptr1|569137,Poptr1|642436  
Poptr1|65656  
Poptr1|585116,Poptr1|587739  
Poptr1|675337,Poptr1|681513  
AT1G72810.1,AT4G29840.2 Poptr1|592721,Poptr1|703921  
AT2G41460.1 Poptr1|734845  
Poptr1|351466  
Poptr1|667345  
AT5G41790.1 Poptr1|640386,Poptr1|554465

AT5G41780.1,AT1G64320.1,AT1G64330.1 Poptr1|63451,Poptr1|554464  
AT5G04270.1 Poptr1|55608  
AT3G18620.1 Poptr1|562831  
AT5G50020.1 Poptr1|551299,Poptr1|559406  
AT5G05070.1 Poptr1|560302,Poptr1|576066  
AT3G26935.1 Poptr1|60138,Poptr1|707083  
AT3G09320.1 Poptr1|576812,Poptr1|344257  
AT4G24630.1  
AT3G56920.1,AT2G40990.1  
AT5G41060.1  
Poptr1|563708  
Poptr1|75878  
Poptr1|48609,Poptr1|554666  
Poptr1|356104,Poptr1|733718  
AT5G41140.1,AT1G63300.1 Poptr1|646586,Poptr1|63566  
AT5G52280.1 Poptr1|356236,Poptr1|667027  
Poptr1|575817  
Poptr1|595964  
AT5G08450.1 Poptr1|545853,Poptr1|702356  
Poptr1|573590,Poptr1|596604  
Poptr1|596603  
Poptr1|103118  
AT5G23890.1 Poptr1|734202,Poptr1|699314  
AT5G52410.2  
AT2G38040.1 Poptr1|560869,Poptr1|576915  
AT5G44750.1 Poptr1|557456  
Poptr1|572223  
AT4G27440.1,AT5G54190.1 Poptr1|568934,Poptr1|670102  
AT1G03630.1 Poptr1|571754  
AT1G21610.1,AT1G77310.1 Poptr1|551413,Poptr1|559284  
Poptr1|71564,Poptr1|562513  
Poptr1|643578  
Poptr1|654686  
AT1G33680.1,AT4G10070.1 Poptr1|702518  
Poptr1|678218  
Poptr1|678217  
AT1G08860.1 Poptr1|570912  
AT5G61900.1,AT5G07300.1 Poptr1|699340,Poptr1|733789  
Poptr1|107069  
AT2G27480.1 Poptr1|594970,Poptr1|721319  
AT5G04170.1,AT3G10300.3 Poptr1|717568,Poptr1|734873  
AT2G14890.1 Poptr1|557478,Poptr1|549973  
AT4G37450.1 Poptr1|558921,Poptr1|553935  
AT5G10430.1  
AT2G23130.1  
AT2G25970.1 Poptr1|668798,Poptr1|653922  
AT4G31580.1,AT2G24590.1 Poptr1|583120,Poptr1|578368  
Poptr1|583122  
AT1G22840.1,AT4G10040.1 Poptr1|594310,Poptr1|738752,Poptr1|594184,Poptr1|592347  
AT2G21390.1,AT1G62020.1 Poptr1|570035,Poptr1|733199  
AT1G74210.1 Poptr1|596420  
AT5G08030.1  
AT3G07890.1 Poptr1|343001,Poptr1|705201,Poptr1|700614  
AT5G38640.1 Poptr1|690088  
AT1G48970.1  
Poptr1|648300  
Poptr1|714386  
Poptr1|728707  
AT5G18900.1,AT3G06300.1 Poptr1|696274  
AT2G43080.1 Poptr1|684206  
AT3G28480.1,AT3G28490.1 Poptr1|577548  
AT4G25600.1 Poptr1|356221  
AT1G20270.1 Poptr1|52240  
AT4G33910.1 Poptr1|722373  
AT2G23096.1  
Poptr1|565697  
Poptr1|565695  
Poptr1|577550  
Poptr1|593788,Poptr1|585678  
Poptr1|550833  
Poptr1|341617  
AT5G39900.1 Poptr1|736254  
AT5G08650.1 Poptr1|65192  
Poptr1|641995  
AT4G25340.1 Poptr1|570573  
AT3G12340.1  
Poptr1|734033  
Poptr1|696216  
AT5G06110.1,AT3G11450.1 Poptr1|555116,Poptr1|547746  
AT3G15790.1 Poptr1|578938  
AT1G15340.1  
AT5G16870.1 Poptr1|665401,Poptr1|689928

AT4G32900.1 Poptr1|561744  
AT3G03010.1  
AT4G19200.1,AT5G45350.1 Poptr1|571331  
AT2G04063.1,AT5G17650.1,AT1G31750.1  
AT3G24440.1 Poptr1|99612  
Poptr1|669286  
Poptr1|669285  
AT1G05830.1,AT2G31650.1 Poptr1|572888,Poptr1|343045  
AT3G44750.1 Poptr1|589563,Poptr1|697116,Poptr1|679813  
AT5G22650.1  
AT2G27840.1  
AT5G03740.1  
Poptr1|582808  
AT4G31360.1,AT2G24440.1 Poptr1|580191,Poptr1|705017,Poptr1|579270,Poptr1|592557,Poptr1|583169  
AT1G14130.1,AT1G14120.1 Poptr1|569214,Poptr1|691928  
AT1G17020.1,AT4G25310.1,AT1G17010.1,AT4G25300.1,AT1G78550.1  
Poptr1|642190,Poptr1|684065,Poptr1|550348  
AT3G21420.1 Poptr1|54952  
AT5G05600.1,AT3G11180.1 Poptr1|698494,Poptr1|353685  
AT1G15550.1,AT1G80340.1 Poptr1|48812,Poptr1|349528  
AT1G02400.1 Poptr1|57164,Poptr1|348383,Poptr1|353992  
AT1G77330.1 Poptr1|559288,Poptr1|710897  
AT3G12900.1 Poptr1|51800  
AT1G52790.1 Poptr1|709592  
AT4G16330.1 Poptr1|727538  
AT5G07480.1 Poptr1|63322  
AT4G10490.1,AT4G10500.1 Poptr1|550478,Poptr1|57123,Poptr1|56061,Poptr1|65793  
AT1G78440.1 Poptr1|546400,Poptr1|698991,Poptr1|550316  
AT4G21200.1 Poptr1|555375,Poptr1|568216  
AT3G49620.1,AT3G50210.1,AT3G49630.1 Poptr1|686051  
AT5G08640.1 Poptr1|342436,Poptr1|689203,Poptr1|704457,Poptr1|690250  
AT1G05010.1 Poptr1|552732,Poptr1|704904,Poptr1|573016,Poptr1|568162  
AT1G49390.1,AT5G20550.1,AT5G54000.1,AT5G20400.1 Poptr1|578863,Poptr1|98749  
AT2G36690.1 Poptr1|698707  
AT1G52820.1 Poptr1|548641  
AT2G30830.1,AT2G30840.1,AT1G03400.1,AT5G59540.1,AT1G06640.1,AT1G06620.1,AT1G06650.2,AT1G03410.1,A  
T3G61400.1,AT5G59530.1 Poptr1|55078  
AT4G22880.1 Poptr1|682056,Poptr1|548547  
AT3G47190.1,AT5G58660.1 Poptr1|706566  
AT4G23340.1 Poptr1|350024,Poptr1|350233,Poptr1|342752  
AT2G19590.1 Poptr1|561093  
AT3G19000.1 Poptr1|682489  
AT4G25420.1,AT5G51810.1 Poptr1|346112,Poptr1|347900,Poptr1|666953  
AT4G16770.1 Poptr1|684983  
AT1G55290.1,AT3G13610.1 Poptr1|62715,Poptr1|639660  
AT3G51240.1 Poptr1|703378  
AT5G24530.1 Poptr1|569679,Poptr1|574636  
AT3G55970.1  
AT1G80330.1  
AT4G21690.1  
AT1G47990.1  
AT1G52800.1  
AT1G15540.1  
AT3G60290.1,AT2G44800.1  
AT2G34555.1,AT1G30040.1  
AT5G63580.1,AT5G43935.1,AT5G63590.1,AT5G63600.2  
AT5G63595.1  
AT1G62380.1,AT1G12010.1  
AT2G06960.1  
AT1G52810.1,AT1G28030.1  
AT4G03050.2,AT4G03060.1,AT4G03070.1  
AT5G43440.1,AT1G04380.1,AT5G43450.1,AT1G04350.1  
AT4G22870.1  
AT5G51310.1  
AT3G19010.1  
AT5G07200.1,AT1G60980.1  
AT4G16765.1  
AT5G12270.1  
Poptr1|558157  
Poptr1|54771  
Poptr1|105969  
Poptr1|550094  
Poptr1|581787  
Poptr1|583277  
Poptr1|688835,Poptr1|351920,Poptr1|653131  
Poptr1|578149,Poptr1|352859  
Poptr1|723959  
Poptr1|562872  
Poptr1|76010  
Poptr1|582576,Poptr1|550472,Poptr1|569255,Poptr1|65791,Poptr1|65790,Poptr1|569254,Poptr1|705513  
Poptr1|97838,Poptr1|551050,Poptr1|551051  
Poptr1|550471



Poptr1|585537  
Poptr1|595272  
Poptr1|551056  
Poptr1|569083,Poptr1|569082,Poptr1|102004  
Poptr1|354395  
Poptr1|671897  
Poptr1|649117  
Poptr1|596684  
Poptr1|592689,Poptr1|594038,Poptr1|740865  
Poptr1|578862  
Poptr1|106084  
Poptr1|351586  
Poptr1|583657  
Poptr1|593508  
Poptr1|580445  
Poptr1|583276  
Poptr1|577360,Poptr1|594229,Poptr1|577357,Poptr1|673955  
Poptr1|694594  
Poptr1|344700,Poptr1|578150  
Poptr1|63726,Poptr1|63731  
Poptr1|342251,Poptr1|645172,Poptr1|692157,Poptr1|569316,Poptr1|715135  
Poptr1|566450  
Poptr1|552892  
Poptr1|56663  
Poptr1|581464,Poptr1|557330  
Poptr1|569976  
Poptr1|685156,Poptr1|53144,Poptr1|72519,Poptr1|694591  
Poptr1|108353,Poptr1|104043  
Poptr1|674620  
Poptr1|355430  
Poptr1|559681,Poptr1|581970  
AT2G13680.1 Poptr1|59928  
AT3G07160.1 Poptr1|688519  
AT3G14570.1 Poptr1|568599  
AT3G59100.1,AT1G06490.1 Poptr1|342328  
AT2G31960.1,AT1G05570.1 Poptr1|683537,Poptr1|693094  
AT2G36850.1  
AT3G14780.1  
AT5G13000.1  
AT2G30680.1  
AT4G04970.1,AT4G03550.1  
AT5G36870.1  
Poptr1|547669  
Poptr1|575290  
Poptr1|547670  
Poptr1|547668  
Poptr1|547673  
Poptr1|639701  
Poptr1|651682  
Poptr1|559489  
Poptr1|559488  
Poptr1|704671  
AT2G27230.1 Poptr1|705894  
AT1G64625.1  
Poptr1|554540,Poptr1|548281  
Poptr1|576834,Poptr1|560809  
Poptr1|558211  
AT3G26400.1,AT1G13020.1 Poptr1|354768,Poptr1|697968  
Poptr1|552502  
AT3G51840.1 Poptr1|560926,Poptr1|668054  
AT1G50440.1 Poptr1|660035,Poptr1|655647  
AT2G22120.1 Poptr1|686000,Poptr1|51741  
AT1G11020.1 Poptr1|61343,Poptr1|344403  
AT2G03590.1 Poptr1|564296,Poptr1|564295  
AT2G03520.1  
AT2G03530.1  
AT2G03600.1  
AT1G26440.3  
AT5G01740.1 Poptr1|58233,Poptr1|577106  
AT3G10985.1 Poptr1|656319,Poptr1|659435  
Poptr1|574516  
AT5G02450.1,AT3G53740.3,AT2G37600.1 Poptr1|660782,Poptr1|687849,Poptr1|667050,Poptr1|555678  
AT4G00820.1,AT1G01110.1 Poptr1|727333,Poptr1|569623,Poptr1|65757  
AT4G10640.1  
Poptr1|644646,Poptr1|664183  
Poptr1|591653,Poptr1|700760  
Poptr1|591652  
AT5G09790.1 Poptr1|75574  
AT5G24330.1 Poptr1|355321,Poptr1|574715  
Poptr1|595381  
Poptr1|595382  
AT3G25140.1 Poptr1|349007

AT3G61130.1 Poptr1|342718  
AT1G06780.1,AT2G30575.1 Poptr1|685378  
AT4G38270.1 Poptr1|595004  
AT5G54690.1 Poptr1|699993,Poptr1|569069  
AT2G38650.1 Poptr1|577255,Poptr1|589584  
AT3G01040.1,AT5G15470.1 Poptr1|556346,Poptr1|577718  
AT3G02350.1 Poptr1|590338,Poptr1|580724  
AT5G47780.1 Poptr1|744810,Poptr1|560055  
AT2G46480.1  
Poptr1|563480  
Poptr1|663862  
Poptr1|663861  
Poptr1|663863  
Poptr1|346896  
Poptr1|580067  
Poptr1|589810,Poptr1|670944  
Poptr1|597521  
AT5G03100.1,AT1G57690.1,AT1G60180.1,AT5G02910.1,AT3G03360.1,AT5G02930.1,AT3G28410.1,AT5G02700.1,AT1G49610.1,AT3G18150.1 Poptr1|65022  
AT5G02920.1  
AT3G50620.1 Poptr1|651057,Poptr1|719304  
AT5G35210.1,AT5G12400.1,AT5G22760.1 Poptr1|556935,Poptr1|557898,Poptr1|549040  
Poptr1|679825,Poptr1|556934  
AT1G52730.1,AT3G15610.1 Poptr1|709584,Poptr1|693723  
AT1G15470.1  
Poptr1|102669  
AT3G52490.1 Poptr1|352444  
AT4G29920.1 Poptr1|344193  
Poptr1|735269  
Poptr1|563549  
AT1G09640.1,AT1G57720.1 Poptr1|745516,Poptr1|596756,Poptr1|689284  
Poptr1|678180  
AT3G07720.1 Poptr1|573111  
AT3G16390.1,AT2G33070.1,AT3G16400.1,AT5G48180.1,AT1G54040.2  
AT3G16410.1  
AT1G29350.1,AT1G29370.1 Poptr1|55814  
AT5G46380.1,AT4G18150.1  
Poptr1|674782  
Poptr1|551244  
Poptr1|674781  
AT5G51400.1 Poptr1|590182,Poptr1|684928  
AT2G45010.1  
AT4G24580.1 Poptr1|559020,Poptr1|551643  
AT5G19390.1 Poptr1|691495,Poptr1|557695  
AT5G12150.1  
AT3G56150.1 Poptr1|685450,Poptr1|346644,Poptr1|58010  
AT3G22860.1  
AT4G04920.1 Poptr1|545324  
Poptr1|565382,Poptr1|545325,Poptr1|565385,Poptr1|354997  
Poptr1|670960  
Poptr1|670961,Poptr1|647761  
Poptr1|647760  
Poptr1|670959  
AT3G26080.1,AT3G26070.1 Poptr1|712158,Poptr1|691247  
AT5G47390.1 Poptr1|740017,Poptr1|343420  
AT3G16350.1 Poptr1|705811,Poptr1|693674  
AT5G45990.1,AT5G41770.1 Poptr1|63452,Poptr1|684855  
AT3G51110.1,AT3G13210.1  
AT1G57820.1,AT1G57800.1,AT5G39550.1,AT1G66050.1,AT1G66040.1 Poptr1|63211,Poptr1|693282  
AT4G08590.1  
AT3G54230.1 Poptr1|546528  
Poptr1|669949,Poptr1|552858  
Poptr1|597314  
Poptr1|586742  
AT5G66730.1,AT3G50700.1 Poptr1|346423,Poptr1|563119  
AT2G02070.1 Poptr1|566362,Poptr1|345359  
AT1G03840.1,AT5G44160.1 Poptr1|75342,Poptr1|594620  
AT1G55110.1,AT3G13810.1 Poptr1|59609,Poptr1|352667  
AT4G02670.1 Poptr1|694721  
AT2G01940.2 Poptr1|354347,Poptr1|569394  
AT2G02080.1  
AT1G14580.1  
AT1G25250.1,AT1G68130.1  
Poptr1|570812,Poptr1|671663  
Poptr1|553360,Poptr1|665027  
Poptr1|572728  
Poptr1|736898  
Poptr1|548128  
Poptr1|564736  
Poptr1|564735  
Poptr1|671662  
Poptr1|551125

Poptr1|551126  
Poptr1|670754  
AT5G40840.2 Poptr1|585273  
AT5G16270.1 Poptr1|724314  
AT5G12110.1,AT5G19510.1 Poptr1|548694,Poptr1|558203  
AT1G30230.1,AT2G18110.1  
AT2G40960.1,AT3G56680.1 Poptr1|576127,Poptr1|652547,Poptr1|583362  
AT3G10770.1,AT5G05100.1  
Poptr1|660172  
AT1G55350.1 Poptr1|547590  
Poptr1|647445  
Poptr1|647443  
Poptr1|647442  
AT5G10080.1 Poptr1|694330  
AT4G35880.1 Poptr1|696001  
AT3G51360.1,AT3G51330.1,AT2G17760.1  
AT3G51350.1,AT3G51340.1  
Poptr1|356838  
AT1G08630.1 Poptr1|699856,Poptr1|738237  
AT3G04520.1  
AT1G15060.1 Poptr1|569792  
Poptr1|656851  
Poptr1|723693,Poptr1|720173  
AT1G09430.1 Poptr1|744397,Poptr1|570673  
AT1G60810.1,AT1G10670.1 Poptr1|658317,Poptr1|657522  
AT2G39140.1 Poptr1|696967  
AT3G43340.1  
Poptr1|588282  
AT3G44160.1 Poptr1|64156,Poptr1|558214  
AT5G19620.1 Poptr1|554969,Poptr1|62971  
AT3G48620.1  
AT4G33520.3 Poptr1|63921  
AT5G44790.1 Poptr1|739789,Poptr1|349721  
AT5G21930.1 Poptr1|561582  
AT1G63440.1 Poptr1|554346,Poptr1|63556  
AT4G37270.1 Poptr1|719175  
Poptr1|640820,Poptr1|586671  
Poptr1|593037,Poptr1|553485  
Poptr1|640821,Poptr1|553486  
Poptr1|676974,Poptr1|712234  
Poptr1|108694  
Poptr1|561581,Poptr1|668858  
Poptr1|109071  
Poptr1|736950  
Poptr1|588899  
Poptr1|547880,Poptr1|583107,Poptr1|554970  
Poptr1|712519  
Poptr1|694445  
AT2G38250.1,AT5G01380.1 Poptr1|560923,Poptr1|58198  
Poptr1|356752,Poptr1|554136  
AT4G35140.1 Poptr1|546274,Poptr1|697162  
AT3G45620.1,AT4G38480.1  
AT5G42950.1 Poptr1|553356,Poptr1|597190  
Poptr1|597188  
Poptr1|573253,Poptr1|597189  
Poptr1|108802  
AT1G24490.1 Poptr1|565957,Poptr1|354722  
AT2G28800.1 Poptr1|697659,Poptr1|706186  
AT4G04955.1 Poptr1|693923  
Poptr1|587504  
AT5G56050.1,AT4G26490.1 Poptr1|550634,Poptr1|98128  
AT5G56070.1  
AT5G01015.1 Poptr1|676197,Poptr1|668274  
AT1G65295.1 Poptr1|665570  
AT3G50830.1 Poptr1|719392  
AT4G37220.1  
Poptr1|697308  
AT1G04050.1,AT5G43990.2 Poptr1|573366,Poptr1|553311  
AT3G04380.1 Poptr1|571112  
Poptr1|72913  
Poptr1|586120  
Poptr1|546271  
AT3G12500.1 Poptr1|556708,Poptr1|649164  
AT3G54420.1 Poptr1|665854,Poptr1|745071  
AT4G01700.1,AT1G02360.1 Poptr1|57143,Poptr1|692222  
AT3G16920.1 Poptr1|698300  
Poptr1|694264  
Poptr1|556713,Poptr1|697148,Poptr1|721563,Poptr1|557007  
Poptr1|649160  
Poptr1|558799  
Poptr1|557011,Poptr1|649163  
Poptr1|677164

Poptr1|582769,Poptr1|574380,Poptr1|689314,Poptr1|574381  
Poptr1|109098  
Poptr1|564414  
AT3G09560.1 Poptr1|667714  
AT5G42870.1  
Poptr1|653756  
Poptr1|735414  
AT1G77840.1 Poptr1|584639,Poptr1|590689,Poptr1|693894,Poptr1|553039  
AT1G36730.1  
AT3G61640.1,AT2G46330.1 Poptr1|572354  
AT5G24105.1 Poptr1|586571,Poptr1|569476  
AT5G53250.1  
Poptr1|640391,Poptr1|554456  
Poptr1|669297  
AT4G31080.1,AT2G24330.1 Poptr1|677988,Poptr1|583212  
AT4G31090.1  
Poptr1|591439  
AT2G44350.2 Poptr1|690348  
AT3G60100.1  
AT2G11270.1  
Poptr1|650343  
AT2G32000.1 Poptr1|572917  
AT5G63920.1 Poptr1|71557  
Poptr1|572916  
AT3G18295.1,AT1G48770.1 Poptr1|569808  
AT1G68340.1,AT1G25370.1 Poptr1|566601  
Poptr1|591802  
AT2G33980.1,AT1G28960.1 Poptr1|545218,Poptr1|55909  
Poptr1|544704,Poptr1|545217  
Poptr1|577020  
AT5G35590.1,AT2G05840.1 Poptr1|682259,Poptr1|577208  
AT3G24180.1 Poptr1|711954  
AT5G49900.1 Poptr1|742552,Poptr1|583485  
AT1G33700.1,AT4G10060.1  
Poptr1|702520  
AT2G48040.1 Poptr1|572791  
AT2G48050.1 Poptr1|572792  
Poptr1|585557  
AT4G04860.1,AT4G21810.1 Poptr1|727410,Poptr1|555348  
AT3G10040.1 Poptr1|58122,Poptr1|103740  
AT1G21200.1 Poptr1|347129,Poptr1|559372  
AT1G76870.1  
Poptr1|547879,Poptr1|554971  
AT1G04420.1 Poptr1|696366  
Poptr1|666263  
AT3G63150.1 Poptr1|52090,Poptr1|687936,Poptr1|689862  
AT5G27540.1  
AT3G05310.1  
AT3G07740.1 Poptr1|573093  
AT4G16420.1  
AT5G14320.1 Poptr1|559187,Poptr1|684496  
AT1G77750.1 Poptr1|643670  
AT1G17880.1,AT1G73230.1 Poptr1|743498  
Poptr1|714256,Poptr1|703297  
Poptr1|699629  
AT5G02870.1,AT3G09630.1 Poptr1|576639,Poptr1|585837,Poptr1|739313  
Poptr1|589385  
AT1G57790.1 Poptr1|576591,Poptr1|561499  
AT3G18720.1,AT3G29150.1  
AT3G56470.1  
AT4G10695.1,AT4G10660.1  
AT1G49360.1  
AT4G12370.1  
AT4G10700.1  
AT2G44735.1  
Poptr1|570347  
AT5G61210.1 Poptr1|688436,Poptr1|345878  
AT1G13890.1 Poptr1|564278  
AT5G07880.1  
AT2G40410.2 Poptr1|564092,Poptr1|55450  
AT3G56170.1  
AT5G51710.1 Poptr1|728642,Poptr1|575711  
AT5G11800.1,AT2G19600.1 Poptr1|352693  
Poptr1|588984  
AT1G62870.1,AT1G12380.1 Poptr1|60461  
Poptr1|570574  
Poptr1|350113  
AT5G53190.1 Poptr1|586564,Poptr1|569481  
AT1G21460.1 Poptr1|692768,Poptr1|551366,Poptr1|694605  
AT4G10850.1,AT1G66770.1 Poptr1|350380  
AT5G13170.1 Poptr1|554733,Poptr1|63173  
AT2G39060.1 Poptr1|592972

AT3G14770.1 Poptr1|746249,Poptr1|707872  
AT3G28007.1 Poptr1|706793  
AT3G48740.1,AT5G50800.1,AT4G25010.1,AT5G23660.1 Poptr1|575409  
AT3G16690.1,AT4G15920.1 Poptr1|596138,Poptr1|570771  
AT5G40260.1  
Poptr1|551365  
Poptr1|551367  
Poptr1|65389  
Poptr1|581895,Poptr1|729499  
Poptr1|729496  
AT2G39050.1 Poptr1|738410  
AT5G01610.1,AT3G08890.1,AT5G37070.1 Poptr1|577052,Poptr1|560948  
AT2G03350.1 Poptr1|656488,Poptr1|724081  
AT3G12480.1 Poptr1|647368,Poptr1|683549  
AT5G19490.1  
Poptr1|558167,Poptr1|548700  
AT1G75850.1 Poptr1|52232,Poptr1|346669  
AT2G17790.1  
AT3G51310.1  
Poptr1|597398  
AT3G11940.1,AT2G37270.1 Poptr1|576427,Poptr1|561203  
AT5G39740.1,AT3G25520.1 Poptr1|732571,Poptr1|580407,Poptr1|672284  
Poptr1|572565  
AT2G30630.2,AT1G06750.1,AT1G04280.1 Poptr1|72848,Poptr1|345442,Poptr1|720947,Poptr1|551081  
Poptr1|657253  
Poptr1|643189  
AT3G07330.1 Poptr1|692052  
AT5G03760.1 Poptr1|589559  
AT5G22740.1 Poptr1|594843,Poptr1|556940  
AT4G07960.1 Poptr1|694461,Poptr1|692569  
AT2G24630.1,AT4G31590.1 Poptr1|578365,Poptr1|353078  
AT3G28180.1  
Poptr1|665060  
Poptr1|107109  
Poptr1|590241  
Poptr1|105934,Poptr1|573344  
Poptr1|581827  
Poptr1|687416,Poptr1|686549  
Poptr1|579109  
Poptr1|595689  
Poptr1|562292  
Poptr1|579346  
Poptr1|745288  
AT4G18593.1 Poptr1|576161,Poptr1|351417  
Poptr1|693977  
AT3G54500.1 Poptr1|62920,Poptr1|693173  
Poptr1|647277  
Poptr1|555020,Poptr1|350844,Poptr1|101483,Poptr1|590277,Poptr1|585137  
Poptr1|585313  
AT2G20320.1 Poptr1|553285  
AT5G35560.1 Poptr1|689344  
Poptr1|582928  
AT1G29800.1 Poptr1|555626  
AT3G43230.1 Poptr1|58436,Poptr1|739247  
AT3G20870.1 Poptr1|690889,Poptr1|693189  
AT3G11560.3,AT5G06220.1 Poptr1|561464,Poptr1|576552  
Poptr1|64049,Poptr1|595164  
AT1G52600.1 Poptr1|640627,Poptr1|341592  
AT3G15710.1  
Poptr1|583152,Poptr1|61206  
AT3G13350.1 Poptr1|582531  
AT1G76110.1 Poptr1|559898  
AT1G04880.1 Poptr1|736102,Poptr1|49261  
AT1G55650.1  
AT1G27170.1,AT5G45210.1,AT5G45260.1,AT1G27180.1,AT3G51560.1,AT5G45050.1  
Poptr1|97025,Poptr1|595611,Poptr1|588403,Poptr1|574150,Poptr1|105895,Poptr1|590956,Poptr1|56627,P  
optr1|675386,Poptr1|103366,Poptr1|107459,Poptr1|75664,Poptr1|547803,Poptr1|594780,Poptr1|654352,Poptr1|5909  
31,Poptr1|738129,Poptr1|574938,Poptr1|568109,Poptr1|574429,Poptr1|587435,Poptr1|574939,Poptr1|345823,Poptr1|  
747135,Poptr1|107579,Poptr1|573530,Poptr1|573528,Poptr1|718152,Poptr1|580409,Poptr1|104895,Poptr1|590964,P  
optr1|573552,Poptr1|581005,Poptr1|670305,Poptr1|109095,Poptr1|593668,Poptr1|588662,Poptr1|595305,Poptr1|342  
313,Poptr1|548096  
AT1G61105.1 Poptr1|703971,Poptr1|545040,Poptr1|568942  
AT5G36930.1  
Poptr1|104433,Poptr1|570504,Poptr1|573632,Poptr1|573549,Poptr1|588922,Poptr1|580152,Poptr1|57364  
9,Poptr1|581139  
AT1G63730.1,AT5G17970.1,AT5G41550.1,AT3G44480.1,AT5G46450.1,AT1G56540.1,AT4G16950.1,AT4G23515.1,A  
T5G38350.1,AT3G44400.1,AT5G41750.1,AT1G56520.1,AT4G16900.1,AT5G18350.1,AT5G51630.1,AT4G19920.1,AT  
5G48780.1,AT3G51570.1,AT3G25510.1,AT4G16940.1,AT3G04220.1,AT4G19500.1,AT5G49140.1,AT5G22690.1,AT2  
G16870.1,AT4G16920.1,AT5G18360.1,AT5G44510.1,AT3G44630.3,AT1G47370.1,AT5G18370.1,AT1G63870.1,AT1G  
57630.1,AT1G57670.1,AT4G16960.1,AT4G36150.1,AT2G32140.1,AT5G46260.1,AT1G72870.1,AT1G64070.1,AT4G1  
2020.1,AT4G12010.1,AT4G11170.1  
AT4G19925.1

AT2G17050.1  
AT1G52900.1  
AT4G19515.1,AT5G38344.1  
AT5G45070.1  
Poptr1|581613,Poptr1|97570,Poptr1|583423,Poptr1|65472,Poptr1|581615  
Poptr1|107266  
Poptr1|579259  
Poptr1|583828  
Poptr1|576698  
Poptr1|582175  
Poptr1|100511,Poptr1|670309,Poptr1|573553,Poptr1|671505,Poptr1|106651,Poptr1|573628,Poptr1|10321  
1,Poptr1|584305,Poptr1|101049,Poptr1|675721,Poptr1|596219,Poptr1|665230,Poptr1|98878,Poptr1|583892,Poptr1|59  
6129,Poptr1|579981,Poptr1|571593,Poptr1|675022,Poptr1|559518,Poptr1|665556,Poptr1|654353,Poptr1|108141,Poptr  
r1|670314,Poptr1|568118,Poptr1|592390,Poptr1|670308,Poptr1|670316,Poptr1|587422  
Poptr1|670304,Poptr1|106349,Poptr1|573551  
Poptr1|705127,Poptr1|597248  
Poptr1|75283  
Poptr1|60216  
Poptr1|580691,Poptr1|579108,Poptr1|582803  
Poptr1|665169  
Poptr1|573554,Poptr1|573627  
Poptr1|584336  
Poptr1|108360  
Poptr1|343067  
AT1G28210.2 Poptr1|559037  
AT3G13310.1 Poptr1|562450,Poptr1|704511,Poptr1|550642  
AT5G59610.1 Poptr1|708909  
AT5G48030.1 Poptr1|64592,Poptr1|697485  
AT4G39960.1,AT2G22360.1 Poptr1|695876,Poptr1|51710  
AT4G09350.1 Poptr1|592274  
AT3G17830.1 Poptr1|575039  
Poptr1|560058  
Poptr1|108248  
Poptr1|590638  
AT3G06540.1 Poptr1|588654  
Poptr1|101186  
Poptr1|71891  
Poptr1|596331  
AT4G36910.1 Poptr1|558887  
AT4G34120.1 Poptr1|642012,Poptr1|722241  
Poptr1|719238  
AT4G01150.1 Poptr1|731247,Poptr1|644547  
AT4G38100.1 Poptr1|694464  
AT1G16080.1 Poptr1|587185,Poptr1|747358,Poptr1|554921,Poptr1|554915  
Poptr1|547715,Poptr1|579630  
Poptr1|639740  
AT5G65720.1 Poptr1|718084  
Poptr1|353122  
AT5G16250.1,AT3G02640.1 Poptr1|687292,Poptr1|656346  
AT5G36800.1,AT5G36710.1  
Poptr1|596377  
Poptr1|582742,Poptr1|747308  
Poptr1|595662  
AT2G26670.1,AT1G69720.1 Poptr1|560611  
AT2G26550.1 Poptr1|703100  
AT1G58300.1  
AT5G62600.1 Poptr1|570025  
Poptr1|666382,Poptr1|570023  
Poptr1|666384  
Poptr1|666383  
AT1G22850.1 Poptr1|740833,Poptr1|702517  
AT4G38040.1 Poptr1|685245  
AT5G19670.1,AT5G25820.1,AT4G32790.1 Poptr1|578513  
AT3G42180.1,AT5G33290.1 Poptr1|58782  
AT5G11130.1 Poptr1|578233  
AT5G03795.1 Poptr1|589547  
AT4G16745.1 Poptr1|349754  
AT5G25310.1 Poptr1|58570  
AT5G11610.1  
AT5G37000.1  
Poptr1|562344,Poptr1|570189,Poptr1|575273,Poptr1|75518  
Poptr1|563945,Poptr1|567360,Poptr1|562350  
Poptr1|702441,Poptr1|548149  
Poptr1|562345  
Poptr1|562348  
Poptr1|711864  
Poptr1|75509  
Poptr1|561753  
Poptr1|653996  
Poptr1|669359  
Poptr1|736995  
Poptr1|653997

Poptr1|583680  
Poptr1|573137  
Poptr1|589546  
Poptr1|554644  
AT5G17710.2 Poptr1|571297  
AT1G36390.1 Poptr1|559168,Poptr1|711004,Poptr1|72394  
AT5G13430.1,AT5G13440.1 Poptr1|548109,Poptr1|554683  
AT5G52270.1 Poptr1|570458  
AT1G11890.1 Poptr1|553800,Poptr1|704797  
AT1G75400.1,AT1G19680.1 Poptr1|715287,Poptr1|342210  
AT4G39140.1,AT2G21500.1 Poptr1|713044,Poptr1|697255  
Poptr1|578869,Poptr1|672976  
AT1G75180.1,AT1G19400.1 Poptr1|553348  
AT1G01500.1 Poptr1|572305,Poptr1|552208  
Poptr1|556463,Poptr1|722038  
AT1G17860.1 Poptr1|590804,Poptr1|61167,Poptr1|555578,Poptr1|713741  
AT1G73325.1  
AT1G73260.1  
AT1G73330.1  
AT1G72290.1  
Poptr1|746483,Poptr1|555576  
AT3G48830.1,AT5G23690.1 Poptr1|575438,Poptr1|346036  
AT2G17580.1 Poptr1|71881  
Poptr1|350556  
AT2G31955.1 Poptr1|558146  
Poptr1|586017  
Poptr1|60838  
Poptr1|102405  
AT5G27700.1,AT3G53890.1 Poptr1|690220,Poptr1|682822  
Poptr1|672790  
AT4G29590.1 Poptr1|352080  
AT3G01660.1 Poptr1|549596  
AT3G17100.1 Poptr1|656628,Poptr1|566854  
AT1G09250.1 Poptr1|570704,Poptr1|97631  
AT3G06590.1  
AT3G05800.1  
AT2G33550.1 Poptr1|548101,Poptr1|554693  
Poptr1|575455  
AT2G21790.1 Poptr1|51760,Poptr1|686016  
Poptr1|559402  
Poptr1|347102  
AT1G49970.1 Poptr1|682499  
AT1G09130.1 Poptr1|699732  
Poptr1|673718,Poptr1|642086  
AT2G46380.1,AT3G61670.1 Poptr1|731271  
AT4G01090.1,AT1G01440.1  
Poptr1|640382,Poptr1|646729  
AT5G03850.1,AT5G64140.1,AT3G10090.1 Poptr1|701415,Poptr1|655714,Poptr1|660106  
AT5G13980.1 Poptr1|572859,Poptr1|687835  
AT3G26720.1 Poptr1|692100  
AT5G66150.1 Poptr1|343456  
Poptr1|570344  
Poptr1|572860  
AT1G07110.1 Poptr1|683885  
Poptr1|557657  
Poptr1|697447  
AT5G01170.1,AT3G09070.1 Poptr1|576924,Poptr1|560877  
AT5G58930.1,AT3G46990.1 Poptr1|650171,Poptr1|641100  
AT2G38070.1  
AT4G38510.1 Poptr1|697166,Poptr1|546263  
AT1G20260.2,AT1G76030.1  
AT5G17980.1 Poptr1|56700  
AT1G74720.1 Poptr1|58183,Poptr1|351896  
AT4G11610.1 Poptr1|554351,Poptr1|63554  
AT1G04150.1 Poptr1|343196  
AT5G48060.1 Poptr1|641406  
AT1G22610.1 Poptr1|592286  
AT5G12970.1 Poptr1|639904  
AT3G57880.1,AT1G51570.1 Poptr1|583627  
AT3G03680.1 Poptr1|571278,Poptr1|571279  
AT5G03435.1,AT3G61720.1  
AT4G20080.1  
AT5G44760.1  
Poptr1|587080,Poptr1|561956  
Poptr1|731078,Poptr1|552158  
Poptr1|667399  
Poptr1|738797  
Poptr1|344815,Poptr1|580899,Poptr1|546461  
Poptr1|734933,Poptr1|595975,Poptr1|580928  
AT5G10860.1 Poptr1|673753,Poptr1|571952  
Poptr1|108899  
Poptr1|551006,Poptr1|559736

Poptr1|585578  
AT5G02310.1 Poptr1|652973  
AT5G42760.1 Poptr1|691993  
AT5G23540.1 Poptr1|683221,Poptr1|684401  
AT2G38670.1 Poptr1|739745  
Poptr1|701714,Poptr1|351626,Poptr1|736609  
AT1G10150.1,AT1G59510.1 Poptr1|347564,Poptr1|663714  
AT3G49790.1  
Poptr1|571990,Poptr1|563340  
AT5G51100.1 Poptr1|575503  
AT5G23310.1 Poptr1|71779  
AT4G25100.1  
Poptr1|570401,Poptr1|588188  
AT5G20990.1 Poptr1|556880  
Poptr1|594905  
AT2G24390.1 Poptr1|690526,Poptr1|60822  
AT5G39720.1,AT3G28950.1,AT5G39730.1,AT3G28930.1,AT4G31310.1,AT3G28940.1  
AT3G24500.1 Poptr1|669292  
AT2G42680.1,AT3G58680.1 Poptr1|682717,Poptr1|683452  
AT2G40730.1 Poptr1|58972,Poptr1|700037  
Poptr1|573361,Poptr1|587382,Poptr1|587695  
Poptr1|554976  
Poptr1|668081  
AT1G67560.1 Poptr1|55007  
AT1G17420.1,AT1G72520.1 Poptr1|704788,Poptr1|349431  
AT3G22400.1 Poptr1|686250,Poptr1|687106  
AT3G45140.1 Poptr1|697684,Poptr1|63009,Poptr1|701740,Poptr1|547909,Poptr1|708571  
Poptr1|354682  
Poptr1|354681  
Poptr1|586391  
Poptr1|108955  
Poptr1|592052  
Poptr1|583250,Poptr1|547905  
Poptr1|747735  
Poptr1|583249  
Poptr1|547908  
Poptr1|597461  
AT3G19340.1 Poptr1|343128,Poptr1|700517  
AT5G61930.1 Poptr1|733784  
AT5G57930.2 Poptr1|578739,Poptr1|561339  
AT1G64810.2 Poptr1|582335  
AT3G21740.1 Poptr1|594465  
AT1G26220.1 Poptr1|564462  
AT1G32070.2 Poptr1|577212  
Poptr1|672550  
Poptr1|583001  
AT1G26760.1 Poptr1|564232  
Poptr1|564239,Poptr1|579152  
AT2G03120.1 Poptr1|706551,Poptr1|649855  
AT5G26710.1 Poptr1|704334  
AT1G44820.1,AT1G44180.1 Poptr1|643640  
AT4G38220.2 Poptr1|721245,Poptr1|703580  
AT2G19750.1,AT4G29390.1,AT5G56670.1 Poptr1|575241,Poptr1|664653,Poptr1|728731  
AT1G29410.2,AT1G07780.1,AT5G05590.1 Poptr1|564037,Poptr1|728534  
Poptr1|573295,Poptr1|100123,Poptr1|103582  
AT4G29410.1,AT2G19730.1 Poptr1|553546,Poptr1|691315  
AT5G42190.1 Poptr1|682197,Poptr1|593811,Poptr1|692990,Poptr1|713359  
AT2G03170.1,AT4G34210.1,AT1G10230.1,AT2G03160.1,AT2G03190.1,AT3G25650.1,AT1G75950.1,AT4G34470.1  
AT3G60010.1  
AT1G20140.1,AT2G25700.1  
AT3G21830.1,AT3G21860.1,AT3G21850.1,AT3G21840.1  
AT2G20160.1  
AT3G53060.1,AT3G60020.1  
Poptr1|649204  
Poptr1|355925  
AT4G24610.1 Poptr1|551641  
AT5G48310.1 Poptr1|57364  
AT5G65440.1  
Poptr1|551640  
AT1G33270.1 Poptr1|548763,Poptr1|712254  
AT1G31160.1 Poptr1|666877  
Poptr1|586669  
Poptr1|578724  
AT3G57180.1 Poptr1|560441  
AT4G10620.1 Poptr1|62742  
Poptr1|576220  
Poptr1|555251  
AT3G27390.1,AT5G40640.1 Poptr1|64870  
AT4G37030.1 Poptr1|76128  
Poptr1|76198  
AT1G75230.2,AT1G19480.1 Poptr1|559729,Poptr1|643115  
AT3G50880.1 Poptr1|585454,Poptr1|655318



AT4G25030.1 Poptr1|696937,Poptr1|724933  
AT5G45410.1 Poptr1|592975  
AT1G30000.1 Poptr1|694098  
AT3G21160.1,AT1G51590.1 Poptr1|655661  
Poptr1|579017  
AT5G60750.1 Poptr1|646685,Poptr1|548394  
AT5G64610.1,AT5G09740.1 Poptr1|347312,Poptr1|559176  
AT4G14950.1 Poptr1|726583,Poptr1|696428  
AT1G05360.1 Poptr1|570835,Poptr1|595609  
Poptr1|590667  
Poptr1|595625  
AT1G74060.1,AT1G18540.1,AT1G74050.1 Poptr1|682505,Poptr1|641408  
AT1G04810.1,AT2G32730.1 Poptr1|688903,Poptr1|691704  
Poptr1|556723  
AT2G20770.1 Poptr1|730486  
AT1G52920.1 Poptr1|579497  
AT5G65280.1 Poptr1|558500,Poptr1|718705  
Poptr1|568933  
AT1G15140.1 Poptr1|686314,Poptr1|687171  
Poptr1|595701  
AT1G58290.1,AT1G09940.1 Poptr1|710027  
AT2G31250.1 Poptr1|642159,Poptr1|54575  
AT3G59540.1,AT2G43460.1 Poptr1|656327,Poptr1|654438,Poptr1|679624,Poptr1|567190  
AT5G03415.1 Poptr1|735523,Poptr1|739513  
AT5G02470.1  
AT5G53150.1 Poptr1|350618,Poptr1|355226,Poptr1|570267,Poptr1|574808,Poptr1|63140  
AT2G01710.1 Poptr1|72202,Poptr1|551655  
AT2G05230.1,AT2G05250.1 Poptr1|645000,Poptr1|664876  
AT2G35540.1 Poptr1|554071  
AT5G27240.1 Poptr1|595526  
AT5G62780.1,AT5G37750.1,AT5G37440.1,AT4G19580.1  
AT5G37380.1  
AT4G19570.1,AT4G19590.1  
AT1G09260.1,AT2G25560.1  
AT5G35753.1  
AT4G27980.1,AT3G05110.1,AT3G04960.1  
AT3G04980.1 Poptr1|581015  
AT1G16500.1,AT1G79160.1 Poptr1|53272,Poptr1|71845  
Poptr1|101127,Poptr1|569288,Poptr1|677496,Poptr1|588522,Poptr1|672774,Poptr1|591392,Poptr1|10715  
7  
AT5G06270.1 Poptr1|576538,Poptr1|561441  
AT3G11600.1 Poptr1|648965,Poptr1|679905  
Poptr1|567906  
AT5G16460.1 Poptr1|596969  
AT1G29760.1,AT2G34380.1 Poptr1|660721  
Poptr1|593318  
Poptr1|555622  
Poptr1|568774  
AT3G50340.1,AT5G67020.1 Poptr1|558867,Poptr1|76110  
AT2G22790.1 Poptr1|76462  
AT4G06599.1 Poptr1|645619,Poptr1|584478  
Poptr1|574030,Poptr1|553381,Poptr1|553379  
Poptr1|553382,Poptr1|553380  
Poptr1|680180  
AT5G16290.1 Poptr1|564127  
AT2G31810.2 Poptr1|562116  
Poptr1|567156  
Poptr1|567157  
AT2G29700.1 Poptr1|549078,Poptr1|650148  
AT5G05710.1 Poptr1|353658  
AT2G17480.1 Poptr1|76039,Poptr1|694387  
AT1G11000.1 Poptr1|99178  
AT1G61560.1,AT2G39200.1,AT1G11310.1 Poptr1|724952,Poptr1|686530  
AT1G26700.1,AT5G53760.1 Poptr1|55969,Poptr1|689984  
AT3G45290.1 Poptr1|583474  
AT4G02600.1 Poptr1|730115  
AT1G42560.1,AT2G33670.1,AT2G17430.1,AT5G65970.1  
Poptr1|593823  
Poptr1|346553,Poptr1|558261,Poptr1|562902,Poptr1|73183  
Poptr1|596585,Poptr1|546445,Poptr1|99942  
Poptr1|596586  
Poptr1|576672  
Poptr1|580708  
Poptr1|589415  
Poptr1|594745,Poptr1|746292,Poptr1|53028,Poptr1|594744,Poptr1|585035  
Poptr1|640221  
Poptr1|562901

AT5G08050.1 Poptr1|689876  
 AT1G74730.1 Poptr1|569992,Poptr1|704274,Poptr1|587657  
 AT1G75990.1,AT1G20200.1 Poptr1|721660,Poptr1|556658  
     Poptr1|346652  
     Poptr1|106210  
     Poptr1|346653  
 AT5G28050.2 Poptr1|699820,Poptr1|742075,Poptr1|565482  
 AT3G05300.1  
 AT4G26850.1,AT5G55120.1 Poptr1|691788,Poptr1|727930  
     Poptr1|552990  
 AT3G02570.1 Poptr1|60396,Poptr1|545348  
 AT1G67070.1  
 AT3G20000.1 Poptr1|730689,Poptr1|563402  
 AT1G50400.1  
 AT5G61820.1 Poptr1|582643,Poptr1|701077,Poptr1|662261,Poptr1|575486,Poptr1|575484  
     Poptr1|103775,Poptr1|108099  
 AT1G36320.1 Poptr1|716554  
 AT4G37920.1 Poptr1|655603  
     Poptr1|643698  
     Poptr1|710999  
     Poptr1|655604  
 AT2G13360.1 Poptr1|641050,Poptr1|697575  
 AT4G16130.1 Poptr1|61038  
 AT3G42850.1  
     Poptr1|746579  
     Poptr1|582277  
     Poptr1|593228  
 AT3G18670.1 Poptr1|595383,Poptr1|53122  
 AT5G04680.1,AT5G04690.1,AT5G04700.1  
     Poptr1|563613,Poptr1|563608,Poptr1|655795,Poptr1|563603  
     Poptr1|103184,Poptr1|568129,Poptr1|575584,Poptr1|568151,Poptr1|568157,Poptr1|568130,Poptr1|56813  
 3,Poptr1|568132,Poptr1|595979,Poptr1|575644  
     Poptr1|575585,Poptr1|551134,Poptr1|568137,Poptr1|586018,Poptr1|575594,Poptr1|584730  
     Poptr1|587758,Poptr1|568154,Poptr1|587757  
     Poptr1|582425  
     Poptr1|109262  
 AT5G65750.1 Poptr1|698598,Poptr1|686501  
 AT3G55410.1  
 AT4G34350.1 Poptr1|557296,Poptr1|556431  
     Poptr1|586227  
     Poptr1|674402  
 AT4G30170.1,AT2G18980.1 Poptr1|737716  
 AT1G44970.1 Poptr1|346771  
 AT4G17690.1,AT5G47000.1 Poptr1|570048,Poptr1|355029  
 AT4G21960.1 Poptr1|555323  
 AT1G68850.1 Poptr1|658994,Poptr1|686350  
 AT5G42180.1 Poptr1|741255,Poptr1|550845  
 AT5G15180.1,AT3G01190.1 Poptr1|654548,Poptr1|75463,Poptr1|562300  
 AT4G37520.1,AT5G67400.1,AT4G37530.1,AT3G49960.1 Poptr1|693605  
 AT4G33420.1 Poptr1|546604  
 AT5G06720.1,AT5G06730.1 Poptr1|735057  
 AT5G05340.1 Poptr1|596948  
 AT5G64120.1,AT5G39580.1 Poptr1|577049  
 AT5G19890.1 Poptr1|711777  
 AT1G71695.1 Poptr1|714784,Poptr1|714785,Poptr1|693059  
 AT1G14550.1,AT1G14540.1  
     Poptr1|49479,Poptr1|580292,Poptr1|353269,Poptr1|593058,Poptr1|597420,Poptr1|591108  
 AT5G66390.1 Poptr1|593892,Poptr1|655365  
 AT2G35380.1 Poptr1|589973  
 AT3G32980.1,AT3G49120.1,AT2G38390.1,AT4G08770.1,AT3G49110.1,AT2G38380.1,AT4G08780.1  
     Poptr1|547662,Poptr1|690824,Poptr1|683538,Poptr1|748430,Poptr1|712777,Poptr1|712490,Poptr1|55525  
 7,Poptr1|639696,Poptr1|555256  
 AT2G41480.1 Poptr1|560610  
 AT2G34060.1 Poptr1|545229,Poptr1|586081  
 AT2G37130.1 Poptr1|589413  
 AT5G22410.1 Poptr1|549004,Poptr1|582292,Poptr1|575500  
 AT1G30870.1 Poptr1|554620,Poptr1|567123  
 AT1G05260.1 Poptr1|689736,Poptr1|695794  
 AT2G22420.1 Poptr1|695869,Poptr1|694306  
 AT5G14130.1 Poptr1|742840,Poptr1|549713  
 AT5G40150.1,AT3G28200.1 Poptr1|691540  
 AT1G49570.1 Poptr1|671404  
 AT4G33870.1 Poptr1|63993,Poptr1|349565  
 AT4G16270.1 Poptr1|345188  
 AT1G34510.1,AT4G26010.1 Poptr1|571282  
 AT5G24070.1,AT2G43480.1 Poptr1|562200  
 AT4G31760.1,AT2G24800.1 Poptr1|578318,Poptr1|562023  
 AT1G24110.1  
 AT5G51890.1  
 AT1G05240.1,AT1G05250.1  
 AT5G64110.1,AT5G64100.1  
 AT3G50990.1

AT2G18150.1,AT4G36430.1,AT2G18140.1  
AT1G77100.1,AT4G25980.1  
AT4G11290.1  
AT3G21770.1  
AT3G17070.1  
AT5G17820.1,AT3G03670.1  
Poptr1|559771  
Poptr1|593266,Poptr1|75913  
Poptr1|106430,Poptr1|673338  
Poptr1|546361,Poptr1|743906,Poptr1|568220,Poptr1|555379  
Poptr1|572769  
Poptr1|562299  
Poptr1|106429,Poptr1|62767  
Poptr1|555260  
Poptr1|581477  
Poptr1|547665  
Poptr1|104338  
Poptr1|700084,Poptr1|571896  
Poptr1|734277,Poptr1|56894  
Poptr1|688861,Poptr1|56904,Poptr1|344335  
Poptr1|596949  
Poptr1|563604,Poptr1|593635  
Poptr1|581130,Poptr1|563599  
Poptr1|588790,Poptr1|583752  
Poptr1|586900  
Poptr1|580110  
Poptr1|586082  
Poptr1|548175  
Poptr1|595891,Poptr1|679511  
Poptr1|728957  
Poptr1|355422,Poptr1|574645  
Poptr1|75914  
Poptr1|558843  
Poptr1|562864  
Poptr1|596396  
AT1G78160.1 Poptr1|347371  
AT3G10360.1 Poptr1|353353  
AT5G56510.1 Poptr1|350993,Poptr1|48426  
AT2G29200.1,AT2G29140.1,AT2G29190.1 Poptr1|64350,Poptr1|558039  
AT1G22240.1  
AT4G08840.1,AT1G35730.1,AT1G35750.1  
Poptr1|347611  
Poptr1|65250,Poptr1|550537,Poptr1|592032  
Poptr1|579130,Poptr1|567395,Poptr1|563924  
Poptr1|596229  
Poptr1|348107  
Poptr1|580051  
Poptr1|641163  
AT5G42250.1 Poptr1|693015  
AT5G24760.1 Poptr1|694004  
AT5G43940.1 Poptr1|645542  
AT1G32780.1 Poptr1|65763,Poptr1|56071,Poptr1|102610  
AT1G77120.1  
Poptr1|558390,Poptr1|643524,Poptr1|595361,Poptr1|562436,Poptr1|558388,Poptr1|718553,Poptr1|56244  
1,Poptr1|718549  
AT5G63620.1 Poptr1|97949,Poptr1|58846  
AT4G22110.1,AT1G22440.1,AT1G22430.1  
AT1G64710.1  
Poptr1|589254  
Poptr1|57407  
Poptr1|597317  
Poptr1|595360,Poptr1|562439  
Poptr1|108756  
Poptr1|562438  
Poptr1|654576  
AT4G22890.1,AT4G11960.1 Poptr1|646529,Poptr1|48775  
AT3G23280.1 Poptr1|721099,Poptr1|580194  
AT4G14365.1  
Poptr1|559706  
Poptr1|559705  
Poptr1|580193  
AT5G23150.1,AT5G08230.1 Poptr1|558693,Poptr1|695970  
AT2G48160.1,AT3G63070.1  
AT3G11400.1 Poptr1|724626,Poptr1|563940  
AT5G06000.1  
Poptr1|567623  
AT1G17370.1 Poptr1|673211,Poptr1|645804  
AT3G14100.1  
AT1G54080.2  
Poptr1|583200  
AT1G80270.1,AT1G15480.1 Poptr1|667288,Poptr1|695593  
AT1G07590.1 Poptr1|558074

AT3G15590.1  
Poptr1|647351  
AT5G03730.1 Poptr1|696984,Poptr1|567981  
Poptr1|589567,Poptr1|576754  
AT5G51050.1 Poptr1|570383,Poptr1|575487  
AT5G61810.1,AT5G07320.1  
AT5G59990.1 Poptr1|98562  
AT3G61050.1 Poptr1|552084,Poptr1|56983  
AT3G60950.1,AT3G61030.1  
Poptr1|591418  
AT2G40510.1,AT3G56340.1,AT2G40590.1 Poptr1|571636,Poptr1|574100  
AT5G62750.1 Poptr1|97405  
AT5G06560.1,AT3G11850.1 Poptr1|695277,Poptr1|735173  
AT3G54740.1  
AT4G16600.1,AT2G35710.1 Poptr1|646104  
Poptr1|676386  
Poptr1|553870  
Poptr1|676387  
AT5G13140.1 Poptr1|350582  
AT3G26960.1,AT5G41050.1 Poptr1|683960,Poptr1|589740,Poptr1|586673,Poptr1|641842  
Poptr1|63169  
AT2G29210.1 Poptr1|558022  
Poptr1|641151  
Poptr1|691382  
AT3G47910.1,AT3G47890.1 Poptr1|355804,Poptr1|733165  
AT3G47900.1  
Poptr1|579668  
Poptr1|554420  
AT3G49180.1 Poptr1|703129  
Poptr1|551844  
Poptr1|568767  
Poptr1|575328  
AT3G18130.1,AT1G48630.1,AT1G18080.1 Poptr1|569764,Poptr1|574969  
AT5G58230.1 Poptr1|573230,Poptr1|552668  
AT4G35050.1,AT2G16780.1 Poptr1|694240,Poptr1|697182  
AT1G73040.1 Poptr1|570465  
AT1G19715.1 Poptr1|710793,Poptr1|72968,Poptr1|559780  
Poptr1|550960  
Poptr1|550959  
Poptr1|596961  
AT3G04090.1,AT5G18290.1 Poptr1|573880,Poptr1|571161  
Poptr1|572968,Poptr1|348613  
Poptr1|587423  
AT4G03370.1,AT4G05240.1,AT4G05260.1,AT4G05250.1,AT4G05230.1,AT4G02950.1 Poptr1|713574  
AT4G05270.1,AT4G02970.1,AT4G03360.1,AT4G05310.1  
AT4G03350.1  
AT1G31190.1 Poptr1|586756  
Poptr1|575607,Poptr1|575605,Poptr1|575608  
AT5G58970.1 Poptr1|691364  
AT5G19760.1 Poptr1|547596,Poptr1|684718  
AT2G22500.1 Poptr1|75548,Poptr1|583335,Poptr1|668325,Poptr1|711109,Poptr1|716414,Poptr1|577345  
AT3G54110.1 Poptr1|560866,Poptr1|576911  
AT1G14140.1 Poptr1|698398  
AT5G01340.1 Poptr1|577001  
AT4G03115.1 Poptr1|572760,Poptr1|572764  
AT5G09470.1  
AT4G24570.1  
Poptr1|577322,Poptr1|577323  
AT3G02870.1 Poptr1|716898  
Poptr1|579083  
Poptr1|586943  
AT1G60060.1 Poptr1|726712  
Poptr1|591997  
AT4G29160.1 Poptr1|561117  
AT2G19830.1  
Poptr1|672465  
AT5G04850.1,AT3G10640.1 Poptr1|686557,Poptr1|698783  
AT1G27390.1 Poptr1|707016,Poptr1|640016,Poptr1|684782  
AT5G40930.1  
AT3G27070.1,AT3G27080.1  
AT2G26260.1,AT1G47290.2 Poptr1|653788  
AT2G43420.1 Poptr1|562212  
AT5G13720.1 Poptr1|650015  
AT4G19390.1 Poptr1|742660  
Poptr1|591852  
AT3G59770.1 Poptr1|672286  
Poptr1|574414,Poptr1|580414,Poptr1|590929  
Poptr1|672285  
Poptr1|672287  
Poptr1|745009  
AT2G17036.1,AT2G17030.1 Poptr1|649176,Poptr1|556686  
AT5G24040.1

AT5G60060.1  
Poptr1|346621  
Poptr1|549413  
AT5G50460.1,AT4G24920.1 Poptr1|356061,Poptr1|666678  
AT3G48570.1  
Poptr1|60141  
AT4G22970.1 Poptr1|553459  
Poptr1|553457  
Poptr1|553458  
ATCG00740.1 Poptr1|577349  
AT4G04080.1,AT4G22220.1 Poptr1|575170,Poptr1|570099  
AT3G01020.1  
AT5G08560.1 Poptr1|559520,Poptr1|551205  
AT5G43920.1  
Poptr1|551204  
Poptr1|353100  
AT4G29480.1,AT4G26210.1,AT2G19680.1 Poptr1|683081,Poptr1|341790  
Poptr1|577930  
AT3G54540.1 Poptr1|353106  
AT1G64550.1 Poptr1|683644  
AT5G64840.1 Poptr1|718920,Poptr1|71732  
AT5G60790.1 Poptr1|584435,Poptr1|697746  
AT5G09930.1  
Poptr1|560134,Poptr1|725221  
Poptr1|673851  
Poptr1|584964,Poptr1|107732  
AT3G24800.1 Poptr1|692083,Poptr1|554844  
AT2G46290.1,AT2G46280.1 Poptr1|686276,Poptr1|698138  
AT2G05990.1 Poptr1|576267,Poptr1|639726,Poptr1|684702  
Poptr1|680636  
AT4G21670.1 Poptr1|555554,Poptr1|743771  
AT1G61850.1 Poptr1|694066,Poptr1|102312  
ATCG00820.1 Poptr1|108246,Poptr1|748250,Poptr1|678797,Poptr1|585976,Poptr1|62549,Poptr1|62620  
Poptr1|590901  
AT5G57150.1 Poptr1|579024,Poptr1|560660,Poptr1|702341  
AT4G29930.1  
Poptr1|351666,Poptr1|351663,Poptr1|669834,Poptr1|351665  
Poptr1|351667  
AT3G43720.1,AT2G27130.1 Poptr1|649003,Poptr1|679864  
AT5G64080.1 Poptr1|712157,Poptr1|640777  
AT4G14815.1,AT3G22600.1 Poptr1|690631,Poptr1|651785,Poptr1|692849,Poptr1|658506,Poptr1|692851  
AT2G48140.1 Poptr1|559579  
AT5G13900.1 Poptr1|582710  
AT2G13820.1  
AT4G08670.1,AT1G36150.1  
AT5G09370.1  
AT3G22580.1  
AT2G48130.1  
Poptr1|643728,Poptr1|651320  
Poptr1|643279  
AT1G48540.1,AT3G17920.1 Poptr1|666322,Poptr1|569720  
Poptr1|666320  
Poptr1|666321  
AT2G22310.1,AT4G39910.1 Poptr1|71633,Poptr1|718773  
AT1G20580.1 Poptr1|652209,Poptr1|550771  
AT1G76300.1  
AT2G20580.1 Poptr1|695743,Poptr1|594639  
AT4G28470.1  
AT4G08140.1  
AT3G07670.1 Poptr1|573120  
AT4G19860.1 Poptr1|678271,Poptr1|746941  
AT3G03310.1 Poptr1|686428  
Poptr1|593685  
Poptr1|666851  
AT2G32160.2,AT2G32170.1 Poptr1|734605,Poptr1|592439,Poptr1|652471  
Poptr1|591288  
Poptr1|734598  
Poptr1|680997  
ATCG00900.1,ATCG01240.1 Poptr1|674195,Poptr1|670499,Poptr1|672352  
Poptr1|568400  
Poptr1|60995  
Poptr1|97523  
Poptr1|671969  
Poptr1|580117  
Poptr1|672054  
AT2G24270.1 Poptr1|578767,Poptr1|717030  
Poptr1|58591  
AT5G53980.1 Poptr1|568845,Poptr1|98386  
AT2G22430.1,AT4G40060.1 Poptr1|562555  
AT1G69780.1,AT1G26960.1 Poptr1|696444,Poptr1|687113  
AT3G01220.1,AT5G15150.1 Poptr1|736296  
AT2G46680.1,AT3G61890.1 Poptr1|731421,Poptr1|348135

AT4G36740.1,AT2G18550.1 Poptr1|655260,Poptr1|703426  
AT5G65310.1  
AT5G66700.1  
Poptr1|594622  
Poptr1|715838  
Poptr1|716449,Poptr1|551610  
Poptr1|343725,Poptr1|548258  
Poptr1|569633  
AT1G53850.1,AT3G14290.1 Poptr1|553824,Poptr1|745887  
Poptr1|577903  
AT1G20330.1 Poptr1|710962,Poptr1|559888  
AT1G76090.1  
AT5G13710.1 Poptr1|722830,Poptr1|683852  
Poptr1|560499,Poptr1|576358  
Poptr1|582678  
AT5G20040.1 Poptr1|642383  
AT1G18090.1 Poptr1|574972  
AT1G29630.1 Poptr1|568479  
AT2G02550.1  
AT3G06290.1 Poptr1|565684  
AT3G54380.1 Poptr1|62829  
AT1G60170.1 Poptr1|552316,Poptr1|731413  
AT1G70400.2  
Poptr1|574452  
Poptr1|571940  
AT1G52870.2 Poptr1|670117,Poptr1|726950  
Poptr1|580371  
Poptr1|571769  
AT3G27840.1,AT3G27850.1,AT3G27830.1 Poptr1|706755  
AT2G26850.1,AT2G32560.1 Poptr1|701315,Poptr1|557709,Poptr1|706513  
AT2G41170.1  
Poptr1|716944  
AT3G46100.1 Poptr1|589474  
AT5G03406.1  
AT5G61790.1,AT5G07340.1 Poptr1|699330,Poptr1|733818  
Poptr1|548134  
AT4G00440.1 Poptr1|572258,Poptr1|552173  
AT3G61380.1,AT2G45900.1  
Poptr1|548457  
AT5G47770.1,AT4G17190.1 Poptr1|560081  
Poptr1|671980  
Poptr1|671981  
AT5G28640.1 Poptr1|586807,Poptr1|571071  
AT2G40030.1 Poptr1|555044,Poptr1|48505  
AT1G63020.1 Poptr1|63613  
AT1G09330.1 Poptr1|570691,Poptr1|744441  
Poptr1|572573  
AT5G42810.1 Poptr1|692931,Poptr1|685407  
AT1G58936.1,AT1G22100.1,AT1G58643.1,AT1G59312.1  
AT1G59171.1  
AT3G53980.1 Poptr1|576862  
AT2G37870.1 Poptr1|657041,Poptr1|566380  
AT5G05960.1 Poptr1|656164  
Poptr1|560837  
AT1G30360.1 Poptr1|550129  
AT1G10090.1,AT1G58520.1 Poptr1|692571  
AT3G54510.1 Poptr1|555011  
AT3G21620.1 Poptr1|343022  
AT1G32090.1 Poptr1|349959,Poptr1|689506  
AT3G01100.1 Poptr1|712840  
AT4G04340.1,AT4G22120.1 Poptr1|747904,Poptr1|584709,Poptr1|690468,Poptr1|687468  
AT4G15430.1  
AT1G62320.1  
AT4G02900.1  
AT1G11960.1  
Poptr1|687256,Poptr1|696698  
AT2G45740.1 Poptr1|572179,Poptr1|552115  
AT1G01820.1  
AT3G61070.1  
Poptr1|721731  
AT2G42910.1 Poptr1|693083,Poptr1|651671  
AT1G10700.1 Poptr1|697982  
AT5G11890.1 Poptr1|736897,Poptr1|561659  
AT1G17620.1 Poptr1|593108,Poptr1|592766,Poptr1|597627  
AT4G11560.1 Poptr1|554369,Poptr1|548465  
AT2G25120.1,AT4G23120.1,AT3G43990.1  
Poptr1|554368  
Poptr1|554367  
Poptr1|63541  
AT3G58750.1,AT2G42790.1 Poptr1|572841,Poptr1|735489  
AT3G58740.1  
AT3G17609.2 Poptr1|657788

AT5G11260.1 Poptr1|58550,Poptr1|561872  
AT3G29240.1 Poptr1|556354  
AT1G33780.1 Poptr1|738747  
AT2G30580.1,AT1G06770.1 Poptr1|559646,Poptr1|692877  
Poptr1|595416,Poptr1|595414  
Poptr1|354548  
Poptr1|592256  
AT3G27870.1 Poptr1|64760  
AT5G04930.1 Poptr1|697016,Poptr1|725358,Poptr1|353204  
AT5G44240.1 Poptr1|741584  
AT3G13900.1,AT1G54280.1,AT1G17500.1,AT1G72700.1 Poptr1|592804,Poptr1|597669  
AT3G25610.1,AT1G13210.1,AT1G26130.1,AT1G68710.1 Poptr1|569838  
AT3G18700.1  
Poptr1|560995,Poptr1|577193  
Poptr1|75315  
Poptr1|553529  
Poptr1|577554,Poptr1|579214  
Poptr1|63327  
Poptr1|645785  
Poptr1|596497  
Poptr1|566702,Poptr1|720837  
AT3G62840.1,AT2G47640.1 Poptr1|572691,Poptr1|709823  
Poptr1|591793  
AT5G19740.1 Poptr1|352104  
AT4G07670.1  
AT1G79210.1,AT1G16470.1 Poptr1|699235,Poptr1|682977  
Poptr1|570631  
Poptr1|677481  
AT5G05660.1 Poptr1|567269  
AT1G10170.1 Poptr1|97020,Poptr1|355085  
Poptr1|564024  
AT4G17150.1 Poptr1|652311,Poptr1|672024  
AT1G32470.1,AT2G35370.1 Poptr1|580100,Poptr1|676524  
AT3G57200.1 Poptr1|351465,Poptr1|688696  
AT3G08550.1 Poptr1|554991,Poptr1|547860  
AT2G41450.1  
AT2G27680.1 Poptr1|649116  
Poptr1|594812  
AT1G75440.1 Poptr1|683264,Poptr1|563219  
AT5G42990.1,AT1G45050.1  
AT4G36410.1  
AT5G45390.1 Poptr1|554124,Poptr1|346298  
AT1G12410.1 Poptr1|690132  
AT1G02560.1 Poptr1|692259  
AT4G17040.1 Poptr1|580163  
AT1G66670.1 Poptr1|714111  
AT1G11750.1 Poptr1|697290,Poptr1|712936  
AT5G23140.1 Poptr1|650895,Poptr1|562818  
ATCG00670.1  
Poptr1|731676  
Poptr1|678327  
AT4G10790.1 Poptr1|548279,Poptr1|554543  
Poptr1|575201  
AT4G20970.1 Poptr1|96843,Poptr1|545292,Poptr1|580914,Poptr1|98216,Poptr1|96844  
Poptr1|700919,Poptr1|355871  
AT5G56360.1 Poptr1|62669,Poptr1|555175  
AT2G42390.1 Poptr1|672328  
Poptr1|571230  
AT2G26695.1 Poptr1|60761,Poptr1|685684  
AT5G25490.1 Poptr1|712480,Poptr1|691199,Poptr1|669032,Poptr1|561867  
AT3G15680.1  
AT2G43180.1 Poptr1|710330  
AT1G21440.1,AT1G77060.1 Poptr1|551374  
Poptr1|596296  
AT5G57850.1 Poptr1|668923  
Poptr1|687591  
Poptr1|561775  
AT3G02040.1 Poptr1|548064,Poptr1|549748  
AT5G41080.1  
AT5G43300.1  
AT4G00840.1 Poptr1|572449  
AT1G22170.1,AT1G78050.1 Poptr1|71665,Poptr1|551549,Poptr1|559135  
AT4G37110.1 Poptr1|76190  
AT2G23530.1  
Poptr1|687729  
AT1G31812.1 Poptr1|739977,Poptr1|646371  
Poptr1|674050  
AT1G80070.1 Poptr1|740880  
AT4G38780.1  
Poptr1|597610  
Poptr1|569365  
AT5G64270.1 Poptr1|577374

Poptr1|707264  
AT2G32480.1,AT1G05140.1 Poptr1|572966,Poptr1|343032  
AT2G07675.1,ATMG00980.1 Poptr1|593311  
ATCG01230.1,ATCG00905.1,ATCG00065.1  
AT3G25410.1 Poptr1|573210  
AT4G12030.2,AT4G22840.1 Poptr1|350129  
Poptr1|587171,Poptr1|63651  
AT2G41050.1 Poptr1|351306,Poptr1|576048  
AT4G36850.1 Poptr1|53346  
AT4G20100.1  
Poptr1|106475  
AT3G06170.1 Poptr1|354925  
AT1G16180.1 Poptr1|547725,Poptr1|555149  
AT1G48030.1,AT3G17240.1 Poptr1|686374  
Poptr1|698344  
Poptr1|588898  
AT3G08850.1 Poptr1|351970,Poptr1|701666  
AT5G01770.1  
AT3G09200.1,AT3G11250.1 Poptr1|656219,Poptr1|698514  
AT2G40010.1  
AT1G29330.1 Poptr1|55877  
AT3G25040.1 Poptr1|641922,Poptr1|577431  
AT3G58170.1 Poptr1|651871,Poptr1|643179  
AT4G14455.1 Poptr1|566117  
AT3G05675.1 Poptr1|561152  
Poptr1|548282  
Poptr1|576499  
AT2G30200.1 Poptr1|722565  
Poptr1|49121  
AT1G63220.1 Poptr1|552132  
AT1G12100.1 Poptr1|671231  
AT1G62500.1 Poptr1|646444  
AT1G62510.1 Poptr1|554199,Poptr1|690153,Poptr1|346174  
AT4G12530.1  
AT5G46900.1,AT2G45180.1,AT5G46890.1  
AT4G12520.1,AT4G12510.1  
AT4G12470.1,AT4G12500.1,AT4G12490.1,AT4G12480.1  
AT4G22460.1  
AT1G12090.1  
AT4G12550.1,AT4G12545.1  
AT4G00165.1  
AT4G22490.1  
AT1G22882.1,AT1G71360.1 Poptr1|743872  
Poptr1|554505,Poptr1|63409  
Poptr1|584914  
AT2G46150.1 Poptr1|552221  
AT1G64065.1  
AT2G44000.1  
Poptr1|554425,Poptr1|48710  
Poptr1|572317  
AT1G66860.1,AT5G38200.1 Poptr1|553067,Poptr1|566575  
AT1G15040.1  
Poptr1|105537  
Poptr1|589621  
AT5G16660.1,AT3G02900.1 Poptr1|702464,Poptr1|571412  
AT1G42960.1 Poptr1|719161  
Poptr1|694914  
AT3G07660.1 Poptr1|348514  
Poptr1|664908  
Poptr1|568453,Poptr1|691845  
AT1G54370.1,AT1G79610.1 Poptr1|582347  
AT1G68490.1 Poptr1|670909,Poptr1|566618  
AT5G16110.1  
AT1G13390.1  
Poptr1|574899,Poptr1|355571  
AT3G62130.1 Poptr1|348434,Poptr1|572528  
AT5G26600.1 Poptr1|570656,Poptr1|581602  
AT1G07010.1 Poptr1|557612  
Poptr1|64706  
AT5G16370.1,AT5G16340.1,AT1G75960.1  
Poptr1|571619,Poptr1|671065,Poptr1|575865,Poptr1|581020,Poptr1|746229  
AT3G16910.1 Poptr1|564415  
AT1G68270.1,AT1G66120.1,AT1G65880.1,AT1G65890.1  
Poptr1|560363,Poptr1|556023,Poptr1|592805,Poptr1|717412,Poptr1|552859,Poptr1|701306  
AT1G20560.1 Poptr1|73149  
AT1G21530.1,AT1G21540.1,AT1G77240.1  
AT1G76290.1  
AT2G17650.1  
Poptr1|571605,Poptr1|571620  
Poptr1|582662,Poptr1|592954  
Poptr1|587666  
Poptr1|560365,Poptr1|645154



Poptr1|552855  
Poptr1|342119  
Poptr1|587464  
Poptr1|71909,Poptr1|595311  
Poptr1|584333  
AT5G02040.1 Poptr1|685730  
AT5G05987.1  
Poptr1|576841  
AT1G28490.2 Poptr1|674303,Poptr1|693959  
AT3G09740.1 Poptr1|576674,Poptr1|589417  
AT3G45280.1  
AT3G61450.1  
Poptr1|731145  
Poptr1|675004  
AT1G79040.1 Poptr1|569170,Poptr1|746726,Poptr1|586877  
Poptr1|661166  
AT1G42470.1 Poptr1|721264  
AT4G38350.1 Poptr1|694907  
AT5G66550.1 Poptr1|76297  
AT5G42770.1  
AT2G17200.1,AT2G17190.1 Poptr1|685209,Poptr1|54254,Poptr1|703572  
AT3G18680.2 Poptr1|595385  
Poptr1|562424  
AT4G17790.1 Poptr1|554031,Poptr1|590030  
AT1G71940.1 Poptr1|689295  
AT4G09580.1  
AT3G09920.1 Poptr1|689403  
AT3G56960.1,AT2G41210.1 Poptr1|57925  
AT1G01460.1,AT2G26420.1,AT1G60890.1,AT1G21980.1,AT1G10900.1,AT3G07960.1,AT1G77740.1,AT4G01190.1  
Poptr1|547812,Poptr1|559188,Poptr1|572338,Poptr1|573531,Poptr1|684497,Poptr1|350878,Poptr1|54874  
7,Poptr1|582189,Poptr1|573532  
Poptr1|579944  
Poptr1|572339  
Poptr1|579946  
Poptr1|712242  
Poptr1|556576  
AT2G02370.1 Poptr1|708950  
AT4G12000.1,AT4G22850.1 Poptr1|691183,Poptr1|712590  
AT1G12450.1  
Poptr1|675658  
AT5G05920.1 Poptr1|684730  
Poptr1|639751  
Poptr1|676237  
AT5G62050.1 Poptr1|560645,Poptr1|63427  
AT2G46455.1,AT2G46470.1  
AT1G44890.1  
AT4G36820.1,AT2G23790.1 Poptr1|357017,Poptr1|53350  
AT5G42610.1 Poptr1|551919,Poptr1|591835  
AT5G66650.1  
AT1G57610.1,AT1G09575.1 Poptr1|571949,Poptr1|574447  
AT2G35680.1 Poptr1|739994,Poptr1|693628  
Poptr1|342643,Poptr1|677701  
AT2G41250.1 Poptr1|701322  
Poptr1|717512  
AT1G78770.1 Poptr1|585761,Poptr1|568795  
Poptr1|585764,Poptr1|595357,Poptr1|595359  
Poptr1|585763,Poptr1|595358  
AT2G26070.1 Poptr1|577940,Poptr1|341785  
AT3G51040.1 Poptr1|563226  
Poptr1|596348  
AT4G18550.1 Poptr1|568737,Poptr1|685115  
AT2G44810.1 Poptr1|342648,Poptr1|677679  
AT1G51440.1 Poptr1|650067  
AT2G30550.2,AT1G06800.1 Poptr1|559641,Poptr1|342267  
AT1G30370.1 Poptr1|557811,Poptr1|64523  
AT4G16820.1 Poptr1|589902,Poptr1|553922  
AT1G05800.1,AT2G31690.1 Poptr1|348665,Poptr1|664702  
AT2G42690.1 Poptr1|349980  
AT1G06250.1  
Poptr1|713858  
Poptr1|580576,Poptr1|580577,Poptr1|579060  
Poptr1|591773  
Poptr1|549623  
Poptr1|648369  
Poptr1|106352  
AT3G26060.1 Poptr1|589333,Poptr1|736741  
AT1G73030.1,AT1G17730.1 Poptr1|712050,Poptr1|691317  
Poptr1|548967  
AT1G66130.1 Poptr1|559453,Poptr1|714860,Poptr1|552873  
AT4G09670.1  
AT1G34200.1  
AT4G13450.1 Poptr1|54984

AT1G69080.1 Poptr1|60513,Poptr1|55316,Poptr1|564425  
AT3G03290.1,AT5G17390.1  
AT2G03720.1  
Poptr1|565004  
AT3G44940.1,AT5G22930.1 Poptr1|558314,Poptr1|61006  
AT2G28140.1  
Poptr1|567678,Poptr1|353328  
AT1G54390.2 Poptr1|573914,Poptr1|571214  
AT3G24010.1 Poptr1|711962  
Poptr1|592950  
AT1G11190.1 Poptr1|55771  
AT4G21585.1,AT4G21600.1,AT4G21590.1 Poptr1|698888  
AT2G19930.1,AT2G19910.1,AT2G19920.1 Poptr1|562705,Poptr1|562707  
Poptr1|591179  
Poptr1|587377  
Poptr1|584507  
AT4G24660.1 Poptr1|643840,Poptr1|559031  
AT2G18350.1 Poptr1|719528,Poptr1|593930,Poptr1|551009,Poptr1|559731  
AT5G39760.1,AT3G28920.1 Poptr1|545934,Poptr1|58385  
AT3G28917.1 Poptr1|736317,Poptr1|556359  
AT5G65410.1  
AT3G50890.1  
AT1G75240.1  
AT5G60480.1,AT1G69600.1  
AT5G15210.1  
AT1G74660.1  
Poptr1|592275,Poptr1|738823  
Poptr1|569389  
Poptr1|353837,Poptr1|659311  
Poptr1|580638  
AT1G52855.1 Poptr1|580362,Poptr1|580361,Poptr1|568957,Poptr1|677456,Poptr1|579522,Poptr1|582107  
AT2G20835.1  
Poptr1|663522  
AT3G12570.1 Poptr1|588737,Poptr1|656079  
AT2G37570.1  
AT5G02480.1  
AT2G46080.1 Poptr1|552200,Poptr1|108787,Poptr1|572298  
AT1G01550.1  
AT4G01360.1  
AT3G61500.1  
AT4G04770.1 Poptr1|546348  
AT5G44316.1  
Poptr1|568003  
AT2G20190.1 Poptr1|692025  
AT3G56160.1 Poptr1|353260  
Poptr1|587247  
AT3G20290.1 Poptr1|568172  
AT4G05520.1  
Poptr1|691790  
Poptr1|584742  
AT1G68200.1,AT1G66810.1 Poptr1|108407,Poptr1|105162,Poptr1|582882,Poptr1|584936  
Poptr1|658834  
AT2G27040.1 Poptr1|57888,Poptr1|560288,Poptr1|683794,Poptr1|344827  
AT2G27880.1 Poptr1|697765,Poptr1|709670  
AT5G43810.1 Poptr1|564892  
AT2G32940.1 Poptr1|732333  
AT1G31290.1 Poptr1|586740  
AT5G21030.1,AT5G21150.1  
AT1G48410.2  
AT1G31280.1  
Poptr1|576054  
Poptr1|584120  
Poptr1|589537  
Poptr1|726473  
Poptr1|106093  
AT5G28220.1,AT3G04830.1 Poptr1|683284,Poptr1|662899  
Poptr1|597175,Poptr1|680158  
Poptr1|587972  
Poptr1|681403  
AT3G04300.1 Poptr1|692016  
AT4G10300.1  
AT4G10280.1  
AT4G28703.1  
AT3G11780.1,AT5G06480.1 Poptr1|653399,Poptr1|701437  
AT3G44100.1  
AT2G16005.1  
AT5G12010.1 Poptr1|653855,Poptr1|587961  
AT4G29780.1 Poptr1|674866,Poptr1|73072  
AT1G49400.1,AT3G18880.1 Poptr1|690451,Poptr1|685763  
Poptr1|573183  
AT5G62910.1,AT3G48070.2 Poptr1|687785,Poptr1|666395  
AT1G74870.1

AT2G32260.1 Poptr1|685877,Poptr1|688652  
AT4G15130.1 Poptr1|589847,Poptr1|349716  
AT1G05270.1 Poptr1|594455,Poptr1|75470  
AT2G32340.1 Poptr1|562305  
AT4G22260.1 Poptr1|584739  
Poptr1|727508  
AT1G17820.1,AT1G73200.1 Poptr1|585895,Poptr1|99198  
Poptr1|591177  
AT4G19150.1 Poptr1|343520,Poptr1|590121  
AT2G03430.1 Poptr1|659236  
AT2G26310.1 Poptr1|344585,Poptr1|578011  
AT3G63170.1 Poptr1|643300  
AT5G43260.1 Poptr1|747848,Poptr1|548029,Poptr1|554780  
AT1G44446.1 Poptr1|716666  
Poptr1|684509  
Poptr1|347248  
AT3G10820.1,AT5G05140.1 Poptr1|576137,Poptr1|701304,Poptr1|560356  
Poptr1|351384  
AT1G68730.1 Poptr1|658969  
AT5G27280.1 Poptr1|652153,Poptr1|642887  
AT1G27970.1 Poptr1|554771,Poptr1|548036  
AT1G27310.1 Poptr1|568204  
AT1G80300.1,AT1G15500.1 Poptr1|693719,Poptr1|548631  
AT4G05420.1 Poptr1|65412  
AT4G21100.1 Poptr1|568569  
AT3G22970.1 Poptr1|559623,Poptr1|720965,Poptr1|726454  
AT4G32480.1,AT2G20670.1 Poptr1|693941,Poptr1|704182,Poptr1|96842,Poptr1|582726  
AT2G39650.1 Poptr1|724700,Poptr1|696856  
AT1G77145.1,AT1G77160.1 Poptr1|654611,Poptr1|595380,Poptr1|551351,Poptr1|559338  
AT1G62420.1,AT1G12030.1 Poptr1|99373,Poptr1|568182  
AT2G38820.2  
AT4G14620.1  
AT3G54550.1  
Poptr1|684590  
Poptr1|574188,Poptr1|703242  
AT5G51660.1 Poptr1|699557  
Poptr1|574680  
Poptr1|574679  
AT2G42450.1 Poptr1|694750  
Poptr1|346865  
AT5G08280.1 Poptr1|71794,Poptr1|75944  
AT1G48430.1,AT3G17770.1 Poptr1|687677,Poptr1|96997  
Poptr1|591515  
AT4G20330.1 Poptr1|640520  
AT4G21010.1  
Poptr1|554331  
Poptr1|577433,Poptr1|582401  
AT3G56190.1 Poptr1|564097,Poptr1|687297  
AT3G56450.1  
Poptr1|668145  
AT4G34450.1 Poptr1|694156,Poptr1|697279  
AT2G16200.1  
AT1G28520.1 Poptr1|586063,Poptr1|545240  
Poptr1|582790,Poptr1|574371  
AT3G49780.1 Poptr1|563339,Poptr1|663692  
AT4G37720.1,AT2G22860.1  
AT5G65870.1  
Poptr1|572016,Poptr1|709855  
AT5G19580.1,AT1G67290.1 Poptr1|584045  
AT3G57620.1 Poptr1|595476,Poptr1|570966  
AT1G75620.1,AT1G19900.1 Poptr1|73002,Poptr1|550930  
AT3G53950.1 Poptr1|667914  
AT1G14430.1 Poptr1|565430  
Poptr1|709024  
AT3G08600.1 Poptr1|577225,Poptr1|589610  
AT4G23720.1 Poptr1|554446,Poptr1|63466,Poptr1|572346  
AT4G01140.1  
Poptr1|552241  
AT1G09830.1 Poptr1|596749  
Poptr1|103794,Poptr1|673329  
AT1G79230.1 Poptr1|686035,Poptr1|71832  
AT1G16460.2  
ATMG00665.1,ATMG00060.1,ATMG00513.1 Poptr1|591298  
Poptr1|580229  
Poptr1|677425,Poptr1|591284  
Poptr1|579068  
Poptr1|680715  
AT4G13940.1,AT3G23810.1 Poptr1|597072,Poptr1|549785

Poptr1|108722  
Poptr1|108698  
AT4G09830.1 Poptr1|551292,Poptr1|559416  
AT5G64780.1  
Poptr1|62682  
AT4G33400.1 Poptr1|551857,Poptr1|591944  
AT3G19240.1 Poptr1|649556  
Poptr1|744281  
AT3G05500.1 Poptr1|570793,Poptr1|744528  
AT1G67360.1 Poptr1|712615,Poptr1|548015  
Poptr1|579572  
Poptr1|348233  
AT2G42200.1,AT3G57920.1 Poptr1|576281  
AT2G33810.1 Poptr1|743830  
AT1G27370.1,AT5G43270.1,AT1G27360.1 Poptr1|584539  
AT5G50570.1,AT5G50670.1 Poptr1|733658,Poptr1|699365  
AT1G02065.1 Poptr1|347807  
Poptr1|574181  
Poptr1|647067,Poptr1|640026  
Poptr1|640056,Poptr1|712454  
Poptr1|740112  
AT1G28260.1 Poptr1|555784,Poptr1|580918  
AT5G19400.1 Poptr1|706531,Poptr1|560381  
AT2G25660.1 Poptr1|578137  
Poptr1|668969  
Poptr1|668970  
Poptr1|668971  
Poptr1|654064  
Poptr1|352848  
Poptr1|578138  
AT1G18720.1,AT1G74440.1 Poptr1|696708  
Poptr1|108896  
Poptr1|587598  
AT2G31600.1,AT3G53860.1,AT1G05860.1 Poptr1|75427,Poptr1|580300,Poptr1|594485  
Poptr1|567175  
AT4G03560.1 Poptr1|744967  
AT5G08550.1 Poptr1|353099  
AT5G09210.1  
Poptr1|351266,Poptr1|108015,Poptr1|351265,Poptr1|107639  
Poptr1|104191,Poptr1|350514  
AT1G26665.1,AT5G41910.1 Poptr1|681773,Poptr1|682041  
Poptr1|588058,Poptr1|587316  
Poptr1|675302,Poptr1|586612  
Poptr1|675301  
AT5G53480.1 Poptr1|687711  
Poptr1|732844  
Poptr1|560941,Poptr1|735924  
AT4G04640.1 Poptr1|555320  
AT1G15700.1  
Poptr1|727438,Poptr1|55743  
AT1G02880.3,AT2G44750.2 Poptr1|572707,Poptr1|684287  
AT1G19640.1 Poptr1|52171  
AT5G55250.1 Poptr1|65424  
AT4G36470.1 Poptr1|53396  
AT3G11480.1,AT5G66430.1,AT2G14060.1,AT5G04380.1,AT5G38020.1,AT5G04370.2  
Poptr1|58862,Poptr1|563193,Poptr1|573758  
AT5G56300.1  
AT3G21950.1  
Poptr1|573753  
Poptr1|593547,Poptr1|573754  
Poptr1|573110  
Poptr1|593443  
Poptr1|580175  
AT5G14660.1 Poptr1|64789  
Poptr1|680957  
AT2G48110.1 Poptr1|572803,Poptr1|552662,Poptr1|354923  
AT3G23590.1  
Poptr1|734409  
AT2G46260.1,AT3G61600.1 Poptr1|348041,Poptr1|700265  
AT4G01160.1  
Poptr1|709218,Poptr1|554445  
AT1G19920.1 Poptr1|685430,Poptr1|342176  
AT4G14680.1,AT3G22890.1 Poptr1|686235,Poptr1|658460  
AT5G43780.1  
AT3G50820.1,AT5G66570.1 Poptr1|719397,Poptr1|685218  
AT4G37230.1  
AT1G56230.1 Poptr1|699712  
AT3G09100.2,AT5G01290.1 Poptr1|351872  
AT5G28210.1  
Poptr1|735714  
Poptr1|667975  
AT5G20610.1 Poptr1|561025

AT5G26160.1  
Poptr1|561618  
AT5G05010.1 Poptr1|701114,Poptr1|570607  
Poptr1|105642  
AT3G59280.1 Poptr1|572941  
Poptr1|57711,Poptr1|687839  
Poptr1|552815,Poptr1|552812  
AT2G16730.1,AT4G35010.1,AT4G38590.1 Poptr1|556638,Poptr1|557081  
AT5G63800.1 Poptr1|694292  
AT3G13750.1 Poptr1|59604,Poptr1|703914  
AT2G32810.1 Poptr1|689945  
AT4G36360.1 Poptr1|719632  
AT5G20710.1 Poptr1|48511  
AT1G77410.1 Poptr1|342404  
AT2G28470.1 Poptr1|54820  
AT5G63810.1 Poptr1|53156  
AT3G53050.1  
AT1G31740.1  
AT2G04060.1  
AT3G53080.1  
Poptr1|548327  
Poptr1|352016  
Poptr1|715300  
Poptr1|694180  
Poptr1|555514  
Poptr1|589318,Poptr1|577822  
Poptr1|592311  
Poptr1|72484  
Poptr1|568285  
Poptr1|106734  
AT1G05790.1 Poptr1|552818,Poptr1|572935  
Poptr1|572937  
Poptr1|572936  
AT1G53180.1,AT3G15115.1 Poptr1|592532,Poptr1|565372,Poptr1|65548,Poptr1|65549,Poptr1|591384  
AT1G30110.1 Poptr1|686305,Poptr1|726879  
AT5G06340.1 Poptr1|576513,Poptr1|653368  
AT3G10620.1 Poptr1|686558,Poptr1|55687  
Poptr1|593674  
AT4G27700.1 Poptr1|569609,Poptr1|700773,Poptr1|700772  
AT5G47110.1,AT4G17600.1 Poptr1|702880,Poptr1|580161  
Poptr1|107090,Poptr1|575510  
AT2G31090.1 Poptr1|574349  
Poptr1|579416,Poptr1|53058,Poptr1|583065,Poptr1|568846  
Poptr1|687572  
AT4G36390.1 Poptr1|53409  
Poptr1|76362  
AT3G20760.1,AT1G51130.1 Poptr1|351071  
Poptr1|576268  
Poptr1|106714  
AT3G28210.1 Poptr1|569129  
AT2G41835.1,AT3G57480.1 Poptr1|560516  
AT5G48205.1  
AT2G18196.1 Poptr1|569245,Poptr1|642538  
AT4G39700.1 Poptr1|695902,Poptr1|71682  
AT4G08570.1 Poptr1|97565,Poptr1|651334,Poptr1|342461,Poptr1|51942  
AT1G66240.1 Poptr1|47389,Poptr1|655799  
AT4G27590.1 Poptr1|569672  
AT5G17450.1 Poptr1|692123  
AT1G22990.1,AT1G71050.1 Poptr1|687165  
AT4G38580.1 Poptr1|721689,Poptr1|648797,Poptr1|649212  
AT3G48970.1 Poptr1|575823  
AT3G56240.1  
AT5G66110.1  
AT4G35060.1  
Poptr1|351304  
Poptr1|559999  
AT2G35155.1 Poptr1|705139,Poptr1|575614  
AT5G45030.1  
AT4G40050.1 Poptr1|71605,Poptr1|53164  
AT3G03570.1 Poptr1|56759  
AT4G24820.1 Poptr1|666602,Poptr1|570209  
AT4G18480.1,AT5G45930.1 Poptr1|555713,Poptr1|699049  
AT5G38110.1,AT1G66740.1 Poptr1|711472  
Poptr1|648064  
AT5G04590.1 Poptr1|557859,Poptr1|691434  
Poptr1|104659  
AT2G38280.1 Poptr1|560928,Poptr1|688838  
Poptr1|345637  
Poptr1|355044  
AT1G12360.1 Poptr1|704232,Poptr1|712321  
AT4G12120.1  
Poptr1|572105

AT4G34215.1 Poptr1|65225  
Poptr1|703152  
Poptr1|649618  
Poptr1|740504  
AT4G02260.1 Poptr1|572668  
Poptr1|571027  
Poptr1|587631,Poptr1|550362,Poptr1|587641  
Poptr1|677454  
AT2G16850.1,AT4G35100.1 Poptr1|648808  
AT2G45960.1,AT4G23400.1,AT4G00430.1,AT3G61430.1,AT1G01620.1 Poptr1|701598,Poptr1|682262  
AT2G37170.1,AT2G37180.1,AT3G53420.1  
Poptr1|723536,Poptr1|563742,Poptr1|735494,Poptr1|567607,Poptr1|739464  
AT3G54820.1  
AT5G60660.1  
AT2G39010.1  
Poptr1|593805  
Poptr1|356845  
Poptr1|721668  
Poptr1|677352,Poptr1|711735,Poptr1|557139,Poptr1|546173,Poptr1|579650  
Poptr1|687327,Poptr1|656216  
Poptr1|560889  
AT1G35680.1 Poptr1|683154,Poptr1|592237  
AT4G30930.1 Poptr1|575353  
AT5G11880.1,AT3G14390.1 Poptr1|556492,Poptr1|557223  
Poptr1|587609  
AT1G33230.1,AT4G10430.1 Poptr1|699192,Poptr1|708011  
AT5G04040.1 Poptr1|576214,Poptr1|351450  
AT3G57140.1  
AT1G72040.1 Poptr1|574262,Poptr1|593394  
Poptr1|592271  
AT1G51310.1 Poptr1|549254  
Poptr1|557848  
AT2G34770.1 Poptr1|582602,Poptr1|550596  
AT4G20870.1  
AT1G76250.1 Poptr1|559929,Poptr1|550785  
Poptr1|553964,Poptr1|592097  
Poptr1|570495  
AT2G38940.1 Poptr1|559686,Poptr1|559687  
AT2G32830.1 Poptr1|658370,Poptr1|641904  
AT1G76430.1,AT1G20860.1 Poptr1|550732,Poptr1|73199  
AT3G54700.1  
AT5G43350.1,AT5G43370.1,AT5G43360.1  
Poptr1|586600,Poptr1|101325  
Poptr1|588955  
Poptr1|342244  
Poptr1|561001  
Poptr1|579921  
Poptr1|559688  
Poptr1|585992  
Poptr1|675756  
Poptr1|651389  
AT5G15070.1,AT3G01310.1 Poptr1|736216  
Poptr1|694093  
AT5G65840.1 Poptr1|571999  
Poptr1|655530  
AT3G17210.1 Poptr1|565393,Poptr1|657714  
Poptr1|566883,Poptr1|566884  
Poptr1|687234,Poptr1|566885,Poptr1|723971  
Poptr1|687235  
AT2G44270.1 Poptr1|71720  
AT1G76170.1  
Poptr1|562694  
Poptr1|589710  
AT5G11040.1 Poptr1|654198,Poptr1|669117  
Poptr1|654200,Poptr1|669119  
Poptr1|669120,Poptr1|654201  
Poptr1|654199  
Poptr1|669118  
AT5G66680.1 Poptr1|655250,Poptr1|703430  
Poptr1|571850,Poptr1|584054,Poptr1|556496,Poptr1|593259  
Poptr1|557286  
Poptr1|573517  
AT3G54640.1 Poptr1|651840,Poptr1|643222  
AT4G02610.1  
AT3G52420.1  
Poptr1|643327,Poptr1|548780,Poptr1|552979,Poptr1|565518,Poptr1|677301,Poptr1|651735,Poptr1|58192  
1,Poptr1|76230  
AT5G08610.1,AT5G08620.1,AT5G63630.1 Poptr1|572384,Poptr1|692362  
AT1G77050.1 Poptr1|694598  
AT3G19760.1 Poptr1|695977,Poptr1|558706  
AT5G62190.1 Poptr1|575720,Poptr1|356338  
AT4G09730.1 Poptr1|52051

AT2G33730.1 Poptr1|575020  
 AT1G63250.1,AT2G07750.1 Poptr1|691147,Poptr1|554333  
 AT3G09720.1 Poptr1|581044  
 AT1G20920.1 Poptr1|715705,Poptr1|550718  
 AT3G06980.1 Poptr1|725594  
 AT1G54270.1 Poptr1|577856,Poptr1|685066,Poptr1|561633,Poptr1|597666  
 AT4G34910.1 Poptr1|563188  
 AT1G55150.1 Poptr1|689651  
 AT5G05450.1 Poptr1|353725  
 AT3G18600.1 Poptr1|64274,Poptr1|723070  
 AT5G54910.1 Poptr1|571554  
 AT5G11200.1,AT5G11170.1 Poptr1|578196,Poptr1|654133  
 AT3G06480.1 Poptr1|566897  
 AT3G02065.3 Poptr1|731997  
 AT3G58570.1,AT3G58510.1,AT2G42520.1 Poptr1|576413,Poptr1|717593  
 AT1G31970.1 Poptr1|711852  
 AT4G00660.1 Poptr1|342744,Poptr1|731051  
 AT5G14610.1 Poptr1|64784  
 AT5G63120.2 Poptr1|700956,Poptr1|570124  
 AT5G51280.1 Poptr1|60053  
 AT1G16280.1 Poptr1|564184  
 AT2G40700.1 Poptr1|574123  
 AT3G53110.1 Poptr1|589531  
 AT5G60990.1 Poptr1|53266,Poptr1|352874  
 AT3G16840.1 Poptr1|697907  
 AT1G12770.1 Poptr1|646579  
 AT2G47330.1 Poptr1|552542  
 AT4G15850.1 Poptr1|713033  
 AT1G59990.1 Poptr1|354849  
 AT5G26742.2 Poptr1|581575  
 AT4G16630.1 Poptr1|73062  
 AT5G19210.2 Poptr1|726622  
 AT1G51380.1  
 AT3G09620.1  
 AT3G13920.2  
 AT1G72730.1  
 AT1G71280.1  
 AT1G71370.1  
 AT5G65900.1  
 AT2G45810.1,AT3G61240.1  
 AT3G01540.3  
 AT4G33370.1  
 Poptr1|670178  
 Poptr1|569725  
 Poptr1|97269,Poptr1|595184  
 Poptr1|677351  
 Poptr1|596670  
 Poptr1|567220  
 Poptr1|705647  
 Poptr1|711969,Poptr1|547630  
 Poptr1|571918  
 Poptr1|574468  
 Poptr1|106876  
 Poptr1|108751  
 Poptr1|597033  
 Poptr1|574873  
 Poptr1|571675  
 Poptr1|106780  
 Poptr1|354639  
 Poptr1|640525,Poptr1|548447,Poptr1|678765  
 Poptr1|665923  
 Poptr1|581576  
 Poptr1|704330  
 Poptr1|108108  
 Poptr1|346677  
 AT1G79600.1 Poptr1|693056  
 AT5G24970.1 Poptr1|578334  
 AT1G71810.1 Poptr1|551258  
 AT4G31390.1 Poptr1|583162  
 AT3G24190.1 Poptr1|547970  
 Poptr1|578333  
 Poptr1|551259  
 Poptr1|578388  
 Poptr1|554833  
 AT3G19190.1 Poptr1|671428,Poptr1|649547  
 Poptr1|349343,Poptr1|101309  
 Poptr1|671427,Poptr1|649546  
 Poptr1|649548,Poptr1|671430  
 AT1G77380.1  
 Poptr1|558464,Poptr1|342403,Poptr1|595125,Poptr1|674664,Poptr1|714578,Poptr1|595874,Poptr1|55142  
 0,Poptr1|559276  
 AT5G49630.1 Poptr1|710499

AT5G23810.1 Poptr1|704509,Poptr1|705508,Poptr1|642685,Poptr1|49508,Poptr1|582544,Poptr1|582548  
AT5G63850.1,AT5G09220.1  
AT1G44100.1  
AT1G10010.1,AT1G58360.1  
Poptr1|561729  
Poptr1|557088  
Poptr1|556630  
Poptr1|561728  
Poptr1|587692  
Poptr1|54556  
Poptr1|582546  
Poptr1|579398  
Poptr1|582549  
AT3G10210.1 Poptr1|560425  
AT4G35750.1 Poptr1|694886,Poptr1|550815  
Poptr1|593780  
AT5G20570.1 Poptr1|689350  
AT3G42830.1  
Poptr1|584115,Poptr1|553601  
AT5G65090.1 Poptr1|75745,Poptr1|71664  
AT4G18010.1 Poptr1|739892  
AT2G01900.1 Poptr1|354341  
AT1G71710.1 Poptr1|347083,Poptr1|559427  
AT5G04980.1 Poptr1|563490  
AT2G32010.1,AT1G05470.1 Poptr1|564861  
AT1G34120.2  
AT2G37440.1  
Poptr1|579048,Poptr1|355109,Poptr1|580633  
Poptr1|566393  
Poptr1|551147,Poptr1|52100  
Poptr1|566215  
AT1G55480.1 Poptr1|712717  
Poptr1|639609  
Poptr1|639608  
AT4G28550.1,AT2G20440.1 Poptr1|559726  
AT4G27100.1,AT5G54780.1 Poptr1|569095,Poptr1|571500  
AT2G39280.1,AT3G55020.1 Poptr1|344931,Poptr1|724864  
AT2G35800.1 Poptr1|687381,Poptr1|720749  
AT2G26360.1  
AT4G27940.1 Poptr1|705028,Poptr1|728817  
AT2G46320.1 Poptr1|348050  
AT3G02090.2 Poptr1|736441,Poptr1|648539  
AT1G49480.1,AT3G18990.1 Poptr1|581459  
Poptr1|76194,Poptr1|581457,Poptr1|596796,Poptr1|591695  
Poptr1|104824  
Poptr1|744206  
Poptr1|581458  
AT5G56220.1 Poptr1|66002  
AT4G23440.1 Poptr1|343642  
AT1G44910.1 Poptr1|572009  
Poptr1|65316  
AT5G17900.1,AT4G08580.1 Poptr1|699916,Poptr1|58926  
AT5G46280.1 Poptr1|545797  
AT2G07690.1 Poptr1|344472,Poptr1|689167  
AT5G44635.1 Poptr1|48624  
AT1G44900.1 Poptr1|708884  
AT4G02060.1 Poptr1|572618  
AT3G09660.1 Poptr1|59144  
AT2G16440.1 Poptr1|557197  
AT2G14050.1 Poptr1|573677  
Poptr1|554630  
Poptr1|663436  
Poptr1|64865  
Poptr1|663435  
Poptr1|588120  
Poptr1|576647  
Poptr1|106847  
AT5G13340.1 Poptr1|579985,Poptr1|65183  
Poptr1|595355  
AT4G15180.1 Poptr1|594422  
Poptr1|75497  
Poptr1|562330  
AT5G07920.1 Poptr1|569936  
AT5G63770.1 Poptr1|718683,Poptr1|715832  
AT5G39460.1,AT5G39480.1,AT5G39490.1,AT5G39450.1 Poptr1|558451,Poptr1|562506,Poptr1|53150  
AT5G39470.1  
AT5G45500.1 Poptr1|568321,Poptr1|573943  
AT5G14540.1,AT3G01560.1 Poptr1|64768  
Poptr1|570114  
AT1G15130.1 Poptr1|696542  
Poptr1|658315  
AT3G10810.1,AT3G56590.1 Poptr1|560321



Poptr1|548752  
Poptr1|349011  
AT3G63460.1 Poptr1|697534,Poptr1|64502  
AT1G18830.1  
AT1G52760.1 Poptr1|693720,Poptr1|48806  
AT2G39410.2,AT2G39400.1,AT2G39420.1 Poptr1|353485,Poptr1|567499  
AT1G11090.1 Poptr1|55765  
AT2G47630.1,AT3G62860.1 Poptr1|731823  
AT5G14980.1,AT5G19290.1 Poptr1|353389  
AT5G16120.1 Poptr1|690099  
AT3G55180.1  
AT3G55190.1  
AT1G77420.1  
Poptr1|586217  
Poptr1|710302  
Poptr1|342884  
Poptr1|582575,Poptr1|65949,Poptr1|591105  
Poptr1|555852  
AT5G08530.1 Poptr1|565894  
Poptr1|597195  
Poptr1|565060  
Poptr1|584950  
AT1G04170.1 Poptr1|554139,Poptr1|739841  
AT2G18720.1,AT4G18330.2  
AT5G09880.1,AT2G16940.1 Poptr1|716366,Poptr1|717974  
Poptr1|649194,Poptr1|648812  
AT5G24020.1 Poptr1|714241  
Poptr1|579791  
AT4G35550.1 Poptr1|650992  
AT1G20710.1  
Poptr1|652233,Poptr1|550759  
AT4G10320.1 Poptr1|689742,Poptr1|562257  
AT1G27320.1 Poptr1|684787,Poptr1|708748  
AT2G01830.2 Poptr1|55187,Poptr1|354326  
AT5G35750.1 Poptr1|573077  
AT2G17820.1 Poptr1|593825,Poptr1|349849  
Poptr1|104762  
Poptr1|585292  
Poptr1|106681  
AT5G49940.1 Poptr1|596723  
AT4G25910.1  
Poptr1|573735  
AT5G64070.1,AT5G09350.1 Poptr1|75580,Poptr1|741984  
Poptr1|681446  
AT5G39220.1 Poptr1|566934,Poptr1|577745,Poptr1|694137  
AT1G13820.1  
Poptr1|577746  
Poptr1|591186  
AT4G04910.1 Poptr1|580909,Poptr1|693940  
AT2G33835.1 Poptr1|97202  
AT3G18640.1 Poptr1|75595  
Poptr1|555770  
Poptr1|650584  
AT5G03220.1,AT5G03500.1 Poptr1|683015  
Poptr1|561207  
AT4G18905.1 Poptr1|747757,Poptr1|76351  
AT4G35370.1,AT4G18900.1  
Poptr1|593896  
AT4G35150.1,AT4G35160.1 Poptr1|557037,Poptr1|557036  
Poptr1|597596,Poptr1|690031,Poptr1|571762  
Poptr1|109208,Poptr1|582798,Poptr1|586059,Poptr1|690596,Poptr1|555739,Poptr1|107335,Poptr1|59041,  
Poptr1|590326,Poptr1|671131,Poptr1|588323,Poptr1|586060,Poptr1|705466,Poptr1|545245,Poptr1|740578,Poptr1|58  
8324,Poptr1|579082  
Poptr1|597595  
Poptr1|104292,Poptr1|588326,Poptr1|672337  
AT3G44530.1 Poptr1|697140,Poptr1|546332  
Poptr1|109287  
AT1G10580.1 Poptr1|54985,Poptr1|565006  
AT5G54520.1 Poptr1|730261  
AT4G39850.1 Poptr1|695890,Poptr1|685173  
AT5G53180.1 Poptr1|700810,Poptr1|661468  
AT3G01150.1 Poptr1|58394,Poptr1|545895  
AT5G08400.1 Poptr1|567746  
AT4G29400.1 Poptr1|572910  
Poptr1|553084  
AT4G07410.1,AT1G27470.1 Poptr1|551772,Poptr1|572025  
Poptr1|105772  
AT5G19330.1 Poptr1|696435,Poptr1|566277  
Poptr1|710754  
Poptr1|559555  
AT1G04850.1 Poptr1|683978,Poptr1|577444  
Poptr1|561295,Poptr1|645437

AT4G37070.2,AT4G37060.1  
Poptr1|591911,Poptr1|587175,Poptr1|551871,Poptr1|343063,Poptr1|703103,Poptr1|552906,Poptr1|562990

AT2G26560.1  
AT4G37050.1  
AT5G43590.1  
Poptr1|583722

AT2G45670.1 Poptr1|347905,Poptr1|572156  
AT4G27790.1 Poptr1|574722  
AT5G08580.1 Poptr1|53233,Poptr1|71762  
Poptr1|106150

AT4G01610.1,AT1G02305.1,AT1G02300.1 Poptr1|552399,Poptr1|644702  
AT1G04080.1 Poptr1|692004,Poptr1|730568  
AT5G46400.1  
AT5G28840.1 Poptr1|742031,Poptr1|662916  
AT2G40435.1,AT3G56220.1 Poptr1|701668,Poptr1|560973  
AT1G29270.1 Poptr1|555643  
Poptr1|571871,Poptr1|574509  
AT2G34680.1 Poptr1|550120,Poptr1|660635,Poptr1|108410,Poptr1|660634,Poptr1|707563  
Poptr1|642218  
Poptr1|660633

AT4G24690.1 Poptr1|728730,Poptr1|666533  
Poptr1|108161,Poptr1|666531  
Poptr1|662037

AT4G22580.1 Poptr1|554209,Poptr1|97361  
AT2G20370.1 Poptr1|349101  
AT1G68470.1 Poptr1|584611,Poptr1|550349  
AT4G13990.1 Poptr1|65041  
AT1G63450.1,AT5G41250.1 Poptr1|548474  
AT5G62220.1 Poptr1|570558,Poptr1|575713  
AT2G29040.1 Poptr1|54740  
AT2G31990.1  
Poptr1|577331  
Poptr1|664663  
Poptr1|554352

AT3G60350.1,AT2G44900.1 Poptr1|692485,Poptr1|677699  
AT2G14635.1  
Poptr1|48639  
Poptr1|571287

AT2G22125.1 Poptr1|562644,Poptr1|558578  
AT1G77460.1 Poptr1|685298  
AT1G44120.1  
Poptr1|347227

AT1G55910.1 Poptr1|642294  
Poptr1|592135

AT4G10750.1 Poptr1|350405  
AT4G24070.1,AT4G24080.1  
Poptr1|676750  
Poptr1|548272

AT5G59050.1 Poptr1|697622  
AT3G55690.1,AT2G39870.1 Poptr1|563961,Poptr1|698545,Poptr1|653049  
AT3G54000.1  
Poptr1|667934

AT3G48060.1,AT3G48050.1 Poptr1|570062,Poptr1|575122  
Poptr1|661970,Poptr1|666432  
Poptr1|728989,Poptr1|733260

AT1G17070.1 Poptr1|574017,Poptr1|571388  
AT2G42330.1  
AT5G14530.1 Poptr1|706765,Poptr1|668454  
AT5G66240.2 Poptr1|356889  
AT5G39080.1,AT5G39090.1,AT3G29670.1,AT5G39050.1,AT3G29590.1,AT3G29635.1,AT3G29680.1  
Poptr1|555879,Poptr1|589817,Poptr1|550517,Poptr1|555881,Poptr1|545650,Poptr1|583066,Poptr1|55546,  
Poptr1|594680,Poptr1|583074,Poptr1|556210,Poptr1|685090,Poptr1|586778,Poptr1|58424,Poptr1|579415,Poptr1|558  
190,Poptr1|101509,Poptr1|556311

AT1G03940.1 Poptr1|593183,Poptr1|574582  
AT5G61160.1  
AT3G29720.1  
AT3G29636.1  
AT3G29690.1  
Poptr1|98393,Poptr1|103910,Poptr1|104803,Poptr1|104938,Poptr1|99312,Poptr1|592984,Poptr1|555880,  
Poptr1|588725  
Poptr1|589779  
Poptr1|596649  
Poptr1|554817  
Poptr1|594195

AT1G75330.1 Poptr1|72934  
Poptr1|550994

AT1G11800.1 Poptr1|588570  
Poptr1|675532

AT3G27430.2,AT5G40580.1 Poptr1|736156,Poptr1|647789  
Poptr1|565977

AT4G14800.1,AT3G22630.1 Poptr1|566218,Poptr1|678915

Poptr1|564859  
 AT4G31600.1 Poptr1|353077,Poptr1|737483  
 AT2G13650.1 Poptr1|558409,Poptr1|562463  
 Poptr1|557947  
 AT1G53230.1,AT3G15030.1 Poptr1|660697  
 Poptr1|592176,Poptr1|574356  
 Poptr1|642377  
 AT1G64970.1 Poptr1|663271,Poptr1|571399  
 AT5G47730.1 Poptr1|695684,Poptr1|688632  
 AT1G55840.1  
 AT4G32160.1,AT2G25350.1 Poptr1|578225,Poptr1|352941  
 AT3G15920.1 Poptr1|703906  
 Poptr1|103791  
 AT5G13180.1 Poptr1|683598,Poptr1|693263  
 AT5G64530.1 Poptr1|343257,Poptr1|48860  
 AT3G18400.1 Poptr1|574902,Poptr1|355567  
 AT2G43000.1 Poptr1|76013,Poptr1|52077,Poptr1|347027  
 AT1G79580.1 Poptr1|564139,Poptr1|567139  
 AT2G46770.1,AT3G61910.1 Poptr1|348155,Poptr1|572457  
 AT1G76420.1 Poptr1|342098,Poptr1|73196  
 AT1G01720.1 Poptr1|694576,Poptr1|710736  
 AT5G04410.1,AT3G10500.1 Poptr1|563667  
 AT5G07680.1,AT5G61430.1 Poptr1|569497  
 AT4G28530.1 Poptr1|52151  
 AT4G27410.2 Poptr1|60203,Poptr1|728430  
 AT1G62700.1,AT1G12260.1 Poptr1|350087,Poptr1|57748,Poptr1|97354,Poptr1|570598  
 AT1G56010.2 Poptr1|71860,Poptr1|719155  
 AT1G34190.1,AT1G34180.1 Poptr1|714847,Poptr1|551262  
 AT5G18270.1,AT3G04060.1 Poptr1|571169,Poptr1|573887  
 AT5G22380.1,AT3G44350.1 Poptr1|106171,Poptr1|48946,Poptr1|723443  
 AT4G36160.1,AT2G18060.1 Poptr1|679170,Poptr1|655433  
 AT3G10490.2,AT3G10480.1 Poptr1|725099  
 AT2G27300.1 Poptr1|556827  
 AT1G52880.1,AT3G15510.1 Poptr1|660994,Poptr1|647737  
 AT2G24430.1 Poptr1|100050  
 AT5G24590.2,AT3G49530.1 Poptr1|728893,Poptr1|574652  
 AT5G09330.1,AT5G64060.1 Poptr1|703611,Poptr1|562432  
 AT3G04070.1 Poptr1|573885,Poptr1|571167  
 AT1G54330.1 Poptr1|564155  
 AT4G10350.1 Poptr1|581037  
 AT1G69490.1 Poptr1|567019  
 AT5G46590.1,AT4G17980.1 Poptr1|60234,Poptr1|356602  
 AT2G02450.2 Poptr1|596802  
 AT5G39820.1,AT1G26870.1 Poptr1|668560  
 AT3G17730.1 Poptr1|569414,Poptr1|96976  
 AT1G71930.1 Poptr1|592235  
 AT2G33480.1  
 AT5G50820.1  
 AT3G12910.1  
 AT1G77450.1  
 AT5G39610.1,AT3G29035.1  
 AT3G15500.1,AT1G52890.1  
 AT5G62380.1  
 AT1G32870.1  
 AT5G66300.1  
 AT3G04420.1  
 AT5G04400.1  
 AT5G22290.1,AT3G44290.1  
 AT1G02220.1  
 AT1G33060.2,AT4G35580.1  
 AT1G19040.1  
 AT1G32510.1  
 Poptr1|703895,Poptr1|707094  
 Poptr1|594505,Poptr1|75413  
 Poptr1|575413,Poptr1|356106  
 Poptr1|71534,Poptr1|75622  
 Poptr1|71858  
 Poptr1|640241,Poptr1|646857  
 Poptr1|727328  
 Poptr1|669459  
 Poptr1|558471,Poptr1|718664  
 Poptr1|701844  
 Poptr1|643139  
 Poptr1|557863  
 Poptr1|591981  
 Poptr1|100544,Poptr1|104337,Poptr1|587432,Poptr1|587428  
 Poptr1|556323  
 Poptr1|583590  
 Poptr1|576564,Poptr1|352489  
 Poptr1|549237,Poptr1|557862,Poptr1|554126  
 Poptr1|589418,Poptr1|555745  
 Poptr1|674296

Poptr1|352383  
Poptr1|699970  
Poptr1|672615  
Poptr1|104773  
Poptr1|700334  
Poptr1|567113  
Poptr1|667779  
Poptr1|656455  
Poptr1|663889  
Poptr1|553564  
Poptr1|673658  
Poptr1|584813  
Poptr1|574280  
Poptr1|574281  
AT3G25220.1 Poptr1|553220  
AT5G45680.1 Poptr1|691008  
AT4G39710.1 Poptr1|715944  
AT5G64350.1 Poptr1|718535  
AT3G25230.1 Poptr1|692053  
AT5G48580.1  
AT5G48570.1  
Poptr1|554616  
Poptr1|562642  
Poptr1|674429  
AT1G18170.1 Poptr1|699519  
AT1G73655.1  
AT3G02060.1 Poptr1|553109,Poptr1|57266  
Poptr1|581338  
Poptr1|102221  
AT3G11540.1 Poptr1|352484,Poptr1|576559  
AT3G11590.1 Poptr1|561459,Poptr1|576546  
Poptr1|594947,Poptr1|648968  
AT1G29900.1 Poptr1|565742  
Poptr1|581776  
Poptr1|108815  
Poptr1|590413  
AT5G48230.2 Poptr1|664897,Poptr1|652350  
AT5G47720.2  
Poptr1|108311  
AT3G15690.2,AT1G52670.1 Poptr1|63699,Poptr1|349487  
AT3G56130.1 Poptr1|656310,Poptr1|659440  
AT3G29270.1 Poptr1|728558,Poptr1|544742,Poptr1|701856  
AT1G69330.1 Poptr1|55379  
AT1G74370.1  
AT1G76590.1,AT1G21000.1 Poptr1|685484,Poptr1|684696  
AT4G17900.1 Poptr1|738386,Poptr1|646252,Poptr1|590018  
AT2G12646.1 Poptr1|583639  
AT3G60670.1 Poptr1|591671,Poptr1|552021  
AT1G43000.1  
AT5G46710.1  
AT1G32700.1  
Poptr1|354321,Poptr1|566415,Poptr1|349720,Poptr1|356453  
AT1G77180.1 Poptr1|100499,Poptr1|578522  
Poptr1|65327  
AT2G16710.1 Poptr1|725436,Poptr1|655771  
AT2G36260.1  
Poptr1|586645  
AT2G05160.1,AT3G52980.1 Poptr1|552686,Poptr1|732453  
Poptr1|348524,Poptr1|105479  
AT2G26000.2 Poptr1|719167  
AT2G42160.1 Poptr1|578923  
AT2G27160.1  
Poptr1|679104  
AT2G39960.1 Poptr1|345023,Poptr1|687331  
AT4G04200.1  
Poptr1|579250  
AT3G50220.1,AT5G67210.1 Poptr1|562940,Poptr1|558891  
Poptr1|54514,Poptr1|65209  
AT1G18280.1,AT1G73550.1,AT1G73560.1 Poptr1|575031  
AT1G62790.1 Poptr1|693494,Poptr1|671202  
AT4G12360.1  
AT2G32910.1 Poptr1|596537,Poptr1|570913,Poptr1|595527  
AT5G61910.3 Poptr1|590063  
Poptr1|105786  
AT5G13510.1 Poptr1|720654,Poptr1|698629  
AT3G12370.1  
AT1G79020.1,AT1G16690.1 Poptr1|582200  
Poptr1|563367,Poptr1|106258,Poptr1|573258  
AT4G13350.1 Poptr1|737569  
AT4G32630.1  
Poptr1|561814  
AT1G32340.1 Poptr1|590037

AT1G53400.1 Poptr1|585497,Poptr1|660832  
AT5G45740.1  
AT1G16960.1  
AT3G63510.1 Poptr1|64537,Poptr1|557785  
AT5G47970.1  
AT5G42220.1 Poptr1|550805  
AT5G25270.1 Poptr1|578825,Poptr1|583635  
AT5G11080.1  
Poptr1|559910  
AT5G51070.1 Poptr1|570396,Poptr1|733832  
AT2G25140.1 Poptr1|717883  
AT1G74310.1 Poptr1|596435  
AT5G15450.1 Poptr1|556348,Poptr1|577716  
AT4G14670.1  
Poptr1|570399  
Poptr1|588190  
AT3G49070.1 Poptr1|575854  
AT1G20180.1 Poptr1|346657,Poptr1|559872  
Poptr1|559385  
Poptr1|347117  
AT2G38830.1 Poptr1|346916  
AT5G13860.1,AT3G12400.1 Poptr1|350926,Poptr1|708425  
AT1G14570.1 Poptr1|55174,Poptr1|657058  
AT1G59550.1,AT4G14250.1  
AT3G23605.1  
AT1G03780.2 Poptr1|75311,Poptr1|594654  
AT5G44270.1  
Poptr1|107563  
AT2G47390.1 Poptr1|700400  
Poptr1|348346  
Poptr1|348345  
AT1G73010.1,AT1G17710.1 Poptr1|678457,Poptr1|657610  
AT4G29530.1  
Poptr1|736884  
AT5G24690.1 Poptr1|693797,Poptr1|709698  
Poptr1|548754  
AT4G33760.1 Poptr1|705452,Poptr1|65323,Poptr1|557552  
Poptr1|585852  
AT4G25660.1,AT4G25680.1 Poptr1|678553,Poptr1|693856  
AT5G23050.1 Poptr1|742420  
AT1G55320.1 Poptr1|708296,Poptr1|708301  
Poptr1|582476  
AT3G55620.1 Poptr1|47368  
Poptr1|695997  
Poptr1|696974  
Poptr1|558754  
AT1G15120.1 Poptr1|710786,Poptr1|651548  
Poptr1|651547,Poptr1|551330  
AT1G14290.1,AT1G69640.1 Poptr1|710720,Poptr1|685342  
Poptr1|559449  
AT1G16740.1 Poptr1|684177  
ATCG00660.1 Poptr1|61679  
Poptr1|545384  
AT5G67370.1 Poptr1|553944  
AT5G11840.1 Poptr1|561667  
AT5G24310.1,AT3G49290.1 Poptr1|569570  
Poptr1|709118,Poptr1|554521  
AT1G34370.1 Poptr1|678093,Poptr1|574295  
AT1G58170.1 Poptr1|105439,Poptr1|351040,Poptr1|547643,Poptr1|593540,Poptr1|555240,Poptr1|735096  
AT2G21110.1 Poptr1|353609  
AT2G21100.1 Poptr1|54399  
AT5G49040.1,AT3G13650.1,AT1G55210.1,AT3G13662.1  
AT3G13660.1  
AT1G22900.1,AT1G65870.1  
Poptr1|576404,Poptr1|576402  
Poptr1|578894  
Poptr1|557112  
Poptr1|640735  
Poptr1|594249  
AT4G10710.1 Poptr1|97576,Poptr1|581621,Poptr1|570674,Poptr1|570675  
AT4G10670.1  
AT2G20280.1 Poptr1|576637,Poptr1|589379,Poptr1|686520  
Poptr1|579857  
Poptr1|101250  
AT2G31660.1 Poptr1|684204,Poptr1|732174  
AT3G59020.2  
AT2G38050.1 Poptr1|595475,Poptr1|56853,Poptr1|576916  
Poptr1|588604  
AT1G52160.1,AT3G16260.1 Poptr1|683766  
AT2G35020.1,AT1G31070.2 Poptr1|712364,Poptr1|702842  
AT4G22330.1 Poptr1|568183,Poptr1|584753  
Poptr1|65072

Poptr1|597054  
 Poptr1|105543  
 AT3G09360.1,AT2G01280.1,AT2G45100.1 Poptr1|558001,Poptr1|64321  
 AT4G19550.1 Poptr1|691035  
 AT5G37510.2 Poptr1|552885,Poptr1|714215  
 Poptr1|671374  
 AT3G19720.1 Poptr1|717899  
 Poptr1|578215,Poptr1|587853,Poptr1|654154  
 AT5G62420.1 Poptr1|356790  
 AT2G21260.1,AT2G21250.1 Poptr1|697224  
 AT1G59950.1,AT1G59960.1 Poptr1|354843  
 AT3G53880.1,AT2G37790.1,AT2G37770.2 Poptr1|717244  
 Poptr1|572871  
 Poptr1|51795  
 Poptr1|345668  
 Poptr1|579618,Poptr1|735603,Poptr1|577490  
 Poptr1|576840  
 Poptr1|351819  
 Poptr1|564758,Poptr1|658639  
 AT4G02210.1 Poptr1|552487  
 AT2G24960.1 Poptr1|353036  
 Poptr1|559960  
 Poptr1|595581  
 Poptr1|570872,Poptr1|556617,Poptr1|570871,Poptr1|570870  
 AT3G11070.1,AT5G05520.1 Poptr1|687307,Poptr1|696772  
 AT3G62910.1 Poptr1|572734  
 AT1G48570.1 Poptr1|575011,Poptr1|569733  
 AT1G70650.1 Poptr1|55202  
 AT1G49340.1 Poptr1|694150,Poptr1|557279  
 AT1G51040.1  
 Poptr1|595217  
 Poptr1|580297  
 AT1G50030.1 Poptr1|697399,Poptr1|65321  
 Poptr1|589299  
 AT3G54290.1 Poptr1|353243  
 AT2G04630.1,AT5G51940.1 Poptr1|666991,Poptr1|570493  
 AT2G18500.1 Poptr1|563128  
 AT4G32060.1 Poptr1|58580  
 Poptr1|596166  
 Poptr1|578848,Poptr1|594164  
 AT3G50520.1 Poptr1|682337  
 AT5G04120.1  
 Poptr1|579742  
 AT5G66010.1 Poptr1|650984  
 AT3G20890.1 Poptr1|49051,Poptr1|557855  
 AT3G55510.1,AT2G18220.1 Poptr1|567563,Poptr1|696932,Poptr1|547680,Poptr1|555269  
 AT5G11430.1,AT2G25640.1,AT5G25520.2 Poptr1|668974,Poptr1|654071  
 Poptr1|578900  
 AT1G31310.1,AT2G35640.1 Poptr1|674636  
 AT3G18770.1 Poptr1|99896,Poptr1|549866  
 AT3G49590.1 Poptr1|700739,Poptr1|569702  
 AT1G77370.1 Poptr1|655391  
 AT5G20500.1 Poptr1|669802  
 Poptr1|591537  
 AT4G22310.1 Poptr1|568180  
 AT4G14695.1  
 AT4G05590.2  
 AT1G29150.1 Poptr1|682824,Poptr1|566988,Poptr1|563768  
 Poptr1|98469  
 ATCG00860.1,ATCG01280.1 Poptr1|581742  
 Poptr1|582657,Poptr1|582398  
 Poptr1|107813,Poptr1|107794,Poptr1|678839  
 Poptr1|586717  
 Poptr1|573431,Poptr1|580261,Poptr1|584258,Poptr1|562351,Poptr1|581704,Poptr1|579632  
 Poptr1|107511  
 Poptr1|581571,Poptr1|583549,Poptr1|580198,Poptr1|580567,Poptr1|545732,Poptr1|584216,Poptr1|59638

7

Poptr1|668836  
 Poptr1|585015,Poptr1|581340,Poptr1|583011  
 Poptr1|651165  
 Poptr1|584217  
 Poptr1|586214,Poptr1|582289,Poptr1|580423,Poptr1|582464  
 Poptr1|585929,Poptr1|585426  
 Poptr1|579915  
 Poptr1|668863,Poptr1|675852  
 Poptr1|592596,Poptr1|577525  
 Poptr1|680917  
 Poptr1|580174,Poptr1|580842  
 Poptr1|588531,Poptr1|581713,Poptr1|582494  
 Poptr1|579877  
 Poptr1|590900  
 Poptr1|585246

Poptr1|597633  
 Poptr1|579823  
 Poptr1|583114  
 Poptr1|571425  
 Poptr1|592064  
 Poptr1|586093  
 Poptr1|567458  
 AT5G22140.1,AT3G44190.1 Poptr1|64186  
 Poptr1|105986  
 AT3G11040.1,AT5G05460.1 Poptr1|567223  
 Poptr1|659457  
 Poptr1|564076  
 Poptr1|353724  
 AT1G03130.1,AT4G02770.1 Poptr1|566261,Poptr1|564827  
 AT4G34640.1 Poptr1|556526,Poptr1|686686  
 AT4G34650.1  
 AT5G19460.1,AT5G19470.1 Poptr1|98946,Poptr1|583989  
 Poptr1|579405  
 AT5G64500.1 Poptr1|557584  
 AT5G65687.1,AT2G22730.1  
 Poptr1|691781  
 AT5G23720.1 Poptr1|575447,Poptr1|570339  
 AT3G23610.1 Poptr1|746924  
 AT3G06110.2  
 AT5G18860.1 Poptr1|104199,Poptr1|354886  
 AT5G18890.1  
 AT5G18870.1  
 Poptr1|104198  
 Poptr1|570906  
 Poptr1|584785,Poptr1|354890  
 AT5G15540.1 Poptr1|556404,Poptr1|58417,Poptr1|596220,Poptr1|648542  
 AT1G55620.2 Poptr1|49520  
 AT4G35440.1 Poptr1|595045  
 Poptr1|589000  
 AT5G58440.1,AT5G07120.1 Poptr1|739073  
 AT5G37050.1  
 AT5G59710.1 Poptr1|691552,Poptr1|58328  
 AT1G07705.1  
 AT1G56700.1 Poptr1|570680,Poptr1|671512  
 AT1G23440.1  
 Poptr1|576669  
 AT2G23380.1 Poptr1|694432,Poptr1|719252  
 AT4G02020.1 Poptr1|731686  
 AT1G02580.1  
 Poptr1|348349  
 AT2G36200.1 Poptr1|688761,Poptr1|685604  
 AT5G65930.2 Poptr1|699189,Poptr1|684086  
 AT5G54670.1,AT4G27180.1 Poptr1|56005,Poptr1|730309  
 AT1G21730.1 Poptr1|551430  
 AT5G33300.1 Poptr1|551662  
 AT1G01950.1 Poptr1|342705,Poptr1|688124  
 AT4G14330.1 Poptr1|354597  
 AT3G20150.1 Poptr1|550152  
 AT3G54870.1 Poptr1|725059  
 AT3G45850.1 Poptr1|697675,Poptr1|64446  
 AT2G47500.1 Poptr1|572660  
 AT1G55550.1 Poptr1|62659,Poptr1|693139  
 AT3G12020.1 Poptr1|576397,Poptr1|695256  
 AT1G72250.1 Poptr1|569144,Poptr1|65688  
 AT3G17360.1 Poptr1|724006  
 AT5G23910.1 Poptr1|575840  
 AT3G44730.1 Poptr1|704514,Poptr1|691960  
 AT3G19050.1 Poptr1|581466  
 AT2G21380.1,AT4G39050.1 Poptr1|721903,Poptr1|694188  
 AT2G22610.1 Poptr1|347510  
 AT3G44050.1 Poptr1|594902  
 AT4G05190.1,AT4G21270.1 Poptr1|685136,Poptr1|687509  
 AT5G27550.1 Poptr1|588656,Poptr1|570825  
 AT5G41310.1,AT1G63640.2 Poptr1|63538,Poptr1|350230  
 AT1G18550.1 Poptr1|569842  
 AT5G47820.1 Poptr1|342592  
 AT4G38950.1,AT2G21300.1 Poptr1|697231,Poptr1|713145  
 AT5G27950.1,AT3G23670.1,AT3G16060.1,AT3G50240.1,AT3G49650.1,AT3G63480.1,AT1G20060.1,AT5G02370.1,AT1G59540.1,AT2G28620.1,AT4G14150.1,AT3G10180.1,AT2G37420.1,AT5G60930.1,AT5G06670.1  
 Poptr1|703390,Poptr1|729466,Poptr1|699927,Poptr1|574896,Poptr1|685824,Poptr1|695434,Poptr1|56936,  
 Poptr1|53299,Poptr1|737578,Poptr1|574931,Poptr1|560481,Poptr1|581927,Poptr1|560735,Poptr1|576621,Poptr1|588  
 144,Poptr1|548564,Poptr1|569827,Poptr1|76446,Poptr1|693480,Poptr1|346737,Poptr1|719691,Poptr1|345828,Poptr1|  
 343118,Poptr1|551661  
 AT4G26660.1,AT5G55520.1  
 AT1G73860.1,AT1G18410.1,AT1G09170.1,AT3G10310.1,AT5G27000.1  
 AT5G66310.1,AT3G51150.1  
 AT5G42490.1,AT4G24170.1

AT1G18370.1  
AT1G12430.1  
Poptr1|551431  
Poptr1|353346  
Poptr1|573136  
Poptr1|589449,Poptr1|591579,Poptr1|583628  
Poptr1|692280  
Poptr1|692281  
Poptr1|72164  
Poptr1|681735,Poptr1|592614,Poptr1|590965  
Poptr1|595613  
Poptr1|590877  
Poptr1|680450  
Poptr1|569826  
Poptr1|102775  
Poptr1|570882  
Poptr1|579808  
Poptr1|548842  
Poptr1|347560  
AT2G40940.1 Poptr1|692284  
AT1G66340.1 Poptr1|740885,Poptr1|683754  
AT3G23150.1 Poptr1|566121,Poptr1|696369,Poptr1|705056  
AT1G04310.1  
Poptr1|589003  
AT3G56740.1,AT2G41160.1 Poptr1|717498  
Poptr1|57921  
AT1G30680.1 Poptr1|65891  
AT1G30660.1  
AT3G57290.1 Poptr1|667362,Poptr1|652677  
AT2G39240.1,AT1G30590.1,AT2G34750.1 Poptr1|71863  
Poptr1|562890  
AT1G43710.1 Poptr1|685320,Poptr1|692781  
AT2G35610.1 Poptr1|742677  
AT4G23100.1 Poptr1|709341,Poptr1|682050  
Poptr1|584196  
AT1G69030.1,AT1G26300.1 Poptr1|687210,Poptr1|354088  
AT3G24820.1 Poptr1|645413  
AT4G28070.2 Poptr1|578686  
AT4G30490.1  
AT5G24380.1,AT5G53550.1 Poptr1|569642  
AT3G27020.1,AT5G41000.1 Poptr1|707057  
AT3G17650.1,AT1G48370.1 Poptr1|545067,Poptr1|585868,Poptr1|585857  
AT4G24120.1 Poptr1|683637,Poptr1|48647  
AT1G65730.1  
AT5G45450.1  
Poptr1|584191,Poptr1|569651  
Poptr1|588696  
Poptr1|585859,Poptr1|585860,Poptr1|585864,Poptr1|587762  
Poptr1|104441  
Poptr1|555566  
Poptr1|592945  
Poptr1|585867  
AT1G21312.1,AT1G76940.1 Poptr1|569593,Poptr1|574709  
Poptr1|643505  
Poptr1|695109  
AT1G18270.1 Poptr1|733115  
Poptr1|666316  
Poptr1|676923  
Poptr1|666315  
AT3G53180.1 Poptr1|589509  
AT1G55520.1,AT3G13445.1 Poptr1|702425  
Poptr1|573909  
AT1G24265.1,AT1G24267.2 Poptr1|554754,Poptr1|63151  
AT1G78900.1 Poptr1|655642,Poptr1|698731  
AT1G16820.1  
AT2G23820.2 Poptr1|717716  
AT1G26160.1  
AT5G14200.1,AT1G80560.1,AT1G31180.1 Poptr1|705751  
Poptr1|585285  
AT5G37830.1 Poptr1|555933  
Poptr1|588206  
Poptr1|108915  
Poptr1|587125  
Poptr1|645284  
AT2G07050.1 Poptr1|717351,Poptr1|584549  
AT1G78950.1,AT1G78955.1 Poptr1|744763  
AT1G66960.1,AT1G78970.1,AT1G78960.1  
AT5G42600.1,AT5G48010.1,AT4G15370.1,AT1G78500.1,AT5G36150.1,AT4G15340.1  
Poptr1|344217  
Poptr1|582229  
Poptr1|686139  
Poptr1|579920



Poptr1|597517  
Poptr1|592495  
Poptr1|102820,Poptr1|97981  
Poptr1|546595,Poptr1|101026  
Poptr1|563377  
Poptr1|102941,Poptr1|48552  
Poptr1|102819  
AT2G14110.1 Poptr1|701737,Poptr1|668318  
Poptr1|577220  
AT3G55800.1 Poptr1|563976,Poptr1|567316  
AT3G18380.2 Poptr1|65554,Poptr1|728097,Poptr1|584262  
AT1G15215.3 Poptr1|705799  
Poptr1|668881  
AT3G56640.1 Poptr1|652542  
AT4G02350.1 Poptr1|664416,Poptr1|342889  
AT4G26430.1,AT5G56280.1 Poptr1|744837  
Poptr1|550680  
AT5G42000.1 Poptr1|646803,Poptr1|691054  
AT1G01230.1 Poptr1|692349,Poptr1|731385  
AT1G02860.1 Poptr1|572701,Poptr1|644742  
AT2G38920.1 Poptr1|685659,Poptr1|576441  
AT2G46220.1 Poptr1|572328  
AT1G16320.1,AT1G79510.1 Poptr1|353811  
AT5G40820.1 Poptr1|694256  
AT5G41220.1,AT5G41210.1,AT5G41240.1 Poptr1|684880,Poptr1|709375  
Poptr1|548476  
AT4G37850.1,AT2G22750.1 Poptr1|71831,Poptr1|655501,Poptr1|550059,Poptr1|557581  
AT1G32640.1 Poptr1|743129,Poptr1|676550  
AT4G16430.1 Poptr1|52132,Poptr1|342256  
AT1G01260.1 Poptr1|348090  
AT4G21330.1 Poptr1|555444  
AT2G22760.1,AT2G22770.1  
AT5G46760.1,AT4G17880.1  
AT5G46830.1  
AT2G46510.1  
Poptr1|731360  
AT4G24810.2 Poptr1|570210,Poptr1|733527  
AT5G50330.1  
Poptr1|592113,Poptr1|355915  
AT5G12040.1 Poptr1|685574  
AT1G22520.1,AT1G72170.1 Poptr1|574232,Poptr1|592304  
AT1G05785.1 Poptr1|664706  
AT3G49420.1,AT5G01430.1 Poptr1|689740,Poptr1|695784  
AT3G03180.1  
AT5G46030.1 Poptr1|568625,Poptr1|684053  
Poptr1|591705,Poptr1|591706,Poptr1|584425  
AT5G57600.1 Poptr1|585169  
AT5G57590.1 Poptr1|585170  
Poptr1|578624  
Poptr1|669463  
AT5G55530.1 Poptr1|568532,Poptr1|49378  
AT5G12300.1 Poptr1|557688,Poptr1|64633  
AT1G50570.1  
AT5G03300.1,AT3G09820.1 Poptr1|659896,Poptr1|720292  
Poptr1|544816  
AT5G10170.1,AT2G22240.1 Poptr1|685176,Poptr1|562631  
AT4G39800.1  
AT4G14880.1 Poptr1|703646,Poptr1|662872,Poptr1|345408,Poptr1|673917  
AT1G55880.1 Poptr1|707666  
AT2G43750.1,AT3G59760.1 Poptr1|745033  
AT5G28030.1,AT5G28020.1,AT3G04940.1 Poptr1|703648,Poptr1|595469,Poptr1|570971,Poptr1|595472  
AT3G61440.1 Poptr1|552183,Poptr1|572275  
AT3G03630.1  
AT3G22460.1  
Poptr1|107246  
Poptr1|592803  
Poptr1|590257  
Poptr1|586625  
Poptr1|570972  
Poptr1|644477  
Poptr1|552184  
AT1G70820.1 Poptr1|686300  
AT5G17530.1 Poptr1|698665,Poptr1|563738  
Poptr1|107098  
AT5G09300.1 Poptr1|559310,Poptr1|681981  
AT5G34780.1,AT1G21400.1  
Poptr1|694283  
AT1G11915.1 Poptr1|99324,Poptr1|568058  
AT1G10380.1 Poptr1|566080  
Poptr1|649095,Poptr1|564299  
Poptr1|659213,Poptr1|562580  
AT3G28760.2 Poptr1|58373

AT5G15510.1,AT3G01015.1 Poptr1|546644,Poptr1|357191  
AT5G37478.1 Poptr1|592874  
Poptr1|668651  
AT3G23090.1 Poptr1|566133,Poptr1|564928  
AT1G54460.1 Poptr1|705429,Poptr1|595399  
AT3G04630.1  
AT4G38640.1 Poptr1|649242,Poptr1|648768  
AT2G39470.1 Poptr1|698604  
AT3G55330.1 Poptr1|567482  
Poptr1|353502  
Poptr1|353500  
AT3G12130.1,AT5G06770.1 Poptr1|344460,Poptr1|684703,Poptr1|639722,Poptr1|576266  
AT1G04970.1 Poptr1|573035  
AT3G20270.1  
Poptr1|65421  
Poptr1|49366  
AT3G03750.2 Poptr1|571260  
AT4G13460.1 Poptr1|725965,Poptr1|657329  
AT5G04940.1 Poptr1|690843,Poptr1|350945,Poptr1|590678  
AT2G33290.1  
AT2G24740.1,AT1G73100.1  
AT2G05900.1  
AT1G17770.1  
Poptr1|565010  
Poptr1|667218,Poptr1|351328  
Poptr1|574323  
AT2G38560.1 Poptr1|560996  
AT4G32530.1,AT2G25610.1 Poptr1|578160,Poptr1|341802  
AT5G55200.1,AT4G26780.1 Poptr1|698963,Poptr1|688468  
AT3G63270.1 Poptr1|551142  
AT3G55350.1 Poptr1|563855  
Poptr1|65196  
AT2G16950.1 Poptr1|713392,Poptr1|54365  
AT2G16960.1  
AT5G57960.1 Poptr1|643058  
Poptr1|643059  
Poptr1|651980  
AT4G30950.1 Poptr1|352328  
Poptr1|578752  
AT3G06860.1 Poptr1|596130,Poptr1|725675  
AT4G16800.1 Poptr1|346190,Poptr1|712380  
AT5G43280.1 Poptr1|548063  
AT4G29010.1 Poptr1|689104  
AT3G15290.1 Poptr1|742962  
Poptr1|107521  
Poptr1|584348,Poptr1|596131  
Poptr1|644770  
Poptr1|581707  
Poptr1|590655  
Poptr1|108080,Poptr1|590665  
Poptr1|554732  
Poptr1|592531  
Poptr1|579162  
AT1G79660.1,AT1G16170.1  
Poptr1|48472,Poptr1|680643,Poptr1|555150,Poptr1|639745,Poptr1|579268,Poptr1|589164  
AT5G41370.1,AT5G41360.1 Poptr1|63516  
Poptr1|674287  
AT2G02560.1 Poptr1|703806,Poptr1|583461  
Poptr1|678775  
AT5G45600.1 Poptr1|557155,Poptr1|694201  
Poptr1|719737  
AT1G67370.1 Poptr1|554797,Poptr1|63120  
AT1G65260.1 Poptr1|667879,Poptr1|589480  
AT5G24130.1 Poptr1|574821,Poptr1|586562,Poptr1|574819,Poptr1|591381  
Poptr1|593592,Poptr1|106970,Poptr1|586560  
AT5G17350.1,AT3G03280.1 Poptr1|566530,Poptr1|553043,Poptr1|354225,Poptr1|546485  
AT1G17100.1 Poptr1|681875  
AT1G78450.1  
AT1G78460.1  
Poptr1|699406,Poptr1|700947  
Poptr1|690974  
AT1G06440.1 Poptr1|592637,Poptr1|348994  
AT3G63090.1 Poptr1|644978  
AT3G58520.1 Poptr1|352209  
AT2G31290.1 Poptr1|72580  
AT2G39120.1 Poptr1|563712  
AT5G48040.1 Poptr1|348654  
AT4G08940.1 Poptr1|347395  
AT1G71850.1 Poptr1|592213  
AT5G62990.1 Poptr1|348689  
AT4G33495.1 Poptr1|667007  
AT5G21970.1 Poptr1|561556

AT5G45790.1 Poptr1|576106  
Poptr1|590561  
Poptr1|576412  
Poptr1|659908  
Poptr1|552260  
Poptr1|570472,Poptr1|591581  
AT5G55810.1 Poptr1|61502,Poptr1|570836  
AT1G32410.1 Poptr1|678023,Poptr1|676506,Poptr1|743194  
AT3G11530.2 Poptr1|344537  
Poptr1|576562  
AT2G33385.1 Poptr1|725907,Poptr1|345464  
AT1G30825.1 Poptr1|711859,Poptr1|708923  
AT1G30630.1 Poptr1|682744  
AT2G34840.1  
AT1G48520.1 Poptr1|345472  
AT1G45230.1 Poptr1|644113,Poptr1|703121  
AT3G46630.1 Poptr1|592003,Poptr1|740486  
Poptr1|592002  
AT4G20050.1 Poptr1|588705,Poptr1|553848,Poptr1|739794  
AT4G20040.1 Poptr1|349719,Poptr1|349718  
Poptr1|670231  
AT2G25740.1 Poptr1|695053,Poptr1|578031  
AT3G23890.1 Poptr1|557797,Poptr1|64530  
AT2G13720.1  
Poptr1|575293  
AT5G64260.1 Poptr1|549850,Poptr1|577384  
AT4G08950.1 Poptr1|651266,Poptr1|101857,Poptr1|559076,Poptr1|551592,Poptr1|680592,Poptr1|747249  
AT2G17230.1 Poptr1|556770,Poptr1|595010  
AT5G51550.1 Poptr1|734007  
AT5G09440.1  
AT1G35140.1  
Poptr1|551595  
Poptr1|572662  
Poptr1|579928,Poptr1|106711,Poptr1|551593,Poptr1|596022,Poptr1|589733  
Poptr1|651265  
Poptr1|570583  
AT1G79690.1 Poptr1|705248  
Poptr1|350973,Poptr1|350752  
Poptr1|583757,Poptr1|647209  
AT2G38710.1 Poptr1|697004,Poptr1|725410  
Poptr1|594712  
Poptr1|593708,Poptr1|353238  
Poptr1|563565  
AT1G22930.1 Poptr1|349244,Poptr1|704842,Poptr1|592309  
AT4G09150.1  
AT5G36210.1 Poptr1|347680  
AT5G18410.1 Poptr1|573779  
Poptr1|663018,Poptr1|573780  
Poptr1|571137  
Poptr1|663017  
Poptr1|663019  
Poptr1|573781  
AT2G16060.1 Poptr1|557304  
AT3G10520.1  
Poptr1|557303  
AT2G15290.1 Poptr1|642036,Poptr1|697352  
AT2G26110.1 Poptr1|577950,Poptr1|561661  
AT4G26130.1,AT5G56980.1 Poptr1|352092  
AT1G70770.1,AT1G23170.1 Poptr1|564636,Poptr1|566476  
AT3G11880.1  
Poptr1|645286  
Poptr1|648088  
AT3G04590.2 Poptr1|586801,Poptr1|729872  
AT2G45850.1,AT3G61310.1 Poptr1|347963,Poptr1|343629,Poptr1|572234  
AT5G62260.1 Poptr1|663815,Poptr1|570570  
AT2G33620.1 Poptr1|346537,Poptr1|52284  
AT4G22770.1,AT4G12080.1 Poptr1|581183  
AT5G28590.1  
AT1G63480.1,AT1G63470.1  
AT5G51590.1,AT4G25320.1  
AT4G00200.1  
AT5G46640.1,AT4G17950.1  
Poptr1|644342  
Poptr1|594846,Poptr1|556937  
Poptr1|554255  
Poptr1|677520,Poptr1|646504  
Poptr1|676539  
AT2G32520.1 Poptr1|732264  
Poptr1|591358,Poptr1|552778  
AT2G36300.1,AT3G52760.1 Poptr1|594860,Poptr1|556912  
AT2G27900.1 Poptr1|709681  
Poptr1|558346

Poptr1|558347  
Poptr1|558348  
AT1G50920.1 Poptr1|549253,Poptr1|722916  
AT1G10300.1  
AT3G23860.1  
AT3G43240.1 Poptr1|702688,Poptr1|577798  
AT1G02475.1 Poptr1|572557,Poptr1|692238  
AT1G02470.1  
AT4G01883.1  
AT4G24830.1 Poptr1|655770,Poptr1|725430  
Poptr1|579188  
AT1G57770.1 Poptr1|583501  
Poptr1|591091  
AT2G20360.1 Poptr1|645558,Poptr1|573379  
Poptr1|680727  
Poptr1|589781  
AT4G24015.1 Poptr1|693365,Poptr1|63397  
AT3G11110.1 Poptr1|353702  
AT3G16720.1 Poptr1|725649,Poptr1|596113  
AT5G47610.1,AT4G17245.1 Poptr1|550497,Poptr1|569229  
AT2G37580.1 Poptr1|693200  
AT3G61550.1,AT2G46160.1 Poptr1|644532,Poptr1|57056  
AT3G03550.1,AT5G17600.1 Poptr1|349896,Poptr1|56761,Poptr1|590021,Poptr1|574023  
AT3G60966.1 Poptr1|677725  
AT4G28890.1,AT2G20030.1 Poptr1|578072,Poptr1|352780  
AT4G17920.1 Poptr1|590023,Poptr1|349900  
AT2G27940.1 Poptr1|548737  
AT5G27420.1,AT3G05200.1 Poptr1|595571,Poptr1|662781  
AT2G17730.1,AT4G35840.1 Poptr1|346337  
AT2G18670.1,AT4G30370.1 Poptr1|578660,Poptr1|352425  
AT1G76410.1,AT1G20823.1 Poptr1|559985,Poptr1|550739  
AT2G35910.1 Poptr1|58024,Poptr1|352160  
AT3G43430.1,AT5G20885.1 Poptr1|717609,Poptr1|578029  
AT1G72200.1,AT1G22500.1 Poptr1|651234  
AT1G49230.1 Poptr1|65144,Poptr1|585933  
AT5G07040.1 Poptr1|584783,Poptr1|547786,Poptr1|350909  
AT4G33565.1 Poptr1|562405,Poptr1|558488,Poptr1|577362,Poptr1|562550  
AT3G18930.1 Poptr1|557309  
AT5G42200.1 Poptr1|642904,Poptr1|559879  
AT5G58580.1 Poptr1|557654,Poptr1|549430  
AT2G47560.1,AT3G62690.1  
AT3G19140.1  
AT4G15975.1  
AT5G41430.1  
AT2G35420.1  
AT1G35330.1,AT4G09120.1,AT4G09130.1,AT2G35000.1  
AT4G40070.1  
AT4G09110.1  
AT4G09100.1  
AT5G66070.2  
AT1G74410.1  
AT5G06490.1  
AT2G34990.1  
AT1G53010.1  
AT3G18773.1,AT1G49210.1,AT1G49200.1,AT1G49220.1  
Poptr1|595864  
Poptr1|356879  
Poptr1|588735,Poptr1|588736,Poptr1|563889,Poptr1|567435,Poptr1|352014,Poptr1|567436  
Poptr1|578510  
Poptr1|746418  
Poptr1|65683  
Poptr1|73091  
Poptr1|346646,Poptr1|73090  
Poptr1|53283,Poptr1|716114  
Poptr1|563561,Poptr1|567883,Poptr1|567882  
Poptr1|550467,Poptr1|699205  
Poptr1|585932  
Poptr1|355244  
AT3G09350.1 Poptr1|576815,Poptr1|351799  
AT5G02150.1  
AT3G53800.1  
AT3G52790.1 Poptr1|55629  
AT5G62150.1 Poptr1|575761,Poptr1|570510,Poptr1|57004,Poptr1|552104  
AT4G25433.1  
AT2G15220.1,AT2G15130.1 Poptr1|649635,Poptr1|549955,Poptr1|549954  
AT2G15170.1  
Poptr1|107957  
AT4G24720.1,AT5G50200.1 Poptr1|699402,Poptr1|748317,Poptr1|575245  
Poptr1|591178,Poptr1|574016  
AT4G23620.1 Poptr1|691105  
AT5G66860.1 Poptr1|651041,Poptr1|696043  
Poptr1|586953

AT1G06570.1 Poptr1|551224  
Poptr1|559505  
AT1G12600.1 Poptr1|350162,Poptr1|700195,Poptr1|691165  
AT4G23010.1  
AT2G02810.1,AT1G14360.1 Poptr1|577205,Poptr1|653231  
AT5G59740.1,AT3G46180.1 Poptr1|64436  
AT1G58320.1 Poptr1|566651  
AT1G49030.1,AT3G18460.1 Poptr1|569870  
AT1G14880.1,AT1G14870.1,AT5G35525.1 Poptr1|564646,Poptr1|564647,Poptr1|658735  
AT2G40935.1 Poptr1|652484  
AT1G68630.1  
AT1G52200.1  
AT3G18470.1  
AT3G18450.1  
Poptr1|698171,Poptr1|705496,Poptr1|562984,Poptr1|104425  
Poptr1|345984  
Poptr1|575281  
Poptr1|587401  
AT1G73990.1 Poptr1|574895  
Poptr1|574892  
Poptr1|666214  
Poptr1|574894  
AT5G63890.2 Poptr1|690278,Poptr1|550607  
Poptr1|588995  
AT3G07220.1 Poptr1|711559  
AT3G07260.1  
AT4G21110.1 Poptr1|649108,Poptr1|741620  
AT5G09570.1 Poptr1|697428,Poptr1|706648  
AT5G64400.2  
AT5G14620.1,AT5G15380.1 Poptr1|641622  
Poptr1|591765  
AT2G03820.1 Poptr1|555983,Poptr1|556328  
Poptr1|106599  
Poptr1|343051  
AT2G15620.1 Poptr1|704323  
Poptr1|54502  
AT5G19530.1 Poptr1|685577  
Poptr1|564829,Poptr1|726566  
AT1G17210.1 Poptr1|660535  
AT1G48950.1 Poptr1|660537,Poptr1|703761  
Poptr1|569843  
AT1G10740.1 Poptr1|565174  
AT1G23330.1  
Poptr1|589797,Poptr1|544950,Poptr1|687056  
Poptr1|555897  
AT5G62980.1,AT3G21730.1,AT3G11750.1 Poptr1|667587  
AT1G14060.1 Poptr1|592379,Poptr1|574259  
AT2G03230.1  
AT5G57640.1  
AT5G02210.1  
ATCG00270.1 Poptr1|61553  
Poptr1|573814  
Poptr1|674183  
Poptr1|670136  
Poptr1|61589  
AT1G03160.1 Poptr1|559548  
Poptr1|551181  
AT2G40600.1 Poptr1|571648  
Poptr1|108666  
AT1G71220.1 Poptr1|645663  
Poptr1|645665  
Poptr1|593361  
Poptr1|583570  
Poptr1|645664  
Poptr1|553426  
Poptr1|553425  
AT3G19970.1 Poptr1|51767,Poptr1|654944  
AT2G18245.1 Poptr1|696108  
Poptr1|75889  
AT1G26320.1,AT5G38000.1,AT5G17000.1,AT5G37940.1,AT5G16990.1,AT3G03080.1,AT5G37980.1,AT5G16970.1,AT5G16960.1 Poptr1|718141,Poptr1|585057,Poptr1|673777,Poptr1|695721,Poptr1|718156,Poptr1|718149  
AT1G65560.1 Poptr1|567152  
AT5G16980.1  
AT5G37960.1  
Poptr1|654349  
Poptr1|585053,Poptr1|102923,Poptr1|585056,Poptr1|585060,Poptr1|585062  
Poptr1|102926,Poptr1|585075,Poptr1|585055  
Poptr1|344182  
Poptr1|585090,Poptr1|585084,Poptr1|99566,Poptr1|585082,Poptr1|705261,Poptr1|585093  
Poptr1|102925  
Poptr1|673264,Poptr1|680901  
Poptr1|107003

Poptr1|585131  
Poptr1|562100  
Poptr1|351619  
AT4G09550.1,AT1G73790.1 Poptr1|652558,Poptr1|576147  
AT1G69740.1 Poptr1|692732  
AT1G44318.1  
Poptr1|108345,Poptr1|107760  
AT1G74790.1 Poptr1|575064  
AT5G39970.1 Poptr1|577557  
AT5G62630.1  
AT1G71015.1 Poptr1|345298,Poptr1|648121,Poptr1|709990  
AT1G66480.1,AT5G37840.1  
AT3G27240.1,AT5G40810.1 Poptr1|48092,Poptr1|721295  
AT4G19460.1 Poptr1|356766,Poptr1|554146  
AT1G73160.1 Poptr1|55864  
Poptr1|65586  
AT5G43600.1 Poptr1|698021  
AT3G48110.1 Poptr1|677674  
Poptr1|677675  
AT5G13630.1 Poptr1|695539  
Poptr1|673663  
AT4G14100.1,AT3G23760.1 Poptr1|63223,Poptr1|682972  
Poptr1|554673  
Poptr1|578636  
AT2G24300.2,AT4G31000.1 Poptr1|58759,Poptr1|344475  
AT4G25800.1,AT5G57580.1 Poptr1|568295,Poptr1|702186  
AT5G62570.1 Poptr1|733232,Poptr1|570056  
AT1G73805.1 Poptr1|699504,Poptr1|574923  
AT2G18750.1  
AT1G73800.1  
Poptr1|108125  
Poptr1|355122  
Poptr1|568296,Poptr1|591347  
Poptr1|699701,Poptr1|581935  
Poptr1|570054  
AT4G39670.1 Poptr1|354161  
AT2G34690.1 Poptr1|576352,Poptr1|685798,Poptr1|585335  
Poptr1|566636  
AT5G46720.1 Poptr1|60224  
AT1G27330.1,AT1G27350.1 Poptr1|711867  
Poptr1|716846  
Poptr1|575898  
Poptr1|690944  
AT5G07710.1,AT5G61390.1 Poptr1|581379  
AT4G39810.1 Poptr1|71674,Poptr1|562635  
AT1G74390.1  
AT4G24040.1 Poptr1|712296,Poptr1|683643,Poptr1|350388  
Poptr1|560598  
AT3G13410.1 Poptr1|62661  
Poptr1|588082,Poptr1|593009,Poptr1|595654,Poptr1|597265  
AT4G37280.1 Poptr1|76056  
Poptr1|551816,Poptr1|703154  
AT5G19900.1 Poptr1|547667,Poptr1|555262  
AT4G37980.1,AT4G37990.1  
Poptr1|735177,Poptr1|653426,Poptr1|557762,Poptr1|54645,Poptr1|549334,Poptr1|667694,Poptr1|649947,  
Poptr1|587092  
AT4G39330.1 Poptr1|549886  
AT4G34230.1,AT3G19450.1 Poptr1|649626  
AT1G72680.1 Poptr1|351300,Poptr1|576047,Poptr1|343883  
AT4G37970.1  
AT2G21730.1,AT2G21890.1  
Poptr1|550258  
Poptr1|569971  
Poptr1|649951  
Poptr1|684659  
Poptr1|587857,Poptr1|104862  
Poptr1|76057  
Poptr1|49305  
Poptr1|579660  
Poptr1|576046  
Poptr1|699197  
AT4G35080.1,AT2G16800.1 Poptr1|648800  
AT5G25450.1 Poptr1|654109  
AT4G32470.1  
Poptr1|584504  
AT2G06520.1 Poptr1|745104,Poptr1|739111,Poptr1|685576  
AT5G18420.2 Poptr1|545413,Poptr1|692121,Poptr1|585317  
AT1G54310.2 Poptr1|724233  
Poptr1|353798  
AT4G14746.1 Poptr1|657197  
Poptr1|349525,Poptr1|63743  
Poptr1|571022,Poptr1|680287

ATMG01360.1 Poptr1|101785  
Poptr1|109211  
Poptr1|592553  
Poptr1|596272  
ATMG00300.1 Poptr1|98048,Poptr1|100624,Poptr1|357180  
AT1G06890.1 Poptr1|574488,Poptr1|571879  
AT1G76670.1,AT1G21070.1 Poptr1|346503,Poptr1|694941  
AT5G55950.1 Poptr1|707727  
AT4G39390.1 Poptr1|684550,Poptr1|695945,Poptr1|694359  
AT1G34020.1,AT4G09810.1 Poptr1|559417  
AT2G30460.1  
AT5G42420.1  
AT5G57100.1  
Poptr1|585984  
Poptr1|582266,Poptr1|703598  
Poptr1|677960  
AT3G24840.1 Poptr1|348977  
AT5G56160.1,AT1G55690.1 Poptr1|708198  
AT4G39180.1,AT2G21540.1 Poptr1|556493  
AT2G18180.1,AT4G36490.1 Poptr1|593901,Poptr1|53401  
AT4G39170.1 Poptr1|556494,Poptr1|697258  
AT5G47510.1 Poptr1|356459,Poptr1|349726  
AT4G34580.1,AT2G16380.1  
AT1G75370.1,AT1G19650.1  
AT2G21520.1  
Poptr1|98101  
Poptr1|98100  
Poptr1|649382  
Poptr1|52173,Poptr1|346784  
Poptr1|103601  
AT5G01660.1 Poptr1|577085  
Poptr1|108993  
Poptr1|353736  
AT4G32440.2,AT2G25590.1 Poptr1|352893,Poptr1|578178  
AT5G20030.1  
Poptr1|640645  
Poptr1|692860  
AT1G51510.1 Poptr1|691339,Poptr1|722954  
Poptr1|560478  
AT1G55140.1,AT3G13740.1 Poptr1|683315  
Poptr1|592753  
AT5G15930.1,AT3G02460.1 Poptr1|580743  
Poptr1|648327  
Poptr1|580747  
AT1G30300.1 Poptr1|687513  
AT4G03610.1  
AT3G58640.1 Poptr1|57259  
AT2G31010.1  
AT2G42640.1  
Poptr1|348480  
AT5G36110.1 Poptr1|560762,Poptr1|99227,Poptr1|578977  
AT5G36140.1  
AT5G36130.1  
Poptr1|578986,Poptr1|736629,Poptr1|578988,Poptr1|578981  
Poptr1|571546,Poptr1|574115,Poptr1|567996,Poptr1|567997,Poptr1|547584,Poptr1|555344,Poptr1|54483  
1,Poptr1|563379,Poptr1|588180  
Poptr1|592301,Poptr1|574248  
Poptr1|586866,Poptr1|547582,Poptr1|569310  
Poptr1|597593,Poptr1|547583  
Poptr1|107084  
Poptr1|582998,Poptr1|570407  
Poptr1|104086  
Poptr1|567992  
AT3G05290.1,AT5G27520.1 Poptr1|595594,Poptr1|699760  
Poptr1|55150  
AT2G29590.1 Poptr1|723121  
AT1G04290.1 Poptr1|556283,Poptr1|714548  
AT4G36050.2 Poptr1|349864  
Poptr1|593841  
AT5G42390.1 Poptr1|732164,Poptr1|692108  
Poptr1|661627  
AT5G23950.1 Poptr1|728541  
AT1G07310.1 Poptr1|706032,Poptr1|697595  
Poptr1|656208,Poptr1|567308  
AT4G23800.1,AT4G11080.1 Poptr1|693390  
Poptr1|548360  
AT5G07660.1,AT5G61460.1 Poptr1|684930  
AT2G25320.1,AT2G25330.1 Poptr1|642651,Poptr1|561919,Poptr1|578231  
Poptr1|654172  
Poptr1|560568  
Poptr1|578230  
AT4G32350.1 Poptr1|578455

AT1G79910.1 Poptr1|349561,Poptr1|63983,Poptr1|102937  
AT1G52315.1  
Poptr1|590233  
AT5G11950.1 Poptr1|561635  
AT5G06300.1 Poptr1|717079,Poptr1|576524  
AT3G53450.1,AT2G37210.1 Poptr1|667811,Poptr1|59161  
AT2G28305.1 Poptr1|686929,Poptr1|595075  
AT4G35190.1 Poptr1|713418,Poptr1|346605,Poptr1|557017,Poptr1|715601  
AT5G26140.1  
AT2G35990.1  
AT5G03270.1  
Poptr1|580245  
Poptr1|711981,Poptr1|708284  
Poptr1|571440  
Poptr1|597679,Poptr1|597143,Poptr1|587477,Poptr1|72086,Poptr1|587349,Poptr1|576731,Poptr1|593470,  
Poptr1|355688,Poptr1|577493,Poptr1|576756,Poptr1|593164,Poptr1|585214,Poptr1|577478,Poptr1|574033,Poptr1|58  
4817,Poptr1|99105,Poptr1|573442,Poptr1|355698,Poptr1|553364,Poptr1|596513,Poptr1|663404,Poptr1|99644,Poptr1|  
596502,Poptr1|587963,Poptr1|553363,Poptr1|351807,Poptr1|565629,Poptr1|594393,Poptr1|573481,Poptr1|64104,Pop  
tr1|593703,Poptr1|569949,Poptr1|593422,Poptr1|545942,Poptr1|586437,Poptr1|583737,Poptr1|590337,Poptr1|9805  
3,Poptr1|577072,Poptr1|577816,Poptr1|51913,Poptr1|565624,Poptr1|574850,Poptr1|596687,Poptr1|590357,Poptr1|59  
2960,Poptr1|98777,Poptr1|545683,Poptr1|596404,Poptr1|568404,Poptr1|588852,Poptr1|579202,Poptr1|562835,Poptr  
1|590874,Poptr1|553568,Poptr1|577446,Poptr1|578042,Poptr1|585415  
Poptr1|588552,Poptr1|587012,Poptr1|597201,Poptr1|585223,Poptr1|576718,Poptr1|586282,Poptr1|57172  
2,Poptr1|97714,Poptr1|584265,Poptr1|597475,Poptr1|597167,Poptr1|584777,Poptr1|580232,Poptr1|65737,Poptr1|587  
804,Poptr1|584396,Poptr1|585681,Poptr1|582923,Poptr1|652045,Poptr1|584992,Poptr1|553954,Poptr1|588676,Poptr  
1|585287,Poptr1|585995,Poptr1|595235,Poptr1|584386,Poptr1|558374,Poptr1|553523  
Poptr1|596601,Poptr1|585539,Poptr1|582381,Poptr1|109117,Poptr1|584368,Poptr1|586274,Poptr1|58339  
8,Poptr1|109276,Poptr1|568754,Poptr1|584856,Poptr1|569994,Poptr1|584400,Poptr1|597590,Poptr1|591519,Poptr1|5  
77806,Poptr1|108180,Poptr1|587488,Poptr1|565935,Poptr1|588547,Poptr1|593576,Poptr1|593273,Poptr1|107661,Pop  
tr1|585428,Poptr1|592480,Poptr1|582146,Poptr1|582491,Poptr1|590468,Poptr1|352145,Poptr1|571714,Poptr1|5524  
20,Poptr1|571715,Poptr1|579329,Poptr1|584214,Poptr1|593608,Poptr1|107931,Poptr1|101256,Poptr1|595236,Poptr1|  
584204,Poptr1|583375,Poptr1|587995,Poptr1|671565,Poptr1|580233,Poptr1|581419,Poptr1|582933,Poptr1|579514,Pop  
tr1|590200,Poptr1|545770,Poptr1|562911,Poptr1|595699,Poptr1|588784,Poptr1|585427,Poptr1|65505,Poptr1|58045  
2,Poptr1|580835,Poptr1|107362,Poptr1|597002,Poptr1|585471,Poptr1|585175,Poptr1|571153,Poptr1|584988,Poptr1|3  
45641,Poptr1|585282,Poptr1|587789,Poptr1|595729,Poptr1|109318,Poptr1|581761,Poptr1|99936,Poptr1|588307,Poptr  
1|580556,Poptr1|576760,Poptr1|584993,Poptr1|56848,Poptr1|584824,Poptr1|584814,Poptr1|592599,Poptr1|573830,  
Poptr1|565437,Poptr1|573512  
Poptr1|588095,Poptr1|594577,Poptr1|587051  
Poptr1|642986  
Poptr1|588046  
Poptr1|597676,Poptr1|581808,Poptr1|49258,Poptr1|586683,Poptr1|588017,Poptr1|597147,Poptr1|550439,  
Poptr1|72237,Poptr1|100794,Poptr1|585279,Poptr1|596818,Poptr1|576720,Poptr1|584361,Poptr1|583025,Poptr1|345  
859,Poptr1|48871,Poptr1|589233,Poptr1|584375,Poptr1|584068,Poptr1|568403,Poptr1|588042,Poptr1|580471,Poptr1|  
579735,Poptr1|103518,Poptr1|596032,Poptr1|583946,Poptr1|588414,Poptr1|61130,Poptr1|548645,Poptr1|585843,Pop  
tr1|102862,Poptr1|596505,Poptr1|585684  
Poptr1|99799,Poptr1|591466,Poptr1|587476,Poptr1|590562,Poptr1|585739,Poptr1|97652,Poptr1|587543,  
Poptr1|585182,Poptr1|691460,Poptr1|549309  
Poptr1|583726,Poptr1|583727  
Poptr1|595837  
Poptr1|589087  
Poptr1|590670  
Poptr1|348503  
AT4G32190.1 Poptr1|561913  
AT1G06530.1 Poptr1|551251,Poptr1|559470  
AT3G16000.1 Poptr1|548674  
AT5G27330.1,AT3G05130.1 Poptr1|680378  
AT2G32240.1 Poptr1|717340,Poptr1|701255  
AT3G58840.1  
AT1G05320.1  
AT1G03210.1,AT4G02850.1,AT4G02860.1 Poptr1|724280  
AT2G47540.1 Poptr1|552474  
AT1G54970.1,AT3G62680.1 Poptr1|348288,Poptr1|107058,Poptr1|572666  
AT4G02270.1  
AT1G49040.1 Poptr1|687760,Poptr1|700816  
Poptr1|106638,Poptr1|580285  
Poptr1|596406  
AT4G35280.1 Poptr1|556780,Poptr1|594999  
AT2G17180.1  
AT3G50670.1 Poptr1|686081  
Poptr1|679248  
Poptr1|593950  
AT3G22380.1 Poptr1|566265,Poptr1|696429  
Poptr1|551169,Poptr1|559558  
Poptr1|71964,Poptr1|592584,Poptr1|592674  
AT5G46550.1 Poptr1|568478,Poptr1|550095  
AT2G34900.1 Poptr1|353418  
AT3G01770.1,AT5G14270.1 Poptr1|57654,Poptr1|345997,Poptr1|64906  
AT5G10550.1,AT5G65630.1 Poptr1|642170,Poptr1|722527  
AT1G06230.1 Poptr1|574351  
AT3G52280.1  
AT5G63320.1  
AT5G63330.1



AT3G27260.1  
 AT1G73150.1,AT1G17790.1  
     Poptr1|642171  
     Poptr1|642381,Poptr1|660695  
 AT3G23900.1           Poptr1|597062,Poptr1|65060  
 AT3G57150.1           Poptr1|344116  
 AT5G14780.1           Poptr1|732388  
     Poptr1|593083,Poptr1|582841,Poptr1|552711,Poptr1|348551  
 AT1G28340.1           Poptr1|555769  
 AT1G25570.1           Poptr1|345241  
     Poptr1|671009  
     Poptr1|658936  
 AT1G51390.1,AT3G20970.1       Poptr1|655785,Poptr1|725449  
 AT5G66540.1           Poptr1|700935,Poptr1|345947  
 AT5G10630.1           Poptr1|583160  
 AT1G07930.1,AT1G07940.1,AT5G60390.1,AT1G07920.1  
     Poptr1|589403,Poptr1|655949,Poptr1|719935,Poptr1|659840,Poptr1|724917,Poptr1|563769,Poptr1|56756

6

AT1G18070.1           Poptr1|743925,Poptr1|571639  
 AT1G35550.1  
     Poptr1|737500  
     Poptr1|670300,Poptr1|674089  
     Poptr1|576658  
     Poptr1|567569  
     Poptr1|655950  
 AT2G47840.1           Poptr1|342068  
 AT5G55710.1           Poptr1|594871  
     Poptr1|580837  
 AT1G04950.1           Poptr1|688339  
     Poptr1|707589  
     Poptr1|552717,Poptr1|594367  
 AT5G27290.1           Poptr1|570911  
 AT1G54680.1  
     Poptr1|595534  
     Poptr1|594138,Poptr1|573207  
 AT3G07370.1           Poptr1|684144  
 AT3G54010.1           Poptr1|735662  
     Poptr1|653050  
 AT1G77800.1           Poptr1|347311,Poptr1|72404  
 AT1G65440.1           Poptr1|560322,Poptr1|734687  
 AT1G63210.1  
     Poptr1|62846  
 AT1G61700.1           Poptr1|675915,Poptr1|684938  
 AT1G11475.1  
     Poptr1|573351  
 AT3G46870.1           Poptr1|558010  
 AT1G62350.1           Poptr1|549389  
     Poptr1|649877,Poptr1|582482  
 AT2G35720.1           Poptr1|589857,Poptr1|553868  
     Poptr1|583685  
     Poptr1|594114  
 AT3G61180.1           Poptr1|572164,Poptr1|347933  
 AT1G15100.1,AT2G01150.1       Poptr1|354212,Poptr1|658830  
 AT1G68070.1           Poptr1|698157,Poptr1|686286  
 AT4G26580.1,AT5G55970.1       Poptr1|707730,Poptr1|728044  
 AT3G55530.1           Poptr1|682517,Poptr1|724669  
 AT2G04240.1           Poptr1|573130  
 AT1G63170.1,AT1G12760.1,AT4G11680.1  
 AT2G01735.1  
     Poptr1|642343  
 AT1G15740.1           Poptr1|60907  
     Poptr1|578853  
 AT4G32600.1           Poptr1|654072  
 AT1G80400.1  
 AT4G14070.1,AT3G23790.1       Poptr1|703885,Poptr1|65033  
     Poptr1|674999  
 AT2G24580.1           Poptr1|583126,Poptr1|737485  
 AT2G36590.1,AT3G55740.1,AT2G39890.1   Poptr1|353622,Poptr1|55506  
 AT5G23550.1           Poptr1|714561  
 AT5G24170.1           Poptr1|569529  
     Poptr1|593330  
     Poptr1|583975  
 AT5G37660.1           Poptr1|555981,Poptr1|552939  
 AT2G01660.1           Poptr1|726827,Poptr1|656963  
 AT1G70690.1  
 AT5G40780.1,AT1G48640.1       Poptr1|706915  
 AT1G25530.1           Poptr1|564504,Poptr1|698254  
 AT1G08230.1           Poptr1|686612,Poptr1|696980,Poptr1|563641  
 AT5G41800.1           Poptr1|343681  
 AT1G47670.1           Poptr1|689565  
 AT1G08233.1  
     Poptr1|64904

Poptr1|55013  
Poptr1|567731  
Poptr1|594845  
Poptr1|567730  
Poptr1|63443  
Poptr1|583794,Poptr1|556701,Poptr1|342132  
Poptr1|573269,Poptr1|573266,Poptr1|546294  
Poptr1|652182  
Poptr1|556700  
AT1G04510.1,AT2G33340.1 Poptr1|565819,Poptr1|696354  
AT4G03020.1 Poptr1|572777  
Poptr1|696276  
AT2G40130.2 Poptr1|656255  
AT2G29970.1 Poptr1|557918,Poptr1|64251  
AT1G07200.1  
Poptr1|659508,Poptr1|656256  
AT2G38460.1,AT5G03570.1 Poptr1|577096  
Poptr1|668139  
Poptr1|577095  
Poptr1|668140  
Poptr1|734252  
AT1G13740.1 Poptr1|566923,Poptr1|353938  
AT1G69260.1  
Poptr1|566924  
AT3G55040.1 Poptr1|576631,Poptr1|353461  
AT5G02790.1,AT5G02780.1  
AT1G54350.1 Poptr1|55428  
AT4G09980.1 Poptr1|728888  
Poptr1|734216  
Poptr1|734215  
Poptr1|667065  
Poptr1|667064  
AT5G55310.1,AT5G55300.1 Poptr1|49372,Poptr1|568579  
AT3G47770.1,AT3G47780.1,AT3G47790.1,AT3G47740.1,AT5G61700.1,AT3G47750.1,AT3G47760.1  
Poptr1|345893,Poptr1|744140  
AT5G61730.1,AT3G47730.1,AT5G61690.1 Poptr1|581361,Poptr1|699459  
AT2G41700.1 Poptr1|695545  
AT5G61740.1  
Poptr1|98271  
Poptr1|108982  
AT5G63960.1 Poptr1|71550  
AT4G18930.1 Poptr1|568493,Poptr1|707098,Poptr1|584264  
AT4G18940.1  
AT3G02160.1,AT5G15570.1 Poptr1|589467,Poptr1|545957,Poptr1|577762  
AT1G06210.1 Poptr1|710684  
AT5G16880.1 Poptr1|573860,Poptr1|596931  
Poptr1|715183  
AT1G07730.2,AT2G28670.1 Poptr1|656022  
Poptr1|567497  
AT4G11970.1 Poptr1|709514  
AT1G30460.1 Poptr1|65410,Poptr1|55839  
AT2G32080.1 Poptr1|683525  
Poptr1|647415,Poptr1|571238,Poptr1|571239  
AT3G53710.1,AT2G37550.1 Poptr1|576748,Poptr1|685752  
AT3G23990.1 Poptr1|554803,Poptr1|640006  
AT3G13470.1,AT1G55490.1 Poptr1|62674,Poptr1|712746  
AT2G28000.1 Poptr1|741966,Poptr1|558284  
AT5G18820.1 Poptr1|575628  
AT2G33210.1  
AT3G13860.1  
AT1G26230.1  
AT5G56500.2  
Poptr1|684132  
Poptr1|104520  
Poptr1|699240  
Poptr1|594270,Poptr1|594269  
Poptr1|597443,Poptr1|679443  
Poptr1|594271  
AT5G46750.1,AT4G17890.1 Poptr1|590013,Poptr1|48146  
AT2G35210.1  
AT5G08190.1,AT5G23090.1 Poptr1|680893,Poptr1|699492  
AT5G23490.1,AT5G08440.1 Poptr1|714534  
AT5G23510.1  
Poptr1|571362  
AT1G11860.1 Poptr1|568049,Poptr1|705169  
Poptr1|585293  
AT4G12130.1 Poptr1|671187  
Poptr1|656015  
Poptr1|583089  
Poptr1|671186  
Poptr1|671185  
AT5G25340.1 Poptr1|352935

AT3G07860.1 Poptr1|346626  
 AT1G80060.1  
 AT4G02840.1 Poptr1|714945,Poptr1|681990  
 AT3G07590.1  
 AT2G04030.1 Poptr1|564455,Poptr1|687208  
 AT3G07770.1 Poptr1|573079  
 AT4G24190.1 Poptr1|685443  
 AT5G56010.1,AT5G56000.1,AT5G56030.1 Poptr1|550613  
 AT5G52640.1 Poptr1|556104,Poptr1|592912  
 Poptr1|586939  
 Poptr1|685884,Poptr1|691780,Poptr1|582316  
 Poptr1|582579  
 Poptr1|577101  
 Poptr1|577646,Poptr1|350270  
 AT5G47140.1,AT4G17570.1 Poptr1|589916,Poptr1|580168  
 AT1G79880.1,AT4G32720.1 Poptr1|717953,Poptr1|668935  
 AT4G35890.1 Poptr1|696002,Poptr1|593806  
 AT5G66100.1  
 Poptr1|694872  
 AT3G56570.1 Poptr1|556300  
 AT1G76080.1 Poptr1|652144  
 Poptr1|550830  
 AT1G31200.1,AT1G10155.1  
 Poptr1|586754,Poptr1|587951,Poptr1|575600,Poptr1|705053,Poptr1|575601,Poptr1|580056  
 Poptr1|747859  
 AT4G27040.1 Poptr1|56821  
 AT3G31960.1  
 Poptr1|569117,Poptr1|569115  
 Poptr1|569118  
 AT3G08020.1 Poptr1|557789  
 AT3G52100.1  
 Poptr1|641346  
 AT1G21780.1 Poptr1|347243,Poptr1|72466  
 AT1G55760.1 Poptr1|708147  
 AT5G13550.1,AT3G12520.1 Poptr1|724813,Poptr1|686507  
 AT5G10180.1 Poptr1|51732,Poptr1|53195  
 AT1G77990.1 Poptr1|692680  
 AT5G19600.1 Poptr1|690402  
 AT3G15990.1 Poptr1|548672,Poptr1|685024  
 AT1G23090.1 Poptr1|345306,Poptr1|726870  
 AT1G22150.1,AT1G78000.1 Poptr1|710534,Poptr1|72375  
 AT3G51895.1 Poptr1|72795,Poptr1|342288,Poptr1|55109  
 AT4G08620.1  
 AT4G02700.1  
 Poptr1|597192  
 Poptr1|643492  
 Poptr1|561009  
 Poptr1|354505  
 Poptr1|586701  
 AT2G41370.1 Poptr1|576209,Poptr1|351445  
 AT3G57130.1  
 AT4G21070.1 Poptr1|550126  
 AT1G04020.1 Poptr1|349134  
 AT4G31300.2 Poptr1|584580,Poptr1|560689  
 AT3G05710.2,AT5G26980.1 Poptr1|744587  
 Poptr1|348302  
 AT1G78420.1,AT1G17145.1 Poptr1|568608,Poptr1|550313  
 AT4G14440.1,AT4G14430.1 Poptr1|566113  
 Poptr1|108662  
 AT3G18000.1,AT1G48600.2 Poptr1|699523  
 AT1G73600.1  
 Poptr1|666298  
 Poptr1|355491  
 AT3G63410.1 Poptr1|551117,Poptr1|696389,Poptr1|559613  
 AT5G10720.1 Poptr1|578360,Poptr1|353075  
 AT5G10680.1  
 AT5G46210.1 Poptr1|694099,Poptr1|586119  
 AT1G26830.1 Poptr1|566300,Poptr1|720255  
 AT4G02570.1 Poptr1|725818,Poptr1|704369  
 AT4G12100.1  
 AT3G46910.1  
 AT1G69670.1  
 AT1G59800.1,AT1G59790.1  
 AT1G02980.1  
 Poptr1|584399  
 Poptr1|570819  
 Poptr1|680491  
 Poptr1|711781,Poptr1|690137  
 Poptr1|581856,Poptr1|97724,Poptr1|581855  
 Poptr1|588083  
 Poptr1|581789  
 AT3G22410.1 Poptr1|55132,Poptr1|564832

AT1G05370.1  
AT1G65540.1 Poptr1|353767,Poptr1|55436  
Poptr1|75292  
AT5G62860.1,AT3G48020.1 Poptr1|666443,Poptr1|570068,Poptr1|678899  
AT3G01430.1 Poptr1|590107,Poptr1|554112  
AT5G13410.1 Poptr1|640121  
Poptr1|350531  
AT3G23940.1 Poptr1|554826,Poptr1|683580  
Poptr1|590193  
AT4G34090.1 Poptr1|557406  
AT2G23370.1  
Poptr1|696021  
Poptr1|642005  
AT5G13090.1 Poptr1|48585,Poptr1|684791  
AT1G12020.1 Poptr1|660322  
AT1G24270.1  
Poptr1|570294,Poptr1|575387  
AT1G18460.1,AT1G73920.1 Poptr1|699483  
Poptr1|673915  
AT4G11820.2 Poptr1|693464,Poptr1|548531  
Poptr1|350156  
AT5G07670.1 Poptr1|554170,Poptr1|739942  
AT5G51380.1,AT5G51370.2  
Poptr1|347816,Poptr1|59372  
AT2G23540.1 Poptr1|563046  
AT5G45670.1,AT4G18970.1 Poptr1|568486,Poptr1|545109  
AT5G40990.1,AT3G14225.1,AT1G53990.1,AT1G53940.1  
Poptr1|699914,Poptr1|692161,Poptr1|545497,Poptr1|349679,Poptr1|348738,Poptr1|349678  
AT4G10950.1 Poptr1|554504  
AT2G24560.1,AT2G30220.1,AT2G31540.1,AT1G58430.1,AT2G30310.1 Poptr1|353753,Poptr1|56886  
AT4G26790.1 Poptr1|52074,Poptr1|552727,Poptr1|573030,Poptr1|573029  
AT5G45950.1 Poptr1|713889  
AT1G71120.1 Poptr1|656882  
AT1G33811.1 Poptr1|592340  
AT4G16230.1 Poptr1|345192  
AT3G16370.1 Poptr1|691304  
AT1G71250.1 Poptr1|581024  
AT5G22810.1 Poptr1|54308  
AT1G75900.1 Poptr1|550852,Poptr1|694866  
AT1G71691.2 Poptr1|740794,Poptr1|574209  
AT1G74460.1 Poptr1|355757  
AT3G04290.1 Poptr1|573773,Poptr1|738296,Poptr1|571136,Poptr1|738313,Poptr1|738312  
AT5G45960.1 Poptr1|586077,Poptr1|586078  
AT5G55050.1 Poptr1|727976  
AT3G09930.1,AT5G03610.1 Poptr1|744673  
AT5G37690.1 Poptr1|348780,Poptr1|555973  
AT4G28780.1 Poptr1|553265  
AT5G03810.1,AT5G03820.1 Poptr1|589543  
AT5G41890.1,AT3G50400.1  
AT2G19060.1,AT2G19010.1  
AT1G29670.1,AT1G29660.1  
AT1G54000.1,AT1G54020.2,AT1G54030.1,AT1G54010.1  
AT1G53920.1  
AT2G31550.1  
AT2G40250.1  
AT1G06990.1  
AT2G42990.1  
AT2G04570.1  
AT4G16220.1  
AT5G15720.1  
AT5G08460.1  
AT1G23500.1,AT1G75930.1,AT1G75920.1,AT1G75910.1,AT5G63170.1,AT1G73610.1  
AT1G20130.1  
AT3G43570.1,AT1G59030.1,AT3G43550.1,AT1G58480.1,AT3G14820.1,AT1G58725.1,AT1G59406.1  
AT1G20120.1  
AT5G42170.1  
AT1G75890.1,AT1G75880.1  
AT5G42160.1  
AT5G18430.1  
AT5G33370.1  
AT5G03600.1  
AT3G53100.1  
Poptr1|354020,Poptr1|581775  
Poptr1|584678  
Poptr1|584092,Poptr1|674605,Poptr1|583414  
Poptr1|670630,Poptr1|591620,Poptr1|570488,Poptr1|704069,Poptr1|584093,Poptr1|727893  
Poptr1|580498  
Poptr1|747939  
Poptr1|552904,Poptr1|348741  
Poptr1|669991,Poptr1|670197  
Poptr1|552926,Poptr1|595982  
Poptr1|75354,Poptr1|705380

Poptr1|107228,Poptr1|545500  
Poptr1|577803  
Poptr1|577804  
Poptr1|592403  
Poptr1|591231  
Poptr1|581149  
Poptr1|656881  
Poptr1|585589  
Poptr1|640949,Poptr1|561016  
Poptr1|590925  
Poptr1|640950  
Poptr1|577467  
Poptr1|546290,Poptr1|356807  
Poptr1|580293  
AT1G17440.1 Poptr1|63673,Poptr1|349460  
AT3G10070.1 Poptr1|560743  
AT3G27570.1,AT5G40510.1 Poptr1|706790  
AT4G26620.1 Poptr1|684043  
AT5G55900.1  
Poptr1|583351  
AT5G07350.1,AT5G61780.1 Poptr1|688569,Poptr1|570388  
AT1G76440.1 Poptr1|641168  
AT1G54840.1 Poptr1|342095  
AT1G54850.1 Poptr1|570864  
AT1G20870.1  
Poptr1|570866  
AT2G26890.1 Poptr1|737553  
Poptr1|669275  
Poptr1|737555  
Poptr1|669276  
AT2G19520.1 Poptr1|98323,Poptr1|589194  
AT4G29730.1  
Poptr1|592758  
Poptr1|653315  
AT1G52155.1 Poptr1|64050  
AT5G13640.1 Poptr1|548593,Poptr1|553633  
AT2G38370.1,AT3G51720.1 Poptr1|734286  
AT3G56270.1,AT2G40480.1  
AT4G12050.1,AT4G22810.1 Poptr1|63655,Poptr1|347874,Poptr1|572119,Poptr1|554259  
AT4G17800.1 Poptr1|580080,Poptr1|590005  
AT5G49700.1 Poptr1|347462,Poptr1|559014  
AT2G42940.1 Poptr1|347047,Poptr1|559480  
AT4G14465.1 Poptr1|571077,Poptr1|564937  
AT2G45430.1  
AT3G60870.1  
AT2G35270.1  
AT1G14490.1  
AT3G04570.1  
Poptr1|658099  
Poptr1|557689,Poptr1|64632  
Poptr1|566118  
AT5G49930.1 Poptr1|353987  
Poptr1|353988  
Poptr1|566877  
Poptr1|566876  
AT5G14280.1 Poptr1|49194  
AT3G25950.1 Poptr1|345497  
AT3G27270.1  
Poptr1|565910  
Poptr1|566335  
AT5G10330.1,AT1G71920.1 Poptr1|740661  
AT4G30860.1 Poptr1|578696  
AT2G44150.1 Poptr1|585029  
AT3G59960.1  
Poptr1|562064  
AT5G11770.1 Poptr1|561685  
AT4G14910.1,AT3G22425.2 Poptr1|698070,Poptr1|657160  
Poptr1|579056  
AT4G17310.1 Poptr1|589737,Poptr1|64920  
AT5G11630.1 Poptr1|344662  
AT5G47455.4  
AT1G70350.1  
AT4G33350.1 Poptr1|644131,Poptr1|703112  
AT3G23710.1 Poptr1|553094  
AT5G61220.1 Poptr1|697420,Poptr1|678987  
Poptr1|555860  
AT3G13960.1 Poptr1|589274,Poptr1|107551,Poptr1|582927,Poptr1|349453,Poptr1|548577  
Poptr1|574006,Poptr1|574004  
AT1G53290.1,AT3G14960.1 Poptr1|690331,Poptr1|660873  
AT1G77810.1 Poptr1|559172,Poptr1|692692  
AT5G53340.1 Poptr1|586581  
AT1G05170.1,AT2G32430.1 Poptr1|343034,Poptr1|732233

AT2G26100.1 Poptr1|561662  
AT4G32120.1,AT2G25300.1 Poptr1|352954,Poptr1|58575  
AT1G32930.1 Poptr1|550460,Poptr1|727295  
AT1G22015.1  
AT4G26940.1  
AT1G11730.1  
AT1G33430.1  
Poptr1|583225  
Poptr1|684858  
Poptr1|63460  
Poptr1|546339  
Poptr1|668818  
Poptr1|596692  
AT5G17660.1 Poptr1|730135  
Poptr1|594726  
AT4G27020.1,AT5G54870.1 Poptr1|688054,Poptr1|569120  
AT1G70160.1 Poptr1|686149  
AT1G64790.1 Poptr1|573770  
Poptr1|738290  
Poptr1|573768  
AT1G79060.1 Poptr1|71861,Poptr1|562889  
AT3G12970.1,AT1G56020.1  
AT4G09650.1 Poptr1|574320  
Poptr1|572432  
AT4G14570.1 Poptr1|657231  
AT3G21570.1 Poptr1|696272,Poptr1|697847,Poptr1|561953  
AT4G02040.1  
AT2G30920.1 Poptr1|572336  
Poptr1|582372,Poptr1|582369,Poptr1|573280  
AT2G33540.1 Poptr1|708815  
Poptr1|646986  
AT2G18040.1 Poptr1|696157  
Poptr1|589139  
Poptr1|107114  
AT2G15560.1 Poptr1|557397,Poptr1|671445  
AT4G30690.1,AT2G24060.1 Poptr1|669557  
Poptr1|717828  
AT4G29330.1 Poptr1|685680  
AT5G51290.1 Poptr1|703821  
Poptr1|579061  
AT3G08740.1 Poptr1|47829  
AT2G16530.1,AT1G72590.1 Poptr1|546148,Poptr1|557164  
AT3G43840.1  
Poptr1|585722  
AT5G16010.1 Poptr1|698774,Poptr1|697019,Poptr1|748570,Poptr1|563512  
Poptr1|353192  
Poptr1|563510  
AT5G58720.1 Poptr1|557922  
AT3G15390.1 Poptr1|580890,Poptr1|545311,Poptr1|579484  
Poptr1|557923  
AT4G03520.1,AT1G03680.1  
Poptr1|681588,Poptr1|582703,Poptr1|680574,Poptr1|574399,Poptr1|677506,Poptr1|568915,Poptr1|67008  
3,Poptr1|597041  
AT1G50320.1 Poptr1|654964  
AT3G06730.1 Poptr1|690862  
AT1G76760.1,AT1G43560.1 Poptr1|342356,Poptr1|651576  
AT2G15570.1 Poptr1|722208  
AT3G15360.1  
AT4G12170.1  
Poptr1|684531,Poptr1|595378  
Poptr1|584604  
AT4G21660.1 Poptr1|55761,Poptr1|545048  
AT1G11520.1  
AT5G42620.1 Poptr1|591836  
Poptr1|347717  
AT3G21720.1 Poptr1|741351,Poptr1|685937  
Poptr1|589044  
AT2G27460.1 Poptr1|703555,Poptr1|697075  
AT3G58660.1,AT2G42650.1 Poptr1|570417  
AT1G06380.1  
AT2G02390.3,AT2G02380.1 Poptr1|742620  
Poptr1|56973  
Poptr1|583022  
Poptr1|103587  
AT4G11570.1 Poptr1|548466,Poptr1|554365  
AT4G30330.1,AT2G18740.1 Poptr1|673808,Poptr1|689142  
AT1G12250.1 Poptr1|554217  
Poptr1|581226  
AT3G14160.1 Poptr1|553802  
AT3G14140.1  
AT1G15020.2,AT2G01270.1 Poptr1|345290,Poptr1|687169  
AT1G63980.1 Poptr1|554418

AT1G17080.1 Poptr1|642408  
AT3G14595.1  
AT1G29970.1  
AT1G53560.1  
AT4G14690.1,AT3G22840.1 Poptr1|583545,Poptr1|720964,Poptr1|564883  
AT2G26990.1 Poptr1|583397,Poptr1|558178  
Poptr1|104649  
AT1G05900.2,AT2G31450.1 Poptr1|75414  
AT3G21300.1 Poptr1|580256  
AT1G22300.1 Poptr1|651278,Poptr1|684476  
AT5G65430.1,AT5G10450.1 Poptr1|643848,Poptr1|682144  
AT5G16050.1,AT3G02520.1 Poptr1|670888  
AT2G42590.3 Poptr1|568816,Poptr1|672511  
AT1G26480.1 Poptr1|698372,Poptr1|656511  
AT1G35160.1,AT4G09000.1,AT1G78300.1 Poptr1|551603,Poptr1|559069  
AT1G22290.1  
AT1G34760.1  
AT1G78220.1  
AT5G38480.1  
AT2G10450.1  
Poptr1|559174  
Poptr1|577955  
Poptr1|346316  
Poptr1|576897  
AT5G44320.1,AT4G20980.1 Poptr1|545291,Poptr1|670999  
AT2G33800.1 Poptr1|580919,Poptr1|713937  
AT1G70900.1,AT1G23110.1 Poptr1|687155,Poptr1|345309  
AT4G39790.1 Poptr1|71662  
Poptr1|654805  
Poptr1|654804  
AT5G07940.1,AT5G07970.1,AT5G07980.1 Poptr1|596442  
AT3G29385.1  
Poptr1|661800,Poptr1|680857,Poptr1|661849  
AT1G09760.1 Poptr1|548145,Poptr1|711659  
AT1G09280.1 Poptr1|581675  
Poptr1|570699  
AT1G50950.1,AT3G20560.1 Poptr1|571502,Poptr1|56015  
AT4G27080.1  
AT3G60440.1,AT3G60450.1,AT3G60430.1,AT3G60420.1 Poptr1|551987,Poptr1|59381  
AT1G62760.1 Poptr1|575669,Poptr1|646475,Poptr1|733981,Poptr1|97349,Poptr1|575668  
AT4G25250.1,AT5G51520.1 Poptr1|570589,Poptr1|575672,Poptr1|575676  
AT5G20740.1 Poptr1|589329  
AT4G12390.1,AT1G62770.1 Poptr1|554227,Poptr1|570588  
AT2G01610.1,AT1G14890.1 Poptr1|564644,Poptr1|726835  
AT2G47670.1,AT3G62820.1 Poptr1|664439  
AT4G00080.1 Poptr1|572085,Poptr1|347839  
AT3G47670.1 Poptr1|548500,Poptr1|554326  
AT5G62360.1  
AT5G62340.1,AT3G47380.1,AT5G62350.1  
AT4G25260.1  
AT1G23205.1,AT1G70720.1  
Poptr1|581218  
Poptr1|552442  
AT4G37670.2,AT2G22910.1 Poptr1|730706,Poptr1|718045  
Poptr1|582654  
AT3G57560.1 Poptr1|586368,Poptr1|679371,Poptr1|672643  
Poptr1|679312  
AT3G57090.1 Poptr1|701329,Poptr1|652627  
Poptr1|557911  
AT1G76850.1,AT1G21170.1 Poptr1|347131,Poptr1|694623  
AT5G47480.1,AT5G47490.1 Poptr1|356467,Poptr1|349734  
AT5G46160.1 Poptr1|697862  
AT1G17560.1  
ATCG00780.1  
Poptr1|676594  
AT1G72430.1,AT1G17345.1 Poptr1|673230,Poptr1|553808  
AT3G12360.1 Poptr1|563828  
AT2G24600.3,AT1G10340.1,AT1G34050.1 Poptr1|64052  
AT2G01680.1 Poptr1|566441,Poptr1|696500  
AT1G07710.1 Poptr1|71579,Poptr1|75665,Poptr1|558470  
AT5G54710.1,AT5G50140.1  
AT5G02620.1  
AT5G60070.1  
Poptr1|352537  
Poptr1|724833  
Poptr1|344561,Poptr1|735408  
Poptr1|654709  
AT1G09300.1 Poptr1|570698  
Poptr1|584347  
Poptr1|583708  
AT3G51800.2 Poptr1|577003,Poptr1|560930  
Poptr1|577797

AT1G23710.1,AT1G70420.1 Poptr1|354508,Poptr1|570091,Poptr1|573176,Poptr1|557383  
AT5G62770.1  
AT3G27880.1  
Poptr1|578648  
AT5G14580.1 Poptr1|64775  
AT3G04720.1 Poptr1|59936,Poptr1|571046,Poptr1|571045  
Poptr1|680266,Poptr1|662933  
AT1G08490.1 Poptr1|697480  
AT3G10730.1,AT5G04990.1 Poptr1|344831,Poptr1|55667  
AT2G19800.1 Poptr1|672460  
AT1G14520.1 Poptr1|354387  
AT4G26260.1,AT5G56640.1  
Poptr1|583859  
AT2G35795.1 Poptr1|563778  
Poptr1|739342  
AT3G10260.3 Poptr1|684572,Poptr1|714925  
AT3G19460.1 Poptr1|649620  
AT3G54120.1 Poptr1|701581  
AT4G11220.1,AT4G23630.1,AT5G41600.1 Poptr1|572319,Poptr1|646681,Poptr1|692379,Poptr1|681779  
AT3G18260.1 Poptr1|699508,Poptr1|733010  
AT2G23640.1 Poptr1|696045  
AT3G10915.3 Poptr1|665630  
AT2G15280.1  
AT1G64090.1  
AT3G61560.2,AT2G46170.1  
AT4G01230.1  
AT2G01240.1  
Poptr1|592589,Poptr1|704087,Poptr1|661418  
Poptr1|354200  
AT5G63350.1,AT3G48510.1,AT5G50360.1 Poptr1|570218,Poptr1|575313  
AT5G40800.1,AT3G27250.1 Poptr1|64914  
AT5G40790.1  
AT5G10920.1 Poptr1|684458  
Poptr1|108844  
AT3G27320.1,AT5G14310.1 Poptr1|565090,Poptr1|565089  
Poptr1|658201  
Poptr1|658200  
Poptr1|351452  
AT3G21710.2 Poptr1|552802,Poptr1|572946,Poptr1|661102  
AT1G50930.1,AT3G20557.1  
Poptr1|571503  
AT4G01050.1 Poptr1|572375,Poptr1|684317  
AT3G25480.1 Poptr1|553134  
AT1G18800.1,AT1G74560.2 Poptr1|545745,Poptr1|577612  
Poptr1|671320,Poptr1|661875  
AT2G23690.1,AT4G37240.1 Poptr1|719402,Poptr1|651016  
AT5G66580.1,AT3G50800.1  
Poptr1|556424  
AT4G22740.1 Poptr1|704235,Poptr1|350108  
AT2G45380.1 Poptr1|572103  
Poptr1|347854  
AT4G08400.1,AT1G26240.1,AT4G08380.1,AT1G23720.1,AT4G08370.1,AT3G28550.1,AT1G26250.1,AT5G06630.1,AT2G24980.1,AT4G13390.1 Poptr1|587814  
AT5G35190.1,AT4G13340.1,AT1G79480.1,AT4G11430.1,AT5G59170.1,AT3G19320.1,AT1G21310.1,AT2G27380.1,AT4G15160.1,AT4G06744.1,AT5G57070.1,AT2G43150.1,AT4G08410.1,AT4G28380.1,AT4G27850.1,AT3G22120.1,AT2G15880.1,AT3G22070.1,AT5G14920.1,AT1G76930.1,AT1G62440.1,AT5G48920.1,AT4G00890.1,AT5G15780.1,AT4G22470.1,AT3G20850.1,AT4G38770.1,AT5G11990.1,AT1G61080.1,AT3G22800.1,AT1G54215.1,AT4G18670.1,AT5G19810.1,AT3G24480.1,AT1G72790.1,AT5G06640.1,AT2G27390.1,AT5G49080.1,AT3G54580.1,AT4G33970.1,AT3G50580.1,AT3G19020.1,AT3G54590.1,AT1G49490.1,AT1G12040.1  
Poptr1|665288,Poptr1|58524,Poptr1|72260,Poptr1|99654,Poptr1|71500,Poptr1|643502,Poptr1|351732,Poptr1|577341,Poptr1|557414,Poptr1|549928,Poptr1|694617,Poptr1|647247,Poptr1|662096,Poptr1|566202,Poptr1|669289,Poptr1|99210,Poptr1|597100,Poptr1|591994,Poptr1|54485,Poptr1|706691,Poptr1|566097,Poptr1|553619,Poptr1|564167,Poptr1|675176,Poptr1|581245,Poptr1|594426,Poptr1|562325,Poptr1|562444,Poptr1|675187,Poptr1|679425,Poptr1|734547,Poptr1|654057,Poptr1|75306,Poptr1|564868,Poptr1|585226,Poptr1|697772  
AT1G70990.1,AT1G23040.1 Poptr1|566504,Poptr1|564605  
AT1G12810.1  
AT5G43770.1  
AT5G25550.1  
AT1G15825.1  
AT5G26070.1,AT5G19800.1,AT5G26080.1  
AT3G43583.1  
AT1G72600.1  
AT1G02405.1  
Poptr1|561029  
Poptr1|669671  
Poptr1|576227  
Poptr1|551356  
Poptr1|555540  
Poptr1|594658  
Poptr1|675464  
Poptr1|565347  
Poptr1|108032



AT4G30890.1 Poptr1|711964  
 AT3G14400.1 Poptr1|568834,Poptr1|98381  
 AT5G57990.1 Poptr1|578750  
 AT4G31670.1,AT2G24640.1 Poptr1|353076  
 AT4G24560.1 Poptr1|694482,Poptr1|551649  
 AT1G17110.1 Poptr1|691871,Poptr1|568600  
 AT4G17895.1,AT5G46740.1 Poptr1|590014,Poptr1|580069  
 AT5G65450.1  
     Poptr1|352331  
     Poptr1|578363  
 AT1G16560.1 Poptr1|719127  
     Poptr1|575753,Poptr1|570518  
 AT4G08550.1,AT3G11920.1 Poptr1|643701  
     Poptr1|726714  
     Poptr1|564762,Poptr1|566346  
 AT5G58060.1 Poptr1|738035,Poptr1|561300  
 AT5G58180.1  
 AT4G36970.1 Poptr1|59466,Poptr1|342601,Poptr1|72003  
 AT1G45207.2  
     Poptr1|562968,Poptr1|596190  
 AT2G42140.1,AT3G58000.1 Poptr1|576261,Poptr1|561257,Poptr1|650341  
 AT3G60090.1,AT2G44340.1  
 AT2G20000.1 Poptr1|689111,Poptr1|100496  
 AT3G16320.1  
     Poptr1|577473  
 AT2G21530.1 Poptr1|697096,Poptr1|703528  
 AT5G59080.1 Poptr1|650211,Poptr1|560836,Poptr1|656162  
 AT5G02020.1  
 AT5G05965.1,AT3G55646.1  
 AT2G39855.1  
 AT3G55610.1,AT2G39800.1 Poptr1|724615,Poptr1|686471  
 AT3G03190.1,AT5G17220.1 Poptr1|689660  
 AT1G02920.1,AT2G02930.1,AT4G02520.1,AT1G02930.1 Poptr1|730648,Poptr1|573435  
 AT3G62760.1 Poptr1|688399  
 AT2G30860.1,AT2G30870.1  
 AT1G02940.1,AT1G02950.2  
 AT1G49860.1  
 AT2G47730.1  
     Poptr1|550819,Poptr1|684666  
 AT1G28395.1 Poptr1|647942,Poptr1|580943,Poptr1|677572  
 AT2G20585.1 Poptr1|654393,Poptr1|594642  
 AT2G37660.1 Poptr1|560773  
 AT5G02240.1  
 AT5G19500.1 Poptr1|63813  
     Poptr1|584095  
 AT2G22425.1,AT4G40042.1 Poptr1|720992,Poptr1|658139  
 AT3G45590.1,AT5G60230.2 Poptr1|557107  
 AT3G45577.1  
 AT5G49460.1,AT3G06650.1 Poptr1|723928,Poptr1|656642  
     Poptr1|589728  
     Poptr1|672087  
     Poptr1|580236  
 AT3G45890.1 Poptr1|691310  
     Poptr1|592723  
 AT1G53580.1 Poptr1|65623  
     Poptr1|694666  
 AT2G26200.1 Poptr1|344608  
     Poptr1|577876  
 AT1G02150.1 Poptr1|347773,Poptr1|591758  
 AT4G21705.1 Poptr1|555809,Poptr1|580892  
 AT5G27460.1 Poptr1|72255  
 AT5G09450.1 Poptr1|701745  
 AT2G20710.1 Poptr1|98191,Poptr1|582700  
 AT1G60770.1 Poptr1|704775  
 AT4G02820.1 Poptr1|559545  
 AT4G01990.1,AT1G02370.1 Poptr1|348362  
 AT3G11380.1,AT1G28000.1,AT1G28020.1,AT1G43010.1  
 AT3G11350.1  
     Poptr1|597386  
     Poptr1|582699,Poptr1|576429  
     Poptr1|576428  
     Poptr1|98188  
     Poptr1|582697  
     Poptr1|580894  
     Poptr1|669301  
     Poptr1|578456  
     Poptr1|586180  
 AT3G05550.1,AT5G27760.1 Poptr1|729527,Poptr1|704402  
     Poptr1|574089  
     Poptr1|591388  
 AT1G72280.1 Poptr1|65687,Poptr1|569143  
 AT2G38960.2

AT3G27160.1 Poptr1|549690  
AT5G63300.1 Poptr1|570201  
AT2G45200.1 Poptr1|342686,Poptr1|572078  
AT3G44890.1 Poptr1|584454  
Poptr1|558328  
AT4G36480.1 Poptr1|345647,Poptr1|97021  
Poptr1|672053  
AT1G58080.1,AT1G09795.1 Poptr1|596721  
Poptr1|665627  
Poptr1|574105  
AT3G06700.1,AT3G06680.1 Poptr1|656674,Poptr1|659050  
Poptr1|342916  
AT1G17130.1 Poptr1|728078  
AT2G32050.1,AT3G43250.1  
Poptr1|707808  
AT3G62580.1 Poptr1|684263  
AT1G76100.1,AT1G20340.1 Poptr1|682018,Poptr1|652151  
AT1G52330.1 Poptr1|349557,Poptr1|63791  
AT4G13270.1 Poptr1|690404  
AT3G05545.1 Poptr1|690224,Poptr1|570782  
AT2G15260.1  
AT2G47700.1  
AT4G13490.1  
AT5G10310.1 Poptr1|562574,Poptr1|558516  
Poptr1|592800  
Poptr1|578944  
AT5G50100.1 Poptr1|666419  
AT3G49560.1,AT5G24650.1 Poptr1|700741,Poptr1|661644  
AT2G18710.1 Poptr1|578655,Poptr1|561405  
Poptr1|680784  
Poptr1|585649  
AT1G61050.1 Poptr1|555547,Poptr1|568254  
AT3G25585.1,AT1G13560.1 Poptr1|720296  
Poptr1|698275  
AT4G34160.1 Poptr1|696006,Poptr1|549935,Poptr1|686739  
AT5G02110.1 Poptr1|560791  
AT2G22490.1 Poptr1|51905,Poptr1|347448  
AT4G03270.1 Poptr1|544980,Poptr1|571816,Poptr1|574576,Poptr1|568319  
AT1G70210.1 Poptr1|698118,Poptr1|564776  
AT4G37630.1 Poptr1|553971  
AT5G67260.1  
AT5G65420.1,AT5G10440.1  
Poptr1|347592  
Poptr1|703148,Poptr1|347626  
Poptr1|649698,Poptr1|642110  
Poptr1|568322  
Poptr1|76492  
Poptr1|572042  
AT4G17610.1 Poptr1|589922  
Poptr1|589923  
AT1G80180.1,AT1G15400.1 Poptr1|553642,Poptr1|640631  
AT5G20100.1  
AT2G22230.1,AT5G10160.1 Poptr1|553441  
Poptr1|640779  
AT4G00860.1,AT1G01170.1 Poptr1|695534,Poptr1|667459  
AT2G40000.1,AT3G55840.1 Poptr1|345031,Poptr1|724507  
AT3G02790.1,AT5G16470.1 Poptr1|702483,Poptr1|742712  
AT1G71260.1 Poptr1|553773  
AT1G14410.1,AT2G02740.1 Poptr1|658581,Poptr1|564801  
AT5G15610.1,AT3G02200.2 Poptr1|736462,Poptr1|712843  
AT5G45620.1,AT4G19006.1 Poptr1|646311,Poptr1|689501  
AT1G69526.2,AT1G69523.1 Poptr1|696710  
AT1G69520.1  
Poptr1|587336  
AT2G35630.1 Poptr1|550419  
AT3G28155.1  
AT3G07690.1 Poptr1|351480,Poptr1|693184,Poptr1|746929  
AT2G41540.1  
AT2G40690.1 Poptr1|56840  
AT2G38840.1 Poptr1|715064  
Poptr1|684591  
Poptr1|710126  
AT1G51560.1,AT3G21140.1 Poptr1|698742  
Poptr1|563453  
AT5G03880.1 Poptr1|561503  
AT4G10000.1  
AT3G15640.1,AT1G80230.1 Poptr1|712484,Poptr1|548614  
AT1G52710.1  
AT5G09960.1,AT5G64850.1 Poptr1|654885,Poptr1|46718  
AT5G19473.1  
AT4G25240.1,AT5G51480.1 Poptr1|570599,Poptr1|575660

AT4G12420.1 Poptr1|646462,Poptr1|704255  
AT5G66920.1 Poptr1|719331  
AT5G48450.1 Poptr1|573208  
AT1G75790.1 Poptr1|550874  
AT1G55560.1,AT3G13400.1,AT1G55570.1,AT3G13390.1 Poptr1|547564,Poptr1|547563,Poptr1|555163  
AT1G41830.1,AT1G76160.1 Poptr1|559908,Poptr1|710957  
AT4G22010.1 Poptr1|588573  
AT2G23630.1,AT4G37160.1 Poptr1|53328  
AT1G21860.1,AT1G21850.1  
Poptr1|104545  
Poptr1|563671  
Poptr1|563670  
Poptr1|567683  
Poptr1|556695  
Poptr1|348614  
AT1G48380.1 Poptr1|555564  
Poptr1|585858,Poptr1|585856,Poptr1|592943  
AT2G29570.1,AT1G07370.1 Poptr1|681818  
Poptr1|567322  
Poptr1|650191  
AT5G25280.1,AT5G11090.1 Poptr1|683096,Poptr1|561939  
Poptr1|578831,Poptr1|672953  
Poptr1|578832,Poptr1|745625  
AT5G53750.1,AT4G27460.1 Poptr1|60196,Poptr1|55972  
Poptr1|555823,Poptr1|580883  
AT3G24350.1 Poptr1|578414,Poptr1|745758  
AT5G05760.1 Poptr1|567294  
Poptr1|678656  
AT1G75510.1 Poptr1|685416,Poptr1|643039  
Poptr1|55587  
AT5G15400.1 Poptr1|577702  
Poptr1|556317  
Poptr1|585855  
AT1G15010.1,AT2G01300.1 Poptr1|564591  
Poptr1|555914,Poptr1|545405  
Poptr1|555917  
Poptr1|658802  
AT2G41900.1 Poptr1|557776,Poptr1|560536,Poptr1|576336,Poptr1|716932,Poptr1|49070  
AT5G44260.1,AT1G03790.1 Poptr1|703494,Poptr1|75314  
AT4G29190.1,AT2G19810.1 Poptr1|717844,Poptr1|736815  
AT3G55980.1,AT2G40140.1 Poptr1|564036,Poptr1|728939,Poptr1|549056  
AT5G12850.1  
AT5G07500.1  
AT2G25900.1  
AT5G58620.1  
Poptr1|659505  
AT1G67140.1 Poptr1|555837  
Poptr1|555836  
Poptr1|555834  
Poptr1|545327  
AT2G39290.1,AT3G55030.1 Poptr1|720658,Poptr1|567527  
Poptr1|595106  
AT2G40290.1 Poptr1|659463,Poptr1|696771  
AT5G05470.1  
AT1G22920.1,AT1G71230.1 Poptr1|583154,Poptr1|737519  
Poptr1|672596  
AT3G47390.1 Poptr1|738641  
Poptr1|597414  
AT3G61870.1 Poptr1|572435  
Poptr1|586447,Poptr1|348124  
Poptr1|553453  
Poptr1|644622  
AT2G05030.1 Poptr1|72383,Poptr1|65743,Poptr1|570942,Poptr1|107469,Poptr1|99460,Poptr1|107304  
AT3G55260.1 Poptr1|567489  
AT1G65590.1 Poptr1|720567  
Poptr1|353493  
AT1G31220.1 Poptr1|570353,Poptr1|579339  
Poptr1|679414  
AT5G47435.1,AT4G17360.1 Poptr1|589874,Poptr1|646120  
AT4G32980.1 Poptr1|716797,Poptr1|577936  
AT4G36870.1,AT2G23760.1 Poptr1|563081  
AT2G35940.1 Poptr1|717176,Poptr1|576501  
AT5G41410.1 Poptr1|63510,Poptr1|554402  
AT1G75430.1 Poptr1|559775,Poptr1|346768  
AT2G27990.1,AT5G02030.1 Poptr1|353606  
AT2G16400.1,AT4G34610.1 Poptr1|546109,Poptr1|721939  
AT1G19700.1,AT1G75410.1 Poptr1|346769  
AT2G27220.1  
Poptr1|651010  
Poptr1|640996,Poptr1|723473  
Poptr1|595088  
Poptr1|680041

Poptr1|105690  
AT5G52390.1 Poptr1|570477,Poptr1|701196  
AT3G54040.1 Poptr1|103138,Poptr1|351854,Poptr1|735674  
Poptr1|65106  
Poptr1|557992  
AT1G32060.1 Poptr1|702966,Poptr1|554091  
AT4G17070.1 Poptr1|589929,Poptr1|580156  
Poptr1|347775  
AT5G27430.1,AT3G05230.1 Poptr1|668771,Poptr1|595578,Poptr1|695061  
AT1G51450.1 Poptr1|549232,Poptr1|697554  
AT3G27740.1 Poptr1|553916,Poptr1|739894  
Poptr1|583536  
AT1G25260.1 Poptr1|661306,Poptr1|550559  
AT1G21065.1 Poptr1|693052  
Poptr1|652291  
AT1G08280.1 Poptr1|546323,Poptr1|556992  
AT3G16980.1,AT4G16265.1 Poptr1|720425  
Poptr1|55325  
Poptr1|566800  
AT2G29990.1,AT1G07180.1 Poptr1|723028  
Poptr1|568282,Poptr1|713695  
AT1G15810.1,AT1G80620.1 Poptr1|693218  
AT3G59990.1,AT2G44180.1 Poptr1|552920  
Poptr1|545494  
AT3G01060.1 Poptr1|577711  
Poptr1|556351  
AT5G64150.1 Poptr1|555188  
Poptr1|547587  
Poptr1|577783  
AT5G22350.1 Poptr1|556843,Poptr1|594930  
Poptr1|701468  
AT1G36980.1 Poptr1|692695  
Poptr1|651356  
AT1G14810.1 Poptr1|564677,Poptr1|591327,Poptr1|566429  
AT3G57280.1 Poptr1|702934,Poptr1|554034  
AT5G45100.1,AT4G19700.1 Poptr1|586745,Poptr1|690551,Poptr1|666839,Poptr1|569175  
AT1G79110.1  
AT2G12290.1  
AT3G12920.1  
AT5G64870.1,AT5G25250.1,AT5G25260.1 Poptr1|561942  
Poptr1|583540  
Poptr1|596115  
AT4G26410.1 Poptr1|639592  
AT2G45060.1 Poptr1|552004,Poptr1|740101  
AT2G16460.1 Poptr1|697237  
AT3G51090.1  
Poptr1|655406  
AT1G02140.1 Poptr1|740188,Poptr1|551963  
AT1G68760.1 Poptr1|564470,Poptr1|748926  
Poptr1|97519,Poptr1|656751  
Poptr1|658959  
AT1G27520.1 Poptr1|575111  
AT5G43710.1 Poptr1|720944  
Poptr1|355845  
Poptr1|355846  
AT1G29880.1 Poptr1|708845,Poptr1|554684  
AT3G44740.1  
AT1G29870.1  
Poptr1|575465  
AT5G45380.1 Poptr1|554132  
Poptr1|560533  
AT1G09620.1 Poptr1|742535,Poptr1|583489  
AT2G41290.1 Poptr1|560403,Poptr1|576179  
AT3G59530.1 Poptr1|594543,Poptr1|562217  
AT3G57030.1 Poptr1|576181  
AT1G74020.1,AT1G74000.1,AT1G74010.1 Poptr1|575014,Poptr1|355479  
AT1G08470.1 Poptr1|691230  
AT3G57020.1,AT2G41300.1,AT3G57010.1  
AT5G22020.1  
Poptr1|576180,Poptr1|560404  
Poptr1|107623  
Poptr1|351424  
Poptr1|354071  
AT1G75210.1 Poptr1|573421  
Poptr1|553343  
AT2G30700.1 Poptr1|562195,Poptr1|703475  
AT1G61900.1 Poptr1|568012  
Poptr1|103367  
Poptr1|647574  
Poptr1|647573  
AT4G37120.1,AT1G65660.1 Poptr1|345865,Poptr1|57503  
AT3G45950.1

Poptr1|354577  
AT1G29195.1 Poptr1|555673,Poptr1|568712  
AT2G30230.1,AT1G06980.1 Poptr1|665963,Poptr1|688079  
AT2G33040.1 Poptr1|680840,Poptr1|661842  
AT3G12300.1 Poptr1|647349  
Poptr1|574202  
AT2G47820.1 Poptr1|97729,Poptr1|565734,Poptr1|581796,Poptr1|570813  
AT1G09050.1,AT1G55050.1,AT1G09040.1  
AT3G11500.1,AT2G23930.1 Poptr1|717665,Poptr1|735362  
AT5G57020.1 Poptr1|561044,Poptr1|582937  
AT2G44175.1  
Poptr1|585241  
AT5G05370.1,AT3G10860.1 Poptr1|665904,Poptr1|571933  
AT4G30260.1,AT2G18840.1 Poptr1|578606,Poptr1|580466  
AT2G25110.1 Poptr1|654227,Poptr1|669144  
AT1G12050.1 Poptr1|652386  
Poptr1|575962  
Poptr1|597500  
AT5G25780.1,AT5G27640.2 Poptr1|562024  
Poptr1|737430  
AT4G13970.1 Poptr1|347794  
AT1G60560.1 Poptr1|561811  
Poptr1|677629  
Poptr1|558413,Poptr1|654649  
AT1G31330.1 Poptr1|548236  
Poptr1|712735  
AT3G14250.1 Poptr1|62817,Poptr1|647383,Poptr1|104179  
AT5G60250.1 Poptr1|649070,Poptr1|351956  
AT3G45570.1,AT3G45460.1,AT2G25370.1,AT3G45510.1,AT2G21420.1,AT3G45580.1,AT3G45540.1,AT2G26130.1,A  
T2G26135.1,AT3G43750.1,AT3G45480.1  
AT3G43180.1,AT3G45560.1,AT3G45555.1  
AT2G25360.1,AT5G37560.1,AT3G45470.1  
AT3G45490.1,AT2G25380.1  
AT5G07640.1,AT2G19610.2  
AT5G55140.1 Poptr1|552748,Poptr1|664781  
AT4G37210.1 Poptr1|76212,Poptr1|651021  
Poptr1|76211  
AT5G08340.1,AT5G23330.1 Poptr1|53236  
Poptr1|558658  
Poptr1|107604  
AT4G08810.1 Poptr1|48436  
AT4G12700.1,AT2G04280.1 Poptr1|573126  
Poptr1|351016  
AT5G64760.1,AT5G09900.1 Poptr1|718965,Poptr1|558645  
AT5G25754.1,AT5G25757.1 Poptr1|344678,Poptr1|737022  
AT3G09960.1,AT3G09970.1 Poptr1|552137,Poptr1|341526  
Poptr1|572213  
Poptr1|572214  
Poptr1|644422  
AT5G58510.1 Poptr1|697439  
Poptr1|697438  
Poptr1|691522  
Poptr1|641518  
AT5G17520.1 Poptr1|730211  
AT3G07390.1 Poptr1|553231  
AT5G35735.1 Poptr1|573050,Poptr1|734515,Poptr1|552698  
AT2G04850.1 Poptr1|342996,Poptr1|573047  
AT4G12980.1,AT3G25290.1 Poptr1|684141  
AT5G48750.1,AT3G59070.1  
AT4G17280.1,AT5G47530.1  
Poptr1|584704  
AT1G73850.1 Poptr1|569824,Poptr1|700825  
AT3G20260.1 Poptr1|344806  
Poptr1|581076  
AT3G25920.1 Poptr1|354177,Poptr1|566617  
AT1G52500.2 Poptr1|740875  
AT5G65290.1 Poptr1|558496  
Poptr1|562557  
AT1G69390.1 Poptr1|564264,Poptr1|47304  
Poptr1|712786  
AT5G67590.1 Poptr1|347577,Poptr1|696201  
AT1G21720.1,AT1G77440.1 Poptr1|559264,Poptr1|710740  
AT1G02120.1 Poptr1|677682,Poptr1|551957  
Poptr1|677680  
Poptr1|677681  
AT4G10310.1 Poptr1|669794  
Poptr1|584566  
AT1G02090.1 Poptr1|347754,Poptr1|591779  
Poptr1|747260,Poptr1|553918  
AT5G54510.1,AT4G27260.1 Poptr1|571444,Poptr1|569040  
AT1G28130.1 Poptr1|63225,Poptr1|554671  
AT2G46370.1 Poptr1|644556,Poptr1|664086

AT4G03400.1 Poptr1|670564,Poptr1|730503  
AT2G47750.1 Poptr1|684289  
AT2G14960.1 Poptr1|686749,Poptr1|549965,Poptr1|587044  
AT1G48690.1,AT1G48660.1,AT1G23160.1,AT1G48670.1,AT5G13320.1,AT5G51470.1  
AT5G13380.1,AT5G13350.1,AT5G13360.1,AT5G13370.1  
AT2G23170.1,AT1G59500.1,AT4G37390.1  
Poptr1|571842  
Poptr1|681930  
AT3G59910.1,AT2G44090.1 Poptr1|562074,Poptr1|746305  
AT3G16250.1 Poptr1|691283  
AT4G32590.3 Poptr1|654077  
Poptr1|578146  
AT5G17990.1 Poptr1|728839  
Poptr1|103647  
Poptr1|575183  
AT5G62290.1 Poptr1|701134,Poptr1|662452  
AT5G22280.1,AT3G44280.1 Poptr1|703552  
Poptr1|583780,Poptr1|576539,Poptr1|561442  
AT4G38690.1 Poptr1|713244,Poptr1|649253  
AT4G34920.1,AT4G34930.1  
AT1G49330.1 Poptr1|103538,Poptr1|546039,Poptr1|557278  
AT2G16190.1  
AT1G50480.1 Poptr1|708331,Poptr1|684709  
AT2G12200.1,AT2G12280.1  
AT3G22640.1 Poptr1|715001,Poptr1|560072,Poptr1|671773  
Poptr1|566216  
AT2G38060.1 Poptr1|576921  
AT2G29650.1 Poptr1|64286  
AT5G44370.1 Poptr1|556766  
AT3G46980.3 Poptr1|64302  
AT5G20380.1 Poptr1|583656,Poptr1|578861  
AT4G00370.1  
Poptr1|653086  
Poptr1|735733  
Poptr1|109143  
AT1G12640.1,AT1G63050.1 Poptr1|709442,Poptr1|343607  
AT3G56940.1 Poptr1|47766,Poptr1|351324  
AT3G42050.1 Poptr1|730237,Poptr1|702399  
AT1G54250.1,AT3G59600.1 Poptr1|740588  
Poptr1|730147  
Poptr1|592163  
Poptr1|586131  
AT3G01790.1 Poptr1|668417,Poptr1|641767  
AT4G38570.1,AT1G68000.1 Poptr1|713351,Poptr1|649209  
Poptr1|579790  
AT5G48440.1 Poptr1|732624,Poptr1|677944  
Poptr1|732626  
Poptr1|572059  
AT5G42740.1 Poptr1|696573  
AT1G60690.1,AT1G60710.1,AT1G60730.1,AT1G60680.1 Poptr1|553072,Poptr1|684202,Poptr1|572904  
AT1G10810.1  
Poptr1|595433,Poptr1|564885,Poptr1|742042  
Poptr1|568243,Poptr1|552849  
Poptr1|583354,Poptr1|571028  
Poptr1|675423  
Poptr1|566188  
AT1G67080.1 Poptr1|580800,Poptr1|714027  
AT4G13720.1 Poptr1|690926,Poptr1|343808  
AT1G74700.1 Poptr1|744122  
AT2G04530.1 Poptr1|573034  
AT5G47030.1 Poptr1|704014  
Poptr1|703037  
Poptr1|678850  
ATCG00810.1 Poptr1|105243  
AT4G28360.1,AT1G52370.1 Poptr1|735202  
AT1G15110.1 Poptr1|55244,Poptr1|564577  
Poptr1|584627,Poptr1|579900  
AT4G25550.1 Poptr1|687855,Poptr1|575812  
AT4G29820.1 Poptr1|561032  
Poptr1|577973  
AT5G14800.1 Poptr1|695578  
Poptr1|108260  
Poptr1|576194  
AT2G34960.1 Poptr1|554606  
AT3G10600.1,AT5G04770.1 Poptr1|720451,Poptr1|567910  
AT1G58030.1 Poptr1|571264,Poptr1|573976  
AT1G05940.1 Poptr1|342644  
AT1G17120.1 Poptr1|49428  
AT4G21120.1 Poptr1|356336,Poptr1|570928  
AT5G36940.1  
Poptr1|63285  
Poptr1|346198

Poptr1|747570  
Poptr1|680616  
Poptr1|669309  
Poptr1|550319  
AT1G68590.1 Poptr1|564512,Poptr1|698251  
AT5G15760.1  
AT3G12050.1 Poptr1|735081,Poptr1|352227  
AT3G58390.1,AT4G27650.1 Poptr1|714881  
Poptr1|674081  
Poptr1|546489  
Poptr1|569355  
AT2G44140.1,AT3G59950.1 Poptr1|562066,Poptr1|746288  
AT1G27760.3 Poptr1|342575,Poptr1|56949  
AT1G50430.1 Poptr1|353123,Poptr1|698733  
Poptr1|567775  
AT4G24730.1 Poptr1|662067  
AT3G21360.1 Poptr1|548918  
Poptr1|579694,Poptr1|589799  
Poptr1|566686  
Poptr1|578095  
AT2G03220.1 Poptr1|353876  
AT2G15370.1,AT2G15390.1,AT1G14070.1,AT1G14080.1,AT2G15350.1  
AT1G74420.2  
AT1G14110.1  
AT2G03210.1  
Poptr1|555107,Poptr1|547770,Poptr1|555105,Poptr1|350922,Poptr1|547773,Poptr1|555106  
Poptr1|547771  
AT3G54470.1 Poptr1|708506,Poptr1|647290  
AT3G55010.1 Poptr1|552503,Poptr1|57186  
AT4G38800.1 Poptr1|697217,Poptr1|713189  
AT4G34840.1  
AT1G65820.1 Poptr1|592836,Poptr1|556068  
AT3G06483.1 Poptr1|54871  
AT5G61450.1 Poptr1|740010,Poptr1|554171  
AT5G11500.1 Poptr1|683084,Poptr1|695031  
AT3G25400.1 Poptr1|553082,Poptr1|664667,Poptr1|710346  
Poptr1|658024,Poptr1|719841  
AT3G07320.1 Poptr1|553217,Poptr1|586388  
AT1G66250.1 Poptr1|648133,Poptr1|552947  
AT3G13560.1 Poptr1|547619,Poptr1|647477  
AT4G05430.1 Poptr1|586815,Poptr1|75566,Poptr1|586811  
AT1G30080.1 Poptr1|556266,Poptr1|586125  
AT5G56590.1 Poptr1|582963  
AT3G23770.1,AT4G14080.1 Poptr1|597084,Poptr1|65032,Poptr1|597082  
AT3G55430.1 Poptr1|696857,Poptr1|696858  
AT3G15800.1 Poptr1|640954,Poptr1|678440  
AT2G16230.1 Poptr1|582360,Poptr1|553352,Poptr1|573279,Poptr1|582363  
AT5G24318.1 Poptr1|569580,Poptr1|574718  
AT1G32860.1 Poptr1|699211,Poptr1|550452  
AT3G55780.1 Poptr1|567319  
AT4G34480.1 Poptr1|649422,Poptr1|100870,Poptr1|648596,Poptr1|573273  
AT2G30933.1 Poptr1|559477,Poptr1|643388  
AT1G09460.1 Poptr1|671499,Poptr1|662542  
AT1G29380.1 Poptr1|674784,Poptr1|660561  
AT3G57260.1,AT3G57270.1,AT3G57240.1 Poptr1|351472  
AT5G35740.1 Poptr1|732439  
AT2G05790.1 Poptr1|592408,Poptr1|573011,Poptr1|552738  
AT2G03505.1,AT1G13830.1 Poptr1|656515,Poptr1|698371  
AT4G26830.1,AT5G55180.1 Poptr1|728035  
AT1G11820.1 Poptr1|675534,Poptr1|727451  
AT2G27500.1 Poptr1|721317,Poptr1|555873,Poptr1|594971  
AT3G58100.1 Poptr1|574358,Poptr1|678048  
AT1G77790.1,AT1G77780.1 Poptr1|551510,Poptr1|559180  
AT2G26600.1 Poptr1|578936,Poptr1|560591  
AT1G78520.1 Poptr1|588268,Poptr1|642416  
AT2G01630.1  
AT4G18340.1  
AT3G61810.1,AT4G29360.1  
AT4G16165.1,AT5G63240.1,AT1G66870.1,AT5G63250.1  
AT3G46570.1  
AT5G63230.1,AT4G09090.1,AT2G39640.1  
AT1G66855.1  
AT5G42720.1  
AT5G42100.1  
AT2G42930.1  
AT2G04910.1  
AT1G18650.1,AT5G61130.1  
AT1G26450.1,AT1G69295.1  
AT5G20390.1,AT5G20330.1,AT5G20560.1,AT5G20340.1,AT1G33220.1  
AT2G43660.2,AT3G28250.1,AT2G43670.1  
Poptr1|98038,Poptr1|573259,Poptr1|98060,Poptr1|98043  
Poptr1|588097,Poptr1|592985,Poptr1|573278,Poptr1|672050

Poptr1|665047  
Poptr1|584415,Poptr1|582362  
Poptr1|108949  
Poptr1|706159  
Poptr1|573267,Poptr1|98064,Poptr1|573260,Poptr1|582357,Poptr1|588107  
Poptr1|679329,Poptr1|672051,Poptr1|106607,Poptr1|573274  
Poptr1|98033  
Poptr1|735050  
Poptr1|55327,Poptr1|46318  
Poptr1|652688  
Poptr1|593550,Poptr1|54683  
Poptr1|557881  
Poptr1|596580,Poptr1|575901,Poptr1|652429  
Poptr1|672499  
Poptr1|64729  
AT3G23640.1 Poptr1|590129  
AT5G11720.1 Poptr1|569296,Poptr1|569295,Poptr1|65723,Poptr1|596283  
AT5G63840.1 Poptr1|558465  
AT1G68560.1 Poptr1|564524  
AT3G45940.1  
Poptr1|646378  
Poptr1|596285  
Poptr1|65722  
Poptr1|569294  
Poptr1|718651  
AT2G43360.1 Poptr1|562258  
Poptr1|582875  
AT1G44575.1 Poptr1|551454  
AT5G03555.1 Poptr1|589526  
AT4G10630.1,AT1G32760.1 Poptr1|550442  
AT1G64500.1 Poptr1|554508,Poptr1|63401  
AT5G06470.1 Poptr1|576474,Poptr1|653400  
AT5G13810.1 Poptr1|684743,Poptr1|708493  
AT5G58530.1 Poptr1|649815,Poptr1|549440  
AT5G39865.1,AT3G28850.1 Poptr1|577620  
AT5G03870.1 Poptr1|561500  
AT2G41330.1,AT3G57070.1 Poptr1|576189,Poptr1|560412  
AT3G11773.1  
AT1G67090.1,AT5G38410.1,AT5G38430.1,AT5G38420.1 Poptr1|714023,Poptr1|670906  
Poptr1|587017,Poptr1|580477,Poptr1|578586  
AT4G17260.1 Poptr1|704268,Poptr1|554197  
AT5G58330.1 Poptr1|686548  
AT1G63900.1 Poptr1|572800  
AT1G59560.1  
AT1G69340.1 Poptr1|353907,Poptr1|55381  
Poptr1|105652  
AT5G64200.1 Poptr1|709848  
Poptr1|645719  
Poptr1|559112  
AT5G18660.1 Poptr1|565352  
AT5G10690.1 Poptr1|98427  
Poptr1|672581  
Poptr1|672582,Poptr1|98430  
Poptr1|583133  
AT3G05870.1 Poptr1|594461  
AT5G26640.1  
Poptr1|562301  
AT2G25070.1,AT4G31860.1 Poptr1|561999  
Poptr1|58602  
Poptr1|590971,Poptr1|343841  
Poptr1|587195  
AT2G07741.1,ATMG01170.1,ATMG00410.1 Poptr1|593312  
Poptr1|573108  
Poptr1|585912  
AT2G17520.1 Poptr1|559974,Poptr1|349881  
AT3G11870.1  
AT5G24360.1  
AT5G20870.1 Poptr1|561542  
AT3G24330.1 Poptr1|578415  
AT5G64790.1 Poptr1|571222,Poptr1|562733,Poptr1|573902  
AT5G58090.1 Poptr1|584534,Poptr1|685761  
AT4G17180.1 Poptr1|717348,Poptr1|582323  
AT5G18220.1,AT2G19440.1,AT3G04010.1,AT1G64760.1  
Poptr1|103596  
AT4G25990.2,AT5G57180.2 Poptr1|560663  
Poptr1|579030  
AT4G26670.1,AT5G55510.1 Poptr1|707606,Poptr1|568535  
AT4G36940.1,AT2G23420.1 Poptr1|696024,Poptr1|694429  
AT1G79830.1 Poptr1|693690  
Poptr1|548869  
Poptr1|640877  
AT4G11420.1 Poptr1|570745,Poptr1|744581



AT2G34730.1 Poptr1|550620,Poptr1|672186  
AT3G19040.1,AT1G32750.1 Poptr1|718531,Poptr1|736035  
AT5G58040.1 Poptr1|695231,Poptr1|578771  
AT3G66652.1  
AT4G37790.1,AT2G22800.1 Poptr1|72115,Poptr1|718008  
AT4G16780.1 Poptr1|740060,Poptr1|349764  
AT2G44910.1,AT3G60390.1 Poptr1|711127,Poptr1|591798  
AT2G01430.1 Poptr1|566499,Poptr1|354246  
AT5G06710.1 Poptr1|745407,Poptr1|561243  
AT5G47370.1,AT4G17460.1  
AT1G70920.1  
Poptr1|684435  
Poptr1|560630  
Poptr1|735065,Poptr1|650344  
AT5G26770.1,AT3G05830.1 Poptr1|581608,Poptr1|729347  
AT1G09483.1,AT1G09470.1  
AT3G49055.1 Poptr1|575841  
AT3G19840.1 Poptr1|659322,Poptr1|564188  
Poptr1|567061  
AT1G60200.1 Poptr1|698115  
Poptr1|720481  
AT2G30880.1 Poptr1|643362,Poptr1|714891  
AT2G27285.1,AT2G27280.1,AT1G55928.1 Poptr1|648959  
Poptr1|594962  
AT4G02720.1 Poptr1|346971,Poptr1|651773  
AT4G20760.1 Poptr1|569326  
AT4G22350.1 Poptr1|560149,Poptr1|57860  
AT4G22410.1  
AT1G16770.1 Poptr1|582218,Poptr1|584782,Poptr1|585631,Poptr1|588880  
Poptr1|590397  
AT5G15710.1 Poptr1|583883,Poptr1|584637  
AT1G70985.1,AT1G23050.1 Poptr1|696533,Poptr1|566503  
AT5G44500.1,AT4G20440.1 Poptr1|569311  
Poptr1|674721  
AT1G08060.1,AT2G28240.1 Poptr1|108404,Poptr1|570689,Poptr1|595082,Poptr1|581661  
AT2G32600.1 Poptr1|667866  
Poptr1|676096  
AT3G16650.1,AT4G15900.1 Poptr1|697821  
Poptr1|596140  
AT1G58230.1 Poptr1|551710  
AT1G58227.1 Poptr1|551712  
Poptr1|643949  
Poptr1|643951  
Poptr1|72181  
AT4G05410.1 Poptr1|558393,Poptr1|718559  
AT4G21130.1  
AT4G38430.1 Poptr1|54360,Poptr1|546285  
AT1G79860.1 Poptr1|548857,Poptr1|349579  
AT1G31650.1 Poptr1|702997,Poptr1|350019  
AT5G02010.1 Poptr1|560838  
AT1G01700.1 Poptr1|347975,Poptr1|572255  
AT1G52240.1  
AT4G13240.1  
AT3G16130.1  
AT3G55660.1,AT5G05940.1  
AT4G00460.1  
AT2G45890.1  
Poptr1|550810,Poptr1|559902  
Poptr1|104780  
Poptr1|659598  
Poptr1|107353  
AT5G25150.1 Poptr1|689063,Poptr1|353013  
Poptr1|595325  
AT3G07300.1 Poptr1|547827,Poptr1|343874  
Poptr1|584181  
AT5G16780.1 Poptr1|640254  
AT3G14700.1  
Poptr1|712731  
Poptr1|646843  
AT3G25840.1 Poptr1|566642  
AT3G53640.1,AT1G13350.1  
Poptr1|564516  
AT5G51410.1 Poptr1|590184,Poptr1|581265,Poptr1|554179  
AT1G53720.1 Poptr1|71852  
AT1G44478.1  
Poptr1|562866  
AT1G80930.1 Poptr1|577016  
AT1G52325.1  
AT5G25060.1,AT5G10800.1 Poptr1|344775,Poptr1|689072  
AT1G17970.1,AT1G73760.1 Poptr1|569793  
AT1G53190.1,AT3G15070.1 Poptr1|660699,Poptr1|642365  
AT3G19910.1 Poptr1|719012

AT2G37150.1 Poptr1|659854,Poptr1|344909  
AT3G63530.1 Poptr1|64561  
AT5G24870.1,AT5G10650.1 Poptr1|583148,Poptr1|586323,Poptr1|583150  
AT4G31450.1  
Poptr1|666243  
Poptr1|701170  
Poptr1|650884  
Poptr1|724954  
Poptr1|649962  
Poptr1|356288,Poptr1|690885,Poptr1|712288  
AT4G25020.1,AT1G33520.1 Poptr1|590128,Poptr1|349999  
AT1G28060.1 Poptr1|55568,Poptr1|353474  
AT3G56790.1,AT3G55930.1  
AT1G65280.1 Poptr1|574282  
Poptr1|592233  
AT4G30600.1 Poptr1|561342  
Poptr1|737984  
AT1G01510.1 Poptr1|572304,Poptr1|692384  
AT3G06950.1 Poptr1|721191  
Poptr1|565473  
AT2G25670.1,AT4G32610.1 Poptr1|561816,Poptr1|578136  
AT1G17840.1 Poptr1|746499,Poptr1|584512  
AT3G21090.1,AT1G51500.1 Poptr1|64458,Poptr1|557874  
AT2G28070.1 Poptr1|745926,Poptr1|723618  
AT3G21080.1  
Poptr1|103707,Poptr1|51706,Poptr1|65124,Poptr1|65126  
Poptr1|562568  
Poptr1|594397  
Poptr1|576365,Poptr1|54678  
Poptr1|576366  
Poptr1|64459  
Poptr1|586105  
AT5G06680.1 Poptr1|653474,Poptr1|576391  
AT4G03320.1 Poptr1|580353  
Poptr1|651974,Poptr1|710803  
AT2G33630.1 Poptr1|342094  
Poptr1|705567  
Poptr1|560000  
AT5G24890.1 Poptr1|704630,Poptr1|578376  
AT3G03170.1  
AT4G31510.1,AT2G24550.1  
AT3G21640.1 Poptr1|722820,Poptr1|691456  
AT4G23570.3,AT4G11260.1 Poptr1|741126,Poptr1|546552  
Poptr1|563059  
AT1G14030.1 Poptr1|564247  
Poptr1|566998  
Poptr1|659271  
AT2G27920.1 Poptr1|721203  
Poptr1|589528  
AT4G26600.1,AT5G55920.1 Poptr1|691839  
AT4G33460.1 Poptr1|71517  
AT1G65410.1 Poptr1|704955,Poptr1|572789  
AT1G63270.1 Poptr1|669616  
AT3G28380.1,AT4G18050.1,AT2G47000.1  
Poptr1|589477,Poptr1|572530,Poptr1|725562,Poptr1|692225,Poptr1|688227,Poptr1|569080,Poptr1|57148  
2,Poptr1|711431,Poptr1|572533,Poptr1|560653,Poptr1|572531,Poptr1|100357  
AT1G10680.1,AT4G25960.1,AT3G28390.1,AT1G28010.1,AT1G27940.1,AT3G28860.1,AT3G28415.1  
Poptr1|736283,Poptr1|343480,Poptr1|584139,Poptr1|579021,Poptr1|346253,Poptr1|574609  
AT5G58270.1 Poptr1|571941,Poptr1|738973  
AT5G14100.1 Poptr1|597142  
AT1G67940.1 Poptr1|702316  
AT1G70610.1 Poptr1|697975  
AT4G25450.1 Poptr1|575754  
AT5G39040.1 Poptr1|701875  
AT2G39480.1,AT3G55320.1 Poptr1|353501,Poptr1|687367  
AT5G03910.1 Poptr1|695172  
AT5G46540.1  
AT3G62150.1  
AT4G01830.1,AT4G01820.1,AT1G02530.1,AT1G02520.1  
AT2G36910.1  
AT4G28630.1,AT4G28620.1  
Poptr1|104252,Poptr1|590871  
Poptr1|677099,Poptr1|594382  
Poptr1|587750  
Poptr1|107876  
Poptr1|351635  
Poptr1|105166  
Poptr1|108822  
Poptr1|586891  
Poptr1|346672  
Poptr1|583782  
Poptr1|105082

Poptr1|581277  
 Poptr1|107861,Poptr1|590034  
 Poptr1|587399  
 Poptr1|549722  
 Poptr1|583241,Poptr1|109033  
 Poptr1|595179  
 Poptr1|584946  
 Poptr1|652824  
 Poptr1|570517,Poptr1|575755  
 Poptr1|581407,Poptr1|97453,Poptr1|581405  
 Poptr1|667946  
 Poptr1|581404  
 Poptr1|577963  
 Poptr1|577962  
 Poptr1|586845  
 AT1G60030.1 Poptr1|698119,Poptr1|720220  
 AT1G65550.1 Poptr1|572027  
 AT1G49960.1 Poptr1|722433  
 AT2G34190.1 Poptr1|545167,Poptr1|687562  
 AT2G27810.1 Poptr1|741646,Poptr1|54318  
 AT5G62890.1 Poptr1|570060,Poptr1|575121  
 AT2G26510.1 Poptr1|347686,Poptr1|591884  
 AT2G05760.1 Poptr1|57313  
 AT1G10540.1  
 AT5G25420.1  
 AT4G38050.1  
 AT5G49990.1  
 Poptr1|65301  
 Poptr1|583005  
 AT1G65470.1 Poptr1|656344,Poptr1|665142  
 Poptr1|656343  
 Poptr1|567172  
 AT5G45290.1 Poptr1|693534,Poptr1|676688  
 Poptr1|676687  
 Poptr1|644272,Poptr1|578817,Poptr1|591729  
 AT4G39120.1 Poptr1|557208  
 AT4G25200.1,AT5G51440.1 Poptr1|693521  
 Poptr1|349724  
 Poptr1|553861,Poptr1|351375  
 Poptr1|558173  
 AT3G50590.1 Poptr1|696038  
 Poptr1|53320  
 Poptr1|71983  
 AT5G06420.1,AT1G01350.1 Poptr1|731318  
 AT4G01023.1  
 AT5G55990.1,AT4G26570.2 Poptr1|707735,Poptr1|660679  
 AT5G47100.1,AT4G17615.1 Poptr1|739852,Poptr1|670473  
 AT4G33000.1 Poptr1|695089  
 AT5G24270.1 Poptr1|661524,Poptr1|666129  
 AT4G26560.1  
 AT4G01420.1  
 AT1G64480.1  
 Poptr1|560076  
 Poptr1|592745  
 Poptr1|350363  
 Poptr1|576890,Poptr1|574749  
 Poptr1|579841  
 AT5G05970.1 Poptr1|353602,Poptr1|698553  
 AT4G21520.1 Poptr1|568298  
 Poptr1|647706  
 Poptr1|647705  
 AT4G19210.1 Poptr1|703832  
 AT4G30300.1  
 AT3G13640.1  
 Poptr1|596868  
 Poptr1|712264  
 AT5G14230.1 Poptr1|565895  
 Poptr1|641773  
 Poptr1|65776,Poptr1|661250  
 AT5G40160.1 Poptr1|584852,Poptr1|65277  
 AT5G66055.1 Poptr1|704963,Poptr1|741191  
 AT5G39840.1 Poptr1|736302  
 AT4G14790.1 Poptr1|566213  
 Poptr1|108874  
 AT1G71696.2 Poptr1|52047  
 Poptr1|347090  
 AT3G07560.1 Poptr1|679642  
 Poptr1|664949  
 AT1G27090.1 Poptr1|696222,Poptr1|657575  
 AT3G24690.1  
 AT3G16090.1,AT1G65040.2 Poptr1|56849,Poptr1|588683  
 AT1G04610.1,AT2G33230.1 Poptr1|565856,Poptr1|345480

AT4G28720.1 Poptr1|553273  
AT5G25620.1 Poptr1|561795  
AT1G21430.1 Poptr1|60673,Poptr1|356866,Poptr1|559318  
AT5G11320.1 Poptr1|561834  
AT1G04180.1,AT5G43890.1  
AT4G13260.1  
AT1G48910.1  
Poptr1|53364  
Poptr1|583704  
AT5G60190.1 Poptr1|570658  
AT4G26470.1 Poptr1|684108  
AT3G24110.1  
AT2G43940.1 Poptr1|577288  
AT2G43920.1,AT2G43910.1  
Poptr1|562089  
AT2G43945.1,AT3G59870.1 Poptr1|681222  
AT5G62670.1,AT3G47950.1 Poptr1|699453,Poptr1|575053  
AT3G42640.1,AT2G07560.1 Poptr1|351145,Poptr1|578793,Poptr1|344473  
AT2G24520.1 Poptr1|737524,Poptr1|689125,Poptr1|98440,Poptr1|743411  
AT1G17260.1 Poptr1|702851  
AT1G80660.1  
AT5G57350.1,AT4G30190.1,AT2G18960.1  
AT4G11730.1  
Poptr1|349771,Poptr1|591788  
Poptr1|640486  
AT5G08600.1,AT4G02400.1 Poptr1|664422,Poptr1|644765  
AT1G25540.1 Poptr1|55283  
Poptr1|569863  
Poptr1|656781  
Poptr1|587419  
Poptr1|656780  
AT5G64420.1 Poptr1|649770,Poptr1|642172  
AT2G47710.1 Poptr1|644863,Poptr1|688269,Poptr1|552434  
AT5G49050.1  
Poptr1|587324  
AT5G28740.1 Poptr1|713684  
AT3G17040.1 Poptr1|698317  
AT5G06690.2 Poptr1|567644,Poptr1|563710,Poptr1|735077  
AT5G04260.1  
AT5G51970.1 Poptr1|728768  
Poptr1|575760  
Poptr1|570511  
AT3G01460.1 Poptr1|668457  
Poptr1|668459  
Poptr1|577512  
Poptr1|736187  
Poptr1|668458  
AT1G16700.1,AT1G79010.1 Poptr1|546062,Poptr1|649414  
AT1G77510.1,AT1G21750.1 Poptr1|72470,Poptr1|643603  
AT3G62510.1  
AT1G04980.1,AT2G32920.1 Poptr1|732350  
AT2G30990.1 Poptr1|572850  
AT1G29240.1,AT2G34170.1 Poptr1|568706,Poptr1|555669  
AT5G45850.1,AT4G18630.1  
AT5G61260.1,AT5G07820.1 Poptr1|574863,Poptr1|569945,Poptr1|569947  
AT3G17860.1 Poptr1|666332,Poptr1|661656  
AT1G48500.1  
Poptr1|698168,Poptr1|656962  
AT5G15810.1,AT3G02320.1 Poptr1|556394,Poptr1|583851  
AT2G35320.1 Poptr1|356606  
Poptr1|580091  
AT2G06050.1 Poptr1|672416,Poptr1|689817,Poptr1|47967  
AT1G76680.2,AT1G76690.1 Poptr1|59553  
AT1G09400.1  
AT1G17990.1,AT1G18020.1  
Poptr1|106155,Poptr1|703231,Poptr1|592336  
Poptr1|565340,Poptr1|704701,Poptr1|98650  
Poptr1|592335  
Poptr1|678949  
AT5G16620.1 Poptr1|693876  
Poptr1|645228  
AT5G48220.1 Poptr1|573118  
AT2G04400.1  
Poptr1|103648  
AT3G60820.1 Poptr1|700158,Poptr1|552055  
AT5G18800.1,AT3G06310.1 Poptr1|721121,Poptr1|686991  
AT3G46450.2 Poptr1|691412,Poptr1|697661  
AT3G26890.1,AT5G41110.1 Poptr1|570323,Poptr1|691667,Poptr1|575429  
Poptr1|597102  
AT4G35360.1,AT2G17340.1 Poptr1|595023,Poptr1|648904  
AT2G17320.1  
AT1G71950.1 Poptr1|665763,Poptr1|592238

Poptr1|748592  
AT4G15930.1 Poptr1|596123  
AT1G53590.1,AT3G14590.1 Poptr1|550330  
AT2G46900.1 Poptr1|644697,Poptr1|664221  
AT5G47120.1 Poptr1|676443,Poptr1|712021,Poptr1|580169  
AT4G17580.1  
AT5G47130.1  
AT1G77000.1,AT1G21410.1 Poptr1|684529,Poptr1|694597  
AT3G24570.1 Poptr1|58652  
Poptr1|578112  
Poptr1|344683  
AT2G32190.1,AT2G32200.1,AT2G32210.1,AT1G05340.1 Poptr1|652461,Poptr1|667174  
AT1G56060.1  
AT5G05680.1 Poptr1|564010,Poptr1|564013  
Poptr1|564014  
AT5G15530.1 Poptr1|556403,Poptr1|736444  
AT5G16390.1 Poptr1|665593  
AT1G75060.1,AT1G19330.1 Poptr1|740258,Poptr1|644195  
Poptr1|350254,Poptr1|691123  
Poptr1|587167,Poptr1|575150,Poptr1|597726,Poptr1|580287,Poptr1|587520,Poptr1|350275,Poptr1|56124  
5,Poptr1|594149,Poptr1|591413,Poptr1|104353,Poptr1|585312,Poptr1|577015,Poptr1|554974,Poptr1|578324,Poptr1|5  
84632,Poptr1|580668,Poptr1|594796,Poptr1|596163,Poptr1|594143,Poptr1|581734,Poptr1|580457,Poptr1|585818,Pop  
ptr1|579730,Poptr1|595719,Poptr1|583216,Poptr1|590780,Poptr1|580709,Poptr1|579907  
AT1G69380.1 Poptr1|696691,Poptr1|566971  
AT1G67780.1,AT1G67270.1,AT5G38690.1 Poptr1|352955  
AT5G43930.1,AT1G04140.2 Poptr1|692017,Poptr1|700713  
AT1G16210.1 Poptr1|649174  
AT5G11580.1 Poptr1|701951  
AT3G54210.1 Poptr1|702817,Poptr1|58280  
AT5G09770.1,AT5G64650.1 Poptr1|650590,Poptr1|654637  
AT5G48950.1,AT1G48320.1 Poptr1|657784  
Poptr1|580988  
AT4G35790.1 Poptr1|346329,Poptr1|99779  
AT3G15730.1,AT1G52570.1 Poptr1|48920,Poptr1|59592  
AT2G42010.1 Poptr1|347907  
AT4G00240.1  
Poptr1|559891,Poptr1|550827  
Poptr1|349227  
Poptr1|344732  
Poptr1|560605,Poptr1|578949  
Poptr1|669049  
Poptr1|691169  
Poptr1|730958  
AT3G18890.1 Poptr1|694143,Poptr1|557298  
AT5G55940.1 Poptr1|65518,Poptr1|691841  
AT5G51620.2  
AT5G66410.1,AT3G50960.1 Poptr1|563201  
AT4G13615.1,AT3G24100.1 Poptr1|641924,Poptr1|703025  
AT1G06200.1,AT2G31140.1 Poptr1|684608,Poptr1|651908  
AT1G19485.1 Poptr1|721032  
Poptr1|560369  
AT5G49020.1,AT3G06930.2 Poptr1|746860,Poptr1|657892  
Poptr1|587296  
AT1G15280.2,AT1G80000.1 Poptr1|553698,Poptr1|548666  
AT1G77680.1 Poptr1|342433,Poptr1|72433  
Poptr1|587496  
AT4G19670.1 Poptr1|575570,Poptr1|690542  
Poptr1|575575  
AT1G65220.1,AT5G36230.1 Poptr1|665579,Poptr1|703858  
AT5G11470.1 Poptr1|561798  
Poptr1|578120  
AT4G02810.1,AT1G03170.1 Poptr1|559547,Poptr1|657124,Poptr1|551183,Poptr1|566284  
AT5G19260.1,AT3G06020.1  
AT5G67220.1 Poptr1|719210  
AT3G22440.1,AT4G14900.1 Poptr1|657165  
Poptr1|705276  
AT3G27550.1 Poptr1|49165  
AT4G13070.1 Poptr1|596942  
AT2G28480.1 Poptr1|75394  
AT2G40950.1 Poptr1|701299  
AT3G56660.1  
AT3G10800.1  
Poptr1|652546  
AT3G43590.1 Poptr1|594901,Poptr1|556888  
AT3G43490.1  
AT5G36240.1  
Poptr1|576433  
AT3G14067.1 Poptr1|690413  
AT1G62340.1 Poptr1|568089  
AT1G04110.1 Poptr1|349102  
AT4G21160.1,AT4G05330.1 Poptr1|707743  
AT5G67090.1 Poptr1|551840,Poptr1|59470,Poptr1|740448,Poptr1|719279

AT5G51750.1 Poptr1|570550,Poptr1|734063  
AT3G07940.1 Poptr1|690870,Poptr1|555030  
AT2G05920.1 Poptr1|702664  
AT4G34980.1 Poptr1|556628,Poptr1|557090  
AT2G04160.1 Poptr1|573140,Poptr1|684103  
AT1G32940.1,AT4G10510.1,AT1G32960.1,AT4G10550.1,AT1G32950.1,AT4G10540.1,AT4G10530.1,AT4G10520.1  
Poptr1|550464,Poptr1|569265  
AT5G47710.1 Poptr1|560097,Poptr1|701215  
AT3G17980.1,AT1G48590.1,AT1G73580.1 Poptr1|687736  
AT1G70790.1,AT2G01540.1 Poptr1|686298,Poptr1|658758  
AT5G03620.1 Poptr1|589582  
AT5G45650.1 Poptr1|568484  
AT1G20160.1 Poptr1|710611,Poptr1|559867  
AT4G30020.1,AT2G19170.1 Poptr1|689202,Poptr1|560673  
AT5G59110.1,AT1G20150.1,AT1G66220.1,AT5G59100.1,AT1G32970.1,AT4G21640.1,AT5G11940.1,AT5G58820.1,AT  
3G46840.1,AT5G59120.1,AT4G21650.1,AT5G58830.1,AT5G59130.1,AT5G59190.1,AT4G15040.1,AT1G66210.1,AT4  
G26330.1,AT1G01900.1,AT4G00230.1,AT5G67360.1,AT5G45640.1,AT4G21326.1,AT4G20430.1,AT3G46850.1,AT5G  
59090.1,AT4G21323.1,AT1G30600.1,AT2G39850.1,AT5G44530.1,AT3G14240.1,AT1G32980.1,AT5G58840.1,AT4G2  
1630.1,AT5G59810.1  
Poptr1|705065,Poptr1|567348,Poptr1|573376,Poptr1|109225,Poptr1|705289,Poptr1|645825,Poptr1|56735  
1,Poptr1|343913,Poptr1|107762,Poptr1|558012,Poptr1|573377,Poptr1|351105,Poptr1|558450,Poptr1|694451,Poptr1|6  
90422,Poptr1|589921,Poptr1|642524,Poptr1|582668,Poptr1|62671,Poptr1|551801,Poptr1|548551,Poptr1|572158,Poptr  
r1|105666,Poptr1|550465,Poptr1|594810,Poptr1|546328,Poptr1|103326,Poptr1|97141,Poptr1|569308,Poptr1|697239,  
Poptr1|65969,Poptr1|103324,Poptr1|596255,Poptr1|105530,Poptr1|713118,Poptr1|730952,Poptr1|552099,Poptr1|554  
280,Poptr1|554277,Poptr1|596114,Poptr1|65968,Poptr1|592573,Poptr1|582559,Poptr1|65781,Poptr1|103785,Poptr1|7  
40568,Poptr1|75642,Poptr1|350153,Poptr1|596538,Poptr1|707935,Poptr1|567346,Poptr1|569264,Poptr1|552098,Poptr  
r1|75645,Poptr1|550849,Poptr1|356317,Poptr1|567352,Poptr1|554279,Poptr1|553817,Poptr1|567347,Poptr1|573547,  
Poptr1|691930,Poptr1|563955,Poptr1|727231,Poptr1|642525  
AT1G70800.1,AT1G23140.1,AT1G70810.1  
Poptr1|594045,Poptr1|586013  
Poptr1|597750  
Poptr1|65970  
Poptr1|575004  
Poptr1|645270,Poptr1|714125  
Poptr1|579601  
Poptr1|587568  
Poptr1|596655  
AT2G39130.1 Poptr1|720698  
AT5G15240.1 Poptr1|577647,Poptr1|577648  
AT2G41190.1 Poptr1|351403  
AT5G02170.1,AT3G09340.1,AT3G09330.1,AT5G02180.1 Poptr1|576813  
AT3G54830.1  
AT3G28960.1  
Poptr1|659912  
Poptr1|659914  
Poptr1|567647  
AT4G34030.1 Poptr1|722207  
Poptr1|583442  
Poptr1|581518  
AT4G29680.1 Poptr1|653311,Poptr1|582943  
AT4G29700.1,AT4G29690.1  
AT4G29710.1  
AT2G45000.1 Poptr1|353678,Poptr1|656777,Poptr1|591696  
Poptr1|664846  
AT2G33490.1 Poptr1|65003,Poptr1|554727,Poptr1|63180  
AT3G26910.2,AT5G41100.1  
AT5G13450.1 Poptr1|697500  
AT5G06160.1 Poptr1|574785,Poptr1|569530  
Poptr1|593155  
Poptr1|102225  
AT1G72650.2,AT1G17460.1 Poptr1|548585,Poptr1|553628  
AT2G37025.1 Poptr1|676030  
AT1G36020.1,AT1G35530.1 Poptr1|592269,Poptr1|102966  
AT1G64180.1,AT5G41620.1 Poptr1|640407,Poptr1|693400  
Poptr1|552236,Poptr1|572340  
AT3G02580.1,AT3G02590.1 Poptr1|580817,Poptr1|714052  
Poptr1|677461  
AT2G32380.1,AT1G05210.1 Poptr1|557240  
AT1G05220.1  
AT5G23630.1 Poptr1|573611,Poptr1|97928  
AT2G46520.1 Poptr1|644596,Poptr1|664131  
Poptr1|576962  
AT3G08960.1 Poptr1|58206  
AT3G08955.1  
AT5G06960.1,AT5G06950.1,AT3G12250.4 Poptr1|576169,Poptr1|711937  
AT5G06839.1 Poptr1|576288,Poptr1|583626  
AT1G68640.1 Poptr1|564507  
AT1G77920.1,AT1G22070.1 Poptr1|711000,Poptr1|685273  
AT1G08320.1 Poptr1|594982  
AT5G10030.1,AT5G65210.1 Poptr1|558594,Poptr1|53207  
Poptr1|652586  
AT5G48490.1,AT5G48485.1 Poptr1|692036,Poptr1|700547

Poptr1|697297  
AT1G20440.1,AT1G76180.1,AT1G20450.1 Poptr1|694892  
AT4G38410.1  
AT2G26280.1 Poptr1|561567,Poptr1|578018  
AT4G12740.1 Poptr1|573155  
AT1G70070.1 Poptr1|658366  
Poptr1|565219  
Poptr1|565220  
AT5G14520.1 Poptr1|712790  
Poptr1|577701,Poptr1|579669  
AT1G58110.1 Poptr1|584476,Poptr1|553391  
AT1G35490.1  
Poptr1|645623  
Poptr1|575858  
AT5G49580.1 Poptr1|55341  
AT1G16680.1 Poptr1|674741,Poptr1|661155  
AT1G79030.1  
Poptr1|564357  
AT3G56980.1,AT3G56970.1,AT2G41240.1 Poptr1|576175,Poptr1|351398,Poptr1|717415  
AT1G71200.1  
AT5G04150.1  
AT5G37800.1,AT1G66470.1 Poptr1|348808,Poptr1|555949  
AT2G24260.1,AT4G30980.1 Poptr1|561311,Poptr1|669610  
AT1G03040.1,AT4G02590.1 Poptr1|551101  
AT2G14760.1,AT4G33880.1 Poptr1|65285  
AT5G58010.1  
Poptr1|687968,Poptr1|595424  
Poptr1|559634  
Poptr1|559633  
AT1G80460.1 Poptr1|59582  
Poptr1|587915  
AT5G47860.1 Poptr1|63253,Poptr1|693303  
AT1G22970.1,AT1G71150.1,AT1G22980.1 Poptr1|55243,Poptr1|564579  
AT4G04330.1 Poptr1|727483  
AT5G63060.1 Poptr1|666508  
AT1G01630.1 Poptr1|46268,Poptr1|693288  
AT1G75170.1 Poptr1|679233,Poptr1|553349  
AT1G14820.3 Poptr1|720696  
AT4G08690.1 Poptr1|710228,Poptr1|559134  
AT1G22180.2  
Poptr1|719501  
Poptr1|61229  
Poptr1|658705,Poptr1|581279  
Poptr1|573988  
AT3G05190.1,AT5G27410.1 Poptr1|595547  
AT1G08400.1 Poptr1|558181  
AT3G47700.1 Poptr1|97422  
AT5G22620.1 Poptr1|703510  
Poptr1|580901  
AT5G53490.1 Poptr1|569581  
Poptr1|574717  
AT4G02030.1 Poptr1|731707  
Poptr1|552524  
Poptr1|552525  
AT5G55580.1 Poptr1|49381  
Poptr1|583732  
Poptr1|590262  
AT5G38710.1,AT3G30775.1 Poptr1|545677,Poptr1|704134  
AT3G49490.1 Poptr1|661625,Poptr1|666042  
Poptr1|557611,Poptr1|550483,Poptr1|552798  
AT4G15240.1 Poptr1|703439  
AT3G11420.1 Poptr1|344991,Poptr1|724662  
AT1G05280.1 Poptr1|594444  
AT1G33250.1 Poptr1|569223,Poptr1|550511  
AT2G37730.1 Poptr1|576822,Poptr1|351808,Poptr1|105341  
AT4G11350.1,AT4G23490.1 Poptr1|693416,Poptr1|548430  
AT5G12460.1 Poptr1|557867,Poptr1|49046  
AT1G01570.1,AT4G00300.1  
AT5G41460.1  
Poptr1|591329,Poptr1|570354  
Poptr1|575458  
AT5G13800.1 Poptr1|697535  
Poptr1|64498,Poptr1|64452  
AT4G36610.1,AT2G18360.1 Poptr1|53381,Poptr1|689718  
Poptr1|546075,Poptr1|557247  
Poptr1|556474  
AT3G25660.1 Poptr1|689112  
AT5G18590.1 Poptr1|54957,Poptr1|703704  
AT4G36080.1,AT2G17930.1 Poptr1|349870,Poptr1|356886  
AT3G01720.1 Poptr1|691616  
AT4G26060.1,AT5G57060.1 Poptr1|653256,Poptr1|736913  
Poptr1|742910,Poptr1|553537

AT4G27430.1 Poptr1|703970,Poptr1|568940  
AT1G61100.1 Poptr1|568260,Poptr1|545041  
AT3G54610.1 Poptr1|692868,Poptr1|559629  
Poptr1|593378  
AT2G33205.1 Poptr1|350645  
AT4G13345.1,AT3G24460.1 Poptr1|58640  
AT3G24220.1 Poptr1|554823  
AT4G19170.1 Poptr1|738927,Poptr1|558466  
AT3G14440.1 Poptr1|55939,Poptr1|745256  
AT3G63520.1 Poptr1|705370,Poptr1|706412  
AT1G78390.1  
Poptr1|594189,Poptr1|594858,Poptr1|579588,Poptr1|556916  
Poptr1|594859  
Poptr1|579589,Poptr1|556918  
Poptr1|660513  
Poptr1|673323,Poptr1|691461  
Poptr1|747975  
Poptr1|585395  
Poptr1|586231  
Poptr1|580841  
AT1G59453.1,AT1G58766.1,AT1G17450.1,AT1G59077.1 Poptr1|553625  
AT3G28460.1 Poptr1|691550  
Poptr1|579203  
AT2G33720.1 Poptr1|545342,Poptr1|585119,Poptr1|555102  
AT4G02870.1,AT1G78640.1  
AT4G05630.1  
AT5G26805.1  
AT1G77855.1,AT1G22030.1 Poptr1|342454,Poptr1|694534  
Poptr1|553421,Poptr1|63859  
AT5G41970.1 Poptr1|684832  
Poptr1|574696  
AT5G22080.1 Poptr1|697713,Poptr1|683788  
AT5G22770.1,AT5G22780.1 Poptr1|594849  
AT2G47600.1 Poptr1|688262  
AT1G61030.1,AT1G11060.1 Poptr1|647753,Poptr1|670952  
Poptr1|670951,Poptr1|647752  
AT3G04780.1 Poptr1|662905,Poptr1|703632  
AT4G38630.1 Poptr1|553979,Poptr1|713282,Poptr1|557094  
AT2G20260.1,AT4G28750.1 Poptr1|645526  
Poptr1|665098  
AT1G35250.1,AT1G68280.1,AT1G35290.1,AT1G68260.1 Poptr1|723735  
AT2G28390.1 Poptr1|697722  
Poptr1|680015  
Poptr1|680017  
AT4G17770.1 Poptr1|343481  
AT1G70290.1,AT1G23870.1,AT1G60140.1 Poptr1|57591,Poptr1|345933  
AT2G18700.1 Poptr1|58723,Poptr1|561404  
AT1G06410.1 Poptr1|545143,Poptr1|568670  
AT1G78580.1 Poptr1|704920  
AT1G68020.2 Poptr1|656997,Poptr1|726767  
AT4G27550.1,AT1G16980.1  
Poptr1|739953  
Poptr1|107731  
Poptr1|545108  
AT4G28030.1 Poptr1|561400  
AT5G16300.1 Poptr1|686419  
Poptr1|659395  
Poptr1|724291  
AT1G24310.1 Poptr1|345487  
Poptr1|726047  
AT2G33560.1 Poptr1|694931,Poptr1|684695  
AT3G12280.1 Poptr1|639804  
AT2G19080.1 Poptr1|560682  
Poptr1|589629,Poptr1|584565  
Poptr1|579053  
AT3G54300.1 Poptr1|725415,Poptr1|682461  
AT2G33120.2,AT1G04750.1 Poptr1|554835,Poptr1|683577  
AT5G22360.1 Poptr1|650388,Poptr1|705913  
AT2G25340.1,AT4G32150.1 Poptr1|737243,Poptr1|352944  
AT2G33110.1,AT2G32670.1  
AT3G24890.1,AT1G04760.1  
AT4G15780.1  
AT5G11150.1  
Poptr1|733907  
Poptr1|578902  
AT3G07430.1,AT4G27990.1 Poptr1|553241  
AT5G66800.1 Poptr1|581507,Poptr1|655159,Poptr1|557377  
AT3G50640.1  
AT3G19200.1  
AT1G62190.1,AT2G22890.1,AT4G27030.1 Poptr1|700014  
Poptr1|569119  
AT5G30510.1 Poptr1|659138,Poptr1|696651



AT1G67340.1 Poptr1|554777,Poptr1|548031  
Poptr1|570255  
AT2G01980.1 Poptr1|698143,Poptr1|354350  
AT1G14660.1  
Poptr1|562521  
AT2G27960.1 Poptr1|697759  
AT2G27970.1  
Poptr1|584460  
AT1G03910.1 Poptr1|589536  
Poptr1|589535  
Poptr1|641169  
AT3G01480.1 Poptr1|64734  
Poptr1|668461  
Poptr1|577518  
AT1G72120.1,AT1G22570.1,AT1G22550.1,AT1G22540.1  
Poptr1|592298,Poptr1|592299,Poptr1|581151,Poptr1|740733  
AT1G69850.1,AT1G27040.1,AT5G62730.1 Poptr1|569993  
AT1G32450.1 Poptr1|704006,Poptr1|356594  
AT3G25280.1,AT3G25260.1 Poptr1|349033  
AT1G33440.1 Poptr1|583466,Poptr1|581025,Poptr1|60074  
AT5G46050.1,AT5G46040.1 Poptr1|345460,Poptr1|725893  
AT5G13400.1 Poptr1|548116  
AT1G12110.1 Poptr1|554200  
AT5G19640.1 Poptr1|62771,Poptr1|555274  
AT2G40460.1 Poptr1|574087  
AT5G28470.1 Poptr1|58146,Poptr1|351828  
AT3G53960.1,AT2G37900.1 Poptr1|688804,Poptr1|695404,Poptr1|686466  
AT1G27080.1,AT1G69870.1 Poptr1|355047  
AT5G62680.1,AT3G47960.1 Poptr1|345902  
AT3G01350.1,AT5G14940.1 Poptr1|555571,Poptr1|746479  
AT1G68570.1 Poptr1|723778  
AT3G45700.1,AT3G45710.1,AT3G45680.1,AT3G45660.1,AT3G45720.1,AT3G45690.1,AT3G45650.1  
Poptr1|353444  
AT3G54140.1 Poptr1|351879,Poptr1|58170  
AT3G54450.1 Poptr1|62902  
AT3G16180.1,AT1G52190.1 Poptr1|548878  
AT1G59740.1  
AT2G26690.1  
AT2G38100.1  
AT1G69860.1  
AT1G18880.1  
AT5G01180.1  
Poptr1|58995  
Poptr1|584970  
Poptr1|581442  
Poptr1|545113,Poptr1|551887,Poptr1|591881  
Poptr1|570644  
Poptr1|570645  
Poptr1|565429  
Poptr1|573227  
Poptr1|64607  
Poptr1|349131,Poptr1|553325,Poptr1|553327  
Poptr1|586239  
Poptr1|592897,Poptr1|592902,Poptr1|595332,Poptr1|591174  
Poptr1|683896,Poptr1|570000  
Poptr1|577568  
Poptr1|577570  
Poptr1|65595  
Poptr1|566635  
Poptr1|685837,Poptr1|57910,Poptr1|560338  
Poptr1|684635  
Poptr1|549097,Poptr1|54713  
Poptr1|592630  
Poptr1|555039  
Poptr1|555040  
Poptr1|561761  
Poptr1|578084,Poptr1|588692,Poptr1|578079,Poptr1|594805,Poptr1|578081,Poptr1|578083  
Poptr1|355946  
AT2G43500.1,AT3G59580.1 Poptr1|595829,Poptr1|75355,Poptr1|594604  
AT1G20640.1,AT1G76350.1 Poptr1|346576,Poptr1|52269  
AT4G35270.1,AT2G17150.1 Poptr1|54253  
AT4G24020.1 Poptr1|554523,Poptr1|63391  
AT4G38340.1  
AT1G64530.1  
Poptr1|587907,Poptr1|588113  
Poptr1|593472,Poptr1|62962  
Poptr1|100742,Poptr1|62951,Poptr1|104282  
Poptr1|592933,Poptr1|592936  
Poptr1|108139  
Poptr1|595816  
Poptr1|648927  
Poptr1|642100

AT5G19070.1 Poptr1|725743,Poptr1|686163  
AT1G03260.1  
AT5G48820.1 Poptr1|553160  
AT3G24810.1  
Poptr1|707231,Poptr1|736076  
AT4G23660.1 Poptr1|694374,Poptr1|71817  
AT1G12350.1,AT5G02080.1 Poptr1|72390,Poptr1|710235  
AT4G29120.1 Poptr1|578542  
AT1G71170.1,AT1G71180.1 Poptr1|63864  
AT5G51010.1 Poptr1|586662,Poptr1|570373,Poptr1|575479  
AT2G25680.1 Poptr1|561812,Poptr1|352844  
AT1G80310.1  
AT4G12800.1 Poptr1|732597,Poptr1|684165  
Poptr1|588904  
AT1G65080.1 Poptr1|557194  
AT3G44360.1  
AT3G44370.1  
Poptr1|681255  
AT4G20390.1,AT5G44550.1 Poptr1|699220,Poptr1|642470  
AT4G15610.1 Poptr1|657691  
AT4G03540.1,AT1G03700.1 Poptr1|690033,Poptr1|704531  
AT1G14160.1 Poptr1|661459,Poptr1|345122  
AT4G25040.1 Poptr1|701051,Poptr1|699355  
AT5G06200.1,AT3G11550.1 Poptr1|344534,Poptr1|576556  
AT3G06390.1  
AT5G15290.1  
AT2G36100.1  
AT2G27370.1  
Poptr1|545301,Poptr1|107756,Poptr1|60411  
Poptr1|577690  
Poptr1|65013  
Poptr1|649254,Poptr1|561467  
Poptr1|594929  
AT2G22010.1 Poptr1|718900  
Poptr1|650810  
Poptr1|654869  
AT5G10200.1 Poptr1|71648  
AT5G43120.1 Poptr1|553942  
AT3G50030.1  
Poptr1|654786  
AT5G43130.1 Poptr1|592055,Poptr1|551797,Poptr1|572055  
AT1G27720.1  
Poptr1|551795  
AT3G62790.1,AT2G47690.1 Poptr1|688265,Poptr1|644752  
AT4G30220.1 Poptr1|669444  
Poptr1|670628  
AT2G43810.1,AT3G59810.1 Poptr1|659407,Poptr1|656348  
AT2G38450.1 Poptr1|577098,Poptr1|747761  
AT5G05360.1  
Poptr1|564094  
AT1G21326.1 Poptr1|342372,Poptr1|72565  
AT3G25500.1 Poptr1|732586  
AT2G43800.1 Poptr1|53046  
AT3G05470.1 Poptr1|581870  
AT1G24150.1,AT1G70140.1 Poptr1|354841,Poptr1|565390  
AT5G54650.1 Poptr1|571466,Poptr1|569060  
AT5G48360.1,AT3G07540.1  
AT5G67470.1  
AT1G59910.1  
AT4G15200.1  
Poptr1|553139  
Poptr1|553138  
Poptr1|668286  
Poptr1|587955,Poptr1|575096  
Poptr1|654561  
AT2G41490.1,AT3G57220.1 Poptr1|576224,Poptr1|560449  
AT5G16490.1 Poptr1|552841,Poptr1|572895,Poptr1|665574,Poptr1|703863  
AT1G27380.1  
AT5G04500.1 Poptr1|725157  
AT5G22950.1 Poptr1|584444  
AT3G45000.1  
AT5G63280.1 Poptr1|575298  
AT5G40710.1  
AT1G12730.1,AT1G63110.1 Poptr1|691154  
AT5G21050.1 Poptr1|594917,Poptr1|556864  
AT5G64090.1 Poptr1|548760,Poptr1|553442  
AT2G39810.1 Poptr1|589888  
Poptr1|553900  
AT5G15690.1,AT1G33450.1,AT4G04780.1 Poptr1|647581  
Poptr1|660215  
Poptr1|568001  
AT3G07950.1 Poptr1|655923,Poptr1|659857

AT2G16770.1,AT4G35040.1 Poptr1|649217,Poptr1|648793  
AT4G18810.1 Poptr1|693986  
AT4G29905.1,AT5G57123.1 Poptr1|560648,Poptr1|58813  
Poptr1|563464  
AT1G48860.1,AT2G45300.1 Poptr1|700153,Poptr1|552035  
AT3G62570.1,AT2G47440.1,AT4G02100.1 Poptr1|57182,Poptr1|692267  
AT1G02650.1  
AT1G71310.1 Poptr1|581016  
AT5G47870.1 Poptr1|693302,Poptr1|690997  
AT1G19600.1 Poptr1|692926,Poptr1|651950  
Poptr1|680482  
AT3G19740.1,AT1G50140.1 Poptr1|655012  
AT4G02480.1,AT1G02890.1 Poptr1|57220,Poptr1|684288  
AT1G64110.2 Poptr1|569441,Poptr1|580581  
AT4G24860.1,AT1G62130.1  
AT4G28000.1  
Poptr1|650906  
Poptr1|662137,Poptr1|666645  
Poptr1|548395  
Poptr1|646683  
AT2G44860.1 Poptr1|594829,Poptr1|697123  
AT3G08930.2,AT5G01460.1 Poptr1|560909,Poptr1|701613  
AT5G03990.1 Poptr1|560451  
AT3G51940.1 Poptr1|587827  
Poptr1|561977,Poptr1|64227  
AT4G23020.1,AT4G11780.1 Poptr1|554304,Poptr1|548521,Poptr1|350164  
AT1G68330.1 Poptr1|555862,Poptr1|564544  
AT1G67050.1  
AT5G38320.1  
AT5G58100.1 Poptr1|584533,Poptr1|695456  
Poptr1|584532  
Poptr1|585013  
AT1G64700.1 Poptr1|569284,Poptr1|550444,Poptr1|342845,Poptr1|595243,Poptr1|572458  
AT3G61920.1  
AT1G11930.1 Poptr1|99331  
AT4G26860.1  
Poptr1|574708  
AT2G01220.2,AT3G27610.1 Poptr1|55254  
Poptr1|107389  
AT2G20510.1,AT2G36070.1 Poptr1|551037,Poptr1|694761  
AT5G27600.1 Poptr1|570831  
AT3G05970.1 Poptr1|55144  
AT1G77590.1 Poptr1|643628  
AT2G47240.1 Poptr1|348377  
AT2G04350.1 Poptr1|573121  
AT4G11030.1,AT4G23850.1 Poptr1|709180,Poptr1|684846  
AT1G49430.1 Poptr1|686725  
AT1G64400.1  
Poptr1|716651  
Poptr1|581720,Poptr1|596326  
Poptr1|596324  
Poptr1|556419  
AT5G24655.1,AT3G49580.1,AT5G24660.1,AT3G49570.1 Poptr1|666013,Poptr1|341979  
AT3G49410.1,AT5G24450.1 Poptr1|562090,Poptr1|58291  
Poptr1|104962  
AT5G14460.1 Poptr1|549571  
Poptr1|585705  
AT1G68310.1 Poptr1|682069,Poptr1|590069  
AT3G09380.1  
Poptr1|703415  
AT3G13120.1 Poptr1|728016,Poptr1|550190  
AT4G21540.1 Poptr1|568293  
AT5G43970.1 Poptr1|692003  
AT1G04070.1  
AT3G58180.1 Poptr1|694749,Poptr1|684601  
AT3G62530.1  
AT1G04630.1,AT2G33220.1 Poptr1|548007,Poptr1|712458  
AT1G09030.1 Poptr1|60600,Poptr1|664477,Poptr1|570816  
AT4G14540.1 Poptr1|732465,Poptr1|734465  
AT2G13570.1 Poptr1|650623  
AT3G53340.1,AT2G37060.1 Poptr1|576644  
AT2G47810.1  
AT5G47640.1  
Poptr1|652363  
Poptr1|654861,Poptr1|550206  
Poptr1|650804  
Poptr1|659811,Poptr1|655971  
AT4G31805.1 Poptr1|561987,Poptr1|578278  
AT5G10890.1  
AT5G06130.2 Poptr1|344540  
AT5G61670.1 Poptr1|588169  
AT5G09650.1 Poptr1|707491,Poptr1|557583

AT5G40610.1 Poptr1|577494  
Poptr1|104686  
AT2G24820.1 Poptr1|578316,Poptr1|562022  
Poptr1|669200  
Poptr1|597760  
AT5G63440.2 Poptr1|570244,Poptr1|733598  
AT1G22700.1 Poptr1|738870  
Poptr1|671967  
AT2G44160.1,AT3G59970.3 Poptr1|704929,Poptr1|654300  
AT5G27010.1,AT5G06350.1 Poptr1|548769  
AT4G04680.1  
Poptr1|568604  
AT5G44740.2 Poptr1|350452  
AT2G19580.1 Poptr1|717525  
AT3G12090.1 Poptr1|720187,Poptr1|698651  
AT5G57810.1 Poptr1|352407,Poptr1|578678  
AT5G46700.1 Poptr1|689481,Poptr1|646253  
AT1G63260.1 Poptr1|709387  
AT5G60220.1,AT3G45600.1 Poptr1|686918  
AT4G30430.1,AT2G23810.1 Poptr1|578676,Poptr1|685617  
AT4G23410.1  
AT2G01960.1  
AT4G28050.1  
AT1G18520.1,AT5G23030.1  
AT2G03840.1  
Poptr1|672246  
Poptr1|590132  
Poptr1|596447  
AT3G20630.1 Poptr1|582070  
Poptr1|568982  
Poptr1|568981  
AT2G27310.1 Poptr1|595165,Poptr1|679894  
AT2G36090.1  
AT1G05180.1,AT2G32410.1 Poptr1|684210  
AT3G25880.1  
AT3G55220.1,AT3G55200.1 Poptr1|353486  
AT3G47610.1 Poptr1|569973  
Poptr1|554744  
Poptr1|581112,Poptr1|580072  
Poptr1|594113  
AT5G55760.1 Poptr1|49394  
AT5G42300.1 Poptr1|682456  
AT3G45180.1 Poptr1|680026  
Poptr1|724996  
AT1G51260.1 Poptr1|706292  
AT3G57650.1 Poptr1|688714,Poptr1|717417  
AT5G60700.1 Poptr1|54825,Poptr1|595071  
AT1G28200.1 Poptr1|551629,Poptr1|559032  
AT5G08350.1,AT5G23360.1,AT5G23350.1,AT5G23370.1  
Poptr1|71767,Poptr1|71771,Poptr1|71766,Poptr1|595808,Poptr1|705579,Poptr1|562765  
AT5G13200.1 Poptr1|711959,Poptr1|554717,Poptr1|350567,Poptr1|711958  
AT4G40100.1,AT2G22475.1  
Poptr1|710358  
Poptr1|591614,Poptr1|595809  
Poptr1|555574  
Poptr1|75899  
Poptr1|591269,Poptr1|647774,Poptr1|704985,Poptr1|647773  
Poptr1|592120,Poptr1|65017  
Poptr1|554719  
AT1G65650.1 Poptr1|577549,Poptr1|545782  
AT5G16310.1  
AT4G17510.1 Poptr1|646152  
AT3G54860.1 Poptr1|686542  
Poptr1|567651  
Poptr1|567652  
AT3G16310.1 Poptr1|683768  
AT1G24050.1 Poptr1|721090,Poptr1|687123  
AT1G70220.1  
AT2G24500.1,AT4G31420.2 Poptr1|745302,Poptr1|689089  
AT2G39080.1 Poptr1|721040  
AT5G47680.1 Poptr1|734461,Poptr1|560099  
AT1G29820.1,AT1G29830.1 Poptr1|61281  
AT2G42950.1  
AT3G12630.1 Poptr1|722755  
AT1G51200.1 Poptr1|704716,Poptr1|576317,Poptr1|547885,Poptr1|682028  
AT2G27580.1 Poptr1|713463,Poptr1|649133  
AT1G12440.1 Poptr1|712074,Poptr1|548563  
AT3G52800.1,AT2G36320.1  
AT4G12040.1,AT4G22820.1  
Poptr1|569186  
Poptr1|695940  
AT4G38225.3 Poptr1|595020

Poptr1|579750  
AT1G55460.1 Poptr1|719835,Poptr1|567434  
AT5G51795.1  
Poptr1|101234  
AT4G13750.1 Poptr1|691695  
AT1G78910.1 Poptr1|681053  
Poptr1|681052  
AT4G36210.1,AT2G18100.1 Poptr1|563247  
AT1G67660.1 Poptr1|565926  
AT1G13810.1 Poptr1|698659  
AT4G15910.1 Poptr1|697817  
AT1G02820.1,AT4G02380.1 Poptr1|731798,Poptr1|710544  
AT3G53770.1  
AT3G16785.1 Poptr1|697803,Poptr1|703720  
Poptr1|570751  
AT1G32130.1 Poptr1|349939,Poptr1|689497  
AT4G19000.1  
Poptr1|676610  
AT1G08660.1 Poptr1|572878  
AT3G48820.1 Poptr1|688555  
Poptr1|570329  
AT1G28230.1,AT1G28220.1,AT2G33750.1 Poptr1|51910  
AT4G18195.1,AT4G18210.1,AT4G18220.1 Poptr1|641547,Poptr1|64723  
AT1G44750.1 Poptr1|591810  
AT2G24220.1 Poptr1|695220  
AT1G30840.1 Poptr1|48625,Poptr1|554629  
AT4G18197.1,AT4G18205.1  
AT1G19770.1  
AT4G18190.1  
AT4G08700.1,AT5G41160.1  
AT1G57990.1,AT1G57980.1,AT1G09860.1,AT1G57943.1  
AT1G75470.1  
Poptr1|347409  
Poptr1|577355  
Poptr1|585404  
Poptr1|590480,Poptr1|553184  
Poptr1|589957  
Poptr1|578747  
AT2G20060.1 Poptr1|99345  
Poptr1|660280  
AT1G48605.1,AT3G18030.1 Poptr1|575291  
AT5G50210.1 Poptr1|575248  
Poptr1|570168  
AT1G56420.1 Poptr1|662610  
AT1G12530.1 Poptr1|350143  
AT5G61760.1,AT5G07370.1 Poptr1|666792,Poptr1|662275  
AT4G21560.1,AT4G05000.1 Poptr1|687498,Poptr1|555508  
AT5G42890.1 Poptr1|551855,Poptr1|683223  
Poptr1|568397  
AT5G48840.1 Poptr1|348951  
Poptr1|108186  
AT1G56310.1 Poptr1|97812  
Poptr1|576687  
AT5G35730.1 Poptr1|562310  
AT2G32295.1  
Poptr1|59756  
AT4G23040.1,AT4G11740.1 Poptr1|554317,Poptr1|683697  
AT4G00752.1  
Poptr1|730970  
AT4G14385.1 Poptr1|710685,Poptr1|694759  
AT4G23540.1 Poptr1|351513  
AT4G26530.1 Poptr1|582569,Poptr1|550631  
AT2G21330.1,AT4G38970.1 Poptr1|713130,Poptr1|53423,Poptr1|649324  
AT2G01140.1 Poptr1|656861,Poptr1|658829  
AT3G52930.1,AT2G36460.1 Poptr1|578574,Poptr1|580511  
AT4G26520.1  
AT5G03690.1  
Poptr1|593043  
AT2G37690.1 Poptr1|699848,Poptr1|586808  
AT2G05140.1  
AT5G55220.1 Poptr1|575052  
AT1G20816.1,AT1G76405.2 Poptr1|559984  
Poptr1|567107,Poptr1|554772  
AT2G27490.1 Poptr1|55541  
Poptr1|590765  
AT2G31940.1 Poptr1|558142,Poptr1|704678  
AT5G19875.1 Poptr1|555243,Poptr1|547644  
AT4G35335.1 Poptr1|735766  
AT5G41760.1 Poptr1|709200,Poptr1|684856  
AT4G38260.1 Poptr1|741857  
AT1G20740.1,AT1G20680.1  
Poptr1|73164

AT3G57450.1 Poptr1|569470,Poptr1|576357,Poptr1|560503  
Poptr1|582677,Poptr1|650002  
AT2G26500.1 Poptr1|591873,Poptr1|673134,Poptr1|744203,Poptr1|673024  
Poptr1|644167  
AT3G05570.1,AT4G39235.1 Poptr1|559509,Poptr1|643360,Poptr1|546663  
AT2G21640.1  
AT1G47710.1 Poptr1|591883  
AT2G35580.1  
AT1G63280.1,AT1G64030.1,AT2G14540.1,AT1G62170.1  
AT2G25240.1,AT2G26390.1,AT3G45220.1  
AT1G51330.1  
AT1G64020.1  
AT1G64010.1  
Poptr1|582701,Poptr1|583867  
Poptr1|591882  
Poptr1|569877  
Poptr1|99276  
AT5G15770.1 Poptr1|578528  
Poptr1|587380  
AT5G60620.1 Poptr1|697143,Poptr1|713446  
AT4G10180.1 Poptr1|571954  
AT5G58110.1 Poptr1|584523,Poptr1|716990  
AT1G69190.1,AT4G30000.1 Poptr1|564314  
Poptr1|586468  
AT2G03870.1 Poptr1|641383,Poptr1|722752  
AT3G14080.1 Poptr1|745824,Poptr1|685057  
AT1G19120.1  
AT2G31725.1,AT1G05730.1 Poptr1|745038  
AT2G43720.1  
AT1G05740.1  
AT3G21865.1 Poptr1|679507,Poptr1|562308  
Poptr1|698125  
AT3G12590.1 Poptr1|656066  
Poptr1|656064,Poptr1|659713  
Poptr1|656065  
Poptr1|659712  
AT3G08950.1 Poptr1|576993  
AT4G39740.1 Poptr1|715909,Poptr1|562617  
AT1G80520.1,AT1G15760.1 Poptr1|592679,Poptr1|640829  
AT2G12462.1 Poptr1|672956  
AT1G25350.1 Poptr1|354186  
AT5G19720.1  
Poptr1|106667  
AT5G58410.1 Poptr1|665950  
Poptr1|665949  
AT3G61140.1 Poptr1|700184,Poptr1|684348  
AT3G12850.1  
AT5G51340.1 Poptr1|665895  
Poptr1|571943  
Poptr1|665894  
AT5G64560.1 Poptr1|687079,Poptr1|354547  
AT2G03620.1 Poptr1|698367,Poptr1|564302  
AT1G80900.1,AT1G16010.1 Poptr1|554895,Poptr1|587197  
AT3G19640.1 Poptr1|697395  
AT4G28580.1,AT3G58970.1 Poptr1|351736  
AT5G09720.1,AT5G09690.2  
AT5G09710.1  
Poptr1|562545,Poptr1|562546  
Poptr1|642113  
Poptr1|591486,Poptr1|591503  
Poptr1|584520  
ATMG00510.1,ATCG01110.1 Poptr1|730200  
Poptr1|559329  
Poptr1|562822  
Poptr1|594176  
AT3G24090.1 Poptr1|58955  
Poptr1|588931  
AT3G01860.1 Poptr1|691633,Poptr1|565883  
AT3G27210.1  
Poptr1|354664  
AT1G72550.1 Poptr1|730089,Poptr1|704600  
AT5G58250.1 Poptr1|729291  
AT2G41770.1,AT3G57420.1 Poptr1|560505,Poptr1|688722  
AT1G47720.1 Poptr1|591886,Poptr1|551884  
Poptr1|72830,Poptr1|551099  
AT1G75460.1,AT1G19740.1 Poptr1|342203,Poptr1|559785  
AT1G01360.1,AT4G01026.1 Poptr1|554482,Poptr1|572380,Poptr1|692363,Poptr1|640369  
AT2G38310.1 Poptr1|656301,Poptr1|567217,Poptr1|668108,Poptr1|653167  
AT5G53160.2 Poptr1|666182,Poptr1|661473  
AT5G46790.1,AT4G17870.1 Poptr1|590008,Poptr1|60228  
AT2G26040.1 Poptr1|561675,Poptr1|668806  
AT5G05440.1

AT5G45860.1,AT5G45870.1,AT2G40330.1,AT4G18620.1  
 AT4G27920.1  
 AT1G73000.1  
 AT4G30530.1,AT2G23960.1,AT2G23970.1,AT4G30540.1,AT4G30550.1 Poptr1|737930  
     Poptr1|686781  
 AT4G25120.1 Poptr1|100910  
 AT1G61620.1 Poptr1|544927,Poptr1|568327,Poptr1|588334  
 AT4G11120.1 Poptr1|732536  
 AT2G18770.1,AT5G05670.1 Poptr1|550873  
     Poptr1|650565  
 AT4G31040.1 Poptr1|99220,Poptr1|344220  
 AT1G06950.1 Poptr1|574507,Poptr1|700079  
 AT1G30380.1 Poptr1|654145,Poptr1|737207  
 AT4G22200.1 Poptr1|685078  
 AT3G02850.1 Poptr1|343059,Poptr1|545510  
 AT4G32500.1,AT2G25600.1 Poptr1|561851,Poptr1|705131,Poptr1|685674  
 AT4G18290.1,AT5G46240.1 Poptr1|714514  
 AT4G32650.1 Poptr1|344691,Poptr1|701980  
 AT5G37500.1  
 AT2G26650.1  
     Poptr1|591183,Poptr1|661341  
     Poptr1|570612  
     Poptr1|594790,Poptr1|588851,Poptr1|103080  
 AT5G42320.1 Poptr1|694901  
     Poptr1|642829  
     Poptr1|642828  
 AT3G17910.1 Poptr1|345791  
 AT1G48510.1  
     Poptr1|355466  
     Poptr1|590410  
 AT2G30570.1 Poptr1|643207,Poptr1|651851  
 AT3G19900.1 Poptr1|659312  
 AT5G43430.1 Poptr1|675322  
     Poptr1|104512  
 AT1G10840.1 Poptr1|732129,Poptr1|552842  
 AT3G08920.1 Poptr1|695377  
 AT4G24750.1 Poptr1|575256  
     Poptr1|570173  
 AT3G10350.1 Poptr1|563717,Poptr1|725022  
 AT5G60730.1  
 AT1G74530.3 Poptr1|736952  
     Poptr1|668865  
 AT4G21700.1 Poptr1|97167  
     Poptr1|580121  
 AT5G60720.1 Poptr1|697741  
 AT5G66600.1 Poptr1|563076,Poptr1|558811  
 AT5G47380.1 Poptr1|589869  
 AT3G18900.1  
 AT1G43020.1,AT1G76620.1  
 AT2G23700.1  
     Poptr1|557301,Poptr1|546651  
 AT1G66080.1 Poptr1|714225  
 AT5G61500.1 Poptr1|740021,Poptr1|646403  
 AT3G17810.1 Poptr1|580617  
     Poptr1|585842,Poptr1|661339  
 AT1G09815.1 Poptr1|571392,Poptr1|58934  
 AT1G73430.1 Poptr1|723872  
     Poptr1|589352  
     Poptr1|587703  
 AT4G15802.1 Poptr1|572716,Poptr1|745899,Poptr1|697856  
 AT4G22340.3 Poptr1|584754  
 AT1G62430.1  
 AT4G26770.1  
 AT2G16500.1,AT4G34710.1 Poptr1|713160  
 ATCG00470.1 Poptr1|747580,Poptr1|591357,Poptr1|595929  
     Poptr1|558086  
 AT4G21750.1,AT4G04890.1 Poptr1|568199,Poptr1|546357  
 AT1G79840.1 Poptr1|685013,Poptr1|64014  
 AT4G00730.1 Poptr1|552123  
 AT1G05230.1 Poptr1|684208,Poptr1|700555  
 AT5G46880.1 Poptr1|356671,Poptr1|554054  
 AT1G17920.1,AT1G73360.1 Poptr1|687671,Poptr1|97015  
 AT3G61150.1  
 AT2G32370.1  
 AT4G17710.1  
     Poptr1|571504  
     Poptr1|356260,Poptr1|575800  
     Poptr1|592887,Poptr1|546547  
 AT2G44040.1,AT3G59890.1 Poptr1|654319,Poptr1|746315  
 AT1G61780.1 Poptr1|713554  
     Poptr1|568211  
 AT3G29170.1 Poptr1|652748

Poptr1|576340  
 AT5G40660.1 Poptr1|549616  
 AT5G06120.1 Poptr1|350939,Poptr1|48484  
 Poptr1|584424  
 AT2G39020.1,AT2G39030.1 Poptr1|720703,Poptr1|567633  
 Poptr1|675200  
 Poptr1|353365  
 AT4G36195.1,AT4G36190.1 Poptr1|747339,Poptr1|655419  
 AT2G18080.1  
 Poptr1|678722  
 AT1G01200.1 Poptr1|552312  
 AT2G31680.1,AT1G05810.1 Poptr1|645125,Poptr1|572932  
 AT3G18820.1 Poptr1|722061,Poptr1|712937  
 AT5G03530.1 Poptr1|676093,Poptr1|735561  
 AT3G16100.1,AT1G52280.1 Poptr1|548847,Poptr1|693701  
 AT4G35860.1 Poptr1|648984  
 AT2G44610.1 Poptr1|684390  
 AT2G22290.1 Poptr1|71637  
 AT4G09720.1 Poptr1|710590,Poptr1|694649  
 AT3G46060.1,AT5G59840.1,AT3G53610.1 Poptr1|706225  
 AT1G02130.1 Poptr1|589905,Poptr1|692478,Poptr1|646160,Poptr1|591766,Poptr1|708992  
 AT1G18200.1,AT1G73640.1 Poptr1|688451  
 AT4G17170.1 Poptr1|685887  
 AT5G65270.1 Poptr1|695871,Poptr1|650703  
 AT4G18800.1,AT5G45750.1 Poptr1|555641,Poptr1|699015  
 AT3G11730.1 Poptr1|742527,Poptr1|704698  
 AT1G43890.1 Poptr1|694280,Poptr1|718600  
 AT3G54840.1 Poptr1|720578,Poptr1|659917  
 AT5G60860.1,AT3G15060.1 Poptr1|582783,Poptr1|574368  
 AT5G45130.1,AT4G19640.1 Poptr1|575530,Poptr1|705044  
 AT5G47520.1 Poptr1|701233  
 AT5G59150.1,AT3G46830.1 Poptr1|690265,Poptr1|560047  
 AT3G12160.1 Poptr1|98707,Poptr1|57969  
 AT1G09630.1 Poptr1|704700,Poptr1|596757  
 AT4G07524.1  
 AT2G43130.1  
 AT3G07410.1  
 AT1G49300.1  
 AT3G09910.1  
 AT5G64990.1  
 AT4G39890.1  
 AT5G10260.1  
 AT1G22740.1  
 AT5G39620.1,AT2G21880.1  
 AT4G17530.1,AT5G47200.1  
 AT4G17160.1  
 AT4G39990.1  
 AT1G16920.1  
 AT1G06400.1  
 AT4G18430.1  
 AT4G08190.1  
 AT4G03156.1,AT1G07410.1  
 Poptr1|563669,Poptr1|567684  
 Poptr1|704012  
 Poptr1|588884  
 Poptr1|562725,Poptr1|558629  
 Poptr1|723340  
 Poptr1|656054,Poptr1|659728  
 Poptr1|744799  
 Poptr1|581000  
 Poptr1|669971  
 Poptr1|710917,Poptr1|551379  
 Poptr1|705009  
 Poptr1|691859  
 Poptr1|104794  
 Poptr1|555731  
 Poptr1|685021,Poptr1|669300  
 Poptr1|706463  
 AT3G61490.1 Poptr1|712603,Poptr1|552198,Poptr1|548424  
 AT1G19170.1 Poptr1|589311  
 AT4G23820.1 Poptr1|646742  
 AT4G33440.1 Poptr1|71523,Poptr1|562469  
 AT3G62110.1 Poptr1|572522,Poptr1|552618  
 AT3G16850.1 Poptr1|565505,Poptr1|703717  
 AT4G23500.1  
 AT3G42950.1  
 AT5G41870.1  
 AT3G06770.2,AT5G49215.1  
 Poptr1|592125  
 Poptr1|575063  
 AT5G62790.1 Poptr1|728585,Poptr1|733322  
 AT3G52630.1,AT4G18590.1 Poptr1|695171,Poptr1|680539,Poptr1|596230



Poptr1|660157  
ATCG00020.1 Poptr1|582871,Poptr1|591294  
Poptr1|592415  
Poptr1|587181  
AT3G16190.1 Poptr1|645969  
Poptr1|675257  
AT1G50940.1 Poptr1|569098  
Poptr1|104513  
AT5G64816.1 Poptr1|643870,Poptr1|593067,Poptr1|651197  
Poptr1|571623  
AT1G19370.1,AT1G75140.1 Poptr1|573243  
AT3G57400.1,AT5G52500.1 Poptr1|351514,Poptr1|667472  
AT1G64520.1 Poptr1|640320,Poptr1|554520  
AT5G42040.1  
AT3G14830.1,AT1G53450.1 Poptr1|55914,Poptr1|585503  
Poptr1|593317  
AT2G20680.1,AT4G28320.1 Poptr1|672273  
AT5G01930.1 Poptr1|577200,Poptr1|352004  
AT5G66460.1 Poptr1|655340,Poptr1|593912  
AT3G10890.1,AT3G10900.1,AT3G30540.1  
Poptr1|575960,Poptr1|344002  
Poptr1|346792,Poptr1|651956  
Poptr1|552401  
Poptr1|592385  
AT3G47980.1,AT5G62720.1 Poptr1|733150  
Poptr1|569997  
AT1G04635.1 Poptr1|740698,Poptr1|574618,Poptr1|732715  
AT2G11890.1 Poptr1|98744,Poptr1|702282  
Poptr1|647295  
AT1G31660.1 Poptr1|98376,Poptr1|660883  
AT4G39160.1 Poptr1|565761  
AT4G33590.1,AT4G33600.1 Poptr1|577350,Poptr1|75552  
Poptr1|347439  
AT3G13420.1,AT1G55535.1 Poptr1|555172,Poptr1|708243  
AT1G20575.1 Poptr1|709812  
Poptr1|652203  
AT2G28780.1 Poptr1|558098,Poptr1|549195  
AT3G09450.1  
Poptr1|344227  
AT5G13570.1 Poptr1|567608,Poptr1|563741  
AT2G18370.1 Poptr1|672717,Poptr1|558133,Poptr1|60844  
AT3G08770.1,AT5G01870.1 Poptr1|668195,Poptr1|555974,Poptr1|577170,Poptr1|555975  
AT3G51590.1,AT5G59310.1,AT5G59320.1  
AT2G38540.1  
AT4G33355.1  
Poptr1|568169  
AT2G42070.1 Poptr1|576252  
Poptr1|580964  
Poptr1|561250  
Poptr1|561251  
AT5G25940.1 Poptr1|556994,Poptr1|713459  
AT5G53450.1 Poptr1|104351  
Poptr1|586711  
Poptr1|574778,Poptr1|574784  
Poptr1|590767  
Poptr1|574781  
Poptr1|593333  
AT3G22530.1,AT4G14830.1 Poptr1|591341,Poptr1|564853,Poptr1|55124  
Poptr1|551157  
AT4G35760.1 Poptr1|593776  
AT1G29060.1,AT4G14600.1 Poptr1|643834,Poptr1|651229  
AT5G07020.1 Poptr1|555091  
Poptr1|639793,Poptr1|673667  
AT3G60520.1 Poptr1|692453,Poptr1|703018  
AT1G02070.1  
AT3G04820.1 Poptr1|595444  
Poptr1|105497  
Poptr1|594105  
AT1G32210.1,AT2G35520.2 Poptr1|590059,Poptr1|646295  
AT1G27920.1 Poptr1|548013,Poptr1|712063  
AT5G51600.1 Poptr1|575701,Poptr1|728972  
AT5G55230.1,AT4G26760.1 Poptr1|550106,Poptr1|568577  
AT2G38720.1 Poptr1|555095  
AT2G01910.1  
AT3G60840.1  
AT5G62250.1  
AT1G14690.1  
AT2G30115.1  
Poptr1|673664,Poptr1|595390,Poptr1|660284  
Poptr1|670179  
Poptr1|572112  
Poptr1|547782

Poptr1|62862  
AT1G71750.1 Poptr1|651633  
Poptr1|585207  
AT4G34270.1 Poptr1|686748,Poptr1|49309  
AT3G27325.1 Poptr1|549619  
Poptr1|641718  
Poptr1|549620  
AT5G27380.1 Poptr1|570889,Poptr1|59979  
AT2G31945.1,AT1G05575.1 Poptr1|723381,Poptr1|672704  
Poptr1|547657,Poptr1|555253  
AT3G03420.1 Poptr1|553047,Poptr1|64862  
AT3G52090.1 Poptr1|722673  
Poptr1|64535  
AT1G22800.1 Poptr1|740809  
Poptr1|679480  
Poptr1|679477  
AT3G13870.1,AT1G72960.1 Poptr1|740944,Poptr1|742864  
AT5G45160.1 Poptr1|701096  
Poptr1|575528  
Poptr1|596354,Poptr1|588458  
Poptr1|586726,Poptr1|701095,Poptr1|588456,Poptr1|588457,Poptr1|101087,Poptr1|596356,Poptr1|58816  
1,Poptr1|1101098,Poptr1|588459  
Poptr1|596355,Poptr1|588159  
Poptr1|101085,Poptr1|100192,Poptr1|100190,Poptr1|586725  
Poptr1|100191,Poptr1|100200,Poptr1|101091  
Poptr1|584838,Poptr1|579253,Poptr1|588160,Poptr1|101097  
Poptr1|101086  
Poptr1|101088,Poptr1|100197  
Poptr1|101090  
Poptr1|579252  
AT1G27385.1 Poptr1|63134,Poptr1|554782  
AT5G12950.1,AT5G12960.1 Poptr1|350793,Poptr1|708569  
AT2G02570.1 Poptr1|596786  
Poptr1|672802  
AT3G20650.1 Poptr1|699128  
Poptr1|663316  
Poptr1|663315  
AT2G13440.1 Poptr1|558441  
Poptr1|562494  
Poptr1|108765  
AT3G52610.1 Poptr1|352501,Poptr1|576579  
Poptr1|561484  
AT4G20850.1 Poptr1|687852  
Poptr1|575833  
AT1G18335.1 Poptr1|569381  
Poptr1|580634  
AT3G53140.1 Poptr1|702783  
AT5G54160.1 Poptr1|661631,Poptr1|574641  
AT5G37170.1,AT1G21130.1,AT1G21100.1,AT1G62900.1,AT1G21110.1,AT1G63140.2,AT5G53810.1,AT1G77530.1,AT  
1G76790.1,AT1G21120.1,AT1G77520.1  
AT1G51990.1  
Poptr1|707948,Poptr1|56062  
Poptr1|579574,Poptr1|688207,Poptr1|348174,Poptr1|552360  
Poptr1|551395  
Poptr1|580042  
Poptr1|72518  
Poptr1|574287  
Poptr1|572473  
AT2G19940.1 Poptr1|581467  
AT1G51650.1 Poptr1|567814,Poptr1|563472  
AT3G13330.1 Poptr1|691973,Poptr1|98109  
Poptr1|48232,Poptr1|46411  
AT5G23300.1 Poptr1|685192  
Poptr1|53242  
AT5G23710.1 Poptr1|577782,Poptr1|547588  
Poptr1|555189  
Poptr1|678449  
AT4G00755.1 Poptr1|644393,Poptr1|663890  
Poptr1|572177  
AT3G03305.1 Poptr1|564112,Poptr1|567187  
AT5G58160.1 Poptr1|353016  
AT2G25050.1  
AT3G32410.1  
AT1G31810.1  
Poptr1|738018  
AT4G01560.1 Poptr1|644687,Poptr1|731491  
Poptr1|592750,Poptr1|679745  
AT2G26680.1 Poptr1|684426,Poptr1|592056,Poptr1|572054  
AT4G26900.1 Poptr1|722769  
Poptr1|641366  
AT5G59220.1 Poptr1|54733,Poptr1|549127  
AT3G11410.1 Poptr1|567380,Poptr1|720383

AT1G17550.1,AT1G72770.1 Poptr1|695111  
AT1G07430.1,AT2G29380.1  
AT4G26080.1,AT5G57050.1  
AT1G17545.1  
Poptr1|548344  
Poptr1|712415  
Poptr1|675255  
Poptr1|645770,Poptr1|675254  
Poptr1|577878  
Poptr1|681653  
AT1G02280.1 Poptr1|688213,Poptr1|644696  
AT5G20300.1 Poptr1|583669,Poptr1|578875  
AT2G16640.1,AT3G16620.1 Poptr1|721779,Poptr1|713241,Poptr1|721785  
AT4G02510.1 Poptr1|587306,Poptr1|565600  
AT5G05000.1  
AT4G02482.1  
AT4G15810.1  
Poptr1|639943,Poptr1|64650  
Poptr1|579872  
Poptr1|592201  
Poptr1|569786  
Poptr1|100462  
Poptr1|565604  
Poptr1|588507  
AT2G01190.1 Poptr1|354204,Poptr1|566565  
AT5G63130.1,AT3G48240.1 Poptr1|699415,Poptr1|666525  
AT1G70640.1 Poptr1|565159,Poptr1|697974  
AT4G05150.1 Poptr1|555470,Poptr1|568318  
AT5G09620.1,AT5G64430.1 Poptr1|642169,Poptr1|649767  
AT1G25300.1  
AT3G26510.5  
Poptr1|553762,Poptr1|547562,Poptr1|596116,Poptr1|354454  
Poptr1|345824  
Poptr1|583744  
Poptr1|347495  
AT5G56270.1 Poptr1|691986,Poptr1|744845  
AT2G38470.1 Poptr1|560961,Poptr1|577093,Poptr1|571865,Poptr1|665964  
AT1G29280.1 Poptr1|693984  
AT5G26170.1 Poptr1|716910  
AT4G39410.1 Poptr1|716011,Poptr1|686013  
AT2G37260.1 Poptr1|589375  
AT1G69310.1 Poptr1|566947,Poptr1|656500  
AT1G13960.1,AT2G03340.1 Poptr1|687255,Poptr1|345136  
AT5G64810.1 Poptr1|75851,Poptr1|75852,Poptr1|71737  
AT3G56400.1,AT2G40750.1 Poptr1|701688,Poptr1|560994,Poptr1|571679  
AT4G18170.1,AT5G46350.1 Poptr1|674772,Poptr1|594801,Poptr1|72693,Poptr1|692798  
AT5G13080.1 Poptr1|597140,Poptr1|640058,Poptr1|712451,Poptr1|64975  
AT2G44745.1 Poptr1|711034,Poptr1|591760  
AT2G34830.1,AT1G30650.1 Poptr1|550564  
AT2G30590.1 Poptr1|692880,Poptr1|685380,Poptr1|571055,Poptr1|689825  
AT4G30935.1 Poptr1|578746  
AT4G01250.1 Poptr1|348016,Poptr1|688168  
AT4G24240.1 Poptr1|655096,Poptr1|684417,Poptr1|703142  
AT2G46130.1 Poptr1|57054,Poptr1|348021  
AT1G80840.1 Poptr1|693208,Poptr1|587210,Poptr1|669155  
AT2G04880.1 Poptr1|573073,Poptr1|552691  
AT4G26640.2 Poptr1|727942,Poptr1|550164  
AT5G49520.1 Poptr1|698327  
AT5G43290.1 Poptr1|560775,Poptr1|576808  
AT2G47260.1 Poptr1|664330,Poptr1|692253  
AT1G55600.1  
AT4G26440.1  
AT5G07100.1  
AT2G30250.1  
AT3G58710.1  
AT2G21900.1  
AT1G80590.1,AT1G66560.1,AT1G66600.1,AT5G01900.1,AT1G66550.1,AT5G22570.1  
AT1G29860.1  
AT3G01970.1  
AT5G45270.1  
AT5G28650.1,AT3G04670.1  
AT2G23320.1  
AT1G64000.1,AT5G41570.1  
AT2G25000.1  
AT3G32090.1  
AT3G62340.1  
Poptr1|574062,Poptr1|596971  
Poptr1|574063  
Poptr1|555180  
Poptr1|545872,Poptr1|577692  
Poptr1|590547  
Poptr1|662175,Poptr1|575385

Poptr1|353019  
Poptr1|646672  
Poptr1|685229  
Poptr1|344767  
Poptr1|696640  
AT3G12240.1,AT5G36180.1,AT2G22970.1,AT3G12220.1,AT1G73310.1,AT1G73280.1,AT3G12203.1,AT3G12230.1,AT1G33540.1,AT3G10450.1,AT2G22920.2,AT1G73290.1,AT1G73270.1,AT2G22980.1,AT2G22990.3,AT2G23010.1,AT2G23000.1,AT1G73300.1,AT5G09640.1 Poptr1|60739  
AT2G22960.1  
Poptr1|49329,Poptr1|104227  
Poptr1|594321,Poptr1|65310  
Poptr1|592165  
Poptr1|691709  
Poptr1|591502  
AT2G32280.1 Poptr1|741318,Poptr1|654562,Poptr1|670143  
AT4G21310.1 Poptr1|568386,Poptr1|713627  
AT1G11500.1  
AT1G79730.1 Poptr1|553771,Poptr1|64078  
AT2G36470.1 Poptr1|580813,Poptr1|556956  
AT5G28150.1,AT3G04860.1 Poptr1|559564,Poptr1|59949,Poptr1|56629  
AT2G04220.1,AT4G12690.1 Poptr1|562515,Poptr1|51686  
AT5G11000.1 Poptr1|352991,Poptr1|737321  
AT5G48270.1  
AT2G25200.1  
Poptr1|545357  
Poptr1|551162  
Poptr1|550626  
Poptr1|566002,Poptr1|570165,Poptr1|575239  
Poptr1|595456,Poptr1|595454  
AT5G04460.1 Poptr1|725133  
AT1G32530.1,AT2G35330.1 Poptr1|580093,Poptr1|589991  
AT5G54980.1 Poptr1|659718  
AT1G17200.1 Poptr1|699161,Poptr1|691892  
AT3G14380.1  
AT4G39470.1 Poptr1|562731,Poptr1|558633  
AT1G78915.1 Poptr1|563429  
Poptr1|673340,Poptr1|679472  
AT2G43490.1,AT3G59570.1 Poptr1|59788,Poptr1|75358  
Poptr1|587393  
Poptr1|75359  
AT3G02980.1,AT5G16800.2 Poptr1|730252,Poptr1|665408  
AT5G23280.1 Poptr1|654962,Poptr1|558669  
AT3G47620.1 Poptr1|580925,Poptr1|647955  
AT3G27010.1 Poptr1|742842,Poptr1|554743,Poptr1|549725,Poptr1|63164  
AT2G45680.1 Poptr1|644380  
AT2G37000.1 Poptr1|584277,Poptr1|589460  
AT1G72010.1 Poptr1|678125,Poptr1|59007  
AT5G08330.1  
AT3G45150.1  
AT1G69690.1  
AT5G41030.1  
AT1G35560.1  
Poptr1|650493  
Poptr1|554293,Poptr1|548532  
AT5G66980.1 Poptr1|76197  
AT3G53310.1,AT3G06220.1,AT3G06160.1  
AT3G10110.1 Poptr1|557625  
AT1G18320.1  
Poptr1|706629  
AT4G39840.1 Poptr1|558545,Poptr1|562611  
AT3G61570.1,AT2G46180.1 Poptr1|700258,Poptr1|348027  
AT1G22060.1 Poptr1|710899  
Poptr1|651339  
Poptr1|651338  
Poptr1|676111  
Poptr1|682154  
AT1G52080.1 Poptr1|99099,Poptr1|548930  
AT2G36650.1 Poptr1|71862  
Poptr1|349647  
AT4G01400.1 Poptr1|644658  
Poptr1|644657  
AT1G27410.1 Poptr1|588322,Poptr1|571827  
Poptr1|595773  
Poptr1|595772,Poptr1|595771  
AT5G17630.1 Poptr1|663218  
AT5G46110.1 Poptr1|743855,Poptr1|647933  
AT5G54800.1 Poptr1|569101,Poptr1|730359  
AT1G61800.1 Poptr1|544849  
AT3G01550.1 Poptr1|64782  
AT5G33320.1 Poptr1|700933,Poptr1|662012  
AT4G03950.1  
AT1G43310.1

Poptr1|564292  
AT4G27760.1,AT5G53090.1 Poptr1|96962  
AT5G53100.1  
Poptr1|554880  
AT2G39370.1 Poptr1|352539,Poptr1|567506,Poptr1|563827  
AT2G37380.1  
AT1G56270.1  
Poptr1|572068,Poptr1|351861,Poptr1|97898,Poptr1|705371,Poptr1|572066,Poptr1|351864,Poptr1|669968  
AT5G67240.1,AT3G50100.1 Poptr1|562926,Poptr1|591161  
AT5G05540.1,AT3G50090.1  
AT5G25800.1 Poptr1|72542  
Poptr1|551372  
AT5G18700.1 Poptr1|565634  
AT1G33940.1  
Poptr1|657597  
AT5G66910.1,AT5G66900.1 Poptr1|76151,Poptr1|76154,Poptr1|563015  
AT5G66890.1  
Poptr1|563014  
AT5G64360.3,AT5G09540.1 Poptr1|577321,Poptr1|562379,Poptr1|577316  
AT1G62970.1  
AT5G62820.1 Poptr1|666460,Poptr1|570082  
AT5G40300.1  
AT2G36330.1  
AT2G28290.1 Poptr1|696282,Poptr1|107242,Poptr1|658004  
Poptr1|658007  
Poptr1|658006  
AT2G34970.1,AT4G18300.1 Poptr1|689844  
AT3G02270.1  
AT4G20020.1 Poptr1|99182,Poptr1|553395  
Poptr1|584471  
AT1G80360.1 Poptr1|683724  
Poptr1|580763,Poptr1|553683  
Poptr1|553682  
AT4G02580.1 Poptr1|710930,Poptr1|559635  
AT1G73720.1 Poptr1|699230  
Poptr1|550563  
AT1G15440.1 Poptr1|349495,Poptr1|48799  
AT4G19840.1 Poptr1|746947,Poptr1|100228  
AT1G33920.1  
AT4G19850.1  
AT5G45090.1  
Poptr1|575604  
AT3G18524.1 Poptr1|569858  
AT3G29075.1 Poptr1|736382,Poptr1|100831  
Poptr1|705166  
AT3G56110.1,AT5G05380.1 Poptr1|696762,Poptr1|724377  
AT1G04260.1 Poptr1|726429  
AT1G08770.1 Poptr1|551089,Poptr1|651854,Poptr1|595411  
AT3G13720.1,AT1G55190.1,AT3G13710.1 Poptr1|689649  
AT5G56230.1 Poptr1|550673  
AT2G38360.1  
AT5G07110.1  
AT2G40380.1  
AT5G01640.1  
AT4G29658.1  
AT1G17700.1  
AT1G55640.1  
Poptr1|59087  
Poptr1|346891  
Poptr1|106065  
AT1G73960.1 Poptr1|688433  
AT3G03340.1,AT5G17440.1 Poptr1|665603,Poptr1|742740  
AT5G49400.1 Poptr1|564405,Poptr1|698306  
AT5G05210.1 Poptr1|354632,Poptr1|725970,Poptr1|657330  
AT2G27750.1  
AT5G41020.1 Poptr1|554751,Poptr1|575346  
AT3G26670.1 Poptr1|700493  
Poptr1|590564  
AT4G33280.1 Poptr1|591874,Poptr1|551891,Poptr1|551890  
Poptr1|551892  
AT1G01490.1 Poptr1|731190,Poptr1|710061  
AT3G05920.1,AT5G26690.1 Poptr1|679206,Poptr1|696117  
AT5G23760.1 Poptr1|748139,Poptr1|570449  
AT1G63950.1  
Poptr1|703328,Poptr1|556109,Poptr1|63497,Poptr1|693827,Poptr1|554413,Poptr1|741108  
Poptr1|72943,Poptr1|346787  
Poptr1|592919  
Poptr1|703726  
Poptr1|351715,Poptr1|99231  
Poptr1|350202,Poptr1|587078,Poptr1|734168  
Poptr1|595329  
AT3G28880.1 Poptr1|545762

AT1G76120.1,AT1G20370.1 Poptr1|693009,Poptr1|52246  
AT4G12610.1 Poptr1|560139,Poptr1|734542  
AT4G32620.1 Poptr1|578135  
Poptr1|352846  
AT1G69070.1 Poptr1|659038  
Poptr1|659039  
AT5G10010.1 Poptr1|71722,Poptr1|562697  
AT5G64910.1  
AT5G67390.1 Poptr1|558930,Poptr1|349811  
AT2G47900.1 Poptr1|697836,Poptr1|354864  
AT1G25280.1 Poptr1|52033,Poptr1|551319  
AT1G47270.1 Poptr1|346809  
AT2G18280.1 Poptr1|679218,Poptr1|682343  
AT1G53320.1 Poptr1|704974,Poptr1|55925  
AT5G18680.1,AT3G06380.1  
AT1G61940.1  
AT1G76900.1  
AT1G43640.1  
Poptr1|651944  
AT5G09260.1,AT5G63880.1 Poptr1|53151,Poptr1|46705  
Poptr1|678388  
AT1G20570.1,AT1G80260.1 Poptr1|582348  
Poptr1|555587  
AT5G17410.2 Poptr1|724343  
AT5G40290.1,AT5G40270.1 Poptr1|697127  
Poptr1|696308  
AT4G16760.1,AT2G35690.1 Poptr1|702862,Poptr1|646132  
AT2G45530.1 Poptr1|550488,Poptr1|569242  
AT1G05910.1 Poptr1|562244,Poptr1|594506  
Poptr1|75481,Poptr1|594502,Poptr1|594503,Poptr1|594501  
AT4G00490.1 Poptr1|572252  
AT3G23920.1 Poptr1|54993  
AT5G45300.1 Poptr1|350020  
AT4G15210.1 Poptr1|679498  
AT5G18670.1 Poptr1|696249  
AT4G17090.1 Poptr1|589941,Poptr1|743239  
AT2G45880.1  
AT2G32290.1  
AT5G55700.1  
Poptr1|63388,Poptr1|350382  
Poptr1|345478  
AT2G31260.1 Poptr1|559679,Poptr1|346859  
AT4G38400.1,AT3G45970.1,AT3G45960.2 Poptr1|721600,Poptr1|694260  
AT3G02260.1 Poptr1|673088  
Poptr1|673089  
AT1G74690.1,AT1G18840.1 Poptr1|661888,Poptr1|581360  
Poptr1|701813  
AT4G26550.1,AT5G56020.1 Poptr1|573133  
Poptr1|690276  
AT4G36890.1 Poptr1|716281,Poptr1|562934  
AT5G67230.1  
AT5G50175.1 Poptr1|575235  
AT4G03600.1,AT1G03730.1 Poptr1|60725  
AT4G28330.1,AT4G28340.1  
AT1G29260.1 Poptr1|555672  
Poptr1|55894  
AT1G75280.1,AT1G75290.1,AT1G75300.1 Poptr1|715230,Poptr1|643102  
AT4G34540.1 Poptr1|686702  
AT4G39230.1 Poptr1|557236  
AT4G13660.1,AT1G32100.1 Poptr1|590096,Poptr1|590095,Poptr1|646332  
AT1G19540.1  
Poptr1|562283,Poptr1|58990,Poptr1|748142,Poptr1|678176,Poptr1|681467  
Poptr1|564489,Poptr1|658944,Poptr1|700814  
Poptr1|108380  
Poptr1|589048  
Poptr1|60692,Poptr1|563044  
Poptr1|546669  
AT2G19540.1 Poptr1|718767  
Poptr1|650711  
AT4G14700.1,AT4G12620.1 Poptr1|557846  
AT5G26820.1 Poptr1|97637  
AT3G08670.1 Poptr1|561010,Poptr1|577207  
AT3G51540.1  
AT1G49350.1 Poptr1|694148,Poptr1|694147  
AT2G28840.1 Poptr1|683826,Poptr1|558084  
AT2G47790.1 Poptr1|688271,Poptr1|684286  
AT1G67500.1 Poptr1|729606  
Poptr1|570839  
AT1G49160.2,AT3G18750.1 Poptr1|595389  
AT5G55560.1 Poptr1|573071  
AT5G41990.1,AT1G64630.1 Poptr1|554544,Poptr1|48661  
AT3G51630.1 Poptr1|571883,Poptr1|577158,Poptr1|574491

AT3G48260.1 Poptr1|345960,Poptr1|575240  
AT5G58350.1 Poptr1|563718  
AT5G38460.1 Poptr1|60388,Poptr1|555846  
Poptr1|580970  
AT3G04650.1 Poptr1|59932  
Poptr1|571058  
AT4G29380.1 Poptr1|653324  
Poptr1|653323  
AT5G48120.1 Poptr1|693673  
AT3G61730.1,AT5G36000.1 Poptr1|572390  
AT3G62500.1 Poptr1|644578  
Poptr1|552271  
AT3G12080.1 Poptr1|557847  
AT1G75100.1 Poptr1|591823,Poptr1|347727  
AT1G30280.1 Poptr1|660533  
AT4G12770.1 Poptr1|573161  
AT4G36520.1 Poptr1|655335,Poptr1|593914  
AT1G21660.1 Poptr1|347217  
AT4G12780.1 Poptr1|648413  
Poptr1|568434  
Poptr1|651462  
Poptr1|568657  
Poptr1|346795  
Poptr1|655336  
AT2G15400.1,AT2G15430.1 Poptr1|649603  
Poptr1|642022  
AT5G23680.1,AT3G48800.1 Poptr1|356117,Poptr1|666739  
Poptr1|63192,Poptr1|350558  
AT2G21620.2 Poptr1|722007,Poptr1|712986  
Poptr1|556479  
Poptr1|557243  
AT5G48630.1 Poptr1|553209,Poptr1|730608  
AT5G48640.1  
AT4G03430.1 Poptr1|730490  
AT2G47450.1 Poptr1|546292,Poptr1|557028  
Poptr1|597356  
AT1G78060.1 Poptr1|72359,Poptr1|551555  
AT5G49360.1 Poptr1|687214,Poptr1|719981  
AT5G09730.1,AT5G64570.1 Poptr1|553472,Poptr1|548785  
AT3G19620.1 Poptr1|65281  
AT5G10560.1 Poptr1|691069  
AT1G02640.1  
AT5G09700.1 Poptr1|551554,Poptr1|559132  
Poptr1|107790  
Poptr1|107561  
Poptr1|586987,Poptr1|562383  
AT1G51710.1,AT3G21280.1 Poptr1|592725,Poptr1|597670  
AT4G19610.1 Poptr1|712728  
AT5G05720.1 Poptr1|640242  
AT3G51730.1 Poptr1|653197,Poptr1|577148  
AT5G01800.1  
AT5G27720.1 Poptr1|664457,Poptr1|552428  
AT5G66420.2 Poptr1|76339  
Poptr1|593906  
Poptr1|593905  
AT3G62900.1 Poptr1|573451,Poptr1|700462  
AT1G02990.2  
AT4G15730.1 Poptr1|581850  
AT4G29060.1 Poptr1|702143  
AT5G62530.1 Poptr1|704277  
Poptr1|640873  
AT1G24190.1,AT1G70060.1 Poptr1|55070,Poptr1|686186  
AT1G24250.1,AT1G27220.1,AT1G70030.1,AT1G23810.1,AT1G27270.1,AT1G24230.1,AT1G27240.1  
AT3G01320.1,AT5G15020.1  
AT1G10250.1,AT1G59890.1,AT1G10450.1  
AT1G24210.1  
AT1G27260.1  
AT1G24220.1,AT1G27280.1,AT1G27250.1,AT1G24200.1  
AT5G35610.1  
AT4G21210.1 Poptr1|555376  
AT3G01200.1  
AT3G20330.1 Poptr1|550113  
AT5G57950.1 Poptr1|653576  
AT5G15680.1 Poptr1|97030  
AT5G35080.1 Poptr1|583649  
AT2G19385.1 Poptr1|561030

AT2G19380.1  
AT1G60550.1 Poptr1|691647  
AT1G16810.1 Poptr1|51963  
Poptr1|660030  
AT3G44110.1,AT5G22060.1 Poptr1|720096,Poptr1|687446,Poptr1|558228  
AT3G62600.1 Poptr1|572634,Poptr1|692271  
Poptr1|709907  
Poptr1|591713  
Poptr1|64152  
Poptr1|585513  
AT1G23360.1 Poptr1|345542  
AT5G57190.1,AT4G25970.1 Poptr1|640632,Poptr1|645867  
AT2G43560.1 Poptr1|594616,Poptr1|562188  
AT5G12190.1 Poptr1|706504,Poptr1|649901  
AT2G14870.1  
AT3G04500.1 Poptr1|662977,Poptr1|665301  
AT1G43190.1 Poptr1|342353,Poptr1|694636  
AT2G20420.1 Poptr1|730612,Poptr1|645589  
AT5G26680.1 Poptr1|570643  
AT4G32520.1 Poptr1|561693  
AT4G37930.1 Poptr1|563419,Poptr1|725211  
AT1G36370.1,AT1G22020.1 Poptr1|551519,Poptr1|72393  
AT4G13930.1 Poptr1|707158,Poptr1|681317  
AT4G13890.1  
Poptr1|597306  
Poptr1|643921  
Poptr1|548738  
Poptr1|589729  
AT3G18430.1 Poptr1|703253  
Poptr1|578713  
AT4G28370.1,AT2G20650.1 Poptr1|654378,Poptr1|679699  
AT4G15010.1 Poptr1|346481  
Poptr1|574900,Poptr1|573142  
Poptr1|587018  
AT2G29510.1 Poptr1|557999,Poptr1|560848,Poptr1|641130  
AT5G59020.1  
AT2G37930.1,AT5G01030.1  
AT4G12570.1 Poptr1|667132,Poptr1|652404,Poptr1|667498  
Poptr1|667499  
AT1G77122.1 Poptr1|551353  
AT4G13870.2 Poptr1|681314  
AT4G13885.1  
Poptr1|707164  
AT3G08505.1 Poptr1|706432,Poptr1|722758  
Poptr1|714553  
AT1G78815.1 Poptr1|585775,Poptr1|341556,Poptr1|700508,Poptr1|660852  
AT1G07090.1 Poptr1|722583,Poptr1|706622  
AT2G31160.1 Poptr1|559709,Poptr1|354584,Poptr1|342236,Poptr1|588943  
AT5G28490.1,AT3G04510.1 Poptr1|571095,Poptr1|573716  
AT2G42610.1  
AT1G16910.1  
AT5G58500.1  
AT3G23290.1  
Poptr1|550562,Poptr1|727377  
Poptr1|556868  
AT2G46580.1 Poptr1|644606,Poptr1|688190  
AT1G19880.1 Poptr1|694827,Poptr1|692960  
Poptr1|346724  
AT3G61415.1,AT2G45950.1 Poptr1|570432,Poptr1|575844  
Poptr1|347983,Poptr1|57031  
AT1G24300.1,AT1G27430.1 Poptr1|703902,Poptr1|549728,Poptr1|64985,Poptr1|549731  
AT3G20740.1 Poptr1|688045  
Poptr1|593495  
AT4G01270.1 Poptr1|572307  
AT4G01245.1  
Poptr1|348014  
AT1G47750.1 Poptr1|347724,Poptr1|591826  
AT3G47430.1 Poptr1|554178,Poptr1|590183  
Poptr1|581266  
AT2G23600.1,AT2G23590.1,AT2G23620.1,AT2G23610.1 Poptr1|696048,Poptr1|563033  
AT2G23550.1,AT2G23560.1,AT4G37150.1,AT2G23580.1  
AT5G10300.1  
AT2G23570.1  
AT4G37140.1  
Poptr1|71955,Poptr1|580690,Poptr1|107188,Poptr1|51832,Poptr1|563039,Poptr1|568425,Poptr1|747594,  
Poptr1|563037,Poptr1|76180,Poptr1|563035,Poptr1|558830  
Poptr1|719351,Poptr1|696051  
Poptr1|76172  
AT1G73885.1 Poptr1|596471,Poptr1|590360  
AT2G37370.1 Poptr1|576608  
AT5G13560.1 Poptr1|567507,Poptr1|563824  
ATCG01040.1 Poptr1|582122



Poptr1|590306  
Poptr1|580211  
Poptr1|584421  
Poptr1|582432  
AT3G20390.1 Poptr1|691890,Poptr1|569140  
AT5G40740.1 Poptr1|691610  
Poptr1|581731  
AT4G16570.1 Poptr1|553867  
Poptr1|356461  
AT5G38790.1,AT3G30580.1 Poptr1|580726,Poptr1|545706  
AT5G52200.1 Poptr1|701177,Poptr1|570481  
AT3G58050.1,AT2G41960.1 Poptr1|576395,Poptr1|344445  
AT4G26270.1,AT5G56630.1 Poptr1|745172,Poptr1|653318  
AT2G22480.1 Poptr1|719787  
AT5G47810.1 Poptr1|582324  
AT4G29220.1  
AT4G32840.1  
Poptr1|695057  
Poptr1|560067  
Poptr1|596908  
AT2G17510.1 Poptr1|349882  
ATCG00430.1 Poptr1|748952  
AT1G79940.1 Poptr1|689677,Poptr1|556117  
AT4G21180.1  
AT2G42750.1 Poptr1|572857  
AT3G56990.1 Poptr1|576176  
Poptr1|560377  
AT4G25180.1 Poptr1|554164  
AT1G51110.1 Poptr1|62756  
Poptr1|62757  
Poptr1|580531  
AT5G66840.1 Poptr1|558848  
Poptr1|349661  
Poptr1|76138  
AT3G61790.1 Poptr1|688188,Poptr1|569555,Poptr1|348081,Poptr1|574747  
AT1G66650.1,AT5G37870.1,AT5G37930.1 Poptr1|555926,Poptr1|693825,Poptr1|703329  
AT2G41980.1,AT3G58040.1 Poptr1|561239  
AT5G53360.1  
AT4G27880.1  
AT1G66630.1,AT5G62800.1  
Poptr1|711983,Poptr1|62910  
Poptr1|62743,Poptr1|555252  
Poptr1|577611  
AT5G04920.1 Poptr1|687442  
Poptr1|597609  
Poptr1|563503  
AT3G14120.1 Poptr1|745842  
Poptr1|561958,Poptr1|577958,Poptr1|552673  
AT5G52380.1 Poptr1|699296,Poptr1|667037  
Poptr1|356231  
AT4G35520.1 Poptr1|71898  
AT1G05970.2 Poptr1|594514  
AT1G26580.1 Poptr1|566942,Poptr1|353918  
AT1G13880.1,AT2G03470.1  
Poptr1|545984  
Poptr1|108752  
AT3G47400.1 Poptr1|570594,Poptr1|575665  
AT5G19730.1 Poptr1|690312  
AT3G29090.1 Poptr1|545739  
AT2G21610.1 Poptr1|546667  
AT3G49220.1 Poptr1|700796,Poptr1|687702  
AT3G10720.2,AT5G04970.1 Poptr1|344832  
AT2G26440.1 Poptr1|589360  
AT3G24130.1,AT5G18990.1 Poptr1|577418  
AT5G47500.1 Poptr1|553872  
AT4G02330.1,AT1G02810.1 Poptr1|348276,Poptr1|572672  
AT3G17060.1 Poptr1|354021  
AT1G23200.1 Poptr1|566463  
AT5G55590.1 Poptr1|65476  
AT2G45220.1 Poptr1|552027,Poptr1|572081  
AT1G11580.1 Poptr1|698859  
AT3G43270.1 Poptr1|702691  
AT2G47040.1,AT3G62170.1,AT2G47030.1  
Poptr1|553456,Poptr1|589359,Poptr1|343252,Poptr1|548768,Poptr1|548766  
AT1G05310.1 Poptr1|575986  
AT5G64640.1,AT5G09760.1 Poptr1|718566,Poptr1|51664  
AT2G36710.1 Poptr1|589520  
AT5G07430.1,AT5G61680.1,AT5G07420.1,AT1G69940.1,AT5G07410.1  
Poptr1|106439,Poptr1|593729,Poptr1|346059,Poptr1|561317,Poptr1|346058,Poptr1|688571  
AT4G02300.1,AT4G02320.1 Poptr1|348277  
AT1G53840.1 Poptr1|584164,Poptr1|349691  
AT3G10710.1,AT5G04960.1 Poptr1|567840,Poptr1|563492

AT3G05620.1 Poptr1|581910,Poptr1|570758  
AT1G53830.1,AT3G14310.1 Poptr1|676335,Poptr1|553829  
AT5G51490.1,AT5G51500.1  
AT3G42160.1  
AT2G43050.1  
AT5G53370.1  
AT2G19150.1  
AT2G47550.1  
AT3G60730.1  
AT3G59010.1  
AT4G00190.1  
AT1G11370.1,AT1G11590.1  
AT1G44980.1,AT4G03930.1,AT3G27980.1  
AT4G33220.1  
AT2G36700.1  
AT3G14300.1  
Poptr1|572575,Poptr1|655414  
Poptr1|577681  
Poptr1|569547  
Poptr1|581688,Poptr1|544996  
Poptr1|65096  
Poptr1|581909  
Poptr1|570759  
Poptr1|356380,Poptr1|575664,Poptr1|575662  
Poptr1|570597  
Poptr1|590154  
Poptr1|589338  
Poptr1|581564,Poptr1|352321  
Poptr1|570408  
Poptr1|588183  
Poptr1|589358  
Poptr1|676332,Poptr1|561922,Poptr1|98634,Poptr1|739961,Poptr1|583475,Poptr1|594024,Poptr1|583478,  
Poptr1|673259,Poptr1|561923  
Poptr1|748497  
Poptr1|107118,Poptr1|577966,Poptr1|98633,Poptr1|597707  
Poptr1|676914,Poptr1|582220  
Poptr1|105801  
AT3G54800.1 Poptr1|563734,Poptr1|567614  
AT5G10750.1 Poptr1|578331  
AT5G35180.1 Poptr1|578799  
AT5G45560.1,AT4G19040.1 Poptr1|343508,Poptr1|702971  
AT2G28320.1  
AT5G25020.1,AT5G25010.1,AT5G24990.1  
Poptr1|596069  
AT5G12470.1 Poptr1|64517  
Poptr1|722948,Poptr1|691430  
AT3G56140.1,AT2G40400.1 Poptr1|353737  
AT4G31180.1,AT4G26870.1 Poptr1|344243  
AT3G21060.1 Poptr1|60212,Poptr1|549907  
AT5G50810.1 Poptr1|662195,Poptr1|575412  
AT5G39360.1 Poptr1|556349  
AT3G63060.1,AT5G15440.1  
AT1G67930.1 Poptr1|551234,Poptr1|714877  
AT1G69060.1 Poptr1|659034  
Poptr1|656689  
AT3G07090.1 Poptr1|710319  
AT5G63290.1 Poptr1|570203  
Poptr1|590503  
Poptr1|666598  
AT4G02500.1 Poptr1|745896,Poptr1|565718  
AT2G22900.1,AT4G37690.1 Poptr1|655536,Poptr1|663687  
AT5G07720.1,AT1G74380.1 Poptr1|569966  
AT3G62720.1  
AT4G38310.1  
AT1G18690.1  
Poptr1|102517  
Poptr1|565720  
Poptr1|744171  
AT5G28750.1 Poptr1|742023,Poptr1|571038  
AT5G52440.1 Poptr1|701206,Poptr1|699319  
AT5G17570.1 Poptr1|571367  
AT3G03500.1  
AT4G08330.1 Poptr1|643622,Poptr1|694563  
Poptr1|558482  
Poptr1|573167  
AT3G16230.1 Poptr1|553751,Poptr1|64040  
AT3G16220.1  
Poptr1|579555  
AT2G33255.1 Poptr1|54989  
AT5G12900.1 Poptr1|547899  
AT4G21710.1 Poptr1|713972  
AT3G18090.1,AT3G23780.1 Poptr1|737361

AT1G29940.1 Poptr1|547797  
AT5G45140.1  
Poptr1|353018  
Poptr1|578280  
AT3G54250.1,AT2G38700.1 Poptr1|655777,Poptr1|660167  
AT5G52160.1 Poptr1|57799,Poptr1|662373  
AT5G07230.1,AT5G62080.1  
AT4G00980.1 Poptr1|552283  
AT4G10920.1 Poptr1|48679  
AT1G25290.1 Poptr1|693798  
AT4G33670.1 Poptr1|557582,Poptr1|550060  
AT1G04690.1 Poptr1|681762  
Poptr1|568139  
AT1G17280.1,AT5G50430.1 Poptr1|683197,Poptr1|684995  
AT2G06925.1 Poptr1|652826,Poptr1|578958  
Poptr1|553673  
AT5G03450.1 Poptr1|589489  
Poptr1|698687  
AT2G32070.1,AT1G80780.1 Poptr1|554871,Poptr1|48542,Poptr1|694966,Poptr1|702058  
AT3G44260.1,AT5G22250.1 Poptr1|686593,Poptr1|679906  
AT1G61470.1,AT3G44240.1,AT1G27890.1,AT1G06450.1,AT1G27820.1 Poptr1|578101  
AT1G15920.1  
AT5G10960.1  
Poptr1|653549  
Poptr1|350963,Poptr1|109241,Poptr1|587245,Poptr1|586271  
Poptr1|62807,Poptr1|352454,Poptr1|594053  
Poptr1|545257,Poptr1|584306  
AT3G01780.1 Poptr1|549660  
Poptr1|641762  
Poptr1|641761  
AT1G08520.1 Poptr1|650100  
Poptr1|64233  
AT1G23280.1 Poptr1|666527,Poptr1|662035  
AT3G24506.1,AT2G17240.1 Poptr1|702122  
AT5G62440.1 Poptr1|662756,Poptr1|595600  
AT4G15030.1 Poptr1|706416  
AT2G18900.1 Poptr1|580503,Poptr1|578583  
AT3G26480.1  
Poptr1|591313  
AT3G55360.1 Poptr1|563899,Poptr1|567433  
AT4G35630.1,AT2G17630.1 Poptr1|558766  
AT4G17830.1 Poptr1|743139,Poptr1|702918  
AT2G03810.1 Poptr1|696604,Poptr1|566755  
AT1G13650.2  
Poptr1|574875  
AT1G70780.1,AT1G23150.1 Poptr1|698183,Poptr1|686299  
Poptr1|693886,Poptr1|348828  
AT2G27830.1 Poptr1|741654,Poptr1|649081  
Poptr1|554252  
AT1G21690.1 Poptr1|651448  
Poptr1|595126  
AT5G27740.1 Poptr1|689255  
Poptr1|349899  
AT1G60490.1 Poptr1|345919  
AT1G03600.1 Poptr1|714905,Poptr1|643350  
AT5G19855.1 Poptr1|549248,Poptr1|557854  
AT1G05420.1,AT2G32100.1 Poptr1|354485,Poptr1|566240,Poptr1|346965  
AT4G14860.1  
AT4G03415.1 Poptr1|580372,Poptr1|730501  
AT5G01700.2 Poptr1|577088,Poptr1|560958  
AT1G16220.1,AT1G79630.1 Poptr1|694001,Poptr1|66016  
AT5G26010.1 Poptr1|736797,Poptr1|561696  
AT3G02750.3 Poptr1|574070,Poptr1|596965  
AT3G05640.1,AT5G27930.1 Poptr1|704418,Poptr1|729480  
AT1G03590.1  
AT4G32950.1  
AT5G36250.1  
Poptr1|675264  
Poptr1|565513,Poptr1|565514  
AT5G13700.1 Poptr1|64524  
Poptr1|666455,Poptr1|570078  
AT2G37160.1,AT3G53390.1 Poptr1|576679,Poptr1|739435  
Poptr1|593695  
AT4G15840.1 Poptr1|697828  
Poptr1|593626,Poptr1|587319  
AT3G04240.1 Poptr1|702395  
Poptr1|729924  
AT3G07270.1 Poptr1|553210,Poptr1|573397  
AT3G10630.1 Poptr1|563555  
AT5G51840.1 Poptr1|57782  
Poptr1|570536  
Poptr1|570535

Poptr1|570534  
AT4G02460.1 Poptr1|572706  
AT2G44920.2 Poptr1|563930,Poptr1|567387  
AT2G27120.1,AT1G08260.1 Poptr1|594813  
AT1G79220.1 Poptr1|562849  
AT1G16000.1,AT1G80890.1 Poptr1|554894,Poptr1|587198  
Poptr1|555733  
AT2G35810.1,AT2G35830.1,AT2G35820.1 Poptr1|659819  
AT1G11780.1 Poptr1|554781  
Poptr1|548028  
Poptr1|579665  
AT1G68720.1 Poptr1|354082  
Poptr1|566701  
AT3G10380.1 Poptr1|686543,Poptr1|698685  
AT3G16640.1 Poptr1|587327,Poptr1|581885  
AT3G05540.1  
Poptr1|725700  
AT4G24160.1 Poptr1|550934,Poptr1|694821  
AT5G40950.1 Poptr1|707031  
AT1G49290.1,AT5G13620.1 Poptr1|567544,Poptr1|353443  
Poptr1|589884  
AT4G14340.1 Poptr1|684614,Poptr1|72911,Poptr1|687002,Poptr1|345452  
AT4G28880.1,AT4G28860.1 Poptr1|689108  
AT1G72710.1 Poptr1|582934,Poptr1|561049,Poptr1|553530  
AT3G23340.1  
AT5G44100.1,AT1G03930.1  
AT5G43320.1,AT1G04440.1  
AT4G28540.1  
AT4G26100.1,AT5G57015.1  
AT2G19470.1  
AT4G08800.1  
Poptr1|571101  
Poptr1|695040,Poptr1|701957  
AT3G13970.1,AT1G54210.1 Poptr1|343305  
Poptr1|582404  
AT1G03190.1 Poptr1|346993  
Poptr1|582271  
AT2G28680.1,AT1G07750.1 Poptr1|696014,Poptr1|720971  
Poptr1|579491  
Poptr1|568926  
AT5G52430.1,AT4G25620.1 Poptr1|728536  
Poptr1|343640,Poptr1|63524,Poptr1|102279  
AT5G58640.1,AT3G47300.1 Poptr1|735861  
Poptr1|691352,Poptr1|697579  
AT1G34000.1 Poptr1|682163,Poptr1|693060  
AT3G23440.1 Poptr1|565790,Poptr1|553333  
AT1G04000.1,AT5G44060.1  
AT3G52220.1 Poptr1|725409,Poptr1|655760  
Poptr1|579388  
AT5G54140.1 Poptr1|729069,Poptr1|574650  
AT3G02875.1 Poptr1|344530  
AT1G51780.1,AT1G51760.1 Poptr1|693769  
AT1G44350.1 Poptr1|716674,Poptr1|551444  
AT5G56660.1,AT5G56650.1  
Poptr1|735294  
Poptr1|580252  
Poptr1|345629  
ATCG00170.1 Poptr1|597025  
Poptr1|585677,Poptr1|349433  
Poptr1|590230  
Poptr1|585054  
AT5G54260.1 Poptr1|582090  
Poptr1|582089  
AT3G17470.1 Poptr1|725550  
AT1G78620.2 Poptr1|728254  
Poptr1|674936  
AT4G19100.1 Poptr1|702975  
AT5G45040.1 Poptr1|678273,Poptr1|666852  
AT2G44050.1 Poptr1|654317,Poptr1|585046  
AT1G50000.1 Poptr1|707454  
Poptr1|642117  
Poptr1|649703  
Poptr1|676786  
AT3G55960.1 Poptr1|659512,Poptr1|656249  
Poptr1|560916,Poptr1|576975  
AT1G55900.1 Poptr1|642296,Poptr1|568582  
AT4G22830.1 Poptr1|640598  
AT3G13230.1 Poptr1|60702,Poptr1|681885  
AT2G27730.1 Poptr1|697077,Poptr1|594966  
AT1G51540.1 Poptr1|720506,Poptr1|567787  
AT3G27220.1  
Poptr1|99628

AT5G11230.1,AT5G25400.1 Poptr1|58553,Poptr1|654132  
AT3G14410.1 Poptr1|98380  
AT3G17430.1,AT1G48230.1 Poptr1|742287,Poptr1|725533  
AT4G32390.1,AT2G25520.1  
AT1G53660.1  
AT5G26040.2 Poptr1|352692  
AT4G12070.1 Poptr1|62988,Poptr1|693195  
Poptr1|554939  
AT1G32360.1 Poptr1|356641,Poptr1|554027  
AT2G35430.1  
AT2G04550.1 Poptr1|732365  
AT3G58990.1,AT2G43090.1 Poptr1|712500  
AT2G43100.1  
AT1G74910.1 Poptr1|700899,Poptr1|570040  
AT2G04650.1  
AT4G14210.1 Poptr1|57279,Poptr1|553085  
AT3G19830.1,AT1G50260.1 Poptr1|353826,Poptr1|567060  
Poptr1|588111  
AT5G06990.1 Poptr1|555082,Poptr1|547789  
AT2G37880.1 Poptr1|351829  
AT1G21050.1,AT1G76610.1 Poptr1|560028,Poptr1|550705  
AT5G23100.1 Poptr1|569841,Poptr1|55290  
AT5G42680.1 Poptr1|644155,Poptr1|677796  
AT2G41660.1 Poptr1|576367,Poptr1|560483  
AT2G21990.1 Poptr1|51748  
AT2G22460.1,AT5G65340.1  
AT3G25640.1  
AT4G39610.1  
Poptr1|592521  
AT1G67960.1 Poptr1|566414  
Poptr1|564692  
Poptr1|564691  
AT4G10650.1 Poptr1|570113  
AT2G41670.1 Poptr1|344138  
AT5G18230.1 Poptr1|738421  
Poptr1|699898  
AT1G15660.1 Poptr1|553696  
Poptr1|553697,Poptr1|640687  
AT4G37460.1 Poptr1|343439  
AT1G50970.1 Poptr1|734621  
AT1G50500.1  
AT2G32970.1 Poptr1|732312,Poptr1|552741  
AT5G16280.1 Poptr1|576490  
Poptr1|576489  
Poptr1|576488  
AT4G30880.1 Poptr1|639865,Poptr1|547856  
AT4G33550.1  
AT3G47810.1 Poptr1|568470,Poptr1|674792  
Poptr1|107213  
AT5G63010.1 Poptr1|355944,Poptr1|671916  
AT1G19610.1,AT5G44430.1,AT5G44420.1,AT1G75830.1,AT2G26020.1,AT2G26010.1 Poptr1|550991  
AT2G42040.1 Poptr1|701389,Poptr1|352241,Poptr1|352240  
Poptr1|576386  
AT2G20920.1 Poptr1|557054,Poptr1|648817  
AT4G09510.1,AT1G35580.1 Poptr1|59529,Poptr1|574265  
AT5G22510.1 Poptr1|563618,Poptr1|698809  
AT4G34860.1 Poptr1|54405,Poptr1|546709  
AT1G56560.1 Poptr1|570694  
AT1G22650.1  
AT1G72000.1  
AT3G06500.1  
AT3G05820.1  
Poptr1|572412,Poptr1|348102  
Poptr1|591295,Poptr1|573291  
Poptr1|572413  
Poptr1|685437  
Poptr1|652065  
Poptr1|720811  
Poptr1|581668  
AT5G62650.1 Poptr1|714350,Poptr1|741117  
Poptr1|579206  
Poptr1|556982,Poptr1|586270  
AT2G26530.1 Poptr1|551877,Poptr1|557352,Poptr1|591893  
AT2G15760.1  
Poptr1|64615  
AT5G04610.1 Poptr1|567982  
Poptr1|556165,Poptr1|576909,Poptr1|106636  
Poptr1|597211  
AT3G46210.1 Poptr1|352776  
Poptr1|578064  
AT4G01220.1 Poptr1|731230  
AT4G01750.1,AT1G56550.1,AT4G01770.1

Poptr1|711264  
AT1G27980.1 Poptr1|350600  
Poptr1|48584  
Poptr1|640061  
AT3G28350.1,AT3G28370.1 Poptr1|64750,Poptr1|668480  
Poptr1|64749  
AT4G27340.1 Poptr1|568983  
Poptr1|593653  
Poptr1|568984  
Poptr1|593652,Poptr1|568985  
AT1G72510.1,AT2G09970.1 Poptr1|673203,Poptr1|712244  
AT1G79770.1 Poptr1|58502,Poptr1|548908,Poptr1|349606  
AT5G20670.1 Poptr1|589301  
AT3G22540.1 Poptr1|566229,Poptr1|564857,Poptr1|658510  
AT2G25780.1 Poptr1|352759  
AT1G54095.1  
AT5G25840.1  
AT4G14819.1  
Poptr1|717097  
Poptr1|569375  
AT4G00355.1 Poptr1|552182,Poptr1|700227  
AT2G45980.1  
AT3G15460.1,AT1G52930.1 Poptr1|579496,Poptr1|568932  
AT3G15520.1 Poptr1|579509  
Poptr1|568950  
AT3G44620.1 Poptr1|721498,Poptr1|594818  
AT3G24860.1 Poptr1|553172  
AT2G44730.1 Poptr1|591748  
AT4G27170.1,AT5G54740.1,AT4G27160.1,AT4G27150.1,AT4G27140.1 Poptr1|699137  
Poptr1|699136  
AT1G34245.1 Poptr1|592200  
AT2G20875.1 Poptr1|580375,Poptr1|571759  
Poptr1|568941  
AT5G11560.1 Poptr1|344674  
Poptr1|578090  
AT5G18690.1 Poptr1|103119,Poptr1|572749,Poptr1|354868,Poptr1|573515  
AT2G47930.1  
AT3G06360.1  
AT5G51460.1 Poptr1|575657,Poptr1|346140  
AT5G10100.1,AT5G65140.1 Poptr1|654797,Poptr1|650738  
AT4G22590.1,AT4G12430.1 Poptr1|704257,Poptr1|554210  
AT2G22190.1,AT4G39770.1  
AT1G78090.1  
AT1G35910.1  
Poptr1|647218  
Poptr1|51933,Poptr1|347364  
AT4G37080.2 Poptr1|71984,Poptr1|76134  
AT5G42690.1  
Poptr1|644149  
AT2G31270.1 Poptr1|694754,Poptr1|692891  
AT3G54710.1  
Poptr1|545080  
AT2G21160.1 Poptr1|697211,Poptr1|556593  
AT2G16595.1  
AT4G38060.2,AT5G65480.1 Poptr1|551664  
AT5G23575.1,AT5G08500.1 Poptr1|714557,Poptr1|58833  
Poptr1|662107  
AT4G13430.1 Poptr1|697900  
Poptr1|345471  
Poptr1|590975  
AT4G03280.1 Poptr1|574577,Poptr1|700065  
AT2G06210.1 Poptr1|739128  
AT5G11600.1 Poptr1|352773,Poptr1|668898  
AT1G13920.1 Poptr1|696687,Poptr1|566956  
AT5G61280.1 Poptr1|574862  
AT1G69325.1  
AT5G07570.1  
Poptr1|679291,Poptr1|556212,Poptr1|552669,Poptr1|579865,Poptr1|573791,Poptr1|579374,Poptr1|58229  
1,Poptr1|592749,Poptr1|581421,Poptr1|582444,Poptr1|569911,Poptr1|585440,Poptr1|583964,Poptr1|108748,Poptr1|1  
02061,Poptr1|581439,Poptr1|569892,Poptr1|568516,Poptr1|592093,Poptr1|594368,Poptr1|589157,Poptr1|597471,Pop  
ptr1|579923,Poptr1|593606,Poptr1|573316,Poptr1|565322,Poptr1|590789,Poptr1|585345,Poptr1|107633,Poptr1|5849  
10,Poptr1|102232,Poptr1|105374,Poptr1|108668,Poptr1|584665,Poptr1|585559,Poptr1|592585,Poptr1|579914,Poptr1|  
107632  
Poptr1|586385,Poptr1|587459  
AT5G27210.1,AT3G05010.1 Poptr1|729729,Poptr1|595509  
AT5G56290.1 Poptr1|704495,Poptr1|708236  
AT1G50900.1 Poptr1|663367  
AT2G15240.1 Poptr1|65234  
Poptr1|686743  
AT1G16720.1 Poptr1|582198,Poptr1|563365  
AT5G13760.1 Poptr1|686828,Poptr1|691445  
AT3G15380.1 Poptr1|728405

AT2G14680.1 Poptr1|557526  
Poptr1|642105  
Poptr1|550017,Poptr1|557525  
Poptr1|642106  
AT4G01950.1,AT1G02390.1 Poptr1|552558  
AT4G00400.1,AT1G01610.1 Poptr1|700225  
AT1G06520.1 Poptr1|72686  
AT2G38110.1 Poptr1|735760,Poptr1|560888  
Poptr1|344429  
AT4G39450.1 Poptr1|51756  
Poptr1|654906  
Poptr1|654905  
AT1G48130.1 Poptr1|682401  
Poptr1|566901  
AT4G14040.1,AT4G14030.1 Poptr1|707134,Poptr1|597079  
AT3G23800.1  
AT3G47490.1 Poptr1|558333  
AT1G18680.1 Poptr1|728844  
AT2G18465.1 Poptr1|99902,Poptr1|691722  
AT3G58020.1  
AT4G33945.1 Poptr1|690176  
Poptr1|594377,Poptr1|568672  
AT1G22510.1,AT1G72175.1 Poptr1|738775,Poptr1|678161  
AT4G33940.1 Poptr1|581484  
AT4G30410.1 Poptr1|702204,Poptr1|561394  
AT5G57780.1  
AT5G24090.1 Poptr1|705038,Poptr1|355189  
Poptr1|746637,Poptr1|664045,Poptr1|343147,Poptr1|57061,Poptr1|586583,Poptr1|586585,Poptr1|660378,  
Poptr1|552227  
Poptr1|572335  
AT1G76750.1 Poptr1|557620,Poptr1|100343,Poptr1|585118  
AT3G23325.1,AT4G14342.1 Poptr1|565775,Poptr1|696362  
AT1G17350.1,AT1G72420.1 Poptr1|726408  
Poptr1|584145  
AT3G46560.1 Poptr1|569404  
AT2G01080.1 Poptr1|553462,Poptr1|709739  
Poptr1|99014  
AT1G71860.1 Poptr1|592214  
Poptr1|574306  
AT2G29900.1 Poptr1|60025  
AT1G25682.1 Poptr1|658951,Poptr1|564483  
AT1G25988.1  
AT3G63000.1,AT2G47970.1 Poptr1|644960  
Poptr1|731936  
AT1G28190.1 Poptr1|554661,Poptr1|640148  
AT5G12340.1 Poptr1|64638  
AT1G32500.1 Poptr1|702913,Poptr1|743165  
AT5G38660.1 Poptr1|714370,Poptr1|580777  
Poptr1|680967  
AT4G16170.1 Poptr1|698323  
Poptr1|656631  
AT1G80680.1 Poptr1|350706  
Poptr1|63046  
AT3G19490.1 Poptr1|54522,Poptr1|549940  
AT1G49810.1  
AT4G20190.1,AT5G44660.1 Poptr1|548167,Poptr1|350483  
AT1G30850.1,AT2G34910.1  
AT3G59400.1 Poptr1|594513,Poptr1|562240  
AT4G15510.1 Poptr1|47540,Poptr1|48201  
AT4G28706.2 Poptr1|553276  
AT5G43910.2  
AT3G13220.1 Poptr1|49407  
AT1G66950.1,AT2G36380.1 Poptr1|589576  
AT4G27420.1 Poptr1|568943,Poptr1|579505  
AT1G31770.1 Poptr1|596872,Poptr1|349409  
AT5G60740.1 Poptr1|698676  
AT2G26910.1 Poptr1|702112  
AT2G13610.1 Poptr1|654661,Poptr1|650613  
AT5G13580.1 Poptr1|353473  
AT1G15520.1 Poptr1|352867,Poptr1|554891,Poptr1|58533,Poptr1|548636,Poptr1|547951  
AT3G53510.1,AT2G37360.1 Poptr1|653758,Poptr1|572217,Poptr1|552145  
AT2G01320.3 Poptr1|566522  
AT5G06530.1 Poptr1|688740,Poptr1|685664  
AT3G53480.1,AT2G37280.1 Poptr1|101934,Poptr1|564329,Poptr1|55360  
AT2G29940.1 Poptr1|64269  
AT4G25750.1,AT5G52860.1 Poptr1|96949  
AT1G71960.1 Poptr1|59011  
AT1G15210.1,AT1G59870.1 Poptr1|705805,Poptr1|693676  
AT1G53390.1  
AT3G55090.1,AT2G39350.1  
AT3G30842.1  
AT3G52310.1

AT4G15236.1,AT4G15215.1,AT4G15230.1  
AT3G16340.1  
Poptr1|568594  
Poptr1|568593  
Poptr1|660190,Poptr1|353281  
Poptr1|350695  
Poptr1|353963  
Poptr1|566694  
Poptr1|353358  
Poptr1|554752  
Poptr1|349530,Poptr1|708617,Poptr1|547952,Poptr1|554847,Poptr1|350696,Poptr1|350692,Poptr1|70862  
1,Poptr1|595251,Poptr1|63052  
Poptr1|108676  
Poptr1|554848  
Poptr1|106340,Poptr1|353959,Poptr1|348414  
Poptr1|348412  
Poptr1|732773,Poptr1|342949  
Poptr1|103651  
Poptr1|584452  
Poptr1|557928  
Poptr1|592247  
Poptr1|592248  
AT1G67440.1 Poptr1|560282  
AT1G67460.1  
AT3G52155.1 Poptr1|560050,Poptr1|582340  
AT5G11270.1 Poptr1|561871  
Poptr1|596244,Poptr1|578185  
AT1G03140.1 Poptr1|559562  
AT1G54590.1  
AT2G42210.2 Poptr1|672941  
AT2G24240.1,AT4G30940.1 Poptr1|561326,Poptr1|669595  
AT1G71080.1 Poptr1|566521,Poptr1|564592  
AT5G38050.1  
Poptr1|555923  
AT5G23450.1 Poptr1|725184,Poptr1|686575  
AT1G13460.1,AT3G26020.1 Poptr1|354702,Poptr1|565930  
AT4G15415.1,AT3G21650.1 Poptr1|684218,Poptr1|664774  
AT5G03470.1,AT3G09880.1 Poptr1|688796  
AT5G25510.1 Poptr1|561822,Poptr1|668978  
AT3G54930.1  
Poptr1|55021,Poptr1|354703  
Poptr1|589495  
Poptr1|557049,Poptr1|556670  
Poptr1|578409  
AT1G30910.1 Poptr1|646882  
AT5G44720.1  
AT2G39990.1 Poptr1|659552  
Poptr1|696800  
AT5G56210.1,AT4G26450.1 Poptr1|550670,Poptr1|582529  
AT3G13360.1  
Poptr1|98091  
AT5G23130.1,AT5G08200.1 Poptr1|562820,Poptr1|71808  
Poptr1|728697  
AT5G55130.1 Poptr1|550099  
AT4G24940.1,AT5G50680.1,AT5G50580.2 Poptr1|728680,Poptr1|575384  
AT3G21530.1 Poptr1|354892  
AT2G48030.1  
Poptr1|565690  
AT4G32260.1 Poptr1|578220,Poptr1|561911  
AT5G57300.1 Poptr1|737699  
AT3G57040.1,AT2G41310.1 Poptr1|57928,Poptr1|351425  
AT1G74890.1,AT1G19050.1 Poptr1|666400  
AT1G59940.1,AT1G10470.1 Poptr1|696301,Poptr1|696232  
AT2G40670.1,AT3G56380.1 Poptr1|574122  
AT2G07440.1  
AT5G62920.1,AT3G48100.1  
Poptr1|693167,Poptr1|708486  
Poptr1|595135  
Poptr1|692733  
Poptr1|56907,Poptr1|574441  
AT3G30841.1,AT4G09520.1 Poptr1|580748,Poptr1|556175  
Poptr1|693818  
AT2G01110.1 Poptr1|566543  
AT5G16790.1,AT3G02950.1 Poptr1|571435  
AT3G03380.1 Poptr1|684188  
Poptr1|714140,Poptr1|555951  
AT5G50320.1 Poptr1|345988,Poptr1|57647  
AT4G39920.1 Poptr1|650713  
Poptr1|562589  
Poptr1|562590  
AT2G44060.1 Poptr1|695710  
Poptr1|673769



AT2G46140.1 Poptr1|709954,Poptr1|731200  
AT1G01470.1  
AT1G24430.1 Poptr1|580838,Poptr1|565934  
AT3G26040.1 Poptr1|565907,Poptr1|657422,Poptr1|658194  
AT5G23970.1,AT5G47980.1,AT4G15390.1,AT4G15400.1,AT1G24420.1,AT3G30280.1,AT5G47950.1  
Poptr1|562137  
Poptr1|575949  
Poptr1|342120,Poptr1|559939  
Poptr1|560361,Poptr1|344078,Poptr1|544829,Poptr1|560362,Poptr1|575654,Poptr1|575658,Poptr1|67164  
8,Poptr1|579978,Poptr1|670332,Poptr1|641962  
Poptr1|595107,Poptr1|544832,Poptr1|652392,Poptr1|577265,Poptr1|577363  
Poptr1|570600  
Poptr1|562136,Poptr1|562105  
Poptr1|562144  
Poptr1|575948  
AT1G05055.1 Poptr1|690456  
Poptr1|581727  
Poptr1|596592  
AT2G03390.1 Poptr1|724077  
Poptr1|656491  
ATMG01080.1,AT2G07671.1 Poptr1|594183,Poptr1|681382  
Poptr1|107958  
AT1G51740.1 Poptr1|353623,Poptr1|567325  
AT1G75020.1 Poptr1|59425,Poptr1|644190  
AT3G18850.1 Poptr1|557292  
AT2G46100.1 Poptr1|711169  
AT5G20140.1 Poptr1|705129  
Poptr1|561129  
AT4G19680.2,AT4G19690.2 Poptr1|57732  
AT1G60960.1,AT1G10970.1 Poptr1|736888  
AT2G04032.1 Poptr1|566719  
AT1G05300.1,AT2G32270.1 Poptr1|560115,Poptr1|564168,Poptr1|343996  
AT1G31260.1  
AT5G45105.1  
AT4G33020.1  
AT5G62160.1  
Poptr1|107742  
Poptr1|354102  
Poptr1|560118  
AT2G39260.1 Poptr1|353446  
AT1G54500.1 Poptr1|570976,Poptr1|680311  
AT3G57610.1 Poptr1|688783  
AT2G37975.1 Poptr1|576905  
Poptr1|563968,Poptr1|567326  
AT1G64750.1,AT5G45010.1 Poptr1|673864,Poptr1|549657  
AT1G71720.1 Poptr1|651627,Poptr1|551281  
AT2G44600.1,AT3G60200.1 Poptr1|347737,Poptr1|591811  
AT3G05480.1 Poptr1|699735  
Poptr1|97748  
AT4G33120.1,AT4G33110.1 Poptr1|688979  
Poptr1|352638  
AT5G62810.1 Poptr1|355884  
AT4G20960.1 Poptr1|552164  
Poptr1|663963  
AT3G02420.1 Poptr1|690083  
Poptr1|556163  
Poptr1|556162  
AT3G56840.1 Poptr1|695627  
Poptr1|579810  
AT3G10370.1 Poptr1|687399  
Poptr1|579603  
AT4G33090.1 Poptr1|695112  
Poptr1|703440  
AT1G63970.1 Poptr1|709270,Poptr1|646669  
AT1G80210.1,AT3G06820.1 Poptr1|709569  
AT3G23620.1 Poptr1|575280  
AT1G28120.1 Poptr1|646966  
Poptr1|640108  
AT4G37560.1,AT4G37550.1 Poptr1|694452  
Poptr1|651135  
Poptr1|553958  
AT2G32450.1,AT1G05150.1 Poptr1|550939,Poptr1|694819  
AT4G32030.1 Poptr1|654203  
AT1G15800.1,AT1G80610.1 Poptr1|668375,Poptr1|549836  
AT5G25210.1  
Poptr1|673450  
AT3G17120.1 Poptr1|564365,Poptr1|566860  
AT1G66520.1 Poptr1|553027  
AT1G73980.1 Poptr1|689885  
AT1G26190.1  
AT5G20180.1 Poptr1|736574,Poptr1|560603  
ATCG00760.1

AT2G45790.1 Poptr1|748018,Poptr1|572218  
Poptr1|585125  
AT1G63660.1 Poptr1|343636  
Poptr1|596322  
AT4G33150.1 Poptr1|739276  
Poptr1|590470  
Poptr1|589362,Poptr1|589365  
Poptr1|739280  
Poptr1|584342  
AT1G34150.1 Poptr1|693074  
Poptr1|559446  
Poptr1|651647  
AT5G11980.1 Poptr1|561631  
Poptr1|587141  
AT1G07320.1 Poptr1|344591  
AT1G12840.1 Poptr1|60131,Poptr1|65026  
AT5G67540.2,AT3G49880.1 Poptr1|558962  
Poptr1|592536  
AT2G25355.1,AT4G32175.1 Poptr1|699425  
Poptr1|575149  
AT3G62010.1 Poptr1|572500,Poptr1|552400  
AT5G58240.1 Poptr1|47956  
Poptr1|729295  
AT1G12420.1 Poptr1|350122,Poptr1|743948  
AT1G76990.1 Poptr1|692760,Poptr1|72533  
AT3G01990.1 Poptr1|579544,Poptr1|64981  
AT1G69040.2 Poptr1|723867,Poptr1|354063  
AT5G25320.1 Poptr1|737249  
AT5G65890.1 Poptr1|56929,Poptr1|76482  
AT4G22780.1  
AT2G03730.1  
Poptr1|570303  
Poptr1|554742,Poptr1|683595  
Poptr1|355907  
Poptr1|643553  
Poptr1|561921  
AT1G06110.1 Poptr1|682307,Poptr1|594546  
Poptr1|106136  
AT2G40980.1 Poptr1|564170,Poptr1|582157,Poptr1|724232,Poptr1|582159  
AT1G37150.2,AT2G25710.1 Poptr1|342443,Poptr1|694544  
Poptr1|585302  
AT3G60360.1 Poptr1|47765  
Poptr1|670157  
Poptr1|351313  
AT5G19060.1,AT3G06150.1 Poptr1|54927,Poptr1|565326,Poptr1|354936  
AT1G01220.1 Poptr1|664148  
Poptr1|572424  
Poptr1|664149  
Poptr1|348114  
AT4G31120.1 Poptr1|577779  
Poptr1|593340  
AT1G01710.1 Poptr1|700220  
AT4G00520.1  
AT4G00510.1  
AT5G08080.1 Poptr1|702442  
AT1G08560.1 Poptr1|573879,Poptr1|571159  
AT2G18260.1 Poptr1|356963,Poptr1|563176  
AT1G11250.1,AT1G61290.1 Poptr1|546380  
AT3G03800.1  
AT4G03330.1  
Poptr1|571186  
Poptr1|583788  
Poptr1|562290  
Poptr1|557238  
Poptr1|589047  
AT5G59830.1 Poptr1|558106,Poptr1|683838  
AT5G13660.1 Poptr1|698600,Poptr1|351744,Poptr1|563859  
AT2G26930.1 Poptr1|650358,Poptr1|640725  
Poptr1|590813  
AT5G11900.1 Poptr1|561654,Poptr1|577951  
AT5G62270.1 Poptr1|562194  
Poptr1|594612  
Poptr1|594611  
AT1G51720.1 Poptr1|60165  
Poptr1|64121  
Poptr1|675212  
AT4G12240.1 Poptr1|350099  
AT2G41020.1 Poptr1|652519  
Poptr1|652518  
Poptr1|576095  
AT5G66120.2 Poptr1|346349  
AT1G01300.1 Poptr1|684312,Poptr1|700293

AT5G37540.1,AT1G66180.1 Poptr1|348764,Poptr1|555992  
AT1G79720.1 Poptr1|547702,Poptr1|684759  
AT1G64830.1,AT5G33340.1 Poptr1|580115,Poptr1|572545  
AT5G10760.1,AT5G10770.1 Poptr1|737438  
AT5G22850.1 Poptr1|721219,Poptr1|63834  
AT3G59080.1,AT2G42980.1 Poptr1|52072  
AT2G23945.1 Poptr1|561371  
AT3G20015.1 Poptr1|53135,Poptr1|650599  
AT3G18490.1 Poptr1|580224  
AT5G07030.1 Poptr1|350882,Poptr1|708469  
AT2G39710.1 Poptr1|659657,Poptr1|563921  
AT5G02190.1 Poptr1|652998  
AT1G09750.1 Poptr1|551646  
AT1G05840.1 Poptr1|572889  
AT1G25510.1 Poptr1|658926  
AT4G16563.1 Poptr1|346173,Poptr1|103600,Poptr1|553865  
AT3G52500.1 Poptr1|561428,Poptr1|576523  
AT5G43100.1 Poptr1|740528  
AT5G45120.1 Poptr1|100207  
AT2G36670.1 Poptr1|576772  
AT2G03200.1 Poptr1|60217,Poptr1|549896  
AT3G25700.1 Poptr1|564485  
AT2G35615.1,AT1G31450.1 Poptr1|554144  
AT3G61820.1  
AT2G28030.1,AT2G28010.1,AT2G28040.1,AT2G28220.1  
AT3G42550.1  
AT4G04985.1,AT4G30040.1  
AT4G30030.1  
AT4G12920.1  
AT3G54400.1  
AT1G65240.1,AT5G36260.1,AT3G02740.1  
AT1G08210.1  
AT5G24820.1  
AT3G12700.1  
Poptr1|587818  
Poptr1|348417  
Poptr1|578658  
Poptr1|737445,Poptr1|578327,Poptr1|702082,Poptr1|561695,Poptr1|702084,Poptr1|344640  
Poptr1|581446  
Poptr1|744819  
Poptr1|578326  
Poptr1|583928  
Poptr1|673341  
Poptr1|578740  
Poptr1|560781  
Poptr1|574078  
Poptr1|552837  
Poptr1|564505  
Poptr1|594961  
Poptr1|694447  
Poptr1|592475,Poptr1|577335  
Poptr1|578844  
AT1G27680.1 Poptr1|685406,Poptr1|346791  
AT1G05610.1 Poptr1|585045,Poptr1|562078  
AT5G19220.1 Poptr1|720391  
AT2G21590.1,AT4G39210.1 Poptr1|721986,Poptr1|546089  
AT5G48300.1 Poptr1|573143  
Poptr1|57133  
AT1G50670.1 Poptr1|550382,Poptr1|569139  
AT1G55750.1,AT3G61420.1 Poptr1|75597  
Poptr1|558396  
AT1G80950.1 Poptr1|551926,Poptr1|703073  
AT4G28020.1 Poptr1|669484  
AT1G12400.1 Poptr1|581185,Poptr1|54364  
AT4G19180.1 Poptr1|596878  
Poptr1|575198  
AT1G22940.1 Poptr1|343239  
Poptr1|588845  
AT5G23880.1 Poptr1|704680  
Poptr1|671942  
AT1G67320.1 Poptr1|712440  
Poptr1|577410  
AT5G50340.1 Poptr1|691302  
Poptr1|590331  
AT1G67490.1,AT1G24320.1 Poptr1|697923  
Poptr1|565044  
Poptr1|106263  
AT1G65230.1 Poptr1|596964  
AT1G21190.1,AT1G76860.1 Poptr1|559371,Poptr1|551324  
AT3G07050.1 Poptr1|645400  
Poptr1|711279  
AT4G01690.1 Poptr1|348445,Poptr1|57141

AT2G22780.1 Poptr1|686130  
AT5G09660.1 Poptr1|649749,Poptr1|65339  
AT3G47520.1 Poptr1|690460,Poptr1|98858,Poptr1|583880  
AT1G53240.1,AT3G15020.1 Poptr1|728086,Poptr1|707785  
AT3G53910.1  
Poptr1|568741  
Poptr1|585870,Poptr1|555706  
Poptr1|596303  
AT1G04900.1 Poptr1|691701  
AT1G64355.1 Poptr1|640373  
AT1G68430.1 Poptr1|656844,Poptr1|589684,Poptr1|555877,Poptr1|658854  
AT5G16200.1,AT1G66890.1  
AT5G19150.1 Poptr1|719850  
AT3G56020.1 Poptr1|649832  
AT1G56045.1  
AT3G08520.1  
AT3G11120.1  
AT2G40205.1  
Poptr1|564058  
AT1G16970.1 Poptr1|699057  
Poptr1|106011,Poptr1|589384  
AT1G32928.1,AT1G32920.1 Poptr1|661578,Poptr1|677470,Poptr1|642518,Poptr1|550457,Poptr1|569269  
Poptr1|666056  
AT5G12370.1 Poptr1|572310  
Poptr1|552213  
Poptr1|552212  
AT1G32260.1,AT2G35480.1 Poptr1|590048,Poptr1|554050  
Poptr1|579145  
AT4G37000.1 Poptr1|76116  
Poptr1|655153,Poptr1|696003  
Poptr1|590248  
AT3G26410.1 Poptr1|691255  
Poptr1|109222  
Poptr1|553470  
AT3G51050.1 Poptr1|593888,Poptr1|719639  
AT5G06140.1 Poptr1|701471  
Poptr1|561477  
AT3G54440.2 Poptr1|62897,Poptr1|693166  
AT3G21480.1 Poptr1|657895  
AT4G03130.1  
AT2G47380.1,AT5G61310.1 Poptr1|103505,Poptr1|348347,Poptr1|664345  
AT4G01210.1 Poptr1|572331,Poptr1|342783  
AT2G04900.1 Poptr1|573075  
AT4G33270.1,AT4G33260.1 Poptr1|571123,Poptr1|738273,Poptr1|583718  
AT4G22910.1,AT4G11920.1 Poptr1|554287  
AT5G13840.1 Poptr1|344984,Poptr1|698572  
AT5G26900.1,AT5G27570.1,AT5G27080.1  
AT5G27945.1  
Poptr1|575502,Poptr1|575501,Poptr1|576487  
Poptr1|691175  
AT1G71300.1,AT1G71270.1 Poptr1|560298  
AT1G21370.1 Poptr1|710769  
AT4G32130.1,AT2G25310.1 Poptr1|694974,Poptr1|669094  
AT5G63520.1 Poptr1|570286,Poptr1|701030,Poptr1|584712,Poptr1|568084  
Poptr1|570287  
Poptr1|585654  
Poptr1|570288  
AT5G38650.1,AT1G67250.1 Poptr1|704148,Poptr1|654101  
AT2G03690.1 Poptr1|696672  
Poptr1|659201  
AT4G20010.1 Poptr1|583053  
AT1G31010.1  
AT5G44785.2  
AT3G01170.1,AT5G15260.1 Poptr1|688945,Poptr1|556322  
AT4G36090.3,AT1G48980.1,AT2G17970.1 Poptr1|655456,Poptr1|689701  
Poptr1|741183  
AT3G24030.1 Poptr1|350647  
Poptr1|63107  
AT5G64670.1 Poptr1|46364,Poptr1|582327  
Poptr1|560062  
AT1G77090.1 Poptr1|710969  
AT1G55000.1 Poptr1|699753  
Poptr1|104701,Poptr1|595610,Poptr1|595619  
AT4G24840.1 Poptr1|346008,Poptr1|57667  
AT4G30500.1,AT2G23940.1 Poptr1|47897  
Poptr1|653629  
AT3G05000.1 Poptr1|595512,Poptr1|570929  
AT4G24440.1 Poptr1|716390  
AT5G03900.2 Poptr1|714116  
AT1G29420.1,AT1G29490.1,AT1G29450.1,AT1G29500.1,AT1G29510.1,AT1G29460.1,AT1G29430.1,AT5G27780.1,A  
T1G29440.1 Poptr1|557024,Poptr1|591374,Poptr1|557023  
Poptr1|557021,Poptr1|546297,Poptr1|556703,Poptr1|557022,Poptr1|58296,Poptr1|577305

Poptr1|72635  
 Poptr1|577306,Poptr1|577308  
 Poptr1|577303  
 AT5G59560.1 Poptr1|547822,Poptr1|555033  
 Poptr1|593302  
 AT1G69485.1,AT1G26740.1 Poptr1|659270,Poptr1|656465  
 AT2G01690.2 Poptr1|354298,Poptr1|55199  
 AT5G45610.1 Poptr1|103879,Poptr1|349948,Poptr1|105926,Poptr1|356700  
 AT3G52050.1 Poptr1|745062  
 AT4G30240.1,AT2G18860.1 Poptr1|578603,Poptr1|670618  
 AT1G27700.1 Poptr1|703166  
 AT4G27010.1 Poptr1|700019  
 AT1G72270.1  
 Poptr1|569127  
 AT3G58800.1 Poptr1|552253  
 AT1G15780.1 Poptr1|592675  
 AT2G10440.1  
 AT1G15770.1  
 Poptr1|349338,Poptr1|349341,Poptr1|590553,Poptr1|349310,Poptr1|588927,Poptr1|592670,Poptr1|10155  
 4  
 Poptr1|588926,Poptr1|548805  
 Poptr1|62854  
 Poptr1|560315,Poptr1|705137,Poptr1|576085,Poptr1|645748  
 Poptr1|590554,Poptr1|349323,Poptr1|703249  
 Poptr1|675741,Poptr1|640823,Poptr1|677012  
 Poptr1|597050,Poptr1|553518,Poptr1|591629,Poptr1|553495  
 Poptr1|590485  
 AT5G23060.1 Poptr1|596510  
 AT1G07040.1 Poptr1|696290  
 AT1G27020.1,AT1G27030.1  
 AT2G43030.1 Poptr1|56750  
 AT1G50510.1 Poptr1|549043  
 Poptr1|557900  
 AT4G30620.1,AT2G24020.1 Poptr1|702236  
 AT1G43580.1 Poptr1|692794  
 Poptr1|559388  
 AT2G23090.1 Poptr1|572056,Poptr1|644054  
 Poptr1|663761  
 Poptr1|592054  
 AT3G58130.1,AT2G27340.3 Poptr1|345662  
 Poptr1|580631  
 AT2G28605.1 Poptr1|75655,Poptr1|558460  
 Poptr1|561320  
 AT5G15050.1 Poptr1|701801,Poptr1|714491  
 AT3G24040.1 Poptr1|48568  
 AT3G03690.1 Poptr1|730069  
 AT1G71070.1 Poptr1|658798,Poptr1|696538  
 AT3G15350.1 Poptr1|568903,Poptr1|742976  
 AT2G37585.1 Poptr1|694964  
 AT4G03340.1,AT1G03520.1 Poptr1|56870,Poptr1|580358  
 AT5G39990.1  
 AT4G27480.1  
 AT1G53100.1  
 Poptr1|720100  
 Poptr1|725281  
 AT1G51730.1 Poptr1|683316,Poptr1|640963  
 AT4G27350.1,AT5G54240.1 Poptr1|568976  
 Poptr1|97893  
 Poptr1|671830  
 Poptr1|592571  
 AT2G45150.1,AT3G60620.1 Poptr1|679341  
 AT1G32080.1 Poptr1|646321  
 AT2G07687.1,ATMG00730.1 Poptr1|596151  
 Poptr1|676931  
 AT3G22480.1 Poptr1|564852,Poptr1|706154  
 AT5G13780.1 Poptr1|650021,Poptr1|691444  
 AT5G14850.1 Poptr1|737878  
 Poptr1|595983,Poptr1|561395  
 AT5G58030.1 Poptr1|578770,Poptr1|717812  
 AT5G40960.1 Poptr1|689955,Poptr1|549717  
 AT3G27030.1,AT3G01950.1,AT5G63500.1,AT5G14110.1,AT5G40980.1,AT3G48660.1  
 Poptr1|641826,Poptr1|597135,Poptr1|48581,Poptr1|554768,Poptr1|641828,Poptr1|554767,Poptr1|666686,  
 Poptr1|707046,Poptr1|575374,Poptr1|662168,Poptr1|64970,Poptr1|597133,Poptr1|597131  
 AT5G50560.1,AT5G50660.1  
 AT5G40970.1  
 Poptr1|597134  
 AT5G43150.1 Poptr1|644047,Poptr1|639757,Poptr1|555140  
 AT3G52570.1 Poptr1|576571  
 Poptr1|595199  
 Poptr1|595197,Poptr1|595195  
 AT4G10030.1 Poptr1|574189  
 AT2G37500.1 Poptr1|705148

Poptr1|575522  
AT1G79975.1 Poptr1|693707  
Poptr1|640702  
AT5G12410.1 Poptr1|722978,Poptr1|549036  
AT3G06580.1 Poptr1|723945,Poptr1|686369  
AT2G11000.1 Poptr1|560565  
Poptr1|669735  
Poptr1|680181  
ATCG00540.1 Poptr1|588011  
Poptr1|593514  
Poptr1|552256  
Poptr1|568602  
AT2G43290.1,AT3G59440.1 Poptr1|562236,Poptr1|741464  
AT5G37770.1,AT3G07490.1,AT3G03410.1,AT5G44460.1,AT3G10190.1,AT1G18530.1,AT1G32250.1,AT3G03400.1,AT5G42380.1,AT1G62820.1,AT2G41410.1,AT3G01830.1,AT1G66400.1,AT1G21550.1,AT2G15680.1,AT3G22930.1,AT1G24620.1,AT4G20780.1,AT2G41100.1,AT3G50770.1,AT1G12310.1,AT5G49480.1,AT2G41090.1,AT3G50360.1,AT4G37010.2,AT1G76640.1,AT1G76650.1,AT1G73630.1,AT3G25600.1,AT5G17470.1  
Poptr1|577233,Poptr1|651063,Poptr1|702296,Poptr1|648114,Poptr1|693490,Poptr1|351579,Poptr1|564376,Poptr1|701333,Poptr1|72514,Poptr1|551505,Poptr1|56977,Poptr1|64932,Poptr1|658975,Poptr1|560431,Poptr1|657221,Poptr1|697325,Poptr1|342394,Poptr1|645262,Poptr1|551911,Poptr1|655240,Poptr1|648111,Poptr1|554051,Poptr1|592402,Poptr1|666641,Poptr1|676209,Poptr1|698324,Poptr1|687739,Poptr1|593988,Poptr1|554258,Poptr1|694939,Poptr1|583581,Poptr1|709938,Poptr1|671189  
AT3G03000.1 Poptr1|346261  
AT1G18210.1 Poptr1|666293  
AT4G14640.1 Poptr1|658458  
AT3G43810.1 Poptr1|723414  
AT3G29000.1,AT5G39670.1 Poptr1|712797,Poptr1|577660  
AT4G03290.1  
AT3G03430.1,AT5G17480.1  
AT2G36180.1  
AT2G27030.3  
AT5G21274.1  
AT3G56800.1,AT2G41110.1  
AT1G66410.1,AT5G37780.1  
AT3G47480.1  
Poptr1|345327,Poptr1|596498,Poptr1|645381,Poptr1|709761,Poptr1|562983,Poptr1|551119,Poptr1|672610,Poptr1|580673  
Poptr1|584868  
Poptr1|593142,Poptr1|588561  
Poptr1|559611  
Poptr1|595431  
Poptr1|583392  
Poptr1|560295  
Poptr1|576061  
Poptr1|564216  
AT2G38290.1 Poptr1|351934  
Poptr1|677959,Poptr1|670323,Poptr1|582118,Poptr1|103159,Poptr1|65190  
Poptr1|104205,Poptr1|352860,Poptr1|342276,Poptr1|593772,Poptr1|65191,Poptr1|670324,Poptr1|56639  
Poptr1|677326,Poptr1|52112  
Poptr1|106998  
Poptr1|584869  
Poptr1|577018  
Poptr1|595409  
AT1G76400.1 Poptr1|559983,Poptr1|550740  
AT5G13970.1 Poptr1|572861,Poptr1|553118  
AT5G13310.1  
AT5G51880.1 Poptr1|575740  
Poptr1|570531  
AT4G07390.1 Poptr1|591998  
AT5G59470.1  
AT5G47890.1 Poptr1|693300,Poptr1|708898  
AT3G54130.1 Poptr1|701582,Poptr1|560868  
AT4G24930.1 Poptr1|575370  
Poptr1|579404  
Poptr1|356066  
AT5G51150.1 Poptr1|575511,Poptr1|588174  
Poptr1|661533  
AT1G72490.1,AT1G17400.1 Poptr1|553587,Poptr1|98986  
Poptr1|589305  
AT3G22942.1 Poptr1|667013  
AT3G63420.1  
Poptr1|346925  
Poptr1|551433  
AT2G31890.1 Poptr1|99539  
AT1G63680.1 Poptr1|63533  
AT2G21970.1 Poptr1|715978  
Poptr1|562701  
AT5G60600.1 Poptr1|686925,Poptr1|703591  
AT5G52840.1 Poptr1|648277,Poptr1|741118  
AT4G28005.1  
AT3G52300.1 Poptr1|724897,Poptr1|655958  
AT5G23535.1 Poptr1|647824

AT5G55570.1 Poptr1|109182,Poptr1|98792  
 Poptr1|590261  
 AT5G53000.1 Poptr1|732860,Poptr1|569566  
 AT3G47630.2 Poptr1|63286  
 Poptr1|573189  
 AT1G79750.1 Poptr1|711993,Poptr1|691291  
 AT2G13560.1 Poptr1|692496,Poptr1|591812  
 AT4G00570.1 Poptr1|552135,Poptr1|700205  
 Poptr1|108035,Poptr1|689007,Poptr1|561733  
 Poptr1|689114  
 AT3G61710.1 Poptr1|684315  
 AT5G04830.1 Poptr1|698787  
 Poptr1|563550  
 AT1G54140.1 Poptr1|548570  
 Poptr1|584106  
 AT2G41430.1 Poptr1|576219,Poptr1|695573  
 Poptr1|690883,Poptr1|712669  
 AT5G53050.3 Poptr1|57468,Poptr1|687709  
 AT1G56320.1 Poptr1|581320,Poptr1|581948  
 Poptr1|564420  
 AT3G57940.1,AT1G10490.1 Poptr1|562730  
 Poptr1|71742  
 AT3G07910.1 Poptr1|649853,Poptr1|641469,Poptr1|647300  
 AT1G55670.1 Poptr1|744852,Poptr1|550669  
 AT3G09085.1 Poptr1|576919,Poptr1|648298,Poptr1|653085  
 AT1G67850.1 Poptr1|686196,Poptr1|726215  
 AT2G28310.1,AT1G08040.1 Poptr1|686928  
 AT3G27470.1 Poptr1|577479  
 AT1G61240.1,AT1G11170.1 Poptr1|694022  
 AT1G24570.1  
 AT3G26440.1  
 AT1G13000.1  
 Poptr1|742556,Poptr1|583482  
 Poptr1|568275  
 Poptr1|568274  
 Poptr1|738616  
 AT5G09920.1 Poptr1|71733,Poptr1|695933  
 Poptr1|671996  
 AT4G36400.1 Poptr1|76361  
 Poptr1|104884  
 Poptr1|590557  
 AT1G14850.1 Poptr1|564669,Poptr1|566438  
 AT5G17670.1 Poptr1|699937  
 AT3G15351.1 Poptr1|678366,Poptr1|644290  
 Poptr1|591690  
 AT1G53030.1,AT3G15352.1 Poptr1|742995,Poptr1|660952  
 AT1G53035.1,AT3G15358.1 Poptr1|98213,Poptr1|579464,Poptr1|568897  
 Poptr1|591069  
 Poptr1|693939,Poptr1|743813  
 AT2G39630.1 Poptr1|659690,Poptr1|696859  
 AT5G67290.1 Poptr1|558391  
 Poptr1|72050  
 AT1G77110.1 Poptr1|52012,Poptr1|342377  
 AT5G15100.1 Poptr1|58367,Poptr1|545911  
 AT5G16530.1 Poptr1|574049,Poptr1|689942  
 AT1G73590.1 Poptr1|699525,Poptr1|575003  
 AT1G23080.1,AT1G70940.1 Poptr1|726892,Poptr1|345301  
 AT5G57090.1 Poptr1|58808  
 AT2G01420.2  
 Poptr1|701309,Poptr1|560374  
 Poptr1|106029  
 Poptr1|48867  
 Poptr1|590578  
 AT4G00231.1 Poptr1|572162  
 Poptr1|572161  
 Poptr1|564893  
 AT3G48200.1 Poptr1|345962  
 Poptr1|64957  
 AT4G28290.1 Poptr1|590603,Poptr1|670580,Poptr1|574401,Poptr1|582706  
 Poptr1|642517  
 AT2G38020.1 Poptr1|72705,Poptr1|342326  
 Poptr1|677307  
 Poptr1|583003  
 AT4G28740.1 Poptr1|688391  
 Poptr1|553270  
 AT5G10710.1 Poptr1|578394  
 Poptr1|674435  
 Poptr1|674434  
 AT5G14600.1 Poptr1|702280  
 AT5G63220.1 Poptr1|655962,Poptr1|659817  
 AT2G36900.1,AT5G50440.1 Poptr1|688007  
 AT2G45990.1 Poptr1|700228

AT5G51030.1 Poptr1|570377  
 AT2G24190.1,AT3G61220.1 Poptr1|552146  
 AT3G59710.1 Poptr1|745034  
 AT5G61830.1  
 AT1G01800.1  
 Poptr1|593272,Poptr1|666781  
 Poptr1|572216,Poptr1|748333,Poptr1|552140,Poptr1|584359,Poptr1|705523,Poptr1|552144,Poptr1|552144  
 2  
 Poptr1|649001,Poptr1|681143,Poptr1|742665  
 Poptr1|107054,Poptr1|705430  
 Poptr1|572215  
 Poptr1|552141  
 AT5G65490.1 Poptr1|589363  
 Poptr1|581556  
 Poptr1|581557  
 AT2G30410.1 Poptr1|571333  
 AT5G62140.1 Poptr1|570516  
 AT5G60540.1 Poptr1|723563  
 AT3G28710.1,AT3G28715.1 Poptr1|701812  
 AT4G27630.2,AT1G64990.1 Poptr1|730225  
 Poptr1|574002  
 AT5G39410.1 Poptr1|556357  
 AT3G01920.1 Poptr1|707019  
 Poptr1|108714  
 AT5G06430.1 Poptr1|591889  
 AT1G61280.1 Poptr1|551932,Poptr1|591815  
 Poptr1|581146  
 AT4G10020.1 Poptr1|574179,Poptr1|59565  
 AT5G50590.1,AT5G50690.1 Poptr1|576285,Poptr1|576284,Poptr1|688548,Poptr1|57688,Poptr1|728483  
 AT3G03330.1 Poptr1|596953  
 AT5G50770.1  
 AT3G47350.1,AT3G47360.1  
 AT5G50700.1,AT5G50600.1  
 AT3G03350.1  
 AT1G18340.1 Poptr1|559224  
 Poptr1|585896,Poptr1|705650,Poptr1|591176  
 AT2G05620.1 Poptr1|658055,Poptr1|696356  
 AT5G53850.2 Poptr1|689976,Poptr1|55955  
 AT2G29540.1 Poptr1|641125  
 AT1G34350.1 Poptr1|703191,Poptr1|574299  
 AT1G54780.1 Poptr1|570885,Poptr1|595551  
 AT5G38880.1 Poptr1|61041,Poptr1|60934  
 AT1G59840.1 Poptr1|719824  
 Poptr1|589698  
 Poptr1|589697  
 AT5G42480.1 Poptr1|694820  
 AT5G54440.1 Poptr1|726951  
 AT4G25150.1,AT4G29260.1,AT4G29270.1,AT5G51260.1 Poptr1|352101  
 AT2G38600.1 Poptr1|653235,Poptr1|734385  
 AT2G39920.1 Poptr1|698535  
 AT5G44020.1,AT1G04040.1 Poptr1|711542,Poptr1|658058  
 Poptr1|705837,Poptr1|681116  
 Poptr1|593609  
 AT2G02050.1 Poptr1|698137,Poptr1|696475  
 AT5G59980.1 Poptr1|558126  
 AT1G12370.2 Poptr1|704231  
 AT1G24040.1 Poptr1|566331,Poptr1|564771  
 AT1G55090.1 Poptr1|343709,Poptr1|63385  
 AT2G23840.1 Poptr1|730016,Poptr1|573904  
 Poptr1|107074  
 AT1G65020.1 Poptr1|47594,Poptr1|663292,Poptr1|597578  
 Poptr1|597577  
 AT1G07830.1 Poptr1|644722,Poptr1|47648  
 AT1G08380.1 Poptr1|648969,Poptr1|741765  
 AT3G16240.1 Poptr1|645978,Poptr1|640897  
 AT3G47440.1 Poptr1|350040,Poptr1|346320  
 AT1G17810.1,AT1G73190.1 Poptr1|690449,Poptr1|99886  
 AT2G25810.1 Poptr1|561759  
 AT4G17340.1,AT5G47450.1 Poptr1|646117,Poptr1|589870  
 AT4G01470.1 Poptr1|563850,Poptr1|567479  
 AT2G36830.1,AT3G26520.1 Poptr1|702770,Poptr1|576791  
 AT1G52180.1  
 Poptr1|680648  
 Poptr1|549212,Poptr1|697670  
 Poptr1|562841  
 Poptr1|704832,Poptr1|558321  
 AT1G01290.1 Poptr1|572402  
 Poptr1|102406  
 AT3G27100.1 Poptr1|742850,Poptr1|707006  
 AT4G25720.1 Poptr1|693830,Poptr1|592908  
 AT5G64160.1 Poptr1|645709,Poptr1|645711  
 Poptr1|645710,Poptr1|548794



AT3G54690.1 Poptr1|710940,Poptr1|559710  
 Poptr1|108986  
 AT5G24680.1 Poptr1|355454  
 AT5G13030.1 Poptr1|48466  
 AT1G63780.1 Poptr1|647273,Poptr1|708527  
 AT4G34200.1 Poptr1|697350,Poptr1|691742  
 AT1G17745.1 Poptr1|698762,Poptr1|563476  
 AT3G19480.1  
 Poptr1|596153,Poptr1|592006,Poptr1|579075,Poptr1|551818,Poptr1|596898  
 Poptr1|108883  
 Poptr1|583776  
 AT3G28430.1 Poptr1|736659,Poptr1|351655  
 Poptr1|561427  
 Poptr1|571337  
 AT2G20890.1 Poptr1|574584,Poptr1|663549  
 AT5G27990.1 Poptr1|595474,Poptr1|570967  
 AT3G22510.1 Poptr1|566237  
 AT2G18250.1 Poptr1|356962  
 AT4G33625.1 Poptr1|562369,Poptr1|736007  
 AT1G80380.2 Poptr1|683725  
 Poptr1|645892  
 Poptr1|711844  
 AT1G03980.1,AT5G44070.1 Poptr1|573410  
 Poptr1|553336  
 Poptr1|553337  
 AT5G55290.1 Poptr1|687538,Poptr1|707599  
 AT4G26710.1  
 AT1G80190.1 Poptr1|589281  
 Poptr1|593186  
 AT5G06360.1 Poptr1|653375,Poptr1|667614  
 Poptr1|667616  
 AT1G10240.1 Poptr1|596766  
 AT1G76320.1 Poptr1|647221  
 AT4G15090.1 Poptr1|351268  
 AT2G32250.1 Poptr1|701252  
 AT5G18960.1,AT3G06250.1 Poptr1|354904,Poptr1|565675  
 AT3G07500.1 Poptr1|732614  
 AT4G38170.1 Poptr1|560012,Poptr1|59902  
 AT2G27110.1 Poptr1|649000,Poptr1|741723  
 AT4G12850.1 Poptr1|57381  
 AT3G22170.1 Poptr1|734562,Poptr1|560233  
 AT5G28530.1 Poptr1|573101  
 AT1G52520.1 Poptr1|592701  
 AT3G59470.1 Poptr1|562227,Poptr1|594526  
 AT1G80010.1  
 Poptr1|354058,Poptr1|552498  
 Poptr1|62985  
 Poptr1|575990,Poptr1|350060  
 Poptr1|562233,Poptr1|654460,Poptr1|553130,Poptr1|562235  
 Poptr1|563499  
 Poptr1|567843  
 Poptr1|578229,Poptr1|352945,Poptr1|592702  
 Poptr1|683244  
 Poptr1|564110  
 AT5G67500.1 Poptr1|693597,Poptr1|716342  
 AT3G01280.1 Poptr1|696288,Poptr1|565435,Poptr1|701809  
 AT1G18870.1,AT1G74710.2 Poptr1|569985  
 AT5G57490.1 Poptr1|669455,Poptr1|580465  
 AT3G49920.1  
 AT5G37610.1  
 AT5G15090.1  
 Poptr1|700129  
 Poptr1|65288,Poptr1|65287,Poptr1|557513  
 Poptr1|557515  
 Poptr1|569990  
 AT4G14890.1 Poptr1|658518,Poptr1|564845  
 AT1G10960.1,AT1G60950.1 Poptr1|49513,Poptr1|746001,Poptr1|579101,Poptr1|645629  
 AT2G27510.1 Poptr1|696999,Poptr1|660158,Poptr1|697070,Poptr1|594972  
 AT5G10000.1  
 Poptr1|98106  
 AT5G01210.1 Poptr1|576934,Poptr1|560885  
 AT5G38130.1,AT5G67160.1,AT5G67150.1,AT3G50300.1,AT3G50270.1,AT3G50280.1  
 Poptr1|553688,Poptr1|587255,Poptr1|705470  
 AT5G23940.1 Poptr1|688629,Poptr1|570424  
 AT5G07860.1,AT5G42830.1,AT5G07850.1,AT5G07870.1 Poptr1|591982,Poptr1|591983  
 AT2G39980.1 Poptr1|567307,Poptr1|563985  
 Poptr1|570420  
 Poptr1|108593  
 AT1G12780.1,AT1G63180.1 Poptr1|693451  
 AT1G30620.1 Poptr1|550555,Poptr1|699226  
 AT4G10960.1,AT4G23920.1 Poptr1|646762,Poptr1|683654  
 AT4G20460.1,AT5G44480.1

AT2G34850.1  
AT1G64440.1  
    Poptr1|548448  
    Poptr1|344034,Poptr1|688657  
    Poptr1|106108  
AT1G22160.1,AT1G78020.1    Poptr1|551545,Poptr1|694525  
AT5G49120.1    Poptr1|657857,Poptr1|703724  
AT2G44670.1    Poptr1|689538,Poptr1|551980  
AT1G53885.1    Poptr1|584157,Poptr1|349683  
AT5G47060.1,AT4G17670.1    Poptr1|690016,Poptr1|589944  
AT5G65040.1  
    Poptr1|718828,Poptr1|558563  
AT4G34370.1,AT2G16090.1    Poptr1|697303  
AT1G65430.1    Poptr1|686426,Poptr1|724340  
AT3G27720.1,AT3G27710.1  
AT2G31510.1  
AT5G63730.1  
    Poptr1|556428  
    Poptr1|551904  
    Poptr1|347704  
AT1G67480.1    Poptr1|565042,Poptr1|658140,Poptr1|592319  
AT1G27420.1  
AT2G38770.1    Poptr1|693176  
    Poptr1|547843  
AT1G13690.1    Poptr1|686382  
    Poptr1|659197  
AT1G09340.1    Poptr1|581662,Poptr1|687905  
AT2G35760.1    Poptr1|575900  
AT4G16442.1  
AT1G30610.1    Poptr1|550557  
AT5G67570.1    Poptr1|76499  
AT1G55120.1,AT3G13790.1,AT3G13784.1    Poptr1|561648  
AT1G12240.1,AT1G62660.1    Poptr1|350217,Poptr1|711782  
AT3G52600.1,AT2G36190.1    Poptr1|685605,Poptr1|576574,Poptr1|58055  
    Poptr1|716776  
    Poptr1|733965  
AT5G39790.1    Poptr1|553002  
AT4G04790.1    Poptr1|571481  
AT4G21880.1  
    Poptr1|569074  
    Poptr1|569075  
AT5G57240.1,AT4G25860.1,AT4G25850.1    Poptr1|351684  
AT1G19710.1,AT1G75420.1    Poptr1|346389  
    Poptr1|643063  
    Poptr1|643064  
AT4G29950.1,AT2G19240.1    Poptr1|344200,Poptr1|58821  
AT5G57210.1  
AT5G59890.1,AT3G46010.1  
    Poptr1|683835,Poptr1|720178,Poptr1|558102,Poptr1|691417,Poptr1|567460,Poptr1|650298  
AT2G31200.1    Poptr1|682001,Poptr1|685386  
AT2G16700.1    Poptr1|648773,Poptr1|649239  
AT5G52360.1,AT4G25590.1    Poptr1|570479,Poptr1|699309  
AT4G00680.1  
AT3G45990.1,AT3G46000.1  
AT5G59880.1  
AT4G34970.1  
AT1G01750.1  
    Poptr1|552672  
AT5G11340.1    Poptr1|654093,Poptr1|669001  
AT2G40840.1    Poptr1|695619,Poptr1|576090  
AT5G64860.1    Poptr1|718902  
AT3G48425.1    Poptr1|575282  
AT1G63810.1    Poptr1|76302  
    Poptr1|593934  
AT2G31970.1    Poptr1|49250  
AT5G04600.1    Poptr1|660197  
AT4G32320.1    Poptr1|561901  
AT1G77490.1    Poptr1|559250,Poptr1|342411  
AT4G35000.1    Poptr1|556634,Poptr1|557084  
AT3G09640.1    Poptr1|576642,Poptr1|650416,Poptr1|675956  
AT4G08390.1  
AT1G33660.1,AT1G07890.1  
    Poptr1|679120  
    Poptr1|560797,Poptr1|560799  
AT3G18480.1    Poptr1|569871  
AT3G55060.1    Poptr1|656002,Poptr1|698621  
AT2G39300.1  
AT5G15920.1    Poptr1|549282  
AT4G02110.1    Poptr1|552514,Poptr1|572632  
AT1G68795.1    Poptr1|566680,Poptr1|564482  
AT1G49005.1,AT1G73965.1  
    Poptr1|569854

AT1G15370.1 Poptr1|705867  
Poptr1|671152,Poptr1|561892  
AT1G05710.2,AT2G31730.1 Poptr1|582754  
AT2G20100.1,AT4G29100.1 Poptr1|640889,Poptr1|645971,Poptr1|578495  
AT1G27660.1 Poptr1|651969,Poptr1|643076  
Poptr1|698595,Poptr1|656060  
Poptr1|563203,Poptr1|593900  
AT3G02490.1,AT5G15980.1 Poptr1|545694,Poptr1|545697,Poptr1|580736  
AT3G48250.1 Poptr1|57624  
AT5G26110.1 Poptr1|643275  
AT1G08120.1  
AT1G09190.1 Poptr1|581936  
Poptr1|593672  
AT2G20900.1,AT4G28130.1 Poptr1|744645  
Poptr1|663551  
AT4G34150.1 Poptr1|691738,Poptr1|649601  
Poptr1|347628  
AT1G30970.1 Poptr1|343398,Poptr1|676356  
AT3G29390.1 Poptr1|577747  
Poptr1|577748  
AT5G53870.1 Poptr1|568885,Poptr1|703941,Poptr1|560589  
AT5G24710.1 Poptr1|695451  
AT1G75220.1,AT1G19450.1 Poptr1|343223  
AT3G18830.1 Poptr1|556444,Poptr1|557280  
AT1G11260.1 Poptr1|568307,Poptr1|694037  
AT5G26340.1 Poptr1|686252,Poptr1|726589  
AT5G61520.1 Poptr1|58210,Poptr1|596837  
AT5G16150.1 Poptr1|546475  
AT5G59250.1 Poptr1|706102  
AT1G50310.1,AT3G19940.1 Poptr1|75929,Poptr1|75938,Poptr1|71789,Poptr1|562794,Poptr1|562795  
AT2G20780.1 Poptr1|56857  
AT3G05960.1,AT5G26250.1 Poptr1|345395,Poptr1|354450  
AT2G48020.1 Poptr1|692220  
AT3G03090.1,AT5G17010.1 Poptr1|738679  
AT2G18480.1,AT4G36670.1 Poptr1|53365  
AT4G02050.1 Poptr1|716789,Poptr1|702268  
AT2G35740.1,AT4G16480.1 Poptr1|351223,Poptr1|667113  
AT5G27350.1,AT1G08930.1,AT1G08920.2,AT3G05165.1,AT5G27360.1,AT3G05160.1  
Poptr1|595569,Poptr1|699781,Poptr1|742204  
AT1G79820.1 Poptr1|705740  
AT1G05030.1 Poptr1|591661  
AT2G43330.1 Poptr1|679556  
AT1G34580.1 Poptr1|342477,Poptr1|347376  
AT1G67300.2 Poptr1|58658  
AT2G16130.1,AT2G16120.1  
AT4G21480.1  
AT3G19930.1  
AT5G23270.1  
AT3G05150.1  
AT1G30220.1  
AT3G05400.1  
AT1G08890.1  
Poptr1|76305  
Poptr1|580034  
Poptr1|106628  
Poptr1|592645,Poptr1|60953  
Poptr1|581977  
Poptr1|589816,Poptr1|546575  
Poptr1|548516  
Poptr1|596838,Poptr1|596839  
Poptr1|670921  
Poptr1|743757  
Poptr1|546385  
Poptr1|54710,Poptr1|549094  
Poptr1|354451,Poptr1|55142  
Poptr1|657137  
Poptr1|731956  
Poptr1|572782  
Poptr1|552631  
Poptr1|597703  
Poptr1|560187  
Poptr1|570897  
Poptr1|591666  
Poptr1|347825  
Poptr1|103428,Poptr1|677966,Poptr1|680200,Poptr1|685931,Poptr1|670235,Poptr1|680198  
Poptr1|679557  
AT5G03170.1 Poptr1|739430,Poptr1|576678  
AT5G60490.1  
Poptr1|570768,Poptr1|595056,Poptr1|728480,Poptr1|103363,Poptr1|723575,Poptr1|549783,Poptr1|72865  
0,Poptr1|661522,Poptr1|574750,Poptr1|575682  
AT5G44130.1,AT1G03870.1 Poptr1|665850,Poptr1|592161  
AT2G04780.1 Poptr1|711438,Poptr1|573060

AT2G20520.1  
Poptr1|558258,Poptr1|595206,Poptr1|571846,Poptr1|579530,Poptr1|665967,Poptr1|102990,Poptr1|57184  
4  
Poptr1|574548,Poptr1|574550  
AT5G27650.1,AT3G05430.1 Poptr1|744505  
AT1G48560.1 Poptr1|350946  
Poptr1|581799  
AT3G01750.1 Poptr1|565075,Poptr1|706911  
AT3G04140.1  
AT1G71730.1 Poptr1|559430,Poptr1|579720,Poptr1|347080  
AT2G22250.3 Poptr1|695900,Poptr1|71675  
AT3G21540.1 Poptr1|739600  
AT1G10140.1,AT1G58420.1 Poptr1|663718,Poptr1|347570  
Poptr1|571985,Poptr1|563345  
AT1G22040.1 Poptr1|643710,Poptr1|651336  
AT5G37370.1 Poptr1|714289,Poptr1|689668  
AT1G24706.1 Poptr1|574075,Poptr1|346457  
Poptr1|665597  
AT2G01100.1,AT4G19190.1 Poptr1|596871,Poptr1|565312  
AT1G56290.1 Poptr1|569059  
Poptr1|555467  
AT1G50300.1 Poptr1|564190,Poptr1|724203  
AT5G54750.1 Poptr1|571491  
AT1G68010.1 Poptr1|713354  
Poptr1|649205  
AT1G04030.1,AT5G44040.1 Poptr1|553323  
AT4G03120.1 Poptr1|693717  
AT1G51630.1,AT3G21190.1 Poptr1|725306,Poptr1|563468  
Poptr1|575478  
AT1G52230.1,AT3G16140.1 Poptr1|693693  
AT4G04350.1 Poptr1|698831  
AT3G55400.1 Poptr1|687363  
Poptr1|108347  
AT5G08160.1 Poptr1|742436,Poptr1|569832  
AT3G42660.1 Poptr1|661832  
Poptr1|661833  
Poptr1|574885  
AT1G79270.1 Poptr1|567126,Poptr1|564146  
AT3G13460.1,AT1G55500.1 Poptr1|639601,Poptr1|647427  
AT1G09810.1 Poptr1|745557,Poptr1|681024  
AT5G58190.2 Poptr1|563373,Poptr1|99222,Poptr1|560707  
AT5G61020.1  
AT3G13060.2  
AT1G27960.1  
Poptr1|681025  
Poptr1|573919  
AT5G58130.1 Poptr1|584525,Poptr1|560716  
AT1G72440.1 Poptr1|60982  
AT1G52380.1,AT3G15970.1 Poptr1|63774,Poptr1|693711  
AT3G01160.1 Poptr1|356840  
AT5G53900.2 Poptr1|742956,Poptr1|55952  
AT3G15240.1  
AT3G15230.1  
AT5G01090.1,AT3G09035.1 Poptr1|667954,Poptr1|351859  
AT3G54080.1  
Poptr1|659588  
AT3G57690.1,AT2G41905.1 Poptr1|557757,Poptr1|576320,Poptr1|583600  
AT3G20865.1  
AT2G21280.1 Poptr1|697230  
Poptr1|107638  
AT2G21960.1 Poptr1|685182  
AT2G41640.1,AT3G57380.1 Poptr1|576368,Poptr1|652692  
AT3G18170.1,AT3G18180.1 Poptr1|574960,Poptr1|569780,Poptr1|574959  
AT3G10320.1  
Poptr1|355526  
AT5G21940.1 Poptr1|578015,Poptr1|561575  
AT3G43850.1  
AT4G17050.1 Poptr1|589924  
Poptr1|704030  
AT4G20130.1 Poptr1|554613  
AT1G50450.1 Poptr1|557885  
AT4G10130.1 Poptr1|591922  
AT5G23200.1 Poptr1|71798  
AT5G08270.1  
Poptr1|558687  
AT4G22540.1,AT4G12460.1 Poptr1|350072,Poptr1|704262  
AT2G31020.1,AT4G08180.1 Poptr1|684498  
AT1G13170.1 Poptr1|726179  
AT2G31030.1  
AT1G77730.1  
Poptr1|573613  
Poptr1|559189

Poptr1|582185,Poptr1|573533  
Poptr1|559190  
Poptr1|354731  
AT1G13570.1 Poptr1|566718  
Poptr1|354075  
Poptr1|703081,Poptr1|692506  
Poptr1|580732  
AT5G56130.1 Poptr1|691975  
AT2G47990.1 Poptr1|57235,Poptr1|552640  
AT2G26350.1 Poptr1|717083  
AT5G64710.1,AT5G09840.1 Poptr1|580004,Poptr1|65166  
AT4G28450.1 Poptr1|689755,Poptr1|562167  
AT1G27840.3,AT1G19750.1 Poptr1|700128  
AT4G30350.1,AT5G57710.1 Poptr1|653660  
Poptr1|669488  
AT2G37990.1 Poptr1|559764  
AT1G49670.1 Poptr1|686729  
AT1G70590.1 Poptr1|658283,Poptr1|354784  
Poptr1|108250,Poptr1|595316  
AT2G28230.1,AT4G09070.1 Poptr1|739120  
AT2G28020.1  
Poptr1|593974  
AT1G21570.1 Poptr1|347206,Poptr1|72511  
AT1G21580.1  
AT1G13160.1,AT4G31520.1 Poptr1|345516  
AT1G80760.1 Poptr1|63037,Poptr1|343829  
AT4G10380.1 Poptr1|691926,Poptr1|687640  
AT5G37820.1,AT5G37810.1 Poptr1|552968  
AT4G19030.1,AT4G18910.1 Poptr1|647823,Poptr1|728117  
AT3G06100.1 Poptr1|354947  
AT2G34390.1  
AT1G31885.1  
AT2G29870.1  
Poptr1|347386  
Poptr1|566501  
Poptr1|579272  
AT4G36980.1 Poptr1|562971  
Poptr1|558865,Poptr1|716229  
AT2G37340.1,AT3G53500.2 Poptr1|667717,Poptr1|653760  
AT5G58370.2 Poptr1|574498  
Poptr1|571889  
AT4G04885.1 Poptr1|555362  
Poptr1|562193  
AT1G55980.1,AT1G56000.1 Poptr1|586878  
AT1G04730.1 Poptr1|48557  
AT3G27310.1 Poptr1|691457,Poptr1|722819  
Poptr1|584780,Poptr1|64884  
AT1G55160.1 Poptr1|597636  
Poptr1|561089  
AT3G11840.1 Poptr1|48937,Poptr1|576498,Poptr1|594188,Poptr1|561153,Poptr1|558224  
AT1G66160.1,AT5G37490.1  
Poptr1|345655,Poptr1|60338,Poptr1|566411,Poptr1|552899,Poptr1|556001,Poptr1|564694  
AT3G52450.1,AT2G35930.1 Poptr1|561154,Poptr1|576497,Poptr1|592470  
AT3G02840.1  
Poptr1|558225  
Poptr1|342820,Poptr1|48936  
AT1G60620.1,AT1G60850.1 Poptr1|550226  
AT4G16295.1 Poptr1|349059  
Poptr1|594949,Poptr1|556829,Poptr1|576466  
AT3G50560.1 Poptr1|696039,Poptr1|51840  
AT1G20225.1,AT1G76020.1 Poptr1|692998,Poptr1|715538  
AT2G22570.1 Poptr1|718516,Poptr1|685244  
Poptr1|107788  
AT5G61150.1 Poptr1|345873  
AT4G34730.1 Poptr1|694199  
AT5G27620.1 Poptr1|744494  
AT5G09310.1 Poptr1|650600  
Poptr1|718591  
AT3G11964.1 Poptr1|735126  
AT1G17760.1 Poptr1|693536  
AT5G17510.1,AT3G03460.1 Poptr1|56774  
Poptr1|574012  
AT2G31210.1,AT2G31220.1,AT1G06170.1 Poptr1|352156  
AT4G29490.1 Poptr1|653293  
AT4G29500.1  
AT3G27460.1,AT5G40550.1 Poptr1|691587  
AT1G75670.1 Poptr1|642995,Poptr1|715393  
AT1G11880.1 Poptr1|555232  
Poptr1|547638  
AT1G32320.1 Poptr1|356660  
AT5G14720.1 Poptr1|683902  
AT3G10540.1,AT5G04510.1 Poptr1|725165

AT5G20930.1 Poptr1|594899,Poptr1|721419  
AT5G66210.1 Poptr1|693587,Poptr1|593843  
AT5G66880.1,AT3G50500.1 Poptr1|71960  
AT3G15220.1 Poptr1|568866,Poptr1|579437  
AT5G40440.1 Poptr1|706774  
AT5G01820.1 Poptr1|577152  
AT5G45820.1 Poptr1|568702  
AT5G55090.1,AT4G26890.1 Poptr1|348618,Poptr1|568055,Poptr1|99321,Poptr1|572977  
AT5G25110.1,AT5G10930.1 Poptr1|702061,Poptr1|717890  
AT4G10730.1,AT4G24100.1 Poptr1|48658  
AT1G54510.1 Poptr1|595442,Poptr1|571018,Poptr1|684585  
AT1G51660.1,AT3G21220.1 Poptr1|563479,Poptr1|567821  
AT1G01140.3 Poptr1|342837,Poptr1|700319  
AT3G17510.1,AT1G48260.1 Poptr1|697782  
AT2G30040.1,AT1G07150.1 Poptr1|549424,Poptr1|557665  
AT3G56760.1,AT2G41140.1 Poptr1|701311,Poptr1|685826  
AT5G35410.1 Poptr1|560599,Poptr1|736564  
AT2G38910.1 Poptr1|561185,Poptr1|58017  
AT1G76040.2 Poptr1|342148,Poptr1|52238  
AT4G18700.1,AT5G45810.1 Poptr1|55888,Poptr1|555664,Poptr1|705486  
AT5G66850.1 Poptr1|76146,Poptr1|71969  
AT2G46700.1 Poptr1|700316,Poptr1|342832  
AT1G49180.1 Poptr1|586818  
AT3G50530.1 Poptr1|71979,Poptr1|53322  
AT1G12580.1 Poptr1|350160,Poptr1|728605,Poptr1|575756  
AT1G30270.1 Poptr1|578866,Poptr1|98752  
AT5G19450.1,AT5G12480.1 Poptr1|49050,Poptr1|722939  
AT1G74740.1,AT1G18890.1 Poptr1|345904,Poptr1|57559  
AT1G08650.1,AT3G04530.1 Poptr1|571090,Poptr1|573711  
AT3G61960.1 Poptr1|342855,Poptr1|572478  
AT3G08720.1,AT3G08730.1 Poptr1|577198,Poptr1|695351  
AT4G09570.1,AT1G35670.1 Poptr1|703202,Poptr1|574276  
AT5G67080.1,AT3G50310.1 Poptr1|562964,Poptr1|72010,Poptr1|558873  
AT5G56580.1 Poptr1|745168  
AT1G69220.1 Poptr1|698363  
AT4G14480.1 Poptr1|564934  
AT4G32830.1 Poptr1|695059,Poptr1|577912  
AT2G17290.1,AT4G35310.1 Poptr1|703578,Poptr1|54244  
AT1G02970.1 Poptr1|573439  
AT3G44200.1 Poptr1|54792  
AT4G23650.1 Poptr1|684864,Poptr1|691100  
AT1G73500.1,AT1G18350.1 Poptr1|661340,Poptr1|580618  
AT2G37840.1,AT3G53930.1 Poptr1|685725,Poptr1|58153  
AT2G45490.1 Poptr1|685762  
AT2G31500.1 Poptr1|53090  
AT2G26980.4 Poptr1|672762,Poptr1|650370  
AT4G40010.1 Poptr1|347410,Poptr1|695866,Poptr1|716472  
AT4G04740.1,AT4G21940.1,AT4G04720.1 Poptr1|544812,Poptr1|687463  
AT4G29810.2 Poptr1|577971,Poptr1|685693  
AT3G49370.1,AT5G24430.1 Poptr1|345760  
AT4G33950.1 Poptr1|704298,Poptr1|557335  
AT5G04870.1,AT3G10660.1 Poptr1|686560,Poptr1|725373  
AT3G06030.1 Poptr1|345391  
AT3G20860.1 Poptr1|683566,Poptr1|684756  
AT3G57530.1 Poptr1|560525,Poptr1|701375  
AT1G12680.1 Poptr1|52267  
AT3G45670.1,AT3G45790.1,AT3G46160.1,AT3G46140.1 Poptr1|587189,Poptr1|561361,Poptr1|554902  
AT1G10940.1,AT1G60940.1 Poptr1|584467  
AT1G63700.1 Poptr1|350243,Poptr1|570429,Poptr1|709332  
AT3G23000.1,AT4G14580.1 Poptr1|55097,Poptr1|354537  
AT5G07070.1,AT5G58380.1 Poptr1|739040  
AT3G45240.1,AT5G60550.1 Poptr1|682531  
AT1G53570.1 Poptr1|75602,Poptr1|558404  
AT4G30960.1 Poptr1|669608,Poptr1|561315,Poptr1|681270  
AT3G01090.2 Poptr1|577688,Poptr1|546638  
AT5G23580.1 Poptr1|689207  
AT1G79640.1 Poptr1|708402  
AT1G70430.1  
AT1G23700.1  
AT4G36070.1,AT2G17890.1  
AT2G38490.1  
AT2G32510.1,AT1G05100.1  
AT2G25090.1  
AT5G28290.1,AT3G04810.1  
AT3G63280.1  
AT4G24400.1  
AT2G34180.1,AT1G29230.1  
AT5G27510.1  
AT2G25880.1  
AT4G38230.1  
AT3G06230.1  
AT5G21326.1

AT1G78290.1  
 AT4G04710.1,AT4G04695.1,AT3G20410.1,AT1G50700.1  
 AT1G61950.1  
 AT4G04700.1  
 AT4G26070.3  
 AT3G12200.1  
 AT2G41860.2  
 AT2G05060.1,AT2G41930.1,AT5G27790.1  
 AT5G63650.1  
 AT3G29160.1  
 AT5G39440.1  
     Poptr1|104062  
     Poptr1|554393  
     Poptr1|647167  
     Poptr1|646816  
     Poptr1|646815  
     Poptr1|551883,Poptr1|703093  
     Poptr1|586814  
     Poptr1|581486  
     Poptr1|63612  
     Poptr1|571403  
     Poptr1|101324  
     Poptr1|355822  
     Poptr1|107875  
     Poptr1|348294  
     Poptr1|557110  
     Poptr1|594910  
     Poptr1|582696  
     Poptr1|556871  
     Poptr1|705895  
     Poptr1|354742,Poptr1|565983,Poptr1|590251  
     Poptr1|679560  
     Poptr1|743266  
     Poptr1|563495  
     Poptr1|58021,Poptr1|561172  
     Poptr1|667424,Poptr1|672911  
     Poptr1|651230  
     Poptr1|562413,Poptr1|685947  
     Poptr1|572661  
     Poptr1|665249,Poptr1|60652  
     Poptr1|349231  
     Poptr1|734288,Poptr1|573848  
     Poptr1|555254,Poptr1|639689  
     Poptr1|559202  
     Poptr1|705366  
     Poptr1|56841  
     Poptr1|597745  
     Poptr1|647398  
 AT5G03070.1           Poptr1|576659  
 AT3G06720.1           Poptr1|699703,Poptr1|697774,Poptr1|703707,Poptr1|690234  
 AT1G09270.1           Poptr1|570700  
 AT1G02690.2  
 AT3G05720.1  
 AT5G52000.1  
 AT4G16143.1,AT5G49310.1  
 AT1G32880.1  
     Poptr1|702716  
     Poptr1|581818,Poptr1|552496  
     Poptr1|731745  
 AT1G16430.1,AT1G07950.1           Poptr1|588031,Poptr1|564145  
 AT3G10670.1           Poptr1|563506  
 AT3G18940.1           Poptr1|648550  
     Poptr1|649485  
 AT4G30820.1           Poptr1|669544,Poptr1|653618  
 AT5G14260.1           Poptr1|585260  
 AT1G01920.1           Poptr1|572191  
 AT4G35020.1           Poptr1|713329,Poptr1|559854  
 AT2G44690.1           Poptr1|689541  
 AT5G62880.1,AT3G48040.1           Poptr1|687793,Poptr1|700910  
 AT1G75840.1,AT1G20090.1           Poptr1|642932  
 AT4G28950.1           Poptr1|702137  
 AT5G45970.1           Poptr1|672329,Poptr1|683158,Poptr1|705010  
 AT4G35950.1,AT2G17800.1           Poptr1|593818,Poptr1|585700  
 AT3G51300.1  
     Poptr1|721702  
     Poptr1|597230  
 AT1G35620.1           Poptr1|738832,Poptr1|592253  
 AT5G58575.1           Poptr1|641504,Poptr1|649823  
 AT5G22010.1           Poptr1|63830  
     Poptr1|691231  
 AT3G24630.1           Poptr1|578477  
 AT5G42710.1           Poptr1|588112,Poptr1|553351

AT1G61040.1 Poptr1|555549,Poptr1|55759  
 AT4G33030.1 Poptr1|695100  
 AT5G59440.1 Poptr1|706919  
 AT3G57520.1 Poptr1|734993  
 AT1G55740.1 Poptr1|582552  
 AT5G40390.1 Poptr1|562286,Poptr1|595025,Poptr1|594470  
 AT4G01265.1  
 AT4G01970.1  
     Poptr1|560522  
     Poptr1|575259,Poptr1|744793  
 AT1G31480.1 Poptr1|689636,Poptr1|574170  
 AT3G09850.1 Poptr1|578806,Poptr1|352282  
 AT5G24850.1 Poptr1|98466  
 AT2G47590.1 Poptr1|692299  
     Poptr1|583223  
 AT2G34260.1 Poptr1|711471,Poptr1|693901  
 AT1G65030.1 Poptr1|570352  
 AT4G04940.1 Poptr1|685766,Poptr1|99242  
 AT1G09770.1 Poptr1|738228,Poptr1|571093  
 AT5G52560.1 Poptr1|692753  
 AT3G26120.1 Poptr1|354734  
 AT1G37140.1 Poptr1|551502  
 AT1G29400.1 Poptr1|551248,Poptr1|714870  
 AT5G07290.1,AT5G61960.1 Poptr1|733777  
 AT1G67770.1  
 AT4G18120.1  
 AT2G42890.1  
     Poptr1|681223  
     Poptr1|577156  
     Poptr1|662241  
     Poptr1|640106  
     Poptr1|693280  
     Poptr1|640107,Poptr1|670015  
     Poptr1|662240  
     Poptr1|680103,Poptr1|705287  
 AT1G08190.1 Poptr1|686941,Poptr1|63849  
 AT1G56450.1 Poptr1|689020,Poptr1|561786  
 AT1G06470.1 Poptr1|704653  
 AT3G55340.1 Poptr1|567477  
 AT4G05220.1 Poptr1|544878,Poptr1|568221  
 AT1G61760.1  
 AT4G16210.1 Poptr1|566844,Poptr1|341903  
 AT4G32140.1 Poptr1|737259,Poptr1|694975  
     Poptr1|353043  
 AT5G37970.1,AT5G37990.1,AT5G38780.1,AT5G38100.1  
     Poptr1|101607,Poptr1|747207,Poptr1|597742,Poptr1|348858,Poptr1|586956,Poptr1|579741,Poptr1|34885

2

AT1G68040.1 Poptr1|597761,Poptr1|354312,Poptr1|573689  
 AT3G44870.1,AT1G66720.1,AT3G44860.1,AT1G66690.1,AT3G44840.1,AT1G66700.1  
 AT1G15125.1  
 AT4G26460.1  
     Poptr1|585318,Poptr1|597744,Poptr1|586957  
     Poptr1|581142,Poptr1|587447  
     Poptr1|573690,Poptr1|354311,Poptr1|700844  
 AT3G07080.1 Poptr1|573321  
     Poptr1|591064  
 AT1G68800.1 Poptr1|658950  
     Poptr1|574834,Poptr1|569857  
     Poptr1|580771  
 AT2G43950.1 Poptr1|718123,Poptr1|668303  
 AT1G31910.1 Poptr1|712033,Poptr1|739979  
     Poptr1|678245  
 AT3G10060.1 Poptr1|576771  
 AT3G55520.1 Poptr1|687350  
     Poptr1|563920  
 AT2G28870.1 Poptr1|560755,Poptr1|549180,Poptr1|558082  
 AT5G59360.1  
 AT2G37610.1  
 AT5G02420.1  
 AT1G08970.1,AT1G54830.1 Poptr1|570867,Poptr1|565336,Poptr1|595583,Poptr1|571576  
 AT1G56170.1 Poptr1|75959,Poptr1|558718  
 AT5G63470.1,AT3G48590.1 Poptr1|575368,Poptr1|341997  
 AT5G27910.1,AT5G50490.1  
 AT5G38140.1  
 AT5G50470.1,AT5G50480.1  
     Poptr1|350196,Poptr1|63568  
     Poptr1|555893  
     Poptr1|348870,Poptr1|553055  
 AT1G07470.1,AT1G07480.1 Poptr1|706098,Poptr1|723212  
 AT5G59230.1  
 AT5G21900.1 Poptr1|589282,Poptr1|717783  
 AT2G06030.1



AT2G06040.1  
AT1G31870.1 Poptr1|743199  
Poptr1|589962  
AT2G43210.1 Poptr1|562282  
Poptr1|594472  
Poptr1|677478,Poptr1|741417  
AT4G12790.1 Poptr1|573169  
AT5G22370.1 Poptr1|730763  
Poptr1|551778  
AT1G06720.1 Poptr1|594614  
AT5G10070.2 Poptr1|715953  
AT2G40360.1 Poptr1|681008  
Poptr1|703764  
AT5G53520.1,AT5G53510.1,AT4G27730.1 Poptr1|699564,Poptr1|569595  
AT4G10770.1 Poptr1|693352  
AT4G16370.1 Poptr1|560109,Poptr1|701223  
AT5G64410.1 Poptr1|686779  
AT1G09930.1 Poptr1|342540  
AT5G55930.1,AT4G26590.1 Poptr1|65515,Poptr1|65519  
Poptr1|693591  
Poptr1|591603,Poptr1|642182  
Poptr1|72153  
Poptr1|351124,Poptr1|575867,Poptr1|582303  
Poptr1|582305  
AT2G30910.1,AT2G31300.1 Poptr1|664588  
AT4G37130.1 Poptr1|655194  
Poptr1|559360,Poptr1|696052  
AT1G13120.1,AT4G05523.1 Poptr1|657451  
AT5G65960.1 Poptr1|684302  
Poptr1|76037  
AT5G12200.1 Poptr1|64611,Poptr1|722704  
AT2G18990.1,AT3G25580.1 Poptr1|549967  
AT5G06240.1 Poptr1|701463  
Poptr1|561462  
AT4G37190.1 Poptr1|65457  
AT3G53260.1,AT2G37040.1 Poptr1|667815,Poptr1|739482  
Poptr1|725007,Poptr1|696959  
AT5G57000.1 Poptr1|681903,Poptr1|653278  
AT1G17490.1  
AT1G72690.1  
Poptr1|648057  
AT2G17787.1,AT4G35940.1 Poptr1|550855,Poptr1|559858,Poptr1|559857  
Poptr1|557077  
AT2G43470.1 Poptr1|562205  
AT3G03320.1  
Poptr1|594557  
AT1G12520.1 Poptr1|646525  
AT1G08030.1 Poptr1|558264  
AT1G08020.1  
AT1G53520.1 Poptr1|673698  
Poptr1|642417  
AT3G53490.1 Poptr1|701496  
AT5G02720.1  
AT4G25670.1,AT4G25690.1 Poptr1|592862,Poptr1|648203  
AT5G52550.1  
AT4G25230.1,AT5G51450.1 Poptr1|581262,Poptr1|350052  
AT5G41960.1 Poptr1|693347,Poptr1|691047  
AT3G59480.1,AT2G31390.1 Poptr1|741473,Poptr1|562225  
AT1G69200.1 Poptr1|353948  
AT4G10260.1 Poptr1|97278  
AT3G54090.1 Poptr1|576906  
AT1G66430.1 Poptr1|546499  
AT5G51830.1 Poptr1|575736,Poptr1|570537  
AT1G06030.1,AT1G06020.1  
AT1G50390.1  
Poptr1|106882  
Poptr1|692132  
Poptr1|348814  
Poptr1|572153  
Poptr1|644371  
Poptr1|588252  
AT5G58740.1 Poptr1|681816  
Poptr1|557925  
AT3G52640.2 Poptr1|714210  
Poptr1|552886  
AT5G24840.1 Poptr1|674442,Poptr1|48247  
AT2G35450.1 Poptr1|712455  
AT2G41705.1 Poptr1|72431,Poptr1|347286  
AT5G67170.1 Poptr1|51851  
AT5G24260.1 Poptr1|688424,Poptr1|661521  
Poptr1|355291  
AT2G46040.1 Poptr1|63521,Poptr1|572279,Poptr1|644482,Poptr1|350252

AT4G11400.1  
AT3G59090.2 Poptr1|551235,Poptr1|559490  
AT5G09390.1 Poptr1|548796,Poptr1|712236  
AT1G26550.1 Poptr1|579151,Poptr1|656463  
AT5G19370.1 Poptr1|697464  
AT4G01000.1,AT3G06455.1 Poptr1|692359,Poptr1|700288  
AT1G51350.1 Poptr1|722931  
Poptr1|641283  
AT4G36550.1 Poptr1|593926,Poptr1|53385,Poptr1|72918  
AT3G46510.1 Poptr1|64402,Poptr1|723298  
AT4G31890.1,AT2G25130.1 Poptr1|685501  
AT1G60190.1,AT1G10560.1 Poptr1|666450,Poptr1|355869,Poptr1|672873  
AT1G49780.1,AT3G19380.1 Poptr1|581523,Poptr1|582191,Poptr1|557402  
AT1G29340.1 Poptr1|660726,Poptr1|546412  
AT4G16490.1 Poptr1|717391  
AT3G54790.1 Poptr1|52149,Poptr1|342237  
AT3G54850.1 Poptr1|563705,Poptr1|567650  
AT5G40140.1,AT3G20170.1,AT5G67340.1,AT5G18320.1,AT5G62560.1,AT5G58680.1,AT1G67530.1,AT3G01400.1,A  
T3G47820.1,AT5G18330.1,AT1G08315.1,AT1G24330.1,AT1G71020.1,AT4G12710.1,AT5G18340.1,AT1G23030.1,AT  
3G07360.1,AT5G01830.1,AT2G23140.1,AT4G21350.1,AT5G14510.1,AT5G65200.1,AT2G28830.1,AT1G27910.1,AT3  
G03440.1,AT5G42340.1  
Poptr1|64810,Poptr1|571147,Poptr1|346578,Poptr1|571146,Poptr1|573125,Poptr1|568369,Poptr1|59883,P  
optr1|60820,Poptr1|591243,Poptr1|99745,Poptr1|546367,Poptr1|100377,Poptr1|645254,Poptr1|575109,Poptr1|35467  
3,Poptr1|577153,Poptr1|564063,Poptr1|551785,Poptr1|570047,Poptr1|62889,Poptr1|561864,Poptr1|710348,Poptr1|69  
7928,Poptr1|555437,Poptr1|555059,Poptr1|714135,Poptr1|560979,Poptr1|354238,Poptr1|101775  
AT5G65920.1,AT3G49810.1 Poptr1|342567,Poptr1|644013  
AT3G18710.1,AT5G64660.1,AT5G09800.1 Poptr1|75563,Poptr1|53121  
AT1G15165.1  
Poptr1|53140,Poptr1|558420  
Poptr1|730776  
Poptr1|705100,Poptr1|72070  
Poptr1|726900  
Poptr1|658791  
Poptr1|594750  
Poptr1|556783  
Poptr1|726903  
Poptr1|559839  
Poptr1|559352,Poptr1|551342  
AT4G38520.1 Poptr1|649192,Poptr1|713388,Poptr1|690500,Poptr1|689686  
AT4G33920.1 Poptr1|557483,Poptr1|691753  
AT3G17090.1 Poptr1|686364  
AT3G12620.1 Poptr1|563814,Poptr1|724856  
AT5G06750.1 Poptr1|576256,Poptr1|561253  
AT5G66080.1,AT3G51370.1  
AT3G55050.1  
Poptr1|553937  
Poptr1|589367,Poptr1|735431  
AT5G14140.1 Poptr1|641822  
Poptr1|681590  
AT1G29700.1 Poptr1|564500  
Poptr1|566662  
AT1G13930.1,AT2G03440.1 Poptr1|564273,Poptr1|698376  
AT1G57680.1 Poptr1|672826,Poptr1|596762  
Poptr1|569632  
AT1G72050.2 Poptr1|703211  
Poptr1|738809  
AT5G23320.1,AT5G08335.1 Poptr1|75915,Poptr1|51769  
AT5G59410.1 Poptr1|558063,Poptr1|706128  
AT2G29020.1  
AT3G17340.1 Poptr1|724002  
AT5G26751.1,AT3G05840.1 Poptr1|699675,Poptr1|581623  
AT4G18710.1 Poptr1|699025,Poptr1|647851  
AT1G57870.1,AT1G09840.1 Poptr1|583502,Poptr1|703777  
AT4G00720.1 Poptr1|644407,Poptr1|663875  
AT1G06390.1,AT2G30980.1  
AT3G61160.2  
Poptr1|711412,Poptr1|731636  
AT1G26170.1 Poptr1|354064  
Poptr1|566708  
AT3G17000.1 Poptr1|564396,Poptr1|566819  
AT2G04305.1 Poptr1|550082  
Poptr1|587913  
Poptr1|722536  
AT4G35250.1 Poptr1|648859  
Poptr1|697144  
AT4G37200.1 Poptr1|696061  
AT1G29220.1 Poptr1|660760,Poptr1|647860  
AT3G26810.1,AT1G12820.1 Poptr1|703890,Poptr1|549767  
AT4G24390.1,AT5G49980.1 Poptr1|651225,Poptr1|551628  
AT2G39940.1 Poptr1|686456  
Poptr1|564730  
Poptr1|659564

AT3G56430.1,AT2G40800.1 Poptr1|704218  
AT3G57000.1 Poptr1|667309,Poptr1|560400  
AT1G53140.1 Poptr1|568892  
Poptr1|568891  
AT3G17300.1 Poptr1|47297,Poptr1|696654  
AT1G03360.1 Poptr1|555071  
Poptr1|572797  
AT1G29170.1 Poptr1|555676,Poptr1|728200  
AT4G18600.1  
AT2G34150.2  
Poptr1|555677  
AT5G41950.1 Poptr1|646818  
AT5G02120.1 Poptr1|653008  
AT2G27290.1 Poptr1|648960  
Poptr1|679907  
AT2G44510.1 Poptr1|550571  
AT5G03830.1  
Poptr1|569331  
AT1G31500.1 Poptr1|350015  
AT3G18500.1,AT1G73875.1 Poptr1|569830  
AT3G58560.1 Poptr1|701406,Poptr1|695262  
AT1G31530.1  
AT3G58580.1  
Poptr1|569831  
AT4G01810.1 Poptr1|552616,Poptr1|700360  
Poptr1|589764  
AT4G23885.1 Poptr1|646753  
AT5G24165.1 Poptr1|680058,Poptr1|661499  
Poptr1|666160  
AT2G45620.1 Poptr1|644365,Poptr1|730929  
AT5G10940.1 Poptr1|559027  
Poptr1|347445  
AT3G04680.1 Poptr1|736229  
AT5G39930.1  
AT5G39920.1  
AT4G09140.1 Poptr1|574228  
AT2G04660.1 Poptr1|686404  
Poptr1|567016  
AT3G03920.1 Poptr1|573923,Poptr1|571210  
AT5G18180.1  
AT5G12380.1 Poptr1|64649  
AT5G65020.1,AT5G10230.1 Poptr1|654779,Poptr1|650723  
AT5G10220.1,AT1G68090.1,AT1G35720.1,AT2G38750.1,AT2G38760.1  
Poptr1|580629,Poptr1|566394,Poptr1|555013,Poptr1|683560,Poptr1|569376,Poptr1|547838,Poptr1|35434  
0,Poptr1|575473,Poptr1|690876  
Poptr1|643752  
AT4G14490.1 Poptr1|564933,Poptr1|658402  
AT3G02400.1  
AT5G15750.1 Poptr1|583871,Poptr1|584628  
AT5G01310.1 Poptr1|577008  
AT1G05720.1 Poptr1|60736,Poptr1|665871  
Poptr1|574408  
AT5G50890.1 Poptr1|342327  
Poptr1|651688  
AT3G12940.1 Poptr1|661173  
AT3G52120.1 Poptr1|697489,Poptr1|706458  
AT2G40620.1 Poptr1|571661  
AT4G38900.1,AT2G21230.1 Poptr1|721834,Poptr1|713168  
AT1G43700.1 Poptr1|651545,Poptr1|342366  
AT2G12900.1,AT2G12940.1,AT2G13150.1  
AT2G21235.1  
AT2G24340.1  
Poptr1|574111  
AT5G07360.1 Poptr1|575492  
Poptr1|570389  
AT1G17360.1,AT1G72410.1 Poptr1|349668  
Poptr1|584141  
Poptr1|745852  
Poptr1|673224  
ATMG00090.1 Poptr1|102397  
Poptr1|581390  
AT3G27700.1 Poptr1|701787,Poptr1|64730  
AT5G57040.1 Poptr1|668789  
AT4G08960.1 Poptr1|551596  
Poptr1|651263  
AT5G20090.1 Poptr1|699382  
Poptr1|666624  
AT4G31770.1 Poptr1|578319  
AT5G57290.1,AT4G25890.1 Poptr1|686877  
AT5G19930.1 Poptr1|702113  
AT5G03780.1 Poptr1|550733  
AT1G01150.1

AT4G12670.1  
AT5G40280.1 Poptr1|577523  
Poptr1|592595  
AT4G35930.1 Poptr1|356853  
AT5G35460.1 Poptr1|736912,Poptr1|561026  
AT4G37300.1 Poptr1|587036  
Poptr1|697607  
AT5G45900.1 Poptr1|713847  
Poptr1|583242  
AT1G55860.1,AT1G70320.1 Poptr1|691832  
AT3G17205.1 Poptr1|345179,Poptr1|566875  
Poptr1|684446  
Poptr1|687541  
AT5G22100.1 Poptr1|548989,Poptr1|650409  
AT1G26940.1 Poptr1|657869  
AT2G20310.1,AT4G28690.1 Poptr1|553284  
AT1G71440.1 Poptr1|702519  
AT2G25605.1 Poptr1|695007  
AT1G08460.1 Poptr1|697693  
Poptr1|64185  
AT1G45110.1 Poptr1|72965  
Poptr1|346766  
AT5G47790.1 Poptr1|560078,Poptr1|582313  
AT2G34040.1,AT1G29030.1 Poptr1|99969,Poptr1|693964  
AT3G19516.1  
AT5G01960.1 Poptr1|734405,Poptr1|702822  
Poptr1|571937  
AT4G33540.1 Poptr1|567054  
Poptr1|564197  
AT3G04870.1 Poptr1|689835  
AT1G03760.1 Poptr1|594660  
Poptr1|671955  
AT1G67410.1 Poptr1|344882  
AT5G16890.1 Poptr1|738369  
AT2G35100.1 Poptr1|57742,Poptr1|346145  
AT3G45400.1 Poptr1|738592  
AT1G74680.1 Poptr1|573460  
AT5G44930.1  
Poptr1|567667  
Poptr1|680256  
Poptr1|662384  
Poptr1|664483  
AT1G02630.1 Poptr1|560596,Poptr1|736557  
Poptr1|669775  
AT4G30790.1 Poptr1|58737,Poptr1|685620  
AT5G17550.1,AT3G03490.1 Poptr1|646108,Poptr1|589861  
AT4G30870.1 Poptr1|554996  
AT5G39770.1  
AT5G20600.1 Poptr1|345685  
AT2G19880.1 Poptr1|704083,Poptr1|578540  
AT2G21860.1 Poptr1|650836  
Poptr1|562732  
AT2G47980.1 Poptr1|692175,Poptr1|572943  
AT3G19990.1 Poptr1|563393  
Poptr1|590793  
AT3G62390.1 Poptr1|552530  
AT1G60790.1 Poptr1|566048  
AT3G14850.2 Poptr1|594246,Poptr1|660821  
AT2G40320.1 Poptr1|696766  
AT5G20590.1 Poptr1|736614,Poptr1|344186  
AT3G55990.1 Poptr1|564043,Poptr1|698491  
AT2G42570.1 Poptr1|592181,Poptr1|689308  
AT5G01360.1 Poptr1|668061  
AT5G15900.1 Poptr1|693936  
AT1G73140.1 Poptr1|65591  
AT2G37720.1,AT5G64020.1 Poptr1|580999,Poptr1|562485,Poptr1|558432  
AT1G29050.1,AT2G34070.1 Poptr1|647882,Poptr1|568734  
AT5G58600.1 Poptr1|64658,Poptr1|697452  
AT5G01620.1 Poptr1|577055  
AT4G25360.1,AT5G51640.1 Poptr1|346122  
AT2G38320.1 Poptr1|58221  
AT2G30900.1 Poptr1|545851  
AT3G06080.2,AT5G19160.1 Poptr1|551191  
AT5G64470.2 Poptr1|65354  
AT3G12060.1,AT5G06700.1 Poptr1|701393,Poptr1|685644  
AT1G70230.1 Poptr1|698121,Poptr1|564772  
AT4G23790.1,AT4G11090.1 Poptr1|350328,Poptr1|700275,Poptr1|48695,Poptr1|552252  
AT5G06230.1,AT3G11570.1 Poptr1|735300  
AT1G48880.1 Poptr1|715770  
AT2G14530.1 Poptr1|697402  
AT5G49340.1 Poptr1|354056  
AT3G54260.1 Poptr1|696997

AT3G11030.1  
AT2G40150.1  
AT2G31110.1  
AT3G02440.1  
AT5G15890.1  
AT2G31120.1  
AT2G30010.1  
AT5G64480.1  
AT4G01080.1,AT1G01430.1  
Poptr1|572610,Poptr1|585723  
Poptr1|597196  
Poptr1|659453  
Poptr1|106460  
Poptr1|353692,Poptr1|567252,Poptr1|567254  
Poptr1|353694  
Poptr1|564046  
Poptr1|106330  
Poptr1|556169,Poptr1|693937,Poptr1|743670  
Poptr1|562486  
Poptr1|568771  
Poptr1|343868  
Poptr1|666927  
Poptr1|559537,Poptr1|721046  
Poptr1|108799  
Poptr1|48451  
Poptr1|574344  
Poptr1|352478  
Poptr1|551355  
AT1G21920.1,AT1G77660.1 Poptr1|692711,Poptr1|559216  
AT1G02170.1 Poptr1|59390  
AT4G17080.1,AT2G35170.1 Poptr1|551977,Poptr1|580148,Poptr1|591740  
Poptr1|588189,Poptr1|588186,Poptr1|588185,Poptr1|570400  
Poptr1|577402,Poptr1|577403,Poptr1|577401  
Poptr1|592977  
Poptr1|570398  
Poptr1|739845  
AT1G02330.1 Poptr1|700345  
AT5G59180.1 Poptr1|642386  
AT4G14660.1 Poptr1|682368,Poptr1|566143  
AT3G22900.1  
Poptr1|658420  
AT5G01225.1,AT3G09032.1 Poptr1|560887,Poptr1|576937  
AT1G07300.1 Poptr1|549087  
AT3G07140.1 Poptr1|665056  
Poptr1|553186  
Poptr1|577491  
AT3G04490.1 Poptr1|573720  
AT3G23700.1 Poptr1|572912  
AT4G19490.1 Poptr1|727341,Poptr1|65724  
AT3G23130.1 Poptr1|55084,Poptr1|564935  
AT2G37740.1 Poptr1|656132,Poptr1|351811,Poptr1|659644,Poptr1|667900  
AT2G42410.1 Poptr1|559665  
AT5G06070.1  
AT1G70630.1 Poptr1|345534,Poptr1|99754  
AT1G30010.1 Poptr1|545815  
AT5G46920.1 Poptr1|670442,Poptr1|676496  
AT5G16210.1 Poptr1|545378  
AT5G41685.1,AT1G64220.1 Poptr1|678318,Poptr1|652891  
AT1G18010.1,AT1G18000.1 Poptr1|569695  
Poptr1|597531,Poptr1|569694  
AT5G08290.1 Poptr1|654974  
Poptr1|562806  
AT2G47830.1 Poptr1|700735  
AT1G51610.1 Poptr1|660051  
AT3G20510.1,AT1G50740.1 Poptr1|699153,Poptr1|688055  
AT3G15090.1 Poptr1|691854  
AT4G13010.1 Poptr1|583026,Poptr1|549573  
Poptr1|589252  
Poptr1|549572,Poptr1|49463  
Poptr1|106183  
AT2G25530.1 Poptr1|561878  
AT3G51820.1 Poptr1|653150  
Poptr1|735891  
AT1G67680.1,AT1G67650.1 Poptr1|561538  
Poptr1|561539  
AT5G02280.1 Poptr1|47182  
AT5G22390.1 Poptr1|594964,Poptr1|556814  
AT4G34310.1 Poptr1|703101  
Poptr1|347676  
AT3G18580.1 Poptr1|699490  
AT4G28200.1 Poptr1|53325  
Poptr1|582815,Poptr1|71970

AT4G20280.1 Poptr1|48621  
AT1G20000.1  
Poptr1|554634  
AT5G60680.1,AT3G45210.1 Poptr1|723531,Poptr1|595060  
AT5G03230.1 Poptr1|576691,Poptr1|702735  
AT1G11700.1,AT1G61930.1 Poptr1|698823,Poptr1|694075  
AT4G21970.1,AT4G04630.1 Poptr1|568025,Poptr1|647553  
AT2G28400.1  
AT4G21930.1  
AT4G26950.1  
AT2G43980.1 Poptr1|577283  
Poptr1|695716  
AT2G36930.1 Poptr1|683182,Poptr1|735526  
AT3G49720.1,AT5G65810.1 Poptr1|684013,Poptr1|649736  
Poptr1|347545  
AT3G59520.1 Poptr1|654451  
Poptr1|679599  
AT5G53620.1 Poptr1|700763,Poptr1|569629  
Poptr1|576504  
AT5G12310.1,AT5G19430.1 Poptr1|641460,Poptr1|722674  
AT5G15320.1,AT3G01130.1 Poptr1|694830,Poptr1|546154,Poptr1|643001  
Poptr1|557158  
AT5G53060.1 Poptr1|574729,Poptr1|345739  
AT2G22600.1 Poptr1|563284,Poptr1|655460  
AT5G15270.1 Poptr1|58395  
AT5G64390.1,AT1G51580.1  
Poptr1|556333,Poptr1|698745,Poptr1|551726,Poptr1|562363,Poptr1|97097,Poptr1|577297  
AT5G09560.1  
Poptr1|564223,Poptr1|698404  
Poptr1|556334  
Poptr1|596560,Poptr1|545337  
Poptr1|591799  
AT5G44730.1 Poptr1|693324  
AT3G48150.1 Poptr1|570037  
AT5G23120.1 Poptr1|562823  
AT4G22745.1,AT3G63030.1 Poptr1|585556,Poptr1|99727,Poptr1|700480  
AT4G00416.1  
AT5G35330.1 Poptr1|673519,Poptr1|560687  
AT5G35338.2  
AT5G10910.1 Poptr1|559255  
AT2G40190.1 Poptr1|570235  
Poptr1|575325  
AT1G64780.1 Poptr1|665333  
AT4G28700.1 Poptr1|645545,Poptr1|349086  
Poptr1|107497,Poptr1|571129  
Poptr1|573384  
AT1G22660.1 Poptr1|592255  
AT1G28320.1 Poptr1|580931,Poptr1|555773  
AT2G26840.1 Poptr1|649892  
AT3G43900.1,AT3G43910.1  
AT1G19080.1 Poptr1|567274,Poptr1|696784  
AT4G01660.1 Poptr1|644721  
Poptr1|644720  
Poptr1|348218  
AT3G05210.1 Poptr1|703687  
AT4G25170.1 Poptr1|554165,Poptr1|703001  
AT5G61490.1  
Poptr1|703023  
AT1G11200.1 Poptr1|682694,Poptr1|545020  
AT4G21570.1  
AT4G24760.1 Poptr1|64861,Poptr1|733460,Poptr1|570183  
AT1G32190.1 Poptr1|739949  
AT3G30380.1 Poptr1|584638,Poptr1|745742  
AT5G38220.1 Poptr1|648044,Poptr1|589685  
AT4G31020.1,AT2G24320.1 Poptr1|717673,Poptr1|669629  
AT3G01690.1,AT5G14390.1  
AT1G66900.1  
Poptr1|106043  
Poptr1|349932  
Poptr1|554064  
Poptr1|55306,Poptr1|696600  
Poptr1|97124  
AT2G30330.1 Poptr1|729248  
AT4G08790.1 Poptr1|567524,Poptr1|720650  
AT3G55390.1 Poptr1|724737,Poptr1|696875  
AT3G04600.1 Poptr1|721369  
AT4G12060.1 Poptr1|581181,Poptr1|548568  
AT4G25370.1 Poptr1|356349  
ATCG01010.1 Poptr1|580208  
Poptr1|580210,Poptr1|568402  
Poptr1|574034,Poptr1|589722  
Poptr1|566740

AT4G10330.1 Poptr1|704212  
 Poptr1|591477  
 AT5G07590.1 Poptr1|640226,Poptr1|675651  
 AT4G16640.1 Poptr1|589866,Poptr1|349737,Poptr1|591685  
 AT1G70170.1,AT1G24140.1 Poptr1|570327,Poptr1|575433  
 AT2G45040.1  
 AT1G59970.1  
 Poptr1|594854  
 Poptr1|582177,Poptr1|568823,Poptr1|107078,Poptr1|562741,Poptr1|555557  
 Poptr1|748611,Poptr1|729761,Poptr1|563651,Poptr1|574184,Poptr1|665683  
 Poptr1|588034  
 Poptr1|104143,Poptr1|563650  
 AT5G66450.1,AT3G50920.1 Poptr1|593911,Poptr1|76334  
 AT3G57500.1 Poptr1|652733  
 AT1G17160.1 Poptr1|568842  
 AT4G27600.1 Poptr1|699965  
 AT5G50970.1 Poptr1|570357,Poptr1|733786  
 AT5G19920.1  
 Poptr1|570358  
 AT1G75200.1 Poptr1|553347  
 AT1G54410.1 Poptr1|571249,Poptr1|663123,Poptr1|582807,Poptr1|571250  
 AT3G28720.1 Poptr1|577591  
 Poptr1|712806  
 AT4G24490.1,AT5G41820.1 Poptr1|561627  
 AT1G74970.1 Poptr1|644182,Poptr1|740273  
 AT4G33250.1 Poptr1|739236,Poptr1|683074  
 AT5G58730.1 Poptr1|557924,Poptr1|64262  
 AT3G52730.1 Poptr1|697118,Poptr1|594840  
 AT1G18600.1 Poptr1|352665  
 AT1G74140.1,AT1G74130.1  
 AT1G42440.1 Poptr1|694900  
 Poptr1|550780  
 AT5G15390.1 Poptr1|545877  
 AT5G65000.1 Poptr1|695885,Poptr1|694311  
 AT3G09030.1 Poptr1|576939  
 AT5G41330.1 Poptr1|63525,Poptr1|350247  
 AT5G51200.1 Poptr1|702785  
 AT3G11270.1,AT5G05780.1 Poptr1|696801,Poptr1|698522  
 AT4G01310.1 Poptr1|572301,Poptr1|552122  
 AT4G22300.1 Poptr1|55735  
 Poptr1|61078  
 AT5G19180.1 Poptr1|345609  
 AT5G37530.1 Poptr1|714208  
 AT4G16440.1 Poptr1|57845,Poptr1|344022  
 AT4G04180.1 Poptr1|99350  
 AT5G58290.1 Poptr1|560313,Poptr1|734677  
 AT4G23940.1 Poptr1|63410  
 AT3G02450.1 Poptr1|556179  
 AT1G07510.1,AT2G29080.1 Poptr1|723227  
 AT5G42270.1 Poptr1|550790,Poptr1|715606  
 AT5G20000.1,AT5G19990.1 Poptr1|564750,Poptr1|55173  
 AT3G05530.1 Poptr1|570788,Poptr1|581882  
 AT1G45000.1,AT5G43010.1 Poptr1|694177,Poptr1|685410,Poptr1|697253,Poptr1|643066  
 AT5G15250.1 Poptr1|577650  
 AT1G53750.1 Poptr1|589827  
 AT2G20140.1,AT4G29040.1 Poptr1|553258,Poptr1|665101  
 AT3G16290.1 Poptr1|553755  
 AT1G06430.1,AT2G30950.1 Poptr1|572817  
 AT2G26140.1 Poptr1|344620  
 AT5G58870.1,AT3G47060.1 Poptr1|557956,Poptr1|64293  
 AT1G50250.1  
 AT1G79560.1  
 AT3G04340.1  
 AT1G09100.1  
 Poptr1|99352  
 Poptr1|99351  
 Poptr1|560312  
 Poptr1|591333  
 Poptr1|591340,Poptr1|592443  
 Poptr1|593482  
 Poptr1|701550  
 Poptr1|580440  
 Poptr1|108243  
 Poptr1|586728  
 Poptr1|561128  
 Poptr1|577919  
 Poptr1|685597  
 Poptr1|597463  
 Poptr1|577920  
 Poptr1|747188  
 Poptr1|690615  
 Poptr1|108296

Poptr1|552657  
AT1G73930.1 Poptr1|700815,Poptr1|661777  
AT2G32330.1,AT2G31580.1 Poptr1|552840  
AT2G32320.1  
AT2G29630.1 Poptr1|549090  
Poptr1|723102  
AT1G78890.1,AT1G16840.1 Poptr1|697036  
AT2G19180.1 Poptr1|579038  
AT1G45010.1,AT1G35180.1,AT1G35170.1 Poptr1|72957  
AT4G02220.1 Poptr1|684269  
AT1G04230.1,AT5G43720.1 Poptr1|726445,Poptr1|657234  
AT3G03890.1 Poptr1|699886,Poptr1|738466  
AT1G50575.1 Poptr1|354704  
Poptr1|597594  
AT2G36080.1 Poptr1|576548,Poptr1|653695  
AT1G68840.1,AT1G25560.1 Poptr1|696583,Poptr1|566667  
AT3G61970.1,AT2G46870.1 Poptr1|572480,Poptr1|569247,Poptr1|342858,Poptr1|65803  
AT1G50680.1,AT1G51120.1 Poptr1|555275  
AT3G11580.1,AT5G06250.1  
AT1G13260.1,AT3G25730.1  
AT4G01500.1,AT1G01030.1  
Poptr1|352315,Poptr1|578763  
AT3G11240.1,AT5G05700.1 Poptr1|564003,Poptr1|567284  
AT3G21820.1 Poptr1|741339  
AT3G05810.1 Poptr1|662591,Poptr1|704365  
AT5G26800.1  
AT1G78110.1,AT1G22230.1 Poptr1|643745,Poptr1|559121,Poptr1|663764  
AT4G07950.1,AT1G01210.1 Poptr1|569559  
AT5G63460.1 Poptr1|570248,Poptr1|666655  
AT3G07400.1 Poptr1|553234  
Poptr1|645482  
AT5G08410.1,AT5G23440.1 Poptr1|563410,Poptr1|725186  
AT3G57930.1,AT2G42190.1 Poptr1|547911  
AT2G17070.1,AT4G35210.1,AT4G35200.1,AT2G17080.1  
Poptr1|557005,Poptr1|556712,Poptr1|54348,Poptr1|556714,Poptr1|546309,Poptr1|556711,Poptr1|557004  
AT4G35720.1 Poptr1|593759,Poptr1|593758,Poptr1|349887,Poptr1|71916,Poptr1|558802,Poptr1|71915  
AT1G76210.1,AT1G20520.1 Poptr1|346606,Poptr1|559919  
AT2G17680.1,AT4G35690.1,AT4G35710.1  
AT4G35660.1  
AT3G51400.1  
AT3G51410.1  
Poptr1|346604,Poptr1|559921,Poptr1|346602,Poptr1|346601,Poptr1|559922,Poptr1|107050  
Poptr1|546308  
AT5G18790.1,AT3G06320.1 Poptr1|657961  
Poptr1|579427  
AT3G01740.1,AT5G14290.1 Poptr1|549644  
AT2G38480.1 Poptr1|734245  
Poptr1|560960  
AT5G01400.1 Poptr1|576974  
AT1G27595.1  
AT5G08420.1 Poptr1|719150  
AT1G24520.1,AT3G26110.1 Poptr1|354725,Poptr1|666640,Poptr1|356033  
AT3G02370.1,AT3G57360.1 Poptr1|592849  
AT5G18580.1 Poptr1|60581,Poptr1|54955  
AT1G43860.1 Poptr1|643536,Poptr1|714642  
AT1G56250.1,AT1G56240.1,AT1G09155.1 Poptr1|103459,Poptr1|570754  
AT2G02310.1,AT2G02360.1,AT2G02250.1,AT2G02230.1,AT2G02340.1,AT2G02240.1  
Poptr1|737413,Poptr1|353047,Poptr1|717865  
AT2G02320.1  
AT1G80110.1  
Poptr1|570755  
Poptr1|581917  
Poptr1|97793  
Poptr1|690911,Poptr1|547964  
Poptr1|578313  
AT1G64405.1 Poptr1|579064,Poptr1|554489,Poptr1|63424  
AT2G25840.2 Poptr1|554641  
AT4G14147.1 Poptr1|597053  
AT1G09450.1 Poptr1|581606,Poptr1|570666  
AT1G09980.1,AT1G58350.1 Poptr1|689628,Poptr1|574220  
AT3G61190.1,AT2G45760.1 Poptr1|572200,Poptr1|552128  
Poptr1|548501  
AT1G77710.1 Poptr1|643659,Poptr1|716609  
Poptr1|673337  
AT1G06220.1,AT5G25230.1 Poptr1|695243  
AT3G22980.1 Poptr1|54302,Poptr1|556915  
AT1G56070.1 Poptr1|558749,Poptr1|562883,Poptr1|562884  
Poptr1|669672  
Poptr1|354334  
Poptr1|581305  
Poptr1|348142,Poptr1|748394  
AT3G21580.2 Poptr1|657638



Poptr1|678941  
AT4G38750.1 Poptr1|649263  
Poptr1|721795  
Poptr1|106048,Poptr1|546187  
AT3G11470.1 Poptr1|735377  
Poptr1|653725  
Poptr1|653724  
AT5G21920.1 Poptr1|717001  
AT5G03345.1 Poptr1|701527,Poptr1|589466  
AT4G05070.1 Poptr1|574585,Poptr1|568311,Poptr1|571808,Poptr1|555484  
AT3G19170.1,AT1G49630.1 Poptr1|581499  
AT2G32760.1 Poptr1|701769  
AT5G55490.1 Poptr1|552875  
AT1G05120.1 Poptr1|664745  
AT1G61140.1,AT1G11100.1 Poptr1|568265,Poptr1|713719  
AT5G43530.1 Poptr1|580162  
AT1G02670.1  
Poptr1|700564  
Poptr1|566114  
AT4G30770.1 Poptr1|558442,Poptr1|562495  
AT5G07330.1 Poptr1|699331,Poptr1|575489  
AT1G63060.1 Poptr1|554667  
Poptr1|570385  
AT5G46390.2 Poptr1|568463  
AT5G08740.1 Poptr1|562537  
AT3G25070.1 Poptr1|711575  
AT5G20070.1 Poptr1|653335,Poptr1|98341  
AT5G48545.1 Poptr1|684143  
Poptr1|105545  
AT4G30630.1 Poptr1|561345,Poptr1|578729  
AT5G57910.1  
AT3G24315.1 Poptr1|725955  
AT1G80480.1,AT1G15730.1 Poptr1|60156  
AT1G26520.1 Poptr1|656501  
Poptr1|594127  
Poptr1|590092  
Poptr1|584405  
Poptr1|590093  
Poptr1|659226  
AT1G49980.1 Poptr1|550009  
Poptr1|550008  
AT1G16340.1,AT1G79500.1 Poptr1|551267,Poptr1|694651  
ATCG00280.1 Poptr1|101980  
Poptr1|570093,Poptr1|675040  
Poptr1|586603  
Poptr1|673180  
Poptr1|573292  
AT2G04700.1 Poptr1|641561  
AT4G22190.1 Poptr1|568095,Poptr1|679725,Poptr1|102325,Poptr1|584725  
AT1G63610.2 Poptr1|694899,Poptr1|693022  
AT5G39600.1 Poptr1|570348,Poptr1|356141,Poptr1|105935,Poptr1|683300  
AT4G33790.1 Poptr1|649125,Poptr1|546333  
AT3G44540.1,AT5G22500.1 Poptr1|741608,Poptr1|574194,Poptr1|54335  
AT5G22420.1  
AT3G44550.1,AT3G44560.1  
Poptr1|582647,Poptr1|593665  
Poptr1|597282  
AT4G03240.1 Poptr1|571833  
AT4G22860.1,AT4G11990.1 Poptr1|646516,Poptr1|63648  
Poptr1|356344  
AT1G06660.1,AT2G30820.1 Poptr1|559510,Poptr1|347025  
AT1G68820.1 Poptr1|345238  
Poptr1|658947  
AT1G34355.1 Poptr1|703192  
AT2G34110.1  
AT5G65650.1 Poptr1|703422,Poptr1|719471  
AT4G36660.1  
AT1G19380.1  
AT1G61790.1 Poptr1|568205  
AT1G11560.1  
AT5G61970.1 Poptr1|570343,Poptr1|701061  
AT3G11220.1 Poptr1|724479  
Poptr1|564016  
AT3G44220.1,AT5G22200.1 Poptr1|558191  
AT3G11660.1 Poptr1|735260  
AT5G53730.1 Poptr1|666026,Poptr1|661635  
AT4G01410.1 Poptr1|572469,Poptr1|552356  
AT2G27270.1  
AT5G05657.1,AT5G06330.1  
AT2G35960.1,AT2G35970.1,AT4G09590.1,AT3G52470.1  
Poptr1|695193  
AT1G04590.2 Poptr1|576848,Poptr1|560825

AT5G46020.1 Poptr1|647916,Poptr1|586068  
Poptr1|550271  
ATCG00640.1 Poptr1|590286,Poptr1|585965,Poptr1|693754  
Poptr1|61680  
AT1G48420.1 Poptr1|569406  
Poptr1|580650  
AT3G26115.2 Poptr1|565966  
AT1G59520.1 Poptr1|700118  
Poptr1|347562  
AT4G28190.1 Poptr1|682871,Poptr1|48158  
AT2G20825.1  
AT1G73940.1 Poptr1|550493  
AT5G49410.1 Poptr1|356934  
AT1G67630.1 Poptr1|697939  
Poptr1|657403  
Poptr1|565073  
AT5G63260.1,AT3G48440.1 Poptr1|570198  
AT3G02830.1 Poptr1|742734,Poptr1|574054  
AT1G04990.1,AT2G32930.1 Poptr1|732336,Poptr1|552730  
AT3G12680.1 Poptr1|724287  
AT1G48195.1  
AT5G16540.1  
AT1G29600.1  
Poptr1|733505  
Poptr1|656369  
AT5G19910.1 Poptr1|588177,Poptr1|575508  
AT3G09090.1 Poptr1|735720  
Poptr1|560873  
AT1G17040.1,AT1G78540.1 Poptr1|65633,Poptr1|99463  
AT1G03330.1 Poptr1|645626,Poptr1|704846  
AT5G14105.1 Poptr1|641832  
AT2G45270.1 Poptr1|572089  
AT5G64250.2 Poptr1|736065  
Poptr1|65118  
AT1G17850.1 Poptr1|96970  
AT5G66770.1 Poptr1|53374,Poptr1|593942  
AT1G55580.1 Poptr1|49523,Poptr1|569603,Poptr1|574701  
AT2G37650.1 Poptr1|344252  
AT4G37650.1 Poptr1|586010  
AT1G21450.1 Poptr1|714639,Poptr1|551373  
AT5G52510.1 Poptr1|714252,Poptr1|592851  
AT3G13840.1 Poptr1|349450,Poptr1|63663  
AT1G14920.1,AT2G01570.1 Poptr1|726855,Poptr1|719856  
AT3G54220.1 Poptr1|676191  
AT1G07530.1 Poptr1|549156,Poptr1|723239  
AT5G41920.1 Poptr1|344030,Poptr1|575997  
AT4G08250.1 Poptr1|551479,Poptr1|552883,Poptr1|559213  
AT1G50600.1 Poptr1|49380  
AT3G49950.1 Poptr1|553952,Poptr1|558929  
AT1G63100.1 Poptr1|646568,Poptr1|640539  
AT3G50650.1  
AT2G29060.1  
AT5G48150.1  
AT2G04890.1  
AT5G67411.1  
Poptr1|720118  
Poptr1|562206,Poptr1|594555  
Poptr1|645273,Poptr1|545432  
Poptr1|64992  
Poptr1|346824,Poptr1|72910  
Poptr1|734437  
Poptr1|558056,Poptr1|549155  
Poptr1|650248,Poptr1|549153,Poptr1|558054,Poptr1|641177  
Poptr1|567409  
Poptr1|549154,Poptr1|558055  
Poptr1|575349  
Poptr1|559357,Poptr1|586823,Poptr1|100269,Poptr1|102789  
Poptr1|652427,Poptr1|575909  
Poptr1|569054  
Poptr1|594419,Poptr1|562334  
AT3G05740.1 Poptr1|60623  
AT1G31360.1 Poptr1|343525  
AT1G10930.1 Poptr1|553405  
AT4G35740.1 Poptr1|593782  
AT1G60930.1  
Poptr1|700101  
Poptr1|553407  
Poptr1|593781  
AT5G64930.1 Poptr1|558613,Poptr1|558612,Poptr1|654864  
Poptr1|654863  
AT5G22110.1 Poptr1|569402  
AT5G59350.1 Poptr1|558090,Poptr1|656081,Poptr1|549186,Poptr1|675626

AT2G39560.1  
AT1G72030.1 Poptr1|742007  
Poptr1|571051  
AT3G13235.1 Poptr1|550640,Poptr1|582557  
Poptr1|582553  
AT2G21385.1 Poptr1|556523  
Poptr1|557193  
AT1G17330.1 Poptr1|686027  
Poptr1|585406  
AT5G05930.1 Poptr1|563960  
Poptr1|567340  
AT3G18630.1 Poptr1|567050  
AT2G10550.1  
AT5G42080.1 Poptr1|712095,Poptr1|691073  
AT3G60190.1 Poptr1|684392,Poptr1|740219  
AT3G61760.1 Poptr1|342804  
AT1G14830.1 Poptr1|698155  
AT2G44590.3  
Poptr1|589958  
AT2G46490.1,AT5G35110.1 Poptr1|561281,Poptr1|578807  
Poptr1|561280,Poptr1|578809  
AT4G32770.1 Poptr1|578086  
Poptr1|561762  
AT5G13420.1 Poptr1|646955,Poptr1|640120  
Poptr1|670245  
AT2G07689.1,ATMG01320.1,ATMG00285.1 Poptr1|584983  
Poptr1|579208  
Poptr1|579209  
Poptr1|584982  
AT1G15390.1 Poptr1|640630  
AT5G37850.1 Poptr1|348791  
Poptr1|555960  
Poptr1|555963  
AT3G18050.1 Poptr1|574981,Poptr1|661700  
AT4G28100.1 Poptr1|729171  
Poptr1|739104  
AT5G61340.1 Poptr1|581393,Poptr1|569962  
Poptr1|556144  
AT2G43760.1 Poptr1|706483  
AT1G66200.1,AT5G37600.1 Poptr1|569354,Poptr1|580657,Poptr1|710427  
AT5G35630.1 Poptr1|725770,Poptr1|565302  
AT1G48470.1,AT3G17820.1  
Poptr1|552975,Poptr1|648144,Poptr1|593526,Poptr1|562842,Poptr1|685196  
Poptr1|645159  
Poptr1|552977,Poptr1|552970  
Poptr1|748409  
Poptr1|565673  
Poptr1|565674  
AT1G60430.1 Poptr1|578872,Poptr1|672979  
AT1G53490.1 Poptr1|584875,Poptr1|589793  
AT5G51720.1 Poptr1|701148,Poptr1|662427  
AT3G56510.1 Poptr1|706840  
AT3G60210.1 Poptr1|683218  
AT2G44650.1  
Poptr1|644213  
AT5G14910.1 Poptr1|691545  
AT4G38020.1 Poptr1|72120  
AT3G60070.1 Poptr1|583307,Poptr1|54777  
AT2G44280.1  
AT1G53345.1 Poptr1|580614  
AT5G09580.1 Poptr1|65364  
AT2G23150.1 Poptr1|587054,Poptr1|587050  
AT1G47240.1 Poptr1|347612  
AT1G80830.1,AT1G15960.1 Poptr1|100440  
AT5G67330.1  
AT4G18790.1  
Poptr1|72489,Poptr1|559270  
Poptr1|559268  
Poptr1|587216  
AT1G32690.1,AT2G35200.1 Poptr1|590017,Poptr1|580066  
AT1G09150.1 Poptr1|570763,Poptr1|744562  
AT5G49710.3,AT4G24590.1 Poptr1|651212,Poptr1|692623  
AT1G67700.2 Poptr1|682556  
Poptr1|589934  
AT1G42550.1 Poptr1|346544,Poptr1|52281  
AT5G19050.1 Poptr1|565324  
AT5G16550.1 Poptr1|693860  
AT2G42120.1 Poptr1|576259,Poptr1|352251  
AT5G13190.1 Poptr1|690963,Poptr1|684797  
AT5G59845.1,AT2G39540.1 Poptr1|649651,Poptr1|549969,Poptr1|689595  
AT1G75750.1 Poptr1|642965,Poptr1|346697,Poptr1|652064,Poptr1|715453  
AT1G22690.1 Poptr1|574284

AT3G02885.1 Poptr1|553013  
AT4G09600.1,AT4G09610.1 Poptr1|592232  
AT5G15230.1 Poptr1|577634  
AT2G14900.1  
AT1G74670.1  
Poptr1|550887  
Poptr1|652062  
Poptr1|48955  
Poptr1|682778  
AT2G25280.1 Poptr1|702038,Poptr1|654187  
AT4G10760.1 Poptr1|63366  
AT1G06240.1 Poptr1|574350  
Poptr1|579124  
AT2G44850.1 Poptr1|551953  
Poptr1|591787  
AT3G60150.1,AT2G44525.1 Poptr1|732663  
AT4G18230.1 Poptr1|691538  
Poptr1|348076  
AT1G62850.1 Poptr1|646490,Poptr1|671184  
AT1G62855.1  
AT5G62030.1 Poptr1|665523  
Poptr1|571414  
AT4G32910.1 Poptr1|689012  
Poptr1|561746  
AT4G11600.1 Poptr1|709364,Poptr1|350213  
AT2G31570.1 Poptr1|685932  
AT3G63080.1,AT2G48150.1 Poptr1|731984  
AT1G63460.1 Poptr1|548472  
AT2G25080.1,AT4G31870.1  
AT2G43350.1  
Poptr1|679037  
Poptr1|587397  
AT3G05040.1 Poptr1|699802  
AT4G39820.1 Poptr1|558569  
AT2G18290.1 Poptr1|53386,Poptr1|356966  
AT5G19940.1 Poptr1|745322  
AT2G41150.2,AT3G56750.1 Poptr1|576160,Poptr1|560398  
AT5G07630.1 Poptr1|590163  
AT1G79140.1 Poptr1|650939  
AT4G02620.1 Poptr1|682175  
AT4G02940.1 Poptr1|572798  
AT2G48080.1  
Poptr1|584994,Poptr1|584989  
Poptr1|584991  
AT1G26340.1 Poptr1|659196  
AT1G60660.1 Poptr1|669396  
AT2G32720.1 Poptr1|691705,Poptr1|683057  
AT5G53560.1  
AT2G46650.1  
Poptr1|692079  
AT3G54350.1 Poptr1|342196  
Poptr1|72988  
AT1G67420.1 Poptr1|565037  
Poptr1|658128  
Poptr1|657359  
AT4G21090.1,AT4G05450.1 Poptr1|705111,Poptr1|647169  
AT4G38090.1 Poptr1|563305  
AT3G58140.1 Poptr1|689626  
Poptr1|103337  
AT4G39280.1 Poptr1|686705  
Poptr1|546063  
AT5G06310.1 Poptr1|355481  
AT2G04395.1,AT2G05210.1  
AT4G14615.1,AT1G52825.1 Poptr1|682567,Poptr1|564906  
AT5G42920.2 Poptr1|703123  
AT1G45233.2  
Poptr1|551848  
AT4G15520.1 Poptr1|686172  
AT1G33490.1,AT4G10140.1 Poptr1|646002,Poptr1|730426  
AT1G67910.1 Poptr1|720351,Poptr1|726220  
AT3G13227.1,AT5G55980.1  
Poptr1|669299  
AT5G26880.1 Poptr1|686815  
AT1G43690.1 Poptr1|694621,Poptr1|684539  
AT1G76200.1 Poptr1|642843  
Poptr1|670703  
AT2G45730.1 Poptr1|342171,Poptr1|559822  
AT3G60890.1,AT2G45450.1 Poptr1|572123,Poptr1|347877  
Poptr1|554264,Poptr1|548562  
AT2G01120.1 Poptr1|354217,Poptr1|566544  
AT4G37760.1,AT2G22830.1 Poptr1|696192,Poptr1|709884,Poptr1|694459  
AT5G24155.1,AT5G24150.1,AT5G24160.1,AT5G24140.1

AT1G58440.1  
Poptr1|588349,Poptr1|592142  
Poptr1|101971  
Poptr1|593249,Poptr1|586759  
Poptr1|100766,Poptr1|587948,Poptr1|587941,Poptr1|596526  
Poptr1|597255  
Poptr1|586758,Poptr1|596525  
Poptr1|579173,Poptr1|586760  
Poptr1|573668  
Poptr1|590705,Poptr1|675236  
AT5G41010.1 Poptr1|661185  
AT1G53690.1  
AT1G08640.1 Poptr1|738223,Poptr1|571092  
AT1G49380.1 Poptr1|722115  
Poptr1|546020  
AT5G11960.1 Poptr1|352654,Poptr1|61300  
AT2G34090.2 Poptr1|568731  
AT3G21110.1 Poptr1|577382  
Poptr1|109203  
AT2G05310.1,AT4G13500.1 Poptr1|664885  
AT1G28100.3 Poptr1|554701,Poptr1|63197  
AT3G20320.1 Poptr1|53071  
AT1G12570.1 Poptr1|548528  
AT1G72970.1 Poptr1|703910,Poptr1|59606  
AT1G73050.1 Poptr1|563477  
AT1G14190.1,AT1G14185.1 Poptr1|567036,Poptr1|353849,Poptr1|567035  
AT5G51950.1,AT3G56060.1,AT5G51930.1  
Poptr1|356296  
Poptr1|105685  
Poptr1|596582,Poptr1|592098  
Poptr1|567819,Poptr1|584070  
Poptr1|597512  
AT2G15270.1 Poptr1|549947  
AT1G21930.1,AT3G42150.1 Poptr1|643649  
Poptr1|559209  
AT3G45740.1 Poptr1|563801,Poptr1|567538  
AT3G04460.1 Poptr1|571109  
Poptr1|586901  
AT2G36220.1,AT3G52710.1 Poptr1|561501,Poptr1|576593  
AT1G01910.1 Poptr1|731009,Poptr1|692422  
AT5G11870.1 Poptr1|717943  
AT1G71190.1 Poptr1|63863  
AT4G29960.1 Poptr1|58820,Poptr1|344199  
AT1G52780.1 Poptr1|640659  
Poptr1|352308  
AT4G10050.1 Poptr1|689635,Poptr1|574176  
AT2G31305.1 Poptr1|562507,Poptr1|558452  
AT3G48470.1 Poptr1|666601  
AT1G78010.1 Poptr1|551541  
AT5G65220.1 Poptr1|718770  
Poptr1|558527  
AT5G62950.1,AT3G28956.1 Poptr1|558454  
ATMG00900.1,AT2G07681.1,AT2G07771.2 Poptr1|102519,Poptr1|102096  
AT5G53670.1 Poptr1|99477,Poptr1|568636  
Poptr1|349155  
AT4G25080.1 Poptr1|728824  
Poptr1|666765  
Poptr1|666764  
AT4G11860.1 Poptr1|350151,Poptr1|691171  
AT4G22960.1  
AT5G57280.1 Poptr1|701933,Poptr1|683931  
AT4G36630.2 Poptr1|686085,Poptr1|703414  
AT3G26580.1 Poptr1|663461  
AT1G29040.1 Poptr1|728220  
AT3G27890.1 Poptr1|690866,Poptr1|555056  
Poptr1|350879  
AT3G49000.1 Poptr1|575829  
Poptr1|575830  
AT1G03150.1 Poptr1|651769  
Poptr1|643298  
AT3G06960.1 Poptr1|697784  
AT2G44640.1 Poptr1|591807  
AT2G31410.1 Poptr1|553105,Poptr1|572880  
AT5G51540.1 Poptr1|575681  
Poptr1|575680  
AT1G48850.1 Poptr1|724973,Poptr1|655918  
AT2G21150.1 Poptr1|648739,Poptr1|697212  
AT5G06440.3,AT3G11720.1 Poptr1|576467  
AT5G24350.1 Poptr1|57457,Poptr1|355339  
AT4G26320.1,AT5G56540.1 Poptr1|573930,Poptr1|547592,Poptr1|341682  
AT1G55330.1,AT3G13520.1  
AT1G16570.1 Poptr1|583054

AT2G42760.1 Poptr1|555648,Poptr1|568678  
Poptr1|675990  
AT5G14250.1 Poptr1|688908,Poptr1|64917  
AT1G49140.1,AT3G18410.1 Poptr1|661749,Poptr1|680876  
AT3G07180.1 Poptr1|692067  
Poptr1|105775  
AT4G02530.1 Poptr1|669769,Poptr1|560592  
AT1G31860.1 Poptr1|745221  
AT1G26640.1 Poptr1|659252  
AT1G02410.1 Poptr1|48633  
Poptr1|590740  
AT3G51100.1 Poptr1|679180,Poptr1|655407  
AT5G18150.1 Poptr1|571208  
AT5G58375.1 Poptr1|571890,Poptr1|574499  
AT1G76460.1,AT1G20880.1 Poptr1|550726,Poptr1|652263  
AT3G54770.1 Poptr1|655968,Poptr1|659812  
AT1G33470.1 Poptr1|663427,Poptr1|671061  
AT2G46780.1 Poptr1|552349,Poptr1|572461  
AT1G78260.1,AT1G22330.1  
AT1G22910.3  
AT3G06970.1  
Poptr1|107116  
Poptr1|355358  
Poptr1|574666  
AT2G36740.1 Poptr1|704435  
Poptr1|582040  
AT5G13390.1 Poptr1|48606,Poptr1|554672  
AT3G09735.1 Poptr1|576667,Poptr1|589410  
AT2G37120.1,AT3G53370.1  
AT5G25080.1 Poptr1|654245,Poptr1|669168  
AT2G41620.1,AT3G57350.1 Poptr1|687663,Poptr1|580574  
AT1G52510.1 Poptr1|60155  
AT3G53270.1 Poptr1|589061,Poptr1|560574  
Poptr1|596165,Poptr1|584801  
AT4G29110.1 Poptr1|593226,Poptr1|702151  
AT3G16330.1,AT1G52140.1  
AT5G59140.1 Poptr1|558014  
AT1G30540.1 Poptr1|684099,Poptr1|582573  
Poptr1|572858  
AT1G78600.1 Poptr1|699052  
AT1G75540.1 Poptr1|52191,Poptr1|550941  
AT2G21320.1,AT4G38960.1 Poptr1|648693,Poptr1|563254,Poptr1|697232,Poptr1|741174  
AT2G31380.1,AT1G06040.1 Poptr1|718322,Poptr1|703465  
AT4G10240.1  
AT2G39910.1 Poptr1|696812  
AT5G04540.1 Poptr1|353301,Poptr1|55637  
AT3G10550.1  
AT3G48540.1 Poptr1|575360,Poptr1|570257  
AT1G78190.1,AT1G22270.1 Poptr1|559108,Poptr1|342480  
AT1G01760.1 Poptr1|731067  
AT2G34980.1 Poptr1|356443,Poptr1|343399  
AT3G12150.1 Poptr1|745588  
Poptr1|667402  
AT5G09830.1 Poptr1|641965  
AT4G12590.1 Poptr1|667136,Poptr1|560160  
AT5G54600.1 Poptr1|730292  
AT2G23360.1 Poptr1|719246,Poptr1|651092  
AT3G05270.1 Poptr1|75675,Poptr1|72462,Poptr1|551453,Poptr1|558480  
AT1G19835.1 Poptr1|715396,Poptr1|550906  
AT1G77580.2,AT1G21810.1  
AT4G36120.1  
AT2G24470.1  
AT1G47900.1  
Poptr1|557408  
AT5G44650.1 Poptr1|548166  
Poptr1|554628  
AT2G14660.1 Poptr1|649704  
AT3G52770.1 Poptr1|560740  
Poptr1|567947  
AT3G12870.1 Poptr1|650934  
AT5G56120.1 Poptr1|642694,Poptr1|672146  
AT4G31130.1 Poptr1|704660,Poptr1|688965  
Poptr1|563372  
AT1G02910.1 Poptr1|710226  
AT3G05760.1 Poptr1|729449  
AT3G60740.1 Poptr1|688117  
Poptr1|585814  
AT5G12320.1 Poptr1|697457,Poptr1|641461  
AT2G17390.1,AT4G35450.1 Poptr1|595047,Poptr1|741910  
Poptr1|595049  
AT5G56740.1 Poptr1|663183  
Poptr1|571299

AT5G23290.1 Poptr1|558668,Poptr1|695956  
AT4G16566.1 Poptr1|349728  
Poptr1|673888  
AT3G58730.1 Poptr1|549686  
AT5G35430.1 Poptr1|351575,Poptr1|702295  
Poptr1|591556  
AT5G58005.1 Poptr1|738024,Poptr1|653557  
AT4G28660.1 Poptr1|349103  
AT1G77620.1 Poptr1|347263,Poptr1|716643  
AT1G21640.1 Poptr1|347211,Poptr1|714589  
AT4G06534.1 Poptr1|347635,Poptr1|59475  
AT4G06536.1  
AT5G35200.1 Poptr1|560566  
AT4G40080.1 Poptr1|559046  
AT1G33340.1 Poptr1|581062  
AT1G14910.1,AT2G01600.1 Poptr1|720939  
AT4G25940.1,AT5G57200.1 Poptr1|579037,Poptr1|560668  
Poptr1|669736  
Poptr1|669737  
Poptr1|658750  
Poptr1|640808,Poptr1|675317  
AT1G55300.2 Poptr1|639652,Poptr1|555214  
AT5G64180.1 Poptr1|661585,Poptr1|732770  
Poptr1|574667  
Poptr1|670184  
AT1G73970.1 Poptr1|563534  
Poptr1|563535  
Poptr1|567879  
AT3G15190.1 Poptr1|579426  
AT4G22320.1 Poptr1|698849,Poptr1|673634  
Poptr1|691791  
AT1G31600.1 Poptr1|350018  
AT2G20930.1 Poptr1|697173  
Poptr1|713372  
AT1G53000.1 Poptr1|55964,Poptr1|579474  
AT5G10320.1 Poptr1|685166  
AT3G04710.1 Poptr1|595410,Poptr1|699844  
AT1G18640.1 Poptr1|569934  
AT4G17650.1 Poptr1|692528  
AT2G16760.1,AT2G47370.1 Poptr1|572611  
AT5G28660.1  
AT2G01410.1 Poptr1|589611,Poptr1|676402  
AT2G06010.1 Poptr1|589284,Poptr1|60753  
Poptr1|596279  
AT3G09310.1 Poptr1|667880  
AT3G63190.1 Poptr1|710069  
AT4G18540.1 Poptr1|545207,Poptr1|568738  
Poptr1|545206,Poptr1|108346  
AT3G20920.1 Poptr1|706273,Poptr1|697548  
AT3G42100.1,AT3G30420.1,AT1G35940.1,AT3G30560.1,AT3G13250.1,AT2G05080.1,AT3G31980.1,AT5G37110.1  
Poptr1|61658,Poptr1|565338,Poptr1|55755  
AT3G51700.1,AT4G03916.1,AT1G52960.1,AT3G51690.1  
AT5G32070.1  
AT1G64410.1,AT3G42340.1  
AT1G54430.1  
AT3G43350.1,AT4G03690.1  
AT5G28780.1  
Poptr1|99203,Poptr1|571335,Poptr1|64146,Poptr1|577991,Poptr1|568242,Poptr1|102676  
Poptr1|109220,Poptr1|64553,Poptr1|579273,Poptr1|98394,Poptr1|597640  
Poptr1|595865  
Poptr1|646195  
Poptr1|577995,Poptr1|587599  
Poptr1|583069  
AT3G20475.1 Poptr1|568546  
AT4G25540.1 Poptr1|575808  
AT3G24495.1 Poptr1|584023  
AT4G02070.1 Poptr1|572625  
Poptr1|568545  
Poptr1|584022  
Poptr1|664360,Poptr1|354821  
Poptr1|591251,Poptr1|108234,Poptr1|103062  
Poptr1|597213  
AT1G08780.1 Poptr1|595413,Poptr1|699843  
AT2G35736.1 Poptr1|671244  
Poptr1|48189  
AT1G35220.1 Poptr1|551612  
Poptr1|551613  
AT4G22930.1 Poptr1|53049  
Poptr1|577626  
ATMG00160.1 Poptr1|747176  
AT2G07695.1,ATMG01280.1  
AT5G52970.1 Poptr1|576713

Poptr1|574866  
AT3G59670.1 Poptr1|582751  
AT3G50040.1  
Poptr1|574407  
AT1G14300.1 Poptr1|665838,Poptr1|582778  
AT3G25470.1 Poptr1|573182  
AT4G13700.1 Poptr1|554821  
AT3G20500.1 Poptr1|688056  
AT5G25480.1 Poptr1|561861  
AT3G50685.1 Poptr1|719476  
Poptr1|566944  
AT2G33450.1 Poptr1|564970  
Poptr1|725884  
AT2G26970.1 Poptr1|357155  
AT1G52590.1 Poptr1|596066  
AT5G41850.1 Poptr1|709188  
Poptr1|584863  
AT1G09870.1 Poptr1|686434,Poptr1|724400  
AT3G08010.1 Poptr1|54653,Poptr1|557786  
AT3G61460.1 Poptr1|644490,Poptr1|572290  
AT5G40250.1 Poptr1|577508,Poptr1|64732  
AT1G72220.1 Poptr1|643829  
AT2G18650.1,AT4G30400.1 Poptr1|578665,Poptr1|561397  
AT1G23980.1  
AT5G57750.1  
Poptr1|575132,Poptr1|570067  
AT5G13240.1 Poptr1|687170  
AT3G03070.1 Poptr1|681203  
AT5G63670.1,AT5G08565.1 Poptr1|563413,Poptr1|660008  
AT1G16020.1,AT1G80910.1 Poptr1|696489  
Poptr1|566419  
Poptr1|566418  
AT3G24200.2 Poptr1|690916  
Poptr1|675719  
AT5G55960.1 Poptr1|65523  
AT1G02100.1 Poptr1|591778  
Poptr1|591777  
AT5G05310.3 Poptr1|665384  
Poptr1|676328  
Poptr1|738343  
AT1G69480.1 Poptr1|345128  
AT1G14040.1,AT2G03260.1,AT2G03240.1 Poptr1|55395,Poptr1|353879  
AT3G23430.1 Poptr1|54969,Poptr1|354601  
AT1G68740.1 Poptr1|345219,Poptr1|55292  
AT3G29060.1 Poptr1|577675  
AT1G35350.1,AT1G26730.1,AT4G25350.1  
AT2G03250.1  
Poptr1|586623,Poptr1|596362  
Poptr1|587131  
Poptr1|576129  
Poptr1|107728  
Poptr1|560352  
Poptr1|597349  
Poptr1|597350  
Poptr1|591317  
Poptr1|595347  
AT1G55325.1 Poptr1|555194,Poptr1|547594  
Poptr1|555195  
AT4G32820.1 Poptr1|577909  
Poptr1|580032  
Poptr1|352739  
AT2G19450.1 Poptr1|582936,Poptr1|717213  
AT1G79810.1 Poptr1|645972,Poptr1|640890  
AT3G57990.1 Poptr1|576269,Poptr1|344461  
Poptr1|356592  
AT5G49650.1 Poptr1|665706  
Poptr1|553329  
Poptr1|347527  
AT4G05440.1 Poptr1|562404  
Poptr1|560500  
Poptr1|577356  
AT5G49510.1 Poptr1|687229,Poptr1|564372  
AT4G32690.1 Poptr1|695024  
Poptr1|578123,Poptr1|585726  
AT5G46690.1 Poptr1|349897,Poptr1|590022  
AT3G06120.1 Poptr1|354942  
AT2G46810.1,AT3G61950.1 Poptr1|348168,Poptr1|572471  
AT5G53210.1 Poptr1|100140,Poptr1|355213  
AT3G24140.1 Poptr1|701763,Poptr1|49263  
AT1G22490.1,AT1G72210.1 Poptr1|347436  
AT4G01460.1  
Poptr1|51696,Poptr1|562549,Poptr1|56592



AT2G24090.1 Poptr1|737939  
AT1G64430.1 Poptr1|554498,Poptr1|63418  
Poptr1|554499  
AT3G25100.1 Poptr1|666600  
AT2G36230.1 Poptr1|545428,Poptr1|553007  
AT1G11400.1 Poptr1|691251  
Poptr1|711808  
Poptr1|648020,Poptr1|553455  
AT5G03370.1 Poptr1|589469  
AT1G68660.1 Poptr1|658931,Poptr1|696577  
AT4G09620.1 Poptr1|592231  
Poptr1|574285  
AT5G47830.1 Poptr1|347630,Poptr1|591992  
AT2G45640.1 Poptr1|552094  
Poptr1|646530  
Poptr1|572151  
AT1G20080.1 Poptr1|652105,Poptr1|686657,Poptr1|546230,Poptr1|692983  
AT5G11100.1 Poptr1|578236  
AT5G04220.2 Poptr1|353374,Poptr1|55604  
AT2G21040.1,AT2G21010.1,AT2G20990.1  
AT1G05500.1  
Poptr1|595876  
Poptr1|704745  
Poptr1|669721  
AT5G40500.1 Poptr1|64805,Poptr1|736158  
AT1G67740.1 Poptr1|47246,Poptr1|686199  
AT5G04440.1 Poptr1|725124  
AT1G78995.1 Poptr1|696205  
AT5G56090.1 Poptr1|582551  
Poptr1|708165  
AT5G58020.1 Poptr1|344481,Poptr1|578768  
AT2G43640.1 Poptr1|672320  
AT2G14095.1 Poptr1|641961,Poptr1|577365  
Poptr1|347433,Poptr1|347432  
AT2G01490.1 Poptr1|695117  
AT5G19630.1 Poptr1|684701,Poptr1|547690  
AT5G24580.1 Poptr1|57444,Poptr1|569671  
AT5G60800.1,AT2G36950.1,AT5G03380.1 Poptr1|676051,Poptr1|576732,Poptr1|558297,Poptr1|584437  
AT3G02960.1 Poptr1|575985  
AT5G63530.1 Poptr1|728487  
AT2G28090.1  
Poptr1|595688  
Poptr1|666698,Poptr1|701224,Poptr1|351147  
Poptr1|666699  
AT3G49990.1 Poptr1|694818  
Poptr1|346740  
AT5G42150.1 Poptr1|73073  
Poptr1|569734  
AT3G18165.1 Poptr1|574967  
AT5G52810.1 Poptr1|556114  
AT1G48160.1 Poptr1|728715,Poptr1|733120  
AT1G28140.1 Poptr1|691119  
Poptr1|593460  
AT1G50170.1 Poptr1|63770  
AT4G24310.1,AT3G02430.1 Poptr1|596733,Poptr1|98689  
AT1G09157.1,AT5G39650.1 Poptr1|345116  
AT3G21550.1 Poptr1|564478,Poptr1|565691  
AT5G27370.1 Poptr1|699777  
AT5G46090.1,AT4G18425.1 Poptr1|546448,Poptr1|580950  
AT3G21520.1  
Poptr1|59795  
AT3G51000.1 Poptr1|686099  
AT3G05600.1 Poptr1|570761  
AT4G02340.1 Poptr1|731786,Poptr1|552463  
Poptr1|556509  
Poptr1|565561  
Poptr1|581900  
Poptr1|348275  
Poptr1|592094,Poptr1|558586  
Poptr1|582262  
Poptr1|47224  
Poptr1|664408,Poptr1|595926  
AT3G43600.1,AT5G20960.1 Poptr1|54299,Poptr1|59838  
AT4G34900.1,AT4G34890.1 Poptr1|54667  
AT2G27150.1,AT1G04580.1  
AT4G37500.1  
AT3G04390.1  
Poptr1|588887  
Poptr1|584085,Poptr1|595213  
Poptr1|588038  
Poptr1|586311  
Poptr1|580533

Poptr1|107952  
 Poptr1|587458  
 Poptr1|580532  
 AT5G25610.1 Poptr1|578117,Poptr1|561796  
 AT1G49320.1 Poptr1|682487,Poptr1|54466,Poptr1|546043  
 Poptr1|573607,Poptr1|573609,Poptr1|738158,Poptr1|573605,Poptr1|596258,Poptr1|671875,Poptr1|55630  
 3  
 Poptr1|586234  
 Poptr1|556450  
 AT5G59400.2 Poptr1|723247,Poptr1|691393  
 AT1G05460.1 Poptr1|102257  
 Poptr1|75921  
 AT2G04540.1 Poptr1|692201  
 AT5G46290.1 Poptr1|714498,Poptr1|568454  
 Poptr1|108612  
 Poptr1|684839,Poptr1|691067  
 AT1G54150.1 Poptr1|553614,Poptr1|548574  
 AT4G31200.1 Poptr1|98485,Poptr1|61220  
 Poptr1|582673  
 AT5G51300.1 Poptr1|554163,Poptr1|703000  
 AT5G64620.1 Poptr1|75589  
 AT4G15620.1,AT4G15630.1 Poptr1|590593,Poptr1|657692,Poptr1|106120  
 AT1G78895.1 Poptr1|697043  
 AT1G16830.1  
 AT2G15820.1 Poptr1|557336  
 Poptr1|581471  
 AT4G25290.1 Poptr1|734004  
 AT5G14690.1,AT3G01516.1 Poptr1|64755  
 AT4G14240.1,AT4G14230.1 Poptr1|725748,Poptr1|354928  
 AT4G33700.1,AT2G14520.1 Poptr1|707481,Poptr1|722481  
 AT1G03270.1  
 AT1G47330.1  
 AT5G52590.1 Poptr1|578918,Poptr1|695515  
 AT5G58520.1,AT5G07140.1 Poptr1|649807  
 Poptr1|104051  
 Poptr1|641516  
 AT3G54670.1 Poptr1|559701  
 AT2G34920.1,AT1G30860.1 Poptr1|63273,Poptr1|693314  
 AT5G44690.1  
 AT4G20160.1  
 AT3G62660.1 Poptr1|552490,Poptr1|664389  
 AT1G24170.1,AT1G70090.1 Poptr1|355002,Poptr1|657556  
 AT1G13250.1 Poptr1|354131,Poptr1|55285  
 AT1G19300.1 Poptr1|551913  
 AT3G06260.1 Poptr1|655753,Poptr1|660128  
 AT4G02130.1,AT1G02720.1  
 AT3G28340.1  
 AT3G50760.1  
 Poptr1|686070,Poptr1|357020  
 Poptr1|59426  
 AT5G57120.1 Poptr1|652849,Poptr1|669817  
 AT4G39680.1 Poptr1|558581,Poptr1|718854  
 AT3G24080.1 Poptr1|689524  
 AT4G02880.1,AT1G03290.1 Poptr1|572812  
 AT5G64980.1  
 AT2G03150.1 Poptr1|567018  
 Poptr1|564231  
 Poptr1|353869  
 AT3G06060.1,AT5G19200.1 Poptr1|47323  
 AT4G01590.1,AT4G35680.1 Poptr1|349634  
 Poptr1|572265  
 AT5G18480.1 Poptr1|699864  
 AT1G32560.1 Poptr1|356610  
 AT2G35300.1  
 Poptr1|580088  
 Poptr1|664998  
 AT4G03420.1,AT1G03610.1 Poptr1|571766,Poptr1|580373  
 AT5G49220.1 Poptr1|697769  
 AT1G73210.1,AT1G17830.1 Poptr1|584513,Poptr1|61173  
 AT1G15030.1,AT2G01260.1 Poptr1|719815,Poptr1|658850  
 AT4G28150.1  
 AT4G16100.1  
 AT5G23380.1  
 AT5G08360.1  
 Poptr1|583977  
 Poptr1|680668  
 Poptr1|595912,Poptr1|582126  
 AT4G03180.1 Poptr1|572745,Poptr1|573507  
 AT1G20110.1 Poptr1|652116  
 Poptr1|710650  
 Poptr1|709921  
 AT2G42840.1 Poptr1|694658

Poptr1|643400  
 AT1G27750.1 Poptr1|572044  
 Poptr1|572045  
 AT5G62550.1 Poptr1|581358  
 AT5G38840.1 Poptr1|584644  
 AT3G18860.1 Poptr1|556434,Poptr1|722112  
 AT4G34460.1 Poptr1|556457,Poptr1|557264  
 AT3G18140.1 Poptr1|667428  
 AT2G22040.1  
 AT1G19490.1 Poptr1|589581  
 AT1G45170.1,AT5G42960.1 Poptr1|573245  
 Poptr1|76271  
 AT1G45231.2 Poptr1|591959  
 AT1G30550.1  
 AT2G05830.1 Poptr1|717779  
 AT4G17380.1 Poptr1|589877  
 Poptr1|349746  
 AT3G24320.1 Poptr1|54982  
 AT1G76390.1,AT1G20780.1 Poptr1|559967,Poptr1|550752,Poptr1|593178  
 AT1G68940.1 Poptr1|354098  
 Poptr1|572430,Poptr1|555010,Poptr1|547841,Poptr1|548123,Poptr1|345750,Poptr1|552314,Poptr1|57470  
 3  
 Poptr1|355338,Poptr1|572431  
 AT5G57370.1 Poptr1|578585  
 Poptr1|580476  
 AT2G28910.1 Poptr1|589953  
 AT1G13190.1 Poptr1|565962  
 AT5G55670.1  
 AT1G64450.1 Poptr1|350361,Poptr1|548328  
 AT4G23930.1  
 AT5G47635.1,AT2G40113.1,AT4G17215.1 Poptr1|716934  
 AT3G14740.2 Poptr1|99452,Poptr1|65643  
 AT2G15860.1 Poptr1|697310  
 AT4G11110.1 Poptr1|63453,Poptr1|350321  
 AT1G53090.1,AT3G15354.1 Poptr1|728392,Poptr1|703945  
 AT5G52250.1,AT5G23730.1 Poptr1|57811,Poptr1|662347  
 AT5G44200.1 Poptr1|689756,Poptr1|718228  
 AT4G11640.1 Poptr1|548481  
 AT5G05130.1 Poptr1|351385  
 Poptr1|582002,Poptr1|576145,Poptr1|576140,Poptr1|576135  
 AT3G54460.1 Poptr1|350861  
 AT2G40770.1 Poptr1|581093  
 Poptr1|581098  
 AT3G48880.1 Poptr1|346095  
 AT4G11580.1  
 Poptr1|550273  
 AT4G01940.1 Poptr1|692248,Poptr1|700388  
 AT5G49665.1 Poptr1|684451  
 AT5G60710.1 Poptr1|344898,Poptr1|558275  
 AT2G22680.1,AT4G37890.1,AT5G65683.1  
 AT3G54780.1  
 AT1G09800.1 Poptr1|745559  
 Poptr1|590934  
 AT4G16970.1 Poptr1|580170,Poptr1|346195  
 Poptr1|553933  
 AT4G08310.1,AT1G44780.1 Poptr1|694554,Poptr1|692717  
 AT3G62080.1 Poptr1|552626  
 AT5G63910.1 Poptr1|592576  
 Poptr1|678386,Poptr1|654683  
 AT5G42360.1,AT5G42350.1 Poptr1|559968,Poptr1|597342,Poptr1|642795,Poptr1|559969  
 AT1G23390.1 Poptr1|566051  
 AT3G24760.1  
 AT3G51970.1 Poptr1|734540,Poptr1|54666,Poptr1|549263  
 AT5G55330.1,AT5G55360.1,AT5G51420.1,AT5G55350.1  
 Poptr1|575959,Poptr1|63567,Poptr1|344003  
 Poptr1|64448,Poptr1|64457  
 AT1G29990.1 Poptr1|714511  
 AT4G33360.1 Poptr1|692522,Poptr1|551866  
 AT1G56090.1 Poptr1|71850  
 AT4G05210.1,AT4G21220.1 Poptr1|545052  
 AT5G20420.1,AT3G42670.1 Poptr1|656302  
 Poptr1|659449  
 Poptr1|567215  
 Poptr1|659448  
 AT4G24710.1 Poptr1|728506,Poptr1|575244  
 AT1G18190.1 Poptr1|700856  
 AT1G33480.1,AT4G10170.1 Poptr1|730429,Poptr1|646001  
 AT4G00110.1,AT1G02000.1 Poptr1|644324,Poptr1|663797  
 AT4G30440.1 Poptr1|578682,Poptr1|561380  
 AT3G23820.1 Poptr1|597069,Poptr1|707167  
 AT2G45310.1  
 AT4G12250.1

Poptr1|662454  
 AT2G44580.1 Poptr1|64786  
 AT1G15200.1 Poptr1|691252  
 Poptr1|349284  
 AT5G27450.1 Poptr1|742256  
 Poptr1|575646,Poptr1|680106,Poptr1|729638  
 AT4G29910.1 Poptr1|65659,Poptr1|572271  
 AT5G55640.1 Poptr1|550204  
 AT2G26270.1 Poptr1|352583  
 AT3G43930.1  
 AT1G80510.1 Poptr1|48870,Poptr1|592681  
 AT3G30390.1 Poptr1|584645,Poptr1|690077  
 AT3G56200.1,AT2G40420.1 Poptr1|698462  
 AT5G38820.1  
 Poptr1|592680  
 Poptr1|342561  
 Poptr1|568853  
 Poptr1|579099  
 Poptr1|552755  
 Poptr1|564098  
 AT5G48240.1 Poptr1|700638  
 AT4G12340.1 Poptr1|350096,Poptr1|683357,Poptr1|677333  
 AT3G16810.1 Poptr1|565506,Poptr1|596085  
 AT3G57790.1 Poptr1|576311  
 AT5G23080.1 Poptr1|569839  
 AT1G54170.1,AT3G14010.1 Poptr1|349472  
 Poptr1|640624  
 AT3G24880.1 Poptr1|348980  
 AT3G24870.1  
 AT4G35990.1 Poptr1|593833,Poptr1|553989  
 AT4G35987.1  
 AT2G20180.2 Poptr1|553260  
 AT4G28800.1,AT4G28790.1  
 AT4G28810.1  
 AT2G37110.1 Poptr1|675982,Poptr1|667766  
 AT5G67100.1 Poptr1|562960  
 AT1G55540.1 Poptr1|547569,Poptr1|555171  
 AT1G55545.1  
 Poptr1|62665  
 AT5G46230.1 Poptr1|647799  
 AT1G09310.1,AT1G56580.1 Poptr1|581672,Poptr1|570697  
 AT5G49600.1 Poptr1|566870  
 AT4G24130.1 Poptr1|640272,Poptr1|712665  
 AT1G30020.1  
 Poptr1|545188,Poptr1|552919  
 Poptr1|648157  
 Poptr1|592397  
 AT5G66470.1 Poptr1|563187  
 AT1G71500.1 Poptr1|581428  
 AT1G69750.1,AT1G66590.2 Poptr1|705790  
 AT5G43630.1 Poptr1|354560,Poptr1|566137,Poptr1|103392,Poptr1|564923  
 AT2G45140.1,AT3G60600.1 Poptr1|59370,Poptr1|684989,Poptr1|552015  
 AT4G00170.1 Poptr1|552020  
 AT5G47180.1 Poptr1|646164,Poptr1|356520  
 AT1G08820.1 Poptr1|595507  
 AT1G51270.1  
 Poptr1|591667  
 Poptr1|702877  
 Poptr1|729741  
 Poptr1|565636  
 AT5G61330.1 Poptr1|738865  
 AT4G24270.2 Poptr1|596792  
 AT5G56960.1 Poptr1|561062  
 AT3G24535.1 Poptr1|553721,Poptr1|578461,Poptr1|63994  
 AT3G16070.1  
 AT1G15260.1  
 AT3G24530.1 Poptr1|584014,Poptr1|578467  
 Poptr1|565408  
 AT5G64813.1 Poptr1|650824,Poptr1|682326  
 AT5G09910.1  
 AT3G49600.1 Poptr1|684516,Poptr1|716695  
 AT5G35100.1 Poptr1|653521  
 AT4G11010.1,AT4G23900.1 Poptr1|640355,Poptr1|341656  
 AT4G09320.1 Poptr1|644252,Poptr1|591761  
 AT5G63310.1 Poptr1|356005  
 AT1G17410.1 Poptr1|693759  
 Poptr1|109259  
 Poptr1|107419  
 AT1G74070.1 Poptr1|569844  
 AT5G38360.1 Poptr1|555856  
 AT2G24990.1,AT5G37350.1 Poptr1|575357  
 AT3G51270.1 Poptr1|690488

AT5G11460.1 Poptr1|668964,Poptr1|561807,Poptr1|691219  
AT2G25690.1  
AT1G79970.1  
AT5G63110.1 Poptr1|570119,Poptr1|575223  
AT3G44680.1 Poptr1|684089  
AT5G35600.1  
AT3G44660.1,AT3G44490.1  
Poptr1|569317  
AT2G41010.1,AT3G56880.1 Poptr1|652520,Poptr1|576097  
AT4G13840.1,AT3G23840.1 Poptr1|549793  
AT4G24510.1 Poptr1|558994  
AT3G55080.1 Poptr1|353467  
Poptr1|562899  
AT5G17240.1 Poptr1|556031  
AT1G07700.3 Poptr1|677848  
AT2G37070.1,AT3G53320.1 Poptr1|589396  
Poptr1|353437  
AT3G56230.1 Poptr1|681220  
AT1G25520.1,AT1G68650.1 Poptr1|566658,Poptr1|60270  
AT5G36290.1 Poptr1|681242,Poptr1|665576  
AT4G13590.1 Poptr1|708677  
AT1G64150.1 Poptr1|693403  
Poptr1|656785  
Poptr1|595319  
Poptr1|647089  
Poptr1|647087  
Poptr1|640414  
AT2G30600.1 Poptr1|684678,Poptr1|52265  
AT3G57060.1 Poptr1|560411  
AT3G56330.1 Poptr1|571638  
AT3G15620.1 Poptr1|349500  
AT1G49540.1 Poptr1|723689  
Poptr1|564564  
AT1G08500.1 Poptr1|691487  
Poptr1|572141  
AT4G13050.1,AT3G25110.1 Poptr1|349000  
AT1G75560.1 Poptr1|694817,Poptr1|556532  
AT5G02770.1 Poptr1|667725,Poptr1|675939  
AT5G37590.1 Poptr1|545490  
AT5G37580.1  
AT3G45830.1 Poptr1|54769,Poptr1|49042  
AT3G28030.1 Poptr1|577489  
AT4G24880.1 Poptr1|688539  
AT2G42770.1 Poptr1|587772  
AT2G22720.2 Poptr1|696177,Poptr1|72133  
AT4G37860.1  
AT5G41480.1 Poptr1|100141  
AT4G21800.1 Poptr1|566858,Poptr1|564369  
AT4G11450.1 Poptr1|343634,Poptr1|548464  
AT1G63520.1  
AT1G01930.1 Poptr1|692428  
AT2G02710.1 Poptr1|696331  
AT1G69935.1 Poptr1|565204  
AT4G33780.1 Poptr1|65318  
Poptr1|557542  
AT2G20330.1 Poptr1|573381  
AT4G01860.1 Poptr1|348407  
AT5G03280.1 Poptr1|702739,Poptr1|58107  
AT5G49210.1 Poptr1|549808  
Poptr1|671378  
AT5G44450.1 Poptr1|569328  
AT3G06510.1 Poptr1|659129  
Poptr1|659130  
AT4G33660.1 Poptr1|661429  
Poptr1|586596,Poptr1|586597  
Poptr1|580569  
AT1G05870.1,AT2G31560.1 Poptr1|695781,Poptr1|679554  
AT2G43340.1  
ATMG00520.1 Poptr1|645616  
AT1G22790.1 Poptr1|559415,Poptr1|643442  
AT1G34010.1  
AT3G27340.1 Poptr1|641729  
AT5G01010.1 Poptr1|734436  
Poptr1|589587  
AT5G14240.1 Poptr1|549662  
Poptr1|668415  
AT4G27540.1 Poptr1|728371,Poptr1|703935  
AT3G04260.1 Poptr1|665350  
Poptr1|665348  
Poptr1|665349  
Poptr1|665351  
AT5G02250.1 Poptr1|685742

AT3G52460.1 Poptr1|352134,Poptr1|576516  
Poptr1|576515  
Poptr1|580114  
AT4G25000.1 Poptr1|644125,Poptr1|591946  
AT1G69830.1 Poptr1|698106  
AT1G76130.1 Poptr1|642873  
Poptr1|748076  
Poptr1|577743  
AT3G20600.1,AT3G20610.1,AT3G20590.1 Poptr1|569081,Poptr1|571486  
Poptr1|544879  
AT1G79760.1 Poptr1|568253,Poptr1|64070  
AT1G15860.1 Poptr1|684770,Poptr1|639936  
Poptr1|578791  
Poptr1|673874  
AT3G12760.1 Poptr1|682414  
AT5G23590.1 Poptr1|721640  
AT4G16510.1 Poptr1|343552  
AT2G05910.1 Poptr1|589298  
AT5G20640.1  
AT1G03110.1 Poptr1|559573  
Poptr1|346961  
AT2G14045.1 Poptr1|586802  
AT4G13580.1,AT3G24020.1 Poptr1|554808,Poptr1|640004  
Poptr1|640003  
AT4G21000.1,AT4G20990.1 Poptr1|576238,Poptr1|695558  
AT3G52720.1 Poptr1|561502,Poptr1|576594  
AT1G08080.1 Poptr1|595085  
AT5G04180.1  
AT1G08065.1  
AT2G28210.1  
Poptr1|560469  
Poptr1|579868  
Poptr1|589499  
AT5G04430.2 Poptr1|698695  
Poptr1|563662  
AT5G59960.1 Poptr1|723319  
Poptr1|549198  
AT1G17680.1 Poptr1|582731,Poptr1|594398  
AT3G62940.2 Poptr1|572740  
AT3G05520.1 Poptr1|687925,Poptr1|581880  
AT5G17370.1 Poptr1|691007  
Poptr1|350474  
AT5G37860.1 Poptr1|345601,Poptr1|566516,Poptr1|656894,Poptr1|555928  
AT4G23882.1,AT1G30473.1 Poptr1|97486  
AT1G56210.1 Poptr1|581872  
AT3G06130.1,AT5G19090.1  
AT1G23000.1  
AT3G04900.1  
Poptr1|549738,Poptr1|557151  
Poptr1|572828  
AT4G30990.1 Poptr1|65061  
AT1G79890.1 Poptr1|48880  
AT1G09995.1  
AT1G49590.1 Poptr1|557351  
AT5G09860.1 Poptr1|547791,Poptr1|711938  
AT2G17705.1 Poptr1|679078  
AT5G35910.1 Poptr1|58923  
AT1G54440.1  
AT2G35920.1 Poptr1|576491  
AT2G30800.1 Poptr1|685351  
AT1G58060.1,AT1G58050.1 Poptr1|742486  
AT2G01130.1 Poptr1|698212  
AT1G06670.1  
AT1G48650.1  
Poptr1|551207  
Poptr1|681012  
Poptr1|656864  
AT1G05410.1 Poptr1|55125  
AT2G46225.1 Poptr1|664050,Poptr1|711266  
AT3G58460.1 Poptr1|685658  
AT5G52800.1 Poptr1|592923  
AT1G07270.1,AT2G29680.1 Poptr1|683807  
AT5G06550.1 Poptr1|576449  
Poptr1|673125  
AT3G29770.1 Poptr1|556382,Poptr1|668674  
AT1G33990.1,AT4G09900.1 Poptr1|574217  
AT1G26360.1,AT1G69240.1  
Poptr1|564309  
Poptr1|589035  
AT1G11240.1 Poptr1|568294,Poptr1|647711  
AT2G19690.1,AT4G29460.1,AT4G29470.1 Poptr1|717006  
AT5G47920.1 Poptr1|572822,Poptr1|554663

AT5G13880.1  
AT2G42180.1,AT3G57950.1 Poptr1|561267,Poptr1|576274  
AT5G06790.1  
AT5G58760.1 Poptr1|691359  
AT5G47090.1 Poptr1|356543  
AT4G27120.1 Poptr1|571498  
AT5G59900.1,AT1G63130.1,AT2G37230.1,AT2G17525.1,AT1G19290.1,AT5G40400.1,AT1G53330.1,AT1G55630.1,AT1G62590.1,AT3G16710.1,AT5G28370.1,AT3G07290.1,AT1G51965.1,AT5G55840.1,AT3G06920.1,AT4G30825.1,AT5G14770.1,AT1G79080.1,AT2G01740.1,AT2G06000.1,AT4G28010.1,AT1G09680.1,AT1G10910.1,AT1G52620.1,AT1G06710.1,AT5G06400.1,AT1G62680.1,AT1G62720.1,AT5G65560.1,AT3G22670.1,AT3G18020.1,AT5G50280.1,AT3G16010.1,AT1G62670.1,AT5G61400.1,AT3G09060.1,AT5G12100.1,AT5G41170.1,AT3G60050.1,AT1G79540.1,AT3G22470.1,AT3G61520.1,AT1G06580.1,AT1G09820.1,AT1G05670.1,AT2G32630.1,AT3G62540.1,AT3G18110.1,AT1G63400.1,AT5G28460.1,AT5G04810.1,AT5G18950.1,AT1G63070.1,AT1G62860.1,AT3G04760.1,AT5G62370.1,AT1G64580.1,AT3G62470.1,AT5G64320.1,AT1G13040.1,AT4G20740.1,AT5G25630.1,AT5G14080.1,AT1G74850.1,AT1G64100.1,AT5G27270.1,AT2G36240.1,AT1G74580.1,AT2G15630.1,AT3G48810.1,AT1G31840.1,AT5G02860.1,AT1G20300.1,AT5G61990.1,AT1G12700.1,AT1G63330.1,AT4G31850.1,AT1G63080.1,AT1G07740.1,AT1G09900.1,AT1G03560.1,AT2G35130.1,AT5G38730.1,AT5G65820.1,AT2G16880.1,AT1G13630.1,AT4G19440.1,AT5G14820.1  
Poptr1|64421,Poptr1|590038,Poptr1|554608,Poptr1|573736,Poptr1|545424,Poptr1|571099,Poptr1|572467,Poptr1|595001,Poptr1|562052,Poptr1|570962,Poptr1|561860,Poptr1|652706,Poptr1|694202,Poptr1|594959,Poptr1|570963,Poptr1|566355,Poptr1|641463,Poptr1|64210,Poptr1|700893,Poptr1|59427,Poptr1|568019,Poptr1|579545,Poptr1|642585,Poptr1|355295,Poptr1|556821,Poptr1|350013,Poptr1|595495,Poptr1|571775,Poptr1|348133,Poptr1|552934,Poptr1|595490,Poptr1|561611,Poptr1|54492,Poptr1|344176,Poptr1|591735,Poptr1|571828,Poptr1|563546,Poptr1|570961,Poptr1|595453,Poptr1|58396,Poptr1|659351,Poptr1|60520,Poptr1|555301,Poptr1|558673,Poptr1|58515,Poptr1|73096,Poptr1|660070,Poptr1|566746,Poptr1|348160,Poptr1|565140,Poptr1|560193,Poptr1|60724,Poptr1|352166,Poptr1|551635,Poptr1|71904,Poptr1|581958,Poptr1|561789,Poptr1|643923,Poptr1|556143,Poptr1|575451,Poptr1|576926,Poptr1|577492,Poptr1|577179,Poptr1|570945,Poptr1|562284,Poptr1|595455,Poptr1|580949,Poptr1|595494,Poptr1|589471,Poptr1|553549,Poptr1|594093,Poptr1|572312,Poptr1|595506  
AT2G18940.1 Poptr1|580506  
AT2G01390.1 Poptr1|346431  
AT1G80550.1 Poptr1|558946  
AT2G38420.1 Poptr1|351968  
AT2G15980.1 Poptr1|556421  
AT3G61360.1 Poptr1|590122  
AT4G11690.1 Poptr1|552933  
AT5G46580.1 Poptr1|580097  
AT3G14580.1 Poptr1|550328  
AT1G74900.1 Poptr1|575099  
AT3G23020.1 Poptr1|566158  
AT5G39980.1 Poptr1|58353  
AT4G26680.1 Poptr1|573090  
AT3G15200.1 Poptr1|568856  
AT1G71060.1 Poptr1|566519  
AT3G56030.1,AT2G40240.1 Poptr1|696476  
AT1G80150.1 Poptr1|349476,Poptr1|63690  
AT5G16420.1 Poptr1|569480  
AT2G26790.1,AT1G22960.1,AT2G39230.1,AT3G53700.1,AT1G13800.1,AT5G46100.1,AT1G12300.1,AT1G30290.1,AT3G16890.1,AT1G02060.1,AT4G20090.1,AT5G42310.1,AT2G17670.1,AT3G53170.1,AT1G12775.1,AT5G39710.1,AT1G11710.1,AT1G74750.1,AT1G12620.1,AT2G17140.1,AT5G01110.1  
Poptr1|702129,Poptr1|594491,Poptr1|564419,Poptr1|97050,Poptr1|740126,Poptr1|583530,Poptr1|664359,Poptr1|589891,Poptr1|103332,Poptr1|574996,Poptr1|581161,Poptr1|343994,Poptr1|692254,Poptr1|595479,Poptr1|666857,Poptr1|356657,Poptr1|579408,Poptr1|572581,Poptr1|698030,Poptr1|550219,Poptr1|565409,Poptr1|58856,Poptr1|65260,Poptr1|582461,Poptr1|73145,Poptr1|566866  
AT5G61370.1 Poptr1|355753  
AT5G24830.1 Poptr1|705018  
AT5G15010.1 Poptr1|571163  
AT2G30780.1 Poptr1|735892  
AT1G73400.1 Poptr1|566357  
AT1G01970.1 Poptr1|572116  
AT1G63150.1,AT2G41720.1 Poptr1|560491  
AT4G16390.1 Poptr1|652442,Poptr1|688640,Poptr1|560214  
AT1G80880.1 Poptr1|587200  
AT3G25210.1 Poptr1|645468  
AT1G02420.1 Poptr1|562729  
AT4G39620.1 Poptr1|71704  
AT1G77360.1 Poptr1|651465  
AT1G26500.1 Poptr1|576654  
AT5G11310.1 Poptr1|352857  
AT5G18390.1 Poptr1|573784  
AT3G13160.1,AT1G55890.1 Poptr1|647668,Poptr1|568378,Poptr1|727768  
AT3G29290.1 Poptr1|577715  
AT1G63230.1,AT3G06430.1,AT1G77340.1,AT5G18475.1,AT5G21222.1,AT1G52640.1,AT1G66345.1,AT1G62910.1,AT2G31400.1,AT1G18900.1,AT5G43820.1,AT3G59040.2,AT1G63630.1,AT5G60960.1,AT2G19280.1,AT1G79490.1,AT5G46680.1,AT1G62930.1,AT3G04130.1  
Poptr1|562281,Poptr1|727210,Poptr1|589286,Poptr1|561997,Poptr1|566211,Poptr1|354693,Poptr1|552918,Poptr1|98635,Poptr1|558801,Poptr1|550163,Poptr1|346590,Poptr1|73116,Poptr1|553427,Poptr1|552984,Poptr1|107717,Poptr1|106291,Poptr1|575821,Poptr1|595489,Poptr1|573722,Poptr1|548182,Poptr1|566212,Poptr1|583791  
AT1G11900.1 Poptr1|549371  
AT4G01570.1 Poptr1|552386  
AT2G18520.1,AT4G36680.1 Poptr1|53362,Poptr1|356995  
AT1G06270.1 Poptr1|582777  
AT1G19520.1 Poptr1|346812,Poptr1|715225  
AT5G48730.1 Poptr1|553179,Poptr1|348982

AT4G38150.1 Poptr1|679994  
AT1G11630.1,AT1G61870.1 Poptr1|567991,Poptr1|555346  
AT4G21170.1 Poptr1|555365  
AT1G73710.1,AT5G16640.1  
AT5G15280.1  
AT1G05600.1  
AT3G54980.1  
AT4G34830.1  
AT3G46610.1  
AT3G49240.1  
AT4G34820.1  
AT1G76280.1  
AT2G01360.1  
AT1G08610.1  
AT5G47360.1  
AT1G63320.1  
AT2G48000.1  
AT2G27800.1  
AT3G13150.1  
AT1G19525.1  
Poptr1|594065  
Poptr1|104472  
Poptr1|101821,Poptr1|343864,Poptr1|558446,Poptr1|701974,Poptr1|662085,Poptr1|570029,Poptr1|59153  
1,Poptr1|662499,Poptr1|640705  
Poptr1|107832,Poptr1|48846,Poptr1|100696,Poptr1|562855,Poptr1|597591,Poptr1|353997,Poptr1|581077,  
Poptr1|554980  
Poptr1|586938  
Poptr1|559656,Poptr1|583437,Poptr1|576069,Poptr1|346882,Poptr1|557319  
Poptr1|59545  
Poptr1|71849,Poptr1|588321,Poptr1|595553  
Poptr1|589470  
Poptr1|571826,Poptr1|582795  
Poptr1|346078  
Poptr1|662498,Poptr1|583789,Poptr1|560101,Poptr1|594473,Poptr1|594128,Poptr1|549727  
Poptr1|562881  
Poptr1|348017  
Poptr1|352811  
Poptr1|580399  
Poptr1|594148  
Poptr1|354823  
Poptr1|557306  
Poptr1|356599  
Poptr1|354538  
Poptr1|354234  
Poptr1|97560  
Poptr1|558739,Poptr1|586790  
Poptr1|552329  
Poptr1|595492  
Poptr1|698297  
Poptr1|557802,Poptr1|64526  
Poptr1|557683  
Poptr1|571164  
Poptr1|561791  
Poptr1|354375  
Poptr1|652441  
Poptr1|560213  
Poptr1|578147  
Poptr1|555446  
Poptr1|664332  
Poptr1|571830,Poptr1|104589,Poptr1|561788,Poptr1|556096,Poptr1|656557  
Poptr1|594495  
Poptr1|353807  
Poptr1|586829  
Poptr1|579854  
Poptr1|552388  
AT5G11290.1,AT4G31980.1  
Poptr1|554954,Poptr1|58549,Poptr1|639891,Poptr1|583937,Poptr1|62983,Poptr1|101545,Poptr1|554929,  
Poptr1|350766,Poptr1|350772,Poptr1|350784,Poptr1|554938,Poptr1|343852,Poptr1|590447,Poptr1|350783,Poptr1|64  
7214,Poptr1|677514,Poptr1|573606,Poptr1|554958,Poptr1|583938  
AT5G22550.2,AT5G22540.1,AT3G44710.1,AT5G22560.1  
Poptr1|589734,Poptr1|589100,Poptr1|346374,Poptr1|594823,Poptr1|53431  
AT3G50170.1,AT3G50120.1 Poptr1|696010  
AT1G65985.1,AT1G67150.2,AT2G44930.1,AT2G28580.1  
Poptr1|594572,Poptr1|591723,Poptr1|585524,Poptr1|679631,Poptr1|589077,Poptr1|101353,Poptr1|56220  
4,Poptr1|594575,Poptr1|594560,Poptr1|589080,Poptr1|589079  
AT3G47250.1,AT3G47200.1,AT3G47210.1  
AT3G44700.1  
AT2G36430.1  
AT3G50180.1,AT3G50150.1,AT3G50130.1  
AT3G50160.1  
AT3G50190.1,AT3G50140.1  
AT3G50200.1



Poptr1|350765,Poptr1|594776,Poptr1|554940,Poptr1|350761,Poptr1|101845,Poptr1|104892,Poptr1|58831  
 5,Poptr1|101542,Poptr1|554935,Poptr1|102944,Poptr1|554925,Poptr1|350788,Poptr1|102551,Poptr1|101841  
 Poptr1|103493,Poptr1|101549,Poptr1|590455  
 Poptr1|594351,Poptr1|593570  
 Poptr1|594773  
 Poptr1|561869  
 Poptr1|594197,Poptr1|591463,Poptr1|703318,Poptr1|102615,Poptr1|571791,Poptr1|571787,Poptr1|58859  
 1  
 Poptr1|554930  
 Poptr1|589648  
 Poptr1|594772  
 Poptr1|554654,Poptr1|594192,Poptr1|554655,Poptr1|63245,Poptr1|106842  
 Poptr1|576198,Poptr1|576203  
 Poptr1|641781,Poptr1|549673  
 Poptr1|595256  
 Poptr1|581650,Poptr1|569445,Poptr1|569528,Poptr1|355263,Poptr1|593571,Poptr1|588238,Poptr1|56944  
 4,Poptr1|355255,Poptr1|355251,Poptr1|97601,Poptr1|703031,Poptr1|581647,Poptr1|588833,Poptr1|355262,Poptr1|59  
 1094  
 Poptr1|594061  
 Poptr1|594582  
 AT4G19420.1 Poptr1|596845  
 AT5G45280.2,AT4G19410.1 Poptr1|553558,Poptr1|703824  
 AT3G62060.1,AT2G46930.1 Poptr1|572510  
 AT5G23870.3 Poptr1|575835,Poptr1|728572  
 AT3G09410.1 Poptr1|344241  
 AT5G26670.1,AT3G05910.1 Poptr1|662513,Poptr1|581591  
 AT1G57590.1  
 AT1G09550.1  
 Poptr1|568313  
 Poptr1|552413  
 Poptr1|697795  
 AT2G34640.1 Poptr1|550130  
 Poptr1|568573  
 AT1G60640.1 Poptr1|593237,Poptr1|546484,Poptr1|348864  
 AT1G77470.1 Poptr1|551429  
 Poptr1|559258  
 AT1G63160.1 Poptr1|684887  
 AT3G50850.1,AT5G49560.1 Poptr1|696097  
 AT5G52370.1,AT5G58990.1 Poptr1|650201,Poptr1|706064  
 AT1G49620.1,AT3G19150.1 Poptr1|557369  
 AT3G15470.1 Poptr1|55976,Poptr1|579499  
 AT2G37670.1 Poptr1|344239  
 AT1G64610.1,AT5G42010.1 Poptr1|355320,Poptr1|709083,Poptr1|343712,Poptr1|684310  
 AT5G54200.1  
 AT5G02430.1  
 AT1G01770.1 Poptr1|342743  
 Poptr1|590422,Poptr1|587454  
 AT4G23880.1 Poptr1|63423,Poptr1|546027,Poptr1|583539,Poptr1|350350,Poptr1|350351  
 AT1G05385.1 Poptr1|564841  
 AT5G53770.1 Poptr1|579472  
 AT5G11240.1 Poptr1|54883  
 AT2G04560.1 Poptr1|573031  
 AT5G11010.3 Poptr1|570022  
 AT2G13840.1 Poptr1|63908  
 AT5G48870.1 Poptr1|557672,Poptr1|641475  
 AT3G60510.1 Poptr1|703021  
 AT2G30650.1,AT5G65940.1,AT2G30660.1 Poptr1|732648  
 AT4G31810.1 Poptr1|578284  
 AT1G06550.1 Poptr1|692802  
 AT3G24360.1,AT4G13360.1 Poptr1|685671  
 Poptr1|356477  
 Poptr1|583178,Poptr1|586337,Poptr1|586335,Poptr1|105975  
 Poptr1|561991  
 AT3G51390.1 Poptr1|356806  
 Poptr1|585672  
 Poptr1|554019  
 Poptr1|593030  
 Poptr1|590272  
 ATCG00750.1 Poptr1|748843,Poptr1|584659  
 Poptr1|582627  
 AT4G08230.1 Poptr1|643653,Poptr1|559206  
 AT1G12470.1 Poptr1|730530  
 AT2G43780.1 Poptr1|574418,Poptr1|675668  
 Poptr1|671865  
 AT5G17930.1 Poptr1|571243  
 Poptr1|571242  
 AT2G04940.1 Poptr1|733374  
 AT5G57330.1 Poptr1|693145,Poptr1|580517,Poptr1|48476,Poptr1|737712  
 AT5G66530.1 Poptr1|719543  
 AT3G01590.1,AT5G14500.1 Poptr1|64811  
 AT3G61610.1 Poptr1|711145  
 AT4G25900.1

Poptr1|590777  
 Poptr1|548373  
 AT4G37900.1,AT2G22660.2 Poptr1|733022  
 Poptr1|711590  
 AT4G17620.1 Poptr1|689461  
 AT5G26610.1 Poptr1|581599,Poptr1|570654  
 AT4G04670.1 Poptr1|685149  
 Poptr1|582463  
 AT1G50650.1 Poptr1|550098  
 AT5G55110.1,AT4G26880.1,AT1G50720.1 Poptr1|65399,Poptr1|55808,Poptr1|103972  
 AT1G53130.1 Poptr1|568893,Poptr1|579454  
 Poptr1|587330  
 Poptr1|555456,Poptr1|99326,Poptr1|584702,Poptr1|588436,Poptr1|584703,Poptr1|588432,Poptr1|584701,  
 Poptr1|584700  
 AT5G62170.1 Poptr1|356320,Poptr1|575739  
 AT4G25430.1,AT5G51850.1  
 AT4G34490.1 Poptr1|556459,Poptr1|722043  
 AT1G29950.1 Poptr1|568451  
 AT2G33740.2 Poptr1|643847  
 AT1G14900.1 Poptr1|566465,Poptr1|354274  
 Poptr1|692140,Poptr1|555965  
 AT5G58070.1 Poptr1|738040  
 Poptr1|597186  
 AT2G28450.1 Poptr1|558250  
 AT3G46550.1 Poptr1|561415  
 AT3G60900.1,AT2G45470.1 Poptr1|730907  
 AT3G12660.1 Poptr1|547729,Poptr1|583168  
 AT2G24450.1,AT4G31370.1 Poptr1|100040  
 AT5G55730.1 Poptr1|684039,Poptr1|55851  
 Poptr1|578652  
 AT5G22340.2 Poptr1|697083  
 Poptr1|594942  
 AT4G34280.1 Poptr1|557476,Poptr1|100381,Poptr1|691750  
 AT1G52980.1 Poptr1|703958  
 AT1G06060.1 Poptr1|346757,Poptr1|694808  
 AT3G55070.1 Poptr1|563817  
 AT3G22660.1 Poptr1|575699  
 AT1G44835.2 Poptr1|559217  
 Poptr1|347274  
 AT1G64880.1 Poptr1|571390  
 Poptr1|109271  
 AT5G63905.1 Poptr1|572034,Poptr1|342571  
 AT3G49540.1,AT5G54095.1,AT4G27580.1 Poptr1|574623,Poptr1|355441,Poptr1|569691  
 AT2G27550.1 Poptr1|721288  
 AT4G20370.1,AT1G65480.1 Poptr1|582519,Poptr1|103812,Poptr1|345078  
 AT1G18100.1 Poptr1|57525  
 AT5G03840.1  
 Poptr1|55440  
 Poptr1|567173  
 Poptr1|573457  
 AT4G20260.4 Poptr1|712130  
 AT5G44610.1  
 AT1G24340.1 Poptr1|354686  
 AT2G35500.1 Poptr1|684948  
 AT1G61340.1 Poptr1|647704,Poptr1|568300  
 AT4G21510.1,AT4G05010.1  
 AT5G39800.1,AT5G40080.1 Poptr1|651238,Poptr1|652830  
 AT4G02980.1 Poptr1|690498  
 Poptr1|572796  
 AT1G52530.1 Poptr1|597617  
 AT2G06005.1 Poptr1|668786  
 AT5G20580.1  
 AT1G48760.1 Poptr1|355550,Poptr1|574913  
 AT3G48210.1 Poptr1|575209,Poptr1|570153  
 AT1G21090.1 Poptr1|559383,Poptr1|710783  
 AT3G55000.1,AT3G55005.1 Poptr1|659801,Poptr1|563805  
 AT2G22650.1 Poptr1|578795  
 AT5G02640.1 Poptr1|576613,Poptr1|344563  
 AT3G46300.1,AT3G46310.1  
 AT1G50460.1,AT3G20040.1 Poptr1|54684,Poptr1|48954  
 AT4G37840.1 Poptr1|53450  
 AT4G29130.1,AT2G19860.1 Poptr1|689119  
 AT1G47840.1 Poptr1|715434  
 Poptr1|683774  
 AT1G50620.1 Poptr1|65423  
 AT3G20280.1  
 AT5G43070.1,AT1G47200.1 Poptr1|740523,Poptr1|644071  
 AT5G27940.1  
 AT1G29320.1 Poptr1|570229,Poptr1|575319  
 AT4G36500.1,AT2G18210.1,AT2G18200.1,AT5G66490.1,AT3G50900.1 Poptr1|655338  
 AT3G51180.1,AT5G66270.1 Poptr1|563267,Poptr1|593864  
 AT5G11450.1 Poptr1|561817

AT5G51430.1 Poptr1|554180  
 AT5G27970.1 Poptr1|56621  
     Poptr1|595471  
     Poptr1|595470  
 AT2G47290.1 Poptr1|552546  
     Poptr1|572597  
 AT1G26840.1 Poptr1|568409  
 AT3G16760.1 Poptr1|565522  
 AT3G29780.1 Poptr1|583841,Poptr1|589031,Poptr1|583838,Poptr1|676990,Poptr1|596251  
 AT4G32360.1 Poptr1|684176  
 AT1G64600.1 Poptr1|48666  
 AT2G12550.1 Poptr1|689175,Poptr1|98739  
 AT2G34440.1,AT3G66656.1 Poptr1|546588  
 AT4G09960.1 Poptr1|574215,Poptr1|740758  
 AT5G20240.1 Poptr1|651468,Poptr1|709903  
 AT2G22540.1 Poptr1|719774  
 AT5G65070.1,AT1G77080.4,AT5G10140.1,AT5G65050.1,AT5G65060.1,AT5G65080.1  
     Poptr1|680171,Poptr1|647039  
 AT3G02310.1,AT5G15800.1 Poptr1|648506,Poptr1|583854  
 AT2G45660.1 Poptr1|644372,Poptr1|730946  
 AT4G18960.1 Poptr1|568491,Poptr1|546404  
 AT5G23260.2 Poptr1|562801  
 AT2G45650.1 Poptr1|56988  
 AT3G54340.1 Poptr1|593885,Poptr1|686107  
 AT3G57230.1 Poptr1|51893  
 AT2G14210.1 Poptr1|54583,Poptr1|65369  
 AT1G26310.1,AT1G69120.1 Poptr1|659188,Poptr1|656552  
 AT1G71692.1 Poptr1|58984,Poptr1|592338  
 AT1G24260.2 Poptr1|647036,Poptr1|640054  
 AT3G57390.1 Poptr1|344137  
 AT1G47760.1  
 AT2G03710.1  
 AT4G11880.1,AT4G22950.1  
 AT5G62165.1  
 AT5G51860.1  
 AT3G58780.1,AT2G42830.2  
 AT3G61120.1  
 AT2G22630.1,AT4G37940.1  
 AT5G13790.1  
     Poptr1|654587,Poptr1|651191,Poptr1|577315,Poptr1|643871,Poptr1|577312  
     Poptr1|75533  
     Poptr1|647042  
     Poptr1|63147  
     Poptr1|564322  
     Poptr1|656551  
     Poptr1|575735  
     Poptr1|575648,Poptr1|570606  
     Poptr1|71791  
     Poptr1|356323  
     Poptr1|640053  
     Poptr1|342197  
     Poptr1|643926  
     Poptr1|347503  
     Poptr1|642184  
     Poptr1|356077  
     Poptr1|745710,Poptr1|556370,Poptr1|661810  
 AT2G19270.1 Poptr1|652859  
 AT5G66130.1 Poptr1|346350  
 AT2G46560.1 Poptr1|684311  
 AT2G41350.2 Poptr1|344122  
 AT2G21980.1  
 AT1G72320.1 Poptr1|553831  
 AT5G13470.1 Poptr1|587822,Poptr1|693183  
 AT1G09090.2 Poptr1|548137,Poptr1|575496,Poptr1|581871,Poptr1|570393  
 AT5G60010.1,AT3G45810.1 Poptr1|351882,Poptr1|58173  
 AT1G64060.1 Poptr1|691108,Poptr1|350284  
 AT4G25090.1,AT5G51060.1  
 AT5G07390.1  
 AT5G47910.1  
 AT4G11230.1  
 AT3G63140.1 Poptr1|643312,Poptr1|714967  
 AT1G76185.1,AT1G20460.1 Poptr1|652180  
     Poptr1|642848  
     Poptr1|550800  
 AT5G36120.1 Poptr1|643415,Poptr1|651643  
 ATCG00500.1 Poptr1|582021  
     Poptr1|593799  
     Poptr1|108280  
     Poptr1|558971  
 AT1G76260.1,AT1G20540.1 Poptr1|550783  
 AT1G80100.1 Poptr1|548936  
 AT5G39340.1,AT1G03430.1,AT3G29350.1 Poptr1|668001,Poptr1|703674,Poptr1|653101,Poptr1|662804

AT3G16360.1 Poptr1|578030,Poptr1|561731  
 AT3G21510.1 Poptr1|725797,Poptr1|565276,Poptr1|585666  
 AT4G04402.1  
 AT5G19710.1  
     Poptr1|740890  
     Poptr1|64076  
     Poptr1|65930,Poptr1|102632  
     Poptr1|567965  
 AT1G72240.1,AT1G22470.1 Poptr1|559063,Poptr1|347421,Poptr1|586410  
 AT1G35210.1  
 AT5G50375.1 Poptr1|733579  
 AT3G61620.1 Poptr1|700269  
 AT2G46910.1 Poptr1|552393  
 AT3G54170.1 Poptr1|348329  
 AT1G16900.1 Poptr1|728319  
     Poptr1|583031  
 AT5G61630.1,AT5G07490.1 Poptr1|63321  
     Poptr1|553927,Poptr1|589906  
 AT4G17020.2 Poptr1|713992  
 AT5G23240.1 Poptr1|549527  
 AT1G15690.1 Poptr1|578868,Poptr1|704742  
 AT1G78920.1,AT1G16780.1 Poptr1|725225  
     Poptr1|672734,Poptr1|661376  
     Poptr1|591431  
     Poptr1|75933  
     Poptr1|681427,Poptr1|591430  
     Poptr1|583449,Poptr1|699694,Poptr1|690237  
     Poptr1|595002  
     Poptr1|563427  
     Poptr1|660016  
 AT4G24330.1,AT5G49945.1 Poptr1|742492  
 AT5G46420.1 Poptr1|705089  
 AT5G20165.1 Poptr1|565050,Poptr1|658147  
 AT5G08180.1 Poptr1|564435  
 AT5G51700.1 Poptr1|575710  
 AT3G43520.1 Poptr1|653780  
 AT2G26240.1  
 AT5G22120.1 Poptr1|691322  
     Poptr1|581711  
 AT4G30720.1 Poptr1|578714  
 AT1G48270.1 Poptr1|721070  
 AT5G02850.1 Poptr1|576638  
 AT5G14930.2 Poptr1|591484,Poptr1|573546,Poptr1|591485,Poptr1|665182  
     Poptr1|65311  
 AT3G48090.1,AT3G48080.1 Poptr1|575094,Poptr1|699443  
     Poptr1|570033  
 AT3G03100.1 Poptr1|690601  
 AT3G59300.1 Poptr1|552806  
 AT5G49530.1 Poptr1|76266  
 AT2G17940.1 Poptr1|642969,Poptr1|593849,Poptr1|652056  
 AT3G51220.1  
 AT1G75720.1  
 AT2G02160.1 Poptr1|698130,Poptr1|564751  
 AT5G11620.1 Poptr1|561745  
 AT1G56590.1 Poptr1|97615,Poptr1|570692  
 AT3G56040.1 Poptr1|698486  
 AT5G56520.1 Poptr1|547586,Poptr1|555187  
 AT3G13500.1,AT1G55365.1  
     Poptr1|571205  
 AT3G48160.2 Poptr1|700898,Poptr1|570039  
 AT5G14960.1,AT3G01330.1  
 AT1G69680.1 Poptr1|571132  
 AT3G21880.1,AT4G15250.1 Poptr1|75477  
 AT2G47890.1 Poptr1|573506  
 AT5G48250.1,AT3G07650.1 Poptr1|342975  
 AT1G68190.1 Poptr1|564570  
 AT1G28050.1,AT2G33500.1 Poptr1|63183,Poptr1|350573  
 AT2G32310.1,AT1G05290.1  
 AT1G60250.1  
     Poptr1|732506  
     Poptr1|664918  
     Poptr1|569981  
     Poptr1|65015  
 AT1G24290.1 Poptr1|568187  
     Poptr1|586634  
 AT3G17611.1 Poptr1|725590  
 AT5G17620.1 Poptr1|689262,Poptr1|663223  
 AT1G32200.1 Poptr1|739947  
 AT1G33810.1 Poptr1|665696  
 AT1G50120.1 Poptr1|562828  
 AT1G64980.1 Poptr1|568882,Poptr1|665532  
 AT1G23770.1,AT1G23780.1,AT1G70360.1 Poptr1|574813

AT3G53580.1 Poptr1|717427,Poptr1|668083  
 AT1G19690.1 Poptr1|710812  
 AT5G60770.1,AT1G08090.1 Poptr1|54833,Poptr1|54832,Poptr1|579894  
 AT1G12940.1 Poptr1|662054,Poptr1|575213  
 AT5G14570.1 Poptr1|691559  
 AT3G45060.1,AT5G60780.1  
 AT1G08100.1  
 Poptr1|595094,Poptr1|584432  
 Poptr1|650503  
 Poptr1|585286  
 AT2G39090.1 Poptr1|97647,Poptr1|686996  
 AT5G18070.1 Poptr1|589964  
 AT3G51510.1 Poptr1|691931,Poptr1|569210  
 AT4G31530.1 Poptr1|64238  
 AT1G72640.1 Poptr1|693743  
 AT4G18270.1 Poptr1|568443  
 AT5G63830.1 Poptr1|350399  
 AT3G50390.1 Poptr1|558820,Poptr1|76202  
 AT3G18950.1,AT1G49450.1 Poptr1|649486,Poptr1|671384  
 AT1G24530.1 Poptr1|565969  
 AT3G51930.1 Poptr1|350825,Poptr1|547859  
 AT5G50120.1 Poptr1|661956,Poptr1|575107  
 AT2G26490.1 Poptr1|644171,Poptr1|677771  
 AT4G34380.1  
 AT1G24130.1  
 AT1G47610.1  
 Poptr1|352781  
 Poptr1|349595  
 Poptr1|106081  
 AT4G00585.1 Poptr1|552134,Poptr1|663932  
 AT3G55830.1 Poptr1|686452,Poptr1|698516  
 AT1G62250.1 Poptr1|568048  
 Poptr1|588578  
 AT5G19840.1 Poptr1|694722  
 Poptr1|551124  
 AT2G13540.1 Poptr1|722993  
 Poptr1|64235  
 AT1G50710.1 Poptr1|698972  
 Poptr1|568558  
 Poptr1|568559  
 AT1G76730.1 Poptr1|714774  
 Poptr1|551303  
 AT3G55820.1 Poptr1|563986,Poptr1|567306  
 AT5G27390.1 Poptr1|570888  
 AT1G60900.1 Poptr1|356996  
 AT4G36690.1  
 Poptr1|647996,Poptr1|670968  
 AT5G66230.1 Poptr1|593847  
 AT3G51230.1  
 Poptr1|584593,Poptr1|646230  
 AT4G13040.1 Poptr1|553203  
 AT2G31840.1 Poptr1|718112  
 AT2G27450.2 Poptr1|594963  
 AT5G64370.1 Poptr1|695809  
 AT3G21200.1 Poptr1|687434  
 Poptr1|353151  
 AT4G00800.1 Poptr1|572465  
 AT4G00790.1  
 AT2G17990.1 Poptr1|696164,Poptr1|593860  
 AT4G36105.1  
 AT5G66250.1  
 Poptr1|559708  
 AT5G53860.2 Poptr1|55954  
 Poptr1|65758,Poptr1|705560  
 Poptr1|579451  
 AT3G26590.1,AT1G12950.1,AT5G38030.1 Poptr1|354783,Poptr1|704211,Poptr1|102644  
 AT1G15160.1,AT1G15170.1,AT1G15150.1,AT1G15180.1 Poptr1|354219,Poptr1|566541  
 AT2G38510.1 Poptr1|577160  
 AT1G58340.1 Poptr1|551671  
 AT3G21690.1 Poptr1|57292  
 AT5G49130.1 Poptr1|565571  
 AT5G17700.1,AT3G03620.1 Poptr1|575782,Poptr1|571314,Poptr1|575780  
 AT5G65380.1 Poptr1|696175  
 AT3G59030.1 Poptr1|559530,Poptr1|559529,Poptr1|710748  
 AT5G52450.1,AT1G73700.1,AT2G34360.1 Poptr1|345818  
 AT2G04040.1,AT2G04070.1,AT2G04050.1,AT2G04100.1,AT2G04090.1,AT2G04080.1  
 Poptr1|553048,Poptr1|545391,Poptr1|574200,Poptr1|553050,Poptr1|553049,Poptr1|546487  
 AT4G23030.1 Poptr1|575743,Poptr1|343604,Poptr1|662403  
 AT3G23560.1,AT3G23550.1 Poptr1|568880  
 AT4G22790.1 Poptr1|60456,Poptr1|350123  
 AT1G33090.1,AT1G33100.1,AT1G33110.1,AT1G33080.1 Poptr1|571315  
 AT4G00350.1 Poptr1|347992

AT1G47530.1  
AT1G23300.1  
AT1G71140.1  
AT5G10420.1,AT5G44050.1  
AT1G66780.1,AT1G66760.2,AT1G64820.1  
AT5G52050.1  
AT4G29140.1,AT5G19700.1  
AT4G25640.1  
Poptr1|592110  
Poptr1|106831  
Poptr1|103360,Poptr1|103395  
Poptr1|566540  
Poptr1|587956  
Poptr1|560982  
Poptr1|562982  
Poptr1|698821,Poptr1|568010  
Poptr1|727425,Poptr1|544819  
Poptr1|555334  
Poptr1|571310  
Poptr1|692631  
Poptr1|716442  
Poptr1|347437  
Poptr1|746362  
Poptr1|592348,Poptr1|545392,Poptr1|104102  
Poptr1|587364,Poptr1|594010,Poptr1|568878  
Poptr1|675014  
Poptr1|568879  
Poptr1|594627  
AT4G19600.1,AT5G45190.1 Poptr1|683630,Poptr1|712730  
AT2G26430.1 Poptr1|344918  
AT1G35440.1  
AT4G19560.1  
Poptr1|562865,Poptr1|71851  
Poptr1|696432,Poptr1|692934,Poptr1|658560  
Poptr1|659826  
AT2G21870.1 Poptr1|686010,Poptr1|558631  
AT3G25980.1 Poptr1|720448  
Poptr1|726128  
AT1G53800.2 Poptr1|553835,Poptr1|356431  
AT1G15880.1 Poptr1|708590,Poptr1|554868  
AT5G03080.1 Poptr1|689372,Poptr1|667764  
AT5G04620.2 Poptr1|590158  
AT1G21350.3 Poptr1|710970  
AT3G46440.1,AT5G59290.1,AT2G28760.1 Poptr1|706197  
AT2G47650.1,AT3G62830.1 Poptr1|572692,Poptr1|342882  
AT3G53520.2 Poptr1|735401  
AT2G28755.1  
Poptr1|656070,Poptr1|724745  
Poptr1|717080  
Poptr1|653746  
AT1G59590.1,AT1G10220.1 Poptr1|644030,Poptr1|572033  
AT5G14050.1 Poptr1|52124  
Poptr1|643211  
AT4G32090.1 Poptr1|557128,Poptr1|556589  
AT3G52105.1 Poptr1|641367,Poptr1|557769  
Poptr1|576333,Poptr1|652756  
AT4G02440.1 Poptr1|552435,Poptr1|688268  
AT4G38370.1 Poptr1|648934  
Poptr1|741839  
AT5G23340.1 Poptr1|51766  
AT3G58530.1 Poptr1|653456  
AT1G80630.1 Poptr1|554851  
AT5G01720.1 Poptr1|702636,Poptr1|560962,Poptr1|577094  
AT2G36370.1  
Poptr1|352769  
Poptr1|654942  
Poptr1|571866  
AT4G21320.1 Poptr1|660497  
Poptr1|555458  
AT1G23230.1 Poptr1|564651  
Poptr1|564650  
Poptr1|564652  
AT3G59380.1 Poptr1|695776  
AT3G11950.1 Poptr1|695271  
AT4G36440.1 Poptr1|696124,Poptr1|76353  
AT2G31870.1 Poptr1|53033  
AT2G31865.2  
AT1G06730.1 Poptr1|559658,Poptr1|346880  
AT2G31530.1 Poptr1|551187  
AT5G26210.1 Poptr1|668840,Poptr1|561024,Poptr1|717823  
AT1G14510.1,AT2G02470.1 Poptr1|693770,Poptr1|596799  
AT3G11200.1,AT5G05610.1 Poptr1|656257

AT3G42790.1  
 AT5G20510.1  
     Poptr1|560917  
     Poptr1|724456  
 AT4G35510.1           Poptr1|558789,Poptr1|674261  
 AT5G66000.1  
 AT2G17540.1  
 AT1G08580.1           Poptr1|665394,Poptr1|571664  
 AT2G32180.1,AT2G32650.1           Poptr1|664772  
 AT2G32840.1,AT1G04930.1           Poptr1|583289  
 AT3G03870.2,AT5G18130.1           Poptr1|571199,Poptr1|573931  
 AT5G64510.1           Poptr1|557580  
 AT2G14835.1           Poptr1|722404,Poptr1|691761  
 AT3G62550.1           Poptr1|552521,Poptr1|572627  
 AT1G09740.1           Poptr1|684461  
 AT1G68300.1           Poptr1|698232,Poptr1|656825  
     Poptr1|570724,Poptr1|581950  
     Poptr1|559018  
     Poptr1|698234  
     Poptr1|592244,Poptr1|354183  
 AT4G24175.1           Poptr1|559845  
 AT2G46090.1           Poptr1|644509  
     Poptr1|644507  
 AT2G19340.1,AT4G29870.1           Poptr1|578998,Poptr1|560638  
 AT3G15760.1,AT1G52565.1           Poptr1|681806  
     Poptr1|578948,Poptr1|560604  
 AT3G23165.1,AT3G04943.1,AT2G14935.1,AT3G23167.1,AT3G04945.1           Poptr1|570946  
 AT5G53220.1           Poptr1|100142  
     Poptr1|677763  
 AT1G05350.1           Poptr1|733614  
     Poptr1|570256  
 AT5G22480.1,AT5G37340.2           Poptr1|556083  
 AT1G26690.1,AT1G14010.1,AT1G69460.1           Poptr1|659269,Poptr1|566996,Poptr1|720823  
 AT1G09580.1,AT1G57620.1           Poptr1|709694,Poptr1|553430  
 AT2G03290.1,AT2G03040.1  
     Poptr1|589249  
     Poptr1|99415,Poptr1|736377  
     Poptr1|595348  
     Poptr1|596376  
     Poptr1|551472  
 AT5G52030.2           Poptr1|687867  
     Poptr1|356308  
 AT4G27610.1,AT4G27620.1           Poptr1|56775,Poptr1|58933  
 AT1G75690.1           Poptr1|682014,Poptr1|73025  
 AT3G01435.1           Poptr1|673632  
 AT3G27530.1           Poptr1|49167  
 AT5G64230.1           Poptr1|701755  
 AT3G19920.1  
 AT5G20520.1           Poptr1|344359,Poptr1|688966  
 AT5G10210.1,AT5G65030.1           Poptr1|558541,Poptr1|562606  
 AT1G03230.1,AT1G03220.1           Poptr1|643329  
     Poptr1|581050,Poptr1|591123,Poptr1|97270,Poptr1|571323,Poptr1|97264,Poptr1|579301,Poptr1|706146,P  
 optr1|581052,Poptr1|97266,Poptr1|704209,Poptr1|675518,Poptr1|71834  
     Poptr1|720032,Poptr1|354945,Poptr1|560602  
     Poptr1|581834  
 AT4G12760.1           Poptr1|573160  
     Poptr1|573157  
 AT1G07970.1           Poptr1|650424  
     Poptr1|723522  
 AT1G03650.1           Poptr1|730471  
 AT5G35690.1           Poptr1|688337  
 AT5G17250.1           Poptr1|349509  
 AT3G54826.1           Poptr1|696961  
 AT5G30490.1           Poptr1|659147  
     Poptr1|659146  
 AT4G34412.1           Poptr1|744274  
     Poptr1|557382  
 AT3G25940.1           Poptr1|729518  
 AT3G62140.1           Poptr1|572529  
 AT1G08760.1           Poptr1|594552,Poptr1|562209  
 AT1G23790.1,AT1G70340.1           Poptr1|345558  
 AT3G19610.1           Poptr1|65282  
 AT3G14170.1           Poptr1|646024  
     Poptr1|723380  
     Poptr1|658364  
     Poptr1|584138  
 AT5G48470.1           Poptr1|553249  
 AT2G03800.1           Poptr1|688437  
 AT5G09230.1           Poptr1|51687  
     Poptr1|587260  
 AT5G41650.1           Poptr1|693399  
 AT1G64185.1

AT5G11280.1 Poptr1|561870  
 Poptr1|349483  
 Poptr1|585370  
 AT4G36830.1 Poptr1|591839,Poptr1|76241  
 AT1G75000.1  
 AT5G16100.1 Poptr1|352626  
 AT1G79070.1 Poptr1|655951,Poptr1|569194  
 AT5G52220.1 Poptr1|575789,Poptr1|570483  
 AT5G38720.1 Poptr1|580741,Poptr1|556184  
 AT5G47660.1 Poptr1|560102,Poptr1|575877  
 AT1G76880.1 Poptr1|551322,Poptr1|72589,Poptr1|72590  
 AT5G03680.1,AT3G10000.1 Poptr1|660195,Poptr1|655813  
 AT5G28300.1 Poptr1|571019  
 AT1G33240.1 Poptr1|65825,Poptr1|727247  
 AT1G76890.2  
 Poptr1|577988,Poptr1|577994,Poptr1|549871,Poptr1|561592  
 Poptr1|585937  
 AT2G37970.1 Poptr1|735695  
 AT5G12260.1 Poptr1|64604,Poptr1|557721  
 Poptr1|100756  
 AT5G47560.1 Poptr1|716925  
 AT4G09010.1 Poptr1|716457  
 AT5G06620.1 Poptr1|352204  
 AT4G33410.1 Poptr1|734197,Poptr1|570443  
 AT1G20310.1,AT1G76070.1 Poptr1|73097,Poptr1|550831  
 Poptr1|593783  
 AT4G27490.1 Poptr1|650481,Poptr1|595078  
 AT1G60080.1 Poptr1|576355,Poptr1|560507  
 AT3G07750.1 Poptr1|688348  
 AT1G04940.1 Poptr1|704667  
 AT2G45330.1,AT5G23600.1 Poptr1|551766  
 Poptr1|663425  
 ATMG00650.1 Poptr1|102022  
 ATCG01070.1  
 AT1G66680.1 Poptr1|744154  
 AT3G56120.1 Poptr1|702117  
 AT1G54070.1 Poptr1|584142,Poptr1|597036,Poptr1|693661  
 AT1G28330.3 Poptr1|647948  
 AT2G33830.2,AT5G44300.1  
 AT1G20810.1 Poptr1|559982  
 AT2G42880.1 Poptr1|684559,Poptr1|72682  
 AT4G19110.2,AT5G45430.1 Poptr1|575939,Poptr1|555115  
 AT4G01370.1 Poptr1|552199,Poptr1|688162  
 AT2G18170.1 Poptr1|696121,Poptr1|346392  
 AT1G53510.1,AT3G14720.1 Poptr1|704925,Poptr1|684064  
 AT3G45640.1 Poptr1|697479,Poptr1|49082  
 AT5G19010.1 Poptr1|725752,Poptr1|696262  
 AT3G18040.1 Poptr1|355504,Poptr1|688447  
 AT4G13020.3 Poptr1|711546  
 AT2G43790.1 Poptr1|688887,Poptr1|718188  
 AT1G10210.1,AT1G59580.1 Poptr1|684630,Poptr1|52174  
 AT1G76540.1 Poptr1|684692,Poptr1|694928  
 AT1G01560.1  
 AT2G46070.1  
 AT4G36450.1  
 AT4G01595.1  
 AT1G73670.1,AT1G18150.1  
 AT3G59790.1  
 Poptr1|547751  
 Poptr1|554493  
 Poptr1|350269,Poptr1|48720  
 Poptr1|726880  
 Poptr1|104536  
 AT1G63370.1,AT1G62600.1,AT1G62620.1 Poptr1|581236  
 AT5G61290.1,AT5G07800.1 Poptr1|699468  
 AT1G12200.1,AT1G62580.1,AT1G12140.1,AT1G62570.1,AT1G63340.1  
 AT1G62540.1,AT1G12130.1,AT1G12160.1,AT1G65860.1,AT1G62560.1  
 AT1G63390.1  
 Poptr1|554206  
 Poptr1|569953  
 AT1G68100.1 Poptr1|720768  
 Poptr1|658676  
 AT2G34470.2 Poptr1|553180,Poptr1|645427  
 AT5G65860.1 Poptr1|689599  
 AT4G04870.1 Poptr1|544836  
 AT5G42640.1,AT2G18490.1,AT5G22990.1,AT2G15740.1,AT4G26030.1 Poptr1|351060  
 AT1G66330.1 Poptr1|692139  
 AT1G21760.1 Poptr1|692730,Poptr1|559244  
 AT3G58600.1 Poptr1|574342,Poptr1|592187  
 AT1G03900.1 Poptr1|715203  
 Poptr1|682003  
 AT1G67325.1 Poptr1|640028,Poptr1|554787



AT3G50860.1 Poptr1|679228,Poptr1|686086  
 AT2G17380.1,AT4G35410.2 Poptr1|731011,Poptr1|699509  
 AT2G19790.1 Poptr1|717005  
 AT1G47830.1 Poptr1|550891,Poptr1|652060  
 Poptr1|745178  
 AT1G03030.1 Poptr1|715098  
 Poptr1|643208  
 AT3G53900.2 Poptr1|717184  
 AT4G20410.1 Poptr1|569307,Poptr1|705063  
 AT3G07790.1 Poptr1|552692,Poptr1|573072  
 AT1G05590.1 Poptr1|583312,Poptr1|98555  
 AT2G25930.1 Poptr1|685546,Poptr1|553541  
 AT3G21320.1  
 AT1G18060.1 Poptr1|569771  
 AT3G09580.1 Poptr1|549551  
 AT1G08620.1 Poptr1|699857  
 AT5G46910.1 Poptr1|590053,Poptr1|712170  
 AT4G20400.1 Poptr1|569305,Poptr1|586860  
 AT1G63490.1 Poptr1|712503  
 AT2G34880.1,AT1G30810.1  
 Poptr1|665300  
 Poptr1|551028  
 Poptr1|738239  
 Poptr1|587522  
 AT3G51020.1,AT5G66370.1 Poptr1|346596  
 Poptr1|558803  
 AT3G58010.1,AT2G42130.3 Poptr1|561256,Poptr1|57951  
 AT3G15630.1,AT1G52720.1 Poptr1|709580,Poptr1|645881  
 AT2G30695.1 Poptr1|704561  
 Poptr1|582765  
 AT4G31790.1 Poptr1|709838  
 AT1G01160.1,AT4G00850.1 Poptr1|644637,Poptr1|572448  
 AT1G16630.1,AT2G16270.1 Poptr1|550042  
 AT5G63040.1 Poptr1|728473  
 AT1G48460.1 Poptr1|677769  
 AT1G64385.1 Poptr1|548347,Poptr1|646745  
 AT1G60600.1 Poptr1|668354  
 Poptr1|595727  
 AT4G16580.1 Poptr1|591821  
 AT2G30170.1 Poptr1|691531  
 AT5G66720.1 Poptr1|593962  
 AT4G33500.1  
 Poptr1|559043,Poptr1|584901,Poptr1|568120,Poptr1|591598,Poptr1|579144,Poptr1|107725,Poptr1|99462,  
 Poptr1|558174  
 Poptr1|63404  
 Poptr1|655270  
 Poptr1|550343  
 AT3G61540.1 Poptr1|348019  
 AT3G50610.1 Poptr1|76132,Poptr1|579766  
 Poptr1|558854  
 AT5G55540.1 Poptr1|65450  
 Poptr1|568531  
 Poptr1|568530  
 AT1G08750.1 Poptr1|586803  
 AT2G01770.1 Poptr1|726760  
 Poptr1|585779  
 AT1G20890.1,AT1G76480.1 Poptr1|561718  
 AT3G01640.1 Poptr1|549568  
 AT5G14470.1  
 AT2G46890.1 Poptr1|700338  
 AT3G43300.1 Poptr1|695153  
 AT4G38200.1 Poptr1|595030  
 AT4G35380.1  
 AT3G60860.1,AT1G01960.1  
 Poptr1|344571  
 AT3G47450.1 Poptr1|590178  
 AT4G28830.1 Poptr1|737629  
 Poptr1|584051  
 AT5G52880.1 Poptr1|355173  
 AT4G01650.1 Poptr1|644716,Poptr1|572507  
 AT5G42070.1 Poptr1|646769,Poptr1|640334  
 AT5G13070.1 Poptr1|62977  
 AT4G38495.1 Poptr1|577082  
 Poptr1|577080  
 AT4G24900.1 Poptr1|570261  
 Poptr1|575362,Poptr1|662157  
 AT5G37130.1,AT5G17270.1 Poptr1|714236  
 AT4G02740.1,AT4G02733.1 Poptr1|551163,Poptr1|651770  
 AT4G02760.1  
 AT1G12650.1 Poptr1|640545  
 AT1G72020.1 Poptr1|678126,Poptr1|665745  
 AT2G01350.1 Poptr1|686308

Poptr1|566508  
AT2G21820.1 Poptr1|659386  
Poptr1|564142  
AT5G39785.2 Poptr1|668564,Poptr1|61083  
AT1G69610.1  
Poptr1|99397  
AT3G06200.1 Poptr1|565307,Poptr1|54933  
AT1G22250.1,AT1G78170.1 Poptr1|643762,Poptr1|651288  
AT4G08910.1  
AT5G66290.1 Poptr1|703387,Poptr1|719706  
AT5G52100.1 Poptr1|701158  
Poptr1|570529  
AT2G41530.1 Poptr1|652670  
AT5G10780.1 Poptr1|694954,Poptr1|689074  
AT1G19130.1 Poptr1|689352  
AT2G21180.1 Poptr1|713198,Poptr1|697215  
Poptr1|554810  
AT2G40430.1 Poptr1|696754  
AT3G28970.1 Poptr1|694114,Poptr1|577654  
AT1G10650.1,AT1G60610.1 Poptr1|687062  
AT1G45976.1 Poptr1|583226,Poptr1|677871,Poptr1|551842  
AT1G32740.1 Poptr1|580140,Poptr1|356556  
AT4G35070.1 Poptr1|556646,Poptr1|559861  
AT4G17680.1,AT5G47050.1  
Poptr1|355899  
Poptr1|346665  
AT2G31040.1 Poptr1|572844  
AT2G23890.1 Poptr1|737908  
Poptr1|352397  
Poptr1|669518  
AT5G24610.1,AT3G49550.1 Poptr1|661641,Poptr1|688404  
AT4G30580.1 Poptr1|352346  
AT1G08550.1 Poptr1|663034  
Poptr1|573878  
AT5G15170.1 Poptr1|694056  
AT5G20650.1 Poptr1|739168  
Poptr1|653794  
AT4G17420.1,AT5G47420.1 Poptr1|689448,Poptr1|646130  
AT1G36550.1  
Poptr1|100086,Poptr1|63028,Poptr1|355076,Poptr1|349259,Poptr1|100937,Poptr1|105280,Poptr1|99506,  
Poptr1|577861,Poptr1|103571,Poptr1|99492,Poptr1|99097,Poptr1|103708  
Poptr1|99934,Poptr1|102318,Poptr1|349406,Poptr1|103896,Poptr1|576751,Poptr1|72072,Poptr1|102691,  
Poptr1|349258  
Poptr1|104521,Poptr1|72062  
AT4G20150.1 Poptr1|554622,Poptr1|548173  
AT2G06025.1 Poptr1|589283  
AT1G67620.1 Poptr1|696630  
Poptr1|566833  
AT3G53970.1 Poptr1|576861  
AT1G48530.1  
AT3G18240.1,AT4G21460.1 Poptr1|574935  
AT1G73770.1  
Poptr1|699529  
AT3G18790.1 Poptr1|597081  
AT5G45360.1 Poptr1|596870  
AT1G01860.1 Poptr1|572185  
AT5G10700.1 Poptr1|669240,Poptr1|680611  
AT5G39530.1,AT5G39520.1 Poptr1|688953  
AT1G71480.1 Poptr1|738750  
Poptr1|592358  
AT3G05625.1 Poptr1|699711  
AT1G12230.1 Poptr1|581230  
AT5G51170.1 Poptr1|575515  
ATCG01050.1 Poptr1|705653  
ATMG00580.1  
Poptr1|589106  
AT2G25830.1 Poptr1|561748  
AT3G61800.1 Poptr1|552280,Poptr1|57092  
AT4G39690.1 Poptr1|558579,Poptr1|75769  
AT3G11330.1,AT5G05850.1 Poptr1|700962  
AT3G26500.1,AT1G12970.1 Poptr1|566013  
AT4G35470.1 Poptr1|558753,Poptr1|53282  
AT1G69545.1  
Poptr1|588659,Poptr1|595624,Poptr1|585925,Poptr1|349971,Poptr1|588663,Poptr1|586615,Poptr1|58211  
0  
AT4G29880.1,AT2G19330.1 Poptr1|578999,Poptr1|351644  
AT2G17440.1  
AT5G45510.1  
AT4G26050.1  
Poptr1|356605,Poptr1|703999  
Poptr1|65292,Poptr1|106524  
Poptr1|348847,Poptr1|590961

AT5G33280.1 Poptr1|690389  
AT5G49890.1 Poptr1|583472,Poptr1|60067  
AT5G40890.1,AT3G27170.1 Poptr1|691638  
Poptr1|573557  
Poptr1|585127  
AT2G47485.1,AT3G62650.1 Poptr1|700417,Poptr1|348306  
ATCG00730.1 Poptr1|588640  
Poptr1|571693  
Poptr1|589041  
AT2G07727.1,ATMG00220.1 Poptr1|593309,Poptr1|592419,Poptr1|591303  
Poptr1|587251  
AT3G48380.1 Poptr1|733487  
Poptr1|666573  
AT1G19020.1 Poptr1|666406,Poptr1|570042  
AT3G48180.1  
AT5G18200.1 Poptr1|689241,Poptr1|561702  
AT5G15700.1 Poptr1|345225,Poptr1|746128  
AT2G24120.1 Poptr1|578710,Poptr1|352371  
Poptr1|102823,Poptr1|587440,Poptr1|583900  
Poptr1|593565,Poptr1|97026  
Poptr1|597018,Poptr1|583254  
Poptr1|580715  
Poptr1|100509,Poptr1|593369  
Poptr1|100523  
Poptr1|579527,Poptr1|101047  
Poptr1|100518  
Poptr1|103412  
AT3G51980.1 Poptr1|548146  
AT4G24680.1 Poptr1|575197,Poptr1|570158  
AT5G13220.1 Poptr1|712551,Poptr1|548076  
AT1G48050.1 Poptr1|700157,Poptr1|347864  
AT1G71350.1 Poptr1|688059  
Poptr1|97246  
Poptr1|571601  
AT1G34780.1,AT4G08930.1 Poptr1|551583,Poptr1|716495  
AT5G18120.1,AT3G03860.1 Poptr1|699882,Poptr1|573932  
AT1G49975.1 Poptr1|550022  
Poptr1|557532  
AT5G40460.1 Poptr1|577483  
AT3G27630.1  
Poptr1|565168,Poptr1|566023  
AT3G13480.1 Poptr1|555185,Poptr1|103196,Poptr1|62681  
AT1G55475.1  
AT3G01420.1 Poptr1|696625  
AT1G73680.1 Poptr1|355513  
AT3G01910.1 Poptr1|683949  
AT3G53630.1 Poptr1|652944  
AT5G45590.1 Poptr1|702968,Poptr1|693558  
AT5G04520.1 Poptr1|687414  
AT5G06260.1 Poptr1|685610  
AT4G34070.1  
AT5G08540.1 Poptr1|567751  
Poptr1|567752  
AT3G13130.1 Poptr1|550196  
AT2G04515.1,AT2G04495.1 Poptr1|573100  
Poptr1|701228  
AT4G38440.1 Poptr1|557035  
AT2G34630.2 Poptr1|739257,Poptr1|566762  
AT1G78510.1,AT1G17050.1 Poptr1|550339,Poptr1|550337  
Poptr1|588276  
Poptr1|99479  
Poptr1|584924,Poptr1|595796  
Poptr1|590802  
Poptr1|588271,Poptr1|586699,Poptr1|99471  
Poptr1|586698  
AT2G17695.1 Poptr1|741193  
AT4G20910.1,AT4G20920.1 Poptr1|550609,Poptr1|98146  
AT5G67490.1 Poptr1|732920  
AT1G56345.1 Poptr1|570720  
AT2G44520.1 Poptr1|711442  
AT3G09250.1 Poptr1|560849,Poptr1|667937  
AT1G73180.1 Poptr1|582759  
AT3G05510.1 Poptr1|744530  
AT4G29520.1 Poptr1|582950  
AT5G50960.1 Poptr1|706890  
AT1G11650.2 Poptr1|713522,Poptr1|727110  
AT1G47500.1,AT1G47490.1 Poptr1|697315,Poptr1|677802,Poptr1|347675  
AT5G19350.1 Poptr1|650044  
AT5G54900.1,AT4G27000.1  
AT1G49600.1,AT3G19130.1  
Poptr1|64489  
AT3G11620.1 Poptr1|735278

AT4G23910.1,AT4G10970.1 Poptr1|640353,Poptr1|693373  
AT5G45420.1 Poptr1|676503  
AT5G02220.1 Poptr1|563918,Poptr1|567402  
Poptr1|576810  
Poptr1|650242  
AT5G42970.1 Poptr1|665031  
AT4G23895.1 Poptr1|646756,Poptr1|640356  
AT5G64040.1 Poptr1|685955,Poptr1|715775  
AT3G60810.1 Poptr1|711144  
AT5G65685.1 Poptr1|717979  
AT1G11720.1 Poptr1|544794  
AT4G18240.1 Poptr1|64727  
Poptr1|673480  
Poptr1|591049  
Poptr1|746053  
Poptr1|678879  
AT5G20660.1 Poptr1|353384  
AT1G29070.1 Poptr1|728214  
AT4G38110.1 Poptr1|708002  
AT4G37830.1 Poptr1|655509  
AT5G38890.1 Poptr1|663010  
Poptr1|680752  
AT5G37360.1 Poptr1|573763,Poptr1|571130  
Poptr1|596167  
AT3G28670.1 Poptr1|342537  
AT4G01320.1 Poptr1|644503,Poptr1|47638  
AT2G26470.1 Poptr1|553242  
AT1G80770.1 Poptr1|551933  
AT1G34220.1 Poptr1|592195  
AT4G35730.1 Poptr1|554016  
AT1G25420.1 Poptr1|678744  
AT1G13340.1 Poptr1|698250  
AT4G29440.1,AT2G19710.1  
Poptr1|658881  
Poptr1|696559  
Poptr1|580788,Poptr1|545332  
AT2G31440.1 Poptr1|718353  
AT1G17870.1 Poptr1|642120  
Poptr1|642119  
AT3G12030.1,AT5G06660.1 Poptr1|667506  
AT2G36305.1 Poptr1|652951  
AT3G13226.1 Poptr1|65956  
AT4G29170.1 Poptr1|745189  
AT1G32520.1 Poptr1|580094  
Poptr1|676529  
AT3G20430.1 Poptr1|352720  
Poptr1|577884  
AT4G19160.2 Poptr1|691311,Poptr1|740903  
AT5G09240.2,AT5G09250.1 Poptr1|654688  
Poptr1|650644  
AT5G62620.1,AT1G74800.1 Poptr1|570013,Poptr1|688472  
AT4G21060.1 Poptr1|351193,Poptr1|57857  
AT1G26810.1 Poptr1|567039,Poptr1|353845  
AT3G06440.1  
Poptr1|687067  
Poptr1|596591  
AT3G26380.1 Poptr1|696321,Poptr1|697967  
Poptr1|578859  
AT3G51130.1 Poptr1|593877,Poptr1|76395  
AT1G77140.1 Poptr1|347156,Poptr1|559337  
AT2G26920.1 Poptr1|63815,Poptr1|54784  
AT5G12120.1  
Poptr1|555103,Poptr1|547775  
AT1G09230.1 Poptr1|729948,Poptr1|573888  
AT5G41150.1 Poptr1|589928  
AT1G26660.1 Poptr1|656478  
Poptr1|566982  
AT1G62960.1 Poptr1|554269  
AT4G11280.1 Poptr1|350274,Poptr1|640442  
AT3G61510.1 Poptr1|684328  
AT4G26200.1 Poptr1|98306,Poptr1|344379  
AT5G51690.1 Poptr1|575708  
AT1G01480.1  
AT5G28360.1  
Poptr1|104603  
Poptr1|570563  
AT5G49970.1 Poptr1|711107  
Poptr1|651228  
AT1G22750.2 Poptr1|559438,Poptr1|710725  
AT1G13870.1 Poptr1|345150  
AT3G56830.1 Poptr1|347841  
AT1G65420.1 Poptr1|564111

AT3G49080.1 Poptr1|662307  
 AT3G17465.1 Poptr1|565468  
 AT1G80500.1 Poptr1|746829  
 AT5G01230.1 Poptr1|58963  
 AT2G25950.1 Poptr1|736859  
 AT3G19820.1 Poptr1|345107,Poptr1|564011  
 AT1G13750.1 Poptr1|564300,Poptr1|698368  
 AT1G13900.1,AT2G03450.1 Poptr1|566952  
 AT4G24890.1,AT5G50400.1 Poptr1|570253  
 AT1G13760.1  
 Poptr1|564277  
 Poptr1|554997,Poptr1|639863  
 AT2G47960.1 Poptr1|580877,Poptr1|545323  
 ATCG00720.1 Poptr1|568839  
 Poptr1|581329,Poptr1|595930  
 AT5G66815.1 Poptr1|580832,Poptr1|71988,Poptr1|562992  
 AT2G23440.1  
 Poptr1|591897  
 AT3G55160.1 Poptr1|545746  
 AT2G30350.2 Poptr1|571891  
 Poptr1|580699  
 AT1G67690.1 Poptr1|565929  
 AT2G07340.1 Poptr1|682270  
 AT4G16710.1 Poptr1|570876,Poptr1|59983  
 AT4G17960.1 Poptr1|356611,Poptr1|580087  
 AT5G46620.1  
 AT2G19350.1,AT4G29850.1 Poptr1|695495,Poptr1|689192  
 AT1G64510.1 Poptr1|709127  
 AT3G16270.1 Poptr1|705785  
 AT1G78590.1 Poptr1|99440  
 Poptr1|675419  
 Poptr1|589792  
 AT2G20690.1 Poptr1|670581,Poptr1|582707  
 Poptr1|587130  
 AT5G47580.1 Poptr1|581254,Poptr1|554192  
 AT4G17250.1  
 Poptr1|581253  
 Poptr1|554193  
 AT5G02160.1 Poptr1|652999  
 AT3G06530.1 Poptr1|588769  
 AT2G19560.1 Poptr1|685579  
 AT1G02680.1 Poptr1|572633  
 AT3G54900.1 Poptr1|664586  
 AT2G38270.1 Poptr1|735883  
 AT4G04950.1 Poptr1|580891,Poptr1|555811  
 AT3G15660.1 Poptr1|712481  
 AT4G32580.1  
 Poptr1|675640  
 AT1G48175.1 Poptr1|560664  
 AT2G37330.1 Poptr1|688775,Poptr1|561531  
 AT3G55250.1 Poptr1|688921  
 Poptr1|102062  
 AT5G01630.1,AT4G00020.1 Poptr1|573323  
 AT4G00010.1  
 Poptr1|577057  
 AT4G00026.1 Poptr1|591721,Poptr1|692460  
 AT4G01040.1 Poptr1|572376  
 Poptr1|348064  
 AT1G07210.1 Poptr1|585168  
 AT3G63440.1 Poptr1|587825,Poptr1|350818,Poptr1|576242  
 AT5G21482.1 Poptr1|561588  
 AT5G56970.1 Poptr1|561098  
 AT1G75450.1 Poptr1|550963,Poptr1|559779  
 AT2G41510.1  
 AT2G19500.1,AT4G29740.2  
 Poptr1|76017  
 Poptr1|559778  
 AT1G73060.1 Poptr1|587205  
 Poptr1|554888  
 AT5G48790.1 Poptr1|554104  
 AT1G48170.1 Poptr1|682403  
 AT5G51740.1 Poptr1|570554  
 Poptr1|575719  
 AT5G47570.1 Poptr1|704267  
 AT1G76060.1 Poptr1|550832  
 AT3G26570.1 Poptr1|354776  
 AT4G17760.1 Poptr1|676575  
 AT3G06840.1 Poptr1|565559,Poptr1|565560,Poptr1|703723  
 AT5G49170.1  
 AT3G11680.1 Poptr1|64177,Poptr1|352144  
 AT5G46610.1,AT4G17970.1,AT5G46600.1 Poptr1|589990  
 AT4G17585.1

Poptr1|104460  
Poptr1|559539,Poptr1|551190  
AT4G24620.1 Poptr1|709870  
AT1G73740.1 Poptr1|569791  
AT3G45100.1 Poptr1|58235  
Poptr1|560968  
AT4G32750.1 Poptr1|578102,Poptr1|561777  
AT2G02510.1,AT1G14450.1 Poptr1|596794  
AT1G34630.1 Poptr1|692660  
Poptr1|559109  
AT5G14090.1 Poptr1|548048,Poptr1|64978  
AT3G27025.1  
Poptr1|693253  
AT5G19300.1 Poptr1|698099,Poptr1|719838  
AT3G10220.1 Poptr1|560410  
Poptr1|576185  
AT5G11680.1 Poptr1|683614,Poptr1|684815  
AT5G59820.1,AT3G46070.1,AT3G46080.1,AT3G46090.1,AT2G28710.1  
Poptr1|706232,Poptr1|563857,Poptr1|558107,Poptr1|659738  
AT2G28200.1 Poptr1|576790,Poptr1|563672,Poptr1|650539,Poptr1|659946,Poptr1|745968  
AT3G53600.1,AT2G37430.1  
AT3G10470.1,AT5G04390.1  
AT5G03510.1  
AT3G05410.1 Poptr1|97731  
Poptr1|570811  
AT5G54290.1 Poptr1|704444  
Poptr1|589762  
AT5G19540.1 Poptr1|578466  
Poptr1|584013  
AT1G67840.1 Poptr1|687048  
Poptr1|726214  
AT5G41880.1 Poptr1|711657  
AT1G62780.1 Poptr1|581217  
AT2G01640.1 Poptr1|649609  
Poptr1|642025  
AT4G20070.1 Poptr1|702844  
AT5G49570.1 Poptr1|56636  
AT4G25140.1,AT5G51210.1 Poptr1|640234,Poptr1|646862  
AT3G01570.1,AT5G40420.1,AT3G27660.1 Poptr1|641631,Poptr1|701785  
AT2G25890.1 Poptr1|668773,Poptr1|670493,Poptr1|653963  
AT1G48990.1,AT3G18570.1 Poptr1|569851  
AT5G07550.1,AT5G07560.1  
AT5G07600.1,AT5G61610.1  
Poptr1|575219,Poptr1|570116  
AT3G61080.1 Poptr1|347914  
AT4G02405.1 Poptr1|644764  
AT3G46220.1 Poptr1|49038  
AT1G31410.1 Poptr1|554142  
Poptr1|590137  
AT2G25735.1 Poptr1|585727,Poptr1|578122,Poptr1|63790,Poptr1|352829  
AT5G07960.1 Poptr1|569929,Poptr1|683295  
AT4G03090.1 Poptr1|552638,Poptr1|572773  
Poptr1|572772  
AT5G39250.1 Poptr1|577740,Poptr1|596221,Poptr1|648543  
AT1G16445.1 Poptr1|562845  
AT5G08240.1,AT5G23160.1 Poptr1|562815,Poptr1|558689  
Poptr1|582069,Poptr1|571819  
AT2G48070.1 Poptr1|731966  
AT3G15160.1 Poptr1|687620  
Poptr1|571505  
AT5G12930.1 Poptr1|62987,Poptr1|350778,Poptr1|554945  
AT5G39590.1 Poptr1|346719,Poptr1|694829  
AT5G16060.1 Poptr1|580783,Poptr1|585010  
AT5G50110.1 Poptr1|570046  
Poptr1|575108  
AT5G53310.1 Poptr1|729037,Poptr1|586578  
AT5G13110.1,AT1G24280.1 Poptr1|708767,Poptr1|554745  
AT5G40760.1,AT3G27300.1 Poptr1|641721,Poptr1|736144  
AT1G09420.1 Poptr1|699679  
AT5G35790.1  
Poptr1|590626  
Poptr1|678750  
Poptr1|97585  
AT2G46550.1 Poptr1|644599,Poptr1|700299  
AT1G01240.1  
AT1G73240.1 Poptr1|48462  
Poptr1|555273  
AT5G48020.1 Poptr1|691480  
AT3G04560.1 Poptr1|687979  
AT4G08540.1 Poptr1|684489  
AT1G77890.1  
AT5G66820.1 Poptr1|562994,Poptr1|558853

AT1G20410.1 Poptr1|559906  
AT2G05320.1 Poptr1|664884  
AT2G24860.1 Poptr1|562018,Poptr1|702075  
AT3G04480.1 Poptr1|571104,Poptr1|573724  
AT3G02550.1 Poptr1|97098,Poptr1|546472  
AT3G49940.1,AT5G67420.1 Poptr1|553956,Poptr1|716322  
AT1G68510.1 Poptr1|354173,Poptr1|355573,Poptr1|566622  
AT1G67100.1  
AT4G37540.1  
Poptr1|642084  
AT3G27050.1 Poptr1|641818  
AT2G21370.1 Poptr1|54430  
Poptr1|583579  
AT2G17972.1 Poptr1|593855  
AT1G76450.1 Poptr1|715685  
AT2G29530.1 Poptr1|706076,Poptr1|650203  
AT3G15840.1 Poptr1|705702  
AT5G51330.1 Poptr1|554158  
Poptr1|676689  
AT4G39440.1 Poptr1|71747  
Poptr1|654907  
AT4G18460.1 Poptr1|674320  
AT5G42850.1 Poptr1|548701  
AT5G12080.1,AT5G19520.1 Poptr1|352620  
AT1G78610.1 Poptr1|55912  
AT1G49260.1,AT3G14810.1,AT2G17000.1  
AT2G17010.1  
AT1G53470.1  
Poptr1|571352,Poptr1|579749,Poptr1|589266,Poptr1|571351  
Poptr1|663229,Poptr1|571350  
Poptr1|546736  
Poptr1|559897  
AT5G10620.1 Poptr1|583190  
AT2G35470.1 Poptr1|693573,Poptr1|590047  
AT5G08170.1 Poptr1|742431  
AT5G40530.2 Poptr1|64812  
AT1G72560.1 Poptr1|745795,Poptr1|343299  
AT3G13440.1 Poptr1|554632  
AT5G17610.1 Poptr1|571353,Poptr1|571354  
AT3G59390.1 Poptr1|588685  
AT4G00560.1 Poptr1|572209  
AT5G36950.1 Poptr1|564138  
AT5G40200.1 Poptr1|575127,Poptr1|728836  
AT3G16550.1,AT3G16540.1,AT1G65630.1,AT1G65640.1  
AT1G54700.1,AT5G40560.1  
AT5G54745.1,AT1G51150.1  
AT4G21105.1 Poptr1|691938,Poptr1|569319  
AT1G49820.1 Poptr1|65237,Poptr1|722323  
AT2G03420.1 Poptr1|724072  
AT1G02870.1 Poptr1|572702  
AT5G32470.1 Poptr1|571127,Poptr1|573759  
AT2G21070.1 Poptr1|648758  
AT5G48390.1 Poptr1|573180  
AT3G06610.1 Poptr1|564385,Poptr1|698320  
AT2G37680.1 Poptr1|576816  
Poptr1|586100  
AT4G10265.1,AT4G10270.1  
Poptr1|665998,Poptr1|590916,Poptr1|591535,Poptr1|571804,Poptr1|663547,Poptr1|666003,Poptr1|67723  
6,Poptr1|574589,Poptr1|665999,Poptr1|747210,Poptr1|574594,Poptr1|666000,Poptr1|676899,Poptr1|574586  
Poptr1|571803  
Poptr1|582079,Poptr1|568978  
Poptr1|571807  
Poptr1|666002  
Poptr1|744649  
AT1G11760.1 Poptr1|712931  
AT5G10810.1 Poptr1|717161,Poptr1|737390  
AT3G17900.1 Poptr1|355058  
Poptr1|354857  
AT5G04910.1 Poptr1|563501  
AT1G02180.1 Poptr1|551943,Poptr1|677710  
Poptr1|695130  
AT3G49100.1 Poptr1|715108,Poptr1|692879  
AT5G51130.1 Poptr1|578503  
AT3G47650.1 Poptr1|672447  
Poptr1|654134,Poptr1|702010  
AT4G27640.1 Poptr1|696720,Poptr1|698416  
AT5G19820.1 Poptr1|48434,Poptr1|555202  
Poptr1|591033,Poptr1|562668,Poptr1|75799,Poptr1|556016  
Poptr1|594185,Poptr1|573936  
Poptr1|545480,Poptr1|348714  
Poptr1|545886  
Poptr1|556017

AT1G16590.1 Poptr1|674730  
Poptr1|569172  
Poptr1|569173  
AT4G23860.1 Poptr1|548339,Poptr1|712282  
AT2G03510.1 Poptr1|724048  
Poptr1|656518  
AT3G10405.1 Poptr1|353341  
AT3G58830.1 Poptr1|72676,Poptr1|551255  
AT4G33925.1 Poptr1|649657  
AT5G16940.1 Poptr1|645200,Poptr1|552923,Poptr1|645201  
AT4G24090.1 Poptr1|63359  
AT2G30942.1 Poptr1|639579  
AT3G04120.1,AT1G13440.1 Poptr1|687033,Poptr1|706904  
AT1G79530.1,AT1G16300.1 Poptr1|686413,Poptr1|724220  
Poptr1|575307,Poptr1|570215  
Poptr1|657409  
AT3G29010.1 Poptr1|577664  
AT1G53120.1 Poptr1|728397  
AT2G44870.1 Poptr1|694046  
AT2G41120.1 Poptr1|351307  
AT1G44920.1 Poptr1|644003  
AT3G05070.1 Poptr1|694006  
Poptr1|585887  
AT4G34700.1 Poptr1|648697,Poptr1|649314  
AT3G54360.1 Poptr1|647379,Poptr1|708415  
AT5G51220.1 Poptr1|675654  
AT1G19800.1 Poptr1|348887  
AT5G40670.1 Poptr1|577487  
Poptr1|577486  
Poptr1|577488  
AT3G58490.1 Poptr1|695267,Poptr1|576416  
AT1G06590.1 Poptr1|693859  
AT2G35790.1 Poptr1|563771,Poptr1|724922  
Poptr1|724910  
AT1G31170.1 Poptr1|570616  
Poptr1|575641  
AT2G20490.1 Poptr1|651920,Poptr1|643131  
AT4G05030.1 Poptr1|560064,Poptr1|560065,Poptr1|582325  
AT5G48290.1,AT3G07600.1 Poptr1|596910,Poptr1|573139,Poptr1|705606,Poptr1|697571,Poptr1|596909  
Poptr1|560066,Poptr1|642662  
AT4G21150.1 Poptr1|692906,Poptr1|694769  
AT5G27560.1 Poptr1|570826  
AT1G53710.1 Poptr1|676351  
AT1G66510.1 Poptr1|553019  
AT2G47770.1 Poptr1|572713,Poptr1|552424,Poptr1|705389  
Poptr1|565719  
AT5G11810.1 Poptr1|352689  
Poptr1|668808  
AT4G38240.1 Poptr1|54248  
Poptr1|679960  
Poptr1|679961  
AT1G68750.1 Poptr1|564468  
AT3G14940.1,AT1G53310.1 Poptr1|687583,Poptr1|552645,Poptr1|745223  
AT2G42600.1  
AT3G42628.1  
Poptr1|658961  
Poptr1|564469  
Poptr1|658962  
Poptr1|582814  
Poptr1|572845  
AT5G22460.1 Poptr1|679941  
AT1G74280.1,AT3G48410.1,AT1G74290.1,AT1G74300.1,AT2G36290.1  
Poptr1|655780,Poptr1|686551,Poptr1|655776,Poptr1|687456  
AT3G03240.1,AT3G03230.1  
AT3G54240.1  
AT2G34940.1,AT1G30900.1 Poptr1|63281,Poptr1|693319  
AT2G14740.1,AT2G14720.1 Poptr1|707426,Poptr1|697386  
AT3G52850.1 Poptr1|344343,Poptr1|577184  
AT4G20110.1  
AT2G30290.1  
Poptr1|588550  
Poptr1|577185  
AT3G12120.1 Poptr1|561258,Poptr1|576263  
AT5G05580.1,AT3G11170.1 Poptr1|724443,Poptr1|686440  
Poptr1|48459,Poptr1|639715  
Poptr1|695375,Poptr1|701622  
Poptr1|706000  
AT1G54570.1 Poptr1|570954,Poptr1|570948,Poptr1|570952,Poptr1|595487,Poptr1|703653  
AT5G41130.1,AT5G41120.1,AT3G26820.1,AT3G26840.1 Poptr1|65010,Poptr1|65012,Poptr1|65007  
AT3G02030.1  
Poptr1|570949  
Poptr1|595484



Poptr1|103414  
 Poptr1|570951,Poptr1|570950  
 Poptr1|65009  
 AT4G36810.1 Poptr1|563096,Poptr1|741259  
 AT4G38460.1 Poptr1|721619  
 AT3G14510.1,AT3G32040.1,AT3G14530.1,AT2G18620.1,AT3G14550.1,AT2G18640.1,AT3G29430.1  
 AT3G29420.1  
 AT1G49530.1,AT2G23800.1,AT3G20160.1  
 Poptr1|645278,Poptr1|348834,Poptr1|545427  
 Poptr1|582252  
 Poptr1|648837  
 Poptr1|733017  
 AT1G68220.1 Poptr1|658847,Poptr1|354199  
 AT3G15480.1,AT1G52910.1 Poptr1|568938,Poptr1|683323  
 AT1G13380.1 Poptr1|658890,Poptr1|682390  
 AT1G61065.1 Poptr1|555543  
 AT4G27435.1  
 Poptr1|670105  
 Poptr1|568937  
 Poptr1|569785  
 AT4G33580.2 Poptr1|654589,Poptr1|716403,Poptr1|736026,Poptr1|577325  
 AT3G01500.2 Poptr1|706713  
 AT1G58180.2  
 AT5G14740.1  
 Poptr1|597587  
 AT5G56450.1 Poptr1|561644  
 AT5G17400.1 Poptr1|345856  
 AT4G28390.1 Poptr1|695730,Poptr1|703497  
 AT5G13490.1,AT3G08580.1 Poptr1|683860,Poptr1|722763  
 Poptr1|554972,Poptr1|547878  
 AT4G14350.1,AT3G23310.1 Poptr1|345450,Poptr1|54963  
 AT4G33080.1 Poptr1|344605  
 AT1G03920.1 Poptr1|72909,Poptr1|346825  
 AT5G09890.2 Poptr1|591951,Poptr1|692530  
 AT2G19400.1  
 AT2G20470.1  
 Poptr1|561039  
 AT3G08040.1 Poptr1|64554,Poptr1|722781  
 AT4G38380.1 Poptr1|556998,Poptr1|713451  
 AT1G51340.2 Poptr1|722929  
 AT2G38330.1 Poptr1|577058  
 Poptr1|694406  
 Poptr1|576335  
 AT1G47960.1 Poptr1|557561,Poptr1|658101  
 AT3G17140.1  
 Poptr1|595854  
 AT4G02250.1,AT1G55770.1 Poptr1|555333,Poptr1|590151  
 AT3G16300.1 Poptr1|64055,Poptr1|553757  
 AT1G79780.1  
 AT4G09630.1,AT1G34550.1 Poptr1|59017,Poptr1|59522  
 AT5G42660.1 Poptr1|692427  
 AT1G28240.1 Poptr1|713946,Poptr1|580911  
 AT2G02910.1  
 AT1G53040.1  
 Poptr1|107425  
 AT5G02830.1 Poptr1|59140  
 Poptr1|579855  
 Poptr1|579856  
 AT3G01510.1 Poptr1|64762  
 AT2G30710.1 Poptr1|695751  
 AT1G21710.1 Poptr1|72485  
 AT4G32400.1 Poptr1|58552,Poptr1|561876  
 AT5G64970.1,AT1G25380.1,AT1G34065.1,AT5G48970.1,AT4G26180.1,AT1G78180.1,AT1G74240.1,AT2G37890.1,AT3G51870.1,AT4G01100.1,AT2G30160.1,AT3G53940.1,AT4G11440.1,AT1G14560.1,AT2G47490.1,AT3G20240.1,AT4G39460.1,AT5G01500.1,AT3G21390.1,AT3G55640.1,AT5G42130.1,AT1G79900.1  
 Poptr1|55514,Poptr1|559110,Poptr1|716001,Poptr1|72637,Poptr1|344271,Poptr1|562596,Poptr1|562595,Poptr1|348298,Poptr1|686468,Poptr1|576855,Poptr1|731262,Poptr1|649793,Poptr1|552249,Poptr1|576964,Poptr1|64703,Poptr1|572659,Poptr1|344303,Poptr1|581798,Poptr1|646728,Poptr1|54950,Poptr1|640384  
 AT2G33820.1 Poptr1|60423,Poptr1|545275  
 AT5G46800.1 Poptr1|690001,Poptr1|689478  
 AT5G66380.1 Poptr1|76357  
 AT1G07030.1,AT1G07025.1  
 Poptr1|344611  
 Poptr1|594118  
 Poptr1|343348,Poptr1|559351,Poptr1|655635,Poptr1|705708,Poptr1|695311,Poptr1|345273,Poptr1|55256  
 Poptr1|554371  
 Poptr1|592801  
 Poptr1|551284  
 Poptr1|579828  
 AT5G11970.1 Poptr1|703926,Poptr1|553531,Poptr1|352653,Poptr1|717582  
 AT2G47480.1 Poptr1|572643  
 AT4G09890.1 Poptr1|551296,Poptr1|559411

AT3G13910.1  
AT2G19460.1  
AT1G72720.1  
AT3G05725.1  
AT3G62640.1  
Poptr1|654919  
AT3G16175.1 Poptr1|349587,Poptr1|553739  
AT1G05780.1,AT2G31710.1 Poptr1|589839  
AT5G49880.1 Poptr1|704692  
Poptr1|742580  
AT2G37080.1 Poptr1|576652  
AT5G60210.1  
AT2G19950.1 Poptr1|669377  
Poptr1|669375  
Poptr1|587378  
AT5G15880.1 Poptr1|556168,Poptr1|580755  
AT1G72990.1 Poptr1|592772  
AT5G42750.1 Poptr1|347664,Poptr1|591927  
AT5G06760.1 Poptr1|667377  
AT5G53430.1,AT4G27910.1 Poptr1|569541,Poptr1|574760  
AT5G42400.1 Poptr1|550697  
Poptr1|572391,Poptr1|348075  
AT3G15000.1 Poptr1|583045,Poptr1|660879  
AT1G53260.1  
AT1G78310.1 Poptr1|559068,Poptr1|551604  
AT4G24500.1 Poptr1|72185,Poptr1|692586  
AT3G18280.1,AT1G48750.1 Poptr1|688442,Poptr1|714059,Poptr1|645317,Poptr1|355543  
AT5G38180.1,AT1G66850.1,AT5G38195.1  
AT1G43666.1,AT3G57310.1,AT5G38170.1,AT2G14846.1,AT1G43665.1,AT5G38160.1,AT1G43667.1  
AT1G73780.1  
AT1G64235.1  
AT5G26960.1 Poptr1|549362  
AT5G55100.2 Poptr1|642208  
Poptr1|642207  
AT4G28990.1 Poptr1|673156  
AT1G79200.1 Poptr1|678771,Poptr1|51790  
Poptr1|562853  
AT2G33793.1 Poptr1|580898  
Poptr1|713978  
AT3G51640.1,AT3G51650.1 Poptr1|653199  
AT1G01730.1 Poptr1|700219,Poptr1|644443  
Poptr1|575831  
AT4G21820.1 Poptr1|647584  
AT4G27745.1 Poptr1|661558,Poptr1|709071,Poptr1|666094  
AT2G40110.1 Poptr1|659530,Poptr1|656228  
AT4G27740.1 Poptr1|661559,Poptr1|574710  
AT5G53940.1 Poptr1|728369  
AT3G11230.1  
AT3G08990.1  
AT3G55890.1  
Poptr1|343717  
Poptr1|580938  
AT4G08980.1 Poptr1|692650  
AT1G18610.1,AT1G74150.1 Poptr1|661804  
Poptr1|671355  
AT2G32850.2 Poptr1|672679  
AT1G04210.1 Poptr1|354522,Poptr1|698044  
AT4G00090.1 Poptr1|711141,Poptr1|730864  
AT5G22320.1 Poptr1|741761  
AT5G01750.2,AT3G11740.1,AT1G33840.1,AT2G14560.1  
Poptr1|681715,Poptr1|734260,Poptr1|577126,Poptr1|577114,Poptr1|577117,Poptr1|577132,Poptr1|57713  
0,Poptr1|668152,Poptr1|577129,Poptr1|577128  
AT2G30270.1 Poptr1|574514  
AT3G56180.1 Poptr1|564095,Poptr1|567198  
AT3G16900.1  
Poptr1|680614  
AT1G16540.1 Poptr1|719124  
AT1G62530.1,AT1G12120.1 Poptr1|704260,Poptr1|693507  
AT3G53760.1 Poptr1|57205  
AT1G22870.1,AT1G71410.1 Poptr1|592384  
AT3G17950.1 Poptr1|575024,Poptr1|661665  
AT5G02440.1 Poptr1|560753,Poptr1|549181,Poptr1|697655  
AT4G24150.1 Poptr1|548247  
AT2G45480.1 Poptr1|572129  
Poptr1|646519,Poptr1|548554  
AT1G04190.1 Poptr1|564869,Poptr1|658487  
AT5G03160.1 Poptr1|701518  
AT1G33400.1 Poptr1|577257  
Poptr1|577258  
AT4G13530.1 Poptr1|592378  
AT4G10080.1  
AT5G26180.1 Poptr1|561616

AT1G06560.1 Poptr1|72710  
 AT4G23060.1 Poptr1|63586,Poptr1|646571  
 AT5G05320.1,AT4G38540.1 Poptr1|105596,Poptr1|546255  
 AT2G35660.1,AT2G29720.1 Poptr1|702874  
 AT4G15760.1  
 AT4G15765.1  
 Poptr1|549884,Poptr1|580001,Poptr1|595907,Poptr1|595906,Poptr1|102770  
 Poptr1|556660,Poptr1|595923  
 Poptr1|589598  
 Poptr1|349787  
 AT3G63330.1 Poptr1|559603  
 AT4G18260.1 Poptr1|568448  
 AT4G29070.1 Poptr1|691496  
 AT5G64630.2 Poptr1|562443  
 AT1G63120.1 Poptr1|684888,Poptr1|63585,Poptr1|734144  
 AT1G77860.1 Poptr1|347322  
 AT2G29050.1 Poptr1|706133  
 AT1G12750.1  
 AT5G07250.1  
 AT4G23070.1  
 AT3G53780.2  
 AT1G52580.1  
 Poptr1|344250  
 Poptr1|717367  
 AT4G10930.1 Poptr1|63411  
 AT4G10940.1  
 AT4G17330.1 Poptr1|553878  
 AT3G18060.1 Poptr1|569761,Poptr1|688446  
 AT2G01330.1  
 AT3G61780.1 Poptr1|572398  
 AT5G28320.1,AT5G28400.1  
 AT5G52910.1 Poptr1|100162  
 AT3G02680.1 Poptr1|734231  
 AT4G20350.1 Poptr1|688092  
 AT1G32550.1 Poptr1|670409  
 Poptr1|554824  
 AT2G35900.1 Poptr1|688743  
 Poptr1|594094  
 AT1G65900.1 Poptr1|592815  
 Poptr1|592816  
 AT1G30960.1 Poptr1|589836  
 AT3G23400.1 Poptr1|696358  
 Poptr1|697876  
 AT1G10310.1 Poptr1|703798  
 AT1G52340.1 Poptr1|547844  
 AT3G55290.1,AT3G46170.1,AT2G17845.1,AT1G62610.3,AT3G55310.1,AT1G63380.1 Poptr1|701307  
 AT3G04000.1,AT3G03980.1 Poptr1|665443,Poptr1|571216,Poptr1|730005  
 AT4G03140.1 Poptr1|572761,Poptr1|572755  
 AT3G26760.1 Poptr1|553102,Poptr1|572882  
 AT3G42960.1 Poptr1|566373,Poptr1|564728  
 AT3G51680.1 Poptr1|577103,Poptr1|560966  
 AT2G47130.1,AT2G47120.1,AT2G47140.1,AT3G29260.1 Poptr1|572556  
 AT1G54870.1 Poptr1|729633  
 AT5G18210.1  
 AT4G13180.1  
 AT3G26770.1  
 AT3G29250.1,AT2G47150.1  
 AT3G05260.1  
 Poptr1|594950,Poptr1|593773,Poptr1|674833,Poptr1|58043,Poptr1|576543,Poptr1|561446,Poptr1|352464,  
 Poptr1|679903  
 Poptr1|109044  
 Poptr1|560373,Poptr1|580625  
 Poptr1|106209  
 Poptr1|355149  
 Poptr1|561445,Poptr1|576542,Poptr1|352467,Poptr1|352463  
 Poptr1|590633  
 Poptr1|666348,Poptr1|687833,Poptr1|575047,Poptr1|666749  
 Poptr1|594951  
 Poptr1|575446  
 Poptr1|653689  
 Poptr1|596170,Poptr1|719890,Poptr1|726630  
 AT2G18030.1 Poptr1|655450  
 AT4G25130.1 Poptr1|746972,Poptr1|733870  
 AT5G07470.1,AT5G61640.1  
 AT5G07460.1  
 Poptr1|592961  
 AT3G62330.1 Poptr1|57167,Poptr1|710316  
 AT5G22040.1 Poptr1|563530,Poptr1|108589,Poptr1|660117  
 AT1G26590.1,AT1G26610.1 Poptr1|353919,Poptr1|566941  
 Poptr1|545981  
 AT4G29250.1 Poptr1|701988  
 Poptr1|595436,Poptr1|593086

AT1G03530.1 Poptr1|571778,Poptr1|580360  
 AT1G78810.1 Poptr1|699066  
 AT4G28430.1,AT2G20590.1 Poptr1|718222,Poptr1|594644  
 AT4G16520.1 Poptr1|712083,Poptr1|581249  
 AT3G15580.1 Poptr1|684246,Poptr1|659176  
 AT2G05630.1 Poptr1|711392,Poptr1|47678  
 AT2G45170.1  
 AT3G06420.1  
 AT1G62040.1  
 Poptr1|591664,Poptr1|552018  
 Poptr1|656570  
 AT2G07715.1,ATMG00560.1 Poptr1|101788  
 Poptr1|571672  
 Poptr1|589222  
 AT5G16610.2 Poptr1|552945  
 AT3G19180.1 Poptr1|569436,Poptr1|96955  
 Poptr1|569434  
 AT5G10790.1 Poptr1|562011,Poptr1|578303  
 Poptr1|736485  
 AT4G13950.1,AT3G23805.1 Poptr1|549784,Poptr1|597073  
 AT2G33775.1,AT1G28270.1 Poptr1|555786,Poptr1|555785  
 AT1G02900.1 Poptr1|671680,Poptr1|664471  
 AT3G16570.1,AT4G15800.1 Poptr1|673280  
 AT5G67070.1 Poptr1|716238  
 AT3G05490.1  
 Poptr1|729546  
 Poptr1|591972  
 AT1G71800.1 Poptr1|347064  
 AT1G57600.1 Poptr1|687892  
 AT3G24060.1 Poptr1|63100,Poptr1|554814  
 Poptr1|547994  
 AT1G20050.1 Poptr1|548131,Poptr1|646939  
 AT5G38520.1 Poptr1|581060  
 AT5G55690.1 Poptr1|349092,Poptr1|64150  
 Poptr1|588539  
 AT4G25650.2 Poptr1|343942,Poptr1|62705  
 AT3G44880.1 Poptr1|99159  
 Poptr1|647468,Poptr1|639645  
 Poptr1|555210  
 Poptr1|105955,Poptr1|555212  
 Poptr1|555211  
 Poptr1|647467  
 Poptr1|558335  
 Poptr1|558334  
 AT2G18850.1 Poptr1|580469  
 AT4G12640.1 Poptr1|700645  
 AT1G07980.1 Poptr1|558256  
 AT2G19430.1 Poptr1|696210  
 AT3G09080.1 Poptr1|560876  
 ATCG01250.1,ATCG00890.1 Poptr1|579873,Poptr1|582628  
 Poptr1|107510,Poptr1|107540,Poptr1|581150,Poptr1|581300,Poptr1|107302  
 Poptr1|586565,Poptr1|568399  
 Poptr1|586232,Poptr1|583352  
 Poptr1|587269,Poptr1|582005,Poptr1|579777,Poptr1|568401  
 Poptr1|585430,Poptr1|585222  
 Poptr1|555905  
 Poptr1|581824,Poptr1|586852  
 Poptr1|588533,Poptr1|591255  
 Poptr1|586395,Poptr1|593384,Poptr1|593135  
 AT5G58220.1 Poptr1|343130  
 AT1G78430.1,AT1G17140.1 Poptr1|684060  
 AT3G07530.1 Poptr1|681152  
 Poptr1|596867  
 AT4G19830.1 Poptr1|586750  
 Poptr1|575581  
 AT4G26555.1 Poptr1|642655  
 AT5G46840.1 Poptr1|590029,Poptr1|343477  
 AT2G21290.1 Poptr1|556543,Poptr1|557169  
 AT1G01880.1 Poptr1|663900  
 Poptr1|552106  
 AT1G15980.1 Poptr1|587208  
 AT2G11910.1 Poptr1|654180,Poptr1|694972,Poptr1|578246  
 AT3G50550.1  
 AT2G17300.1,AT4G35320.1 Poptr1|595021,Poptr1|556760  
 AT5G47077.1,AT3G61172.1,AT5G47075.1 Poptr1|576410  
 AT1G55590.1 Poptr1|582522  
 AT3G54650.1 Poptr1|346902,Poptr1|559640  
 AT5G67140.1 Poptr1|651089  
 Poptr1|53303  
 AT4G13220.1 Poptr1|553252  
 AT1G15910.1,AT4G00380.1,AT1G80790.1 Poptr1|343830  
 AT3G12550.1,AT3G48670.1,AT4G01180.1,AT4G01780.1,AT3G29375.1,AT5G59390.1 Poptr1|659673

AT2G16490.1  
AT1G13790.1  
Poptr1|724403,Poptr1|64379  
AT5G56930.1 Poptr1|352051  
AT3G56900.1 Poptr1|576107  
AT5G44280.1 Poptr1|594655,Poptr1|654383  
AT3G03790.2 Poptr1|571179  
AT5G65540.1 Poptr1|53441  
AT1G55080.1 Poptr1|592771  
AT1G29580.1  
AT5G36160.1 Poptr1|703490,Poptr1|594645,Poptr1|594647,Poptr1|562161,Poptr1|55946,Poptr1|562160  
AT5G53970.1  
AT4G23590.1,AT4G23600.1,AT4G28420.2,AT2G20610.1,AT4G28410.1,AT2G24850.1  
AT2G36885.1 Poptr1|735575  
AT3G59630.1 Poptr1|589479  
AT5G27660.1 Poptr1|662713  
Poptr1|662714  
AT4G01670.1 Poptr1|348221,Poptr1|572511  
AT3G62070.1,AT2G46940.1  
AT3G46780.1 Poptr1|549130  
Poptr1|723209  
AT5G49810.1 Poptr1|703809  
AT1G29390.1,AT1G29395.1 Poptr1|674785  
AT2G42700.1 Poptr1|732059  
AT2G23390.1 Poptr1|596774  
AT5G27820.1 Poptr1|682314  
Poptr1|650646  
AT3G42860.1 Poptr1|65066  
AT3G02820.1 Poptr1|658635  
AT5G11330.1 Poptr1|689029  
Poptr1|352871  
AT3G44330.1 Poptr1|686595,Poptr1|594941  
AT4G20300.2 Poptr1|63262,Poptr1|554635  
AT5G13250.1 Poptr1|350559,Poptr1|548079  
AT1G28080.1  
AT3G25180.1 Poptr1|714415,Poptr1|582767  
AT5G10610.1,AT5G10600.1 Poptr1|347618  
AT1G11600.1 Poptr1|555353  
AT3G52970.1 Poptr1|588655,Poptr1|101195,Poptr1|101190,Poptr1|588651  
AT4G31500.1,AT4G13770.1 Poptr1|584186,Poptr1|550917,Poptr1|346721,Poptr1|550924  
AT4G37360.1,AT4G37320.1,AT4G37340.1,AT4G37370.1,AT3G28740.1,AT4G37330.1,AT5G36220.1,AT2G23190.1,AT2G23220.1,AT1G66540.1 Poptr1|745537,Poptr1|100362  
AT2G42250.1 Poptr1|593072,Poptr1|583617  
AT5G06900.1 Poptr1|583619  
AT4G15110.1 Poptr1|351148  
AT5G07990.1 Poptr1|699950  
AT1G64950.1,AT1G64930.1,AT2G12190.1,AT1G64900.1,AT5G61320.1,AT1G64940.1  
Poptr1|558572,Poptr1|571395,Poptr1|580036,Poptr1|663266  
AT1G01280.1 Poptr1|348086  
AT4G12310.1,AT4G12320.1,AT4G12300.1 Poptr1|704247  
AT2G45570.1,AT2G45580.1,AT3G61040.1,AT1G33720.1,AT2G45550.1,AT2G45560.1  
Poptr1|711704,Poptr1|552079,Poptr1|342710,Poptr1|48778,Poptr1|594022,Poptr1|347891,Poptr1|552074  
AT3G53130.1 Poptr1|589522  
AT4G39950.1,AT2G22330.1 Poptr1|555694,Poptr1|571911,Poptr1|584081,Poptr1|571904  
AT5G04660.1,AT3G10570.1 Poptr1|353289  
AT2G40890.1 Poptr1|685839,Poptr1|576112,Poptr1|582895  
AT2G30490.1 Poptr1|571917,Poptr1|739008  
AT5G06905.1 Poptr1|98710  
AT5G09970.1 Poptr1|694349,Poptr1|562708,Poptr1|52062,Poptr1|347060  
AT5G25900.1 Poptr1|551889  
AT4G36220.1 Poptr1|563244,Poptr1|593880  
AT5G47990.1,AT2G14100.1,AT1G50520.1,AT3G20140.1,AT3G32047.1,AT3G20120.1,AT3G20090.1,AT3G20130.1,AT3G20100.1,AT4G15380.1,AT4G15360.1,AT4G15330.1,AT2G05180.1,AT1G28430.1,AT1G50560.1,AT2G27010.1,AT3G20960.1,AT2G27000.1,AT3G20110.1,AT3G20080.1,AT5G42580.1,AT3G20950.1,AT4G15350.1,AT3G20940.1  
Poptr1|557740,Poptr1|64588,Poptr1|697478  
AT2G46660.1,AT3G61880.1 Poptr1|700313,Poptr1|554562,Poptr1|548260,Poptr1|552309  
AT5G57260.1,AT3G26300.1,AT3G26290.1,AT2G02580.1,AT3G26330.1,AT3G26320.1,AT3G26310.1  
Poptr1|565129,Poptr1|354762,Poptr1|565131  
AT4G31970.1,AT4G31950.1,AT4G31940.1 Poptr1|97465,Poptr1|748220  
AT4G37310.1  
AT4G37410.1  
AT5G67310.1  
AT3G03470.1  
AT4G12330.1,AT5G44620.1  
AT4G22710.1,AT4G22690.1  
AT1G33730.1  
AT3G61035.1  
AT1G79370.1,AT1G58260.1,AT1G16410.1  
AT5G35917.1,AT5G05260.1  
AT5G35920.1  
AT1G58265.1  
AT3G10560.1,AT5G04630.1

AT1G74550.1,AT1G74540.1  
 AT5G04330.1  
 AT1G13710.1,AT1G74110.1  
 AT1G01190.1  
 AT3G53300.1,AT1G13110.1,AT3G26190.1,AT3G26210.1,AT3G26180.1,AT3G53290.1,AT3G26830.1,AT3G26280.1,AT3G26220.1,AT1G13080.1,AT3G26150.1,AT3G26160.1,AT3G44250.1,AT1G13090.1,AT3G26270.1,AT1G13100.1,AT3G53280.1,AT3G26170.1,AT5G35715.1,AT3G26200.1,AT3G26230.1  
 AT5G25120.1,AT5G25140.1,AT5G25130.1,AT5G25180.1  
 AT3G53305.1  
 AT2G24180.1  
 AT2G25160.1  
 Poptr1|589083,Poptr1|594537,Poptr1|594534  
 Poptr1|594538  
 Poptr1|546355  
 Poptr1|588644  
 Poptr1|573091,Poptr1|560858  
 Poptr1|589557  
 Poptr1|73008,Poptr1|108237,Poptr1|550922  
 Poptr1|107441,Poptr1|686156,Poptr1|558912,Poptr1|583523,Poptr1|100360,Poptr1|651125,Poptr1|583520,Poptr1|104598,Poptr1|75528,Poptr1|716307  
 Poptr1|579263,Poptr1|579262,Poptr1|551808,Poptr1|579305,Poptr1|342582,Poptr1|572062  
 Poptr1|347615  
 Poptr1|545604  
 Poptr1|596339,Poptr1|583513,Poptr1|596342  
 Poptr1|106121  
 Poptr1|596741  
 Poptr1|589084  
 Poptr1|583522,Poptr1|592016  
 Poptr1|592023  
 Poptr1|567659  
 Poptr1|344463  
 Poptr1|595568,Poptr1|699776,Poptr1|586654  
 Poptr1|576297  
 Poptr1|645827  
 Poptr1|587667  
 Poptr1|98712  
 Poptr1|576295  
 Poptr1|584111,Poptr1|688997,Poptr1|553609,Poptr1|677452,Poptr1|53324,Poptr1|704787,Poptr1|589289  
 Poptr1|54623,Poptr1|64620  
 Poptr1|64952,Poptr1|353961,Poptr1|574677,Poptr1|53198  
 Poptr1|586542,Poptr1|584935,Poptr1|597313  
 Poptr1|584934  
 Poptr1|350003  
 Poptr1|581210,Poptr1|102869,Poptr1|350097  
 Poptr1|547835,Poptr1|691155,Poptr1|699290,Poptr1|570496,Poptr1|570494  
 Poptr1|104161,Poptr1|562677,Poptr1|591034  
 Poptr1|570498  
 Poptr1|645826  
 Poptr1|567977  
 Poptr1|645828,Poptr1|591136  
 Poptr1|591135  
 Poptr1|587288  
 Poptr1|560691,Poptr1|99255  
 Poptr1|560692  
 Poptr1|347690  
 Poptr1|546129  
 Poptr1|591028,Poptr1|562672,Poptr1|562681,Poptr1|562675  
 Poptr1|105888  
 Poptr1|695954,Poptr1|562775,Poptr1|550174,Poptr1|75918  
 Poptr1|553608,Poptr1|562670  
 Poptr1|550178  
 Poptr1|53213,Poptr1|75820,Poptr1|562669,Poptr1|75817  
 Poptr1|104793  
 Poptr1|591035  
 Poptr1|577186  
 Poptr1|103236  
 Poptr1|64602  
 Poptr1|595744,Poptr1|591862,Poptr1|593664,Poptr1|583742,Poptr1|596410,Poptr1|594036,Poptr1|591868  
 8  
 Poptr1|106127,Poptr1|549654,Poptr1|591863,Poptr1|591866,Poptr1|591870  
 Poptr1|591869  
 Poptr1|585709,Poptr1|583915  
 Poptr1|585265,Poptr1|549656  
 Poptr1|586946  
 Poptr1|591864,Poptr1|101879  
 AT2G21840.1,AT2G21850.1 Poptr1|573728  
 AT3G21210.1,AT5G42840.1,AT5G02360.1,AT5G55780.1,AT3G13760.1,AT4G11550.1,AT3G59130.1,AT3G46810.1,AT5G37620.1,AT2G13950.1,AT2G19660.1,AT1G55430.1,AT2G19650.1,AT5G54020.1,AT5G59940.1,AT5G54040.1,AT3G27473.1,AT3G45530.1,AT2G04680.1,AT4G11390.1,AT2G17590.1,AT4G01760.1,AT3G43890.1,AT4G11540.1,AT5G22355.1,AT4G01930.1,AT5G59920.1,AT5G29624.1,AT4G02180.1,AT2G02700.1,AT5G55800.1,AT1G55380.1,AT4G01910.1,AT3G45840.1,AT5G55770.1,AT4G09690.1,AT2G02620.1,AT3G26550.1,AT5G02340.1,AT3G11390.1,AT5G40320.1,AT5G59930.1,AT2G02680.1,AT4G01350.1,AT1G65180.1,AT3G13590.1,AT3G48400.1,AT5G17960.1,AT3G468

00.1,AT3G59120.1,AT5G54050.1  
Poptr1|585565,Poptr1|587885,Poptr1|576245,Poptr1|586179,Poptr1|103371,Poptr1|576271,Poptr1|57624  
6,Poptr1|576373  
AT2G37820.1,AT2G37810.1 Poptr1|567363  
AT2G27660.1 Poptr1|569411,Poptr1|583286  
AT5G40590.1,AT2G44380.1,AT2G44390.1,AT2G17740.1,AT5G43520.1,AT2G44370.1,AT2G28270.1  
Poptr1|583290  
AT2G21830.1  
AT1G58037.1,AT1G55390.1,AT5G16430.1,AT4G02190.1,AT3G11385.1,AT3G06990.1,AT5G43040.1,AT1G44030.1,A  
T4G01740.1,AT2G13900.1,AT1G62030.1,AT5G02330.1,AT5G42280.1,AT4G01925.1,AT5G26190.1,AT1G44020.1,AT  
5G54030.1,AT2G04500.1,AT4G01920.1,AT3G28650.1,AT1G66450.1,AT3G27490.1,AT3G07000.1,AT5G43030.1,AT3  
G11370.1,AT3G27480.1,AT2G23100.1,AT3G25850.1,AT1G53340.1  
AT3G11402.1,AT2G17600.1,AT5G46660.1,AT5G03360.1,AT1G55700.1,AT4G10370.1,AT3G27500.1,AT2G02630.1,A  
T1G34480.1,AT3G26250.1,AT3G27510.1,AT2G02690.1,AT4G16015.1,AT5G37210.1,AT1G66440.1,AT5G45730.1,AT  
4G10560.1,AT1G44050.1,AT1G61840.1,AT1G69150.1,AT1G29180.1,AT4G13130.1,AT3G50010.1,AT1G35610.1,AT4  
G15070.1,AT5G46670.1,AT3G26240.1,AT2G40050.1,AT4G26380.1,AT4G02540.1,AT5G44770.1,AT2G43220.1,AT2G  
02640.1,AT1G45243.1,AT1G55440.1,AT2G02610.1,AT4G14980.1,AT5G01480.1,AT2G28460.1,AT5G48320.1,AT5G0  
2350.1  
AT2G21810.1  
AT1G55420.1  
AT2G37800.1  
AT2G42060.1  
AT2G44400.1  
Poptr1|594768  
Poptr1|575783  
Poptr1|570464  
Poptr1|576374  
Poptr1|587886,Poptr1|579547  
Poptr1|350235  
AT5G48890.1 Poptr1|553123  
AT1G66140.1 Poptr1|348737,Poptr1|657009,Poptr1|566407,Poptr1|555999  
AT5G57520.1 Poptr1|58703,Poptr1|96865  
AT1G24625.1  
AT1G73350.1 Poptr1|545088  
AT2G32980.1 Poptr1|645054,Poptr1|573008  
AT3G01520.1,AT5G14680.1 Poptr1|577503  
AT1G09710.1 Poptr1|692610  
AT1G58220.1  
AT2G46300.1 Poptr1|552244,Poptr1|572350  
AT4G01110.1  
AT2G30505.1  
AT2G27350.3 Poptr1|648978  
Poptr1|679877  
AT4G35240.1,AT2G17110.1 Poptr1|721554,Poptr1|546752  
AT1G21740.1,AT1G77500.1 Poptr1|692735,Poptr1|559249  
AT4G30130.1,AT2G19090.1 Poptr1|351691  
Poptr1|559927,Poptr1|550788  
Poptr1|558477  
Poptr1|703353,Poptr1|556663  
Poptr1|584564,Poptr1|553522  
AT5G49010.1 Poptr1|564375  
AT1G61570.1 Poptr1|727278,Poptr1|691911  
AT1G67060.1 Poptr1|574910  
Poptr1|545350  
AT2G21800.1,AT2G22140.1 Poptr1|562749  
Poptr1|562750  
AT2G31340.1 Poptr1|348581  
Poptr1|585332  
AT4G06634.1 Poptr1|689893  
AT4G32810.1 Poptr1|352771,Poptr1|578053  
AT1G72390.1 Poptr1|553578,Poptr1|98995,Poptr1|553577  
AT1G72380.1  
Poptr1|349650  
AT3G19750.1,AT1G50150.1 Poptr1|558701,Poptr1|75970  
AT1G26600.1,AT1G69320.1 Poptr1|566953  
AT3G18730.1 Poptr1|75568  
AT5G63080.1 Poptr1|575205  
Poptr1|575204  
AT1G48405.1,AT3G17680.1 Poptr1|569415,Poptr1|580612  
AT5G24750.1 Poptr1|553449  
AT5G38510.1 Poptr1|580779  
AT2G16030.1,AT4G26730.1 Poptr1|574521,Poptr1|571852  
AT1G24480.1 Poptr1|565955  
Poptr1|565104  
AT5G01710.1 Poptr1|577091,Poptr1|560959  
Poptr1|574540  
AT5G41190.1 Poptr1|693448  
AT3G58110.1,AT2G42370.1 Poptr1|678045,Poptr1|574360  
AT3G17170.1 Poptr1|564358  
AT4G39040.1 Poptr1|557189  
AT2G21350.1  
AT4G31410.1 Poptr1|583159,Poptr1|578390

AT1G68140.1 Poptr1|553460,Poptr1|63889  
 AT1G77770.1 Poptr1|72411,Poptr1|710834  
 AT3G25910.1 Poptr1|561120,Poptr1|704603  
 AT3G24740.1 Poptr1|644990  
 AT4G08460.1  
 AT2G26050.1,AT1G80220.1  
     Poptr1|63704,Poptr1|349492  
 AT1G15420.1 Poptr1|691202,Poptr1|349491  
 AT5G66440.1 Poptr1|593908,Poptr1|563191  
 AT3G62190.1 Poptr1|552604  
 AT4G07990.1 Poptr1|347551,Poptr1|685240  
 AT5G18310.2 Poptr1|574984,Poptr1|571148,Poptr1|585605  
 AT1G49770.1 Poptr1|65194  
 AT1G21830.1 Poptr1|716656,Poptr1|551458  
 AT1G44608.1  
 AT2G17900.1 Poptr1|559193  
 AT2G26190.1,AT4G33050.2 Poptr1|717926  
 AT3G52870.1 Poptr1|696988  
 AT3G13600.1 Poptr1|351019,Poptr1|62708  
 AT3G58480.1 Poptr1|561205  
     Poptr1|695333  
     Poptr1|349356,Poptr1|349355  
     Poptr1|575652  
     Poptr1|739731,Poptr1|576146  
     Poptr1|62704  
     Poptr1|667534  
 AT1G04130.1 Poptr1|553283  
     Poptr1|573382  
 AT1G06190.1 Poptr1|72893,Poptr1|551032  
 AT2G31150.1  
 AT5G46850.1 Poptr1|693577  
 AT3G61200.1 Poptr1|700200,Poptr1|692413  
 AT5G57460.1 Poptr1|580474,Poptr1|595995  
 AT5G51020.1 Poptr1|570374  
 AT3G21000.1  
     Poptr1|101802,Poptr1|591589,Poptr1|562035,Poptr1|578984,Poptr1|348442,Poptr1|105328,Poptr1|10837  
     8,Poptr1|546161,Poptr1|107067,Poptr1|106948,Poptr1|582458,Poptr1|102850,Poptr1|586908,Poptr1|108619,Poptr1|7  
     5480,Poptr1|106395,Poptr1|583464,Poptr1|104619,Poptr1|103858,Poptr1|562034,Poptr1|584331  
     Poptr1|597335  
 AT2G42975.1 Poptr1|651689,Poptr1|347036  
 AT5G57440.1,AT4G25840.1 Poptr1|702176  
 AT4G38810.2 Poptr1|556579  
 AT1G63310.1 Poptr1|691915,Poptr1|569241  
 AT5G43650.1 Poptr1|354554,Poptr1|566140  
 AT5G18920.1 Poptr1|657936,Poptr1|345581  
 AT3G52860.1 Poptr1|731805  
     Poptr1|552455  
 AT3G03130.1,AT5G17160.1 Poptr1|357049,Poptr1|100088  
 AT1G29980.1,AT2G34510.1 Poptr1|727936  
 AT3G08030.1 Poptr1|549292  
 AT2G41810.1,AT2G41800.1 Poptr1|560498,Poptr1|576359,Poptr1|351516  
 AT5G11420.1,AT5G25460.1,AT4G32460.1 Poptr1|716738,Poptr1|701999  
 AT5G14150.1  
     Poptr1|548619  
     Poptr1|107375  
 AT2G21710.1 Poptr1|557255  
 AT1G10780.1 Poptr1|553431,Poptr1|63871  
 AT1G67190.1 Poptr1|679937  
     Poptr1|548169  
 AT2G42780.1 Poptr1|569847  
 AT2G28490.1 Poptr1|722895  
     Poptr1|597481  
     Poptr1|64492  
 AT2G05170.1 Poptr1|57340  
 AT1G09790.1 Poptr1|584477  
 AT3G02210.1 Poptr1|704291,Poptr1|712852  
 AT5G15630.1 Poptr1|744184  
 AT5G60920.1  
 AT3G29810.1  
 AT5G60950.1  
     Poptr1|98821,Poptr1|98820,Poptr1|98822  
     Poptr1|569882,Poptr1|581399  
     Poptr1|583846,Poptr1|556388  
 AT3G52350.1,AT5G08535.1 Poptr1|563423  
 AT4G12830.1 Poptr1|573185  
 AT5G50310.1 Poptr1|575296  
 AT2G39580.1 Poptr1|656062,Poptr1|724759  
     Poptr1|656063  
 AT3G27180.1 Poptr1|49208  
 AT1G11320.1 Poptr1|73077  
 AT4G15640.1,AT3G21465.1 Poptr1|565360  
 AT5G06610.1 Poptr1|667523,Poptr1|653449



AT1G79420.1 Poptr1|567108,Poptr1|720561  
 AT1G75160.1 Poptr1|553357  
 AT3G19540.1,AT1G49840.1 Poptr1|592037  
 AT5G05840.1 Poptr1|563964,Poptr1|724572  
 AT1G27690.1  
 AT3G55720.1  
     Poptr1|597191  
     Poptr1|53366  
     Poptr1|722360  
     Poptr1|549972  
 AT5G43310.1 Poptr1|697873,Poptr1|354590  
 AT2G34820.1,AT1G30670.1 Poptr1|569330  
 AT3G22100.1  
 AT2G32090.1 Poptr1|345409,Poptr1|687098  
 AT2G38780.1 Poptr1|708533  
 AT3G10970.1 Poptr1|702405  
 AT2G32900.1 Poptr1|552728  
 AT5G56900.2 Poptr1|589197  
 AT1G80710.1 Poptr1|58762  
 AT5G19950.1 Poptr1|578406  
     Poptr1|578407  
 AT4G09530.1 Poptr1|592258,Poptr1|574266  
 AT1G75590.1,AT5G10990.1,AT1G19840.1 Poptr1|642994,Poptr1|559812  
 AT4G34760.1,AT2G16580.1 Poptr1|550905,Poptr1|713175,Poptr1|563277  
 AT2G36210.1 Poptr1|344544  
 AT4G34770.1 Poptr1|546167  
 AT3G60690.1 Poptr1|552025,Poptr1|572079  
 AT2G37030.1,AT3G53250.1 Poptr1|676029  
 AT2G21210.1,AT4G38840.1 Poptr1|546169,Poptr1|649286,Poptr1|649287  
 AT3G12830.1 Poptr1|655028,Poptr1|650935  
 AT5G18050.1,AT5G18080.1,AT3G03840.1,AT2G21200.1,AT5G18020.1,AT3G03850.1,AT5G18060.1,AT5G18010.1,A  
 T5G18030.1,AT3G03830.1,AT3G03820.1  
     Poptr1|556562,Poptr1|54410,Poptr1|649293,Poptr1|556563,Poptr1|649292,Poptr1|649291,Poptr1|556564,  
 Poptr1|556565,Poptr1|556560,Poptr1|556557,Poptr1|648718,Poptr1|557152  
 AT4G00880.1 Poptr1|348136,Poptr1|569631,Poptr1|574684,Poptr1|664170  
 AT3G09870.1 Poptr1|576714  
 AT5G50760.1 Poptr1|693261,Poptr1|570308,Poptr1|63168  
 AT4G22620.1,AT4G12410.1 Poptr1|554218,Poptr1|581224  
 AT3G51200.1  
 AT4G36110.1,AT2G18010.1  
 AT2G21220.1  
 AT2G45210.1  
 AT5G03310.1  
 AT4G34790.1,AT4G34810.1  
 AT1G56150.1  
 AT1G79130.1,AT1G16510.1  
 AT3G03847.1,AT4G38850.1  
 AT4G13790.1  
 AT5G53590.1  
 AT2G46690.1  
 AT3G61900.1  
     Poptr1|560619,Poptr1|556554  
     Poptr1|54414  
     Poptr1|649288  
     Poptr1|648723  
     Poptr1|567629,Poptr1|353369  
     Poptr1|556571  
     Poptr1|557147,Poptr1|546165  
     Poptr1|557144,Poptr1|556572  
     Poptr1|646032  
     Poptr1|551225  
     Poptr1|557146  
     Poptr1|648719  
     Poptr1|557145  
     Poptr1|557149  
 AT1G72830.2,AT1G17590.1 Poptr1|668702,Poptr1|561021  
 AT2G34720.1,AT1G30500.2 Poptr1|675405,Poptr1|550256  
 AT3G20910.1,AT5G12840.1 Poptr1|641280,Poptr1|557856  
 AT3G05690.1,AT5G06510.1 Poptr1|576480,Poptr1|561162  
 AT1G54160.1,AT3G14020.1  
     Poptr1|652752  
     Poptr1|549314  
 AT2G40780.1 Poptr1|704222  
 AT2G31081.1,AT1G06225.1 Poptr1|574354,Poptr1|592177  
     Poptr1|568745  
 AT5G44710.1 Poptr1|554612  
 AT5G27680.1 Poptr1|97739  
 AT5G04750.1 Poptr1|660146,Poptr1|655739  
 AT3G28140.1,AT5G40190.1 Poptr1|701793,Poptr1|706695  
 AT3G53920.1 Poptr1|716864  
 AT1G08540.1 Poptr1|738588,Poptr1|688019  
 AT5G13730.1 Poptr1|557818

AT1G64860.1 Poptr1|730207,Poptr1|689261  
AT2G36990.1 Poptr1|589461  
AT1G55370.2 Poptr1|573916,Poptr1|573911  
AT1G03250.1 Poptr1|747010  
AT4G33470.1 Poptr1|71535  
AT1G56200.1 Poptr1|672191  
AT1G30475.1  
AT5G48680.1,AT3G07170.1 Poptr1|573345,Poptr1|553190  
AT4G02560.1 Poptr1|573446,Poptr1|572730  
AT1G08200.1,AT2G27860.1 Poptr1|594851,Poptr1|649062  
AT1G67210.1,AT5G38600.1 Poptr1|580764  
AT5G65780.1,AT3G49680.1 Poptr1|76469  
AT1G10070.1 Poptr1|710539  
AT1G50090.1,AT1G50110.1,AT3G19710.1 Poptr1|722470  
AT1G10060.2  
Poptr1|551738  
Poptr1|577031  
Poptr1|103486  
AT5G63000.1 Poptr1|575181  
AT2G02170.1 Poptr1|55172,Poptr1|696469  
AT1G30320.1 Poptr1|691800  
AT2G41870.1,AT3G57540.1 Poptr1|351543,Poptr1|576341  
AT1G53860.1 Poptr1|99021  
AT1G67590.1 Poptr1|565066  
Poptr1|581843  
Poptr1|591675  
AT1G28070.1,AT2G33510.1 Poptr1|350569,Poptr1|46266  
AT5G23110.1 Poptr1|558698  
Poptr1|650901  
AT1G43670.1 Poptr1|651552,Poptr1|643486  
AT5G64380.1 Poptr1|577299  
AT3G54050.1 Poptr1|735683  
Poptr1|584602  
Poptr1|653063,Poptr1|597428  
Poptr1|560856,Poptr1|701575  
AT4G27840.1,AT5G52990.1 Poptr1|574739,Poptr1|661534  
AT5G01300.1 Poptr1|58211  
AT3G16990.1 Poptr1|696624  
AT1G18990.1,AT1G74830.1 Poptr1|570021,Poptr1|575075  
Poptr1|590807  
AT2G28820.1,ATCG00790.1 Poptr1|108028  
AT5G58260.1 Poptr1|700098  
Poptr1|574450  
AT1G06790.1 Poptr1|643210  
AT1G62520.1 Poptr1|646453,Poptr1|671227  
AT4G12450.1,AT4G22560.1  
AT5G26990.1 Poptr1|662637,Poptr1|671731  
AT3G06760.1,AT5G49230.1 Poptr1|725506,Poptr1|742305  
AT3G05700.1  
AT1G56280.1  
Poptr1|704191  
Poptr1|572658,Poptr1|684268  
Poptr1|662045  
Poptr1|585597,Poptr1|595859  
Poptr1|673179,Poptr1|586601  
Poptr1|582684  
AT2G31670.1 Poptr1|726985,Poptr1|97866  
AT1G51360.1  
AT3G62630.1 Poptr1|671745,Poptr1|570730  
AT2G31740.1 Poptr1|65069  
AT4G34360.1 Poptr1|546017  
Poptr1|557299  
AT5G11640.1 Poptr1|561741  
AT3G13990.1 Poptr1|63682,Poptr1|343310  
AT1G19025.1 Poptr1|562460  
AT1G61690.1 Poptr1|55793  
Poptr1|544965  
AT1G32900.1 Poptr1|569276,Poptr1|642515  
AT3G01180.1 Poptr1|688944  
Poptr1|705646  
AT1G25275.3 Poptr1|575561,Poptr1|666830,Poptr1|666826,Poptr1|591429  
AT1G14620.1 Poptr1|644529  
AT3G09470.1 Poptr1|695442  
AT5G24120.1 Poptr1|586566,Poptr1|591382  
Poptr1|569483  
AT4G21215.2 Poptr1|694055,Poptr1|568218  
AT3G48500.1 Poptr1|733541  
AT5G57700.1 Poptr1|689144  
Poptr1|561412  
AT5G09680.1 Poptr1|641332  
ATCG00710.1 Poptr1|748684,Poptr1|597224,Poptr1|597221  
AT1G75340.1 Poptr1|695454

Poptr1|584526  
AT1G33265.1 Poptr1|581103,Poptr1|569220  
AT1G48620.1,AT3G18035.1 Poptr1|700853  
AT1G48610.1  
AT4G01510.1,AT1G01020.1 Poptr1|731478  
Poptr1|552376  
AT2G07360.1 Poptr1|584545  
Poptr1|746054  
AT5G45760.1 Poptr1|728143  
AT4G20930.1 Poptr1|550610  
AT5G17170.1 Poptr1|738570  
AT1G51160.1 Poptr1|592939  
AT1G64080.1 Poptr1|646680,Poptr1|548403  
AT5G28960.1,AT5G28910.2 Poptr1|672996  
Poptr1|571107  
AT1G58070.1 Poptr1|596724,Poptr1|573734  
AT5G59380.1,AT3G46580.1 Poptr1|697649,Poptr1|691401  
AT5G52230.1 Poptr1|570484,Poptr1|701174  
AT1G68185.1 Poptr1|566557  
AT4G03030.1 Poptr1|72858,Poptr1|710925  
AT5G25770.2 Poptr1|654008  
AT4G39880.1 Poptr1|71639  
AT1G42480.1 Poptr1|694911  
Poptr1|346560  
AT1G77320.1 Poptr1|51993  
AT3G05250.1 Poptr1|595585,Poptr1|595131  
AT4G37020.1 Poptr1|76121  
AT5G05080.1 Poptr1|716742,Poptr1|734663  
AT1G64230.1 Poptr1|734368,Poptr1|561006,Poptr1|693395,Poptr1|738992  
AT3G13550.1 Poptr1|48678  
AT5G25760.1 Poptr1|683083,Poptr1|654010  
AT3G24515.1 Poptr1|747349  
AT5G50870.1 Poptr1|666735,Poptr1|662201  
AT1G16890.2 Poptr1|583035,Poptr1|568821  
AT3G20060.1,AT1G50490.1 Poptr1|557890,Poptr1|691341  
AT1G63800.1,AT5G41340.1 Poptr1|347989,Poptr1|572278,Poptr1|683679,Poptr1|646645  
AT3G46460.1 Poptr1|659699,Poptr1|696872,Poptr1|659697,Poptr1|696873  
AT4G27960.2,AT5G53300.1 Poptr1|661451,Poptr1|640393,Poptr1|586577  
AT3G57870.1 Poptr1|651102  
AT2G18600.1 Poptr1|719430,Poptr1|697294,Poptr1|703429  
AT1G14400.1,AT2G02760.1 Poptr1|744130,Poptr1|730050,Poptr1|702453  
AT5G41700.4  
AT2G16740.1  
AT2G32790.1  
AT1G78870.1  
AT2G46030.1  
AT5G59300.1  
AT3G55380.1  
AT3G08690.1  
AT4G36800.1  
AT5G62540.1  
Poptr1|98102,Poptr1|708193  
Poptr1|56911  
Poptr1|590984  
Poptr1|659853,Poptr1|655925  
Poptr1|584236  
Poptr1|700914  
Poptr1|556640  
Poptr1|591149,Poptr1|684416,Poptr1|674243,Poptr1|677884  
Poptr1|105369  
Poptr1|551921,Poptr1|59421  
AT3G13530.1,AT3G07980.1 Poptr1|71820  
Poptr1|655009,Poptr1|650913  
Poptr1|650916  
Poptr1|650914  
AT2G17350.1 Poptr1|54242  
AT1G27290.1 Poptr1|712452,Poptr1|708759  
AT5G18260.1 Poptr1|573893,Poptr1|571236  
AT5G24740.1 Poptr1|65835  
AT3G10150.1 Poptr1|576226  
Poptr1|109207  
AT3G18690.1 Poptr1|595384,Poptr1|596710,Poptr1|562425,Poptr1|584484  
AT5G65207.1,AT5G10040.1 Poptr1|650780,Poptr1|590327,Poptr1|562657  
AT5G01570.1 Poptr1|701640,Poptr1|570350  
AT3G08880.1  
AT2G17270.1 Poptr1|595018  
AT5G14040.1 Poptr1|65029  
Poptr1|71866  
Poptr1|571621  
Poptr1|575439,Poptr1|662210  
Poptr1|679686  
AT3G14760.1 Poptr1|584887,Poptr1|550356

AT4G29735.1 Poptr1|673385  
Poptr1|653261  
AT2G39950.1 Poptr1|563981,Poptr1|698528  
AT5G43745.1,AT5G02940.1 Poptr1|354542  
AT1G13310.1 Poptr1|566661  
AT4G39300.1 Poptr1|556464,Poptr1|697274  
AT1G25240.1,AT1G68110.1 Poptr1|354345  
AT1G14686.1,AT2G01920.1  
AT5G56780.1,AT5G56770.1 Poptr1|352075  
AT4G26170.1  
AT5G16720.1 Poptr1|696515,Poptr1|714147,Poptr1|698177,Poptr1|645234  
AT4G13630.1,AT1G04890.1 Poptr1|668390,Poptr1|645422  
AT1G08800.1 Poptr1|680553,Poptr1|586809,Poptr1|346878  
AT1G70750.1  
AT4G13160.1  
AT2G30690.1  
AT4G14010.1 Poptr1|65039,Poptr1|597077,Poptr1|586606  
Poptr1|597078  
AT1G80980.1,AT1G80700.1 Poptr1|554865,Poptr1|63042,Poptr1|554864  
AT5G05200.1 Poptr1|704221  
Poptr1|663462  
Poptr1|105822  
AT5G54540.1 Poptr1|569043,Poptr1|571447  
AT2G31190.1 Poptr1|72882  
Poptr1|551040  
AT1G76660.1 Poptr1|652293,Poptr1|550698  
AT5G48655.1 Poptr1|573353,Poptr1|692063  
AT3G07200.1  
AT3G01120.1 Poptr1|688950  
AT3G57050.1 Poptr1|576184  
AT1G33320.1  
Poptr1|351427  
Poptr1|589161  
AT4G37710.1,AT2G22880.1 Poptr1|563344,Poptr1|571986  
AT2G43060.1 Poptr1|552832,Poptr1|700546  
AT1G73090.1 Poptr1|567813  
Poptr1|567812  
AT2G41750.1 Poptr1|560511  
Poptr1|580176  
AT2G43990.1 Poptr1|99543,Poptr1|562084  
AT1G13450.1 Poptr1|687036,Poptr1|657418  
AT3G25990.1  
AT4G13520.1 Poptr1|565848,Poptr1|682364  
AT3G24280.1  
AT3G26740.1 Poptr1|683602,Poptr1|554697  
Poptr1|572879  
AT4G34590.1 Poptr1|556499,Poptr1|686696,Poptr1|710135,Poptr1|593898,Poptr1|694800  
AT5G49450.1 Poptr1|659068,Poptr1|572616,Poptr1|564400,Poptr1|710459  
AT2G18160.1,AT1G75390.1  
AT3G62420.1  
Poptr1|719594  
AT1G47570.1 Poptr1|744680  
Poptr1|573616  
AT2G16860.1 Poptr1|556653  
AT2G16070.2 Poptr1|648560,Poptr1|557302  
AT5G53280.1 Poptr1|586574,Poptr1|569474  
AT5G05190.1 Poptr1|581087  
AT3G04950.1 Poptr1|699811  
AT5G22875.1 Poptr1|673402  
AT5G34850.1 Poptr1|690387  
AT2G27190.1 Poptr1|685415,Poptr1|721928,Poptr1|694183,Poptr1|346754  
AT3G46120.1,AT1G56360.1,AT2G18130.1,AT4G36350.1,AT1G52940.1  
AT2G16430.2  
Poptr1|560800,Poptr1|655607,Poptr1|679003,Poptr1|578237  
AT5G14950.1 Poptr1|577532  
Poptr1|564498  
Poptr1|549487  
AT4G33640.1 Poptr1|577296,Poptr1|718508  
ATMG00290.1,AT2G07734.1 Poptr1|101791  
ATCG00380.1  
Poptr1|592416  
AT3G59660.1 Poptr1|582752  
AT3G44380.1 Poptr1|691325  
AT3G14870.1,AT1G53380.1 Poptr1|728288,Poptr1|585494  
AT2G45260.1 Poptr1|342688  
AT5G58960.1 Poptr1|650190  
AT1G29300.1 Poptr1|555635,Poptr1|568669  
AT3G60680.1 Poptr1|342684,Poptr1|730821  
AT4G33320.1,AT4G34080.1  
AT4G36100.1  
AT2G32130.1  
Poptr1|571886

Poptr1|574494  
 AT4G17000.1 Poptr1|677420,Poptr1|691776,Poptr1|557575  
 AT2G26230.1 Poptr1|698784  
 AT4G26965.1 Poptr1|691157,Poptr1|343609  
 AT5G46560.1 Poptr1|589966,Poptr1|591640  
 AT5G52070.1,AT5G42670.1 Poptr1|657261  
 AT1G44960.1 Poptr1|548136  
 Poptr1|350516  
 AT4G32295.1 Poptr1|694980,Poptr1|702017  
 AT1G14710.1 Poptr1|720808  
 AT5G53330.1 Poptr1|61230,Poptr1|569461  
 AT5G15870.1 Poptr1|556167  
 AT1G18310.1  
 AT5G21430.1 Poptr1|352614  
 AT4G31720.1 Poptr1|669224  
 AT5G18440.1 Poptr1|563502,Poptr1|567851  
 AT4G01897.1 Poptr1|684253  
 Poptr1|572569  
 AT3G60660.1 Poptr1|109019  
 AT1G21600.1 Poptr1|551414  
 AT2G18050.1 Poptr1|655435,Poptr1|679169  
 AT2G30620.1 Poptr1|551082,Poptr1|559654  
 AT1G06760.1  
 Poptr1|552493  
 Poptr1|579186  
 Poptr1|571057  
 AT1G17270.1,AT5G50420.1 Poptr1|684993  
 AT1G53770.1  
 AT3G13940.1 Poptr1|597656  
 AT4G16447.1 Poptr1|575904,Poptr1|573080,Poptr1|560197  
 AT4G16444.1 Poptr1|650987  
 AT3G18760.1 Poptr1|578800  
 AT3G10572.1 Poptr1|695466  
 AT5G63780.1,AT5G08750.1 Poptr1|562534,Poptr1|71586  
 AT3G21810.1 Poptr1|562306  
 Poptr1|562307  
 AT5G64830.1 Poptr1|718925  
 AT2G19260.1 Poptr1|702342,Poptr1|98465  
 Poptr1|652863  
 AT4G14180.1 Poptr1|552834  
 AT3G16565.1 Poptr1|697857  
 AT5G63950.1 Poptr1|562497,Poptr1|71553  
 AT2G25170.1 Poptr1|561972,Poptr1|702055  
 AT5G07810.1 Poptr1|355730  
 AT2G18760.1 Poptr1|559717  
 AT2G02090.1 Poptr1|566361  
 AT2G44980.2 Poptr1|591700  
 AT5G19310.1,AT3G06010.1 Poptr1|566280,Poptr1|354439  
 AT3G54280.1 Poptr1|688016  
 AT2G46020.2 Poptr1|731124  
 AT3G57300.1 Poptr1|351483,Poptr1|576236  
 AT3G12810.1 Poptr1|548778,Poptr1|553466  
 AT2G13370.1 Poptr1|723010  
 AT3G19210.1 Poptr1|581508  
 AT5G44800.1 Poptr1|554189,Poptr1|581257  
 AT4G31900.1  
 Poptr1|657056  
 Poptr1|569836  
 Poptr1|641045  
 Poptr1|641047  
 Poptr1|641048  
 Poptr1|723011  
 Poptr1|641046  
 Poptr1|641049  
 AT1G77610.1,AT1G21870.1 Poptr1|551463,Poptr1|694558  
 AT3G10290.1,AT5G04160.1 Poptr1|560460  
 AT3G11320.1,AT5G05820.1 Poptr1|563971,Poptr1|567323  
 AT1G12500.1 Poptr1|548555,Poptr1|646517  
 Poptr1|64308,Poptr1|557982  
 Poptr1|592070  
 AT3G01380.1 Poptr1|683898  
 AT5G03110.1 Poptr1|589407,Poptr1|667765  
 AT2G37100.1  
 AT1G18810.1 Poptr1|581372  
 AT2G02950.1,AT1G14280.1  
 AT1G12800.1 Poptr1|350194  
 AT1G65320.1 Poptr1|596987,Poptr1|58948  
 AT1G79790.1 Poptr1|698310  
 AT3G03140.1 Poptr1|596939,Poptr1|665377  
 AT4G24520.1 Poptr1|342526,Poptr1|694479  
 AT4G30210.1 Poptr1|580484,Poptr1|702173  
 AT3G02280.1 Poptr1|714013

AT3G24710.1  
Poptr1|590623  
Poptr1|568219  
AT3G06460.1,AT3G06470.1 Poptr1|553435,Poptr1|553436  
AT5G59500.1 Poptr1|64360,Poptr1|650244  
AT4G19985.1 Poptr1|581043  
AT4G04190.1 Poptr1|686626  
AT5G37630.1 Poptr1|714194  
AT3G18270.1 Poptr1|569797  
Poptr1|574933  
AT5G66480.1,AT3G50910.1 Poptr1|346400,Poptr1|719554  
AT4G11720.1 Poptr1|63588  
Poptr1|350179  
AT4G28510.1 Poptr1|685913,Poptr1|594617  
AT5G40770.1,AT3G27280.1 Poptr1|549643,Poptr1|736130  
AT2G20530.1  
AT5G44140.1,AT1G03860.1  
AT5G14300.1  
AT2G02500.1 Poptr1|742598  
AT5G13520.1 Poptr1|720268,Poptr1|55574  
AT2G22260.1 Poptr1|560096  
AT5G54920.1,AT4G26990.1 Poptr1|571555,Poptr1|569130  
AT5G40940.1 Poptr1|580767  
Poptr1|354228,Poptr1|564594  
AT1G14345.1 Poptr1|726648  
AT1G44414.1 Poptr1|643614  
Poptr1|596208  
AT3G50460.1,AT3G50480.1,AT3G50470.1,AT3G50450.1 Poptr1|76162  
AT1G74860.1 Poptr1|577538,Poptr1|641576  
AT1G19010.1  
AT1G20960.1,AT2G42270.1 Poptr1|356048,Poptr1|575351  
AT3G27730.1 Poptr1|64772  
AT5G61140.1  
Poptr1|560020  
Poptr1|550710  
Poptr1|550709  
AT5G57880.1 Poptr1|352359  
Poptr1|578721  
AT2G26780.1 Poptr1|691493  
AT3G52260.2 Poptr1|353408  
AT2G40316.1 Poptr1|353726  
AT4G04930.1 Poptr1|580886  
Poptr1|555819  
AT4G38760.1 Poptr1|557121  
AT1G27150.1 Poptr1|565411  
AT1G27110.1  
AT5G60150.1 Poptr1|71948  
AT4G25610.1 Poptr1|575842,Poptr1|570434  
AT4G37680.1,AT4G38320.1 Poptr1|571983  
AT4G30850.1,AT2G24150.1 Poptr1|737935  
AT5G20270.1 Poptr1|98768,Poptr1|736498  
Poptr1|53460  
Poptr1|76491  
Poptr1|653628  
AT1G62730.1 Poptr1|581222  
AT4G33480.1 Poptr1|562525  
AT3G60590.3 Poptr1|591659  
Poptr1|591668  
Poptr1|677578  
AT3G51580.1 Poptr1|577181,Poptr1|560989  
Poptr1|574119  
AT2G14260.1 Poptr1|65336  
AT4G08900.1 Poptr1|572088,Poptr1|692439  
AT4G08870.1  
AT4G21920.1 Poptr1|544817  
Poptr1|569138  
AT5G17850.1 Poptr1|663163  
AT1G54115.1,AT3G14070.1 Poptr1|343295,Poptr1|584118  
AT5G17860.1 Poptr1|571271,Poptr1|573981  
AT1G08960.1 Poptr1|699766  
Poptr1|104428  
Poptr1|593293,Poptr1|573982  
AT4G13200.1 Poptr1|645399  
AT2G40390.1 Poptr1|55451  
AT5G64190.1  
AT5G08720.1 Poptr1|71592  
AT5G47400.1 Poptr1|589881  
AT5G47410.1  
AT4G23890.1 Poptr1|554492,Poptr1|691079  
AT1G64340.1,AT5G41810.1 Poptr1|63442  
AT1G70180.2 Poptr1|696299,Poptr1|565403  
AT3G13200.1 Poptr1|550238

AT5G58700.1 Poptr1|48965  
 AT2G40116.1 Poptr1|345043  
 AT3G55940.1,AT3G08510.1 Poptr1|567270,Poptr1|696783  
 AT3G47220.1,AT3G47290.1  
 AT5G58690.1  
     Poptr1|64254  
     Poptr1|48964  
 AT3G53670.1,AT2G37480.1 Poptr1|560728  
 AT1G44760.1 Poptr1|643633,Poptr1|685288  
 AT5G48830.1 Poptr1|348955  
 AT1G10520.1 Poptr1|55162  
 AT3G26710.1 Poptr1|708084  
 AT2G26300.1 Poptr1|352591,Poptr1|689004  
 AT1G14990.1 Poptr1|696529,Poptr1|698193  
 AT1G67040.1 Poptr1|555864,Poptr1|580811  
 AT2G36630.1 Poptr1|702792  
 AT2G25737.1 Poptr1|344681  
     Poptr1|64004,Poptr1|691264,Poptr1|712422,Poptr1|64005  
     Poptr1|701973  
     Poptr1|719479,Poptr1|593947  
     Poptr1|655289  
 AT4G02920.2,AT1G03340.1 Poptr1|348497,Poptr1|572802  
 AT5G62390.1 Poptr1|699245,Poptr1|701115  
 AT2G45520.1 Poptr1|682886  
 AT2G32640.1 Poptr1|688328  
 AT5G12920.1 Poptr1|62991  
 AT3G07060.1 Poptr1|553151  
 AT2G04360.1 Poptr1|732486  
 AT3G58060.1 Poptr1|690821,Poptr1|351047,Poptr1|62741  
 AT2G39450.1 Poptr1|563840,Poptr1|698612  
     Poptr1|62739  
     Poptr1|102372  
     Poptr1|594031  
 AT5G16690.1 Poptr1|571402  
     Poptr1|571401  
 AT5G42146.1 Poptr1|557129,Poptr1|642956,Poptr1|556588  
 AT1G08710.1 Poptr1|56743  
 AT5G51040.1 Poptr1|666780  
 AT2G36810.1 Poptr1|739607  
 AT5G13950.1 Poptr1|572866,Poptr1|553114  
     Poptr1|102326  
 AT1G64350.1 Poptr1|554473  
     Poptr1|548356  
 AT1G35420.1 Poptr1|702537  
 AT2G38680.1 Poptr1|567878  
     Poptr1|583105,Poptr1|104612  
 AT2G28100.1 Poptr1|723629  
     Poptr1|356335  
 AT1G03390.1 Poptr1|98934  
 AT2G19070.1 Poptr1|578769,Poptr1|96926  
 AT1G28680.1 Poptr1|555712  
 AT5G41040.1 Poptr1|733692,Poptr1|64989,Poptr1|49230,Poptr1|589739  
 AT1G65450.1 Poptr1|698455  
 AT5G48930.1 Poptr1|554899,Poptr1|587193  
 AT3G03480.1,AT5G17540.1 Poptr1|571376,Poptr1|58938,Poptr1|579997,Poptr1|571373,Poptr1|553437  
 AT2G40230.1 Poptr1|55464,Poptr1|564060,Poptr1|583023  
 AT2G23510.1,AT2G25150.1 Poptr1|689330  
 AT1G27620.1 Poptr1|559763,Poptr1|342213  
 AT3G62160.1 Poptr1|572536  
 AT1G32910.1,AT5G16410.1,AT1G78990.1 Poptr1|655562  
 AT5G63560.1,AT3G48720.1  
 AT4G31910.1  
 AT1G65445.1  
 AT5G07080.1,AT3G47170.1  
     Poptr1|573097  
     Poptr1|553189  
     Poptr1|586045,Poptr1|689156,Poptr1|97723  
     Poptr1|106817,Poptr1|105783  
     Poptr1|578723,Poptr1|737972  
     Poptr1|586044  
     Poptr1|571377  
     Poptr1|550428,Poptr1|550430,Poptr1|65750,Poptr1|356774,Poptr1|356772,Poptr1|707917,Poptr1|65747,  
 Poptr1|65752,Poptr1|569287,Poptr1|581298,Poptr1|592246  
     Poptr1|650739  
     Poptr1|571374  
     Poptr1|587977  
     Poptr1|573459  
 AT3G26690.1,AT1G12880.1 Poptr1|350526,Poptr1|63227  
 AT3G12600.1 Poptr1|57924,Poptr1|555066  
 AT1G14860.1,AT2G01670.1 Poptr1|566448,Poptr1|656969  
 AT1G73540.1,AT1G18300.1 Poptr1|575041  
     Poptr1|648141,Poptr1|552937

Poptr1|661329  
Poptr1|569710,Poptr1|106824  
AT1G35660.1 Poptr1|574275  
Poptr1|665756  
AT3G25597.1 Poptr1|354084  
AT1G26140.1  
AT1G68700.1  
AT1G26470.1 Poptr1|656512  
Poptr1|659219  
AT3G05100.1 Poptr1|570959,Poptr1|595493  
AT4G22720.1 Poptr1|679578  
Poptr1|654459  
AT3G26085.1 Poptr1|696329  
AT5G65120.1,AT5G10110.1 Poptr1|562623,Poptr1|71659  
AT1G15870.1,AT1G80720.1 Poptr1|690902  
AT2G39795.1,AT3G55605.1 Poptr1|659621,Poptr1|567368  
AT5G02050.1 Poptr1|735610,Poptr1|653026  
AT5G05990.1  
AT2G39790.1  
AT2G46190.1  
Poptr1|647926  
AT5G05240.1 Poptr1|574117  
AT2G40630.1  
Poptr1|571914  
AT5G16630.1 Poptr1|545464  
AT5G53650.1 Poptr1|666073,Poptr1|569627  
AT4G35910.1 Poptr1|560508  
AT3G12930.1 Poptr1|642593  
Poptr1|727196  
AT3G52040.1 Poptr1|697527,Poptr1|683849  
Poptr1|593605  
AT3G45200.1,AT5G11220.1,AT1G64870.1 Poptr1|344727  
AT1G67920.1,AT1G24600.1 Poptr1|566447,Poptr1|564662,Poptr1|566445  
AT3G29360.1,AT5G15490.1,AT5G39320.1 Poptr1|556397,Poptr1|736425  
AT1G26570.1  
AT3G01010.1  
Poptr1|564284,Poptr1|566943  
AT3G17740.1 Poptr1|97004  
AT2G20725.1 Poptr1|580387  
Poptr1|595219,Poptr1|587957  
AT4G14870.1 Poptr1|564847  
AT3G51790.1 Poptr1|554966  
Poptr1|590719  
AT2G47760.1 Poptr1|731888  
AT3G25805.1 Poptr1|566645  
Poptr1|562755  
AT4G11175.1 Poptr1|668924,Poptr1|654013  
AT1G65000.1 Poptr1|663286  
AT5G01320.1,AT4G33070.1 Poptr1|701635,Poptr1|560932  
AT5G01330.1  
AT5G54960.1  
Poptr1|699046,Poptr1|585869  
Poptr1|674593  
Poptr1|641496  
AT3G13275.1 Poptr1|642674,Poptr1|582556,Poptr1|562451,Poptr1|558395  
AT2G43250.1 Poptr1|103219,Poptr1|594479  
AT1G07130.1 Poptr1|559587  
AT1G73177.1 Poptr1|647861,Poptr1|47426  
AT4G18372.1 Poptr1|575765  
AT5G48520.1 Poptr1|688387  
AT3G57570.1 Poptr1|695522  
Poptr1|560538  
AT5G45170.1 Poptr1|575523  
AT1G13635.1 Poptr1|659018,Poptr1|656729  
AT5G44680.1 Poptr1|63272,Poptr1|345090,Poptr1|711860,Poptr1|55422  
AT5G57970.1 Poptr1|578745,Poptr1|344491  
AT1G75090.1 Poptr1|347722  
AT3G12710.1  
AT1G15970.1,AT1G80850.1  
Poptr1|659019  
Poptr1|582686  
Poptr1|677241  
AT4G02790.1 Poptr1|694695  
AT2G45280.1 Poptr1|572093  
AT5G52960.1 Poptr1|661437,Poptr1|668095  
AT5G41580.1 Poptr1|350281  
AT1G08910.1  
AT5G62840.1 Poptr1|733292  
AT3G52360.1,AT2G35850.1 Poptr1|561177,Poptr1|576459  
AT1G47640.1 Poptr1|551894,Poptr1|591872  
AT1G44770.1 Poptr1|559223,Poptr1|684504  
AT5G11070.1 Poptr1|349628,Poptr1|553806,Poptr1|654193



AT1G65700.1 Poptr1|691506  
 AT4G02425.1 Poptr1|572694,Poptr1|552440  
 AT3G43684.1  
 Poptr1|593656,Poptr1|96883,Poptr1|595171,Poptr1|585183,Poptr1|591385,Poptr1|589245,Poptr1|593439,  
 Poptr1|72259,Poptr1|597570,Poptr1|581816,Poptr1|593167,Poptr1|587980,Poptr1|355528,Poptr1|591229,Poptr1|568  
 613,Poptr1|587094,Poptr1|583979  
 AT5G13100.1 Poptr1|708762,Poptr1|554746  
 AT3G26950.1 Poptr1|691663  
 AT3G46200.1 Poptr1|54765  
 AT4G31150.1 Poptr1|577785  
 AT5G58920.1 Poptr1|64300,Poptr1|682514  
 AT3G56910.1 Poptr1|560310,Poptr1|576080  
 Poptr1|591338  
 AT2G36895.1 Poptr1|576802  
 AT1G16250.1 Poptr1|725585  
 AT2G24540.1 Poptr1|689087  
 AT3G61350.1 Poptr1|572245  
 AT1G30090.1 Poptr1|561242  
 AT1G55270.1 Poptr1|555226,Poptr1|547631  
 Poptr1|561959  
 AT2G32415.1 Poptr1|552784  
 AT3G21350.1 Poptr1|690509  
 AT5G14710.1 Poptr1|641579  
 AT4G16060.1 Poptr1|697802  
 AT1G77400.1 Poptr1|651446  
 AT1G21695.1  
 AT2G43190.1 Poptr1|62849  
 AT1G19530.1 Poptr1|643108,Poptr1|694779  
 AT4G21770.1 Poptr1|555355  
 AT4G10925.1 Poptr1|554506  
 AT4G23960.1  
 Poptr1|63408  
 AT3G20720.1 Poptr1|569071  
 AT4G31430.2 Poptr1|672594,Poptr1|583155,Poptr1|583157  
 AT1G25375.1 Poptr1|698225  
 AT3G06890.1 Poptr1|565590,Poptr1|705122  
 AT5G48335.1 Poptr1|700650  
 AT3G07580.1  
 AT5G61850.1 Poptr1|701070  
 AT5G57660.1 Poptr1|690491,Poptr1|737847  
 AT5G15850.1,AT3G02380.1,AT5G15840.1 Poptr1|704129,Poptr1|714450  
 AT5G24930.1 Poptr1|694947,Poptr1|578336  
 AT2G24790.1  
 AT1G72090.1 Poptr1|592285  
 AT5G55060.1 Poptr1|568544  
 AT5G57860.1 Poptr1|682237  
 ATMG00270.1 Poptr1|678257  
 Poptr1|103818  
 Poptr1|574151  
 AT5G06830.1 Poptr1|745609  
 Poptr1|576283  
 AT4G02160.1,AT5G61710.1 Poptr1|572642,Poptr1|552500  
 AT5G26730.1,AT5G16920.1 Poptr1|560198,Poptr1|575902  
 Poptr1|573857  
 AT1G09812.1 Poptr1|703773,Poptr1|98675  
 AT5G06570.1 Poptr1|576446,Poptr1|653428  
 AT5G62180.1 Poptr1|575758  
 AT5G27320.1,AT3G05120.1 Poptr1|742187,Poptr1|687947  
 AT2G45600.1 Poptr1|730928  
 AT1G47480.1 Poptr1|591916  
 AT3G63010.1 Poptr1|552633,Poptr1|731944  
 AT2G45610.1 Poptr1|342714  
 AT5G16080.1 Poptr1|564508,Poptr1|60386  
 AT1G49640.1,AT1G49650.1,AT2G03550.1,AT1G49660.1,AT3G48700.1,AT3G48690.1,AT1G19190.1  
 Poptr1|61775,Poptr1|722194,Poptr1|54494,Poptr1|54495,Poptr1|97500,Poptr1|596314,Poptr1|102908  
 AT5G23530.1 Poptr1|648080  
 AT1G68620.1  
 Poptr1|556886  
 Poptr1|576116,Poptr1|555093,Poptr1|593248,Poptr1|547785  
 Poptr1|667561  
 Poptr1|592537,Poptr1|579746  
 Poptr1|550279,Poptr1|582891,Poptr1|557359,Poptr1|571184,Poptr1|585194,Poptr1|592980,Poptr1|58232  
 6,Poptr1|552820,Poptr1|587058,Poptr1|571913  
 Poptr1|649531  
 Poptr1|571446  
 Poptr1|591917  
 Poptr1|579302  
 Poptr1|555832  
 Poptr1|581341  
 Poptr1|561889  
 Poptr1|592252,Poptr1|596375,Poptr1|584344,Poptr1|747244,Poptr1|722179,Poptr1|107326  
 Poptr1|591918

Poptr1|744261  
 Poptr1|557364,Poptr1|596315,Poptr1|557367,Poptr1|747624  
 Poptr1|581492,Poptr1|581494,Poptr1|557356,Poptr1|581497  
 Poptr1|596317  
 Poptr1|557360  
 Poptr1|593491  
 Poptr1|65869,Poptr1|586799  
 Poptr1|586846  
 AT3G16510.1 Poptr1|60588,Poptr1|565731,Poptr1|671616,Poptr1|677246,Poptr1|570806  
 AT1G09070.1  
 AT4G15740.1,AT4G15755.1  
 AT3G62780.1  
 AT3G05440.1  
 AT5G54080.1 Poptr1|691860  
 AT1G48550.1 Poptr1|733107  
 AT1G04650.1 Poptr1|63099,Poptr1|554815  
 AT3G63390.1 Poptr1|346930  
 AT3G56650.1 Poptr1|344080  
 AT4G13140.1 Poptr1|343153  
 AT1G48330.1,AT3G17580.1 Poptr1|697792  
 AT4G00990.1 Poptr1|574745  
 AT3G07610.1 Poptr1|558603,Poptr1|71792  
 AT1G11950.1,AT1G62310.1 Poptr1|568077,Poptr1|99335  
 AT1G09060.3 Poptr1|570810,Poptr1|581863  
 AT3G63290.1 Poptr1|551139  
 AT4G01900.1 Poptr1|692244  
 AT4G17010.1 Poptr1|569409  
 AT4G14590.1 Poptr1|64646  
 Poptr1|568481  
 AT5G52950.1 Poptr1|569457  
 Poptr1|106986  
 AT1G18700.2 Poptr1|743706  
 Poptr1|556145  
 AT1G79380.1 Poptr1|724254  
 AT5G14420.1,AT3G01650.1 Poptr1|706825  
 AT5G63970.1 Poptr1|718620,Poptr1|715797  
 Poptr1|564153  
 Poptr1|666549,Poptr1|662072  
 Poptr1|560073  
 Poptr1|721022  
 AT1G08480.1 Poptr1|558370  
 AT2G37035.1 Poptr1|589453  
 Poptr1|355501  
 AT1G29850.2 Poptr1|586970  
 AT3G54750.1 Poptr1|352178,Poptr1|576451  
 AT4G17540.1 Poptr1|349789  
 AT1G25400.1,AT1G68440.1 Poptr1|686325,Poptr1|566609  
 AT1G16870.1 Poptr1|700078  
 AT5G43050.1 Poptr1|699281  
 AT5G42470.1 Poptr1|685439,Poptr1|550881  
 AT1G10030.1 Poptr1|643976  
 AT2G31490.1 Poptr1|560685  
 AT1G49510.1 Poptr1|581468  
 Poptr1|72143  
 AT3G62370.1 Poptr1|572596  
 AT3G62810.1 Poptr1|700445  
 AT4G21530.1 Poptr1|713678  
 AT2G20820.2 Poptr1|571784,Poptr1|670553  
 AT1G79350.1 Poptr1|656383,Poptr1|659374  
 Poptr1|567117,Poptr1|564151  
 Poptr1|656384,Poptr1|659373  
 Poptr1|584324  
 Poptr1|656387  
 Poptr1|656386  
 Poptr1|656385  
 AT5G13830.1 Poptr1|687353  
 AT3G52110.1 Poptr1|649963,Poptr1|641368  
 Poptr1|351561  
 AT3G18160.1,AT1G48635.1 Poptr1|574968,Poptr1|345814  
 AT3G53470.2 Poptr1|576635  
 Poptr1|675949  
 AT1G16040.1 Poptr1|554905  
 AT3G47550.3,AT5G62460.1 Poptr1|659309,Poptr1|686408  
 AT4G02075.1 Poptr1|664363,Poptr1|644832  
 AT1G14260.1  
 AT2G02960.5  
 AT1G02610.1  
 Poptr1|582756  
 Poptr1|644833  
 AT2G36145.1 Poptr1|695178  
 AT2G02410.1 Poptr1|553563  
 AT5G52290.1 Poptr1|356235

AT1G79390.1 Poptr1|564154  
Poptr1|659368  
AT4G16450.1 Poptr1|701230,Poptr1|560196  
AT3G15110.1 Poptr1|568630  
AT2G04690.1 Poptr1|708172  
AT1G28695.1,AT1G28700.1,AT1G28710.1 Poptr1|100920,Poptr1|59393  
Poptr1|347777  
Poptr1|347778  
AT2G04340.1 Poptr1|596325  
Poptr1|64374  
AT2G33850.1,AT1G28400.1 Poptr1|693951,Poptr1|671016  
AT1G80420.1 Poptr1|48820  
AT3G10700.1 Poptr1|652828  
Poptr1|578960  
AT3G08840.2 Poptr1|560967  
AT5G43500.1 Poptr1|658391  
Poptr1|681717  
AT2G05120.1 Poptr1|710294  
Poptr1|573082  
AT5G52980.1 Poptr1|712673  
AT1G60420.1 Poptr1|565873,Poptr1|565872,Poptr1|678961,Poptr1|565876  
AT4G31240.1 Poptr1|98482  
Poptr1|670127,Poptr1|642903,Poptr1|715540,Poptr1|565875,Poptr1|565871,Poptr1|108162  
Poptr1|565874  
Poptr1|657367  
Poptr1|657365  
Poptr1|597206  
Poptr1|100068  
AT5G19130.1 Poptr1|64801  
AT4G28240.1 Poptr1|574596,Poptr1|748518,Poptr1|663544  
AT5G51960.1 Poptr1|696926,Poptr1|659816  
AT5G43210.1 Poptr1|64499,Poptr1|64447,Poptr1|64453  
AT1G28150.1 Poptr1|647785  
AT2G20980.1 Poptr1|649220  
AT1G77540.1 Poptr1|716669  
AT1G21770.1  
AT5G23220.1,AT5G23230.1 Poptr1|583484  
AT1G59600.1 Poptr1|644031  
AT2G04790.2 Poptr1|573058  
AT4G06676.1 Poptr1|596720  
AT3G29280.1 Poptr1|577714  
AT5G42370.1 Poptr1|715748  
AT1G51400.1,AT3G21055.1 Poptr1|549240,Poptr1|650065  
AT3G02860.2 Poptr1|552894  
AT5G08320.1 Poptr1|682131  
AT2G45130.1 Poptr1|740087,Poptr1|552014  
AT2G26660.1 Poptr1|717404,Poptr1|689185  
AT5G15330.1 Poptr1|701847  
AT5G20150.1  
Poptr1|585368  
Poptr1|107450  
Poptr1|106256  
Poptr1|702011,Poptr1|561890  
Poptr1|64117  
AT5G37480.1 Poptr1|663154  
AT2G35290.1 Poptr1|676545,Poptr1|670403  
AT4G37925.1 Poptr1|694588  
Poptr1|643562  
AT4G22000.1 Poptr1|732868,Poptr1|661529  
AT1G65720.1 Poptr1|556060,Poptr1|592848  
AT4G24700.1 Poptr1|355937,Poptr1|575237,Poptr1|355934  
AT2G39170.1 Poptr1|563699,Poptr1|567661  
AT3G51610.1 Poptr1|577159  
AT1G20190.1 Poptr1|652130,Poptr1|709919  
AT4G38210.1 Poptr1|556752,Poptr1|595029  
AT1G26770.1 Poptr1|659295,Poptr1|696712  
AT2G40610.1 Poptr1|665631,Poptr1|688083  
AT3G03220.1 Poptr1|546535,Poptr1|592822  
AT3G15370.1 Poptr1|743024  
AT1G65680.1 Poptr1|572072  
AT2G20750.1,AT4G28250.1 Poptr1|730479,Poptr1|48159  
AT2G28950.1 Poptr1|691396,Poptr1|723264,Poptr1|682432  
AT2G37640.1 Poptr1|695426  
AT4G01630.1 Poptr1|552403  
AT1G69530.3  
AT2G03090.1  
AT5G05290.1  
AT2G45110.1,AT3G60570.1  
AT1G62980.1,AT1G12560.1  
AT3G55500.1  
AT5G02260.1  
Poptr1|571235,Poptr1|556331

Poptr1|58393  
Poptr1|653202  
Poptr1|675669  
Poptr1|576797  
Poptr1|552404  
AT4G27750.1 Poptr1|580605  
AT2G25730.1 Poptr1|685526  
Poptr1|578129  
AT5G27830.1 Poptr1|581892,Poptr1|699720  
AT1G35340.1 Poptr1|574230  
AT5G51545.1 Poptr1|666908  
AT5G43680.1 Poptr1|551102  
AT5G18400.2 Poptr1|52056,Poptr1|643416  
AT5G37055.1 Poptr1|571857  
AT1G76980.1,AT1G21390.1 Poptr1|347189,Poptr1|559307  
AT1G13730.1,AT2G03640.2 Poptr1|566922,Poptr1|353940  
AT5G43960.1 Poptr1|573372,Poptr1|692005  
AT5G60980.2 Poptr1|596417  
AT1G69250.1  
AT3G07250.1  
Poptr1|697897  
AT3G16200.1 Poptr1|48895,Poptr1|685010  
AT3G59650.1 Poptr1|683400  
AT4G32930.1 Poptr1|695067  
AT5G52110.1 Poptr1|701167  
AT4G02485.1 Poptr1|731881  
AT1G21840.1 Poptr1|548690  
AT4G11270.1 Poptr1|693410  
Poptr1|548413  
AT4G14310.2 Poptr1|354599  
Poptr1|565786  
AT2G35260.1 Poptr1|590000  
AT4G17840.1  
AT3G50330.1,AT5G67060.1 Poptr1|651077,Poptr1|591967,Poptr1|347647,Poptr1|76104  
AT3G21330.1 Poptr1|548935  
AT5G09750.1 Poptr1|654633,Poptr1|650581  
AT4G00120.1  
Poptr1|594423  
AT5G02130.1 Poptr1|710908  
AT2G36835.1 Poptr1|702766  
Poptr1|681526  
AT1G31940.1,AT2G35585.1 Poptr1|349947  
AT1G80940.1 Poptr1|62787,Poptr1|693199  
AT1G48140.1 Poptr1|343163  
AT2G03060.1 Poptr1|567029,Poptr1|564218  
AT1G77950.1,AT1G22130.1,AT1G77980.1 Poptr1|562641  
AT1G18750.1  
AT1G69540.1  
Poptr1|643714  
AT5G23395.1 Poptr1|567758  
AT3G13175.1 Poptr1|560209,Poptr1|691823  
AT4G16400.1 Poptr1|575889  
AT3G23170.1,AT4G14450.1 Poptr1|726384,Poptr1|595823  
AT1G04330.1  
AT5G52190.1 Poptr1|57802  
AT3G01800.1 Poptr1|691627  
AT4G01710.1 Poptr1|684388,Poptr1|703056  
AT5G08060.1 Poptr1|712804  
AT1G55510.1,AT3G13450.1 Poptr1|693134  
AT5G50850.1 Poptr1|690960,Poptr1|647008  
AT1G30120.1,AT2G34590.1 Poptr1|714481,Poptr1|736218  
AT2G20390.1 Poptr1|645565  
Poptr1|573375  
AT5G22580.1 Poptr1|649096,Poptr1|676240,Poptr1|679804  
AT3G25545.1 Poptr1|687206,Poptr1|564440  
AT1G13360.1,AT3G25870.1 Poptr1|686329,Poptr1|566632  
AT5G09270.1 Poptr1|558447,Poptr1|654678  
AT3G52940.1 Poptr1|702804  
AT2G25100.1 Poptr1|344853  
AT5G20170.1 Poptr1|703738  
AT1G06475.1 Poptr1|559491,Poptr1|568452,Poptr1|643376  
AT5G46295.1  
AT1G10200.1 Poptr1|572031,Poptr1|551777  
AT1G01780.1 Poptr1|731048,Poptr1|644430  
AT3G55770.1,AT2G39900.1 Poptr1|698536,Poptr1|720044  
AT3G61230.1,AT2G45800.1  
Poptr1|355852,Poptr1|65296,Poptr1|688485  
Poptr1|649691  
Poptr1|548490  
AT1G27530.1 Poptr1|681958  
AT1G80860.1 Poptr1|674896  
Poptr1|647173

AT5G21070.1 Poptr1|594926,Poptr1|47143  
AT1G26090.1 Poptr1|566682  
Poptr1|354120  
AT3G09050.1 Poptr1|560878  
AT3G52170.1 Poptr1|567709  
AT5G58210.1 Poptr1|584519  
AT5G58200.1 Poptr1|653536  
AT5G66930.2 Poptr1|655186  
AT5G50720.1,AT4G24960.1 Poptr1|575390,Poptr1|662181  
AT1G74520.1 Poptr1|690164,Poptr1|728631  
AT5G62490.1  
AT1G69700.1  
AT2G42820.1  
Poptr1|703291  
Poptr1|572913  
AT5G66090.1 Poptr1|593803  
AT5G13680.1 Poptr1|55547  
AT5G51510.1 Poptr1|662465  
AT3G26750.1 Poptr1|76349,Poptr1|597543  
AT3G22990.1 Poptr1|657228  
AT1G05205.1 Poptr1|578604  
AT2G44760.1 Poptr1|342652  
AT2G37560.1 Poptr1|349913  
AT3G04020.1 Poptr1|106745  
Poptr1|705177  
AT1G49890.1,AT3G19570.2 Poptr1|54542,Poptr1|65272  
AT4G25190.1 Poptr1|356784  
AT4G30710.1,AT2G24070.1 Poptr1|737954  
AT3G60000.1,AT2G44190.1 Poptr1|560048,Poptr1|672033  
AT4G30740.1  
Poptr1|347597  
Poptr1|653603  
AT1G16650.1 Poptr1|562888  
AT4G04880.1 Poptr1|705259  
AT2G31083.1,AT2G31085.1 Poptr1|574352  
AT2G31082.1  
Poptr1|568621  
AT4G29890.1 Poptr1|351645  
AT3G09150.2 Poptr1|723000,Poptr1|549046  
AT3G12210.2 Poptr1|684431  
AT3G56290.1 Poptr1|665617  
AT5G17280.1 Poptr1|563235  
AT1G08250.1,AT2G27820.1 Poptr1|721464,Poptr1|594833  
AT1G11790.1 Poptr1|694084,Poptr1|568031  
AT3G07630.1 Poptr1|565256  
AT3G44720.1,AT5G22630.1  
AT5G62575.2 Poptr1|688484,Poptr1|661965  
AT3G47833.1  
AT1G21790.1 Poptr1|559239,Poptr1|643617  
AT2G38570.1 Poptr1|695352  
AT2G18410.1 Poptr1|714034  
Poptr1|580807  
AT1G65270.1 Poptr1|702493  
AT4G04614.1 Poptr1|559588  
AT2G35612.1,AT1G31670.1 Poptr1|596850  
AT4G14940.1 Poptr1|566257  
AT4G12290.1 Poptr1|744008  
AT4G12270.1  
AT1G62810.1,AT3G43670.1  
AT4G12280.1  
Poptr1|726562,Poptr1|591022  
AT1G09010.1 Poptr1|687932  
AT5G55610.1 Poptr1|642292  
AT2G39725.1 Poptr1|48530  
AT3G52210.3 Poptr1|659984  
Poptr1|581414  
AT1G13330.1 Poptr1|564514  
AT2G20410.1 Poptr1|573708,Poptr1|571088  
AT2G34585.1 Poptr1|746564  
AT2G24970.1 Poptr1|669196  
AT1G09560.1 Poptr1|60549,Poptr1|687891  
AT3G62020.1 Poptr1|572505,Poptr1|552405  
AT1G18980.1,AT1G18970.1,AT1G74820.1 Poptr1|575072  
AT3G10080.1 Poptr1|563582,Poptr1|660166,Poptr1|55694  
AT5G20630.1 Poptr1|675842  
AT5G61750.1 Poptr1|570391,Poptr1|575494  
AT1G10460.1 Poptr1|565388  
AT5G39150.1,AT5G39160.1,AT5G39130.1,AT3G04200.1,AT5G39190.1,AT5G39180.1,AT5G39110.1,AT5G39120.1,A  
T3G05950.1  
Poptr1|665360,Poptr1|591472,Poptr1|591240,Poptr1|571145,Poptr1|591239,Poptr1|573788,Poptr1|57378  
6,Poptr1|101997,Poptr1|56685,Poptr1|597538  
AT3G05930.1

AT5G26700.1  
AT1G72610.1  
AT5G38940.1,AT4G14630.1,AT5G38960.1,AT5G38930.1,AT5G38910.1  
AT5G38950.1  
AT3G04170.1,AT3G04150.1,AT3G04180.1,AT3G04190.1  
Poptr1|564180,Poptr1|563539,Poptr1|594069  
Poptr1|59514  
Poptr1|98149,Poptr1|101774,Poptr1|582581,Poptr1|98165,Poptr1|98152,Poptr1|550598,Poptr1|98150,Poptr1|550606  
8  
Poptr1|556689,Poptr1|697156,Poptr1|556693,Poptr1|557030,Poptr1|546287,Poptr1|556691,Poptr1|556688  
Poptr1|550602,Poptr1|98161,Poptr1|591242  
Poptr1|747329  
Poptr1|593478  
Poptr1|663029,Poptr1|108037  
Poptr1|591473  
Poptr1|674028  
AT4G29510.1,AT2G19670.1 Poptr1|672433,Poptr1|561069  
AT3G12270.1 Poptr1|62880  
AT3G20020.1 Poptr1|696218  
AT1G04870.2 Poptr1|705132  
Poptr1|571961  
AT4G26240.1 Poptr1|653331  
Poptr1|679276  
AT5G22130.1 Poptr1|639801  
AT4G33140.1 Poptr1|561540  
AT1G67550.1 Poptr1|345492  
Poptr1|676935  
AT4G22550.1 Poptr1|554202  
AT3G27930.1 Poptr1|683905  
AT4G01290.1 Poptr1|552204,Poptr1|572302  
Poptr1|545602  
AT3G15420.1 Poptr1|579492,Poptr1|568928  
AT3G21400.1 Poptr1|744470  
Poptr1|565733  
AT5G50780.1 Poptr1|699358,Poptr1|733700  
AT4G36270.1,AT4G36290.1,AT4G36280.1 Poptr1|703398  
AT4G24970.1,AT5G13130.1  
AT1G19100.1  
AT5G03455.1 Poptr1|676077  
AT3G24160.1 Poptr1|690908,Poptr1|693220  
AT5G03860.1 Poptr1|57656  
Poptr1|570219  
AT3G53440.1 Poptr1|98489,Poptr1|577781,Poptr1|98495  
AT4G12230.1 Poptr1|581205  
Poptr1|646484  
AT5G65250.1 Poptr1|558514,Poptr1|75703  
AT2G47910.1 Poptr1|98727  
Poptr1|578826  
AT5G53070.1 Poptr1|661542,Poptr1|591217,Poptr1|586761  
AT1G80690.1 Poptr1|647151,Poptr1|708603  
AT5G47310.1 Poptr1|712381,Poptr1|589895  
AT1G47740.1 Poptr1|692502,Poptr1|689557  
AT5G25170.1 Poptr1|561964,Poptr1|669130  
AT4G17486.1  
AT2G25190.1  
Poptr1|686717,Poptr1|556438  
AT4G17240.1 Poptr1|351242,Poptr1|575896  
AT1G79190.1 Poptr1|562860  
AT1G75980.1 Poptr1|692994  
Poptr1|652125  
AT1G28530.1 Poptr1|555735  
Poptr1|674306  
AT3G03210.1 Poptr1|678526,Poptr1|545543  
AT4G17430.1 Poptr1|553897  
Poptr1|589886  
AT4G26740.1,AT5G55240.1 Poptr1|725917  
AT1G70680.1,AT1G70670.1 Poptr1|726818,Poptr1|696503  
AT4G13330.1 Poptr1|564994  
AT2G33380.1  
AT5G29560.1  
AT1G23240.1  
AT1G23250.1  
AT4G19003.1 Poptr1|676613  
AT4G26980.1 Poptr1|568556  
AT2G20515.1 Poptr1|72887,Poptr1|346841  
AT2G33585.1 Poptr1|652267,Poptr1|678997  
AT2G34050.1 Poptr1|647908  
AT3G13882.1 Poptr1|689656  
AT1G60500.1,AT1G60540.1  
Poptr1|645731,Poptr1|48703,Poptr1|592435,Poptr1|675203,Poptr1|60740,Poptr1|587864  
AT1G60530.1

Poptr1|349308,Poptr1|747364  
 Poptr1|646706,Poptr1|747362,Poptr1|645730  
 AT3G61770.1 Poptr1|348080  
 AT1G24350.1,AT1G67600.1 Poptr1|55010  
 AT3G21610.1 Poptr1|568517  
 Poptr1|572396  
 Poptr1|657401  
 Poptr1|572989,Poptr1|711445  
 Poptr1|572990  
 AT3G24420.1 Poptr1|717720  
 AT3G03990.1 Poptr1|681953,Poptr1|682882  
 AT4G37470.1 Poptr1|558923,Poptr1|349799  
 Poptr1|701411  
 AT5G32482.1,AT5G33303.1,AT4G08056.1,AT3G29470.1,AT2G04135.1,AT3G30843.1 Poptr1|53271  
 AT3G29265.1,AT3G29220.1  
 AT1G61250.1,AT1G11180.1 Poptr1|571774,Poptr1|694023,Poptr1|568277  
 AT1G32050.1 Poptr1|711857,Poptr1|676623  
 Poptr1|675791  
 AT5G07050.1 Poptr1|576115,Poptr1|683550,Poptr1|712491,Poptr1|560335  
 AT5G13670.1 Poptr1|353510  
 AT5G64700.1 Poptr1|580005,Poptr1|691723  
 AT4G19185.1,AT5G45370.2 Poptr1|703839  
 AT5G47470.1 Poptr1|343411,Poptr1|589864  
 AT1G09380.1 Poptr1|581635  
 AT4G08290.1 Poptr1|559219  
 AT1G75500.1 Poptr1|694811,Poptr1|643041  
 AT2G39510.1 Poptr1|567472,Poptr1|656050  
 AT3G30340.1 Poptr1|569240,Poptr1|550490,Poptr1|572488  
 AT1G21890.1 Poptr1|692716,Poptr1|559220  
 AT3G28050.1 Poptr1|64888  
 AT2G37460.1 Poptr1|351743  
 AT4G30420.1 Poptr1|578672,Poptr1|561389  
 AT1G25270.1,AT1G68170.1 Poptr1|65162,Poptr1|63584  
 AT3G56620.1,AT2G40900.1  
 AT4G24980.1  
 AT1G43650.1  
 AT3G45870.1  
 AT4G16620.1  
 AT3G53210.1  
 AT1G11450.1,AT1G11460.1,AT4G01440.1,AT4G01450.2,AT1G01070.1,AT4G01430.1  
 AT1G44800.1,AT4G08300.1  
 AT3G28080.1,AT3G28070.1,AT5G40210.1,AT5G40230.1,AT3G28130.2,AT3G28100.1,AT5G40240.1  
 AT4G15540.1  
 AT3G28060.1  
 AT2G37450.1  
 AT4G28040.1  
 Poptr1|569667  
 Poptr1|674086  
 Poptr1|569235,Poptr1|569232  
 Poptr1|569236  
 Poptr1|72869  
 Poptr1|588291,Poptr1|76372,Poptr1|597508  
 Poptr1|569234  
 Poptr1|711315  
 Poptr1|582477,Poptr1|354400  
 Poptr1|639794,Poptr1|575128,Poptr1|647356  
 Poptr1|590619  
 Poptr1|561388,Poptr1|352409  
 Poptr1|578673  
 AT1G29790.1 Poptr1|568460,Poptr1|100335  
 AT3G05390.1 Poptr1|570814  
 AT5G40830.1,AT3G27230.1 Poptr1|652029,Poptr1|643000  
 AT4G01240.1 Poptr1|348025  
 Poptr1|583556  
 Poptr1|593154,Poptr1|596821  
 Poptr1|595821,Poptr1|595916  
 Poptr1|658636  
 Poptr1|552898,Poptr1|556002,Poptr1|556385  
 AT2G25800.1 Poptr1|561747  
 AT5G06970.1 Poptr1|708460  
 AT1G04470.1,AT2G33420.1 Poptr1|54974,Poptr1|564974  
 Poptr1|58668  
 Poptr1|578052  
 Poptr1|668894  
 Poptr1|691152  
 AT5G42520.1 Poptr1|550928,Poptr1|715376  
 AT2G21240.1 Poptr1|546149  
 AT1G14685.1,AT2G01930.1 Poptr1|726756,Poptr1|564713  
 AT2G35550.1 Poptr1|590087  
 AT4G38910.1  
 AT1G68120.1  
 Poptr1|721839

Poptr1|580640,Poptr1|355123,Poptr1|681547,Poptr1|580642,Poptr1|569391,Poptr1|675390,Poptr1|59745  
2,Poptr1|661364  
Poptr1|349956  
AT2G38870.1  
Poptr1|576589,Poptr1|566128,Poptr1|674768,Poptr1|558101,Poptr1|595752,Poptr1|593711,Poptr1|74892  
8,Poptr1|579369,Poptr1|579370,Poptr1|579367,Poptr1|566130,Poptr1|660854,Poptr1|658407,Poptr1|579368  
AT3G46860.1  
AT5G43580.1  
Poptr1|595754,Poptr1|576588,Poptr1|653733  
Poptr1|568811  
Poptr1|551072  
AT1G43800.1 Poptr1|52013  
AT5G16240.1,AT3G02630.1 Poptr1|345079,Poptr1|704553  
AT2G43710.1  
Poptr1|567169,Poptr1|57423  
AT1G02260.1 Poptr1|570428  
Poptr1|583419,Poptr1|584317,Poptr1|583420,Poptr1|592843,Poptr1|592846  
Poptr1|678541  
Poptr1|675587,Poptr1|681555  
Poptr1|681554,Poptr1|681264  
Poptr1|673352,Poptr1|678542  
Poptr1|667058  
Poptr1|350245  
Poptr1|575848  
Poptr1|678544  
AT2G17640.1,AT4G35640.1 Poptr1|694390  
AT5G56760.1 Poptr1|592270,Poptr1|701205  
AT1G55920.1,AT3G13110.1 Poptr1|707642  
Poptr1|568698  
Poptr1|595652  
AT1G53670.1 Poptr1|568844  
AT4G21860.1 Poptr1|707506  
AT4G21840.1,AT4G21850.1  
AT4G04840.1  
Poptr1|107860  
Poptr1|583427  
Poptr1|565685  
Poptr1|587179  
AT1G61180.2,AT5G05400.1,AT1G62630.1,AT1G12280.1,AT1G12290.1,AT1G63360.1,AT1G63350.1,AT1G61190.1,AT  
5G63020.1,AT4G10780.1,AT1G12210.1,AT1G61310.1,AT5G43730.1,AT1G12220.1,AT1G15890.1  
Poptr1|49266  
AT4G26090.1 Poptr1|344369  
AT4G27220.1,AT4G27190.1 Poptr1|571475  
AT5G43740.1,AT5G47260.1,AT1G51480.1  
AT1G52660.1,AT3G15700.1  
AT1G61300.1  
AT5G47250.1  
Poptr1|573598,Poptr1|586795,Poptr1|589104,Poptr1|589110,Poptr1|593078,Poptr1|106794  
Poptr1|582890,Poptr1|573671,Poptr1|675446,Poptr1|588347  
Poptr1|579993,Poptr1|61534  
Poptr1|591513,Poptr1|101676,Poptr1|102469  
Poptr1|573665  
Poptr1|579267  
Poptr1|568966  
Poptr1|679711,Poptr1|100238,Poptr1|579995,Poptr1|101014,Poptr1|582100,Poptr1|675440,Poptr1|59448  
2,Poptr1|568952,Poptr1|588351,Poptr1|594015,Poptr1|573760,Poptr1|579519,Poptr1|588341,Poptr1|665212,Poptr1|5  
92525,Poptr1|590943,Poptr1|588346,Poptr1|573757,Poptr1|573730,Poptr1|568968,Poptr1|568953,Poptr1|589103,Pop  
tr1|665201,Poptr1|102707,Poptr1|579755,Poptr1|573542,Poptr1|100239,Poptr1|101368,Poptr1|573539,Poptr1|6792  
99,Poptr1|673950,Poptr1|101367,Poptr1|596330,Poptr1|597256,Poptr1|593481,Poptr1|589109,Poptr1|592527,Poptr1|  
573586  
Poptr1|665317,Poptr1|573574,Poptr1|573729,Poptr1|102826,Poptr1|105742,Poptr1|590942  
Poptr1|102033,Poptr1|101261,Poptr1|102695,Poptr1|568967  
Poptr1|581136,Poptr1|573591,Poptr1|596201,Poptr1|596247,Poptr1|583538,Poptr1|589111,Poptr1|665200  
,Poptr1|573603,Poptr1|573538,Poptr1|675448  
Poptr1|597390,Poptr1|591476,Poptr1|104120,Poptr1|573612  
Poptr1|573672,Poptr1|104872  
Poptr1|588356  
Poptr1|576653  
AT5G18970.1 Poptr1|565301  
AT1G29520.1 Poptr1|727873,Poptr1|746786  
AT1G04560.1 Poptr1|565838  
AT5G46530.1  
Poptr1|657644  
Poptr1|588441  
Poptr1|580780  
AT5G65760.1 Poptr1|563326  
AT5G22860.1 Poptr1|705221,Poptr1|63841,Poptr1|101896,Poptr1|63837,Poptr1|697762  
AT2G24280.1 Poptr1|578779  
AT3G28680.1  
Poptr1|576547  
Poptr1|561993  
Poptr1|63846,Poptr1|679732,Poptr1|677951



Poptr1|63848  
Poptr1|63835,Poptr1|591549  
Poptr1|63842  
Poptr1|717872  
AT3G55460.1 Poptr1|55533,Poptr1|353561  
AT5G18810.1 Poptr1|354880,Poptr1|697853  
AT3G13570.1,AT1G55310.2 Poptr1|701409  
Poptr1|555216,Poptr1|547618  
AT1G68410.1 Poptr1|656842  
AT1G47380.1 Poptr1|551863,Poptr1|703110  
AT1G09160.1 Poptr1|97801,Poptr1|570742  
Poptr1|658859  
Poptr1|658858  
AT1G08840.1 Poptr1|688382  
AT4G19370.1,AT1G31720.1 Poptr1|703828  
AT2G01860.1 Poptr1|73165  
AT2G26570.1,AT4G33390.1 Poptr1|740380  
AT5G55860.1 Poptr1|550223  
AT1G45545.1,AT5G42880.1  
AT3G13190.1  
Poptr1|581386  
Poptr1|644128,Poptr1|71977  
AT1G74880.1 Poptr1|654643  
AT3G09300.1,AT5G02100.1 Poptr1|717366  
AT5G59420.1  
AT3G15940.1,AT1G52420.1 Poptr1|691217  
Poptr1|593431  
AT1G50240.1 Poptr1|702479  
AT5G53420.1,AT4G27900.1 Poptr1|355280  
AT1G80810.1 Poptr1|578270,Poptr1|63033,Poptr1|554873  
AT4G31880.1 Poptr1|561982  
AT5G47690.1 Poptr1|351135  
AT1G15940.1  
AT5G10950.1  
AT1G77600.1  
Poptr1|352312  
Poptr1|575874  
Poptr1|575873  
AT1G63820.1,AT5G41380.1 Poptr1|548435,Poptr1|350258  
AT3G21150.1 Poptr1|567790  
AT1G36310.1 Poptr1|551529  
AT1G04200.1 Poptr1|698048  
Poptr1|564880  
AT2G44360.1 Poptr1|583292  
AT5G57870.1 Poptr1|561350,Poptr1|685497,Poptr1|737966  
AT1G62410.1  
AT2G24050.1  
Poptr1|578297  
Poptr1|566818  
AT5G53020.1 Poptr1|574736,Poptr1|569567  
AT5G53440.1 Poptr1|574762  
Poptr1|661509  
AT3G52115.1 Poptr1|64579  
Poptr1|722745  
AT5G55820.1 Poptr1|65500  
AT2G45080.1,AT3G60550.1 Poptr1|692445,Poptr1|572073  
AT3G63120.1 Poptr1|714972,Poptr1|643309  
AT3G21870.1 Poptr1|562309  
AT2G44740.1 Poptr1|575520,Poptr1|591757,Poptr1|746980  
AT3G05327.1  
AT5G61650.1,AT5G07450.1  
AT1G61000.1 Poptr1|709685  
AT5G61040.1,AT5G08010.1 Poptr1|564301  
AT5G17690.1 Poptr1|574027,Poptr1|571324  
ATCG00180.1 Poptr1|578019  
AT3G57660.1 Poptr1|351564  
AT5G60040.1 Poptr1|49175  
AT4G35800.1 Poptr1|346334  
Poptr1|576328  
Poptr1|593586  
AT4G32250.1 Poptr1|737225,Poptr1|561912  
AT2G01755.1 Poptr1|656985  
AT3G29310.1 Poptr1|577722,Poptr1|545912  
AT3G02010.1 Poptr1|348908  
AT3G08820.1 Poptr1|577100  
AT2G40720.1 Poptr1|571676  
AT5G09950.1 Poptr1|582730  
AT3G22150.1 Poptr1|560130  
AT1G16480.1 Poptr1|695983  
AT4G39952.1 Poptr1|71624  
AT2G36730.1 Poptr1|668579  
AT5G40410.1 Poptr1|346624

AT1G74630.1 Poptr1|59986  
AT2G34400.1 Poptr1|570356  
AT4G37170.1 Poptr1|668646  
AT5G46460.1 Poptr1|100353  
AT1G19720.1,AT3G53360.1,AT4G21300.1,AT2G22410.1,AT2G33760.1,AT1G71420.1,AT1G71490.1,AT4G39530.1,AT5G65570.1,AT2G39620.1,AT3G12770.1,AT4G37380.1,AT1G68930.1,AT5G44230.1,AT2G03380.1,AT5G40405.1,AT3G23330.1,AT3G47840.1,AT2G46050.1,AT4G19220.1,AT4G20770.1,AT1G74600.1,AT3G16610.1,AT3G25970.1,AT5G37570.1,AT3G13880.1,AT3G04750.1,AT1G11290.1,AT3G61170.1,AT3G03580.1,AT4G25270.1,AT1G06140.1,AT4G13650.1,AT5G55740.1,AT1G31430.1,AT3G26630.1,AT5G47460.1,AT5G59200.1,AT5G27110.1,AT3G46790.1,AT5G03800.1,AT2G02980.1,AT1G59720.1,AT5G59600.1,AT2G34370.1,AT4G33170.1,AT1G18485.1,AT3G49140.1,AT2G44880.1,AT1G69350.1,AT3G05340.1,AT4G18520.1,AT3G56550.1,AT1G56570.1,AT3G29230.1,AT3G58590.1,AT5G48910.1,AT1G23450.1,AT3G49170.1,AT1G13410.1,AT3G22690.1,AT1G20230.1,AT2G36980.1,AT1G71460.1,AT1G53600.1,AT3G01580.1,AT5G39350.1,AT3G14330.1,AT4G18750.1,AT5G39680.1,AT1G15510.1,AT1G29710.1,AT1G26900.1,AT3G57430.1,AT4G32430.1,AT5G08490.1,AT3G05240.1,AT3G02330.1,AT3G13770.1,AT1G31920.1,AT2G17210.1,AT3G25060.1  
Poptr1|561490,Poptr1|561808,Poptr1|54731,Poptr1|344961,Poptr1|582951,Poptr1|99303,Poptr1|546331,Poptr1|551386,Poptr1|552656,Poptr1|581687,Poptr1|65031,Poptr1|560528,Poptr1|60562,Poptr1|740387,Poptr1|56085,Poptr1|60584,Poptr1|58057,Poptr1|556673,Poptr1|345141,Poptr1|553193,Poptr1|558109,Poptr1|641134,Poptr1|561131,Poptr1|59894,Poptr1|343053,Poptr1|349352,Poptr1|564398,Poptr1|556121,Poptr1|556285,Poptr1|63283,Poptr1|57402,Poptr1|701364,Poptr1|570696,Poptr1|57616,Poptr1|56717,Poptr1|555801,Poptr1|353030,Poptr1|106360,Poptr1|592839,Poptr1|575675,Poptr1|580902,Poptr1|553676,Poptr1|561879,Poptr1|102499,Poptr1|48939,Poptr1|562800,Poptr1|592703,Poptr1|569383,Poptr1|570085,Poptr1|58016,Poptr1|569588,Poptr1|571851,Poptr1|557720,Poptr1|578087,Poptr1|566965,Poptr1|55123,Poptr1|97023,Poptr1|576769,Poptr1|550666,Poptr1|570395,Poptr1|53394,Poptr1|653602,Poptr1|347165,Poptr1|99878,Poptr1|562480,Poptr1|550230,Poptr1|570695,Poptr1|344689,Poptr1|347186,Poptr1|560057,Poptr1|71499,Poptr1|557940,Poptr1|549139,Poptr1|552315,Poptr1|560820,Poptr1|561456,Poptr1|556345,Poptr1|581633,Poptr1|65924,Poptr1|577661,Poptr1|343907,Poptr1|562070,Poptr1|548429,Poptr1|56662,Poptr1|574353,Poptr1|549815,Poptr1|674844,Poptr1|106521,Poptr1|579041,Poptr1|559609,Poptr1|102500,Poptr1|593895,Poptr1|646936  
AT1G28690.1 Poptr1|555708  
AT4G38010.1 Poptr1|575764,Poptr1|356294  
AT2G15690.1 Poptr1|645895  
AT2G45350.1 Poptr1|572100  
AT1G06145.1 Poptr1|349130  
AT1G77170.1,AT2G41080.1,AT1G74400.1,AT3G14730.1,AT3G49740.1,AT1G04840.1,AT1G17630.1,AT5G13270.1,AT3G63370.1,AT5G61800.1,AT2G27610.1,AT4G22760.1,AT2G01510.1,AT1G64310.1,AT4G30700.1,AT4G08210.1,AT1G10330.1,AT4G04370.1,AT2G29760.1,AT3G62890.1,AT5G16860.1,AT2G13600.1,AT3G49710.1,AT2G22070.1,AT1G62260.1,AT4G01030.1,AT1G32415.1,AT4G14170.1,AT2G21090.1,AT1G03540.1,AT2G03880.1,AT1G14470.1,AT4G14820.1,AT5G43790.1,AT3G09040.1,AT2G37310.1,AT5G15340.1,AT1G09410.1,AT1G22830.1,AT5G56310.1,AT3G26540.1,AT4G16470.1,AT4G14850.1,AT1G03510.1,AT3G24000.1,AT5G19020.1,AT3G11460.1,AT4G33990.1,AT2G04860.1,AT5G50990.1,AT1G33350.1,AT2G37320.1,AT1G08070.1,AT4G02750.1,AT3G21470.1,AT3G18840.1,AT5G52850.1,AT3G50420.1,AT5G04780.1,AT3G26780.1,AT4G15720.1,AT3G20730.1,AT5G66500.1,AT3G51320.1,AT5G50390.1,AT1G31790.1,AT2G33680.1,AT5G06540.1,AT5G13230.1,AT4G14050.1,AT1G56690.1,AT3G18970.1,AT5G15300.1,AT1G50270.1,AT4G16835.1,AT3G47530.1,AT3G15130.1  
Poptr1|105927,Poptr1|61292,Poptr1|597088,Poptr1|578518,Poptr1|575488,Poptr1|545267,Poptr1|53265,Poptr1|588405,Poptr1|353904,Poptr1|656737,Poptr1|643246,Poptr1|666660,Poptr1|574890,Poptr1|575042,Poptr1|574196,Poptr1|108183,Poptr1|555652,Poptr1|553847,Poptr1|577677,Poptr1|347931,Poptr1|56697,Poptr1|554711,Poptr1|594721,Poptr1|571776,Poptr1|593718,Poptr1|64556,Poptr1|567909,Poptr1|343429,Poptr1|551496,Poptr1|348938,Poptr1|577670,Poptr1|59432,Poptr1|344554,Poptr1|572721,Poptr1|63583,Poptr1|565654,Poptr1|570460,Poptr1|352555,Poptr1|642949,Poptr1|590697,Poptr1|65035,Poptr1|584676,Poptr1|58405,Poptr1|559157,Poptr1|596699,Poptr1|577678,Poptr1|589604,Poptr1|585036,Poptr1|562662,Poptr1|55303,Poptr1|347498,Poptr1|563428,Poptr1|576187,Poptr1|72527,Poptr1|347187,Poptr1|97618,Poptr1|96816,Poptr1|574190,Poptr1|563182,Poptr1|63582,Poptr1|345807,Poptr1|60624,Poptr1|356171,Poptr1|578125,Poptr1|571040,Poptr1|556439,Poptr1|584464,Poptr1|344331,Poptr1|558825,Poptr1|63012,Poptr1|346275,Poptr1|343926,Poptr1|55126,Poptr1|592382,Poptr1|548091,Poptr1|646889,Poptr1|581670,Poptr1|583511,Poptr1|558862,Poptr1|54469,Poptr1|567042,Poptr1|556442,Poptr1|580122,Poptr1|580107,Poptr1|594323,Poptr1|560671,Poptr1|547877,Poptr1|566964,Poptr1|561681  
AT1G34160.1 Poptr1|72661  
AT1G25360.1 Poptr1|643026  
AT2G42920.1 Poptr1|52067  
AT5G46440.1  
AT1G05750.1  
AT5G08510.1,AT3G15930.1,AT4G35130.1,AT4G18840.1,AT5G66520.1  
AT4G31070.1,AT2G02750.1  
AT1G77150.1  
AT3G28640.1  
AT1G77010.1  
AT5G42450.1  
AT1G09220.1  
AT2G35030.1  
AT1G43980.1  
Poptr1|595769,Poptr1|582728  
Poptr1|101719,Poptr1|589132  
Poptr1|102525,Poptr1|101373  
Poptr1|594707  
Poptr1|101377  
Poptr1|577719  
Poptr1|586563  
Poptr1|562069  
Poptr1|348483,Poptr1|570829,Poptr1|564537,Poptr1|347932,Poptr1|106786,Poptr1|347329,Poptr1|565770,Poptr1|102537,Poptr1|556353,Poptr1|59551,Poptr1|354637,Poptr1|99534,Poptr1|582952,Poptr1|548887,Poptr1|591419,Poptr1|97319  
Poptr1|741110,Poptr1|648271  
Poptr1|63237

Poptr1|584587  
Poptr1|63747  
Poptr1|355906  
Poptr1|561533  
Poptr1|557042,Poptr1|554250,Poptr1|576004,Poptr1|61024  
Poptr1|546758,Poptr1|63190  
Poptr1|356159  
Poptr1|61341  
Poptr1|556987,Poptr1|100057  
Poptr1|355082,Poptr1|593145  
Poptr1|564850  
Poptr1|546205  
Poptr1|573430  
AT1G68540.1 Poptr1|698243,Poptr1|345258  
AT5G14700.1 Poptr1|64756  
AT2G45400.1  
Poptr1|695419,Poptr1|552048,Poptr1|552044,Poptr1|552050,Poptr1|593100,Poptr1|347860,Poptr1|58380  
2,Poptr1|552043,Poptr1|709899  
AT2G33590.1,AT2G33600.1 Poptr1|710667,Poptr1|560013  
AT5G58490.1 Poptr1|722576  
AT2G02400.1 Poptr1|689917  
AT5G42800.1 Poptr1|72935,Poptr1|710079  
AT5G19440.1 Poptr1|557864,Poptr1|641271  
AT1G61720.1 Poptr1|694045,Poptr1|687506  
AT4G35420.1 Poptr1|354333  
AT2G23910.1,AT4G30470.1 Poptr1|702210,Poptr1|344512  
AT1G80820.1,AT1G15950.1  
Poptr1|647165,Poptr1|690896,Poptr1|587228,Poptr1|100445,Poptr1|705113,Poptr1|587225  
AT1G25460.1  
AT1G51410.1  
Poptr1|743671,Poptr1|556164  
Poptr1|552046,Poptr1|675667,Poptr1|583803,Poptr1|588839  
Poptr1|346522  
Poptr1|346533  
Poptr1|552049  
Poptr1|683658  
Poptr1|710036  
Poptr1|557814  
Poptr1|682511  
Poptr1|686826  
Poptr1|557813  
Poptr1|587284  
Poptr1|581821  
Poptr1|730243,Poptr1|349902,Poptr1|590025  
Poptr1|596618,Poptr1|547924,Poptr1|587214  
Poptr1|587221  
Poptr1|571084,Poptr1|63022  
Poptr1|676233  
Poptr1|587227  
Poptr1|672094  
AT5G60520.1 Poptr1|558254  
AT5G60530.1  
Poptr1|650456  
Poptr1|650457  
AT2G18910.1 Poptr1|669427,Poptr1|580504  
AT3G09890.1 Poptr1|667869  
AT3G63220.2 Poptr1|559574,Poptr1|342295  
AT3G11490.1 Poptr1|561489,Poptr1|735368,Poptr1|556813  
AT2G46710.1 Poptr1|731430,Poptr1|711250  
AT4G03100.1 Poptr1|572768  
AT2G27440.1,AT5G22400.1,AT1G08340.1  
Poptr1|552642  
Poptr1|585913  
AT3G32940.1 Poptr1|547639,Poptr1|351034  
AT3G05680.1 Poptr1|576494  
AT5G22430.1 Poptr1|697698  
AT2G27385.1  
AT5G63540.1 Poptr1|575395  
AT4G10110.1 Poptr1|581009  
AT3G45300.1 Poptr1|558263  
Poptr1|108613,Poptr1|582812  
Poptr1|582515,Poptr1|104852  
Poptr1|580433  
Poptr1|109013  
Poptr1|586095  
Poptr1|587237  
Poptr1|596234  
Poptr1|579799  
Poptr1|580547  
AT5G57900.1 Poptr1|702232  
AT4G30640.1  
AT5G35400.1 Poptr1|704865

AT5G57340.2 Poptr1|669415,Poptr1|704078  
AT1G06150.1,AT2G31280.3 Poptr1|692890,Poptr1|559676  
AT1G12480.1 Poptr1|548556  
AT5G24030.1,AT4G27970.1 Poptr1|670692  
AT1G62280.1 Poptr1|552770  
Poptr1|661423  
Poptr1|580580  
Poptr1|567056  
Poptr1|568054,Poptr1|584691  
AT3G61590.1 Poptr1|342785,Poptr1|572337  
AT1G27340.1 Poptr1|708738,Poptr1|343795  
AT1G56180.1 Poptr1|567071  
AT5G56550.1 Poptr1|64085  
AT5G66180.1 Poptr1|343459  
AT3G42630.1 Poptr1|584573  
AT1G03100.1 Poptr1|559583  
Poptr1|580151  
AT1G22620.1 Poptr1|592284,Poptr1|702545  
AT3G14205.1 Poptr1|704803,Poptr1|693657,Poptr1|736728  
AT1G17340.1  
AT3G43220.1,AT5G20840.1  
Poptr1|663443  
Poptr1|102743  
AT3G47070.1 Poptr1|650159,Poptr1|641088  
AT3G12170.1,AT5G06910.1 Poptr1|734961,Poptr1|583602  
AT1G11380.1 Poptr1|713605,Poptr1|727749  
AT1G72310.1,AT1G53820.1 Poptr1|684994,Poptr1|356430  
AT3G47990.1 Poptr1|733294  
AT3G13670.1 Poptr1|547648,Poptr1|684710  
AT2G25760.2 Poptr1|736966,Poptr1|561734  
Poptr1|705795  
Poptr1|349613  
AT5G54660.1 Poptr1|571467,Poptr1|569061  
AT1G47420.1 Poptr1|677822  
AT3G01440.1 Poptr1|699989  
Poptr1|569063  
AT1G21480.1 Poptr1|684533,Poptr1|559331  
AT1G71970.1,AT1G22680.1 Poptr1|665754,Poptr1|48043  
AT1G49910.1,AT3G19590.1 Poptr1|54545,Poptr1|684006  
AT1G80670.1 Poptr1|708612  
AT1G69400.1 Poptr1|564263,Poptr1|566973  
AT1G15850.1  
Poptr1|693217  
Poptr1|584636  
AT2G43370.1 Poptr1|59765  
AT2G36480.1 Poptr1|589570  
AT2G36485.1  
AT5G21040.1 Poptr1|556865  
AT4G35980.1 Poptr1|689695  
AT1G45201.1 Poptr1|703127,Poptr1|703126,Poptr1|72005,Poptr1|591966  
AT3G14360.1 Poptr1|346159,Poptr1|349701  
AT5G67050.1 Poptr1|696027  
AT5G42930.1  
AT1G56630.1  
AT3G11810.1,AT2G03330.1 Poptr1|564257  
AT5G01160.1 Poptr1|560867  
AT2G01650.1 Poptr1|720213  
AT1G27070.1 Poptr1|354854,Poptr1|355048  
AT5G03420.1 Poptr1|589483  
Poptr1|667876  
AT3G51250.1,AT2G17840.1,AT4G35985.1 Poptr1|697192,Poptr1|556629  
Poptr1|741222  
AT5G48720.1 Poptr1|553183,Poptr1|573330  
AT4G10090.1 Poptr1|696910  
AT1G11655.1 Poptr1|555336  
AT4G04745.1  
AT5G09820.2 Poptr1|65148  
AT3G11890.2 Poptr1|653432  
AT3G01980.1 Poptr1|683958  
Poptr1|583551  
AT5G49540.1 Poptr1|698333,Poptr1|686370  
AT1G53645.1 Poptr1|575757  
AT5G16180.1 Poptr1|97120  
AT3G23070.1,AT4G14510.1 Poptr1|698028  
AT3G25440.1 Poptr1|573197  
AT4G29750.1,AT3G18390.1 Poptr1|64739,Poptr1|699500,Poptr1|352061  
AT3G01370.1  
Poptr1|106849  
Poptr1|553129  
AT5G54840.1 Poptr1|569105  
AT3G21700.3  
AT4G23840.1 Poptr1|63429

AT3G56460.1 Poptr1|704206  
 AT1G04860.1 Poptr1|577426,Poptr1|65088  
 AT2G32780.1  
 AT1G23180.1 Poptr1|354270  
 AT3G47120.1 Poptr1|723082  
 AT5G02580.1 Poptr1|561508  
 AT3G10250.1,AT5G04090.2 Poptr1|701326,Poptr1|685823  
 AT2G46420.1 Poptr1|731327,Poptr1|692361  
 AT3G61700.1  
 Poptr1|355230,Poptr1|700806  
 Poptr1|569503  
 AT1G77250.1 Poptr1|559297  
 Poptr1|347198  
 AT1G04390.1 Poptr1|642586  
 AT1G26460.1 Poptr1|566937  
 AT1G05440.1 Poptr1|564856,Poptr1|566230  
 AT4G02170.1,AT5G38700.1 Poptr1|664381,Poptr1|552501  
 AT3G61320.1,AT2G45870.1 Poptr1|572242  
 Poptr1|580989  
 AT3G59550.1 Poptr1|63820  
 AT4G05360.1  
 AT5G05490.1 Poptr1|353715  
 AT2G04740.1 Poptr1|573063  
 AT1G11120.1,AT1G61170.1 Poptr1|694020,Poptr1|568271  
 AT3G52030.1 Poptr1|557824  
 AT1G73470.1 Poptr1|580644  
 AT1G65690.1,AT5G36970.1 Poptr1|575862,Poptr1|570412  
 AT1G54540.1 Poptr1|61169,Poptr1|546394  
 AT2G35980.1 Poptr1|576519  
 Poptr1|571757  
 Poptr1|580377  
 AT1G31240.1 Poptr1|586747,Poptr1|587952,Poptr1|575578  
 AT4G36650.1 Poptr1|76276  
 Poptr1|593954  
 AT2G47430.1 Poptr1|572623,Poptr1|565207,Poptr1|597214  
 AT1G76150.1 Poptr1|652170  
 AT4G27360.1 Poptr1|97894,Poptr1|555491,Poptr1|584663,Poptr1|699119  
 AT1G52250.1 Poptr1|645953  
 AT5G20110.1 Poptr1|575070  
 AT1G23220.1 Poptr1|687146,Poptr1|696510  
 AT3G16120.1  
 Poptr1|576854,Poptr1|356795  
 Poptr1|350042  
 Poptr1|660964,Poptr1|579479,Poptr1|680567  
 AT2G43410.1 Poptr1|562213  
 AT2G01440.1 Poptr1|726887  
 AT3G13800.1 Poptr1|592775  
 AT2G42110.1 Poptr1|653491,Poptr1|701346  
 AT3G48900.1 Poptr1|57810  
 AT3G48910.1  
 AT5G42560.1 Poptr1|692966  
 AT2G36020.1 Poptr1|576530,Poptr1|561433  
 AT1G19950.1  
 Poptr1|559820  
 Poptr1|546171  
 AT1G14270.1 Poptr1|354418  
 AT1G48580.1 Poptr1|355487  
 AT1G78210.1 Poptr1|694310,Poptr1|551581  
 AT5G09430.1 Poptr1|65109  
 AT4G33180.1 Poptr1|653796  
 AT1G17430.1,AT1G72620.1 Poptr1|63661  
 AT4G39955.1  
 AT5G21950.1  
 Poptr1|577405  
 AT2G03070.1 Poptr1|55651  
 Poptr1|679475  
 AT4G17350.1,AT5G47440.1 Poptr1|343413,Poptr1|702830  
 AT4G14740.1,AT3G22810.1 Poptr1|686240,Poptr1|687090  
 AT3G63300.1 Poptr1|342285,Poptr1|52104  
 AT5G57770.1 Poptr1|578668  
 AT4G32780.1 Poptr1|668906  
 AT4G16670.1  
 AT5G43870.1  
 AT4G32785.1  
 AT5G45320.1 Poptr1|60089,Poptr1|349392  
 AT2G34460.1 Poptr1|727847  
 AT2G37750.1 Poptr1|560811,Poptr1|576835  
 AT5G02090.1  
 AT4G33800.1 Poptr1|557531,Poptr1|65303  
 AT1G51920.1 Poptr1|645871,Poptr1|553650  
 AT1G51915.1  
 AT1G08680.1 Poptr1|730096

AT2G16920.1 Poptr1|546247  
AT2G33770.1 Poptr1|97168,Poptr1|555800  
AT1G53020.1,AT3G15355.1 Poptr1|582716,Poptr1|670076,Poptr1|660931  
Poptr1|581735  
Poptr1|566845,Poptr1|354016  
AT4G34265.1,AT2G15000.2 Poptr1|642049,Poptr1|649643  
AT4G21740.1 Poptr1|568598,Poptr1|642348  
AT1G30515.1  
AT3G45020.1 Poptr1|673380  
Poptr1|650513  
AT1G20693.1 Poptr1|652229,Poptr1|642802  
AT5G23420.1 Poptr1|655598  
AT3G51880.2 Poptr1|656232,Poptr1|567282  
AT2G34450.2 Poptr1|556249  
AT1G20696.2  
AT5G23405.1  
Poptr1|716168  
AT5G18830.1 Poptr1|354883,Poptr1|565705  
AT4G34190.1 Poptr1|697348,Poptr1|691741  
AT1G34360.1 Poptr1|557058  
AT4G02280.1 Poptr1|692288  
AT5G20830.1,AT3G43190.1 Poptr1|589341,Poptr1|736740  
AT5G37180.1 Poptr1|743479,Poptr1|569421,Poptr1|556032,Poptr1|592812  
AT5G49190.1  
AT1G73370.1  
Poptr1|104465  
Poptr1|565553  
AT4G13670.1 Poptr1|547961  
AT4G35870.1 Poptr1|593795,Poptr1|562907  
AT5G17290.1 Poptr1|592819  
AT2G25920.1 Poptr1|711366,Poptr1|664376  
AT3G04310.1 Poptr1|573761  
AT5G44120.3,AT1G03880.1,AT4G28520.1  
Poptr1|670351,Poptr1|580010,Poptr1|559699,Poptr1|743113,Poptr1|705552,Poptr1|692900  
AT1G03890.1  
Poptr1|559696  
Poptr1|641975  
AT5G24314.1 Poptr1|666108  
AT3G06880.1 Poptr1|596141  
Poptr1|578493  
AT3G15150.1 Poptr1|727174  
AT1G12330.1 Poptr1|97324,Poptr1|693484  
AT1G16070.2 Poptr1|62792  
Poptr1|554914  
AT5G11760.1 Poptr1|653930,Poptr1|577927  
AT5G18250.1,AT3G04040.1 Poptr1|62938  
AT2G41945.1 Poptr1|653464  
AT4G37040.1 Poptr1|51845  
AT1G13270.1 Poptr1|720678  
AT2G45240.1 Poptr1|730835  
AT3G25740.1  
Poptr1|588331  
AT4G20060.1 Poptr1|578864  
AT3G60300.1 Poptr1|551959  
Poptr1|591771  
AT1G31335.1 Poptr1|341661  
Poptr1|63337  
AT3G02500.1,AT5G16030.2 Poptr1|670881,Poptr1|648290  
AT1G73440.1 Poptr1|591662  
AT3G08900.1 Poptr1|564316,Poptr1|698361  
AT5G16510.1 Poptr1|675590  
AT5G15650.1,AT3G02230.1 Poptr1|673066,Poptr1|556393  
Poptr1|678781,Poptr1|581398  
Poptr1|574037  
Poptr1|565377  
Poptr1|575386,Poptr1|570293  
AT1G52270.1,AT4G28310.1 Poptr1|582717  
AT3G13780.1 Poptr1|597692  
AT1G32800.1 Poptr1|550449  
AT4G10600.1  
AT1G18660.4 Poptr1|569963  
AT3G01210.1 Poptr1|736292,Poptr1|736290  
AT5G32450.1 Poptr1|573950,Poptr1|571178  
AT5G46870.1,AT4G17720.1 Poptr1|702941,Poptr1|646278  
AT1G14340.1  
AT5G16840.1  
AT1G67950.3  
Poptr1|548130  
Poptr1|658693  
AT1G63855.3 Poptr1|679091  
AT5G01470.1 Poptr1|560908  
AT3G43540.1 Poptr1|717839

AT1G27590.1,AT1G27570.1 Poptr1|551676  
AT4G00620.1 Poptr1|692405  
AT2G38660.1 Poptr1|589586  
AT4G00600.1  
AT3G12290.1  
Poptr1|572220  
Poptr1|577253  
AT5G28830.1 Poptr1|680280,Poptr1|571034  
AT1G31817.1 Poptr1|718507  
AT4G30840.1 Poptr1|561365  
AT3G04400.1,AT2G33370.1,AT1G04480.1 Poptr1|711541,Poptr1|682550,Poptr1|591181,Poptr1|345467  
Poptr1|546168,Poptr1|591599,Poptr1|554454,Poptr1|567033  
Poptr1|595226  
Poptr1|594144  
Poptr1|568969  
AT2G33260.1 Poptr1|573890  
AT3G57910.1 Poptr1|667389  
AT1G05090.1,AT4G20720.1 Poptr1|692189  
AT3G29130.1 Poptr1|675402  
AT1G54990.1 Poptr1|729591  
AT3G12490.2 Poptr1|62858,Poptr1|679045,Poptr1|711771  
AT5G12140.1  
Poptr1|548704,Poptr1|558164  
Poptr1|681596  
Poptr1|690699,Poptr1|667246  
Poptr1|593389  
AT4G16790.1 Poptr1|356498,Poptr1|349765  
AT5G50010.1 Poptr1|72233,Poptr1|551633  
AT3G22435.1 Poptr1|345406,Poptr1|566242  
AT3G56810.1 Poptr1|351318,Poptr1|576060  
AT1G31460.1 Poptr1|590140  
AT1G23270.1  
AT5G11520.1 Poptr1|654019  
AT5G19550.1 Poptr1|689103  
AT2G30970.1 Poptr1|57261  
AT4G31990.3 Poptr1|654206,Poptr1|689059  
AT1G62800.2  
Poptr1|352803  
Poptr1|589392,Poptr1|351974  
Poptr1|577144  
Poptr1|577145  
AT3G13225.1 Poptr1|642344  
AT3G47860.1 Poptr1|730366  
AT4G24200.1 Poptr1|550864,Poptr1|559850  
AT5G64690.1 Poptr1|65152,Poptr1|585941,Poptr1|597337  
AT4G34960.1 Poptr1|557096,Poptr1|713277  
AT3G62030.1 Poptr1|710084  
AT4G33060.1 Poptr1|668739  
AT3G22920.1,AT2G29960.1,AT4G32420.1,AT2G16600.1,AT2G15790.1,AT2G21130.1,AT3G63400.1,AT5G13120.1,AT3G56070.1,AT2G36130.1,AT2G38730.1,AT4G38740.1,AT3G44600.1,AT3G55920.1,AT5G58710.1,AT1G01940.1,AT4G34870.1  
Poptr1|665264,Poptr1|344719,Poptr1|51837,Poptr1|643242,Poptr1|730901,Poptr1|651824,Poptr1|588781,Poptr1|54489,Poptr1|738193,Poptr1|723045,Poptr1|554741,Poptr1|552068,Poptr1|555070,Poptr1|744234,Poptr1|51890,Poptr1|76144,Poptr1|643241,Poptr1|556595,Poptr1|652085,Poptr1|665273,Poptr1|737158,Poptr1|550879,Poptr1|697207,Poptr1|721509,Poptr1|687317,Poptr1|735314,Poptr1|46322,Poptr1|640072  
AT5G67530.1  
Poptr1|352647  
Poptr1|107483,Poptr1|670501  
Poptr1|679335  
Poptr1|671129  
AT2G28600.1 Poptr1|567732  
AT4G33160.1 Poptr1|352569  
AT1G28250.1 Poptr1|647960  
AT2G21195.2 Poptr1|665667  
AT3G12040.1 Poptr1|688729  
AT3G13620.1 Poptr1|639662  
AT3G19553.1 Poptr1|697379,Poptr1|642081,Poptr1|705481  
AT1G31820.1,AT1G31830.1 Poptr1|556671,Poptr1|646369  
AT5G05630.1  
Poptr1|48442  
Poptr1|557048  
AT4G16410.1 Poptr1|652434  
AT1G64770.1 Poptr1|702428  
Poptr1|571212  
AT3G49160.1 Poptr1|569507  
AT1G34770.1 Poptr1|72324  
AT1G04985.1 Poptr1|682930  
AT5G54930.1 Poptr1|569131,Poptr1|571556  
AT1G30070.1 Poptr1|675455  
AT1G06320.1 Poptr1|559478  
AT3G48480.1 Poptr1|575302,Poptr1|698456  
AT5G19340.1,AT3G05980.1 Poptr1|564814,Poptr1|566275

ATMG00080.1 Poptr1|583833  
AT3G16560.1 Poptr1|704818,Poptr1|54946  
AT2G46920.1 Poptr1|688220,Poptr1|692319  
AT2G28890.1,AT1G07630.1 Poptr1|723282,Poptr1|64395  
AT2G35350.1 Poptr1|589986  
AT3G09400.1,AT5G02400.1  
Poptr1|684814  
Poptr1|351762  
AT4G28180.1 Poptr1|71751,Poptr1|75868  
AT5G01910.1 Poptr1|577197,Poptr1|351999  
AT1G03687.1 Poptr1|582704  
AT5G13890.1 Poptr1|553107  
Poptr1|593297  
AT4G28395.1 Poptr1|562155,Poptr1|594653,Poptr1|654385  
AT2G29640.1 Poptr1|64289  
AT1G47820.1,AT1G47813.1 Poptr1|664358  
AT3G08800.1 Poptr1|577084  
AT5G04420.1 Poptr1|698694  
Poptr1|563656,Poptr1|563658  
AT1G28540.1 Poptr1|555732  
AT5G42330.1 Poptr1|693024,Poptr1|652202  
AT5G20045.1 Poptr1|595993,Poptr1|563533,Poptr1|581137  
AT5G27860.1 Poptr1|671710  
Poptr1|671711  
AT1G15230.1 Poptr1|553722  
AT4G25280.1 Poptr1|733991  
AT5G26667.1 Poptr1|591816,Poptr1|644205  
AT3G60180.1  
Poptr1|570587  
Poptr1|57118  
AT4G20310.1 Poptr1|350494  
Poptr1|63258  
AT3G52430.1 Poptr1|562519,Poptr1|558462  
AT1G12850.1 Poptr1|343121,Poptr1|732114  
AT5G04885.1 Poptr1|344839  
AT5G20950.1 Poptr1|686608  
AT5G20940.1  
Poptr1|702444,Poptr1|687990  
Poptr1|595370  
Poptr1|571182  
AT1G76920.1 Poptr1|559358,Poptr1|551335  
AT1G18730.1 Poptr1|728528  
AT1G21010.1,AT1G76600.1 Poptr1|73228,Poptr1|550706  
AT1G18290.1 Poptr1|355471,Poptr1|575025  
AT5G17070.1 Poptr1|574045  
AT2G17770.1,AT4G35900.1 Poptr1|593807,Poptr1|694871  
AT1G62750.1 Poptr1|711780  
AT2G45030.1,AT1G45332.1 Poptr1|744106  
Poptr1|590610  
Poptr1|108693,Poptr1|107985  
Poptr1|554187  
AT1G67180.1 Poptr1|545672  
AT1G77230.1 Poptr1|551394  
ATCG00560.1 Poptr1|553108,Poptr1|593299  
Poptr1|678855  
AT4G24110.1 Poptr1|548245,Poptr1|350423  
AT2G33180.1 Poptr1|640000  
AT2G32300.1 Poptr1|562324  
AT5G20230.1 Poptr1|703049,Poptr1|578934,Poptr1|652799,Poptr1|64107,Poptr1|578935,Poptr1|669766  
AT3G20570.1 Poptr1|571501,Poptr1|569096  
AT1G64640.1 Poptr1|709061  
AT2G27035.1 Poptr1|549016  
AT4G31840.1,AT2G25060.1 Poptr1|695215,Poptr1|669166,Poptr1|561995  
AT4G12880.1,AT5G15350.1,AT3G01070.1 Poptr1|556316,Poptr1|577695  
AT1G79800.1 Poptr1|349604,Poptr1|64054  
AT4G28365.1,AT4G32490.1 Poptr1|594662  
AT1G22480.1,AT1G72230.1 Poptr1|341494,Poptr1|692634  
AT1G17800.1 Poptr1|562481  
AT3G27200.1 Poptr1|641792  
AT5G07475.1 Poptr1|597406,Poptr1|548229,Poptr1|104214  
AT5G26330.1 Poptr1|696431,Poptr1|726591  
AT2G02850.1 Poptr1|709727  
AT2G44790.1,AT3G60280.1,AT3G60270.1  
AT5G57920.1  
AT5G25090.1  
AT2G23990.2,AT4G30590.1  
AT2G26720.1  
Poptr1|570923,Poptr1|579624,Poptr1|350135,Poptr1|573952  
Poptr1|560138  
Poptr1|577694  
Poptr1|554892,Poptr1|705108  
Poptr1|546199,Poptr1|561943,Poptr1|549335,Poptr1|552190,Poptr1|561944,Poptr1|553787,Poptr1|55213



6,Poptr1|582282,Poptr1|552138,Poptr1|552143,Poptr1|551171  
Poptr1|576304  
Poptr1|342383  
Poptr1|553152  
AT2G42560.1 Poptr1|574347  
AT5G65520.1 Poptr1|551716  
AT1G49000.1,AT3G18560.1 Poptr1|687756  
Poptr1|566681  
AT2G46200.1 Poptr1|572321  
AT1G80290.1 Poptr1|583189  
AT1G34470.1,AT4G09640.1,AT1G71900.1 Poptr1|574289,Poptr1|592226  
AT2G21120.1,AT4G38730.1 Poptr1|713225  
AT4G13800.1,AT3G23870.1  
Poptr1|723020,Poptr1|705990  
Poptr1|703975  
Poptr1|641989  
AT3G12100.1 Poptr1|667366  
AT1G77290.1 Poptr1|685303  
AT2G40090.1 Poptr1|564017  
Poptr1|567277  
AT3G15395.1 Poptr1|352648,Poptr1|579485  
AT1G79120.1 Poptr1|586873  
Poptr1|569174  
AT3G14110.1 Poptr1|98993  
AT2G42870.1,AT3G58850.1 Poptr1|651666,Poptr1|643394  
AT2G47360.1 Poptr1|552535,Poptr1|572607  
AT1G02570.1  
AT1G30490.1,AT2G34710.1 Poptr1|707748,Poptr1|705160  
AT4G32880.1 Poptr1|58503,Poptr1|685007,Poptr1|685537,Poptr1|48902  
AT1G52150.2  
Poptr1|594266  
AT4G11790.1 Poptr1|63611,Poptr1|350161  
AT1G09700.1 Poptr1|558990  
AT3G19810.1 Poptr1|659320  
AT3G17350.1 Poptr1|682606,Poptr1|564336  
AT5G17790.1 Poptr1|579355  
Poptr1|571288  
AT5G66350.1 Poptr1|655389,Poptr1|550944,Poptr1|593887  
AT5G12330.1 Poptr1|557685,Poptr1|64636  
AT1G19790.1,AT1G75520.1  
AT5G33210.1,AT3G51060.1  
AT4G36260.1,AT2G18120.1  
Poptr1|556520  
Poptr1|350877  
AT3G18300.1,AT1G48780.1 Poptr1|574912,Poptr1|569809  
AT1G19980.1 Poptr1|550885,Poptr1|715475  
AT1G49870.1 Poptr1|649661  
AT4G00950.1 Poptr1|552289,Poptr1|700298  
AT5G44150.1 Poptr1|594619  
AT4G36860.2 Poptr1|747299,Poptr1|347711,Poptr1|357026,Poptr1|719410  
AT5G66620.1,AT5G66630.1,AT5G66640.1,AT5G17890.1,AT5G66610.1  
AT1G24450.1 Poptr1|575135,Poptr1|699429  
AT4G08280.1 Poptr1|581167,Poptr1|347269  
AT2G21050.1 Poptr1|694223,Poptr1|649249  
AT1G77690.1 Poptr1|694546,Poptr1|643656  
AT2G38120.1 Poptr1|685718,Poptr1|576946  
AT5G01240.1  
Poptr1|720153,Poptr1|659543  
AT4G14120.1,AT3G23740.1 Poptr1|692105  
AT1G13030.1 Poptr1|696324  
AT4G25330.1 Poptr1|644992  
AT1G06510.1 Poptr1|651678  
AT1G79850.1 Poptr1|705735  
AT1G26180.1 Poptr1|564433  
AT3G52250.1 Poptr1|655933,Poptr1|659846  
AT1G27440.1 Poptr1|554680,Poptr1|708857  
AT2G28110.1 Poptr1|54841  
AT5G61840.1 Poptr1|687841,Poptr1|570368  
AT5G22940.1  
Poptr1|586661  
Poptr1|666775  
Poptr1|666776,Poptr1|575558  
Poptr1|597125  
AT3G07480.1 Poptr1|682939  
AT4G09680.1 Poptr1|551882  
AT3G20070.1 Poptr1|697565  
AT5G42765.1 Poptr1|700726  
AT4G15420.1 Poptr1|700573  
AT5G37010.1 Poptr1|699325,Poptr1|575860  
AT1G65710.1  
AT2G20210.1 Poptr1|700718  
AT5G36740.1,AT5G36670.1 Poptr1|346970,Poptr1|559568

AT5G58610.1,AT3G14980.1 Poptr1|557671,Poptr1|589901  
AT4G14920.1 Poptr1|658524  
AT1G05380.1  
Poptr1|551783,Poptr1|98366,Poptr1|704618  
Poptr1|657157  
AT2G39000.1 Poptr1|724989,Poptr1|696954  
AT5G10460.1 Poptr1|580406  
AT2G21490.1 Poptr1|557213,Poptr1|713051  
AT4G39130.1  
AT4G22360.1 Poptr1|351183,Poptr1|575945  
AT5G08120.1 Poptr1|714433  
AT2G46000.1 Poptr1|700229  
AT3G19510.1 Poptr1|697367,Poptr1|65247  
AT4G38980.1 Poptr1|556536,Poptr1|557176  
AT1G49170.1 Poptr1|595392  
AT3G17670.1 Poptr1|580609  
AT3G55420.1 Poptr1|656097,Poptr1|724701  
AT4G03080.1 Poptr1|572775,Poptr1|552636  
AT2G27210.1,AT1G08420.1 Poptr1|705890  
AT1G03445.1  
Poptr1|674386  
Poptr1|565602,Poptr1|650403  
Poptr1|565601  
Poptr1|650401  
AT2G22530.1 Poptr1|76448  
AT5G04190.1 Poptr1|75922,Poptr1|558667  
AT4G08240.1 Poptr1|692710  
AT1G71790.1 Poptr1|714835  
AT3G57860.1,AT2G42260.1 Poptr1|672924,Poptr1|576299  
AT1G21380.1,AT1G76970.1 Poptr1|559305,Poptr1|551388  
AT4G32760.1 Poptr1|701964,Poptr1|344676  
AT3G08790.1  
Poptr1|642114  
AT5G04000.1 Poptr1|652681,Poptr1|576241  
AT3G11960.1 Poptr1|561208  
AT4G19140.1 Poptr1|554122,Poptr1|739843  
AT1G51745.1 Poptr1|349380  
Poptr1|64124  
AT1G64850.1 Poptr1|571346  
AT4G10810.1 Poptr1|640301,Poptr1|712591  
Poptr1|552299  
AT3G18800.1 Poptr1|746510,Poptr1|46375  
AT1G63000.1 Poptr1|548533,Poptr1|554291  
AT1G78570.1 Poptr1|584885  
AT3G14790.1,AT1G53500.1  
Poptr1|583125  
AT2G46915.1 Poptr1|692327  
AT4G02725.1 Poptr1|714983  
AT2G31980.1 Poptr1|572922,Poptr1|645343  
AT3G10130.1 Poptr1|735569  
AT2G39530.1 Poptr1|588729  
Poptr1|569395  
AT3G09280.1 Poptr1|351833  
Poptr1|574523  
AT2G19640.2 Poptr1|48616  
AT5G02502.1 Poptr1|567443,Poptr1|563880,Poptr1|656073  
AT1G11910.1,AT1G62290.1 Poptr1|642209  
Poptr1|572979,Poptr1|692186  
Poptr1|60554,Poptr1|568056,Poptr1|673589,Poptr1|570655  
Poptr1|572978  
Poptr1|54878  
AT2G38695.1 Poptr1|350935  
AT2G23240.1,AT2G42000.1 Poptr1|556771,Poptr1|595009  
AT1G22630.1 Poptr1|592283  
AT1G56220.3 Poptr1|671703,Poptr1|570775  
AT1G30880.1 Poptr1|554615  
AT5G60640.1 Poptr1|686924  
AT3G54960.1  
AT3G16110.1,AT1G52260.1  
AT3G12350.1 Poptr1|347578  
AT5G38380.2 Poptr1|580803  
AT1G58120.1 Poptr1|347458  
Poptr1|562395  
AT2G38800.1 Poptr1|560433,Poptr1|576215  
AT5G04020.1  
AT3G24560.2 Poptr1|578472  
AT4G39630.1 Poptr1|71705,Poptr1|562665  
AT4G30010.1 Poptr1|652865,Poptr1|579034  
AT1G48300.1 Poptr1|657781  
Poptr1|552614  
AT3G49390.1 Poptr1|732764,Poptr1|345756  
AT1G53650.1,AT3G14450.1 Poptr1|707802,Poptr1|660689

AT1G32790.2  
 AT4G10610.1  
 AT5G24440.1  
     Poptr1|678031  
 AT5G02710.1      Poptr1|561527  
 AT3G63430.1      Poptr1|551114  
 AT3G55480.1      Poptr1|724688  
 AT5G63150.1      Poptr1|355979  
     Poptr1|64860  
 AT2G37195.1      Poptr1|702736,Poptr1|576692  
 AT5G16850.1      Poptr1|349287  
 AT1G22770.1      Poptr1|685335,Poptr1|551288  
 AT1G33330.1      Poptr1|581061  
 AT1G55730.1,AT3G13320.1,AT1G55720.1      Poptr1|582550,Poptr1|708170  
 AT3G51860.1,AT2G38170.3      Poptr1|668025,Poptr1|653119  
     Poptr1|48970  
 AT3G48550.1      Poptr1|662156,Poptr1|575361  
 AT2G38440.1      Poptr1|577102,Poptr1|653178  
 AT5G01730.1  
 AT1G23830.1,AT1G23850.1,AT1G23840.1      Poptr1|561978  
 AT1G08390.1      Poptr1|553290,Poptr1|594853  
 AT1G79915.1      Poptr1|63982  
 AT3G53850.1      Poptr1|560815  
 AT2G37200.1      Poptr1|59911,Poptr1|576693,Poptr1|54812  
 AT1G49405.1      Poptr1|649477,Poptr1|712897  
 AT4G37235.1      Poptr1|696069  
 AT3G23200.1      Poptr1|55077  
 AT5G02060.1  
 AT2G28370.1  
 AT3G50810.1  
     Poptr1|682638  
     Poptr1|589436,Poptr1|589435  
 AT3G27110.1      Poptr1|691641  
 AT4G35540.1      Poptr1|545495  
 AT4G11950.1,AT4G22900.1      Poptr1|48774,Poptr1|554286  
 AT1G09290.1      Poptr1|698135  
 AT3G51010.1      Poptr1|696131  
 AT2G37960.1,AT3G54060.1      Poptr1|576900,Poptr1|351856  
 AT2G01290.1      Poptr1|566525,Poptr1|686311,Poptr1|640727  
 AT3G04790.1      Poptr1|595438,Poptr1|571023  
 AT1G71100.1  
     Poptr1|560391  
     Poptr1|106551  
 AT1G07795.1,AT2G28725.1      Poptr1|560748  
 AT3G25430.1      Poptr1|572061,Poptr1|689601  
 AT1G55870.1      Poptr1|65502  
 AT3G23100.1      Poptr1|687073  
 AT1G61410.1  
 AT5G17560.1      Poptr1|571371  
 AT5G64680.1      Poptr1|708869  
 AT3G14270.1      Poptr1|704808  
 AT1G71010.1      Poptr1|726898,Poptr1|345299  
 AT1G34260.1      Poptr1|702568  
 AT4G33240.1  
     Poptr1|646052  
     Poptr1|646054  
     Poptr1|740631  
 AT5G50350.1      Poptr1|575308,Poptr1|570216  
 AT2G14910.1      Poptr1|642054  
 AT4G34140.1      Poptr1|348330  
 AT3G59430.1      Poptr1|562237,Poptr1|594516  
 AT3G56950.1      Poptr1|652505,Poptr1|734665  
 AT2G38550.1      Poptr1|717141,Poptr1|734333  
 AT4G38490.1      Poptr1|648826  
 AT2G17570.1      Poptr1|71888  
 AT5G58770.1      Poptr1|65114,Poptr1|641074,Poptr1|54700  
 AT5G60510.1,AT5G60500.1  
 AT5G58784.1,AT2G23410.1,AT5G58782.1,AT5G58780.1  
 AT2G23400.1  
     Poptr1|346855,Poptr1|579560  
     Poptr1|105985  
     Poptr1|109192  
 AT2G31425.1,AT2G31430.1,AT3G55680.1      Poptr1|348386  
 AT5G38530.1      Poptr1|704136  
 AT3G29370.1,AT5G39240.1      Poptr1|648545,Poptr1|577741  
 AT2G46060.1      Poptr1|572286  
 AT1G10522.1      Poptr1|658612  
     Poptr1|566325  
 AT1G53200.1      Poptr1|346042  
 AT2G02880.1      Poptr1|732747  
     Poptr1|569611  
 AT5G38630.1      Poptr1|704145

AT1G26100.1 Poptr1|696591  
 AT4G25570.1 Poptr1|701190,Poptr1|662338  
 AT1G14730.1 Poptr1|354331,Poptr1|726759  
 Poptr1|566404,Poptr1|714388,Poptr1|696590  
 Poptr1|566685  
 Poptr1|581121  
 Poptr1|354330  
 AT5G57655.2 Poptr1|702191  
 AT4G18975.1 Poptr1|727885  
 AT5G22820.1 Poptr1|721442  
 AT1G70760.1 Poptr1|658753  
 AT5G11780.1 Poptr1|561678  
 AT4G28088.1 Poptr1|695210,Poptr1|669569  
 AT3G05890.1,AT3G05880.1 Poptr1|671489,Poptr1|690193  
 AT2G38905.1 Poptr1|563785  
 AT4G30650.1,AT4G30660.1  
 AT2G24040.1  
 Poptr1|570651  
 Poptr1|567552  
 AT1G29290.1 Poptr1|568673,Poptr1|693985  
 AT1G16950.1  
 AT3G05330.1 Poptr1|595599,Poptr1|570843  
 AT4G16700.1 Poptr1|343414  
 AT5G64010.1 Poptr1|694284  
 Poptr1|562483  
 AT1G06010.1 Poptr1|575752,Poptr1|662396  
 AT2G28105.1 Poptr1|584442  
 AT3G07210.1 Poptr1|553198  
 AT3G62270.1,AT2G47160.1 Poptr1|552579  
 AT1G15460.1,AT1G74810.1 Poptr1|349502,Poptr1|63713,Poptr1|58541  
 AT5G25430.1  
 AT4G32510.1  
 Poptr1|345172  
 Poptr1|733337,Poptr1|345944  
 Poptr1|344712  
 Poptr1|352121  
 AT2G05755.1 Poptr1|573006  
 AT5G07400.1 Poptr1|570394  
 Poptr1|575497  
 AT2G37920.1 Poptr1|576859,Poptr1|653038  
 AT4G28025.1 Poptr1|352426  
 AT5G12235.1 Poptr1|576153,Poptr1|557704  
 AT3G52480.1 Poptr1|352443,Poptr1|576520  
 AT3G11640.1  
 AT4G34630.1 Poptr1|556522,Poptr1|697245  
 AT5G48420.1  
 AT4G15080.1,AT3G22180.1 Poptr1|575992,Poptr1|344026  
 AT2G33640.1 Poptr1|73184,Poptr1|342103  
 AT4G27390.1 Poptr1|744679  
 AT1G77550.1 Poptr1|59108  
 AT5G38060.1 Poptr1|645295  
 Poptr1|593921  
 AT4G14110.1 Poptr1|705673  
 Poptr1|553463  
 AT4G13540.1,AT3G23930.1 Poptr1|696346,Poptr1|658105  
 AT5G66810.1 Poptr1|51844  
 AT5G54180.1,AT4G14605.1,AT4G38160.2,AT4G02990.1 Poptr1|585236,Poptr1|556744,Poptr1|678072  
 AT2G44020.1  
 AT1G30135.1,AT2G34600.1 Poptr1|568407,Poptr1|560260  
 AT5G14760.1 Poptr1|549513  
 AT5G66005.3 Poptr1|748589  
 Poptr1|558783  
 AT4G00590.1 Poptr1|731038  
 AT5G61540.1 Poptr1|730562  
 AT5G17380.1 Poptr1|685092  
 AT3G22780.1,AT3G22760.1,AT4G14770.1 Poptr1|696409  
 AT3G04850.1  
 Poptr1|63706  
 Poptr1|595447,Poptr1|571010  
 Poptr1|578182,Poptr1|352899  
 Poptr1|726506  
 Poptr1|553658  
 Poptr1|578181  
 Poptr1|571009  
 AT2G07722.1,ATMG00620.1,ATMG00170.1 Poptr1|679412  
 AT5G14220.1 Poptr1|64925  
 AT5G09850.1 Poptr1|743104,Poptr1|683988  
 AT5G49555.1 Poptr1|686087  
 AT5G49550.1 Poptr1|580718  
 AT1G04010.1 Poptr1|573403  
 AT3G13682.1 Poptr1|568963  
 AT1G62830.1 Poptr1|550801

AT4G29720.1 Poptr1|561090  
 AT3G10390.1 Poptr1|567658,Poptr1|353344  
 AT4G16310.1 Poptr1|346731,Poptr1|73001  
 Poptr1|579699,Poptr1|73126  
 Poptr1|63440  
 AT4G23330.1 Poptr1|646623,Poptr1|691130  
 AT1G02700.1 Poptr1|572650  
 AT1G64960.1 Poptr1|553972  
 AT1G02020.1 Poptr1|347842  
 AT1G51405.1 Poptr1|64467  
 Poptr1|107727  
 AT5G19190.1,AT3G06070.1 Poptr1|696250  
 AT2G36530.1 Poptr1|575698,Poptr1|689415  
 AT1G74030.1 Poptr1|687753  
 AT2G29560.1 Poptr1|686866  
 Poptr1|716772  
 Poptr1|356354  
 Poptr1|590699  
 Poptr1|596449  
 Poptr1|583995,Poptr1|641113  
 AT4G03170.1,AT4G03160.1,AT1G20600.1 Poptr1|579432  
 AT3G20480.1 Poptr1|571497  
 AT1G50730.1 Poptr1|65400  
 AT1G51100.1 Poptr1|661082  
 AT5G26760.2 Poptr1|666112  
 AT4G22030.1,AT4G04480.1  
 Poptr1|101160,Poptr1|101165,Poptr1|588580,Poptr1|568050,Poptr1|99314,Poptr1|568051,Poptr1|99316  
 Poptr1|588589,Poptr1|588586,Poptr1|99313,Poptr1|579088,Poptr1|584689,Poptr1|101161,Poptr1|101159  
 Poptr1|588588,Poptr1|579087,Poptr1|99315  
 AT3G45050.3 Poptr1|697744  
 AT1G78690.1 Poptr1|56050  
 ATCG00440.1 Poptr1|103815  
 AT5G20200.1 Poptr1|702307  
 Poptr1|560595  
 AT3G12650.1 Poptr1|557756  
 AT2G17710.1 Poptr1|356829,Poptr1|593786  
 AT5G41980.1 Poptr1|355473  
 AT5G35695.1  
 Poptr1|585621,Poptr1|571375,Poptr1|592331,Poptr1|558195,Poptr1|591125,Poptr1|346488,Poptr1|59644  
 5,Poptr1|591127,Poptr1|597645,Poptr1|585777,Poptr1|349494  
 Poptr1|573599  
 Poptr1|583933,Poptr1|64761  
 Poptr1|587582  
 Poptr1|582144  
 Poptr1|594676  
 AT4G11980.1 Poptr1|554275  
 AT2G26340.1 Poptr1|695131  
 AT3G19870.1 Poptr1|564189  
 AT3G15140.1 Poptr1|569161  
 AT2G47950.1,AT3G62990.1 Poptr1|572767,Poptr1|552643  
 AT1G71430.1 Poptr1|575035  
 AT1G51355.1 Poptr1|64477,Poptr1|560534,Poptr1|576338  
 AT4G39380.1 Poptr1|562746,Poptr1|558643  
 AT4G33865.1,AT3G43980.1,AT3G44010.1 Poptr1|663753,Poptr1|713962,Poptr1|642082,Poptr1|644046  
 AT2G36960.1 Poptr1|589465,Poptr1|701526  
 AT5G02520.1 Poptr1|107243,Poptr1|545573  
 AT3G06180.1 Poptr1|565318,Poptr1|565653  
 AT5G26620.1 Poptr1|565486,Poptr1|593709  
 AT1G48325.1  
 AT2G43110.1 Poptr1|732183  
 AT5G05740.1 Poptr1|720591  
 Poptr1|567290  
 AT4G30900.1 Poptr1|695216  
 Poptr1|669584  
 AT3G22300.1 Poptr1|75936  
 AT2G22640.1 Poptr1|571965  
 AT3G29185.2 Poptr1|556314  
 Poptr1|577693  
 AT3G02220.1 Poptr1|712848  
 AT5G03890.1,AT3G10120.1 Poptr1|653738,Poptr1|576595  
 AT1G78790.1 Poptr1|682774  
 AT2G04039.1 Poptr1|552682,Poptr1|573153  
 AT1G09920.1 Poptr1|643928  
 AT3G06600.1 Poptr1|570304,Poptr1|659106,Poptr1|354010  
 AT1G49410.1 Poptr1|649478,Poptr1|556420  
 AT4G13400.1 Poptr1|578418  
 AT3G23490.1 Poptr1|687004  
 Poptr1|590202  
 ATMG00830.1 Poptr1|594226  
 ATMG00960.1  
 AT4G35530.1 Poptr1|702020  
 AT2G35360.1 Poptr1|690005

AT5G35732.1,AT2G04795.1 Poptr1|573055,Poptr1|645017  
 AT1G16850.1 Poptr1|567781  
 AT5G64820.1 Poptr1|71735  
 AT1G22310.2 Poptr1|551584,Poptr1|72322  
 Poptr1|549842  
 AT3G19120.1 Poptr1|97490,Poptr1|557350  
 AT2G42220.1 Poptr1|583630  
 AT2G41950.1 Poptr1|717730  
 AT1G09520.1 Poptr1|354995,Poptr1|565467  
 AT3G17460.1  
 AT3G16730.1 Poptr1|596112,Poptr1|565557  
 AT4G14145.1 Poptr1|567617  
 AT4G24290.2 Poptr1|743087,Poptr1|65188  
 AT1G14780.1 Poptr1|726774,Poptr1|345337  
 AT1G28380.1 Poptr1|690116,Poptr1|555765  
 AT1G29690.1 Poptr1|545115,Poptr1|568494  
 Poptr1|572907  
 Poptr1|745544  
 Poptr1|348890  
 Poptr1|688867,Poptr1|560983  
 AT2G46540.1 Poptr1|644598  
 Poptr1|572409  
 AT1G30845.1 Poptr1|652021  
 AT2G20790.1 Poptr1|657933  
 AT4G21780.1 Poptr1|694065,Poptr1|593523  
 AT3G52960.1 Poptr1|703237  
 AT3G06050.1 Poptr1|573766  
 AT1G60740.1,AT1G65970.1,AT1G65980.1 Poptr1|683108,Poptr1|571552  
 AT3G27670.1 Poptr1|683912  
 AT1G75360.1 Poptr1|72939,Poptr1|550990  
 AT1G53760.1 Poptr1|589826  
 AT3G46430.1,AT5G59613.1 Poptr1|659708,Poptr1|720318  
 AT4G31560.1 Poptr1|547862,Poptr1|554988  
 AT2G02590.1 Poptr1|565426  
 AT1G20830.1 Poptr1|642782,Poptr1|559986  
 AT5G49150.1 Poptr1|103220,Poptr1|75438  
 AT4G16695.1 Poptr1|676401,Poptr1|553883  
 AT3G59490.1 Poptr1|703463  
 AT1G71780.1 Poptr1|693071  
 AT5G09225.1 Poptr1|576168  
 AT3G16040.1,AT1G15270.1 Poptr1|548838  
 AT3G04160.1 Poptr1|99744  
 AT5G20120.1 Poptr1|582944  
 AT3G61660.1 Poptr1|664087,Poptr1|552251  
 AT4G09060.1,AT1G14680.1 Poptr1|692633  
 AT5G42900.1 Poptr1|644117,Poptr1|677853  
 AT4G33980.1  
 AT5G46770.1 Poptr1|580074,Poptr1|590011  
 AT2G35215.1  
 AT3G32930.1 Poptr1|693108  
 AT1G18480.1 Poptr1|672300  
 AT1G70150.1 Poptr1|355010  
 AT3G57170.1 Poptr1|344117  
 Poptr1|576218  
 AT3G48195.1 Poptr1|570107  
 AT5G05560.1 Poptr1|353695  
 AT1G54650.1 Poptr1|571076  
 ATMG00110.1 Poptr1|102961,Poptr1|61606  
 AT2G31130.1 Poptr1|592186,Poptr1|574343  
 Poptr1|550302  
 AT2G41760.1 Poptr1|695537  
 AT4G28160.1,AT2G20870.1 Poptr1|682870  
 AT3G09860.1 Poptr1|688790  
 AT2G45860.1 Poptr1|572235  
 AT4G32560.1 Poptr1|654081  
 AT4G28820.1 Poptr1|692027  
 AT4G19810.1,AT4G19820.1 Poptr1|561291,Poptr1|104902,Poptr1|717157  
 AT4G19760.1,AT4G19800.1,AT4G19750.1,AT4G19720.1  
 AT4G19740.1,AT4G19730.1  
 AT4G19770.1  
 Poptr1|578788,Poptr1|669634  
 Poptr1|352995,Poptr1|352998  
 Poptr1|104639  
 AT1G36990.1,AT4G08510.1 Poptr1|347308,Poptr1|694538  
 AT1G68350.1 Poptr1|566600,Poptr1|564546  
 AT5G41270.1 Poptr1|554366  
 AT1G07020.1 Poptr1|557614  
 AT5G06280.1 Poptr1|576529  
 AT3G52520.1  
 AT5G44350.1,AT4G20880.1 Poptr1|550600,Poptr1|672206  
 AT1G78650.1 Poptr1|585498  
 AT2G30500.1 Poptr1|574467

AT4G14760.1,AT3G22790.1 Poptr1|566205  
 AT5G58320.2  
 AT3G10880.1  
 AT4G02710.1,AT1G03080.1  
 Poptr1|657188  
 AT3G15353.1 Poptr1|670071,Poptr1|568895  
 AT4G12970.1 Poptr1|553238  
 AT5G59460.1 Poptr1|650247  
 AT3G28455.1 Poptr1|701796  
 Poptr1|696305,Poptr1|698004  
 AT3G57320.1 Poptr1|695562  
 AT2G38790.1 Poptr1|563626,Poptr1|567975,Poptr1|593448  
 AT2G18540.1 Poptr1|563117  
 AT5G54410.1  
 AT4G36700.1  
 Poptr1|665423,Poptr1|347346  
 AT3G50430.1 Poptr1|71952  
 AT1G45150.1 Poptr1|573241  
 AT3G13845.1 Poptr1|678488,Poptr1|670522  
 AT5G16810.1 Poptr1|738378  
 AT5G14410.1 Poptr1|575258,Poptr1|549580  
 AT1G15220.1 Poptr1|553738  
 AT4G33740.1 Poptr1|550046,Poptr1|563322,Poptr1|557557  
 AT2G22795.1  
 AT4G37820.1  
 AT5G26790.1 Poptr1|581677  
 AT5G49525.1 Poptr1|659120  
 AT2G03780.1 Poptr1|659024  
 AT5G54850.1 Poptr1|700010,Poptr1|569107  
 AT1G51080.1 Poptr1|353119  
 AT1G15410.1 Poptr1|711824  
 AT5G46070.1 Poptr1|545251  
 AT1G03830.1  
 Poptr1|671026  
 Poptr1|678709,Poptr1|671028,Poptr1|586052  
 Poptr1|671027  
 Poptr1|75340  
 Poptr1|586051  
 Poptr1|573271,Poptr1|559151,Poptr1|590979  
 AT5G16520.1 Poptr1|596992  
 Poptr1|596991  
 AT3G20490.1 Poptr1|569136  
 AT5G35520.1 Poptr1|596452  
 AT2G16790.1 Poptr1|738337  
 AT4G31460.1 Poptr1|702102  
 AT5G27030.1 Poptr1|744575,Poptr1|56547  
 AT1G80490.1,AT1G15750.1 Poptr1|742882,Poptr1|740856  
 AT3G15880.2 Poptr1|695514,Poptr1|689182  
 AT3G16830.1  
 AT2G25420.1  
 Poptr1|716902,Poptr1|737271  
 Poptr1|596940  
 Poptr1|561933,Poptr1|58578  
 Poptr1|561934  
 AT5G55500.1 Poptr1|550155  
 AT3G19800.1 Poptr1|558716  
 AT1G69980.1 Poptr1|658353,Poptr1|565211  
 AT5G43750.1 Poptr1|698036  
 AT1G20770.1 Poptr1|559965  
 AT1G74640.1 Poptr1|580802  
 AT4G00310.1 Poptr1|572288,Poptr1|347995  
 AT4G14970.1 Poptr1|351293  
 AT1G09660.1 Poptr1|596753,Poptr1|690367  
 AT2G38610.1 Poptr1|577223,Poptr1|739780  
 AT5G56140.1,AT4G26480.1 Poptr1|672144,Poptr1|642696  
 AT3G08620.1  
 AT4G29660.1 Poptr1|661486  
 AT4G01880.1 Poptr1|711436  
 AT2G22370.1 Poptr1|718747  
 AT5G03770.1 Poptr1|576764  
 AT4G21445.1 Poptr1|555485,Poptr1|568310  
 AT3G14060.1,AT1G54120.1 Poptr1|673194,Poptr1|349434  
 AT1G27300.1 Poptr1|554770,Poptr1|548037  
 AT1G07120.1 Poptr1|49107,Poptr1|697448  
 AT1G48280.1 Poptr1|725566  
 AT3G25690.1 Poptr1|723812  
 AT4G18570.1 Poptr1|545202,Poptr1|687570  
 Poptr1|65878  
 Poptr1|658955  
 Poptr1|569320  
 AT3G56210.1 Poptr1|696755  
 AT3G52240.1 Poptr1|563625

AT4G02715.1 Poptr1|694705,Poptr1|551156  
AT4G28260.1 Poptr1|56850  
Poptr1|96830  
AT5G01590.1 Poptr1|577043  
AT2G43400.1 Poptr1|741498  
AT3G19184.1 Poptr1|557373,Poptr1|557374  
AT5G58280.1  
Poptr1|696035,Poptr1|581504,Poptr1|557371,Poptr1|579013,Poptr1|557372,Poptr1|581505,Poptr1|71994  
Poptr1|672233  
AT3G54480.1 Poptr1|639844  
Poptr1|590281,Poptr1|555019  
AT5G50410.1 Poptr1|666666,Poptr1|570254  
Poptr1|575354  
AT3G09210.1 Poptr1|560859  
AT4G29560.1 Poptr1|352089  
AT2G01590.1 Poptr1|698179  
AT3G62360.1 Poptr1|644860  
Poptr1|644859  
AT5G39940.1 Poptr1|556240  
AT3G49890.1 Poptr1|709568  
AT1G34380.1 Poptr1|592222  
AT4G38080.1,AT2G22510.1  
Poptr1|75540,Poptr1|75539,Poptr1|562389,Poptr1|577339,Poptr1|577327,Poptr1|103014,Poptr1|75541,P  
optr1|577319,Poptr1|681000  
AT5G20935.1 Poptr1|556890  
AT5G14030.1 Poptr1|597101,Poptr1|691669  
AT5G02410.1 Poptr1|685749  
AT5G26940.1 Poptr1|671736  
AT4G19980.1 Poptr1|97388,Poptr1|350059  
AT1G75730.1 Poptr1|346698,Poptr1|694843  
AT1G73380.1 Poptr1|555581  
AT3G59850.1,AT2G43870.1  
Poptr1|585095,Poptr1|99565,Poptr1|53038,Poptr1|594285,Poptr1|585092,Poptr1|585104,Poptr1|585102,  
Poptr1|562099,Poptr1|695718,Poptr1|108375,Poptr1|353172,Poptr1|585081  
AT4G18180.1 Poptr1|556757  
AT2G41850.1,AT3G57510.1 Poptr1|351537,Poptr1|735000  
AT2G43890.1 Poptr1|562085,Poptr1|585108,Poptr1|99573  
AT1G65570.1 Poptr1|698448  
AT3G26610.1 Poptr1|565180  
AT1G48100.1 Poptr1|723995,Poptr1|353979  
AT1G80170.1 Poptr1|691196  
AT1G60590.1 Poptr1|345546  
AT4G13760.1,AT1G43100.1,AT2G33160.1,AT2G15450.1,AT1G43090.1,AT2G15460.1,AT1G78400.1,AT2G15470.1,A  
T2G26620.1,AT1G17150.1,AT1G43080.1,AT2G40310.1 Poptr1|550309,Poptr1|558011  
AT5G17200.1 Poptr1|561885,Poptr1|578195  
AT3G07840.1,AT3G07820.1,AT3G07830.1,AT5G48140.1 Poptr1|53335,Poptr1|60440,Poptr1|592632  
AT1G02790.1 Poptr1|552472,Poptr1|342896,Poptr1|105911  
AT2G43860.1  
AT2G43880.1  
AT1G05650.1,AT1G05660.1  
AT5G14650.1  
AT4G32375.1,AT4G32380.1,AT4G32370.1  
AT5G44840.1,AT4G35670.1,AT5G44830.1,AT5G27530.1  
AT3G15720.1  
AT3G14040.1,AT3G07850.1  
Poptr1|585105,Poptr1|75264,Poptr1|55666,Poptr1|104360  
Poptr1|585083  
Poptr1|105430  
Poptr1|726299  
Poptr1|569538  
Poptr1|586749  
Poptr1|588667  
Poptr1|565568,Poptr1|565569,Poptr1|565526,Poptr1|597399  
AT1G66570.1,AT5G43610.1,AT1G22710.1,AT1G71890.1,AT2G14670.1,AT1G71880.1  
Poptr1|592216,Poptr1|593025,Poptr1|702566  
AT1G09960.1 Poptr1|710028  
AT2G02860.1 Poptr1|55154,Poptr1|354422  
AT5G06170.1  
AT2G15890.1 Poptr1|557326  
AT1G55280.1 Poptr1|351025  
AT3G57440.1 Poptr1|560504  
AT2G35035.1 Poptr1|702841  
AT1G48360.1 Poptr1|348688  
AT2G20495.1 Poptr1|694767  
AT3G14280.1 Poptr1|584160,Poptr1|553823  
AT5G63480.1 Poptr1|570271,Poptr1|575371  
AT1G19580.1 Poptr1|715237,Poptr1|593915,Poptr1|550998  
AT5G63510.1,AT3G48680.1 Poptr1|570284,Poptr1|733653  
AT5G66510.1  
AT1G47260.1  
Poptr1|107204  
Poptr1|590492



AT1G32810.1 Poptr1|550450,Poptr1|661270  
Poptr1|569280  
AT2G38000.1 Poptr1|695392  
Poptr1|576908  
AT5G01350.1 Poptr1|668059,Poptr1|560927  
AT1G79260.1 Poptr1|659382  
AT4G37090.1 Poptr1|655218  
AT2G41060.1,AT3G56860.1 Poptr1|734640,Poptr1|560285  
AT3G15010.1 Poptr1|550307  
AT2G22100.1  
AT2G18830.1  
Poptr1|349040  
Poptr1|558592  
Poptr1|576277,Poptr1|568729,Poptr1|352268,Poptr1|555692  
AT4G14500.1,AT3G23080.1 Poptr1|564926  
AT1G64720.1 Poptr1|727299,Poptr1|642519  
AT3G13062.2,AT1G55960.1 Poptr1|582207  
Poptr1|593457  
Poptr1|574668,Poptr1|569613  
Poptr1|642520  
AT2G25270.1 Poptr1|561940,Poptr1|738099  
AT1G71110.1 Poptr1|566526  
AT2G12400.1  
AT1G80540.1  
Poptr1|669107,Poptr1|705530  
AT5G37720.1,AT1G66260.1 Poptr1|714162,Poptr1|692145  
AT5G02530.1 Poptr1|691416,Poptr1|100817  
AT5G59950.1  
Poptr1|705175  
AT3G52200.1 Poptr1|696977  
AT1G54220.1,AT3G13930.1 Poptr1|685065  
Poptr1|583759  
Poptr1|681657  
AT1G49050.1 Poptr1|596479  
AT4G33490.1 Poptr1|75668,Poptr1|685159  
AT1G44130.1 Poptr1|559257,Poptr1|551432  
AT1G77480.1  
Poptr1|673720  
AT3G52140.1 Poptr1|64591,Poptr1|686813  
AT1G15290.1 Poptr1|59583  
AT4G28080.1 Poptr1|578701  
AT1G01320.1  
Poptr1|561366  
Poptr1|578700,Poptr1|561367  
Poptr1|571404  
AT2G05950.1  
Poptr1|349405,Poptr1|349222,Poptr1|101603,Poptr1|98395,Poptr1|100724,Poptr1|546077,Poptr1|545972,  
Poptr1|352317,Poptr1|65755,Poptr1|106138,Poptr1|100796,Poptr1|545715,Poptr1|106683,Poptr1|545968,Poptr1|719  
20,Poptr1|63973,Poptr1|103123,Poptr1|357039,Poptr1|65761,Poptr1|103868,Poptr1|101280,Poptr1|100564,Poptr1|35  
2388,Poptr1|64825,Poptr1|104136,Poptr1|351980,Poptr1|101463,Poptr1|101268,Poptr1|351253,Poptr1|104113,Poptr  
1|351790,Poptr1|101054,Poptr1|102951,Poptr1|106782,Poptr1|97244,Poptr1|103207,Poptr1|64354,Poptr1|355684,Pop  
tr1|349872,Poptr1|100519,Poptr1|103402,Poptr1|63930,Poptr1|99863,Poptr1|71986,Poptr1|63909,Poptr1|98955,Pop  
tr1|103800,Poptr1|102928,Poptr1|98037,Poptr1|102275,Poptr1|65783,Poptr1|577889,Poptr1|349615,Poptr1|97710,Pop  
tr1|103003,Poptr1|98035,Poptr1|355888,Poptr1|76049,Poptr1|65858,Poptr1|75280,Poptr1|573362,Poptr1|105834,Pop  
tr1|349221,Poptr1|98347,Poptr1|105501,Poptr1|99932,Poptr1|103008,Poptr1|106374,Poptr1|101514,Poptr1|98923,Pop  
tr1|75813,Poptr1|101584,Poptr1|101732,Poptr1|563034,Poptr1|349187,Poptr1|352059,Poptr1|100975,Poptr1|7600  
4,Poptr1|102242,Poptr1|545894,Poptr1|352413,Poptr1|349186,Poptr1|65482,Poptr1|65127,Poptr1|349413,Poptr1|544  
961,Poptr1|103811,Poptr1|103729,Poptr1|72232,Poptr1|545999,Poptr1|72281,Poptr1|101357,Poptr1|72262,Poptr1|65  
917,Poptr1|355770,Poptr1|107590,Poptr1|72317,Poptr1|357166,Poptr1|101709,Poptr1|102893,Poptr1|98392,Poptr1|1  
06302,Poptr1|63029,Poptr1|64046,Poptr1|106746,Poptr1|105738,Poptr1|97454,Poptr1|355387,Poptr1|105176,Poptr1|  
562921,Poptr1|100954,Poptr1|106315,Poptr1|573999,Poptr1|65373,Poptr1|105778,Poptr1|545373,Poptr1|98046,Poptr  
1|349410  
AT2G29420.1,AT2G29490.1,AT2G29450.1,AT2G29440.1,AT2G29460.1,AT2G29480.1,AT2G29470.1  
Poptr1|560270,Poptr1|56757,Poptr1|569772,Poptr1|574962,Poptr1|719987,Poptr1|588945,Poptr1|576045,  
Poptr1|576992,Poptr1|565860,Poptr1|597447  
AT1G10360.1 Poptr1|565410,Poptr1|587490  
AT3G09270.1 Poptr1|688805  
AT1G17180.1,AT1G78360.1,AT1G78340.1,AT1G78370.1,AT1G17170.1,AT1G78380.1  
Poptr1|707894,Poptr1|550400,Poptr1|550402,Poptr1|569148,Poptr1|596607,Poptr1|691894,Poptr1|65698,  
Poptr1|569151,Poptr1|687630,Poptr1|49443,Poptr1|550393,Poptr1|550394,Poptr1|550397  
AT1G74590.1,AT5G62480.1 Poptr1|59850  
AT1G27130.1,AT1G27140.1,AT1G69920.1,AT1G69930.1  
AT1G59670.1,AT1G59700.1  
AT1G10370.1  
AT1G53680.1  
AT3G43800.1  
AT1G78320.1,AT1G17190.1  
Poptr1|597354,Poptr1|657352,Poptr1|657350,Poptr1|565863,Poptr1|553271,Poptr1|565029,Poptr1|72602  
9,Poptr1|345484  
Poptr1|677565,Poptr1|658116,Poptr1|658120  
Poptr1|567710,Poptr1|107736  
Poptr1|696343,Poptr1|658122,Poptr1|658118,Poptr1|105561,Poptr1|107903,Poptr1|565861,Poptr1|59621

Poptr1|671156,Poptr1|65696,Poptr1|550403  
 Poptr1|597223,Poptr1|660896,Poptr1|568836,Poptr1|568837,Poptr1|98383,Poptr1|705669  
 Poptr1|550401  
 Poptr1|739015  
 Poptr1|568838  
 Poptr1|642449  
 Poptr1|556042,Poptr1|545541  
 Poptr1|585833,Poptr1|568835,Poptr1|670248  
 Poptr1|569153  
 Poptr1|583059,Poptr1|569150,Poptr1|569149  
 Poptr1|351698  
 Poptr1|108059  
 Poptr1|585834  
 Poptr1|354304  
 AT1G71240.1 Poptr1|63874  
 AT2G21720.1 Poptr1|56728  
 AT1G48840.1,AT3G18350.1 Poptr1|569816,Poptr1|57510  
 AT5G23390.1 Poptr1|563422  
 Poptr1|691244  
 Poptr1|674878  
 AT4G36790.1 Poptr1|563099  
 AT1G78130.1 Poptr1|582638,Poptr1|103774,Poptr1|75730  
 AT2G18590.1  
 AT5G10190.1  
 AT5G13740.1,AT5G13750.1 Poptr1|686565  
 Poptr1|579134,Poptr1|594291  
 Poptr1|351315,Poptr1|734644  
 AT3G27925.1 Poptr1|706718  
 AT5G39830.1 Poptr1|694089  
 Poptr1|577786  
 AT1G32230.1,AT2G35510.1 Poptr1|554061,Poptr1|702946  
 AT5G62520.1,AT3G47720.1 Poptr1|575162,Poptr1|570092  
 AT1G70440.1,AT1G23550.1  
 Poptr1|551727,Poptr1|108299,Poptr1|558968  
 AT3G22260.2 Poptr1|652462,Poptr1|688656  
 AT3G02070.1 Poptr1|732004  
 AT5G04250.1 Poptr1|655877  
 AT5G03330.1 Poptr1|745925,Poptr1|589459  
 Poptr1|563715,Poptr1|725034  
 AT5G04140.2 Poptr1|695596,Poptr1|734780  
 AT5G53460.1 Poptr1|594762,Poptr1|700801  
 AT2G41220.1  
 Poptr1|590208  
 Poptr1|593753  
 Poptr1|590800  
 Poptr1|583562  
 AT2G33570.1 Poptr1|715738  
 AT4G20170.1,AT5G44670.1 Poptr1|63271,Poptr1|712648  
 AT3G07380.1,AT3G60990.1,AT5G48190.1  
 AT5G46410.1 Poptr1|586980,Poptr1|568466  
 AT5G45700.1 Poptr1|568661,Poptr1|545127  
 AT5G11860.1 Poptr1|708690,Poptr1|554801  
 AT4G18140.1  
 AT1G29770.1,AT1G29780.1  
 AT1G09850.1 Poptr1|559786  
 AT4G35350.1 Poptr1|595022  
 AT5G50260.1 Poptr1|575269,Poptr1|666563,Poptr1|662080  
 AT1G20850.1 Poptr1|346542,Poptr1|715678  
 AT3G54940.3 Poptr1|55615  
 AT2G21430.1,AT4G39090.1 Poptr1|649354,Poptr1|648662  
 AT5G45890.1  
 Poptr1|71775,Poptr1|98245,Poptr1|546431,Poptr1|555684,Poptr1|55900,Poptr1|75888,Poptr1|545190,Poptr1|105433,Poptr1|595297,Poptr1|107991,Poptr1|51765  
 AT4G16190.1 Poptr1|692954,Poptr1|652004  
 AT3G48340.1,AT3G48350.1  
 AT2G22160.1  
 AT2G34080.1,AT3G49340.1,AT1G29110.1,AT2G27420.1,AT1G29080.1,AT1G29090.1  
 AT2G27395.1  
 Poptr1|713838  
 Poptr1|550956  
 Poptr1|105009,Poptr1|565118,Poptr1|55032  
 Poptr1|574345  
 Poptr1|570185  
 Poptr1|582502  
 Poptr1|591262,Poptr1|75897,Poptr1|75900,Poptr1|592182  
 Poptr1|595299  
 Poptr1|555685  
 AT3G08490.1 Poptr1|722780,Poptr1|641364  
 AT1G45688.1,AT5G42860.1 Poptr1|710606,Poptr1|677872  
 AT2G41990.1 Poptr1|648844,Poptr1|686637  
 AT4G35170.1

Poptr1|640861,Poptr1|553729,Poptr1|584035  
Poptr1|76101  
AT3G19080.1,AT1G49520.1 Poptr1|744225  
AT3G03590.1 Poptr1|730132  
AT4G34290.1,AT2G14880.1 Poptr1|549974,Poptr1|697374  
AT4G26810.1 Poptr1|575762  
AT3G48600.1,AT1G31760.1,AT2G35605.1  
Poptr1|71961  
AT1G66170.1 Poptr1|552897  
AT2G01810.1 Poptr1|564690  
AT2G07714.1,ATMG00550.1  
Poptr1|594794,Poptr1|593541,Poptr1|350459  
Poptr1|545508  
AT1G67990.1,AT1G67980.1 Poptr1|55191,Poptr1|564687  
AT3G62000.1,AT3G61990.1 Poptr1|348200  
AT4G34050.1 Poptr1|722225,Poptr1|691730  
AT4G26220.1 Poptr1|704601  
AT1G24735.1  
Poptr1|582675  
AT4G18160.1,AT5G46370.1 Poptr1|586969,Poptr1|568458  
AT4G01840.1 Poptr1|348427,Poptr1|572537  
AT5G55630.1 Poptr1|353118,Poptr1|684036,Poptr1|353117  
AT5G46360.1  
AT1G02510.1  
Poptr1|559482,Poptr1|551243  
AT3G51280.1 Poptr1|553985,Poptr1|553984,Poptr1|346355  
AT4G20900.1,AT5G44330.1 Poptr1|582584,Poptr1|550608  
AT5G48850.1 Poptr1|681760,Poptr1|348950,Poptr1|554834  
AT1G49940.1,AT1G04770.1  
Poptr1|558053  
Poptr1|586693  
AT5G14360.1 Poptr1|64869  
AT3G51780.1 Poptr1|557651,Poptr1|706604  
AT5G52060.1 Poptr1|688606,Poptr1|699276  
AT5G40630.1  
AT5G07220.1,AT5G62100.1  
Poptr1|688843  
Poptr1|709451,Poptr1|350168  
AT5G24400.1 Poptr1|574689,Poptr1|675499,Poptr1|355377,Poptr1|732797  
AT1G13700.1 Poptr1|659198,Poptr1|720875  
AT5G24410.1,AT5G24420.1,AT3G49360.1  
Poptr1|589174  
Poptr1|569602  
Poptr1|574688  
Poptr1|105856  
AT3G27960.1 Poptr1|696682,Poptr1|355879,Poptr1|733302  
AT4G10840.1 Poptr1|688189  
AT2G31240.1 Poptr1|72872  
AT1G27500.1  
Poptr1|709112,Poptr1|552296,Poptr1|684837  
Poptr1|640313  
Poptr1|552297  
AT5G47240.1 Poptr1|589896,Poptr1|693625  
AT5G47650.1 Poptr1|642311,Poptr1|57837  
AT4G25434.2  
AT2G04440.1  
Poptr1|582970  
Poptr1|652362,Poptr1|573112,Poptr1|343535  
Poptr1|739941  
AT5G39890.1 Poptr1|545766  
AT1G18490.1 Poptr1|742425,Poptr1|729116  
AT3G58670.1,AT2G42670.1 Poptr1|568704,Poptr1|555667  
AT5G15120.1  
AT2G22620.1,AT4G37950.1 Poptr1|730697  
AT1G09910.1 Poptr1|716387,Poptr1|551699  
AT1G65210.1  
AT1G09880.1  
AT1G09890.1  
AT4G38030.1  
Poptr1|352580  
Poptr1|352579  
Poptr1|551701  
Poptr1|551702  
Poptr1|568044  
AT3G23530.1,AT3G23510.1 Poptr1|345462  
AT3G23480.1,AT3G23470.1  
AT3G23460.1  
Poptr1|565801  
Poptr1|585732  
Poptr1|595189  
Poptr1|565802  
Poptr1|565804,Poptr1|565803,Poptr1|565805,Poptr1|565806,Poptr1|104237

AT3G14420.1,AT3G14415.1 Poptr1|583055,Poptr1|568833  
AT3G14150.1,AT3G14130.1 Poptr1|349653,Poptr1|693666,Poptr1|693667  
Poptr1|555599  
AT3G11210.1 Poptr1|698501,Poptr1|564018  
AT5G45920.1 Poptr1|687573,Poptr1|693968  
AT5G62930.1 Poptr1|728841  
Poptr1|701611,Poptr1|735828,Poptr1|560910  
Poptr1|576967  
Poptr1|555710  
Poptr1|591008  
Poptr1|591009  
AT2G01170.1 Poptr1|345278,Poptr1|55248  
Poptr1|562518,Poptr1|643572,Poptr1|558461,Poptr1|643573  
Poptr1|643571  
Poptr1|551408,Poptr1|564568  
AT2G21170.1 Poptr1|713199,Poptr1|721808  
AT3G55440.1 Poptr1|656103,Poptr1|698577  
Poptr1|691399,Poptr1|558071  
AT1G09360.1 Poptr1|97597  
AT1G09370.1  
AT3G12880.1 Poptr1|75980  
AT4G15750.1  
ATCG00150.1 Poptr1|566779  
AT2G34780.1 Poptr1|65920  
AT1G66840.1,AT5G38150.1 Poptr1|553064  
AT5G10660.1,AT5G24880.1 Poptr1|583147  
AT5G26230.1 Poptr1|566274  
Poptr1|564815  
AT3G09770.1 Poptr1|576682,Poptr1|589425  
AT5G19080.1,AT3G06140.1 Poptr1|354939,Poptr1|565648  
AT3G53410.1  
AT5G03200.1  
Poptr1|570874,Poptr1|742246  
AT3G09180.1 Poptr1|576511  
AT4G28300.1 Poptr1|59048  
Poptr1|672261  
AT5G62760.1 Poptr1|581349  
AT4G08320.2 Poptr1|72453  
AT1G62740.1,AT1G12270.1 Poptr1|690143,Poptr1|554224  
AT4G12400.2  
AT5G61530.1 Poptr1|742638  
AT3G24255.1,AT3G23910.1 Poptr1|65067  
AT5G41860.1 Poptr1|548349  
AT2G04620.1 Poptr1|356854  
AT1G66980.1,AT4G26690.1,AT1G66970.1,AT5G55480.1 Poptr1|691811,Poptr1|550159,Poptr1|550156  
AT5G58170.1,AT5G58050.1 Poptr1|578776  
AT3G20520.1  
Poptr1|642264  
Poptr1|672907  
Poptr1|352300  
Poptr1|352299  
AT1G24764.1,AT1G68060.1 Poptr1|686285,Poptr1|566434  
AT4G17220.1 Poptr1|717279  
AT1G14840.1,AT2G01750.1  
Poptr1|351406,Poptr1|576167  
Poptr1|596682  
AT3G54630.1 Poptr1|63890  
AT3G15750.1,AT1G34570.1 Poptr1|547848  
AT1G19870.1 Poptr1|550914  
AT1G76770.1 Poptr1|551314,Poptr1|559382  
AT1G14150.1 Poptr1|682616  
AT3G20660.1 Poptr1|699130  
AT1G79360.1,AT1G16390.1 Poptr1|57933  
AT1G73220.1 Poptr1|355152,Poptr1|580606  
AT1G16370.1,AT1G79410.1  
Poptr1|567109  
Poptr1|560415  
AT1G75010.1 Poptr1|696473,Poptr1|658652  
AT1G45474.1 Poptr1|591943  
AT1G61520.1 Poptr1|573150  
AT3G27690.1,AT2G05100.1,AT2G05070.1 Poptr1|341557,Poptr1|573081  
AT3G61470.1 Poptr1|548030,Poptr1|711741  
AT3G47470.1 Poptr1|581377  
AT3G08940.2,AT5G01530.1 Poptr1|576961,Poptr1|560901  
AT4G10340.1 Poptr1|690128  
AT1G19150.1 Poptr1|589310  
AT5G54270.1 Poptr1|568973,Poptr1|582091  
AT1G76570.1 Poptr1|694933  
AT2G40100.1 Poptr1|686447  
AT2G34420.1,AT1G29930.1,AT1G29920.1,AT1G29910.1,AT2G34430.1  
Poptr1|715461,Poptr1|568456,Poptr1|652073  
AT1G15820.1 Poptr1|682100,Poptr1|548759

AT3G54890.1 Poptr1|724962,Poptr1|563752  
AT5G28450.1  
Poptr1|551858  
Poptr1|566307  
Poptr1|709740  
AT1G77670.1 Poptr1|551478  
Poptr1|591634,Poptr1|51965,Poptr1|748535  
Poptr1|572646  
Poptr1|681282  
AT3G05937.1,AT5G26731.1 Poptr1|581586  
AT1G67623.1 Poptr1|570715,Poptr1|65038  
ATCG00770.1 Poptr1|104683  
AT5G53930.1 Poptr1|579430,Poptr1|660905  
AT5G13540.2 Poptr1|549388  
Poptr1|647334  
AT1G48200.1 Poptr1|692721  
AT3G60920.1,AT2G45540.1 Poptr1|730921,Poptr1|644363  
Poptr1|663849  
Poptr1|644362  
Poptr1|644361  
Poptr1|552072  
Poptr1|644359  
Poptr1|663851  
Poptr1|644360  
Poptr1|663852  
AT3G03150.1 Poptr1|596936  
AT2G43310.1 Poptr1|679572,Poptr1|654471  
AT5G02750.1 Poptr1|352556  
Poptr1|576622  
AT3G12380.1 Poptr1|698571  
AT5G28770.2 Poptr1|729825  
AT5G24800.1 Poptr1|583184  
AT3G23370.1 Poptr1|565778  
AT3G24490.1 Poptr1|702121  
Poptr1|553703  
AT1G12830.1 Poptr1|549768,Poptr1|597096  
AT1G79870.1 Poptr1|693696  
AT2G45630.2 Poptr1|700176,Poptr1|56985,Poptr1|710282,Poptr1|347899  
AT1G12550.1  
AT5G28310.1  
Poptr1|588703  
Poptr1|691269  
Poptr1|548548  
Poptr1|670298  
AT3G22680.1 Poptr1|564862  
Poptr1|353752  
AT4G28230.1 Poptr1|574597,Poptr1|663538  
AT1G78860.1,AT1G78850.1  
Poptr1|98348,Poptr1|568809,Poptr1|728310,Poptr1|568812,Poptr1|55927,Poptr1|568813,Poptr1|565510  
AT1G78830.1,AT1G78820.1  
Poptr1|585776,Poptr1|585517  
AT3G22160.1,AT4G15120.1 Poptr1|560114  
AT5G54390.1 Poptr1|568956,Poptr1|694024  
AT5G63980.1 Poptr1|650608,Poptr1|685957  
AT4G05090.1 Poptr1|694035  
AT5G64000.1,AT5G09290.1,AT5G63990.1  
Poptr1|579521  
AT5G02890.1 Poptr1|676437,Poptr1|349788  
AT4G02830.1 Poptr1|559544,Poptr1|692832  
AT4G18070.1 Poptr1|705094,Poptr1|660568  
AT1G76700.1,AT1G21080.1 Poptr1|694942,Poptr1|550692  
AT1G77020.1 Poptr1|342386,Poptr1|72535  
Poptr1|642732  
AT4G08455.1 Poptr1|72516  
AT2G24830.1 Poptr1|737411  
AT5G66160.1 Poptr1|593821  
AT1G71980.1 Poptr1|103013,Poptr1|702554  
AT4G09560.1  
AT1G22670.1  
AT1G35630.1,AT1G35625.1  
Poptr1|584343  
Poptr1|592251  
AT3G07550.1 Poptr1|577435  
Poptr1|573168  
AT2G24395.1 Poptr1|583188  
AT4G03510.1 Poptr1|693929,Poptr1|670982,Poptr1|743338,Poptr1|582702  
AT1G19310.1 Poptr1|740265,Poptr1|551914  
AT4G27470.1 Poptr1|670084,Poptr1|660967  
AT4G28270.1  
AT2G23780.1  
AT1G74990.1  
AT5G63135.1 Poptr1|570129

AT4G30810.1 Poptr1|578708  
AT1G11080.1,AT1G61130.1 Poptr1|568263,Poptr1|555534  
AT1G15000.1 Poptr1|564615,Poptr1|595362,Poptr1|656911  
AT3G02110.1 Poptr1|545862,Poptr1|668664  
AT3G10410.1 Poptr1|698686,Poptr1|696969  
AT5G23210.1 Poptr1|71795  
AT2G35770.1 Poptr1|344912,Poptr1|724940  
AT5G08260.1 Poptr1|686026  
AT3G45010.1,AT5G22980.1 Poptr1|584443  
AT4G12910.1,AT3G25420.1 Poptr1|700678  
AT4G30610.1 Poptr1|344497  
AT2G33530.1,AT1G28110.1 Poptr1|708823,Poptr1|554702  
AT5G42230.1,AT5G42240.1 Poptr1|551354  
AT3G63470.1 Poptr1|557828,Poptr1|697532,Poptr1|683848  
AT4G15100.1  
AT2G35780.1  
AT3G07990.1  
AT5G22960.1  
AT2G24000.1,AT2G24010.1  
AT2G12480.2  
AT1G43780.1  
AT3G52010.1,AT3G52000.1,AT3G52020.1,AT2G05850.1  
AT3G56540.1  
Poptr1|587944  
Poptr1|647734  
Poptr1|566496  
Poptr1|71796  
Poptr1|558308  
Poptr1|558307  
Poptr1|107016,Poptr1|574071  
Poptr1|578732  
Poptr1|592649,Poptr1|560367,Poptr1|560366,Poptr1|560360  
Poptr1|356125,Poptr1|733758  
Poptr1|576148,Poptr1|576136,Poptr1|576150  
Poptr1|675011  
Poptr1|576152  
Poptr1|559335  
Poptr1|64506  
AT3G13340.1,AT1G55680.1 Poptr1|708216,Poptr1|582533  
AT1G78070.2 Poptr1|651301,Poptr1|684482  
AT5G56190.2  
AT1G36070.1  
Poptr1|572899,Poptr1|560049,Poptr1|552844  
Poptr1|595677  
Poptr1|582341  
AT2G33390.1 Poptr1|697885,Poptr1|564980  
AT1G07770.1,AT5G59850.1,AT3G46040.1 Poptr1|656057,Poptr1|659722,Poptr1|684908,Poptr1|671191  
AT2G39590.1  
AT5G04670.1 Poptr1|660188,Poptr1|655804  
AT3G55120.1 Poptr1|687375  
AT5G66220.1  
AT2G25720.1 Poptr1|647772  
AT1G04270.1,AT5G09510.1 Poptr1|685381,Poptr1|658419,Poptr1|682000  
AT5G43640.1,AT5G09500.1  
AT5G63070.1  
AT1G33850.1,AT5G09490.1  
Poptr1|657251  
Poptr1|595401  
Poptr1|571056  
Poptr1|554329  
AT1G42990.1 Poptr1|694930  
AT5G13920.1,AT1G54930.1 Poptr1|557289  
AT5G58800.1 Poptr1|650149  
AT4G36750.1 Poptr1|741162,Poptr1|563112  
Poptr1|694146  
AT3G19780.1 Poptr1|75963  
AT2G05810.1 Poptr1|573013,Poptr1|343013  
AT5G50900.1 Poptr1|575431,Poptr1|570325  
AT1G61350.1 Poptr1|555490,Poptr1|660453  
AT2G45720.1 Poptr1|572180,Poptr1|644388  
AT1G01830.1  
AT1G71865.1 Poptr1|678080,Poptr1|665792  
AT4G01720.1 Poptr1|572520,Poptr1|552620  
AT4G04450.1,AT1G62300.1,AT4G22070.1 Poptr1|584695,Poptr1|568057,Poptr1|732261  
Poptr1|348620  
AT1G64050.1 Poptr1|646677,Poptr1|548410  
AT5G03120.1 Poptr1|675981,Poptr1|576663  
AT1G65090.1,AT5G36100.1 Poptr1|574044  
AT5G20900.1 Poptr1|695150  
AT3G43440.1  
AT4G00420.2,AT1G80650.1 Poptr1|554856  
AT4G29230.1 Poptr1|653319,Poptr1|582965

AT1G25580.1 Poptr1|566671  
 AT5G14490.1,AT3G01600.1 Poptr1|691582  
 AT4G28500.1 Poptr1|718263,Poptr1|545252,Poptr1|594624  
 AT5G56620.1  
 AT1G28470.1  
     Poptr1|582964  
     Poptr1|720167  
     Poptr1|580954  
 AT4G21500.1 Poptr1|568301,Poptr1|545001  
 AT2G48060.1 Poptr1|572793  
 AT1G02160.1 Poptr1|677649  
 AT2G39670.2 Poptr1|563910  
 AT3G19630.1 Poptr1|684007  
 AT1G60230.1  
 AT4G26310.1 Poptr1|547595  
 AT2G41680.1 Poptr1|560485  
 AT2G17420.1,AT4G35460.1 Poptr1|569200  
     Poptr1|105183  
     Poptr1|642580  
 AT5G23520.1 Poptr1|573602  
 AT5G11440.1,AT5G25540.1 Poptr1|561818  
 AT3G47850.1 Poptr1|699452  
 AT5G26594.1 Poptr1|553262  
     Poptr1|349066,Poptr1|58871  
     Poptr1|573776,Poptr1|587618  
     Poptr1|63124  
     Poptr1|547971  
     Poptr1|63125  
 AT1G11440.1 Poptr1|555442,Poptr1|568374  
 AT3G25130.1 Poptr1|645457  
 AT2G32360.1 Poptr1|594464,Poptr1|75462  
 AT1G75190.1 Poptr1|349152,Poptr1|100877  
 AT1G70200.1 Poptr1|657093  
 AT5G03670.1 Poptr1|676168  
 AT2G36420.1  
 AT1G26560.1 Poptr1|345146,Poptr1|55373  
 AT5G54570.1 Poptr1|571449  
 AT3G18070.1,AT3G18080.1 Poptr1|574973,Poptr1|728895  
 AT5G36890.1 Poptr1|687291  
 AT1G61810.1,AT1G61820.1 Poptr1|544846,Poptr1|555358  
 AT2G44480.1 Poptr1|583264,Poptr1|583253,Poptr1|583263  
 AT2G44450.1,AT2G25630.1,AT5G44640.1,AT3G60130.1,AT5G42260.1 Poptr1|63010,Poptr1|555827  
 AT1G45191.2,AT4G22100.1,AT1G60090.1  
 AT1G02850.2  
 AT4G21760.1  
 AT5G16580.1  
 AT1G47600.1  
 AT5G24550.1,AT5G24540.1  
 AT5G48375.1,AT5G26000.1,AT5G25980.2,AT1G51470.1  
 AT3G03640.1  
 AT3G62750.1,AT4G27820.1,AT3G62740.1,AT4G27830.1  
 AT1G51490.1  
     Poptr1|574974  
     Poptr1|705586  
     Poptr1|678730  
     Poptr1|545716,Poptr1|583406,Poptr1|705196,Poptr1|357161,Poptr1|583703,Poptr1|357165  
     Poptr1|98502  
     Poptr1|108291,Poptr1|103483  
     Poptr1|63798  
     Poptr1|583266  
     Poptr1|583265,Poptr1|581323  
     Poptr1|595371,Poptr1|709648,Poptr1|545729  
     Poptr1|556207  
 AT1G79450.1,AT3G12740.1,AT1G54320.1 Poptr1|686415,Poptr1|687280  
 AT5G46150.1 Poptr1|727817  
 AT1G16360.1  
     Poptr1|550346,Poptr1|648195,Poptr1|683247  
 AT5G51680.1 Poptr1|575707  
 AT1G73320.1 Poptr1|746486  
 AT1G79650.1,AT1G16190.1 Poptr1|350961,Poptr1|62809  
 AT3G02540.1 Poptr1|704158,Poptr1|354162,Poptr1|685099  
 AT5G38470.1  
 AT5G16090.1  
     Poptr1|698245  
 AT2G17975.1 Poptr1|593856  
 AT1G78410.1 Poptr1|568607,Poptr1|65605  
 AT3G52130.1 Poptr1|64589  
 AT3G07450.1  
 AT5G48480.1 Poptr1|684136  
 AT1G15190.1 Poptr1|579988,Poptr1|65177  
 AT3G01360.1 Poptr1|593935  
 AT1G79960.1 Poptr1|63789

Poptr1|349554  
AT5G17460.1 Poptr1|545417  
AT3G07470.1,AT3G07460.2 Poptr1|573209,Poptr1|348929  
AT1G61667.1 Poptr1|555443,Poptr1|660489  
AT5G19860.1 Poptr1|547636,Poptr1|693110  
AT5G54530.1 Poptr1|569042,Poptr1|571445  
AT1G55265.1 Poptr1|547635,Poptr1|555229,Poptr1|547634,Poptr1|547633  
AT5G16380.1  
AT2G39100.1 Poptr1|581750  
AT4G15470.1 Poptr1|565676,Poptr1|657636  
AT4G02690.1,AT1G03070.1 Poptr1|710634,Poptr1|685365  
AT3G63310.1  
Poptr1|551136  
Poptr1|564874  
AT3G14430.1 Poptr1|572462  
AT4G33905.1,AT2G14860.1 Poptr1|65268,Poptr1|557492  
AT5G43140.1  
AT3G21290.1 Poptr1|703265  
AT5G62090.1 Poptr1|575770,Poptr1|699286  
AT1G43850.1 Poptr1|559327,Poptr1|551368  
AT4G25515.1,AT4G25520.1  
Poptr1|350172  
Poptr1|594431,Poptr1|595377,Poptr1|589248,Poptr1|562429  
Poptr1|72531  
AT1G49800.1 Poptr1|65236,Poptr1|557444  
AT2G39550.1 Poptr1|696867  
AT3G29330.1 Poptr1|701860  
AT3G17390.1 Poptr1|572548,Poptr1|564333,Poptr1|570670,Poptr1|552593  
AT2G36880.1 Poptr1|689393  
AT4G01850.1,AT1G02500.1  
AT5G40600.1,AT3G27420.1 Poptr1|646343  
AT1G30950.1 Poptr1|676353  
AT2G17550.1 Poptr1|716171  
AT1G76550.1,AT1G20950.1 Poptr1|73215,Poptr1|550714  
AT1G12000.1 Poptr1|704902,Poptr1|698837  
AT4G04040.1  
Poptr1|560273  
Poptr1|679007  
Poptr1|568134  
Poptr1|679008  
Poptr1|568135  
Poptr1|568150  
AT3G22210.1 Poptr1|560237  
AT5G57420.1 Poptr1|580486  
AT4G26020.1 Poptr1|579018  
AT4G22140.1 Poptr1|687469,Poptr1|690469  
AT4G39100.1 Poptr1|697250,Poptr1|556513  
AT4G04260.1  
Poptr1|583591,Poptr1|645061,Poptr1|573000  
Poptr1|580851  
AT3G06780.1 Poptr1|565520,Poptr1|596093  
AT5G24280.1 Poptr1|569562  
AT3G08610.1 Poptr1|577224  
AT3G60380.1 Poptr1|692488,Poptr1|591796  
AT1G43245.1 Poptr1|559391  
AT2G26060.1 Poptr1|710584,Poptr1|64218  
AT5G52820.1,AT4G02730.1,AT3G49660.1,AT5G13480.1,AT4G29830.1  
Poptr1|746796,Poptr1|650010,Poptr1|683990  
AT2G43770.1 Poptr1|574420  
AT1G71840.1,AT2G41500.1  
Poptr1|740621,Poptr1|551164,Poptr1|702570,Poptr1|51865,Poptr1|696179,Poptr1|576250,Poptr1|344120  
AT5G16750.1 Poptr1|573797,Poptr1|571428  
AT4G32990.1  
AT5G64730.1  
AT2G05720.1,AT5G67320.1  
Poptr1|572785  
Poptr1|690869,Poptr1|350859  
Poptr1|561028  
Poptr1|51888  
Poptr1|683399  
AT3G62200.1 Poptr1|699666  
AT5G61180.1,AT5G61190.1  
AT3G61100.1,AT3G61090.1,AT3G62210.1  
AT3G62850.1  
Poptr1|570661,Poptr1|570663  
Poptr1|744392  
Poptr1|662537  
AT5G64170.1 Poptr1|640811  
Poptr1|63915  
AT2G21630.1 Poptr1|553121,Poptr1|700682  
AT4G14160.2,AT1G05520.1,AT3G23660.1 Poptr1|579998,Poptr1|65169  
AT5G43670.1 Poptr1|55093,Poptr1|354546



AT5G49740.1,AT5G49730.1 Poptr1|48637  
AT5G50160.1 Poptr1|345956,Poptr1|575229  
AT5G23980.1,AT5G23990.1 Poptr1|59634,Poptr1|556052  
AT4G14840.1,AT3G22520.1 Poptr1|354488  
AT3G17760.1 Poptr1|699634  
AT2G02010.1,AT2G02000.1 Poptr1|345354  
AT5G17330.1 Poptr1|648236,Poptr1|678573  
AT3G17720.1  
AT1G65960.1  
Poptr1|556087  
Poptr1|556086  
Poptr1|678571  
AT5G49800.1 Poptr1|742613  
AT5G65300.1 Poptr1|562556,Poptr1|558495  
AT1G49950.1 Poptr1|557527,Poptr1|49327  
AT5G67580.1,AT3G49850.1 Poptr1|53462,Poptr1|571967  
AT1G72740.1,AT1G17520.1 Poptr1|582938,Poptr1|561043  
AT1G54260.1  
AT3G17590.1 Poptr1|725576  
AT5G25500.1 Poptr1|561868  
AT3G24730.1 Poptr1|684015  
AT1G75710.1 Poptr1|692969  
AT5G54630.1,AT4G27240.1 Poptr1|699985,Poptr1|569056  
Poptr1|347295,Poptr1|559195  
Poptr1|715429  
Poptr1|544970  
AT5G39010.1,AT3G26390.1 Poptr1|352375  
AT3G46750.1 Poptr1|558036,Poptr1|549138  
AT1G01725.1 Poptr1|572241  
AT4G00530.1  
AT3G54390.1 Poptr1|690863  
AT3G02600.1 Poptr1|343109,Poptr1|546481  
AT1G15080.1 Poptr1|687176  
AT3G18220.1  
Poptr1|354205  
AT4G22160.2 Poptr1|568094,Poptr1|704901  
ATMG00480.1,AT2G07707.1 Poptr1|589114  
AT1G60780.1 Poptr1|726254,Poptr1|720204  
AT5G46630.2 Poptr1|702916,Poptr1|580086  
AT4G24550.2 Poptr1|684460  
AT1G10730.1  
AT5G52870.1 Poptr1|569438,Poptr1|670698  
AT4G11060.1 Poptr1|570744  
AT5G24500.1 Poptr1|574662,Poptr1|569612  
AT5G18850.1 Poptr1|657618,Poptr1|657950  
AT3G25120.1 Poptr1|684151  
AT5G02740.1 Poptr1|561532  
AT4G10890.1 Poptr1|349871  
AT5G60820.1,AT5G08139.1 Poptr1|569927  
AT5G20910.1 Poptr1|716783  
AT1G18760.1,AT1G21960.1,AT1G18770.1,AT5G53910.1,AT1G18780.1,AT2G29840.1  
Poptr1|75511,Poptr1|71513,Poptr1|548460,Poptr1|562457,Poptr1|352585,Poptr1|551449,Poptr1|562461,P  
optr1|108921  
AT1G26800.1 Poptr1|564210,Poptr1|567037  
AT1G60360.1 Poptr1|342430  
AT4G18110.1,AT5G54990.1 Poptr1|574311,Poptr1|574312,Poptr1|592207  
AT3G58720.1 Poptr1|572816  
AT2G40830.1,AT3G56580.1 Poptr1|682288,Poptr1|701293  
AT3G19950.1 Poptr1|558672,Poptr1|654963  
AT2G15580.1 Poptr1|738085,Poptr1|344465  
AT3G60080.1 Poptr1|583301  
AT1G68180.1 Poptr1|575663,Poptr1|570596  
AT4G26400.1,AT5G56340.1 Poptr1|693137,Poptr1|62667  
AT5G64920.1  
AT3G02340.1  
AT3G30460.1  
AT1G74620.1  
AT3G13228.1  
AT2G03000.1,AT1G14200.1  
AT3G10815.1  
AT1G50350.1  
AT2G44330.1  
AT3G13430.1,AT1G55530.1  
Poptr1|549771  
Poptr1|545881  
Poptr1|583887  
Poptr1|355160,Poptr1|743469  
Poptr1|573894,Poptr1|571232  
AT5G64290.1 Poptr1|683986,Poptr1|577371  
AT5G12860.1 Poptr1|722920,Poptr1|706278  
AT5G64280.1  
ATCG00580.1 Poptr1|728063

Poptr1|677266  
 AT2G32235.1 Poptr1|555428,Poptr1|584571  
 AT4G03150.1 Poptr1|572752  
 AT1G02780.1,AT4G02230.1 Poptr1|661397,Poptr1|59626,Poptr1|743493,Poptr1|544725  
 AT4G16030.1  
 AT3G16780.1  
 Poptr1|585875  
 Poptr1|700865  
 Poptr1|575019  
 AT1G71740.1 Poptr1|651631  
 AT1G25500.2 Poptr1|564506  
 AT1G62935.1 Poptr1|557045,Poptr1|350120  
 AT1G33055.1 Poptr1|550485,Poptr1|569244  
 AT4G18470.1 Poptr1|99964  
 AT1G52680.1 Poptr1|640638  
 AT1G15415.1  
 AT2G40660.1 Poptr1|738719  
 AT3G59980.1 Poptr1|673754  
 AT4G13780.1 Poptr1|597056,Poptr1|49256  
 AT5G02680.1  
 Poptr1|108209  
 AT2G38140.1 Poptr1|576947  
 AT5G39210.1 Poptr1|556308  
 AT1G19240.1 Poptr1|589335  
 AT5G18940.1 Poptr1|686170,Poptr1|686986  
 AT4G17270.1,AT5G47540.1 Poptr1|695658  
 AT2G03410.1  
 Poptr1|688647  
 Poptr1|667128  
 Poptr1|574101  
 Poptr1|342998,Poptr1|573052  
 Poptr1|553704,Poptr1|553707  
 AT5G40690.1 Poptr1|691609,Poptr1|641734  
 AT4G24230.1 Poptr1|592048  
 AT3G56360.1 Poptr1|738709  
 AT5G05250.1  
 AT5G16020.1 Poptr1|556158  
 AT1G08220.1 Poptr1|650559  
 AT5G07380.1 Poptr1|575495  
 AT5G54970.1,AT4G26960.1 Poptr1|351533  
 AT3G07760.1 Poptr1|700622  
 AT2G32350.1 Poptr1|594463  
 ATMG00570.1 Poptr1|747366,Poptr1|591301  
 AT1G07645.1 Poptr1|49021  
 AT3G11150.1 Poptr1|353690  
 AT2G43540.1 Poptr1|562190  
 AT5G08040.1 Poptr1|742374  
 ATMG00640.1 Poptr1|61608  
 AT1G69500.1 Poptr1|564227  
 AT3G48520.1,AT5G63450.1 Poptr1|549695,Poptr1|356043  
 AT1G63710.1 Poptr1|572270,Poptr1|712508  
 AT1G24540.1 Poptr1|583115,Poptr1|345520  
 AT2G27690.1 Poptr1|649118,Poptr1|571386,Poptr1|594809  
 AT2G21910.1,AT1G65340.1,AT4G32170.1,AT4G39500.1,AT1G47620.1,AT4G39510.1,AT4G39480.1,AT5G52320.1,AT4G39490.1,AT2G23180.1,AT1G57750.1 Poptr1|581333,Poptr1|75847,Poptr1|575715  
 AT5G08250.1,AT5G23190.1 Poptr1|562811,Poptr1|558688  
 AT5G58860.1 Poptr1|64287,Poptr1|557951  
 AT2G44890.1,AT2G45510.1 Poptr1|56982  
 AT1G34540.1,AT3G56630.1 Poptr1|576119,Poptr1|351364,Poptr1|102197  
 AT3G01900.1  
 AT4G00360.1,AT1G01600.1  
 AT2G45970.1  
 AT1G66030.1,AT5G02900.1  
 AT5G51900.1  
 Poptr1|342257,Poptr1|72854,Poptr1|588365,Poptr1|595766,Poptr1|551071  
 Poptr1|55700  
 Poptr1|558712,Poptr1|51676,Poptr1|354209  
 Poptr1|71541,Poptr1|575263,Poptr1|703937  
 Poptr1|566555  
 Poptr1|570553,Poptr1|663843,Poptr1|105731  
 Poptr1|593756,Poptr1|730915  
 Poptr1|575718,Poptr1|572135  
 Poptr1|678684,Poptr1|649120,Poptr1|654348  
 Poptr1|64647  
 AT5G65640.1,AT5G10570.1 Poptr1|551685  
 AT3G26360.1 Poptr1|658248  
 AT4G37445.1 Poptr1|674820  
 AT5G04010.1 Poptr1|351458  
 AT1G06500.1 Poptr1|551239  
 AT5G02810.1 Poptr1|567532,Poptr1|686518  
 AT5G24470.1 Poptr1|572468,Poptr1|574629,Poptr1|699541,Poptr1|348165  
 AT5G61380.1 Poptr1|97435

AT5G60100.1  
 AT2G46790.1,AT2G46670.1  
     Poptr1|732723  
 AT3G56720.1      Poptr1|652599,Poptr1|667287  
 AT5G20635.1      Poptr1|675860,Poptr1|668727  
 AT3G52070.1      Poptr1|557794  
 AT4G34600.1,AT2G16385.1      Poptr1|557216  
 AT3G56010.1      Poptr1|564055,Poptr1|659485  
 AT5G63050.1      Poptr1|570159,Poptr1|575196  
 AT1G67310.1      Poptr1|554769,Poptr1|548038  
 AT2G22300.1      Poptr1|562594  
 AT3G16940.1,AT4G16150.1      Poptr1|354049,Poptr1|723886  
 AT5G09410.1,AT5G64220.1  
     Poptr1|71635  
     Poptr1|698356  
 AT5G40480.1      Poptr1|64802  
 AT1G73120.1      Poptr1|679459,Poptr1|698765  
 AT3G01960.1      Poptr1|549720,Poptr1|597136  
 AT2G35530.1,AT1G32150.1      Poptr1|590067,Poptr1|349938  
 AT4G36730.1      Poptr1|593965  
 AT2G46270.1      Poptr1|731253,Poptr1|552242  
 AT4G01120.1  
     Poptr1|719452  
 AT5G04080.1      Poptr1|652633  
 AT5G01075.1      Poptr1|572051  
 AT5G65880.1      Poptr1|571991  
 AT4G21720.1      Poptr1|555816  
 AT3G11260.1      Poptr1|55494  
 AT2G33880.1      Poptr1|586070  
 AT3G18010.1      Poptr1|661686,Poptr1|666295  
 AT5G05770.1  
 AT5G45980.1  
 AT5G46010.1  
 AT2G01500.1  
 AT2G28610.1  
 AT5G41320.1      Poptr1|350236,Poptr1|548454  
 AT5G16950.1      Poptr1|548239  
 AT2G27590.1      Poptr1|556730  
     Poptr1|552086  
 AT5G14440.1      Poptr1|641672  
 AT5G40570.1  
 AT1G07985.1      Poptr1|64549  
 AT1G20070.1      Poptr1|559853,Poptr1|550861  
 AT5G16715.1      Poptr1|553010  
 AT1G14610.1      Poptr1|686136,Poptr1|558652  
 AT1G27160.1  
     Poptr1|108531  
     Poptr1|585307  
     Poptr1|545425  
     Poptr1|545426  
 AT4G39420.1      Poptr1|71749,Poptr1|562736  
 AT4G32070.1,AT2G25290.1      Poptr1|561937  
 AT4G30480.2      Poptr1|653635,Poptr1|737912  
 AT1G62390.1      Poptr1|584736,Poptr1|568163  
     Poptr1|669693  
 AT2G25570.1      Poptr1|64203  
 AT2G15020.1      Poptr1|557459  
 AT4G32570.1      Poptr1|352858,Poptr1|578148  
 AT3G61930.1      Poptr1|572459,Poptr1|348158  
 AT1G53460.1      Poptr1|65594  
 AT1G07840.1      Poptr1|651172  
 AT4G18740.1      Poptr1|555653,Poptr1|568684  
 AT1G18850.1      Poptr1|581352  
 AT3G60650.1      Poptr1|347827,Poptr1|591665  
 AT5G44080.1      Poptr1|694626  
 AT1G03970.1

A-R OGs in similarity approach

ArabidopsisRice

AT3G46290.1,AT5G59700.1      Orysa4|Os05g06990.1,Orysa4|Os06g22810.1  
 AT1G33260.1,AT4G10390.1  
     Orysa4|Os03g02190.1,Orysa4|Os02g43290.1,Orysa4|Os10g37190.1,Orysa4|Os04g45730.1  
 AT5G03140.1,AT3G53380.1      Orysa4|Os05g03450.1  
 AT1G67890.1,AT5G49470.2,AT3G06630.1,AT3G06640.1,AT3G06620.1      Orysa4|Os12g37570.1  
 AT2G45590.1,AT4G25390.1,AT5G51770.1      Orysa4|Os03g14710.1  
 AT1G24030.1      Orysa4|Os09g20880.1  
 AT3G62220.1,AT2G47060.4      Orysa4|Os05g04520.1  
 AT2G31800.1,AT2G43850.1,AT3G59830.1      Orysa4|Os01g66860.1  
 AT2G32800.1      Orysa4|Os11g25860.1  
 AT1G51940.1      Orysa4|Os01g53840.1  
 AT2G30740.1,AT3G02810.1,AT4G23310.1,AT2G39180.1,AT1G65790.1,AT3G27560.1,AT4G01330.1,AT2G39110.1,A  
 T1G66460.1,AT4G04490.1,AT4G04570.1,AT1G11340.1,AT5G24010.1,AT4G14780.1,AT4G23290.2,AT5G37790.1,AT

5G60300.1,AT5G54380.1,AT1G09440.1,AT3G24540.1,AT4G23240.1,AT3G08870.1,AT1G61440.1,AT4G23280.1,AT1G61480.1,AT3G55450.1,AT1G21250.1,AT3G57740.1,AT1G76360.1,AT3G54030.1,AT1G66880.1,AT1G61550.1,AT3G63260.1,AT4G25160.1,AT4G21230.1,AT5G35960.1,AT4G38830.1,AT5G65600.1,AT1G16120.1,AT1G70450.1,AT5G41260.1,AT2G17700.1,AT2G07020.1,AT4G21410.1,AT1G11280.1,AT1G61420.1,AT5G59270.1,AT5G01550.1,AT3G49060.1,AT5G13160.1,AT3G57700.1,AT5G01560.1,AT4G18250.1,AT5G39030.1,AT5G26150.1,AT5G02070.1,AT1G70250.1,AT5G11020.1,AT1G79680.1,AT5G18910.1,AT3G53840.1,AT1G48210.1,AT1G17910.1,AT2G19130.1,AT4G00710.1,AT5G01540.1,AT3G46760.1,AT1G14370.1,AT5G60090.1,AT5G35380.1,AT2G20300.1,AT5G60080.1,AT4G27300.1,AT5G22050.2,AT1G67520.1,AT1G01740.1,AT1G70110.1,AT3G46410.1,AT3G50730.1,AT3G17410.1,AT1G80640.1,AT4G21400.1,AT1G26940.1,AT1G14000.1,AT3G24790.1,AT5G35370.1,AT1G01540.2,AT1G21270.1,AT4G34440.1,AT2G41970.1,AT4G23220.1,AT3G59730.1,AT5G40540.1,AT2G11520.1,AT5G39020.1,AT2G18470.1,AT1G30570.1,AT1G67470.1,AT1G66930.1,AT5G06740.1,AT1G26150.1,AT1G21240.1,AT5G38250.1,AT1G49730.1,AT4G04960.1,AT3G51990.1,AT1G61460.1,AT3G21450.1,AT1G16160.1,AT3G59110.1,AT2G25220.1,AT3G59700.1,AT3G28690.2,AT5G47850.1,AT1G21230.1,AT1G10620.1,AT5G10520.1,AT2G40270.1,AT1G56720.1,AT2G30730.1,AT4G35230.1,AT1G52310.1,AT5G56790.1,AT3G59740.1,AT1G18390.1,AT1G16110.1,AT2G48010.1,AT3G01840.1,AT3G58690.1,AT1G49270.1,AT1G66910.1,AT1G15530.1,AT5G15080.1,AT4G23140.2,AT3G09830.1,AT4G11890.3,AT2G26290.1,AT5G16500.1,AT4G11470.1,AT3G58760.1,AT5G61350.1,AT4G31230.1,AT5G63940.1,AT4G28350.1,AT3G26700.1,AT3G45420.1,AT3G16030.1,AT5G11400.1,AT2G17090.1,AT4G23160.1,AT4G29050.1,AT3G18810.1,AT4G28670.1,AT2G02800.1,AT2G37710.1,AT1G74490.1,AT5G65500.1,AT4G02630.1,AT4G13190.1,AT4G23130.2,AT4G21300.1,AT3G45430.1,AT3G17420.1,AT1G50990.1,AT1G61390.1,AT1G11300.1,AT1G66920.1,AT2G28590.1,AT2G39360.1,AT1G21245.1,AT5G59260.1,AT2G24370.1,AT5G35580.1,AT5G54590.2,AT3G57730.1,AT4G23200.1,AT1G23540.1,AT3G46930.1,AT4G02010.1,AT5G38990.1,AT2G18890.1,AT1G07870.1,AT5G38210.1,AT5G56460.1,AT4G21370.1,AT5G18500.1,AT5G23170.1,AT5G47070.1,AT1G61610.1,AT4G38470.1,AT4G04500.1,AT1G61370.1,AT1G70530.1,AT5G12000.1,AT3G51550.1,AT4G27290.1,AT3G20530.1,AT4G35600.1,AT3G45920.1,AT3G59350.1,AT1G11050.1,AT2G39660.1,AT2G33580.1,AT2G41890.1,AT5G01850.1,AT5G01060.1,AT3G15890.1,AT2G16750.1,AT2G19410.1,AT5G39000.1,AT1G80370.1,AT5G60270.1,AT4G00970.1,AT5G50000.1,AT3G25490.1,AT1G61360.1,AT4G02420.1,AT2G24360.1,AT1G08720.1,AT1G78940.1,AT1G29720.1,AT3G52530.1,AT4G11900.1,AT1G79670.1,AT3G57120.1,AT5G28680.1,AT5G61560.1,AT3G45410.1,AT1G66790.1,AT1G52540.1,AT5G20050.1,AT3G59420.1,AT5G11850.1,AT5G50180.1,AT3G22750.1,AT1G19390.1,AT5G58950.1,AT2G05940.1,AT1G62400.1,AT4G02410.1,AT3G57720.1,AT4G05200.1,AT5G03320.1,AT5G65530.1,AT3G59750.1,AT5G24080.1,AT4G23180.1,AT1G21210.1,AT1G34300.1,AT4G00330.1,AT3G05140.1,AT1G69790.1,AT5G60900.1,AT5G42440.1,AT4G31110.1,AT1G61490.1,AT5G11410.1,AT4G11490.1,AT3G57750.1,AT3G55950.1,AT4G11480.1,AT1G16140.1,AT2G42960.1,AT4G23250.1,AT4G34500.1,AT1G17540.1,AT1G51620.1,AT4G31170.1,AT5G42120.1,AT2G21480.1,AT4G23300.1,AT5G58940.1,AT1G70520.1,AT1G55200.1,AT5G01020.1,AT5G55830.1,AT1G70130.1,AT1G70740.1,AT1G28390.1,AT1G61490.1,AT1G77280.1,AT5G11410.1,AT2G43700.1,AT2G43230.1,AT4G23050.2,AT4G23190.1,AT2G29220.1,AT1G16260.1,AT4G23320.1,AT2G17220.1,AT1G18160.1,AT4G32300.1,AT1G61500.1,AT1G72540.1,AT4G04540.1,AT3G20200.1,AT3G01490.1,AT4G03230.1,AT5G60280.1,AT3G57710.1,AT2G30940.2,AT1G26970.1,AT5G38240.1,AT3G57770.1,AT1G21590.1,AT5G61550.1,AT5G02800.1,AT3G560310.1,AT3G45440.1,AT3G55550.1,AT4G23210.1,AT3G45330.1,AT1G63500.1,AT1G11330.1,AT1G61590.1,AT4G35030.1,AT1G20650.1,AT4G32000.1,AT5G02290.1,AT2G45910.1,AT2G29250.1,AT3G24550.1,AT5G40380.1,AT4G11530.1,AT2G28250.1,AT5G38560.1,AT1G61400.1,AT2G28930.1,AT1G72760.1,AT1G61430.1,AT1G52290.1,AT1G48220.1,AT2G07180.1,AT4G00960.1,AT1G06700.1,AT1G61380.1,AT1G54820.1,AT5G57670.1,AT1G73660.1,AT1G76370.1,AT5G25440.1,AT3G19300.1,AT4G31100.1,AT5G18610.1,AT1G07570.1,AT2G23450.1,AT3G21630.1,AT4G04510.1,AT1G70460.1,AT1G11350.1,AT5G56890.1,AT3G04690.1,AT3G09010.1,AT1G16760.1,AT3G09240.1,AT5G46570.1,AT5G15730.1,AT5G66710.1,AT5G51270.1,AT1G16670.1,AT5G59010.1,AT4G23230.1,AT2G46850.1,AT3G45860.1,AT2G43690.1,AT3G01300.1,AT1G19090.1,AT2G23770.1,AT3G07070.1,AT2G28940.2,AT1G11410.1,AT5G10530.1,AT4G11460.1,AT2G42630.1,AT3G13690.1,AT4G39110.1,AT3G50720.1,AT1G67000.1,AT4G18950.1,AT4G23270.1,AT4G35780.1,AT4G23150.1,AT3G09780.1,AT5G57035.1,AT1G65800.1,AT1G16130.1,AT1G61860.1,AT1G69730.1,AT1G25390.1,AT5G60320.1,AT4G17660.1,AT4G23260.1,AT3G53810.1,AT4G21380.1,AT2G23200.1

Orysa4|Os04g30040.1,Orysa4|Os01g26210.1,Orysa4|Os01g28730.1,Orysa4|Os04g29960.1,Orysa4|Os01g04460.1,Orysa4|Os04g06090.1,Orysa4|Os01g04550.1,Orysa4|Os07g35140.1,Orysa4|Os09g09500.1,Orysa4|Os12g38610.1,Orysa4|Os09g37890.1,Orysa4|Os12g41540.1,Orysa4|Os07g35370.1,Orysa4|Os04g54070.1,Orysa4|Os10g39670.1,Orysa4|Os11g46810.1,Orysa4|Os10g40060.1,Orysa4|Os10g17910.1,Orysa4|Os05g32170.1,Orysa4|Os02g34430.1,Orysa4|Os07g35330.1,Orysa4|Os04g34320.1,Orysa4|Os07g35380.1,Orysa4|Os10g17950.1,Orysa4|Os01g21970.1,Orysa4|Os04g51050.1,Orysa4|Os12g02810.1,Orysa4|Os02g44610.1,Orysa4|Os10g30540.1,Orysa4|Os06g04880.1,Orysa4|Os09g30454.1,Orysa4|Os07g36570.1,Orysa4|Os07g04130.1,Orysa4|Os12g34320.1,Orysa4|Os04g29990.1,Orysa4|Os01g66250.1,Orysa4|Os04g23700.1,Orysa4|Os01g10450.1,Orysa4|Os12g16520.1,Orysa4|Os01g26280.1,Orysa4|Os08g35600.1,Orysa4|Os07g04810.1,Orysa4|Os09g16590.1,Orysa4|Os03g05470.1,Orysa4|Os07g03810.1,Orysa4|Os01g02420.1,Orysa4|Os11g44430.1,Orysa4|Os08g24630.1,Orysa4|Os09g09510.1,Orysa4|Os07g43560.1,Orysa4|Os02g12130.1,Orysa4|Os04g23760.1,Orysa4|Os02g30900.1,Orysa4|Os04g29770.1,Orysa4|Os07g30510.1,Orysa4|Os03g56160.1,Orysa4|Os01g71000.1,Orysa4|Os03g56470.1,Orysa4|Os02g42160.1,Orysa4|Os06g41980.1,Orysa4|Os08g18920.1,Orysa4|Os02g42780.1,Orysa4|Os01g66680.1,Orysa4|Os04g54190.1,Orysa4|Os07g18240.1,Orysa4|Os04g52630.1,Orysa4|Os04g54010.1,Orysa4|Os06g41500.1,Orysa4|Os04g30160.1,Orysa4|Os06g03610.1,Orysa4|Os07g14490.1,Orysa4|Os05g44290.1,Orysa4|Os04g34250.1,Orysa4|Os08g03100.1,Orysa4|Os03g15250.1,Orysa4|Os05g1190.1,Orysa4|Os08g15060.1,Orysa4|Os04g47620.1,Orysa4|Os04g51950.1,Orysa4|Os12g03670.1,Orysa4|Os01g02790.1,Orysa4|Os04g04670.1,Orysa4|Os06g22290.1,Orysa4|Os06g29080.1,Orysa4|Os01g02570.1,Orysa4|Os11g44260.1,Orysa4|Os12g03640.1,Orysa4|Os04g20680.1,Orysa4|Os07g35660.1,Orysa4|Os04g59000.1,Orysa4|Os09g09220.1,Orysa4|Os08g01830.1,Orysa4|Os01g48000.1,Orysa4|Os04g56090.1,Orysa4|Os01g45380.1,Orysa4|Os02g09359.1,Orysa4|Os11g44660.1,Orysa4|Os05g03920.1,Orysa4|Os04g34390.1,Orysa4|Os03g31260.1,Orysa4|Os10g41220.1,Orysa4|Os08g28710.1,Orysa4|Os05g13770.1,Orysa4|Os11g44860.1,Orysa4|Os01g41730.1,Orysa4|Os10g06140.1,Orysa4|Os04g34370.1,Orysa4|Os12g30180.1,Orysa4|Os01g40590.1,Orysa4|Os04g44910.1,Orysa4|Os07g35680.1,Orysa4|Os09g19510.1,Orysa4|Os02g09960.1,Orysa4|Os07g31290.1,Orysa4|Os07g03820.1,Orysa4|Os03g31000.1,Orysa4|Os03g53410.1,Orysa4|Os01g02360.1,Orysa4|Os01g48040.1,Orysa4|Os09g17970.1,Orysa4|Os01g36550.1,Orysa4|Os11g46950.1,Orysa4|Os09g37780.1,Orysa4|Os07g35290.1,Orysa4|Os08g03002.1,Orysa4|Os05g34950.1,Orysa4|Os05g28520.1,Orysa4|Os10g05160.1,Orysa4|Os09g39650.1,Orysa4|Os04g44900.1,Orysa4|Os11g35860.1,Orysa4|Os09g28180.1,Orysa4|Os01g12410.1,Orysa4|Os07g35410.1,Orysa4|Os03g12680.1,Orysa4|Os02g52850.1,Orysa4|Os05g25370.1,Orysa4|Os02g42110.1,Orysa4|Os08g03040.1,Orysa4|Os04g54120.1,Orysa4|Os03g56180.1,Orysa4|Os04g29930.1,Orysa4|Os07g36980.1,Orysa4|Os01g02840.1,Orysa4|Os02g42190.1,Orysa4|Os11g10690.1,Orysa4|Os12g42050.1,Orysa4|Os09g37800.1,Orysa4|Os05g14220.1,Orysa4|Os02g44920.1,Orysa4|Os11g11890.1,Orysa4|Os04g35890.1,Orysa4|Os07g35690.1,Orysa4|Os02g43430.1,Orysa4|Os07g04820.1,Orysa4|Os06g09230.1,Orysa4|Os03g61010.1,Orysa4|Os11g46880.1,Orysa4|Os03g12520.1,Orysa4|Os12g14480.1,Orysa4|Os04g34420.1,Orysa4|Os07g38250.1,Orysa4|Os09g16950.1,Orysa4|Os10g10030.1,Orysa4|Os05g17810.1,Orysa4|Os01g02800.1,Orysa4|Os01g02550.1,Orysa4|Os07g42200.1,Orysa4|Os10g02720.1,Orysa4|Os05g30820.1,Orysa4|Os07g35280.1,Orysa4|Os11g35274.1,Orysa4|Os11g35330.1,Orysa4|Os01g70970.1,Orysa4|Os11g46900.1,Orysa4|Os01g02350.1,Orysa4|Os06g0

7330.1,Orysa4|Os08g13420.1,Orysa4|Os01g54700.1,Orysa4|Os02g56380.1,Orysa4|Os03g43670.1,Orysa4|Os01g57940.1,Orysa4|Os04g01860.1,Orysa4|Os03g03410.1,Orysa4|Os01g54350.1,Orysa4|Os04g29680.1,Orysa4|Os06g06930.1,Orysa4|Os04g12580.1,Orysa4|Os04g56060.1,Orysa4|Os06g29340.1,Orysa4|Os02g56630.1,Orysa4|Os06g29810.1,Orysa4|Os03g61310.1,Orysa4|Os01g57100.1,Orysa4|Os04g22120.1,Orysa4|Os09g19380.1,Orysa4|Os12g31560.1,Orysa4|Os04g30010.1,Orysa4|Os04g03530.1,Orysa4|Os09g19390.1,Orysa4|Os04g56080.1,Orysa4|Os04g30270.1,Orysa4|Os06g13320.1,Orysa4|Os02g44600.1,Orysa4|Os10g01100.1,Orysa4|Os02g27310.1,Orysa4|Os01g04520.1,Orysa4|Os05g20150.1,Orysa4|Os04g35080.1,Orysa4|Os01g65010.1,Orysa4|Os04g35114.1,Orysa4|Os11g06780.1,Orysa4|Os04g34220.1,Orysa4|Os01g21960.1,Orysa4|Os05g07420.1,Orysa4|Os01g66020.1,Orysa4|Os04g12560.1,Orysa4|Os10g34220.1,Orysa4|Os09g24340.1,Orysa4|Os07g03840.1,Orysa4|Os01g66610.1,Orysa4|Os12g07990.1,Orysa4|Os10g17960.1,Orysa4|Os04g03830.1,Orysa4|Os04g30330.1,Orysa4|Os07g35580.1,Orysa4|Os11g40430.1,Orysa4|Os04g56120.1,Orysa4|Os01g01410.1,Orysa4|Os07g04040.1,Orysa4|Os07g04000.1,Orysa4|Os10g03990.1,Orysa4|Os07g35390.1,Orysa4|Os09g19700.1,Orysa4|Os02g02600.1,Orysa4|Os05g04460.1,Orysa4|Os04g30370.1,Orysa4|Os03g17300.1,Orysa4|Os10g10540.1,Orysa4|Os05g30870.1,Orysa4|Os05g47770.1,Orysa4|Os07g36544.1,Orysa4|Os01g38900.1,Orysa4|Os07g35310.1,Orysa4|Os01g57560.1,Orysa4|Os07g35650.1,Orysa4|Os07g03860.1,Orysa4|Os07g07390.1,Orysa4|Os03g21540.1,Orysa4|Os07g48730.1,Orysa4|Os04g15580.1,Orysa4|Os03g39150.1,Orysa4|Os01g02290.1,Orysa4|Os05g03620.1,Orysa4|Os01g02600.1,Orysa4|Os10g29540.1,Orysa4|Os09g38910.1,Orysa4|Os08g39210.1,Orysa4|Os12g08050.1,Orysa4|Os12g41530.1,Orysa4|Os01g02770.1,Orysa4|Os03g60150.1,Orysa4|Os10g04730.1,Orysa4|Os09g07730.1,Orysa4|Os01g02780.1,Orysa4|Os05g02020.1,Orysa4|Os11g45280.1,Orysa4|Os04g12540.1,Orysa4|Os02g41480.1,Orysa4|Os04g56110.1,Orysa4|Os02g48080.1,Orysa4|Os04g34330.1,Orysa4|Os05g07300.1,Orysa4|Os01g36790.1,Orysa4|Os03g13080.1,Orysa4|Os01g01740.1,Orysa4|Os04g01890.1,Orysa4|Os02g06930.1,Orysa4|Os03g60710.1,Orysa4|Os02g19530.1,Orysa4|Os01g57490.1,Orysa4|Os02g12810.1,Orysa4|Os09g37840.1,Orysa4|Os02g39560.1,Orysa4|Os01g49529.1,Orysa4|Os11g35260.1,Orysa4|Os10g39010.1,Orysa4|Os02g45750.1,Orysa4|Os02g50970.1,Orysa4|Os12g26940.1,Orysa4|Os01g53640.1,Orysa4|Os01g47820.1,Orysa4|Os12g33690.1,Orysa4|Os09g14580.1,Orysa4|Os07g49470.1,Orysa4|Os07g49240.1,Orysa4|Os11g10710.1,Orysa4|Os11g01390.1,Orysa4|Os11g26140.1,Orysa4|Os06g05070.1,Orysa4|Os11g46860.1,Orysa4|Os06g51170.1,Orysa4|Os01g12300.1,Orysa4|Os06g45280.1,Orysa4|Os04g53998.1,Orysa4|Os07g30410.1,Orysa4|Os03g55210.1,Orysa4|Os04g51030.1,Orysa4|Os05g42210.1,Orysa4|Os03g06330.1,Orysa4|Os11g47110.1,Orysa4|Os06g45350.1,Orysa4|Os04g21790.1,Orysa4|Os05g11750.1,Orysa4|Os03g04050.1,Orysa4|Os07g03780.1,Orysa4|Os11g40240.1,Orysa4|Os03g12150.1,Orysa4|Os01g46030.1,Orysa4|Os04g04914.1,Orysa4|Os04g23720.1,Orysa4|Os01g02430.1,Orysa4|Os05g25540.1,Orysa4|Os06g37690.1,Orysa4|Os09g38830.1,Orysa4|Os07g35004.1,Orysa4|Os08g40270.1,Orysa4|Os02g02120.1,Orysa4|Os01g67340.1,Orysa4|Os07g20610.1,Orysa4|Os06g49170.1,Orysa4|Os04g12080.1,Orysa4|Os07g35750.1,Orysa4|Os09g39640.1,Orysa4|Os06g49260.1,Orysa4|Os01g12290.1,Orysa4|Os11g02830.1,Orysa4|Os01g60700.1,Orysa4|Os11g17380.1,Orysa4|Os04g39930.1,Orysa4|Os06g50920.1,Orysa4|Os08g40270.1,Orysa4|Os03g44050.1,Orysa4|Os05g38770.1,Orysa4|Os08g01270.1,Orysa4|Os05g44030.1,Orysa4|Os05g34390.1,Orysa4|Os01g02750.1,Orysa4|Os02g05820.1,Orysa4|Os04g03579.1,Orysa4|Os04g49460.1,Orysa4|Os03g60810.1,Orysa4|Os01g04570.1,Orysa4|Os02g54590.1,Orysa4|Os04g51010.1,Orysa4|Os01g74200.1,Orysa4|Os07g04010.1,Orysa4|Os11g35240.1,Orysa4|Os05g38770.1,Orysa4|Os02g57080.1,Orysa4|Os10g01560.1,Orysa4|Os02g08530.1,Orysa4|Os11g46870.1,Orysa4|Os09g37230.1,Orysa4|Os11g34624.1,Orysa4|Os10g42110.1,Orysa4|Os06g41510.1,Orysa4|Os07g18230.1,Orysa4|Os07g31130.1,Orysa4|Os07g03880.1,Orysa4|Os07g34980.1,Orysa4|Os03g06410.1,Orysa4|Os06g06940.1,Orysa4|Os01g02580.1,Orysa4|Os05g41950.1,Orysa4|Os08g29040.1,Orysa4|Os06g14260.1,Orysa4|Os08g25430.1,Orysa4|Os10g38920.1,Orysa4|Os07g03790.1,Orysa4|Os12g44320.1,Orysa4|Os12g41270.1,Orysa4|Os01g66630.1,Orysa4|Os05g050190.1,Orysa4|Os09g16980.1,Orysa4|Os02g57420.1,Orysa4|Os04g28780.1,Orysa4|Os06g41960.1,Orysa4|Os07g03930.1,Orysa4|Os04g34410.1,Orysa4|Os07g43900.1,Orysa4|Os01g02610.1,Orysa4|Os10g02360.1,Orysa4|Os01g02830.1,Orysa4|Os07g36760.1,Orysa4|Os01g26390.1,Orysa4|Os01g02730.1,Orysa4|Os04g53994.1,Orysa4|Os06g05050.1,Orysa4|Os08g42580.1,Orysa4|Os01g41870.1,Orysa4|Os04g54002.1,Orysa4|Os07g35300.1,Orysa4|Os04g09770.1,Orysa4|Os11g28104.1,Orysa4|Os07g31210.1,Orysa4|Os01g04480.1,Orysa4|Os11g35120.1,Orysa4|Os07g35770.1,Orysa4|Os06g48980.1,Orysa4|Os10g18260.1,Orysa4|Os04g58750.1,Orysa4|Os04g45920.1,Orysa4|Os07g03900.1,Orysa4|Os10g12620.1,Orysa4|Os01g14926.1,Orysa4|Os05g07470.1,Orysa4|Os06g44430.1,Orysa4|Os04g34290.1,Orysa4|Os11g47810.1,Orysa4|Os04g21820.1,Orysa4|Os01g57480.1,Orysa4|Os07g06570.1,Orysa4|Os11g35220.1,Orysa4|Os03g37120.1,Orysa4|Os07g05370.1,Orysa4|Os08g08140.1,Orysa4|Os11g11490.1,Orysa4|Os03g15770.1,Orysa4|Os03g35600.1,Orysa4|Os09g38840.1,Orysa4|Os07g47270.1,Orysa4|Os10g35450.1,Orysa4|Os01g09860.1,Orysa4|Os11g10280.1,Orysa4|Os01g12420.1,Orysa4|Os09g24330.1,Orysa4|Os03g62430.1,Orysa4|Os05g25430.1,Orysa4|Os12g14699.1,Orysa4|Os06g46330.1,Orysa4|Os06g47790.1,Orysa4|Os04g54110.1,Orysa4|Os06g07070.1,Orysa4|Os01g63280.1,Orysa4|Os01g26300.1,Orysa4|Os01g44110.1,Orysa4|Os10g05170.1,Orysa4|Os04g06210.1,Orysa4|Os05g33080.1,Orysa4|Os11g03880.1,Orysa4|Os01g51290.1,Orysa4|Os10g30530.1,Orysa4|Os04g30030.1,Orysa4|Os07g03920.1,Orysa4|Os09g39930.1,Orysa4|Os11g44500.1,Orysa4|Os02g02040.1,Orysa4|Os04g23600.1,Orysa4|Os06g07230.1,Orysa4|Os08g10070.1,Orysa4|Os01g04490.1,Orysa4|Os08g39240.1,Orysa4|Os09g37880.1,Orysa4|Os04g23640.1,Orysa4|Os04g42480.1,Orysa4|Os06g47530.1,Orysa4|Os10g20160.1,Orysa4|Os02g02780.1,Orysa4|Os02g56400.1,Orysa4|Os01g14932.1,Orysa4|Os10g02250.1,Orysa4|Os03g61060.1,Orysa4|Os08g03070.1,Orysa4|Os01g39970.1,Orysa4|Os03g31070.1,Orysa4|Os02g58610.1,Orysa4|Os05g51400.1,Orysa4|Os07g38070.1,Orysa4|Os01g01110.1,Orysa4|Os01g45520.1,Orysa4|Os12g01740.1,Orysa4|Os01g02680.1,Orysa4|Os01g02560.1,Orysa4|Os09g39620.1,Orysa4|Os11g38850.1,Orysa4|Os06g47470.1,Orysa4|Os03g16740.1,Orysa4|Os01g56330.1,Orysa4|Os11g08950.1,Orysa4|Os10g06030.1,Orysa4|Os04g39180.1,Orysa4|Os01g54480.1,Orysa4|Os06g17490.1,Orysa4|Os06g37670.1,Orysa4|Os07g12850.1,Orysa4|Os10g04720.1,Orysa4|Os01g04450.1,Orysa4|Os07g03890.1,Orysa4|Os03g38710.1,Orysa4|Os09g33860.1,Orysa4|Os02g48210.1,Orysa4|Os03g29410.1,Orysa4|Os08g27780.1,Orysa4|Os11g47150.1,Orysa4|Os04g54080.1,Orysa4|Os02g12660.1,Orysa4|Os02g38080.1,Orysa4|Os04g51040.1,Orysa4|Os06g10160.1,Orysa4|Os02g53750.1,Orysa4|Os05g41370.1,Orysa4|Os01g26788.1,Orysa4|Os04g01874.1,Orysa4|Os01g48020.1,Orysa4|Os04g54180.1,Orysa4|Os05g01040.1,Orysa4|Os01g65940.1,Orysa4|Os11g35290.1,Orysa4|Os10g21090.1,Orysa4|Os01g02440.1,Orysa4|Os10g26520.1,Orysa4|Os11g44690.1,Orysa4|Os09g17110.1,Orysa4|Os01g23970.1,Orysa4|Os07g35540.1,Orysa4|Os08g39220.1,Orysa4|Os03g16260.1,Orysa4|Os01g47900.1,Orysa4|Os01g12400.1,Orysa4|Os05g25450.1,Orysa4|Os07g38820.1,Orysa4|Os09g14660.1,Orysa4|Os06g05830.1,Orysa4|Os04g01310.1,Orysa4|Os06g06920.1,Orysa4|Os07g15930.1,Orysa4|Os01g49614.1,Orysa4|Os01g06240.1,Orysa4|Os02g56330.1,Orysa4|Os05g12680.1,Orysa4|Os12g03650.1,Orysa4|Os12g06670.1,Orysa4|Os02g42620.1,Orysa4|Os02g57700.1,Orysa4|Os06g37750.1,Orysa4|Os02g56370.1,Orysa4|Os04g43730.1,Orysa4|Os10g38960.1,Orysa4|Os02g26160.1,Orysa4|Os12g40419.1,Orysa4|Os01g02390.1,Orysa4|Os08g03020.1,Orysa4|Os07g03950.1,Orysa4|Os11g45540.1,Orysa4|Os07g35700.1,Orysa4|Os07g35740.1,Orysa4|Os04g05580.1,Orysa4|Os12g41490.1,Orysa4|Os03g03280.1,Orysa4|Os01g40499.1,Orysa4|Os10g09550.1,Orysa4|Os09g03620.1,Orysa4|Os09g29520.1,Orysa4|Os10g09620.1,Orysa4|Os05g16670.1,Orysa4|Os01g241500.1,Orysa4|Os01g02040.1,Orysa4|Os03g03890.1,Orysa4|Os04g01320.1,Orysa4|Os04g32310.1,Orysa4|Os11g10640.1,Orysa4|Os01g36500.1,Orysa4|Os03g43760.1,Orysa4|Os12g42040.1,Orysa4|Os01g20900.1,Orysa4|Os04g12600.1,Orysa4|Os07g03850.1,Orysa4|Os10g01060.1,Orysa4|Os12g41510.1,Orysa4|Os08g24780.1,Orysa4|Os05g25390.1,Orysa4|Os01g10700.1,Orysa4|Os10g09700.1,Orysa4|Os06g45300.1,Orysa4|Os03g62180.1,Orysa4|Os04g24510.1,Orysa4|Os07g38800.1,Orysa4|Os02g48200.1,Orysa4|Os08g12750.1,Orysa4|Os04g30240.1,Orysa4|Os04g528

60.1,Orysa4|Os01g02310.1,Orysa4|Os11g39490.1,Orysa4|Os08g13870.1,Orysa4|Os08g39170.1,Orysa4|Os03g0116  
0.1,Orysa4|Os04g45170.1,Orysa4|Os01g57510.1,Orysa4|Os04g24300.1,Orysa4|Os06g10790.1,Orysa4|Os01g47840.  
1,Orysa4|Os03g13820.1,Orysa4|Os03g62700.1,Orysa4|Os09g18530.1,Orysa4|Os07g35340.1,Orysa4|Os01g02320.1,  
Orysa4|Os08g03240.1,Orysa4|Os11g01740.1,Orysa4|Os12g41260.1,Orysa4|Os01g20880.1,Orysa4|Os10g29620.1,O  
rysa4|Os07g08860.1,Orysa4|Os04g30060.1,Orysa4|Os10g20120.1,Orysa4|Os11g44550.1,Orysa4|Os01g26780.1,Ory  
sa4|Os01g02340.1,Orysa4|Os09g20740.1,Orysa4|Os01g59560.1,Orysa4|Os10g25550.1,Orysa4|Os01g12720.1,Ory  
sa4|Os07g03830.1,Orysa4|Os06g41560.1,Orysa4|Os08g03160.1,Orysa4|Os01g12430.1,Orysa4|Os02g06160.1,Ory  
sa4|Os08g03090.1,Orysa4|Os12g14610.1,Orysa4|Os02g19550.1,Orysa4|Os06g34960.1,Orysa4|Os02g35760.1,Orysa4|  
Os01g04580.1,Orysa4|Os03g08170.1,Orysa4|Os06g30130.1,Orysa4|Os01g38840.1,Orysa4|Os06g35850.1,Orysa4|O  
s03g30890.1,Orysa4|Os12g41710.1,Orysa4|Os01g02700.1,Orysa4|Os06g12590.1,Orysa4|Os08g40280.1,Orysa4|Os  
07g38810.1,Orysa4|Os05g07450.1,Orysa4|Os03g17550.1,Orysa4|Os09g29510.1,Orysa4|Os04g56130.1,Orysa4|Os0  
1g02410.1,Orysa4|Os01g02690.1,Orysa4|Os10g10130.1,Orysa4|Os09g29560.1,Orysa4|Os02g12670.1,Orysa4|Os08  
g04420.1,Orysa4|Os09g16540.1,Orysa4|Os04g24220.1,Orysa4|Os07g43570.1,Orysa4|Os07g35790.1,Orysa4|Os04g  
42740.1,Orysa4|Os06g38100.1,Orysa4|Os01g70410.1,Orysa4|Os04g58250.1,Orysa4|Os07g35260.1,Orysa4|Os07g3  
5810.1,Orysa4|Os10g05400.1,Orysa4|Os11g42440.1,Orysa4|Os04g12180.1,Orysa4|Os09g38850.1,Orysa4|Os06g47  
820.1,Orysa4|Os04g06244.1,Orysa4|Os04g54130.1,Orysa4|Os07g31190.1,Orysa4|Os04g05470.1,Orysa4|Os07g293  
30.1,Orysa4|Os01g02400.1,Orysa4|Os11g34610.1,Orysa4|Os09g27150.1,Orysa4|Os09g36320.1,Orysa4|Os11g4037  
0.1,Orysa4|Os07g03870.1,Orysa4|Os12g07800.1,Orysa4|Os08g02996.1,Orysa4|Os06g37620.1,Orysa4|Os02g57560.  
1,Orysa4|Os10g30600.1,Orysa4|Os09g29584.1,Orysa4|Os11g03840.1,Orysa4|Os04g24290.1,Orysa4|Os10g40100.1  
AT2G17170.1  
AT3G57640.1,AT3G57760.1,AT1G65190.1,AT1G65250.1  
AT3G12000.1  
AT1G53060.1,AT3G15356.1,AT3G16530.1,AT1G53070.1,AT5G03350.1,AT1G53080.1  
AT1G07460.1  
AT2G01780.1  
AT4G21366.1  
AT2G17160.1  
AT5G39370.1  
AT4G00340.1  
AT5G11360.1  
AT3G45390.1  
AT5G38260.1  
AT5G57680.1  
AT2G24620.1  
Orysa4|Os09g17010.1  
Orysa4|Os06g38160.1  
Orysa4|Os08g17320.1  
Orysa4|Os09g37790.1,Orysa4|Os09g37810.1  
Orysa4|Os07g14470.1,Orysa4|Os08g27810.1,Orysa4|Os12g42060.1,Orysa4|Os04g30340.1,Orysa4|Os10  
g01410.1,Orysa4|Os04g30280.1,Orysa4|Os02g56420.1,Orysa4|Os09g29600.1,Orysa4|Os01g26270.1,Orysa4|Os04g  
30360.1,Orysa4|Os10g17890.1,Orysa4|Os04g30110.1,Orysa4|Os04g29580.1  
Orysa4|Os07g15940.1,Orysa4|Os07g04110.1  
Orysa4|Os12g41570.1  
Orysa4|Os01g04470.1  
Orysa4|Os02g32680.1  
Orysa4|Os01g03690.1  
Orysa4|Os01g40540.1  
Orysa4|Os01g28290.1  
Orysa4|Os10g09690.1,Orysa4|Os10g09570.1  
Orysa4|Os11g40400.1  
Orysa4|Os09g02410.1  
Orysa4|Os01g65030.1,Orysa4|Os05g07080.1,Orysa4|Os04g34300.1  
Orysa4|Os01g73370.1  
Orysa4|Os10g26000.1  
Orysa4|Os04g55750.1,Orysa4|Os12g16540.1,Orysa4|Os08g29020.1,Orysa4|Os12g29430.1  
Orysa4|Os11g29510.1  
Orysa4|Os11g18980.1  
Orysa4|Os09g16670.1  
Orysa4|Os01g49580.1  
Orysa4|Os11g02860.1  
Orysa4|Os04g54020.1,Orysa4|Os01g57540.1,Orysa4|Os03g59950.1,Orysa4|Os11g10290.1  
Orysa4|Os04g07200.1  
Orysa4|Os08g24770.1  
Orysa4|Os01g73390.1  
Orysa4|Os03g21170.1  
Orysa4|Os07g26180.1  
Orysa4|Os06g35870.1  
Orysa4|Os04g30250.1,Orysa4|Os04g29950.1  
Orysa4|Os11g11780.1  
Orysa4|Os08g01280.1  
Orysa4|Os05g16360.1  
AT3G62260.2 Orysa4|Os05g04360.1,Orysa4|Os01g19130.1  
AT2G33700.1 Orysa4|Os10g39540.1  
AT1G18030.1 Orysa4|Os09g14540.1  
AT5G24940.1,AT4G31750.1,AT5G10740.1 Orysa4|Os06g48300.1,Orysa4|Os02g05630.1  
AT5G53140.1 Orysa4|Os05g50970.1  
AT1G07160.1,AT2G30020.1 Orysa4|Os03g18150.1  
AT2G25620.1 Orysa4|Os06g39600.1  
AT4G27800.1 Orysa4|Os01g37130.1  
AT1G48040.1,AT3G17250.1  
AT3G51470.1  
AT1G43900.1

AT1G67820.1  
AT3G27140.1,AT4G08260.1,AT2G40180.1  
Orysa4|Os04g56450.1  
Orysa4|Os06g33530.1,Orysa4|Os06g33549.1,Orysa4|Os02g15594.1  
Orysa4|Os01g43100.1  
Orysa4|Os11g13820.1  
Orysa4|Os06g08140.1,Orysa4|Os02g55560.1  
AT5G41350.1 Orysa4|Os11g18947.1,Orysa4|Os10g05230.1  
AT5G38895.1,AT3G02290.1,AT5G15790.1 Orysa4|Os01g70160.1  
AT4G00335.1  
AT4G23450.1  
Orysa4|Os03g40170.1  
Orysa4|Os11g41140.1  
AT5G41315.1,AT1G63650.1 Orysa4|Os04g47080.1,Orysa4|Os11g15210.1,Orysa4|Os04g47040.1  
AT4G09820.1 Orysa4|Os07g11020.1  
AT4G00480.1  
Orysa4|Os01g39480.1,Orysa4|Os01g39580.1  
Orysa4|Os01g39560.1  
Orysa4|Os04g47059.1  
AT5G48170.1 Orysa4|Os03g10040.1  
AT2G13100.1 Orysa4|Os06g08170.1  
AT3G47420.1 Orysa4|Os04g46880.1  
Orysa4|Os08g06010.1  
AT5G50930.1 Orysa4|Os04g32600.1  
AT5G52180.1 Orysa4|Os06g03820.1  
AT4G22600.1 Orysa4|Os02g44250.1  
AT2G06510.1 Orysa4|Os02g53680.1  
AT5G08020.1,AT5G61000.1 Orysa4|Os03g11540.1  
AT4G19130.1,AT5G45400.1 Orysa4|Os05g02040.1  
Orysa4|Os05g02030.1  
AT4G15140.1 Orysa4|Os04g42540.1  
AT1G02960.2 Orysa4|Os02g48116.1  
AT1G57540.1 Orysa4|Os01g14790.1  
AT1G04710.1,AT2G33150.1 Orysa4|Os02g57260.1  
AT5G48880.3  
Orysa4|Os10g31950.1  
AT4G33100.1 Orysa4|Os09g19750.1  
AT2G42900.1 Orysa4|Os05g50500.1  
AT3G25710.1,AT1G68810.1 Orysa4|Os03g15440.1  
AT3G56770.1  
Orysa4|Os01g06640.1,Orysa4|Os01g11910.1,Orysa4|Os05g07120.1  
Orysa4|Os08g37290.1,Orysa4|Os09g28900.1,Orysa4|Os08g33590.1,Orysa4|Os09g24490.1  
AT3G13677.1 Orysa4|Os03g38500.1  
AT1G67785.1 Orysa4|Os01g68030.1  
AT1G73730.1 Orysa4|Os09g31400.1,Orysa4|Os08g39830.1  
AT2G27050.1,AT3G20770.1 Orysa4|Os03g20790.1,Orysa4|Os03g20780.1,Orysa4|Os07g48630.1  
AT5G10120.1,AT5G65100.1  
AT5G21120.1  
Orysa4|Os07g17160.1  
AT5G07950.1 Orysa4|Os03g11450.1  
AT1G30510.2,AT4G05390.1 Orysa4|Os07g05400.1,Orysa4|Os03g57120.1  
AT5G66190.1,AT1G20020.1 Orysa4|Os06g01850.1,Orysa4|Os02g01340.1  
AT2G29180.1 Orysa4|Os03g16470.1  
AT4G00695.1,AT1G80245.1 Orysa4|Os06g51400.1  
AT1G23380.1,AT1G70510.1 Orysa4|Os01g19694.1,Orysa4|Os05g03884.1  
AT4G08150.1 Orysa4|Os03g51690.1  
Orysa4|Os03g51710.1  
Orysa4|Os07g03770.1  
Orysa4|Os03g47042.1,Orysa4|Os03g56110.1,Orysa4|Os03g47022.1  
Orysa4|Os03g56140.1  
AT3G17030.1 Orysa4|Os03g61700.1  
AT5G15802.1 Orysa4|Os03g30092.1  
AT3G07150.1 Orysa4|Os01g68960.1  
AT5G63200.1 Orysa4|Os01g67920.1  
AT5G19000.1,AT3G06190.1 Orysa4|Os07g46160.1  
AT3G03740.1 Orysa4|Os03g57854.1,Orysa4|Os07g07270.1  
AT5G21010.1,AT3G43700.1  
Orysa4|Os10g29120.1,Orysa4|Os10g29180.1,Orysa4|Os10g29310.1,Orysa4|Os10g29320.1,Orysa4|Os11g40680.1,Orysa4|Os10g29290.1,Orysa4|Os10g29230.1,Orysa4|Os10g29390.1,Orysa4|Os10g29100.1,Orysa4|Os10g29220.1,Orysa4|Os10g29050.1,Orysa4|Os10g28860.1,Orysa4|Os10g29410.1,Orysa4|Os10g29260.1,Orysa4|Os10g29330.1,Orysa4|Os10g29340.1,Orysa4|Os10g28770.1,Orysa4|Os10g28810.1,Orysa4|Os10g28760.1  
Orysa4|Os08g41170.1,Orysa4|Os08g41180.1,Orysa4|Os03g48120.1,Orysa4|Os08g41120.1,Orysa4|Os08g40490.1,Orysa4|Os08g41150.1,Orysa4|Os08g41190.1,Orysa4|Os08g41240.1,Orysa4|Os08g41220.1,Orysa4|Os09g06890.1  
Orysa4|Os10g29810.1,Orysa4|Os10g29740.1,Orysa4|Os02g20720.1,Orysa4|Os02g20690.1,Orysa4|Os10g29110.1,Orysa4|Os10g29020.1,Orysa4|Os02g20590.1,Orysa4|Os10g29850.1,Orysa4|Os10g29150.1,Orysa4|Os04g53410.1,Orysa4|Os04g35370.1,Orysa4|Os08g13030.1,Orysa4|Os04g35310.1,Orysa4|Os10g29950.1,Orysa4|Os10g29920.1,Orysa4|Os10g30040.1  
Orysa4|Os10g28130.1,Orysa4|Os11g45560.1,Orysa4|Os04g35340.1,Orysa4|Os08g03510.1,Orysa4|Os11g40220.1,Orysa4|Os11g41310.1,Orysa4|Os10g28870.1,Orysa4|Os10g28970.1,Orysa4|Os10g28780.1,Orysa4|Os11g24550.1,Orysa4|Os11g41350.1,Orysa4|Os08g03530.1  
Orysa4|Os10g29820.1,Orysa4|Os10g28980.1,Orysa4|Os02g20600.1,Orysa4|Os06g45730.1,Orysa4|Os06

g14060.1 Orysa4|Os09g16870.1,Orysa4|Os09g16850.1  
Orysa4|Os08g13020.1,Orysa4|Os08g13180.1,Orysa4|Os08g13070.1,Orysa4|Os08g13090.1,Orysa4|Os08  
g13060.1,Orysa4|Os08g03500.1  
Orysa4|Os08g09830.1,Orysa4|Os06g45720.1  
Orysa4|Os08g03490.1,Orysa4|Os08g12960.1  
Orysa4|Os10g29360.1  
Orysa4|Os06g45770.1,Orysa4|Os11g41290.1  
Orysa4|Os08g03480.1  
Orysa4|Os04g53430.1,Orysa4|Os04g53400.1,Orysa4|Os04g53390.1  
Orysa4|Os08g41200.1  
Orysa4|Os05g44530.1  
Orysa4|Os10g29370.1  
Orysa4|Os08g40460.1  
Orysa4|Os08g03540.1  
Orysa4|Os10g28840.1  
Orysa4|Os08g25240.1  
Orysa4|Os08g13130.1  
Orysa4|Os05g44540.1  
Orysa4|Os08g13250.1  
Orysa4|Os11g40480.1  
Orysa4|Os07g20130.1  
AT1G61600.1 Orysa4|Os08g31890.1,Orysa4|Os08g31920.1,Orysa4|Os08g31880.1,Orysa4|Os08g31910.1  
AT1G13500.1,AT1G13480.1,AT1G13470.1,AT1G13510.1,AT1G13540.1,AT1G13550.1,AT1G13490.1,AT1G13530.1,A  
T1G13520.1  
AT5G42655.1 Orysa4|Os03g52920.1  
AT5G18540.1 Orysa4|Os07g47340.1  
AT3G20420.1 Orysa4|Os05g18850.1  
AT1G01040.1 Orysa4|Os03g02970.1  
AT3G43920.1 Orysa4|Os01g68120.1  
AT5G45150.1  
Orysa4|Os01g37050.1  
Orysa4|Os06g25250.1  
AT5G06590.1 Orysa4|Os12g42840.1  
AT1G02205.2 Orysa4|Os02g40784.1,Orysa4|Os10g33250.1  
AT5G57800.1 Orysa4|Os09g25850.1,Orysa4|Os02g08230.1  
AT1G02190.1  
AT2G37700.1  
Orysa4|Os02g29600.1  
Orysa4|Os02g56920.1  
Orysa4|Os04g43280.1  
AT3G45900.1 Orysa4|Os03g63660.1  
AT4G12540.1 Orysa4|Os05g45580.1  
ATMG00210.1,AT2G07725.1 Orysa4|Os09g08890.1  
AT3G57670.1 Orysa4|Os06g40960.1  
AT1G13290.1 Orysa4|Os09g13680.1  
AT1G34790.1,AT1G51220.1,AT3G20880.1  
Orysa4|Os09g31140.1,Orysa4|Os08g39390.1  
Orysa4|Os09g10980.1  
Orysa4|Os09g31150.1  
Orysa4|Os03g30150.1  
AT5G56880.1 Orysa4|Os01g09870.1,Orysa4|Os05g10990.1  
AT1G32370.2 Orysa4|Os02g17850.1  
AT1G31175.1 Orysa4|Os07g38010.1  
AT4G13030.1 Orysa4|Os05g19280.1  
AT2G36390.1,AT5G03650.1 Orysa4|Os02g32660.1  
AT3G20440.1 Orysa4|Os06g26234.1  
Orysa4|Os06g51084.1  
Orysa4|Os04g33460.1  
AT1G34640.1 Orysa4|Os07g43010.1  
AT1G03310.1 Orysa4|Os05g32710.1  
AT2G39930.1 Orysa4|Os08g40930.1  
AT4G09020.1  
AT1G36380.1 Orysa4|Os02g34730.1  
AT3G62920.1 Orysa4|Os05g30810.1  
AT3G25570.1,AT5G15950.1,AT3G02470.1 Orysa4|Os04g42090.1,Orysa4|Os02g39790.1,Orysa4|Os09g25620.1  
AT5G18930.1 Orysa4|Os05g04990.1  
Orysa4|Os09g24600.1  
AT1G01840.1 Orysa4|Os04g44100.1  
AT2G02480.1,AT1G14460.1 Orysa4|Os12g10670.1,Orysa4|Os11g13990.1  
AT4G18820.1,AT5G45720.1 Orysa4|Os05g45340.1,Orysa4|Os01g53070.1  
AT4G24790.1 Orysa4|Os08g02670.1  
Orysa4|Os12g19180.1  
AT4G19400.1 Orysa4|Os05g15180.1  
AT4G24370.1 Orysa4|Os08g05540.1  
AT3G59840.1 Orysa4|Os05g42110.1  
AT1G24440.1,AT1G13195.1 Orysa4|Os01g67850.1,Orysa4|Os07g17400.1  
AT5G58787.1,AT3G47160.1 Orysa4|Os07g46700.1,Orysa4|Os10g35670.1  
AT5G01520.1  
Orysa4|Os10g30850.1  
AT2G04235.1 Orysa4|Os06g40590.1  
AT4G32680.1 Orysa4|Os01g64370.1,Orysa4|Os02g44132.1



AT3G07525.2 Orysa4|Os04g41990.1,Orysa4|Os12g32210.1  
AT5G03430.1 Orysa4|Os01g15490.1  
AT1G77760.1,AT1G37130.1 Orysa4|Os08g36500.1,Orysa4|Os02g53130.1,Orysa4|Os08g36480.1  
Orysa4|Os10g17780.1  
AT5G45310.1 Orysa4|Os01g73110.1  
AT5G57685.1,AT4G25760.1 Orysa4|Os06g44420.1,Orysa4|Os08g34700.1  
AT5G24920.1,AT2G24762.1,AT4G31730.1  
Orysa4|Os08g15070.1  
AT2G23670.1 Orysa4|Os02g57020.1  
AT3G60310.1 Orysa4|Os06g05640.1  
AT4G01790.1 Orysa4|Os07g44230.1  
AT1G12790.1 Orysa4|Os05g51060.1  
AT3G52230.1 Orysa4|Os01g73780.1  
AT4G34880.1  
Orysa4|Os04g10460.1,Orysa4|Os10g06710.1,Orysa4|Os04g10410.1,Orysa4|Os04g10530.1,Orysa4|Os06  
g16030.1  
Orysa4|Os04g10640.1  
Orysa4|Os04g10630.1  
Orysa4|Os04g10569.1  
Orysa4|Os01g02500.1  
AT3G10020.1 Orysa4|Os12g05210.1,Orysa4|Os11g05170.1  
AT3G60480.1 Orysa4|Os04g46380.1  
AT2G41610.1 Orysa4|Os03g14880.1  
AT2G33855.1 Orysa4|Os04g39950.1  
AT1G63940.2 Orysa4|Os08g05570.1  
AT3G52880.1 Orysa4|Os09g39380.1,Orysa4|Os08g44340.1  
AT5G03630.1  
AT3G09940.1  
AT1G01690.1 Orysa4|Os03g01590.1  
AT2G44120.2,AT2G01250.1,AT3G13580.1 Orysa4|Os04g51630.1,Orysa4|Os08g13690.1  
AT1G80750.1 Orysa4|Os08g42920.1  
Orysa4|Os11g19260.1  
AT4G27510.1 Orysa4|Os02g26300.1  
AT5G41560.1 Orysa4|Os03g03420.1  
AT1G10180.1 Orysa4|Os07g38060.1  
AT5G49830.1 Orysa4|Os07g10110.1  
AT1G10385.1  
Orysa4|Os08g45200.1  
AT5G54855.1 Orysa4|Os02g21280.1  
AT1G05950.1 Orysa4|Os09g33940.1  
AT5G19970.1 Orysa4|Os01g45900.1  
AT4G00525.1 Orysa4|Os04g47130.1  
AT1G72060.1 Orysa4|Os03g52390.1  
AT1G77350.1 Orysa4|Os05g40780.1  
AT2G25625.1 Orysa4|Os05g49940.1  
AT5G15200.1,AT5G39850.1 Orysa4|Os03g05980.1,Orysa4|Os11g38949.1  
Orysa4|Os03g26229.1  
AT5G49320.1 Orysa4|Os01g14960.1  
AT1G28560.1 Orysa4|Os01g68440.1  
ATCG00120.1 Orysa4|Os10g38270.1,Orysa4|Os04g16740.1,Orysa4|Os10g21240.1  
AT2G07698.1,ATMG01190.1 Orysa4|Os09g08910.1  
Orysa4|Os03g48471.1,Orysa4|Os09g08880.1  
Orysa4|Os12g23630.1  
Orysa4|Os01g08350.1  
AT3G12345.1 Orysa4|Os06g28950.1  
AT2G37020.1 Orysa4|Os10g30640.1  
AT3G27520.1 Orysa4|Os02g38180.1  
AT1G21500.1 Orysa4|Os09g34140.1  
AT1G75630.1,AT4G34720.1,AT1G19910.1,AT2G16510.1,AT4G38920.1  
Orysa4|Os11g06890.1,Orysa4|Os02g34510.1,Orysa4|Os05g01560.1  
Orysa4|Os01g73130.1  
AT3G49400.1 Orysa4|Os01g50690.1  
AT5G42290.1 Orysa4|Os03g04080.1  
AT1G68080.1 Orysa4|Os03g13550.1  
AT3G05320.1 Orysa4|Os02g07200.1  
AT3G19260.1 Orysa4|Os03g15750.1  
AT1G13580.2,AT3G25540.1 Orysa4|Os02g37080.1,Orysa4|Os02g49590.1  
Orysa4|Os09g20630.1  
AT3G60850.1 Orysa4|Os03g14290.1  
AT1G01050.1,AT2G46860.1 Orysa4|Os05g36260.1,Orysa4|Os04g59040.1  
AT4G01480.1  
Orysa4|Os01g64670.1  
Orysa4|Os01g21900.1  
Orysa4|Os10g26600.1  
Orysa4|Os02g47600.1  
AT3G29300.1 Orysa4|Os04g55490.1  
AT4G35905.1 Orysa4|Os10g30300.1  
AT4G40045.1 Orysa4|Os12g10510.1  
AT3G56820.1 Orysa4|Os01g59520.1  
AT5G40870.1,AT3G27190.1 Orysa4|Os08g41790.1,Orysa4|Os09g32820.1  
AT4G26510.1,AT1G55810.1 Orysa4|Os11g16370.1,Orysa4|Os02g17320.1  
AT3G27440.1

AT3G23570.1,AT3G23600.1 Orysa4|Os05g33100.1,Orysa4|Os05g33110.1  
Orysa4|Os08g14000.1,Orysa4|Os05g33190.1,Orysa4|Os05g33200.1,Orysa4|Os08g14109.1,Orysa4|Os11  
g17504.1,Orysa4|Os08g14020.1,Orysa4|Os11g17540.1  
Orysa4|Os08g14060.1,Orysa4|Os08g14090.1  
Orysa4|Os05g33090.1  
Orysa4|Os08g14030.1  
AT5G04560.1 Orysa4|Os01g11900.1  
AT4G34060.1  
AT3G10010.1,AT2G36490.1  
AT3G12580.1 Orysa4|Os05g38530.1,Orysa4|Os11g47760.1,Orysa4|Os01g62290.1  
AT1G11660.1 Orysa4|Os06g46600.1  
AT4G16660.1 Orysa4|Os02g48110.1  
AT2G32120.1 Orysa4|Os03g11910.1  
AT5G28540.1,AT5G42020.1 Orysa4|Os02g02410.1  
AT5G09590.1 Orysa4|Os02g53420.1,Orysa4|Os03g02260.1  
AT5G49910.1,AT4G24280.1 Orysa4|Os12g14070.1,Orysa4|Os05g23740.1  
AT1G56410.1,AT5G02500.1,AT5G02490.1  
AT3G09440.1  
AT1G16030.1  
AT1G09080.1  
AT5G09600.1  
AT4G37910.1  
Orysa4|Os11g08470.1,Orysa4|Os11g08460.1,Orysa4|Os03g16920.1,Orysa4|Os11g08440.1  
Orysa4|Os01g49430.1  
Orysa4|Os11g47370.1  
Orysa4|Os08g09770.1,Orysa4|Os05g35400.1,Orysa4|Os05g30480.1  
Orysa4|Os06g10990.1  
Orysa4|Os03g50250.1  
Orysa4|Os09g31486.1  
AT1G56190.1,AT3G12780.1 Orysa4|Os05g41640.1  
AT1G79550.1 Orysa4|Os06g45710.1,Orysa4|Os02g07260.1  
Orysa4|Os10g30550.1  
Orysa4|Os01g58610.1  
AT1G32400.1 Orysa4|Os08g18044.1  
AT2G20740.1 Orysa4|Os04g58330.1  
AT4G28770.1,AT2G20230.1 Orysa4|Os06g51480.1  
Orysa4|Os08g06250.1  
AT3G17790.1,AT1G14700.1,AT1G25230.1,AT2G01890.1 Orysa4|Os03g13540.1,Orysa4|Os10g02750.1  
AT2G01880.1  
Orysa4|Os11g34710.1  
Orysa4|Os11g34720.1  
AT3G14050.1,AT1G54130.1 Orysa4|Os08g35620.1,Orysa4|Os09g27050.1  
Orysa4|Os02g47120.1  
Orysa4|Os07g42160.1  
AT3G61690.1 Orysa4|Os03g11240.1  
AT3G51620.2 Orysa4|Os11g02320.1,Orysa4|Os12g02260.1  
AT3G56320.1,AT2G40520.1  
Orysa4|Os07g48170.1,Orysa4|Os12g18530.1,Orysa4|Os03g21850.1  
AT1G15670.1,AT1G80440.1 Orysa4|Os06g39370.1  
AT2G44130.1,AT3G59940.1 Orysa4|Os02g35530.1,Orysa4|Os11g14140.1  
AT1G02110.1,AT3G60320.1 Orysa4|Os10g41310.1  
AT5G25590.1 Orysa4|Os05g32760.1  
AT1G52320.1  
Orysa4|Os02g43770.1  
Orysa4|Os07g02740.1  
Orysa4|Os07g11070.1  
Orysa4|Os01g31580.1  
AT1G17290.1,AT1G72330.1 Orysa4|Os07g42600.1  
AT1G70580.1,AT1G23310.1 Orysa4|Os07g01760.1  
Orysa4|Os10g25130.1  
Orysa4|Os09g26380.1  
Orysa4|Os10g25140.1  
Orysa4|Os03g08530.1  
AT2G31060.2 Orysa4|Os01g54910.1  
AT5G13650.2 Orysa4|Os02g18450.1  
AT3G47800.1,AT5G15140.1  
Orysa4|Os03g26430.1,Orysa4|Os02g36600.1,Orysa4|Os04g38540.1,Orysa4|Os04g38530.1  
AT3G17940.1 Orysa4|Os10g06720.1  
AT3G01260.1  
Orysa4|Os09g02140.1  
AT4G15560.1 Orysa4|Os05g33840.1  
AT5G11380.1 Orysa4|Os06g05100.1  
AT3G21500.2  
Orysa4|Os07g09190.1  
AT5G57560.1,AT4G25810.1,AT1G65310.1,AT5G57550.1,AT4G30280.1,AT4G30270.1,AT5G48070.1,AT4G30290.1  
Orysa4|Os06g48160.1,Orysa4|Os06g48200.1  
AT4G13090.1,AT3G25050.1,AT4G13080.1,AT2G06850.1 Orysa4|Os06g13040.1  
AT5G13870.1 Orysa4|Os11g33270.1  
AT1G14720.1,AT2G01850.1 Orysa4|Os03g13570.1,Orysa4|Os10g02770.1  
AT1G32170.1,AT4G18990.1 Orysa4|Os02g03550.1  
AT3G23730.1,AT4G14130.1  
AT2G18800.1

AT4G28850.1  
AT5G57540.1,AT4G25820.1,AT5G57530.1  
AT1G11545.1  
AT2G14620.1,AT5G65730.1,AT4G37800.1  
AT4G03210.1  
AT3G48580.1  
Orysa4|Os08g14200.1,Orysa4|Os04g51450.1,Orysa4|Os08g14210.1,Orysa4|Os04g51460.1  
Orysa4|Os06g48180.1  
Orysa4|Os06g48170.1,Orysa4|Os04g51520.1  
Orysa4|Os08g13920.1  
Orysa4|Os03g02610.1,Orysa4|Os09g23220.1  
Orysa4|Os03g63760.1  
Orysa4|Os10g42670.1  
AT2G46800.1 Orysa4|Os05g03780.1  
AT3G61940.1,AT3G58810.1  
AT2G29410.1  
AT5G10090.1,AT5G65160.1 Orysa4|Os02g51730.1  
AT1G78120.1  
AT2G39730.1 Orysa4|Os11g47970.1  
AT1G73110.1 Orysa4|Os04g56320.1  
Orysa4|Os11g47980.1  
AT5G05730.1 Orysa4|Os03g61120.1  
AT2G28880.1 Orysa4|Os06g48620.1  
AT2G29690.1  
AT1G27730.1,AT3G19580.1,AT5G67450.1,AT5G04340.1 Orysa4|Os12g39400.1,Orysa4|Os03g41390.1  
AT3G49930.1  
AT5G43170.1  
Orysa4|Os03g32230.1,Orysa4|Os07g40080.1,Orysa4|Os03g32220.1  
Orysa4|Os07g39970.1  
AT5G61510.1 Orysa4|Os03g01190.1,Orysa4|Os10g41170.1  
AT4G10570.1,AT4G10590.1,AT1G32850.1 Orysa4|Os10g07270.1  
AT5G22030.1 Orysa4|Os07g06610.1  
AT2G40930.1  
Orysa4|Os12g42600.1  
Orysa4|Os11g44540.1,Orysa4|Os01g48600.1  
AT1G10040.1 Orysa4|Os03g51670.1  
AT1G65290.1 Orysa4|Os03g22950.1  
AT2G44620.1 Orysa4|Os07g12150.1  
Orysa4|Os03g23000.1  
Orysa4|Os05g31290.1  
AT4G02120.1 Orysa4|Os12g36950.1  
AT3G12670.1 Orysa4|Os01g43020.1,Orysa4|Os05g49770.1  
AT1G30820.1  
AT4G20320.1  
AT2G34890.1  
Orysa4|Os01g46570.1  
AT5G57360.1 Orysa4|Os06g47890.1,Orysa4|Os02g05700.1  
AT1G68050.1 Orysa4|Os11g34460.1  
AT2G18915.2  
AT5G23410.1  
AT1G80120.1,AT3G15810.1 Orysa4|Os01g56450.1,Orysa4|Os05g43460.1  
AT2G38640.1 Orysa4|Os05g24650.1,Orysa4|Os12g02720.1,Orysa4|Os11g02750.1,Orysa4|Os05g40630.1  
AT5G41590.1  
Orysa4|Os11g02800.1,Orysa4|Os12g02760.1  
AT1G59710.1 Orysa4|Os07g09384.1,Orysa4|Os03g58740.1  
AT3G28630.1,AT3G01311.1  
AT1G69890.1  
AT1G69900.1,AT1G27100.1  
Orysa4|Os05g43050.1  
AT5G51570.1 Orysa4|Os06g04460.1  
AT5G62740.1 Orysa4|Os05g51420.1  
Orysa4|Os08g30790.1  
Orysa4|Os01g40580.1  
Orysa4|Os01g40560.1  
Orysa4|Os10g32700.1  
AT5G62580.1 Orysa4|Os06g13600.1  
AT1G50890.1,AT4G27060.1 Orysa4|Os07g33630.1  
AT2G07170.1 Orysa4|Os09g38710.1  
AT1G59850.1,AT1G27210.1  
AT5G42790.1,AT1G47250.1 Orysa4|Os02g04100.1  
AT5G66140.1,AT3G51260.1 Orysa4|Os08g43540.1  
AT4G02650.1,AT1G03050.1 Orysa4|Os05g35160.1  
AT4G32285.1,AT2G25430.1 Orysa4|Os03g16800.1  
AT1G05020.1  
Orysa4|Os01g65860.1  
Orysa4|Os09g29680.1  
Orysa4|Os05g02140.1  
AT1G69230.1 Orysa4|Os11g41150.1,Orysa4|Os12g31780.1  
AT5G15600.1,AT3G02180.1  
Orysa4|Os03g30430.1  
AT1G17980.1 Orysa4|Os06g21470.1  
AT4G32850.8,AT2G25850.2 Orysa4|Os02g13400.1,Orysa4|Os06g36360.1

AT3G06560.1 Orysa4|Os07g48890.1,Orysa4|Os03g19920.1  
Orysa4|Os01g50730.1,Orysa4|Os04g49870.1  
AT5G19590.1 Orysa4|Os01g41220.1  
AT1G02816.1,AT4G02370.1 Orysa4|Os05g29920.1,Orysa4|Os05g29900.1  
AT1G02813.1,AT4G02360.1  
Orysa4|Os05g34810.1,Orysa4|Os12g09620.1  
AT1G48090.1 Orysa4|Os02g27110.1  
AT4G17130.1  
AT4G17140.1  
Orysa4|Os02g27130.1  
AT4G39660.1 Orysa4|Os03g07570.1  
AT3G08860.1 Orysa4|Os05g39770.1,Orysa4|Os03g21960.1  
AT2G38400.1  
AT1G70330.1 Orysa4|Os08g10450.1  
AT4G05110.1,AT4G05130.1,AT4G05140.1,AT4G05120.1 Orysa4|Os07g37100.1,Orysa4|Os07g37110.1  
AT1G61630.1  
AT3G09990.1  
Orysa4|Os07g37130.1  
AT1G75080.1,AT1G19350.3 Orysa4|Os07g39220.1  
AT1G78700.1 Orysa4|Os06g35900.1,Orysa4|Os01g10610.1  
AT3G50750.1  
AT4G36780.1  
AT4G18890.1  
Orysa4|Os02g13900.1  
AT3G02360.1 Orysa4|Os06g02144.1  
AT5G41670.1,AT1G64190.1  
AT5G35570.1 Orysa4|Os09g27080.1  
AT1G35510.1 Orysa4|Os12g07540.1  
AT2G37980.1,AT3G54100.1,AT5G01100.1 Orysa4|Os05g37880.1,Orysa4|Os01g63230.1  
AT1G14020.1,AT2G03280.2 Orysa4|Os03g07310.1  
AT3G02250.1,AT5G15740.1 Orysa4|Os02g49460.1,Orysa4|Os09g29940.1,Orysa4|Os06g17390.1  
AT1G11990.1,AT1G62330.1 Orysa4|Os06g13220.1  
AT1G29200.1 Orysa4|Os06g35410.1  
AT4G24530.1 Orysa4|Os09g24570.1  
AT1G14970.1,AT2G01480.1 Orysa4|Os05g38490.1  
AT5G64600.1 Orysa4|Os12g08820.1  
AT4G16650.1 Orysa4|Os04g46570.1  
AT1G20550.1,AT1G76270.1 Orysa4|Os04g47520.1  
AT1G04910.1 Orysa4|Os11g29120.1,Orysa4|Os12g23760.1  
AT1G22460.1 Orysa4|Os06g11600.1  
AT3G26370.1 Orysa4|Os02g06400.1  
AT1G38065.1,AT1G38131.1  
AT5G65470.1  
AT5G63390.1  
AT3G07900.1,AT2G44500.1  
AT4G38390.1  
Orysa4|Os03g21090.1,Orysa4|Os01g07410.1  
Orysa4|Os02g04590.1  
Orysa4|Os01g62390.1  
Orysa4|Os09g37590.1  
Orysa4|Os06g47290.1  
AT5G24810.1 Orysa4|Os06g48770.1  
ATCG00480.1 Orysa4|Os10g21270.1  
AT5G08670.1,AT5G08680.1,AT5G08690.1 Orysa4|Os01g49190.1,Orysa4|Os05g47980.1  
Orysa4|Os12g10570.1,Orysa4|Os06g39740.1  
Orysa4|Os03g55874.1  
AT1G54180.1,AT5G20540.1,AT3G14000.1 Orysa4|Os09g27220.1,Orysa4|Os08g36020.1  
AT1G31880.1  
Orysa4|Os04g39940.1  
Orysa4|Os09g27230.1  
AT3G58700.1,AT5G45775.2,AT2G42740.1,AT4G18730.1  
Orysa4|Os06g35730.1,Orysa4|Os05g11710.1,Orysa4|Os02g14059.1  
AT1G01225.1,AT4G00905.1 Orysa4|Os08g43350.1,Orysa4|Os09g35810.1  
AT5G16360.1,AT3G02700.1 Orysa4|Os05g24560.1  
AT5G06370.1  
AT5G16330.1  
Orysa4|Os11g41500.1  
AT5G24600.1 Orysa4|Os02g19060.1,Orysa4|Os08g05770.1  
AT5G46060.1 Orysa4|Os08g28970.1,Orysa4|Os09g15780.1  
AT3G18215.1  
Orysa4|Os01g49030.1  
AT1G43130.1 Orysa4|Os05g36110.1,Orysa4|Os01g64780.1  
AT2G20120.1,AT2G20130.1 Orysa4|Os02g16880.1,Orysa4|Os05g45280.1  
AT2G18460.2  
AT1G34340.1 Orysa4|Os01g65070.1,Orysa4|Os05g35730.1  
AT3G50790.1 Orysa4|Os02g43340.1  
AT5G49950.1  
AT4G24220.1 Orysa4|Os03g32170.1,Orysa4|Os07g41050.1  
AT5G58750.1  
Orysa4|Os03g30870.1  
AT1G73880.1,AT1G51210.1  
Orysa4|Os06g17020.1,Orysa4|Os06g17260.1,Orysa4|Os08g38110.1,Orysa4|Os06g17120.1,Orysa4|Os04

g55680.1,Orysa4|Os06g17250.1  
AT2G29710.1,AT1G07250.1,AT4G15280.1,AT2G29730.1,AT3G21750.1,AT1G07240.1,AT1G07260.1,AT2G29740.1,A  
T3G21780.1,AT3G21800.1,AT3G21790.1,AT3G21760.1,AT2G29750.1  
Orysa4|Os07g32620.1,Orysa4|Os07g32010.1,Orysa4|Os07g31960.1,Orysa4|Os07g37690.1,Orysa4|Os01  
g50200.1,Orysa4|Os07g32060.1,Orysa4|Os07g32630.1,Orysa4|Os07g32020.1,Orysa4|Os03g62480.1,Orysa4|Os05g  
45100.1,Orysa4|Os05g45200.1  
AT5G05870.1,AT3G11340.1,AT3G55700.1,AT5G05860.1,AT5G05890.1,AT5G05900.1,AT5G05880.1,AT3G55710.1  
Orysa4|Os07g13634.1,Orysa4|Os07g13810.1,Orysa4|Os07g13800.1,Orysa4|Os03g60960.1,Orysa4|Os11  
g25730.1,Orysa4|Os11g25454.1,Orysa4|Os07g13660.1,Orysa4|Os07g13770.1  
AT2G36780.1,AT2G15480.1,AT4G34135.1,AT2G36790.1,AT4G34138.1,AT4G34131.1,AT2G15490.1,AT2G36800.1,A  
T2G36750.1,AT2G36770.1  
Orysa4|Os01g45140.1,Orysa4|Os01g41430.1,Orysa4|Os01g41450.1,Orysa4|Os01g45110.1  
AT2G43820.1,AT1G05680.1,AT2G31790.1,AT2G43840.1  
Orysa4|Os09g34250.1,Orysa4|Os04g12980.1,Orysa4|Os09g34230.1,Orysa4|Os04g12970.1,Orysa4|Os09  
g34270.1,Orysa4|Os04g12720.1,Orysa4|Os04g12960.1,Orysa4|Os09g34214.1  
AT1G01420.1,AT1G01390.1,AT4G01070.1 Orysa4|Os11g38650.1  
AT2G36970.1,AT2G28080.1 Orysa4|Os10g30560.1  
AT5G49690.1,AT5G65550.1,AT2G22590.1 Orysa4|Os01g64540.1  
AT2G30140.1,AT2G30150.1 Orysa4|Os01g59100.1,Orysa4|Os01g59110.1,Orysa4|Os05g41400.1  
AT4G15550.1,AT1G05530.1,AT4G14090.1,AT1G05560.1  
Orysa4|Os01g08440.1,Orysa4|Os02g10880.1,Orysa4|Os05g08750.1,Orysa4|Os11g25990.1,Orysa4|Os06  
g39330.1,Orysa4|Os06g39270.1  
AT1G22340.1,AT1G22370.2,AT1G78270.1,AT1G22360.1,AT1G22400.1,AT1G22380.1  
Orysa4|Os02g51900.1,Orysa4|Os02g51910.1  
AT3G02100.1  
Orysa4|Os03g55030.1,Orysa4|Os10g18510.1,Orysa4|Os10g17489.1,Orysa4|Os03g55020.1,Orysa4|Os03  
g55010.1,Orysa4|Os03g55040.1,Orysa4|Os03g55050.1  
AT3G22250.1 Orysa4|Os04g44354.1,Orysa4|Os02g42280.1  
AT4G15500.1,AT4G15490.1,AT4G15480.1,AT3G21560.1  
Orysa4|Os02g09510.1,Orysa4|Os01g49240.1,Orysa4|Os05g47950.1  
AT5G12890.1 Orysa4|Os04g20330.1,Orysa4|Os04g42690.1,Orysa4|Os04g20260.1,Orysa4|Os04g20474.1  
AT2G22930.1,AT1G64910.1,AT1G50580.1,AT1G64920.1,AT5G54010.1,AT4G09500.2,AT3G29630.1,AT4G27560.1,A  
T5G53990.1,AT4G27570.1,AT5G54060.1 Orysa4|Os11g26950.1  
AT5G03490.1  
AT1G06000.1  
AT4G15260.1  
AT3G16520.3  
AT4G15270.1  
AT3G46690.1,AT5G37950.1,AT3G46650.1,AT5G59590.1,AT3G46670.1,AT5G38040.1,AT2G26480.1,AT3G46700.1,A  
T3G46660.1,AT5G38010.1,AT5G59580.1,AT3G46680.1,AT3G46720.1  
AT2G31750.1  
AT1G24100.1  
AT3G50740.1  
AT2G23260.1,AT2G23210.1,AT2G23250.1  
Orysa4|Os06g17220.1,Orysa4|Os06g17090.1  
Orysa4|Os08g38160.1,Orysa4|Os08g38130.1  
Orysa4|Os07g13780.1,Orysa4|Os07g13940.1  
Orysa4|Os02g11680.1,Orysa4|Os02g11700.1,Orysa4|Os02g11640.1,Orysa4|Os01g08100.1,Orysa4|Os02  
g11130.1,Orysa4|Os01g08110.1,Orysa4|Os05g08480.1,Orysa4|Os01g08090.1,Orysa4|Os02g11110.1,Orysa4|Os03g2  
4430.1  
Orysa4|Os06g39070.1,Orysa4|Os06g39080.1,Orysa4|Os06g08830.1  
Orysa4|Os04g44250.1  
Orysa4|Os04g46990.1,Orysa4|Os07g46610.1,Orysa4|Os04g47770.1,Orysa4|Os04g47720.1  
Orysa4|Os03g53350.1,Orysa4|Os05g42040.1,Orysa4|Os05g42020.1,Orysa4|Os03g59350.1  
Orysa4|Os05g08510.1  
Orysa4|Os03g11350.1  
Orysa4|Os01g66620.1  
Orysa4|Os05g42070.1  
Orysa4|Os04g12669.1,Orysa4|Os04g12690.1,Orysa4|Os04g12900.1  
Orysa4|Os03g48740.1  
Orysa4|Os09g11290.1  
Orysa4|Os04g12710.1,Orysa4|Os04g12950.1,Orysa4|Os04g12678.1  
Orysa4|Os02g14590.1,Orysa4|Os02g14630.1,Orysa4|Os02g14570.1,Orysa4|Os01g43280.1,Orysa4|Os01  
g43270.1,Orysa4|Os02g14540.1  
Orysa4|Os05g12450.1  
Orysa4|Os05g45120.1  
Orysa4|Os10g30570.1  
Orysa4|Os07g10220.1,Orysa4|Os06g11270.1,Orysa4|Os07g10240.1,Orysa4|Os03g49550.1,Orysa4|Os07  
g10190.1,Orysa4|Os02g37690.1,Orysa4|Os07g10160.1,Orysa4|Os12g37510.1,Orysa4|Os10g03320.1,Orysa4|Os03g  
59030.1  
Orysa4|Os02g56010.1  
Orysa4|Os07g10230.1  
Orysa4|Os07g47550.1  
Orysa4|Os11g09700.1  
Orysa4|Os10g12120.1  
Orysa4|Os11g04860.1  
Orysa4|Os04g25380.1,Orysa4|Os04g25800.1,Orysa4|Os02g36830.1,Orysa4|Os02g36840.1,Orysa4|Os04  
g25370.1,Orysa4|Os08g31200.1,Orysa4|Os04g25490.1,Orysa4|Os02g51930.1,Orysa4|Os04g24850.1,Orysa4|Os04g  
25980.1,Orysa4|Os02g36810.1,Orysa4|Os04g25440.1,Orysa4|Os04g25970.1  
Orysa4|Os07g30469.1,Orysa4|Os09g03140.1,Orysa4|Os07g30690.1,Orysa4|Os07g30620.1,Orysa4|Os07  
g30760.1,Orysa4|Os07g30369.1,Orysa4|Os07g30610.1  
Orysa4|Os02g28900.1

Orysa4|Os08g07180.1,Orysa4|Os08g07170.1,Orysa4|Os06g11720.1  
Orysa4|Os08g07200.1,Orysa4|Os08g07270.1  
Orysa4|Os06g11710.1  
Orysa4|Os02g45580.1  
Orysa4|Os04g46970.1  
Orysa4|Os04g24840.1,Orysa4|Os04g25820.1  
Orysa4|Os07g42970.1  
Orysa4|Os02g31990.1  
Orysa4|Os09g23400.1  
Orysa4|Os10g18480.1,Orysa4|Os10g18530.1  
Orysa4|Os10g18490.1  
Orysa4|Os01g49230.1  
Orysa4|Os04g20540.1  
Orysa4|Os04g20400.1  
AT1G14600.1 Orysa4|Os03g03760.1,Orysa4|Os04g47890.1  
AT3G04450.1,AT4G28610.1,AT5G29000.2,AT2G20400.1 Orysa4|Os07g25710.1,Orysa4|Os03g21240.1  
AT2G01060.1 Orysa4|Os09g12770.1,Orysa4|Os08g25820.1  
AT5G06800.1 Orysa4|Os04g56990.1  
AT5G45580.1 Orysa4|Os02g47190.1  
AT3G13040.1 Orysa4|Os02g04640.1,Orysa4|Os06g49040.1  
AT2G38300.1,AT2G40260.1 Orysa4|Os06g35140.1  
AT1G79430.2 Orysa4|Os02g07770.1,Orysa4|Os06g45410.1  
AT5G16560.1 Orysa4|Os08g33050.1,Orysa4|Os09g23200.1  
AT5G18240.1,AT3G04030.2 Orysa4|Os05g40960.1,Orysa4|Os07g48596.1,Orysa4|Os03g20900.1  
AT4G13640.2,AT3G24120.2 Orysa4|Os09g12750.1,Orysa4|Os08g25799.1  
AT1G32240.1,AT5G42630.1 Orysa4|Os03g55760.1  
AT2G06020.1  
AT2G42660.1  
AT3G12730.1  
AT1G69580.1  
Orysa4|Os02g07170.1  
Orysa4|Os05g41240.1  
Orysa4|Os04g51130.1  
Orysa4|Os12g01490.1  
Orysa4|Os02g46940.1  
Orysa4|Os08g06370.1  
AT3G27380.1,AT5G40650.1 Orysa4|Os08g02640.1  
AT5G65165.1 Orysa4|Os09g20440.1  
AT2G34520.1  
ATCG00330.1  
AT3G23410.1,AT4G28570.1,AT1G03990.1 Orysa4|Os10g33460.1,Orysa4|Os02g40840.1  
AT4G19380.1  
Orysa4|Os10g33550.1,Orysa4|Os10g33530.1  
Orysa4|Os08g10520.1,Orysa4|Os08g26890.1,Orysa4|Os08g25990.1,Orysa4|Os10g33540.1,Orysa4|Os10  
g33520.1  
Orysa4|Os07g04290.1  
Orysa4|Os06g30690.1  
AT1G31440.1 Orysa4|Os03g16000.1  
AT4G18060.1 Orysa4|Os07g32460.1  
AT1G69620.1,AT1G26880.1,AT3G28900.1 Orysa4|Os09g24690.1,Orysa4|Os08g33920.1,Orysa4|Os08g06040.1  
AT1G22410.1 Orysa4|Os07g42960.1  
AT4G39980.1  
AT4G33510.1  
Orysa4|Os08g37790.1  
AT4G35090.1,AT1G20630.1 Orysa4|Os03g03910.1  
Orysa4|Os02g02400.1  
Orysa4|Os06g51150.1  
AT5G44380.1,AT4G20820.1,AT5G44410.1,AT1G34575.1,AT1G30710.1,AT1G30760.1,AT2G34790.1,AT1G30700.1,A  
T5G44440.1,AT4G20860.1,AT5G44390.1,AT5G44360.1  
Orysa4|Os06g35560.1,Orysa4|Os06g35650.1,Orysa4|Os06g35660.1,Orysa4|Os11g30310.1,Orysa4|Os06  
g35700.1,Orysa4|Os06g35630.1,Orysa4|Os06g35590.1  
AT2G34810.1,AT1G26420.1,AT1G01980.1,AT1G26410.1,AT1G11770.1,AT1G30740.1,AT1G30720.1,AT1G26400.1,A  
T4G20800.1,AT5G44400.1,AT1G26380.1,AT1G26390.1,AT4G20830.1,AT4G20840.1  
Orysa4|Os07g46740.1,Orysa4|Os05g48440.1,Orysa4|Os05g48480.1  
Orysa4|Os10g21690.1  
Orysa4|Os08g06190.1,Orysa4|Os08g25490.1  
Orysa4|Os05g21140.1,Orysa4|Os01g18230.1  
Orysa4|Os08g06180.1  
AT5G16680.1,AT3G02890.1 Orysa4|Os12g24540.1  
Orysa4|Os10g42196.1  
Orysa4|Os12g06440.1,Orysa4|Os11g06130.1,Orysa4|Os12g06480.1,Orysa4|Os03g11490.1,Orysa4|Os12  
g06464.1,Orysa4|Os03g30740.1  
AT1G09720.1,AT1G58210.1,AT5G10500.1 Orysa4|Os05g39000.1,Orysa4|Os01g61910.1  
AT2G22560.1 Orysa4|Os05g02790.1  
AT2G47920.1,AT1G03470.1 Orysa4|Os07g47090.1  
AT4G03153.1  
Orysa4|Os07g49480.1  
AT1G24020.1 Orysa4|Os04g39150.1  
AT5G28010.1,AT1G70840.1,AT1G23130.1,AT1G70830.1,AT1G70880.1,AT1G35310.1,AT1G70850.1,AT5G28000.1,A  
T1G70890.1,AT1G35260.1  
AT4G09950.1,AT1G33930.1,AT1G33970.1,AT4G09940.1,AT1G33890.1,AT1G33950.1,AT1G33960.1,AT1G33900.1  
Orysa4|Os02g35130.1,Orysa4|Os04g36030.1

AT2G26820.1,AT1G33880.1,AT1G33870.1,AT1G33830.1,AT1G33910.1  
AT4G09930.1  
AT1G17220.1 Orysa4|Os05g49970.1  
AT4G11160.1 Orysa4|Os09g34010.1  
AT2G26580.1 Orysa4|Os12g42610.1,Orysa4|Os03g44710.1  
AT1G69180.1 Orysa4|Os03g11600.1  
AT1G23420.1  
Orysa4|Os07g06620.1  
AT1G76010.1,AT1G20220.1 Orysa4|Os09g37006.1  
Orysa4|Os03g52490.1,Orysa4|Os03g06980.1  
Orysa4|Os01g55000.1  
Orysa4|Os04g34940.1  
AT3G50000.1,AT5G67380.1 Orysa4|Os07g02350.1  
AT2G23080.1  
AT2G23070.1  
Orysa4|Os03g55389.1  
Orysa4|Os03g10940.1  
AT4G16830.1,AT5G47210.1 Orysa4|Os01g41880.1,Orysa4|Os01g52390.1,Orysa4|Os05g51180.1  
AT4G17520.1  
Orysa4|Os05g45660.1  
Orysa4|Os03g62830.1  
AT3G15550.1 Orysa4|Os01g08150.1  
AT3G15560.1  
Orysa4|Os02g46110.1  
Orysa4|Os05g33770.1  
AT3G20930.1 Orysa4|Os02g49820.1  
AT4G20030.1  
AT1G07620.1 Orysa4|Os11g47800.1  
AT2G17780.1,AT4G35920.1 Orysa4|Os03g06120.1  
Orysa4|Os11g44870.1,Orysa4|Os06g47780.1,Orysa4|Os11g44520.1  
Orysa4|Os12g17680.1,Orysa4|Os03g24810.1  
Orysa4|Os11g44460.1,Orysa4|Os12g31540.1  
Orysa4|Os06g34970.1  
AT5G44030.1 Orysa4|Os10g32980.1  
AT5G09870.1,AT5G64740.1,AT2G21770.1,AT4G39350.1  
Orysa4|Os07g14850.1,Orysa4|Os07g24190.1,Orysa4|Os03g62090.1  
AT1G02730.1 Orysa4|Os12g36890.1  
AT5G16910.1,AT3G03050.1 Orysa4|Os06g02180.1  
AT5G17420.1 Orysa4|Os09g25490.1  
AT4G18780.1 Orysa4|Os01g54620.1  
AT4G32410.1,AT2G25540.1 Orysa4|Os05g08370.1  
AT5G05170.1 Orysa4|Os03g59340.1,Orysa4|Os07g10770.1  
AT1G55850.1 Orysa4|Os09g30120.1,Orysa4|Os09g30130.1,Orysa4|Os02g49332.1  
AT2G33100.1 Orysa4|Os06g22980.1  
AT4G15290.1,AT4G15320.1,AT2G32620.1,AT2G32610.1,AT2G32540.1,AT2G32530.1  
Orysa4|Os04g35020.1,Orysa4|Os10g20090.1  
AT1G32180.1  
AT4G38190.1  
AT4G24010.1,AT4G24000.1,AT4G23990.1  
Orysa4|Os07g36630.1  
Orysa4|Os07g36610.1,Orysa4|Os07g36690.1,Orysa4|Os07g36750.1,Orysa4|Os07g36740.1,Orysa4|Os10  
g42750.1,Orysa4|Os08g06380.1  
Orysa4|Os12g29300.1  
Orysa4|Os10g20260.1  
Orysa4|Os06g39970.1  
Orysa4|Os04g35030.1  
AT1G51600.1,AT3G21175.1 Orysa4|Os02g05510.1  
AT4G24470.1  
Orysa4|Os03g52450.1,Orysa4|Os03g47970.1  
AT3G26790.1,AT3G24650.1 Orysa4|Os01g51610.1  
Orysa4|Os04g58000.1,Orysa4|Os08g01090.1,Orysa4|Os04g58010.1  
Orysa4|Os01g68370.1  
AT3G49470.1 Orysa4|Os03g02960.1,Orysa4|Os01g50360.1  
AT3G12390.1 Orysa4|Os01g71230.1  
AT1G33040.1  
AT5G13850.1  
Orysa4|Os07g22450.1  
AT4G32330.1,AT2G25480.1 Orysa4|Os02g10690.1  
AT2G35880.1 Orysa4|Os11g36340.1  
AT4G36250.1 Orysa4|Os04g45720.1,Orysa4|Os02g43194.1  
AT1G44170.1 Orysa4|Os12g07810.1,Orysa4|Os11g08300.1  
AT4G34240.1  
AT1G64280.1,AT4G26120.1 Orysa4|Os01g09800.1  
AT5G05390.1,AT2G40370.1 Orysa4|Os01g61160.1  
AT3G09220.1,AT5G01040.1,AT5G01050.1 Orysa4|Os12g15920.1,Orysa4|Os12g15680.1  
AT5G60020.1 Orysa4|Os01g62490.1,Orysa4|Os01g62480.1,Orysa4|Os05g38420.1  
AT5G21100.1,AT5G21105.1 Orysa4|Os06g37080.1  
AT2G38080.1,AT5G01190.1 Orysa4|Os11g48060.1  
AT5G03260.1 Orysa4|Os01g44330.1  
AT5G48100.1,AT5G09360.1  
AT2G30210.1,AT5G07130.1  
AT1G18140.1

AT2G29130.1  
AT5G58910.1  
Orysa4|Os11g01730.1,Orysa4|Os12g01730.1  
Orysa4|Os03g18640.1  
Orysa4|Os01g63200.1,Orysa4|Os01g63190.1  
Orysa4|Os07g01110.1  
Orysa4|Os12g15530.1  
Orysa4|Os11g42220.1,Orysa4|Os11g16260.1,Orysa4|Os11g42200.1,Orysa4|Os10g20610.1  
Orysa4|Os05g38390.1,Orysa4|Os05g38410.1,Orysa4|Os03g16610.1  
Orysa4|Os06g37150.1  
AT1G56110.1,AT3G12860.1 Orysa4|Os03g22880.1  
AT5G27120.1,AT3G05060.1 Orysa4|Os03g22740.1,Orysa4|Os03g22730.1  
AT5G27140.1  
Orysa4|Os07g46720.1  
AT1G62990.1 Orysa4|Os03g03164.1  
AT5G11060.1,AT5G25220.1 Orysa4|Os08g19650.1  
AT4G32040.1  
Orysa4|Os06g43860.1,Orysa4|Os02g08544.1  
AT5G20060.1 Orysa4|Os01g07960.1  
AT1G47786.1,AT1G52695.1,AT1G47780.1,AT1G52700.1,AT3G15650.1  
AT1G52460.1,AT1G52440.1  
AT1G52470.1  
AT1G64160.1,AT4G11190.1,AT4G11180.1,AT4G23690.1,AT4G11210.1  
Orysa4|Os07g44260.1,Orysa4|Os07g44370.1,Orysa4|Os07g44930.1,Orysa4|Os07g44250.1,Orysa4|Os07g44450.1,Orysa4|Os07g44380.1,Orysa4|Os07g44920.1  
AT4G17300.1 Orysa4|Os07g30200.1  
AT1G70980.1,AT5G56680.1 Orysa4|Os01g27520.1  
AT3G07420.1 Orysa4|Os12g22600.1  
AT5G38750.1  
AT1G68420.1  
AT5G23850.1,AT3G48980.1 Orysa4|Os02g42920.1  
AT1G07220.1 Orysa4|Os05g05690.1  
AT3G61290.1,AT1G63420.1,AT2G45830.1,AT2G45840.1,AT3G61280.1  
Orysa4|Os08g01150.1,Orysa4|Os06g05940.1  
Orysa4|Os04g45160.1  
AT1G67400.1 Orysa4|Os11g29350.1  
AT1G03620.1 Orysa4|Os04g01150.1  
AT3G60260.1,AT2G44770.1 Orysa4|Os02g43590.1,Orysa4|Os04g46079.1  
AT3G43400.1  
AT5G66200.1,AT4G34940.1 Orysa4|Os09g36550.1,Orysa4|Os08g43500.1  
AT3G26600.1  
AT4G36030.1  
Orysa4|Os03g14090.1,Orysa4|Os10g05730.1  
AT5G18100.1 Orysa4|Os03g11960.1  
AT2G28190.1 Orysa4|Os08g44770.1  
AT1G79950.1 Orysa4|Os01g40980.1  
AT1G20720.1,AT1G20750.1,AT2G05635.1 Orysa4|Os09g37920.1  
AT4G28220.1 Orysa4|Os06g47000.1,Orysa4|Os05g26660.1,Orysa4|Os08g04630.1  
AT4G21490.1,AT4G05020.1  
AT2G20800.1  
AT5G10730.1 Orysa4|Os02g35039.1  
AT1G32220.1 Orysa4|Os04g33060.1  
AT5G15910.1  
AT2G34480.1,AT1G29965.1,AT3G14600.1 Orysa4|Os01g54870.1,Orysa4|Os05g49030.1,Orysa4|Os01g47660.1  
AT3G62770.2 Orysa4|Os01g70780.1  
AT4G30510.1 Orysa4|Os02g54910.1  
Orysa4|Os07g47410.1  
AT3G20300.1,AT1G50630.1,AT4G22270.1 Orysa4|Os06g42850.1  
AT2G21080.1 Orysa4|Os08g41000.1  
AT1G67570.1 Orysa4|Os08g03430.1  
AT4G03820.2  
Orysa4|Os04g37520.1  
AT5G17230.1 Orysa4|Os06g51290.1  
Orysa4|Os09g38320.1  
Orysa4|Os12g43130.1  
AT5G57030.1 Orysa4|Os01g39960.1  
AT3G10230.1 Orysa4|Os02g09750.1  
AT1G63690.1 Orysa4|Os06g51430.1,Orysa4|Os02g57710.1  
AT2G43070.1 Orysa4|Os11g24540.1  
AT1G01650.1  
AT1G05820.1  
Orysa4|Os01g68620.1  
AT3G19310.1,AT1G49740.1 Orysa4|Os04g35100.1  
AT5G67130.1 Orysa4|Os09g02729.1  
AT1G13680.1 Orysa4|Os03g30130.1  
Orysa4|Os04g59310.1,Orysa4|Os08g01310.1  
AT1G07230.1 Orysa4|Os03g61130.1  
AT3G03540.1,AT3G03520.1,AT3G03530.1 Orysa4|Os03g63580.1  
AT3G48610.1  
Orysa4|Os11g38060.1  
Orysa4|Os11g38050.1  
AT3G53020.1,AT2G36620.1 Orysa4|Os05g40820.1,Orysa4|Os07g12250.1



AT3G57810.2 Orysa4|Os09g31280.1,Orysa4|Os08g39560.1  
AT2G38025.1 Orysa4|Os03g15930.1  
Orysa4|Os01g67490.1  
ATCG00340.1,ATCG00350.1 Orysa4|Os10g38248.1  
Orysa4|Os04g16760.1,Orysa4|Os04g16750.1,Orysa4|Os10g38229.1,Orysa4|Os10g21250.1  
AT3G48560.1 Orysa4|Os04g32010.1,Orysa4|Os02g30630.1  
Orysa4|Os06g51280.1  
AT5G47040.1 Orysa4|Os09g36300.1  
AT3G05790.1,AT5G26860.1 Orysa4|Os07g48960.1  
AT3G05780.1  
AT3G13850.1 Orysa4|Os08g31080.1  
AT1G06280.1 Orysa4|Os01g14030.1  
AT1G31320.1 Orysa4|Os03g45750.1  
AT3G58190.1 Orysa4|Os08g44940.1,Orysa4|Os03g05510.1  
AT2G42430.1 Orysa4|Os02g57490.1  
AT2G23660.1,AT5G66870.1 Orysa4|Os03g41600.1  
AT1G07900.1,AT2G28500.1 Orysa4|Os03g17810.1  
AT2G30130.1 Orysa4|Os05g27980.1  
AT3G47870.1  
AT1G72980.1  
AT1G16530.1  
AT5G06080.1  
AT2G42440.1  
AT2G31310.1  
AT3G50510.1  
AT3G27940.1  
AT4G22700.1  
AT3G26620.1,AT3G26660.1  
Orysa4|Os01g39220.1  
Orysa4|Os03g05500.1  
Orysa4|Os05g03160.1  
Orysa4|Os01g39160.1,Orysa4|Os01g39150.1  
Orysa4|Os01g39180.1  
Orysa4|Os08g06659.1  
Orysa4|Os02g48270.1  
Orysa4|Os12g01550.1,Orysa4|Os11g01550.1  
Orysa4|Os04g33250.1  
AT5G25360.1 Orysa4|Os02g10720.1  
AT3G54880.1 Orysa4|Os07g29640.1  
AT3G15770.1,AT1G15350.1  
AT5G03440.1  
Orysa4|Os01g07750.1  
AT5G04200.1 Orysa4|Os11g04010.1  
AT1G79310.1,AT1G79320.1,AT1G79330.1,AT1G79340.1  
Orysa4|Os05g41660.1,Orysa4|Os05g41670.1,Orysa4|Os01g58580.1  
AT1G16420.1  
AT1G76140.1,AT1G20380.1 Orysa4|Os04g47360.1  
Orysa4|Os01g01830.1  
AT3G02800.1,AT5G16480.1 Orysa4|Os12g23190.1  
AT1G05000.1,AT2G32960.1 Orysa4|Os09g05020.1  
AT4G03960.1  
Orysa4|Os06g10650.1  
Orysa4|Os02g53160.1  
AT5G13500.1 Orysa4|Os01g16600.1,Orysa4|Os05g32060.1  
AT5G18650.1 Orysa4|Os12g35320.1  
AT5G25560.1 Orysa4|Os01g52110.1  
AT5G22920.1 Orysa4|Os10g31850.1  
AT3G62970.1  
Orysa4|Os03g22680.1  
Orysa4|Os03g05270.1  
AT3G22290.1 Orysa4|Os03g57100.1  
AT1G36050.1,AT1G22200.1 Orysa4|Os05g41120.1,Orysa4|Os03g20520.1  
AT2G23093.1,AT1G64650.1,AT3G49310.1,AT4G27720.1 Orysa4|Os08g02190.1  
Orysa4|Os10g37520.1,Orysa4|Os03g02380.1  
AT5G24490.1 Orysa4|Os03g63950.1  
AT1G25141.1,AT1G25210.1,AT1G24793.1,AT1G25054.1,AT1G24880.1 Orysa4|Os03g12320.1  
AT5G43330.1,AT1G04410.1 Orysa4|Os10g33800.1  
AT5G56720.1  
Orysa4|Os04g46560.1  
AT3G26430.1 Orysa4|Os07g39750.1,Orysa4|Os07g39740.1  
AT5G45910.1 Orysa4|Os05g11950.1,Orysa4|Os01g11710.1,Orysa4|Os01g11620.1,Orysa4|Os06g34120.1  
AT3G48460.1 Orysa4|Os03g62740.1  
AT1G09390.1,AT1G56670.1 Orysa4|Os01g22640.1,Orysa4|Os01g22660.1  
AT1G28650.1,AT1G28640.1,AT1G28660.1,AT1G28590.1,AT1G28600.1,AT1G28610.2,AT1G28670.1,AT1G31550.2,A  
T1G28580.1,AT1G28570.1,AT2G27360.1 Orysa4|Os01g42730.1,Orysa4|Os01g46120.1  
AT4G01130.1 Orysa4|Os06g06520.1  
AT3G27950.1,AT5G14450.1  
AT1G67830.1  
AT3G62280.1  
Orysa4|Os01g11730.1,Orysa4|Os06g34070.1,Orysa4|Os05g11970.1,Orysa4|Os02g15230.1,Orysa4|Os06  
g06290.1,Orysa4|Os05g43120.1,Orysa4|Os06g06260.1,Orysa4|Os01g12320.1,Orysa4|Os01g11760.1,Orysa4|Os01g  
11650.1,Orysa4|Os01g11750.1

Orysa4|Os02g39170.1  
Orysa4|Os01g46260.1  
Orysa4|Os05g04240.1  
Orysa4|Os01g22780.1  
Orysa4|Os05g06710.1  
Orysa4|Os05g06720.1  
Orysa4|Os06g03900.1,Orysa4|Os10g25400.1,Orysa4|Os05g43100.1,Orysa4|Os01g11790.1,Orysa4|Os06  
g47910.1,Orysa4|Os01g11660.1  
Orysa4|Os10g25420.1,Orysa4|Os10g25380.1,Orysa4|Os10g25340.1,Orysa4|Os03g25030.1  
Orysa4|Os06g03890.1,Orysa4|Os01g11700.1  
Orysa4|Os02g39590.1,Orysa4|Os11g31940.1  
Orysa4|Os05g43090.1,Orysa4|Os05g43110.1  
Orysa4|Os03g25000.1,Orysa4|Os03g25010.1  
Orysa4|Os01g46210.1,Orysa4|Os01g46220.1  
AT1G06900.1 Orysa4|Os03g21810.1  
AT3G57470.1,AT2G41790.1 Orysa4|Os07g38260.1,Orysa4|Os07g38280.1,Orysa4|Os07g38270.1  
AT5G01440.1  
AT3G57460.1  
Orysa4|Os01g57082.1  
AT4G00650.1 Orysa4|Os03g63440.1  
AT5G48385.1 Orysa4|Os09g07380.1,Orysa4|Os09g07360.1  
AT5G16320.1,AT1G31814.1  
AT5G27230.1  
Orysa4|Os03g39160.1  
Orysa4|Os07g40270.1  
AT3G18520.2 Orysa4|Os07g06980.1  
AT4G35300.1 Orysa4|Os10g39440.1,Orysa4|Os02g13560.1  
AT3G51490.1  
AT1G20840.1  
Orysa4|Os10g13460.1,Orysa4|Os03g03680.1  
Orysa4|Os10g13440.1  
Orysa4|Os11g28610.1  
Orysa4|Os02g58530.1  
AT3G13050.1 Orysa4|Os09g38690.1  
Orysa4|Os03g43720.1,Orysa4|Os07g38400.1  
Orysa4|Os04g51970.1  
AT3G44340.1,AT4G32640.1 Orysa4|Os12g24250.1,Orysa4|Os11g29200.1  
AT3G07100.1 Orysa4|Os04g04020.1  
AT5G22220.1 Orysa4|Os04g33950.1,Orysa4|Os02g33430.1,Orysa4|Os12g06200.1  
AT2G36010.2  
AT1G47870.1  
Orysa4|Os04g02140.1  
AT5G62940.1 Orysa4|Os02g47810.1  
AT2G37590.1,AT5G02460.1  
Orysa4|Os03g16850.1,Orysa4|Os03g60630.1,Orysa4|Os12g38200.1,Orysa4|Os07g13260.1  
AT3G52440.1 Orysa4|Os05g36900.1,Orysa4|Os01g64590.1  
AT5G39660.1 Orysa4|Os01g15900.1,Orysa4|Os07g48570.1  
AT5G65590.1 Orysa4|Os07g32510.1,Orysa4|Os03g38870.1  
AT4G21040.1,AT4G21030.1,AT4G21080.1,AT1G28310.2,AT4G21050.1  
AT5G66940.1  
AT1G07640.3,AT2G28810.1  
AT3G55370.2  
AT5G60850.1  
AT1G21340.1  
AT2G28510.1  
AT2G34140.1  
AT5G62430.1,AT3G47500.1  
AT1G51700.1,AT3G21270.1  
AT3G45610.1,AT5G60200.1  
AT4G38000.1  
Orysa4|Os08g38220.1  
Orysa4|Os10g35300.1  
Orysa4|Os03g07360.1,Orysa4|Os10g26620.1  
Orysa4|Os01g55340.1  
AT4G24740.1 Orysa4|Os12g27520.1  
AT4G32660.1 Orysa4|Os01g40840.1  
AT3G53570.1 Orysa4|Os01g62080.1  
AT5G13020.1 Orysa4|Os09g10710.1,Orysa4|Os08g23930.1  
AT5G06780.1,AT3G12140.3  
AT2G44440.1  
Orysa4|Os10g30054.1  
Orysa4|Os08g39970.1,Orysa4|Os04g56440.1  
AT2G06530.1 Orysa4|Os07g13270.1  
AT5G44560.1 Orysa4|Os03g43860.1  
AT1G03950.1 Orysa4|Os10g33660.1  
Orysa4|Os11g47710.1  
Orysa4|Os07g10480.1  
AT1G52690.1,AT3G15670.1 Orysa4|Os05g46480.1  
AT2G27760.1 Orysa4|Os01g73760.1  
AT3G23630.1,AT3G63110.1,AT5G19040.1 Orysa4|Os03g59570.1  
Orysa4|Os03g24240.1,Orysa4|Os05g24660.1,Orysa4|Os03g24440.1  
AT5G37470.1,AT5G37920.1,AT4G09440.1,AT5G37460.1,AT5G37650.1,AT5G37430.1,AT4G16530.1,AT5G37420.1,A

T5G37400.1,AT5G37410.1 Orysa4|Os10g36340.1  
AT5G52660.2 Orysa4|Os02g45670.1  
AT5G02840.1,AT3G09600.1  
AT1G01520.1,AT4G01280.2  
Orysa4|Os01g06320.1  
Orysa4|Os06g45840.1  
AT3G29763.1,AT3G29765.1,AT4G09660.1,AT1G19260.1 Orysa4|Os01g08610.1,Orysa4|Os02g43780.1  
AT3G29450.1,AT1G41920.1  
AT1G42710.1  
Orysa4|Os02g26460.1,Orysa4|Os04g15910.1,Orysa4|Os02g13930.1,Orysa4|Os02g38700.1  
Orysa4|Os04g16130.1,Orysa4|Os11g39200.1,Orysa4|Os06g11830.1,Orysa4|Os02g27100.1,Orysa4|Os07  
g15340.1,Orysa4|Os08g27290.1,Orysa4|Os08g24480.1,Orysa4|Os10g29170.1,Orysa4|Os05g10640.1,Orysa4|Os11g  
14270.1,Orysa4|Os06g02090.1,Orysa4|Os11g14280.1  
Orysa4|Os11g28740.1,Orysa4|Os06g36530.1,Orysa4|Os05g14500.1  
Orysa4|Os04g21740.1,Orysa4|Os04g12190.1,Orysa4|Os12g34390.1  
Orysa4|Os06g23540.1,Orysa4|Os09g14530.1,Orysa4|Os08g34830.1,Orysa4|Os01g18920.1  
Orysa4|Os07g28150.1  
Orysa4|Os08g07550.1,Orysa4|Os05g35300.1  
Orysa4|Os02g19850.1  
Orysa4|Os09g19150.1  
Orysa4|Os02g19230.1  
Orysa4|Os12g08960.1  
AT1G30690.1 Orysa4|Os06g45990.1  
AT1G72150.1,AT1G22530.1 Orysa4|Os05g35460.1,Orysa4|Os01g65380.1  
AT1G72160.1,AT4G09160.1  
AT4G27890.1,AT5G53400.1 Orysa4|Os06g12530.1  
Orysa4|Os02g51000.1  
AT3G21430.1 Orysa4|Os03g43800.1  
AT3G21440.1  
AT3G05380.2,AT5G27610.1  
AT5G51670.1 Orysa4|Os03g64130.1  
AT5G04550.1 Orysa4|Os12g05180.1  
AT3G23160.1 Orysa4|Os04g08764.1  
Orysa4|Os05g38320.1,Orysa4|Os03g16390.1  
Orysa4|Os10g23840.1,Orysa4|Os08g13850.1,Orysa4|Os01g62670.1  
AT5G19980.1 Orysa4|Os08g10350.1  
AT1G76340.1 Orysa4|Os02g06010.1,Orysa4|Os03g11590.1  
AT2G41630.1,AT3G10330.1 Orysa4|Os09g36440.1  
AT3G29380.1  
AT4G10680.1  
AT3G57370.1  
AT5G39230.1  
Orysa4|Os03g09820.1,Orysa4|Os05g47480.1  
Orysa4|Os07g32120.1,Orysa4|Os07g32080.1  
AT3G46960.1 Orysa4|Os02g06500.1  
AT1G59760.1 Orysa4|Os12g18140.1  
AT2G06990.1 Orysa4|Os11g07500.1  
AT1G76580.1,AT1G20980.1 Orysa4|Os08g40260.1  
AT1G03090.2 Orysa4|Os12g41250.1  
AT5G35360.1  
AT3G08570.1,AT3G08660.1 Orysa4|Os11g02620.1,Orysa4|Os12g02540.1  
AT1G67900.1,AT3G26490.1 Orysa4|Os02g38120.1,Orysa4|Os04g40100.1  
AT3G49900.1 Orysa4|Os07g39850.1  
AT3G15570.1,AT1G52770.1 Orysa4|Os05g08530.1,Orysa4|Os01g08130.1  
AT5G64330.1 Orysa4|Os02g35970.1  
AT2G14820.1 Orysa4|Os12g39380.1,Orysa4|Os03g10800.1,Orysa4|Os03g41350.1  
AT1G30440.1 Orysa4|Os03g43990.1,Orysa4|Os12g41910.1  
AT5G67385.1,AT3G49970.1 Orysa4|Os03g10880.1  
AT1G03010.1,AT2G47860.1 Orysa4|Os03g22600.1  
AT1G50280.1,AT3G19850.1 Orysa4|Os04g57800.1  
AT4G31820.1 Orysa4|Os09g25330.1,Orysa4|Os06g08550.1  
AT2G30520.1 Orysa4|Os11g02610.1,Orysa4|Os12g02530.1  
AT3G22104.1 Orysa4|Os07g36230.1  
AT5G03250.1 Orysa4|Os01g57230.1  
AT3G50840.1,AT5G66560.1 Orysa4|Os03g55830.1  
AT5G48130.1 Orysa4|Os07g39530.1  
AT5G48800.1  
AT5G67440.1,AT4G37590.1  
AT2G23050.1  
AT3G44820.1  
AT5G17580.1  
AT5G10250.1  
AT5G13600.1  
Orysa4|Os08g23420.1,Orysa4|Os09g29350.1  
Orysa4|Os08g21650.1  
Orysa4|Os07g44570.1  
Orysa4|Os05g11190.1  
Orysa4|Os07g44580.1,Orysa4|Os12g31320.1  
AT1G56600.1,AT2G47180.1,AT1G09350.1 Orysa4|Os07g48830.1,Orysa4|Os03g20120.1  
AT1G60470.1,AT1G60450.1  
AT5G30500.1,AT5G23790.1,AT4G26250.1  
AT1G09730.1 Orysa4|Os05g11770.1

AT1G10570.1,AT1G60220.1 Orysa4|Os06g29310.1  
AT4G33620.1  
Orysa4|Os12g41380.1  
Orysa4|Os01g53630.1  
AT5G42090.1 Orysa4|Os06g04130.1  
AT5G18520.1,AT3G09570.1,AT5G02630.1 Orysa4|Os01g61970.1,Orysa4|Os05g38720.1  
Orysa4|Os02g40550.1,Orysa4|Os04g42960.1  
Orysa4|Os01g61960.1  
AT1G80280.1,AT1G15490.1 Orysa4|Os01g45960.1  
AT3G55880.2,AT2G40095.1 Orysa4|Os03g03200.1  
AT1G52750.1  
AT2G29390.1,AT1G07420.1 Orysa4|Os07g01150.1,Orysa4|Os11g48020.1  
AT4G22753.1,AT4G22756.1,AT4G12110.1 Orysa4|Os10g39810.1  
Orysa4|Os03g01820.1  
AT4G00630.1,AT1G01790.1 Orysa4|Os04g58620.1  
AT4G04850.1 Orysa4|Os12g42300.1  
AT4G00640.1  
AT5G53390.1,AT3G49190.1,AT3G49210.1,AT5G37300.1,AT5G22490.1,AT3G49200.1,AT5G16350.1,AT1G72110.1,A  
T5G12420.1,AT2G38995.1 Orysa4|Os05g48260.1,Orysa4|Os01g48874.1  
AT5G53380.1  
Orysa4|Os01g56370.1  
AT1G43620.1 Orysa4|Os01g64750.1  
AT3G07020.1 Orysa4|Os04g04254.1  
Orysa4|Os07g23750.1  
Orysa4|Os07g23740.1  
Orysa4|Os04g04240.1  
AT4G05320.2 Orysa4|Os06g46770.1,Orysa4|Os02g06640.1  
AT2G36170.1,AT3G52590.1 Orysa4|Os09g39500.1,Orysa4|Os03g13170.1  
AT1G31340.1 Orysa4|Os09g25320.1  
AT3G09790.1  
Orysa4|Os05g42424.1  
Orysa4|Os04g53620.1  
Orysa4|Os07g30640.1,Orysa4|Os09g27930.1  
Orysa4|Os09g31019.1  
Orysa4|Os01g45420.1  
Orysa4|Os06g44080.1  
Orysa4|Os01g45400.1  
AT1G55800.1,AT1G55790.1 Orysa4|Os09g30210.1,Orysa4|Os09g30200.1  
AT5G25030.1,AT5G56075.1,AT5G56060.1  
AT4G30120.1,AT4G30110.1 Orysa4|Os07g12900.1  
AT2G19110.1  
AT4G14716.1,AT4G14710.2,AT2G26400.1 Orysa4|Os03g06620.1,Orysa4|Os10g28350.1  
AT5G43850.1  
Orysa4|Os04g27830.1  
AT4G38650.1 Orysa4|Os03g14010.1  
AT4G33830.1,AT4G33840.1,AT4G33860.1 Orysa4|Os03g10440.1,Orysa4|Os10g21100.1,Orysa4|Os03g10478.1  
AT4G33810.1,AT2G14690.1,AT4G33820.1  
AT4G33850.1  
Orysa4|Os03g10469.1  
AT1G73170.1 Orysa4|Os06g06190.1  
AT3G10420.2 Orysa4|Os07g08970.1  
AT5G11490.1 Orysa4|Os01g43630.1  
AT4G11380.1,AT4G23460.1 Orysa4|Os03g23950.1  
AT5G18490.1,AT5G43950.1,AT3G04350.1 Orysa4|Os03g04930.1  
AT3G01870.1,AT2G44260.2,AT2G44230.1,AT3G01880.1 Orysa4|Os07g38840.1  
AT1G04090.1  
Orysa4|Os03g51150.1  
AT5G46180.1 Orysa4|Os03g44150.1  
AT1G80600.1 Orysa4|Os05g03830.1  
Orysa4|Os07g27780.1  
AT1G66020.1,AT1G70080.1,AT3G29110.1,AT1G31950.1,AT4G13280.1,AT1G48820.1,AT4G20210.1,AT3G14520.1,A  
T3G29410.1,AT4G13300.1,AT4G20230.1,AT1G48800.1,AT2G23230.1,AT5G48110.1,AT3G29190.1,AT5G44630.1,AT  
3G32030.1,AT1G33750.1,AT5G23960.1,AT3G14490.1,AT3G14540.1,AT4G15870.1,AT4G20200.1  
Orysa4|Os03g24690.1,Orysa4|Os03g24680.1,Orysa4|Os08g07080.1,Orysa4|Os04g27190.1,Orysa4|Os08  
g07120.1,Orysa4|Os01g23530.1,Orysa4|Os04g27790.1,Orysa4|Os08g04500.1,Orysa4|Os04g27400.1  
AT1G61680.1 Orysa4|Os10g34790.1,Orysa4|Os02g02930.1  
AT3G25830.1,AT4G16730.1,AT3G25820.1,AT3G25810.1,AT4G16740.1  
AT3G31415.1  
AT2G24210.1  
Orysa4|Os03g24650.1,Orysa4|Os04g27720.1,Orysa4|Os04g27760.1,Orysa4|Os04g27540.1,Orysa4|Os03  
g22620.1,Orysa4|Os04g26960.1,Orysa4|Os01g42610.1,Orysa4|Os04g27430.1,Orysa4|Os04g26980.1,Orysa4|Os05  
17010.1,Orysa4|Os04g27070.1,Orysa4|Os03g22634.1  
Orysa4|Os03g24720.1,Orysa4|Os05g24500.1  
Orysa4|Os08g07100.1,Orysa4|Os02g26014.1  
Orysa4|Os04g27480.1  
AT5G55470.1 Orysa4|Os06g21360.1  
AT4G30160.1,AT5G57320.1 Orysa4|Os06g44890.1  
AT2G41740.1,AT3G57410.1 Orysa4|Os03g24220.1  
AT2G29890.1  
Orysa4|Os08g14230.1,Orysa4|Os04g51440.1  
AT3G25530.1 Orysa4|Os02g35500.1  
AT1G17650.1 Orysa4|Os01g39270.1

AT1G07490.1,AT2G29125.1,AT5G59510.1,AT2G39705.1 Orysa4|Os05g08620.1  
Orysa4|Os05g38380.1  
Orysa4|Os05g01960.1  
AT4G26840.1,AT5G55160.1 Orysa4|Os01g68950.1,Orysa4|Os01g68940.1  
AT5G48700.1,AT5G48710.1  
AT5G55170.1  
AT5G55855.1  
AT2G32765.1  
AT5G16760.1 Orysa4|Os10g42550.1  
AT4G08170.2 Orysa4|Os10g01480.1,Orysa4|Os03g51610.1  
AT4G33770.1  
Orysa4|Os02g26720.1  
Orysa4|Os03g12840.1  
AT2G05710.1 Orysa4|Os08g09200.1  
AT4G35830.1  
AT4G26970.1  
Orysa4|Os06g19960.1  
AT5G21060.3 Orysa4|Os11g03470.1,Orysa4|Os12g03190.1  
AT4G19710.2,AT1G31230.1 Orysa4|Os09g12290.1,Orysa4|Os08g25390.1  
Orysa4|Os09g21490.1  
AT1G74320.1 Orysa4|Os05g45880.1,Orysa4|Os01g51920.1  
AT2G26830.1 Orysa4|Os09g26700.1  
AT1G71697.1,AT4G09760.1  
AT4G01995.1 Orysa4|Os05g04070.1  
AT1G03055.1 Orysa4|Os11g37650.1  
AT2G31170.1 Orysa4|Os09g38420.1  
AT5G38830.1,AT3G56300.1  
Orysa4|Os10g32570.1,Orysa4|Os03g04960.1  
AT1G65950.1 Orysa4|Os11g34750.1  
AT3G07700.1 Orysa4|Os09g07660.1  
AT1G23070.1 Orysa4|Os03g29340.1  
AT4G38360.2 Orysa4|Os06g51100.1  
AT1G77220.1 Orysa4|Os05g44080.1  
Orysa4|Os02g44910.1  
Orysa4|Os04g47530.1  
AT4G22530.1,AT5G10830.1 Orysa4|Os01g40660.1  
AT3G61210.1,AT3G54150.1,AT1G55450.1  
AT2G41380.1  
Orysa4|Os01g51870.1  
AT5G01260.2 Orysa4|Os05g37450.1,Orysa4|Os01g63810.1  
AT4G24670.1 Orysa4|Os05g07720.1,Orysa4|Os01g07500.1  
AT1G34060.1,AT1G34040.1 Orysa4|Os01g52010.1,Orysa4|Os01g51980.1  
AT1G70560.1,AT1G23320.1  
AT1G52300.1,AT3G16080.1,AT1G15250.1 Orysa4|Os08g03450.1,Orysa4|Os02g56990.1,Orysa4|Os02g02130.1  
AT5G01990.1 Orysa4|Os05g40330.1,Orysa4|Os01g60230.1  
AT1G71090.1 Orysa4|Os08g09190.1  
ATMG00860.1  
Orysa4|Os12g27160.1,Orysa4|Os05g41320.1,Orysa4|Os01g55390.1,Orysa4|Os11g44640.1,Orysa4|Os05g22560.1,Orysa4|Os11g29180.1,Orysa4|Os05g18690.1  
Orysa4|Os05g11400.1,Orysa4|Os11g27700.1,Orysa4|Os03g23150.1  
AT3G27620.1,AT3G22360.1,AT3G22370.1 Orysa4|Os02g47200.1,Orysa4|Os04g51150.1  
AT5G64210.1  
AT1G32350.1  
Orysa4|Os05g39360.1,Orysa4|Os04g46770.1,Orysa4|Os06g07570.1  
Orysa4|Os02g21300.1  
Orysa4|Os04g51160.1  
AT4G25740.1,AT5G52650.1 Orysa4|Os01g73160.1,Orysa4|Os02g34460.1,Orysa4|Os04g35090.1  
AT5G41520.1  
AT2G40490.1 Orysa4|Os03g21900.1  
AT3G14930.1 Orysa4|Os01g43390.1  
Orysa4|Os03g22060.1  
AT5G56940.1 Orysa4|Os08g40610.1,Orysa4|Os09g32270.1  
AT4G34620.1  
ATCG00050.1  
AT3G62040.1 Orysa4|Os07g44060.1  
AT5G02230.1 Orysa4|Os03g16670.1  
AT5G59490.1  
AT5G59480.1  
Orysa4|Os01g74152.1  
AT4G32940.1,AT2G25940.1 Orysa4|Os01g37910.1  
AT1G62710.1 Orysa4|Os04g45470.1,Orysa4|Os02g43010.1  
AT3G20210.1  
Orysa4|Os05g51570.1,Orysa4|Os06g01610.1  
AT2G47610.1,AT3G62870.1 Orysa4|Os08g23710.1,Orysa4|Os09g32976.1  
Orysa4|Os01g70010.1  
AT5G07440.1 Orysa4|Os02g43470.1  
AT5G18170.1,AT3G03910.1 Orysa4|Os03g58040.1  
Orysa4|Os04g45970.1  
AT1G12920.1,AT3G26618.1 Orysa4|Os03g49580.1,Orysa4|Os07g39870.1  
AT5G47880.1  
Orysa4|Os01g71270.1  
Orysa4|Os05g31020.1

AT1G19220.1,AT5G20730.1 Orysa4|Os06g09660.1  
AT1G30330.2 Orysa4|Os02g06910.1,Orysa4|Os06g46410.1  
AT2G33860.1 Orysa4|Os01g54990.1,Orysa4|Os01g48060.1,Orysa4|Os05g43920.1,Orysa4|Os05g48870.1  
AT5G62000.1 Orysa4|Os01g70270.1  
AT4G30080.1 Orysa4|Os10g33940.1,Orysa4|Os06g47150.1,Orysa4|Os02g41800.1  
AT1G59750.1 Orysa4|Os02g35140.1  
AT5G37020.1 Orysa4|Os04g57610.1  
AT1G19850.1  
AT1G34170.1  
ATMG00940.1,AT1G77850.1  
AT2G28350.1  
AT1G35240.1,AT3G61830.1,AT1G34390.1,AT1G35540.1,AT1G34410.1,AT1G34310.1,AT2G46530.3,AT1G35520.1,A  
T4G23980.1  
AT1G43950.1  
AT5G60450.1  
Orysa4|Os07g08540.1,Orysa4|Os07g08530.1  
Orysa4|Os08g40900.1,Orysa4|Os06g48950.1  
Orysa4|Os02g04810.1  
Orysa4|Os12g41950.1  
Orysa4|Os04g56850.1  
Orysa4|Os11g32110.1,Orysa4|Os12g29520.1  
Orysa4|Os07g08600.1  
Orysa4|Os02g46710.1  
AT2G32030.1,AT2G32020.1 Orysa4|Os03g58020.1,Orysa4|Os03g58030.1,Orysa4|Os03g58010.1  
Orysa4|Os03g46200.1,Orysa4|Os04g18810.1  
AT1G29310.1,AT2G34250.1 Orysa4|Os09g17830.1,Orysa4|Os09g17840.1,Orysa4|Os03g11440.1  
AT1G78720.1  
Orysa4|Os12g43300.1  
Orysa4|Os12g41840.1  
AT2G20340.1 Orysa4|Os07g25590.1  
AT4G28680.1  
Orysa4|Os10g23900.1,Orysa4|Os05g43510.1,Orysa4|Os10g26110.1,Orysa4|Os01g56380.1  
Orysa4|Os08g04560.1,Orysa4|Os08g04540.1  
AT1G44790.1 Orysa4|Os04g37580.1  
AT5G26220.1,AT4G31290.1 Orysa4|Os02g26700.1  
AT5G18110.1 Orysa4|Os03g15590.1  
AT5G35620.1 Orysa4|Os10g32970.1  
AT4G18040.1 Orysa4|Os01g73880.1  
AT1G29590.1,AT1G29550.1  
AT2G36250.1,AT3G52750.1 Orysa4|Os03g44420.1  
AT5G55280.1 Orysa4|Os04g56970.1  
Orysa4|Os05g37160.1  
AT2G21580.1,AT4G34555.1,AT4G39200.1 Orysa4|Os11g05562.1,Orysa4|Os09g39540.1,Orysa4|Os08g44480.1  
AT2G16360.1  
AT1G11870.2 Orysa4|Os11g39670.1  
AT5G27470.1 Orysa4|Os03g10190.1,Orysa4|Os01g37837.1  
AT5G25530.1 Orysa4|Os08g06460.1  
AT5G16650.1 Orysa4|Os02g46640.1  
AT2G33735.1 Orysa4|Os02g52270.1  
AT2G41000.1 Orysa4|Os01g17040.1  
AT3G14200.1 Orysa4|Os02g54130.1,Orysa4|Os06g09560.1  
AT5G49060.1 Orysa4|Os05g30130.1  
AT4G13830.2 Orysa4|Os01g01160.1  
AT1G59725.1  
AT1G72416.1  
Orysa4|Os08g28700.1  
Orysa4|Os02g03600.1  
Orysa4|Os08g35160.1  
Orysa4|Os09g20320.1  
AT5G01650.1 Orysa4|Os11g01600.1,Orysa4|Os12g01680.1  
AT3G51660.1  
AT4G31440.1,AT2G24530.1 Orysa4|Os04g56300.1  
AT4G33890.1,AT2G14850.1 Orysa4|Os12g39090.1  
Orysa4|Os04g21650.1  
Orysa4|Os02g03680.1  
Orysa4|Os03g55450.1  
AT1G72820.1,AT5G26200.1 Orysa4|Os03g07890.1,Orysa4|Os10g25830.1  
AT5G15640.1 Orysa4|Os03g54760.1  
Orysa4|Os09g27240.1  
Orysa4|Os01g22600.1  
AT5G04890.1 Orysa4|Os05g51440.1,Orysa4|Os01g40550.1  
AT5G20970.1,AT2G27140.1 Orysa4|Os03g45340.1  
AT3G10680.1  
Orysa4|Os03g06170.1  
Orysa4|Os01g40530.1  
Orysa4|Os03g45330.1,Orysa4|Os10g30180.1  
AT5G23570.1 Orysa4|Os12g09580.1  
AT5G17310.2,AT3G03250.1 Orysa4|Os02g02560.1,Orysa4|Os09g38030.1  
Orysa4|Os01g15910.1  
AT5G45470.1,AT5G45530.1,AT5G45480.1,AT5G45540.1,AT4G19090.1  
Orysa4|Os10g20770.1,Orysa4|Os07g01840.1,Orysa4|Os07g01520.1  
Orysa4|Os10g10480.1,Orysa4|Os11g39920.1,Orysa4|Os10g05410.1,Orysa4|Os02g14700.1,Orysa4|Os12

g21940.1,Orysa4|Os04g07040.1,Orysa4|Os04g05090.1,Orysa4|Os04g07110.1,Orysa4|Os08g05370.1,Orysa4|Os10g39570.1,Orysa4|Os04g05700.1,Orysa4|Os04g14540.1,Orysa4|Os02g14870.1,Orysa4|Os04g08080.1,Orysa4|Os04g06990.1,Orysa4|Os05g25890.1,Orysa4|Os02g14810.1,Orysa4|Os10g05440.1,Orysa4|Os11g15510.1,Orysa4|Os04g06900.1,Orysa4|Os04g06910.1,Orysa4|Os01g58500.1,Orysa4|Os07g08270.1,Orysa4|Os08g04490.1,Orysa4|Os09g38930.1,Orysa4|Os04g08190.1,Orysa4|Os10g05300.1,Orysa4|Os04g06920.1,Orysa4|Os07g16930.1,Orysa4|Os04g07250.1,Orysa4|Os11g42030.1,Orysa4|Os04g12110.1,Orysa4|Os08g11500.1,Orysa4|Os04g06930.1,Orysa4|Os08g05410.1,Orysa4|Os07g08290.1,Orysa4|Os01g72380.1,Orysa4|Os11g43180.1,Orysa4|Os04g06810.1,Orysa4|Os07g16600.1,Orysa4|Os07g26560.1,Orysa4|Os08g09570.1,Orysa4|Os04g06840.1,Orysa4|Os05g14680.1,Orysa4|Os05g46690.1  
Orysa4|Os07g17050.1,Orysa4|Os07g16740.1,Orysa4|Os06g49000.1,Orysa4|Os12g40200.1  
Orysa4|Os04g05770.1  
Orysa4|Os05g31710.1  
AT2G21450.1,AT2G16390.1 Orysa4|Os06g14440.1,Orysa4|Os07g25390.1  
AT1G05480.1,AT3G24340.1 Orysa4|Os02g43460.1,Orysa4|Os05g32610.1  
Orysa4|Os08g19260.1,Orysa4|Os08g14610.1  
Orysa4|Os03g06920.1  
Orysa4|Os08g19270.1  
AT4G26110.1,AT5G56950.1,AT2G19480.1 Orysa4|Os06g05660.1  
Orysa4|Os01g51450.1,Orysa4|Os06g40920.1  
AT1G16710.1,AT3G12980.1,AT1G79000.1 Orysa4|Os02g04490.1  
AT1G67220.1  
AT1G55970.1  
Orysa4|Os06g49130.1,Orysa4|Os01g14370.1  
AT3G11910.1,AT5G06600.1 Orysa4|Os12g30540.1,Orysa4|Os11g36470.1  
Orysa4|Os03g31079.1  
Orysa4|Os07g06950.1  
Orysa4|Os01g56490.1  
AT4G01800.1 Orysa4|Os01g21820.1  
AT1G21650.1 Orysa4|Os11g08980.1  
Orysa4|Os05g34880.1  
AT4G02930.1 Orysa4|Os03g63410.1  
AT4G20360.1 Orysa4|Os02g38210.1  
AT4G02780.1 Orysa4|Os02g17780.1  
Orysa4|Os02g36210.1,Orysa4|Os04g09900.1  
Orysa4|Os09g15050.1  
AT1G68830.1 Orysa4|Os05g47560.1  
AT5G65110.1 Orysa4|Os11g39220.1  
AT1G06310.1,AT1G06290.1 Orysa4|Os06g24704.1  
AT3G06690.1  
AT5G05830.1 Orysa4|Os05g37900.1  
AT2G34200.1 Orysa4|Os01g53130.1,Orysa4|Os05g11720.1  
AT5G01070.1  
AT2G37950.1  
AT5G59000.1  
AT1G58390.1,AT1G58410.1,AT5G35450.1,AT1G50180.1,AT3G46530.1,AT5G43470.1,AT1G58807.1,AT1G59124.1,AT3G46710.1,AT1G10920.1,AT1G53350.1,AT5G48620.1,AT1G58400.1,AT3G46730.1,AT1G59780.1,AT1G59620.1  
Orysa4|Os10g10360.1,Orysa4|Os11g41540.1  
AT3G14470.1 Orysa4|Os05g41310.1,Orysa4|Os05g41290.1  
AT3G07040.1  
Orysa4|Os10g07978.1,Orysa4|Os07g08890.1,Orysa4|Os09g09490.1,Orysa4|Os06g22460.1,Orysa4|Os01g36640.1,Orysa4|Os02g09790.1,Orysa4|Os10g21400.1,Orysa4|Os08g09430.1,Orysa4|Os04g46300.1,Orysa4|Os11g35580.1,Orysa4|Os04g21890.1,Orysa4|Os12g31620.1,Orysa4|Os10g04674.1  
AT1G58602.1  
AT3G14460.1  
AT1G59218.1,AT1G58848.1  
Orysa4|Os07g26730.1,Orysa4|Os11g45160.1,Orysa4|Os11g45130.1  
Orysa4|Os11g17014.1,Orysa4|Os03g26260.1,Orysa4|Os07g31800.1,Orysa4|Os01g70080.1  
Orysa4|Os05g31530.1,Orysa4|Os06g05359.1  
Orysa4|Os11g12020.1  
Orysa4|Os06g17950.1,Orysa4|Os06g03500.1  
Orysa4|Os12g37290.1  
Orysa4|Os08g16450.1,Orysa4|Os02g38386.1  
Orysa4|Os03g50150.1  
Orysa4|Os04g02120.1  
Orysa4|Os01g35300.1  
Orysa4|Os12g30590.1,Orysa4|Os09g20040.1,Orysa4|Os08g43010.1,Orysa4|Os02g30150.1,Orysa4|Os04g53030.1,Orysa4|Os04g30930.1,Orysa4|Os09g20030.1,Orysa4|Os05g31550.1,Orysa4|Os06g20050.1,Orysa4|Os01g33684.1,Orysa4|Os02g18140.1,Orysa4|Os02g18070.1,Orysa4|Os05g12570.1,Orysa4|Os04g30690.1,Orysa4|Os11g29520.1,Orysa4|Os09g20020.1,Orysa4|Os05g31570.1,Orysa4|Os11g24170.1,Orysa4|Os04g11430.1,Orysa4|Os02g16060.1,Orysa4|Os06g41670.1,Orysa4|Os02g02640.1,Orysa4|Os04g30530.1,Orysa4|Os06g45690.1,Orysa4|Os04g30610.1,Orysa4|Os02g02670.1,Orysa4|Os06g41480.1,Orysa4|Os06g41640.1,Orysa4|Os06g15750.1,Orysa4|Os04g30660.1  
Orysa4|Os03g48370.1,Orysa4|Os09g11020.1,Orysa4|Os07g29820.1,Orysa4|Os07g29810.1,Orysa4|Os11g47780.1,Orysa4|Os01g05600.1,Orysa4|Os11g28950.1,Orysa4|Os01g05620.1,Orysa4|Os11g44960.1,Orysa4|Os02g25900.1,Orysa4|Os05g12770.1,Orysa4|Os09g14410.1,Orysa4|Os11g44970.1,Orysa4|Os11g45180.1,Orysa4|Os09g13820.1,Orysa4|Os10g25487.1,Orysa4|Os11g45090.1,Orysa4|Os11g13940.1,Orysa4|Os10g33440.1,Orysa4|Os11g45190.1,Orysa4|Os05g16200.1,Orysa4|Os11g45060.1  
Orysa4|Os01g25810.1,Orysa4|Os03g20840.1,Orysa4|Os01g72390.1,Orysa4|Os08g43000.1,Orysa4|Os03g40194.1,Orysa4|Os10g04060.1,Orysa4|Os10g04090.1,Orysa4|Os08g43050.1  
Orysa4|Os08g15880.1,Orysa4|Os11g44990.1,Orysa4|Os09g14450.1,Orysa4|Os08g24380.1,Orysa4|Os11g40780.1  
Orysa4|Os02g16250.1,Orysa4|Os08g20000.1,Orysa4|Os01g02250.1,Orysa4|Os11g30210.1,Orysa4|Os04g53160.1,Orysa4|Os03g36920.1,Orysa4|Os12g29690.1,Orysa4|Os11g29970.1,Orysa4|Os04g22090.1,Orysa4|Os02g

16270.1,Orysa4|Os11g35210.1,Orysa4|Os12g29710.1,Orysa4|Os06g49360.1,Orysa4|Os07g04900.1,Orysa4|Os08g19980.1,Orysa4|Os11g15700.1,Orysa4|Os06g49420.1,Orysa4|Os06g49380.1,Orysa4|Os12g10180.1,Orysa4|Os04g43340.1,Orysa4|Os01g57280.1,Orysa4|Os04g52970.1,Orysa4|Os02g16330.1,Orysa4|Os05g34230.1,Orysa4|Os04g53050.1  
Orysa4|Os05g23990.1,Orysa4|Os11g10610.1,Orysa4|Os11g10550.1,Orysa4|Os11g10770.1,Orysa4|Os11g30010.1,Orysa4|Os11g29980.1,Orysa4|Os12g10330.1,Orysa4|Os07g33690.1,Orysa4|Os11g29990.1,Orysa4|Os11g29920.1,Orysa4|Os12g32670.1,Orysa4|Os10g04120.1,Orysa4|Os02g20460.1,Orysa4|Os08g42930.1  
Orysa4|Os12g32710.1,Orysa4|Os12g32790.1  
Orysa4|Os11g30050.1,Orysa4|Os03g38330.1,Orysa4|Os03g38250.1,Orysa4|Os11g30110.1,Orysa4|Os12g03080.1,Orysa4|Os07g33740.1  
Orysa4|Os12g10710.1,Orysa4|Os04g02110.1  
Orysa4|Os12g29290.1,Orysa4|Os12g29280.1,Orysa4|Os10g07400.1  
Orysa4|Os04g25900.1,Orysa4|Os11g44580.1  
Orysa4|Os12g10460.1  
Orysa4|Os04g41370.1,Orysa4|Os11g42090.1,Orysa4|Os05g50780.1,Orysa4|Os11g42070.1  
Orysa4|Os07g10560.1,Orysa4|Os10g36270.1,Orysa4|Os09g14490.1,Orysa4|Os02g16260.1,Orysa4|Os07g33720.1  
Orysa4|Os10g36280.1  
Orysa4|Os11g40160.1  
Orysa4|Os02g20480.1  
Orysa4|Os11g30060.1,Orysa4|Os07g17250.1,Orysa4|Os07g33730.1  
Orysa4|Os11g45600.1  
Orysa4|Os02g16100.1  
Orysa4|Os11g12000.1,Orysa4|Os11g45330.1,Orysa4|Os11g12330.1,Orysa4|Os12g14330.1,Orysa4|Os11g12240.1,Orysa4|Os08g32880.1,Orysa4|Os04g14220.1,Orysa4|Os11g12350.1,Orysa4|Os11g42040.1,Orysa4|Os11g11960.1,Orysa4|Os01g33810.1,Orysa4|Os11g12050.1,Orysa4|Os08g05800.1,Orysa4|Os11g12340.1,Orysa4|Os11g12260.1,Orysa4|Os04g02860.1,Orysa4|Os08g16120.1  
Orysa4|Os02g27710.1,Orysa4|Os06g17920.1,Orysa4|Os08g42700.1,Orysa4|Os08g42670.1,Orysa4|Os06g17900.1,Orysa4|Os08g32890.1,Orysa4|Os02g27540.1,Orysa4|Os06g17880.1,Orysa4|Os12g09710.1,Orysa4|Os09g34160.1  
Orysa4|Os06g30430.1,Orysa4|Os11g12300.1,Orysa4|Os11g45620.1,Orysa4|Os11g12040.1,Orysa4|Os11g11770.1,Orysa4|Os11g11950.1,Orysa4|Os08g09110.1,Orysa4|Os11g11990.1,Orysa4|Os09g34150.1  
Orysa4|Os06g48990.1  
Orysa4|Os08g19694.1  
AT3G17970.1 Orysa4|Os03g50010.1  
AT5G09420.1 Orysa4|Os02g51810.1  
AT1G08980.1 Orysa4|Os04g02754.1,Orysa4|Os04g02780.1  
AT1G24120.1 Orysa4|Os02g50760.1,Orysa4|Os06g13060.1  
AT1G68370.1 Orysa4|Os01g32870.1  
AT1G59980.1  
AT3G22270.1,AT4G14990.1 Orysa4|Os02g31220.1,Orysa4|Os01g56300.1  
AT1G79090.1  
AT4G38600.1 Orysa4|Os02g01170.1  
AT5G02880.1 Orysa4|Os05g03100.1  
Orysa4|Os05g38830.1  
AT5G24520.1,AT3G26640.1,AT1G12910.1 Orysa4|Os02g45810.1  
Orysa4|Os02g32430.1  
AT1G34320.1 Orysa4|Os01g65330.1,Orysa4|Os05g35530.1  
AT1G30755.1  
AT5G08660.1  
Orysa4|Os10g27090.1  
Orysa4|Os02g34650.1  
Orysa4|Os11g07840.1  
Orysa4|Os06g50220.1  
Orysa4|Os04g35410.1  
AT5G47620.1,AT1G17640.1,AT4G14300.1,AT3G26420.1,AT3G13224.2,AT1G58470.1,AT3G23830.1,AT1G60650.1,AT2G33410.1,AT4G26650.1,AT4G13850.1,AT5G55550.3,AT3G07810.2  
Orysa4|Os11g41890.1,Orysa4|Os01g56110.1,Orysa4|Os02g12850.1,Orysa4|Os01g71770.1,Orysa4|Os07g39560.1,Orysa4|Os10g33230.1,Orysa4|Os07g08960.1,Orysa4|Os03g61990.1,Orysa4|Os06g37000.1,Orysa4|Os07g03240.1,Orysa4|Os01g68790.1,Orysa4|Os03g47800.1  
AT2G37510.1 Orysa4|Os03g17060.1  
AT5G06210.1 Orysa4|Os04g33810.1  
AT5G54580.1 Orysa4|Os08g04440.1,Orysa4|Os07g36490.1  
AT4G36960.1  
AT5G04280.1  
AT3G08000.1  
AT2G27330.1  
AT1G73530.1  
Orysa4|Os08g38410.1  
Orysa4|Os01g56120.1  
Orysa4|Os08g23120.1  
AT1G23900.1,AT1G60070.1 Orysa4|Os02g56110.1,Orysa4|Os06g07090.1  
AT1G31730.1 Orysa4|Os01g68750.1  
AT1G23940.1  
AT3G22110.1 Orysa4|Os06g07878.1,Orysa4|Os06g07140.1,Orysa4|Os06g07978.1  
Orysa4|Os07g28590.1  
AT2G46760.1,AT2G46740.1,AT1G32300.1,AT5G56490.1,AT2G46750.1  
Orysa4|Os08g02230.1,Orysa4|Os03g36530.1,Orysa4|Os02g03200.1,Orysa4|Os02g03210.1  
AT5G11540.1 Orysa4|Os01g49360.1  
AT5G56470.1  
Orysa4|Os04g29210.1  
Orysa4|Os08g40720.1



AT4G27280.1,AT5G54490.1 Orysa4|Os06g46950.1,Orysa4|Os01g57470.1  
AT2G46600.1  
AT5G04290.1 Orysa4|Os05g43060.1  
AT2G34210.1,AT4G08350.1 Orysa4|Os06g10620.1  
AT4G08360.1  
Orysa4|Os02g53230.1  
AT3G06040.1 Orysa4|Os02g10540.1  
AT4G37660.1 Orysa4|Os07g43310.1  
AT1G70190.1 Orysa4|Os05g48050.1  
AT2G03130.1  
Orysa4|Os03g52400.1  
AT1G19250.1,AT5G45180.1 Orysa4|Os03g08410.1  
Orysa4|Os04g14710.1,Orysa4|Os09g37650.1,Orysa4|Os06g10170.1,Orysa4|Os09g37690.1,Orysa4|Os09g37620.1,Orysa4|Os04g14690.1  
Orysa4|Os06g10190.1  
Orysa4|Os06g10180.1  
AT3G53430.1,AT5G60670.1,AT2G37190.1 Orysa4|Os02g47140.1,Orysa4|Os04g50990.1  
AT3G16630.1 Orysa4|Os05g06280.1  
AT1G06960.1,AT2G30260.1 Orysa4|Os03g18720.1  
AT4G15885.1  
AT2G47580.1  
AT5G17060.1,AT3G03120.1 Orysa4|Os02g47110.1,Orysa4|Os10g42940.1  
AT3G62290.1,AT2G47170.1,AT1G23490.1,AT1G70490.1,AT1G10630.1  
Orysa4|Os05g41060.1,Orysa4|Os01g16030.1,Orysa4|Os01g59790.1  
AT2G18390.1 Orysa4|Os02g22140.1  
AT3G22950.1 Orysa4|Os11g37640.1  
AT5G67560.1,AT3G49870.1 Orysa4|Os03g10370.1  
AT5G37680.1 Orysa4|Os02g49980.1  
AT2G24765.1 Orysa4|Os08g15040.1  
AT5G52210.1 Orysa4|Os03g27450.1,Orysa4|Os07g42820.1  
AT2G15310.1  
AT5G14670.1  
AT3G49860.1  
Orysa4|Os06g02390.1  
Orysa4|Os07g12200.1,Orysa4|Os07g12170.1  
AT1G45249.1,AT3G19290.1 Orysa4|Os02g52780.1,Orysa4|Os09g28310.1,Orysa4|Os06g10880.1  
AT4G34000.3,AT1G49720.1  
AT1G50660.1,AT3G20350.1 Orysa4|Os04g53350.1,Orysa4|Os05g41910.1  
AT1G64690.1 Orysa4|Os10g41300.1  
AT1G11690.1  
Orysa4|Os07g01230.1  
Orysa4|Os08g09170.1  
AT5G56750.1,AT2G19620.1  
Orysa4|Os01g09670.1,Orysa4|Os06g36740.1,Orysa4|Os05g10740.1,Orysa4|Os02g13150.1  
AT5G11790.1  
AT3G48860.2,AT5G23700.1 Orysa4|Os01g70320.1  
AT4G08630.1  
AT5G13260.1  
AT4G25070.1  
Orysa4|Os11g31960.1  
Orysa4|Os05g05580.1  
AT3G58630.1 Orysa4|Os01g48320.1,Orysa4|Os05g48690.1  
AT3G14180.1 Orysa4|Os02g35690.1  
AT5G05550.2  
AT1G54060.1  
AT3G11100.1  
AT1G04920.1 Orysa4|Os01g69030.1  
Orysa4|Os11g12820.1  
AT4G16120.1,AT3G20580.1,AT5G49270.1,AT3G16860.1 Orysa4|Os03g18910.1,Orysa4|Os07g49080.1  
Orysa4|Os06g47110.1  
AT3G63450.1 Orysa4|Os12g02970.1,Orysa4|Os11g03220.1  
AT1G78240.1 Orysa4|Os02g51860.1  
AT4G14360.1,AT3G23300.1,AT1G04430.1 Orysa4|Os10g33720.1  
AT1G26850.1 Orysa4|Os09g24900.1  
AT4G10440.1,AT1G33170.1 Orysa4|Os10g36690.1,Orysa4|Os06g01450.1  
AT3G10200.1,AT5G04060.1 Orysa4|Os05g31480.1  
AT2G40280.1 Orysa4|Os05g39520.1,Orysa4|Os01g61250.1  
AT4G00750.1,AT2G45750.1 Orysa4|Os02g45310.1,Orysa4|Os04g48230.1  
AT1G19430.1 Orysa4|Os03g56380.1  
AT5G06050.1,AT2G39750.1 Orysa4|Os01g62800.1  
AT2G03480.1,AT1G13860.1  
AT5G14430.1  
AT4G18030.1  
AT1G31850.1,AT4G19120.1  
AT2G43200.1  
AT3G56080.1  
AT1G77260.1  
AT3G03370.1  
Orysa4|Os10g41970.1  
Orysa4|Os03g26200.1  
Orysa4|Os11g38860.1  
Orysa4|Os10g37770.1

Orysa4|Os06g03750.1  
AT2G03890.1,AT1G26270.1,AT1G13640.1 Orysa4|Os09g29890.1,Orysa4|Os06g17290.1  
Orysa4|Os04g57300.1  
Orysa4|Os08g38200.1  
AT1G49470.1 Orysa4|Os08g36040.1  
AT5G39510.1 Orysa4|Os01g51120.1,Orysa4|Os01g37980.1  
AT5G39630.1  
AT3G29100.1  
AT1G26670.1  
AT2G43040.1 Orysa4|Os12g37780.1,Orysa4|Os11g46230.1  
AT1G27460.1 Orysa4|Os03g10350.1  
AT4G28600.1 Orysa4|Os10g33290.1,Orysa4|Os03g04500.1  
AT5G60970.1,AT5G08070.1,AT3G02150.2 Orysa4|Os01g55750.1  
AT4G00234.1,AT4G00290.1 Orysa4|Os02g45690.1,Orysa4|Os04g48940.1  
AT2G39770.1 Orysa4|Os03g16150.1,Orysa4|Os01g62840.1,Orysa4|Os08g13930.1  
AT3G55590.1  
AT4G30570.1  
AT2G28420.1 Orysa4|Os07g46360.1  
AT1G15380.1,AT1G80160.1 Orysa4|Os05g07940.1,Orysa4|Os01g07850.1  
AT4G08685.1 Orysa4|Os10g22590.1  
AT1G78040.1  
Orysa4|Os09g39950.1,Orysa4|Os04g32680.1  
AT4G29600.1,AT2G19570.1,AT4G29610.1 Orysa4|Os01g51540.1,Orysa4|Os06g40910.1  
AT4G29580.1,AT4G29640.1,AT4G29650.1,AT4G29570.1,AT4G29620.1,AT4G29630.1  
AT4G25835.1,AT5G57480.1,AT4G30250.1 Orysa4|Os09g26260.1  
AT3G28540.1,AT5G40010.1,AT3G28580.1,AT3G28510.1  
Orysa4|Os12g24320.1,Orysa4|Os12g44190.1,Orysa4|Os12g44210.1  
AT3G50940.1,AT3G50930.1 Orysa4|Os01g42030.1,Orysa4|Os05g51130.1  
AT3G28600.1,AT3G28570.1,AT5G40000.1,AT3G28610.1  
AT3G28520.1  
AT3G28560.1  
AT5G17750.1,AT5G17740.1,AT2G18193.1,AT5G17760.1,AT5G17730.1  
AT1G43910.1,AT4G05380.1,AT2G18190.1  
AT4G05370.1  
AT4G05340.1  
AT3G29800.1  
Orysa4|Os09g27340.1  
Orysa4|Os12g28590.1,Orysa4|Os12g28710.1,Orysa4|Os12g28137.1,Orysa4|Os12g28460.1,Orysa4|Os12  
g28177.1  
Orysa4|Os06g48240.1,Orysa4|Os06g48250.1  
Orysa4|Os07g09420.1,Orysa4|Os07g09470.1,Orysa4|Os03g58790.1,Orysa4|Os07g09490.1,Orysa4|Os01  
g19260.1,Orysa4|Os07g09480.1  
Orysa4|Os04g34699.1,Orysa4|Os12g44220.1  
Orysa4|Os07g33390.1,Orysa4|Os07g33410.1  
AT1G26820.1,AT2G02990.1,AT1G14220.1 Orysa4|Os08g33710.1  
AT1G14210.1  
Orysa4|Os07g43670.1  
Orysa4|Os07g43640.1,Orysa4|Os07g43600.1  
Orysa4|Os09g36680.1,Orysa4|Os09g36700.1  
AT3G57080.1,AT2G41340.1 Orysa4|Os11g04730.1,Orysa4|Os12g04510.1  
AT3G22320.1 Orysa4|Os01g59140.1  
AT3G54490.1  
AT3G16680.1  
Orysa4|Os04g41040.1  
AT3G50780.1 Orysa4|Os12g40480.1,Orysa4|Os03g55950.1  
AT1G63850.1 Orysa4|Os04g49060.1  
AT2G13690.1 Orysa4|Os04g20920.1,Orysa4|Os07g15600.1  
AT5G60050.1  
Orysa4|Os12g08720.1  
AT5G22330.1 Orysa4|Os01g62040.1,Orysa4|Os07g08170.1  
AT3G49830.1,AT5G67630.1 Orysa4|Os06g08770.1  
Orysa4|Os07g39290.1  
AT2G47090.1,AT3G62240.1 Orysa4|Os05g19970.1  
Orysa4|Os01g38760.1,Orysa4|Os01g38690.1,Orysa4|Os07g43850.1,Orysa4|Os01g38710.1,Orysa4|Os07  
g43830.1,Orysa4|Os01g38700.1,Orysa4|Os07g43840.1,Orysa4|Os01g38780.1,Orysa4|Os01g38720.1  
AT3G05975.1 Orysa4|Os12g02700.1,Orysa4|Os06g32970.1,Orysa4|Os05g40400.1,Orysa4|Os11g02730.1  
AT3G54200.1  
AT4G36760.1 Orysa4|Os11g33330.1,Orysa4|Os11g33340.1,Orysa4|Os06g45360.1  
AT3G05350.1 Orysa4|Os07g10540.1  
AT2G28900.1 Orysa4|Os05g02060.1  
AT4G16160.2 Orysa4|Os03g19290.1  
Orysa4|Os01g19770.1  
AT3G52340.1,AT1G51420.1,AT2G35840.1 Orysa4|Os05g05270.1,Orysa4|Os01g27880.1,Orysa4|Os02g05030.1  
AT3G54270.1  
AT5G23750.1,AT3G48940.1 Orysa4|Os04g45070.1,Orysa4|Os02g42880.1  
AT2G45820.1,AT3G61260.1  
AT4G00670.1  
Orysa4|Os02g57840.1  
Orysa4|Os03g02040.1  
AT3G14750.1 Orysa4|Os07g32450.1  
AT1G55170.1 Orysa4|Os12g09089.1  
Orysa4|Os03g60360.1

Orysa4|Os08g33330.1  
AT2G33460.1,AT3G23380.1,AT2G20430.1,AT1G04450.1,AT4G28556.1 Orysa4|Os02g56580.1  
Orysa4|Os07g26480.1  
AT3G22850.1,AT5G43830.1 Orysa4|Os03g53270.1,Orysa4|Os03g58170.1  
AT5G19140.1 Orysa4|Os11g05050.1  
AT4G27450.1,AT3G15450.1  
AT5G10240.1,AT5G65010.2 Orysa4|Os06g15420.1  
AT3G47340.1  
Orysa4|Os03g18130.1  
AT3G29320.1 Orysa4|Os03g55090.1  
AT1G75130.1 Orysa4|Os05g33600.1,Orysa4|Os05g33590.1  
AT2G26710.1 Orysa4|Os01g29150.1,Orysa4|Os02g11020.1,Orysa4|Os06g39880.1  
AT5G24910.1,AT5G24900.1  
Orysa4|Os05g40384.1,Orysa4|Os12g02640.1,Orysa4|Os11g02710.1,Orysa4|Os07g48330.1  
AT5G52400.1 Orysa4|Os02g57810.1  
Orysa4|Os02g39764.1  
Orysa4|Os11g32790.1  
Orysa4|Os07g45290.1  
Orysa4|Os03g21400.1  
Orysa4|Os12g02630.1  
Orysa4|Os01g01020.1  
AT1G16520.1,AT1G56080.1 Orysa4|Os03g45760.1  
Orysa4|Os04g52570.1  
AT1G01090.1 Orysa4|Os04g02900.1  
AT1G24180.1,AT1G59900.1 Orysa4|Os02g50620.1,Orysa4|Os06g13720.1  
AT3G48890.1 Orysa4|Os10g35870.1  
AT5G52240.1  
Orysa4|Os02g42740.1  
AT4G14420.1 Orysa4|Os04g10240.1,Orysa4|Os10g30860.1,Orysa4|Os03g05520.1  
AT1G04340.1,AT5G43460.1  
AT3G23190.1  
AT3G23175.1  
AT3G23180.1  
AT3G52950.1,AT2G36500.1 Orysa4|Os11g06930.1,Orysa4|Os12g07190.1  
AT5G50640.1,AT5G50530.1,AT5G63490.1 Orysa4|Os01g69900.1  
Orysa4|Os01g73040.1  
Orysa4|Os11g30350.1  
AT3G56090.1,AT2G40300.1,AT5G01600.1,AT3G11050.1 Orysa4|Os12g01530.1  
AT1G75380.1,AT1G19660.1 Orysa4|Os08g26870.1  
AT5G66050.1  
Orysa4|Os01g50622.1  
AT4G29210.1 Orysa4|Os01g05820.1,Orysa4|Os01g05810.1  
AT4G39650.1,AT4G39640.1 Orysa4|Os04g38450.1  
AT1G69820.1  
AT5G11160.1,AT1G80050.1 Orysa4|Os02g40010.1,Orysa4|Os04g42520.1,Orysa4|Os07g30150.1  
AT1G27450.1 Orysa4|Os12g39860.1  
AT4G22570.1,AT4G12440.2  
Orysa4|Os12g40130.1  
AT1G73620.1,AT1G18250.2 Orysa4|Os06g47600.1  
AT5G40020.1 Orysa4|Os10g27280.1  
AT5G02140.1 Orysa4|Os11g47944.1  
AT4G36010.1,AT2G17860.1,AT1G75800.1 Orysa4|Os10g05660.1,Orysa4|Os09g36560.1,Orysa4|Os03g14050.1  
AT5G24620.1 Orysa4|Os09g32280.1,Orysa4|Os08g40600.1  
AT2G28790.1 Orysa4|Os01g62260.1  
AT4G38660.1 Orysa4|Os03g14030.1,Orysa4|Os10g05600.1  
AT1G19320.1,AT1G75040.1,AT1G75030.1,AT1G75050.1 Orysa4|Os03g13070.1  
AT1G77700.1 Orysa4|Os04g59370.1  
AT4G38670.1  
AT1G20030.2  
AT2G24810.1  
Orysa4|Os06g50240.1  
Orysa4|Os06g16990.1  
Orysa4|Os10g38100.1  
Orysa4|Os12g38150.1,Orysa4|Os11g47680.1,Orysa4|Os12g38170.1,Orysa4|Os11g47670.1  
Orysa4|Os08g43510.1  
Orysa4|Os02g02200.1  
AT5G27730.1 Orysa4|Os01g70550.1  
Orysa4|Os11g14080.1  
Orysa4|Os02g32504.1,Orysa4|Os11g34110.1,Orysa4|Os04g33200.1,Orysa4|Os05g06360.1  
AT1G74270.1,AT3G55750.1,AT1G07070.1,AT1G41880.1  
Orysa4|Os05g48310.1,Orysa4|Os05g48220.1,Orysa4|Os02g54470.1  
AT1G48830.1 Orysa4|Os05g27940.1,Orysa4|Os03g18580.1,Orysa4|Os03g18570.1  
AT3G02560.1,AT5G16130.1  
AT2G28520.1 Orysa4|Os01g61780.1  
AT2G21410.1,AT4G39080.1 Orysa4|Os03g14690.1,Orysa4|Os10g10500.1  
AT4G16070.1 Orysa4|Os01g20840.1  
AT3G14075.1 Orysa4|Os02g54010.1  
Orysa4|Os12g36770.1,Orysa4|Os03g61540.1  
Orysa4|Os05g22600.1  
AT1G22780.1,AT4G09800.1,AT1G34030.1 Orysa4|Os07g07709.1,Orysa4|Os03g58050.1  
Orysa4|Os07g07770.1  
AT2G31610.1,AT3G53870.1,AT5G35530.1 Orysa4|Os03g38000.1,Orysa4|Os07g41750.1

AT1G51690.1,AT1G17720.1 Orysa4|Os02g13110.1,Orysa4|Os06g36770.1,Orysa4|Os01g41630.1  
AT1G77870.1,AT1G22050.1 Orysa4|Os02g51500.1  
AT4G24990.1,AT3G26980.1 Orysa4|Os04g32270.1  
Orysa4|Os06g12020.1  
AT1G05200.1,AT2G32390.1 Orysa4|Os06g46670.1  
AT2G29110.1,AT2G29120.1,AT2G29100.1,AT2G24720.1  
Orysa4|Os09g25980.1,Orysa4|Os09g25960.1,Orysa4|Os09g25990.1,Orysa4|Os09g26000.1  
AT3G51480.1,AT1G42540.1 Orysa4|Os04g49570.1,Orysa4|Os02g02540.1  
AT2G32400.1  
AT5G27100.1,AT4G31710.1,AT2G24710.1,AT5G11210.1  
AT5G48410.1,AT5G48400.2  
AT5G11180.1  
AT4G35290.1,AT2G17260.1  
Orysa4|Os07g01310.1  
Orysa4|Os07g33790.1  
Orysa4|Os09g25930.1,Orysa4|Os02g54640.1  
Orysa4|Os06g09090.1,Orysa4|Os06g09120.1,Orysa4|Os06g08910.1,Orysa4|Os06g09130.1  
Orysa4|Os09g25940.1  
Orysa4|Os06g06130.1  
Orysa4|Os09g26144.1  
Orysa4|Os09g26160.1  
Orysa4|Os09g31160.1,Orysa4|Os06g13730.1  
AT2G04842.1 Orysa4|Os02g33500.1  
AT5G26830.1 Orysa4|Os08g19850.1  
AT1G17960.1  
AT1G18130.1  
AT1G23290.1,AT1G70600.1 Orysa4|Os07g42170.1,Orysa4|Os03g29460.1  
AT1G12960.1  
Orysa4|Os02g07890.1  
AT1G26930.1,AT1G14330.1,AT2G02870.1 Orysa4|Os03g07530.1  
AT5G60570.1 Orysa4|Os04g52830.1  
AT5G40680.1,AT3G27150.1  
Orysa4|Os11g38980.1  
AT4G13000.1,AT3G25250.1 Orysa4|Os02g39090.1,Orysa4|Os04g41160.1  
AT2G44830.1 Orysa4|Os02g43740.1,Orysa4|Os04g46180.1  
AT5G58140.1 Orysa4|Os04g23890.1  
AT3G44610.1 Orysa4|Os11g05320.1  
AT5G03640.1,AT3G52890.1,AT2G36350.1 Orysa4|Os12g29580.1  
AT2G34650.1 Orysa4|Os03g44020.1,Orysa4|Os12g42020.1  
AT1G16440.1,AT1G79250.1,AT3G12690.1 Orysa4|Os01g13270.1,Orysa4|Os05g14750.1  
AT3G45780.1 Orysa4|Os11g01140.1,Orysa4|Os12g01140.1  
AT5G47750.1 Orysa4|Os09g30150.1,Orysa4|Os08g38320.1,Orysa4|Os02g49310.1,Orysa4|Os09g08420.1  
AT2G26700.1 Orysa4|Os01g07940.1  
AT1G53700.1,AT3G14370.1 Orysa4|Os03g14840.1  
AT3G20830.1,AT1G51170.1 Orysa4|Os09g31210.1,Orysa4|Os08g39460.1  
AT3G27580.1  
AT4G26610.1,AT5G55910.1  
AT5G40030.1  
Orysa4|Os12g09630.1  
Orysa4|Os10g41290.1  
Orysa4|Os12g05394.1  
Orysa4|Os10g15160.1  
Orysa4|Os04g33500.1  
Orysa4|Os02g18430.1  
AT5G01220.1 Orysa4|Os07g01030.1  
Orysa4|Os01g04920.1  
Orysa4|Os03g15840.1  
AT2G35110.1 Orysa4|Os08g43130.1  
AT1G10590.3,AT1G23750.1 Orysa4|Os05g01050.1  
Orysa4|Os01g55030.1  
AT1G76720.1,AT1G76810.1 Orysa4|Os05g51500.1  
AT1G76820.1,AT1G21160.1  
AT2G27700.1,AT1G76825.1  
AT1G03370.1 Orysa4|Os06g19400.1  
AT5G50170.1  
Orysa4|Os08g38440.1  
Orysa4|Os06g40570.1,Orysa4|Os02g10630.1  
AT1G10320.1 Orysa4|Os02g35150.1  
AT1G27650.1,AT5G42820.1 Orysa4|Os09g31482.1,Orysa4|Os05g48960.1  
AT3G44785.1  
Orysa4|Os01g47750.1  
AT1G67730.1 Orysa4|Os02g38440.1,Orysa4|Os04g40730.1  
Orysa4|Os06g19540.1,Orysa4|Os06g19530.1,Orysa4|Os06g19500.1,Orysa4|Os06g19610.1,Orysa4|Os06g19550.1,Orysa4|Os04g02620.1,Orysa4|Os06g19590.1  
AT4G21610.1 Orysa4|Os01g42710.1  
AT1G32540.1 Orysa4|Os08g06280.1  
AT4G20380.2 Orysa4|Os12g41700.1,Orysa4|Os03g43840.1  
Orysa4|Os07g28910.1  
Orysa4|Os08g03610.1  
AT1G68530.1,AT1G25450.1 Orysa4|Os03g12030.1  
AT1G01120.1 Orysa4|Os10g07010.1,Orysa4|Os03g14170.1  
AT1G19440.1 Orysa4|Os05g49290.1

AT1G07720.1,AT2G28630.1  
Orysa4|Os03g26530.1,Orysa4|Os02g56860.1,Orysa4|Os10g33370.1,Orysa4|Os03g26620.1  
AT2G26250.1 Orysa4|Os03g08360.1  
AT5G49070.1  
AT1G71160.1  
AT4G34510.1,AT2G16280.1  
AT4G34250.1,AT4G34520.1,AT2G15090.1  
AT5G04530.1  
AT3G52160.1  
Orysa4|Os06g15250.1,Orysa4|Os01g34560.1,Orysa4|Os06g14810.1,Orysa4|Os06g15020.1,Orysa4|Os06  
g15170.1,Orysa4|Os02g49920.1  
Orysa4|Os04g02640.1  
Orysa4|Os03g13630.1  
Orysa4|Os09g34930.1  
Orysa4|Os01g21620.1  
AT3G61060.2,AT1G12710.1 Orysa4|Os09g35680.1,Orysa4|Os04g48270.1,Orysa4|Os03g02550.1  
Orysa4|Os02g13160.1  
AT4G02430.2,AT1G02840.1 Orysa4|Os05g30140.1,Orysa4|Os07g47630.1  
AT1G09140.1  
Orysa4|Os01g21420.1  
AT2G25490.1,AT5G25350.1 Orysa4|Os06g40360.1,Orysa4|Os02g10700.1  
AT1G20990.1 Orysa4|Os09g31980.1  
AT2G16050.1 Orysa4|Os12g40470.1  
AT2G37780.1  
Orysa4|Os08g31250.1,Orysa4|Os08g31170.1,Orysa4|Os08g31280.1,Orysa4|Os08g30590.1,Orysa4|Os09  
g20150.1  
Orysa4|Os01g68460.1  
AT2G27980.1,AT2G36720.1 Orysa4|Os06g51450.1,Orysa4|Os06g01170.1  
AT2G37520.1,AT3G53680.1  
AT1G59610.1,AT1G10290.1 Orysa4|Os06g13820.1,Orysa4|Os02g50550.1  
Orysa4|Os10g10580.1,Orysa4|Os03g52230.1  
Orysa4|Os08g32920.1  
Orysa4|Os10g40770.1  
AT1G01370.1 Orysa4|Os05g41080.1  
AT5G10390.1 Orysa4|Os01g64640.1  
AT4G40030.1 Orysa4|Os03g27310.1  
AT5G10400.1  
AT5G12910.1  
AT5G65360.1  
AT3G27360.1  
AT5G65350.1  
AT1G09200.1  
AT1G13370.1  
AT1G19890.1  
AT5G10980.1  
AT4G40040.1  
AT1G75600.1  
Orysa4|Os12g22650.1,Orysa4|Os12g22680.1  
Orysa4|Os06g06480.1  
Orysa4|Os05g36280.1  
Orysa4|Os11g05730.1  
Orysa4|Os04g34240.1  
Orysa4|Os06g06460.1  
Orysa4|Os06g06510.1  
Orysa4|Os02g25940.1  
Orysa4|Os06g04030.1  
AT3G17020.1 Orysa4|Os05g06500.1  
Orysa4|Os01g07590.1,Orysa4|Os05g07810.1  
Orysa4|Os01g63010.1  
AT5G58000.1 Orysa4|Os05g32430.1  
AT3G15330.1,AT2G04930.1,AT5G54210.1,AT1G43610.1,AT1G43600.1,AT5G23470.1,AT2G02290.1,AT3G17550.1,A  
T3G19600.1,AT1G20320.1  
AT3G50376.1  
Orysa4|Os02g55280.1  
AT5G47020.1 Orysa4|Os04g10380.1  
AT5G11700.1,AT4G32920.1 Orysa4|Os05g09360.1,Orysa4|Os01g09246.1  
AT2G21190.1,AT4G38790.1 Orysa4|Os09g36370.1,Orysa4|Os08g43470.1  
AT1G19970.1,AT1G75760.1  
AT3G25160.1  
AT1G54580.1,AT5G27200.1,AT3G05020.1,AT1G54630.1  
Orysa4|Os03g63930.1,Orysa4|Os08g43580.1,Orysa4|Os09g36860.1  
AT3G22550.1 Orysa4|Os03g46260.1  
AT3G63210.1  
Orysa4|Os07g07900.1,Orysa4|Os10g28680.1  
AT3G19090.1 Orysa4|Os07g01260.1,Orysa4|Os03g36900.1  
AT5G46250.1 Orysa4|Os01g55170.1  
AT2G43970.1 Orysa4|Os12g12360.1  
Orysa4|Os08g42980.1  
AT1G27480.1 Orysa4|Os03g52010.1  
Orysa4|Os02g37770.1,Orysa4|Os03g13030.1,Orysa4|Os02g37710.1,Orysa4|Os02g37654.1,Orysa4|Os10  
g08026.1,Orysa4|Os02g37760.1,Orysa4|Os01g71800.1,Orysa4|Os02g37800.1  
Orysa4|Os10g08040.1,Orysa4|Os10g08018.1

Orysa4|Os02g37750.1,Orysa4|Os10g08050.1  
AT2G32440.1,AT1G05160.1 Orysa4|Os06g02019.1  
AT3G19270.1 Orysa4|Os08g36860.1,Orysa4|Os09g28390.1  
AT5G05690.1 Orysa4|Os12g04480.1,Orysa4|Os11g04710.1  
AT3G13730.1 Orysa4|Os01g10040.1,Orysa4|Os05g11130.1  
AT5G45340.1,AT4G19230.2 Orysa4|Os02g47470.1  
AT1G12740.1 Orysa4|Os04g48170.1,Orysa4|Os02g45280.1  
AT1G19630.1 Orysa4|Os05g01120.1  
AT5G38970.1,AT3G30180.1 Orysa4|Os03g40540.1  
AT4G36380.1  
AT2G29090.1  
AT5G48000.1,AT3G44970.1,AT1G78490.1,AT1G55940.1  
AT4G15300.1,AT4G15393.1,AT3G30290.1,AT4G15396.1,AT4G15310.1  
Orysa4|Os10g23180.1,Orysa4|Os10g23160.1  
Orysa4|Os03g61980.1  
Orysa4|Os07g29960.1,Orysa4|Os03g45619.1,Orysa4|Os04g48210.1,Orysa4|Os04g48200.1  
Orysa4|Os10g19140.1,Orysa4|Os12g18820.1,Orysa4|Os10g10040.1  
Orysa4|Os10g19110.1  
AT1G08570.1 Orysa4|Os07g48510.1,Orysa4|Os03g21000.1  
AT4G26160.1 Orysa4|Os05g11090.1  
AT2G33270.1  
AT5G61440.1  
AT4G29670.2  
AT4G16146.1 Orysa4|Os12g24580.1,Orysa4|Os03g19220.1,Orysa4|Os01g19940.1  
AT5G64130.1 Orysa4|Os05g49160.1,Orysa4|Os01g14690.1  
AT1G69510.1  
Orysa4|Os01g47490.1  
AT2G47620.1 Orysa4|Os04g40420.1  
AT2G33610.1 Orysa4|Os02g10060.1  
AT5G65260.1,AT5G10350.1 Orysa4|Os06g11620.1,Orysa4|Os02g52140.1  
AT5G51120.1  
AT1G61010.1 Orysa4|Os03g63590.1  
AT2G01730.1 Orysa4|Os09g23380.1  
AT5G35840.1 Orysa4|Os03g54084.1  
AT1G09570.1 Orysa4|Os03g51030.1  
AT1G14250.1,AT2G02970.1,AT1G14230.1,AT1G14240.1 Orysa4|Os08g33850.1  
Orysa4|Os03g26080.1  
AT5G14180.1 Orysa4|Os08g41780.1  
Orysa4|Os04g21160.1,Orysa4|Os06g42860.1  
AT1G20760.1,AT1G21630.1 Orysa4|Os03g03830.1  
Orysa4|Os06g51250.1  
AT1G67330.1,AT1G27930.1 Orysa4|Os11g29780.1  
AT1G33800.1,AT1G71690.1,AT1G09610.1,AT4G09990.1 Orysa4|Os12g10320.1  
Orysa4|Os11g13870.1  
AT3G22490.1,AT3G22500.1 Orysa4|Os03g06360.1  
AT5G53270.1,AT5G27980.1,AT5G53260.1  
AT1G03120.1  
Orysa4|Os03g53610.1  
Orysa4|Os06g23350.1  
AT3G24590.1 Orysa4|Os02g16709.1  
AT2G30440.1,AT1G06870.1 Orysa4|Os09g28000.1,Orysa4|Os03g55640.1  
AT3G44150.1 Orysa4|Os03g44560.1  
AT3G11800.1  
AT2G15910.1  
AT3G48630.1  
Orysa4|Os03g57320.1  
AT4G34330.1,AT4G34320.1 Orysa4|Os10g21540.1,Orysa4|Os03g10240.1  
AT2G18630.1,AT5G66675.1  
AT3G28270.1,AT5G66670.1,AT5G66660.1  
AT3G57100.1  
AT2G24290.1,AT4G30996.1 Orysa4|Os04g42340.1  
AT1G18560.1 Orysa4|Os01g02100.1  
AT5G16450.1,AT3G02770.1  
Orysa4|Os01g52460.1,Orysa4|Os04g46690.1,Orysa4|Os01g58830.1,Orysa4|Os05g14940.1,Orysa4|Os05g12780.1,Orysa4|Os01g18650.1,Orysa4|Os05g50640.1,Orysa4|Os02g55620.1,Orysa4|Os11g39940.1,Orysa4|Os01g19210.1,Orysa4|Os10g02910.1,Orysa4|Os10g30680.1,Orysa4|Os06g24530.1,Orysa4|Os03g52310.1,Orysa4|Os04g53660.1,Orysa4|Os10g12140.1,Orysa4|Os06g10740.1,Orysa4|Os02g52430.1,Orysa4|Os07g28760.1,Orysa4|Os04g03000.1,Orysa4|Os12g33640.1,Orysa4|Os05g50624.1,Orysa4|Os02g14250.1,Orysa4|Os07g34230.1,Orysa4|Os02g52450.1,Orysa4|Os06g18860.1,Orysa4|Os05g51300.1,Orysa4|Os03g60730.1,Orysa4|Os01g33410.1,Orysa4|Os02g32170.1,Orysa4|Os02g25950.1,Orysa4|Os01g14190.1,Orysa4|Os03g14600.1,Orysa4|Os05g30590.1,Orysa4|Os03g36550.1,Orysa4|Os10g14230.1,Orysa4|Os10g34860.1,Orysa4|Os03g31110.1,Orysa4|Os01g60100.1,Orysa4|Os11g14470.1,Orysa4|Os10g08970.1,Orysa4|Os01g43010.1,Orysa4|Os08g08240.1  
AT5G56260.1  
Orysa4|Os02g48310.1,Orysa4|Os08g39520.1,Orysa4|Os12g29970.1,Orysa4|Os02g10280.1,Orysa4|Os08g25660.1,Orysa4|Os09g02890.1,Orysa4|Os08g34690.1,Orysa4|Os04g25210.1,Orysa4|Os04g25520.1,Orysa4|Os09g01300.1,Orysa4|Os05g25800.1,Orysa4|Os04g01100.1,Orysa4|Os04g09410.1,Orysa4|Os02g56350.1,Orysa4|Os08g17850.1,Orysa4|Os03g15830.1,Orysa4|Os06g37760.1  
Orysa4|Os06g29630.1,Orysa4|Os08g37120.1,Orysa4|Os01g50340.1,Orysa4|Os04g01110.1,Orysa4|Os03g28950.1,Orysa4|Os02g08340.1  
Orysa4|Os08g09880.1  
AT1G14530.1,AT2G02180.1 Orysa4|Os03g02850.1,Orysa4|Os10g39220.1  
AT4G21790.1 Orysa4|Os03g36790.1,Orysa4|Os07g01250.1

Orysa4|Os02g45870.1  
AT3G17800.1,AT1G48450.1 Orysa4|Os03g50870.1  
AT3G07310.1,AT5G48590.1 Orysa4|Os11g26890.1  
AT1G32160.1 Orysa4|Os04g50860.1  
AT1G56350.1 Orysa4|Os03g19300.1  
AT3G03300.1 Orysa4|Os03g38740.1,Orysa4|Os09g14610.1  
AT5G20320.1 Orysa4|Os04g43050.1  
AT2G19390.1,AT4G29790.1 Orysa4|Os05g28300.1  
AT5G22450.1 Orysa4|Os05g01690.1,Orysa4|Os01g73620.1  
AT5G16140.1,AT5G38290.2 Orysa4|Os01g04130.1  
AT1G18440.1 Orysa4|Os01g49900.1,Orysa4|Os05g47630.1  
AT5G19830.1  
AT2G39220.1,AT4G29800.1,AT3G54950.1 Orysa4|Os03g14950.1  
Orysa4|Os03g57080.1,Orysa4|Os03g43880.1,Orysa4|Os12g41720.1  
Orysa4|Os06g46350.1  
AT1G06690.1 Orysa4|Os07g05000.1,Orysa4|Os07g04990.1  
AT5G53580.1 Orysa4|Os10g37330.1  
AT1G08125.1 Orysa4|Os02g57330.1  
AT5G44170.1 Orysa4|Os05g48950.1  
AT2G44310.1 Orysa4|Os03g29770.1,Orysa4|Os11g30180.1  
AT1G54530.1  
Orysa4|Os09g31000.1,Orysa4|Os08g39290.1,Orysa4|Os09g31040.1,Orysa4|Os09g30506.1  
Orysa4|Os10g02680.1  
AT1G48930.1 Orysa4|Os04g57860.1  
AT5G49720.1,AT4G24260.1 Orysa4|Os03g21210.1,Orysa4|Os03g52630.1  
AT3G43860.1 Orysa4|Os02g53820.1  
AT1G19940.1,AT1G75680.1 Orysa4|Os09g36350.1  
AT1G64390.1,AT4G11050.1 Orysa4|Os01g12070.1,Orysa4|Os05g12150.1  
AT4G02290.1,AT1G02800.1 Orysa4|Os01g21070.1  
AT1G23210.1,AT1G70710.1 Orysa4|Os06g14540.1,Orysa4|Os02g50040.1  
AT4G09740.1,AT4G23560.1 Orysa4|Os08g29770.1  
AT2G32990.1 Orysa4|Os06g13830.1,Orysa4|Os02g50490.1,Orysa4|Os02g05744.1,Orysa4|Os08g32940.1  
AT4G38990.1,AT4G39010.1 Orysa4|Os09g36060.1  
AT2G44540.1,AT2G44560.1,AT2G44550.1  
AT3G42155.1  
AT4G39000.1  
Orysa4|Os04g41970.1  
Orysa4|Os12g24040.1,Orysa4|Os06g50140.1  
Orysa4|Os01g64140.1  
Orysa4|Os02g03120.1,Orysa4|Os08g02220.1  
AT5G64440.1 Orysa4|Os04g01250.1  
Orysa4|Os09g16580.1,Orysa4|Os11g06900.1,Orysa4|Os12g07150.1  
AT3G27540.1,AT3G01620.1,AT1G67880.1,AT1G12990.1,AT5G14480.1  
Orysa4|Os02g38160.1,Orysa4|Os02g38140.1,Orysa4|Os04g40150.1  
AT2G13290.1 Orysa4|Os12g41780.1  
AT3G26445.1  
AT5G55030.1 Orysa4|Os07g32760.1  
AT1G76380.2,AT1G20670.1 Orysa4|Os09g37760.1  
AT5G55040.1  
Orysa4|Os03g03870.1  
Orysa4|Os03g21450.1  
AT3G16950.1,AT4G16155.1 Orysa4|Os01g23610.1,Orysa4|Os05g06460.1  
AT4G00810.1,AT1G01100.1,AT5G47700.1 Orysa4|Os08g02340.1  
AT5G24510.1  
AT3G49460.1  
AT3G44590.1,AT2G27710.1,AT2G27720.1 Orysa4|Os05g37330.1,Orysa4|Os01g09510.1,Orysa4|Os02g32760.1  
AT3G28500.1,AT5G40040.1  
Orysa4|Os08g15180.1,Orysa4|Os07g28710.1  
AT1G58380.1,AT1G58983.1,AT1G58684.1,AT2G41840.1,AT1G59359.1,AT3G57490.1  
Orysa4|Os07g10660.1,Orysa4|Os03g59310.1  
AT4G01870.1 Orysa4|Os07g44410.1  
AT1G21680.1,AT1G21670.1 Orysa4|Os03g62370.1  
Orysa4|Os12g24330.1,Orysa4|Os03g19990.1,Orysa4|Os03g28980.1  
Orysa4|Os04g20930.1  
AT3G10740.1,AT5G26120.1 Orysa4|Os11g03730.1,Orysa4|Os11g03780.1,Orysa4|Os12g03470.1  
Orysa4|Os03g20420.1,Orysa4|Os07g48750.1  
Orysa4|Os12g03530.1  
Orysa4|Os12g03480.1  
AT5G12250.1 Orysa4|Os01g18050.1,Orysa4|Os01g59150.1  
AT5G05620.1,AT3G61650.1 Orysa4|Os05g06450.1  
AT5G62700.1,AT5G62690.1 Orysa4|Os03g01530.1  
AT4G14960.2,AT1G04820.1,AT1G50010.1 Orysa4|Os11g14220.1,Orysa4|Os03g51600.1  
AT5G19780.1,AT5G19770.1 Orysa4|Os07g38730.1  
AT1G75780.1  
AT5G23860.1  
AT2G29550.1  
AT1G64740.1  
Orysa4|Os05g34170.1  
Orysa4|Os06g07280.1  
Orysa4|Os06g46000.1,Orysa4|Os02g07060.1  
Orysa4|Os03g11970.1  
AT1G17455.1,AT1G72630.1 Orysa4|Os11g40610.1

AT2G06255.1  
AT2G40080.1,AT2G29950.1  
Orysa4|Os08g27870.1,Orysa4|Os08g27860.1  
AT1G31130.1,AT4G19950.1,AT5G44860.1 Orysa4|Os01g58620.1  
Orysa4|Os08g01590.1  
AT5G17770.1 Orysa4|Os01g59930.1,Orysa4|Os05g40990.1  
AT5G20080.1 Orysa4|Os01g07910.1  
AT3G48330.1 Orysa4|Os08g44280.1  
AT5G50240.1  
Orysa4|Os04g40540.1  
AT3G06670.1 Orysa4|Os01g23590.1  
AT5G49370.1  
AT5G49380.1  
Orysa4|Os05g06470.1  
AT5G47760.1 Orysa4|Os09g08660.1  
AT5G36790.1,AT5G36700.1 Orysa4|Os04g41340.1  
Orysa4|Os12g23150.1  
AT5G01510.1 Orysa4|Os01g04860.1  
AT5G49820.1 Orysa4|Os01g66350.1,Orysa4|Os05g34650.1  
AT2G23470.1  
AT3G10850.1 Orysa4|Os03g21460.1  
AT2G43430.1,AT1G06130.1,AT2G31350.1 Orysa4|Os09g34100.1  
AT3G27060.1 Orysa4|Os06g14620.1,Orysa4|Os06g03720.1  
AT3G23580.1  
AT5G40942.1  
AT1G67580.1 Orysa4|Os02g39010.1,Orysa4|Os04g41100.1  
AT1G18670.1,AT1G74330.1 Orysa4|Os07g40550.1  
AT1G54610.1 Orysa4|Os07g47180.1,Orysa4|Os01g26864.1,Orysa4|Os01g27020.1  
AT5G64960.1,AT5G10270.1 Orysa4|Os05g32360.1,Orysa4|Os01g72790.1  
AT5G63370.1  
AT5G39420.1,AT3G01085.1  
AT3G05050.1  
AT5G50860.1  
Orysa4|Os02g29070.1,Orysa4|Os10g06770.1,Orysa4|Os12g23950.1  
Orysa4|Os06g47880.1  
Orysa4|Os12g38860.1  
Orysa4|Os03g22700.1  
AT1G62050.1,AT3G24210.1,AT1G04780.1,AT3G04470.1 Orysa4|Os07g32790.1  
AT1G11740.1  
Orysa4|Os07g25470.1  
Orysa4|Os07g25460.1  
Orysa4|Os02g56530.1  
AT2G30370.1 Orysa4|Os05g39880.1,Orysa4|Os01g60900.1  
AT4G14723.1,AT3G22820.1 Orysa4|Os11g37190.1,Orysa4|Os03g06610.1  
AT5G02610.1,AT2G39390.1,AT3G09500.1,AT3G55170.1 Orysa4|Os02g30050.1,Orysa4|Os04g30730.1  
Orysa4|Os06g51530.1  
AT3G59220.1,AT2G43120.1 Orysa4|Os03g62790.1  
AT1G50590.1 Orysa4|Os09g31120.1  
AT3G59260.1  
Orysa4|Os08g27720.1  
AT2G23060.1,AT4G37580.1 Orysa4|Os03g55530.1,Orysa4|Os07g02540.1  
AT2G30090.1  
AT5G67430.1  
Orysa4|Os06g44100.1,Orysa4|Os02g08400.1  
Orysa4|Os03g10810.1  
AT2G17500.1,AT5G65980.1 Orysa4|Os09g38210.1,Orysa4|Os09g38130.1  
AT1G76530.1,AT1G76520.1,AT1G20925.1 Orysa4|Os09g31478.1  
AT5G06460.1,AT2G30110.1 Orysa4|Os11g01510.1  
Orysa4|Os12g01520.1,Orysa4|Os07g49230.1  
Orysa4|Os03g18380.1  
AT1G80410.1 Orysa4|Os01g43030.1  
Orysa4|Os07g07180.1  
AT2G35860.1,AT5G06390.1,AT3G11700.1,AT3G52370.1  
Orysa4|Os07g06680.1,Orysa4|Os03g57460.1,Orysa4|Os03g57490.1  
AT5G05650.1  
AT5G22800.1 Orysa4|Os06g13660.1  
AT1G50200.1 Orysa4|Os10g10244.1  
AT1G49930.1  
AT5G03340.1,AT3G09840.1,AT3G53230.1 Orysa4|Os03g05730.1,Orysa4|Os10g30580.1  
AT2G03670.1 Orysa4|Os04g42110.1  
AT2G45500.1 Orysa4|Os06g03940.1  
AT2G34560.2 Orysa4|Os01g48270.1,Orysa4|Os01g55260.1  
AT2G27600.1 Orysa4|Os01g04814.1  
AT5G08470.1 Orysa4|Os08g44240.1  
AT1G80350.1 Orysa4|Os01g49000.1  
AT3G01610.1 Orysa4|Os06g01980.1  
AT5G53540.1,AT4G27680.1 Orysa4|Os06g50050.1  
AT1G03000.1 Orysa4|Os04g52690.1  
AT3G27120.1  
AT1G08270.2  
Orysa4|Os08g31870.1  
Orysa4|Os05g31220.1



Orysa4|Os02g06490.1  
AT3G03900.1 Orysa4|Os07g38560.1  
AT4G39940.1  
Orysa4|Os11g41650.1  
AT5G28850.2,AT5G28900.1,AT1G54450.1 Orysa4|Os10g33680.1  
AT1G03960.1,AT5G44090.1  
Orysa4|Os02g09840.1  
AT3G25190.1,AT3G43660.1,AT1G76800.1,AT3G43630.1,AT1G21140.1 Orysa4|Os04g59020.1  
Orysa4|Os11g06310.1,Orysa4|Os02g43030.1  
Orysa4|Os04g45520.1  
AT5G52520.1 Orysa4|Os07g07060.1  
AT3G62120.1 Orysa4|Os12g25710.1  
AT5G10880.1  
AT4G34670.1,AT3G04840.1 Orysa4|Os02g18550.1,Orysa4|Os03g10340.1,Orysa4|Os12g21798.1  
AT5G37710.1 Orysa4|Os06g14490.1  
AT3G49050.1,AT4G00500.1  
Orysa4|Os03g50410.1  
AT3G11670.1 Orysa4|Os02g33580.1,Orysa4|Os04g34000.1  
AT4G00550.1 Orysa4|Os03g11560.1,Orysa4|Os03g16140.1  
Orysa4|Os11g05990.1  
AT5G10480.1 Orysa4|Os04g20280.1,Orysa4|Os01g05694.1  
Orysa4|Os01g05710.1,Orysa4|Os01g05720.1,Orysa4|Os01g05744.1  
Orysa4|Os01g05760.1,Orysa4|Os08g30340.1  
AT1G58200.1,AT5G10490.1 Orysa4|Os03g31839.1  
AT1G79740.1 Orysa4|Os01g12280.1  
AT3G13030.1,AT3G13020.1,AT3G13010.1 Orysa4|Os06g49050.1  
Orysa4|Os08g19870.1  
AT4G35490.1 Orysa4|Os10g32870.1  
AT1G32990.1 Orysa4|Os03g03020.1  
AT5G51610.1  
AT1G23820.1,AT1G70310.1 Orysa4|Os07g22600.1  
AT5G53120.1 Orysa4|Os06g33710.1,Orysa4|Os02g15550.1  
AT5G02380.1,AT3G09390.1 Orysa4|Os01g05650.1  
Orysa4|Os12g38300.1,Orysa4|Os03g17870.1,Orysa4|Os12g38064.1,Orysa4|Os12g38290.1,Orysa4|Os12g38270.1,Orysa4|Os12g38010.1  
Orysa4|Os01g74300.1  
Orysa4|Os05g02070.1  
AT5G23800.1,AT2G47220.1,AT1G11420.1,AT1G03300.1,AT3G62300.1,AT1G26540.1,AT2G47230.1  
Orysa4|Os11g19730.1  
AT3G06520.1,AT1G06340.1,AT1G09320.1 Orysa4|Os05g04180.1  
AT5G23770.1,AT5G23780.1  
AT4G31540.1 Orysa4|Os06g48330.1,Orysa4|Os02g05620.1  
AT5G03540.1 Orysa4|Os11g05880.1  
AT1G54090.1,AT1G72470.1,AT3G14090.1 Orysa4|Os09g26820.1,Orysa4|Os08g35470.1  
AT5G50380.1 Orysa4|Os02g30230.1,Orysa4|Os04g31330.1  
AT1G07000.1,AT5G58430.1 Orysa4|Os01g61180.1,Orysa4|Os05g39610.1  
AT5G13990.1,AT5G13150.1 Orysa4|Os12g06840.1,Orysa4|Os11g06700.1  
AT1G51640.1  
AT5G52340.1  
AT5G52350.1  
AT3G55150.1,AT1G07725.1,AT2G39380.1,AT3G09530.1,AT2G28640.1,AT5G59730.1  
AT2G28650.1  
AT5G61010.1  
Orysa4|Os11g43000.1,Orysa4|Os10g05050.1  
Orysa4|Os08g40840.1  
Orysa4|Os04g58870.1,Orysa4|Os04g58880.1  
Orysa4|Os12g01040.1  
Orysa4|Os01g67820.1,Orysa4|Os01g67810.1  
Orysa4|Os08g41820.1  
Orysa4|Os07g10940.1,Orysa4|Os07g10910.1  
Orysa4|Os06g08460.1  
Orysa4|Os01g28600.1,Orysa4|Os02g36619.1  
Orysa4|Os07g10970.1  
Orysa4|Os01g61190.1  
AT3G52660.1 Orysa4|Os11g04390.1,Orysa4|Os12g04180.1  
AT4G00830.1 Orysa4|Os10g06130.1,Orysa4|Os11g14430.1  
AT5G28390.1  
Orysa4|Os12g38800.1  
AT4G03110.1,AT2G47310.1,AT1G03457.2,AT4G16280.2  
Orysa4|Os07g46820.1,Orysa4|Os05g30980.1,Orysa4|Os09g03610.1,Orysa4|Os01g71200.1  
Orysa4|Os11g32820.1  
AT5G21170.1 Orysa4|Os03g20340.1,Orysa4|Os07g48790.1  
Orysa4|Os05g41220.1  
AT3G54190.1,AT2G38630.1 Orysa4|Os05g40410.1,Orysa4|Os01g60200.1  
Orysa4|Os02g06460.1,Orysa4|Os02g54090.1,Orysa4|Os12g31440.1  
AT4G27310.1,AT5G54470.1 Orysa4|Os08g08120.1  
AT3G21890.1  
AT1G51980.1,AT3G16480.1 Orysa4|Os05g44916.1,Orysa4|Os01g53700.1  
Orysa4|Os01g09560.1  
Orysa4|Os01g73550.1  
AT4G13170.1,AT3G24830.1,AT3G07110.2,AT5G48760.1 Orysa4|Os03g54890.1,Orysa4|Os07g01870.1  
Orysa4|Os03g54860.1

AT5G48540.1  
Orysa4|Os08g04240.1,Orysa4|Os03g16950.1,Orysa4|Os08g04210.1,Orysa4|Os03g16960.1,Orysa4|Os08  
g04250.1  
Orysa4|Os03g19840.1  
Orysa4|Os05g02200.1  
AT5G16730.1,AT4G27595.1,AT3G02930.1,AT1G65010.1  
Orysa4|Os04g37790.1,Orysa4|Os02g24270.1,Orysa4|Os02g36350.1,Orysa4|Os04g50204.1,Orysa4|Os03  
g08980.1,Orysa4|Os05g02820.1  
AT4G40020.1  
AT3G18660.2 Orysa4|Os01g65780.1  
AT4G33330.1 Orysa4|Os03g08600.1  
AT1G77130.1  
AT1G54940.1,AT1G08990.1  
Orysa4|Os02g35020.1  
AT2G18730.1,AT5G57690.1,AT4G30340.1 Orysa4|Os02g54650.1  
AT1G14640.1,AT1G14650.1 Orysa4|Os02g14780.1  
AT4G16200.1  
AT3G49130.1,AT5G12280.1,AT5G06520.1  
AT5G06890.1  
AT2G43960.1  
AT2G41070.1,AT3G56850.1 Orysa4|Os05g41070.1  
Orysa4|Os03g20650.1,Orysa4|Os07g48660.1  
AT1G65070.1 Orysa4|Os04g58410.1  
AT5G54090.1 Orysa4|Os10g36530.1  
AT2G19490.1 Orysa4|Os01g67510.1  
AT1G79050.1 Orysa4|Os03g43850.1  
AT3G10140.1 Orysa4|Os01g71690.1  
AT3G32920.1  
Orysa4|Os11g19720.1  
AT4G17410.1,AT5G47430.1 Orysa4|Os10g29560.1  
Orysa4|Os03g21700.1,Orysa4|Os03g21570.1,Orysa4|Os03g45730.1  
AT2G45770.1 Orysa4|Os01g72800.1  
AT5G03940.1 Orysa4|Os11g05556.1  
AT5G57110.1,AT4G29900.1 Orysa4|Os04g51610.1  
AT2G22950.1,AT4G37640.1 Orysa4|Os03g10640.1  
AT1G10130.1 Orysa4|Os03g52090.1  
AT2G41560.1,AT3G57330.1 Orysa4|Os12g04220.1,Orysa4|Os11g04460.1,Orysa4|Os05g41580.1  
AT1G07810.1 Orysa4|Os03g17310.1  
AT5G53010.1  
AT3G21180.1  
AT1G07670.1  
AT4G00900.1  
Orysa4|Os08g40530.1  
Orysa4|Os02g08010.1  
Orysa4|Os12g39660.1  
Orysa4|Os03g42020.1  
Orysa4|Os05g02940.1  
AT3G19230.1 Orysa4|Os03g08610.1  
AT3G05990.1  
Orysa4|Os09g28470.1  
AT2G44710.1 Orysa4|Os04g45930.1  
Orysa4|Os10g08570.1  
Orysa4|Os07g08320.1  
Orysa4|Os07g27110.1  
AT4G31985.1,AT3G02190.1 Orysa4|Os02g55390.1,Orysa4|Os06g08320.1,Orysa4|Os02g55370.1  
AT2G25210.1  
AT2G20760.1 Orysa4|Os06g51510.1,Orysa4|Os04g58240.1,Orysa4|Os07g27750.1  
AT2G40060.1,AT3G51890.1  
AT1G73460.1,AT3G17750.1,AT1G73450.1 Orysa4|Os03g51020.1  
AT2G40120.1 Orysa4|Os01g61620.1,Orysa4|Os05g39080.1  
AT5G02950.1,AT3G09670.1 Orysa4|Os05g38810.1  
AT3G27860.1  
AT3G54760.1  
Orysa4|Os12g44130.1,Orysa4|Os07g49380.1  
Orysa4|Os05g03110.1,Orysa4|Os05g38800.1  
Orysa4|Os11g19810.1  
AT4G37100.1,AT5G66950.1,AT2G23520.1 Orysa4|Os12g40010.1,Orysa4|Os03g55704.1  
AT5G51920.1 Orysa4|Os08g43180.1  
AT4G22980.1  
AT5G60580.2,AT3G09760.1 Orysa4|Os02g06920.1,Orysa4|Os06g46366.1  
AT3G06330.1,AT5G18760.1  
AT5G03180.1  
Orysa4|Os06g23274.1  
AT2G22170.1,AT4G39730.1  
Orysa4|Os04g38360.1,Orysa4|Os02g51710.1,Orysa4|Os06g11810.1,Orysa4|Os04g38390.1,Orysa4|Os04  
g38370.1  
AT5G65158.1  
Orysa4|Os10g21790.1,Orysa4|Os10g21670.1  
AT1G27600.1 Orysa4|Os10g13810.1  
AT2G37090.1 Orysa4|Os05g03174.1,Orysa4|Os03g17850.1  
Orysa4|Os04g01280.1  
Orysa4|Os01g48440.1

Orysa4|Os07g49370.1  
Orysa4|Os01g06450.1  
AT5G13300.1 Orysa4|Os08g42530.1,Orysa4|Os09g33600.1  
AT1G10870.1,AT1G60860.1 Orysa4|Os02g42134.1  
AT5G61980.1  
AT1G30580.1 Orysa4|Os08g09940.1  
AT1G56050.1 Orysa4|Os03g56840.1  
AT4G25630.1,AT5G52470.1 Orysa4|Os02g57590.1  
AT5G52490.1  
AT1G80450.1 Orysa4|Os04g55240.1  
AT2G33780.1,AT1G28280.1 Orysa4|Os01g54400.1,Orysa4|Os05g44270.1  
AT5G53830.1,AT3G15300.1  
AT5G08480.2  
AT3G13510.1,AT5G56530.1,AT1G55360.1 Orysa4|Os03g59240.1,Orysa4|Os07g38590.1  
AT1G70550.1,AT1G10750.1,AT1G23340.1,AT5G50150.1 Orysa4|Os01g07570.1,Orysa4|Os06g28000.1  
AT2G44220.1,AT2G44210.2,AT2G44240.1  
AT2G20170.1,AT4G23360.1,AT4G23390.1,AT4G23370.1  
AT2G27320.1,AT5G18460.1,AT2G38255.1,AT5G60380.1,AT2G35250.1,AT4G17505.1  
AT2G24950.1,AT1G10190.1,AT4G15053.1,AT4G15050.1,AT4G10210.1  
AT3G48230.1  
AT5G25415.1  
AT5G46200.1  
AT2G44250.1  
Orysa4|Os01g74160.1,Orysa4|Os06g16640.1,Orysa4|Os01g37000.1  
Orysa4|Os07g08240.1  
Orysa4|Os11g10920.1  
Orysa4|Os01g37020.1,Orysa4|Os04g12639.1  
Orysa4|Os05g07764.1  
Orysa4|Os01g36660.1  
AT4G37180.2 Orysa4|Os12g39640.1,Orysa4|Os03g55590.1,Orysa4|Os07g02800.1  
AT1G13300.1,AT3G25790.1,AT1G25550.1,AT1G68670.1 Orysa4|Os02g22020.1  
AT1G49560.1  
AT5G08415.1 Orysa4|Os01g56310.1,Orysa4|Os05g43576.1  
AT2G20860.1 Orysa4|Os04g38330.1  
AT4G26190.1 Orysa4|Os03g54870.1,Orysa4|Os07g01850.1  
AT3G29760.1  
AT2G36540.1,AT2G36550.1  
Orysa4|Os03g54850.1  
AT4G08920.1 Orysa4|Os04g37920.1,Orysa4|Os02g36380.1  
AT1G04400.1 Orysa4|Os02g41550.1  
AT5G12980.1,AT3G20800.1 Orysa4|Os04g52340.1,Orysa4|Os03g57130.1,Orysa4|Os07g37790.1  
AT2G32550.1  
Orysa4|Os02g19420.1,Orysa4|Os02g19880.1  
AT4G32180.1 Orysa4|Os09g36270.1  
AT1G60440.1  
Orysa4|Os06g10520.1  
AT3G63490.1 Orysa4|Os05g32220.1  
AT2G42710.1 Orysa4|Os06g35470.1  
AT3G46230.1,AT1G53540.1,AT5G59720.1  
Orysa4|Os03g15960.1,Orysa4|Os01g04370.1,Orysa4|Os01g04380.1,Orysa4|Os03g16030.1,Orysa4|Os03g16020.1,Orysa4|Os03g16040.1  
AT1G52560.1 Orysa4|Os02g10710.1  
AT4G10250.1 Orysa4|Os04g36750.1  
AT1G54050.1 Orysa4|Os02g54140.1  
AT4G27670.1 Orysa4|Os03g14180.1  
AT5G12030.1,AT5G12020.1 Orysa4|Os01g08860.1  
AT1G59860.1,AT1G07400.1,AT2G29500.1  
AT2G19310.1  
AT4G21870.1  
Orysa4|Os02g48140.1  
Orysa4|Os02g03570.1  
Orysa4|Os01g04360.1  
Orysa4|Os01g04340.1  
Orysa4|Os01g04350.1  
Orysa4|Os11g13980.1  
Orysa4|Os03g61940.1  
Orysa4|Os02g12610.1  
AT3G52560.2,AT2G36060.2 Orysa4|Os09g12570.1  
AT1G70660.1,AT1G23260.1 Orysa4|Os03g50440.1  
Orysa4|Os12g41220.1  
Orysa4|Os04g58800.1  
AT3G60630.1,AT2G45160.1,AT4G00150.1  
Orysa4|Os04g46860.1,Orysa4|Os06g01620.1,Orysa4|Os02g44370.1,Orysa4|Os02g44360.1,Orysa4|Os10g40390.1  
AT4G36710.1  
AT1G10510.1 Orysa4|Os06g13050.1  
AT3G08980.1 Orysa4|Os04g08340.1  
AT1G53530.1 Orysa4|Os11g40500.1  
AT1G23465.1  
Orysa4|Os03g05430.1  
AT2G32230.1 Orysa4|Os04g59600.1  
Orysa4|Os02g17360.1

AT2G01070.1 Orysa4|Os11g34360.1  
AT1G61670.1 Orysa4|Os03g21690.1  
AT1G72480.1 Orysa4|Os09g26830.1  
AT1G10980.1  
Orysa4|Os07g42310.1  
AT1G68160.1,AT1G60670.1,AT1G10820.2,AT3G07565.3 Orysa4|Os04g44210.1,Orysa4|Os02g42020.1  
Orysa4|Os04g57700.1  
Orysa4|Os04g41830.1  
AT5G54760.1,AT4G27130.1,AT1G54290.1 Orysa4|Os05g41900.1  
AT5G54940.1  
Orysa4|Os01g58220.1  
AT3G13100.1,AT3G13080.1,AT3G13090.1 Orysa4|Os01g07870.1  
AT2G07680.1 Orysa4|Os06g08560.1  
AT3G60970.1,AT3G60160.1 Orysa4|Os04g49900.1  
AT3G21250.1 Orysa4|Os05g10730.1  
AT3G59140.1 Orysa4|Os06g06440.1  
AT2G47800.1,AT3G62700.1 Orysa4|Os01g25386.1  
AT2G34660.1,AT1G30400.1 Orysa4|Os04g52900.1  
AT1G04120.1 Orysa4|Os03g04920.1  
AT1G71330.1  
AT1G30410.1,AT1G30420.1  
Orysa4|Os02g18670.1  
Orysa4|Os02g18700.1,Orysa4|Os01g67580.1  
Orysa4|Os04g49890.1  
Orysa4|Os06g36650.1  
Orysa4|Os12g37580.1  
Orysa4|Os11g05700.1  
Orysa4|Os04g13210.1  
AT3G18290.1 Orysa4|Os01g49470.1  
AT1G18920.1,AT1G74770.1  
Orysa4|Os05g47780.1  
AT3G60340.1 Orysa4|Os10g41340.1,Orysa4|Os03g01150.1  
AT4G17483.1,AT4G17470.1,AT5G47330.1,AT4G17480.1,AT5G47340.1  
AT5G47350.1  
AT1G07540.1 Orysa4|Os03g16700.1  
AT3G53790.1,AT3G46590.2  
AT5G59430.1,AT3G12560.1  
AT5G13820.1  
AT2G30280.1 Orysa4|Os12g01940.1,Orysa4|Os11g01880.1  
AT2G44970.1 Orysa4|Os12g01930.1  
Orysa4|Os05g48416.1  
AT5G24860.1,AT5G10625.1,AT4G31380.1 Orysa4|Os01g15340.1,Orysa4|Os01g70730.1  
Orysa4|Os04g21350.1,Orysa4|Os02g26210.1  
Orysa4|Os03g22510.1  
AT3G28730.1 Orysa4|Os01g08970.1,Orysa4|Os05g08970.1  
AT1G12900.1,AT3G26650.1 Orysa4|Os04g38600.1  
AT5G58360.1,AT5G01840.1,AT2G30400.1,AT1G06920.1 Orysa4|Os05g25910.1  
Orysa4|Os01g60810.1,Orysa4|Os05g39950.1  
Orysa4|Os03g21870.1,Orysa4|Os07g48150.1,Orysa4|Os01g54570.1  
AT5G55620.1 Orysa4|Os02g15860.1,Orysa4|Os01g12190.1,Orysa4|Os06g33200.1  
AT5G06010.1,AT3G11405.1,AT3G55570.1,AT3G09950.1  
AT5G50915.1 Orysa4|Os08g42470.1,Orysa4|Os09g33580.1  
AT3G59060.3,AT2G43010.1 Orysa4|Os03g56950.1,Orysa4|Os12g41650.1  
AT1G10120.1,AT1G68920.1 Orysa4|Os03g12940.1,Orysa4|Os03g51910.1  
AT4G36930.1 Orysa4|Os02g56140.1,Orysa4|Os06g06900.1  
AT5G62610.1 Orysa4|Os03g58830.1  
AT2G18300.2,AT4G34530.1 Orysa4|Os02g47660.1  
AT3G07340.1,AT5G48560.1 Orysa4|Os01g68700.1,Orysa4|Os08g41320.1,Orysa4|Os09g32510.1  
AT1G18400.1  
AT5G61270.1  
AT1G59640.2  
AT3G23690.1  
AT1G25330.1  
Orysa4|Os12g40590.1  
Orysa4|Os09g29830.1,Orysa4|Os06g16400.1,Orysa4|Os08g38080.1  
Orysa4|Os04g28280.1  
AT4G21470.1 Orysa4|Os10g32730.1,Orysa4|Os10g14814.1  
Orysa4|Os01g55310.1  
AT2G38740.1 Orysa4|Os10g41930.1,Orysa4|Os09g24230.1  
Orysa4|Os06g01990.1  
AT4G10955.1,AT2G05260.1 Orysa4|Os02g18480.1  
AT5G24190.1,AT5G24210.1,AT5G24230.1,AT5G24220.1,AT5G24200.1,AT5G24180.1  
Orysa4|Os07g34400.1,Orysa4|Os07g34440.1  
Orysa4|Os01g52180.1  
AT5G02960.1 Orysa4|Os01g61820.1,Orysa4|Os03g60400.1  
AT3G09680.1  
Orysa4|Os05g13660.1  
AT2G43020.1,AT3G59050.1 Orysa4|Os04g53190.1  
AT1G65840.1 Orysa4|Os04g57560.1,Orysa4|Os04g57550.1  
AT1G63990.1 Orysa4|Os08g06050.1  
AT4G15440.1 Orysa4|Os02g02000.1  
AT2G36840.1 Orysa4|Os09g39740.1

AT2G39570.1  
AT5G56170.1 Orysa4|Os02g48980.1  
AT4G28280.1,AT2G20700.1  
Orysa4|Os09g12620.1  
Orysa4|Os04g42210.1,Orysa4|Os02g33740.1  
Orysa4|Os06g19990.1  
AT1G13980.1 Orysa4|Os03g46330.1  
Orysa4|Os02g22090.1  
AT3G18210.1 Orysa4|Os01g31770.1  
AT1G22950.1  
AT1G48740.1,AT5G43660.1,AT1G48700.1  
AT1G47940.1  
AT3G01850.1,AT1G63290.1 Orysa4|Os09g32810.1  
AT5G61410.1 Orysa4|Os03g07300.1  
AT4G32700.1 Orysa4|Os12g19370.1  
AT4G32695.1  
AT3G61680.1 Orysa4|Os01g43140.1  
AT1G02660.1,AT3G62590.1 Orysa4|Os01g15000.1  
AT5G64460.1 Orysa4|Os04g01230.1  
AT1G09932.1,AT2G17280.1  
AT1G58280.2  
AT1G09935.1  
AT2G30000.1,AT1G07170.1 Orysa4|Os05g30410.1,Orysa4|Os04g56760.1  
Orysa4|Os11g30290.1  
AT1G16240.1,AT1G79590.1 Orysa4|Os08g17600.1,Orysa4|Os02g02720.1  
AT1G16230.1,AT1G16225.1  
AT1G65930.1 Orysa4|Os01g46610.1  
AT5G14590.1 Orysa4|Os04g42920.1  
Orysa4|Os01g14580.1  
AT1G70280.2,AT1G23880.1 Orysa4|Os02g49770.1,Orysa4|Os06g15820.1  
AT1G23890.2 Orysa4|Os08g31970.1  
AT5G14890.1  
AT1G29810.1 Orysa4|Os01g47420.1  
AT5G51110.1 Orysa4|Os03g01030.1  
AT3G07680.1 Orysa4|Os09g32968.1,Orysa4|Os08g42050.1  
AT3G22845.1 Orysa4|Os03g53310.1  
AT5G15860.1,AT3G02410.1,AT1G26120.1 Orysa4|Os06g49440.1  
Orysa4|Os01g45460.1,Orysa4|Os05g50170.1  
AT2G23460.1 Orysa4|Os12g40190.1  
AT1G31930.1 Orysa4|Os06g02130.1,Orysa4|Os11g10050.1  
AT4G34390.1  
Orysa4|Os10g02814.1  
AT5G10150.1 Orysa4|Os03g09200.1  
AT3G46110.1,AT5G59790.1 Orysa4|Os01g62200.1  
AT2G28150.1 Orysa4|Os03g48600.1,Orysa4|Os08g44760.1  
Orysa4|Os01g74370.1  
Orysa4|Os09g39750.1  
AT4G31700.1,AT5G10360.1 Orysa4|Os03g27260.1,Orysa4|Os07g42950.1  
AT4G17490.1,AT5G47230.1  
Orysa4|Os02g43820.1,Orysa4|Os10g41330.1,Orysa4|Os04g46240.1,Orysa4|Os04g46250.1  
AT1G68550.1,AT3G25890.1,AT1G25470.1,AT4G23750.1 Orysa4|Os09g13940.1,Orysa4|Os01g04020.1  
AT5G05410.1,AT3G11020.1 Orysa4|Os01g07120.1  
AT5G18560.1 Orysa4|Os07g47330.1  
AT5G13910.1 Orysa4|Os02g32040.1,Orysa4|Os04g32790.1  
AT1G44830.1,AT1G77640.1,AT1G21910.1 Orysa4|Os06g10780.1  
AT1G15360.1 Orysa4|Os02g10760.1,Orysa4|Os06g40150.1  
AT1G33760.1,AT1G71450.1 Orysa4|Os04g36640.1,Orysa4|Os04g46400.1,Orysa4|Os02g35240.1  
AT5G47220.1,AT4G17500.1 Orysa4|Os04g46220.1,Orysa4|Os02g43790.1  
AT1G22190.1,AT1G78080.1,AT1G36060.1  
Orysa4|Os09g20350.1,Orysa4|Os02g51670.1,Orysa4|Os03g09170.1,Orysa4|Os06g11860.1  
AT1G24590.1,AT1G12980.1 Orysa4|Os02g38090.1  
AT2G31230.1,AT1G06160.1 Orysa4|Os03g64260.1  
AT5G50080.1 Orysa4|Os05g36100.1,Orysa4|Os01g64790.1,Orysa4|Os11g06770.1  
AT1G12630.1,AT5G52020.1 Orysa4|Os02g45420.1  
AT1G74930.1,AT1G19210.1,AT5G21960.1 Orysa4|Os08g35240.1,Orysa4|Os06g11940.1,Orysa4|Os06g09810.1  
AT3G50260.1,AT5G67190.1,AT2G23340.1,AT4G36900.1 Orysa4|Os04g55520.1  
AT1G53170.1,AT3G15210.1 Orysa4|Os01g58420.1,Orysa4|Os05g41780.1  
AT5G11590.1,AT5G25810.1,AT4G32800.1 Orysa4|Os02g13710.1,Orysa4|Os02g43970.1  
AT3G20310.1,AT1G50640.1 Orysa4|Os02g09650.1,Orysa4|Os04g57340.1  
AT1G64380.1 Orysa4|Os05g49700.1  
AT5G25190.1 Orysa4|Os06g08340.1,Orysa4|Os02g55380.1  
AT4G25490.1,AT5G51990.1,AT4G25480.1,AT4G25470.1 Orysa4|Os04g48350.1,Orysa4|Os06g03670.1  
AT4G06746.1 Orysa4|Os06g07030.1  
AT1G28360.1 Orysa4|Os05g41760.1  
AT5G19790.1 Orysa4|Os07g10410.1  
AT2G47520.1 Orysa4|Os01g21120.1  
AT5G07310.1,AT5G13330.1 Orysa4|Os02g32140.1,Orysa4|Os08g42550.1,Orysa4|Os04g32620.1  
AT3G60490.1,AT2G44940.1 Orysa4|Os10g41130.1,Orysa4|Os04g46440.1,Orysa4|Os04g46410.1  
AT1G71520.1,AT1G22810.1 Orysa4|Os01g66270.1,Orysa4|Os05g34730.1  
AT3G14230.1,AT1G53910.1 Orysa4|Os09g26420.1,Orysa4|Os06g09390.1,Orysa4|Os02g54160.1  
AT2G40220.1 Orysa4|Os05g28350.1  
AT5G61600.1,AT5G51190.1

AT1G49120.1  
 AT1G80580.1  
 AT1G28160.1  
 AT1G12890.1  
 AT5G11190.1,AT5G25390.2  
 AT1G01250.1  
 AT5G07580.1,AT5G61590.1  
 AT2G44840.1  
 AT4G39780.1,AT5G65130.1  
 AT4G13620.1  
 AT3G23240.1  
 AT2G33710.1  
 AT1G43160.1  
 AT5G64750.1  
 AT2G36450.1  
 AT5G44210.1  
 AT1G28370.1  
 AT4G16750.1  
 AT1G46768.1  
 AT5G61890.1  
 AT1G77200.1  
 Orysa4|Os01g46870.1,Orysa4|Os01g12440.1,Orysa4|Os06g06540.1  
 Orysa4|Os08g27220.1  
 Orysa4|Os08g45110.1  
 Orysa4|Os05g27930.1  
 Orysa4|Os08g07700.1  
 Orysa4|Os06g23050.1  
 Orysa4|Os01g54890.1  
 Orysa4|Os10g22600.1,Orysa4|Os08g31580.1  
 Orysa4|Os07g22770.1,Orysa4|Os07g22730.1  
 Orysa4|Os05g49010.1  
 Orysa4|Os07g12510.1  
 Orysa4|Os04g34970.1  
 Orysa4|Os10g38000.1  
 Orysa4|Os04g48330.1  
 Orysa4|Os06g09760.1,Orysa4|Os06g09790.1,Orysa4|Os06g09717.1  
 Orysa4|Os06g42990.1  
 Orysa4|Os04g52090.1  
 Orysa4|Os01g10370.1  
 Orysa4|Os06g47590.1,Orysa4|Os02g06330.1  
 Orysa4|Os04g56150.1  
 Orysa4|Os09g35020.1,Orysa4|Os08g43200.1,Orysa4|Os08g43210.1,Orysa4|Os09g35010.1  
 Orysa4|Os01g73770.1  
 Orysa4|Os06g06970.1  
 Orysa4|Os12g39330.1  
 Orysa4|Os03g08500.1,Orysa4|Os03g08470.1,Orysa4|Os10g25170.1,Orysa4|Os07g42510.1,Orysa4|Os03g08490.1  
 Orysa4|Os12g41060.1  
 Orysa4|Os09g11480.1,Orysa4|Os09g11460.1  
 Orysa4|Os03g08460.1  
 Orysa4|Os05g39590.1  
 AT1G66070.1,AT5G37475.1 Orysa4|Os02g02990.1  
 Orysa4|Os05g41630.1  
 AT2G21045.1 Orysa4|Os02g01220.1,Orysa4|Os04g17660.1  
 AT4G35770.1 Orysa4|Os06g50930.1  
 AT2G17850.1,AT5G66170.2  
 AT5G66040.1  
 Orysa4|Os02g06290.1  
 AT4G18100.1,AT5G46430.1  
 Orysa4|Os09g32500.1,Orysa4|Os09g32520.1,Orysa4|Os08g41300.1,Orysa4|Os09g32532.1  
 AT1G76050.2 Orysa4|Os06g50360.1  
 AT5G54770.1 Orysa4|Os07g34570.1  
 AT5G07830.1,AT5G61250.1 Orysa4|Os12g38920.1  
 AT5G34940.2 Orysa4|Os06g08090.1,Orysa4|Os02g55870.1  
 Orysa4|Os03g11320.1  
 Orysa4|Os07g40740.1  
 AT1G27510.1 Orysa4|Os01g01790.1  
 AT4G33630.1 Orysa4|Os10g34400.1  
 AT1G05960.1 Orysa4|Os01g67290.1  
 AT2G41830.1 Orysa4|Os07g10550.1,Orysa4|Os02g53990.1,Orysa4|Os02g05040.1  
 AT5G26850.1 Orysa4|Os03g19520.1  
 AT5G21080.1  
 AT1G33140.1,AT4G10450.1,AT1G33120.1 Orysa4|Os09g31180.1,Orysa4|Os02g01332.1  
 AT2G40540.1 Orysa4|Os07g48130.1,Orysa4|Os03g21890.1  
 AT3G02050.1 Orysa4|Os07g47350.1,Orysa4|Os01g70940.1  
 AT4G13420.1 Orysa4|Os04g32920.1,Orysa4|Os01g70490.1  
 AT5G14880.1,AT1G70300.1 Orysa4|Os06g42030.1,Orysa4|Os02g49760.1  
 AT4G33530.1,AT5G09400.1 Orysa4|Os07g32530.1  
 AT4G23640.1  
 Orysa4|Os06g45940.1  
 Orysa4|Os01g27170.1  
 Orysa4|Os09g27580.1

Orysa4|Os01g70660.1,Orysa4|Os08g39950.1  
Orysa4|Os02g31940.1,Orysa4|Os03g37830.1,Orysa4|Os02g31910.1  
Orysa4|Os03g37840.1,Orysa4|Os03g37930.1,Orysa4|Os07g01214.1  
Orysa4|Os03g55370.1  
Orysa4|Os04g52120.1  
AT5G20290.1 Orysa4|Os02g28810.1,Orysa4|Os04g28180.1  
AT5G59240.1  
AT5G67270.1 Orysa4|Os10g35580.1  
AT5G62500.1,AT3G47690.1 Orysa4|Os04g54940.1  
AT5G08100.1 Orysa4|Os03g40070.1  
AT3G16150.1 Orysa4|Os04g55710.1  
Orysa4|Os03g26100.1,Orysa4|Os03g51120.1,Orysa4|Os02g33160.1,Orysa4|Os04g46150.1,Orysa4|Os01g55620.1,Orysa4|Os04g51420.1  
AT5G11750.1,AT4G11630.1,AT1G24240.1 Orysa4|Os02g11030.1  
AT5G47190.1,AT4G17560.1 Orysa4|Os02g43600.1  
AT3G29970.1 Orysa4|Os07g41350.1,Orysa4|Os07g41340.1  
Orysa4|Os03g40450.1  
AT1G47560.1,AT1G47550.1 Orysa4|Os03g42750.1  
Orysa4|Os11g17600.1  
AT3G05590.1,AT5G27850.1 Orysa4|Os03g22180.1,Orysa4|Os05g06310.1,Orysa4|Os07g47780.1  
AT2G47570.1  
AT1G36240.1,AT1G77940.1,AT3G18740.1 Orysa4|Os01g16890.1,Orysa4|Os01g59730.1,Orysa4|Os05g41110.1  
AT3G10950.1 Orysa4|Os01g48770.1,Orysa4|Os05g48320.1  
AT3G60245.1  
AT3G05170.1 Orysa4|Os05g04960.1  
AT1G08940.1  
Orysa4|Os10g13450.1,Orysa4|Os06g01950.1  
AT3G58610.1 Orysa4|Os01g46380.1,Orysa4|Os05g49800.1  
Orysa4|Os10g30970.1,Orysa4|Os02g05780.1  
AT1G11680.1 Orysa4|Os11g32240.1  
Orysa4|Os05g34380.1  
Orysa4|Os07g28160.1,Orysa4|Os02g21810.1,Orysa4|Os07g28110.1,Orysa4|Os05g12040.1  
Orysa4|Os07g37970.1  
Orysa4|Os07g37980.1  
AT2G28550.1,AT5G60120.1 Orysa4|Os07g13170.1,Orysa4|Os03g60430.1,Orysa4|Os05g03040.1  
AT5G57390.1 Orysa4|Os04g55970.1,Orysa4|Os06g44750.1  
AT1G16060.1,AT1G79700.1 Orysa4|Os09g25600.1,Orysa4|Os08g34360.1  
AT3G54320.1 Orysa4|Os12g03290.1,Orysa4|Os11g03540.1  
AT4G37750.1 Orysa4|Os03g56050.1,Orysa4|Os03g12950.1  
AT3G20840.1,AT1G51190.1  
Orysa4|Os11g19060.1,Orysa4|Os01g67410.1,Orysa4|Os02g40070.1,Orysa4|Os04g42570.1  
AT2G39250.1,AT3G54990.1  
AT5G67180.1,AT4G36920.1  
AT5G10510.1,AT5G65510.1  
AT2G41710.2  
AT1G72570.1  
AT5G17430.1  
Orysa4|Os03g07940.1  
Orysa4|Os08g07440.1  
Orysa4|Os01g59780.1,Orysa4|Os06g05340.1  
Orysa4|Os02g51300.1,Orysa4|Os07g03250.1  
Orysa4|Os07g39110.1  
Orysa4|Os06g44770.1  
AT4G32010.1 Orysa4|Os07g48200.1  
AT2G30470.1  
AT3G49350.1,AT5G24390.1,AT5G53570.1 Orysa4|Os09g35960.1  
AT5G41940.1  
AT1G50840.1,AT3G20540.1 Orysa4|Os04g54500.1,Orysa4|Os08g07840.1  
AT2G13350.1,AT1G04540.1,AT2G33320.1,AT3G04360.1,AT4G01200.1 Orysa4|Os02g57000.1  
Orysa4|Os01g47040.1  
AT1G55255.1 Orysa4|Os10g41590.1  
AT2G44950.1 Orysa4|Os04g46450.1  
AT1G55250.1  
AT3G28770.1,AT1G56660.1,AT5G45520.1 Orysa4|Os07g07040.1,Orysa4|Os02g38470.1  
AT5G60030.1  
Orysa4|Os04g51960.1  
AT1G20970.1 Orysa4|Os08g40250.1  
AT4G27500.1 Orysa4|Os08g30060.1,Orysa4|Os09g17730.1  
AT5G15110.1,AT1G14420.1,AT2G02720.1,AT3G01270.1  
Orysa4|Os06g38510.1,Orysa4|Os06g05209.1,Orysa4|Os02g12300.1,Orysa4|Os06g05260.1  
AT3G53190.1,AT5G04310.1 Orysa4|Os10g31910.1  
AT3G55140.1 Orysa4|Os01g36620.1  
AT4G13710.1,AT1G04680.1 Orysa4|Os04g05050.1  
AT5G09280.1 Orysa4|Os08g18970.1  
AT3G54920.1  
AT3G09540.1  
AT5G55720.1,AT1G67750.1,AT3G07010.1,AT5G48900.1,AT4G24780.1,AT3G27400.1,AT5G63180.1  
AT3G24230.1  
AT1G11920.1,AT4G22090.1,AT1G30350.1,AT4G22080.1  
AT4G13210.1,AT3G24670.1  
Orysa4|Os06g05272.1  
Orysa4|Os01g62000.1

AT2G24420.1,AT4G31340.1 Orysa4|Os09g32250.1,Orysa4|Os08g40790.1  
AT4G30090.1  
AT5G44180.1 Orysa4|Os05g48820.1,Orysa4|Os01g48180.1  
AT1G28420.1  
AT4G12750.1  
Orysa4|Os01g48170.1  
AT5G47840.1 Orysa4|Os08g01770.1  
AT5G35170.1 Orysa4|Os08g19140.1  
AT2G41880.1,AT3G57550.2 Orysa4|Os12g33100.1  
AT3G13070.1,AT1G55930.1 Orysa4|Os03g39640.1  
AT5G40310.1,AT3G27970.1 Orysa4|Os02g47920.1  
AT3G15080.1 Orysa4|Os08g28980.1  
AT2G48100.1  
AT5G67610.2,AT3G49840.1 Orysa4|Os03g31570.1  
AT1G28760.1 Orysa4|Os03g45180.1  
AT5G49430.1 Orysa4|Os03g19340.1  
AT2G47410.1  
AT5G08390.1,AT5G23430.1 Orysa4|Os04g58130.1,Orysa4|Os01g57210.1,Orysa4|Os10g35200.1  
AT1G61210.1  
AT1G11160.1  
AT1G52360.1,AT3G15980.3,AT1G79990.1 Orysa4|Os06g05180.1  
Orysa4|Os02g11830.1,Orysa4|Os02g11840.1  
AT2G17950.1 Orysa4|Os04g56780.1  
AT1G46480.1 Orysa4|Os04g55590.1  
AT5G62200.1,AT2G41440.1,AT2G41470.1 Orysa4|Os05g07890.1,Orysa4|Os01g07780.1  
AT5G07190.1,AT5G62210.1  
AT1G80920.1 Orysa4|Os06g44160.1  
AT1G72070.1  
AT5G67250.1,AT3G50080.1,AT1G47056.1,AT4G07400.1 Orysa4|Os04g42670.1  
Orysa4|Os03g45910.1,Orysa4|Os03g19660.1  
Orysa4|Os03g42740.1  
AT5G22000.1 Orysa4|Os03g57500.1,Orysa4|Os11g36430.1  
AT4G14220.1  
AT5G36880.1 Orysa4|Os02g32490.1,Orysa4|Os04g33190.1  
AT1G65580.1,AT2G31830.1,AT1G05630.1,AT2G43900.1 Orysa4|Os08g41270.1,Orysa4|Os09g32440.1  
Orysa4|Os02g27620.1  
AT5G57740.1 Orysa4|Os02g54860.1  
AT5G07270.1 Orysa4|Os10g37730.1  
Orysa4|Os06g03800.1  
AT5G18630.1,AT5G18640.1 Orysa4|Os01g71010.1,Orysa4|Os05g30900.1  
Orysa4|Os11g43510.1  
Orysa4|Os07g47250.1  
Orysa4|Os03g22670.1  
AT3G58500.1,AT2G42500.1 Orysa4|Os03g59060.1  
AT1G50370.1,AT3G19980.1 Orysa4|Os01g49690.1  
AT1G10430.1,AT1G59830.1,AT1G69960.1 Orysa4|Os06g37660.1,Orysa4|Os02g12580.1  
AT5G63870.1 Orysa4|Os08g40200.1  
AT2G39840.1 Orysa4|Os03g16110.1  
AT3G05580.1,AT5G27840.2 Orysa4|Os01g24750.1  
AT2G42810.2 Orysa4|Os05g11550.1  
AT1G64040.1,AT4G11240.1 Orysa4|Os06g06880.1  
AT5G55260.1,AT4G26720.1 Orysa4|Os09g11230.1  
AT1G48120.1  
AT5G10900.1  
AT5G59160.1,AT3G46820.1  
AT5G43380.1  
AT2G29400.1  
Orysa4|Os10g27050.1,Orysa4|Os03g07150.1  
Orysa4|Os08g35440.1  
Orysa4|Os02g57450.1  
AT1G12320.1,AT1G62840.1,AT2G45360.1,AT3G60780.1 Orysa4|Os02g25780.1  
AT5G62280.1  
Orysa4|Os08g01910.1  
AT5G52040.2,AT4G25500.1 Orysa4|Os02g03040.1  
AT2G46610.1,AT3G61860.1 Orysa4|Os04g02870.1  
AT1G01060.1,AT2G46830.1 Orysa4|Os08g06110.1  
AT5G37260.1,AT5G17300.1 Orysa4|Os06g51260.1  
AT3G10113.1,AT1G18330.1  
AT5G66280.1,AT3G51160.1 Orysa4|Os06g04620.1  
Orysa4|Os04g30550.1  
AT3G08530.1,AT3G11130.1 Orysa4|Os12g01390.1,Orysa4|Os11g01380.1  
AT5G55190.1,AT5G20020.1 Orysa4|Os01g42530.1  
AT5G20010.1  
AT5G55080.1  
AT5G42940.1,AT1G45180.1,AT4G34040.1,AT2G15530.1 Orysa4|Os04g55510.1  
Orysa4|Os04g10680.1  
AT5G02560.1 Orysa4|Os05g38640.1  
AT2G38810.1,AT3G54560.1 Orysa4|Os03g53190.1,Orysa4|Os10g28230.1,Orysa4|Os03g06670.1  
AT3G20670.1,AT1G51060.1,AT5G54640.1,AT4G27230.1 Orysa4|Os07g36140.1,Orysa4|Os08g33100.1  
AT1G08880.1,AT1G54690.1 Orysa4|Os12g34510.1,Orysa4|Os03g51200.1  
AT4G13570.1  
AT1G52740.1



Orysa4|Os08g19240.1,Orysa4|Os03g17100.1,Orysa4|Os01g31800.1,Orysa4|Os05g02300.1  
Orysa4|Os04g13530.1  
Orysa4|Os07g37340.1  
Orysa4|Os12g25120.1,Orysa4|Os07g36130.1  
AT2G47470.1 Orysa4|Os01g23740.1  
AT1G07960.1 Orysa4|Os03g17860.1  
AT1G05690.1 Orysa4|Os01g66890.1  
AT4G37610.1,AT5G67480.2  
AT1G62640.1 Orysa4|Os04g55060.1  
AT5G57500.1 Orysa4|Os09g26330.1,Orysa4|Os02g54370.1  
Orysa4|Os02g54390.1,Orysa4|Os02g54420.1,Orysa4|Os02g54450.1  
Orysa4|Os09g26310.1,Orysa4|Os09g26300.1,Orysa4|Os09g26320.1,Orysa4|Os05g47880.1  
Orysa4|Os06g09270.1  
AT2G42490.1 Orysa4|Os04g40040.1  
Orysa4|Os02g37990.1,Orysa4|Os04g04950.1  
Orysa4|Os02g38010.1  
AT3G07880.1 Orysa4|Os02g48730.1,Orysa4|Os06g21340.1  
AT1G62450.1,AT1G12070.1  
Orysa4|Os01g68540.1  
AT1G56340.1,AT1G09210.1 Orysa4|Os03g61670.1,Orysa4|Os07g14270.1  
AT1G08450.1 Orysa4|Os01g67054.1,Orysa4|Os05g43170.1  
Orysa4|Os08g44670.1  
AT4G05160.1 Orysa4|Os03g05780.1  
AT3G48990.1 Orysa4|Os04g58710.1  
AT5G38120.1,AT1G20480.1,AT1G20510.1 Orysa4|Os03g04000.1  
AT5G63380.1 Orysa4|Os01g67540.1,Orysa4|Os01g67530.1  
AT3G21230.1,AT3G21240.1,AT1G51680.1 Orysa4|Os08g14760.1,Orysa4|Os02g08100.1,Orysa4|Os06g44620.1  
AT1G62940.1 Orysa4|Os04g24530.1  
AT1G65060.1 Orysa4|Os02g46970.1  
AT3G16170.1  
AT1G20500.1,AT1G20490.1  
Orysa4|Os07g44560.1  
Orysa4|Os07g17970.1  
Orysa4|Os08g34790.1  
AT2G01470.1,AT5G50650.1,AT5G50550.1 Orysa4|Os11g39650.1  
AT3G52190.1 Orysa4|Os07g09000.1  
Orysa4|Os03g58570.1  
AT3G27090.1 Orysa4|Os05g41930.1  
AT2G35140.1 Orysa4|Os09g39020.1  
AT5G42050.1 Orysa4|Os01g36950.1  
Orysa4|Os05g51590.1  
AT2G44530.1 Orysa4|Os02g03540.1  
AT1G32380.1,AT2G35390.2  
AT3G53530.2,AT2G37390.1 Orysa4|Os03g60480.1  
AT3G24450.1 Orysa4|Os01g52160.1,Orysa4|Os05g45820.1  
AT5G02600.1  
Orysa4|Os01g41200.1  
AT2G43320.1 Orysa4|Os04g41500.1  
AT4G14000.1 Orysa4|Os09g19570.1  
Orysa4|Os09g33920.1  
AT4G26000.1 Orysa4|Os10g41440.1  
AT3G04610.1 Orysa4|Os12g40560.1,Orysa4|Os03g42900.1  
Orysa4|Os02g03310.1  
Orysa4|Os10g27470.1  
AT3G20230.1 Orysa4|Os02g46440.1  
AT1G08845.1 Orysa4|Os10g41050.1  
AT3G22450.1 Orysa4|Os10g34320.1  
Orysa4|Os06g30870.1  
AT4G13610.1,AT4G08990.1,AT5G49160.1,AT4G14140.1 Orysa4|Os07g08500.1,Orysa4|Os03g58400.1  
AT4G37420.1 Orysa4|Os06g51210.1  
AT5G40720.1,AT3G27330.1 Orysa4|Os08g02850.1  
AT1G27200.1  
Orysa4|Os12g16690.1  
AT5G19690.1 Orysa4|Os05g44360.1  
AT1G34130.1 Orysa4|Os04g57890.1  
AT4G35220.1 Orysa4|Os08g23100.1  
AT4G34180.1  
Orysa4|Os02g09420.1,Orysa4|Os06g43180.1,Orysa4|Os09g02270.1  
AT5G54680.1,AT1G51070.1 Orysa4|Os07g35870.1,Orysa4|Os08g04390.1  
AT4G14410.1,AT3G23210.1  
Orysa4|Os02g02480.1,Orysa4|Os05g38140.1  
AT5G57815.1,AT4G28060.1 Orysa4|Os03g27290.1,Orysa4|Os04g42060.1,Orysa4|Os07g42910.1  
AT1G32710.1  
AT1G22450.1  
AT5G04820.1 Orysa4|Os11g05770.1,Orysa4|Os12g06150.1  
Orysa4|Os05g36990.1,Orysa4|Os01g64410.1,Orysa4|Os04g58820.1,Orysa4|Os04g33870.1,Orysa4|Os08g01190.1  
AT5G16710.1 Orysa4|Os06g12630.1  
AT1G19550.1  
AT5G17640.1 Orysa4|Os08g06640.1  
AT3G13700.1 Orysa4|Os06g05800.1  
AT3G21215.1 Orysa4|Os08g15080.1

Orysa4|Os06g47300.1  
AT3G55730.1,AT3G09230.1,AT2G39880.1 Orysa4|Os01g63160.1  
AT2G47460.1,AT3G62610.1,AT5G49330.1 Orysa4|Os01g19970.1  
AT3G24310.1,AT4G13480.1 Orysa4|Os02g40530.1,Orysa4|Os04g42950.1  
AT5G57620.1 Orysa4|Os08g15020.1  
AT1G26780.1,AT1G69560.1 Orysa4|Os01g16810.1,Orysa4|Os08g33800.1  
AT4G28110.1,AT4G05100.1,AT4G21440.1 Orysa4|Os07g37210.1  
AT5G16600.1,AT1G66230.1 Orysa4|Os08g33150.1,Orysa4|Os09g23620.1,Orysa4|Os06g14670.1  
AT1G68320.1,AT1G25340.1 Orysa4|Os01g03720.1,Orysa4|Os05g04210.1  
AT5G11510.1,AT4G32730.2 Orysa4|Os01g12860.1,Orysa4|Os12g13570.1  
AT1G34670.1 Orysa4|Os08g37970.1,Orysa4|Os06g11780.1  
AT1G09540.1,AT1G57560.1 Orysa4|Os01g18240.1,Orysa4|Os05g04820.1  
AT3G28470.1 Orysa4|Os03g18480.1  
AT3G27810.1,AT5G40350.1 Orysa4|Os05g49310.1  
AT1G16490.1,AT1G79180.1 Orysa4|Os04g50770.1,Orysa4|Os02g46780.1  
AT3G46130.1,AT5G59780.3 Orysa4|Os11g47460.1,Orysa4|Os12g37970.1  
AT5G67300.1,AT3G50060.1,AT4G37260.1,AT2G23290.1 Orysa4|Os02g09480.1,Orysa4|Os09g01960.1  
AT1G08810.1 Orysa4|Os12g03150.1,Orysa4|Os11g03440.1  
AT3G12720.1 Orysa4|Os07g31470.1  
AT3G11440.1,AT5G06100.2 Orysa4|Os01g59660.1  
AT3G09370.1,AT5G02320.1 Orysa4|Os05g38460.1,Orysa4|Os01g62410.1  
AT3G13890.1 Orysa4|Os01g51260.1  
AT1G63910.1 Orysa4|Os08g05520.1  
AT5G56110.1 Orysa4|Os04g39470.1  
AT4G18770.1 Orysa4|Os06g06740.1,Orysa4|Os12g07610.1  
AT5G52260.1,AT4G25560.1 Orysa4|Os02g02370.1,Orysa4|Os02g42850.1,Orysa4|Os04g45020.1  
AT4G22680.1 Orysa4|Os09g36250.1  
AT1G74650.1,AT3G47600.1,AT5G62470.2,AT3G28910.1  
Orysa4|Os07g43580.1,Orysa4|Os08g33940.1,Orysa4|Os09g24800.1  
AT2G37630.1 Orysa4|Os12g38400.1  
AT5G49620.1,AT3G06490.1 Orysa4|Os01g19330.1,Orysa4|Os03g20090.1  
AT1G14350.1,AT2G02820.2 Orysa4|Os07g43420.1  
AT3G13540.1 Orysa4|Os01g50110.1  
AT3G01140.1,AT5G15310.1 Orysa4|Os08g33660.1  
AT4G38620.1,AT4G34990.1 Orysa4|Os09g36730.1,Orysa4|Os08g43550.1  
AT5G65790.1,AT3G49690.1 Orysa4|Os03g56090.1,Orysa4|Os02g54520.1  
AT3G08500.1 Orysa4|Os12g33070.1  
AT3G30210.1  
AT3G29020.1  
AT5G39700.1  
AT5G17800.1  
AT5G54230.1  
AT5G14340.1  
AT3G01530.1  
AT4G00540.1  
AT5G65230.1,AT3G02940.1,AT5G10280.1  
AT5G16770.1  
AT5G26660.1  
AT4G01680.2  
AT1G18960.1  
AT1G56160.1,AT3G12820.1  
AT3G53200.1  
AT2G26960.1,AT2G26950.1  
AT3G60460.1  
AT2G32460.1  
AT5G55020.1  
AT4G26930.1  
AT3G27785.1,AT5G40360.1  
AT5G11050.1,AT5G58850.1  
AT5G40430.1,AT2G25230.1  
AT3G48920.1  
AT5G62320.1  
AT1G48000.1  
AT2G47190.1  
AT5G60890.1  
AT1G18710.1  
AT3G27920.1,AT2G16720.1  
AT5G23000.1,AT2G36890.1  
AT4G37780.1  
AT5G12870.1  
Orysa4|Os06g04960.1  
Orysa4|Os03g13310.1  
Orysa4|Os03g29614.1  
Orysa4|Os03g04900.1  
Orysa4|Os10g35660.1,Orysa4|Os05g48010.1,Orysa4|Os01g49160.1  
Orysa4|Os09g26170.1  
Orysa4|Os01g07430.1  
Orysa4|Os02g49986.1  
Orysa4|Os02g17190.1  
Orysa4|Os01g07450.1,Orysa4|Os07g44090.1  
Orysa4|Os03g25550.1  
Orysa4|Os01g45090.1

Orysa4|Os01g74410.1  
Orysa4|Os01g74590.1,Orysa4|Os05g28320.1  
Orysa4|Os02g49250.1,Orysa4|Os07g25370.1,Orysa4|Os06g43090.1  
Orysa4|Os06g40330.1  
Orysa4|Os05g41166.1  
Orysa4|Os07g12130.1  
Orysa4|Os07g25150.1,Orysa4|Os07g30130.1  
Orysa4|Os03g26130.1  
Orysa4|Os11g45740.1,Orysa4|Os12g37690.1  
Orysa4|Os02g36890.1  
Orysa4|Os01g65370.1  
AT3G45070.1,AT2G03750.1,AT5G07000.1,AT3G45080.1,AT5G43690.1,AT2G03760.1,AT2G03770.1,AT1G74100.1,AT2G14920.1,AT1G28170.1,AT5G07010.1,AT1G13420.1,AT4G26280.1  
Orysa4|Os01g20950.1,Orysa4|Os04g44460.1,Orysa4|Os04g29000.1,Orysa4|Os12g04320.1,Orysa4|Os02g45890.1,Orysa4|Os06g42120.1,Orysa4|Os08g40380.1,Orysa4|Os07g41460.1,Orysa4|Os11g26390.1,Orysa4|Os11g30810.1,Orysa4|Os11g30910.1,Orysa4|Os09g38239.1  
AT1G18590.1,AT1G74090.1  
AT1G13430.1,AT2G27570.1  
AT3G51210.1  
Orysa4|Os08g40390.1,Orysa4|Os08g40330.1,Orysa4|Os10g11270.1,Orysa4|Os12g17160.1  
Orysa4|Os08g14190.1,Orysa4|Os08g17510.1,Orysa4|Os07g05460.1,Orysa4|Os08g20130.1,Orysa4|Os08g14180.1  
Orysa4|Os11g30890.1  
Orysa4|Os12g04340.1,Orysa4|Os11g04550.1,Orysa4|Os12g04350.1,Orysa4|Os11g04540.1  
Orysa4|Os07g05450.1  
Orysa4|Os11g30830.1  
Orysa4|Os06g14220.1,Orysa4|Os08g17520.1  
Orysa4|Os07g41560.1  
Orysa4|Os07g41540.1  
AT3G19770.1,AT5G09320.1 Orysa4|Os03g15650.1  
Orysa4|Os04g39970.1  
Orysa4|Os03g62580.1  
Orysa4|Os01g19510.1  
AT3G24170.1 Orysa4|Os02g56850.1  
AT3G54660.1 Orysa4|Os03g06740.1  
AT2G16040.1,AT1G35150.1,AT2G06500.1  
Orysa4|Os09g12410.1,Orysa4|Os11g41110.1,Orysa4|Os10g28180.1,Orysa4|Os06g40680.1  
AT4G10200.1 Orysa4|Os12g37830.1,Orysa4|Os02g14150.1  
AT2G19960.1  
AT5G35475.1  
AT3G29638.1  
Orysa4|Os05g46070.1  
Orysa4|Os01g34950.1  
AT1G30450.1 Orysa4|Os08g23440.1  
Orysa4|Os01g19850.1  
Orysa4|Os01g19860.1  
AT3G06210.1,AT4G14280.1,AT5G18980.1 Orysa4|Os03g24820.1,Orysa4|Os03g24730.1  
Orysa4|Os12g32930.1,Orysa4|Os12g34360.1  
Orysa4|Os07g45370.1  
Orysa4|Os01g34010.1,Orysa4|Os01g33869.1,Orysa4|Os01g33930.1  
Orysa4|Os01g34000.1  
AT4G10360.1 Orysa4|Os05g40700.1,Orysa4|Os01g60120.1  
AT3G59920.1,AT2G44100.1 Orysa4|Os05g23860.1,Orysa4|Os05g34540.1  
Orysa4|Os07g16970.1  
AT3G22830.1 Orysa4|Os10g28340.1,Orysa4|Os07g08140.1,Orysa4|Os03g58160.1,Orysa4|Os03g06630.1  
AT5G03720.1 Orysa4|Os02g32590.1  
AT4G11660.1 Orysa4|Os09g35790.1,Orysa4|Os08g43334.1  
AT3G24520.1 Orysa4|Os06g35960.1,Orysa4|Os01g43590.1,Orysa4|Os02g13800.1  
AT4G13980.1 Orysa4|Os02g29340.1  
AT1G32330.1 Orysa4|Os03g63750.1  
AT4G18880.1,AT5G45710.1 Orysa4|Os01g54550.1,Orysa4|Os05g45410.1  
AT1G46264.1 Orysa4|Os03g25120.1,Orysa4|Os07g44690.1  
AT5G54070.1,AT2G26150.1  
AT5G43840.1  
AT3G63350.1,AT3G51910.1  
AT4G36990.1  
AT5G62020.1  
AT4G18870.1,AT4G17750.1  
AT1G77570.1  
AT3G02990.1,AT5G16820.1  
AT1G67970.1  
AT4G19630.1  
Orysa4|Os04g48030.1  
Orysa4|Os11g08970.1  
Orysa4|Os01g53220.1  
Orysa4|Os03g12370.1  
Orysa4|Os06g22610.1  
Orysa4|Os08g36700.1,Orysa4|Os09g28200.1  
AT5G23900.1,AT3G49010.1 Orysa4|Os03g37970.1,Orysa4|Os06g02510.1  
AT3G48960.1  
AT1G69410.1,AT1G13950.1 Orysa4|Os07g02210.1,Orysa4|Os07g40580.1,Orysa4|Os12g32240.1  
AT1G26630.1

Orysa4|Os07g13230.1  
AT4G18380.1,AT5G46170.1,AT1G30200.1 Orysa4|Os01g56390.1,Orysa4|Os05g43490.1  
Orysa4|Os03g20500.1,Orysa4|Os01g59690.1  
AT1G10760.1 Orysa4|Os06g30310.1  
AT4G24450.1  
AT1G72370.1 Orysa4|Os03g08440.1,Orysa4|Os07g42450.1  
AT3G04770.1  
AT5G50950.1,AT2G47510.1 Orysa4|Os03g21950.1  
AT1G09690.1,AT1G09590.1,AT1G57860.1,AT1G57660.1 Orysa4|Os10g32820.1,Orysa4|Os03g04750.1  
AT3G48530.1 Orysa4|Os04g31340.1  
AT1G69800.1 Orysa4|Os01g40420.1  
Orysa4|Os12g16300.1  
Orysa4|Os01g69240.1  
Orysa4|Os01g44250.1  
AT5G06060.1 Orysa4|Os03g16220.1,Orysa4|Os03g16210.1,Orysa4|Os03g16230.1  
AT2G29320.1,AT2G29300.1,AT2G30670.1,AT1G07450.1,AT2G29290.1,AT2G29360.1,AT2G29350.1,AT2G29340.1,AT2G29330.1,AT1G07440.1,AT2G29310.1,AT2G29150.1,AT2G29370.1  
AT2G29170.1,AT2G29260.1  
Orysa4|Os11g25230.1,Orysa4|Os11g25170.1,Orysa4|Os11g25700.1  
Orysa4|Os04g22730.1  
Orysa4|Os11g25100.1  
Orysa4|Os11g25220.1,Orysa4|Os11g43200.1  
AT5G55390.1 Orysa4|Os08g24880.1,Orysa4|Os08g24946.1  
Orysa4|Os12g12300.1  
Orysa4|Os03g15990.1  
Orysa4|Os01g32720.1  
Orysa4|Os01g32710.1  
AT4G02680.1 Orysa4|Os11g37520.1,Orysa4|Os07g08120.1  
AT5G58550.1,AT3G51770.2  
AT5G17920.1,AT3G03780.1 Orysa4|Os12g42884.1  
AT5G20980.1  
AT3G49500.1 Orysa4|Os01g34350.1  
AT4G11130.1 Orysa4|Os04g39160.1  
AT1G14790.1 Orysa4|Os02g50330.1  
AT2G05370.1  
AT5G51820.1 Orysa4|Os10g11140.1  
AT5G11480.1 Orysa4|Os01g53150.1  
AT2G22870.1 Orysa4|Os03g13000.1  
AT4G15410.1,AT4G22150.1,AT4G04210.1 Orysa4|Os04g39040.1  
AT3G21660.1  
Orysa4|Os06g42810.1  
AT4G33720.1,AT2G14610.1,AT2G14580.1  
Orysa4|Os10g11500.1,Orysa4|Os01g28500.1,Orysa4|Os07g03730.1,Orysa4|Os07g03288.1,Orysa4|Os01g28450.1,Orysa4|Os07g03590.1,Orysa4|Os07g03690.1,Orysa4|Os07g03279.1,Orysa4|Os07g03710.1  
AT5G57625.1,AT4G30320.1 Orysa4|Os02g54540.1  
AT5G02730.1,AT3G09590.1  
AT2G19980.1,AT2G19990.1,AT2G19970.1  
AT4G33710.1,AT5G26130.1  
AT5G66590.1  
AT3G19690.1  
AT1G50060.1,AT1G50050.1  
AT4G07820.1  
AT4G33730.1  
AT4G31470.1,AT4G25790.1  
Orysa4|Os07g14030.1,Orysa4|Os07g03610.1,Orysa4|Os07g03620.1,Orysa4|Os06g24290.1  
Orysa4|Os07g14070.1  
Orysa4|Os07g03377.1,Orysa4|Os07g03467.1  
Orysa4|Os05g51680.1  
Orysa4|Os02g54530.1  
AT2G26800.2 Orysa4|Os01g16350.1  
Orysa4|Os12g04020.1,Orysa4|Os11g04210.1  
AT1G17530.1,AT1G72750.1 Orysa4|Os10g37530.1,Orysa4|Os03g02390.1  
AT3G04800.1  
Orysa4|Os04g47900.1  
AT4G31010.1 Orysa4|Os08g07790.1  
AT2G20020.1 Orysa4|Os01g31110.1  
AT1G23400.1 Orysa4|Os01g21990.1  
AT5G54890.1  
AT2G25870.1 Orysa4|Os01g53720.1  
Orysa4|Os09g22000.1  
Orysa4|Os02g13360.1  
AT4G24972.1,AT1G32583.1 Orysa4|Os12g28750.1  
Orysa4|Os10g14020.1  
AT4G33380.1 Orysa4|Os02g52410.1,Orysa4|Os06g11070.1  
Orysa4|Os02g57170.1  
AT3G57680.1 Orysa4|Os06g21380.1  
AT4G17740.1 Orysa4|Os02g57060.1  
AT5G22470.1 Orysa4|Os02g32860.1  
AT2G31320.1 Orysa4|Os07g23110.1  
AT4G26500.1 Orysa4|Os09g09790.1  
Orysa4|Os03g11990.1  
Orysa4|Os02g42400.1

AT3G59310.2,AT3G59340.1,AT3G59320.1 Orysa4|Os05g23440.1,Orysa4|Os08g42720.1  
AT3G59330.1  
Orysa4|Os05g23460.1  
Orysa4|Os05g37200.1  
Orysa4|Os09g33830.1  
Orysa4|Os05g37210.1  
AT5G32621.1,AT3G15310.1  
Orysa4|Os02g54430.1,Orysa4|Os03g27540.1,Orysa4|Os04g47760.1,Orysa4|Os12g36410.1,Orysa4|Os02  
g33480.1,Orysa4|Os11g31520.1,Orysa4|Os01g60580.1,Orysa4|Os10g31130.1,Orysa4|Os06g50290.1,Orysa4|Os07g  
38770.1,Orysa4|Os05g43630.1,Orysa4|Os11g14150.1,Orysa4|Os06g36859.1,Orysa4|Os06g21507.1,Orysa4|Os06g3  
4370.1,Orysa4|Os04g21870.1,Orysa4|Os01g34400.1,Orysa4|Os08g15520.1,Orysa4|Os09g18430.1,Orysa4|Os06g21  
498.1,Orysa4|Os01g65240.1,Orysa4|Os10g41350.1  
AT2G13770.1,AT1G24370.1  
Orysa4|Os07g10750.1,Orysa4|Os02g26750.1,Orysa4|Os12g07170.1,Orysa4|Os02g45400.1,Orysa4|Os09  
g18240.1,Orysa4|Os04g34810.1,Orysa4|Os12g35900.1,Orysa4|Os04g47500.1,Orysa4|Os06g02720.1,Orysa4|Os01g  
08500.1,Orysa4|Os08g40480.1,Orysa4|Os01g36710.1,Orysa4|Os09g08510.1,Orysa4|Os05g32740.1,Orysa4|Os08g2  
2230.1  
AT5G34838.1  
AT2G07520.1  
AT2G10980.1  
AT1G43590.1  
AT3G30190.1  
Orysa4|Os09g25670.1,Orysa4|Os11g28290.1  
Orysa4|Os02g23950.1,Orysa4|Os02g28420.1,Orysa4|Os07g31620.1,Orysa4|Os07g36850.1,Orysa4|Os07  
g27660.1,Orysa4|Os06g44990.1  
Orysa4|Os01g11320.1,Orysa4|Os11g24470.1,Orysa4|Os07g12880.1  
Orysa4|Os01g74560.1,Orysa4|Os01g27580.1,Orysa4|Os07g36260.1,Orysa4|Os08g37850.1  
Orysa4|Os02g20770.1,Orysa4|Os05g23330.1  
Orysa4|Os01g15700.1  
Orysa4|Os03g37350.1  
Orysa4|Os06g20280.1  
Orysa4|Os06g42870.1  
Orysa4|Os09g14650.1  
AT4G14930.1 Orysa4|Os07g10460.1  
AT1G72880.1 Orysa4|Os01g51280.1  
AT5G54810.1,AT4G27070.1 Orysa4|Os08g04180.1  
AT5G28237.1  
AT2G42320.1,AT3G57780.1 Orysa4|Os08g39490.1,Orysa4|Os09g31230.1  
AT3G01810.1 Orysa4|Os12g13340.1  
AT5G06930.1  
AT5G43230.1  
AT5G43220.1  
AT5G64550.1,AT5G09670.1 Orysa4|Os02g36590.1,Orysa4|Os04g38520.1,Orysa4|Os04g54830.1  
AT1G64140.1 Orysa4|Os01g43370.1  
Orysa4|Os06g27830.1  
Orysa4|Os06g33180.1,Orysa4|Os02g15880.1  
AT2G47400.1,AT3G62410.1 Orysa4|Os01g19740.1,Orysa4|Os03g19380.1  
AT1G76560.1 Orysa4|Os08g40240.1  
AT2G26975.1,AT5G59040.1,AT3G46900.1,AT5G59030.1  
Orysa4|Os01g56420.1,Orysa4|Os01g56430.1,Orysa4|Os05g35050.1  
AT2G37925.1  
Orysa4|Os04g33900.1,Orysa4|Os03g25470.1  
AT5G57450.1 Orysa4|Os02g35450.1  
AT5G20850.1 Orysa4|Os12g31370.1,Orysa4|Os11g40150.1  
AT3G22880.1 Orysa4|Os12g04980.1  
Orysa4|Os12g07900.1  
AT1G76490.1 Orysa4|Os09g31970.1,Orysa4|Os08g40180.1  
AT2G17370.1  
Orysa4|Os02g48330.1  
AT2G05220.1,AT3G10610.1,AT2G04390.1,AT5G04800.1 Orysa4|Os03g01900.1,Orysa4|Os10g27190.1  
AT4G28640.1,AT2G33310.2,AT1G04550.2 Orysa4|Os02g57250.1  
AT4G29080.1 Orysa4|Os05g14180.1,Orysa4|Os01g13030.1,Orysa4|Os06g22870.1  
AT4G14550.1,AT3G23050.1,AT3G04730.1 Orysa4|Os12g40890.1,Orysa4|Os03g43400.1  
AT3G17600.1 Orysa4|Os02g49160.1,Orysa4|Os01g18360.1  
AT1G15050.1,AT2G01200.2  
AT1G04100.1  
AT2G22670.1  
AT3G23030.1  
AT3G15540.1,AT1G52830.1  
AT1G15580.1  
AT4G32280.1  
AT5G65670.1  
AT4G14560.1,AT1G04250.1  
AT2G46990.1,AT3G62100.1  
Orysa4|Os03g53150.1  
Orysa4|Os06g07040.1  
AT5G67510.1,AT3G49910.1 Orysa4|Os12g05430.1,Orysa4|Os01g04730.1  
AT2G30530.1 Orysa4|Os05g25070.1  
AT4G02800.1 Orysa4|Os04g15800.1  
AT1G30050.1,AT5G01970.1  
Orysa4|Os11g02640.1,Orysa4|Os12g02570.1  
AT3G55280.1,AT2G39460.1 Orysa4|Os01g24690.1,Orysa4|Os04g42270.1

AT3G12180.1 Orysa4|Os12g32180.1  
AT1G62880.1,AT4G12090.1,AT1G12340.1,AT1G12390.1  
AT5G13210.1,AT3G24780.1,AT5G43390.1,AT5G43400.1  
Orysa4|Os02g08330.1,Orysa4|Os09g32370.1,Orysa4|Os06g44240.1  
Orysa4|Os12g04770.1  
Orysa4|Os09g32360.1  
AT3G04920.1,AT5G28060.1 Orysa4|Os01g52490.1,Orysa4|Os02g13530.1,Orysa4|Os06g36160.1  
AT5G01450.1,AT2G38185.4 Orysa4|Os05g44550.1  
Orysa4|Os06g14200.1  
AT1G65920.1 Orysa4|Os02g45980.1,Orysa4|Os04g49430.1  
AT3G02300.1 Orysa4|Os03g40260.1  
AT5G63860.1 Orysa4|Os04g35570.1  
AT1G27060.1 Orysa4|Os01g56990.1  
AT3G15430.1 Orysa4|Os07g27490.1  
AT5G16040.1,AT3G02510.1 Orysa4|Os08g33390.1  
AT5G48330.1 Orysa4|Os02g10380.1  
AT5G08710.1 Orysa4|Os11g34320.1  
AT5G19420.1,AT5G12350.1 Orysa4|Os01g72320.1,Orysa4|Os05g31920.1  
AT5G42140.1,AT1G76950.1 Orysa4|Os04g58960.1  
AT3G26100.2 Orysa4|Os12g18650.1  
AT4G14370.1,AT3G23270.1 Orysa4|Os05g46740.1,Orysa4|Os01g50470.1  
AT5G60870.1  
AT3G47660.1  
AT1G69710.1  
Orysa4|Os02g34860.1  
Orysa4|Os05g01610.1,Orysa4|Os01g73410.1  
Orysa4|Os02g38350.1  
AT1G07350.1,AT4G35785.2  
Orysa4|Os03g15890.1,Orysa4|Os01g26840.1,Orysa4|Os06g50890.1,Orysa4|Os08g29650.1  
AT1G16610.1 Orysa4|Os05g01540.1,Orysa4|Os01g72890.1  
AT1G79100.1  
AT2G20050.1 Orysa4|Os02g17970.1  
AT3G06270.1  
AT1G25440.1,AT1G68520.1 Orysa4|Os06g15330.1  
AT1G07050.1,AT1G73870.1  
AT2G37410.1 Orysa4|Os07g41330.1  
AT1G20350.1  
AT5G11690.1  
Orysa4|Os05g07250.1  
AT5G26570.1 Orysa4|Os12g20150.1  
AT3G47460.1,AT5G62410.1 Orysa4|Os01g67740.1  
AT2G39270.1 Orysa4|Os03g03820.1,Orysa4|Os04g57540.1  
AT3G01820.1 Orysa4|Os08g02540.1  
AT2G37250.1  
AT1G07660.1 Orysa4|Os09g26340.1  
AT1G07820.1  
AT3G46320.1  
AT3G53730.1  
AT2G28740.1  
AT5G59970.1  
AT3G45930.1  
AT5G59690.1  
Orysa4|Os02g45940.1  
Orysa4|Os10g39410.1  
Orysa4|Os05g38740.1  
Orysa4|Os09g38020.1  
Orysa4|Os05g39050.1  
Orysa4|Os04g49420.1  
Orysa4|Os07g36500.1  
Orysa4|Os05g38760.1  
Orysa4|Os01g61920.1  
Orysa4|Os03g02780.1  
AT1G26110.1 Orysa4|Os06g30060.1,Orysa4|Os01g02090.1  
AT5G45330.1  
AT4G19360.1  
AT2G27100.1 Orysa4|Os06g48530.1,Orysa4|Os08g40560.1  
AT5G51980.2,AT4G25440.1 Orysa4|Os02g45480.1  
AT5G40880.1,AT5G49200.1  
Orysa4|Os03g05210.1  
Orysa4|Os03g05250.1  
Orysa4|Os01g09252.1  
AT1G79460.1  
Orysa4|Os04g52210.1,Orysa4|Os04g52240.1,Orysa4|Os12g30824.1,Orysa4|Os11g28530.1,Orysa4|Os02  
g36140.1,Orysa4|Os02g36264.1,Orysa4|Os04g10060.1,Orysa4|Os04g52230.1,Orysa4|Os02g36220.1  
Orysa4|Os12g30800.1  
Orysa4|Os11g28490.1  
Orysa4|Os11g28500.1  
AT2G04750.1,AT5G35700.1 Orysa4|Os02g48740.1  
AT5G55400.1,AT4G26700.1  
AT5G48460.1  
Orysa4|Os02g37580.1  
AT1G12060.1 Orysa4|Os02g48780.1

AT2G46240.1 Orysa4|Os02g15930.1  
Orysa4|Os11g31060.1  
AT4G09040.1 Orysa4|Os08g37700.1  
AT3G52380.1 Orysa4|Os07g06450.1  
AT2G35410.1 Orysa4|Os04g50110.1  
AT2G18510.1 Orysa4|Os10g31900.1  
AT1G01080.2 Orysa4|Os08g02390.1  
AT1G49760.1 Orysa4|Os09g02700.1,Orysa4|Os04g42600.1,Orysa4|Os08g22354.1  
AT3G53460.1,AT2G37220.1 Orysa4|Os07g43810.1,Orysa4|Os03g25960.1  
AT1G60000.1 Orysa4|Os02g57010.1  
AT2G36660.1 Orysa4|Os03g17030.1  
AT5G50250.1,AT4G24770.1 Orysa4|Os08g44290.1,Orysa4|Os09g39180.1  
AT4G34110.1,AT3G16380.1,AT2G15500.1,AT3G19350.1,AT1G71770.1,AT2G23350.1,AT1G34140.1  
AT1G22760.1  
AT5G03580.1  
Orysa4|Os04g58590.1  
AT1G24610.1 Orysa4|Os02g50100.1  
AT2G22400.1,AT4G40000.1 Orysa4|Os08g37780.1,Orysa4|Os09g29630.1  
AT3G10980.1,AT5G05350.1 Orysa4|Os05g39730.1  
Orysa4|Os11g01842.1,Orysa4|Os12g01890.1,Orysa4|Os01g61060.1,Orysa4|Os11g01850.1  
Orysa4|Os05g27570.1  
Orysa4|Os02g47460.1  
AT5G65990.1,AT4G38250.1,AT2G42005.1 Orysa4|Os04g47780.1,Orysa4|Os02g44980.1  
AT3G11900.1 Orysa4|Os07g12770.1  
AT5G63190.1 Orysa4|Os08g02690.1  
AT3G48390.1,AT1G22730.1,AT4G24800.1 Orysa4|Os03g12180.1  
AT1G63010.1,AT4G22990.1,AT4G11810.1 Orysa4|Os06g03860.1,Orysa4|Os04g48390.1  
Orysa4|Os02g45520.1  
Orysa4|Os09g34990.1  
AT2G32700.1 Orysa4|Os02g56880.1  
AT4G14750.1 Orysa4|Os03g06570.1,Orysa4|Os03g43580.1,Orysa4|Os12g41160.1,Orysa4|Os10g28420.1  
AT3G52290.1 Orysa4|Os01g61720.1,Orysa4|Os05g03190.1  
AT3G22190.1 Orysa4|Os03g57330.1  
AT3G59690.1 Orysa4|Os01g67090.1  
AT3G49260.1 Orysa4|Os02g19640.1  
AT2G26180.1 Orysa4|Os01g09790.1  
AT2G33990.1 Orysa4|Os06g06160.1  
AT3G51380.1 Orysa4|Os03g04210.1  
AT3G09710.1,AT5G03040.1  
AT2G26410.1  
AT1G17480.1,AT1G72670.1  
AT3G15050.1  
Orysa4|Os05g44630.1  
Orysa4|Os03g23960.1  
Orysa4|Os12g42430.1,Orysa4|Os03g44610.1  
Orysa4|Os06g23390.1  
Orysa4|Os06g23380.1  
Orysa4|Os05g46350.1,Orysa4|Os01g51230.1  
AT5G43560.1,AT1G04300.1 Orysa4|Os12g40520.1  
AT5G52330.1  
Orysa4|Os01g56800.1,Orysa4|Os05g43280.1  
AT5G20350.1 Orysa4|Os02g09130.1,Orysa4|Os06g43680.1  
Orysa4|Os11g34860.1  
AT5G53470.1,AT4G27780.1 Orysa4|Os04g58550.1  
Orysa4|Os04g58490.1  
AT5G06580.1 Orysa4|Os07g06890.1  
AT2G02120.1,AT2G02100.1,AT2G02130.1,AT1G61070.1 Orysa4|Os03g03810.1  
AT5G63660.1  
AT2G02140.1  
Orysa4|Os02g07600.1,Orysa4|Os04g11130.1  
AT1G18420.1,AT3G18440.1,AT1G25480.1,AT1G68600.1,AT2G17470.1 Orysa4|Os02g49790.1  
Orysa4|Os01g12210.1  
Orysa4|Os06g15779.1  
AT2G17410.1 Orysa4|Os02g48370.1,Orysa4|Os06g41730.1  
AT1G20910.1,AT1G76510.1  
AT1G11390.1,AT1G61640.1 Orysa4|Os04g56510.1  
Orysa4|Os07g37180.1  
AT1G77630.1,AT1G21880.2 Orysa4|Os02g53000.1,Orysa4|Os06g10660.1  
AT2G17120.1 Orysa4|Os09g37600.1,Orysa4|Os03g04110.1  
Orysa4|Os09g27890.1  
Orysa4|Os11g34570.1  
AT5G19850.1 Orysa4|Os07g38830.1  
AT4G36530.2 Orysa4|Os02g47620.1  
AT2G30050.1,AT3G01340.1 Orysa4|Os02g04320.1  
Orysa4|Os03g61630.1,Orysa4|Os07g14280.1  
AT5G51230.1 Orysa4|Os04g08034.1,Orysa4|Os09g13630.1  
AT4G16845.1,AT4G16810.1,AT2G35670.1  
AT1G19180.1,AT1G74950.1 Orysa4|Os09g26780.1,Orysa4|Os07g42370.1  
AT1G72450.1,AT1G17380.1  
Orysa4|Os10g25230.1,Orysa4|Os03g08320.1,Orysa4|Os03g08330.1,Orysa4|Os10g25290.1  
Orysa4|Os03g27900.1  
AT1G03060.1,AT4G02660.1 Orysa4|Os03g53280.1

AT1G14320.1,AT1G26910.1,AT1G66580.1 Orysa4|Os11g11390.1  
Orysa4|Os03g21470.1  
AT1G49010.1 Orysa4|Os04g58020.1,Orysa4|Os01g34060.1  
AT5G58900.1,AT2G38090.1 Orysa4|Os05g37730.1,Orysa4|Os01g63460.1,Orysa4|Os01g04930.1  
AT4G39250.1,AT2G21650.1,AT1G19510.1,AT1G75250.1 Orysa4|Os01g44390.1  
AT3G10585.1,AT5G23650.1,AT5G08520.1,AT5G04760.1  
AT5G47290.1  
AT3G11280.1,AT5G05790.1  
AT5G01200.1  
AT3G10590.1  
AT4G36570.1  
Orysa4|Os03g62100.1  
Orysa4|Os06g07640.1  
Orysa4|Os01g64360.1  
Orysa4|Os01g44370.1,Orysa4|Os05g50350.1  
Orysa4|Os05g49240.1,Orysa4|Os01g47370.1  
Orysa4|Os02g47744.1,Orysa4|Os12g33950.1  
Orysa4|Os05g37040.1  
Orysa4|Os03g63890.1  
AT5G02270.1 Orysa4|Os03g20170.1  
AT5G44110.1,AT1G03905.1 Orysa4|Os02g56550.1  
ATCG00190.1 Orysa4|Os04g16820.1,Orysa4|Os10g21220.1  
Orysa4|Os05g22830.1  
Orysa4|Os05g22860.1,Orysa4|Os02g24620.1  
AT4G30780.1,AT2G24100.1 Orysa4|Os02g55070.1,Orysa4|Os06g08740.1,Orysa4|Os09g04160.1  
AT3G05770.1,AT1G54300.1  
AT3G60770.1,AT4G00100.1 Orysa4|Os08g02400.1,Orysa4|Os08g02410.1  
Orysa4|Os07g38540.1  
AT1G28350.1,AT2G33840.1 Orysa4|Os08g23110.1,Orysa4|Os08g05490.1  
Orysa4|Os08g09260.1  
Orysa4|Os07g47860.1  
Orysa4|Os04g58400.1,Orysa4|Os02g49030.1  
AT4G38890.1 Orysa4|Os04g02730.1  
AT1G55340.1,AT3G03880.1 Orysa4|Os03g59250.1  
AT4G27585.1,AT5G54100.1 Orysa4|Os08g06200.1  
Orysa4|Os08g15600.1  
AT5G08110.1 Orysa4|Os02g02150.1,Orysa4|Os07g41570.1  
AT2G32040.1 Orysa4|Os03g58080.1,Orysa4|Os07g07654.1  
AT2G26770.1 Orysa4|Os01g59130.1  
AT2G40820.1,AT3G56480.1  
Orysa4|Os03g24940.1,Orysa4|Os07g44830.1  
AT3G06790.1 Orysa4|Os03g38490.1  
AT2G33430.1 Orysa4|Os06g02600.1,Orysa4|Os04g51280.1  
AT1G11430.1 Orysa4|Os08g04450.1  
AT1G32580.1,AT2G35240.1  
AT5G11710.1 Orysa4|Os01g53670.1,Orysa4|Os04g51120.1  
AT2G43160.1,AT3G59290.1 Orysa4|Os02g56270.1  
AT3G48430.1 Orysa4|Os12g18150.1  
Orysa4|Os03g05480.1  
Orysa4|Os12g07200.1  
AT5G28690.1,AT3G04700.1,AT1G08790.1 Orysa4|Os04g21340.1  
AT2G15610.1,AT4G33985.1,AT2G15590.2 Orysa4|Os02g52770.1  
AT3G50350.1  
Orysa4|Os02g26170.1  
AT2G18400.1 Orysa4|Os03g51510.1  
AT1G63830.1 Orysa4|Os03g03180.1  
AT5G41390.1  
AT4G23470.1  
Orysa4|Os10g39100.1  
AT5G09810.1 Orysa4|Os11g06390.1  
AT1G18450.1 Orysa4|Os08g04280.1  
AT3G33520.1 Orysa4|Os01g16414.1  
AT3G27000.1 Orysa4|Os08g28190.1  
AT1G13180.1 Orysa4|Os02g38340.1  
AT3G60830.1 Orysa4|Os03g56970.1  
AT3G12110.1 Orysa4|Os03g50890.1  
AT1G73910.1  
AT3G18780.2,AT1G49240.1  
AT5G59370.1,AT3G46520.1  
AT2G42100.1  
Orysa4|Os10g36650.1  
Orysa4|Os01g73310.1,Orysa4|Os05g01600.1  
Orysa4|Os05g36290.1,Orysa4|Os01g64630.1,Orysa4|Os03g61970.1  
Orysa4|Os12g06660.1  
Orysa4|Os12g44350.1  
AT3G20810.2 Orysa4|Os09g31380.1  
AT1G03350.1 Orysa4|Os07g45310.1,Orysa4|Os01g16670.1  
AT4G13110.1  
AT5G24240.1,AT2G46500.1 Orysa4|Os05g51230.1  
AT1G64460.1  
AT1G64470.1  
Orysa4|Os06g23290.1,Orysa4|Os02g18840.1



Orysa4|Os01g13360.1  
AT2G38010.2 Orysa4|Os01g43520.1  
AT5G58980.1,AT1G07380.1  
AT1G08360.1,AT2G27530.1,AT5G22440.1 Orysa4|Os01g64090.1,Orysa4|Os08g44450.1,Orysa4|Os02g21660.1  
AT5G55000.2 Orysa4|Os10g30190.1,Orysa4|Os03g06160.1  
AT1G67430.1,AT1G27400.1 Orysa4|Os09g08430.1,Orysa4|Os08g41810.1  
AT5G53350.1 Orysa4|Os02g19150.1  
AT1G33360.1 Orysa4|Os02g35630.1  
AT5G49840.1  
Orysa4|Os05g45750.1  
Orysa4|Os01g66330.1  
AT3G66658.2 Orysa4|Os07g48920.1  
AT3G24503.1 Orysa4|Os01g40870.1,Orysa4|Os01g40860.1  
AT1G74920.1,AT3G48170.1 Orysa4|Os08g32870.1  
AT1G79440.1 Orysa4|Os02g07760.1  
AT2G14170.1 Orysa4|Os07g09060.1  
AT1G54100.1 Orysa4|Os09g26880.1  
Orysa4|Os07g48950.1  
Orysa4|Os06g39230.1  
Orysa4|Os04g39020.1  
AT2G36000.1 Orysa4|Os03g24590.1  
AT2G34620.1,AT3G18870.1  
AT1G61260.1,AT1G11230.1,AT1G11210.1,AT1G11220.1 Orysa4|Os07g37620.1  
AT4G04990.1  
AT5G54300.1  
AT1G58250.1 Orysa4|Os03g47760.1  
AT5G49670.1  
Orysa4|Os03g23030.1  
AT3G60250.1,AT2G44680.1 Orysa4|Os07g31280.1,Orysa4|Os10g41520.1  
AT4G17640.1,AT5G47080.1  
AT1G78560.1 Orysa4|Os04g31210.1  
AT4G15880.1,AT3G06910.1 Orysa4|Os03g22400.1,Orysa4|Os01g25370.1  
AT4G00690.1  
Orysa4|Os03g29630.1  
AT4G30920.1,AT2G24200.1,AT4G30910.1 Orysa4|Os02g55140.1  
Orysa4|Os12g24650.1  
AT4G39540.1,AT2G21940.2 Orysa4|Os04g54800.1,Orysa4|Os06g12150.1  
AT3G11760.1 Orysa4|Os03g44670.1,Orysa4|Os12g42570.1  
AT5G04860.1  
AT2G10560.1  
Orysa4|Os01g09770.1  
AT1G62180.1,AT4G04610.1,AT4G21990.1 Orysa4|Os07g32570.1  
AT2G36310.1 Orysa4|Os08g44370.1,Orysa4|Os09g39440.1  
AT1G05620.1 Orysa4|Os03g31170.1  
AT5G52420.1,AT5G23920.1 Orysa4|Os10g40040.1  
AT1G27990.1 Orysa4|Os04g31710.1  
AT4G18465.1 Orysa4|Os01g11370.1  
AT1G26370.1 Orysa4|Os06g09280.1  
AT2G47680.1 Orysa4|Os01g15300.1  
AT2G35340.1,AT1G32490.1 Orysa4|Os08g24760.1  
AT4G01020.1,AT5G10370.1 Orysa4|Os07g42900.1  
AT3G26560.1 Orysa4|Os02g19860.1  
AT1G27900.1 Orysa4|Os11g20554.1  
AT1G33390.1 Orysa4|Os02g50370.1  
AT5G13010.1 Orysa4|Os07g32430.1  
AT4G16680.1  
Orysa4|Os05g32370.1  
Orysa4|Os01g21280.1  
Orysa4|Os03g17432.1  
Orysa4|Os06g23530.1  
Orysa4|Os11g09060.1  
AT5G53045.1 Orysa4|Os02g20330.1,Orysa4|Os02g20280.1,Orysa4|Os08g42210.1  
AT1G54110.1,AT3G55600.1 Orysa4|Os08g42110.1,Orysa4|Os09g10000.1  
AT3G19420.1 Orysa4|Os12g21890.1  
AT5G39400.1  
AT3G50110.1  
AT1G78880.1,AT1G16860.1 Orysa4|Os08g13350.1  
AT4G11150.1,AT1G64200.1 Orysa4|Os01g46980.1  
Orysa4|Os01g12260.1  
AT1G47980.1 Orysa4|Os04g33150.1  
AT3G62730.1 Orysa4|Os03g22470.1  
Orysa4|Os05g05920.1  
AT3G60910.1 Orysa4|Os07g46340.1  
AT3G17365.1 Orysa4|Os08g40580.1  
Orysa4|Os05g32590.1  
AT5G06150.1,AT3G11520.1,AT4G37490.1,AT1G34460.1 Orysa4|Os01g59120.1,Orysa4|Os05g41390.1  
AT1G14750.1 Orysa4|Os03g12414.1  
AT1G20610.1,AT1G76310.1 Orysa4|Os06g51110.1,Orysa4|Os04g47580.1  
AT1G44110.1 Orysa4|Os01g13229.1,Orysa4|Os05g14730.1,Orysa4|Os01g13260.1,Orysa4|Os12g20324.1  
AT1G15570.1,AT1G80370.1 Orysa4|Os12g31810.1  
AT1G16330.1  
AT2G26760.1

AT1G20590.1  
AT2G17620.1,AT4G35620.1  
AT1G77390.1  
AT5G11300.1,AT5G25380.1  
Orysa4|Os05g42200.1  
Orysa4|Os01g17402.1  
AT1G19360.1,AT1G75120.1,AT1G75110.1 Orysa4|Os07g39840.1  
AT5G09995.2,AT1G08530.1 Orysa4|Os12g24240.1  
AT4G15530.1 Orysa4|Os03g31750.1,Orysa4|Os05g33570.1  
Orysa4|Os03g31780.1  
AT3G03773.1 Orysa4|Os03g45270.1  
AT4G02450.1 Orysa4|Os08g27070.1  
Orysa4|Os03g26460.1  
AT4G22380.1,AT4G12600.1,AT5G20160.2 Orysa4|Os03g13800.1  
Orysa4|Os10g03540.1  
AT5G65910.1,AT3G49800.1 Orysa4|Os05g43520.1,Orysa4|Os01g56100.1  
AT2G10950.1  
Orysa4|Os03g52000.1  
Orysa4|Os11g35320.1  
Orysa4|Os06g07820.1  
AT1G04960.1 Orysa4|Os09g30478.1  
AT2G30060.1,AT5G58590.1,AT1G07140.1 Orysa4|Os03g18180.1,Orysa4|Os05g28290.1  
AT5G57140.1 Orysa4|Os06g48570.1  
AT5G63140.1 Orysa4|Os09g36290.1  
AT2G46880.1  
AT5G52920.1 Orysa4|Os01g47080.1  
AT1G50020.1 Orysa4|Os11g34870.1  
AT5G63680.1,AT5G08570.1 Orysa4|Os04g58110.1  
AT5G56350.1,AT4G26390.1 Orysa4|Os01g16960.1  
AT1G32440.1 Orysa4|Os10g42100.1  
AT2G36580.1,AT3G52990.1 Orysa4|Os11g05110.1,Orysa4|Os12g05110.1  
AT3G04050.1,AT3G25960.1,AT3G55650.1,AT3G55810.1  
Orysa4|Os03g20880.1  
Orysa4|Os11g10980.1  
Orysa4|Os09g22410.1  
AT1G54710.1 Orysa4|Os05g33610.1  
AT5G54730.1 Orysa4|Os01g57720.1  
AT1G03380.1  
AT4G32870.1 Orysa4|Os01g52570.1  
AT2G25770.1  
Orysa4|Os05g11250.1,Orysa4|Os01g10210.1  
AT3G60540.1,AT2G45070.1 Orysa4|Os12g07490.1,Orysa4|Os01g38510.1  
AT5G60460.1 Orysa4|Os11g01300.1,Orysa4|Os12g01260.1  
AT5G10870.1 Orysa4|Os08g34290.1,Orysa4|Os02g08410.1  
AT1G69370.1 Orysa4|Os01g55870.1  
AT3G29200.1  
AT5G64300.1 Orysa4|Os02g36340.1  
AT5G59750.1 Orysa4|Os05g38570.1  
AT2G22450.1  
AT1G05510.1,AT2G31985.1 Orysa4|Os05g49440.1  
AT4G18920.1,AT5G45690.1 Orysa4|Os01g54520.1,Orysa4|Os01g52830.1  
AT1G29680.1  
AT3G04230.1,AT5G18380.1,AT2G09990.1 Orysa4|Os12g03090.1,Orysa4|Os11g03400.1  
AT5G52540.1,AT5G24000.1 Orysa4|Os06g01790.1  
AT4G29000.1,AT2G20110.2 Orysa4|Os01g55580.1  
AT5G25790.1  
Orysa4|Os06g22670.1,Orysa4|Os02g17460.1  
Orysa4|Os08g28214.1  
AT2G17870.1,AT4G36020.1  
Orysa4|Os02g02870.1,Orysa4|Os01g36570.1,Orysa4|Os06g03590.1,Orysa4|Os02g43640.1,Orysa4|Os02g43540.1,Orysa4|Os12g13890.1  
AT1G75550.1 Orysa4|Os06g22050.1  
AT5G58470.1 Orysa4|Os01g07070.1  
AT4G01985.1 Orysa4|Os03g19600.1  
AT2G05510.1,AT2G05440.2 Orysa4|Os06g21140.1,Orysa4|Os06g21270.1,Orysa4|Os06g21210.1  
AT2G21660.1,AT4G39260.1 Orysa4|Os03g46770.1,Orysa4|Os12g43600.1  
AT3G15400.1  
AT3G24250.1,AT1G11850.2,AT4G29030.1,AT1G04660.1  
AT1G15830.1  
AT4G16240.1  
AT1G04800.1,AT5G07530.1  
AT3G42130.1  
AT2G14160.1  
Orysa4|Os04g55980.1,Orysa4|Os09g38870.1,Orysa4|Os04g56000.1  
Orysa4|Os11g40520.1  
Orysa4|Os06g35570.1  
Orysa4|Os07g37380.1,Orysa4|Os05g09060.1,Orysa4|Os01g69020.1,Orysa4|Os02g20040.1,Orysa4|Os07g32710.1,Orysa4|Os12g29160.1,Orysa4|Os11g43630.1,Orysa4|Os03g14620.1,Orysa4|Os07g48910.1,Orysa4|Os03g07270.1,Orysa4|Os04g19960.1,Orysa4|Os07g32700.1,Orysa4|Os02g58180.1,Orysa4|Os07g32680.1,Orysa4|Os01g08530.1,Orysa4|Os02g17860.1,Orysa4|Os07g04940.1,Orysa4|Os06g41740.1,Orysa4|Os01g54714.1  
Orysa4|Os04g44120.1  
Orysa4|Os10g04870.1,Orysa4|Os07g25810.1

Orysa4|Os03g58850.1  
Orysa4|Os08g05070.1,Orysa4|Os11g47494.1  
Orysa4|Os06g42070.1  
Orysa4|Os08g37630.1  
Orysa4|Os04g08570.1  
Orysa4|Os10g28960.1  
Orysa4|Os05g12690.1  
Orysa4|Os07g20160.1  
Orysa4|Os05g41820.1  
Orysa4|Os01g32540.1,Orysa4|Os02g55160.1  
Orysa4|Os01g18780.1  
Orysa4|Os07g04380.1  
Orysa4|Os08g24800.1  
Orysa4|Os05g41870.1  
Orysa4|Os06g21220.1,Orysa4|Os06g21230.1,Orysa4|Os06g21240.1  
Orysa4|Os09g11880.1  
Orysa4|Os06g21310.1  
Orysa4|Os04g56040.1  
Orysa4|Os02g36749.1  
Orysa4|Os08g31360.1  
AT3G51120.1 Orysa4|Os10g36810.1,Orysa4|Os09g36090.1  
AT5G63700.1 Orysa4|Os05g34780.1,Orysa4|Os01g66140.1  
AT2G16470.1  
AT2G18090.1,AT2G16480.1  
AT2G16485.1  
AT5G08430.1  
AT3G06350.1 Orysa4|Os01g27750.1  
Orysa4|Os01g27770.1  
Orysa4|Os01g27760.1  
AT1G74040.1,AT1G18500.1 Orysa4|Os12g04440.1,Orysa4|Os11g04670.1  
AT5G23020.1,AT5G23010.1  
AT1G73390.1,AT1G17940.1 Orysa4|Os02g58160.1  
AT5G14020.1 Orysa4|Os11g31570.1  
Orysa4|Os04g44530.1  
AT4G29420.1 Orysa4|Os01g09740.1  
AT3G06810.1 Orysa4|Os07g47820.1  
AT4G33010.1,AT2G26080.1 Orysa4|Os06g40940.1,Orysa4|Os01g51410.1  
AT3G11710.1 Orysa4|Os03g38980.1  
AT3G13490.1 Orysa4|Os02g41470.1  
AT3G17440.1,AT1G48240.1 Orysa4|Os03g25390.1  
AT2G35190.1 Orysa4|Os06g50120.1  
AT1G78140.1 Orysa4|Os08g31750.1  
AT2G41040.1 Orysa4|Os06g43800.1  
AT5G17190.1,AT3G03160.1 Orysa4|Os02g50210.1  
AT1G48440.1,AT3G17780.1 Orysa4|Os03g13750.1  
AT3G01630.1,AT1G31470.1,AT4G19450.1,AT5G45275.1 Orysa4|Os11g01590.1,Orysa4|Os12g01570.1  
AT1G80530.1 Orysa4|Os06g08110.1,Orysa4|Os04g42420.1  
AT2G39210.1,AT2G28120.1  
Orysa4|Os12g29950.1,Orysa4|Os03g58580.1,Orysa4|Os10g08850.1,Orysa4|Os07g09010.1,Orysa4|Os03g47810.1  
AT5G14120.1,AT3G01930.2 Orysa4|Os08g42010.1  
AT4G34950.1,AT2G16660.1 Orysa4|Os09g36600.1  
AT2G30300.1 Orysa4|Os05g39800.1,Orysa4|Os01g61010.1  
AT5G50520.1,AT5G50630.1  
Orysa4|Os08g15450.1  
Orysa4|Os12g44060.1,Orysa4|Os12g44070.1  
Orysa4|Os08g20190.1  
Orysa4|Os04g31924.1  
AT1G10600.1 Orysa4|Os01g47262.1  
AT1G48790.1 Orysa4|Os01g23640.1,Orysa4|Os01g31470.1  
AT4G16144.1  
Orysa4|Os09g21100.1  
AT1G35780.1,AT1G78150.1,AT4G39860.1 Orysa4|Os07g43070.1,Orysa4|Os03g27010.1  
Orysa4|Os04g38310.1,Orysa4|Os02g36500.1  
AT5G60160.1 Orysa4|Os12g13390.1  
AT5G04710.1 Orysa4|Os01g73680.1  
AT3G48770.1 Orysa4|Os11g31480.1,Orysa4|Os11g31500.1  
AT3G28020.1  
Orysa4|Os12g29350.1  
AT5G42570.1 Orysa4|Os02g21650.1,Orysa4|Os05g19040.1  
AT5G48660.1,AT3G07190.1 Orysa4|Os03g63110.1  
AT1G11905.1  
AT3G20450.1  
Orysa4|Os06g26270.1  
Orysa4|Os07g19070.1  
AT1G72260.1,AT2G15010.1,AT1G66100.1,AT5G36910.1  
Orysa4|Os06g32600.1,Orysa4|Os06g32200.1,Orysa4|Os06g31890.1,Orysa4|Os06g32370.1,Orysa4|Os06g31930.1,Orysa4|Os06g32160.1,Orysa4|Os06g32350.1,Orysa4|Os06g32240.1,Orysa4|Os06g31280.1,Orysa4|Os06g31800.1  
AT1G25083.1,AT1G24807.1,AT5G57890.1,AT1G24909.1,AT1G25155.1,AT1G25220.1 Orysa4|Os03g50880.1  
Orysa4|Os04g38950.1  
AT3G07510.1 Orysa4|Os10g09930.1

AT5G05950.1 Orysa4|Os07g13600.1  
AT2G01580.1  
AT3G46890.1  
AT3G46940.1 Orysa4|Os03g46640.1  
AT5G20920.1 Orysa4|Os07g48300.1,Orysa4|Os03g21550.1  
AT3G07920.1  
AT5G01940.1  
AT1G11940.1,AT1G62305.1 Orysa4|Os01g50040.1  
AT5G25970.1,AT5G11730.1 Orysa4|Os03g52120.1  
AT4G25870.1,AT2G19160.1,AT5G57270.1,AT4G30060.1  
Orysa4|Os08g12890.1,Orysa4|Os06g45110.1,Orysa4|Os02g07880.1,Orysa4|Os06g48700.1  
AT1G10280.1 Orysa4|Os08g01890.1  
AT3G52060.1,AT5G22070.1 Orysa4|Os03g44580.1,Orysa4|Os12g42420.1  
AT1G68390.1,AT1G68380.1  
AT3G21310.1,AT1G51770.1  
AT5G25990.1  
AT1G10880.1,AT5G16170.1  
AT4G31350.1  
AT4G32290.1,AT5G25330.1  
Orysa4|Os01g65490.1  
Orysa4|Os07g06490.1  
AT1G67280.1 Orysa4|Os05g14194.1  
AT1G11840.1  
Orysa4|Os02g17920.1  
ATCG00490.1 Orysa4|Os10g21280.1  
ATMG00280.1  
Orysa4|Os05g35330.1,Orysa4|Os01g58020.1,Orysa4|Os12g10580.1  
Orysa4|Os11g32770.1  
Orysa4|Os06g39730.1  
AT3G60750.1,AT2G45290.1 Orysa4|Os06g04270.1  
Orysa4|Os04g19740.1  
AT3G52580.1,AT3G11510.1,AT2G36160.1 Orysa4|Os02g33140.1,Orysa4|Os04g33750.1,Orysa4|Os02g06700.1  
Orysa4|Os02g01540.1  
AT2G11810.1,AT5G20410.1 Orysa4|Os08g20420.1  
AT4G31780.2 Orysa4|Os09g25580.1  
Orysa4|Os02g55910.1  
AT4G19880.2,AT5G45020.1 Orysa4|Os02g21460.1  
AT5G44000.1 Orysa4|Os02g56970.1  
AT5G44990.1  
AT5G62900.1,AT1G10530.1,AT1G60010.1,AT5G50090.1  
Orysa4|Os09g21380.1,Orysa4|Os06g12960.1,Orysa4|Os02g50810.1  
AT5G67620.1 Orysa4|Os10g21130.1,Orysa4|Os03g10320.1  
AT3G61110.1,AT5G47930.1,AT2G45710.1 Orysa4|Os04g27860.1  
AT4G22920.1,AT4G11910.1 Orysa4|Os09g36200.1  
AT1G44000.1  
AT4G34570.1,AT2G16370.1 Orysa4|Os12g26060.1,Orysa4|Os11g29390.1  
AT2G21550.1  
AT1G15710.1,AT5G34930.1 Orysa4|Os06g49520.1  
Orysa4|Os06g35050.1  
AT4G34260.1 Orysa4|Os10g19334.1,Orysa4|Os10g19880.1  
AT3G24430.1 Orysa4|Os01g52170.1  
AT4G19540.1 Orysa4|Os03g42880.1  
AT2G26590.1 Orysa4|Os05g51640.1  
AT5G27490.1,AT3G05280.1 Orysa4|Os01g42480.1  
AT2G39805.1 Orysa4|Os05g38180.1  
Orysa4|Os05g38200.1  
AT4G24340.1,AT4G24350.1 Orysa4|Os06g02210.1  
Orysa4|Os05g13970.1,Orysa4|Os01g12940.1  
AT1G02050.1,AT4G00040.1,AT4G34850.1 Orysa4|Os10g34360.1  
AT5G13930.1 Orysa4|Os11g32650.1  
Orysa4|Os07g22850.1  
Orysa4|Os10g07040.1,Orysa4|Os05g12240.1,Orysa4|Os07g17010.1,Orysa4|Os11g32620.1,Orysa4|Os11g32610.1,Orysa4|Os11g32580.1,Orysa4|Os07g31770.1,Orysa4|Os07g34140.1,Orysa4|Os07g34260.1,Orysa4|Os10g09860.1,Orysa4|Os05g12180.1,Orysa4|Os10g08620.1,Orysa4|Os05g12190.1,Orysa4|Os07g31750.1,Orysa4|Os10g08710.1,Orysa4|Os05g12210.1  
Orysa4|Os11g35930.1,Orysa4|Os07g11440.1,Orysa4|Os04g23940.1,Orysa4|Os01g41834.1  
Orysa4|Os10g08680.1  
Orysa4|Os12g07690.1  
Orysa4|Os10g36972.1,Orysa4|Os11g32540.1  
Orysa4|Os11g32550.1  
AT1G09780.1,AT3G08590.1 Orysa4|Os05g40420.1,Orysa4|Os01g60190.1  
AT5G05480.1 Orysa4|Os05g32820.1  
AT3G14920.1  
Orysa4|Os01g10960.1,Orysa4|Os01g10920.1,Orysa4|Os01g11010.1,Orysa4|Os01g10930.1,Orysa4|Os01g10950.1  
AT1G17030.1 Orysa4|Os05g19030.1,Orysa4|Os05g19000.1  
AT2G47010.1  
AT4G09965.1  
AT3G21070.1 Orysa4|Os05g32210.1,Orysa4|Os01g72690.1  
AT1G54520.1 Orysa4|Os03g48920.1  
Orysa4|Os08g02560.1,Orysa4|Os08g02570.1,Orysa4|Os08g02580.1  
ATCG00680.1

Orysa4|Os08g15260.1,Orysa4|Os06g39710.1,Orysa4|Os10g21310.1,Orysa4|Os12g10600.1,Orysa4|Os08g17980.1,Orysa4|Os09g04680.1  
AT2G21950.1,AT4G11750.1,AT4G39590.1,AT4G39600.1,AT4G23580.1,AT4G39580.1,AT4G39550.1,AT4G11770.1,AT4G39240.1 Orysa4|Os07g47650.1  
AT5G03020.1,AT1G60570.1,AT2G29810.1,AT4G39760.1,AT5G48990.1,AT5G02990.1,AT4G29370.1,AT4G14905.1,AT4G19870.1,AT2G29600.1,AT4G39560.1,AT5G39560.1,AT1G19930.1,AT2G29780.1,AT2G29770.1,AT3G06570.1,AT2G44630.1,AT2G29830.1,AT1G19470.1,AT5G03000.1,AT2G21680.1,AT4G19865.1,AT4G34170.1,AT4G35120.1,AT4G38940.1,AT5G38680.1  
AT2G29820.1  
AT2G34490.1,AT2G34500.1,AT2G28850.1,AT2G28860.1  
Orysa4|Os01g11300.1,Orysa4|Os01g11280.1,Orysa4|Os01g11340.1,Orysa4|Os01g11270.1  
AT5G17210.1 Orysa4|Os06g02440.1  
Orysa4|Os05g35930.1,Orysa4|Os05g35820.1,Orysa4|Os05g35810.1,Orysa4|Os05g35910.1,Orysa4|Os05g35800.1,Orysa4|Os05g35960.1,Orysa4|Os05g35830.1  
AT5G43900.1,AT1G04160.1,AT2G20290.1 Orysa4|Os02g34080.1  
AT4G33200.1 Orysa4|Os02g53740.1  
AT1G08730.1,AT1G54560.1 Orysa4|Os06g29350.1  
AT1G50360.1,AT3G19960.1 Orysa4|Os10g34710.1  
AT2G31900.1 Orysa4|Os03g53660.1  
AT4G28710.1  
AT2G33240.1,AT1G04600.1  
AT5G20450.1,AT1G17580.1,AT5G20490.1  
AT3G58160.1  
AT1G42680.1  
Orysa4|Os02g57190.1  
Orysa4|Os10g19342.1,Orysa4|Os10g19860.1  
Orysa4|Os10g25560.1  
Orysa4|Os05g46030.1  
Orysa4|Os11g23220.1  
Orysa4|Os07g37560.1  
AT3G07120.1 Orysa4|Os01g68900.1  
AT1G62370.1,AT3G25030.1,AT4G22250.1,AT4G13100.1  
AT5G46980.1,AT5G46950.1,AT5G46970.1,AT5G46960.1,AT5G38610.1,AT5G46940.1,AT1G54620.1,AT5G46990.1,AT5G46930.1 Orysa4|Os02g01310.1  
Orysa4|Os02g01300.1  
Orysa4|Os02g46290.1  
AT3G52180.1 Orysa4|Os03g01750.1  
AT3G10940.1 Orysa4|Os11g02180.1,Orysa4|Os12g02120.1  
AT1G09020.1 Orysa4|Os03g63940.1  
Orysa4|Os04g32880.1  
AT2G39970.1 Orysa4|Os03g15860.1  
Orysa4|Os02g13170.1,Orysa4|Os09g33470.1  
AT1G67230.1,AT1G68790.1 Orysa4|Os02g48010.1  
AT5G65770.1 Orysa4|Os01g56140.1  
AT1G13220.2  
AT5G63550.1,AT3G48710.1 Orysa4|Os01g70020.1  
AT4G26630.1,AT5G55660.1 Orysa4|Os03g40010.1  
Orysa4|Os03g29960.1  
AT1G78230.1 Orysa4|Os10g22980.1,Orysa4|Os03g09070.1  
AT4G03260.1 Orysa4|Os07g01550.1,Orysa4|Os05g42220.1  
AT3G02650.1 Orysa4|Os03g39520.1,Orysa4|Os06g08120.1  
Orysa4|Os08g07050.1  
Orysa4|Os08g07040.1  
AT5G50370.1,AT5G63400.1 Orysa4|Os11g20790.1,Orysa4|Os12g13380.1  
AT4G13250.1 Orysa4|Os01g12710.1  
AT5G04900.1 Orysa4|Os03g45194.1  
AT3G50690.1 Orysa4|Os07g41694.1  
Orysa4|Os03g46600.1  
AT1G64660.1 Orysa4|Os10g37340.1  
AT5G10060.1,AT5G65180.1 Orysa4|Os04g54420.1  
Orysa4|Os12g03340.1,Orysa4|Os11g03570.1  
AT3G19860.2 Orysa4|Os02g23823.1  
AT4G36060.1  
AT3G13300.1,AT3G13290.1 Orysa4|Os02g49090.1,Orysa4|Os06g19660.1  
AT2G29580.1,AT1G07360.1 Orysa4|Os06g07350.1,Orysa4|Os07g18050.1  
AT5G04210.1  
AT5G07060.1  
AT3G25860.1 Orysa4|Os09g24320.1,Orysa4|Os08g33440.1  
AT1G34430.1 Orysa4|Os12g08170.1  
AT4G33680.1 Orysa4|Os03g18810.1  
AT2G13810.1  
Orysa4|Os03g09910.1  
AT1G73480.1,AT1G18360.1 Orysa4|Os03g51010.1  
AT5G11650.1 Orysa4|Os01g10250.1  
Orysa4|Os09g23150.1  
AT1G48900.1 Orysa4|Os01g56600.1  
AT1G15310.1  
AT5G66970.1  
AT5G49500.1  
Orysa4|Os05g43390.1  
AT3G09925.1 Orysa4|Os10g39890.1  
AT5G05500.1

Orysa4|Os01g06990.1,Orysa4|Os01g06940.1,Orysa4|Os01g07030.1,Orysa4|Os01g07010.1,Orysa4|Os01g06960.1,Orysa4|Os01g07040.1,Orysa4|Os01g07060.1,Orysa4|Os01g07020.1,Orysa4|Os01g07000.1  
AT3G10050.1 Orysa4|Os03g50510.1  
AT3G22740.1,AT3G63250.1 Orysa4|Os10g28630.1  
AT3G25900.1 Orysa4|Os03g12110.1  
Orysa4|Os01g56610.1  
AT5G35980.1 Orysa4|Os02g47410.1,Orysa4|Os04g51370.1  
AT1G61215.1 Orysa4|Os07g37800.1  
AT3G60110.1,AT2G44430.1 Orysa4|Os08g39980.1,Orysa4|Os09g31454.1  
AT3G57980.1,AT2G42150.1  
AT5G48160.1,AT3G07780.1 Orysa4|Os12g32980.1  
AT3G63500.2,AT1G14740.1 Orysa4|Os03g13590.1,Orysa4|Os03g11890.1  
AT3G17630.1 Orysa4|Os12g42200.1,Orysa4|Os05g19500.1  
AT2G13620.1 Orysa4|Os05g40650.1,Orysa4|Os01g60140.1  
AT3G52080.1 Orysa4|Os12g44300.1  
AT3G53720.1 Orysa4|Os05g02240.1  
AT5G41610.1,AT4G23700.1  
AT1G64170.1  
AT3G44920.1,AT2G28170.1,AT1G08140.1,AT3G44910.1,AT1G08150.1,AT2G30240.1,AT1G06970.1,AT1G08135.1  
AT2G31910.1,AT1G05580.1  
AT5G58460.1,AT5G37060.1  
Orysa4|Os01g73810.1  
Orysa4|Os12g02840.1,Orysa4|Os11g03070.1  
Orysa4|Os08g02450.1,Orysa4|Os12g01820.1,Orysa4|Os11g01820.1  
Orysa4|Os08g43690.1,Orysa4|Os02g58660.1  
Orysa4|Os10g05450.1  
Orysa4|Os05g39600.1  
Orysa4|Os05g31730.1  
AT1G80130.1,AT5G20190.1 Orysa4|Os04g41930.1,Orysa4|Os06g40440.1  
AT4G32340.1  
AT4G17940.1  
Orysa4|Os03g04710.1  
AT3G47080.1,AT1G07280.1,AT2G29670.1 Orysa4|Os01g63620.1,Orysa4|Os05g37520.1  
Orysa4|Os08g29390.1  
Orysa4|Os10g35800.1  
AT3G02690.1 Orysa4|Os10g35140.1  
AT2G21270.1,AT4G38930.2 Orysa4|Os02g08480.1  
AT2G29070.2  
Orysa4|Os04g48770.1,Orysa4|Os09g32020.1  
Orysa4|Os01g05120.1  
AT5G14170.1,AT3G01890.1 Orysa4|Os04g31320.1  
AT4G34100.1 Orysa4|Os06g43210.1  
Orysa4|Os08g01040.1  
Orysa4|Os06g43200.1  
AT5G12430.1,AT2G41520.1 Orysa4|Os05g31062.1,Orysa4|Os01g16680.1  
Orysa4|Os05g31056.1  
AT5G16930.1,AT3G03060.1 Orysa4|Os02g46990.1  
AT4G36580.1,AT2G18330.1 Orysa4|Os02g47760.1  
AT5G66020.1,AT3G51460.1 Orysa4|Os02g34884.1,Orysa4|Os11g20384.1  
AT3G51830.1 Orysa4|Os03g18080.1  
AT5G45550.1 Orysa4|Os03g38020.1  
AT4G19050.1  
AT5G20440.1  
AT5G20430.1  
Orysa4|Os03g29570.1,Orysa4|Os10g25674.1  
Orysa4|Os08g06610.1  
AT1G34420.1 Orysa4|Os12g08180.1  
AT5G21090.1,AT3G43740.2 Orysa4|Os01g59440.1,Orysa4|Os01g17250.1  
AT1G60800.1 Orysa4|Os01g07630.1  
AT1G35710.1 Orysa4|Os10g02970.1  
AT1G73080.1,AT1G17750.1 Orysa4|Os08g34640.1  
AT5G06870.1,AT5G06860.1 Orysa4|Os05g01370.1,Orysa4|Os05g01380.1  
AT5G61480.1 Orysa4|Os08g05290.1  
AT1G06840.1 Orysa4|Os01g72990.1  
AT4G39400.1 Orysa4|Os01g52050.1  
AT4G31250.1,AT1G50610.1,AT5G35390.1,AT2G07040.1,AT3G20190.1  
Orysa4|Os02g07810.1,Orysa4|Os06g45240.1,Orysa4|Os08g40990.1  
AT5G06940.1 Orysa4|Os04g39650.1  
AT2G24130.1 Orysa4|Os06g08710.1,Orysa4|Os06g08690.1  
AT4G20940.1,AT3G28040.1,AT3G49670.1,AT3G47110.1,AT1G17230.1,AT5G53890.1,AT5G25930.1,AT2G27060.1,AT4G08850.1,AT1G72180.1,AT4G20270.1,AT4G28650.1,AT1G75640.1,AT5G01890.1,AT4G36180.1,AT3G47580.1,AT3G56370.1  
Orysa4|Os07g05190.1,Orysa4|Os01g72700.1,Orysa4|Os06g47700.1,Orysa4|Os07g04190.1,Orysa4|Os09g30190.1,Orysa4|Os06g47720.1,Orysa4|Os02g05950.1,Orysa4|Os07g41140.1,Orysa4|Os08g38560.1,Orysa4|Os03g20450.1,Orysa4|Os06g47740.1,Orysa4|Os06g47650.1,Orysa4|Os09g25540.1,Orysa4|Os12g43640.1,Orysa4|Os07g05740.1,Orysa4|Os07g43350.1,Orysa4|Os02g02140.1,Orysa4|Os04g48760.1,Orysa4|Os06g47750.1,Orysa4|Os02g02490.1  
AT1G74190.1,AT1G74180.1,AT5G49290.1,AT2G25470.1,AT1G74170.1,AT3G53240.1 Orysa4|Os04g55420.1  
AT1G56130.1,AT1G56145.1,AT1G56140.1,AT1G56120.1  
Orysa4|Os05g16824.1,Orysa4|Os08g10330.1,Orysa4|Os08g10310.1,Orysa4|Os05g17604.1,Orysa4|Os08g10300.1,Orysa4|Os08g10320.1,Orysa4|Os08g10290.1,Orysa4|Os05g16740.1  
AT1G79620.1 Orysa4|Os03g21230.1

AT1G68400.1 Orysa4|Os01g04230.1  
AT2G42800.1 Orysa4|Os01g52880.1,Orysa4|Os05g45430.1  
AT2G26730.1 Orysa4|Os05g51070.1,Orysa4|Os01g42294.1  
AT3G24660.1 Orysa4|Os08g45060.1  
AT1G74360.1 Orysa4|Os07g40630.1  
AT5G63930.1,AT2G33170.1 Orysa4|Os04g42700.1  
AT3G51740.1 Orysa4|Os03g18630.1  
AT5G45800.1 Orysa4|Os06g35200.1,Orysa4|Os02g14480.1  
AT1G28440.1 Orysa4|Os01g13800.1  
AT5G61240.1 Orysa4|Os03g11340.1  
AT1G07650.1 Orysa4|Os09g17630.1  
AT5G51560.1,AT2G45340.1 Orysa4|Os06g04370.1,Orysa4|Os08g02440.1  
AT1G80080.1 Orysa4|Os01g43440.1  
AT1G34110.1 Orysa4|Os06g38990.1  
AT3G24982.1,AT3G24900.1,AT3G11010.1,AT1G45616.1,AT3G05370.1,AT4G13920.1,AT2G15080.1,AT3G11080.1,AT1G47890.1,AT5G27060.1,AT3G05660.1,AT3G25010.1  
Orysa4|Os12g12130.1,Orysa4|Os12g11930.1,Orysa4|Os12g12120.1,Orysa4|Os01g06920.1,Orysa4|Os12g12010.1,Orysa4|Os12g11860.1,Orysa4|Os04g40440.1,Orysa4|Os01g06520.1,Orysa4|Os12g10930.1,Orysa4|Os01g06670.1,Orysa4|Os12g11500.1,Orysa4|Os12g11720.1,Orysa4|Os01g06790.1,Orysa4|Os12g10870.1,Orysa4|Os12g11680.1,Orysa4|Os12g11370.1  
AT1G66150.1 Orysa4|Os03g50810.1  
AT5G65830.1,AT3G49750.1 Orysa4|Os09g04490.1  
AT3G57830.1,AT2G42290.1 Orysa4|Os08g39590.1  
AT4G03390.1,AT2G20850.1 Orysa4|Os02g07960.1,Orysa4|Os07g37810.1,Orysa4|Os06g45020.1  
AT2G41820.1 Orysa4|Os07g10630.1  
AT3G12610.1,AT3G20820.1 Orysa4|Os08g39550.1  
AT5G67200.1,AT5G43020.1,AT3G50230.1 Orysa4|Os04g55620.1  
AT2G28960.1,AT1G51800.1,AT4G29990.1,AT2G28990.1,AT1G05700.1,AT3G21340.1,AT1G51790.1,AT2G19210.1,AT2G19190.1,AT5G59650.1,AT2G19230.1  
Orysa4|Os05g44930.1,Orysa4|Os05g44970.1,Orysa4|Os01g03370.1,Orysa4|Os02g05730.1,Orysa4|Os05g44940.1,Orysa4|Os05g44990.1,Orysa4|Os05g44960.1  
AT1G14390.1,AT2G02780.1 Orysa4|Os06g38970.1  
AT1G60630.1 Orysa4|Os02g58390.1  
AT1G78530.1 Orysa4|Os01g14510.1  
AT1G48480.1,AT3G17840.1 Orysa4|Os03g50450.1,Orysa4|Os03g12250.1  
AT3G15410.1 Orysa4|Os02g58030.1  
AT4G18640.1,AT5G45840.1 Orysa4|Os05g48660.1,Orysa4|Os01g48390.1,Orysa4|Os01g10900.1  
AT4G22130.1 Orysa4|Os06g42800.1,Orysa4|Os02g09740.1  
AT2G33050.1,AT5G25910.1,AT3G47090.1,AT5G49660.1,AT5G51350.1,AT2G25790.1,AT1G72300.1,AT4G28490.1,AT4G26540.1,AT2G33060.1,AT1G65380.1,AT4G13810.1,AT2G26330.1,AT2G01950.1,AT3G28890.1,AT4G04220.1,AT1G17240.1,AT5G44700.1,AT2G34930.1,AT3G23120.1,AT5G20480.1,AT3G24240.1,AT4G20140.1,AT1G71390.1,AT3G47570.1,AT2G02220.1,AT5G56040.2,AT5G07280.1,AT1G09970.2,AT1G55610.1  
Orysa4|Os11g36150.1,Orysa4|Os11g35810.1,Orysa4|Os04g15660.1,Orysa4|Os02g12910.1,Orysa4|Os11g07230.1,Orysa4|Os02g12400.1,Orysa4|Os02g13430.1,Orysa4|Os11g47290.1,Orysa4|Os06g10230.1,Orysa4|Os02g13780.1,Orysa4|Os02g06070.1,Orysa4|Os01g12790.1,Orysa4|Os01g05960.1,Orysa4|Os11g07140.1,Orysa4|Os11g07060.1,Orysa4|Os02g12450.1,Orysa4|Os11g47240.1,Orysa4|Os06g38490.1,Orysa4|Os11g07270.1,Orysa4|Os06g36270.1,Orysa4|Os04g57660.1,Orysa4|Os06g23190.1,Orysa4|Os02g30540.1,Orysa4|Os10g33060.1,Orysa4|Os11g09130.1,Orysa4|Os08g34650.1,Orysa4|Os02g12420.1,Orysa4|Os02g06600.1,Orysa4|Os06g38780.1,Orysa4|Os10g02500.1,Orysa4|Os11g36190.1,Orysa4|Os12g42520.1,Orysa4|Os10g22860.1,Orysa4|Os03g21730.1,Orysa4|Os11g47180.1,Orysa4|Os10g33110.1,Orysa4|Os01g41750.1,Orysa4|Os11g10310.1,Orysa4|Os06g03970.1,Orysa4|Os11g07210.1,Orysa4|Os02g06210.1,Orysa4|Os02g41890.1,Orysa4|Os02g06180.1,Orysa4|Os06g08154.1,Orysa4|Os11g36180.1,Orysa4|Os05g40050.1,Orysa4|Os11g36160.1,Orysa4|Os11g46960.1,Orysa4|Os06g04810.1,Orysa4|Os03g56270.1,Orysa4|Os10g06740.1,Orysa4|Os02g12940.1,Orysa4|Os11g47210.1,Orysa4|Os06g45630.1,Orysa4|Os11g36120.1,Orysa4|Os06g38670.1,Orysa4|Os02g40180.1,Orysa4|Os02g06180.1,Orysa4|Os06g16070.1,Orysa4|Os02g05940.1,Orysa4|Os02g05980.1,Orysa4|Os05g51740.1,Orysa4|Os10g38450.1,Orysa4|Os02g05920.1,Orysa4|Os11g46980.1,Orysa4|Os03g12730.1,Orysa4|Os02g12030.1,Orysa4|Os11g12530.1,Orysa4|Os02g06130.1,Orysa4|Os02g06620.1,Orysa4|Os11g47160.1,Orysa4|Os04g15630.1,Orysa4|Os11g07260.1,Orysa4|Os05g44770.1,Orysa4|Os08g28870.1,Orysa4|Os11g07160.1,Orysa4|Os02g06260.1,Orysa4|Os02g42370.1,Orysa4|Os06g38590.1,Orysa4|Os02g39100.1,Orysa4|Os01g05640.1,Orysa4|Os04g57630.1,Orysa4|Os01g05870.1,Orysa4|Os02g40200.1,Orysa4|Os09g15700.1,Orysa4|Os07g03000.1,Orysa4|Os08g14950.1,Orysa4|Os11g07260.1,Orysa4|Os02g06200.1,Orysa4|Os01g53920.1,Orysa4|Os07g31500.1,Orysa4|Os07g01710.1,Orysa4|Os06g38930.1,Orysa4|Os11g12620.1,Orysa4|Os11g07170.1,Orysa4|Os11g07240.1,Orysa4|Os11g46970.1,Orysa4|Os05g07740.1,Orysa4|Os04g14570.1,Orysa4|Os10g13970.1,Orysa4|Os04g04330.1,Orysa4|Os02g06190.1,Orysa4|Os07g03990.1,Orysa4|Os06g38730.1,Orysa4|Os02g05910.1  
AT2G31880.1 Orysa4|Os06g18000.1  
AT2G37050.3 Orysa4|Os11g01200.1,Orysa4|Os12g01200.1  
AT1G67510.1 Orysa4|Os12g13300.1,Orysa4|Os11g19480.1  
AT3G03770.1 Orysa4|Os03g57780.1,Orysa4|Os07g07230.1  
AT2G01210.1,AT1G25320.1 Orysa4|Os01g33090.1  
AT3G25670.1,AT1G68780.1,AT1G13230.1 Orysa4|Os01g02060.1  
AT5G46330.1 Orysa4|Os04g52780.1  
AT4G03010.1,AT1G03440.1 Orysa4|Os05g33690.1  
AT5G13290.1 Orysa4|Os01g70260.1  
AT4G23740.1 Orysa4|Os01g12390.1  
AT4G18760.1,AT5G45770.1 Orysa4|Os01g54630.1  
AT2G16250.1,AT4G39270.1 Orysa4|Os07g04220.1,Orysa4|Os03g51440.1  
AT5G49770.1,AT5G49760.1,AT5G49780.1 Orysa4|Os12g10740.1,Orysa4|Os11g14050.1  
AT5G65240.1,AT5G10290.1 Orysa4|Os03g49620.1,Orysa4|Os02g18320.1  
AT3G28450.1,AT1G27190.1,AT1G69990.1 Orysa4|Os04g41030.1  
AT3G13380.1 Orysa4|Os08g25380.1,Orysa4|Os09g12240.1  
AT5G61570.1,AT5G07620.1 Orysa4|Os02g43870.1,Orysa4|Os04g46320.1  
AT4G29240.1,AT2G19780.1 Orysa4|Os05g09640.1  
AT2G35620.1,AT1G31420.1 Orysa4|Os03g16010.1

AT5G58300.1 Orysa4|Os01g60330.1,Orysa4|Os05g40200.1  
AT2G24230.1 Orysa4|Os08g17410.1  
AT5G41180.1,AT1G63430.1 Orysa4|Os04g58700.1  
AT5G66330.1 Orysa4|Os02g43250.1  
AT5G14210.1 Orysa4|Os11g20360.1  
AT5G45780.1 Orysa4|Os02g14120.1  
AT5G62710.1 Orysa4|Os12g44090.1  
AT1G73070.1  
AT5G01950.1  
AT5G37450.1  
AT3G53590.1  
AT1G08590.1  
AT1G69270.1,AT5G10020.1,AT3G02130.1  
AT1G17250.1  
AT3G19700.1  
AT1G07390.1,AT1G58190.1  
AT1G54480.1  
AT2G36570.1  
AT5G65710.1  
AT1G13910.1  
AT1G29750.2,AT1G29730.1,AT3G14840.2,AT1G29740.1,AT1G53440.1,AT1G53420.1  
AT1G53430.1  
AT4G22730.1  
AT2G33020.1,AT5G40170.1,AT4G13880.1,AT2G32680.1,AT3G05650.1,AT3G25020.1,AT3G05360.1,AT3G23110.1  
AT3G23010.1  
AT1G24650.1,AT2G01820.1  
AT3G23750.1  
AT1G34290.1  
AT1G11130.1  
AT5G12940.1  
AT4G20450.1,AT1G51830.1,AT1G51910.1,AT3G46350.1,AT2G14440.1,AT3G46420.1,AT5G16900.1,AT2G29000.1,AT1G51850.1,AT5G59670.1,AT1G49100.1,AT1G51810.1,AT1G07550.1,AT3G46330.1,AT2G14510.1,AT5G59660.1,AT1G07560.1,AT1G51805.1,AT1G51890.1,AT1G51870.1,AT1G51860.1,AT2G04300.1,AT1G51820.1,AT5G59680.1,AT3G46370.1,AT3G46340.1,AT3G46400.1,AT1G51880.1  
AT1G51840.1,AT4G29450.1,AT4G29180.1  
AT2G28970.1  
AT3G02880.1,AT5G16590.1  
AT5G07150.1,AT5G58540.1  
AT5G06820.1  
AT1G33590.1,AT5G07180.1,AT1G33600.1,AT2G26380.1,AT5G48940.1,AT5G65700.1  
AT5G39390.1  
AT1G74200.1,AT5G62230.1  
AT5G23400.1  
AT5G48740.1  
AT1G67720.1  
AT5G63410.1  
AT1G66830.1  
AT3G17640.1  
AT5G53320.1  
AT1G64210.1  
AT5G41680.1  
AT5G24100.1  
AT5G49750.1  
AT5G63710.1  
AT5G05160.1  
AT3G08680.1  
AT5G58150.1  
AT2G15320.1,AT3G59510.1  
Orysa4|Os05g41230.1  
Orysa4|Os03g32580.1  
Orysa4|Os05g07850.1  
Orysa4|Os10g33040.1  
Orysa4|Os02g17710.1,Orysa4|Os02g12040.1  
Orysa4|Os10g03050.1  
Orysa4|Os10g33080.1  
Orysa4|Os02g34770.1  
Orysa4|Os10g06760.1  
Orysa4|Os08g39940.1,Orysa4|Os09g31450.1,Orysa4|Os07g38130.1  
Orysa4|Os03g32180.1  
Orysa4|Os05g40270.1  
Orysa4|Os01g60280.1  
Orysa4|Os06g08680.1  
Orysa4|Os01g19160.1,Orysa4|Os01g33110.1,Orysa4|Os02g34790.1  
Orysa4|Os01g65650.1  
Orysa4|Os02g13420.1,Orysa4|Os04g03210.1,Orysa4|Os11g36200.1,Orysa4|Os06g36310.1,Orysa4|Os08g16580.1,Orysa4|Os11g12560.1,Orysa4|Os11g07250.1,Orysa4|Os02g13410.1,Orysa4|Os11g07110.1,Orysa4|Os03g05140.1,Orysa4|Os10g18990.1  
Orysa4|Os02g17730.1  
Orysa4|Os04g15530.1  
Orysa4|Os03g01410.1  
Orysa4|Os04g55440.1  
Orysa4|Os04g03180.1



g22470.1 Orysa4|Os05g16930.1,Orysa4|Os04g52590.1,Orysa4|Os04g52614.1,Orysa4|Os04g52600.1,Orysa4|Os04  
 Orysa4|Os05g16420.1,Orysa4|Os05g16920.1,Orysa4|Os05g17800.1,Orysa4|Os05g18090.1  
 Orysa4|Os06g07130.1  
 Orysa4|Os08g10130.1  
 Orysa4|Os10g05560.1  
 Orysa4|Os01g60060.1,Orysa4|Os05g40770.1  
 Orysa4|Os05g24010.1  
 Orysa4|Os01g51400.1  
 Orysa4|Os05g14030.1  
 Orysa4|Os07g38640.1  
 Orysa4|Os03g44260.1  
 Orysa4|Os10g24850.1  
 Orysa4|Os01g66810.1  
 Orysa4|Os10g03420.1,Orysa4|Os03g28270.1  
 Orysa4|Os11g01620.1,Orysa4|Os12g01700.1  
 Orysa4|Os08g38630.1  
 Orysa4|Os12g11940.1,Orysa4|Os01g06720.1  
 Orysa4|Os01g04070.1,Orysa4|Os01g07280.1  
 Orysa4|Os04g28210.1  
 Orysa4|Os10g22920.1  
 Orysa4|Os03g48880.1  
 Orysa4|Os04g58910.1  
 Orysa4|Os05g06240.1  
 Orysa4|Os01g43190.1  
 g18230.1 Orysa4|Os09g19180.1,Orysa4|Os09g19140.1,Orysa4|Os09g19360.1,Orysa4|Os09g18000.1,Orysa4|Os09  
 Orysa4|Os08g40650.1,Orysa4|Os05g15720.1  
 Orysa4|Os09g18550.1,Orysa4|Os09g18594.1,Orysa4|Os05g44950.1,Orysa4|Os01g59570.1,Orysa4|Os05  
 g45000.1 Orysa4|Os09g19350.1  
 Orysa4|Os09g18040.1,Orysa4|Os01g59550.1  
 Orysa4|Os09g22300.1,Orysa4|Os09g18030.1,Orysa4|Os05g45010.1  
 Orysa4|Os04g38910.1  
 Orysa4|Os08g33090.1,Orysa4|Os09g23570.1  
 Orysa4|Os12g33600.1  
 Orysa4|Os06g07590.1  
 Orysa4|Os03g18370.1  
 Orysa4|Os02g10110.1  
 Orysa4|Os07g02450.1,Orysa4|Os01g41780.1,Orysa4|Os11g47310.1,Orysa4|Os02g11930.1,Orysa4|Os11  
 g40840.1,Orysa4|Os02g06240.1,Orysa4|Os06g47760.1,Orysa4|Os08g42840.1,Orysa4|Os02g06270.1,Orysa4|Os11g  
 40810.1,Orysa4|Os05g07820.1,Orysa4|Os01g49920.1,Orysa4|Os07g28300.1,Orysa4|Os06g38760.1,Orysa4|Os12g0  
 6110.1,Orysa4|Os06g38640.1,Orysa4|Os01g06820.1,Orysa4|Os07g14820.1,Orysa4|Os08g24310.1,Orysa4|Os01g07  
 560.1,Orysa4|Os11g35490.1,Orysa4|Os02g34800.1,Orysa4|Os02g10100.1,Orysa4|Os11g07120.1,Orysa4|Os06g477  
 10.1,Orysa4|Os11g35890.1,Orysa4|Os01g06836.1,Orysa4|Os07g28570.1,Orysa4|Os11g35410.1,Orysa4|Os11g47000  
 .1,Orysa4|Os11g40890.1,Orysa4|Os11g35660.1,Orysa4|Os10g22930.1,Orysa4|Os08g14960.1,Orysa4|Os11g35500.1,  
 Orysa4|Os01g41930.1,Orysa4|Os04g15650.1,Orysa4|Os02g05960.1,Orysa4|Os02g39660.1,Orysa4|Os02g40130.1,O  
 rysa4|Os11g36020.1,Orysa4|Os11g35450.1,Orysa4|Os11g10720.1,Orysa4|Os11g36000.1,Orysa4|Os02g13460.1,Ory  
 sa4|Os06g04830.1,Orysa4|Os03g53090.1,Orysa4|Os01g41770.1,Orysa4|Os02g05970.1,Orysa4|Os10g33140.1,Orysa  
 4|Os11g35850.1,Orysa4|Os11g35980.1,Orysa4|Os11g40970.1,Orysa4|Os01g49910.1,Orysa4|Os06g04840.1,Orysa4  
 |Os08g14940.1,Orysa4|Os11g36090.1,Orysa4|Os11g35840.1,Orysa4|Os06g38650.1,Orysa4|Os10g19160.1,Orysa4|O  
 s02g06220.1,Orysa4|Os01g06890.1,Orysa4|Os02g40190.1,Orysa4|Os02g39670.1  
 Orysa4|Os11g07130.1  
 Orysa4|Os02g17400.1  
 Orysa4|Os04g13640.1  
 Orysa4|Os10g23030.1  
 Orysa4|Os02g12440.1  
 Orysa4|Os01g05940.1,Orysa4|Os02g53720.1  
 Orysa4|Os10g02870.1  
 Orysa4|Os01g41910.1  
 Orysa4|Os11g07190.1  
 Orysa4|Os03g13940.1,Orysa4|Os01g74550.1  
 Orysa4|Os06g38830.1  
 Orysa4|Os02g06280.1  
 Orysa4|Os02g16790.1  
 Orysa4|Os03g56250.1  
 Orysa4|Os10g05570.1  
 Orysa4|Os11g39370.1  
 Orysa4|Os05g33160.1  
 Orysa4|Os03g21510.1,Orysa4|Os07g48310.1  
 AT2G01918.1 Orysa4|Os04g44200.1  
 AT4G05180.1,AT4G21280.2 Orysa4|Os07g36080.1  
 AT2G42030.1,AT3G58030.1 Orysa4|Os01g61420.1,Orysa4|Os05g39380.1,Orysa4|Os08g06510.1  
 AT2G44410.1  
 AT5G55600.1 Orysa4|Os07g41640.1  
 AT1G73570.1,AT1G18260.1 Orysa4|Os03g15350.1  
 AT3G59500.1,AT1G30890.1 Orysa4|Os04g08320.1  
 AT1G72660.1,AT1G17470.1 Orysa4|Os05g28940.1  
 AT4G39520.1 Orysa4|Os07g43470.1  
 AT2G43140.1,AT1G05805.1 Orysa4|Os01g67480.1  
 Orysa4|Os04g41229.1,Orysa4|Os02g39140.1  
 AT4G34680.1,AT3G60530.1,AT4G36240.1,AT2G45050.1,AT4G32890.1,AT3G24050.1,AT5G25830.1,AT5G66320.1,A

T3G51080.1 Orysa4|Os03g05160.1  
AT5G56860.1,AT4G26150.1 Orysa4|Os02g12790.1,Orysa4|Os06g37450.1  
AT2G18380.1,AT4G36620.1,AT3G50870.1 Orysa4|Os05g49280.1,Orysa4|Os01g47360.1,Orysa4|Os05g50270.1  
AT3G06740.1,AT5G49300.1 Orysa4|Os01g74540.1  
AT5G26930.1 Orysa4|Os05g06340.1,Orysa4|Os01g24070.1  
AT3G54810.1,AT1G08010.1 Orysa4|Os02g56250.1,Orysa4|Os01g54210.1  
AT3G20750.1  
AT2G28340.1,AT1G08000.1  
Orysa4|Os02g43150.1  
Orysa4|Os12g07120.1  
Orysa4|Os10g32070.1  
Orysa4|Os10g40810.1  
Orysa4|Os11g08410.1,Orysa4|Os03g03850.1  
Orysa4|Os12g42970.1  
AT1G34070.1,AT5G48050.1  
Orysa4|Os08g39720.1,Orysa4|Os12g02770.1,Orysa4|Os05g31590.1,Orysa4|Os06g41190.1,Orysa4|Os06g20460.1,Orysa4|Os12g26370.1,Orysa4|Os03g32540.1,Orysa4|Os06g20520.1  
Orysa4|Os01g65300.1  
AT5G54310.1 Orysa4|Os07g37650.1  
AT3G17660.1  
AT4G30380.1 Orysa4|Os09g29740.1,Orysa4|Os09g29710.1,Orysa4|Os09g29690.1,Orysa4|Os06g47360.1  
AT2G18660.1  
Orysa4|Os06g47390.1,Orysa4|Os08g37930.1  
AT2G35490.1 Orysa4|Os10g42500.1  
AT4G22240.1,AT4G04020.1 Orysa4|Os09g04790.1  
AT3G60580.1,AT2G45120.1,AT1G02030.1 Orysa4|Os04g46680.1,Orysa4|Os02g44130.1,Orysa4|Os10g40660.1  
AT5G61470.1  
AT4G16610.1  
Orysa4|Os03g31240.1  
AT2G45700.1 Orysa4|Os09g26760.1  
AT3G26680.1 Orysa4|Os04g32930.1  
AT5G49960.1 Orysa4|Os01g64980.1  
Orysa4|Os03g62650.1  
AT1G30470.1 Orysa4|Os04g52940.1,Orysa4|Os01g40340.1,Orysa4|Os05g51490.1  
AT2G28360.1,AT1G07990.1,AT3G45190.1  
Orysa4|Os01g40390.1  
AT5G15410.1 Orysa4|Os03g55100.1  
AT5G54250.1 Orysa4|Os01g57370.1  
AT1G15990.1,AT5G57940.1,AT1G19780.1,AT2G23980.1,AT4G30560.1  
Orysa4|Os12g28260.1,Orysa4|Os03g44440.1  
AT1G01340.1,AT4G01010.1,AT5G53130.1,AT2G46430.1 Orysa4|Os06g33570.1  
AT3G17690.1,AT3G17700.1 Orysa4|Os06g10580.1,Orysa4|Os02g53340.1  
AT2G28260.1 Orysa4|Os02g41710.1  
AT3G48010.1,AT2G24610.1,AT4G30360.1,AT5G14870.1 Orysa4|Os09g38580.1  
AT2G46440.1,AT2G46450.1  
Orysa4|Os04g55080.1  
Orysa4|Os06g33610.1,Orysa4|Os02g15580.1  
Orysa4|Os02g54760.1,Orysa4|Os06g08850.1  
Orysa4|Os12g06570.1  
AT5G46860.1,AT4G17730.1 Orysa4|Os01g15110.1  
AT1G32270.1  
AT5G16830.1  
Orysa4|Os02g47440.1  
AT5G17780.1,AT5G17720.1 Orysa4|Os07g48610.1  
AT1G64670.1,AT4G24140.1 Orysa4|Os10g38860.1,Orysa4|Os06g04169.1  
AT5G41900.1  
AT1G01380.1,AT5G53200.1,AT2G30420.1,AT4G01060.1,AT2G46410.1,AT2G30432.1 Orysa4|Os01g43180.1  
AT1G80570.2  
Orysa4|Os12g33220.1,Orysa4|Os04g30210.1,Orysa4|Os04g30200.1,Orysa4|Os12g34220.1,Orysa4|Os12g33230.1,Orysa4|Os12g33210.1  
Orysa4|Os04g30320.1,Orysa4|Os04g30230.1  
Orysa4|Os04g30180.1,Orysa4|Os02g55540.1  
Orysa4|Os02g55550.1  
AT4G14305.1 Orysa4|Os08g45210.1  
Orysa4|Os02g13270.1  
AT1G36160.1 Orysa4|Os10g21910.1,Orysa4|Os05g22940.1  
AT1G36180.1  
AT5G05980.1 Orysa4|Os03g02030.1,Orysa4|Os10g35940.1  
AT3G55630.3  
AT3G10160.1  
AT3G46740.1 Orysa4|Os03g16440.1  
AT4G09080.1  
AT1G35860.1  
AT1G35880.1  
Orysa4|Os11g02460.1  
AT3G16857.2,AT4G16110.1 Orysa4|Os03g12350.1  
AT2G25180.1,AT4G31920.1 Orysa4|Os02g55320.1,Orysa4|Os06g08440.1,Orysa4|Os02g08500.1  
AT2G20570.1 Orysa4|Os06g24070.1,Orysa4|Os01g13740.1  
AT5G59570.1,AT3G46640.1 Orysa4|Os01g74020.1  
AT2G40970.1,AT5G05090.1,AT3G10760.1 Orysa4|Os05g34110.1  
AT1G49190.1,AT5G07210.1  
AT2G27070.1,AT2G01760.1

AT1G67710.1  
AT5G58080.1  
AT1G68210.1  
AT3G62670.1  
AT4G00760.1  
AT5G49240.1  
AT5G44190.1  
AT4G18020.1  
Orysa4|Os05g32880.1  
Orysa4|Os05g32890.1  
Orysa4|Os10g32600.1,Orysa4|Os06g43910.1  
Orysa4|Os01g62660.1  
AT3G55580.1 Orysa4|Os05g38270.1,Orysa4|Os01g62810.1  
AT3G53830.1  
AT1G10500.1 Orysa4|Os06g05400.1  
AT1G53210.1 Orysa4|Os01g11414.1  
AT2G34030.1,AT1G29020.1,AT2G34020.1  
Orysa4|Os02g14980.1  
AT2G44300.1,AT2G44290.1 Orysa4|Os07g09970.1,Orysa4|Os03g07100.1  
AT3G58550.1  
AT1G55260.1  
Orysa4|Os03g58940.1  
AT3G55850.2 Orysa4|Os01g72350.1  
AT1G29840.1,AT3G47590.1,AT3G47560.2,AT2G19550.1  
Orysa4|Os05g46210.1,Orysa4|Os01g39800.1,Orysa4|Os01g39790.1  
AT5G11910.1  
AT1G36280.1,AT4G18440.1 Orysa4|Os03g19930.1  
AT3G60880.2,AT2G45440.1 Orysa4|Os04g48540.1,Orysa4|Os04g18200.1  
AT1G77300.1 Orysa4|Os02g34850.1  
AT5G19240.1,AT5G19250.1,AT5G19230.1,AT3G06035.1 Orysa4|Os07g45060.1  
AT1G54860.1  
AT2G35010.1,AT1G31020.1 Orysa4|Os06g45510.1  
AT3G08710.1 Orysa4|Os05g07690.1,Orysa4|Os01g07376.1  
AT3G17880.1 Orysa4|Os09g23650.1  
AT4G22670.1 Orysa4|Os02g01030.1  
AT3G02730.1,AT5G16400.1 Orysa4|Os01g68480.1  
AT1G45145.1,AT1G19730.1 Orysa4|Os07g08840.1  
AT1G11530.1 Orysa4|Os04g53740.1  
AT5G39950.1 Orysa4|Os07g09310.1,Orysa4|Os03g58630.1  
AT3G56420.1,AT2G40790.1  
AT3G53220.1  
AT5G42980.1,AT3G51030.1  
AT1G69880.1,AT1G59730.1  
Orysa4|Os05g40190.1  
Orysa4|Os01g14850.1  
Orysa4|Os12g18220.1  
Orysa4|Os09g38670.1  
AT2G42380.2,AT3G58120.1 Orysa4|Os01g11350.1  
Orysa4|Os01g55150.1  
AT5G51080.1,AT1G24090.1 Orysa4|Os08g08050.1  
AT3G01410.1  
Orysa4|Os06g13010.1  
AT2G33470.1 Orysa4|Os02g40890.1  
Orysa4|Os04g35790.1,Orysa4|Os07g26460.1  
AT1G48350.1 Orysa4|Os03g61260.1  
AT5G67030.1 Orysa4|Os04g37619.1  
AT4G08520.1,AT3G09800.1 Orysa4|Os02g21250.1  
AT1G60970.1  
Orysa4|Os01g62150.1,Orysa4|Os05g38610.1  
AT1G54385.1 Orysa4|Os11g37100.1  
AT3G03970.1  
Orysa4|Os12g42960.1  
AT5G55070.1,AT4G26910.1 Orysa4|Os02g31040.1,Orysa4|Os04g32330.1  
AT1G04570.1,AT2G33280.1 Orysa4|Os07g24230.1  
AT1G64890.1 Orysa4|Os05g32320.1  
AT5G10820.1 Orysa4|Os09g25560.1  
AT1G78280.1 Orysa4|Os03g27250.1  
AT5G63420.1 Orysa4|Os02g33610.1  
AT1G04640.1 Orysa4|Os03g20560.1  
AT1G18950.1 Orysa4|Os07g09580.1  
AT5G25580.1  
Orysa4|Os01g08550.1  
Orysa4|Os03g58820.1  
AT4G31210.1 Orysa4|Os06g16980.1  
Orysa4|Os02g27440.1  
AT4G21450.1,AT4G05060.1 Orysa4|Os07g37270.1  
Orysa4|Os08g04620.1  
AT3G14880.1 Orysa4|Os05g48650.1  
Orysa4|Os01g06560.1  
AT3G48420.1 Orysa4|Os03g36750.1  
AT4G39970.1 Orysa4|Os08g37940.1  
AT3G25800.1,AT1G13320.1 Orysa4|Os09g07510.1

AT1G25490.1  
AT2G36410.1,AT3G09980.1,AT3G52920.1,AT5G03660.1 Orysa4|Os04g33450.1,Orysa4|Os02g32650.1  
AT2G27740.1  
AT2G36355.1,AT3G52900.1  
AT3G46540.1 Orysa4|Os01g62370.1  
AT1G08670.1  
Orysa4|Os08g45230.1  
AT5G53530.1,AT4G27690.1 Orysa4|Os11g41130.1,Orysa4|Os12g31640.1  
Orysa4|Os03g47560.1  
AT3G19895.1 Orysa4|Os02g58280.1  
AT2G40640.1,AT5G05230.1  
AT2G18950.1 Orysa4|Os06g44840.1  
Orysa4|Os06g43880.1  
Orysa4|Os06g44790.1  
AT1G02080.1 Orysa4|Os10g40780.1  
Orysa4|Os03g01240.1  
AT4G09340.1,AT1G35470.2 Orysa4|Os02g35070.1  
AT4G09250.1,AT4G09200.1,AT4G09310.1  
AT5G23040.1 Orysa4|Os09g21250.1,Orysa4|Os08g32130.1  
AT3G51140.1  
AT5G04740.1 Orysa4|Os12g05650.1  
AT1G16880.1 Orysa4|Os08g14440.1  
AT5G47010.1 Orysa4|Os07g31340.1  
AT5G37150.1,AT5G37030.1 Orysa4|Os02g45900.1,Orysa4|Os04g49270.1  
AT4G15570.1 Orysa4|Os06g20500.1,Orysa4|Os04g34670.1,Orysa4|Os03g32526.1  
AT4G30100.1,AT2G19120.1,AT1G16800.1  
Orysa4|Os11g42900.1,Orysa4|Os11g42910.1  
Orysa4|Os01g34830.1  
AT2G20240.1,AT4G28760.1,AT5G43880.1 Orysa4|Os02g40410.1,Orysa4|Os04g42770.1,Orysa4|Os03g04990.1  
AT3G53540.1 Orysa4|Os03g17210.1  
Orysa4|Os02g57140.1  
AT3G09140.1,AT3G09110.1,AT5G37320.1,AT5G43240.1,AT5G01130.1,AT5G01120.1,AT5G01150.1  
Orysa4|Os04g50810.1,Orysa4|Os04g50800.1  
AT5G01140.1,AT3G09120.1  
AT4G24380.1 Orysa4|Os04g37710.1  
AT5G65400.1  
Orysa4|Os07g48770.1  
AT5G19320.1 Orysa4|Os05g46560.1  
AT3G06000.1  
AT3G63130.1  
AT3G55270.1 Orysa4|Os05g02500.1  
AT1G78780.2 Orysa4|Os01g53090.1,Orysa4|Os01g53110.1  
Orysa4|Os01g14590.1,Orysa4|Os01g14550.1  
AT1G63770.2 Orysa4|Os08g44860.1  
AT1G66730.1 Orysa4|Os01g49180.1  
AT1G08130.1,AT1G49250.1 Orysa4|Os10g34750.1  
AT5G17360.1  
AT2G46820.1 Orysa4|Os07g28610.1  
AT1G52220.1 Orysa4|Os01g55570.1  
Orysa4|Os10g39150.1  
AT5G59910.1,AT3G46030.1,AT5G22880.1,AT1G07790.1,AT3G45980.1,AT2G28720.1  
Orysa4|Os01g05970.1,Orysa4|Os01g05900.1,Orysa4|Os01g05610.1,Orysa4|Os01g05990.1,Orysa4|Os03g17084.1,Orysa4|Os01g05950.1,Orysa4|Os05g49860.1,Orysa4|Os01g06010.1,Orysa4|Os01g05630.1,Orysa4|Os08g38300.1  
Orysa4|Os01g31810.1  
AT2G22690.1,AT4G37880.1 Orysa4|Os06g38940.1  
AT5G09630.1  
AT5G06810.1 Orysa4|Os08g40630.1  
AT3G60400.1 Orysa4|Os07g22670.1  
AT5G45113.1,AT4G19650.1  
AT3G61580.1,AT2G46210.1 Orysa4|Os09g16920.1  
AT2G37940.1,AT3G54020.1 Orysa4|Os05g37910.1,Orysa4|Os01g63060.1  
AT2G29525.1  
Orysa4|Os05g21180.1  
AT1G59650.1,AT1G10410.1 Orysa4|Os03g48660.1  
AT3G51430.1,AT3G51440.1,AT3G51420.1,AT3G51450.1 Orysa4|Os10g39710.1  
AT5G40850.1 Orysa4|Os01g44050.1  
AT5G06290.1,AT3G11630.1 Orysa4|Os02g33450.1  
Orysa4|Os04g33970.1  
AT3G59180.1,AT1G48390.1,AT5G38386.1,AT3G59170.1,AT2G29930.1,AT3G59210.1,AT4G14096.1,AT1G47920.1,AT5G15620.1,AT3G58880.1,AT5G41830.1,AT1G21990.1,AT3G59230.1,AT3G58820.1,AT3G03030.1,AT5G38396.1,AT3G58920.1,AT1G52650.1,AT4G00320.1,AT3G54160.1,AT1G58310.1,AT4G14103.1,AT3G58900.1,AT3G59150.1,AT3G58960.1,AT3G60040.1,AT1G64540.1,AT5G41630.1,AT3G03040.1,AT1G06630.1,AT3G59240.1,AT3G44090.1,AT3G59190.1,AT3G58890.1,AT4G27050.1,AT3G59160.1,AT4G22280.1,AT3G59200.1,AT2G29910.1,AT5G38390.1,AT2G42720.1,AT3G58950.1,AT1G56610.1,AT3G44810.1,AT4G13960.1,AT3G62440.1,AT3G62430.1,AT3G44060.1,AT5G35995.1,AT3G42770.1,AT5G41840.1,AT3G58860.1,AT5G40050.1,AT5G25860.1,AT3G58930.1,AT3G58940.1,AT3G49150.1,AT1G48400.1,AT3G59250.1,AT3G59000.1 Orysa4|Os01g57920.1  
AT3G05940.1,AT5G26740.1 Orysa4|Os03g61210.1,Orysa4|Os07g14090.1  
AT2G20830.2 Orysa4|Os06g03740.1  
Orysa4|Os07g34610.1  
Orysa4|Os06g02610.1  
Orysa4|Os03g38540.1

AT4G25700.1,AT5G52570.1 Orysa4|Os03g03370.1,Orysa4|Os10g38940.1,Orysa4|Os04g48880.1  
AT5G23670.1,AT3G48780.1 Orysa4|Os11g31640.1  
AT3G48790.1  
Orysa4|Os01g70360.1  
AT1G42430.1 Orysa4|Os03g04100.1  
AT3G55760.1 Orysa4|Os11g37560.1  
AT1G74450.1,AT1G43630.1,AT1G18740.1 Orysa4|Os12g06780.1,Orysa4|Os11g06440.1  
AT1G63930.1,AT4G23530.1  
Orysa4|Os04g59140.1  
AT5G12050.1,AT3G13980.1,AT1G54200.1 Orysa4|Os10g25810.1,Orysa4|Os03g07920.1  
AT3G42800.1  
Orysa4|Os09g27160.1  
AT1G49920.1,AT1G64260.1,AT1G64255.1  
Orysa4|Os06g36470.1,Orysa4|Os01g09490.1,Orysa4|Os07g18060.1,Orysa4|Os07g05140.1,Orysa4|Os06g04770.1,Orysa4|Os01g06300.1,Orysa4|Os09g30370.1,Orysa4|Os01g21840.1,Orysa4|Os07g17240.1,Orysa4|Os06g21610.1,Orysa4|Os04g56380.1,Orysa4|Os10g24790.1,Orysa4|Os09g37820.1,Orysa4|Os01g46660.1,Orysa4|Os11g44410.1,Orysa4|Os01g51180.1,Orysa4|Os06g42640.1,Orysa4|Os10g36380.1,Orysa4|Os11g06380.1,Orysa4|Os07g40650.1,Orysa4|Os03g46830.1,Orysa4|Os02g56390.1,Orysa4|Os02g06000.1,Orysa4|Os11g05220.1,Orysa4|Os12g16500.1,Orysa4|Os01g73870.1,Orysa4|Os05g47710.1,Orysa4|Os06g06110.1,Orysa4|Os11g33080.1,Orysa4|Os01g68220.1,Orysa4|Os03g13710.1,Orysa4|Os01g53320.1,Orysa4|Os05g43150.1,Orysa4|Os01g47000.1,Orysa4|Os01g61090.1,Orysa4|Os12g40530.1,Orysa4|Os02g30680.1,Orysa4|Os06g44480.1,Orysa4|Os01g41210.1,Orysa4|Os04g09980.1,Orysa4|Os01g71890.1,Orysa4|Os04g30190.1,Orysa4|Os02g04200.1,Orysa4|Os07g30230.1,Orysa4|Os01g02240.1,Orysa4|Os04g17770.1,Orysa4|Os09g32390.1,Orysa4|Os02g45960.1,Orysa4|Os03g63030.1,Orysa4|Os01g63170.1,Orysa4|Os12g31700.1,Orysa4|Os10g02660.1,Orysa4|Os10g30740.1,Orysa4|Os02g03350.1,Orysa4|Os10g27240.1,Orysa4|Os07g05770.1,Orysa4|Os04g38240.1,Orysa4|Os02g02610.1,Orysa4|Os08g05450.1,Orysa4|Os02g27510.1,Orysa4|Os01g28140.1,Orysa4|Os05g26010.1,Orysa4|Os02g14280.1,Orysa4|Os10g42600.1,Orysa4|Os03g01950.1,Orysa4|Os01g18480.1,Orysa4|Os12g38500.1,Orysa4|Os10g18140.1,Orysa4|Os07g12500.1,Orysa4|Os11g25520.1,Orysa4|Os01g68430.1,Orysa4|Os06g50320.1,Orysa4|Os01g36250.1,Orysa4|Os07g12860.1,Orysa4|Os08g26430.1,Orysa4|Os12g30050.1,Orysa4|Os02g04910.1,Orysa4|Os01g35220.1,Orysa4|Os08g39620.1,Orysa4|Os06g12900.1,Orysa4|Os02g05100.1,Orysa4|Os02g45550.1,Orysa4|Os02g39900.1,Orysa4|Os10g23190.1,Orysa4|Os06g37030.1,Orysa4|Os11g44210.1,Orysa4|Os07g42530.1,Orysa4|Os07g35040.1,Orysa4|Os05g28120.1,Orysa4|Os07g44240.1,Orysa4|Os06g14250.1,Orysa4|Os09g38900.1,Orysa4|Os11g46290.1,Orysa4|Os10g36990.1,Orysa4|Os06g14290.1,Orysa4|Os06g22710.1,Orysa4|Os08g42120.1,Orysa4|Os03g53130.1,Orysa4|Os02g34300.1,Orysa4|Os09g25870.1,Orysa4|Os11g13640.1,Orysa4|Os11g43350.1,Orysa4|Os03g03060.1,Orysa4|Os05g41560.1,Orysa4|Os03g32650.1  
AT1G17930.1,AT2G25010.1,AT2G04865.1 Orysa4|Os07g32412.1,Orysa4|Os07g32406.1  
Orysa4|Os07g46650.1,Orysa4|Os03g16620.1,Orysa4|Os04g02350.1,Orysa4|Os12g27390.1,Orysa4|Os02g06110.1,Orysa4|Os04g29600.1,Orysa4|Os05g05990.1,Orysa4|Os02g01620.1,Orysa4|Os05g04480.1,Orysa4|Os07g20240.1,Orysa4|Os02g38360.1,Orysa4|Os03g02140.1,Orysa4|Os06g35800.1,Orysa4|Os11g30170.1,Orysa4|Os03g28204.1,Orysa4|Os03g55690.1,Orysa4|Os12g04670.1,Orysa4|Os12g10800.1,Orysa4|Os01g31900.1,Orysa4|Os03g29900.1,Orysa4|Os03g49540.1,Orysa4|Os01g43970.1,Orysa4|Os09g19860.1,Orysa4|Os02g58240.1,Orysa4|Os11g43660.1,Orysa4|Os02g24280.1,Orysa4|Os04g59390.1,Orysa4|Os01g49950.1,Orysa4|Os01g67990.1,Orysa4|Os06g45030.1,Orysa4|Os04g54060.1,Orysa4|Os01g60880.1,Orysa4|Os01g15650.1,Orysa4|Os09g03180.1,Orysa4|Os02g34550.1,Orysa4|Os07g29650.1,Orysa4|Os11g15170.1,Orysa4|Os04g53480.1,Orysa4|Os06g42230.1,Orysa4|Os07g42980.1,Orysa4|Os03g05790.1,Orysa4|Os04g11910.1,Orysa4|Os08g41130.1,Orysa4|Os11g30390.1,Orysa4|Os06g14840.1,Orysa4|Os05g13800.1,Orysa4|Os11g14510.1,Orysa4|Os07g34310.1,Orysa4|Os02g46230.1,Orysa4|Os02g27520.1  
Orysa4|Os12g21510.1,Orysa4|Os06g19950.1,Orysa4|Os07g45220.1,Orysa4|Os01g40890.1,Orysa4|Os04g31650.1,Orysa4|Os08g16440.1,Orysa4|Os11g40640.1,Orysa4|Os09g01870.1,Orysa4|Os12g05460.1,Orysa4|Os11g25410.1,Orysa4|Os06g37890.1,Orysa4|Os04g27310.1,Orysa4|Os01g74400.1,Orysa4|Os01g35410.1,Orysa4|Os05g32000.1,Orysa4|Os02g46070.1,Orysa4|Os01g62710.1,Orysa4|Os07g45250.1,Orysa4|Os01g23420.1,Orysa4|Os05g40600.1,Orysa4|Os02g45510.1,Orysa4|Os08g25350.1,Orysa4|Os01g26916.1,Orysa4|Os03g04290.1,Orysa4|Os03g47890.1,Orysa4|Os07g45180.1  
Orysa4|Os06g27440.1,Orysa4|Os01g21190.1,Orysa4|Os11g12660.1,Orysa4|Os08g38040.1,Orysa4|Os12g20420.1,Orysa4|Os01g56250.1,Orysa4|Os09g21680.1,Orysa4|Os08g19180.1,Orysa4|Os01g73930.1,Orysa4|Os11g22190.1,Orysa4|Os04g38830.1,Orysa4|Os10g02520.1,Orysa4|Os06g42010.1,Orysa4|Os11g43060.1  
Orysa4|Os03g52740.1  
Orysa4|Os09g22400.1,Orysa4|Os04g02420.1  
AT4G15830.1 Orysa4|Os01g70560.1  
AT5G62300.1,AT3G45030.1,AT3G47370.1 Orysa4|Os03g14530.1,Orysa4|Os10g08930.1  
AT5G66360.2 Orysa4|Os07g32550.1  
AT2G47420.1 Orysa4|Os10g10434.1  
Orysa4|Os08g08270.1  
AT3G10920.1 Orysa4|Os05g25850.1  
AT3G56350.1  
AT1G15930.1,AT2G32060.1 Orysa4|Os07g12650.1,Orysa4|Os07g05580.1  
AT1G23100.1,AT1G14980.1 Orysa4|Os07g44740.1,Orysa4|Os03g25050.1  
AT5G20720.1 Orysa4|Os06g09679.1  
Orysa4|Os09g26730.1  
AT2G30790.1,AT1G06680.1 Orysa4|Os07g04840.1  
AT1G56460.1 Orysa4|Os12g37430.1,Orysa4|Os03g59680.1  
AT3G06660.1,AT2G47350.1  
AT1G10950.1 Orysa4|Os02g34690.1,Orysa4|Os12g07670.1,Orysa4|Os11g07910.1  
AT3G13772.1,AT1G55130.1 Orysa4|Os06g37160.1  
AT1G14670.1,AT2G01970.1 Orysa4|Os03g13380.1,Orysa4|Os10g02350.1  
AT5G35160.1 Orysa4|Os02g55440.1  
AT4G12650.1 Orysa4|Os02g49050.1,Orysa4|Os05g07650.1,Orysa4|Os08g38820.1  
AT2G24170.1,AT5G25100.1,AT5G10840.1 Orysa4|Os09g38530.1,Orysa4|Os08g44100.1,Orysa4|Os08g44090.1  
AT1G08350.1  
AT5G37310.1  
Orysa4|Os08g19160.1  
Orysa4|Os08g44140.1  
Orysa4|Os08g44150.1,Orysa4|Os06g44140.1,Orysa4|Os08g17370.1  
AT4G23710.1,AT3G01390.1 Orysa4|Os04g51270.1

AT4G25950.1  
Orysa4|Os02g47320.1  
AT5G32440.1 Orysa4|Os06g43550.1,Orysa4|Os02g09180.1  
AT5G02510.1  
Orysa4|Os09g03090.1  
Orysa4|Os01g42420.1  
AT1G28510.1 Orysa4|Os01g14020.1  
AT3G58150.1  
Orysa4|Os01g54950.1,Orysa4|Os02g20844.1  
AT1G78680.1,AT1G78670.1,AT1G78660.1 Orysa4|Os05g44130.1  
AT2G21340.1,AT4G39030.1 Orysa4|Os02g02980.1  
AT4G26300.1,AT1G66530.1 Orysa4|Os05g07030.1  
Orysa4|Os01g06510.1  
AT1G13280.1,AT3G25770.1,AT3G25780.1,AT3G25760.1 Orysa4|Os03g32314.1  
AT5G48370.1 Orysa4|Os09g34190.1  
AT2G30720.1  
AT2G32220.1,AT3G22230.1,AT4G15000.1 Orysa4|Os10g41470.1,Orysa4|Os02g18380.1  
AT4G34020.1 Orysa4|Os05g44330.1  
AT1G53280.1,AT3G14990.1 Orysa4|Os06g34040.1,Orysa4|Os01g11860.1  
AT3G54600.1,AT2G38860.2 Orysa4|Os11g37920.1  
AT3G02720.1 Orysa4|Os04g57590.1  
AT5G63270.1,AT3G48450.1 Orysa4|Os02g49340.1,Orysa4|Os06g17870.1  
AT2G17660.1,AT5G40645.1  
AT1G69020.1 Orysa4|Os09g29950.1  
AT5G66960.1  
AT5G61170.1,AT5G15520.1,AT3G02080.1 Orysa4|Os03g31090.1  
AT1G61580.1,AT1G43170.1 Orysa4|Os12g07010.1,Orysa4|Os11g06750.1  
AT1G74470.1 Orysa4|Os02g51080.1  
Orysa4|Os01g16020.1  
AT2G24490.1,AT3G02920.1 Orysa4|Os02g58220.1,Orysa4|Os02g42230.1  
Orysa4|Os06g47830.1  
AT5G65690.1,AT4G37870.1 Orysa4|Os03g15050.1  
Orysa4|Os10g13700.1  
AT4G15940.1,AT3G16700.1 Orysa4|Os03g61330.1  
Orysa4|Os03g30800.1  
AT2G30390.1 Orysa4|Os05g29760.1  
AT5G26030.1 Orysa4|Os09g12560.1  
AT2G04520.1,AT5G35680.1 Orysa4|Os02g19770.1,Orysa4|Os06g23440.1  
AT1G29250.1,AT2G34160.1 Orysa4|Os02g10810.1,Orysa4|Os06g40040.1  
AT3G04620.1  
Orysa4|Os01g07810.1  
AT2G15695.1 Orysa4|Os06g11040.1,Orysa4|Os11g40070.1  
AT5G44250.1  
AT2G20450.1,AT4G27090.1 Orysa4|Os02g40880.1,Orysa4|Os04g43540.1  
AT5G08370.1 Orysa4|Os10g35110.1  
AT3G56310.1 Orysa4|Os07g48160.1  
AT5G08380.1 Orysa4|Os10g35070.1  
Orysa4|Os07g26900.1  
AT1G15240.1 Orysa4|Os05g50660.1  
AT2G15900.1 Orysa4|Os11g06040.1  
AT3G59780.1 Orysa4|Os01g67120.1  
AT4G39870.1 Orysa4|Os02g51770.1,Orysa4|Os06g11790.1  
AT2G05590.2 Orysa4|Os07g25700.1  
AT3G18190.1 Orysa4|Os02g22780.1,Orysa4|Os10g37060.1  
AT3G11830.1 Orysa4|Os06g47320.1  
AT5G20890.1 Orysa4|Os03g42220.1,Orysa4|Os05g48290.1  
AT3G03960.1 Orysa4|Os03g59020.1  
AT5G26360.1 Orysa4|Os02g14929.1,Orysa4|Os06g34690.1  
AT5G16070.1,AT3G02530.1 Orysa4|Os05g05470.1  
AT1G24510.1 Orysa4|Os06g36700.1  
AT4G08640.1  
AT1G67760.1  
Orysa4|Os04g23420.1  
Orysa4|Os06g21620.1  
Orysa4|Os11g36950.1  
AT4G01575.1,AT3G61980.1 Orysa4|Os01g59610.1  
AT5G50300.1 Orysa4|Os11g24060.1  
AT3G10960.1 Orysa4|Os05g26840.1  
Orysa4|Os05g33450.1  
AT5G58560.1 Orysa4|Os01g61560.1,Orysa4|Os12g01480.1,Orysa4|Os11g01450.1  
AT5G04490.1  
AT5G60410.2 Orysa4|Os05g03430.1  
Orysa4|Os03g50980.1  
Orysa4|Os07g25890.1  
AT4G28730.1,AT2G20270.1 Orysa4|Os08g45140.1  
AT4G15690.1,AT3G62930.1,AT1G03020.1,AT5G18600.1,AT4G15670.1,AT4G15680.1,AT4G15660.1,AT4G15700.1  
Orysa4|Os01g70990.1,Orysa4|Os02g30850.1,Orysa4|Os12g35340.1,Orysa4|Os01g26912.1,Orysa4|Os12g35330.1,Orysa4|Os01g27140.1,Orysa4|Os05g05730.1,Orysa4|Os04g32300.1  
AT1G28480.1 Orysa4|Os01g47760.1,Orysa4|Os05g48930.1  
AT5G11930.1,AT4G33040.1 Orysa4|Os01g09830.1,Orysa4|Os05g10930.1  
AT5G40370.1 Orysa4|Os04g42930.1,Orysa4|Os02g40500.1  
AT1G06830.1,AT3G62960.1,AT2G47880.1,AT2G30540.1

AT3G62950.1,AT2G47870.1  
AT3G02000.1,AT5G14070.1  
AT1G03850.1  
AT5G63030.1  
AT4G24050.1,AT1G64590.1 Orysa4|Os03g02460.1,Orysa4|Os06g03830.1  
AT2G37540.1,AT5G02540.1 Orysa4|Os01g05840.1  
AT4G09750.1 Orysa4|Os06g39040.1  
AT5G15940.1,AT5G04070.1 Orysa4|Os09g17750.1  
AT5G50130.1  
Orysa4|Os11g07922.1  
Orysa4|Os10g39990.1  
AT2G27180.1,AT3G11690.1 Orysa4|Os01g15510.1,Orysa4|Os12g42650.1  
AT5G06380.1  
Orysa4|Os03g53930.1  
AT1G04830.1,AT4G13730.1 Orysa4|Os11g28990.1  
Orysa4|Os04g30880.1  
Orysa4|Os01g68010.1  
AT1G69770.1 Orysa4|Os03g12570.1  
AT1G80740.1  
AT4G19020.1  
Orysa4|Os10g01570.1  
AT5G41730.1,AT1G64300.1 Orysa4|Os01g43350.1,Orysa4|Os05g50830.1  
AT1G01450.1  
Orysa4|Os05g34910.1  
AT2G38130.1 Orysa4|Os11g32280.1  
AT1G72810.1,AT4G29840.2 Orysa4|Os05g47640.1  
AT2G41460.1 Orysa4|Os01g58680.1  
Orysa4|Os01g58690.1  
AT3G26935.1,AT5G41060.1 Orysa4|Os08g42370.1,Orysa4|Os01g70100.1,Orysa4|Os09g33450.1  
AT3G56930.1 Orysa4|Os12g03730.1,Orysa4|Os11g03910.1  
AT5G50020.1,AT4G24630.1 Orysa4|Os01g64810.1,Orysa4|Os05g36090.1  
AT3G18620.1 Orysa4|Os06g20400.1  
AT3G04970.1 Orysa4|Os03g24900.1  
AT3G09320.1 Orysa4|Os01g62620.1  
AT5G04270.1 Orysa4|Os02g57370.1  
AT3G48760.1  
AT3G56920.1,AT5G05070.1,AT2G40990.1  
Orysa4|Os08g42620.1  
Orysa4|Os11g32960.1  
Orysa4|Os03g16790.1  
Orysa4|Os08g01300.1  
AT1G63300.1,AT5G41140.1 Orysa4|Os10g36060.1  
AT5G52280.1  
AT5G08450.1 Orysa4|Os07g29450.1  
AT3G25680.1 Orysa4|Os06g30390.1  
AT5G23890.1 Orysa4|Os03g64400.1  
AT5G52410.2  
AT5G44750.1 Orysa4|Os06g47580.1  
AT5G54190.1,AT1G03630.1,AT4G27440.1 Orysa4|Os10g35370.1  
Orysa4|Os04g58200.1  
AT1G21610.1,AT1G77310.1 Orysa4|Os01g66050.1,Orysa4|Os05g34900.1  
AT1G33680.1,AT4G10070.1 Orysa4|Os08g01930.1  
AT5G07300.1,AT5G61900.1 Orysa4|Os02g32160.1  
AT1G08860.1  
Orysa4|Os08g03890.1  
AT5G04170.1,AT3G10300.3 Orysa4|Os12g04240.1,Orysa4|Os11g04480.1  
Orysa4|Os08g44390.1  
AT2G24590.1,AT4G31580.1 Orysa4|Os02g39720.1,Orysa4|Os02g54770.1  
AT1G22840.1,AT4G10040.1 Orysa4|Os05g34770.1  
AT2G21390.1,AT1G62020.1 Orysa4|Os03g50350.1,Orysa4|Os03g50340.1,Orysa4|Os09g04110.1  
AT1G74210.1,AT5G08030.1 Orysa4|Os01g55780.1,Orysa4|Os03g40670.1  
Orysa4|Os07g41150.1  
AT3G07890.1 Orysa4|Os08g25010.1  
AT5G38640.1 Orysa4|Os12g42260.1,Orysa4|Os03g44310.1  
AT1G48970.1  
AT2G44070.1  
AT1G20270.1 Orysa4|Os02g58070.1  
AT3G28480.1,AT3G28490.1 Orysa4|Os10g27340.1,Orysa4|Os03g58890.1  
AT5G18900.1,AT3G06300.1 Orysa4|Os05g41010.1  
AT4G33910.1 Orysa4|Os03g55380.1  
AT2G43080.1 Orysa4|Os04g27850.1  
AT5G66060.1,AT4G35810.1  
AT2G23096.1  
Orysa4|Os10g35470.1  
Orysa4|Os03g06990.1,Orysa4|Os03g07000.1  
Orysa4|Os03g58880.1,Orysa4|Os07g09630.1  
Orysa4|Os01g07920.1  
AT5G08650.1 Orysa4|Os02g06300.1  
AT4G25340.1 Orysa4|Os04g36890.1  
AT3G12340.1  
AT5G05420.1  
Orysa4|Os09g01650.1

Orysa4|Os09g12270.1  
Orysa4|Os09g01670.1  
AT1G74250.1 Orysa4|Os12g31840.1  
AT1G15340.1 Orysa4|Os12g42550.1  
AT3G15790.1  
AT4G32900.1 Orysa4|Os05g44390.1  
AT5G16870.1,AT3G03010.1 Orysa4|Os04g55860.1  
AT4G30200.2,AT5G57380.1 Orysa4|Os02g05840.1  
AT3G24440.1 Orysa4|Os12g34850.1  
AT2G18880.1,AT2G18870.1  
Orysa4|Os08g12430.1  
AT2G31650.1,AT1G05830.1 Orysa4|Os09g04890.1  
AT5G03740.1,AT3G44750.1,AT5G22650.1 Orysa4|Os05g51830.1  
Orysa4|Os01g68160.1,Orysa4|Os01g68104.1  
Orysa4|Os05g51840.1  
AT2G24440.1,AT4G31360.1 Orysa4|Os11g47770.1  
Orysa4|Os05g16170.1  
AT1G02400.1 Orysa4|Os05g06670.1  
AT1G35190.1,AT3G46490.1,AT3G46480.1 Orysa4|Os01g09300.1  
AT5G08640.1,AT5G63590.1 Orysa4|Os02g52840.1  
AT3G49630.1,AT3G50210.1,AT3G49620.1 Orysa4|Os09g07020.1  
AT4G03060.1,AT4G03050.2,AT4G03070.1 Orysa4|Os05g50090.1  
AT1G77330.1 Orysa4|Os11g08380.1,Orysa4|Os05g05680.1  
AT1G17020.1,AT4G25310.1,AT1G78550.1,AT4G25300.1,AT1G17010.1  
Orysa4|Os03g32470.1,Orysa4|Os10g40900.1,Orysa4|Os10g40934.1,Orysa4|Os10g40880.1,Orysa4|Os10g41020.1,Orysa4|Os09g18450.1  
AT2G19590.1 Orysa4|Os06g37590.1  
AT3G19010.1,AT3G19000.1 Orysa4|Os03g42130.1,Orysa4|Os08g15149.1  
AT1G14120.1,AT1G14130.1 Orysa4|Os04g39980.1  
AT4G22880.1 Orysa4|Os01g27490.1,Orysa4|Os06g42130.1  
AT2G34555.1,AT1G78440.1,AT1G30040.1 Orysa4|Os05g48700.1,Orysa4|Os05g43880.1,Orysa4|Os01g55240.1  
AT4G10500.1,AT4G10490.1 Orysa4|Os04g49210.1  
AT4G21200.1 Orysa4|Os07g01340.1,Orysa4|Os02g41954.1,Orysa4|Os04g44150.1  
AT1G62380.1,AT1G05010.1,AT1G12010.1 Orysa4|Os09g27820.1,Orysa4|Os09g27750.1  
AT2G30840.1,AT1G06620.1,AT1G03400.1,AT2G25450.1,AT5G59530.1,AT1G04350.1,AT1G04380.1,AT5G43450.1,AT2G30830.1,AT3G61400.1,AT1G03410.1,AT1G06640.1,AT5G59540.1,AT1G06650.2,AT5G43440.1  
Orysa4|Os04g10350.1  
AT1G52790.1,AT1G80320.1,AT1G52800.1,AT1G52810.1,AT1G28030.1,AT1G52820.1,AT1G15540.1  
Orysa4|Os08g32160.1,Orysa4|Os08g32170.1  
AT3G51240.1 Orysa4|Os04g56700.1  
AT4G16765.1,AT4G16770.1 Orysa4|Os10g37899.1,Orysa4|Os10g37880.1  
AT5G07200.1,AT5G51810.1,AT4G25420.1,AT1G60980.1 Orysa4|Os03g63970.1  
AT4G16330.1 Orysa4|Os06g06720.1  
AT3G21420.1 Orysa4|Os01g70930.1  
AT3G47190.1,AT5G58660.1 Orysa4|Os04g33360.1  
AT2G36690.1 Orysa4|Os08g44590.1,Orysa4|Os09g39720.1  
AT1G80330.1,AT1G80340.1,AT4G21690.1,AT1G15550.1 Orysa4|Os01g08220.1,Orysa4|Os05g08540.1  
AT1G47990.1  
AT3G46500.1  
AT5G63600.2,AT5G43935.1,AT5G63580.1,AT5G63595.1  
AT4G23340.1  
AT4G22870.1  
AT1G50960.1  
AT5G51310.1  
AT1G55290.1  
AT2G44800.1  
AT2G06960.1  
Orysa4|Os01g22920.1  
Orysa4|Os09g07450.1  
Orysa4|Os05g05670.1  
Orysa4|Os03g63900.1,Orysa4|Os01g24980.1,Orysa4|Os01g25010.1  
Orysa4|Os11g03510.1  
Orysa4|Os09g18390.1,Orysa4|Os09g18520.1  
Orysa4|Os09g18470.1  
Orysa4|Os01g39860.1  
Orysa4|Os04g55070.1  
Orysa4|Os02g53180.1  
Orysa4|Os08g30240.1,Orysa4|Os03g64280.1,Orysa4|Os08g30080.1,Orysa4|Os03g48430.1,Orysa4|Os08g30100.1  
Orysa4|Os08g30150.1,Orysa4|Os01g35230.1,Orysa4|Os06g14400.1,Orysa4|Os08g30230.1,Orysa4|Os08g30170.1  
Orysa4|Os04g10300.1  
Orysa4|Os11g16450.1  
Orysa4|Os11g16460.1  
Orysa4|Os07g07420.1  
Orysa4|Os05g34854.1,Orysa4|Os01g66100.1  
Orysa4|Os10g40990.1  
Orysa4|Os08g37456.1  
AT2G13680.1 Orysa4|Os06g08380.1  
AT1G05570.1,AT2G31960.1 Orysa4|Os02g58560.1  
AT4G04970.1,AT4G03550.1 Orysa4|Os01g55040.1  
AT3G07160.1



AT1G06490.1,AT3G59100.1  
AT3G14570.1  
AT5G13000.1  
Orysa4|Os01g33960.1  
Orysa4|Os03g03610.1  
Orysa4|Os06g51270.1  
Orysa4|Os01g48200.1  
AT2G27230.1,AT1G64625.1 Orysa4|Os11g06010.1,Orysa4|Os12g06330.1,Orysa4|Os01g64560.1  
Orysa4|Os02g45170.1  
AT3G26400.1,AT1G13020.1 Orysa4|Os04g40400.1,Orysa4|Os02g38220.1  
AT4G38710.1 Orysa4|Os02g24330.1  
Orysa4|Os11g30320.1  
Orysa4|Os01g19990.1  
AT3G51840.1 Orysa4|Os05g07090.1,Orysa4|Os01g06600.1  
Orysa4|Os06g23780.1,Orysa4|Os06g23870.1  
Orysa4|Os06g23760.1  
AT1G50440.1 Orysa4|Os02g03950.1  
AT2G22120.1 Orysa4|Os11g39130.1  
AT2G03590.1,AT2G03530.1 Orysa4|Os12g31850.1  
AT2G03520.1  
AT1G26440.3  
AT2G03600.1  
Orysa4|Os12g31890.1  
AT2G30100.1 Orysa4|Os05g28500.1  
Orysa4|Os10g31790.1  
AT3G10985.1 Orysa4|Os05g27580.1,Orysa4|Os03g18770.1  
AT5G01740.1 Orysa4|Os05g27590.1  
AT3G53740.3,AT2G37600.1,AT5G02450.1 Orysa4|Os01g62350.1,Orysa4|Os05g38520.1  
AT1G01110.1,AT4G00820.1 Orysa4|Os08g02250.1  
AT4G10640.1  
AT5G24330.1 Orysa4|Os02g03030.1  
AT5G09790.1 Orysa4|Os01g73460.1  
AT2G38650.1 Orysa4|Os07g48370.1,Orysa4|Os11g03160.1,Orysa4|Os12g02910.1,Orysa4|Os03g21250.1  
AT2G20810.1 Orysa4|Os04g54360.1  
AT4G38270.1 Orysa4|Os10g21890.1,Orysa4|Os06g51160.1  
AT3G61130.1 Orysa4|Os09g36190.1,Orysa4|Os09g36180.1  
AT5G47780.1 Orysa4|Os08g23780.1  
AT5G15470.1,AT3G01040.1 Orysa4|Os12g38930.1  
AT2G46480.1  
AT3G58790.1  
AT5G54690.1  
Orysa4|Os03g30000.1  
Orysa4|Os06g49810.1  
Orysa4|Os08g38740.1  
Orysa4|Os11g37980.1  
Orysa4|Os03g11330.1  
AT4G34420.1,AT2G15730.1,AT3G50620.1 Orysa4|Os03g27760.1  
Orysa4|Os03g24910.1  
AT5G12400.1,AT5G22760.1,AT5G35210.1  
Orysa4|Os07g46690.1,Orysa4|Os01g58880.1,Orysa4|Os11g05140.1,Orysa4|Os11g05130.1  
AT3G15610.1,AT1G52730.1 Orysa4|Os06g39760.1,Orysa4|Os02g11060.1  
AT1G15470.1  
AT4G29920.1,AT5G57130.1 Orysa4|Os04g23220.1  
AT3G52490.1 Orysa4|Os04g33980.1,Orysa4|Os02g33460.1  
Orysa4|Os02g26600.1  
Orysa4|Os11g05820.1  
AT1G09640.1,AT1G57720.1 Orysa4|Os06g37440.1,Orysa4|Os02g12800.1  
AT3G07720.1 Orysa4|Os09g07460.1  
AT3G16390.1,AT1G54040.2,AT5G48180.1,AT2G33070.1,AT3G16400.1  
AT3G16410.1  
AT1G29350.1,AT1G29370.1 Orysa4|Os01g47430.1,Orysa4|Os05g49180.1  
AT5G46380.1,AT4G18150.1  
AT2G45010.1 Orysa4|Os03g01210.1  
AT5G51400.1  
AT5G12150.1,AT5G19390.1 Orysa4|Os07g46450.1,Orysa4|Os03g24180.1  
AT4G24580.1  
AT3G56150.1 Orysa4|Os07g03230.1,Orysa4|Os02g03080.1  
AT3G22860.1  
AT4G04920.1 Orysa4|Os10g35560.1  
AT3G26080.1,AT3G26070.1 Orysa4|Os03g49720.1  
AT3G16350.1 Orysa4|Os01g09280.1  
AT3G13210.1,AT5G45990.1,AT5G41770.1 Orysa4|Os05g22260.1  
AT3G51110.1  
Orysa4|Os10g18150.1  
Orysa4|Os06g33250.1  
AT1G57800.1,AT5G39550.1,AT1G66050.1,AT1G57820.1,AT1G66040.1  
Orysa4|Os05g01230.1,Orysa4|Os04g22240.1  
AT4G08590.1  
AT3G54230.1 Orysa4|Os02g07070.1  
AT5G66730.1,AT3G50700.1 Orysa4|Os07g39310.1,Orysa4|Os03g10140.1  
AT1G68130.1,AT1G25250.1,AT2G01940.2 Orysa4|Os08g36390.1,Orysa4|Os09g27650.1  
AT2G02070.1 Orysa4|Os09g38340.1,Orysa4|Os02g45054.1,Orysa4|Os08g44050.1

AT1G55110.1,AT3G13810.1 Orysa4|Os01g09850.1  
 AT1G03840.1,AT5G44160.1 Orysa4|Os01g14010.1  
 AT1G14580.1,AT2G02080.1  
 AT5G60470.1  
 AT4G02670.1  
 AT3G45260.1,AT5G03150.1  
     Orysa4|Os01g70870.1  
     Orysa4|Os03g13400.1  
     Orysa4|Os04g47860.1  
     Orysa4|Os02g31890.1  
     Orysa4|Os01g39110.1  
 AT5G16270.1 Orysa4|Os01g67250.1  
 AT5G40840.2  
 AT5G19510.1,AT5G12110.1 Orysa4|Os07g46750.1  
 AT2G18110.1,AT1G30230.1 Orysa4|Os07g42300.1,Orysa4|Os03g29260.1  
 AT3G10770.1,AT3G56680.1,AT5G05100.1,AT2G40960.1 Orysa4|Os09g39462.1  
     Orysa4|Os05g34070.1  
 AT1G55350.1 Orysa4|Os02g47970.1  
 AT4G35880.1,AT2G17760.1 Orysa4|Os04g15790.1  
 AT5G10080.1 Orysa4|Os02g51540.1  
 AT3G51350.1,AT3G51360.1  
     Orysa4|Os06g50390.1  
 AT3G04520.1,AT1G08630.1 Orysa4|Os04g43650.1  
     Orysa4|Os06g04630.1  
 AT1G15060.1 Orysa4|Os01g49760.1  
 AT1G73750.1  
     Orysa4|Os08g27050.1  
 AT1G09430.1 Orysa4|Os11g47330.1,Orysa4|Os12g37870.1  
 AT1G10670.1,AT1G60810.1  
     Orysa4|Os11g47120.1  
 AT2G39140.1 Orysa4|Os03g05806.1  
 AT3G43340.1  
 AT3G44160.1 Orysa4|Os05g43470.1  
 AT5G19620.1 Orysa4|Os02g10260.1  
 AT3G48620.1  
 AT1G63440.1 Orysa4|Os02g10290.1  
 AT4G33520.3 Orysa4|Os08g37950.1  
 AT5G44790.1 Orysa4|Os02g07630.1  
 AT5G21930.1 Orysa4|Os03g08070.1  
 AT4G37270.1 Orysa4|Os06g47550.1  
     Orysa4|Os04g46940.1  
     Orysa4|Os03g27040.1  
     Orysa4|Os07g43040.1  
     Orysa4|Os06g45500.1  
 AT5G01380.1,AT2G38250.1 Orysa4|Os04g51320.1  
     Orysa4|Os02g47370.1  
 AT4G38480.1,AT4G35140.1 Orysa4|Os10g39760.1  
 AT3G45620.1 Orysa4|Os03g17780.1  
     Orysa4|Os06g50880.1  
 AT5G42950.1 Orysa4|Os07g04530.1  
 AT1G24490.1 Orysa4|Os03g62750.1  
 AT2G28800.1 Orysa4|Os01g05800.1  
 AT4G04955.1 Orysa4|Os04g58390.1  
 AT1G13130.1,AT5G17500.1,AT3G26140.1 Orysa4|Os02g38260.1,Orysa4|Os04g40510.1  
 AT5G16700.1,AT3G26130.1  
     Orysa4|Os04g40490.1  
 AT1G13050.1,AT3G26350.1,AT4G26490.1 Orysa4|Os01g68090.1,Orysa4|Os01g68080.1  
     Orysa4|Os08g38580.1  
 AT1G65295.1 Orysa4|Os01g68840.1  
     Orysa4|Os11g27540.1  
     Orysa4|Os11g02820.1  
 AT4G37220.1,AT3G50830.1 Orysa4|Os03g55850.1  
 AT2G23680.1  
 AT2G15970.1  
 AT5G43990.2,AT1G04050.1 Orysa4|Os02g40770.1  
 AT3G04380.1  
 AT3G54420.1 Orysa4|Os02g39330.1  
 AT3G12500.1 Orysa4|Os05g33130.1,Orysa4|Os05g33140.1,Orysa4|Os06g51050.1,Orysa4|Os06g51060.1  
 AT4G01700.1,AT1G02360.1 Orysa4|Os01g18400.1,Orysa4|Os05g04690.1  
 AT3G16920.1,AT1G05850.1 Orysa4|Os08g41100.1,Orysa4|Os09g32080.1  
 AT2G43600.1  
 AT2G43570.1  
     Orysa4|Os04g41680.1,Orysa4|Os04g41620.1  
     Orysa4|Os12g13610.1  
     Orysa4|Os10g39680.1,Orysa4|Os03g04060.1  
     Orysa4|Os05g33150.1  
     Orysa4|Os12g15490.1  
 AT3G09560.1,AT5G42870.1 Orysa4|Os11g40080.1  
     Orysa4|Os05g38710.1  
 AT1G36730.1 Orysa4|Os09g15770.1,Orysa4|Os06g48350.1  
 AT1G77840.1  
 AT2G24330.1 Orysa4|Os04g57690.1,Orysa4|Os02g41990.1

AT4G31090.1  
AT4G31080.1  
Orysa4|Os04g44180.1  
Orysa4|Os02g58380.1  
AT2G44350.2 Orysa4|Os11g33240.1,Orysa4|Os02g10070.1  
AT2G11270.1,AT3G60100.1  
AT5G63920.1,AT2G32000.1 Orysa4|Os03g06900.1  
Orysa4|Os09g32450.1  
AT1G28960.1,AT2G33980.1 Orysa4|Os08g28840.1,Orysa4|Os08g28860.1  
AT5G45940.1  
Orysa4|Os05g11870.1  
AT2G05840.1,AT5G35590.1 Orysa4|Os03g08280.1  
Orysa4|Os07g42260.1  
AT5G49900.1 Orysa4|Os11g13810.1  
AT1G33700.1,AT4G10060.1  
Orysa4|Os08g01940.1  
AT2G48050.1 Orysa4|Os01g29230.1  
AT2G48040.1  
AT4G21810.1,AT4G04860.1 Orysa4|Os03g63520.1  
AT3G10040.1 Orysa4|Os01g21590.1  
AT1G21200.1,AT1G76870.1 Orysa4|Os12g06640.1,Orysa4|Os11g06410.1  
Orysa4|Os02g33770.1  
AT1G04420.1 Orysa4|Os03g41510.1  
Orysa4|Os11g42540.1  
AT5G27540.1 Orysa4|Os03g59590.1  
AT3G63150.1  
AT3G05310.1  
Orysa4|Os03g59600.1  
AT4G16420.1 Orysa4|Os03g53960.1  
AT3G07740.1  
AT5G14320.1 Orysa4|Os03g49710.1  
AT1G77750.1  
AT1G73230.1,AT1G17880.1 Orysa4|Os03g01910.1  
Orysa4|Os03g63400.1  
AT3G09630.1,AT5G02870.1 Orysa4|Os07g08330.1  
AT5G61210.1,AT1G13890.1 Orysa4|Os02g24080.1  
Orysa4|Os02g32740.1  
Orysa4|Os03g11380.1  
AT2G40410.2,AT3G56170.1 Orysa4|Os01g07200.1  
Orysa4|Os12g15314.1,Orysa4|Os11g01830.1  
Orysa4|Os01g07212.1  
Orysa4|Os12g15190.1,Orysa4|Os12g01830.1  
AT2G19600.1,AT5G11800.1 Orysa4|Os06g36590.1  
AT5G51710.1  
AT1G62870.1,AT1G12380.1 Orysa4|Os02g25230.1,Orysa4|Os04g19140.1  
AT3G28007.1  
Orysa4|Os01g42090.1,Orysa4|Os02g19820.1,Orysa4|Os12g07860.1,Orysa4|Os01g42110.1,Orysa4|Os05  
g51090.1  
AT3G16690.1,AT4G15920.1 Orysa4|Os03g22200.1  
AT5G53190.1 Orysa4|Os05g12320.1,Orysa4|Os01g12130.1  
AT3G48740.1,AT5G50800.1,AT5G23660.1,AT4G25010.1 Orysa4|Os12g29220.1,Orysa4|Os11g31190.1  
AT1G21460.1 Orysa4|Os05g35140.1,Orysa4|Os01g65880.1  
AT5G40260.1  
AT1G66770.1,AT4G10850.1  
AT2G39060.1  
AT5G50790.1  
Orysa4|Os09g08030.1  
Orysa4|Os09g08490.1,Orysa4|Os09g08440.1  
Orysa4|Os09g08270.1  
Orysa4|Os01g21230.1  
AT2G39050.1 Orysa4|Os01g01450.1  
Orysa4|Os07g48490.1,Orysa4|Os03g21040.1,Orysa4|Os07g48460.1,Orysa4|Os07g48500.1  
Orysa4|Os03g20920.1  
AT5G37070.1,AT3G08890.1,AT5G01610.1 Orysa4|Os01g38500.1  
AT2G03350.1 Orysa4|Os03g11210.1  
Orysa4|Os03g18560.1  
AT3G12480.1 Orysa4|Os05g41450.1  
AT5G19490.1  
Orysa4|Os11g34200.1  
AT1G75850.1 Orysa4|Os03g58700.1  
AT2G17790.1  
AT3G51310.1  
AT2G37270.1,AT3G11940.1 Orysa4|Os11g29190.1,Orysa4|Os01g01060.1  
AT5G39740.1,AT3G25520.1 Orysa4|Os01g67134.1  
AT1G06750.1,AT1G04280.1 Orysa4|Os01g56764.1,Orysa4|Os05g43300.1,Orysa4|Os03g43010.1  
AT2G30630.2  
AT5G03760.1,AT5G22740.1 Orysa4|Os06g42020.1,Orysa4|Os02g09930.1  
AT2G24630.1,AT4G31590.1 Orysa4|Os09g25900.1  
AT4G07960.1 Orysa4|Os01g56130.1,Orysa4|Os07g03260.1,Orysa4|Os05g43530.1  
AT4G13410.1,AT2G35650.1,AT1G24070.1,AT5G16190.1,AT1G23480.1  
AT4G16590.1  
AT3G56000.1

AT3G07330.1  
Orysa4|Os09g26770.1,Orysa4|Os10g26630.1,Orysa4|Os03g07350.1  
Orysa4|Os09g39920.1  
Orysa4|Os02g51060.1  
Orysa4|Os03g26044.1,Orysa4|Os07g43710.1  
Orysa4|Os08g33740.1  
Orysa4|Os08g15420.1  
Orysa4|Os03g56060.1  
Orysa4|Os11g13650.1  
AT4G18593.1 Orysa4|Os12g03990.1,Orysa4|Os11g04180.1  
Orysa4|Os02g15270.1  
AT3G54500.1 Orysa4|Os01g31360.1  
AT2G20320.1 Orysa4|Os03g05200.1  
AT5G35560.1 Orysa4|Os02g53700.1  
AT1G29800.1 Orysa4|Os02g13890.1,Orysa4|Os06g35910.1  
AT3G43230.1 Orysa4|Os07g17130.1  
Orysa4|Os07g42500.1  
AT3G20870.1 Orysa4|Os02g10230.1  
Orysa4|Os08g01030.1  
AT3G11560.3,AT5G06220.1 Orysa4|Os08g37610.1  
AT1G52600.1 Orysa4|Os06g16260.1,Orysa4|Os05g23260.1  
AT3G15710.1  
AT1G04880.1 Orysa4|Os02g27060.1  
AT1G76110.1 Orysa4|Os09g37250.1  
AT1G55650.1,AT3G13350.1  
AT1G52900.1,AT1G61105.1 Orysa4|Os07g37950.1  
AT5G44910.1,AT4G19515.1,AT5G44900.1,AT4G19910.1,AT5G38344.1,AT2G32140.1,AT1G72950.1,AT1G09665.1,AT4G11340.1,AT1G57670.1,AT1G72900.1,AT1G51280.1,AT4G23515.1,AT2G03300.1,AT2G03030.1,AT5G44920.1,AT1G72940.1,AT5G45220.1,AT1G60320.1,AT1G17615.1,AT2G20145.1,AT1G72890.1,AT1G72910.1,AT1G72930.1,AT1G72920.1,AT1G57830.1  
AT2G17880.1,AT4G36040.1 Orysa4|Os08g43490.1  
AT1G80030.1 Orysa4|Os02g56040.1  
AT5G48030.1 Orysa4|Os06g02620.1  
AT4G09350.1 Orysa4|Os11g10990.1  
AT3G13310.1  
AT3G17830.1  
AT5G18140.1  
Orysa4|Os12g07060.1  
AT4G36910.1 Orysa4|Os08g22149.1  
AT4G34120.1  
Orysa4|Os09g02710.1  
AT4G01150.1 Orysa4|Os06g15400.1,Orysa4|Os02g49870.1  
AT4G38100.1 Orysa4|Os09g29080.1  
Orysa4|Os08g33380.1  
AT1G16080.1 Orysa4|Os08g16570.1  
AT5G65720.1 Orysa4|Os09g16910.1  
AT5G16250.1,AT5G36800.1,AT3G02640.1,AT5G36710.1 Orysa4|Os04g41900.1  
Orysa4|Os05g43140.1,Orysa4|Os01g67110.1  
AT2G26550.1 Orysa4|Os03g27770.1  
AT5G62600.1 Orysa4|Os10g33770.1  
AT1G22850.1 Orysa4|Os01g66170.1  
AT4G38040.1 Orysa4|Os02g09430.1  
AT5G03795.1 Orysa4|Os07g09050.1  
AT4G16745.1 Orysa4|Os01g01780.1  
AT5G25310.1  
AT3G07620.1  
AT5G19670.1,AT5G25820.1,AT4G32790.1  
AT5G37000.1,AT5G11610.1  
Orysa4|Os06g43160.1  
Orysa4|Os06g07887.1,Orysa4|Os06g07987.1  
Orysa4|Os01g45350.1  
AT5G17710.2 Orysa4|Os02g39870.1  
AT1G36390.1  
AT5G13430.1,AT5G13440.1 Orysa4|Os02g32120.1,Orysa4|Os04g32660.1  
AT1G11890.1 Orysa4|Os03g57760.1,Orysa4|Os06g09850.1  
AT5G52270.1  
Orysa4|Os08g21580.1,Orysa4|Os01g13350.1  
AT1G19680.1,AT1G75400.1 Orysa4|Os01g15630.1  
AT4G39140.1,AT2G21500.1  
AT1G19400.1,AT1G75180.1 Orysa4|Os03g56420.1  
AT1G01500.1  
Orysa4|Os03g12700.1  
AT1G73325.1,AT1G73260.1,AT1G17860.1 Orysa4|Os04g44470.1  
AT1G72290.1  
AT3G48830.1,AT5G23690.1 Orysa4|Os04g32490.1  
AT2G17580.1 Orysa4|Os03g03930.1  
AT1G28090.1  
AT2G31955.1 Orysa4|Os02g15870.1,Orysa4|Os12g32230.1  
AT5G27700.1,AT3G53890.1 Orysa4|Os03g22460.1  
AT4G29590.1 Orysa4|Os01g51530.1  
AT3G01660.1 Orysa4|Os04g40530.1  
AT2G33550.1 Orysa4|Os04g32590.1,Orysa4|Os02g31160.1

Orysa4|Os01g70230.1  
AT2G21790.1 Orysa4|Os06g07210.1  
AT1G49970.1 Orysa4|Os05g51450.1  
AT3G61670.1,AT2G46380.1 Orysa4|Os02g15820.1,Orysa4|Os06g33320.1  
AT1G01440.1,AT4G01090.1  
Orysa4|Os01g43330.1,Orysa4|Os05g50910.1  
AT5G66150.1 Orysa4|Os10g05069.1  
AT5G13980.1 Orysa4|Os11g32260.1  
AT3G26720.1  
AT1G07110.1 Orysa4|Os05g07130.1  
Orysa4|Os03g18310.1  
AT5G01170.1,AT3G09070.1,AT2G38070.1 Orysa4|Os05g37800.1,Orysa4|Os01g63310.1  
AT5G58930.1,AT3G46990.1  
AT4G38510.1 Orysa4|Os01g51380.1  
AT1G76030.1  
AT1G20260.2  
Orysa4|Os06g37180.1  
AT5G48060.1 Orysa4|Os06g41090.1  
AT1G74720.1 Orysa4|Os01g40480.1  
AT3G57880.1,AT1G51570.1 Orysa4|Os05g30750.1  
AT3G03680.1 Orysa4|Os03g44890.1  
AT1G04150.1 Orysa4|Os02g57090.1  
AT4G11610.1 Orysa4|Os04g58720.1  
AT1G22610.1 Orysa4|Os04g59520.1  
AT5G06850.1  
AT5G44760.1,AT4G20080.1,AT3G61720.1,AT5G03435.1,AT5G12970.1  
AT4G00700.1  
AT3G61300.1  
Orysa4|Os07g31940.1  
Orysa4|Os12g08670.1  
Orysa4|Os04g39680.1  
Orysa4|Os02g44490.1  
Orysa4|Os07g30020.1  
Orysa4|Os05g35480.1  
AT5G10860.1 Orysa4|Os03g52690.1  
Orysa4|Os01g44360.1  
AT5G02310.1 Orysa4|Os01g05500.1  
AT5G42760.1 Orysa4|Os03g56370.1  
AT5G23540.1 Orysa4|Os05g30800.1,Orysa4|Os01g16190.1  
Orysa4|Os07g03760.1  
Orysa4|Os06g49020.1  
Orysa4|Os06g35420.1  
AT2G38670.1 Orysa4|Os12g02820.1  
Orysa4|Os10g24810.1,Orysa4|Os08g12830.1  
Orysa4|Os11g03050.1  
AT4G25100.1,AT5G51100.1 Orysa4|Os06g02500.1  
AT5G20990.1 Orysa4|Os04g56620.1  
AT2G24390.1 Orysa4|Os06g48960.1,Orysa4|Os02g04800.1  
AT3G28940.1,AT4G31310.1,AT3G28950.1,AT3G28930.1,AT5G39720.1,AT5G39730.1  
AT3G24500.1 Orysa4|Os06g39240.1  
AT3G58680.1,AT2G42680.1 Orysa4|Os08g27850.1  
AT2G40730.1 Orysa4|Os01g60440.1  
AT1G72520.1,AT1G17420.1 Orysa4|Os03g08220.1  
AT3G45140.1 Orysa4|Os08g39840.1,Orysa4|Os08g39850.1,Orysa4|Os02g10120.1  
AT1G55020.1,AT3G22400.1  
Orysa4|Os03g49380.1,Orysa4|Os03g52860.1,Orysa4|Os03g49260.1,Orysa4|Os03g49350.1  
AT1G67560.1  
Orysa4|Os04g37430.1  
Orysa4|Os12g37260.1,Orysa4|Os12g37350.1  
Orysa4|Os12g37320.1  
Orysa4|Os05g23880.1  
Orysa4|Os02g19790.1  
Orysa4|Os11g36719.1  
Orysa4|Os06g04420.1  
AT3G19340.1 Orysa4|Os12g29550.1,Orysa4|Os11g32490.1  
AT5G13940.1  
Orysa4|Os01g70390.1  
AT3G21740.1 Orysa4|Os04g53612.1  
AT5G57930.2 Orysa4|Os02g50010.1  
AT5G61930.1 Orysa4|Os07g40920.1  
AT1G26220.1 Orysa4|Os08g01170.1  
AT1G32070.2 Orysa4|Os05g40260.1  
AT1G26760.1 Orysa4|Os03g07260.1  
Orysa4|Os08g33650.1  
AT2G03120.1 Orysa4|Os05g36070.1,Orysa4|Os02g02530.1  
AT4G38220.2 Orysa4|Os08g40110.1  
AT1G44180.1,AT1G44820.1 Orysa4|Os06g10770.1  
AT4G29390.1,AT2G19750.1,AT5G56670.1 Orysa4|Os06g07580.1  
AT1G29410.2,AT5G05590.1,AT1G07780.1 Orysa4|Os02g16630.1  
AT2G19730.1,AT4G29410.1 Orysa4|Os02g57540.1,Orysa4|Os01g51020.1,Orysa4|Os05g46430.1  
AT5G42190.1 Orysa4|Os11g26910.1  
AT2G20160.1,AT2G03170.1,AT3G60010.1,AT2G03190.1,AT3G25650.1,AT4G34210.1,AT1G75950.1,AT2G03160.1,A

T1G20140.1,AT1G10230.1,AT4G34470.1,AT2G25700.1  
AT3G53060.1,AT3G21860.1,AT3G60020.1,AT3G21850.1  
AT3G21830.1,AT3G21840.1  
Orysa4|Os02g13180.1,Orysa4|Os09g36830.1  
Orysa4|Os09g10270.1,Orysa4|Os07g05180.1,Orysa4|Os08g28820.1,Orysa4|Os07g05150.1  
Orysa4|Os08g28780.1  
Orysa4|Os07g22680.1  
Orysa4|Os07g43180.1  
AT4G24610.1 Orysa4|Os02g52280.1  
AT5G48310.1  
AT5G65440.1  
AT1G33270.1 Orysa4|Os11g34370.1  
AT1G31160.1 Orysa4|Os06g45660.1  
AT3G56490.1 Orysa4|Os03g20630.1  
Orysa4|Os01g59750.1  
AT3G57180.1 Orysa4|Os06g30380.1  
AT4G10620.1 Orysa4|Os09g19980.1  
Orysa4|Os05g03380.1  
AT5G40640.1,AT3G27390.1 Orysa4|Os02g38430.1,Orysa4|Os04g40700.1  
AT4G12680.1 Orysa4|Os06g19630.1  
AT1G75230.2,AT1G19480.1 Orysa4|Os05g50290.1  
AT3G50880.1  
AT4G25030.1,AT5G45410.1 Orysa4|Os10g43060.1,Orysa4|Os07g06550.1,Orysa4|Os06g02540.1  
AT1G30000.1 Orysa4|Os05g11850.1  
AT3G21160.1,AT1G51590.1 Orysa4|Os04g51690.1  
AT5G60750.1 Orysa4|Os06g30910.1  
AT5G64610.1,AT5G09740.1 Orysa4|Os07g43360.1  
AT4G14950.1,AT1G05360.1 Orysa4|Os01g57066.1  
Orysa4|Os07g38380.1  
AT1G74060.1,AT1G18540.1,AT1G74050.1 Orysa4|Os04g39700.1,Orysa4|Os02g37862.1  
AT1G04810.1,AT2G32730.1 Orysa4|Os08g12820.1  
Orysa4|Os04g51910.1  
AT1G52920.1,AT2G20770.1 Orysa4|Os10g35480.1  
AT1G15140.1 Orysa4|Os02g22260.1  
Orysa4|Os01g03050.1  
AT1G09940.1,AT1G58290.1 Orysa4|Os10g35840.1  
AT2G31250.1  
AT3G59540.1,AT2G43460.1 Orysa4|Os11g24610.1  
AT5G03415.1 Orysa4|Os10g30420.1,Orysa4|Os03g05760.1  
AT5G02470.1  
AT5G53150.1 Orysa4|Os04g31940.1,Orysa4|Os03g28310.1  
AT2G05230.1,AT5G37380.1,AT5G35753.1,AT5G18750.1,AT4G19570.1,AT2G05250.1,AT3G06340.1  
Orysa4|Os01g27740.1,Orysa4|Os06g34440.1,Orysa4|Os11g36530.1  
AT2G35540.1 Orysa4|Os06g02170.1  
AT5G62780.1,AT5G37440.1,AT4G19590.1,AT5G37750.1,AT4G19580.1  
AT5G37760.1  
AT5G50115.1  
AT1G09260.1,AT2G25560.1  
AT4G27980.1  
AT3G04980.1,AT5G27240.1  
Orysa4|Os01g69930.1  
Orysa4|Os03g36160.1,Orysa4|Os03g62140.1,Orysa4|Os03g62130.1,Orysa4|Os10g03610.1,Orysa4|Os03  
g62150.1  
Orysa4|Os03g61550.1  
Orysa4|Os01g70250.1  
AT1G16500.1,AT1G79160.1 Orysa4|Os04g52700.1  
Orysa4|Os03g45870.1  
AT3G11600.1,AT5G06270.1 Orysa4|Os04g33860.1,Orysa4|Os02g33330.1  
AT5G22270.1  
Orysa4|Os05g37030.1  
Orysa4|Os04g58790.1  
Orysa4|Os12g06130.1  
AT5G16460.1 Orysa4|Os12g05330.1  
AT1G29760.1,AT2G34380.1 Orysa4|Os09g36360.1  
AT3G50340.1,AT5G67020.1 Orysa4|Os08g36820.1,Orysa4|Os09g28340.1  
AT2G22790.1  
Orysa4|Os03g27850.1  
AT4G06599.1 Orysa4|Os01g65450.1  
AT2G31810.2 Orysa4|Os02g39570.1,Orysa4|Os11g14950.1  
AT5G16290.1  
AT5G05710.1 Orysa4|Os01g63800.1  
AT2G29700.1  
AT2G33670.1,AT5G65970.1,AT2G17480.1,AT2G17430.1 Orysa4|Os10g39520.1  
AT2G39200.1,AT1G61560.1,AT1G11310.1 Orysa4|Os06g29110.1,Orysa4|Os03g03700.1  
AT1G42560.1  
AT3G45290.1  
Orysa4|Os05g09050.1  
AT5G08050.1 Orysa4|Os11g27300.1,Orysa4|Os12g38640.1  
AT1G74730.1 Orysa4|Os01g40310.1  
AT5G28050.2 Orysa4|Os03g61810.1,Orysa4|Os07g14150.1  
AT3G05300.1  
AT4G26850.1,AT5G55120.1 Orysa4|Os12g08810.1

Orysa4|Os12g41800.1  
 Orysa4|Os01g67520.1  
 AT1G67070.1,AT3G02570.1 Orysa4|Os01g03710.1,Orysa4|Os11g38810.1,Orysa4|Os09g22090.1  
 Orysa4|Os02g45230.1  
 AT3G20000.1 Orysa4|Os03g20750.1,Orysa4|Os01g16910.1  
 AT1G50400.1  
 AT5G61820.1 Orysa4|Os08g42590.1  
 AT2G13360.1 Orysa4|Os08g39300.1  
 AT4G16130.1 Orysa4|Os06g48940.1,Orysa4|Os02g04840.1  
 AT3G42850.1  
 AT3G55410.1,AT5G65750.1 Orysa4|Os07g49520.1  
 Orysa4|Os04g32020.1  
 AT4G34350.1 Orysa4|Os03g52170.1  
 Orysa4|Os03g52180.1  
 Orysa4|Os03g52210.1  
 AT1G30870.1 Orysa4|Os07g31610.1  
 AT4G33420.1 Orysa4|Os08g02110.1  
 AT4G37520.1,AT3G49960.1,AT5G67400.1,AT4G37530.1 Orysa4|Os03g55420.1,Orysa4|Os07g02440.1  
 AT1G44970.1 Orysa4|Os01g15810.1  
 AT5G19890.1 Orysa4|Os03g13210.1,Orysa4|Os10g02070.1  
 AT1G71695.1 Orysa4|Os01g73220.1,Orysa4|Os01g73200.1,Orysa4|Os01g73170.1  
 AT4G25980.1,AT1G77100.1 Orysa4|Os11g10460.1,Orysa4|Os12g08920.1  
 AT2G41480.1 Orysa4|Os01g07770.1  
 AT4G26010.1,AT1G34510.1,AT3G03670.1,AT5G17820.1 Orysa4|Os03g05770.1  
 AT3G17070.1 Orysa4|Os05g14260.1  
 AT5G47000.1,AT1G24110.1,AT3G28200.1,AT4G17690.1,AT5G40150.1 Orysa4|Os02g50770.1  
 AT2G22420.1 Orysa4|Os09g29490.1  
 AT2G37130.1 Orysa4|Os07g49360.1  
 AT2G39040.1 Orysa4|Os12g34524.1  
 AT2G24800.1,AT4G31760.1 Orysa4|Os04g42100.1  
 AT4G16270.1 Orysa4|Os08g20730.1  
 AT5G05340.1 Orysa4|Os12g02080.1,Orysa4|Os11g02130.1  
 AT5G66390.1 Orysa4|Os01g36240.1  
 AT5G42180.1 Orysa4|Os02g58720.1  
 AT4G30170.1,AT2G18980.1  
 AT5G64100.1,AT5G64120.1,AT5G64110.1,AT5G39580.1  
 AT3G42570.1  
 AT4G21960.1  
 AT5G58400.1,AT5G58390.1  
 AT3G50990.1  
 AT5G51890.1  
 Orysa4|Os07g06380.1,Orysa4|Os01g18970.1,Orysa4|Os07g06286.1,Orysa4|Os03g25360.1,Orysa4|Os05g04380.1,Orysa4|Os05g04440.1  
 Orysa4|Os09g32964.1  
 Orysa4|Os03g55410.1  
 Orysa4|Os04g59150.1,Orysa4|Os04g59160.1  
 Orysa4|Os04g59210.1,Orysa4|Os04g59260.1,Orysa4|Os04g59200.1  
 Orysa4|Os01g18890.1  
 Orysa4|Os01g73190.1  
 Orysa4|Os01g18900.1  
 Orysa4|Os07g44600.1  
 Orysa4|Os09g15510.1,Orysa4|Os09g15500.1,Orysa4|Os10g41720.1  
 Orysa4|Os04g01550.1  
 Orysa4|Os01g16450.1  
 Orysa4|Os07g48030.1,Orysa4|Os07g48050.1,Orysa4|Os07g47990.1,Orysa4|Os07g48010.1,Orysa4|Os07g48020.1  
 Orysa4|Os06g35480.1,Orysa4|Os02g14440.1,Orysa4|Os02g14460.1,Orysa4|Os02g14160.1,Orysa4|Os03g22010.1,Orysa4|Os02g14170.1,Orysa4|Os02g14430.1,Orysa4|Os06g35490.1,Orysa4|Os01g10850.1,Orysa4|Os06g35520.1,Orysa4|Os02g14180.1  
 Orysa4|Os03g22020.1,Orysa4|Os07g48060.1  
 Orysa4|Os04g55740.1,Orysa4|Os12g02060.1  
 Orysa4|Os03g32060.1  
 Orysa4|Os05g04410.1,Orysa4|Os04g04750.1,Orysa4|Os05g04450.1  
 Orysa4|Os11g02100.1  
 Orysa4|Os03g32050.1  
 Orysa4|Os01g15830.1  
 Orysa4|Os04g34630.1  
 Orysa4|Os09g13730.1  
 AT1G35750.1,AT2G29200.1,AT3G20250.1,AT1G35730.1,AT4G08560.1,AT1G22240.1,AT5G56510.1,AT3G10360.1,AT1G78160.1,AT2G29190.1,AT5G43110.1,AT4G08840.1,AT4G25880.1,AT5G43090.1 Orysa4|Os08g40830.1  
 Orysa4|Os02g57390.1,Orysa4|Os01g62650.1  
 Orysa4|Os12g31000.1,Orysa4|Os03g09150.1  
 Orysa4|Os03g09300.1,Orysa4|Os09g32210.1  
 Orysa4|Os04g20800.1,Orysa4|Os09g08730.1  
 Orysa4|Os05g01910.1,Orysa4|Os01g74030.1  
 Orysa4|Os12g38590.1,Orysa4|Os12g30520.1,Orysa4|Os11g37090.1,Orysa4|Os09g20560.1,Orysa4|Os04g12480.1  
 Orysa4|Os04g20774.1  
 AT5G24760.1 Orysa4|Os02g42520.1  
 AT5G42250.1 Orysa4|Os07g42924.1,Orysa4|Os03g09020.1,Orysa4|Os03g08999.1  
 AT1G77120.1 Orysa4|Os11g10480.1,Orysa4|Os11g10510.1,Orysa4|Os11g10520.1  
 AT5G63620.1 Orysa4|Os08g01760.1

AT1G64710.1,AT1G32780.1 Orysa4|Os10g07229.1  
AT5G43940.1 Orysa4|Os02g57040.1  
AT1G22430.1,AT4G22110.1,AT1G22440.1  
AT4G22890.1,AT4G11960.1 Orysa4|Os08g41460.1,Orysa4|Os03g64020.1  
Orysa4|Os08g21900.1  
Orysa4|Os08g21880.1  
AT3G23280.1 Orysa4|Os07g26490.1  
AT4G14365.1  
AT5G23150.1,AT5G08230.1 Orysa4|Os08g01054.1  
AT3G63070.1,AT2G48160.1 Orysa4|Os03g24339.1,Orysa4|Os07g46180.1  
AT3G11400.1 Orysa4|Os02g54700.1  
AT5G06000.1  
Orysa4|Os02g54690.1  
AT1G17370.1,AT1G54080.2,AT3G14100.1 Orysa4|Os11g40510.1  
Orysa4|Os08g40880.1  
Orysa4|Os07g42380.1  
AT1G15480.1,AT1G80270.1 Orysa4|Os12g07260.1,Orysa4|Os01g17320.1  
AT1G07590.1 Orysa4|Os08g06500.1  
AT3G15590.1  
Orysa4|Os07g12140.1  
AT4G24480.1 Orysa4|Os04g52140.1  
AT5G03730.1 Orysa4|Os02g32610.1,Orysa4|Os09g39320.1  
AT5G07320.1,AT5G51050.1 Orysa4|Os02g10740.1,Orysa4|Os06g40200.1  
AT5G61810.1  
AT3G61050.1 Orysa4|Os07g22640.1  
AT3G61030.1,AT3G60950.1  
Orysa4|Os03g14700.1  
AT2G40590.1,AT3G56340.1,AT2G40510.1 Orysa4|Os01g60790.1,Orysa4|Os05g39960.1  
AT3G11850.1,AT3G54740.1,AT5G06560.1 Orysa4|Os03g44800.1  
Orysa4|Os07g06810.1,Orysa4|Os12g30500.1,Orysa4|Os03g57530.1  
Orysa4|Os11g36740.1  
AT2G35710.1,AT4G16600.1 Orysa4|Os10g40640.1,Orysa4|Os04g46750.1  
AT5G13140.1 Orysa4|Os09g32988.1,Orysa4|Os12g28770.1  
AT5G41050.1,AT3G26960.1  
AT2G29210.1 Orysa4|Os03g16369.1  
Orysa4|Os05g26870.1  
AT3G47890.1,AT3G47910.1 Orysa4|Os03g06950.1  
AT3G47900.1  
AT3G49180.1 Orysa4|Os07g22534.1  
Orysa4|Os09g30090.1  
AT1G18080.1,AT3G18130.1,AT1G48630.1 Orysa4|Os05g47890.1,Orysa4|Os01g49290.1  
AT5G58230.1 Orysa4|Os03g43890.1  
AT4G35050.1,AT2G16780.1  
Orysa4|Os09g36900.1  
AT1G19715.1 Orysa4|Os05g43240.1  
AT1G73040.1  
Orysa4|Os04g26320.1  
AT3G04090.1,AT5G18290.1 Orysa4|Os01g08660.1  
AT1G31190.1 Orysa4|Os02g07350.1  
AT5G19760.1 Orysa4|Os11g24450.1,Orysa4|Os05g11780.1  
AT5G09470.1,AT5G58970.1,AT3G54110.1,AT4G03115.1,AT1G14140.1,AT2G22500.1  
Orysa4|Os01g74640.1,Orysa4|Os08g37370.1,Orysa4|Os11g48040.1  
AT5G01340.1 Orysa4|Os03g18160.1  
AT4G24570.1  
Orysa4|Os12g34870.1,Orysa4|Os09g29050.1  
AT3G02870.1 Orysa4|Os03g39000.1  
AT1G60060.1 Orysa4|Os02g50900.1,Orysa4|Os06g12740.1  
AT4G29160.1 Orysa4|Os09g09480.1  
AT2G19830.1  
Orysa4|Os06g40620.1  
Orysa4|Os12g02830.1,Orysa4|Os11g03060.1  
AT3G27080.1,AT1G27390.1 Orysa4|Os01g69250.1  
AT3G27070.1,AT5G40930.1  
AT1G47290.2,AT2G26260.1 Orysa4|Os03g29170.1  
AT2G43420.1  
Orysa4|Os09g34090.1  
Orysa4|Os03g29150.1  
AT4G19390.1 Orysa4|Os06g49640.1  
AT5G13720.1 Orysa4|Os07g46330.1  
Orysa4|Os01g09810.1,Orysa4|Os03g52910.1  
AT3G59770.1 Orysa4|Os01g25330.1  
AT4G24920.1,AT5G50460.1 Orysa4|Os02g08180.1  
AT3G48570.1  
AT4G22970.1 Orysa4|Os02g53120.1  
ATCG00740.1  
Orysa4|Os05g22710.1,Orysa4|Os06g39700.1,Orysa4|Os04g16790.1,Orysa4|Os10g21330.1,Orysa4|Os08  
g15250.1,Orysa4|Os01g57944.1  
Orysa4|Os09g07910.1  
AT4G22220.1,AT4G04080.1,AT3G01020.1 Orysa4|Os05g49300.1,Orysa4|Os01g47340.1  
AT5G08560.1 Orysa4|Os02g19210.1  
AT5G43920.1  
AT4G26210.1,AT2G19680.1,AT4G29480.1 Orysa4|Os01g41610.1,Orysa4|Os05g45740.1



Orysa4|Os01g52200.1  
AT3G54540.1 Orysa4|Os03g32630.1  
AT1G64550.1 Orysa4|Os02g58020.1  
AT5G60790.1 Orysa4|Os08g45010.1,Orysa4|Os09g39910.1  
AT5G09930.1,AT5G64840.1 Orysa4|Os11g39020.1  
Orysa4|Os04g56330.1  
AT3G24800.1 Orysa4|Os02g40810.1  
Orysa4|Os09g33740.1  
AT2G46290.1,AT2G46280.1 Orysa4|Os08g21660.1,Orysa4|Os05g16660.1  
Orysa4|Os11g39300.1  
AT2G05990.1 Orysa4|Os09g10600.1,Orysa4|Os08g23810.1  
AT4G21670.1 Orysa4|Os02g42600.1,Orysa4|Os04g44710.1  
AT5G01270.1  
AT1G61850.1 Orysa4|Os07g33670.1  
AT5G57150.1,AT4G29930.1 Orysa4|Os04g23550.1  
Orysa4|Os04g23440.1  
AT1G27950.1 Orysa4|Os08g42040.1  
AT3G43720.1 Orysa4|Os03g20760.1,Orysa4|Os05g41030.1,Orysa4|Os01g59870.1,Orysa4|Os07g07790.1  
AT2G48140.1,AT1G05450.2,AT3G22620.1 Orysa4|Os03g57980.1,Orysa4|Os07g07920.1  
AT2G27130.1  
AT4G08670.1  
AT3G17920.1,AT1G48540.1 Orysa4|Os03g12160.1  
AT4G39910.1,AT2G22310.1 Orysa4|Os04g37950.1  
Orysa4|Os03g09080.1  
Orysa4|Os02g36400.1  
AT1G20580.1 Orysa4|Os03g13760.1,Orysa4|Os02g01250.1  
AT1G76300.1  
AT2G20580.1,AT4G28470.1 Orysa4|Os09g15750.1,Orysa4|Os02g05340.1,Orysa4|Os06g48640.1  
AT4G08140.1  
AT3G07670.1 Orysa4|Os02g49326.1  
AT3G03310.1 Orysa4|Os09g33820.1  
AT2G24270.1 Orysa4|Os08g34210.1  
AT1G69780.1,AT1G26960.1 Orysa4|Os03g07450.1  
AT4G36740.1,AT2G18550.1,AT5G66700.1 Orysa4|Os07g39320.1  
AT3G01470.1 Orysa4|Os08g32080.1,Orysa4|Os02g49700.1  
AT2G46680.1,AT3G61890.1  
Orysa4|Os09g35910.1,Orysa4|Os08g37580.1,Orysa4|Os02g43330.1,Orysa4|Os04g45810.1  
AT5G65310.1,AT2G22430.1,AT4G40060.1 Orysa4|Os09g29460.1,Orysa4|Os10g23090.1  
AT5G15150.1,AT3G01220.1  
AT1G27050.1  
AT5G03790.1  
AT2G36610.1  
Orysa4|Os09g21180.1  
AT1G53850.1,AT3G14290.1 Orysa4|Os11g40140.1  
AT1G76090.1,AT1G20330.1 Orysa4|Os03g04340.1  
AT5G13710.1 Orysa4|Os07g10600.1  
Orysa4|Os03g59290.1  
Orysa4|Os11g19140.1  
AT5G20040.1 Orysa4|Os06g51350.1  
AT1G29630.1 Orysa4|Os01g56940.1  
AT1G18090.1  
AT2G02550.1  
AT3G54380.1 Orysa4|Os03g22870.1  
AT3G06290.1 Orysa4|Os07g45160.1  
AT1G60170.1 Orysa4|Os04g46890.1,Orysa4|Os07g04850.1  
AT1G70400.2  
Orysa4|Os02g49730.1  
AT1G52870.2 Orysa4|Os03g38730.1  
AT4G03410.2  
AT3G27850.1,AT3G27840.1,AT3G27830.1 Orysa4|Os01g47330.1,Orysa4|Os05g49320.1  
AT2G32560.1,AT2G26850.1 Orysa4|Os01g17390.1  
AT2G41170.1  
Orysa4|Os01g59180.1  
AT3G46100.1 Orysa4|Os02g51830.1  
AT5G03406.1  
AT5G61790.1,AT5G07340.1 Orysa4|Os04g32950.1  
AT3G61380.1,AT4G00440.1,AT2G45900.1 Orysa4|Os04g47180.1  
AT5G02390.1 Orysa4|Os12g38260.1  
Orysa4|Os01g05660.1  
AT4G17190.1,AT5G47770.1 Orysa4|Os01g50760.1  
Orysa4|Os01g50050.1  
Orysa4|Os04g56210.1,Orysa4|Os04g56230.1  
AT5G28640.1 Orysa4|Os03g52320.1  
AT2G40030.1 Orysa4|Os02g05880.1  
AT1G63020.1  
Orysa4|Os01g73430.1  
AT1G09330.1 Orysa4|Os01g22870.1,Orysa4|Os05g06700.1  
AT1G22100.1,AT5G42810.1,AT1G58643.1,AT1G58936.1,AT1G59312.1 Orysa4|Os04g56580.1  
AT3G53980.1,AT5G05960.1 Orysa4|Os05g06780.1,Orysa4|Os01g62980.1  
AT2G37870.1  
Orysa4|Os04g33930.1,Orysa4|Os04g33920.1  
AT1G32090.1 Orysa4|Os10g42820.1

AT3G54510.1 Orysa4|Os01g72210.1  
AT1G30360.1 Orysa4|Os07g05570.1  
AT1G58520.1,AT1G10090.1 Orysa4|Os03g51620.1,Orysa4|Os12g43720.1  
AT3G01100.1 Orysa4|Os12g39320.1  
AT4G04340.1,AT4G22120.1,AT1G62320.1 Orysa4|Os05g51630.1,Orysa4|Os01g35050.1  
AT4G02900.1 Orysa4|Os05g32720.1  
AT1G69450.1  
AT4G15430.1,AT3G21620.1  
AT1G11960.1  
Orysa4|Os03g47070.1  
AT1G01820.1,AT3G61070.1,AT2G45740.1 Orysa4|Os06g03660.1  
Orysa4|Os03g02590.1  
AT1G10700.1 Orysa4|Os01g52530.1  
AT2G42910.1 Orysa4|Os02g48390.1  
AT1G17620.1 Orysa4|Os01g39290.1,Orysa4|Os05g11010.1,Orysa4|Os01g09880.1  
AT5G11890.1  
AT4G11560.1 Orysa4|Os01g34330.1  
AT3G43990.1,AT2G25120.1,AT4G23120.1  
AT3G58750.1,AT2G42790.1 Orysa4|Os02g13840.1  
AT3G58740.1  
AT5G11260.1 Orysa4|Os02g10860.1  
Orysa4|Os01g07880.1  
Orysa4|Os06g39960.1  
AT3G29240.1 Orysa4|Os10g18370.1  
AT1G33780.1 Orysa4|Os05g34720.1,Orysa4|Os01g66280.1  
AT1G06770.1,AT2G30580.1 Orysa4|Os12g40790.1,Orysa4|Os03g43360.1  
AT3G23060.1  
Orysa4|Os03g58390.1  
AT5G04930.1 Orysa4|Os01g17010.1  
AT1G26130.1,AT1G68710.1,AT1G13210.1,AT3G25610.1 Orysa4|Os06g29380.1  
AT5G44240.1 Orysa4|Os11g25980.1  
AT3G13900.1  
AT3G27870.1  
AT3G18700.1  
Orysa4|Os03g20949.1  
Orysa4|Os08g30380.1,Orysa4|Os03g20970.1,Orysa4|Os03g20958.1  
Orysa4|Os03g21680.1  
Orysa4|Os05g01030.1  
Orysa4|Os05g26990.1,Orysa4|Os09g03310.1  
AT2G47640.1,AT3G62840.1 Orysa4|Os05g24970.1  
Orysa4|Os01g73604.1  
AT5G19740.1 Orysa4|Os01g54010.1,Orysa4|Os01g53810.1  
AT4G07670.1  
AT3G54720.1  
Orysa4|Os01g53800.1  
AT1G79210.1,AT1G16470.1 Orysa4|Os03g26970.1,Orysa4|Os02g42320.1  
AT5G05660.1 Orysa4|Os01g06550.1  
AT1G10170.1 Orysa4|Os06g14190.1  
AT4G14290.1,AT3G23540.1 Orysa4|Os03g24450.1  
AT4G17150.1 Orysa4|Os06g40730.1,Orysa4|Os02g10440.1  
AT1G32470.1,AT2G35370.1 Orysa4|Os10g37180.1  
AT2G35120.1 Orysa4|Os02g07410.1  
AT3G08550.1,AT3G57200.1 Orysa4|Os01g13200.1  
AT2G41450.1  
AT2G27680.1 Orysa4|Os09g39390.1  
AT1G45050.1,AT5G42990.1 Orysa4|Os03g47770.1,Orysa4|Os12g44000.1  
AT1G75440.1  
AT4G36410.1  
ATCG00670.1 Orysa4|Os12g10590.1  
AT1G66670.1 Orysa4|Os01g32350.1  
AT5G45390.1 Orysa4|Os10g43050.1  
AT4G17040.1 Orysa4|Os01g16530.1  
AT1G02560.1 Orysa4|Os03g19510.1  
AT1G11750.1 Orysa4|Os03g29810.1  
AT1G12410.1 Orysa4|Os06g04530.1  
Orysa4|Os08g15270.1,Orysa4|Os06g39720.1  
AT4G10790.1 Orysa4|Os10g37630.1  
Orysa4|Os06g36760.1  
AT1G10585.1 Orysa4|Os01g01840.1,Orysa4|Os01g01870.1  
AT4G20970.1  
AT2G42390.1 Orysa4|Os01g54880.1  
AT5G56360.1 Orysa4|Os01g16970.1  
AT2G43180.1 Orysa4|Os04g42580.1,Orysa4|Os04g31700.1  
AT5G57850.1 Orysa4|Os02g17330.1  
Orysa4|Os05g15530.1  
AT4G00840.1 Orysa4|Os07g28460.1  
AT3G60800.1 Orysa4|Os03g58960.1  
AT4G22750.1  
AT4G37110.1 Orysa4|Os11g36030.1  
AT2G23530.1  
Orysa4|Os03g50420.1  
AT1G80070.1 Orysa4|Os05g07050.1

AT4G38780.1  
AT5G64270.1 Orysa4|Os02g05310.1  
Orysa4|Os02g27790.1  
Orysa4|Os02g04950.1  
Orysa4|Os02g05410.1  
AT1G05140.1,AT2G32480.1 Orysa4|Os03g38230.1  
Orysa4|Os07g48440.1,Orysa4|Os02g17220.1  
AT4G22840.1,AT4G12030.2 Orysa4|Os09g34900.1  
AT3G25410.1 Orysa4|Os02g27490.1  
AT2G41050.1 Orysa4|Os01g16170.1  
AT4G20100.1,AT4G36850.1  
AT1G16180.1 Orysa4|Os02g54990.1  
AT3G06170.1 Orysa4|Os03g34300.1  
AT3G08850.1,AT5G01770.1 Orysa4|Os12g01922.1  
AT3G11250.1,AT2G40010.1,AT3G09200.1 Orysa4|Os12g03880.1,Orysa4|Os11g04070.1,Orysa4|Os08g03640.1  
AT3G25040.1 Orysa4|Os04g30800.1,Orysa4|Os11g28340.1  
AT4G31480.1,AT4G31490.1 Orysa4|Os01g17430.1,Orysa4|Os11g07280.1  
AT3G58170.1 Orysa4|Os02g57510.1,Orysa4|Os08g44930.1  
AT4G14455.1  
AT3G05675.1 Orysa4|Os07g47260.1  
Orysa4|Os06g03840.1  
AT2G30200.1 Orysa4|Os03g18590.1  
AT3G55470.1 Orysa4|Os01g62430.1  
AT1G63220.1 Orysa4|Os02g42710.1,Orysa4|Os04g44870.1  
Orysa4|Os02g44560.1  
AT4G12480.1,AT4G12520.1,AT1G12090.1,AT4G12470.1,AT4G12510.1,AT1G62510.1  
Orysa4|Os04g46810.1,Orysa4|Os02g44310.1,Orysa4|Os04g46820.1  
AT4G22490.1  
AT4G22610.1,AT4G22520.1  
AT5G46890.1,AT2G45180.1,AT5G46900.1  
AT4G22460.1  
Orysa4|Os03g58670.1,Orysa4|Os10g40520.1,Orysa4|Os10g40530.1,Orysa4|Os10g40510.1  
Orysa4|Os10g40480.1,Orysa4|Os03g01310.1,Orysa4|Os10g20840.1,Orysa4|Os10g20830.1,Orysa4|Os10g20840.1,Orysa4|Os10g40430.1,Orysa4|Os10g40470.1,Orysa4|Os03g01300.1,Orysa4|Os10g20880.1  
Orysa4|Os10g09920.1  
Orysa4|Os10g40614.1  
Orysa4|Os02g44320.1,Orysa4|Os04g46830.1  
Orysa4|Os04g52260.1  
Orysa4|Os06g01580.1  
Orysa4|Os10g20860.1  
AT2G46150.1 Orysa4|Os05g45070.1,Orysa4|Os01g53470.1  
AT4G23610.1  
Orysa4|Os02g16610.1  
AT1G66860.1,AT5G38200.1 Orysa4|Os01g04620.1  
AT1G15040.1  
AT3G02900.1,AT5G16660.1 Orysa4|Os12g39370.1  
AT1G42960.1  
AT3G07660.1 Orysa4|Os09g08680.1  
AT3G13222.1,AT1G55820.1  
Orysa4|Os09g08670.1  
AT1G79610.1,AT1G54370.1 Orysa4|Os09g11450.1  
Orysa4|Os09g30446.1  
AT5G16110.1,AT1G13390.1,AT3G02555.1,AT1G68490.1 Orysa4|Os05g01210.1  
Orysa4|Os12g40840.1  
AT5G26600.1 Orysa4|Os01g18640.1,Orysa4|Os01g18660.1  
AT3G62130.1  
AT1G07010.1 Orysa4|Os10g25430.1  
AT5G16370.1,AT5G16340.1,AT1G75960.1 Orysa4|Os04g57850.1  
AT1G65890.1,AT1G65880.1,AT1G68270.1,AT1G66120.1 Orysa4|Os09g38350.1,Orysa4|Os03g03790.1  
AT2G17650.1,AT1G20560.1 Orysa4|Os03g04120.1,Orysa4|Os03g04130.1,Orysa4|Os02g02700.1  
AT1G21540.1,AT1G77240.1,AT1G21530.1  
AT1G76290.1  
Orysa4|Os01g24030.1  
AT1G28490.2 Orysa4|Os01g73230.1,Orysa4|Os11g06740.1  
AT1G79040.1 Orysa4|Os07g05360.1  
Orysa4|Os08g10020.1  
AT1G42470.1 Orysa4|Os04g47590.1  
AT4G38350.1  
AT3G18680.2 Orysa4|Os01g73450.1  
AT1G71940.1,AT4G09580.1 Orysa4|Os03g49700.1  
AT4G17790.1 Orysa4|Os02g46660.1,Orysa4|Os04g50216.1  
AT3G56960.1,AT3G07960.1,AT2G41210.1 Orysa4|Os03g24160.1,Orysa4|Os07g46490.1  
AT1G21980.1,AT1G77740.1 Orysa4|Os03g49800.1  
AT3G09920.1 Orysa4|Os02g57660.1  
AT2G26420.1,AT1G10900.1,AT1G60890.1,AT1G01460.1,AT4G01190.1 Orysa4|Os03g49510.1  
Orysa4|Os12g04700.1,Orysa4|Os03g24170.1,Orysa4|Os11g04900.1,Orysa4|Os11g04840.1  
Orysa4|Os03g15550.1  
AT4G22850.1,AT1G12450.1,AT4G12000.1 Orysa4|Os07g28440.1  
AT2G02370.1 Orysa4|Os03g25750.1  
Orysa4|Os07g44020.1  
AT1G08370.1 Orysa4|Os12g06020.1,Orysa4|Os11g05650.1  
Orysa4|Os03g62080.1

AT5G05920.1 Orysa4|Os03g52970.1  
Orysa4|Os09g25370.1  
AT5G62050.1,AT2G46470.1 Orysa4|Os10g37690.1,Orysa4|Os03g02480.1  
AT2G46455.1  
AT2G23790.1,AT5G66650.1,AT4G36820.1 Orysa4|Os03g13050.1,Orysa4|Os10g35770.1  
AT5G42610.1  
Orysa4|Os06g09260.1  
AT1G57610.1,AT1G09575.1 Orysa4|Os12g02880.1,Orysa4|Os01g60110.1,Orysa4|Os11g03130.1  
AT5G56610.1 Orysa4|Os05g44910.1,Orysa4|Os01g53710.1,Orysa4|Os06g05870.1  
AT2G35680.1 Orysa4|Os10g41240.1  
AT1G14310.1 Orysa4|Os08g07300.1  
AT2G41250.1 Orysa4|Os07g46520.1  
Orysa4|Os03g24070.1  
AT1G78770.1 Orysa4|Os03g13370.1  
AT2G26070.1 Orysa4|Os05g46240.1,Orysa4|Os01g51430.1  
AT3G51040.1 Orysa4|Os03g58520.1  
AT2G44810.1,AT4G16820.1 Orysa4|Os11g04940.1  
AT2G31690.1,AT1G05800.1 Orysa4|Os11g19340.1,Orysa4|Os11g19290.1,Orysa4|Os01g67430.1  
AT2G30550.2,AT1G06800.1,AT1G51440.1 Orysa4|Os05g32380.1  
AT4G18550.1 Orysa4|Os05g49840.1,Orysa4|Os01g46250.1  
AT1G30370.1  
AT1G06250.1  
AT2G31100.1  
Orysa4|Os02g43700.1,Orysa4|Os10g41270.1  
Orysa4|Os06g12700.1  
Orysa4|Os01g67450.1,Orysa4|Os02g42170.1  
Orysa4|Os11g27980.1  
Orysa4|Os05g49830.1,Orysa4|Os01g46290.1  
Orysa4|Os01g73740.1,Orysa4|Os01g46240.1  
AT3G26060.1 Orysa4|Os06g09610.1  
AT1G17730.1,AT1G73030.1 Orysa4|Os06g43590.1  
AT4G09670.1,AT1G34200.1,AT1G66130.1 Orysa4|Os10g26400.1  
Orysa4|Os10g26390.1  
AT2G03720.1,AT1G69080.1 Orysa4|Os12g31710.1  
AT3G03290.1,AT5G17390.1  
Orysa4|Os03g40130.1  
AT1G54390.2 Orysa4|Os03g53700.1  
AT1G68290.1 Orysa4|Os01g03740.1  
AT4G21585.1,AT1G11190.1 Orysa4|Os04g54390.1  
Orysa4|Os04g55850.1  
AT2G19910.1,AT2G19920.1,AT2G19930.1 Orysa4|Os01g10140.1  
Orysa4|Os01g10130.1  
AT1G75240.1,AT2G18350.1,AT1G14440.1 Orysa4|Os11g13930.1  
AT4G24660.1,AT5G65410.1 Orysa4|Os08g37400.1,Orysa4|Os09g29130.1  
AT3G50890.1,AT2G02540.1  
Orysa4|Os03g50920.1,Orysa4|Os04g35500.1  
Orysa4|Os05g50310.1  
AT1G52855.1 Orysa4|Os07g37700.1  
AT2G20835.1  
AT5G02480.1,AT3G12570.1,AT2G37570.1 Orysa4|Os01g05790.1  
Orysa4|Os02g07130.1,Orysa4|Os03g16910.1,Orysa4|Os01g62300.1  
AT2G46080.1,AT1G01550.1 Orysa4|Os10g36950.1  
AT4G01360.1  
AT3G61500.1  
Orysa4|Os04g57760.1  
AT4G04770.1 Orysa4|Os01g61400.1  
AT5G44316.1  
AT2G20190.1 Orysa4|Os02g40430.1,Orysa4|Os04g42840.1  
Orysa4|Os02g57120.1  
AT3G56160.1 Orysa4|Os02g32930.1  
AT3G20290.1 Orysa4|Os06g47330.1,Orysa4|Os02g06340.1  
AT4G05520.1  
Orysa4|Os04g57350.1  
AT1G66810.1 Orysa4|Os05g50080.1,Orysa4|Os01g45730.1  
AT1G68200.1  
AT2G27040.1 Orysa4|Os04g06770.1  
AT1G69440.1 Orysa4|Os03g33650.1  
AT1G31280.1 Orysa4|Os04g52540.1  
AT1G48410.2 Orysa4|Os04g47870.1,Orysa4|Os02g45070.1  
AT5G43810.1 Orysa4|Os06g39640.1  
AT5G21150.1  
AT1G31290.1  
Orysa4|Os01g16860.1  
Orysa4|Os04g52550.1  
Orysa4|Os03g23050.1,Orysa4|Os07g09020.1,Orysa4|Os03g47830.1,Orysa4|Os07g28850.1,Orysa4|Os03g58600.1  
Orysa4|Os02g07310.1  
Orysa4|Os03g57540.1  
Orysa4|Os02g40320.1  
AT3G04830.1,AT5G28220.1 Orysa4|Os02g03470.1  
AT4G10300.1 Orysa4|Os04g36760.1  
AT4G10290.1,AT4G10280.1

Orysa4|Os02g40700.1,Orysa4|Os04g43060.1  
AT3G11780.1,AT5G06480.1 Orysa4|Os03g57420.1,Orysa4|Os07g06590.1  
AT3G44100.1  
AT2G16005.1  
AT1G49400.1,AT3G18880.1 Orysa4|Os08g27090.1  
AT3G48070.2,AT5G62910.1 Orysa4|Os02g37030.1,Orysa4|Os04g38970.1  
AT1G74870.1  
AT2G32260.1 Orysa4|Os02g07720.1  
AT4G15130.1 Orysa4|Os08g06450.1,Orysa4|Os10g42790.1  
AT1G05270.1 Orysa4|Os05g42010.1  
AT2G32340.1  
AT4G22260.1 Orysa4|Os04g57320.1  
Orysa4|Os03g63010.1  
AT1G17820.1,AT1G73200.1 Orysa4|Os02g58110.1  
AT4G19150.1 Orysa4|Os10g43040.1  
AT2G03430.1 Orysa4|Os03g55110.1  
Orysa4|Os01g61330.1  
AT2G26310.1 Orysa4|Os06g10210.1,Orysa4|Os02g53810.1  
AT3G63170.1 Orysa4|Os07g38390.1  
AT5G43260.1 Orysa4|Os02g30320.1  
AT1G44446.1 Orysa4|Os10g41760.1,Orysa4|Os10g41780.1  
AT3G10820.1,AT5G05140.1 Orysa4|Os05g34210.1,Orysa4|Os07g44820.1  
Orysa4|Os01g17990.1  
Orysa4|Os03g24950.1  
AT5G27280.1 Orysa4|Os06g50870.1  
AT1G68730.1 Orysa4|Os01g42050.1  
AT1G27970.1,AT1G27310.1 Orysa4|Os08g42000.1  
AT1G11570.1  
AT1G15500.1,AT1G80300.1 Orysa4|Os02g11740.1,Orysa4|Os01g45910.1  
AT4G21100.1,AT4G05420.1 Orysa4|Os05g51480.1  
Orysa4|Os01g40320.1  
AT2G39650.1 Orysa4|Os01g74250.1  
AT4G32480.1,AT2G20670.1 Orysa4|Os01g54340.1,Orysa4|Os05g44300.1  
AT3G07350.1,AT3G25240.1 Orysa4|Os11g25040.1,Orysa4|Os01g68650.1  
AT1G12030.1  
AT5G51660.1 Orysa4|Os04g18010.1  
AT2G42450.1 Orysa4|Os09g39790.1  
AT5G08280.1 Orysa4|Os02g07230.1  
AT1G48430.1,AT3G17770.1 Orysa4|Os03g51000.1  
AT4G21010.1,AT4G20330.1 Orysa4|Os10g25770.1  
Orysa4|Os03g07930.1  
AT3G56190.1 Orysa4|Os08g18110.1  
AT3G56450.1  
AT4G34450.1 Orysa4|Os03g12590.1,Orysa4|Os07g10150.1  
AT2G16200.1  
AT1G28520.1,AT2G42400.1 Orysa4|Os05g43950.1,Orysa4|Os01g54930.1  
AT1G13590.1 Orysa4|Os03g12990.1,Orysa4|Os07g03200.1,Orysa4|Os11g35310.1  
AT5G65870.1,AT3G49780.1  
AT2G22860.1  
AT5G19580.1,AT1G67290.1 Orysa4|Os05g48520.1,Orysa4|Os01g48540.1  
AT1G19900.1,AT1G75620.1 Orysa4|Os03g15320.1  
AT1G14430.1,AT3G57620.1  
AT3G53950.1  
AT3G08600.1,AT4G01140.1,AT4G23720.1 Orysa4|Os06g06430.1  
Orysa4|Os12g02550.1  
AT1G09830.1 Orysa4|Os12g09540.1,Orysa4|Os08g09210.1  
ATMG00513.1,ATMG00665.1,ATMG00060.1 Orysa4|Os12g14939.1  
AT4G09830.1 Orysa4|Os01g40690.1,Orysa4|Os09g19640.1  
AT5G64780.1  
Orysa4|Os08g30730.1  
AT3G19240.1,AT4G33400.1 Orysa4|Os02g54780.1,Orysa4|Os02g08190.1  
AT3G05500.1 Orysa4|Os07g47510.1  
AT2G47780.1  
AT2G42200.1,AT3G57920.1 Orysa4|Os09g31438.1,Orysa4|Os08g39890.1  
AT1G02065.1 Orysa4|Os06g44860.1  
AT1G27370.1,AT1G27360.1,AT5G43270.1 Orysa4|Os02g04680.1  
AT1G69170.1  
Orysa4|Os04g46580.1,Orysa4|Os07g32170.1  
Orysa4|Os04g56170.1  
Orysa4|Os02g07780.1,Orysa4|Os06g45310.1  
AT5G19400.1,AT1G28260.1 Orysa4|Os08g21350.1  
AT2G25660.1 Orysa4|Os01g08420.1  
AT1G74440.1,AT1G18720.1 Orysa4|Os02g36870.1  
Orysa4|Os10g26700.1  
Orysa4|Os08g33680.1  
AT1G05860.1,AT2G31600.1,AT3G53860.1 Orysa4|Os12g12950.1,Orysa4|Os05g23840.1  
AT4G03560.1 Orysa4|Os01g48680.1  
AT5G08550.1 Orysa4|Os03g63670.1  
AT5G09210.1  
AT1G26665.1,AT5G41910.1 Orysa4|Os09g35920.1  
AT5G53480.1 Orysa4|Os12g38110.1  
Orysa4|Os03g18350.1,Orysa4|Os05g28510.1

AT4G04640.1 Orysa4|Os07g32880.1  
AT1G15700.1  
AT1G02880.3,AT2G44750.2 Orysa4|Os05g30454.1,Orysa4|Os01g70580.1  
Orysa4|Os01g25440.1  
AT5G55250.1 Orysa4|Os04g56950.1  
AT4G36470.1 Orysa4|Os01g50610.1,Orysa4|Os01g50480.1  
AT5G04380.1,AT5G04370.2,AT1G19640.1  
Orysa4|Os06g21760.1,Orysa4|Os04g57090.1,Orysa4|Os04g57080.1,Orysa4|Os06g21720.1,Orysa4|Os04  
g57070.1  
Orysa4|Os06g21820.1  
Orysa4|Os11g15060.1,Orysa4|Os11g15030.1,Orysa4|Os11g15340.1,Orysa4|Os11g15180.1  
Orysa4|Os06g13460.1  
Orysa4|Os06g20920.1  
AT5G14660.1 Orysa4|Os01g44980.1,Orysa4|Os01g45070.1  
AT3G23590.1,AT2G48110.1 Orysa4|Os07g11000.1  
Orysa4|Os05g24690.1  
Orysa4|Os05g24700.1,Orysa4|Os07g48350.1  
AT3G61600.1,AT2G46260.1 Orysa4|Os06g31100.1  
AT4G01160.1  
Orysa4|Os06g31090.1  
AT3G22890.1,AT4G14680.1,AT5G43780.1 Orysa4|Os03g53230.1  
AT1G19920.1  
AT5G66570.1,AT3G50820.1 Orysa4|Os01g31690.1  
AT4G37230.1  
AT1G56230.1 Orysa4|Os01g24480.1  
AT3G09100.2,AT5G01290.1 Orysa4|Os11g11070.1,Orysa4|Os12g09120.1  
AT5G28210.1  
AT5G20610.1 Orysa4|Os01g51640.1  
AT5G26160.1  
AT5G05010.1 Orysa4|Os01g61710.1,Orysa4|Os05g24594.1  
AT3G59280.1 Orysa4|Os10g33910.1  
AT5G61880.1  
AT5G63810.1 Orysa4|Os01g65460.1  
AT4G36360.1 Orysa4|Os03g06940.1  
AT3G13750.1 Orysa4|Os01g39830.1  
AT5G63800.1,AT1G77410.1 Orysa4|Os05g35360.1  
AT2G28470.1 Orysa4|Os03g15020.1  
AT2G16730.1,AT4G35010.1,AT4G38590.1 Orysa4|Os08g43570.1,Orysa4|Os09g36810.1  
AT1G45130.1  
AT3G52840.1,AT5G56870.1,AT4G26140.1  
AT3G53070.1  
AT5G20710.1  
AT2G32810.1  
Orysa4|Os06g37560.1,Orysa4|Os02g12730.1  
Orysa4|Os05g35370.1  
AT5G44600.1,AT5G44590.1 Orysa4|Os03g03470.1  
AT5G63100.1 Orysa4|Os02g28820.1  
AT1G05790.1 Orysa4|Os04g41200.1  
Orysa4|Os01g67420.1  
AT3G10620.1 Orysa4|Os04g58900.1  
AT1G30110.1  
AT5G06340.1  
AT4G27700.1 Orysa4|Os09g36040.1  
AT4G17600.1,AT5G47110.1 Orysa4|Os02g03330.1  
AT2G31090.1 Orysa4|Os01g11600.1,Orysa4|Os05g11900.1  
AT4G36390.1 Orysa4|Os11g38030.1  
AT1G51130.1,AT3G20760.1 Orysa4|Os02g10090.1,Orysa4|Os06g41380.1  
Orysa4|Os04g10870.1  
Orysa4|Os08g40010.1  
AT2G41835.1,AT3G57480.1 Orysa4|Os07g38240.1  
AT3G28210.1 Orysa4|Os09g21710.1  
AT5G48205.1  
AT1G06330.1 Orysa4|Os01g55320.1  
AT5G66110.1 Orysa4|Os03g06080.1  
AT2G18196.1 Orysa4|Os10g39210.1,Orysa4|Os03g02860.1  
AT1G66240.1 Orysa4|Os08g10480.1  
AT4G39700.1 Orysa4|Os09g20000.1,Orysa4|Os08g31140.1  
AT4G27590.1 Orysa4|Os04g49260.1  
AT1G29100.1  
AT1G22990.1,AT1G71050.1  
AT4G08570.1  
AT3G48970.1  
Orysa4|Os08g40130.1  
Orysa4|Os06g35060.1  
Orysa4|Os03g26650.1  
AT5G45030.1,AT2G35155.1 Orysa4|Os04g52479.1,Orysa4|Os08g31470.1  
AT3G12950.1  
AT4G40050.1 Orysa4|Os09g29470.1  
AT4G24820.1 Orysa4|Os02g38810.1,Orysa4|Os04g40850.1  
Orysa4|Os02g38800.1  
Orysa4|Os01g74360.1  
AT5G38110.1,AT1G66740.1 Orysa4|Os05g48030.1

Orysa4|Os01g49150.1  
AT2G38280.1 Orysa4|Os07g49270.1  
Orysa4|Os05g28180.1  
AT1G12360.1 Orysa4|Os02g25580.1,Orysa4|Os04g18030.1  
AT4G12120.1  
AT1G02010.1  
Orysa4|Os06g04450.1  
AT4G34215.1 Orysa4|Os04g20810.1  
Orysa4|Os03g64030.1,Orysa4|Os03g64050.1  
Orysa4|Os04g01980.1  
AT4G02260.1 Orysa4|Os03g22160.1  
AT2G37170.1,AT3G53420.1,AT5G60660.1,AT2G37180.1  
Orysa4|Os07g26630.1,Orysa4|Os02g41860.1,Orysa4|Os04g44060.1  
AT4G35100.1,AT2G16850.1 Orysa4|Os04g16450.1  
AT4G00430.1,AT2G45960.1,AT3G61430.1,AT4G23400.1,AT1G01620.1  
Orysa4|Os02g57720.1,Orysa4|Os02g44630.1  
Orysa4|Os10g34000.1  
Orysa4|Os03g64330.1  
Orysa4|Os04g47220.1  
AT1G35680.1 Orysa4|Os02g15900.1  
AT4G30930.1 Orysa4|Os05g48410.1  
AT3G14390.1,AT5G11880.1 Orysa4|Os02g24354.1  
AT4G10430.1,AT1G33230.1 Orysa4|Os02g01720.1  
Orysa4|Os08g05660.1  
AT1G72040.1 Orysa4|Os05g35520.1  
AT1G51310.1 Orysa4|Os03g07850.1  
AT2G34770.1,AT4G20870.1 Orysa4|Os03g56820.1  
AT1G76250.1 Orysa4|Os02g02730.1  
AT1G20860.1,AT1G76430.1 Orysa4|Os06g21950.1  
AT2G32830.1,AT5G43350.1,AT5G43370.1,AT5G43360.1,AT2G38940.1  
Orysa4|Os04g10750.1,Orysa4|Os10g30770.1,Orysa4|Os10g30790.1,Orysa4|Os03g05610.1,Orysa4|Os04  
g10690.1  
AT4G08878.1,AT5G43340.1  
AT4G08895.1  
Orysa4|Os06g21920.1  
Orysa4|Os06g21930.1  
Orysa4|Os10g20500.1,Orysa4|Os03g04360.1,Orysa4|Os08g45000.1  
Orysa4|Os04g10800.1  
Orysa4|Os02g39750.1,Orysa4|Os03g05640.1,Orysa4|Os03g05620.1  
Orysa4|Os01g46860.1  
AT3G01310.1,AT5G15070.1 Orysa4|Os03g48300.1  
Orysa4|Os01g56960.1,Orysa4|Os01g56980.1  
AT5G65840.1 Orysa4|Os03g51950.1  
Orysa4|Os03g51960.1  
AT2G44270.1,AT1G76170.1 Orysa4|Os02g52470.1  
Orysa4|Os01g41570.1  
AT5G11040.1 Orysa4|Os04g42370.1  
AT5G66680.1 Orysa4|Os07g10830.1  
AT3G54640.1,AT4G02610.1 Orysa4|Os07g08430.1,Orysa4|Os03g58260.1  
Orysa4|Os03g58290.1,Orysa4|Os03g58320.1  
AT3G52420.1 Orysa4|Os02g48480.1  
AT3G19760.1 Orysa4|Os03g36930.1,Orysa4|Os01g45190.1  
AT5G11200.1,AT5G11170.1 Orysa4|Os01g36920.1,Orysa4|Os01g36890.1  
AT2G42520.1,AT3G58570.1,AT3G58510.1 Orysa4|Os03g59050.1  
AT4G09730.1 Orysa4|Os01g08930.1  
AT1G31970.1 Orysa4|Os07g20580.1  
AT2G40700.1 Orysa4|Os05g01990.1  
AT4G16630.1 Orysa4|Os12g29660.1  
AT4G15850.1 Orysa4|Os02g55260.1  
AT2G47330.1 Orysa4|Os03g19530.1  
AT1G16280.1 Orysa4|Os07g43980.1  
AT3G22330.1,AT3G22310.1 Orysa4|Os07g05050.1  
AT5G60990.1 Orysa4|Os07g46580.1,Orysa4|Os03g46610.1  
AT1G59990.1 Orysa4|Os09g21520.1  
AT4G00660.1 Orysa4|Os10g35990.1,Orysa4|Os02g42860.1,Orysa4|Os04g45040.1  
AT3G01540.3,AT5G14610.1 Orysa4|Os01g36860.1  
AT3G06980.1 Orysa4|Os03g01830.1  
AT5G63120.2 Orysa4|Os01g68320.1  
AT1G12770.1 Orysa4|Os02g42406.1,Orysa4|Os03g12000.1  
AT5G51280.1 Orysa4|Os02g05660.1,Orysa4|Os06g48210.1  
AT5G08610.1,AT5G08620.1,AT5G63630.1 Orysa4|Os06g33520.1  
AT3G18600.1,AT5G65900.1 Orysa4|Os03g58810.1  
AT1G55150.1 Orysa4|Os01g10050.1  
AT3G09720.1 Orysa4|Os07g45360.1  
AT3G06480.1  
Orysa4|Os02g10770.1,Orysa4|Os06g48750.1,Orysa4|Os11g46240.1,Orysa4|Os02g57980.1,Orysa4|Os02  
g05330.1,Orysa4|Os07g33340.1,Orysa4|Os08g32090.1,Orysa4|Os01g43120.1,Orysa4|Os01g07080.1,Orysa4|Os03g  
50090.1,Orysa4|Os11g38670.1,Orysa4|Os01g43130.1,Orysa4|Os09g34910.1  
AT4G34910.1 Orysa4|Os03g51900.1  
AT5G19210.2 Orysa4|Os01g73900.1  
AT3G53110.1 Orysa4|Os03g06220.1  
AT3G16840.1 Orysa4|Os04g43140.1

AT1G51380.1  
AT3G61240.1,AT2G45810.1  
AT4G33370.1  
AT1G72730.1,AT1G54270.1  
AT1G63250.1,AT2G07750.1  
AT3G13920.2  
AT1G71280.1  
AT5G62190.1  
AT1G77050.1  
AT5G54910.1  
AT5G05450.1,AT1G71370.1  
AT2G33730.1  
AT3G02065.3  
Orysa4|Os06g40020.1  
Orysa4|Os06g34420.1  
AT3G24190.1 Orysa4|Os02g57160.1  
AT2G39190.2 Orysa4|Os02g56200.1  
AT5G24970.1 Orysa4|Os07g27480.1  
AT4G31390.1 Orysa4|Os11g11000.1  
AT1G71810.1 Orysa4|Os04g54790.1  
AT3G19190.1 Orysa4|Os06g15700.1  
AT5G09220.1,AT1G77380.1,AT5G63850.1 Orysa4|Os05g34980.1,Orysa4|Os01g66010.1  
AT5G23810.1 Orysa4|Os04g56470.1,Orysa4|Os04g39489.1  
AT1G58360.1,AT5G49630.1 Orysa4|Os07g04180.1  
AT1G44100.1  
AT1G10010.1  
Orysa4|Os12g09320.1,Orysa4|Os12g08090.1,Orysa4|Os12g08130.1  
Orysa4|Os08g32070.1,Orysa4|Os02g46810.1  
Orysa4|Os06g12350.1  
Orysa4|Os02g01210.1  
Orysa4|Os06g36210.1  
Orysa4|Os04g41350.1  
Orysa4|Os09g25880.1  
Orysa4|Os02g49060.1  
Orysa4|Os06g36180.1  
Orysa4|Os12g09300.1  
AT3G10210.1 Orysa4|Os01g71980.1  
AT4G35750.1 Orysa4|Os04g47330.1  
Orysa4|Os02g44820.1  
AT5G20570.1 Orysa4|Os01g01700.1  
AT3G42830.1  
Orysa4|Os02g47870.1  
AT1G71710.1 Orysa4|Os05g45900.1,Orysa4|Os01g51890.1  
AT3G63240.1 Orysa4|Os10g28660.1,Orysa4|Os03g06460.1,Orysa4|Os07g07950.1  
AT2G01900.1 Orysa4|Os03g13520.1  
AT5G65090.1 Orysa4|Os06g11920.1,Orysa4|Os02g51600.1  
AT1G47510.1 Orysa4|Os03g42810.1  
AT5G04980.1 Orysa4|Os05g41000.1  
AT2G37440.1 Orysa4|Os05g02350.1  
AT4G18010.1  
AT1G34120.2  
AT1G05470.1,AT2G32010.1  
Orysa4|Os01g08780.1  
Orysa4|Os08g32960.1,Orysa4|Os09g23140.1  
Orysa4|Os01g59880.1  
AT1G55480.1 Orysa4|Os07g07540.1  
AT2G35800.1 Orysa4|Os11g01270.1  
AT4G27940.1 Orysa4|Os08g29720.1  
AT2G46320.1  
Orysa4|Os01g12470.1  
AT4G23440.1 Orysa4|Os01g55530.1  
Orysa4|Os11g05350.1,Orysa4|Os11g36760.1  
AT1G44910.1,AT3G19670.1 Orysa4|Os01g34780.1  
AT5G17900.1,AT4G08580.1 Orysa4|Os02g17870.1  
Orysa4|Os02g19380.1  
Orysa4|Os11g11080.1  
Orysa4|Os06g22850.1  
AT1G44900.1 Orysa4|Os11g29380.1  
AT2G14050.1 Orysa4|Os06g11500.1  
AT3G09660.1 Orysa4|Os05g38850.1  
AT5G44635.1 Orysa4|Os05g14590.1  
AT2G16440.1 Orysa4|Os01g36390.1  
AT2G07690.1 Orysa4|Os02g55410.1  
AT4G02060.1 Orysa4|Os12g37400.1  
AT5G46280.1 Orysa4|Os05g39850.1  
Orysa4|Os10g20900.1  
Orysa4|Os05g08100.1  
AT5G13340.1 Orysa4|Os10g15390.1  
AT5G63770.1 Orysa4|Os12g12260.1  
AT5G07920.1 Orysa4|Os12g38780.1  
AT5G39490.1,AT5G39460.1,AT5G39480.1,AT5G39450.1 Orysa4|Os08g01430.1  
AT5G45500.1



Orysa4|Os01g58520.1,Orysa4|Os04g41380.1,Orysa4|Os11g42100.1,Orysa4|Os11g42060.1,Orysa4|Os01g72410.1,Orysa4|Os03g40250.1  
Orysa4|Os02g34490.1  
Orysa4|Os05g50790.1  
AT5G14540.1,AT3G01560.1 Orysa4|Os05g07730.1,Orysa4|Os01g07520.1  
AT1G15130.1 Orysa4|Os10g35250.1  
Orysa4|Os02g42580.1  
AT3G10810.1,AT3G56590.1 Orysa4|Os01g71220.1  
AT1G10790.1  
Orysa4|Os02g52910.1,Orysa4|Os09g28110.1  
Orysa4|Os05g30990.1  
AT3G63460.1,AT1G18830.1 Orysa4|Os07g46370.1  
Orysa4|Os02g03990.1  
AT1G11090.1 Orysa4|Os07g37840.1  
AT5G16120.1 Orysa4|Os10g04620.1  
AT1G52760.1 Orysa4|Os02g11720.1  
AT2G39400.1,AT2G39410.2,AT3G55180.1,AT2G39420.1 Orysa4|Os12g16180.1  
AT2G47630.1,AT3G62860.1 Orysa4|Os05g29974.1  
AT5G14980.1,AT5G19290.1 Orysa4|Os01g21560.1  
AT3G55190.1  
Orysa4|Os11g01040.1  
Orysa4|Os01g62010.1  
Orysa4|Os01g21310.1  
Orysa4|Os01g21300.1  
Orysa4|Os01g21580.1  
Orysa4|Os01g21520.1  
AT5G08530.1 Orysa4|Os07g45090.1  
AT1G04170.1 Orysa4|Os12g07740.1,Orysa4|Os12g41400.1  
AT2G18720.1,AT4G18330.2  
AT2G16940.1 Orysa4|Os03g05830.1  
AT5G09880.1  
AT5G19480.1,AT5G12230.1 Orysa4|Os03g44010.1,Orysa4|Os12g41962.1  
AT5G24020.1 Orysa4|Os06g01690.1  
AT4G35550.1 Orysa4|Os01g60270.1  
AT1G20700.1,AT1G20710.1  
AT5G49030.1 Orysa4|Os02g53770.1  
AT4G10320.1 Orysa4|Os06g43760.1  
Orysa4|Os02g09120.1  
Orysa4|Os02g09100.1  
AT5G35750.1,AT1G27320.1 Orysa4|Os10g21810.1  
AT2G01830.2 Orysa4|Os03g50860.1,Orysa4|Os02g50480.1  
Orysa4|Os01g69920.1  
Orysa4|Os07g38910.1  
AT5G49940.1 Orysa4|Os11g07916.1  
AT4G25910.1 Orysa4|Os06g47940.1  
Orysa4|Os12g07700.1  
AT5G64070.1,AT5G09350.1 Orysa4|Os11g10420.1  
AT1G13820.1,AT5G39220.1 Orysa4|Os07g41080.1  
AT4G04910.1 Orysa4|Os05g44310.1  
AT3G18640.1 Orysa4|Os08g04170.1  
Orysa4|Os05g41790.1  
AT4G33210.1 Orysa4|Os10g25680.1  
AT5G03220.1,AT5G03500.1 Orysa4|Os04g56640.1  
AT4G18900.1,AT4G18905.1 Orysa4|Os01g69970.1  
AT4G35370.1  
Orysa4|Os06g30680.1  
AT4G35150.1,AT4G35160.1  
Orysa4|Os06g16960.1,Orysa4|Os12g25450.1,Orysa4|Os11g20040.1,Orysa4|Os12g25490.1,Orysa4|Os07g27970.1,Orysa4|Os07g27880.1,Orysa4|Os11g20090.1,Orysa4|Os11g12760.1,Orysa4|Os11g20080.1,Orysa4|Os12g25820.1,Orysa4|Os09g17560.1,Orysa4|Os10g02840.1,Orysa4|Os11g33300.1,Orysa4|Os08g07260.1,Orysa4|Os08g19420.1,Orysa4|Os08g35310.1,Orysa4|Os05g43940.1,Orysa4|Os05g43930.1,Orysa4|Os10g02880.1,Orysa4|Os11g20160.1  
Orysa4|Os12g25870.1  
Orysa4|Os11g19880.1,Orysa4|Os11g19790.1,Orysa4|Os07g28040.1  
Orysa4|Os12g25860.1  
AT3G44530.1 Orysa4|Os09g39420.1  
AT5G54520.1 Orysa4|Os02g21490.1  
AT1G10580.1 Orysa4|Os03g27970.1  
AT4G39850.1 Orysa4|Os05g01700.1  
Orysa4|Os01g73530.1  
AT3G01150.1 Orysa4|Os03g25980.1,Orysa4|Os08g33830.1  
AT5G53180.1  
AT5G08400.1 Orysa4|Os02g58120.1  
AT4G29400.1 Orysa4|Os01g37820.1  
AT4G07410.1,AT1G27470.1 Orysa4|Os03g52470.1  
AT5G19330.1 Orysa4|Os05g33050.1  
AT5G13060.1  
AT1G68360.1 Orysa4|Os01g04120.1  
AT1G10480.1,AT1G67030.1  
Orysa4|Os01g32920.1  
AT1G04850.1 Orysa4|Os02g30180.1  
AT5G48690.1

Orysa4|Os08g41500.1  
AT2G26560.1 Orysa4|Os09g28770.1  
AT4G37060.1,AT4G37070.2  
AT4G37050.1  
Orysa4|Os01g67310.1,Orysa4|Os08g37180.1,Orysa4|Os08g37210.1,Orysa4|Os08g37250.1  
Orysa4|Os12g36610.1,Orysa4|Os12g36530.1,Orysa4|Os08g28880.1,Orysa4|Os03g27610.1  
Orysa4|Os11g40009.1  
AT2G45670.1 Orysa4|Os06g49790.1  
AT4G27790.1 Orysa4|Os04g58480.1  
AT5G08580.1 Orysa4|Os01g39134.1  
Orysa4|Os02g12880.1  
AT4G01610.1,AT1G02305.1,AT1G02300.1 Orysa4|Os05g24550.1  
AT5G46400.1,AT1G04080.1 Orysa4|Os08g29124.1,Orysa4|Os03g11200.1  
AT5G28840.1 Orysa4|Os10g28200.1,Orysa4|Os11g37890.1  
AT2G34680.1 Orysa4|Os07g05470.1  
AT4G24690.1 Orysa4|Os04g40090.1,Orysa4|Os02g38050.1  
AT5G62220.1 Orysa4|Os06g23420.1,Orysa4|Os04g48480.1  
AT4G22580.1 Orysa4|Os10g40559.1  
AT2G20370.1 Orysa4|Os03g05110.1  
AT1G68470.1  
AT1G63450.1  
AT2G31990.1,AT2G32750.1,AT2G32740.1,AT4G13990.1,AT2G29040.1  
Orysa4|Os10g32080.1,Orysa4|Os10g32110.1,Orysa4|Os10g32170.1  
Orysa4|Os03g05070.1  
Orysa4|Os10g32160.1  
AT2G44900.1,AT3G60350.1 Orysa4|Os10g41360.1  
AT2G14635.1  
AT1G77460.1 Orysa4|Os11g08090.1  
AT2G22125.1  
AT1G44120.1  
AT5G59520.1 Orysa4|Os01g74110.1  
AT1G55910.1 Orysa4|Os03g29850.1  
Orysa4|Os08g42150.1  
AT4G10750.1 Orysa4|Os09g36030.1  
AT4G24070.1,AT4G24080.1  
AT4G39720.1,AT5G65170.1,AT1G35830.1 Orysa4|Os08g31660.1,Orysa4|Os09g20460.1,Orysa4|Os03g26990.1  
Orysa4|Os07g43140.1  
Orysa4|Os02g51740.1  
AT5G59050.1 Orysa4|Os01g63050.1,Orysa4|Os05g37930.1  
AT2G39870.1,AT3G55690.1  
AT3G54000.1  
AT2G42330.1,AT1G17070.1 Orysa4|Os12g42140.1  
AT5G14530.1 Orysa4|Os05g46570.1  
AT5G66240.2 Orysa4|Os07g40030.1  
AT1G03940.1 Orysa4|Os07g23150.1,Orysa4|Os02g57480.1  
AT3G29720.1,AT3G29670.1,AT5G39050.1,AT5G61160.1,AT3G29635.1,AT3G29590.1,AT3G29680.1,AT5G39080.1,A  
T5G39090.1  
AT3G29636.1  
AT1G75330.1 Orysa4|Os02g47590.1  
AT1G11800.1 Orysa4|Os12g22620.1  
Orysa4|Os07g32610.1  
AT3G27430.2,AT5G40580.1 Orysa4|Os05g09490.1  
AT4G14800.1,AT3G22630.1 Orysa4|Os03g48930.1  
AT4G31600.1 Orysa4|Os06g08860.1  
AT3G15030.1,AT1G53230.1 Orysa4|Os01g11550.1  
AT2G31070.1  
Orysa4|Os01g55100.1  
AT1G64970.1 Orysa4|Os02g47310.1  
AT1G55840.1 Orysa4|Os02g10650.1,Orysa4|Os06g40510.1  
AT5G47730.1  
Orysa4|Os09g08390.1  
AT4G32160.1,AT2G25350.1,AT3G15920.1 Orysa4|Os06g43560.1  
AT3G17730.1 Orysa4|Os09g38000.1  
AT4G17980.1,AT5G46590.1,AT1G32510.1 Orysa4|Os10g42130.1  
AT4G28530.1 Orysa4|Os10g33760.1,Orysa4|Os04g43560.1,Orysa4|Os02g56600.1  
AT5G18270.1,AT5G61430.1,AT3G04060.1,AT5G39610.1,AT5G07680.1  
Orysa4|Os07g48550.1,Orysa4|Os03g21030.1  
AT1G62700.1,AT1G12260.1 Orysa4|Os02g42970.1  
AT2G43000.1 Orysa4|Os03g56580.1,Orysa4|Os12g43530.1,Orysa4|Os07g04560.1  
AT5G64530.1 Orysa4|Os04g35660.1,Orysa4|Os02g34970.1  
AT3G18400.1 Orysa4|Os03g42630.1  
AT4G35580.1,AT1G33060.2,AT3G49530.1,AT5G24590.2 Orysa4|Os08g06140.1,Orysa4|Os06g01230.1  
AT1G65910.1 Orysa4|Os03g02800.1  
AT1G76420.1 Orysa4|Os08g40030.1  
AT2G24430.1 Orysa4|Os09g32260.1  
AT3G44350.1,AT5G22380.1 Orysa4|Os12g05990.1,Orysa4|Os05g37080.1  
AT1G61110.1,AT3G15510.1,AT1G52880.1 Orysa4|Os07g37920.1  
AT4G36160.1,AT1G71930.1,AT2G18060.1 Orysa4|Os08g01330.1  
AT1G26870.1 Orysa4|Os02g51120.1,Orysa4|Os08g33910.1  
AT3G61910.1,AT2G46770.1 Orysa4|Os06g04090.1,Orysa4|Os08g02300.1  
AT1G79580.1 Orysa4|Os02g15340.1  
AT1G01720.1 Orysa4|Os05g34830.1,Orysa4|Os01g66120.1

AT2G17040.1 Orysa4|Os06g51070.1,Orysa4|Os03g04070.1  
 AT1G56010.2 Orysa4|Os06g46270.1,Orysa4|Os02g06950.1,Orysa4|Os08g10080.1  
 AT5G04410.1,AT3G10500.1,AT1G34180.1,AT1G32870.1,AT1G34190.1 Orysa4|Os09g32040.1  
 AT2G02450.2 Orysa4|Os05g34600.1,Orysa4|Os01g66490.1  
 AT5G53950.1 Orysa4|Os06g23650.1  
 AT5G22290.1,AT3G44290.1  
 AT1G03490.1  
 AT5G18300.1  
 AT5G62380.1  
 AT1G19040.1  
 AT3G12910.1  
 AT1G02250.1,AT1G02220.1,AT4G01550.1  
 AT4G01520.1  
 AT3G03200.1,AT5G17260.1  
 AT3G56530.1,AT1G54330.1  
 AT3G04420.1  
 AT5G39820.1  
 AT4G10350.1,AT1G32770.1,AT1G33280.1  
 AT5G50820.1  
 AT5G63790.1,AT5G08790.1  
 AT1G77450.1  
 AT1G64105.1  
 AT3G15170.1  
 Orysa4|Os09g38010.1  
 Orysa4|Os03g01870.1  
 Orysa4|Os02g41450.1  
 Orysa4|Os01g29840.1,Orysa4|Os01g01470.1  
 Orysa4|Os08g33670.1  
 Orysa4|Os11g03370.1,Orysa4|Os12g03050.1  
 Orysa4|Os02g36880.1,Orysa4|Os04g38720.1  
 Orysa4|Os04g45340.1  
 Orysa4|Os06g01480.1  
 Orysa4|Os11g03310.1  
 Orysa4|Os01g64310.1  
 Orysa4|Os11g45950.1  
 Orysa4|Os11g31360.1  
 Orysa4|Os01g59640.1  
 Orysa4|Os05g34310.1,Orysa4|Os07g48450.1  
 Orysa4|Os02g12310.1  
 Orysa4|Os08g42400.1  
 Orysa4|Os03g03540.1,Orysa4|Os10g38834.1  
 Orysa4|Os06g33940.1  
 Orysa4|Os05g43960.1,Orysa4|Os11g08210.1  
 Orysa4|Os01g60020.1  
 Orysa4|Os04g52810.1,Orysa4|Os12g41680.1  
 Orysa4|Os08g44820.1  
 Orysa4|Os10g21560.1  
 Orysa4|Os08g02160.1  
 AT5G45680.1 Orysa4|Os06g45340.1  
 AT5G64350.1 Orysa4|Os02g52290.1  
 AT3G25220.1 Orysa4|Os09g32526.1  
 AT4G39710.1 Orysa4|Os02g51570.1  
 AT5G48580.1  
 Orysa4|Os01g68710.1  
 AT1G18170.1 Orysa4|Os03g50080.1  
 AT1G73655.1  
 AT3G02060.1 Orysa4|Os11g32880.1  
 AT3G11540.1 Orysa4|Os08g44510.1  
 AT3G11590.1 Orysa4|Os04g31400.1,Orysa4|Os02g30280.1  
 AT5G22310.1  
 Orysa4|Os07g12920.1  
 Orysa4|Os05g34800.1  
 AT5G48230.2,AT5G47720.2 Orysa4|Os09g07830.1  
 Orysa4|Os01g02020.1  
 AT3G29270.1 Orysa4|Os03g31320.1,Orysa4|Os03g11260.1  
 AT1G69330.1  
 AT1G74370.1  
 AT2G12646.1 Orysa4|Os06g45540.1,Orysa4|Os02g07650.1  
 AT4G17900.1,AT1G32700.1 Orysa4|Os02g46610.1,Orysa4|Os04g50120.1  
 AT1G21000.1,AT1G76590.1 Orysa4|Os06g41930.1  
 AT2G17785.1  
 AT3G60670.1  
 AT5G46710.1  
 AT1G43000.1  
 Orysa4|Os02g09070.1  
 Orysa4|Os08g44620.1,Orysa4|Os10g42410.1,Orysa4|Os01g33370.1  
 Orysa4|Os02g10000.1  
 AT1G77180.1 Orysa4|Os02g52250.1  
 Orysa4|Os02g38400.1,Orysa4|Os06g11420.1  
 AT2G16710.1 Orysa4|Os12g30030.1,Orysa4|Os01g01610.1  
 AT2G36260.1  
 AT2G05160.1,AT3G52980.1 Orysa4|Os08g03310.1

Orysa4|Os07g39440.1  
AT2G42160.1 Orysa4|Os04g55480.1  
AT2G26000.2 Orysa4|Os02g09060.1  
AT2G27160.1  
AT4G04200.1,AT2G39960.1 Orysa4|Os02g35720.1  
Orysa4|Os04g36859.1  
Orysa4|Os04g36868.1  
AT2G15440.1,AT5G67210.1,AT3G50220.1 Orysa4|Os02g06380.1,Orysa4|Os04g55640.1,Orysa4|Os06g47310.1  
Orysa4|Os05g37530.1  
AT1G73560.1,AT1G73550.1,AT1G18280.1 Orysa4|Os06g49770.1  
AT1G62790.1 Orysa4|Os06g47200.1,Orysa4|Os11g34660.1  
AT4G12360.1  
AT2G32910.1 Orysa4|Os06g12260.1  
AT5G61910.3  
AT1G32340.1 Orysa4|Os04g50720.1  
Orysa4|Os02g46720.1,Orysa4|Os02g46730.1  
Orysa4|Os04g50760.1  
Orysa4|Os02g46740.1  
Orysa4|Os04g50740.1  
AT1G53400.1 Orysa4|Os09g17620.1  
AT1G16960.1  
Orysa4|Os05g45320.1  
AT5G47970.1,AT3G63510.1 Orysa4|Os04g21000.1  
AT1G74310.1 Orysa4|Os05g44340.1  
AT5G50920.1 Orysa4|Os04g32560.1,Orysa4|Os12g12850.1  
AT5G15450.1 Orysa4|Os03g31300.1  
AT2G25140.1 Orysa4|Os02g08490.1  
AT5G51070.1 Orysa4|Os02g32520.1  
AT4G14670.1  
AT3G48870.1  
AT3G45450.1  
Orysa4|Os11g16670.1  
Orysa4|Os11g16590.1  
Orysa4|Os02g33420.1  
Orysa4|Os04g33210.1  
AT3G49070.1 Orysa4|Os03g05440.1  
Orysa4|Os04g34590.1  
AT1G59660.1,AT1G10390.1 Orysa4|Os12g06870.1,Orysa4|Os01g28690.1  
AT1G63540.1  
Orysa4|Os12g06890.1  
AT3G12400.1,AT5G13860.1 Orysa4|Os02g58640.1  
AT2G38830.1  
AT1G14570.1 Orysa4|Os04g57520.1  
AT3G23605.1,AT1G59550.1,AT4G14250.1  
Orysa4|Os07g19390.1,Orysa4|Os02g42800.1  
AT1G03780.2 Orysa4|Os07g32390.1  
AT5G44270.1  
AT3G60030.1,AT2G47070.1 Orysa4|Os03g61760.1  
AT4G29530.1 Orysa4|Os01g52230.1,Orysa4|Os01g41660.1  
AT1G17710.1,AT1G73010.1  
AT5G24690.1 Orysa4|Os12g18630.1  
AT4G33760.1 Orysa4|Os01g06020.1  
AT4G25680.1,AT4G25660.1 Orysa4|Os10g38970.1  
Orysa4|Os06g01780.1  
AT5G23050.1 Orysa4|Os09g21230.1  
AT1G15120.1,AT2G01090.1 Orysa4|Os11g06340.1  
Orysa4|Os02g33730.1  
AT1G14290.1,AT1G69640.1 Orysa4|Os02g51150.1,Orysa4|Os06g12250.1  
Orysa4|Os06g22490.1  
Orysa4|Os07g43460.1  
AT1G16740.1 Orysa4|Os05g45220.1,Orysa4|Os01g53280.1  
ATCG00660.1  
AT5G11840.1 Orysa4|Os05g46250.1  
AT5G67370.1 Orysa4|Os03g32490.1  
AT5G24310.1,AT3G49290.1 Orysa4|Os01g37110.1  
AT5G42030.1  
Orysa4|Os01g13530.1  
AT1G34370.1 Orysa4|Os01g65080.1  
Orysa4|Os03g62230.1  
Orysa4|Os12g07280.1  
AT5G42500.1,AT1G65870.1,AT5G42510.1,AT1G22900.1  
Orysa4|Os11g07740.1,Orysa4|Os11g07830.1,Orysa4|Os11g07770.1  
AT3G13660.1,AT3G13650.1,AT3G13662.1,AT5G49040.1,AT1G58170.1,AT1G55210.1  
Orysa4|Os11g07680.1,Orysa4|Os11g07670.1,Orysa4|Os12g07580.1,Orysa4|Os11g07690.1  
AT2G21110.1,AT4G38700.1 Orysa4|Os03g59440.1  
AT2G21100.1  
Orysa4|Os11g10790.1,Orysa4|Os11g42550.1,Orysa4|Os11g10800.1,Orysa4|Os07g01680.1,Orysa4|Os11  
g10850.1  
Orysa4|Os08g28790.1,Orysa4|Os07g01620.1,Orysa4|Os07g01660.1,Orysa4|Os11g42500.1,Orysa4|Os07  
g01630.1  
Orysa4|Os07g42520.1,Orysa4|Os07g42570.1,Orysa4|Os10g25870.1  
Orysa4|Os11g27620.1

Orysa4|Os11g10840.1  
Orysa4|Os11g10870.1  
AT4G10710.1 Orysa4|Os04g25550.1  
AT4G10670.1  
Orysa4|Os08g31240.1  
AT2G20280.1 Orysa4|Os01g61830.1  
AT3G59020.2,AT2G31660.1 Orysa4|Os04g26850.1  
Orysa4|Os04g26860.1,Orysa4|Os02g27470.1  
AT2G38050.1 Orysa4|Os11g08110.1,Orysa4|Os01g63260.1  
AT1G52160.1,AT3G16260.1 Orysa4|Os01g13150.1  
AT2G35020.1,AT1G31070.2 Orysa4|Os04g52370.1,Orysa4|Os08g10600.1  
AT4G22330.1 Orysa4|Os03g49180.1  
AT3G09360.1,AT2G01280.1,AT2G45100.1 Orysa4|Os05g23940.1  
AT5G37510.2 Orysa4|Os03g50540.1  
AT3G19720.1 Orysa4|Os12g07880.1  
AT5G01670.2 Orysa4|Os05g39690.1  
AT1G59960.1,AT1G59950.1  
Orysa4|Os10g02390.1,Orysa4|Os10g02480.1,Orysa4|Os04g37480.1,Orysa4|Os04g37490.1,Orysa4|Os10g02490.1,Orysa4|Os04g08550.1,Orysa4|Os10g02380.1  
AT2G37770.2,AT3G53880.1,AT2G37790.1 Orysa4|Os01g62860.1,Orysa4|Os01g62870.1  
AT5G62420.1  
AT2G37760.1  
Orysa4|Os03g13390.1  
Orysa4|Os01g62880.1  
Orysa4|Os05g38220.1,Orysa4|Os05g38230.1  
Orysa4|Os10g02470.1  
AT5G05520.1,AT3G11070.1 Orysa4|Os05g39390.1  
Orysa4|Os11g01490.1,Orysa4|Os12g01500.1  
AT2G47020.1 Orysa4|Os05g19630.1  
AT1G70650.1 Orysa4|Os03g50430.1  
AT1G55040.1 Orysa4|Os07g22024.1  
AT1G49340.1 Orysa4|Os03g50320.1  
AT1G51040.1  
AT1G50030.1 Orysa4|Os05g14550.1  
AT3G54290.1 Orysa4|Os01g64250.1  
AT2G04630.1,AT5G51940.1 Orysa4|Os07g27930.1,Orysa4|Os03g38960.1  
Orysa4|Os07g27890.1  
Orysa4|Os08g32990.1  
AT3G45750.1 Orysa4|Os08g44560.1  
AT2G39740.1 Orysa4|Os01g62790.1  
AT3G45760.1  
Orysa4|Os01g62780.1  
AT4G32060.1 Orysa4|Os04g42430.1,Orysa4|Os02g39950.1  
AT3G50520.1 Orysa4|Os12g04120.1,Orysa4|Os08g37140.1,Orysa4|Os11g04320.1  
AT5G04120.1  
AT5G66010.1 Orysa4|Os11g03890.1  
AT3G20890.1  
Orysa4|Os12g03710.1  
AT3G55510.1,AT2G18220.1 Orysa4|Os10g35280.1,Orysa4|Os12g06610.1  
AT5G11430.1,AT5G25520.2,AT2G25640.1 Orysa4|Os06g39480.1,Orysa4|Os02g11780.1  
Orysa4|Os04g55190.1  
AT2G35640.1,AT1G31310.1 Orysa4|Os04g57530.1  
AT3G49590.1,AT3G18770.1 Orysa4|Os04g45570.1,Orysa4|Os02g43040.1  
Orysa4|Os11g06320.1  
AT5G20500.1 Orysa4|Os06g44910.1  
AT1G77370.1 Orysa4|Os02g43180.1  
AT4G22310.1 Orysa4|Os07g36800.1,Orysa4|Os07g26700.1  
AT4G14695.1  
AT4G05590.2  
Orysa4|Os08g25590.1  
AT1G29150.1 Orysa4|Os04g36700.1  
Orysa4|Os03g37950.1  
AT5G22140.1,AT3G44190.1 Orysa4|Os02g05680.1  
Orysa4|Os11g05970.1  
AT3G11040.1,AT5G05460.1 Orysa4|Os05g27960.1  
AT3G61010.1  
Orysa4|Os06g20130.1  
AT4G02770.1,AT1G03130.1 Orysa4|Os08g44680.1  
AT3G12070.1,AT5G12210.1 Orysa4|Os08g40140.1  
Orysa4|Os11g32090.1  
AT4G34640.1,AT4G34650.1 Orysa4|Os07g10130.1,Orysa4|Os03g59040.1  
AT5G19470.1,AT5G19460.1 Orysa4|Os09g15340.1  
AT5G65687.1,AT5G64500.1,AT2G22730.1 Orysa4|Os04g44430.1  
AT5G23720.1 Orysa4|Os01g20940.1  
AT3G23610.1 Orysa4|Os01g29469.1  
AT3G06110.2  
Orysa4|Os01g24470.1  
AT5G18860.1 Orysa4|Os05g33644.1  
AT5G18870.1  
AT5G18890.1  
Orysa4|Os05g33630.1  
AT5G15540.1 Orysa4|Os07g01940.1

AT5G58440.1,AT5G07120.1 Orysa4|Os05g27920.1  
Orysa4|Os01g61150.1  
AT5G59710.1 Orysa4|Os02g54120.1  
Orysa4|Os05g40790.1  
AT1G56700.1 Orysa4|Os03g25270.1,Orysa4|Os09g23280.1,Orysa4|Os07g44610.1  
AT1G23440.1  
AT4G02020.1 Orysa4|Os03g19480.1  
AT2G23380.1 Orysa4|Os06g16390.1  
AT1G02580.1  
AT1G12430.1 Orysa4|Os06g04560.1  
AT2G47500.1 Orysa4|Os03g18980.1  
AT2G22610.1,AT1G72250.1 Orysa4|Os03g02290.1  
AT3G63480.1 Orysa4|Os08g02380.1  
AT5G27550.1 Orysa4|Os05g33030.1  
AT4G39050.1,AT2G21380.1 Orysa4|Os10g36880.1  
AT5G06670.1,AT3G12020.1 Orysa4|Os02g53520.1  
AT3G20150.1 Orysa4|Os03g39020.1  
AT1G20060.1 Orysa4|Os02g01180.1  
AT5G02370.1 Orysa4|Os05g38480.1  
AT3G43210.1,AT5G54670.1,AT3G17360.1,AT3G10310.1,AT5G66310.1,AT4G24170.1,AT4G21270.1,AT5G27000.1,AT1G01950.1,AT5G42490.1,AT4G14150.1,AT3G23670.1,AT3G50240.1,AT5G27950.1,AT1G63640.2,AT1G59540.1,AT1G18550.1,AT4G05190.1,AT3G19050.1,AT2G21300.1,AT3G10180.1,AT3G54870.1,AT5G65930.2,AT3G16060.1,AT5G47820.1,AT3G51150.1,AT3G49650.1,AT5G41310.1,AT5G23910.1,AT2G28620.1,AT3G44050.1,AT1G55550.1,AT1G73860.1,AT2G37420.1,AT4G27180.1,AT4G14330.1,AT1G18370.1,AT2G36200.1,AT3G44730.1,AT3G45850.1,AT4G38950.1,AT1G21730.1,AT1G09170.1,AT5G60930.1,AT1G18410.1  
Orysa4|Os08g43400.1,Orysa4|Os08g44420.1,Orysa4|Os03g56260.1,Orysa4|Os02g43130.1,Orysa4|Os04g57140.1,Orysa4|Os11g35090.1,Orysa4|Os01g54080.1,Orysa4|Os12g36100.1,Orysa4|Os06g36080.1,Orysa4|Os11g37140.1,Orysa4|Os05g02670.1,Orysa4|Os04g28260.1,Orysa4|Os01g14090.1,Orysa4|Os02g13570.1,Orysa4|Os11g42800.1,Orysa4|Os03g64415.1,Orysa4|Os12g42160.1,Orysa4|Os01g33040.1,Orysa4|Os11g44880.1,Orysa4|Os02g28850.1,Orysa4|Os04g30720.1,Orysa4|Os03g05820.1,Orysa4|Os02g43050.1,Orysa4|Os09g35890.1,Orysa4|Os01g4270.1,Orysa4|Os04g53760.1,Orysa4|Os04g45580.1,Orysa4|Os01g15540.1,Orysa4|Os02g56540.1,Orysa4|Os03g53920.1,Orysa4|Os12g39980.1,Orysa4|Os09g02650.1  
AT5G55520.1,AT4G26660.1  
AT5G33300.1  
Orysa4|Os04g35510.1  
Orysa4|Os06g10500.1  
Orysa4|Os06g10480.1  
Orysa4|Os02g50910.1  
Orysa4|Os07g44400.1  
AT3G04580.1,AT3G23150.1 Orysa4|Os04g08740.1,Orysa4|Os02g57530.1  
AT1G66340.1 Orysa4|Os03g49500.1  
AT1G04310.1  
AT2G40940.1  
Orysa4|Os06g38130.1  
Orysa4|Os07g28060.1,Orysa4|Os07g15540.1  
AT3G56740.1,AT2G41160.1 Orysa4|Os01g16330.1  
Orysa4|Os01g59160.1  
AT1G30680.1 Orysa4|Os06g45980.1  
AT1G30660.1  
AT3G57290.1 Orysa4|Os07g12110.1,Orysa4|Os07g32040.1,Orysa4|Os07g07250.1  
AT2G39240.1,AT2G34750.1,AT1G30590.1 Orysa4|Os06g47350.1  
AT1G43710.1 Orysa4|Os02g33710.1  
Orysa4|Os04g04640.1  
Orysa4|Os06g26170.1  
Orysa4|Os10g01640.1  
AT2G35610.1 Orysa4|Os03g38930.1  
AT4G23100.1 Orysa4|Os07g27790.1,Orysa4|Os05g03820.1  
AT1G26300.1,AT1G69030.1 Orysa4|Os02g49450.1  
AT3G24820.1  
AT4G30490.1,AT4G28070.2 Orysa4|Os08g16480.1  
AT5G53550.1,AT5G24380.1 Orysa4|Os04g45860.1,Orysa4|Os04g45900.1,Orysa4|Os02g43370.1  
AT3G27020.1,AT5G41000.1 Orysa4|Os04g32050.1  
AT1G48370.1,AT3G17650.1,AT1G65730.1 Orysa4|Os04g57840.1  
AT4G24120.1  
Orysa4|Os02g43410.1  
Orysa4|Os04g32060.1  
Orysa4|Os04g44330.1,Orysa4|Os04g44300.1,Orysa4|Os04g44320.1,Orysa4|Os02g42220.1  
Orysa4|Os05g16280.1,Orysa4|Os02g02460.1,Orysa4|Os01g13710.1,Orysa4|Os05g16290.1  
Orysa4|Os08g17830.1,Orysa4|Os02g02450.1,Orysa4|Os01g61390.1  
Orysa4|Os01g09290.1  
Orysa4|Os03g56640.1  
AT1G21312.1,AT1G76940.1 Orysa4|Os06g03690.1,Orysa4|Os08g43360.1  
Orysa4|Os09g35850.1  
AT1G18270.1 Orysa4|Os06g14740.1  
AT3G53180.1 Orysa4|Os10g31820.1  
AT3G13445.1,AT1G55520.1 Orysa4|Os03g45410.1,Orysa4|Os12g39070.1  
Orysa4|Os10g29660.1  
AT1G78900.1 Orysa4|Os06g45120.1,Orysa4|Os02g07870.1  
AT1G16820.1  
AT2G23820.2 Orysa4|Os02g08260.1  
AT1G26160.1  
AT1G31180.1,AT5G14200.1,AT1G80560.1 Orysa4|Os03g45320.1

AT5G37830.1 Orysa4|Os01g73514.1  
Orysa4|Os07g20140.1  
AT2G07050.1 Orysa4|Os02g04710.1  
AT1G78950.1,AT1G78955.1,AT5G36150.1,AT4G15370.1,AT1G66960.1,AT4G15340.1,AT1G78970.1,AT1G78960.1,AT1G78500.1  
AT3G45130.1  
AT5G42600.1,AT5G48010.1  
AT1G78480.1  
Orysa4|Os11g08569.1  
Orysa4|Os06g28830.1,Orysa4|Os02g04760.1,Orysa4|Os11g18194.1  
Orysa4|Os02g04690.1  
Orysa4|Os11g35710.1,Orysa4|Os11g18366.1,Orysa4|Os02g04730.1,Orysa4|Os02g04750.1  
Orysa4|Os05g14800.1,Orysa4|Os06g28820.1  
Orysa4|Os11g18310.1  
Orysa4|Os08g12730.1  
AT2G14110.1 Orysa4|Os03g52720.1,Orysa4|Os03g52730.1  
Orysa4|Os11g24630.1  
AT3G55800.1 Orysa4|Os04g16680.1  
AT3G18380.2 Orysa4|Os06g29020.1  
Orysa4|Os06g28880.1  
Orysa4|Os09g17770.1  
AT3G56640.1 Orysa4|Os03g06760.1,Orysa4|Os10g27990.1  
AT4G02350.1 Orysa4|Os01g24950.1  
Orysa4|Os06g33170.1  
AT4G26430.1,AT5G56280.1 Orysa4|Os08g39070.1  
Orysa4|Os12g42810.1,Orysa4|Os12g42730.1  
AT1G01230.1 Orysa4|Os04g47970.1,Orysa4|Os02g45180.1  
AT5G42000.1  
Orysa4|Os07g26940.1  
AT1G02860.1 Orysa4|Os07g47590.1  
AT2G38920.1 Orysa4|Os03g44810.1  
AT1G16320.1,AT1G79510.1 Orysa4|Os04g52330.1  
AT2G46220.1 Orysa4|Os01g12200.1  
AT5G40820.1 Orysa4|Os06g50910.1  
AT5G41220.1,AT5G41240.1,AT5G41210.1 Orysa4|Os11g37730.1  
AT1G01260.1,AT2G46510.1 Orysa4|Os01g13460.1  
AT4G37850.1,AT2G22750.1 Orysa4|Os03g51580.1  
AT1G32640.1,AT4G17880.1,AT5G46760.1 Orysa4|Os10g42430.1  
AT2G28160.1 Orysa4|Os04g31290.1  
AT2G22760.1,AT2G22770.1  
AT5G46830.1  
AT4G00870.1  
Orysa4|Os01g50940.1  
Orysa4|Os10g01530.1  
Orysa4|Os03g46860.1,Orysa4|Os12g43620.1  
Orysa4|Os03g46790.1  
Orysa4|Os09g34330.1  
AT5G50330.1,AT4G24810.2 Orysa4|Os01g67720.1  
AT5G22300.1 Orysa4|Os02g42330.1,Orysa4|Os02g42350.1  
AT3G44310.1,AT3G44320.1,AT3G44300.1  
AT5G12040.1 Orysa4|Os03g07910.1  
Orysa4|Os06g10420.1  
AT1G22520.1,AT1G72170.1 Orysa4|Os03g62420.1  
AT5G57590.1 Orysa4|Os08g14770.1  
AT5G57600.1  
AT5G12300.1,AT5G55530.1 Orysa4|Os01g72420.1  
Orysa4|Os03g09840.1  
Orysa4|Os07g39620.1  
AT4G39800.1,AT2G22240.1,AT5G10170.1 Orysa4|Os03g09250.1  
Orysa4|Os10g22450.1  
AT3G03630.1 Orysa4|Os01g59920.1  
AT3G61440.1 Orysa4|Os04g08350.1  
AT4G14880.1 Orysa4|Os12g42980.1  
AT1G55880.1 Orysa4|Os03g11660.1  
AT2G43750.1,AT3G59760.1 Orysa4|Os01g74650.1  
AT3G22460.1  
Orysa4|Os06g36880.1,Orysa4|Os06g05690.1,Orysa4|Os06g36840.1,Orysa4|Os02g12900.1,Orysa4|Os06g36830.1  
AT5G17530.1 Orysa4|Os07g26610.1  
AT1G70820.1 Orysa4|Os06g28194.1  
AT1G11915.1 Orysa4|Os06g25950.1  
AT1G10380.1  
AT3G28760.2 Orysa4|Os03g07420.1  
AT5G15510.1,AT3G01015.1 Orysa4|Os03g11400.1  
AT5G37478.1  
Orysa4|Os09g13650.1  
AT1G54460.1 Orysa4|Os07g08790.1,Orysa4|Os03g58480.1  
AT5G28646.1,AT3G04630.1  
AT3G23090.1  
AT3G12130.1,AT5G06770.1 Orysa4|Os02g10080.1,Orysa4|Os04g57010.1  
AT1G04970.1 Orysa4|Os06g20430.1  
Orysa4|Os09g30474.1

AT5G04940.1,AT1G73100.1 Orysa4|Os01g59620.1,Orysa4|Os11g03700.1,Orysa4|Os05g41172.1  
AT5G13960.1 Orysa4|Os01g70220.1  
AT2G35160.1,AT2G22740.1 Orysa4|Os09g19830.1  
AT2G33290.1,AT4G13460.1 Orysa4|Os07g25450.1  
AT5G47150.1,AT5G47160.1  
Orysa4|Os03g20430.1,Orysa4|Os11g38900.1  
Orysa4|Os08g30850.1,Orysa4|Os08g30870.1,Orysa4|Os08g30910.1  
Orysa4|Os04g45990.1  
Orysa4|Os08g45130.1  
AT2G38560.1 Orysa4|Os07g12630.1,Orysa4|Os03g60130.1  
AT2G25610.1,AT4G32530.1 Orysa4|Os01g42430.1  
AT4G26780.1,AT5G55200.1 Orysa4|Os09g11250.1,Orysa4|Os08g25090.1  
AT1G19110.1 Orysa4|Os07g42280.1,Orysa4|Os03g29350.1  
AT1G72500.1  
AT3G55350.1 Orysa4|Os01g62160.1,Orysa4|Os11g47650.1  
AT3G63270.1 Orysa4|Os07g07880.1  
Orysa4|Os06g06910.1  
AT2G16950.1 Orysa4|Os04g59494.1  
AT2G16960.1  
AT5G57960.1 Orysa4|Os11g38020.1  
AT4G30950.1 Orysa4|Os08g34220.1  
AT2G46110.1,AT3G61530.1 Orysa4|Os01g12560.1  
Orysa4|Os01g12570.1  
AT3G06860.1 Orysa4|Os05g06300.1,Orysa4|Os01g24680.1  
AT4G16800.1 Orysa4|Os02g43710.1,Orysa4|Os02g43720.1  
AT4G29010.1 Orysa4|Os02g17390.1  
Orysa4|Os05g29880.1  
AT5G41370.1,AT5G41360.1 Orysa4|Os01g49680.1  
AT1G67370.1 Orysa4|Os09g32930.1  
Orysa4|Os09g20800.1  
Orysa4|Os12g41350.1,Orysa4|Os03g10570.1  
Orysa4|Os01g07170.1  
Orysa4|Os03g10580.1  
AT1G65260.1 Orysa4|Os01g67000.1  
AT5G24130.1 Orysa4|Os02g15740.1  
AT4G16340.1 Orysa4|Os03g21080.1  
AT5G17350.1,AT3G03280.1 Orysa4|Os05g47960.1,Orysa4|Os01g49210.1  
AT4G02090.1 Orysa4|Os03g19260.1  
AT1G78450.1,AT1G17100.1 Orysa4|Os01g11230.1  
AT1G78460.1  
AT1G06440.1 Orysa4|Os10g36680.1  
AT2G31290.1 Orysa4|Os06g15550.1  
AT5G21970.1 Orysa4|Os11g34160.1,Orysa4|Os03g08350.1  
AT1G71850.1 Orysa4|Os03g44430.1  
AT5G45790.1 Orysa4|Os12g03630.1,Orysa4|Os02g26550.1  
AT4G33495.1 Orysa4|Os01g43040.1  
AT5G48040.1 Orysa4|Os02g32540.1  
AT5G62990.1 Orysa4|Os04g24710.1  
AT2G39120.1 Orysa4|Os03g57270.1  
AT3G58520.1 Orysa4|Os04g46170.1  
AT4G24320.1  
Orysa4|Os05g49610.1  
AT5G55810.1 Orysa4|Os02g56980.1,Orysa4|Os09g17870.1  
Orysa4|Os03g41470.1  
AT3G11530.2 Orysa4|Os01g73570.1  
AT2G33385.1 Orysa4|Os04g43290.1  
AT1G30825.1 Orysa4|Os01g46580.1  
AT2G34840.1,AT1G30630.1 Orysa4|Os04g52270.1  
Orysa4|Os04g55200.1  
AT1G48520.1 Orysa4|Os11g34210.1  
AT1G45230.1 Orysa4|Os02g52744.1  
AT3G46630.1 Orysa4|Os08g21700.1  
AT4G20050.1 Orysa4|Os04g52320.1  
AT4G20040.1  
AT2G25740.1 Orysa4|Os05g44590.1,Orysa4|Os01g54040.1  
AT3G23890.1 Orysa4|Os02g47150.1  
AT2G13720.1  
Orysa4|Os01g13310.1  
AT5G64260.1,AT4G08950.1,AT5G09440.1,AT1G35140.1 Orysa4|Os06g11650.1,Orysa4|Os08g37840.1  
AT5G51550.1 Orysa4|Os06g04250.1  
AT3G02970.1  
AT2G17230.1  
Orysa4|Os06g11660.1,Orysa4|Os02g51970.1,Orysa4|Os02g52010.1,Orysa4|Os02g52000.1,Orysa4|Os06  
g11700.1,Orysa4|Os06g11680.1  
AT1G79690.1 Orysa4|Os02g55030.1  
AT2G38710.1 Orysa4|Os10g42250.1  
AT1G22930.1 Orysa4|Os04g35860.1,Orysa4|Os02g35080.1,Orysa4|Os04g35840.1  
AT4G09150.1  
AT5G36210.1 Orysa4|Os06g11190.1,Orysa4|Os06g11180.1  
AT5G18410.1 Orysa4|Os03g05020.1  
AT2G16060.1 Orysa4|Os03g13140.1,Orysa4|Os03g13160.1,Orysa4|Os03g13150.1,Orysa4|Os03g12510.1  
AT3G10520.1



Orysa4|Os05g44140.1  
AT2G15290.1 Orysa4|Os06g43130.1,Orysa4|Os02g09470.1  
AT2G26110.1,AT4G26130.1 Orysa4|Os06g37020.1  
AT5G56980.1 Orysa4|Os01g51310.1,Orysa4|Os05g46340.1  
Orysa4|Os08g31090.1,Orysa4|Os09g19970.1  
AT1G70770.1,AT1G23170.1 Orysa4|Os01g03760.1  
AT3G11880.1  
AT4G22770.1,AT4G12080.1 Orysa4|Os08g02490.1,Orysa4|Os02g03270.1  
AT2G33620.1 Orysa4|Os08g40150.1,Orysa4|Os09g31470.1  
AT1G63480.1,AT1G63470.1 Orysa4|Os02g57820.1  
AT4G00200.1  
AT5G51590.1,AT5G62260.1,AT4G25320.1  
AT5G28590.1  
AT2G36560.1  
AT2G45850.1,AT3G61310.1  
Orysa4|Os03g01540.1  
Orysa4|Os12g05200.1,Orysa4|Os11g05160.1  
Orysa4|Os06g22030.1  
Orysa4|Os04g49990.1  
AT3G59360.1 Orysa4|Os02g39200.1,Orysa4|Os04g41320.1  
AT2G43240.1  
Orysa4|Os01g67330.1  
AT2G32520.1 Orysa4|Os01g34700.1  
AT2G36300.1,AT3G52760.1 Orysa4|Os03g17990.1  
AT2G27900.1 Orysa4|Os10g39910.1  
AT1G50920.1 Orysa4|Os06g09570.1,Orysa4|Os07g01920.1  
AT3G23860.1,AT1G10300.1  
AT3G43240.1 Orysa4|Os08g35000.1,Orysa4|Os09g26390.1  
Orysa4|Os08g35050.1,Orysa4|Os08g27240.1  
Orysa4|Os08g35010.1  
AT1G02475.1,AT4G01883.1 Orysa4|Os01g22510.1  
AT1G02470.1  
AT4G24830.1 Orysa4|Os12g13320.1  
Orysa4|Os11g19770.1  
AT1G57770.1 Orysa4|Os03g62510.1  
AT2G20360.1 Orysa4|Os02g57180.1  
AT5G10380.1  
Orysa4|Os11g39640.1,Orysa4|Os02g36330.1,Orysa4|Os04g50100.1,Orysa4|Os04g37740.1,Orysa4|Os09  
g29370.1  
AT2G42350.1,AT3G16720.1,AT2G42360.1 Orysa4|Os01g55110.1  
AT1G04360.1,AT5G43420.1 Orysa4|Os02g57460.1  
AT5G58580.1,AT3G62690.1,AT2G47560.1 Orysa4|Os01g20910.1,Orysa4|Os03g28080.1,Orysa4|Os01g11460.1  
AT2G46160.1,AT3G61550.1 Orysa4|Os01g53500.1,Orysa4|Os05g45060.1  
AT3G18930.1 Orysa4|Os12g40460.1  
AT5G66070.2,AT4G35840.1,AT2G17730.1 Orysa4|Os10g39770.1  
AT5G01880.1,AT3G10910.1 Orysa4|Os12g02350.1  
AT1G74410.1 Orysa4|Os02g50990.1,Orysa4|Os06g12560.1  
AT1G49200.1,AT3G18773.1,AT1G49220.1,AT1G49210.1,AT1G49230.1  
Orysa4|Os02g33720.1,Orysa4|Os04g34230.1  
AT2G20030.1,AT4G28890.1 Orysa4|Os05g51780.1  
AT5G06490.1,AT2G35910.1 Orysa4|Os03g57410.1,Orysa4|Os07g06560.1  
AT4G33565.1  
AT2G37580.1  
AT4G17245.1,AT5G47610.1  
AT5G05280.1  
AT5G05810.1  
AT5G41450.1  
Orysa4|Os02g35347.1,Orysa4|Os02g35383.1,Orysa4|Os02g35429.1,Orysa4|Os02g35329.1,Orysa4|Os02  
g35401.1  
Orysa4|Os06g14650.1,Orysa4|Os05g07140.1,Orysa4|Os02g15100.1,Orysa4|Os01g11480.1  
Orysa4|Os06g34880.1  
Orysa4|Os03g05560.1  
Orysa4|Os05g11860.1  
Orysa4|Os03g05570.1  
Orysa4|Os08g44950.1  
Orysa4|Os12g01750.1,Orysa4|Os03g22110.1,Orysa4|Os05g15170.1  
Orysa4|Os11g02260.1,Orysa4|Os12g02220.1  
Orysa4|Os02g45390.1  
Orysa4|Os01g61470.1  
Orysa4|Os06g50370.1,Orysa4|Os08g43670.1  
Orysa4|Os09g37050.1  
Orysa4|Os07g29600.1  
Orysa4|Os05g40020.1  
Orysa4|Os05g36310.1,Orysa4|Os01g64620.1  
Orysa4|Os12g42540.1,Orysa4|Os07g06540.1  
AT3G09350.1 Orysa4|Os03g60780.1  
AT3G53800.1  
AT5G02150.1  
Orysa4|Os03g16460.1  
AT5G62150.1 Orysa4|Os04g48380.1,Orysa4|Os10g38040.1  
AT3G52790.1  
AT4G25433.1

AT2G15130.1,AT2G15220.1 Orysa4|Os10g34910.1,Orysa4|Os10g34920.1  
AT2G15170.1  
Orysa4|Os10g34930.1  
AT4G24720.1,AT5G50200.1 Orysa4|Os02g38230.1  
AT4G23620.1 Orysa4|Os05g18750.1,Orysa4|Os01g41030.1  
AT1G06570.1 Orysa4|Os02g07160.1  
AT1G12600.1,AT4G23010.1 Orysa4|Os03g02670.1  
AT1G14360.1,AT2G02810.1 Orysa4|Os06g39260.1  
AT5G59740.1,AT3G46180.1 Orysa4|Os05g02490.1  
AT5G35525.1,AT1G14880.1,AT1G14870.1 Orysa4|Os02g36940.1,Orysa4|Os02g36950.1  
AT1G68610.1  
AT1G49030.1,AT3G18450.1,AT3G18460.1  
AT1G52200.1  
AT1G68630.1,AT1G58320.1  
Orysa4|Os02g52550.1  
Orysa4|Os06g15590.1,Orysa4|Os03g61470.1,Orysa4|Os03g61500.1,Orysa4|Os03g61480.1  
Orysa4|Os03g61440.1  
Orysa4|Os02g18540.1,Orysa4|Os10g02300.1  
AT1G79470.1,AT1G16350.1 Orysa4|Os03g56800.1  
AT1G73990.1 Orysa4|Os02g49570.1  
AT5G63890.2 Orysa4|Os01g13190.1  
AT3G07260.1,AT3G07220.1 Orysa4|Os08g41710.1  
Orysa4|Os09g32750.1  
Orysa4|Os11g27530.1  
AT4G21110.1 Orysa4|Os05g37390.1,Orysa4|Os04g55290.1,Orysa4|Os01g63890.1  
Orysa4|Os12g05410.1  
AT5G09570.1 Orysa4|Os03g48080.1  
AT5G64400.2  
Orysa4|Os12g44080.1  
AT3G17310.1 Orysa4|Os05g04330.1  
AT5G15380.1,AT5G14620.1 Orysa4|Os12g01800.1,Orysa4|Os03g02010.1  
Orysa4|Os11g01810.1  
AT2G03820.1 Orysa4|Os10g42320.1  
AT2G15620.1 Orysa4|Os02g52730.1,Orysa4|Os01g25484.1  
Orysa4|Os01g25520.1  
AT5G19530.1 Orysa4|Os02g14190.1  
AT1G48950.1 Orysa4|Os01g42080.1  
AT1G17210.1 Orysa4|Os03g57160.1,Orysa4|Os07g05610.1  
AT1G10740.1,AT1G23330.1 Orysa4|Os05g33820.1  
AT5G62980.1,AT3G11750.1 Orysa4|Os06g06100.1,Orysa4|Os08g44210.1,Orysa4|Os09g38759.1  
AT3G21730.1  
ATCG00270.1 Orysa4|Os02g24630.1,Orysa4|Os10g21210.1,Orysa4|Os01g58040.1,Orysa4|Os10g41689.1  
AT1G03160.1 Orysa4|Os05g32390.1  
AT2G40600.1 Orysa4|Os03g21830.1  
Orysa4|Os08g04480.1,Orysa4|Os06g34540.1  
AT1G71220.1 Orysa4|Os02g44510.1  
AT3G19970.1 Orysa4|Os06g51390.1  
Orysa4|Os02g04110.1  
AT5G38000.1,AT5G16970.1,AT5G16990.1,AT3G03080.1,AT5G16960.1,AT5G37940.1,AT5G37980.1,AT5G17000.1,AT1G26320.1 Orysa4|Os04g41960.1  
AT1G65560.1 Orysa4|Os01g66720.1  
AT3G59845.1  
AT5G37960.1,AT5G16980.1  
Orysa4|Os12g12514.1,Orysa4|Os12g12580.1,Orysa4|Os12g12560.1,Orysa4|Os11g14910.1,Orysa4|Os12g12590.1  
Orysa4|Os06g40070.1  
AT4G09550.1,AT1G73790.1 Orysa4|Os03g32150.1,Orysa4|Os03g60900.1  
Orysa4|Os03g32140.1  
AT1G69740.1 Orysa4|Os06g49110.1  
AT1G44318.1  
AT1G74790.1,AT5G62630.1 Orysa4|Os12g44230.1,Orysa4|Os03g48540.1  
AT5G39970.1  
Orysa4|Os07g09520.1  
AT1G66480.1,AT5G37840.1  
Orysa4|Os02g49960.1,Orysa4|Os09g23780.1,Orysa4|Os06g14780.1,Orysa4|Os08g33210.1  
AT1G71015.1,AT2G01340.1  
AT5G40810.1,AT3G27240.1 Orysa4|Os05g23620.1  
AT5G43600.1 Orysa4|Os12g40550.1  
AT3G48110.1 Orysa4|Os06g01400.1  
AT5G13630.1 Orysa4|Os03g20700.1  
Orysa4|Os07g46310.1  
AT4G14100.1,AT3G23760.1 Orysa4|Os03g63380.1,Orysa4|Os07g09150.1  
Orysa4|Os07g09140.1  
Orysa4|Os07g29240.1  
AT5G57580.1,AT2G18750.1,AT4G25800.1 Orysa4|Os02g08120.1,Orysa4|Os02g35470.1,Orysa4|Os04g36660.1  
AT4G31000.1,AT2G24300.2  
Orysa4|Os12g36940.1,Orysa4|Os11g44680.1,Orysa4|Os03g18960.1,Orysa4|Os12g36920.1,Orysa4|Os11g44610.1,Orysa4|Os12g36110.1  
Orysa4|Os11g44700.1,Orysa4|Os12g36910.1  
Orysa4|Os11g44170.1  
Orysa4|Os03g56660.1  
Orysa4|Os03g60890.1,Orysa4|Os03g32160.1

Orysa4|Os08g27170.1,Orysa4|Os01g04280.1,Orysa4|Os09g13890.1  
AT2G34690.1 Orysa4|Os03g57140.1  
AT4G39670.1 Orysa4|Os03g50280.1  
AT3G02910.1 Orysa4|Os03g63700.1  
AT5G46720.1  
Orysa4|Os11g04420.1  
AT1G27350.1,AT1G27330.1 Orysa4|Os12g32950.1  
AT5G07710.1,AT5G61390.1 Orysa4|Os10g26730.1  
AT4G39810.1,AT1G74390.1  
Orysa4|Os10g29090.1  
AT3G13410.1 Orysa4|Os11g03380.1,Orysa4|Os12g03060.1  
AT1G03475.1 Orysa4|Os04g52130.1  
AT4G03205.2  
AT4G37280.1 Orysa4|Os11g34300.1  
AT1G02740.1  
Orysa4|Os04g01130.1  
AT5G19900.1 Orysa4|Os02g58570.1  
Orysa4|Os09g38070.1  
AT4G37980.1,AT4G39330.1,AT4G37990.1  
Orysa4|Os09g23550.1,Orysa4|Os09g23530.1,Orysa4|Os09g23540.1,Orysa4|Os09g23560.1  
AT1G72680.1 Orysa4|Os11g40690.1,Orysa4|Os10g11810.1  
Orysa4|Os04g52280.1,Orysa4|Os08g16910.1  
Orysa4|Os03g12270.1  
Orysa4|Os04g15920.1  
AT4G35080.1,AT2G16800.1 Orysa4|Os06g02580.1  
AT5G25450.1,AT4G32470.1 Orysa4|Os07g10500.1,Orysa4|Os03g59220.1  
AT2G06520.1 Orysa4|Os07g47640.1,Orysa4|Os03g22370.1  
AT5G18420.2 Orysa4|Os12g09610.1,Orysa4|Os11g13694.1  
AT1G54310.2 Orysa4|Os02g07740.1  
AT4G14746.1 Orysa4|Os03g06580.1  
Orysa4|Os10g28380.1,Orysa4|Os10g28400.1  
Orysa4|Os11g37210.1  
ATMG00710.1  
Orysa4|Os03g48550.1,Orysa4|Os11g29330.1,Orysa4|Os11g28370.1,Orysa4|Os08g30360.1,Orysa4|Os08g42500.1,Orysa4|Os08g04970.1,Orysa4|Os06g23240.1,Orysa4|Os10g01440.1,Orysa4|Os11g28590.1,Orysa4|Os02g18120.1,Orysa4|Os12g31920.1,Orysa4|Os02g35680.1,Orysa4|Os01g38740.1  
ATMG00300.1  
AT5G55950.1,AT5G57100.1 Orysa4|Os02g49260.1  
AT5G42420.1,AT1G76670.1,AT1G21070.1 Orysa4|Os07g39280.1  
AT4G39390.1,AT1G34020.1,AT4G09810.1 Orysa4|Os02g40090.1,Orysa4|Os05g12490.1  
Orysa4|Os06g19380.1  
Orysa4|Os12g05780.1,Orysa4|Os12g05830.1  
AT2G18180.1,AT4G36490.1,AT4G39180.1,AT4G34580.1,AT2G21540.1  
Orysa4|Os02g04030.1,Orysa4|Os02g24430.1  
AT4G39170.1,AT2G21520.1 Orysa4|Os02g04020.1  
AT5G47510.1 Orysa4|Os07g27310.1  
AT2G16380.1  
AT1G19650.1,AT1G75370.1  
Orysa4|Os10g03400.1  
Orysa4|Os08g38850.1  
Orysa4|Os01g50616.1  
AT5G01660.1 Orysa4|Os07g35610.1  
Orysa4|Os01g07140.1  
Orysa4|Os05g07220.1  
AT1G51510.1 Orysa4|Os05g04850.1  
Orysa4|Os03g59550.1  
AT1G55140.1,AT3G13740.1 Orysa4|Os11g13420.1,Orysa4|Os05g25400.1  
AT3G02460.1,AT5G15930.1 Orysa4|Os08g31840.1  
AT3G58640.1,AT2G31010.1 Orysa4|Os02g14530.1,Orysa4|Os01g48330.1  
AT2G42640.1  
AT5G36110.1,AT5G36140.1  
Orysa4|Os07g33580.1,Orysa4|Os07g33440.1,Orysa4|Os07g33610.1,Orysa4|Os07g33540.1,Orysa4|Os07g33420.1,Orysa4|Os07g33480.1,Orysa4|Os07g33550.1,Orysa4|Os07g33560.1,Orysa4|Os07g33620.1,Orysa4|Os09g21260.1  
AT5G36130.1  
Orysa4|Os07g30950.1  
AT1G04290.1 Orysa4|Os04g35590.1  
AT2G29590.1 Orysa4|Os02g32200.1  
Orysa4|Os01g65960.1  
AT4G36050.2 Orysa4|Os09g36530.1  
AT5G42390.1 Orysa4|Os06g41990.1  
AT1G07310.1 Orysa4|Os01g63470.1  
AT5G23950.1 Orysa4|Os08g44850.1,Orysa4|Os09g39770.1  
AT4G23800.1,AT4G11080.1 Orysa4|Os02g15810.1  
AT5G07660.1,AT5G61460.1 Orysa4|Os09g03370.1  
AT2G25330.1,AT2G25320.1 Orysa4|Os02g39990.1  
AT4G32350.1 Orysa4|Os06g47250.1,Orysa4|Os02g06430.1  
AT1G79910.1,AT1G52315.1  
AT5G11950.1,AT2G37210.1 Orysa4|Os05g46360.1,Orysa4|Os01g51210.1  
AT2G28305.1 Orysa4|Os04g43840.1,Orysa4|Os02g41770.1  
AT5G26140.1  
AT4G35190.1

AT5G06300.1,AT3G53450.1  
Orysa4|Os03g01880.1,Orysa4|Os10g33900.1  
Orysa4|Os03g49050.1  
Orysa4|Os03g64070.1  
AT4G32190.1 Orysa4|Os02g09340.1  
AT3G16000.1 Orysa4|Os05g08790.1,Orysa4|Os01g08510.1  
AT1G76240.1 Orysa4|Os06g51010.1,Orysa4|Os06g50980.1,Orysa4|Os10g36670.1,Orysa4|Os10g36660.1,Orysa4|Os06  
g51000.1  
AT1G03210.1,AT4G02860.1,AT4G02850.1 Orysa4|Os01g16146.1  
Orysa4|Os03g32040.1  
AT1G49040.1 Orysa4|Os01g39380.1  
AT4G35280.1,AT2G17180.1 Orysa4|Os02g19180.1  
AT2G40650.1 Orysa4|Os09g01630.1  
AT3G50670.1 Orysa4|Os10g02630.1  
AT3G22380.1 Orysa4|Os07g38360.1  
AT3G63180.1  
AT5G65630.1,AT5G10550.1,AT1G17790.1 Orysa4|Os08g09340.1  
AT2G34900.1 Orysa4|Os06g04640.1  
AT1G06230.1 Orysa4|Os02g15220.1  
AT5G14270.1,AT3G27260.1 Orysa4|Os02g38980.1  
AT5G46550.1 Orysa4|Os07g32420.1  
AT3G52280.1  
AT1G73150.1  
AT5G63330.1,AT3G01770.1  
Orysa4|Os01g11580.1  
Orysa4|Os08g03360.1  
AT3G23900.1 Orysa4|Os01g01150.1  
AT3G57150.1 Orysa4|Os03g25450.1,Orysa4|Os07g44190.1  
Orysa4|Os04g48700.1  
Orysa4|Os11g38600.1  
AT5G14780.1 Orysa4|Os06g29180.1,Orysa4|Os06g29220.1  
AT1G25570.1 Orysa4|Os01g04720.1  
AT2G18876.1,AT5G57410.1 Orysa4|Os08g14460.1  
AT3G20970.1,AT1G51390.1 Orysa4|Os05g06330.1  
AT5G66540.1 Orysa4|Os12g04010.1,Orysa4|Os11g04200.1  
AT1G18070.1 Orysa4|Os04g20220.1  
AT5G10630.1 Orysa4|Os04g50870.1,Orysa4|Os01g02720.1  
Orysa4|Os02g25870.1  
Orysa4|Os04g58140.1  
AT5G55710.1 Orysa4|Os02g49470.1  
AT2G47840.1  
AT1G04950.1 Orysa4|Os01g32750.1  
AT1G54360.4  
AT5G27290.1 Orysa4|Os01g28540.1  
AT1G54680.1  
AT3G07370.1 Orysa4|Os08g02140.1  
Orysa4|Os05g01460.1  
AT3G54010.1 Orysa4|Os03g25140.1  
AT1G77800.1 Orysa4|Os02g52960.1  
Orysa4|Os06g10690.1  
AT1G65440.1 Orysa4|Os05g41510.1  
AT1G63210.1  
AT1G61700.1 Orysa4|Os11g08940.1  
AT1G11475.1  
Orysa4|Os12g07980.1  
AT3G46870.1 Orysa4|Os07g36450.1  
AT1G62350.1 Orysa4|Os03g18620.1  
AT2G35720.1 Orysa4|Os10g36370.1  
AT4G26580.1,AT5G55970.1 Orysa4|Os01g50750.1  
AT1G15740.1 Orysa4|Os04g42470.1,Orysa4|Os02g39970.1  
AT1G80400.1,AT4G32600.1 Orysa4|Os01g08340.1,Orysa4|Os02g54624.1,Orysa4|Os05g08610.1  
Orysa4|Os09g15430.1  
AT4G14070.1,AT3G23790.1 Orysa4|Os03g62850.1  
AT2G24580.1 Orysa4|Os12g35890.1,Orysa4|Os01g21380.1  
Orysa4|Os09g32290.1  
AT3G55740.1,AT2G39890.1,AT2G36590.1 Orysa4|Os03g44230.1,Orysa4|Os07g01090.1  
Orysa4|Os01g68050.1  
AT5G23550.1 Orysa4|Os02g35640.1  
AT5G24170.1  
AT1G47670.1 Orysa4|Os12g30040.1  
AT5G41800.1 Orysa4|Os01g43320.1,Orysa4|Os05g50920.1  
AT5G40780.1,AT1G48640.1 Orysa4|Os08g03350.1  
AT1G61270.1,AT3G01760.1  
AT1G67640.1,AT1G24400.1  
AT1G71680.1  
AT1G25530.1  
Orysa4|Os01g63854.1  
Orysa4|Os05g14820.1  
AT1G04510.1,AT2G33340.1 Orysa4|Os10g32880.1  
AT4G03020.1 Orysa4|Os05g05210.1,Orysa4|Os01g28680.1  
Orysa4|Os05g33710.1

AT1G07200.1,AT2G40130.2,AT2G29970.1 Orysa4|Os12g01360.1,Orysa4|Os11g01330.1  
AT5G03570.1,AT2G38460.1 Orysa4|Os06g36450.1  
AT1G13740.1,AT1G69260.1 Orysa4|Os03g30570.1,Orysa4|Os07g41160.1  
AT3G02140.1,AT3G29575.1  
AT3G55040.1 Orysa4|Os03g17470.1,Orysa4|Os03g17480.1  
AT5G02790.1,AT5G02780.1  
Orysa4|Os03g17460.1  
AT1G54350.1 Orysa4|Os01g11946.1  
AT4G09980.1 Orysa4|Os01g16180.1,Orysa4|Os10g31030.1,Orysa4|Os03g05420.1  
AT5G55300.1,AT5G55310.1 Orysa4|Os08g05840.1  
AT3G47730.1,AT5G61730.1,AT5G61690.1 Orysa4|Os08g30740.1  
AT3G47760.1,AT3G47790.1,AT3G47780.1,AT3G47770.1,AT3G47750.1,AT5G61740.1,AT5G61700.1,AT3G47740.1  
Orysa4|Os09g19680.1,Orysa4|Os08g30770.1  
AT2G41700.1  
Orysa4|Os06g38950.1  
Orysa4|Os02g11960.1  
Orysa4|Os02g01820.1  
Orysa4|Os08g30780.1  
AT1G71040.1,AT1G23010.1 Orysa4|Os01g03530.1,Orysa4|Os01g03620.1  
Orysa4|Os01g03640.1,Orysa4|Os01g03630.1  
Orysa4|Os01g03549.1  
AT5G63960.1 Orysa4|Os11g08330.1  
AT4G18930.1,AT4G18940.1 Orysa4|Os05g44170.1  
AT5G16880.1 Orysa4|Os02g46962.1  
Orysa4|Os10g42730.1  
AT2G28670.1,AT1G07730.2 Orysa4|Os01g06250.1,Orysa4|Os03g17220.1  
AT2G39430.1,AT3G55230.1  
Orysa4|Os01g62030.1  
AT1G30460.1 Orysa4|Os06g46400.1  
AT4G11970.1  
AT2G32080.1 Orysa4|Os01g15600.1  
AT2G37550.1,AT3G53710.1 Orysa4|Os03g17020.1  
AT5G18820.1 Orysa4|Os09g38980.1  
AT3G13860.1 Orysa4|Os05g46290.1  
AT3G23990.1 Orysa4|Os10g32550.1,Orysa4|Os03g04970.1  
AT1G55490.1,AT5G56500.2,AT3G13470.1 Orysa4|Os06g02380.1  
AT2G33210.1  
AT1G26230.1  
Orysa4|Os02g01280.1  
AT5G46750.1,AT4G17890.1 Orysa4|Os10g42420.1  
AT2G35210.1  
AT5G23090.1,AT5G08190.1 Orysa4|Os08g29500.1  
AT3G03560.1 Orysa4|Os03g49960.1  
AT5G23490.1,AT5G08440.1 Orysa4|Os05g01060.1  
AT5G23510.1  
AT1G11860.1 Orysa4|Os04g53230.1  
AT4G12130.1 Orysa4|Os06g04380.1  
AT1G80060.1 Orysa4|Os02g09530.1  
AT3G07860.1 Orysa4|Os04g56770.1  
AT5G25340.1  
AT3G07590.1 Orysa4|Os02g37430.1  
AT4G02840.1  
AT5G56000.1,AT5G56030.1,AT5G56010.1 Orysa4|Os08g39140.1,Orysa4|Os09g30438.1  
AT4G24190.1 Orysa4|Os06g50300.1  
AT2G04030.1 Orysa4|Os09g29840.1,Orysa4|Os08g38086.1  
AT3G07770.1 Orysa4|Os12g32986.1  
AT5G52640.1  
Orysa4|Os09g36420.1  
AT4G17570.1,AT5G47140.1 Orysa4|Os04g46020.1  
AT4G32720.1 Orysa4|Os02g39700.1,Orysa4|Os04g42010.1  
AT1G79880.1  
AT4G35890.1,AT5G66100.1 Orysa4|Os03g06070.1  
Orysa4|Os09g36920.1  
Orysa4|Os10g30320.1  
AT3G56570.1 Orysa4|Os01g65730.1  
AT1G76080.1 Orysa4|Os07g29410.1  
AT3G52100.1,AT3G08020.1 Orysa4|Os12g34330.1  
AT1G55760.1 Orysa4|Os08g38700.1  
AT1G23090.1 Orysa4|Os04g55800.1  
AT1G78000.1,AT1G22150.1,AT4G08620.1 Orysa4|Os03g09980.1,Orysa4|Os03g09970.1  
AT5G13550.1,AT3G12520.1 Orysa4|Os09g06499.1  
AT1G77990.1,AT5G10180.1 Orysa4|Os03g09930.1  
AT3G51895.1 Orysa4|Os03g06520.1  
AT3G15990.1 Orysa4|Os06g05160.1  
AT5G19600.1 Orysa4|Os01g41050.1,Orysa4|Os01g52130.1  
AT4G02700.1  
Orysa4|Os08g31410.1  
Orysa4|Os03g09940.1  
Orysa4|Os07g18700.1  
AT2G41370.1,AT3G57130.1 Orysa4|Os01g72020.1  
Orysa4|Os12g04410.1,Orysa4|Os11g04600.1  
AT1G04020.1 Orysa4|Os04g43300.1

Orysa4|Os05g40810.1  
AT4G31300.2 Orysa4|Os02g53060.1,Orysa4|Os06g04800.1  
AT1G78420.1,AT1G17145.1 Orysa4|Os06g06120.1,Orysa4|Os02g14720.1  
AT4G14440.1,AT4G14430.1 Orysa4|Os05g45300.1  
AT1G65520.1  
Orysa4|Os01g10830.1  
AT3G63410.1 Orysa4|Os07g08200.1  
Orysa4|Os12g42090.1  
AT5G10720.1 Orysa4|Os06g44410.1  
AT5G10680.1  
AT4G02570.1 Orysa4|Os01g27150.1,Orysa4|Os05g05700.1  
AT1G26830.1 Orysa4|Os02g51180.1  
AT5G46210.1 Orysa4|Os03g57290.1  
AT1G59790.1  
AT1G59800.1  
AT1G02980.1  
AT1G69670.1  
AT3G46910.1,AT4G12100.1  
Orysa4|Os12g13360.1  
Orysa4|Os01g50980.1,Orysa4|Os01g27160.1  
Orysa4|Os05g10580.1  
Orysa4|Os01g70920.1  
Orysa4|Os04g55030.1,Orysa4|Os08g07400.1  
Orysa4|Os04g55000.1  
AT3G22410.1 Orysa4|Os03g11950.1  
AT1G05370.1  
AT3G01430.1 Orysa4|Os02g50940.1  
AT3G23940.1 Orysa4|Os08g44530.1  
AT4G34090.1 Orysa4|Os03g01920.1  
AT2G23370.1  
AT5G13090.1,AT1G12020.1,AT1G24270.1 Orysa4|Os11g29810.1,Orysa4|Os02g30420.1  
AT1G73920.1,AT1G18460.1 Orysa4|Os01g33784.1  
AT4G11820.2 Orysa4|Os03g02710.1,Orysa4|Os09g34960.1,Orysa4|Os08g43170.1  
AT5G07670.1,AT5G51380.1,AT5G51370.2 Orysa4|Os02g44104.1  
AT4G26790.1,AT2G04570.1,AT2G42990.1 Orysa4|Os06g43044.1,Orysa4|Os02g09620.1  
AT2G40250.1 Orysa4|Os01g61570.1,Orysa4|Os05g39220.1  
AT1G75900.1,AT1G20120.1,AT1G75880.1,AT3G43550.1,AT1G75890.1  
Orysa4|Os10g30290.1,Orysa4|Os09g36880.1  
AT3G50400.1,AT2G23540.1 Orysa4|Os03g19670.1  
AT4G18970.1,AT5G45670.1,AT1G29670.1,AT1G29660.1  
Orysa4|Os01g54470.1,Orysa4|Os01g52770.1,Orysa4|Os05g44200.1  
AT5G33370.1,AT3G04290.1 Orysa4|Os02g40440.1,Orysa4|Os04g42860.1,Orysa4|Os10g32580.1  
AT1G71691.2 Orysa4|Os05g34700.1  
AT5G22810.1,AT3G53100.1,AT5G03810.1,AT5G03820.1 Orysa4|Os03g47940.1  
AT4G10950.1 Orysa4|Os02g18870.1  
AT1G74460.1 Orysa4|Os06g12410.1  
AT5G45950.1 Orysa4|Os02g01980.1  
AT5G03600.1,AT5G03610.1,AT3G09930.1 Orysa4|Os09g39430.1  
AT3G16370.1 Orysa4|Os06g05550.1  
AT5G41890.1 Orysa4|Os04g48800.1  
AT5G55050.1 Orysa4|Os03g38470.1,Orysa4|Os03g38390.1  
AT5G37690.1 Orysa4|Os06g14630.1,Orysa4|Os02g50000.1  
AT5G42170.1,AT1G58725.1  
AT1G20130.1  
AT5G42160.1  
AT4G16220.1,AT4G16230.1  
AT2G04020.1  
AT2G19010.1,AT2G19050.1,AT2G19060.1,AT4G30140.1  
AT1G33811.1  
AT2G03980.1  
AT4G28780.1  
AT5G18430.1  
AT5G15720.1,AT1G71250.1  
Orysa4|Os09g07290.1,Orysa4|Os09g04624.1,Orysa4|Os09g04710.1  
Orysa4|Os02g09610.1  
Orysa4|Os02g26090.1  
Orysa4|Os02g26080.1  
Orysa4|Os03g64170.1,Orysa4|Os02g01140.1  
Orysa4|Os10g05088.1,Orysa4|Os06g24404.1  
Orysa4|Os07g47210.1  
Orysa4|Os08g45150.1  
Orysa4|Os11g42050.1,Orysa4|Os02g57110.1  
Orysa4|Os08g02094.1  
Orysa4|Os02g18954.1  
Orysa4|Os02g18990.1  
Orysa4|Os11g03520.1  
Orysa4|Os04g55660.1  
Orysa4|Os03g38400.1,Orysa4|Os02g44860.1  
Orysa4|Os06g50940.1,Orysa4|Os02g44850.1,Orysa4|Os06g50950.1  
Orysa4|Os03g07070.1,Orysa4|Os01g13680.1  
AT3G10070.1 Orysa4|Os01g63940.1  
AT1G17440.1 Orysa4|Os01g62820.1

AT5G55900.1,AT4G26620.1 Orysa4|Os02g49320.1  
AT3G27570.1,AT5G40510.1  
AT5G07350.1,AT5G61780.1 Orysa4|Os02g32350.1  
Orysa4|Os04g32960.1  
AT2G26890.1 Orysa4|Os10g42439.1  
AT4G29730.1,AT2G19520.1 Orysa4|Os01g51300.1  
AT1G52155.1 Orysa4|Os11g27800.1,Orysa4|Os01g48570.1  
AT5G13640.1 Orysa4|Os09g27210.1  
AT3G44830.1  
AT3G51720.1,AT2G38370.1 Orysa4|Os07g48080.1,Orysa4|Os03g22040.1  
AT3G56270.1,AT2G40480.1  
Orysa4|Os03g11190.1  
Orysa4|Os05g39840.1  
AT1G20900.1,AT1G76500.1 Orysa4|Os02g48320.1,Orysa4|Os06g22100.1  
AT4G17800.1,AT2G35270.1 Orysa4|Os04g50030.1  
AT4G14465.1,AT3G04570.1 Orysa4|Os08g44910.1,Orysa4|Os02g57520.1  
AT1G14490.1,AT5G49700.1 Orysa4|Os09g28930.1  
AT4G35390.1  
Orysa4|Os06g41860.1  
Orysa4|Os08g06320.1  
Orysa4|Os07g13100.1  
AT5G49930.1 Orysa4|Os12g37720.1  
AT4G00270.1,AT3G25950.1,AT5G14280.1,AT3G27270.1 Orysa4|Os05g23700.1  
Orysa4|Os12g13940.1  
AT5G10330.1,AT1G71920.1 Orysa4|Os02g47940.1  
AT2G44150.1,AT3G59960.1 Orysa4|Os09g13740.1  
AT4G30860.1 Orysa4|Os02g39800.1  
AT5G11770.1 Orysa4|Os05g45730.1,Orysa4|Os01g52214.1  
Orysa4|Os03g30610.1  
Orysa4|Os07g02580.1  
AT3G22425.2,AT4G14910.1 Orysa4|Os04g52710.1  
AT5G47455.4,AT4G17310.1 Orysa4|Os02g44100.1  
AT5G11630.1  
Orysa4|Os02g13630.1  
AT3G23710.1 Orysa4|Os07g19030.1  
AT4G33350.1 Orysa4|Os06g11020.1  
AT5G61220.1 Orysa4|Os10g26640.1,Orysa4|Os08g14070.1  
AT3G13960.1 Orysa4|Os02g53690.1  
Orysa4|Os06g02560.1  
AT1G77810.1,AT1G22015.1 Orysa4|Os09g27950.1,Orysa4|Os02g35870.1  
AT4G32120.1,AT2G25300.1 Orysa4|Os06g07905.1,Orysa4|Os06g08005.1  
AT3G14960.1,AT1G53290.1 Orysa4|Os06g06280.1  
AT2G32430.1,AT4G26940.1,AT1G05170.1 Orysa4|Os03g38050.1  
AT5G53340.1 Orysa4|Os08g29710.1  
AT1G33430.1 Orysa4|Os05g35274.1  
AT2G26100.1  
AT1G11730.1  
AT1G32930.1  
Orysa4|Os06g46570.1,Orysa4|Os02g06840.1  
AT5G17660.1 Orysa4|Os01g35170.1  
AT5G54870.1,AT4G27020.1 Orysa4|Os01g58114.1  
AT1G64790.1 Orysa4|Os03g51140.1  
AT3G12970.1,AT1G56020.1,AT1G79060.1 Orysa4|Os06g46250.1,Orysa4|Os02g06960.1  
Orysa4|Os12g41660.1  
Orysa4|Os04g52800.1  
AT4G09650.1 Orysa4|Os02g51470.1  
Orysa4|Os03g52660.1  
AT4G14570.1 Orysa4|Os10g28020.1,Orysa4|Os10g28030.1  
AT3G08630.1,AT3G08640.1 Orysa4|Os01g59740.1  
AT4G32020.1,AT2G25250.1 Orysa4|Os02g55430.1  
AT3G21570.1 Orysa4|Os01g28790.1  
Orysa4|Os05g33580.1  
AT2G30920.1 Orysa4|Os06g05900.1  
Orysa4|Os06g05910.1  
AT2G33540.1 Orysa4|Os11g31890.1  
AT3G04930.1,AT5G28040.1 Orysa4|Os01g14720.1,Orysa4|Os03g25430.1,Orysa4|Os07g44200.1  
Orysa4|Os01g14750.1  
Orysa4|Os03g50110.1  
AT2G18040.1 Orysa4|Os04g02830.1  
Orysa4|Os04g56800.1  
AT2G15560.1 Orysa4|Os08g13390.1  
AT2G24060.1,AT4G30690.1 Orysa4|Os02g55120.1  
AT5G51290.1 Orysa4|Os02g43906.1  
Orysa4|Os02g43912.1  
AT3G08740.1 Orysa4|Os11g02450.1,Orysa4|Os12g02380.1  
AT1G72590.1,AT2G16530.1 Orysa4|Os04g48750.1  
AT3G43840.1  
AT5G16010.1 Orysa4|Os07g06800.1  
AT5G58720.1 Orysa4|Os01g12530.1  
AT3G15390.1 Orysa4|Os02g42670.1  
AT3G06730.1 Orysa4|Os08g29110.1  
AT1G50320.1 Orysa4|Os04g57930.1

AT4G03520.1,AT3G15360.1 Orysa4|Os04g44830.1,Orysa4|Os02g42700.1  
AT1G43560.1  
AT1G76760.1  
AT4G12170.1  
AT1G03680.1  
AT2G15570.1  
Orysa4|Os12g08730.1  
AT4G21660.1 Orysa4|Os02g58090.1  
AT1G11520.1  
AT5G42620.1 Orysa4|Os03g52150.1  
AT3G21720.1 Orysa4|Os07g34520.1  
AT2G27460.1 Orysa4|Os05g37120.1  
Orysa4|Os04g33690.1  
AT3G58660.1,AT1G06380.1,AT2G42650.1 Orysa4|Os05g48422.1  
Orysa4|Os04g42200.1  
AT4G11570.1 Orysa4|Os09g39560.1  
Orysa4|Os04g47020.1  
AT2G18740.1,AT4G30330.1 Orysa4|Os08g05530.1  
Orysa4|Os02g03440.1  
AT1G12250.1 Orysa4|Os02g42960.1  
AT3G14160.1 Orysa4|Os03g60190.1  
AT5G01780.1  
AT3G14140.1  
AT1G15020.2,AT2G01270.1 Orysa4|Os05g47930.1  
AT1G63980.1 Orysa4|Os03g03390.1  
AT1G17080.1 Orysa4|Os05g49020.1,Orysa4|Os01g47680.1  
AT1G29970.1,AT1G53560.1  
Orysa4|Os01g14070.1  
AT3G22840.1,AT4G14690.1  
Orysa4|Os01g14410.1,Orysa4|Os02g16560.1,Orysa4|Os07g08160.1,Orysa4|Os07g08150.1,Orysa4|Os03  
g30400.1  
AT2G26990.1 Orysa4|Os01g17180.1  
AT1G05900.2,AT2G31450.1 Orysa4|Os11g16580.1  
AT3G21300.1 Orysa4|Os01g09750.1  
AT5G16050.1,AT3G02520.1 Orysa4|Os04g38870.1,Orysa4|Os02g36974.1,Orysa4|Os08g33370.1  
AT1G78300.1,AT1G35160.1,AT4G09000.1  
AT1G22300.1  
AT5G38480.1  
AT5G65430.1,AT5G10450.1  
AT1G78220.1  
AT1G22290.1  
AT2G10450.1  
Orysa4|Os11g34450.1,Orysa4|Os03g50290.1  
AT5G44320.1,AT4G20980.1 Orysa4|Os05g49150.1  
AT2G33800.1 Orysa4|Os03g34040.1  
AT1G23110.1,AT1G70900.1 Orysa4|Os08g33640.1  
Orysa4|Os09g24510.1  
AT4G39790.1 Orysa4|Os05g16640.1,Orysa4|Os05g07980.1  
AT2G27090.1  
Orysa4|Os09g20340.1  
AT1G09760.1 Orysa4|Os02g13990.1  
AT1G09280.1 Orysa4|Os12g37630.1  
AT3G20560.1,AT4G27080.1 Orysa4|Os07g34030.1  
AT1G50950.1  
AT3G60420.1,AT3G60430.1,AT3G60450.1,AT3G60440.1 Orysa4|Os03g01180.1  
AT3G47380.1,AT1G62760.1,AT4G12390.1,AT4G25260.1,AT5G62350.1,AT1G62770.1  
Orysa4|Os04g01570.1,Orysa4|Os06g49760.1  
AT1G70720.1,AT2G01610.1,AT5G20740.1,AT1G14890.1,AT1G23205.1  
AT5G62340.1  
AT3G62820.1  
AT4G00080.1  
Orysa4|Os08g24160.1  
Orysa4|Os03g40900.1,Orysa4|Os10g10700.1  
AT1G23760.1,AT1G70370.1,AT1G60390.1 Orysa4|Os08g29200.1,Orysa4|Os09g16010.1  
Orysa4|Os10g26940.1  
AT3G57560.1 Orysa4|Os02g44000.1,Orysa4|Os04g46460.1  
AT1G33980.1 Orysa4|Os04g35920.1  
AT1G21170.1,AT1G76850.1 Orysa4|Os04g34450.1  
AT5G47490.1,AT5G47480.1 Orysa4|Os02g01490.1  
Orysa4|Os06g01650.1  
ATCG00780.1 Orysa4|Os01g57950.1  
AT1G17560.1,AT5G46160.1 Orysa4|Os12g42180.1  
AT3G12955.1 Orysa4|Os09g26590.1,Orysa4|Os12g41600.1  
AT5G20820.1 Orysa4|Os08g35110.1  
AT1G17345.1,AT1G72430.1  
AT3G12360.1 Orysa4|Os03g17240.1  
AT1G05640.1,AT2G31820.1 Orysa4|Os09g34280.1,Orysa4|Os08g42960.1  
AT2G01680.1 Orysa4|Os02g50270.1  
AT1G07710.1,AT5G60070.1 Orysa4|Os03g17250.1  
AT5G54700.1  
AT3G09550.1  
AT1G34050.1,AT5G54710.1,AT5G50140.1



AT1G10340.1,AT2G24600.3  
AT5G02620.1  
Orysa4|Os01g61990.1  
AT1G09300.1 Orysa4|Os12g37640.1  
AT3G51800.2 Orysa4|Os05g28280.1  
AT3G03710.1 Orysa4|Os07g07310.1  
AT5G14580.1  
AT3G04720.1 Orysa4|Os11g37950.1,Orysa4|Os11g37970.1,Orysa4|Os11g37940.1  
Orysa4|Os11g37930.1  
AT1G08490.1 Orysa4|Os12g18900.1  
AT3G10730.1,AT5G04990.1 Orysa4|Os05g18770.1  
Orysa4|Os01g16220.1  
AT1G14520.1 Orysa4|Os06g36560.1  
AT2G19800.1,AT4G26260.1,AT5G56640.1  
AT4G23630.1,AT5G41600.1,AT4G11220.1 Orysa4|Os05g45050.1,Orysa4|Os01g53520.1,Orysa4|Os01g12650.1  
AT3G54120.1 Orysa4|Os04g29920.1  
AT3G10260.3 Orysa4|Os07g04910.1,Orysa4|Os03g56900.1  
AT3G18260.1 Orysa4|Os01g04640.1,Orysa4|Os05g47690.1  
AT2G15280.1,AT3G19460.1 Orysa4|Os04g57420.1  
AT3G10915.3 Orysa4|Os03g21840.1  
AT1G64090.1  
AT4G01230.1,AT2G46170.1  
AT2G23640.1  
AT3G61560.2  
AT1G68230.1  
Orysa4|Os05g24770.1  
Orysa4|Os02g16620.1,Orysa4|Os06g30750.1  
Orysa4|Os01g63240.1  
AT3G27250.1,AT5G50360.1,AT5G63350.1,AT5G40790.1,AT3G48510.1,AT5G40800.1 Orysa4|Os12g13910.1  
AT5G10920.1 Orysa4|Os03g19280.1  
AT3G27320.1,AT5G14310.1 Orysa4|Os01g67600.1  
Orysa4|Os12g15400.1  
AT3G21710.2 Orysa4|Os07g34020.1  
AT3G25480.1 Orysa4|Os01g66600.1  
AT4G01050.1 Orysa4|Os02g15750.1  
AT1G74560.2,AT1G18800.1 Orysa4|Os02g36710.1  
AT3G50800.1,AT5G66580.1,AT2G23690.1,AT4G37240.1 Orysa4|Os03g52940.1,Orysa4|Os07g03120.1  
AT5G21990.1 Orysa4|Os07g06710.1  
Orysa4|Os04g35690.1  
AT4G22740.1 Orysa4|Os06g04390.1,Orysa4|Os08g02460.1  
AT2G45380.1  
AT5G57070.1,AT5G06640.1,AT1G21310.1,AT1G61080.1,AT4G08400.1,AT1G72790.1,AT4G08370.1,AT5G35190.1,AT4G13390.1,AT4G13340.1,AT4G33970.1,AT4G08410.1,AT5G59170.1,AT3G28550.1,AT3G54590.1  
Orysa4|Os05g02630.1,Orysa4|Os07g23660.1,Orysa4|Os07g23640.1,Orysa4|Os05g13940.1,Orysa4|Os06g07220.1,Orysa4|Os01g41120.1,Orysa4|Os01g08470.1,Orysa4|Os05g13900.1,Orysa4|Os11g06150.1,Orysa4|Os03g54050.1,Orysa4|Os01g40190.1,Orysa4|Os11g43640.1,Orysa4|Os02g04540.1,Orysa4|Os11g05870.1,Orysa4|Os01g25460.1  
AT4G06744.1 Orysa4|Os04g57430.1,Orysa4|Os04g42620.1  
AT5G15780.1,AT4G38770.1,AT2G27380.1,AT2G15880.1 Orysa4|Os10g13850.1  
AT1G12810.1 Orysa4|Os08g42450.1  
AT5G06630.1,AT2G24980.1,AT4G15160.1,AT3G22800.1,AT1G49490.1,AT1G12040.1,AT4G08380.1,AT3G54580.1,AT1G23720.1,AT3G19020.1,AT4G18670.1,AT1G62440.1,AT1G26250.1,AT5G49080.1,AT1G26240.1  
AT3G24480.1  
AT3G22070.1  
AT4G28380.1  
AT1G23040.1,AT1G02405.1,AT1G70990.1  
AT3G50580.1,AT2G43150.1,AT3G20850.1  
AT3G19070.1  
AT5G55750.1  
AT5G25550.1  
AT4G00890.1  
AT1G49750.1,AT3G19320.1  
AT2G33520.1  
Orysa4|Os11g33030.1  
Orysa4|Os05g29870.1  
Orysa4|Os01g02150.1,Orysa4|Os11g02010.1,Orysa4|Os07g40900.1  
Orysa4|Os09g13770.1  
Orysa4|Os06g21120.1  
Orysa4|Os12g35710.1  
AT5G57990.1 Orysa4|Os06g08530.1  
AT5G46740.1,AT4G17895.1 Orysa4|Os02g46650.1  
AT1G17110.1 Orysa4|Os02g14730.1  
AT4G30890.1 Orysa4|Os07g46660.1  
AT5G65450.1 Orysa4|Os08g37350.1,Orysa4|Os09g28940.1  
AT3G14400.1 Orysa4|Os05g43480.1  
AT4G24560.1  
Orysa4|Os02g55180.1  
AT1G16560.1 Orysa4|Os05g13330.1  
AT5G62130.1  
Orysa4|Os10g38030.1  
AT4G08550.1 Orysa4|Os06g12030.1  
AT3G11920.1 Orysa4|Os10g34170.1

AT5G58180.1,AT5G58060.1 Orysa4|Os01g64650.1,Orysa4|Os01g73300.1  
AT1G45207.2 Orysa4|Os08g36760.1,Orysa4|Os02g52810.1,Orysa4|Os09g28300.1  
AT4G36970.1  
AT3G60090.1,AT2G42140.1,AT2G44340.1,AT3G58000.1 Orysa4|Os06g41450.1  
Orysa4|Os04g57030.1  
AT2G21530.1 Orysa4|Os12g03070.1,Orysa4|Os11g03390.1  
AT2G39800.1,AT3G55610.1 Orysa4|Os01g62900.1,Orysa4|Os05g38150.1  
AT3G03190.1,AT5G17220.1 Orysa4|Os03g04240.1,Orysa4|Os03g04260.1,Orysa4|Os03g04250.1  
AT3G62760.1  
Orysa4|Os01g27380.1,Orysa4|Os01g27480.1,Orysa4|Os01g27360.1,Orysa4|Os01g27340.1,Orysa4|Os01  
g55830.1,Orysa4|Os01g27260.1,Orysa4|Os01g27210.1  
AT2G30870.1,AT2G30860.1  
AT2G02930.1,AT4G02520.1,AT1G02920.1,AT1G02930.1  
Orysa4|Os10g39740.1,Orysa4|Os03g04220.1  
Orysa4|Os01g25100.1  
Orysa4|Os01g70770.1  
Orysa4|Os01g27300.1  
AT2G20585.1 Orysa4|Os01g55020.1,Orysa4|Os01g13720.1  
AT1G28395.1  
AT2G37660.1 Orysa4|Os05g01970.1  
Orysa4|Os03g60740.1  
AT5G19500.1 Orysa4|Os07g46780.1  
Orysa4|Os03g14910.1  
AT4G40042.1,AT2G22425.1 Orysa4|Os12g25210.1  
AT3G45590.1,AT5G60230.2 Orysa4|Os06g33980.1,Orysa4|Os11g38930.1  
AT3G45577.1  
AT1G13770.1 Orysa4|Os03g11500.1  
AT3G45890.1 Orysa4|Os04g22360.1  
AT1G53580.1 Orysa4|Os01g47690.1  
AT2G26200.1 Orysa4|Os03g04940.1  
AT4G21705.1 Orysa4|Os07g40750.1  
AT5G09450.1 Orysa4|Os04g37720.1  
AT2G20710.1 Orysa4|Os10g35730.1,Orysa4|Os10g35750.1,Orysa4|Os10g35760.1  
AT1G60770.1 Orysa4|Os04g25410.1  
AT1G02370.1,AT4G01990.1 Orysa4|Os01g19490.1,Orysa4|Os01g19529.1,Orysa4|Os01g19548.1  
AT1G02150.1 Orysa4|Os04g46010.1  
AT5G27460.1 Orysa4|Os02g55310.1  
AT3G11380.1,AT1G28000.1,AT1G28020.1  
AT3G11350.1,AT1G43010.1  
AT2G20720.1  
AT3G05550.1,AT5G27760.1 Orysa4|Os02g37930.1,Orysa4|Os07g47670.1  
AT5G63300.1,AT3G27160.1 Orysa4|Os02g09590.1  
AT2G45200.1 Orysa4|Os02g03450.1  
AT3G44890.1 Orysa4|Os02g57670.1  
AT4G36480.1 Orysa4|Os03g14800.1,Orysa4|Os02g56300.1,Orysa4|Os10g11200.1  
AT1G17130.1 Orysa4|Os01g40610.1  
AT3G43250.1,AT2G32050.1  
Orysa4|Os01g40600.1  
AT3G62580.1 Orysa4|Os11g44940.1,Orysa4|Os12g37060.1  
Orysa4|Os12g37070.1  
AT1G20340.1,AT1G76100.1 Orysa4|Os06g01210.1  
AT4G13270.1 Orysa4|Os03g48950.1  
AT1G52330.1  
Orysa4|Os07g10610.1  
AT3G05545.1 Orysa4|Os05g06270.1,Orysa4|Os01g24880.1  
AT2G15260.1  
AT2G47700.1  
Orysa4|Os08g42640.1  
AT5G10310.1 Orysa4|Os02g51950.1  
AT4G37810.1 Orysa4|Os07g04020.1,Orysa4|Os03g46930.1  
Orysa4|Os08g37890.1  
AT5G50100.1 Orysa4|Os04g57310.1  
AT3G49560.1,AT5G24650.1 Orysa4|Os04g33220.1  
Orysa4|Os02g32530.1  
AT2G18710.1 Orysa4|Os08g15460.1  
AT1G61050.1,AT5G01250.1 Orysa4|Os04g44740.1  
AT3G09020.1,AT2G38150.1  
AT3G25585.1,AT1G13560.1 Orysa4|Os02g02750.1  
AT4G37630.1 Orysa4|Os12g39830.1,Orysa4|Os03g42070.1,Orysa4|Os03g10650.1  
AT1G70210.1 Orysa4|Os09g21450.1,Orysa4|Os08g32540.1  
AT5G65420.1,AT5G10440.1,AT2G22490.1 Orysa4|Os08g37390.1,Orysa4|Os07g42860.1,Orysa4|Os09g29100.1  
AT3G50070.1,AT5G67260.1,AT4G34160.1  
AT4G03270.1  
Orysa4|Os11g47950.1  
Orysa4|Os06g12980.1  
Orysa4|Os06g11410.1  
Orysa4|Os03g27420.1  
AT4G17610.1 Orysa4|Os03g01110.1  
Orysa4|Os10g05290.1  
AT5G20100.1 Orysa4|Os01g50870.1,Orysa4|Os05g46500.1  
AT1G15400.1  
AT4G00860.1,AT1G01170.1 Orysa4|Os11g06240.1,Orysa4|Os06g02420.1,Orysa4|Os06g02470.1

Orysa4|Os04g41980.1  
AT3G02790.1,AT5G16470.1 Orysa4|Os06g49490.1  
AT2G02740.1,AT1G14410.1 Orysa4|Os06g05350.1  
AT1G71260.1 Orysa4|Os02g06370.1  
AT3G02200.2,AT5G15610.1 Orysa4|Os04g01290.1  
AT5G45620.1,AT4G19006.1 Orysa4|Os03g11570.1,Orysa4|Os01g32800.1  
AT1G69526.2,AT1G69523.1 Orysa4|Os02g51030.1  
AT1G69520.1  
AT2G35630.1 Orysa4|Os01g60040.1  
AT3G28155.1  
Orysa4|Os01g60050.1  
AT2G41540.1 Orysa4|Os01g58740.1,Orysa4|Os01g71280.1  
AT3G07690.1  
Orysa4|Os05g41590.1  
AT2G40690.1 Orysa4|Os07g12640.1  
AT1G74220.1 Orysa4|Os07g20270.1  
AT2G03630.1  
AT2G38840.1 Orysa4|Os07g08400.1,Orysa4|Os03g58240.1  
AT1G51560.1,AT3G21140.1 Orysa4|Os02g05500.1,Orysa4|Os08g40570.1  
AT5G03880.1 Orysa4|Os08g44400.1  
AT4G10000.1  
AT1G80230.1,AT3G15640.1 Orysa4|Os06g05080.1,Orysa4|Os01g42650.1  
AT1G52710.1  
AT5G09960.1,AT5G64850.1 Orysa4|Os10g26540.1,Orysa4|Os03g07380.1  
AT5G19473.1  
Orysa4|Os11g39010.1  
AT4G22010.1 Orysa4|Os06g46500.1  
AT1G55560.1,AT1G55570.1,AT3G13390.1,AT3G13400.1 Orysa4|Os01g60080.1,Orysa4|Os05g40740.1  
AT5G66920.1 Orysa4|Os07g02810.1  
AT4G12420.1 Orysa4|Os06g01490.1  
AT1G21860.1,AT1G76160.1,AT4G38420.1  
AT4G28090.1  
AT4G37160.1,AT2G23630.1  
AT5G51480.1,AT4G25240.1  
Orysa4|Os07g02840.1  
Orysa4|Os10g36390.1  
Orysa4|Os01g01030.1  
Orysa4|Os08g05820.1  
AT1G07370.1,AT2G29570.1 Orysa4|Os02g56130.1  
AT4G11800.1,AT4G23000.1 Orysa4|Os07g01540.1  
Orysa4|Os07g04760.1,Orysa4|Os07g04210.1  
AT5G53750.1,AT4G27460.1 Orysa4|Os10g35630.1  
Orysa4|Os04g58310.1  
AT1G75510.1 Orysa4|Os01g56550.1,Orysa4|Os05g43450.1  
AT3G52270.1  
AT5G15400.1 Orysa4|Os03g31400.1  
Orysa4|Os12g36710.1  
AT4G29190.1,AT2G19810.1 Orysa4|Os01g09620.1,Orysa4|Os05g10670.1  
AT2G41900.1 Orysa4|Os03g49170.1  
AT5G44260.1,AT1G03790.1  
AT2G25900.1  
AT2G40140.1,AT5G58620.1  
AT5G12850.1  
AT5G07500.1  
Orysa4|Os01g53650.1,Orysa4|Os05g45020.1  
Orysa4|Os04g41060.1  
Orysa4|Os10g32800.1,Orysa4|Os12g33090.1  
Orysa4|Os07g38090.1  
AT1G67140.1 Orysa4|Os06g30894.1  
AT3G55030.1,AT2G39290.1 Orysa4|Os03g17520.1  
AT5G05470.1,AT2G40290.1 Orysa4|Os07g49220.1,Orysa4|Os03g18510.1  
AT1G71230.1,AT1G22920.1 Orysa4|Os04g56070.1  
AT3G47390.1 Orysa4|Os02g27340.1  
AT3G61870.1 Orysa4|Os02g03010.1  
AT3G55260.1 Orysa4|Os05g02510.1  
AT1G65590.1 Orysa4|Os01g66700.1,Orysa4|Os05g34320.1  
AT5G02030.1 Orysa4|Os01g62920.1,Orysa4|Os05g38120.1  
AT4G34610.1,AT2G16400.1 Orysa4|Os03g47740.1,Orysa4|Os12g43950.1,Orysa4|Os03g06930.1  
AT5G41410.1 Orysa4|Os10g39030.1,Orysa4|Os06g01934.1  
AT4G32980.1 Orysa4|Os02g13310.1,Orysa4|Os06g36680.1  
AT4G36870.1,AT2G23760.1 Orysa4|Os03g52239.1  
AT2G35940.1 Orysa4|Os12g06340.1,Orysa4|Os11g06020.1  
AT2G27990.1  
AT1G75410.1,AT1G19700.1  
AT1G75430.1  
AT2G27220.1  
Orysa4|Os03g47730.1  
Orysa4|Os03g03260.1  
AT1G32060.1 Orysa4|Os02g47020.1  
AT4G17070.1 Orysa4|Os03g01090.1  
AT5G27430.1,AT3G05230.1 Orysa4|Os09g38370.1  
Orysa4|Os01g04030.1

AT1G51450.1 Orysa4|Os12g04930.1,Orysa4|Os11g04930.1  
Orysa4|Os11g04890.1  
AT1G25260.1 Orysa4|Os11g01420.1,Orysa4|Os12g01430.1  
AT1G21065.1 Orysa4|Os02g09460.1,Orysa4|Os06g43140.1  
AT1G08280.1 Orysa4|Os01g63970.1,Orysa4|Os04g42760.1,Orysa4|Os12g05550.1  
AT4G16265.1,AT3G16980.1 Orysa4|Os12g37370.1  
Orysa4|Os03g01230.1  
AT2G29990.1,AT1G07180.1 Orysa4|Os01g61410.1  
Orysa4|Os05g02380.1  
AT1G80620.1,AT1G15810.1 Orysa4|Os02g55940.1,Orysa4|Os06g07996.1,Orysa4|Os06g07896.1  
AT2G44180.1,AT3G59990.1 Orysa4|Os12g43370.1,Orysa4|Os08g42910.1  
AT3G01060.1 Orysa4|Os05g43650.1  
AT5G64150.1 Orysa4|Os12g41830.1  
AT5G22350.1 Orysa4|Os02g33230.1  
AT5G06180.1  
Orysa4|Os04g33770.1  
AT1G36980.1 Orysa4|Os09g27960.1,Orysa4|Os02g35880.1  
Orysa4|Os08g36550.1  
AT1G14810.1 Orysa4|Os03g55280.1  
AT3G57280.1 Orysa4|Os04g39450.1,Orysa4|Os06g19690.1  
AT5G25260.1,AT5G25250.1,AT5G64870.1 Orysa4|Os10g34040.1  
Orysa4|Os10g34130.1,Orysa4|Os10g34150.1  
AT4G26410.1 Orysa4|Os03g20860.1  
AT2G45060.1 Orysa4|Os02g01450.1  
AT2G16460.1 Orysa4|Os06g49890.1  
AT3G51090.1  
AT1G02140.1 Orysa4|Os12g18880.1,Orysa4|Os08g01660.1  
AT1G27520.1 Orysa4|Os02g50780.1  
AT5G43710.1 Orysa4|Os01g56670.1  
AT5G45380.1 Orysa4|Os10g42960.1  
AT1G09620.1 Orysa4|Os09g21110.1,Orysa4|Os09g32650.1  
Orysa4|Os05g15150.1  
AT5G22020.1,AT1G08470.1 Orysa4|Os03g53950.1  
AT3G57030.1,AT3G57010.1  
AT3G57020.1,AT2G41300.1  
Orysa4|Os06g35950.1,Orysa4|Os04g59300.1  
AT1G75210.1 Orysa4|Os03g56310.1  
Orysa4|Os12g08000.1  
AT2G30700.1 Orysa4|Os10g38980.1  
AT2G42230.2,AT3G57890.1 Orysa4|Os06g41110.1,Orysa4|Os02g10130.1  
AT4G37120.1,AT1G65660.1 Orysa4|Os08g03390.1  
AT3G45950.1  
AT2G33040.1 Orysa4|Os10g17280.1  
AT3G12300.1 Orysa4|Os09g33570.1  
AT2G47820.1 Orysa4|Os03g22560.1,Orysa4|Os07g38080.1  
AT1G09040.1,AT1G09050.1,AT1G55050.1  
AT3G11500.1,AT2G23930.1 Orysa4|Os03g29740.1,Orysa4|Os07g41790.1  
AT5G57020.1 Orysa4|Os01g51170.1  
AT2G44175.1  
AT3G10860.1,AT5G05370.1 Orysa4|Os06g07869.1,Orysa4|Os06g07969.1  
AT4G30260.1,AT2G18840.1 Orysa4|Os01g64760.1  
AT2G27200.1,AT1G08410.1 Orysa4|Os12g42370.1,Orysa4|Os03g44530.1  
AT2G25110.1 Orysa4|Os08g34190.1,Orysa4|Os08g17680.1  
AT1G12050.1 Orysa4|Os02g10310.1  
AT5G64050.1 Orysa4|Os02g02860.1  
AT5G27640.2,AT5G25780.1 Orysa4|Os10g41960.1  
AT1G49015.1  
AT4G13970.1 Orysa4|Os07g12520.1  
AT1G60560.1 Orysa4|Os09g13880.1  
AT1G31330.1 Orysa4|Os03g56670.1  
AT3G53690.1 Orysa4|Os09g25260.1,Orysa4|Os09g25200.1,Orysa4|Os09g25190.1,Orysa4|Os09g25220.1  
Orysa4|Os09g11170.1,Orysa4|Os08g35060.1  
Orysa4|Os09g26470.1  
Orysa4|Os11g19500.1  
AT5G55140.1 Orysa4|Os06g23210.1  
AT4G37210.1 Orysa4|Os07g03070.1  
AT5G23330.1,AT5G08340.1 Orysa4|Os03g58710.1  
AT4G12700.1,AT2G04280.1 Orysa4|Os10g31810.1  
AT4G08810.1 Orysa4|Os07g43990.1  
Orysa4|Os01g59070.1  
AT5G64760.1,AT5G09900.1 Orysa4|Os03g63430.1  
AT5G25754.1,AT5G25757.1 Orysa4|Os05g13950.1,Orysa4|Os01g12870.1  
AT3G09960.1,AT3G09970.1 Orysa4|Os04g33470.1  
AT5G58510.1 Orysa4|Os03g18440.1  
AT5G17520.1 Orysa4|Os04g51330.1  
AT4G12980.1,AT3G25290.1 Orysa4|Os08g41280.1,Orysa4|Os09g32470.1  
AT3G07390.1 Orysa4|Os08g41290.1  
AT2G04850.1 Orysa4|Os03g09850.1  
AT3G07570.1 Orysa4|Os04g41810.1,Orysa4|Os01g67030.1  
AT3G61750.1 Orysa4|Os01g48850.1  
AT4G17280.1  
Orysa4|Os03g09900.1

Orysa4|Os01g66900.1  
AT3G20260.1 Orysa4|Os08g40820.1  
AT1G73850.1 Orysa4|Os01g03870.1  
AT3G25920.1 Orysa4|Os03g12020.1  
AT1G52500.2 Orysa4|Os08g21330.1  
Orysa4|Os06g43610.1  
AT1G69390.1 Orysa4|Os12g31450.1  
AT5G67590.1 Orysa4|Os07g39710.1  
AT1G21720.1,AT1G77440.1 Orysa4|Os02g08520.1  
AT1G02120.1 Orysa4|Os07g30940.1  
AT4G10310.1 Orysa4|Os04g51820.1,Orysa4|Os02g07830.1  
Orysa4|Os06g48810.1,Orysa4|Os06g48800.1,Orysa4|Os01g20160.1  
Orysa4|Os04g51830.1  
AT1G02090.1 Orysa4|Os07g30840.1  
AT2G47750.1 Orysa4|Os07g47490.1  
AT2G23170.1,AT4G37390.1,AT1G59500.1,AT2G14960.1 Orysa4|Os07g40290.1  
AT2G46370.1 Orysa4|Os05g50890.1  
AT5G54510.1,AT4G27260.1 Orysa4|Os05g42150.1,Orysa4|Os01g57610.1  
AT5G13320.1,AT1G28130.1,AT1G23160.1,AT1G48670.1,AT5G51470.1,AT1G48660.1  
AT5G13360.1,AT5G13370.1,AT5G13380.1,AT5G13350.1  
AT1G48690.1  
AT4G03400.1  
Orysa4|Os07g38890.1  
Orysa4|Os07g38860.1  
Orysa4|Os05g05180.1  
Orysa4|Os01g12160.1,Orysa4|Os11g08340.1  
AT3G59910.1,AT2G44090.1 Orysa4|Os11g14180.1  
Orysa4|Os02g35480.1  
AT4G32590.3 Orysa4|Os05g48160.1  
AT3G16250.1 Orysa4|Os07g30670.1  
AT5G17990.1 Orysa4|Os03g03450.1  
AT5G62290.1 Orysa4|Os03g14520.1,Orysa4|Os10g08879.1  
AT3G44280.1,AT5G22280.1 Orysa4|Os03g62030.1,Orysa4|Os07g14650.1  
Orysa4|Os02g33290.1  
AT4G38690.1 Orysa4|Os09g36520.1  
AT4G34930.1,AT4G34920.1  
AT2G16190.1,AT1G49330.1 Orysa4|Os05g47580.1,Orysa4|Os05g47620.1,Orysa4|Os12g13400.1  
AT1G50480.1 Orysa4|Os09g27420.1  
AT2G12200.1,AT2G12280.1  
AT3G22640.1 Orysa4|Os03g46100.1,Orysa4|Os03g57960.1  
AT2G38060.1 Orysa4|Os05g37820.1  
AT5G44370.1 Orysa4|Os12g07970.1,Orysa4|Os11g08370.1  
AT4G00370.1 Orysa4|Os09g39680.1  
AT2G29650.1 Orysa4|Os01g17240.1  
AT3G46980.3 Orysa4|Os01g63290.1  
AT1G63050.1,AT1G12640.1 Orysa4|Os02g45344.1  
AT3G56940.1 Orysa4|Os01g17170.1  
AT3G42050.1 Orysa4|Os07g36480.1  
Orysa4|Os07g36470.1  
AT1G54250.1,AT3G59600.1 Orysa4|Os06g48230.1  
AT3G01790.1 Orysa4|Os05g15370.1  
Orysa4|Os05g15360.1  
Orysa4|Os01g67200.1  
AT4G38570.1,AT1G68000.1 Orysa4|Os02g03110.1  
Orysa4|Os06g29650.1  
AT5G48440.1 Orysa4|Os09g33900.1  
AT1G60690.1,AT1G60710.1,AT1G60730.1,AT1G60680.1,AT1G10810.1  
Orysa4|Os04g26870.1,Orysa4|Os04g27060.1,Orysa4|Os04g26910.1  
Orysa4|Os04g26900.1  
Orysa4|Os04g26890.1,Orysa4|Os04g26920.1  
Orysa4|Os04g27300.1  
Orysa4|Os10g28320.1,Orysa4|Os01g43090.1  
AT2G42310.1,AT3G57785.1 Orysa4|Os09g31260.1,Orysa4|Os08g39480.1  
Orysa4|Os03g47380.1  
AT1G67080.1 Orysa4|Os01g03750.1  
AT4G13720.1 Orysa4|Os10g31940.1  
AT2G04530.1 Orysa4|Os09g30466.1  
AT1G74700.1 Orysa4|Os02g12290.1  
AT5G47030.1 Orysa4|Os07g31300.1  
AT1G52370.1,AT4G28360.1 Orysa4|Os01g42980.1  
ATCG00810.1  
AT1G15110.1 Orysa4|Os05g48060.1  
Orysa4|Os01g49020.1  
AT4G25550.1 Orysa4|Os04g58640.1  
AT5G14800.1 Orysa4|Os01g71990.1  
AT1G58030.1,AT5G36940.1 Orysa4|Os03g45170.1,Orysa4|Os12g42850.1  
AT2G34960.1 Orysa4|Os01g11160.1  
AT4G21120.1 Orysa4|Os12g41890.1  
AT1G17120.1 Orysa4|Os06g34830.1  
AT3G03720.1  
Orysa4|Os10g30090.1  
Orysa4|Os03g43980.1

Orysa4|Os03g43970.1  
AT1G68590.1 Orysa4|Os04g38750.1  
AT5G15760.1  
AT3G12050.1 Orysa4|Os08g36150.1  
AT4G27650.1,AT3G58390.1 Orysa4|Os04g56480.1  
AT2G44140.1,AT3G59950.1 Orysa4|Os03g27350.1,Orysa4|Os04g58560.1  
AT1G27760.3 Orysa4|Os07g39900.1,Orysa4|Os03g33590.1  
Orysa4|Os02g12720.1  
AT1G50430.1 Orysa4|Os02g26650.1  
AT4G24730.1 Orysa4|Os07g48840.1  
Orysa4|Os01g15450.1  
AT3G21360.1 Orysa4|Os01g09430.1  
Orysa4|Os08g29510.1  
AT1G14070.1,AT2G03220.1,AT2G15370.1,AT1G14080.1,AT2G03210.1,AT2G15390.1  
Orysa4|Os06g10930.1,Orysa4|Os02g52630.1,Orysa4|Os06g10960.1,Orysa4|Os06g10950.1  
Orysa4|Os02g52610.1,Orysa4|Os06g10970.1  
Orysa4|Os04g37650.1,Orysa4|Os08g24750.1,Orysa4|Os06g10980.1,Orysa4|Os09g28460.1,Orysa4|Os04  
g37640.1,Orysa4|Os06g10920.1  
Orysa4|Os03g50800.1  
Orysa4|Os02g17534.1,Orysa4|Os02g17600.1  
Orysa4|Os10g03650.1  
Orysa4|Os02g52590.1  
Orysa4|Os06g10910.1  
Orysa4|Os02g25630.1  
AT3G54470.1 Orysa4|Os01g72240.1,Orysa4|Os01g72250.1  
AT3G55010.1 Orysa4|Os03g61600.1  
AT4G34840.1 Orysa4|Os06g02220.1  
AT4G38800.1  
AT1G65820.1 Orysa4|Os03g50130.1  
AT3G06483.1 Orysa4|Os07g44330.1,Orysa4|Os03g25400.1  
AT1G74260.1 Orysa4|Os05g01440.1,Orysa4|Os01g66500.1  
AT5G61450.1 Orysa4|Os03g01250.1,Orysa4|Os07g28260.1  
AT5G11500.1 Orysa4|Os05g13440.1  
Orysa4|Os01g54670.1  
AT3G25400.1 Orysa4|Os04g43550.1  
Orysa4|Os02g27810.1  
AT5G67460.1 Orysa4|Os10g20650.1  
AT3G13560.1 Orysa4|Os07g38930.1  
AT1G30080.1,AT4G18340.1 Orysa4|Os06g34020.1  
AT2G05790.1,AT5G55180.1 Orysa4|Os02g53200.1  
AT3G57260.1,AT3G57270.1,AT3G57240.1 Orysa4|Os05g41610.1,Orysa4|Os01g58730.1  
AT5G24318.1 Orysa4|Os11g47820.1  
AT2G26600.1 Orysa4|Os02g10660.1,Orysa4|Os06g40490.1  
AT2G01630.1 Orysa4|Os03g12140.1  
AT5G42100.1,AT1G32860.1 Orysa4|Os06g04080.1,Orysa4|Os10g07290.1,Orysa4|Os03g14210.1  
AT5G56590.1 Orysa4|Os01g53750.1  
AT1G09460.1 Orysa4|Os03g61780.1  
AT2G30933.1 Orysa4|Os05g50490.1  
AT5G61130.1,AT5G08000.1,AT1G18650.1 Orysa4|Os03g54910.1,Orysa4|Os01g55820.1  
AT3G58100.1 Orysa4|Os06g34660.1  
AT2G43660.2,AT3G28250.1,AT1G78520.1,AT2G43670.1 Orysa4|Os01g14140.1  
AT4G34480.1,AT2G16230.1 Orysa4|Os03g46660.1  
AT2G04910.1  
AT4G26830.1  
AT5G20330.1,AT5G20560.1,AT1G33220.1,AT5G20340.1,AT5G20390.1  
AT1G77790.1,AT1G77780.1  
AT4G09090.1,AT3G55430.1  
AT2G39640.1  
AT3G15800.1  
AT3G55780.1,AT1G66250.1  
AT5G35740.1  
AT1G11820.1  
AT4G29360.1  
AT3G61810.1  
AT4G16165.1,AT1G66855.1,AT1G66870.1,AT4G05430.1  
AT2G03505.1  
AT1G26450.1  
AT5G53610.1,AT5G53600.1  
AT5G63240.1  
AT5G42720.1  
Orysa4|Os03g25790.1  
Orysa4|Os07g43940.1  
Orysa4|Os08g14700.1,Orysa4|Os07g35350.1,Orysa4|Os07g35520.1  
Orysa4|Os01g71350.1,Orysa4|Os05g31140.1,Orysa4|Os01g71340.1,Orysa4|Os01g71810.1,Orysa4|Os01  
g71670.1,Orysa4|Os01g51570.1,Orysa4|Os01g71930.1,Orysa4|Os01g71400.1,Orysa4|Os01g71680.1,Orysa4|Os01g  
71380.1,Orysa4|Os01g71830.1,Orysa4|Os01g71410.1,Orysa4|Os01g71474.1,Orysa4|Os01g71860.1  
Orysa4|Os03g40330.1  
Orysa4|Os07g13580.1  
Orysa4|Os06g35920.1  
Orysa4|Os03g30830.1  
Orysa4|Os08g04140.1  
Orysa4|Os09g36280.1

Orysa4|Os03g12620.1  
AT3G23640.1 Orysa4|Os07g23880.1,Orysa4|Os07g23944.1  
AT5G11720.1 Orysa4|Os06g46284.1  
AT5G63840.1 Orysa4|Os03g11720.1  
AT3G45940.1,AT1G68560.1 Orysa4|Os01g03950.1  
AT2G43360.1 Orysa4|Os08g42730.1  
AT1G44575.1 Orysa4|Os01g64960.1,Orysa4|Os04g59440.1  
Orysa4|Os05g08590.1  
AT5G03555.1 Orysa4|Os02g44680.1  
AT5G03870.1 Orysa4|Os04g33680.1  
AT4G10630.1,AT1G32760.1 Orysa4|Os02g01200.1  
AT5G13810.1,AT3G57070.1,AT2G41330.1 Orysa4|Os03g24030.1,Orysa4|Os07g46570.1  
AT5G39865.1,AT3G28850.1 Orysa4|Os03g07470.1  
AT5G01420.1 Orysa4|Os03g44650.1  
AT1G64500.1 Orysa4|Os01g13480.1  
AT5G58530.1 Orysa4|Os05g28530.1,Orysa4|Os10g20310.1,Orysa4|Os05g39450.1,Orysa4|Os01g61350.1  
AT5G06470.1  
Orysa4|Os08g07450.1  
Orysa4|Os02g51370.1,Orysa4|Os06g12190.1,Orysa4|Os04g54860.1  
AT5G38430.1,AT5G38410.1,AT5G38420.1,AT1G67090.1  
Orysa4|Os12g19394.1,Orysa4|Os12g17600.1,Orysa4|Os12g19470.1  
Orysa4|Os02g05830.1  
AT4G17260.1 Orysa4|Os02g01510.1,Orysa4|Os06g01590.1  
AT5G05570.1 Orysa4|Os07g49300.1  
Orysa4|Os04g47700.1  
AT1G63900.1 Orysa4|Os07g45350.1  
AT1G59560.1  
Orysa4|Os03g24500.1  
Orysa4|Os03g24480.1  
AT1G69340.1 Orysa4|Os10g30750.1  
Orysa4|Os03g05660.1  
AT5G64200.1 Orysa4|Os07g43050.1  
Orysa4|Os03g27030.1,Orysa4|Os08g37960.1  
AT5G18660.1 Orysa4|Os03g22780.1  
AT5G10690.1 Orysa4|Os09g26190.1  
AT3G05870.1 Orysa4|Os07g22840.1  
AT5G26640.1  
AT2G25070.1,AT4G31860.1 Orysa4|Os06g44210.1  
Orysa4|Os02g38780.1  
ATMG00410.1,ATMG01170.1,AT2G07741.1 Orysa4|Os12g23610.1,Orysa4|Os01g58010.1  
AT5G58090.1 Orysa4|Os02g04670.1  
AT5G20870.1 Orysa4|Os03g27980.1  
AT5G58480.1 Orysa4|Os03g18520.1  
AT4G17180.1 Orysa4|Os09g09980.1,Orysa4|Os08g23720.1  
AT5G18220.1,AT1G64760.1,AT2G19440.1,AT3G04010.1  
Orysa4|Os03g57880.1,Orysa4|Os07g07340.1,Orysa4|Os03g45390.1  
AT4G31140.1  
AT3G24330.1  
Orysa4|Os08g12800.1  
Orysa4|Os06g39060.1  
Orysa4|Os05g45860.1  
Orysa4|Os11g36940.1  
AT5G57180.2,AT4G25990.2 Orysa4|Os02g05470.1,Orysa4|Os06g48610.1  
AT5G14370.1  
AT5G55510.1,AT4G26670.1 Orysa4|Os03g09870.1  
Orysa4|Os12g33020.1  
AT4G36940.1,AT2G23420.1 Orysa4|Os04g35060.1,Orysa4|Os03g62110.1  
AT1G79830.1 Orysa4|Os05g48620.1  
AT5G14990.1 Orysa4|Os04g44090.1  
AT2G34730.1 Orysa4|Os12g41810.1,Orysa4|Os09g04810.1,Orysa4|Os03g57110.1  
AT1G32750.1,AT3G19040.1 Orysa4|Os06g43790.1  
AT3G66652.1 Orysa4|Os03g19570.1  
AT5G58040.1 Orysa4|Os03g51520.1  
AT2G27170.1 Orysa4|Os02g04050.1,Orysa4|Os02g04080.1  
Orysa4|Os02g04060.1  
AT5G06710.1 Orysa4|Os08g36220.1,Orysa4|Os09g27450.1  
AT2G22800.1,AT4G37790.1 Orysa4|Os03g12860.1,Orysa4|Os10g01470.1  
AT4G17460.1,AT2G44910.1,AT5G47370.1,AT4G16780.1,AT3G60390.1 Orysa4|Os10g41230.1  
AT2G01430.1 Orysa4|Os01g45570.1  
AT1G70920.1  
Orysa4|Os02g35770.1  
Orysa4|Os06g48290.1  
Orysa4|Os09g38890.1  
Orysa4|Os02g05640.1,Orysa4|Os06g04850.1,Orysa4|Os06g04870.1  
Orysa4|Os10g39720.1  
Orysa4|Os04g46350.1  
Orysa4|Os05g50130.1  
AT5G26770.1,AT3G05830.1 Orysa4|Os05g04530.1  
AT1G09483.1,AT1G09470.1  
Orysa4|Os01g18840.1  
AT3G49055.1 Orysa4|Os08g44550.1  
AT1G24560.1 Orysa4|Os09g39200.1

AT3G19840.1 Orysa4|Os10g34380.1  
AT1G60200.1 Orysa4|Os08g32100.1  
AT2G30880.1 Orysa4|Os03g46340.1,Orysa4|Os07g04550.1  
Orysa4|Os05g06170.1  
AT1G55928.1,AT2G27285.1,AT2G27280.1 Orysa4|Os04g35910.1  
AT4G02720.1 Orysa4|Os09g28220.1  
Orysa4|Os08g36750.1  
AT4G20760.1 Orysa4|Os12g41590.1  
AT4G22350.1 Orysa4|Os09g24250.1  
AT4G22410.1  
AT1G16770.1 Orysa4|Os02g04780.1  
AT5G21160.1 Orysa4|Os01g16110.1  
AT5G44500.1,AT4G20440.1 Orysa4|Os07g07220.1  
AT2G28240.1,AT1G08060.1 Orysa4|Os02g02050.1,Orysa4|Os02g41610.1,Orysa4|Os06g01320.1  
AT2G32600.1 Orysa4|Os03g15700.1  
AT3G16650.1,AT4G15900.1 Orysa4|Os03g21990.1  
AT1G58230.1 Orysa4|Os06g46480.1  
AT1G58227.1  
AT4G05410.1,AT4G21130.1 Orysa4|Os03g42770.1  
AT5G02010.1 Orysa4|Os05g38000.1,Orysa4|Os01g62990.1  
AT3G24620.1,AT1G79860.1,AT5G19560.1,AT4G13240.1  
Orysa4|Os02g17240.1,Orysa4|Os05g48640.1,Orysa4|Os01g48410.1  
AT4G38430.1 Orysa4|Os09g37270.1  
AT1G31650.1 Orysa4|Os02g47420.1  
AT4G00460.1,AT2G45890.1,AT1G01700.1 Orysa4|Os07g29780.1,Orysa4|Os10g40270.1  
AT3G55660.1,AT5G05940.1  
AT3G16130.1  
Orysa4|Os01g55520.1  
Orysa4|Os04g44170.1  
AT5G25150.1 Orysa4|Os07g10520.1,Orysa4|Os06g44030.1  
AT3G05090.1 Orysa4|Os12g06810.1  
AT3G07300.1 Orysa4|Os10g25320.1  
AT5G16780.1 Orysa4|Os02g30730.1  
AT3G14700.1  
AT3G25840.1 Orysa4|Os12g44330.1  
AT3G53640.1,AT1G13350.1  
Orysa4|Os03g50230.1  
AT5G51410.1 Orysa4|Os07g27300.1  
AT1G53720.1 Orysa4|Os06g45900.1,Orysa4|Os06g45910.1  
AT1G44478.1  
AT1G80930.1,AT1G52325.1 Orysa4|Os12g17550.1,Orysa4|Os12g15420.1,Orysa4|Os11g05390.1  
AT5G25060.1,AT5G10800.1 Orysa4|Os02g08360.1  
AT2G37150.1 Orysa4|Os05g07070.1,Orysa4|Os01g06590.1  
AT5G24870.1,AT5G10650.1,AT4G31450.1 Orysa4|Os02g05692.1,Orysa4|Os06g48040.1  
AT3G15070.1,AT1G53190.1 Orysa4|Os01g47740.1,Orysa4|Os05g48970.1  
AT3G63530.1 Orysa4|Os03g07790.1  
AT1G17970.1,AT1G73760.1 Orysa4|Os01g49770.1,Orysa4|Os05g47670.1  
Orysa4|Os04g51400.1,Orysa4|Os08g14320.1  
Orysa4|Os09g35690.1,Orysa4|Os04g48260.1  
AT1G33520.1,AT4G25020.1 Orysa4|Os03g14860.1  
AT3G20550.1 Orysa4|Os05g46780.1  
AT2G24410.1  
Orysa4|Os05g46860.1  
AT1G28060.1 Orysa4|Os09g07500.1  
AT3G56790.1,AT3G55930.1  
AT1G65280.1 Orysa4|Os01g33800.1  
Orysa4|Os01g33840.1  
AT4G30600.1 Orysa4|Os08g37444.1  
AT1G01510.1 Orysa4|Os10g38900.1  
Orysa4|Os03g03460.1  
AT3G06950.1 Orysa4|Os05g19954.1  
AT4G32610.1,AT2G25670.1 Orysa4|Os05g08730.1,Orysa4|Os01g08410.1  
AT1G67120.1 Orysa4|Os10g31864.1  
AT3G21090.1,AT1G51500.1 Orysa4|Os05g13520.1  
AT2G28070.1 Orysa4|Os03g64200.1  
AT1G17840.1 Orysa4|Os04g44610.1,Orysa4|Os10g35180.1  
AT1G51460.1  
AT3G21080.1  
Orysa4|Os09g29670.1,Orysa4|Os09g07670.1,Orysa4|Os09g29660.1,Orysa4|Os12g22284.1,Orysa4|Os07  
g18874.1,Orysa4|Os09g03939.1  
Orysa4|Os12g22110.1,Orysa4|Os10g08014.1  
AT5G06680.1 Orysa4|Os09g27370.1  
AT4G03320.1 Orysa4|Os07g38110.1  
AT2G33630.1 Orysa4|Os02g48460.1  
AT5G24890.1,AT4G31510.1,AT2G24550.1 Orysa4|Os08g40510.1,Orysa4|Os09g32330.1  
AT3G21640.1 Orysa4|Os11g05090.1,Orysa4|Os12g05090.1  
AT4G23570.3,AT4G11260.1 Orysa4|Os01g43540.1  
Orysa4|Os01g32930.1  
AT1G14030.1 Orysa4|Os09g24530.1  
AT2G27920.1 Orysa4|Os03g27480.1,Orysa4|Os03g27590.1  
Orysa4|Os03g27530.1,Orysa4|Os03g27510.1  
Orysa4|Os08g44640.1



AT5G55920.1,AT4G26600.1 Orysa4|Os02g49270.1,Orysa4|Os09g37860.1  
AT4G25450.1 Orysa4|Os07g28090.1  
AT2G47000.1,AT4G01830.1,AT4G01820.1,AT1G02530.1,AT1G02520.1,AT3G62150.1 Orysa4|Os01g18670.1  
AT1G70610.1 Orysa4|Os01g68330.1  
AT3G55320.1,AT2G39480.1 Orysa4|Os03g17180.1,Orysa4|Os01g74470.1  
AT1G63270.1 Orysa4|Os04g53550.1  
AT1G10680.1,AT4G25960.1,AT1G27940.1,AT1G28010.1,AT3G28390.1,AT3G28860.1,AT3G28415.1  
Orysa4|Os02g09720.1,Orysa4|Os04g38570.1,Orysa4|Os02g46680.1,Orysa4|Os04g40570.1,Orysa4|Os05  
g47490.1,Orysa4|Os08g05710.1,Orysa4|Os01g52550.1  
AT5G14100.1 Orysa4|Os11g29850.1  
AT1G67940.1 Orysa4|Os06g48060.1  
AT4G33460.1 Orysa4|Os01g56400.1  
AT5G39040.1 Orysa4|Os03g54790.1  
AT1G65410.1 Orysa4|Os03g46740.1  
AT5G03910.1 Orysa4|Os04g33700.1  
AT4G28620.1,AT4G28630.1,AT5G58270.1 Orysa4|Os06g03770.1  
AT5G46540.1  
AT4G18050.1  
AT3G28360.1,AT3G28345.1  
AT3G28380.1  
Orysa4|Os05g04600.1,Orysa4|Os05g47500.1  
Orysa4|Os01g34970.1,Orysa4|Os05g04610.1,Orysa4|Os02g21750.1,Orysa4|Os01g50160.1  
Orysa4|Os01g50080.1  
Orysa4|Os04g54930.1  
Orysa4|Os03g54880.1  
AT2G26510.1 Orysa4|Os12g39420.1  
AT2G34190.1 Orysa4|Os01g55500.1,Orysa4|Os09g15170.1  
AT2G05760.1  
Orysa4|Os08g28170.1  
AT1G65470.1 Orysa4|Os01g67100.1  
Orysa4|Os07g17210.1  
AT5G45290.1 Orysa4|Os05g32350.1  
Orysa4|Os02g55520.1  
AT5G35930.1 Orysa4|Os06g02160.1  
AT4G39120.1 Orysa4|Os07g09330.1  
Orysa4|Os09g15400.1  
AT5G51440.1,AT4G25200.1 Orysa4|Os06g11610.1,Orysa4|Os02g52150.1  
AT3G50590.1 Orysa4|Os09g24260.1  
AT5G06420.1,AT1G01350.1 Orysa4|Os02g19804.1  
AT4G01023.1  
AT5G24270.1 Orysa4|Os05g45810.1,Orysa4|Os01g41510.1  
AT4G26570.2,AT5G55990.1 Orysa4|Os03g42840.1,Orysa4|Os12g40510.1  
AT4G33000.1 Orysa4|Os01g39770.1  
AT1G64480.1  
AT4G01420.1  
AT4G16350.1  
AT4G26560.1  
Orysa4|Os02g18930.1,Orysa4|Os02g18880.1  
Orysa4|Os03g33570.1  
Orysa4|Os02g27820.1,Orysa4|Os02g27880.1  
Orysa4|Os02g27940.1  
AT5G05970.1 Orysa4|Os09g09470.1  
AT4G21520.1 Orysa4|Os03g52794.1  
AT2G35075.1  
AT5G14230.1 Orysa4|Os04g41290.1  
Orysa4|Os02g25960.1  
AT5G40160.1 Orysa4|Os06g13000.1  
AT5G66055.1 Orysa4|Os03g04300.1  
AT4G14790.1 Orysa4|Os03g53500.1  
AT5G39840.1 Orysa4|Os04g38630.1  
AT1G71696.2 Orysa4|Os06g05240.1  
AT3G07560.1 Orysa4|Os07g05810.1,Orysa4|Os03g57210.1  
AT1G27090.1 Orysa4|Os03g48260.1  
AT3G24690.1  
Orysa4|Os11g11180.1  
AT3G16090.1,AT1G65040.2 Orysa4|Os06g19680.1  
AT5G25620.1,AT4G13260.1 Orysa4|Os01g53200.1,Orysa4|Os05g45240.1  
AT2G33230.1,AT1G04180.1,AT5G43890.1,AT1G04610.1,AT4G28720.1 Orysa4|Os04g03980.1  
AT1G21430.1 Orysa4|Os11g10170.1,Orysa4|Os12g08780.1,Orysa4|Os02g17230.1  
AT4G32540.1,AT5G11320.1 Orysa4|Os01g45760.1  
AT1G48910.1  
Orysa4|Os01g12490.1  
Orysa4|Os01g25470.1  
Orysa4|Os03g06654.1  
Orysa4|Os12g32750.1  
Orysa4|Os07g25540.1  
AT5G60190.1 Orysa4|Os12g01180.1,Orysa4|Os11g01180.1  
Orysa4|Os08g39040.1,Orysa4|Os12g01290.1  
AT4G26470.1 Orysa4|Os02g10470.1,Orysa4|Os06g40720.1  
AT3G24110.1  
AT5G19380.1 Orysa4|Os01g72570.1  
AT5G12160.1

AT5G12170.1  
AT2G43940.1 Orysa4|Os06g06040.1  
AT2G43910.1,AT2G43920.1  
Orysa4|Os03g62670.1  
AT2G43945.1,AT3G59870.1 Orysa4|Os01g23680.1  
AT3G47950.1,AT5G62670.1 Orysa4|Os12g44150.1,Orysa4|Os03g48310.1  
Orysa4|Os03g01120.1  
Orysa4|Os07g09340.1  
Orysa4|Os02g57920.1  
Orysa4|Os03g01670.1  
AT5G08600.1,AT4G02400.1 Orysa4|Os03g22320.1  
AT5G36980.1  
AT1G25540.1 Orysa4|Os09g13610.1  
AT5G64420.1 Orysa4|Os02g04270.1  
AT5G28740.1 Orysa4|Os07g44970.1  
Orysa4|Os01g49270.1,Orysa4|Os06g12910.1  
AT3G17040.1 Orysa4|Os03g19560.1  
AT1G73250.1,AT1G17890.1 Orysa4|Os06g44270.1  
Orysa4|Os06g44260.1  
AT5G04260.1 Orysa4|Os02g57380.1  
AT5G06690.2  
Orysa4|Os02g53400.1  
AT5G51970.1 Orysa4|Os08g43190.1  
AT3G01460.1 Orysa4|Os02g09920.1  
Orysa4|Os02g09910.1  
AT1G79010.1,AT1G16700.1 Orysa4|Os03g56300.1  
AT1G77510.1,AT1G21750.1 Orysa4|Os11g09280.1  
AT3G62510.1  
Orysa4|Os04g35600.1,Orysa4|Os02g34940.1  
AT1G29240.1,AT2G30990.1 Orysa4|Os01g55410.1  
AT4G18630.1,AT2G34170.1  
AT2G35320.1 Orysa4|Os06g02028.1  
AT1G76690.1,AT1G76680.2 Orysa4|Os06g11240.1,Orysa4|Os06g11200.1,Orysa4|Os06g11280.1  
AT2G06050.1 Orysa4|Os08g35740.1  
AT1G17990.1,AT1G18020.1  
Orysa4|Os06g11250.1,Orysa4|Os01g27230.1,Orysa4|Os02g35310.1  
Orysa4|Os06g11260.1  
Orysa4|Os01g27240.1  
AT5G16620.1 Orysa4|Os04g35900.1  
AT5G48220.1 Orysa4|Os04g39270.1  
AT2G04400.1  
Orysa4|Os09g08130.1  
AT3G60820.1 Orysa4|Os09g32800.1,Orysa4|Os08g41730.1  
AT3G06310.1,AT5G18800.1 Orysa4|Os03g18420.1  
AT3G46450.2 Orysa4|Os03g60610.1  
AT5G41110.1,AT3G26890.1 Orysa4|Os08g42420.1,Orysa4|Os09g33520.1  
AT2G17320.1,AT2G17340.1,AT4G35360.1 Orysa4|Os06g21980.1  
AT4G15930.1 Orysa4|Os01g15260.1  
Orysa4|Os06g29690.1  
AT3G14590.1,AT1G53590.1 Orysa4|Os02g20970.1  
Orysa4|Os01g14050.1  
AT2G46900.1 Orysa4|Os09g33970.1  
AT5G47120.1 Orysa4|Os02g03280.1  
AT4G17580.1  
AT5G47130.1  
AT1G21410.1,AT1G77000.1 Orysa4|Os05g35110.1  
AT3G24570.1 Orysa4|Os01g12800.1  
AT2G32200.1,AT2G32210.1,AT2G32190.1,AT1G05340.1 Orysa4|Os07g38050.1  
AT1G56060.1  
AT5G05680.1 Orysa4|Os04g51900.1  
AT1G19330.1,AT1G75060.1 Orysa4|Os10g21460.1  
Orysa4|Os04g08450.1,Orysa4|Os02g57740.1  
AT5G13610.1 Orysa4|Os01g55860.1,Orysa4|Os07g49410.1  
AT1G69380.1  
AT1G67270.1,AT1G67780.1,AT5G38690.1 Orysa4|Os05g23530.1  
Orysa4|Os02g20950.1  
AT5G43930.1,AT1G04140.2 Orysa4|Os02g18820.1,Orysa4|Os09g12550.1  
AT1G16210.1 Orysa4|Os03g03980.1,Orysa4|Os04g47370.1  
AT5G11580.1 Orysa4|Os01g52630.1  
AT3G54210.1 Orysa4|Os03g60100.1  
AT5G64650.1,AT5G09770.1 Orysa4|Os01g62210.1  
Orysa4|Os05g38580.1  
AT5G48950.1,AT1G48320.1 Orysa4|Os03g48480.1  
Orysa4|Os05g04660.1  
AT5G43860.1 Orysa4|Os10g28370.1  
AT1G19670.1  
AT3G15730.1,AT1G52570.1 Orysa4|Os05g07880.1,Orysa4|Os01g07760.1  
AT2G42010.1 Orysa4|Os03g02740.1,Orysa4|Os10g38060.1  
AT4G35790.1 Orysa4|Os09g37100.1  
AT5G25370.1  
AT4G11840.1,AT4G00240.1,AT4G11850.1,AT4G11830.2  
Orysa4|Os06g40170.1,Orysa4|Os06g40190.1,Orysa4|Os06g40180.1

Orysa4|Os03g62410.1,Orysa4|Os07g15680.1  
Orysa4|Os02g02790.1  
AT3G18890.1 Orysa4|Os10g01044.1  
AT5G55940.1 Orysa4|Os04g20230.1  
AT5G51620.2  
AT3G50960.1,AT5G66410.1 Orysa4|Os05g16630.1  
Orysa4|Os11g39140.1  
AT4G13615.1,AT3G24100.1 Orysa4|Os05g33700.1  
AT2G31140.1,AT1G06200.1 Orysa4|Os04g01240.1  
AT1G19485.1 Orysa4|Os01g63910.1,Orysa4|Os07g27140.1,Orysa4|Os02g20440.1  
AT3G06930.2,AT5G49020.1 Orysa4|Os07g47500.1  
AT2G23740.1 Orysa4|Os02g47900.1  
Orysa4|Os02g47890.1  
AT1G80000.1,AT1G15280.2 Orysa4|Os01g41190.1,Orysa4|Os05g45830.1  
AT1G77680.1 Orysa4|Os02g51780.1  
AT4G19670.1 Orysa4|Os12g43560.1  
AT1G65220.1,AT5G36230.1 Orysa4|Os11g21990.1  
AT5G11470.1 Orysa4|Os01g42460.1  
AT3G15605.1  
AT5G67220.1 Orysa4|Os06g49870.1  
AT4G14900.1,AT3G22440.1 Orysa4|Os07g07680.1,Orysa4|Os03g58070.1  
Orysa4|Os03g47804.1  
AT2G28480.1 Orysa4|Os01g72820.1  
AT3G27550.1 Orysa4|Os05g05300.1  
AT4G13070.1 Orysa4|Os06g20030.1  
AT3G43590.1,AT3G43490.1,AT5G36240.1 Orysa4|Os11g36480.1  
AT4G20430.1,AT5G44530.1 Orysa4|Os01g56320.1  
AT3G07940.1 Orysa4|Os05g31720.1,Orysa4|Os01g72230.1  
AT5G47710.1 Orysa4|Os09g07800.1  
AT1G04110.1 Orysa4|Os03g04950.1  
AT5G45650.1,AT5G45640.1 Orysa4|Os01g52750.1  
AT2G05920.1 Orysa4|Os10g25450.1  
AT5G37740.1,AT3G17980.1,AT1G48590.1,AT1G73580.1,AT1G66360.1 Orysa4|Os02g22130.1  
AT3G14240.1 Orysa4|Os08g35090.1  
AT5G67360.1 Orysa4|Os03g55350.1,Orysa4|Os03g40830.1  
AT1G32960.1,AT1G32950.1,AT4G21630.1,AT1G32940.1,AT4G21640.1,AT4G10530.1,AT5G11940.1,AT1G32970.1,AT4G10520.1,AT4G10540.1,AT4G10550.1,AT4G21650.1,AT4G10510.1,AT1G66210.1,AT4G21323.1,AT1G66220.1,AT4G21326.1 Orysa4|Os09g36110.1  
AT4G26330.1 Orysa4|Os03g06290.1  
AT4G34980.1 Orysa4|Os03g13930.1  
AT2G19170.1,AT4G30020.1 Orysa4|Os06g48650.1  
AT3G14067.1 Orysa4|Os02g53860.1  
AT5G59810.1,AT2G04160.1 Orysa4|Os02g10520.1,Orysa4|Os06g40700.1  
AT1G30600.1  
AT5G03620.1  
AT1G70810.1,AT1G70790.1,AT1G70800.1  
AT5G51750.1  
AT1G01900.1  
AT5G59110.1  
AT4G00230.1  
AT1G32980.1  
AT1G62340.1  
AT4G21160.1,AT4G05330.1  
Orysa4|Os12g23980.1  
Orysa4|Os09g26920.1  
Orysa4|Os07g39020.1  
Orysa4|Os07g31830.1,Orysa4|Os07g01770.1  
Orysa4|Os07g01780.1  
Orysa4|Os07g27850.1  
Orysa4|Os03g31630.1  
Orysa4|Os05g36010.1,Orysa4|Os04g35140.1  
Orysa4|Os04g03660.1,Orysa4|Os04g02980.1,Orysa4|Os04g03050.1,Orysa4|Os04g03796.1,Orysa4|Os04g03100.1,Orysa4|Os11g15530.1  
Orysa4|Os02g17080.1,Orysa4|Os04g03810.1,Orysa4|Os01g58240.1,Orysa4|Os02g17090.1,Orysa4|Os01g58260.1,Orysa4|Os01g58280.1,Orysa4|Os02g16940.1,Orysa4|Os01g58290.1,Orysa4|Os02g17000.1,Orysa4|Os02g17060.1  
Orysa4|Os11g15520.1,Orysa4|Os04g03060.1  
Orysa4|Os04g02970.1,Orysa4|Os04g03802.1,Orysa4|Os04g03850.1  
Orysa4|Os04g02990.1  
Orysa4|Os05g30580.1,Orysa4|Os04g47160.1  
Orysa4|Os04g45960.1  
Orysa4|Os04g47150.1,Orysa4|Os07g48650.1,Orysa4|Os04g10360.1,Orysa4|Os02g44590.1  
Orysa4|Os02g53840.1,Orysa4|Os02g53910.1,Orysa4|Os02g53970.1,Orysa4|Os02g53850.1  
Orysa4|Os01g50680.1  
Orysa4|Os06g41880.1  
Orysa4|Os09g30250.1  
AT3G28960.1,AT5G15240.1 Orysa4|Os06g12320.1,Orysa4|Os04g38680.1  
AT5G16740.1 Orysa4|Os11g19240.1  
AT2G39130.1,AT3G54830.1 Orysa4|Os02g01100.1  
AT2G41190.1 Orysa4|Os02g54730.1  
AT3G09330.1  
Orysa4|Os04g38660.1

Orysa4|Os01g41400.1,Orysa4|Os01g40410.1  
Orysa4|Os01g40380.1,Orysa4|Os05g30150.1,Orysa4|Os01g40360.1  
Orysa4|Os04g38670.1  
Orysa4|Os04g12508.1  
Orysa4|Os04g12530.1  
Orysa4|Os08g31900.1,Orysa4|Os12g38570.1  
Orysa4|Os04g12499.1  
AT4G34030.1 Orysa4|Os08g32850.1  
AT4G29680.1 Orysa4|Os01g10020.1  
AT4G29710.1,AT4G29690.1,AT4G29700.1  
AT2G45000.1 Orysa4|Os01g63780.1  
AT2G33490.1 Orysa4|Os02g31080.1,Orysa4|Os04g32370.1  
Orysa4|Os09g33510.1  
AT5G13450.1 Orysa4|Os06g43850.1  
AT5G22790.1 Orysa4|Os04g44290.1  
AT2G37860.3  
Orysa4|Os03g27340.1  
Orysa4|Os07g13590.1  
AT5G06160.1 Orysa4|Os03g50850.1  
AT1G35530.1 Orysa4|Os11g07870.1  
AT1G64180.1,AT5G41620.1 Orysa4|Os02g15980.1,Orysa4|Os06g31190.1  
AT2G46250.1  
AT3G52390.2 Orysa4|Os07g06440.1  
Orysa4|Os07g06410.1  
Orysa4|Os08g06880.1  
AT2G32380.1,AT1G05220.1,AT1G05210.1 Orysa4|Os07g27430.1,Orysa4|Os03g44450.1,Orysa4|Os07g27450.1  
AT5G23630.1 Orysa4|Os05g33390.1  
AT2G46520.1 Orysa4|Os01g13430.1  
AT3G08960.1 Orysa4|Os07g49260.1,Orysa4|Os03g18190.1  
AT3G08955.1  
AT5G06960.1,AT5G06950.1,AT3G12250.4 Orysa4|Os01g59350.1,Orysa4|Os03g20310.1,Orysa4|Os01g17260.1  
AT5G65210.1,AT5G10030.1,AT1G77920.1,AT1G22070.1 Orysa4|Os04g54474.1  
AT5G06839.1 Orysa4|Os09g31390.1  
AT1G08320.1 Orysa4|Os01g64020.1,Orysa4|Os05g37170.1  
AT1G68640.1  
Orysa4|Os05g41280.1  
Orysa4|Os07g48820.1  
Orysa4|Os08g07970.1  
Orysa4|Os02g10150.1  
Orysa4|Os06g41100.1,Orysa4|Os09g10840.1  
Orysa4|Os02g10140.1  
Orysa4|Os12g05680.1  
AT5G48485.1,AT5G48490.1 Orysa4|Os07g18750.1,Orysa4|Os07g18990.1  
Orysa4|Os01g68589.1,Orysa4|Os07g19000.1  
AT1G20440.1,AT1G20450.1,AT1G76180.1 Orysa4|Os02g44870.1  
AT2G26280.1 Orysa4|Os06g09890.1  
Orysa4|Os03g08270.1  
AT4G12740.1 Orysa4|Os12g10850.1  
Orysa4|Os12g10910.1  
Orysa4|Os12g10830.1  
AT1G70070.1 Orysa4|Os02g50560.1  
AT5G14520.1 Orysa4|Os03g49210.1  
AT1G58110.1 Orysa4|Os11g11100.1,Orysa4|Os12g09250.1  
AT1G35490.1  
Orysa4|Os12g09270.1  
AT1G16680.1 Orysa4|Os12g41820.1  
AT5G49580.1 Orysa4|Os03g61730.1  
AT1G79030.1  
AT3G56980.1,AT5G04150.1,AT2G41240.1,AT3G56970.1 Orysa4|Os01g72370.1  
AT1G66470.1,AT5G37800.1 Orysa4|Os02g48060.1,Orysa4|Os01g02110.1  
AT4G33880.1,AT2G14760.1 Orysa4|Os03g10770.1,Orysa4|Os03g42100.1,Orysa4|Os12g39850.1  
AT4G02590.1,AT1G03040.1 Orysa4|Os03g58330.1  
AT4G30980.1,AT2G24260.1 Orysa4|Os02g55250.1,Orysa4|Os09g25040.1  
AT1G27740.1,AT5G43175.1  
AT5G58010.1  
Orysa4|Os11g41640.1  
Orysa4|Os07g39940.1  
Orysa4|Os03g55550.1  
Orysa4|Os07g08440.1  
AT1G80460.1 Orysa4|Os04g55410.1  
AT4G17370.1 Orysa4|Os08g05280.1  
AT5G47860.1 Orysa4|Os04g33280.1  
AT1G22970.1,AT1G71150.1,AT1G22980.1 Orysa4|Os05g48070.1  
AT4G04330.1 Orysa4|Os08g32930.1  
AT1G22180.2,AT4G08690.1 Orysa4|Os02g51610.1  
AT1G01630.1 Orysa4|Os01g70210.1,Orysa4|Os03g63370.1  
AT4G36640.1,AT1G75170.1 Orysa4|Os03g51430.1  
AT1G14820.3  
Orysa4|Os05g18294.1,Orysa4|Os05g18470.1,Orysa4|Os01g16000.1  
AT5G27410.1,AT3G05190.1 Orysa4|Os03g24460.1  
AT1G08400.1 Orysa4|Os07g48720.1  
AT3G47700.1 Orysa4|Os02g51330.1

Orysa4|Os03g10310.1  
AT5G22620.1 Orysa4|Os11g05260.1  
Orysa4|Os01g13570.1  
AT5G53490.1 Orysa4|Os10g35810.1  
AT4G02030.1 Orysa4|Os03g52770.1  
AT5G55580.1 Orysa4|Os07g39430.1  
AT3G30775.1,AT5G38710.1 Orysa4|Os10g40360.1  
AT3G49490.1 Orysa4|Os08g06130.1  
AT4G11350.1,AT5G41460.1,AT4G23490.1  
Orysa4|Os02g45700.1,Orysa4|Os03g03270.1,Orysa4|Os10g39020.1,Orysa4|Os04g48950.1  
AT2G37730.1,AT3G11420.1 Orysa4|Os03g16334.1  
AT1G33250.1 Orysa4|Os10g37260.1  
AT1G05280.1,AT4G15240.1 Orysa4|Os08g04300.1  
AT1G07850.1  
AT1G01570.1,AT4G00300.1  
AT5G12460.1  
Orysa4|Os06g19820.1,Orysa4|Os11g02650.1  
Orysa4|Os02g31210.1  
Orysa4|Os03g16290.1  
AT5G13800.1 Orysa4|Os06g24730.1  
AT2G18360.1,AT4G36610.1 Orysa4|Os02g47780.1,Orysa4|Os01g44960.1  
AT3G25660.1 Orysa4|Os04g55050.1  
AT5G18590.1 Orysa4|Os12g35350.1,Orysa4|Os11g43590.1  
AT4G36080.1,AT2G17930.1 Orysa4|Os07g45070.1  
AT3G01720.1 Orysa4|Os01g67750.1  
AT3G54610.1 Orysa4|Os10g28040.1  
AT4G13345.1,AT3G24460.1 Orysa4|Os01g08460.1  
AT2G33205.1 Orysa4|Os04g42720.1  
AT4G18350.1,AT3G14440.1,AT1G30100.1,AT1G78390.1  
Orysa4|Os12g42280.1,Orysa4|Os07g05940.1,Orysa4|Os03g44380.1  
AT3G63520.1 Orysa4|Os12g44310.1  
AT4G19170.1 Orysa4|Os12g24800.1,Orysa4|Os02g47510.1  
AT3G24220.1  
Orysa4|Os04g04230.1  
Orysa4|Os10g08980.1  
AT1G61150.2 Orysa4|Os03g13220.1  
AT1G11110.1  
AT4G09300.1  
AT1G17450.1,AT1G58766.1,AT1G59453.1,AT1G59077.1 Orysa4|Os02g42200.1  
Orysa4|Os02g21210.1  
Orysa4|Os02g21190.1  
AT3G28460.1 Orysa4|Os03g52640.1  
AT1G77855.1,AT1G22030.1 Orysa4|Os01g65420.1  
Orysa4|Os02g34710.1,Orysa4|Os08g01400.1  
AT5G41970.1 Orysa4|Os02g46150.1  
AT3G49320.1  
AT5G22080.1 Orysa4|Os03g15480.1  
AT5G22770.1,AT5G22780.1 Orysa4|Os03g02150.1  
AT2G47600.1 Orysa4|Os11g43860.1  
Orysa4|Os02g43110.1  
AT1G11060.1,AT1G61030.1 Orysa4|Os10g35380.1  
AT3G04780.1 Orysa4|Os03g58130.1  
AT4G38630.1 Orysa4|Os03g13970.1  
Orysa4|Os10g05180.1  
AT1G68260.1,AT1G35290.1,AT1G68280.1,AT1G35250.1 Orysa4|Os04g46730.1  
Orysa4|Os02g44134.1,Orysa4|Os02g44200.1  
AT2G28390.1 Orysa4|Os01g74460.1  
AT1G78580.1 Orysa4|Os05g44210.1  
AT1G68020.2 Orysa4|Os09g23350.1  
AT1G23870.1,AT1G70290.1,AT1G60140.1 Orysa4|Os08g31980.1,Orysa4|Os09g20990.1  
AT1G17000.1,AT4G27550.1,AT1G16980.1  
AT4G17770.1  
Orysa4|Os03g12360.1  
Orysa4|Os05g03810.1,Orysa4|Os12g32130.1,Orysa4|Os05g06160.1  
Orysa4|Os02g54820.1,Orysa4|Os08g34580.1  
Orysa4|Os09g25890.1  
AT4G28030.1 Orysa4|Os08g16010.1  
AT1G24310.1 Orysa4|Os07g19494.1  
AT2G33560.1 Orysa4|Os02g10020.1  
AT2G20635.1  
AT3G12280.1 Orysa4|Os08g42600.1  
Orysa4|Os11g32900.1  
AT2G19080.1 Orysa4|Os06g07160.1  
AT4G32150.1,AT5G11150.1,AT2G25340.1 Orysa4|Os02g55990.1,Orysa4|Os06g07780.1  
AT3G54300.1 Orysa4|Os08g44430.1  
AT1G04760.1,AT2G32670.1 Orysa4|Os03g58840.1,Orysa4|Os07g09600.1  
AT1G04750.1,AT2G33120.2  
AT3G24890.1  
AT4G15780.1  
AT2G33110.1  
Orysa4|Os07g14540.1  
Orysa4|Os03g06960.1

AT3G07430.1,AT4G27990.1 Orysa4|Os07g08770.1  
AT5G66800.1,AT3G50640.1 Orysa4|Os09g28520.1,Orysa4|Os02g52490.1,Orysa4|Os08g36950.1  
AT1G62190.1,AT2G22890.1,AT4G27030.1 Orysa4|Os08g08850.1  
AT5G30510.1 Orysa4|Os03g20100.1  
AT1G67340.1 Orysa4|Os04g31610.1,Orysa4|Os01g69270.1,Orysa4|Os02g30300.1  
AT5G50450.1  
Orysa4|Os11g29710.1  
AT2G01980.1 Orysa4|Os12g44360.1  
AT1G14660.1  
AT2G27960.1 Orysa4|Os03g05300.1  
AT2G27970.1  
AT1G03910.1 Orysa4|Os03g58590.1  
Orysa4|Os04g47110.1  
AT1G33440.1,AT1G59740.1 Orysa4|Os11g12740.1,Orysa4|Os04g36040.1  
AT5G13400.1 Orysa4|Os01g01360.1  
AT4G21680.1,AT1G32450.1 Orysa4|Os02g46460.1  
AT1G12110.1 Orysa4|Os10g40600.1,Orysa4|Os08g05910.1,Orysa4|Os03g01290.1  
AT2G02040.1 Orysa4|Os03g51050.1  
AT1G52190.1,AT3G16180.1 Orysa4|Os01g55610.1  
AT1G68570.1 Orysa4|Os06g15370.1  
AT5G01180.1,AT3G54140.1 Orysa4|Os01g04950.1  
AT1G27080.1,AT1G69870.1 Orysa4|Os01g68510.1  
AT3G01350.1,AT5G14940.1 Orysa4|Os06g13200.1,Orysa4|Os06g13210.1  
AT3G45700.1,AT3G45660.1,AT3G45710.1,AT3G45720.1,AT3G45690.1,AT3G45680.1,AT3G45650.1  
Orysa4|Os05g27304.1  
AT1G27040.1,AT1G69850.1 Orysa4|Os06g38294.1  
AT5G46040.1,AT5G46050.1 Orysa4|Os10g33210.1  
AT3G53960.1,AT2G37900.1 Orysa4|Os03g60850.1  
AT3G21670.1 Orysa4|Os04g39030.1,Orysa4|Os02g37040.1  
AT1G72130.1,AT1G22550.1,AT1G72140.1,AT1G22540.1 Orysa4|Os01g65100.1,Orysa4|Os01g65110.1  
AT2G26690.1 Orysa4|Os01g37590.1  
AT1G18880.1,AT3G47960.1,AT5G62680.1 Orysa4|Os03g48180.1  
AT2G02020.1,AT1G62200.1  
AT3G54450.1  
AT5G28470.1  
AT1G69860.1  
AT3G25280.1,AT3G25260.1  
AT5G62730.1  
AT2G40460.1  
AT2G38100.1  
AT1G72120.1,AT1G22570.1  
Orysa4|Os12g12934.1  
Orysa4|Os02g48570.1  
Orysa4|Os11g18100.1  
Orysa4|Os03g13274.1,Orysa4|Os03g13240.1,Orysa4|Os03g13250.1  
Orysa4|Os10g02220.1,Orysa4|Os10g02260.1,Orysa4|Os10g02210.1,Orysa4|Os10g02240.1,Orysa4|Os10  
g22560.1  
Orysa4|Os10g42870.1,Orysa4|Os07g41250.1,Orysa4|Os04g50940.1,Orysa4|Os04g50950.1,Orysa4|Os02  
g47090.1,Orysa4|Os10g42900.1  
Orysa4|Os10g02340.1,Orysa4|Os06g49220.1  
Orysa4|Os10g02080.1  
Orysa4|Os03g17770.1,Orysa4|Os06g49250.1  
Orysa4|Os08g31960.1  
Orysa4|Os04g50930.1  
Orysa4|Os06g49230.1  
Orysa4|Os01g55600.1  
Orysa4|Os11g23890.1  
Orysa4|Os05g33960.1,Orysa4|Os05g34030.1,Orysa4|Os05g34010.1,Orysa4|Os05g34000.1  
Orysa4|Os01g67630.1,Orysa4|Os07g01070.1  
Orysa4|Os06g19560.1,Orysa4|Os01g67640.1  
Orysa4|Os04g34640.1  
Orysa4|Os04g56560.1  
Orysa4|Os12g15600.1  
Orysa4|Os04g41410.1,Orysa4|Os04g41450.1,Orysa4|Os11g18044.1,Orysa4|Os04g41400.1,Orysa4|Os11  
g17970.1  
Orysa4|Os11g18110.1  
Orysa4|Os03g04570.1,Orysa4|Os10g33170.1  
Orysa4|Os01g28980.1  
Orysa4|Os08g41600.1,Orysa4|Os04g59480.1  
Orysa4|Os01g65190.1,Orysa4|Os01g65200.1,Orysa4|Os01g65169.1,Orysa4|Os01g65150.1,Orysa4|Os05  
g35594.1  
Orysa4|Os05g35670.1  
Orysa4|Os01g65140.1,Orysa4|Os02g52060.1,Orysa4|Os01g65210.1,Orysa4|Os08g41590.1,Orysa4|Os05  
g35650.1,Orysa4|Os02g31980.1,Orysa4|Os09g16150.1,Orysa4|Os07g26450.1  
Orysa4|Os01g65130.1  
Orysa4|Os07g21960.1  
AT3G59580.1,AT2G43500.1 Orysa4|Os04g41850.1,Orysa4|Os11g16290.1  
AT1G20640.1,AT1G76350.1,AT4G35270.1 Orysa4|Os09g37710.1,Orysa4|Os03g03900.1  
AT1G64530.1,AT4G24020.1 Orysa4|Os01g13540.1  
AT4G38340.1  
AT2G17150.1  
Orysa4|Os11g40110.1,Orysa4|Os05g10380.1,Orysa4|Os02g04340.1

AT1G03260.1 Orysa4|Os07g46220.1  
AT5G19070.1  
AT1G12350.1,AT5G02080.1 Orysa4|Os08g07880.1,Orysa4|Os02g36550.1  
AT4G29120.1 Orysa4|Os01g53910.1  
AT1G71170.1,AT1G71180.1  
Orysa4|Os01g33500.1  
AT5G51010.1 Orysa4|Os11g32500.1  
AT1G80310.1 Orysa4|Os01g45830.1  
AT1G65080.1 Orysa4|Os06g07474.1  
AT3G44360.1  
AT3G44370.1  
AT5G15290.1 Orysa4|Os04g38690.1,Orysa4|Os06g12500.1,Orysa4|Os02g51010.1  
AT1G03700.1,AT4G03540.1 Orysa4|Os01g13560.1,Orysa4|Os05g15630.1  
AT5G44550.1,AT4G20390.1 Orysa4|Os12g41690.1  
AT3G06390.1,AT4G15610.1 Orysa4|Os07g26110.1  
AT2G36100.1,AT3G11550.1,AT2G27370.1,AT5G06200.1  
AT1G14160.1  
AT4G25040.1  
Orysa4|Os08g42430.1  
AT2G22010.1 Orysa4|Os07g43380.1  
AT5G10200.1 Orysa4|Os05g34820.1  
AT3G50030.1,AT5G43120.1  
AT1G27720.1,AT5G43130.1 Orysa4|Os03g32590.1,Orysa4|Os02g43750.1  
AT3G62790.1,AT2G47690.1 Orysa4|Os08g44250.1  
AT4G30220.1 Orysa4|Os02g08090.1,Orysa4|Os11g43620.1  
AT5G05360.1 Orysa4|Os05g27660.1,Orysa4|Os03g18700.1  
AT2G38450.1  
AT5G54650.1 Orysa4|Os04g01070.1,Orysa4|Os07g36150.1  
AT5G67470.1 Orysa4|Os03g10680.1,Orysa4|Os10g20710.1  
AT1G59910.1,AT1G70140.1 Orysa4|Os02g50570.1  
AT3G05470.1 Orysa4|Os04g38810.1  
AT3G25500.1 Orysa4|Os01g67240.1  
AT1G24150.1  
AT3G07540.1,AT5G48360.1  
AT2G43800.1  
Orysa4|Os02g06580.1  
Orysa4|Os07g39920.1  
Orysa4|Os08g33430.1  
Orysa4|Os09g34180.1  
AT2G41490.1,AT3G57220.1 Orysa4|Os07g46640.1  
AT1G27380.1 Orysa4|Os11g28310.1,Orysa4|Os01g68890.1,Orysa4|Os03g63060.1  
AT5G16490.1  
AT5G04500.1 Orysa4|Os05g46260.1  
Orysa4|Os03g48010.1  
AT5G22950.1 Orysa4|Os07g29630.1  
AT3G45000.1  
AT5G63280.1 Orysa4|Os12g13130.1  
AT5G40710.1  
AT1G63110.1,AT1G12730.1 Orysa4|Os02g46350.1  
Orysa4|Os01g64990.1  
AT5G21050.1 Orysa4|Os03g51210.1  
AT5G64090.1 Orysa4|Os11g06860.1  
AT2G39810.1 Orysa4|Os03g52700.1  
Orysa4|Os03g52710.1  
AT1G33450.1,AT5G15690.1,AT4G04780.1 Orysa4|Os08g04150.1  
AT4G35040.1,AT2G16770.1 Orysa4|Os06g50310.1  
Orysa4|Os05g41540.1,Orysa4|Os01g58760.1  
AT4G18810.1 Orysa4|Os02g13970.1  
AT4G29905.1,AT5G57123.1,AT5G10695.1 Orysa4|Os06g44980.1  
Orysa4|Os04g51680.1,Orysa4|Os08g13400.1  
AT2G45300.1,AT1G48860.1 Orysa4|Os06g04280.1  
AT4G02100.1,AT3G62570.1,AT1G02650.1,AT2G47440.1 Orysa4|Os07g49000.1,Orysa4|Os03g19200.1  
AT1G71310.1 Orysa4|Os01g65560.1  
AT1G19600.1 Orysa4|Os01g01620.1  
AT1G50140.1 Orysa4|Os06g12160.1,Orysa4|Os02g51400.1  
AT4G02480.1,AT1G02890.1 Orysa4|Os11g43970.1  
AT3G19740.1  
AT4G24860.1  
Orysa4|Os03g22420.1,Orysa4|Os07g47530.1  
AT2G44860.1 Orysa4|Os07g19190.1,Orysa4|Os01g33050.1  
AT5G01460.1,AT3G08930.2 Orysa4|Os06g03760.1  
AT3G51940.1,AT5G03990.1 Orysa4|Os01g58700.1,Orysa4|Os11g04510.1,Orysa4|Os12g04280.1  
AT4G11780.1,AT4G00770.1 Orysa4|Os10g38020.1,Orysa4|Os04g48360.1  
AT5G58100.1 Orysa4|Os02g26984.1  
Orysa4|Os03g37320.1  
AT1G11930.1 Orysa4|Os05g05740.1  
AT4G26860.1  
AT3G27610.1,AT2G01220.2 Orysa4|Os01g49670.1  
AT2G20510.1,AT2G36070.1 Orysa4|Os07g22700.1  
AT1G77590.1 Orysa4|Os12g07110.1  
AT1G64400.1,AT4G23850.1,AT4G11030.1 Orysa4|Os01g46750.1,Orysa4|Os01g48910.1  
AT2G47240.1 Orysa4|Os05g04170.1

AT2G04350.1 Orysa4|Os05g25310.1  
Orysa4|Os11g06880.1  
AT5G24655.1,AT3G49570.1,AT3G49580.1,AT5G24660.1 Orysa4|Os02g03710.1  
Orysa4|Os10g36610.1,Orysa4|Os10g36580.1  
AT5G24450.1,AT3G49410.1 Orysa4|Os01g34430.1  
Orysa4|Os01g34420.1  
AT5G14460.1 Orysa4|Os05g01750.1  
AT2G28540.1,AT3G45630.1,AT5G60170.1 Orysa4|Os12g01190.1,Orysa4|Os11g01190.1  
Orysa4|Os01g11130.1  
AT1G68310.1,AT3G09380.1 Orysa4|Os03g56410.1  
AT3G13120.1 Orysa4|Os03g10060.1  
AT4G21540.1 Orysa4|Os01g57350.1,Orysa4|Os07g37580.1  
AT1G04070.1,AT5G43970.1 Orysa4|Os02g29400.1,Orysa4|Os02g03880.1  
Orysa4|Os11g13400.1  
AT3G58180.1 Orysa4|Os12g06620.1  
AT2G33220.1,AT1G04630.1 Orysa4|Os03g09210.1  
AT4G14540.1 Orysa4|Os07g41580.1  
AT3G53340.1,AT2G37060.1 Orysa4|Os01g61810.1  
AT2G47810.1 Orysa4|Os01g70890.1  
AT5G47670.1 Orysa4|Os02g49370.1  
AT5G47640.1  
AT2G38880.1  
AT1G09030.1  
AT1G21970.1  
Orysa4|Os08g07740.1  
Orysa4|Os05g38820.1  
Orysa4|Os06g17480.1  
AT5G10890.1,AT4G31805.1  
Orysa4|Os06g08520.1,Orysa4|Os02g08470.1,Orysa4|Os02g55190.1,Orysa4|Os06g43990.1  
AT3G09730.1  
AT5G61670.1 Orysa4|Os02g43500.1  
AT5G06130.2  
AT5G09650.1 Orysa4|Os02g52940.1  
AT2G24820.1 Orysa4|Os02g54980.1  
AT5G63440.2 Orysa4|Os07g19470.1  
AT1G22700.1 Orysa4|Os10g32300.1  
Orysa4|Os08g25890.1  
AT3G59970.3,AT2G44160.1 Orysa4|Os03g60090.1  
AT5G06350.1,AT5G27010.1 Orysa4|Os04g39220.1  
AT4G04680.1  
AT5G44740.2 Orysa4|Os01g55300.1  
AT3G45600.1,AT5G60220.1 Orysa4|Os05g03140.1  
AT2G19580.1 Orysa4|Os06g37510.1,Orysa4|Os02g12750.1  
AT2G23810.1,AT4G30430.1,AT4G28050.1 Orysa4|Os09g25760.1,Orysa4|Os06g44310.1  
AT5G57810.1  
AT5G46700.1  
AT2G03840.1  
AT1G18520.1  
AT5G23030.1  
Orysa4|Os03g63620.1,Orysa4|Os12g14580.1,Orysa4|Os03g63600.1  
Orysa4|Os08g16050.1  
Orysa4|Os02g49630.1  
AT3G20630.1 Orysa4|Os01g08200.1  
AT3G44326.1,AT2G27310.1,AT2G36090.1  
Orysa4|Os12g06030.1,Orysa4|Os02g33240.1,Orysa4|Os11g05660.1,Orysa4|Os04g33820.1  
AT1G05180.1,AT2G32410.1 Orysa4|Os03g60550.1  
AT3G25880.1  
AT3G55220.1,AT3G55200.1 Orysa4|Os02g04480.1  
AT3G47610.1 Orysa4|Os09g24660.1  
AT5G55760.1 Orysa4|Os04g20270.1  
AT3G57650.1 Orysa4|Os11g41900.1  
AT1G51260.1  
AT5G60700.1 Orysa4|Os02g56260.1  
Orysa4|Os09g26440.1,Orysa4|Os12g08300.1  
AT5G13200.1 Orysa4|Os12g29400.1  
AT2G22475.1,AT4G40100.1 Orysa4|Os06g11430.1  
AT5G23370.1,AT5G23350.1,AT5G08350.1,AT5G23360.1  
Orysa4|Os04g44500.1,Orysa4|Os04g44510.1,Orysa4|Os02g42430.1,Orysa4|Os02g42440.1  
AT1G28200.1 Orysa4|Os03g08860.1  
Orysa4|Os09g29120.1  
Orysa4|Os03g52670.1  
Orysa4|Os07g42890.1  
AT1G65650.1 Orysa4|Os02g57630.1  
AT5G16310.1  
Orysa4|Os02g08370.1  
AT4G17510.1 Orysa4|Os02g43760.1,Orysa4|Os04g46190.1  
Orysa4|Os04g57190.1  
AT3G54860.1 Orysa4|Os04g14654.1  
AT3G16310.1 Orysa4|Os01g10350.1  
Orysa4|Os05g44380.1  
AT1G24050.1 Orysa4|Os02g50830.1  
AT2G24500.1,AT4G31420.2 Orysa4|Os06g47840.1



AT2G39080.1 Orysa4|Os01g26920.1,Orysa4|Os01g26970.1,Orysa4|Os01g26852.1  
AT5G47680.1 Orysa4|Os02g49360.1  
AT1G29830.1,AT1G29820.1 Orysa4|Os01g47460.1  
AT2G42950.1  
Orysa4|Os01g41720.1  
AT3G61480.1,AT5G28350.1 Orysa4|Os02g54500.1  
AT5G28440.1  
AT3G12630.1 Orysa4|Os09g31200.1,Orysa4|Os08g39450.1  
AT1G51200.1 Orysa4|Os06g41010.1  
AT4G12040.1,AT2G36320.1,AT1G12440.1,AT2G27580.1,AT3G52800.1  
Orysa4|Os02g32840.1,Orysa4|Os01g56040.1  
AT4G22820.1  
Orysa4|Os05g23470.1  
Orysa4|Os07g07400.1  
Orysa4|Os03g57920.1,Orysa4|Os08g33880.1,Orysa4|Os03g57900.1,Orysa4|Os07g07350.1,Orysa4|Os03  
g57890.1  
Orysa4|Os01g51990.1,Orysa4|Os01g52030.1  
AT4G38225.3 Orysa4|Os03g03670.1  
AT1G55460.1 Orysa4|Os03g37330.1  
AT5G51795.1  
AT4G13750.1 Orysa4|Os03g58910.1  
AT1G78910.1,AT3G19440.1 Orysa4|Os09g01620.1  
Orysa4|Os09g32560.1  
AT2G18100.1,AT4G36210.1 Orysa4|Os03g02170.1,Orysa4|Os10g36830.1  
AT1G67660.1 Orysa4|Os04g40900.1,Orysa4|Os08g13890.1  
AT1G13810.1  
AT1G02820.1,AT4G02380.1 Orysa4|Os05g29930.1,Orysa4|Os01g21250.1  
AT4G15910.1  
AT3G16785.1 Orysa4|Os05g29050.1  
AT3G05630.1  
Orysa4|Os01g20860.1  
AT1G32130.1 Orysa4|Os01g05420.1  
AT4G19000.1  
AT3G48820.1 Orysa4|Os02g02620.1  
AT1G08660.1 Orysa4|Os11g36420.1  
AT1G44750.1,AT4G08700.1 Orysa4|Os04g49739.1,Orysa4|Os02g46380.1  
AT2G24220.1 Orysa4|Os09g38510.1  
AT1G30840.1 Orysa4|Os01g48800.1,Orysa4|Os05g48300.1,Orysa4|Os01g31940.1  
AT1G75470.1,AT1G19770.1,AT1G47603.1,AT4G18197.1,AT1G57980.1,AT1G57943.1,AT1G57990.1,AT1G09860.1  
AT5G41160.1  
AT4G18205.1,AT4G18195.1,AT4G18210.1,AT4G18220.1  
AT4G18190.1  
Orysa4|Os09g37640.1,Orysa4|Os04g49757.1,Orysa4|Os04g49748.1  
Orysa4|Os01g11820.1  
AT2G20060.1 Orysa4|Os11g37510.1  
Orysa4|Os12g30490.1  
AT1G48605.1,AT3G18030.1 Orysa4|Os06g09910.1  
AT5G50210.1 Orysa4|Os12g19304.1  
AT1G56420.1 Orysa4|Os12g37390.1  
AT1G12530.1 Orysa4|Os03g12720.1  
AT1G73650.3,AT1G18180.1 Orysa4|Os03g50070.1  
AT5G07370.1,AT5G61760.1 Orysa4|Os02g32370.1  
Orysa4|Os06g42460.1  
AT4G05000.1,AT4G21560.1 Orysa4|Os01g57260.1  
AT5G42890.1 Orysa4|Os02g52720.1  
Orysa4|Os01g25500.1,Orysa4|Os06g10890.1  
AT5G48840.1 Orysa4|Os03g63490.1  
AT1G56310.1 Orysa4|Os05g28860.1  
AT5G35730.1 Orysa4|Os12g40340.1  
AT2G32295.1  
AT4G14385.1 Orysa4|Os01g13250.1,Orysa4|Os12g20310.1  
AT1G49880.1 Orysa4|Os03g10850.1  
AT4G23540.1 Orysa4|Os01g72780.1  
AT2G34357.1 Orysa4|Os02g54110.1  
AT4G26530.1,AT4G26520.1 Orysa4|Os06g40640.1  
AT2G01140.1 Orysa4|Os01g02880.1  
AT3G52930.1,AT5G03690.1,AT2G36460.1 Orysa4|Os10g08022.1,Orysa4|Os05g33380.1,Orysa4|Os01g67860.1  
Orysa4|Os08g02700.1  
Orysa4|Os09g02540.1  
AT2G37690.1 Orysa4|Os01g10280.1  
AT2G05140.1  
AT5G55220.1 Orysa4|Os06g20320.1  
AT1G76405.2,AT1G20816.1 Orysa4|Os02g58550.1  
AT2G27490.1 Orysa4|Os01g25880.1  
AT2G31940.1 Orysa4|Os09g27330.1  
AT5G19875.1  
Orysa4|Os02g53510.1,Orysa4|Os06g10510.1  
AT5G41760.1 Orysa4|Os06g33210.1  
AT4G35335.1 Orysa4|Os07g38610.1  
AT4G38260.1 Orysa4|Os04g47680.1,Orysa4|Os09g15480.1  
AT1G20740.1,AT1G20680.1  
AT3G57450.1 Orysa4|Os07g08830.1

Orysa4|Os10g28170.1  
AT2G26500.1 Orysa4|Os03g55720.1  
AT4G39235.1,AT3G05570.1 Orysa4|Os08g10400.1  
AT2G21640.1  
Orysa4|Os03g53390.1  
AT1G47710.1,AT3G45220.1,AT2G26390.1 Orysa4|Os03g41438.1  
AT2G35580.1,AT2G14540.1,AT1G62170.1,AT2G25240.1,AT1G64030.1  
Orysa4|Os11g12520.1,Orysa4|Os11g12420.1,Orysa4|Os11g13540.1,Orysa4|Os11g12460.1,Orysa4|Os11  
g13530.1,Orysa4|Os11g12410.1  
Orysa4|Os11g12400.1,Orysa4|Os11g13560.1,Orysa4|Os01g56010.1,Orysa4|Os01g16200.1,Orysa4|Os03  
g41419.1,Orysa4|Os11g12390.1  
Orysa4|Os04g45120.1,Orysa4|Os04g45110.1,Orysa4|Os05g43590.1  
Orysa4|Os11g11500.1  
Orysa4|Os11g37110.1  
AT5G15770.1 Orysa4|Os02g48650.1,Orysa4|Os09g31310.1  
AT5G60620.1 Orysa4|Os07g34730.1  
Orysa4|Os02g24340.1  
AT4G10180.1 Orysa4|Os01g01484.1  
Orysa4|Os01g29820.1  
AT5G58110.1 Orysa4|Os06g49030.1,Orysa4|Os02g04650.1  
AT1G69190.1,AT4G30000.1 Orysa4|Os07g42632.1  
AT2G03870.1 Orysa4|Os08g08040.1  
AT3G14080.1 Orysa4|Os04g36810.1  
AT1G19120.1  
AT2G31725.1,AT1G05730.1 Orysa4|Os11g14990.1  
AT1G05740.1  
AT2G43720.1  
AT3G21865.1 Orysa4|Os04g53690.1  
Orysa4|Os04g57680.1  
AT2G01620.1 Orysa4|Os08g33140.1  
AT3G26000.1 Orysa4|Os04g40910.1  
AT3G27290.1  
AT3G12590.1 Orysa4|Os01g74310.1  
AT3G08950.1 Orysa4|Os02g06480.1  
AT1G80520.1,AT1G15760.1 Orysa4|Os04g55120.1  
AT2G12462.1  
Orysa4|Os06g43770.1  
AT1G25350.1 Orysa4|Os05g08990.1,Orysa4|Os01g09000.1  
AT5G19720.1  
AT5G58410.1 Orysa4|Os01g74610.1  
AT3G61140.1 Orysa4|Os03g02540.1  
AT3G12850.1  
AT5G51340.1 Orysa4|Os04g28010.1  
AT1G16010.1,AT1G80900.1 Orysa4|Os06g44150.1  
AT3G58970.1,AT4G28580.1 Orysa4|Os10g39790.1  
AT5G64560.1,AT5G09690.2 Orysa4|Os03g53110.1  
AT3G19640.1 Orysa4|Os01g68040.1,Orysa4|Os01g64890.1  
AT2G03620.1  
AT5G09710.1  
AT5G09720.1  
Orysa4|Os04g42280.1  
Orysa4|Os03g04480.1  
AT3G01860.1,AT5G40860.1,AT3G27210.1 Orysa4|Os01g69100.1  
Orysa4|Os04g31110.1  
AT1G72550.1 Orysa4|Os05g48510.1  
AT5G58250.1 Orysa4|Os03g21370.1  
AT2G41770.1,AT3G57420.1 Orysa4|Os05g32500.1  
Orysa4|Os07g46300.1  
AT1G47720.1 Orysa4|Os03g43420.1  
AT1G19740.1,AT1G75460.1 Orysa4|Os07g32560.1  
Orysa4|Os03g29540.1  
AT5G35220.1 Orysa4|Os03g57840.1  
AT5G46790.1,AT4G17870.1 Orysa4|Os10g42280.1  
AT5G05440.1,AT2G38310.1,AT2G40330.1 Orysa4|Os05g39580.1,Orysa4|Os01g61210.1,Orysa4|Os03g18600.1  
AT2G26040.1 Orysa4|Os02g13330.1,Orysa4|Os06g36670.1  
AT5G53160.2 Orysa4|Os02g15640.1,Orysa4|Os05g12260.1  
AT5G45860.1,AT4G18620.1,AT5G45870.1  
AT1G73000.1  
AT4G27920.1  
AT1G01360.1,AT4G01026.1  
Orysa4|Os06g33690.1,Orysa4|Os06g33640.1  
Orysa4|Os06g33480.1  
AT4G25120.1 Orysa4|Os07g30980.1  
AT2G36680.1,AT3G53120.1 Orysa4|Os03g08770.1,Orysa4|Os03g37580.1  
AT1G61620.1 Orysa4|Os03g17170.1  
AT4G11120.1 Orysa4|Os08g30884.1  
AT2G18770.1,AT5G05670.1 Orysa4|Os08g41250.1  
Orysa4|Os06g27870.1  
AT4G31040.1 Orysa4|Os08g12780.1  
AT1G06950.1 Orysa4|Os10g35010.1  
Orysa4|Os10g35030.1  
AT1G30380.1 Orysa4|Os07g05480.1

AT5G46240.1,AT4G18290.1 Orysa4|Os02g14840.1  
AT3G02850.1,AT5G37500.1 Orysa4|Os06g14030.1  
AT4G32650.1 Orysa4|Os01g52070.1,Orysa4|Os06g14310.1  
AT2G26650.1 Orysa4|Os01g45990.1  
AT4G22200.1 Orysa4|Os05g35410.1  
AT2G25600.1,AT4G32500.1  
Orysa4|Os01g11250.1  
Orysa4|Os01g55200.1  
Orysa4|Os04g36740.1  
Orysa4|Os04g02720.1  
Orysa4|Os03g28120.1  
AT5G42320.1 Orysa4|Os02g02710.1  
AT3G17910.1 Orysa4|Os03g10360.1  
AT1G48510.1  
AT2G30570.1 Orysa4|Os01g56680.1,Orysa4|Os05g43310.1  
AT3G19900.1 Orysa4|Os02g58310.1  
AT5G43430.1 Orysa4|Os04g10400.1  
AT1G10840.1 Orysa4|Os04g30780.1  
AT4G24750.1 Orysa4|Os02g38240.1  
AT3G10350.1 Orysa4|Os02g51100.1  
AT5G60730.1  
AT1G74530.3 Orysa4|Os08g07430.1  
AT4G21700.1 Orysa4|Os05g48370.1,Orysa4|Os01g48620.1,Orysa4|Os01g48640.1,Orysa4|Os01g48660.1  
Orysa4|Os01g48610.1  
AT3G13000.2 Orysa4|Os06g49060.1  
AT5G66600.1 Orysa4|Os03g55890.1,Orysa4|Os07g03140.1  
AT5G60720.1 Orysa4|Os03g64230.1  
AT3G12540.1,AT2G39690.1 Orysa4|Os01g05480.1  
AT5G47380.1 Orysa4|Os10g41040.1  
AT1G16750.1  
AT3G18900.1  
AT2G23700.1  
Orysa4|Os02g05900.1,Orysa4|Os06g47770.1  
Orysa4|Os03g13130.1  
Orysa4|Os08g40420.1,Orysa4|Os09g32010.1  
AT1G66080.1 Orysa4|Os03g13450.1  
AT5G61500.1 Orysa4|Os01g10290.1  
Orysa4|Os10g41110.1  
AT3G17810.1 Orysa4|Os02g50350.1  
AT1G09815.1 Orysa4|Os08g43080.1,Orysa4|Os09g34850.1  
Orysa4|Os08g06620.1  
AT1G73430.1 Orysa4|Os08g34970.1  
AT4G22340.3,AT1G62430.1 Orysa4|Os10g17990.1,Orysa4|Os01g55360.1  
AT4G26770.1  
AT4G34710.1,AT2G16500.1 Orysa4|Os06g04070.1  
Orysa4|Os08g33620.1  
Orysa4|Os04g01690.1  
ATCG00470.1 Orysa4|Os12g19430.1,Orysa4|Os01g58000.1  
AT4G21750.1,AT4G04890.1 Orysa4|Os04g53540.1,Orysa4|Os08g08820.1,Orysa4|Os08g04190.1  
AT5G46880.1,AT4G17710.1 Orysa4|Os10g42490.1  
AT3G61150.1,AT4G00730.1 Orysa4|Os04g48070.1,Orysa4|Os02g45250.1  
AT2G32370.1,AT1G05230.1  
AT5G17320.1,AT1G34650.1,AT3G03260.1  
AT1G79840.1  
AT5G07260.1  
AT4G25530.1,AT5G52170.1  
Orysa4|Os07g47130.1  
Orysa4|Os01g57890.1  
Orysa4|Os07g24350.1  
Orysa4|Os07g24330.1  
AT2G44040.1,AT3G59890.1 Orysa4|Os03g14120.1,Orysa4|Os02g24020.1  
AT1G61780.1 Orysa4|Os08g09180.1  
AT3G29170.1 Orysa4|Os11g03760.1,Orysa4|Os12g03500.1  
AT5G40660.1 Orysa4|Os07g44940.1  
AT5G06120.1 Orysa4|Os03g42050.1  
AT2G39020.1,AT2G39030.1 Orysa4|Os03g05710.1  
AT4G36195.1,AT4G36190.1 Orysa4|Os10g36780.1,Orysa4|Os10g36760.1  
AT2G18080.1  
AT4G17170.1 Orysa4|Os02g37420.1  
AT3G54840.1 Orysa4|Os03g05740.1,Orysa4|Os10g30520.1  
AT1G49300.1,AT3G18820.1 Orysa4|Os05g44050.1  
AT5G60860.1,AT3G15060.1 Orysa4|Os05g48980.1,Orysa4|Os09g15790.1  
AT1G07410.1,AT3G46830.1,AT5G59150.1 Orysa4|Os03g60870.1  
AT3G09910.1,AT5G03530.1,AT1G43890.1 Orysa4|Os03g05280.1,Orysa4|Os10g31830.1  
AT1G52280.1,AT3G16100.1 Orysa4|Os01g12730.1  
AT5G59840.1,AT3G46060.1,AT3G53610.1 Orysa4|Os03g60530.1,Orysa4|Os07g13530.1,Orysa4|Os05g38630.1  
AT2G31680.1,AT2G43130.1,AT1G05810.1 Orysa4|Os08g41340.1  
AT1G09630.1 Orysa4|Os05g01480.1  
AT4G39990.1,AT5G65270.1 Orysa4|Os10g23100.1  
AT4G19640.1,AT5G45130.1 Orysa4|Os12g43550.1,Orysa4|Os03g46390.1  
AT1G01200.1 Orysa4|Os06g50060.1,Orysa4|Os09g35860.1  
AT4G18800.1,AT5G45750.1 Orysa4|Os06g35814.1

AT2G44610.1 Orysa4|Os07g31370.1  
AT5G47960.1 Orysa4|Os09g10940.1  
AT4G09720.1 Orysa4|Os01g51700.1  
AT4G17160.1  
AT4G35860.1  
AT5G46025.1,AT4G18430.1,AT1G28550.1  
AT2G33870.1  
AT4G03156.1  
AT1G18200.1  
AT5G03520.1,AT3G09900.1  
AT3G07410.1  
AT4G07524.1  
AT1G16920.1  
AT1G73640.1  
AT1G06400.1  
AT2G22290.1,AT4G39890.1  
AT5G64990.1  
AT5G10260.1  
AT3G12160.1  
AT2G21880.1  
AT1G22740.1  
AT5G39620.1  
Orysa4|Os10g14150.1  
Orysa4|Os04g39440.1  
Orysa4|Os02g21710.1  
Orysa4|Os01g47730.1  
Orysa4|Os05g20050.1  
Orysa4|Os06g47260.1  
Orysa4|Os05g27530.1  
Orysa4|Os03g09140.1  
AT4G23820.1,AT5G41870.1 Orysa4|Os02g15690.1,Orysa4|Os05g50960.1  
AT3G62110.1 Orysa4|Os03g61800.1,Orysa4|Os07g14160.1  
AT3G61490.1,AT3G48950.1,AT4G23500.1,AT2G23900.1 Orysa4|Os03g03350.1  
AT3G16850.1,AT5G49215.1,AT3G06770.2 Orysa4|Os12g36810.1,Orysa4|Os11g43750.1  
AT4G33440.1 Orysa4|Os08g01600.1  
AT3G42950.1,AT1G19170.1 Orysa4|Os09g26800.1  
Orysa4|Os01g43160.1  
Orysa4|Os02g54030.1  
AT5G62790.1 Orysa4|Os01g01710.1  
AT3G52630.1,AT4G18590.1 Orysa4|Os01g14980.1  
AT3G16190.1 Orysa4|Os02g17620.1,Orysa4|Os02g17640.1  
AT1G50940.1 Orysa4|Os03g61920.1  
AT5G64816.1 Orysa4|Os03g08710.1  
AT1G75140.1,AT1G19370.1 Orysa4|Os06g02480.1  
AT1G64520.1 Orysa4|Os07g25420.1  
AT5G42040.1  
AT1G53450.1,AT3G14830.1 Orysa4|Os05g45400.1,Orysa4|Os01g52920.1  
Orysa4|Os06g05950.1  
AT4G28320.1,AT2G20680.1 Orysa4|Os01g54300.1  
AT5G01930.1 Orysa4|Os05g25480.1  
AT5G66460.1 Orysa4|Os01g47400.1  
AT3G30540.1,AT3G10890.1,AT3G10900.1  
AT1G02310.1  
Orysa4|Os11g02600.1,Orysa4|Os12g02520.1  
Orysa4|Os03g61270.1,Orysa4|Os02g52800.1  
AT5G62720.1,AT3G47980.1 Orysa4|Os03g48030.1  
AT1G04635.1 Orysa4|Os04g22800.1,Orysa4|Os04g22870.1  
AT2G11890.1 Orysa4|Os08g20400.1  
AT1G31660.1 Orysa4|Os09g18320.1  
AT4G39160.1 Orysa4|Os03g62379.1  
Orysa4|Os03g62388.1  
AT4G33600.1,AT4G33590.1 Orysa4|Os09g29160.1  
AT3G13420.1,AT1G55535.1 Orysa4|Os07g12220.1  
AT3G09450.1,AT2G28780.1 Orysa4|Os12g01020.1,Orysa4|Os11g01030.1  
AT5G13570.1 Orysa4|Os02g56210.1  
AT2G38530.1,AT5G59320.1,AT3G51590.1,AT3G51600.1,AT5G59310.1,AT2G38540.1  
Orysa4|Os11g02379.1,Orysa4|Os12g02340.1,Orysa4|Os11g02350.1,Orysa4|Os12g02300.1,Orysa4|Os11g02400.1,Orysa4|Os12g02320.1,Orysa4|Os12g02330.1  
AT4G33355.1  
Orysa4|Os02g24720.1  
Orysa4|Os07g27940.1  
Orysa4|Os06g06340.1  
Orysa4|Os05g40010.1,Orysa4|Os01g60740.1  
Orysa4|Os08g03690.1  
Orysa4|Os03g59380.1  
AT2G42070.1 Orysa4|Os09g38040.1  
AT5G25940.1 Orysa4|Os06g04990.1,Orysa4|Os06g05020.1,Orysa4|Os06g05000.1,Orysa4|Os06g04950.1  
AT5G53450.1 Orysa4|Os01g46720.1  
AT3G22530.1,AT4G14830.1 Orysa4|Os03g06390.1,Orysa4|Os07g07670.1  
AT4G35760.1 Orysa4|Os03g03949.1  
AT4G14600.1,AT1G29060.1 Orysa4|Os03g08870.1,Orysa4|Os07g38990.1  
AT5G07020.1 Orysa4|Os02g35090.1

AT1G02070.1,AT3G60520.1 Orysa4|Os02g44090.1,Orysa4|Os04g46600.1  
Orysa4|Os03g08840.1,Orysa4|Os04g37700.1  
AT3G04820.1 Orysa4|Os05g43370.1,Orysa4|Os01g56620.1  
AT2G35520.2,AT1G32210.1 Orysa4|Os04g32550.1  
AT5G51600.1 Orysa4|Os05g47970.1,Orysa4|Os01g49200.1  
AT1G27920.1 Orysa4|Os08g41890.1  
AT4G26760.1,AT5G55230.1 Orysa4|Os06g40840.1  
AT3G60840.1  
AT5G62250.1  
Orysa4|Os02g03400.1  
Orysa4|Os05g45980.1  
Orysa4|Os05g33890.1  
Orysa4|Os06g20370.1,Orysa4|Os02g48830.1  
AT1G71750.1 Orysa4|Os05g08950.1  
AT4G34270.1 Orysa4|Os03g55270.1  
AT3G27325.1 Orysa4|Os09g09360.1  
AT5G27380.1 Orysa4|Os11g42350.1,Orysa4|Os12g34380.1  
Orysa4|Os12g16200.1  
AT2G31945.1,AT1G05575.1 Orysa4|Os06g10530.1,Orysa4|Os02g53410.1  
Orysa4|Os09g27410.1  
AT3G03420.1 Orysa4|Os04g40650.1,Orysa4|Os12g19090.1  
AT3G52090.1 Orysa4|Os07g07610.1  
AT1G22800.1 Orysa4|Os12g10200.1  
AT3G13870.1,AT1G72960.1 Orysa4|Os01g39310.1  
AT5G45160.1  
Orysa4|Os12g41170.1  
AT5G61770.3 Orysa4|Os03g22350.1  
AT2G02570.1 Orysa4|Os08g01840.1  
AT3G20650.1 Orysa4|Os08g08200.1  
AT2G13440.1 Orysa4|Os01g72980.1  
AT3G52610.1 Orysa4|Os01g64256.1  
AT4G20850.1 Orysa4|Os02g44520.1  
AT3G53140.1 Orysa4|Os02g57760.1  
AT5G54160.1 Orysa4|Os08g06100.1  
AT5G53810.1,AT1G77530.1,AT1G21130.1,AT1G21110.1,AT1G21120.1,AT1G63140.2,AT1G77520.1,AT1G76790.1,AT1G21100.1,AT5G37170.1  
AT1G62900.1,AT1G51990.1  
AT1G33030.1  
Orysa4|Os01g52420.1  
Orysa4|Os04g09654.1,Orysa4|Os04g01470.1,Orysa4|Os12g09770.1,Orysa4|Os12g10140.1  
Orysa4|Os12g10170.1,Orysa4|Os12g13800.1  
AT2G19940.1 Orysa4|Os10g35170.1,Orysa4|Os03g42110.1  
AT1G51650.1 Orysa4|Os08g15170.1  
AT3G13330.1 Orysa4|Os06g19730.1  
AT5G23300.1 Orysa4|Os04g57950.1  
AT5G23710.1 Orysa4|Os06g40110.1  
AT4G00755.1 Orysa4|Os03g02560.1,Orysa4|Os03g64360.1  
AT3G03305.1 Orysa4|Os07g17280.1,Orysa4|Os01g66920.1  
Orysa4|Os03g15430.1  
AT2G25050.1,AT1G31810.1,AT3G32400.1,AT5G58160.1  
Orysa4|Os10g02980.1,Orysa4|Os04g17130.1,Orysa4|Os04g17120.1,Orysa4|Os08g17820.1,Orysa4|Os02g55150.1,Orysa4|Os07g40510.1  
AT5G07780.1,AT1G42980.1,AT5G07760.1,AT5G07650.1  
AT5G07770.1  
Orysa4|Os03g31446.1,Orysa4|Os06g08540.1,Orysa4|Os07g40520.1  
Orysa4|Os02g55170.1  
Orysa4|Os03g31460.1  
Orysa4|Os03g48190.1  
AT4G01560.1 Orysa4|Os06g04600.1  
AT2G26680.1 Orysa4|Os03g36910.1  
AT4G26900.1 Orysa4|Os03g15120.1  
Orysa4|Os03g54230.1  
AT5G59220.1,AT1G07430.1,AT2G29380.1,AT3G11410.1  
Orysa4|Os03g16170.1,Orysa4|Os05g38290.1,Orysa4|Os01g62760.1  
AT1G72770.1,AT1G17550.1 Orysa4|Os01g40094.1  
AT5G51760.1  
AT5G57050.1,AT4G26080.1  
AT1G17545.1  
Orysa4|Os05g49730.1,Orysa4|Os09g15670.1,Orysa4|Os01g46760.1  
Orysa4|Os04g08560.1  
Orysa4|Os05g46040.1  
AT5G05000.1 Orysa4|Os03g13730.1  
AT2G16640.1,AT3G16620.1 Orysa4|Os10g40110.1  
AT4G02510.1 Orysa4|Os05g05950.1  
AT5G20300.1 Orysa4|Os12g09570.1  
AT1G02280.1  
AT4G15810.1  
AT4G02482.1  
Orysa4|Os03g61890.1  
Orysa4|Os01g25450.1  
AT5G09620.1,AT5G64430.1 Orysa4|Os02g56480.1  
AT5G49920.1 Orysa4|Os07g37040.1,Orysa4|Os05g35260.1,Orysa4|Os02g52790.1

AT3G18230.1,AT2G01190.1 Orysa4|Os01g04650.1  
AT1G70640.1 Orysa4|Os11g25800.1,Orysa4|Os11g25780.1  
AT1G25300.1  
AT4G05150.1  
AT5G63130.1,AT3G48240.1  
AT3G26510.5  
AT2G40740.1 Orysa4|Os05g25700.1  
AT4G26640.2 Orysa4|Os07g39480.1  
AT5G01900.1,AT1G66600.1,AT1G66560.1,AT1G66550.1,AT1G80590.1,AT5G22570.1,AT5G24110.1  
Orysa4|Os05g25770.1,Orysa4|Os01g60640.1,Orysa4|Os05g40080.1,Orysa4|Os06g06360.1,Orysa4|Os03  
g21710.1,Orysa4|Os05g40060.1,Orysa4|Os07g48260.1  
AT5G13080.1 Orysa4|Os11g29870.1  
AT1G30650.1,AT2G34830.1 Orysa4|Os02g47060.1,Orysa4|Os04g50920.1  
AT2G46400.1 Orysa4|Os08g29660.1,Orysa4|Os01g46800.1,Orysa4|Os05g49620.1,Orysa4|Os09g16510.1  
AT5G52830.1 Orysa4|Os02g16540.1,Orysa4|Os06g30860.1  
AT2G03340.1,AT1G13960.1 Orysa4|Os12g32250.1  
AT1G29860.1,AT4G18170.1,AT5G49520.1 Orysa4|Os05g49100.1,Orysa4|Os01g47560.1,Orysa4|Os01g43650.1  
AT5G56270.1 Orysa4|Os08g38990.1,Orysa4|Os09g30400.1  
AT5G26170.1 Orysa4|Os05g09020.1,Orysa4|Os05g46020.1,Orysa4|Os01g51690.1,Orysa4|Os01g09100.1  
AT2G38470.1 Orysa4|Os05g27730.1  
AT2G30590.1 Orysa4|Os03g53050.1,Orysa4|Os12g40570.1  
AT3G58710.1,AT1G29280.1 Orysa4|Os01g54600.1  
AT5G43290.1 Orysa4|Os01g74140.1  
AT2G44745.1 Orysa4|Os04g46060.1  
AT2G24570.1,AT4G31550.1 Orysa4|Os04g21950.1  
AT1G64000.1,AT5G41570.1 Orysa4|Os01g53260.1  
AT1G69310.1 Orysa4|Os03g55080.1,Orysa4|Os07g02060.1  
AT2G04880.1  
AT4G23810.1,AT4G11070.1  
AT2G40750.1,AT3G56400.1  
AT3G01970.1  
AT5G45270.1  
AT4G23550.1,AT4G01250.1  
AT3G01080.1  
AT2G37260.1,AT1G55600.1  
AT3G62340.1,AT2G47260.1  
AT5G46350.1  
AT4G26440.1  
AT5G64810.1  
AT2G21900.1  
AT2G30250.1  
AT5G07100.1  
AT3G04670.1,AT5G28650.1  
AT4G24240.1  
AT2G46130.1  
Orysa4|Os11g02480.1,Orysa4|Os01g60490.1,Orysa4|Os12g02420.1  
Orysa4|Os01g60520.1,Orysa4|Os01g60600.1,Orysa4|Os01g60540.1  
Orysa4|Os09g09630.1  
Orysa4|Os03g63810.1  
Orysa4|Os03g20550.1  
Orysa4|Os03g33020.1  
Orysa4|Os08g17400.1  
Orysa4|Os03g45450.1  
Orysa4|Os01g40260.1  
Orysa4|Os05g39720.1  
Orysa4|Os03g58420.1  
Orysa4|Os05g03900.1  
Orysa4|Os01g53040.1  
Orysa4|Os02g43560.1  
Orysa4|Os02g26430.1,Orysa4|Os08g13840.1,Orysa4|Os04g51560.1  
AT3G12203.1,AT3G12240.1,AT2G22990.3,AT2G22920.2,AT1G73310.1,AT1G73290.1,AT3G12220.1,AT5G36180.1,A  
T1G73280.1,AT2G23000.1,AT1G73270.1,AT5G09640.1,AT1G73300.1,AT2G23010.1,AT2G22970.1,AT3G12230.1,AT  
2G22980.1,AT3G10450.1,AT1G33540.1  
Orysa4|Os10g01134.1,Orysa4|Os10g01110.1,Orysa4|Os04g09720.1,Orysa4|Os11g27264.1  
AT2G22960.1  
Orysa4|Os06g32780.1,Orysa4|Os11g24340.1,Orysa4|Os03g52070.1,Orysa4|Os03g52040.1,Orysa4|Os03  
g52080.1,Orysa4|Os11g24510.1,Orysa4|Os12g39170.1  
Orysa4|Os11g42390.1  
Orysa4|Os11g24180.1  
Orysa4|Os11g24320.1  
Orysa4|Os11g24240.1  
Orysa4|Os11g27200.1  
AT1G79730.1 Orysa4|Os08g06070.1  
AT4G12690.1,AT2G04220.1,AT5G48270.1 Orysa4|Os01g68140.1  
AT5G28150.1,AT3G04860.1 Orysa4|Os03g59200.1  
AT5G11000.1,AT2G25200.1 Orysa4|Os06g08350.1,Orysa4|Os08g34120.1,Orysa4|Os09g24970.1  
AT2G27770.1  
Orysa4|Os05g01790.1  
Orysa4|Os02g10530.1  
Orysa4|Os03g53380.1  
Orysa4|Os07g38460.1  
AT2G21440.1 Orysa4|Os03g58720.1

AT5G54980.1 Orysa4|Os04g21320.1,Orysa4|Os02g12760.1  
AT1G17200.1  
AT3G14380.1  
AT4G39470.1 Orysa4|Os05g08930.1  
AT1G78915.1 Orysa4|Os07g18720.1  
AT2G43490.1,AT3G59570.1 Orysa4|Os01g01010.1  
AT5G16800.2,AT3G02980.1 Orysa4|Os02g46700.1  
AT5G23280.1,AT5G08330.1 Orysa4|Os02g42380.1,Orysa4|Os04g44440.1  
AT3G47620.1 Orysa4|Os06g12230.1,Orysa4|Os02g51280.1  
AT5G51910.1,AT2G45680.1 Orysa4|Os09g34950.1,Orysa4|Os08g43160.1  
AT3G27010.1 Orysa4|Os01g69980.1  
AT1G58100.1 Orysa4|Os12g07480.1,Orysa4|Os11g07460.1  
AT1G69690.1  
AT2G37000.1  
AT5G41030.1  
AT1G35560.1,AT1G72010.1  
AT3G45150.1  
Orysa4|Os01g14380.1  
AT3G10110.1,AT1G18320.1 Orysa4|Os03g18500.1  
AT4G39840.1 Orysa4|Os09g20540.1,Orysa4|Os08g31760.1  
AT2G46180.1,AT3G61570.1 Orysa4|Os08g29730.1  
AT1G22060.1 Orysa4|Os10g21940.1  
AT1G52080.1 Orysa4|Os05g09380.1  
AT2G36650.1  
Orysa4|Os01g39890.1  
AT1G27410.1 Orysa4|Os01g57440.1  
AT5G46110.1 Orysa4|Os01g13770.1,Orysa4|Os05g15160.1  
AT5G33320.1 Orysa4|Os09g12600.1  
AT1G61800.1,AT5G54800.1 Orysa4|Os08g08840.1  
AT1G43310.1  
AT4G03950.1  
AT5G17630.1  
Orysa4|Os07g33910.1,Orysa4|Os07g34006.1,Orysa4|Os07g33954.1  
AT4G27760.1,AT5G53100.1,AT5G53090.1 Orysa4|Os02g02470.1  
AT2G39370.1 Orysa4|Os05g38690.1  
Orysa4|Os05g02980.1  
Orysa4|Os03g17260.1  
AT3G50100.1,AT5G67240.1,AT5G05540.1 Orysa4|Os04g55700.1  
AT3G50090.1  
AT5G18700.1 Orysa4|Os01g15480.1  
AT1G33940.1  
AT5G40300.1,AT5G62820.1,AT2G36330.1 Orysa4|Os02g04180.1  
Orysa4|Os01g47200.1,Orysa4|Os01g45360.1  
AT1G48290.1  
Orysa4|Os11g44180.1,Orysa4|Os04g28290.1,Orysa4|Os04g48970.1,Orysa4|Os05g25080.1,Orysa4|Os04g28350.1,Orysa4|Os06g49090.1,Orysa4|Os05g18970.1,Orysa4|Os10g30240.1,Orysa4|Os08g35970.1,Orysa4|Os02g30530.1,Orysa4|Os11g15010.1,Orysa4|Os12g08490.1,Orysa4|Os05g31630.1,Orysa4|Os09g16440.1,Orysa4|Os05g37870.1,Orysa4|Os01g68990.1,Orysa4|Os02g26630.1,Orysa4|Os07g32370.1,Orysa4|Os03g20890.1,Orysa4|Os05g05540.1,Orysa4|Os08g25680.1,Orysa4|Os12g08520.1,Orysa4|Os04g17190.1,Orysa4|Os05g43400.1,Orysa4|Os08g33550.1,Orysa4|Os05g31510.1,Orysa4|Os06g13630.1,Orysa4|Os10g31350.1,Orysa4|Os07g01290.1,Orysa4|Os12g29810.1  
Orysa4|Os07g25760.1  
AT4G18300.1,AT3G02270.1,AT2G34970.1 Orysa4|Os02g56740.1  
AT4G20020.1 Orysa4|Os11g11020.1  
AT5G44780.1  
AT1G80360.1 Orysa4|Os01g08270.1  
AT4G02580.1 Orysa4|Os05g43360.1  
AT1G73720.1 Orysa4|Os01g21940.1  
AT1G15440.1 Orysa4|Os05g44320.1  
AT4G19840.1 Orysa4|Os01g06500.1  
AT4G19850.1,AT1G33920.1  
AT5G45090.1  
AT3G18524.1 Orysa4|Os05g19270.1  
AT3G29075.1 Orysa4|Os02g50980.1,Orysa4|Os07g48420.1,Orysa4|Os06g12580.1  
AT1G08770.1 Orysa4|Os03g58410.1  
AT3G13710.1,AT3G13720.1,AT1G55190.1 Orysa4|Os01g10010.1,Orysa4|Os05g11120.1  
AT2G38360.1,AT3G56110.1,AT5G05380.1,AT2G40380.1 Orysa4|Os05g39670.1,Orysa4|Os01g61170.1  
AT1G17700.1  
AT4G29658.1  
AT1G55640.1,AT5G56230.1  
AT5G01640.1  
Orysa4|Os03g53070.1  
Orysa4|Os12g01690.1  
AT1G73960.1 Orysa4|Os09g24440.1  
AT5G17440.1,AT3G03340.1 Orysa4|Os03g62640.1  
Orysa4|Os02g39300.1  
AT5G49400.1 Orysa4|Os11g09310.1  
Orysa4|Os01g01730.1  
AT5G05210.1 Orysa4|Os05g30880.1  
AT2G27750.1  
AT5G41020.1 Orysa4|Os06g19980.1  
Orysa4|Os05g11630.1

AT3G26670.1 Orysa4|Os02g31874.1  
AT1G01490.1 Orysa4|Os03g03500.1,Orysa4|Os10g38870.1  
AT3G05920.1,AT5G26690.1 Orysa4|Os03g25610.1  
AT5G52750.1  
Orysa4|Os04g57200.1  
Orysa4|Os09g09850.1  
Orysa4|Os04g56570.1  
Orysa4|Os01g14710.1,Orysa4|Os01g14700.1  
AT3G28880.1 Orysa4|Os12g39700.1,Orysa4|Os12g38460.1  
AT1G76120.1,AT1G20370.1 Orysa4|Os02g44810.1  
AT3G59410.1 Orysa4|Os04g41510.1  
AT4G12610.1 Orysa4|Os10g10990.1  
Orysa4|Os03g14720.1  
AT4G32620.1 Orysa4|Os01g08430.1  
AT1G69070.1 Orysa4|Os03g40110.1  
AT5G64910.1,AT5G10010.1 Orysa4|Os02g31960.1,Orysa4|Os04g56590.1  
AT5G67390.1 Orysa4|Os03g55400.1,Orysa4|Os03g40770.1,Orysa4|Os12g39100.1  
Orysa4|Os12g32360.1  
AT1G53320.1 Orysa4|Os01g48370.1,Orysa4|Os01g55430.1,Orysa4|Os05g43850.1  
AT1G25280.1  
Orysa4|Os12g06630.1,Orysa4|Os05g36190.1,Orysa4|Os01g64700.1,Orysa4|Os08g01290.1,Orysa4|Os04  
g59130.1  
AT2G18280.1 Orysa4|Os02g47640.1  
AT2G47900.1 Orysa4|Os07g47110.1,Orysa4|Os03g22800.1  
AT1G43640.1  
AT1G76900.1  
AT1G47270.1  
AT5G18680.1,AT3G06380.1  
AT1G61940.1  
Orysa4|Os05g48670.1  
AT5G63880.1,AT5G09260.1 Orysa4|Os02g38300.1  
AT1G80260.1,AT1G20570.1 Orysa4|Os02g32340.1  
AT5G17410.2 Orysa4|Os04g42330.1  
AT2G35690.1,AT4G16760.1 Orysa4|Os06g01390.1  
AT2G45530.1 Orysa4|Os10g34030.1  
AT1G05910.1 Orysa4|Os09g33980.1  
AT5G18670.1 Orysa4|Os03g22790.1,Orysa4|Os07g47120.1  
AT3G23920.1 Orysa4|Os03g04770.1  
AT5G45300.1 Orysa4|Os02g03690.1  
AT4G17090.1 Orysa4|Os10g41550.1  
AT4G00490.1 Orysa4|Os09g39570.1  
AT5G55700.1  
AT2G45880.1  
Orysa4|Os01g13550.1  
AT2G31260.1 Orysa4|Os03g14380.1,Orysa4|Os10g07994.1  
AT4G38400.1,AT3G45960.2,AT3G45970.1 Orysa4|Os10g39640.1,Orysa4|Os03g04020.1  
Orysa4|Os06g50960.1  
AT4G26550.1,AT5G56020.1 Orysa4|Os06g40630.1  
AT4G28340.1,AT4G28330.1,AT1G03730.1,AT4G03600.1 Orysa4|Os12g19860.1  
AT5G50175.1  
AT1G29260.1 Orysa4|Os02g14790.1  
AT4G34540.1 Orysa4|Os02g47610.1  
AT1G32100.1,AT4G13660.1 Orysa4|Os12g16220.1  
AT4G39230.1 Orysa4|Os06g27770.1  
AT1G75280.1,AT1G75290.1,AT1G19540.1,AT1G75300.1  
Orysa4|Os01g13590.1  
Orysa4|Os12g16290.1,Orysa4|Os12g16250.1  
Orysa4|Os12g16240.1  
Orysa4|Os01g13600.1,Orysa4|Os06g28550.1  
Orysa4|Os03g15360.1  
AT2G19540.1 Orysa4|Os11g03990.1  
Orysa4|Os12g03822.1  
AT4G12620.1,AT4G14700.1 Orysa4|Os06g08790.1  
AT5G26820.1 Orysa4|Os12g37530.1  
Orysa4|Os05g04120.1  
Orysa4|Os06g14170.1  
AT3G08670.1 Orysa4|Os05g40220.1  
AT3G51540.1  
Orysa4|Os05g25220.1  
AT2G40070.1 Orysa4|Os01g04880.1  
AT3G09000.1  
AT2G38160.1  
AT5G01280.1  
AT1G49350.1 Orysa4|Os05g09370.1  
AT2G28840.1 Orysa4|Os05g02130.1  
Orysa4|Os03g16780.1  
Orysa4|Os01g74320.1  
Orysa4|Os10g32780.1,Orysa4|Os11g29600.1  
AT2G47790.1 Orysa4|Os12g19590.1  
AT3G04910.1,AT5G28080.2 Orysa4|Os07g38530.1  
AT5G55560.1 Orysa4|Os07g39520.1  
AT3G48260.1 Orysa4|Os05g01780.1



AT5G58350.1,AT3G51630.1 Orysa4|Os11g02300.1,Orysa4|Os12g02250.1  
AT1G49160.2,AT3G18750.1 Orysa4|Os02g45130.1  
AT3G22420.2  
AT1G64630.1,AT5G41990.1  
Orysa4|Os07g08750.1  
Orysa4|Os11g06140.1  
AT5G38460.1 Orysa4|Os07g07010.1  
AT3G04650.1 Orysa4|Os12g40540.1  
AT4G29380.1 Orysa4|Os02g55340.1  
AT5G48120.1 Orysa4|Os07g08050.1  
AT5G36000.1,AT3G61730.1,AT3G62500.1 Orysa4|Os01g11990.1  
AT3G12080.1 Orysa4|Os11g41910.1  
AT4G12780.1,AT4G12770.1 Orysa4|Os12g36180.1,Orysa4|Os11g43950.1  
AT1G75100.1 Orysa4|Os03g10180.1  
AT4G36520.1 Orysa4|Os01g44310.1,Orysa4|Os05g50370.1  
AT1G21660.1  
AT1G30280.1  
AT1G75310.1  
Orysa4|Os02g02900.1  
AT3G48800.1,AT5G23680.1 Orysa4|Os03g63320.1  
Orysa4|Os12g29480.1  
AT2G21620.2 Orysa4|Os02g47650.1  
AT5G48630.1,AT5G48640.1 Orysa4|Os09g32680.1  
AT4G03430.1 Orysa4|Os10g35550.1  
Orysa4|Os01g15860.1  
AT2G47450.1 Orysa4|Os03g03990.1  
AT5G64570.1,AT5G09730.1 Orysa4|Os04g54810.1  
AT1G78060.1 Orysa4|Os11g19160.1,Orysa4|Os11g18730.1,Orysa4|Os11g19210.1,Orysa4|Os02g51620.1  
AT5G10560.1 Orysa4|Os04g44840.1  
AT5G09700.1  
AT1G02640.1,AT5G49360.1  
AT3G19620.1  
Orysa4|Os11g18690.1  
AT4G19610.1 Orysa4|Os04g52200.1  
AT5G05720.1  
AT3G51730.1 Orysa4|Os01g07250.1,Orysa4|Os05g26954.1  
AT5G01800.1  
AT5G27720.1 Orysa4|Os01g15310.1  
AT5G66420.2 Orysa4|Os06g27800.1  
AT3G62900.1 Orysa4|Os07g47360.1,Orysa4|Os03g22580.1  
AT4G15730.1  
AT1G02990.2  
AT4G29060.1 Orysa4|Os12g35630.1  
AT5G62530.1 Orysa4|Os05g45960.1  
Orysa4|Os06g19840.1  
AT1G70060.1,AT1G24190.1 Orysa4|Os05g01020.1,Orysa4|Os01g01960.1  
AT1G24210.1,AT5G15020.1,AT1G27240.1,AT1G10450.1,AT3G01320.1  
AT1G24200.1,AT1G59890.1  
AT1G27250.1,AT1G27220.1  
AT1G70030.1  
AT1G27280.1,AT1G27270.1,AT1G24230.1,AT1G27260.1  
AT5G35610.1  
AT3G24260.1  
AT5G15030.1  
AT1G24250.1,AT1G23810.1  
AT1G10250.1  
AT1G24220.1,AT5G15040.1  
Orysa4|Os05g51110.1  
AT4G21210.1 Orysa4|Os07g34640.1  
AT3G01200.1  
AT3G20330.1 Orysa4|Os08g15030.1  
AT5G57950.1 Orysa4|Os09g25310.1  
AT5G15680.1 Orysa4|Os02g58410.1  
AT5G35080.1 Orysa4|Os06g43710.1  
AT2G19385.1 Orysa4|Os01g40110.1  
AT2G19380.1  
AT1G60550.1 Orysa4|Os01g47350.1  
AT1G16810.1 Orysa4|Os02g49530.1  
AT3G62600.1 Orysa4|Os05g06440.1  
AT5G22060.1,AT3G44110.1 Orysa4|Os03g57340.1,Orysa4|Os03g44620.1  
Orysa4|Os12g42440.1,Orysa4|Os02g43930.1  
AT1G23360.1 Orysa4|Os04g42870.1  
AT5G57190.1,AT4G25970.1 Orysa4|Os01g72940.1  
AT3G23980.1 Orysa4|Os01g68380.1  
AT2G43560.1 Orysa4|Os08g42850.1  
AT5G12190.1 Orysa4|Os03g59710.1  
AT2G14870.1  
AT3G04500.1 Orysa4|Os08g45240.1  
Orysa4|Os02g40900.1  
AT1G43190.1 Orysa4|Os05g36120.1,Orysa4|Os01g64770.1  
Orysa4|Os06g30270.1  
AT2G20420.1 Orysa4|Os02g40830.1

AT5G26680.1 Orysa4|Os03g61820.1  
Orysa4|Os05g46270.1  
AT4G37930.1 Orysa4|Os03g52840.1  
AT4G13930.1 Orysa4|Os12g22030.1  
AT4G32520.1  
AT5G26780.3  
AT4G13890.1  
Orysa4|Os11g26860.1  
AT3G18430.1 Orysa4|Os08g34340.1  
Orysa4|Os02g55880.1  
AT2G20650.1 Orysa4|Os07g31850.1  
AT4G28370.1  
AT4G15010.1 Orysa4|Os04g44540.1  
AT5G01030.1,AT5G59020.1,AT2G29510.1 Orysa4|Os03g16070.1  
AT2G37930.1  
AT4G12570.1 Orysa4|Os09g31090.1  
AT1G77122.1 Orysa4|Os04g35760.1  
AT1G69210.1 Orysa4|Os07g06090.1  
AT4G13870.2 Orysa4|Os04g03990.1  
AT4G13885.1  
AT4G01170.1,AT1G21560.1,AT1G77270.1,AT3G07730.1 Orysa4|Os04g14410.1,Orysa4|Os04g45610.1  
Orysa4|Os05g34920.1  
AT3G08505.1 Orysa4|Os06g21390.1  
AT2G31160.1 Orysa4|Os04g43580.1,Orysa4|Os02g56610.1,Orysa4|Os02g41460.1  
AT1G07090.1 Orysa4|Os05g28040.1,Orysa4|Os05g39500.1,Orysa4|Os01g61310.1,Orysa4|Os06g46030.1  
AT3G04510.1,AT5G28490.1  
AT2G42610.1  
AT4G18610.1,AT1G78815.1  
AT1G16910.1  
AT5G58500.1  
Orysa4|Os05g27120.1,Orysa4|Os08g09660.1,Orysa4|Os08g14970.1,Orysa4|Os01g54180.1,Orysa4|Os02  
g07030.1  
Orysa4|Os07g04670.1  
AT2G46580.1 Orysa4|Os03g02450.1  
AT1G19880.1 Orysa4|Os04g56720.1  
AT2G45950.1,AT3G61415.1 Orysa4|Os03g01660.1  
AT1G24300.1,AT1G27430.1 Orysa4|Os01g69990.1  
AT3G20740.1 Orysa4|Os08g04290.1,Orysa4|Os08g04270.1  
AT5G08630.1 Orysa4|Os02g35100.1,Orysa4|Os04g35880.1  
AT4G01245.1,AT4G01270.1 Orysa4|Os08g05560.1,Orysa4|Os12g18550.1  
AT1G47750.1 Orysa4|Os03g19000.1,Orysa4|Os03g19010.1  
AT3G47430.1 Orysa4|Os04g45210.1  
AT2G23620.1,AT2G23580.1,AT2G23590.1,AT5G10300.1,AT2G23600.1,AT4G37150.1,AT2G23610.1  
Orysa4|Os01g37630.1,Orysa4|Os01g57770.1,Orysa4|Os01g37650.1,Orysa4|Os01g25360.1  
AT2G23550.1,AT2G23570.1,AT2G23560.1,AT3G50440.1  
Orysa4|Os11g30040.1,Orysa4|Os01g70850.1  
Orysa4|Os01g70830.1  
Orysa4|Os11g30030.1  
AT1G73885.1 Orysa4|Os03g50270.1  
AT5G13560.1 Orysa4|Os05g06980.1,Orysa4|Os01g06270.1  
AT2G37370.1  
Orysa4|Os03g17270.1  
AT5G40740.1 Orysa4|Os02g22370.1  
AT4G16570.1 Orysa4|Os06g01640.1  
AT3G30580.1,AT5G38790.1 Orysa4|Os08g37990.1  
AT5G52200.1 Orysa4|Os05g23610.1  
Orysa4|Os02g39030.1  
AT2G41960.1,AT3G58050.1 Orysa4|Os10g01610.1,Orysa4|Os03g12550.1  
AT5G47810.1 Orysa4|Os09g30240.1  
AT2G22480.1 Orysa4|Os09g24910.1,Orysa4|Os08g34050.1,Orysa4|Os10g26570.1  
Orysa4|Os06g11080.1  
Orysa4|Os04g39420.1  
AT2G17510.1 Orysa4|Os03g03710.1  
ATCG00430.1 Orysa4|Os06g22010.1  
Orysa4|Os10g38210.1,Orysa4|Os12g19420.1,Orysa4|Os10g21260.1,Orysa4|Os01g58030.1  
AT1G79940.1 Orysa4|Os04g24180.1  
AT4G21180.1  
AT2G42750.1 Orysa4|Os01g53020.1  
AT3G56990.1 Orysa4|Os06g03780.1  
AT5G09380.1 Orysa4|Os04g32350.1  
AT4G25180.1  
Orysa4|Os01g66580.1  
AT1G51110.1 Orysa4|Os07g28790.1  
AT5G66840.1 Orysa4|Os07g42760.1  
Orysa4|Os10g25220.1  
AT3G61790.1 Orysa4|Os02g19140.1,Orysa4|Os05g14860.1,Orysa4|Os01g13370.1  
AT5G62800.1,AT1G66630.1,AT1G66650.1,AT5G37870.1,AT5G37930.1 Orysa4|Os01g03290.1  
AT4G27880.1  
AT2G41980.1,AT3G58040.1  
AT5G53360.1  
Orysa4|Os07g46560.1,Orysa4|Os03g24040.1  
Orysa4|Os06g20610.1

Orysa4|Os01g03190.1,Orysa4|Os01g03300.1,Orysa4|Os01g03420.1  
Orysa4|Os01g03400.1  
Orysa4|Os01g03170.1  
AT5G04920.1 Orysa4|Os01g59800.1  
AT2G39340.1 Orysa4|Os01g61930.1,Orysa4|Os05g38730.1  
AT3G14120.1 Orysa4|Os11g42420.1  
AT5G52380.1 Orysa4|Os04g46920.1  
AT2G12880.1  
AT4G35520.1 Orysa4|Os09g37930.1  
AT1G05970.2 Orysa4|Os02g44890.1,Orysa4|Os09g02400.1,Orysa4|Os04g59340.1,Orysa4|Os07g15270.1  
AT1G26580.1,AT1G13880.1,AT2G03470.1 Orysa4|Os03g31230.1  
AT5G53370.1,AT3G49220.1 Orysa4|Os01g13320.1  
AT2G21610.1 Orysa4|Os01g44340.1  
AT1G53830.1,AT3G14310.1 Orysa4|Os07g47830.1,Orysa4|Os01g21034.1  
AT3G29090.1 Orysa4|Os10g26680.1  
AT5G47500.1 Orysa4|Os04g46740.1  
AT5G49180.1,AT3G05610.1,AT5G27870.1 Orysa4|Os03g18860.1  
AT5G09760.1,AT5G64640.1 Orysa4|Os01g65790.1  
AT2G36700.1,AT2G36710.1,AT1G05310.1 Orysa4|Os09g39760.1  
AT3G05620.1 Orysa4|Os01g15039.1  
AT5G55590.1 Orysa4|Os07g41650.1  
AT2G26440.1 Orysa4|Os06g09340.1  
AT4G33230.1,AT2G26450.1 Orysa4|Os08g34910.1,Orysa4|Os09g26360.1  
AT3G17060.1 Orysa4|Os03g19610.1  
AT5G19730.1 Orysa4|Os05g44600.1,Orysa4|Os01g53990.1  
AT2G47550.1,AT4G02330.1,AT1G02810.1 Orysa4|Os01g20980.1  
AT5G18990.1,AT3G24130.1 Orysa4|Os01g19440.1  
AT1G11590.1,AT4G03930.1,AT1G11580.1 Orysa4|Os01g57854.1  
AT5G20860.1  
AT1G23200.1,AT2G45220.1  
AT4G02300.1,AT4G02320.1  
AT3G60730.1  
AT3G06830.1  
AT5G04960.1  
AT4G15980.1  
AT1G69940.1,AT5G07420.1,AT5G07430.1,AT5G07410.1  
AT5G04970.1,AT3G10720.2  
AT2G19150.1,AT2G47280.1  
AT5G26810.1  
AT5G51490.1,AT3G47400.1,AT5G51500.1  
AT3G27980.1  
Orysa4|Os02g18650.1  
Orysa4|Os11g43840.1  
Orysa4|Os11g08870.1  
Orysa4|Os04g54850.1,Orysa4|Os04g38560.1  
Orysa4|Os04g35770.1  
Orysa4|Os08g10604.1  
Orysa4|Os11g43850.1,Orysa4|Os11g43830.1  
Orysa4|Os04g43370.1  
Orysa4|Os12g37660.1,Orysa4|Os11g45720.1  
Orysa4|Os05g29790.1  
Orysa4|Os07g46190.1  
AT5G24990.1,AT5G10750.1,AT5G25010.1,AT5G25020.1 Orysa4|Os06g48320.1  
AT4G19040.1,AT5G45560.1 Orysa4|Os10g31770.1  
AT5G35180.1 Orysa4|Os08g34060.1  
AT3G54800.1,AT2G28320.1 Orysa4|Os10g33930.1  
Orysa4|Os02g01270.1  
Orysa4|Os06g02590.1  
Orysa4|Os01g35920.1  
AT5G12470.1 Orysa4|Os01g72710.1,Orysa4|Os05g32230.1  
AT4G26870.1,AT4G31180.1 Orysa4|Os02g46130.1  
Orysa4|Os02g04700.1  
AT3G21060.1 Orysa4|Os03g10990.1  
AT5G50810.1 Orysa4|Os08g42380.1  
Orysa4|Os12g03460.1  
AT5G39360.1,AT5G15440.1 Orysa4|Os03g31310.1,Orysa4|Os07g40710.1  
AT1G67930.1 Orysa4|Os05g31490.1  
AT1G69060.1 Orysa4|Os03g54150.1  
AT3G07090.1 Orysa4|Os02g56900.1  
Orysa4|Os10g33350.1  
AT2G22900.1,AT4G37690.1 Orysa4|Os02g49140.1  
AT1G74380.1,AT5G07720.1 Orysa4|Os02g32750.1  
AT3G62720.1,AT4G02500.1 Orysa4|Os03g18820.1  
AT4G38310.1  
AT1G18690.1  
Orysa4|Os12g05380.1  
Orysa4|Os03g19310.1,Orysa4|Os03g19330.1  
AT5G28750.1 Orysa4|Os03g43430.1  
AT5G17570.1 Orysa4|Os04g48820.1  
AT3G03500.1  
AT4G08330.1 Orysa4|Os05g39060.1,Orysa4|Os01g61680.1  
Orysa4|Os05g03590.1

AT3G16230.1 Orysa4|Os01g13100.1  
 AT3G16220.1  
 AT2G33255.1 Orysa4|Os02g57100.1  
 AT5G12900.1 Orysa4|Os09g31370.1,Orysa4|Os08g39740.1  
 AT1G29940.1 Orysa4|Os10g35290.1  
 AT4G21710.1 Orysa4|Os03g44484.1  
 AT5G45140.1 Orysa4|Os03g28960.1  
 AT3G54250.1,AT2G38700.1 Orysa4|Os02g01920.1  
 Orysa4|Os02g01760.1  
 AT5G52160.1,AT5G07230.1,AT5G62080.1 Orysa4|Os08g43290.1  
 Orysa4|Os09g35700.1  
 AT4G10920.1 Orysa4|Os01g50960.1  
 AT1G25290.1 Orysa4|Os09g28100.1  
 AT4G33670.1 Orysa4|Os12g29760.1  
 AT1G04690.1 Orysa4|Os02g57240.1  
 AT5G50430.1,AT1G17280.1 Orysa4|Os06g09330.1  
 AT2G06925.1 Orysa4|Os03g50030.1  
 Orysa4|Os11g34440.1  
 AT5G03450.1 Orysa4|Os10g39850.1,Orysa4|Os03g01790.1  
 AT5G03750.1  
 Orysa4|Os11g45430.1  
 AT5G22250.1,AT3G44260.1 Orysa4|Os04g58810.1  
 AT2G32070.1,AT1G80780.1 Orysa4|Os02g55300.1  
 AT5G10960.1  
 AT1G06450.1  
 AT1G15920.1  
 Orysa4|Os10g03560.1,Orysa4|Os10g03880.1,Orysa4|Os10g03530.1,Orysa4|Os07g07430.1  
 Orysa4|Os06g30790.1,Orysa4|Os06g30770.1,Orysa4|Os06g34520.1  
 Orysa4|Os03g53260.1  
 Orysa4|Os09g24990.1  
 AT3G01780.1 Orysa4|Os11g07470.1  
 AT1G08520.1 Orysa4|Os03g59640.1  
 AT1G23280.1 Orysa4|Os07g16950.1  
 Orysa4|Os07g17040.1  
 AT2G17240.1,AT3G24506.1 Orysa4|Os02g40040.1  
 AT5G62440.1 Orysa4|Os03g08810.1  
 AT4G15030.1 Orysa4|Os11g42000.1  
 AT4G35630.1,AT2G17630.1 Orysa4|Os03g06200.1  
 AT4G17830.1 Orysa4|Os02g46520.1  
 AT2G03810.1 Orysa4|Os04g39240.1,Orysa4|Os02g37120.1  
 AT1G13650.2  
 AT5G37730.1,AT1G23150.1,AT1G70780.1 Orysa4|Os02g21920.1  
 AT2G27830.1 Orysa4|Os04g33310.1,Orysa4|Os06g04480.1,Orysa4|Os02g32580.1  
 AT1G21690.1 Orysa4|Os12g07720.1  
 AT5G27740.1 Orysa4|Os03g57870.1  
 Orysa4|Os10g42400.1  
 AT1G60490.1 Orysa4|Os05g08810.1  
 Orysa4|Os08g21590.1  
 AT5G19855.1 Orysa4|Os07g38230.1,Orysa4|Os03g59320.1  
 AT2G32100.1,AT1G05420.1 Orysa4|Os03g06350.1,Orysa4|Os10g29610.1  
 AT4G14860.1  
 AT1G16220.1,AT1G79630.1 Orysa4|Os08g39100.1  
 AT3G05640.1,AT5G27930.1 Orysa4|Os05g29030.1  
 AT5G36250.1,AT3G02750.3  
 AT3G16800.1  
 Orysa4|Os11g22404.1  
 Orysa4|Os04g25570.1,Orysa4|Os02g27220.1  
 AT5G13700.1 Orysa4|Os09g20260.1,Orysa4|Os09g20284.1  
 AT3G53390.1,AT2G37160.1 Orysa4|Os12g07450.1  
 AT3G04240.1 Orysa4|Os01g68680.1  
 Orysa4|Os02g28830.1  
 AT3G07270.1 Orysa4|Os04g56710.1  
 AT3G10630.1 Orysa4|Os09g12530.1  
 AT5G51840.1 Orysa4|Os10g11060.1  
 AT4G02460.1 Orysa4|Os02g37920.1  
 AT2G44920.2 Orysa4|Os01g05080.1  
 AT1G08260.1,AT2G27120.1 Orysa4|Os02g30800.1  
 AT1G21150.1,AT5G07900.1 Orysa4|Os07g24090.1  
 Orysa4|Os05g34160.1,Orysa4|Os05g33460.1,Orysa4|Os05g33440.1  
 Orysa4|Os02g51450.1,Orysa4|Os04g54510.1,Orysa4|Os02g51460.1  
 AT1G80890.1,AT1G16000.1 Orysa4|Os12g36930.1  
 Orysa4|Os08g17060.1  
 AT2G35820.1,AT2G35830.1,AT2G35810.1 Orysa4|Os01g61670.1  
 AT1G11780.1 Orysa4|Os11g29690.1  
 AT1G68720.1 Orysa4|Os06g29430.1  
 AT3G10380.1 Orysa4|Os08g22864.1  
 AT3G16640.1 Orysa4|Os11g43900.1  
 AT3G05540.1  
 AT4G24160.1 Orysa4|Os09g34860.1  
 AT5G40950.1 Orysa4|Os01g69950.1  
 AT1G72710.1 Orysa4|Os01g38950.1,Orysa4|Os05g51560.1,Orysa4|Os01g51200.1  
 AT4G28880.1,AT4G28860.1 Orysa4|Os01g13060.1,Orysa4|Os02g17910.1

AT5G44100.1,AT1G03930.1,AT4G28540.1 Orysa4|Os02g56560.1  
AT5G57015.1,AT4G26100.1  
AT4G08800.1,AT2G19470.1  
AT5G43320.1,AT3G23340.1,AT4G14340.1,AT1G04440.1  
AT1G54210.1,AT3G13970.1 Orysa4|Os06g10340.1  
AT1G03190.1 Orysa4|Os05g05260.1  
AT1G07750.1,AT2G28680.1 Orysa4|Os01g74480.1,Orysa4|Os05g02520.1  
AT4G25620.1,AT5G52430.1 Orysa4|Os02g57610.1  
AT1G63720.1  
AT5G58640.1,AT3G47300.1 Orysa4|Os05g39110.1,Orysa4|Os01g61580.1  
AT1G34000.1 Orysa4|Os01g40710.1  
AT5G44060.1,AT1G04000.1 Orysa4|Os04g43310.1,Orysa4|Os02g40820.1  
AT3G23440.1  
AT3G52220.1 Orysa4|Os08g44440.1  
AT1G51780.1,AT1G51760.1 Orysa4|Os01g37960.1  
AT3G02875.1 Orysa4|Os03g62060.1,Orysa4|Os03g62070.1,Orysa4|Os07g14590.1  
AT5G54140.1 Orysa4|Os04g44110.1  
AT1G44350.1 Orysa4|Os06g47620.1  
AT5G56650.1,AT5G56660.1  
Orysa4|Os01g51060.1  
Orysa4|Os07g14600.1  
Orysa4|Os07g14610.1  
AT2G43650.1 Orysa4|Os01g01510.1  
AT3G28230.1  
ATCG00170.1 Orysa4|Os04g16819.1  
AT5G54260.1 Orysa4|Os04g54340.1  
AT3G17470.1 Orysa4|Os05g06890.1  
Orysa4|Os05g06920.1  
AT1G78620.2 Orysa4|Os01g52864.1  
AT5G52780.1 Orysa4|Os06g21530.1,Orysa4|Os10g38910.1  
AT4G19100.1  
AT5G45040.1 Orysa4|Os07g38000.1  
AT2G44050.1 Orysa4|Os04g42000.1  
AT3G55960.1 Orysa4|Os01g61640.1,Orysa4|Os05g39070.1  
AT1G55900.1 Orysa4|Os05g43770.1  
Orysa4|Os01g55700.1  
AT5G25752.1 Orysa4|Os05g13370.1  
AT5G25640.1  
AT4G22830.1 Orysa4|Os04g31010.1  
AT3G13230.1 Orysa4|Os01g57910.1,Orysa4|Os03g02420.1  
AT2G27730.1 Orysa4|Os09g39550.1,Orysa4|Os08g44470.1  
AT4G32390.1,AT2G25520.1,AT5G25400.1,AT5G11230.1 Orysa4|Os01g58870.1,Orysa4|Os05g41480.1  
AT3G14410.1 Orysa4|Os08g04110.1  
AT3G17430.1,AT1G48230.1 Orysa4|Os03g49570.1  
AT1G53660.1  
Orysa4|Os11g04380.1,Orysa4|Os12g04170.1  
Orysa4|Os03g18990.1,Orysa4|Os10g34490.1  
Orysa4|Os04g50212.1  
AT5G26040.2 Orysa4|Os06g37420.1  
AT4G12070.1 Orysa4|Os09g31360.1,Orysa4|Os02g48640.1  
Orysa4|Os09g10950.1,Orysa4|Os08g24434.1  
AT1G32360.1 Orysa4|Os08g06330.1  
AT3G19360.1  
AT2G35430.1  
Orysa4|Os01g07930.1  
AT2G04550.1 Orysa4|Os02g48840.1,Orysa4|Os06g20340.1  
AT2G43100.1,AT3G58990.1,AT2G43090.1 Orysa4|Os02g43830.1  
AT1G74910.1 Orysa4|Os03g11050.1  
AT2G04650.1  
AT4G14210.1 Orysa4|Os03g08570.1  
AT3G25640.1 Orysa4|Os02g47980.1,Orysa4|Os05g50160.1,Orysa4|Os01g45510.1,Orysa4|Os06g30030.1  
AT5G42680.1 Orysa4|Os08g37150.1,Orysa4|Os09g28880.1  
AT5G06990.1 Orysa4|Os01g59200.1,Orysa4|Os03g59690.1  
AT5G23100.1  
AT1G76610.1,AT2G41660.1,AT2G37880.1  
AT2G21990.1,AT4G39610.1  
AT2G22460.1,AT5G65340.1,AT1G21050.1  
Orysa4|Os01g16320.1  
AT1G67960.1 Orysa4|Os03g50730.1  
AT2G41670.1 Orysa4|Os11g26030.1  
Orysa4|Os10g42170.1  
AT1G15660.1 Orysa4|Os01g43050.1  
AT4G37460.1 Orysa4|Os07g02300.1  
AT1G50500.1 Orysa4|Os01g67880.1  
AT1G50970.1  
AT2G32970.1 Orysa4|Os02g53210.1  
Orysa4|Os05g51860.1  
AT5G16280.1 Orysa4|Os03g57300.1  
AT4G30880.1 Orysa4|Os03g25350.1,Orysa4|Os01g58650.1,Orysa4|Os01g58660.1  
Orysa4|Os10g05720.1  
AT3G47810.1 Orysa4|Os02g16550.1  
AT5G63010.1 Orysa4|Os04g42880.1

AT2G42040.1 Orysa4|Os02g53360.1,Orysa4|Os06g10570.1  
AT2G20920.1 Orysa4|Os03g04440.1  
AT1G56560.1,AT3G05820.1 Orysa4|Os03g20020.1,Orysa4|Os01g22900.1  
AT4G09510.1,AT1G35580.1 Orysa4|Os04g35280.1,Orysa4|Os02g34560.1  
AT5G22510.1 Orysa4|Os02g32730.1,Orysa4|Os04g33490.1  
AT3G06500.1  
AT4G34860.1  
AT1G72000.1,AT1G22650.1  
Orysa4|Os11g07440.1  
Orysa4|Os02g03320.1  
AT5G62650.1 Orysa4|Os01g12550.1  
AT2G26530.1,AT2G15760.1 Orysa4|Os07g42740.1  
AT5G04610.1 Orysa4|Os08g40890.1  
AT3G46210.1 Orysa4|Os03g63720.1  
AT2G07110.1  
AT4G01750.1,AT4G01770.1,AT1G56550.1,AT4G01220.1 Orysa4|Os05g32120.1  
AT5G02970.1,AT3G09690.1 Orysa4|Os03g17900.1  
Orysa4|Os12g34990.1  
AT1G27980.1 Orysa4|Os01g01080.1  
AT3G28370.1,AT3G28350.1 Orysa4|Os06g12940.1,Orysa4|Os06g13580.1  
AT4G27340.1 Orysa4|Os01g29409.1  
AT5G25840.1 Orysa4|Os01g10260.1,Orysa4|Os06g36040.1  
AT4G14819.1,AT3G22540.1 Orysa4|Os03g46300.1  
AT2G09970.1,AT1G72510.1 Orysa4|Os07g42220.1,Orysa4|Os03g29360.1  
AT2G25780.1 Orysa4|Os05g44410.1,Orysa4|Os01g10310.1,Orysa4|Os05g11300.1  
AT1G79770.1  
AT1G54095.1  
Orysa4|Os03g06430.1,Orysa4|Os10g28700.1  
Orysa4|Os03g53540.1  
Orysa4|Os06g09900.1  
Orysa4|Os01g54140.1,Orysa4|Os01g54170.1  
AT2G45980.1,AT4G00355.1 Orysa4|Os04g08310.1  
Orysa4|Os07g23550.1  
Orysa4|Os02g57600.1  
AT1G52930.1,AT3G15460.1 Orysa4|Os02g37870.1  
AT3G15520.1 Orysa4|Os07g37830.1  
AT3G44620.1 Orysa4|Os08g44320.1  
AT2G44730.1 Orysa4|Os10g41460.1  
AT4G17060.1  
AT3G24860.1  
Orysa4|Os08g37810.1  
AT5G11560.1 Orysa4|Os05g14170.1  
AT2G47930.1 Orysa4|Os01g71170.1  
AT5G18690.1  
AT4G12430.1,AT4G22590.1,AT5G51460.1 Orysa4|Os10g40550.1  
AT5G10100.1,AT5G65140.1,AT4G39770.1,AT2G22190.1  
Orysa4|Os02g51680.1,Orysa4|Os08g31630.1,Orysa4|Os09g20390.1  
AT1G22210.1,AT1G78090.1,AT1G35910.1  
Orysa4|Os02g44230.1  
Orysa4|Os12g09060.1,Orysa4|Os04g46760.1,Orysa4|Os06g23010.1  
Orysa4|Os08g25410.1  
Orysa4|Os06g11840.1,Orysa4|Os03g26910.1  
Orysa4|Os07g43160.1  
AT4G37080.2 Orysa4|Os09g28850.1  
AT5G42690.1  
AT2G31270.1 Orysa4|Os04g10650.1  
AT3G54710.1  
Orysa4|Os10g34820.1  
AT2G21160.1 Orysa4|Os06g50154.1  
AT2G16595.1  
AT5G65480.1,AT4G38060.2 Orysa4|Os08g31940.1,Orysa4|Os09g20930.1  
AT4G13430.1 Orysa4|Os02g03260.1  
AT4G03280.1 Orysa4|Os07g37030.1  
AT2G06210.1 Orysa4|Os07g29360.1  
AT1G19990.1 Orysa4|Os03g14580.1  
AT1G13920.1 Orysa4|Os10g17790.1,Orysa4|Os03g11300.1  
AT1G69325.1  
AT5G61280.1  
AT3G05010.1,AT5G27210.1 Orysa4|Os03g54920.1  
AT5G56290.1 Orysa4|Os08g39080.1  
AT1G50900.1 Orysa4|Os07g33660.1  
Orysa4|Os03g58280.1  
AT2G15240.1 Orysa4|Os09g02170.1  
AT1G16720.1 Orysa4|Os06g49120.1  
AT5G13760.1 Orysa4|Os07g46240.1  
AT3G15380.1 Orysa4|Os04g58504.1,Orysa4|Os04g58470.1  
AT2G14680.1 Orysa4|Os03g31730.1  
AT3G11430.1,AT5G06090.1 Orysa4|Os05g38350.1  
AT2G38110.1 Orysa4|Os01g63580.1  
AT1G06520.1 Orysa4|Os01g44069.1  
AT1G01610.1,AT4G00400.1  
Orysa4|Os03g07010.1

Orysa4|Os03g52570.1,Orysa4|Os10g27330.1  
Orysa4|Os05g37600.1  
Orysa4|Os08g03700.1  
Orysa4|Os03g07060.1,Orysa4|Os02g02340.1  
AT4G39450.1 Orysa4|Os01g08750.1  
AT1G48130.1 Orysa4|Os07g44430.1,Orysa4|Os07g44440.1  
AT3G23800.1,AT4G14030.1,AT4G14040.1 Orysa4|Os01g68770.1  
AT1G18680.1 Orysa4|Os10g18890.1  
AT3G47490.1 Orysa4|Os03g07370.1  
AT2G18465.1 Orysa4|Os05g01590.1,Orysa4|Os04g59060.1  
AT4G33945.1 Orysa4|Os02g52370.1  
AT1G22510.1,AT1G72175.1 Orysa4|Os03g62250.1  
AT4G33940.1  
AT5G57780.1,AT4G30410.1 Orysa4|Os06g44320.1,Orysa4|Os02g08220.1  
Orysa4|Os02g54870.1  
Orysa4|Os08g16030.1  
AT5G27400.1 Orysa4|Os05g05130.1  
AT5G24090.1 Orysa4|Os07g19040.1,Orysa4|Os01g64110.1  
Orysa4|Os01g47070.1  
Orysa4|Os11g47520.1,Orysa4|Os11g47560.1,Orysa4|Os05g15850.1,Orysa4|Os05g15770.1,Orysa4|Os11  
g47600.1,Orysa4|Os08g40690.1,Orysa4|Os05g15920.1,Orysa4|Os11g47570.1,Orysa4|Os08g40740.1,Orysa4|Os08g  
40680.1,Orysa4|Os06g25010.1,Orysa4|Os11g47500.1,Orysa4|Os11g47530.1,Orysa4|Os07g23850.1,Orysa4|Os11g47  
510.1,Orysa4|Os07g43820.1,Orysa4|Os11g47590.1,Orysa4|Os04g27980.1,Orysa4|Os05g15880.1,Orysa4|Os11g476  
10.1,Orysa4|Os11g47580.1,Orysa4|Os11g47550.1  
Orysa4|Os01g64100.1,Orysa4|Os01g19750.1  
Orysa4|Os12g18750.1  
Orysa4|Os01g49320.1  
AT2G17980.1 Orysa4|Os03g42320.1  
AT4G31740.1  
AT1G76750.1 Orysa4|Os03g18530.1  
AT4G14342.1,AT3G23325.1 Orysa4|Os08g34480.1  
AT1G17350.1,AT1G72420.1 Orysa4|Os01g52720.1  
AT3G46560.1 Orysa4|Os12g38310.1  
Orysa4|Os05g02050.1  
AT2G01080.1 Orysa4|Os03g15630.1  
Orysa4|Os09g26480.1  
AT1G71860.1 Orysa4|Os12g07590.1  
Orysa4|Os11g07850.1  
AT1G08700.1 Orysa4|Os01g16930.1  
AT2G29900.1  
AT1G25682.1 Orysa4|Os02g21880.1  
AT1G25988.1  
AT3G63000.1,AT2G47970.1 Orysa4|Os01g27990.1  
AT1G28190.1 Orysa4|Os11g33050.1  
AT1G32500.1 Orysa4|Os01g03650.1  
AT5G38660.1 Orysa4|Os08g27010.1  
AT4G16170.1 Orysa4|Os03g19690.1  
AT4G16180.1  
AT1G80680.1 Orysa4|Os03g07580.1  
AT3G19490.1 Orysa4|Os09g02214.1  
AT1G49810.1  
AT5G44660.1,AT2G34910.1,AT4G20190.1,AT1G30850.1 Orysa4|Os06g37600.1  
Orysa4|Os07g31660.1  
AT3G59400.1 Orysa4|Os11g16550.1  
AT4G15510.1 Orysa4|Os07g17390.1,Orysa4|Os12g37710.1  
AT4G28706.2 Orysa4|Os08g45180.1  
AT5G43910.2  
Orysa4|Os10g32830.1  
AT2G37280.1,AT3G53480.1,AT4G15215.1 Orysa4|Os02g32690.1,Orysa4|Os12g13720.1  
AT5G06530.1 Orysa4|Os03g06139.1  
AT1G71960.1 Orysa4|Os11g07600.1  
AT1G31770.1 Orysa4|Os08g07010.1  
AT1G59870.1,AT1G15210.1,AT3G16340.1 Orysa4|Os01g52560.1  
AT5G52860.1,AT4G25750.1 Orysa4|Os06g30730.1  
AT2G01320.3 Orysa4|Os01g03144.1  
AT3G55090.1,AT2G39350.1,AT3G53510.1,AT2G37360.1,AT5G13580.1 Orysa4|Os03g17350.1  
AT5G60740.1 Orysa4|Os11g22350.1,Orysa4|Os06g51460.1  
AT1G53270.1 Orysa4|Os01g42900.1  
AT4G15236.1,AT4G15230.1  
AT4G15233.1  
AT3G52310.1  
AT3G25620.1,AT4G27420.1  
AT3G55110.1,AT3G55100.1,AT3G55130.1  
AT2G37010.1  
AT1G53390.1  
AT5G19410.1,AT2G13610.1  
Orysa4|Os12g32820.1  
Orysa4|Os06g36090.1  
Orysa4|Os01g61940.1  
Orysa4|Os07g04660.1,Orysa4|Os03g17370.1  
Orysa4|Os05g02890.1  
Orysa4|Os04g11820.1

AT1G67460.1,AT1G67440.1 Orysa4|Os04g31270.1  
AT1G49710.1,AT3G19280.1 Orysa4|Os08g36840.1  
AT3G52155.1 Orysa4|Os09g11510.1  
AT4G14965.1 Orysa4|Os03g10790.1  
AT5G11270.1 Orysa4|Os06g39906.1  
AT1G03140.1 Orysa4|Os07g38420.1  
AT1G54590.1  
Orysa4|Os03g49430.1  
AT2G42210.2 Orysa4|Os02g48610.1  
Orysa4|Os09g10740.1  
AT4G30940.1,AT2G24240.1 Orysa4|Os04g42310.1,Orysa4|Os02g39910.1  
AT1G71080.1 Orysa4|Os01g32300.1  
AT5G38050.1  
AT5G23450.1 Orysa4|Os04g45800.1,Orysa4|Os10g37280.1  
Orysa4|Os08g05650.1  
AT5G25510.1 Orysa4|Os05g48150.1  
AT4G15415.1,AT3G21650.1  
Orysa4|Os08g02860.1,Orysa4|Os04g40860.1,Orysa4|Os03g62730.1,Orysa4|Os07g17360.1  
AT1G13460.1,AT3G26020.1  
AT3G26030.1  
Orysa4|Os05g08560.1  
AT5G44720.1,AT1G30910.1 Orysa4|Os09g38777.1  
AT2G39990.1 Orysa4|Os05g01450.1  
AT5G56210.1,AT4G26450.1,AT3G13360.1 Orysa4|Os09g30350.1,Orysa4|Os04g39540.1  
AT5G08200.1,AT5G23130.1 Orysa4|Os10g34420.1  
Orysa4|Os06g51360.1  
AT5G55130.1 Orysa4|Os02g32460.1  
Orysa4|Os02g56050.1  
AT5G50580.2,AT4G24940.1,AT5G50680.1 Orysa4|Os11g30410.1  
AT3G21530.1 Orysa4|Os07g45100.1,Orysa4|Os03g24610.1  
AT2G48030.1  
AT4G32260.1 Orysa4|Os03g17070.1  
AT5G57300.1 Orysa4|Os01g74520.1  
AT2G07440.1,AT3G57040.1,AT2G41310.1 Orysa4|Os01g72330.1  
AT1G59940.1  
Orysa4|Os11g04720.1,Orysa4|Os12g04500.1  
AT3G30841.1,AT4G09520.1 Orysa4|Os12g35040.1  
AT2G01110.1 Orysa4|Os01g31680.1  
AT5G16790.1,AT3G02950.1 Orysa4|Os05g49470.1,Orysa4|Os08g06360.1  
AT3G03380.1 Orysa4|Os02g48180.1  
AT5G50320.1 Orysa4|Os04g40840.1  
AT4G39920.1 Orysa4|Os02g35110.1  
AT2G44060.1 Orysa4|Os03g62620.1  
Orysa4|Os07g17120.1  
AT1G01470.1,AT2G46140.1 Orysa4|Os05g50710.1,Orysa4|Os01g43530.1,Orysa4|Os01g12580.1  
AT1G54770.1,AT5G30495.1 Orysa4|Os02g49780.1  
AT1G05055.1 Orysa4|Os04g42990.1  
AT2G03390.1 Orysa4|Os08g07540.1,Orysa4|Os01g55880.1  
AT1G51740.1 Orysa4|Os04g44810.1,Orysa4|Os12g05810.1  
AT3G18850.1 Orysa4|Os05g42270.1,Orysa4|Os01g57360.1  
AT1G75020.1  
AT2G46100.1,AT3G04890.1 Orysa4|Os04g48860.1  
AT5G20140.1 Orysa4|Os06g39690.1  
AT2G30080.1 Orysa4|Os05g07210.1  
AT4G19680.2,AT1G31260.1,AT4G19690.2 Orysa4|Os03g46470.1  
AT2G04032.1  
AT5G45105.1  
Orysa4|Os03g46454.1  
AT2G39260.1 Orysa4|Os02g42040.1  
AT1G54500.1 Orysa4|Os08g23410.1  
AT3G57610.1 Orysa4|Os03g49220.1,Orysa4|Os03g07840.1  
AT2G37975.1 Orysa4|Os09g15760.1,Orysa4|Os03g21390.1  
AT1G64750.1,AT5G45010.1 Orysa4|Os01g16640.1  
AT1G71720.1 Orysa4|Os01g40640.1  
Orysa4|Os05g45920.1  
AT2G44600.1,AT3G60200.1 Orysa4|Os02g46420.1,Orysa4|Os10g41800.1,Orysa4|Os04g49850.1  
AT3G05480.1 Orysa4|Os03g22450.1  
AT4G33110.1,AT4G33120.1 Orysa4|Os06g37610.1  
AT4G20960.1 Orysa4|Os03g02600.1,Orysa4|Os04g09810.1  
AT3G02420.1 Orysa4|Os05g51140.1,Orysa4|Os01g42010.1  
Orysa4|Os01g45439.1  
AT3G56840.1 Orysa4|Os01g59490.1  
AT3G10370.1 Orysa4|Os04g14790.1  
AT4G33090.1 Orysa4|Os02g12650.1  
Orysa4|Os08g30810.1  
Orysa4|Os09g19800.1  
AT1G63970.1 Orysa4|Os02g45660.1  
AT1G80210.1,AT3G06820.1 Orysa4|Os05g46490.1  
AT3G23620.1 Orysa4|Os01g33030.1  
Orysa4|Os05g43130.1  
AT1G28120.1 Orysa4|Os08g42540.1  
Orysa4|Os04g55840.1



AT4G37560.1,AT4G37550.1 Orysa4|Os01g55950.1  
AT2G32450.1,AT1G05150.1 Orysa4|Os03g15740.1  
AT3G17120.1 Orysa4|Os01g19410.1,Orysa4|Os05g04150.1  
AT4G01960.1,AT1G02380.1  
AT1G66520.1 Orysa4|Os01g49330.1  
AT1G26190.1 Orysa4|Os02g47860.1  
AT1G73980.1  
AT5G20180.1 Orysa4|Os03g59720.1  
ATCG00760.1  
AT2G45790.1 Orysa4|Os04g58580.1  
AT1G63660.1 Orysa4|Os08g23730.1  
AT1G34150.1 Orysa4|Os03g26440.1  
AT5G11980.1 Orysa4|Os12g35290.1  
AT1G07320.1 Orysa4|Os03g15870.1  
AT4G15790.1 Orysa4|Os12g35620.1  
AT3G02780.1,AT5G16440.1 Orysa4|Os07g36190.1  
Orysa4|Os05g34180.1  
AT1G12840.1 Orysa4|Os05g51530.1  
AT5G67540.2,AT3G49880.1 Orysa4|Os12g21789.1,Orysa4|Os01g65720.1  
AT4G32175.1,AT2G25355.1 Orysa4|Os01g66730.1,Orysa4|Os01g47256.1  
AT3G62010.1 Orysa4|Os03g38970.1  
AT5G58240.1 Orysa4|Os11g02760.1  
AT4G22780.1,AT1G12420.1 Orysa4|Os08g02500.1  
AT2G03730.1,AT1G69040.2 Orysa4|Os03g29980.1  
AT1G76990.1 Orysa4|Os02g34990.1  
AT3G01990.1  
AT5G25320.1  
Orysa4|Os03g14370.1  
Orysa4|Os03g47246.1  
Orysa4|Os08g42080.1  
Orysa4|Os08g42100.1  
Orysa4|Os03g51990.1  
AT1G06110.1 Orysa4|Os11g16390.1  
Orysa4|Os11g16330.1  
AT2G40980.1 Orysa4|Os02g29890.1  
AT2G46230.1 Orysa4|Os06g06410.1  
AT1G26530.1  
AT3G60360.1 Orysa4|Os01g59500.1  
AT5G19060.1,AT3G06150.1 Orysa4|Os05g32960.1  
AT1G01220.1 Orysa4|Os03g02410.1  
AT4G31120.1 Orysa4|Os02g04660.1  
AT1G01710.1 Orysa4|Os04g47120.1  
AT4G00510.1  
AT4G00520.1  
AT1G08560.1 Orysa4|Os03g52650.1  
AT3G52400.1,AT3G11820.1 Orysa4|Os03g57310.1  
AT3G03800.1,AT5G08080.1 Orysa4|Os07g07000.1  
AT1G11250.1,AT1G61290.1 Orysa4|Os02g11890.1,Orysa4|Os06g39050.1  
AT2G18260.1  
AT4G03330.1  
Orysa4|Os12g08980.1  
Orysa4|Os06g07200.1  
AT2G26930.1 Orysa4|Os01g58790.1  
AT5G11900.1 Orysa4|Os01g09890.1  
AT5G62270.1 Orysa4|Os01g58750.1  
AT5G52010.1 Orysa4|Os06g07020.1  
AT4G12240.1  
AT2G41020.1 Orysa4|Os01g68760.1  
AT5G66120.2 Orysa4|Os09g36800.1  
AT3G59080.1,AT2G42980.1 Orysa4|Os02g21040.1  
AT5G45120.1 Orysa4|Os05g43550.1  
AT2G39710.1,AT5G02190.1 Orysa4|Os01g62630.1,Orysa4|Os03g16500.1  
AT5G43100.1 Orysa4|Os07g40260.1  
AT5G22850.1,AT1G08210.1 Orysa4|Os01g56930.1  
AT4G16563.1 Orysa4|Os04g45270.1  
AT3G20015.1 Orysa4|Os04g58070.1  
AT3G52500.1 Orysa4|Os04g58840.1  
AT3G12700.1 Orysa4|Os01g48750.1,Orysa4|Os05g48330.1  
AT1G31450.1,AT2G35615.1,AT2G28030.1,AT2G28040.1,AT1G64830.1,AT2G28010.1,AT5G33340.1  
Orysa4|Os01g08330.1  
AT3G61820.1,AT1G01300.1 Orysa4|Os01g41550.1,Orysa4|Os05g51220.1  
AT1G05840.1 Orysa4|Os02g27360.1  
AT3G54400.1,AT5G07030.1 Orysa4|Os07g46480.1  
AT1G79720.1 Orysa4|Os09g25570.1,Orysa4|Os08g16660.1  
AT1G09750.1 Orysa4|Os03g08790.1  
AT2G03200.1 Orysa4|Os04g37550.1  
AT4G30040.1,AT4G12920.1  
AT3G25700.1  
AT1G66180.1,AT5G37540.1  
AT3G50050.1  
AT3G42550.1,AT2G36670.1  
AT1G65240.1,AT5G36260.1,AT3G02740.1

AT2G28220.1  
     Orysa4|Os06g03120.1  
     Orysa4|Os03g17280.1  
     Orysa4|Os01g48740.1  
     Orysa4|Os05g51350.1  
     Orysa4|Os04g50850.1  
     Orysa4|Os04g26380.1  
     Orysa4|Os04g26834.1  
     Orysa4|Os05g09530.1  
     Orysa4|Os01g72510.1  
     Orysa4|Os05g31890.1,Orysa4|Os10g39350.1,Orysa4|Os12g26470.1,Orysa4|Os01g64830.1,Orysa4|Os07  
 g34920.1,Orysa4|Os08g36530.1,Orysa4|Os01g64840.1,Orysa4|Os05g31830.1  
     Orysa4|Os10g39380.1,Orysa4|Os10g39320.1,Orysa4|Os10g39300.1,Orysa4|Os07g34940.1,Orysa4|Os05  
 g31170.1,Orysa4|Os12g39360.1,Orysa4|Os10g39330.1,Orysa4|Os10g39310.1,Orysa4|Os10g39260.1,Orysa4|Os10g  
 39340.1,Orysa4|Os10g39270.1,Orysa4|Os07g34870.1,Orysa4|Os10g39390.1  
     Orysa4|Os09g27940.1,Orysa4|Os09g27910.1  
     Orysa4|Os04g12160.1  
     Orysa4|Os07g34900.1,Orysa4|Os07g34850.1  
     Orysa4|Os07g34910.1  
     Orysa4|Os03g20230.1,Orysa4|Os06g10670.1,Orysa4|Os03g20270.1,Orysa4|Os03g20260.1  
     Orysa4|Os08g36540.1  
     Orysa4|Os04g37570.1  
     Orysa4|Os01g50170.1  
     Orysa4|Os04g24750.1  
 AT5G19220.1      Orysa4|Os03g52460.1  
 AT5G48300.1      Orysa4|Os09g12660.1,Orysa4|Os08g25734.1  
 AT1G27680.1  
 AT1G05610.1  
 AT1G50670.1      Orysa4|Os02g06890.1  
 AT3G61420.1,AT1G55750.1      Orysa4|Os08g25060.1  
 AT1G80950.1      Orysa4|Os05g28960.1  
 AT4G28020.1      Orysa4|Os09g25950.1  
 AT4G19180.1      Orysa4|Os10g21000.1  
 AT1G22940.1      Orysa4|Os12g09000.1  
 AT5G23880.1      Orysa4|Os09g39590.1  
     Orysa4|Os02g06940.1  
 AT1G67320.1      Orysa4|Os07g22400.1  
 AT3G45090.1,AT5G60760.1      Orysa4|Os09g39870.1  
     Orysa4|Os02g57400.1  
 AT5G50340.1      Orysa4|Os06g05820.1  
 AT1G67490.1,AT1G24320.1      Orysa4|Os01g69210.1  
 AT1G65230.1      Orysa4|Os01g68450.1  
 AT1G76860.1,AT1G21190.1      Orysa4|Os01g64690.1  
 AT3G07050.1      Orysa4|Os01g27730.1  
 AT4G01690.1      Orysa4|Os01g18320.1  
 AT3G47520.1      Orysa4|Os08g33720.1,Orysa4|Os01g61380.1  
 AT5G09660.1      Orysa4|Os12g43630.1,Orysa4|Os03g56280.1  
 AT3G15020.1,AT1G53240.1      Orysa4|Os01g46070.1,Orysa4|Os05g49880.1  
 AT3G53910.1  
 AT2G22780.1  
     Orysa4|Os07g43700.1  
 AT2G19870.1      Orysa4|Os01g53890.1  
 AT1G64355.1      Orysa4|Os05g49650.1  
 AT5G19150.1      Orysa4|Os11g17610.1  
 AT1G16970.1      Orysa4|Os07g08729.1  
 AT5G12370.1      Orysa4|Os12g13590.1  
 AT2G35480.1,AT1G32260.1      Orysa4|Os02g03560.1  
 AT4G37000.1      Orysa4|Os10g25030.1  
     Orysa4|Os10g25020.1  
 AT3G26410.1      Orysa4|Os02g35060.1  
 AT5G06140.1      Orysa4|Os01g64280.1  
 AT3G54440.2      Orysa4|Os01g72340.1  
 AT3G21480.1      Orysa4|Os05g05440.1  
 AT4G03130.1  
     Orysa4|Os01g71256.1  
 AT4G01210.1      Orysa4|Os01g43380.1  
 AT5G04480.1      Orysa4|Os10g39900.1  
 AT2G04900.1      Orysa4|Os03g53980.1  
 AT5G13840.1      Orysa4|Os01g74146.1  
 AT4G22910.1,AT4G11920.1      Orysa4|Os03g03150.1  
 AT4G33260.1,AT5G27570.1,AT5G26900.1,AT5G27080.1,AT4G33270.1      Orysa4|Os02g47180.1  
 AT5G27945.1  
     Orysa4|Os09g06680.1  
 AT1G71270.1,AT1G71300.1      Orysa4|Os03g30460.1  
     Orysa4|Os10g34680.1  
 AT1G21370.1      Orysa4|Os04g35780.1  
 AT2G25310.1,AT4G32130.1      Orysa4|Os06g43650.1  
 AT2G03690.1      Orysa4|Os05g09650.1,Orysa4|Os04g57790.1  
 AT4G20010.1,AT1G31010.1      Orysa4|Os01g72049.1  
 AT5G44785.2  
 AT3G01170.1,AT5G15260.1      Orysa4|Os05g40950.1,Orysa4|Os01g59950.1  
     Orysa4|Os03g10160.1

AT2G17970.1,AT4G36090.3 Orysa4|Os06g04660.1  
AT1G48980.1  
AT5G64670.1 Orysa4|Os08g21840.1  
AT1G77090.1 Orysa4|Os12g08830.1  
AT1G55000.1 Orysa4|Os03g49250.1  
AT4G24840.1 Orysa4|Os03g63250.1  
AT2G23940.1,AT4G30500.1 Orysa4|Os02g44690.1  
AT3G05000.1 Orysa4|Os09g06970.1,Orysa4|Os07g19060.1  
AT4G24440.1 Orysa4|Os01g73890.1,Orysa4|Os05g01710.1  
AT5G03900.2 Orysa4|Os02g33010.1  
AT5G27780.1,AT1G29490.1,AT1G29460.1,AT1G29450.1,AT1G29440.1,AT1G29420.1,AT1G29430.1,AT1G29510.1,A  
T1G29500.1  
Orysa4|Os09g37480.1,Orysa4|Os09g37400.1,Orysa4|Os08g43700.1,Orysa4|Os09g37430.1,Orysa4|Os09  
g37380.1,Orysa4|Os09g37350.1,Orysa4|Os09g37330.1,Orysa4|Os09g37460.1,Orysa4|Os09g37440.1,Orysa4|Os09  
37420.1,Orysa4|Os09g37500.1,Orysa4|Os09g37470.1,Orysa4|Os09g37390.1,Orysa4|Os09g37410.1  
AT1G76190.1,AT1G20470.1  
Orysa4|Os09g37490.1,Orysa4|Os03g18050.1  
AT5G59560.1 Orysa4|Os05g02690.1  
AT1G26740.1,AT1G69485.1 Orysa4|Os03g07290.1,Orysa4|Os10g26690.1  
AT5G45610.1 Orysa4|Os02g03590.1  
AT3G52050.1 Orysa4|Os03g12610.1  
AT1G27700.1 Orysa4|Os10g20240.1,Orysa4|Os03g10920.1  
AT4G27010.1,AT1G72270.1 Orysa4|Os04g53380.1  
Orysa4|Os04g55130.1  
AT1G15780.1 Orysa4|Os08g45080.1  
AT1G15790.1  
AT2G10440.1  
AT1G15770.1  
Orysa4|Os12g14150.1,Orysa4|Os12g14140.1,Orysa4|Os04g03860.1  
Orysa4|Os11g35750.1  
AT5G23060.1 Orysa4|Os02g49680.1  
AT1G07040.1 Orysa4|Os10g32680.1  
AT1G27030.1,AT1G27020.1  
AT2G43030.1 Orysa4|Os02g04460.1  
AT1G50510.1 Orysa4|Os08g39420.1  
AT2G24020.1,AT4G30620.1 Orysa4|Os02g08380.1  
AT1G43580.1 Orysa4|Os04g34620.1,Orysa4|Os02g33830.1  
AT2G23090.1 Orysa4|Os07g02340.1  
AT2G27340.3,AT3G58130.1 Orysa4|Os04g58210.1  
AT2G28605.1 Orysa4|Os04g35530.1  
AT3G03690.1 Orysa4|Os10g30080.1  
AT1G71070.1 Orysa4|Os05g06050.1,Orysa4|Os01g03160.1  
AT4G03340.1,AT1G03520.1 Orysa4|Os08g04790.1  
AT5G15050.1,AT5G39990.1 Orysa4|Os12g44240.1  
AT1G53100.1  
AT3G24040.1  
Orysa4|Os03g16890.1  
Orysa4|Os06g40060.1  
Orysa4|Os03g48560.1  
Orysa4|Os01g56570.1  
AT1G51730.1 Orysa4|Os01g37770.1  
AT4G27350.1,AT5G54240.1 Orysa4|Os07g37310.1  
AT3G60620.1,AT2G45150.1 Orysa4|Os02g03460.1  
AT1G32080.1 Orysa4|Os10g42780.1  
Orysa4|Os01g32830.1  
AT5G13780.1 Orysa4|Os04g54330.1  
AT5G14850.1 Orysa4|Os02g02110.1,Orysa4|Os01g39810.1  
AT5G58030.1 Orysa4|Os01g51220.1  
AT3G48660.1,AT5G63500.1 Orysa4|Os02g30470.1,Orysa4|Os04g31820.1  
AT5G40980.1,AT3G01950.1,AT3G27030.1,AT3G01940.1,AT5G14110.1  
Orysa4|Os11g30360.1,Orysa4|Os04g31870.1,Orysa4|Os02g30600.1  
AT5G40960.1 Orysa4|Os01g63000.1  
AT5G40970.1  
Orysa4|Os05g01290.1  
Orysa4|Os05g01280.1  
Orysa4|Os01g01180.1  
Orysa4|Os02g30550.1  
Orysa4|Os01g69890.1  
AT5G65620.1,AT5G10540.1 Orysa4|Os02g58340.1  
AT5G43150.1 Orysa4|Os06g44870.1,Orysa4|Os07g02460.1,Orysa4|Os03g10860.1  
AT4G10030.1 Orysa4|Os01g66240.1  
AT2G37500.1 Orysa4|Os03g17120.1  
AT1G79975.1 Orysa4|Os01g41040.1  
AT5G12410.1 Orysa4|Os11g36060.1  
Orysa4|Os11g34820.1  
AT3G06580.1 Orysa4|Os03g61710.1  
AT2G11000.1 Orysa4|Os02g55950.1  
ATCG00540.1 Orysa4|Os10g21290.1  
Orysa4|Os08g15280.1,Orysa4|Os01g65910.1  
AT3G50770.1 Orysa4|Os01g56030.1  
AT1G24620.1 Orysa4|Os01g72100.1,Orysa4|Os05g31620.1  
AT1G66400.1,AT5G37770.1 Orysa4|Os05g13580.1

AT1G66410.1,AT5G37780.1  
Orysa4|Os05g41210.1,Orysa4|Os03g20370.1,Orysa4|Os07g48780.1,Orysa4|Os01g16240.1  
AT5G49480.1 Orysa4|Os03g19720.1  
AT5G39670.1,AT3G29000.1 Orysa4|Os11g38780.1  
AT5G44460.1,AT3G59440.1,AT5G17470.1,AT5G42380.1,AT3G51920.1,AT4G03290.1,AT1G18210.1,AT3G25600.1,AT3G03410.1,AT1G21550.1,AT2G15680.1,AT2G41090.1,AT1G18530.1,AT2G36180.1,AT3G10190.1,AT1G32250.1,AT3G22930.1,AT2G41100.1,AT3G03000.1,AT4G14640.1,AT1G12310.1,AT1G62820.1,AT3G07490.1,AT4G37010.2,AT4G20780.1  
Orysa4|Os01g72550.1,Orysa4|Os06g07560.1,Orysa4|Os02g39380.1,Orysa4|Os12g41110.1,Orysa4|Os01g41990.1,Orysa4|Os01g72530.1,Orysa4|Os05g50180.1,Orysa4|Os07g48340.1,Orysa4|Os01g32120.1,Orysa4|Os09g28490.1,Orysa4|Os11g37550.1,Orysa4|Os03g59790.1,Orysa4|Os01g59530.1,Orysa4|Os12g04560.1,Orysa4|Os05g24780.1,Orysa4|Os07g42660.1,Orysa4|Os11g04560.1,Orysa4|Os04g41540.1,Orysa4|Os01g72080.1,Orysa4|Os12g12730.1,Orysa4|Os12g04360.1,Orysa4|Os03g59770.1,Orysa4|Os01g72540.1  
AT3G03430.1,AT5G17480.1 Orysa4|Os08g44660.1  
AT3G03400.1  
AT1G73630.1  
AT3G56800.1,AT2G41110.1,AT3G43810.1  
AT2G27030.3,AT5G21274.1  
AT3G59450.1,AT2G43290.1,AT1G05990.1  
AT4G12860.1  
AT3G01830.1  
AT3G50360.1  
AT1G76650.1,AT1G76640.1  
AT2G41410.1  
Orysa4|Os01g04330.1  
Orysa4|Os03g53200.1  
Orysa4|Os09g24580.1,Orysa4|Os03g59870.1  
Orysa4|Os07g43800.1  
Orysa4|Os02g50060.1  
Orysa4|Os06g47640.1  
Orysa4|Os08g02420.1  
Orysa4|Os07g12240.1  
AT2G38290.1 Orysa4|Os01g61550.1,Orysa4|Os05g39240.1,Orysa4|Os01g61510.1  
Orysa4|Os12g01420.1,Orysa4|Os02g34580.1,Orysa4|Os01g65000.1,Orysa4|Os03g62200.1,Orysa4|Os11g01410.1  
Orysa4|Os01g42740.1  
AT1G76400.1 Orysa4|Os05g23600.1  
AT2G01720.1  
AT5G13310.1,AT5G13970.1 Orysa4|Os04g32580.1  
AT5G51880.1 Orysa4|Os03g02730.1  
AT4G07390.1,AT5G59470.1 Orysa4|Os07g29610.1  
AT5G47890.1 Orysa4|Os04g24520.1  
AT3G54130.1 Orysa4|Os01g63250.1  
AT4G24930.1 Orysa4|Os01g01280.1  
AT5G51150.1 Orysa4|Os07g31260.1  
AT1G72490.1,AT1G17400.1 Orysa4|Os07g42290.1,Orysa4|Os03g29270.1  
AT3G22942.1 Orysa4|Os03g43480.1  
AT3G63420.1  
Orysa4|Os02g04520.1  
AT2G31890.1 Orysa4|Os03g31150.1  
AT2G21970.1 Orysa4|Os04g54630.1  
AT5G52840.1 Orysa4|Os03g19890.1  
AT4G28005.1  
AT3G52300.1 Orysa4|Os08g37320.1  
AT5G23535.1 Orysa4|Os11g04370.1,Orysa4|Os12g04160.1  
AT5G55570.1 Orysa4|Os01g55670.1  
AT5G53000.1 Orysa4|Os11g04520.1,Orysa4|Os12g04290.1  
AT3G47630.2 Orysa4|Os11g34840.1,Orysa4|Os11g34760.1  
AT2G13560.1 Orysa4|Os07g31380.1  
AT4G00570.1 Orysa4|Os10g35960.1  
AT1G79750.1 Orysa4|Os01g09320.1,Orysa4|Os01g52500.1  
AT5G11670.1  
AT2G19900.1  
AT5G04830.1 Orysa4|Os01g73500.1  
AT1G54140.1 Orysa4|Os03g29470.1  
Orysa4|Os07g42150.1  
AT2G41430.1 Orysa4|Os03g23010.1,Orysa4|Os07g46670.1  
AT4G14270.1  
AT5G53050.3 Orysa4|Os05g46460.1,Orysa4|Os02g19650.1  
AT1G56320.1 Orysa4|Os01g14990.1,Orysa4|Os03g19170.1  
Orysa4|Os05g28780.1  
AT3G57940.1,AT1G10490.1 Orysa4|Os12g07300.1  
AT1G55670.1 Orysa4|Os09g30340.1  
AT3G09085.1 Orysa4|Os03g15910.1  
AT1G61240.1,AT1G11170.1 Orysa4|Os07g37760.1  
AT1G67850.1 Orysa4|Os01g68260.1,Orysa4|Os02g19510.1,Orysa4|Os01g73970.1  
AT3G27470.1  
AT1G13000.1  
AT1G24570.1  
Orysa4|Os07g23190.1,Orysa4|Os01g69050.1  
AT5G09920.1 Orysa4|Os02g02510.1  
Orysa4|Os02g49150.1

AT1G14850.1 Orysa4|Os06g20090.1  
AT3G15351.1 Orysa4|Os07g30220.1  
AT2G39630.1 Orysa4|Os03g60700.1  
AT5G67290.1 Orysa4|Os07g06080.1  
Orysa4|Os01g41160.1  
AT1G73590.1 Orysa4|Os02g50960.1,Orysa4|Os06g12610.1  
AT5G57090.1 Orysa4|Os06g44970.1  
AT5G15100.1 Orysa4|Os01g51780.1  
AT5G16530.1 Orysa4|Os08g41720.1,Orysa4|Os01g69070.1,Orysa4|Os09g32770.1  
AT1G23080.1  
AT1G77110.1  
Orysa4|Os11g04190.1,Orysa4|Os12g04000.1  
Orysa4|Os01g58860.1  
Orysa4|Os11g02950.1  
AT4G00231.1 Orysa4|Os03g02720.1  
AT3G48200.1 Orysa4|Os05g51620.1  
Orysa4|Os08g38140.1  
AT4G28290.1 Orysa4|Os10g07440.1,Orysa4|Os10g07450.1  
AT2G38020.1 Orysa4|Os01g47650.1  
AT4G28740.1 Orysa4|Os04g42800.1  
AT5G10710.1 Orysa4|Os04g21610.1  
AT5G14600.1 Orysa4|Os04g25990.1,Orysa4|Os04g25360.1  
Orysa4|Os05g07830.1  
AT5G63220.1 Orysa4|Os01g07100.1  
AT2G36900.1,AT5G50440.1 Orysa4|Os03g45260.1  
AT2G45990.1 Orysa4|Os07g23520.1  
AT3G61220.1,AT2G24190.1,AT1G01800.1 Orysa4|Os04g44950.1,Orysa4|Os07g48640.1,Orysa4|Os04g44920.1  
AT3G59710.1 Orysa4|Os02g39490.1  
Orysa4|Os04g44980.1,Orysa4|Os04g45000.1,Orysa4|Os02g42810.1,Orysa4|Os02g42790.1  
AT5G65490.1 Orysa4|Os08g34740.1  
AT2G30410.1 Orysa4|Os02g57150.1  
AT5G62140.1 Orysa4|Os02g45460.1  
AT5G60540.1 Orysa4|Os02g03740.1  
AT3G28710.1,AT3G28715.1 Orysa4|Os01g40470.1  
AT4G27630.2,AT1G64990.1 Orysa4|Os04g51180.1  
AT5G39410.1 Orysa4|Os07g40620.1  
AT3G01920.1 Orysa4|Os08g41910.1  
AT5G06430.1 Orysa4|Os11g38040.1  
Orysa4|Os11g38450.1  
AT1G61280.1 Orysa4|Os03g43900.1  
Orysa4|Os10g41950.1  
AT4G10020.1 Orysa4|Os03g62590.1  
AT3G03330.1 Orysa4|Os11g16410.1  
AT5G50700.1,AT5G50600.1 Orysa4|Os12g27830.1,Orysa4|Os04g32070.1  
AT3G03350.1  
AT5G50770.1  
AT3G47360.1,AT5G50690.1,AT3G47350.1,AT5G50590.1  
Orysa4|Os04g32080.1  
Orysa4|Os02g30714.1,Orysa4|Os11g30560.1  
AT2G05620.1 Orysa4|Os08g45190.1  
AT5G53850.2 Orysa4|Os11g29370.1  
Orysa4|Os01g01120.1  
AT2G29540.1 Orysa4|Os12g09280.1  
Orysa4|Os11g11110.1  
AT1G34350.1 Orysa4|Os08g01350.1  
Orysa4|Os05g35720.1  
AT1G54780.1 Orysa4|Os05g33280.1  
AT1G59840.1 Orysa4|Os04g55690.1  
AT5G42480.1 Orysa4|Os02g03000.1  
AT5G54440.1 Orysa4|Os12g36760.1  
AT5G51260.1,AT4G25150.1 Orysa4|Os06g04790.1  
AT2G38600.1 Orysa4|Os07g48320.1,Orysa4|Os03g21480.1  
AT4G29260.1,AT4G29270.1  
AT1G04040.1,AT5G44020.1  
AT2G39920.1  
Orysa4|Os05g10310.1,Orysa4|Os05g09724.1,Orysa4|Os05g09740.1,Orysa4|Os05g10210.1,Orysa4|Os05g09704.1  
AT2G02050.1 Orysa4|Os03g03770.1  
AT5G59980.1 Orysa4|Os12g07680.1,Orysa4|Os11g01074.1,Orysa4|Os12g01060.1  
AT1G12370.2 Orysa4|Os10g08580.1  
AT1G24040.1 Orysa4|Os04g39140.1  
AT1G55090.1 Orysa4|Os07g07260.1  
AT2G23840.1 Orysa4|Os07g07480.1  
AT1G65020.1 Orysa4|Os10g42630.1  
AT1G07830.1 Orysa4|Os06g03790.1  
AT1G08380.1 Orysa4|Os04g33830.1  
AT4G01470.1 Orysa4|Os01g74450.1  
AT1G17810.1,AT1G73190.1 Orysa4|Os10g35050.1  
AT3G47440.1 Orysa4|Os04g46490.1  
AT2G25810.1 Orysa4|Os05g14240.1,Orysa4|Os01g13120.1  
AT3G26520.1,AT2G36830.1 Orysa4|Os03g05290.1  
Orysa4|Os04g44570.1

AT1G01290.1 Orysa4|Os04g38700.1  
AT3G27100.1 Orysa4|Os01g69110.1  
AT4G25720.1 Orysa4|Os06g01410.1  
AT5G64160.1 Orysa4|Os02g51700.1  
AT3G54690.1 Orysa4|Os02g06360.1  
AT5G24680.1 Orysa4|Os02g01710.1  
AT5G13030.1 Orysa4|Os06g21600.1  
AT1G63780.1 Orysa4|Os08g05880.1  
AT4G34200.1 Orysa4|Os04g55720.1  
AT3G19480.1  
Orysa4|Os06g44460.1  
AT3G28430.1 Orysa4|Os04g23210.1  
AT2G20890.1 Orysa4|Os07g37250.1  
AT5G27990.1 Orysa4|Os08g39820.1  
AT3G22510.1  
AT2G18250.1 Orysa4|Os07g08210.1  
Orysa4|Os02g04120.1  
AT4G33625.1 Orysa4|Os07g02710.1  
AT1G80380.2 Orysa4|Os01g48990.1  
AT5G44070.1,AT1G03980.1 Orysa4|Os06g01260.1  
Orysa4|Os05g34290.1  
AT4G26710.1,AT5G55290.1 Orysa4|Os04g56540.1  
AT1G80190.1 Orysa4|Os05g37980.1  
AT5G06360.1 Orysa4|Os07g47580.1  
AT1G10240.1 Orysa4|Os04g36590.1  
AT1G80010.1,AT1G52520.1 Orysa4|Os02g39520.1,Orysa4|Os03g62660.1,Orysa4|Os02g39540.1  
AT4G38180.1,AT4G38170.1,AT2G27110.1 Orysa4|Os03g45300.1  
AT5G28530.1  
AT3G22170.1  
AT5G18960.1  
Orysa4|Os07g39490.1  
Orysa4|Os07g31420.1,Orysa4|Os04g40060.1,Orysa4|Os03g15010.1  
Orysa4|Os12g12380.1,Orysa4|Os06g39680.1,Orysa4|Os11g14020.1  
Orysa4|Os11g11220.1,Orysa4|Os01g63380.1,Orysa4|Os03g27400.1,Orysa4|Os01g06852.1,Orysa4|Os02g10840.1,Orysa4|Os04g52560.1  
Orysa4|Os09g12670.1,Orysa4|Os12g28580.1,Orysa4|Os09g11920.1,Orysa4|Os01g16660.1,Orysa4|Os04g34430.1,Orysa4|Os07g42400.1,Orysa4|Os01g64940.1,Orysa4|Os12g05940.1,Orysa4|Os03g16540.1,Orysa4|Os04g10390.1,Orysa4|Os06g13770.1,Orysa4|Os02g01860.1,Orysa4|Os10g42160.1  
Orysa4|Os11g17300.1,Orysa4|Os04g28580.1,Orysa4|Os10g24020.1,Orysa4|Os07g27770.1,Orysa4|Os06g42420.1,Orysa4|Os01g19050.1,Orysa4|Os07g27800.1,Orysa4|Os02g44790.1,Orysa4|Os11g17430.1,Orysa4|Os06g42520.1,Orysa4|Os02g40950.1,Orysa4|Os10g34884.1,Orysa4|Os01g63030.1,Orysa4|Os03g41800.1,Orysa4|Os07g32110.1,Orysa4|Os05g39480.1,Orysa4|Os01g61100.1  
Orysa4|Os03g06860.1,Orysa4|Os08g44170.1,Orysa4|Os02g16240.1,Orysa4|Os02g39220.1,Orysa4|Os01g33540.1  
Orysa4|Os01g23840.1,Orysa4|Os08g32440.1,Orysa4|Os03g08370.1  
Orysa4|Os09g01520.1,Orysa4|Os05g10760.1,Orysa4|Os01g11680.1,Orysa4|Os01g43000.1  
Orysa4|Os05g03090.1,Orysa4|Os07g01270.1,Orysa4|Os04g44630.1,Orysa4|Os07g46900.1,Orysa4|Os09g07200.1,Orysa4|Os08g15510.1,Orysa4|Os12g32140.1,Orysa4|Os02g06820.1,Orysa4|Os06g13900.1,Orysa4|Os05g40670.1,Orysa4|Os03g12490.1,Orysa4|Os12g24810.1,Orysa4|Os08g27740.1,Orysa4|Os03g37920.1,Orysa4|Os01g32700.1,Orysa4|Os03g21330.1,Orysa4|Os01g16740.1,Orysa4|Os04g25690.1,Orysa4|Os06g07010.1,Orysa4|Os08g33270.1,Orysa4|Os01g71850.1,Orysa4|Os05g03800.1,Orysa4|Os07g31400.1,Orysa4|Os05g37540.1,Orysa4|Os04g30870.1,Orysa4|Os02g26780.1,Orysa4|Os07g37630.1,Orysa4|Os05g25320.1,Orysa4|Os09g01780.1,Orysa4|Os06g32530.1,Orysa4|Os05g30720.1,Orysa4|Os09g11390.1,Orysa4|Os01g64200.1,Orysa4|Os08g20486.1,Orysa4|Os03g56630.1,Orysa4|Os05g30310.1,Orysa4|Os08g40310.1,Orysa4|Os06g36970.1,Orysa4|Os06g25610.1,Orysa4|Os06g28150.1,Orysa4|Os05g15930.1,Orysa4|Os09g25510.1,Orysa4|Os05g10280.1,Orysa4|Os02g01950.1  
Orysa4|Os02g28180.1  
Orysa4|Os11g26770.1  
Orysa4|Os04g54880.1,Orysa4|Os08g14880.1,Orysa4|Os10g06890.1,Orysa4|Os09g10380.1,Orysa4|Os07g35710.1,Orysa4|Os07g18290.1,Orysa4|Os02g34590.1,Orysa4|Os09g27390.1,Orysa4|Os11g41380.1,Orysa4|Os11g02980.1,Orysa4|Os09g08460.1,Orysa4|Os04g04400.1,Orysa4|Os03g50900.1,Orysa4|Os08g06930.1  
Orysa4|Os06g28250.1  
AT1G74710.2,AT1G18870.1 Orysa4|Os09g19734.1  
AT5G57490.1 Orysa4|Os03g04460.1  
AT5G67500.1 Orysa4|Os03g10510.1  
AT3G01280.1,AT5G15090.1  
AT5G37610.1  
AT3G49920.1  
AT4G14890.1 Orysa4|Os03g45710.1  
AT1G60950.1,AT1G10960.1 Orysa4|Os08g01380.1  
AT2G27510.1 Orysa4|Os05g37140.1,Orysa4|Os03g61960.1  
Orysa4|Os01g64120.1  
AT5G23940.1 Orysa4|Os08g44840.1  
AT5G07850.1,AT5G07860.1,AT5G42830.1,AT5G07870.1 Orysa4|Os06g01350.1,Orysa4|Os07g04970.1  
AT5G67160.1,AT5G67150.1,AT3G50300.1,AT3G50270.1,AT3G50280.1,AT5G38130.1  
Orysa4|Os08g02030.1,Orysa4|Os04g30570.1,Orysa4|Os08g01950.1,Orysa4|Os08g02020.1,Orysa4|Os08g01980.1,Orysa4|Os08g01960.1  
AT2G39980.1,AT5G01210.1 Orysa4|Os05g37660.1,Orysa4|Os01g63480.1  
Orysa4|Os08g01970.1  
Orysa4|Os04g30600.1  
AT1G12780.1,AT1G63180.1 Orysa4|Os09g35800.1  
AT4G20460.1,AT1G30620.1 Orysa4|Os07g04690.1  
AT4G10960.1,AT1G64440.1,AT4G23920.1 Orysa4|Os05g51670.1

AT2G34850.1  
Orysa4|Os08g03570.1,Orysa4|Os04g52730.1  
Orysa4|Os09g15420.1  
AT1G22160.1,AT1G78020.1,AT4G39795.1 Orysa4|Os09g20240.1,Orysa4|Os08g31510.1,Orysa4|Os06g11980.1  
AT4G17670.1,AT5G47060.1 Orysa4|Os04g49620.1  
Orysa4|Os02g51550.1  
Orysa4|Os09g26370.1  
Orysa4|Os11g43790.1  
Orysa4|Os02g46180.1,Orysa4|Os02g46190.1,Orysa4|Os04g49650.1,Orysa4|Os04g49660.1  
Orysa4|Os04g49680.1,Orysa4|Os04g49670.1,Orysa4|Os02g46210.1  
Orysa4|Os06g50080.1  
AT2G16090.1,AT4G34370.1 Orysa4|Os03g13100.1  
AT3G27710.1,AT3G27720.1  
Orysa4|Os03g42760.1,Orysa4|Os03g42790.1,Orysa4|Os03g42780.1  
AT1G67480.1 Orysa4|Os04g31120.1,Orysa4|Os02g30210.1  
AT1G27420.1  
AT2G38770.1 Orysa4|Os03g26960.1  
AT1G13690.1 Orysa4|Os03g40310.1  
AT1G09340.1 Orysa4|Os12g23180.1  
AT1G30610.1 Orysa4|Os01g48380.1  
AT5G67570.1 Orysa4|Os05g25060.1  
AT1G12240.1,AT1G62660.1 Orysa4|Os04g45290.1,Orysa4|Os02g01590.1  
AT3G52600.1,AT2G36190.1 Orysa4|Os04g33740.1,Orysa4|Os04g33720.1  
AT3G13784.1,AT1G55120.1,AT3G13790.1  
AT5G11920.1  
Orysa4|Os03g52560.1,Orysa4|Os02g33110.1  
AT5G39790.1 Orysa4|Os02g04330.1  
AT4G21880.1,AT4G04790.1 Orysa4|Os02g03970.1  
AT1G19710.1,AT1G75420.1 Orysa4|Os01g15780.1  
AT1G78800.1 Orysa4|Os04g49960.1  
AT4G29950.1,AT5G57210.1,AT2G19240.1 Orysa4|Os08g40620.1  
Orysa4|Os06g45080.1  
AT5G52360.1,AT4G25590.1 Orysa4|Os04g46910.1,Orysa4|Os02g44470.1  
AT2G31200.1 Orysa4|Os03g56790.1,Orysa4|Os12g43340.1  
AT4G34970.1,AT2G16700.1 Orysa4|Os03g13950.1  
AT5G59890.1,AT3G46000.1,AT4G00680.1,AT1G01750.1,AT5G59880.1,AT3G46010.1  
AT3G45990.1  
Orysa4|Os07g20170.1,Orysa4|Os10g37670.1  
AT5G11340.1 Orysa4|Os01g42470.1  
AT2G40840.1 Orysa4|Os07g46790.1  
AT1G78630.1 Orysa4|Os01g54540.1  
AT3G48425.1 Orysa4|Os12g18200.1  
AT1G63810.1 Orysa4|Os12g06910.1  
AT2G31970.1 Orysa4|Os02g29464.1  
AT5G04600.1 Orysa4|Os08g31810.1  
AT1G07890.1 Orysa4|Os07g49400.1,Orysa4|Os03g17690.1  
AT4G08390.1,AT1G77490.1 Orysa4|Os12g07820.1,Orysa4|Os04g35520.1,Orysa4|Os02g34810.1  
AT4G32320.1 Orysa4|Os08g41090.1  
AT4G35000.1 Orysa4|Os08g43560.1  
AT1G33660.1  
AT3G09640.1  
AT4G35970.1  
Orysa4|Os12g07830.1  
Orysa4|Os09g36750.1  
Orysa4|Os04g14680.1  
AT3G18480.1 Orysa4|Os03g50300.1  
AT3G55060.1,AT2G39300.1 Orysa4|Os03g20580.1,Orysa4|Os07g48700.1  
AT5G15920.1 Orysa4|Os05g51790.1  
Orysa4|Os11g36460.1  
AT4G02110.1 Orysa4|Os03g19190.1,Orysa4|Os07g49010.1  
AT3G60500.1,AT3G12990.1 Orysa4|Os02g34570.1  
AT1G73965.1,AT1G68795.1 Orysa4|Os02g21890.1  
AT4G29100.1,AT2G20100.1 Orysa4|Os05g14010.1,Orysa4|Os01g13000.1,Orysa4|Os02g17680.1  
AT3G19500.1,AT1G49830.1 Orysa4|Os03g55220.1  
AT1G61660.1,AT3G20640.1 Orysa4|Os08g08160.1,Orysa4|Os04g53990.1  
AT1G05710.2,AT2G31730.1 Orysa4|Os04g41570.1  
AT1G27660.1 Orysa4|Os01g01600.1  
Orysa4|Os04g47810.1,Orysa4|Os02g45010.1  
Orysa4|Os01g57580.1,Orysa4|Os05g42180.1  
Orysa4|Os03g17130.1  
AT5G26110.1 Orysa4|Os10g28640.1  
AT1G08120.1  
AT4G28130.1,AT2G20900.1 Orysa4|Os08g08110.1,Orysa4|Os04g54200.1  
AT4G34150.1 Orysa4|Os06g43190.1  
AT1G30970.1 Orysa4|Os09g38790.1  
AT3G29390.1 Orysa4|Os03g11520.1  
AT5G53870.1 Orysa4|Os06g46740.1,Orysa4|Os02g06670.1  
AT5G24710.1 Orysa4|Os01g46510.1  
Orysa4|Os01g46450.1  
AT1G11260.1,AT4G21480.1  
Orysa4|Os07g37320.1,Orysa4|Os01g38670.1,Orysa4|Os03g39710.1,Orysa4|Os08g08070.1,Orysa4|Os09g12590.1,Orysa4|Os07g01560.1

AT5G17010.1,AT3G03090.1 Orysa4|Os10g42830.1  
AT2G43330.1 Orysa4|Os04g41460.1  
AT4G02050.1 Orysa4|Os09g24924.1  
AT1G67300.2 Orysa4|Os02g17500.1  
AT3G05960.1,AT5G26250.1 Orysa4|Os07g10590.1  
AT1G05030.1 Orysa4|Os09g23110.1  
AT5G61520.1 Orysa4|Os09g09520.1,Orysa4|Os07g03960.1,Orysa4|Os06g04900.1  
AT2G20780.1 Orysa4|Os04g58220.1  
AT2G16130.1,AT2G16120.1,AT3G18830.1 Orysa4|Os01g73590.1,Orysa4|Os07g39360.1,Orysa4|Os07g39350.1  
AT1G77210.1 Orysa4|Os09g15330.1  
AT5G16150.1 Orysa4|Os01g04190.1  
AT1G34580.1  
Orysa4|Os04g37990.1,Orysa4|Os04g38220.1,Orysa4|Os04g38026.1,Orysa4|Os02g36414.1,Orysa4|Os04  
g37970.1  
AT1G30220.1 Orysa4|Os07g05640.1  
AT2G18480.1,AT4G36670.1 Orysa4|Os10g21590.1  
AT1G19450.1,AT1G75220.1 Orysa4|Os05g50280.1,Orysa4|Os05g49270.1  
AT5G23270.1,AT1G50310.1,AT3G19940.1,AT3G19930.1  
AT5G59250.1  
AT1G79820.1  
Orysa4|Os03g01170.1,Orysa4|Os10g41190.1  
Orysa4|Os12g04640.1  
Orysa4|Os09g27900.1  
Orysa4|Os05g32900.1  
Orysa4|Os11g41850.1,Orysa4|Os11g41870.1,Orysa4|Os11g41840.1,Orysa4|Os12g32940.1  
Orysa4|Os03g10100.1,Orysa4|Os03g10090.1  
Orysa4|Os10g40950.1,Orysa4|Os12g32760.1  
Orysa4|Os02g36450.1,Orysa4|Os04g38010.1,Orysa4|Os02g36440.1  
Orysa4|Os02g36490.1  
Orysa4|Os04g38280.1  
Orysa4|Os04g43210.1  
Orysa4|Os05g49260.1  
AT5G03170.1,AT5G60490.1 Orysa4|Os01g06580.1,Orysa4|Os05g07060.1  
AT2G04780.1 Orysa4|Os09g30486.1,Orysa4|Os08g39270.1  
Orysa4|Os05g48900.1  
Orysa4|Os04g39590.1  
Orysa4|Os04g39600.1  
AT3G05430.1,AT5G27650.1 Orysa4|Os05g05660.1  
AT3G01750.1 Orysa4|Os05g23320.1,Orysa4|Os02g38970.1  
AT3G04140.1  
Orysa4|Os09g36690.1  
AT1G71730.1 Orysa4|Os05g08920.1  
AT2G22250.3 Orysa4|Os01g65090.1  
AT3G21540.1 Orysa4|Os03g05720.1  
AT1G22040.1 Orysa4|Os10g21930.1  
Orysa4|Os02g36520.1  
AT5G43490.1,AT5G48610.1 Orysa4|Os03g63040.1,Orysa4|Os08g41420.1  
AT1G24706.1 Orysa4|Os01g68810.1  
AT4G19190.1 Orysa4|Os06g49510.1  
AT1G56290.1 Orysa4|Os03g52980.1  
AT1G50300.1 Orysa4|Os09g12800.1,Orysa4|Os07g19560.1  
AT5G54750.1 Orysa4|Os07g44790.1,Orysa4|Os03g28400.1  
AT1G68010.1 Orysa4|Os02g01150.1  
AT5G44040.1,AT1G04030.1 Orysa4|Os03g04550.1,Orysa4|Os04g43230.1  
AT2G33400.1  
AT4G03120.1 Orysa4|Os02g16640.1  
AT3G21190.1,AT1G51630.1 Orysa4|Os09g32320.1  
AT4G04350.1 Orysa4|Os01g03020.1  
AT2G30320.1 Orysa4|Os03g21980.1  
AT5G08160.1 Orysa4|Os09g20640.1  
Orysa4|Os09g06230.1  
AT3G42660.1 Orysa4|Os09g06560.1  
AT3G05670.1 Orysa4|Os03g19020.1,Orysa4|Os07g49030.1  
Orysa4|Os06g17280.1  
AT1G48110.1,AT3G17330.1 Orysa4|Os03g20180.1  
AT3G13060.2 Orysa4|Os08g44200.1  
AT1G55500.1,AT3G13460.1 Orysa4|Os03g53670.1,Orysa4|Os03g06240.1  
AT1G79270.1 Orysa4|Os01g48790.1  
AT5G58190.2  
AT1G27960.1  
AT5G61020.1,AT3G03950.3  
Orysa4|Os01g22630.1  
Orysa4|Os05g06740.1  
Orysa4|Os08g12760.1,Orysa4|Os04g51940.1  
Orysa4|Os05g01520.1  
Orysa4|Os07g07490.1  
Orysa4|Os04g04000.1  
AT5G58130.1 Orysa4|Os02g04560.1,Orysa4|Os02g04620.1  
AT1G72440.1 Orysa4|Os09g02810.1  
AT3G15970.1,AT1G52380.1 Orysa4|Os05g28190.1  
AT3G01160.1 Orysa4|Os07g34740.1  
AT5G53900.2 Orysa4|Os11g25920.1



AT3G15230.1  
AT3G15240.1  
Orysa4|Os07g03980.1  
AT3G57690.1,AT2G41905.1 Orysa4|Os06g21410.1  
AT3G20865.1  
AT2G21280.1 Orysa4|Os02g58790.1  
AT2G21960.1 Orysa4|Os04g54640.1  
Orysa4|Os10g30980.1  
AT2G41640.1,AT3G57380.1,AT3G10320.1 Orysa4|Os01g31370.1,Orysa4|Os07g46380.1  
AT3G18180.1,AT3G18170.1  
Orysa4|Os01g02940.1,Orysa4|Os06g27560.1,Orysa4|Os02g22480.1,Orysa4|Os01g02900.1,Orysa4|Os12  
g13640.1,Orysa4|Os03g37010.1  
AT2G03370.1,AT2G03360.1  
Orysa4|Os01g72610.1,Orysa4|Os11g36700.1  
Orysa4|Os08g34680.1,Orysa4|Os06g13710.1  
Orysa4|Os05g32544.1  
Orysa4|Os02g22380.1,Orysa4|Os06g28124.1,Orysa4|Os01g02920.1,Orysa4|Os04g12010.1,Orysa4|Os06  
g49300.1  
Orysa4|Os06g49320.1,Orysa4|Os10g35020.1  
Orysa4|Os01g02930.1,Orysa4|Os02g22190.1  
Orysa4|Os06g20570.1  
AT3G43850.1,AT5G21940.1 Orysa4|Os02g53830.1,Orysa4|Os08g35630.1,Orysa4|Os06g10220.1  
AT4G17050.1 Orysa4|Os07g31270.1  
AT4G20130.1 Orysa4|Os05g50980.1  
AT1G50450.1 Orysa4|Os12g04260.1,Orysa4|Os11g04490.1  
AT5G23200.1,AT5G08270.1 Orysa4|Os02g42300.1  
AT2G30890.1 Orysa4|Os05g49040.1  
AT4G22540.1,AT4G08180.1,AT4G12460.1 Orysa4|Os10g40590.1  
AT1G13170.1 Orysa4|Os12g18770.1  
AT1G77730.1  
Orysa4|Os08g05870.1  
Orysa4|Os03g49770.1  
AT5G56130.1 Orysa4|Os09g12710.1  
Orysa4|Os03g32020.1  
AT2G47990.1 Orysa4|Os07g12320.1  
AT2G26350.1 Orysa4|Os07g41800.1  
AT5G09840.1,AT5G64710.1 Orysa4|Os12g06560.1  
Orysa4|Os11g06680.1  
AT4G28450.1 Orysa4|Os01g13730.1  
AT1G19750.1,AT1G27840.3 Orysa4|Os02g20430.1  
Orysa4|Os01g63900.1  
AT5G57710.1,AT4G30350.1 Orysa4|Os08g15230.1  
Orysa4|Os02g54720.1  
AT2G37990.1 Orysa4|Os04g58830.1  
AT1G49670.1 Orysa4|Os09g28570.1  
AT1G70590.1 Orysa4|Os04g40030.1  
AT2G28230.1,AT4G09070.1 Orysa4|Os09g27140.1  
AT2G28020.1  
AT4G29940.1 Orysa4|Os02g05450.1  
AT1G21570.1 Orysa4|Os06g43120.1  
AT1G21580.1  
AT1G13160.1,AT4G31520.1 Orysa4|Os04g53770.1  
AT4G18910.1,AT4G19030.1 Orysa4|Os05g11560.1,Orysa4|Os02g13870.1  
AT4G10380.1 Orysa4|Os10g36924.1  
AT2G34390.1,AT1G31885.1  
AT3G06100.1  
AT2G29870.1  
AT5G37810.1,AT5G37820.1  
AT1G80760.1  
Orysa4|Os06g35930.1  
Orysa4|Os01g10530.1  
Orysa4|Os12g10280.1,Orysa4|Os08g05580.1,Orysa4|Os08g05590.1,Orysa4|Os08g05600.1  
AT4G36980.1 Orysa4|Os03g27840.1  
AT2G37340.1,AT3G53500.2 Orysa4|Os05g02880.1,Orysa4|Os01g06290.1  
Orysa4|Os05g07000.1  
AT5G58370.2 Orysa4|Os03g60180.1  
AT1G55980.1,AT1G56000.1 Orysa4|Os03g57070.1  
AT5G66400.1 Orysa4|Os11g26790.1,Orysa4|Os11g26780.1,Orysa4|Os11g26760.1,Orysa4|Os11g26750.1  
AT3G50980.1  
AT1G04730.1 Orysa4|Os03g15810.1  
AT3G27310.1 Orysa4|Os04g40870.1  
AT1G55160.1 Orysa4|Os05g51540.1,Orysa4|Os01g39780.1  
AT2G19530.1  
AT2G35930.1,AT3G52450.1 Orysa4|Os04g34030.1,Orysa4|Os02g33590.1,Orysa4|Os04g58920.1  
AT1G66160.1,AT5G37490.1  
Orysa4|Os03g13740.1,Orysa4|Os06g13870.1,Orysa4|Os10g03440.1,Orysa4|Os02g50460.1  
AT3G11840.1  
AT3G02840.1  
Orysa4|Os01g64570.1  
Orysa4|Os11g36490.1,Orysa4|Os12g08290.1  
Orysa4|Os02g46500.1,Orysa4|Os04g49970.1  
Orysa4|Os12g06410.1

Orysa4|Os02g12410.1  
AT1G60850.1,AT1G60620.1 Orysa4|Os02g49180.1,Orysa4|Os03g18410.1  
AT3G50560.1 Orysa4|Os08g37130.1  
AT1G20225.1,AT1G76020.1 Orysa4|Os04g15690.1,Orysa4|Os09g37020.1  
AT2G22570.1 Orysa4|Os02g39400.1  
AT5G61150.1 Orysa4|Os03g54930.1,Orysa4|Os12g38970.1  
AT4G34730.1 Orysa4|Os06g04610.1  
AT5G27620.1 Orysa4|Os03g52750.1  
AT5G09310.1 Orysa4|Os01g72960.1  
AT3G11964.1 Orysa4|Os07g10350.1  
AT1G17760.1 Orysa4|Os12g38380.1  
AT3G03460.1,AT5G17510.1 Orysa4|Os12g27994.1  
AT2G31210.1,AT2G31220.1,AT1G06170.1 Orysa4|Os04g51070.1  
AT2G31215.1  
Orysa4|Os01g18870.1  
AT3G27460.1,AT5G40550.1 Orysa4|Os12g19350.1  
AT1G75670.1 Orysa4|Os06g07190.1  
AT1G11880.1 Orysa4|Os12g31480.1  
AT5G45820.1 Orysa4|Os05g26820.1,Orysa4|Os01g10890.1  
AT4G29810.2,AT4G26070.3 Orysa4|Os06g05520.1  
AT3G51850.1 Orysa4|Os01g61590.1  
AT1G53570.1 Orysa4|Os11g10100.1,Orysa4|Os02g35010.1,Orysa4|Os04g35700.1  
AT4G14580.1,AT3G23000.1 Orysa4|Os12g41090.1,Orysa4|Os03g43440.1  
AT3G15220.1 Orysa4|Os07g32400.1  
AT3G44200.1 Orysa4|Os01g64490.1,Orysa4|Os05g36960.1  
AT3G04530.1,AT1G08650.1 Orysa4|Os02g41580.1,Orysa4|Os02g56310.1  
AT2G17890.1,AT5G66210.1,AT4G36070.1 Orysa4|Os02g03410.1,Orysa4|Os07g22710.1  
AT1G02970.1 Orysa4|Os02g04240.1  
AT1G77720.1 Orysa4|Os03g49750.1  
AT2G25880.1,AT4G32830.1 Orysa4|Os01g09580.1  
AT4G24100.1,AT4G10730.1 Orysa4|Os03g02320.1,Orysa4|Os10g37480.1  
AT2G26980.4 Orysa4|Os12g03810.1,Orysa4|Os11g03970.1  
AT3G56760.1,AT2G41140.1 Orysa4|Os03g25070.1,Orysa4|Os07g44710.1  
AT4G14480.1 Orysa4|Os03g47470.1  
AT2G25090.1,AT5G10930.1,AT5G25110.1 Orysa4|Os09g25090.1  
AT2G46700.1 Orysa4|Os10g36710.1  
AT5G14720.1 Orysa4|Os06g29120.1  
AT4G35310.1,AT2G17290.1 Orysa4|Os02g46090.1,Orysa4|Os04g49510.1  
AT3G45240.1,AT5G60550.1 Orysa4|Os03g50330.1  
AT1G35670.1,AT4G09570.1 Orysa4|Os11g07040.1,Orysa4|Os12g07230.1  
AT3G21220.1,AT1G51660.1 Orysa4|Os02g54600.1,Orysa4|Os06g09180.1  
AT1G09000.1,AT3G06030.1 Orysa4|Os09g21510.1,Orysa4|Os08g32600.1  
AT1G01140.3 Orysa4|Os03g03510.1  
AT4G26890.1,AT1G05100.1,AT2G32510.1,AT5G55090.1  
Orysa4|Os10g04010.1,Orysa4|Os01g50410.1,Orysa4|Os01g50420.1,Orysa4|Os02g21700.1,Orysa4|Os01g50370.1,Orysa4|Os01g50400.1,Orysa4|Os05g46760.1,Orysa4|Os10g04000.1,Orysa4|Os05g46750.1  
AT1G30270.1 Orysa4|Os07g05620.1  
AT1G48260.1,AT3G17510.1 Orysa4|Os01g18800.1,Orysa4|Os05g04550.1,Orysa4|Os07g44290.1  
AT5G20930.1 Orysa4|Os03g53880.1  
AT4G23650.1 Orysa4|Os01g43410.1,Orysa4|Os05g50810.1  
AT1G63700.1 Orysa4|Os02g44642.1,Orysa4|Os04g47240.1  
AT5G66850.1 Orysa4|Os03g55560.1,Orysa4|Os07g02780.1  
AT3G08730.1,AT3G08720.1 Orysa4|Os03g21620.1,Orysa4|Os07g48290.1  
AT1G12580.1 Orysa4|Os06g03682.1  
AT1G12680.1 Orysa4|Os09g29170.1  
AT5G07070.1,AT5G58380.1 Orysa4|Os07g48100.1,Orysa4|Os03g22050.1  
AT5G12480.1,AT5G19450.1 Orysa4|Os07g38120.1,Orysa4|Os03g59390.1  
AT5G35410.1 Orysa4|Os06g40370.1  
AT5G12180.1,AT5G19360.1 Orysa4|Os01g59360.1  
AT3G10660.1,AT5G04870.1 Orysa4|Os03g57450.1  
AT1G32320.1 Orysa4|Os02g46760.1  
AT5G40440.1 Orysa4|Os06g27890.1  
AT3G29160.1,AT3G01090.2 Orysa4|Os05g45420.1  
AT3G10540.1,AT5G04510.1 Orysa4|Os01g65230.1  
AT1G74740.1,AT1G18890.1 Orysa4|Os03g48270.1  
AT2G34180.1,AT5G45810.1,AT1G29230.1,AT4G18700.1 Orysa4|Os01g55450.1,Orysa4|Os05g43840.1  
AT1G60940.1,AT1G10940.1 Orysa4|Os02g34600.1,Orysa4|Os04g35240.1  
AT4G04740.1,AT4G21940.1,AT4G04720.1 Orysa4|Os07g33110.1  
AT5G57630.1 Orysa4|Os02g08140.1  
AT3G53930.1,AT2G37840.1 Orysa4|Os03g16130.1  
AT1G79640.1 Orysa4|Os02g54900.1  
AT2G45490.1 Orysa4|Os03g55620.1  
AT5G56580.1 Orysa4|Os01g32660.1  
AT5G21326.1,AT5G24430.1,AT3G50500.1,AT1G23700.1,AT2G30360.1,AT2G41860.2,AT3G19100.1,AT3G50310.1,AT5G08590.1,AT5G63650.1,AT1G76040.2,AT1G49180.1,AT3G20410.1,AT1G78290.1,AT3G46160.1,AT5G23580.1,AT4G04695.1,AT4G24400.1,AT2G38490.1,AT5G01810.1,AT3G49370.1,AT1G70430.1,AT5G01820.1,AT2G31500.1,AT3G12200.1,AT3G50530.1,AT1G49580.1,AT4G04700.1,AT1G54960.1,AT1G50700.1,AT1G73500.1,AT3G61960.1,AT4G30960.1,AT1G61950.1,AT1G07150.1,AT1G69220.1,AT2G38910.1,AT4G40010.1,AT4G08470.1,AT4G08500.1,AT2G23030.1,AT1G18350.1,AT3G57530.1,AT1G50230.1,AT5G39440.1,AT4G33950.1,AT3G46140.1,AT3G06230.1,AT2G30040.1,AT5G67080.1,AT2G35890.1,AT5G66880.1,AT4G04710.1,AT3G20860.1  
Orysa4|Os03g02980.1,Orysa4|Os03g20380.1,Orysa4|Os12g39630.1,Orysa4|Os07g48760.1,Orysa4|Os03g57510.1,Orysa4|Os01g60910.1,Orysa4|Os12g03970.1,Orysa4|Os09g25100.1,Orysa4|Os07g48090.1,Orysa4|Os10g

06950.1,Orysa4|Os10g41490.1,Orysa4|Os11g04170.1,Orysa4|Os10g06580.1,Orysa4|Os01g55440.1,Orysa4|Os01g10870.1,Orysa4|Os04g27100.1,Orysa4|Os07g42770.1,Orysa4|Os12g30300.1,Orysa4|Os12g30150.1,Orysa4|Os02g08240.1,Orysa4|Os09g33910.1,Orysa4|Os05g41090.1,Orysa4|Os07g09610.1,Orysa4|Os05g26940.1,Orysa4|Os10g06560.1,Orysa4|Os03g50550.1,Orysa4|Os10g06800.1,Orysa4|Os10g39420.1,Orysa4|Os04g47300.1,Orysa4|Os08g34240.1,Orysa4|Os07g06740.1,Orysa4|Os01g64970.1,Orysa4|Os03g03660.1,Orysa4|Os03g49640.1,Orysa4|Os11g02240.1,Orysa4|Os02g37830.1,Orysa4|Os02g06570.1,Orysa4|Os03g55600.1,Orysa4|Os10g06510.1,Orysa4|Os02g58520.1,Orysa4|Os03g17980.1,Orysa4|Os04g59450.1  
AT4G38230.1  
AT5G12090.1  
AT2G43930.1  
AT3G45670.1,AT3G45790.1  
AT2G42550.1,AT2G05060.1  
AT5G27510.1,AT5G27790.1,AT2G40580.1  
AT2G41930.1,AT2G41920.1,AT2G34290.1,AT2G41910.1  
AT2G40560.1,AT2G40500.1  
AT5G57565.1  
Orysa4|Os04g43710.1  
Orysa4|Os06g50030.1  
Orysa4|Os03g21580.1  
Orysa4|Os05g39890.1  
Orysa4|Os02g41980.1  
Orysa4|Os05g35760.1  
Orysa4|Os05g39900.1  
Orysa4|Os04g58990.1  
Orysa4|Os01g18150.1,Orysa4|Os01g42400.1  
Orysa4|Os05g35770.1  
AT5G03070.1 Orysa4|Os01g06470.1  
AT3G06720.1 Orysa4|Os05g06350.1  
AT1G09270.1  
AT4G02150.1,AT1G02690.2  
AT5G52000.1  
AT1G32880.1  
Orysa4|Os01g24060.1,Orysa4|Os01g14950.1  
AT3G18940.1 Orysa4|Os03g55784.1  
AT5G15550.1 Orysa4|Os07g40930.1  
AT4G30820.1 Orysa4|Os06g07480.1  
AT5G14260.1 Orysa4|Os12g13460.1  
AT1G01920.1 Orysa4|Os06g03676.1  
AT3G48040.1,AT5G62880.1 Orysa4|Os02g50860.1,Orysa4|Os06g12790.1  
AT4G35020.1 Orysa4|Os02g58730.1  
AT4G28950.1 Orysa4|Os05g43820.1  
AT2G17800.1,AT3G51300.1,AT4G35950.1  
AT1G20090.1,AT1G75840.1  
Orysa4|Os02g20850.1  
Orysa4|Os11g19800.1  
Orysa4|Os01g35850.1  
Orysa4|Os01g12900.1  
AT1G35620.1 Orysa4|Os02g34530.1,Orysa4|Os04g35290.1  
AT5G58575.1 Orysa4|Os05g28370.1  
AT5G22010.1 Orysa4|Os11g36390.1  
AT5G42710.1 Orysa4|Os03g56430.1  
AT3G24630.1 Orysa4|Os01g12840.1  
AT1G61040.1 Orysa4|Os12g35030.1  
AT4G33030.1 Orysa4|Os05g32140.1  
AT5G59440.1 Orysa4|Os07g44630.1  
AT5G20250.1 Orysa4|Os06g07600.1  
AT3G57520.1 Orysa4|Os07g10840.1,Orysa4|Os03g59430.1  
AT5G40390.1 Orysa4|Os01g07530.1  
AT4G01970.1  
Orysa4|Os12g36870.1  
Orysa4|Os04g40520.1  
AT1G31480.1 Orysa4|Os08g01920.1  
Orysa4|Os07g22390.1  
AT5G24850.1 Orysa4|Os06g45100.1  
AT2G47590.1 Orysa4|Os03g22330.1  
AT2G34260.1 Orysa4|Os07g46620.1  
AT1G65030.1 Orysa4|Os12g42150.1  
AT4G04940.1 Orysa4|Os06g43690.1  
AT1G09770.1 Orysa4|Os04g28090.1  
AT5G52560.1 Orysa4|Os06g48760.1  
AT5G07290.1,AT5G61960.1 Orysa4|Os02g31290.1,Orysa4|Os05g01240.1  
AT1G29400.1 Orysa4|Os02g48790.1  
AT1G67770.1,AT3G26120.1 Orysa4|Os01g68000.1  
AT2G42890.1  
AT4G18120.1  
AT5G07930.1  
AT1G37140.1  
Orysa4|Os09g36140.1  
AT1G13060.1,AT3G26340.1 Orysa4|Os06g06030.1  
AT3G55340.1 Orysa4|Os05g02400.1  
Orysa4|Os03g03140.1  
AT4G05220.1,AT1G61760.1 Orysa4|Os07g34720.1

Orysa4|Os11g37680.1  
 Orysa4|Os04g53650.1  
 AT4G16210.1 Orysa4|Os03g19680.1  
 AT4G32140.1 Orysa4|Os04g55260.1  
 AT3G07080.1 Orysa4|Os06g46820.1  
 AT3G18550.1 Orysa4|Os03g49880.1  
 AT1G68800.1  
 AT2G43950.1 Orysa4|Os02g39600.1,Orysa4|Os12g12370.1  
 AT1G31910.1 Orysa4|Os03g14830.1  
 Orysa4|Os03g48160.1  
 AT3G60370.1 Orysa4|Os07g30800.1  
 AT3G10060.1 Orysa4|Os07g09040.1  
 AT3G55520.1 Orysa4|Os05g38370.1,Orysa4|Os01g62610.1  
 AT1G56170.1 Orysa4|Os02g07450.1,Orysa4|Os06g45640.1  
 AT5G63470.1,AT3G48590.1 Orysa4|Os03g14669.1  
 AT5G38140.1  
 AT1G08970.1,AT1G54830.1  
 AT5G50490.1  
 AT5G50470.1  
 Orysa4|Os08g10560.1  
 Orysa4|Os04g58680.1  
 Orysa4|Os09g30310.1,Orysa4|Os08g38780.1  
 AT1G07480.1,AT1G07470.1 Orysa4|Os05g22670.1  
 AT5G59230.1  
 AT5G21900.1 Orysa4|Os08g35700.1  
 AT2G06040.1  
 AT2G06030.1  
 AT1G31870.1 Orysa4|Os08g08080.1  
 AT2G43210.1 Orysa4|Os11g18880.1  
 AT4G12790.1 Orysa4|Os03g50620.1,Orysa4|Os03g21914.1  
 AT5G22370.1 Orysa4|Os02g34950.1  
 AT1G06720.1 Orysa4|Os03g21530.1  
 AT5G10070.2 Orysa4|Os03g09920.1  
 AT2G40360.1 Orysa4|Os07g25440.1  
 AT5G64410.1 Orysa4|Os01g43940.1  
 AT4G10770.1 Orysa4|Os06g03700.1,Orysa4|Os06g03560.1,Orysa4|Os06g03540.1  
 AT4G26590.1,AT5G55930.1 Orysa4|Os08g38400.1,Orysa4|Os08g23130.1  
 AT4G16370.1 Orysa4|Os03g54000.1  
 AT1G09930.1  
 AT5G53520.1,AT5G53510.1,AT4G27730.1  
 Orysa4|Os02g46850.1  
 Orysa4|Os04g50820.1  
 Orysa4|Os02g46860.1  
 AT2G31300.1,AT2G30910.1 Orysa4|Os02g57220.1  
 AT4G37130.1 Orysa4|Os09g28019.1  
 Orysa4|Os03g55660.1  
 AT1G13120.1 Orysa4|Os02g38250.1  
 AT4G05523.1  
 AT5G65960.1 Orysa4|Os04g49530.1  
 AT5G12200.1 Orysa4|Os01g59340.1  
 AT3G25580.1,AT2G18990.1 Orysa4|Os08g15204.1  
 AT5G06240.1 Orysa4|Os05g02190.1  
 Orysa4|Os08g13219.1  
 AT4G37190.1 Orysa4|Os12g39650.1,Orysa4|Os03g13770.1  
 Orysa4|Os05g31190.1  
 AT3G53260.1,AT3G10340.1,AT2G37040.1  
 Orysa4|Os05g35290.1,Orysa4|Os02g41670.1,Orysa4|Os04g43800.1,Orysa4|Os02g41630.1,Orysa4|Os04g43760.1,Orysa4|Os02g41680.1  
 Orysa4|Os12g33610.1,Orysa4|Os11g48110.1  
 Orysa4|Os08g21670.1  
 AT1G72690.1,AT5G57000.1 Orysa4|Os09g19910.1  
 AT1G17490.1  
 AT2G43470.1 Orysa4|Os11g16420.1  
 AT3G03320.1  
 AT1G12520.1 Orysa4|Os04g48410.1  
 AT1G08030.1 Orysa4|Os06g06370.1  
 AT1G08020.1  
 AT1G53520.1 Orysa4|Os02g21520.1  
 AT3G53490.1 Orysa4|Os03g17440.1  
 AT5G02720.1  
 AT5G51450.1,AT4G25230.1 Orysa4|Os07g30100.1  
 AT5G41960.1 Orysa4|Os04g49610.1  
 AT1G69200.1 Orysa4|Os03g40550.1  
 AT3G54090.1 Orysa4|Os01g63220.1  
 AT1G66430.1 Orysa4|Os06g12600.1  
 AT5G51830.1  
 AT5G58740.1 Orysa4|Os01g47770.1  
 AT3G52640.2 Orysa4|Os02g50360.1  
 AT5G24840.1 Orysa4|Os06g12990.1  
 AT2G35450.1 Orysa4|Os04g32150.1  
 AT2G41705.1 Orysa4|Os10g41749.1  
 AT5G67170.1 Orysa4|Os04g57480.1

AT5G24260.1 Orysa4|Os02g18850.1  
AT3G59090.2 Orysa4|Os01g54784.1  
AT5G12290.1 Orysa4|Os03g26000.1,Orysa4|Os03g26030.1  
Orysa4|Os03g24050.1  
AT1G26550.1 Orysa4|Os09g24540.1  
AT5G19370.1 Orysa4|Os07g48810.1  
AT3G06455.1,AT4G01000.1 Orysa4|Os01g48930.1  
AT1G51350.1 Orysa4|Os11g41990.1  
AT3G03440.1 Orysa4|Os01g02200.1  
AT3G47820.1,AT5G62560.1,AT5G40140.1,AT5G65200.1  
Orysa4|Os09g21740.1,Orysa4|Os06g13080.1,Orysa4|Os06g13090.1  
AT3G18710.1,AT5G09800.1,AT5G64660.1 Orysa4|Os04g34140.1,Orysa4|Os02g33680.1  
AT2G25130.1,AT4G31890.1 Orysa4|Os09g25000.1  
AT2G45920.1,AT3G61390.2 Orysa4|Os10g40120.1,Orysa4|Os10g40490.1  
AT1G08315.1 Orysa4|Os01g72600.1  
AT1G27910.1,AT1G24330.1,AT1G67530.1 Orysa4|Os01g67500.1  
AT2G28830.1,AT3G46510.1 Orysa4|Os03g16824.1,Orysa4|Os12g38210.1  
AT4G21350.1 Orysa4|Os08g04470.1  
AT2G23140.1  
Orysa4|Os03g32100.1,Orysa4|Os09g21120.1,Orysa4|Os02g13960.1,Orysa4|Os02g28720.1,Orysa4|Os04  
g41250.1,Orysa4|Os03g13010.1,Orysa4|Os07g39880.1,Orysa4|Os02g49950.1,Orysa4|Os06g28590.1,Orysa4|Os04g  
28100.1,Orysa4|Os08g01900.1,Orysa4|Os07g39590.1,Orysa4|Os01g60860.1,Orysa4|Os04g35680.1,Orysa4|Os06g5  
1130.1,Orysa4|Os01g66130.1  
AT3G54850.1 Orysa4|Os06g01304.1  
AT5G14510.1,AT4G12710.1  
AT1G01670.1  
AT1G15165.1  
AT3G20170.1  
AT5G67340.1,AT3G01400.1,AT3G54790.1  
AT1G10560.1  
AT4G16490.1  
AT5G58680.1,AT5G18320.1,AT1G71020.1,AT5G18340.1,AT3G07360.1,AT1G23030.1,AT5G18330.1,AT1G29340.1  
AT4G36550.1  
AT5G65920.1,AT3G49810.1  
Orysa4|Os12g01300.1  
Orysa4|Os02g47670.1  
AT3G17090.1 Orysa4|Os03g61690.1  
AT3G51370.1,AT5G66080.1 Orysa4|Os03g04430.1,Orysa4|Os06g50380.1  
AT5G06750.1 Orysa4|Os04g49490.1,Orysa4|Os02g46080.1  
AT4G33920.1 Orysa4|Os12g39120.1  
AT5G02760.1,AT3G12620.1,AT3G55050.1  
AT4G38520.1  
Orysa4|Os03g55320.1  
Orysa4|Os07g02330.1  
Orysa4|Os03g10950.1  
AT5G14140.1 Orysa4|Os11g30484.1  
AT1G29700.1 Orysa4|Os12g44370.1  
AT1G57680.1 Orysa4|Os04g36630.1,Orysa4|Os01g66190.1  
Orysa4|Os08g25830.1  
AT1G72050.2 Orysa4|Os05g03020.1,Orysa4|Os02g02424.1  
AT3G17340.1 Orysa4|Os11g47320.1,Orysa4|Os11g47130.1  
AT4G00720.1 Orysa4|Os10g37740.1  
AT5G26751.1,AT3G05840.1 Orysa4|Os01g14860.1  
AT4G18710.1,AT2G30980.1,AT1G06390.1 Orysa4|Os05g11730.1,Orysa4|Os01g10840.1  
AT1G57870.1,AT1G09840.1 Orysa4|Os03g62500.1  
AT3G61160.2  
AT5G14640.1  
Orysa4|Os01g19150.1,Orysa4|Os05g04340.1  
Orysa4|Os11g20310.1  
Orysa4|Os06g35530.1  
AT1G26170.1 Orysa4|Os06g16280.1  
AT3G17000.1 Orysa4|Os03g19500.1  
AT2G04305.1 Orysa4|Os08g03600.1  
AT4G35250.1 Orysa4|Os08g44000.1  
AT4G37200.1 Orysa4|Os03g55820.1  
AT1G29220.1 Orysa4|Os01g55490.1  
AT2G39940.1 Orysa4|Os05g37690.1,Orysa4|Os01g63420.1,Orysa4|Os03g15880.1  
AT3G26810.1,AT1G12820.1 Orysa4|Os04g32460.1  
AT4G24390.1,AT5G49980.1 Orysa4|Os02g52230.1,Orysa4|Os11g27450.1  
AT4G03190.1,AT3G62980.1 Orysa4|Os05g05800.1  
Orysa4|Os11g31620.1  
Orysa4|Os03g08850.1  
AT2G40800.1,AT3G56430.1 Orysa4|Os01g07382.1  
AT3G57000.1 Orysa4|Os02g18830.1  
AT1G53140.1 Orysa4|Os01g54420.1  
AT3G17300.1 Orysa4|Os12g37850.1  
AT1G03360.1 Orysa4|Os04g43922.1  
AT5G41950.1 Orysa4|Os03g02270.1,Orysa4|Os10g37430.1  
AT5G02120.1 Orysa4|Os12g29570.1,Orysa4|Os05g22730.1  
AT2G27290.1 Orysa4|Os04g33940.1  
AT2G44510.1 Orysa4|Os03g63690.1  
AT5G03830.1

AT1G31500.1 Orysa4|Os05g32330.1  
AT5G11350.1 Orysa4|Os06g15410.1,Orysa4|Os01g42490.1  
AT3G58580.1,AT3G58560.1 Orysa4|Os10g27230.1,Orysa4|Os03g07080.1  
AT1G31530.1  
AT1G73875.1,AT3G18500.1  
AT5G24165.1,AT4G23885.1 Orysa4|Os06g33920.1  
AT2G45620.1 Orysa4|Os10g11034.1  
Orysa4|Os02g02970.1  
AT5G10940.1 Orysa4|Os03g08830.1  
AT1G56500.1 Orysa4|Os03g19760.1  
AT4G09140.1 Orysa4|Os01g72880.1  
AT2G04660.1 Orysa4|Os04g40830.1  
AT3G52740.1 Orysa4|Os02g32990.1,Orysa4|Os04g33610.1  
AT3G44450.1  
AT3G03920.1 Orysa4|Os11g37080.1  
AT5G18180.1  
AT2G38760.1 Orysa4|Os05g31760.1  
AT5G65020.1,AT5G10220.1,AT1G68090.1,AT5G12380.1,AT1G35720.1,AT2G38750.1,AT5G10230.1  
Orysa4|Os09g27990.1,Orysa4|Os05g31750.1,Orysa4|Os07g46550.1,Orysa4|Os06g11800.1,Orysa4|Os01  
g31270.1,Orysa4|Os09g23160.1  
Orysa4|Os09g20330.1  
AT5G15750.1 Orysa4|Os04g56670.1  
AT5G01310.1 Orysa4|Os03g18210.1  
AT1G05720.1 Orysa4|Os01g66960.1  
AT5G50890.1 Orysa4|Os01g54810.1  
Orysa4|Os01g14080.1  
Orysa4|Os01g47610.1  
Orysa4|Os07g39810.1  
AT3G04740.1 Orysa4|Os09g10960.1  
Orysa4|Os08g24400.1  
AT3G12940.1 Orysa4|Os07g31440.1  
AT2G16930.1,AT5G15220.1 Orysa4|Os04g25540.1,Orysa4|Os08g31228.1  
AT4G38900.1,AT2G21230.1 Orysa4|Os08g43090.1  
AT2G31370.1,AT1G06070.1 Orysa4|Os09g34060.1  
AT1G43700.1 Orysa4|Os12g06520.1  
AT2G12900.1,AT2G13150.1  
AT2G21235.1  
Orysa4|Os03g03550.1,Orysa4|Os10g38820.1  
Orysa4|Os04g10260.1  
Orysa4|Os04g10310.1  
Orysa4|Os09g34880.1  
Orysa4|Os04g41820.1  
AT5G07360.1 Orysa4|Os11g33090.1  
AT1G72410.1,AT1G17360.1 Orysa4|Os07g42410.1  
ATMG00090.1 Orysa4|Os12g34070.1,Orysa4|Os12g34130.1  
ATMG00990.1,AT2G07751.1  
AT3G27700.1 Orysa4|Os04g32340.1  
AT5G57040.1 Orysa4|Os07g06660.1  
AT4G08960.1 Orysa4|Os06g11640.1  
AT5G20090.1 Orysa4|Os09g20660.1  
AT4G31770.1 Orysa4|Os03g51540.1  
AT5G57290.1,AT4G25890.1 Orysa4|Os06g48780.1,Orysa4|Os01g13080.1  
AT5G19930.1 Orysa4|Os01g32280.1  
Orysa4|Os01g08290.1  
AT5G03780.1 Orysa4|Os11g06190.1  
AT4G12670.1,AT1G01150.1  
AT5G40280.1 Orysa4|Os01g53600.1  
AT4G35930.1 Orysa4|Os10g30280.1  
AT4G37300.1 Orysa4|Os03g15920.1,Orysa4|Os05g37830.1  
AT5G45900.1 Orysa4|Os01g42850.1  
AT3G17205.1 Orysa4|Os05g06690.1  
AT1G70320.1,AT1G55860.1 Orysa4|Os09g07900.1  
Orysa4|Os12g24080.1  
AT5G22100.1 Orysa4|Os03g61790.1  
AT1G26940.1 Orysa4|Os11g38990.1  
AT2G20310.1,AT4G28690.1 Orysa4|Os03g04740.1,Orysa4|Os10g32850.1  
Orysa4|Os10g42270.1  
AT1G71440.1 Orysa4|Os05g01500.1  
AT1G08460.1 Orysa4|Os05g36920.1,Orysa4|Os05g36930.1  
AT4G21620.1 Orysa4|Os03g47270.1  
AT1G61255.1  
Orysa4|Os07g03180.1  
Orysa4|Os12g43820.1  
AT1G45110.1 Orysa4|Os10g27450.1  
AT5G47790.1 Orysa4|Os08g23680.1  
AT2G34040.1,AT1G29030.1 Orysa4|Os02g20930.1  
AT3G19516.1  
AT4G33540.1 Orysa4|Os02g58260.1,Orysa4|Os02g58270.1  
AT3G04870.1 Orysa4|Os07g10490.1  
AT1G03760.1 Orysa4|Os01g70330.1  
AT1G67410.1 Orysa4|Os01g69220.1  
AT5G16890.1 Orysa4|Os01g59630.1

AT2G35100.1,AT5G44930.1 Orysa4|Os07g37960.1  
AT1G34270.1 Orysa4|Os04g57510.1  
AT3G03650.1,AT3G45400.1 Orysa4|Os11g03410.1,Orysa4|Os03g20850.1,Orysa4|Os12g03100.1  
Orysa4|Os08g34020.1  
AT4G30790.1 Orysa4|Os02g08350.1  
AT5G17550.1,AT3G03490.1 Orysa4|Os02g44220.1  
AT5G39770.1,AT4G30870.1 Orysa4|Os01g71960.1  
AT5G20600.1 Orysa4|Os04g56350.1  
AT2G19880.1 Orysa4|Os01g67870.1  
AT2G21860.1 Orysa4|Os01g51860.1  
AT2G47980.1 Orysa4|Os05g09620.1  
AT3G19990.1 Orysa4|Os02g58150.1  
Orysa4|Os02g58170.1  
AT5G19160.1,AT3G06080.2 Orysa4|Os11g05080.1,Orysa4|Os12g05080.1  
AT5G06700.1,AT3G12060.1 Orysa4|Os06g10560.1  
AT1G48880.1 Orysa4|Os01g65800.1,Orysa4|Os05g35190.1  
AT5G64470.2 Orysa4|Os02g02580.1  
AT5G20680.1 Orysa4|Os12g33194.1,Orysa4|Os12g36750.1,Orysa4|Os11g13800.1  
AT3G28150.1 Orysa4|Os06g12820.1,Orysa4|Os06g12810.1  
AT2G38320.1 Orysa4|Os03g60300.1  
AT2G14530.1 Orysa4|Os07g31550.1  
AT4G25360.1,AT5G51640.1 Orysa4|Os01g68630.1  
AT5G20590.1 Orysa4|Os06g44900.1  
AT5G15890.1,AT5G15900.1 Orysa4|Os01g46400.1,Orysa4|Os06g16170.1,Orysa4|Os01g46410.1  
AT5G58600.1,AT2G30010.1 Orysa4|Os03g18110.1  
AT3G62390.1 Orysa4|Os03g19470.1  
AT2G34070.1,AT1G29050.1 Orysa4|Os01g46350.1  
AT5G01360.1 Orysa4|Os03g18120.1  
AT4G11090.1,AT4G23790.1 Orysa4|Os05g12380.1,Orysa4|Os06g33330.1  
AT3G11030.1,AT2G40320.1 Orysa4|Os03g60350.1  
AT2G37720.1,AT5G64020.1 Orysa4|Os09g23360.1  
AT1G60790.1 Orysa4|Os04g42900.1  
AT1G70230.1 Orysa4|Os09g20850.1,Orysa4|Os06g12870.1  
AT3G55990.1 Orysa4|Os03g18140.1,Orysa4|Os07g49280.1  
AT3G11570.1,AT5G06230.1  
AT3G54260.1  
AT2G30900.1  
AT2G31120.1,AT2G42570.1  
AT1G78710.1  
AT2G31110.1  
AT3G14850.2  
AT1G01430.1,AT4G01080.1  
AT5G01620.1  
AT1G73140.1  
AT2G40160.1,AT2G40150.1  
Orysa4|Os07g46230.1  
Orysa4|Os05g51020.1,Orysa4|Os01g42810.1  
Orysa4|Os02g53380.1  
Orysa4|Os11g01570.1,Orysa4|Os12g01560.1  
Orysa4|Os06g16160.1,Orysa4|Os06g16200.1,Orysa4|Os02g49650.1,Orysa4|Os06g16150.1  
Orysa4|Os06g15560.1  
Orysa4|Os06g16250.1,Orysa4|Os02g49660.1  
Orysa4|Os01g11810.1  
Orysa4|Os06g34060.1  
Orysa4|Os05g28830.1  
Orysa4|Os04g58340.1  
Orysa4|Os06g12830.1,Orysa4|Os06g12840.1,Orysa4|Os06g12850.1,Orysa4|Os06g12860.1  
Orysa4|Os07g15230.1  
Orysa4|Os11g01370.1,Orysa4|Os12g01380.1  
Orysa4|Os05g28630.1  
AT1G21920.1,AT1G77660.1 Orysa4|Os09g28060.1  
AT4G17080.1,AT2G35170.1 Orysa4|Os10g41534.1  
AT1G02170.1  
AT1G02330.1 Orysa4|Os03g25720.1  
AT5G59180.1 Orysa4|Os05g33240.1  
AT3G22900.1,AT4G14660.1 Orysa4|Os05g06490.1  
AT4G14520.1  
AT1G07300.1,AT3G09032.1,AT5G01225.1 Orysa4|Os01g63500.1  
AT3G07140.1 Orysa4|Os11g28980.1  
AT3G04490.1 Orysa4|Os10g33710.1  
AT3G23700.1 Orysa4|Os03g62780.1  
AT4G19490.1 Orysa4|Os04g13470.1  
AT2G37740.1 Orysa4|Os07g01180.1,Orysa4|Os05g20930.1,Orysa4|Os11g48000.1  
AT3G23130.1,AT3G23140.1  
Orysa4|Os05g14130.1,Orysa4|Os02g57550.1,Orysa4|Os03g05490.1,Orysa4|Os04g08600.1  
AT5G43540.1 Orysa4|Os07g23450.1  
AT5G06070.1  
AT4G17810.1  
AT3G53820.1,AT3G09290.1  
AT2G42410.1  
Orysa4|Os04g50070.1  
Orysa4|Os02g01090.1

AT1G70630.1 Orysa4|Os05g43810.1  
AT1G30010.1 Orysa4|Os12g21870.1  
AT5G16210.1 Orysa4|Os01g33060.1  
AT1G64220.1,AT5G41685.1 Orysa4|Os01g43640.1  
AT1G18010.1,AT1G18000.1 Orysa4|Os04g01520.1  
AT5G08290.1 Orysa4|Os10g34520.1  
AT2G47830.1 Orysa4|Os03g22550.1  
AT1G51610.1 Orysa4|Os04g23180.1  
AT4G13010.1 Orysa4|Os04g30420.1  
Orysa4|Os09g32620.1,Orysa4|Os09g32570.1,Orysa4|Os09g32640.1  
Orysa4|Os04g28870.1,Orysa4|Os04g28990.1  
Orysa4|Os04g29030.1  
AT2G25530.1 Orysa4|Os03g63500.1  
AT3G51820.1 Orysa4|Os05g28200.1  
AT1G67680.1,AT1G67650.1 Orysa4|Os01g66560.1  
AT5G02280.1 Orysa4|Os07g27150.1  
AT5G22390.1 Orysa4|Os11g05550.1,Orysa4|Os12g05890.1,Orysa4|Os02g33090.1  
AT4G34310.1 Orysa4|Os03g08700.1  
AT3G18580.1 Orysa4|Os01g45530.1  
AT4G28200.1 Orysa4|Os02g01350.1  
AT4G18980.1,AT1G29640.1,AT2G34340.1,AT5G45630.1 Orysa4|Os01g52730.1  
AT5G03230.1,AT3G45210.1,AT5G60680.1,AT2G28400.1 Orysa4|Os04g43990.1  
AT1G11700.1,AT1G61930.1,AT4G21930.1 Orysa4|Os07g33270.1  
AT4G21970.1  
Orysa4|Os01g54450.1  
Orysa4|Os10g33990.1  
AT2G43980.1 Orysa4|Os09g34300.1  
AT2G36930.1 Orysa4|Os08g45040.1  
AT3G49720.1,AT5G65810.1 Orysa4|Os01g05070.1  
AT3G59520.1 Orysa4|Os01g67040.1  
AT5G53620.1 Orysa4|Os08g43060.1  
AT3G28700.1 Orysa4|Os01g40620.1  
AT5G12310.1,AT5G19430.1 Orysa4|Os01g72480.1  
AT5G15320.1,AT3G01130.1 Orysa4|Os04g02670.1  
AT5G15270.1 Orysa4|Os03g25970.1  
AT5G53060.1 Orysa4|Os06g23460.1  
AT2G22600.1,AT5G09560.1,AT5G46190.1,AT1G51580.1  
Orysa4|Os09g32300.1,Orysa4|Os08g10030.1,Orysa4|Os10g35220.1  
AT2G03110.1,AT1G14170.1  
AT5G64390.1  
Orysa4|Os01g13470.1  
AT5G44730.1 Orysa4|Os02g07730.1,Orysa4|Os06g45440.1  
AT3G48150.1 Orysa4|Os02g43920.1  
Orysa4|Os06g46540.1  
AT5G23120.1 Orysa4|Os06g51330.1  
AT3G63030.1,AT4G22745.1 Orysa4|Os05g33550.1  
AT4G00416.1  
AT5G35330.1 Orysa4|Os09g32090.1,Orysa4|Os06g48870.1  
AT5G35338.2  
AT5G10910.1 Orysa4|Os02g04500.1  
AT2G40190.1 Orysa4|Os12g39340.1  
AT1G02270.1 Orysa4|Os10g13550.1  
AT5G54120.1  
AT5G54130.1  
AT4G13510.1,AT3G24300.1,AT3G24290.1,AT4G28700.1  
Orysa4|Os02g40710.1,Orysa4|Os02g40730.1,Orysa4|Os04g43070.1  
AT1G64780.1  
Orysa4|Os04g28270.1  
AT1G22660.1 Orysa4|Os12g07350.1  
AT3G45880.1 Orysa4|Os09g31050.1  
AT1G28320.1 Orysa4|Os05g41810.1  
AT2G26840.1 Orysa4|Os01g16340.1  
AT3G43910.1  
AT1G19080.1 Orysa4|Os08g17294.1  
AT4G01660.1 Orysa4|Os01g21610.1  
AT3G05210.1 Orysa4|Os10g37490.1  
AT5G61490.1,AT4G25170.1 Orysa4|Os02g44010.1,Orysa4|Os04g46480.1  
AT4G21570.1 Orysa4|Os07g32230.1  
AT1G11200.1  
AT5G14390.1,AT4G24760.1 Orysa4|Os12g18860.1  
AT1G32190.1 Orysa4|Os08g06420.1  
AT1G66900.1,AT5G38220.1 Orysa4|Os01g49510.1  
AT3G01690.1  
AT2G30330.1 Orysa4|Os12g02070.1,Orysa4|Os11g02110.1  
Orysa4|Os12g22760.1  
AT4G08790.1 Orysa4|Os12g31830.1  
AT3G55390.1 Orysa4|Os12g38100.1  
AT3G04600.1 Orysa4|Os12g35570.1  
Orysa4|Os07g17770.1  
AT1G71820.1 Orysa4|Os02g51430.1  
AT4G10330.1 Orysa4|Os01g66320.1,Orysa4|Os11g13880.1  
AT1G70170.1,AT1G59970.1,AT1G24140.1 Orysa4|Os06g13180.1,Orysa4|Os02g50730.1



AT4G16640.1 Orysa4|Os10g40830.1  
AT2G45040.1  
AT5G66450.1,AT3G50920.1 Orysa4|Os02g47570.1  
AT3G57500.1 Orysa4|Os03g48960.1  
Orysa4|Os01g66544.1  
AT1G17160.1 Orysa4|Os01g47550.1  
AT4G27600.1 Orysa4|Os10g42240.1  
AT5G50970.1 Orysa4|Os03g63470.1  
AT5G19920.1  
AT1G75200.1 Orysa4|Os03g56390.1  
Orysa4|Os10g22110.1  
AT1G54410.1 Orysa4|Os03g45280.1  
AT3G28720.1 Orysa4|Os06g38550.1  
AT5G41820.1,AT4G24490.1 Orysa4|Os06g46380.1  
AT1G74970.1 Orysa4|Os03g55930.1  
AT4G33250.1 Orysa4|Os03g08450.1  
AT5G58730.1 Orysa4|Os03g52760.1  
AT3G15820.1,AT3G15830.1 Orysa4|Os06g40500.1  
AT3G52730.1 Orysa4|Os05g33210.1  
AT1G74140.1,AT1G18600.1,AT1G74130.1 Orysa4|Os01g55740.1  
AT1G42440.1 Orysa4|Os11g19250.1  
AT1G30240.1 Orysa4|Os05g22990.1  
Orysa4|Os06g23570.1  
AT5G65000.1 Orysa4|Os02g36390.1  
AT5G41330.1 Orysa4|Os07g23720.1  
AT5G51200.1 Orysa4|Os02g10790.1  
AT4G01310.1 Orysa4|Os03g03360.1  
AT4G22300.1 Orysa4|Os04g57370.1  
Orysa4|Os04g57390.1,Orysa4|Os04g57380.1  
AT5G19180.1 Orysa4|Os01g16540.1  
AT2G21470.2 Orysa4|Os07g39780.1  
AT5G37530.1 Orysa4|Os06g14040.1  
AT4G16440.1 Orysa4|Os03g53750.1  
AT5G53170.1 Orysa4|Os01g43150.1  
AT5G58290.1 Orysa4|Os02g21970.1  
AT5G19990.1,AT5G20000.1 Orysa4|Os02g11050.1  
AT1G50250.1,AT5G42270.1 Orysa4|Os06g51029.1  
AT1G53750.1 Orysa4|Os06g09290.1,Orysa4|Os02g54340.1  
AT1G07510.1,AT2G29080.1 Orysa4|Os01g62500.1,Orysa4|Os05g38400.1  
AT5G15250.1 Orysa4|Os06g12370.1  
AT5G58870.1,AT3G47060.1 Orysa4|Os02g43350.1  
AT2G30950.1,AT1G06430.1 Orysa4|Os06g45820.1  
AT4G04180.1 Orysa4|Os02g50680.1  
AT2G26140.1 Orysa4|Os01g39260.1,Orysa4|Os01g39250.1  
AT1G45000.1,AT5G43010.1 Orysa4|Os02g10640.1,Orysa4|Os06g40560.1  
AT2G20140.1,AT4G29040.1 Orysa4|Os07g49150.1  
AT3G02450.1 Orysa4|Os04g39190.1  
AT5G64580.1  
AT3G16290.1  
AT1G79560.1  
AT3G04340.1  
AT1G53780.1  
AT4G23940.1  
Orysa4|Os01g40820.1  
Orysa4|Os09g38730.1  
Orysa4|Os06g39870.1  
AT1G73930.1 Orysa4|Os03g15390.1  
AT2G31580.1 Orysa4|Os05g45890.1  
AT2G32320.1,AT2G32330.1  
AT1G16840.1,AT1G78890.1 Orysa4|Os08g13320.1  
AT2G19180.1  
Orysa4|Os06g45060.1  
AT1G45010.1,AT1G35180.1,AT1G35170.1 Orysa4|Os01g15770.1  
AT4G02220.1 Orysa4|Os03g18830.1  
Orysa4|Os01g39650.1  
AT1G04230.1,AT5G43720.1 Orysa4|Os03g58340.1  
AT3G03890.1 Orysa4|Os07g38620.1  
AT1G50575.1 Orysa4|Os03g39010.1  
AT2G36080.1,AT5G06250.1,AT3G11580.1 Orysa4|Os11g05740.1,Orysa4|Os03g02900.1  
AT3G61970.1,AT1G01030.1,AT2G46870.1  
AT4G01500.1  
Orysa4|Os02g25830.1  
AT5G05700.1,AT3G11240.1 Orysa4|Os05g37434.1  
AT3G21820.1 Orysa4|Os04g53700.1  
AT3G05810.1 Orysa4|Os01g19400.1  
AT5G26800.1  
Orysa4|Os10g05940.1  
AT1G22230.1,AT1G78110.1 Orysa4|Os09g20420.1  
Orysa4|Os02g51720.1  
AT1G01210.1,AT4G07950.1 Orysa4|Os02g45120.1  
AT5G63460.1 Orysa4|Os12g25640.1,Orysa4|Os11g29340.1  
AT3G07400.1 Orysa4|Os02g28040.1

AT5G23440.1,AT5G08410.1 Orysa4|Os02g42570.1,Orysa4|Os04g44650.1  
AT2G42190.1,AT3G57930.1 Orysa4|Os06g21580.1,Orysa4|Os02g48600.1  
Orysa4|Os09g31446.1  
AT5G14290.1,AT3G01740.1 Orysa4|Os12g14080.1  
AT2G38480.1 Orysa4|Os03g18680.1,Orysa4|Os05g27790.1  
Orysa4|Os07g49200.1,Orysa4|Os03g60250.1  
AT5G01400.1 Orysa4|Os07g49320.1  
AT1G27595.1 Orysa4|Os01g49940.1  
AT5G08420.1 Orysa4|Os10g31520.1,Orysa4|Os01g51620.1  
AT3G57360.1,AT3G02370.1 Orysa4|Os09g32700.1  
AT5G18580.1 Orysa4|Os05g05710.1  
AT1G43860.1 Orysa4|Os08g01620.1  
AT5G24560.1,AT2G02240.1,AT2G02230.1,AT2G02250.1,AT2G02360.1,AT2G02340.1  
Orysa4|Os02g56760.1,Orysa4|Os12g03594.1,Orysa4|Os02g56750.1  
AT1G80110.1  
AT2G02350.1  
Orysa4|Os02g56820.1,Orysa4|Os02g56840.1  
Orysa4|Os04g21130.1  
Orysa4|Os08g05480.1  
Orysa4|Os02g56810.1,Orysa4|Os02g56770.1  
Orysa4|Os09g01890.1  
AT4G14147.1 Orysa4|Os03g63090.1  
AT1G74160.1,AT1G18620.1 Orysa4|Os07g01860.1  
AT5G15580.1,AT3G02170.1  
Orysa4|Os03g30530.1  
AT1G09450.1 Orysa4|Os07g44360.1  
AT1G09980.1,AT1G58350.1 Orysa4|Os12g06800.1  
Orysa4|Os11g06690.1  
AT2G45760.1,AT3G61190.1 Orysa4|Os09g35780.1  
AT1G77710.1 Orysa4|Os01g73140.1  
AT1G06220.1,AT5G25230.1 Orysa4|Os06g40600.1  
AT1G56070.1 Orysa4|Os04g02820.1,Orysa4|Os02g32030.1  
AT3G22980.1 Orysa4|Os02g33850.1,Orysa4|Os03g44780.1  
Orysa4|Os01g53900.1  
AT3G21580.2 Orysa4|Os05g33230.1  
AT4G38750.1 Orysa4|Os10g06610.1  
AT3G11470.1 Orysa4|Os08g14490.1  
AT1G73820.1 Orysa4|Os12g07050.1  
AT5G21920.1 Orysa4|Os03g08080.1  
AT5G03345.1 Orysa4|Os12g37880.1  
AT4G05070.1 Orysa4|Os04g54210.1  
AT2G32760.1 Orysa4|Os06g50110.1  
Orysa4|Os05g41160.1  
AT5G55490.1 Orysa4|Os07g47194.1,Orysa4|Os09g27040.1  
AT3G20010.1,AT1G50410.1 Orysa4|Os08g08220.1  
AT1G05120.1 Orysa4|Os07g32730.1  
AT5G43530.1 Orysa4|Os04g09800.1  
AT1G11100.1,AT1G61140.1 Orysa4|Os01g57110.1  
AT3G16600.1  
AT1G02670.1  
AT4G30770.1 Orysa4|Os11g09030.1  
AT5G07330.1 Orysa4|Os11g32890.1  
AT1G63060.1  
AT5G46390.2 Orysa4|Os01g47450.1  
AT5G08740.1 Orysa4|Os06g11140.1  
AT3G25070.1 Orysa4|Os03g63140.1  
Orysa4|Os04g31030.1,Orysa4|Os02g30190.1  
Orysa4|Os06g43000.1  
AT5G20070.1 Orysa4|Os06g04910.1  
AT5G48545.1 Orysa4|Os12g13120.1  
Orysa4|Os11g18990.1  
AT4G30630.1,AT5G57910.1 Orysa4|Os08g16930.1  
Orysa4|Os09g25410.1  
AT3G24315.1 Orysa4|Os02g44111.1  
AT1G26520.1 Orysa4|Os07g40790.1  
AT1G15730.1,AT1G80480.1 Orysa4|Os02g55630.1  
Orysa4|Os07g40404.1  
Orysa4|Os04g51100.1  
AT1G08110.4 Orysa4|Os05g22970.1  
AT1G49980.1 Orysa4|Os03g42010.1  
AT1G16340.1,AT1G79500.1 Orysa4|Os12g10784.1  
AT2G04700.1 Orysa4|Os09g07570.1  
AT4G22190.1 Orysa4|Os11g30430.1  
Orysa4|Os01g69290.1  
AT1G63610.2 Orysa4|Os02g58650.1  
AT5G39600.1 Orysa4|Os02g18090.1  
AT3G11980.1 Orysa4|Os03g07140.1  
AT3G44540.1,AT3G44550.1,AT3G44560.1,AT5G22500.1  
Orysa4|Os08g44360.1,Orysa4|Os04g28620.1,Orysa4|Os08g20200.1,Orysa4|Os07g30600.1,Orysa4|Os09  
g39410.1  
AT3G56700.1  
AT3G60060.1

AT4G33790.1  
AT5G22420.1  
Orysa4|Os04g28600.1,Orysa4|Os04g28520.1  
Orysa4|Os04g28690.1  
Orysa4|Os07g23340.1  
Orysa4|Os04g28680.1  
AT4G03240.1 Orysa4|Os01g57460.1  
AT4G11990.1,AT4G22860.1 Orysa4|Os06g03980.1  
AT5G62240.1  
AT2G30820.1,AT1G06660.1 Orysa4|Os03g56590.1  
Orysa4|Os06g45870.1,Orysa4|Os02g07180.1  
AT1G34355.1 Orysa4|Os11g07050.1  
AT5G65650.1,AT4G36660.1 Orysa4|Os07g41660.1  
AT5G61970.1 Orysa4|Os08g23360.1  
AT3G11220.1 Orysa4|Os06g43280.1  
AT5G22870.1 Orysa4|Os02g44670.1  
AT4G01410.1 Orysa4|Os09g36210.1,Orysa4|Os05g30490.1  
AT3G11660.1,AT5G06330.1,AT3G52470.1,AT2G35970.1,AT4G09590.1,AT3G44220.1,AT2G35960.1,AT5G22200.1  
Orysa4|Os11g05860.1,Orysa4|Os12g06260.1,Orysa4|Os08g01220.1,Orysa4|Os02g33550.1,Orysa4|Os04g33990.1  
AT5G05657.1  
AT5G53730.1  
AT2G27270.1  
Orysa4|Os10g39970.1  
Orysa4|Os04g58860.1  
AT4G21190.1 Orysa4|Os01g55290.1  
AT1G04590.2 Orysa4|Os12g02950.1  
AT5G46020.1 Orysa4|Os01g54920.1  
Orysa4|Os05g43970.1  
AT1G48420.1 Orysa4|Os02g53330.1  
AT3G26115.2 Orysa4|Os01g50060.1  
AT2G20825.1,AT4G28190.1 Orysa4|Os01g57240.1  
Orysa4|Os05g42290.1  
AT5G49410.1 Orysa4|Os08g27140.1  
AT5G16540.1,AT3G02830.1 Orysa4|Os01g68860.1,Orysa4|Os12g21700.1,Orysa4|Os11g28270.1  
AT2G32930.1,AT5G63260.1,AT3G12680.1,AT3G48440.1,AT1G04990.1 Orysa4|Os01g42970.1  
AT2G47850.1,AT5G18550.1 Orysa4|Os01g15460.1,Orysa4|Os01g15350.1  
AT1G29600.1  
AT1G48195.1  
AT3G06410.1  
Orysa4|Os12g18120.1  
Orysa4|Os12g03554.1  
Orysa4|Os06g32720.1  
AT5G19910.1 Orysa4|Os07g07020.1,Orysa4|Os10g41450.1  
AT3G09090.1 Orysa4|Os03g61050.1  
AT1G78540.1,AT1G17040.1 Orysa4|Os10g41770.1  
AT1G03330.1 Orysa4|Os08g05850.1  
AT5G64250.2 Orysa4|Os08g37874.1  
AT1G17850.1 Orysa4|Os03g64350.1  
AT5G48150.1 Orysa4|Os10g22430.1,Orysa4|Os03g09280.1,Orysa4|Os07g39470.1  
AT3G54220.1 Orysa4|Os11g03110.1,Orysa4|Os12g02870.1  
AT4G08250.1 Orysa4|Os03g15680.1  
AT3G49950.1 Orysa4|Os07g40020.1  
AT5G41920.1 Orysa4|Os07g38030.1  
AT4G37650.1 Orysa4|Os07g39820.1,Orysa4|Os03g31880.1  
AT2G37650.1 Orysa4|Os03g48450.1,Orysa4|Os12g38490.1,Orysa4|Os01g62460.1  
AT1G21450.1 Orysa4|Os01g65900.1  
AT1G63100.1 Orysa4|Os06g03710.1  
AT5G52510.1 Orysa4|Os04g49110.1,Orysa4|Os02g45760.1  
AT3G50650.1,AT5G66770.1 Orysa4|Os03g51330.1  
AT1G14920.1,AT2G01570.1 Orysa4|Os03g49990.1  
AT1G50420.1 Orysa4|Os01g71970.1  
AT1G55580.1 Orysa4|Os02g10360.1,Orysa4|Os06g40780.1  
AT3G13840.1 Orysa4|Os03g29480.1  
AT2G04890.1  
AT4G17230.1  
AT1G50600.1  
AT5G67411.1  
AT5G59450.1,AT3G46600.1  
AT1G07530.1  
AT2G29060.1,AT1G07520.1  
AT1G66350.1,AT5G17490.1,AT3G03450.1  
Orysa4|Os07g36170.1  
Orysa4|Os05g40710.1  
Orysa4|Os11g06180.1  
Orysa4|Os05g42130.1  
Orysa4|Os04g35250.1  
Orysa4|Os11g47890.1,Orysa4|Os11g47910.1,Orysa4|Os04g50060.1,Orysa4|Os11g47870.1  
Orysa4|Os03g40080.1  
Orysa4|Os07g16330.1,Orysa4|Os03g37900.1  
Orysa4|Os12g06540.1  
Orysa4|Os01g67670.1,Orysa4|Os01g67650.1

Orysa4|Os01g45860.1,Orysa4|Os05g49930.1  
Orysa4|Os11g04590.1,Orysa4|Os11g04570.1,Orysa4|Os12g04380.1,Orysa4|Os12g04370.1  
Orysa4|Os06g10900.1,Orysa4|Os05g31420.1  
AT1G31360.1 Orysa4|Os11g48090.1  
AT3G05740.1 Orysa4|Os11g44910.1  
AT4G35740.1 Orysa4|Os02g54020.1  
AT1G27880.1 Orysa4|Os04g40970.1  
AT1G60930.1,AT1G10930.1 Orysa4|Os04g35420.1  
Orysa4|Os07g48360.1  
AT5G64930.1 Orysa4|Os01g68970.1,Orysa4|Os02g53070.1  
AT5G22110.1 Orysa4|Os08g36330.1,Orysa4|Os05g06840.1  
AT5G59350.1 Orysa4|Os11g47730.1  
AT2G39560.1  
AT3G13235.1 Orysa4|Os02g10510.1  
AT2G21385.1 Orysa4|Os09g36130.1  
AT1G17330.1 Orysa4|Os10g34470.1  
AT5G05930.1 Orysa4|Os05g37950.1  
AT5G42080.1 Orysa4|Os01g48900.1,Orysa4|Os05g48240.1  
AT4G33650.1,AT2G14120.1 Orysa4|Os01g69130.1  
AT3G60190.1 Orysa4|Os10g41820.1  
AT3G61760.1  
AT2G44590.3  
Orysa4|Os04g31190.1  
Orysa4|Os09g39960.1  
AT4G32770.1 Orysa4|Os02g17650.1  
AT5G13420.1 Orysa4|Os01g70170.1  
AT1G15390.1 Orysa4|Os01g37510.1  
AT4G28100.1,AT3G18050.1 Orysa4|Os06g30210.1  
AT5G60340.1 Orysa4|Os07g22950.1  
AT5G61340.1 Orysa4|Os12g32260.1,Orysa4|Os12g38810.1  
AT2G43760.1 Orysa4|Os02g04740.1  
AT1G66200.1,AT5G16570.1,AT5G37600.1 Orysa4|Os02g50240.1  
AT5G35630.1 Orysa4|Os04g56400.1  
AT1G48470.1,AT3G17820.1  
Orysa4|Os03g50490.1  
AT1G60430.1 Orysa4|Os02g14000.1  
AT1G53490.1 Orysa4|Os02g13810.1  
AT5G51720.1 Orysa4|Os07g28400.1  
AT3G56510.1 Orysa4|Os07g46760.1  
Orysa4|Os05g03870.1  
AT3G60210.1,AT2G44650.1 Orysa4|Os10g41710.1  
AT5G14910.1 Orysa4|Os05g27100.1  
AT4G38020.1 Orysa4|Os03g48050.1  
AT3G60070.1 Orysa4|Os03g07170.1,Orysa4|Os07g39010.1  
AT2G44280.1  
AT1G53345.1 Orysa4|Os02g45950.1  
AT5G09580.1 Orysa4|Os11g06670.1  
AT1G47240.1,AT2G23150.1 Orysa4|Os12g39180.1  
AT1G80830.1,AT1G15960.1 Orysa4|Os06g46310.1  
AT5G67330.1  
AT4G18790.1  
Orysa4|Os03g41070.1  
Orysa4|Os03g41064.1  
Orysa4|Os03g11010.1  
Orysa4|Os01g53210.1  
Orysa4|Os01g31870.1,Orysa4|Os07g15370.1,Orysa4|Os02g03900.1,Orysa4|Os07g15460.1  
AT2G35200.1,AT1G32690.1 Orysa4|Os02g15670.1,Orysa4|Os02g46620.1,Orysa4|Os04g50176.1  
AT1G09150.1 Orysa4|Os01g21180.1  
AT4G24590.1,AT5G49710.3 Orysa4|Os02g54080.1  
AT4G00450.1 Orysa4|Os07g45400.1,Orysa4|Os10g40260.1  
AT1G67700.2 Orysa4|Os02g38820.1  
AT1G42550.1 Orysa4|Os09g38090.1  
Orysa4|Os10g39430.1  
AT5G19050.1 Orysa4|Os07g11060.1  
AT5G16550.1 Orysa4|Os08g32980.1  
Orysa4|Os09g23170.1  
AT2G42120.1 Orysa4|Os03g03650.1  
AT5G13190.1 Orysa4|Os02g31100.1  
AT4G09610.1,AT4G09600.1 Orysa4|Os05g35690.1  
AT5G15230.1,AT1G74670.1 Orysa4|Os05g31280.1  
AT2G30810.1 Orysa4|Os09g24840.1  
AT2G18420.1,AT1G75750.1  
AT1G22690.1  
AT3G02885.1  
Orysa4|Os06g51320.1  
Orysa4|Os06g15620.1  
AT4G10760.1 Orysa4|Os02g45110.1  
AT1G06240.1 Orysa4|Os01g11590.1  
AT2G44850.1 Orysa4|Os02g43810.1  
AT3G60150.1,AT2G44525.1 Orysa4|Os10g42090.1  
AT4G18230.1 Orysa4|Os03g30934.1  
AT1G62850.1 Orysa4|Os03g14510.1

AT1G62855.1  
AT5G62030.1 Orysa4|Os02g57050.1  
AT4G32910.1 Orysa4|Os01g54240.1  
AT4G11600.1 Orysa4|Os02g44500.1,Orysa4|Os04g46960.1  
AT4G31870.1,AT2G25080.1 Orysa4|Os06g08670.1  
AT1G63460.1  
AT3G05040.1 Orysa4|Os01g26160.1  
AT5G19940.1 Orysa4|Os04g51792.1  
AT2G41150.2,AT3G56750.1 Orysa4|Os03g25110.1  
Orysa4|Os07g44700.1  
AT5G07630.1 Orysa4|Os07g30250.1  
AT3G02710.1 Orysa4|Os02g58460.1  
AT1G79150.1 Orysa4|Os06g30320.1  
AT1G79140.1  
AT4G02620.1 Orysa4|Os04g05080.1  
AT2G48080.1,AT4G02940.1 Orysa4|Os05g33310.1  
AT2G32720.1 Orysa4|Os05g01820.1,Orysa4|Os01g73990.1  
AT1G26340.1  
AT5G48810.1  
AT5G53560.1  
AT2G46650.1  
AT1G75530.1,AT1G60700.1,AT3G54350.1 Orysa4|Os07g09320.1,Orysa4|Os03g58640.1  
AT1G67420.1 Orysa4|Os07g19530.1  
AT4G05450.1,AT4G21090.1 Orysa4|Os07g01930.1  
AT4G38090.1 Orysa4|Os08g37310.1  
AT3G58140.1 Orysa4|Os12g34860.1  
AT4G39280.1 Orysa4|Os10g26130.1  
AT2G05210.1,AT5G06310.1 Orysa4|Os04g39280.1  
AT1G52825.1,AT4G14615.1 Orysa4|Os07g08410.1  
AT4G15520.1 Orysa4|Os05g04940.1  
AT1G33490.1,AT4G10140.1 Orysa4|Os05g01510.1  
AT5G26880.1 Orysa4|Os08g39600.1  
AT1G43690.1 Orysa4|Os04g34440.1  
AT1G76200.1 Orysa4|Os06g50970.1  
Orysa4|Os05g03150.1  
AT2G45730.1 Orysa4|Os04g02150.1  
AT2G45450.1,AT3G60890.1 Orysa4|Os09g34890.1  
AT2G01120.1 Orysa4|Os01g49010.1  
AT1G58440.1 Orysa4|Os03g12910.1,Orysa4|Os03g12900.1  
AT5G24150.1,AT5G24160.1,AT5G24140.1  
AT2G22830.1,AT4G37760.1  
AT5G24155.1  
AT5G41010.1 Orysa4|Os07g01450.1  
Orysa4|Os05g05980.1  
AT1G08640.1 Orysa4|Os10g33790.1,Orysa4|Os08g03380.1  
AT1G49380.1 Orysa4|Os03g55970.1  
AT5G11960.1 Orysa4|Os01g51190.1  
AT2G34090.2 Orysa4|Os01g42800.1  
AT3G21110.1 Orysa4|Os09g29190.1  
AT2G05310.1,AT4G13500.1 Orysa4|Os03g39830.1  
AT3G20320.1 Orysa4|Os01g74280.1  
AT1G72970.1 Orysa4|Os08g31030.1,Orysa4|Os09g19930.1  
AT1G12570.1 Orysa4|Os10g38050.1,Orysa4|Os02g45530.1,Orysa4|Os03g02700.1,Orysa4|Os04g48400.1  
AT1G73050.1 Orysa4|Os06g44540.1  
AT1G14185.1,AT1G14190.1  
AT5G51950.1,AT3G56060.1,AT5G51930.1  
Orysa4|Os05g49000.1  
AT2G15270.1 Orysa4|Os09g01690.1  
AT3G42150.1,AT1G21930.1 Orysa4|Os12g29670.1  
AT3G45740.1 Orysa4|Os03g17590.1  
AT3G04460.1 Orysa4|Os10g32960.1  
AT1G01910.1 Orysa4|Os09g34970.1  
AT1G71190.1 Orysa4|Os01g73120.1  
AT5G11870.1 Orysa4|Os01g10100.1  
AT5G28500.1,AT3G04550.1 Orysa4|Os10g30870.1  
AT4G29960.1 Orysa4|Os04g51780.1  
AT1G52780.1 Orysa4|Os01g08170.1,Orysa4|Os07g39240.1  
Orysa4|Os07g39250.1  
AT4G10050.1 Orysa4|Os04g36620.1  
AT2G31305.1 Orysa4|Os04g22860.1,Orysa4|Os05g18774.1  
AT3G48470.1 Orysa4|Os02g38680.1  
AT1G78010.1 Orysa4|Os08g31460.1  
AT5G65220.1 Orysa4|Os02g51790.1  
AT5G62950.1,AT3G28956.1 Orysa4|Os12g30510.1  
AT2G07681.1,ATMG00900.1,AT2G07771.2 Orysa4|Os12g34010.1  
AT4G11860.1 Orysa4|Os06g49800.1  
AT4G22960.1  
AT5G57280.1 Orysa4|Os02g56020.1  
AT1G22860.1 Orysa4|Os05g01360.1  
AT4G36630.2 Orysa4|Os03g50740.1  
Orysa4|Os09g25860.1  
AT3G26580.1 Orysa4|Os03g31490.1

AT1G29040.1 Orysa4|Os01g42770.1  
AT3G27890.1 Orysa4|Os01g72460.1,Orysa4|Os01g72430.1  
AT3G49000.1 Orysa4|Os01g48720.1  
AT1G03150.1 Orysa4|Os03g49230.1  
AT3G06960.1 Orysa4|Os01g14820.1  
AT2G44640.1  
AT2G31410.1 Orysa4|Os02g38190.1  
AT5G51540.1 Orysa4|Os06g47210.1  
AT1G48850.1 Orysa4|Os03g14990.1  
AT2G21150.1 Orysa4|Os09g36480.1  
AT3G11720.1,AT5G06440.3 Orysa4|Os11g36070.1  
AT5G24350.1 Orysa4|Os12g13150.1  
AT1G16570.1 Orysa4|Os06g36890.1,Orysa4|Os03g08300.1  
AT2G39440.1 Orysa4|Os02g07240.1  
AT2G42760.1 Orysa4|Os02g38860.1,Orysa4|Os06g35770.1  
Orysa4|Os01g13930.1  
AT5G14250.1 Orysa4|Os08g02550.1  
AT1G49140.1,AT3G18410.1 Orysa4|Os10g42540.1  
AT3G07180.1 Orysa4|Os01g67960.1  
AT4G02530.1 Orysa4|Os06g49160.1  
AT1G31860.1 Orysa4|Os01g16940.1  
AT1G26640.1 Orysa4|Os01g55890.1  
AT1G02410.1 Orysa4|Os03g50940.1  
AT1G33470.1 Orysa4|Os01g65550.1,Orysa4|Os01g72834.1  
AT1G76460.1,AT1G20880.1 Orysa4|Os02g48340.1  
AT1G22330.1,AT1G78260.1 Orysa4|Os06g11730.1,Orysa4|Os02g51890.1  
AT3G54770.1 Orysa4|Os03g17760.1  
AT2G46780.1  
AT1G22910.3  
AT5G53720.1  
Orysa4|Os06g41790.1  
Orysa4|Os03g14190.1  
AT2G36740.1 Orysa4|Os08g09320.1  
AT5G13390.1 Orysa4|Os11g32470.1  
AT2G37120.1,AT3G53370.1,AT3G09735.1 Orysa4|Os04g33420.1  
AT5G25080.1 Orysa4|Os08g16880.1  
AT2G41620.1,AT3G57350.1 Orysa4|Os03g22690.1  
AT1G52510.1 Orysa4|Os04g55180.1  
AT5G59140.1 Orysa4|Os11g48030.1  
AT1G30540.1 Orysa4|Os09g04800.1,Orysa4|Os07g05380.1  
AT4G38960.1,AT2G21320.1 Orysa4|Os09g35880.1  
AT1G06040.1,AT2G31380.1 Orysa4|Os02g39360.1,Orysa4|Os04g41560.1  
AT4G39070.1,AT1G75540.1 Orysa4|Os04g45690.1,Orysa4|Os02g43170.1,Orysa4|Os06g49880.1  
AT1G78600.1 Orysa4|Os06g05890.1,Orysa4|Os05g11510.1,Orysa4|Os01g10580.1  
AT4G10240.1  
Orysa4|Os12g10660.1  
AT2G39910.1 Orysa4|Os06g47900.1  
AT3G10550.1,AT5G04540.1 Orysa4|Os08g44260.1  
AT3G48540.1 Orysa4|Os01g55974.1  
AT1G22270.1,AT1G78190.1 Orysa4|Os07g43020.1  
AT2G34980.1 Orysa4|Os02g40870.1  
AT3G12150.1 Orysa4|Os02g10160.1  
AT5G09830.1 Orysa4|Os01g64680.1  
AT4G12590.1 Orysa4|Os09g32220.1  
AT5G54600.1 Orysa4|Os06g46930.1  
AT2G23360.1 Orysa4|Os04g55570.1  
AT3G05270.1,AT1G77580.2 Orysa4|Os07g32340.1,Orysa4|Os12g07160.1,Orysa4|Os11g06910.1  
AT1G19835.1,AT1G47900.1 Orysa4|Os10g07480.1,Orysa4|Os03g14250.1  
AT1G21810.1  
AT4G36120.1  
AT2G24470.1  
Orysa4|Os02g40100.1,Orysa4|Os04g42610.1  
AT5G44650.1 Orysa4|Os01g58470.1  
AT2G14660.1 Orysa4|Os03g47260.1  
Orysa4|Os05g34590.1,Orysa4|Os08g37860.1  
AT3G52770.1 Orysa4|Os04g33560.1,Orysa4|Os02g32850.1  
Orysa4|Os12g05560.1,Orysa4|Os11g05430.1  
AT3G12870.1 Orysa4|Os03g56700.1  
AT4G31130.1 Orysa4|Os05g02990.1  
Orysa4|Os05g38960.1  
AT1G02910.1 Orysa4|Os01g25600.1  
AT3G05760.1 Orysa4|Os03g61640.1  
AT3G60740.1 Orysa4|Os10g36490.1  
AT4G35450.1,AT2G17390.1 Orysa4|Os03g63480.1,Orysa4|Os08g42690.1,Orysa4|Os09g33810.1  
AT5G12320.1 Orysa4|Os07g46500.1  
AT5G56740.1 Orysa4|Os09g17850.1  
AT5G23290.1 Orysa4|Os10g34670.1  
AT4G16566.1 Orysa4|Os04g45280.1  
AT5G35430.1 Orysa4|Os09g03600.1  
AT5G58005.1 Orysa4|Os08g34270.1  
AT4G28660.1 Orysa4|Os01g71190.1  
AT1G77620.1 Orysa4|Os03g15580.1

AT1G21640.1 Orysa4|Os11g08670.1  
Orysa4|Os11g08590.1  
AT4G06536.1 Orysa4|Os02g40110.1  
AT4G06534.1  
AT1G14910.1,AT2G01600.1 Orysa4|Os05g47550.1,Orysa4|Os01g50010.1  
AT5G35200.1 Orysa4|Os02g55970.1,Orysa4|Os06g07830.1  
AT5G57200.1,AT4G25940.1 Orysa4|Os02g07900.1,Orysa4|Os06g45050.1  
AT1G33340.1 Orysa4|Os11g14000.1  
Orysa4|Os06g48630.1  
AT1G55300.2 Orysa4|Os05g28010.1  
AT5G64180.1 Orysa4|Os12g31790.1  
AT1G73970.1 Orysa4|Os02g03090.1  
AT3G15190.1 Orysa4|Os01g48690.1  
AT5G55210.1,AT4G22320.1 Orysa4|Os08g25080.1,Orysa4|Os09g11240.1  
AT1G31600.1 Orysa4|Os04g51360.1  
AT2G20930.1 Orysa4|Os09g36976.1  
AT1G53000.1 Orysa4|Os05g48750.1  
AT5G10320.1 Orysa4|Os04g37810.1  
AT3G04710.1 Orysa4|Os05g01310.1  
Orysa4|Os02g29190.1,Orysa4|Os08g13640.1,Orysa4|Os12g40780.1,Orysa4|Os02g29140.1,Orysa4|Os12  
g40770.1,Orysa4|Os03g42350.1,Orysa4|Os03g47620.1,Orysa4|Os02g29160.1,Orysa4|Os02g29130.1,Orysa4|Os02g  
29210.1,Orysa4|Os09g03680.1,Orysa4|Os03g47650.1,Orysa4|Os09g03630.1,Orysa4|Os09g03750.1  
Orysa4|Os02g29100.1,Orysa4|Os03g47670.1,Orysa4|Os12g43940.1,Orysa4|Os03g47686.1,Orysa4|Os01  
g07980.1,Orysa4|Os03g47720.1  
Orysa4|Os02g29040.1,Orysa4|Os12g43840.1  
Orysa4|Os03g47640.1  
Orysa4|Os02g29110.1  
Orysa4|Os01g09370.1,Orysa4|Os01g07640.1  
Orysa4|Os08g23590.1  
AT1G18640.1 Orysa4|Os12g31820.1,Orysa4|Os11g41160.1  
AT4G17650.1 Orysa4|Os01g56560.1  
AT2G47370.1,AT2G16760.1 Orysa4|Os03g19452.1,Orysa4|Os10g30620.1  
AT5G28660.1  
AT2G01410.1 Orysa4|Os01g42140.1  
AT2G06010.1 Orysa4|Os04g36850.1  
AT3G09310.1 Orysa4|Os11g47930.1,Orysa4|Os02g15970.1  
AT4G18540.1 Orysa4|Os01g42760.1  
AT3G31980.1,AT5G37110.1  
Orysa4|Os11g38300.1,Orysa4|Os01g62100.1,Orysa4|Os12g27370.1,Orysa4|Os07g02230.1,Orysa4|Os10  
g31990.1  
AT1G35940.1,AT3G30560.1,AT3G42100.1,AT3G13250.1,AT2G05080.1  
Orysa4|Os07g45750.1,Orysa4|Os08g24450.1,Orysa4|Os05g02090.1,Orysa4|Os11g41190.1,Orysa4|Os11  
g44830.1,Orysa4|Os11g13920.1,Orysa4|Os11g40920.1,Orysa4|Os10g32030.1,Orysa4|Os05g44786.1,Orysa4|Os01g  
14200.1  
AT1G64410.1,AT5G28780.1  
AT5G32070.1,AT4G03916.1,AT3G30420.1,AT1G52960.1,AT3G51700.1  
AT3G51690.1  
AT5G34540.1,AT4G07800.1  
AT3G43350.1,AT3G42340.1  
AT3G42320.1,AT3G43330.1  
AT1G54430.1  
Orysa4|Os11g47410.1  
Orysa4|Os12g16630.1  
Orysa4|Os08g20520.1,Orysa4|Os10g01780.1,Orysa4|Os02g16300.1  
Orysa4|Os09g08960.1,Orysa4|Os05g23690.1  
Orysa4|Os04g05800.1,Orysa4|Os10g22130.1  
Orysa4|Os07g09300.1  
Orysa4|Os09g04980.1,Orysa4|Os12g23030.1,Orysa4|Os01g45880.1  
Orysa4|Os07g10070.1,Orysa4|Os08g41070.1  
Orysa4|Os05g14380.1,Orysa4|Os01g16130.1,Orysa4|Os07g44670.1  
Orysa4|Os07g25650.1,Orysa4|Os06g36060.1,Orysa4|Os02g26510.1,Orysa4|Os12g17690.1,Orysa4|Os12  
g25260.1  
Orysa4|Os10g35880.1  
Orysa4|Os01g29390.1,Orysa4|Os01g19460.1  
Orysa4|Os11g12570.1  
AT3G24495.1 Orysa4|Os01g08540.1  
AT4G25540.1 Orysa4|Os04g58630.1  
AT4G02070.1 Orysa4|Os09g24220.1  
AT3G20475.1  
AT1G08780.1 Orysa4|Os03g43020.1  
AT1G35220.1 Orysa4|Os01g19760.1  
AT4G22930.1 Orysa4|Os01g54370.1  
AT3G02660.1 Orysa4|Os01g31610.1  
AT3G59670.1 Orysa4|Os05g30340.1,Orysa4|Os05g30210.1  
AT3G50040.1  
AT1G14300.1 Orysa4|Os10g26660.1  
AT3G25470.1 Orysa4|Os11g14230.1  
AT3G07130.1 Orysa4|Os03g63074.1  
AT3G52780.1,AT3G52820.1  
Orysa4|Os03g37130.1,Orysa4|Os04g33530.1,Orysa4|Os11g05410.1,Orysa4|Os12g05540.1  
AT2G32770.3  
AT3G20500.1

Orysa4|Os08g17784.1  
 AT5G25480.1 Orysa4|Os01g42630.1  
 AT2G32590.1 Orysa4|Os01g34870.1  
 AT3G50685.1 Orysa4|Os10g15300.1  
 AT2G26970.1 Orysa4|Os02g26660.1  
 Orysa4|Os04g23830.1  
 AT1G52590.1 Orysa4|Os01g07800.1  
 AT5G41850.1 Orysa4|Os05g12330.1  
 AT1G09870.1 Orysa4|Os03g60370.1  
 AT1G75350.1 Orysa4|Os01g44210.1  
 AT2G18650.1,AT4G30400.1 Orysa4|Os08g34550.1  
 AT5G40250.1 Orysa4|Os02g50930.1,Orysa4|Os06g12680.1  
 AT5G57750.1  
 AT1G23980.1  
 Orysa4|Os02g54830.1,Orysa4|Os06g08820.1  
 Orysa4|Os09g20980.1,Orysa4|Os06g07100.1  
 AT5G13240.1 Orysa4|Os04g56730.1  
 AT3G03070.1 Orysa4|Os08g06430.1  
 AT5G08565.1,AT5G63670.1 Orysa4|Os07g43060.1  
 AT1G80910.1,AT1G16020.1 Orysa4|Os08g33076.1  
 AT3G24200.2 Orysa4|Os03g62260.1  
 AT5G55960.1 Orysa4|Os06g19390.1  
 AT3G10690.1 Orysa4|Os03g59750.1  
 AT1G04620.1 Orysa4|Os04g25400.1  
 AT1G02100.1 Orysa4|Os06g04820.1  
 AT5G05310.3 Orysa4|Os12g02100.1  
 AT3G23430.1 Orysa4|Os02g56510.1  
 AT1G68740.1 Orysa4|Os01g02000.1,Orysa4|Os06g29790.1  
 AT1G69480.1,AT2G03260.1,AT1G26730.1,AT2G03240.1,AT3G29060.1,AT2G03250.1,AT1G14040.1,AT1G35350.1,A  
 T4G25350.1  
 AT1G55325.1 Orysa4|Os05g37500.1  
 AT4G32820.1 Orysa4|Os03g48100.1  
 AT2G19450.1 Orysa4|Os05g10810.1  
 Orysa4|Os06g36800.1  
 AT1G79810.1 Orysa4|Os05g19480.1  
 AT3G57990.1 Orysa4|Os09g31458.1  
 Orysa4|Os04g48600.1  
 Orysa4|Os09g10690.1  
 AT5G49650.1 Orysa4|Os07g44660.1  
 AT4G32690.1 Orysa4|Os06g39140.1  
 AT3G24140.1 Orysa4|Os05g50900.1  
 AT3G06120.1 Orysa4|Os05g51820.1  
 AT5G53210.1 Orysa4|Os02g15760.1,Orysa4|Os06g33450.1  
 AT1G22490.1,AT1G72210.1  
 Orysa4|Os08g37730.1,Orysa4|Os10g23050.1,Orysa4|Os09g29360.1,Orysa4|Os03g08930.1  
 AT5G65320.1  
 AT2G46810.1,AT4G01460.1,AT3G61950.1  
 Orysa4|Os02g52190.1  
 Orysa4|Os04g50090.1,Orysa4|Os02g46560.1  
 AT2G24090.1 Orysa4|Os06g43900.1  
 AT1G64430.1 Orysa4|Os08g24390.1  
 AT3G25100.1 Orysa4|Os11g03430.1,Orysa4|Os12g03130.1  
 AT2G36230.1 Orysa4|Os05g33260.1  
 AT1G11400.1 Orysa4|Os03g15560.1  
 AT5G03370.1 Orysa4|Os06g15380.1,Orysa4|Os06g15390.1  
 AT1G68660.1 Orysa4|Os08g33540.1  
 AT4G09620.1 Orysa4|Os03g62240.1  
 AT5G47830.1 Orysa4|Os02g06390.1  
 AT2G45640.1 Orysa4|Os02g02960.1  
 AT1G20080.1 Orysa4|Os09g36770.1,Orysa4|Os02g25060.1  
 AT5G04220.2 Orysa4|Os06g47130.1  
 AT2G20990.1  
 AT2G21010.1  
 AT2G21040.1  
 Orysa4|Os01g60340.1  
 AT5G40500.1 Orysa4|Os04g40670.1  
 AT5G04440.1 Orysa4|Os03g05320.1  
 AT1G78995.1 Orysa4|Os06g49070.1  
 Orysa4|Os02g04550.1  
 AT5G56090.1 Orysa4|Os08g38720.1  
 AT2G43640.1 Orysa4|Os04g53220.1  
 AT2G14095.1 Orysa4|Os10g23060.1  
 Orysa4|Os04g37760.1  
 AT2G01490.1 Orysa4|Os03g50040.1  
 Orysa4|Os05g39650.1  
 AT5G19630.1 Orysa4|Os02g48590.1  
 AT5G63530.1 Orysa4|Os04g32030.1,Orysa4|Os02g30650.1  
 AT2G36950.1 Orysa4|Os10g30450.1  
 AT5G50740.1  
 AT1G29000.1,AT5G50730.1  
 AT3G21490.1  
 AT5G03380.1



AT5G60800.1  
Orysa4|Os10g14870.1  
Orysa4|Os07g20340.1  
AT3G49990.1 Orysa4|Os03g25620.1  
Orysa4|Os07g44050.1  
AT3G18165.1 Orysa4|Os01g16010.1  
AT5G52810.1 Orysa4|Os10g38930.1  
AT1G48160.1 Orysa4|Os06g23430.1  
AT1G28140.1 Orysa4|Os03g63360.1  
AT1G50170.1 Orysa4|Os02g19440.1  
AT4G24310.1,AT3G02430.1 Orysa4|Os08g01530.1  
AT3G21550.1,AT3G21520.1 Orysa4|Os03g25440.1  
AT5G46090.1,AT4G18425.1 Orysa4|Os06g24490.1,Orysa4|Os05g48840.1  
AT5G39650.1,AT1G09157.1  
AT4G28485.1  
Orysa4|Os01g27100.1,Orysa4|Os07g22510.1,Orysa4|Os01g29240.1,Orysa4|Os01g29280.1,Orysa4|Os01  
g29330.1  
Orysa4|Os12g22270.1,Orysa4|Os02g27800.1  
Orysa4|Os01g27070.1,Orysa4|Os01g26904.1  
AT3G05600.1,AT4G02340.1 Orysa4|Os05g19150.1  
AT3G51000.1 Orysa4|Os12g43970.1  
AT2G26750.1,AT2G26740.1  
AT4G15960.1  
AT4G15955.1  
Orysa4|Os01g15120.1  
Orysa4|Os03g61340.1  
AT3G43600.1,AT5G20960.1,AT2G27150.1,AT1G04580.1  
Orysa4|Os07g18120.1,Orysa4|Os07g18154.1,Orysa4|Os03g57680.1  
AT1G02590.1  
Orysa4|Os07g07050.1  
Orysa4|Os03g58380.1  
Orysa4|Os03g57720.1  
AT5G59400.2 Orysa4|Os05g02010.1  
AT1G05460.1 Orysa4|Os03g06440.1  
AT2G04540.1 Orysa4|Os02g10320.1  
AT1G74960.1 Orysa4|Os07g42420.1  
AT1G54150.1 Orysa4|Os03g08000.1  
AT4G31200.1 Orysa4|Os06g46880.1  
AT5G64620.1 Orysa4|Os08g01670.1,Orysa4|Os12g18560.1  
Orysa4|Os01g20970.1  
AT1G16830.1,AT1G78895.1 Orysa4|Os08g12850.1  
AT2G15820.1 Orysa4|Os02g47360.1  
AT4G25290.1 Orysa4|Os09g36240.1  
AT3G01516.1,AT5G14690.1 Orysa4|Os01g45160.1,Orysa4|Os05g49340.1,Orysa4|Os01g47280.1  
AT4G14230.1,AT4G14240.1 Orysa4|Os05g32850.1  
AT4G33700.1,AT2G14520.1 Orysa4|Os03g47120.1  
AT1G03270.1  
AT5G52590.1 Orysa4|Os02g48000.1  
AT5G07140.1,AT5G58520.1 Orysa4|Os03g18430.1  
AT5G56730.1 Orysa4|Os01g37825.1  
AT3G54670.1 Orysa4|Os12g44390.1  
AT3G06260.1 Orysa4|Os03g24510.1,Orysa4|Os07g45260.1  
AT4G02130.1,AT3G28340.1,AT1G02720.1,AT1G70090.1,AT3G62660.1,AT1G24170.1  
Orysa4|Os06g13760.1,Orysa4|Os02g50600.1  
AT1G19300.1,AT3G50760.1 Orysa4|Os03g47530.1,Orysa4|Os10g31650.1  
AT1G13250.1  
Orysa4|Os03g18890.1  
AT4G39680.1 Orysa4|Os03g26630.1  
Orysa4|Os07g43316.1  
AT3G24080.1 Orysa4|Os05g41100.1  
AT1G03290.1,AT4G02880.1 Orysa4|Os10g16440.1  
Orysa4|Os05g32810.1  
AT2G03150.1 Orysa4|Os06g36710.1  
AT3G06060.1,AT5G19200.1 Orysa4|Os02g47350.1  
AT4G01590.1,AT4G35680.1 Orysa4|Os07g42080.1  
AT5G18480.1 Orysa4|Os02g41520.1  
AT2G35300.1,AT1G32560.1 Orysa4|Os04g49980.1  
AT2G01260.1,AT1G15030.1  
Orysa4|Os01g33000.1,Orysa4|Os03g61580.1,Orysa4|Os07g14310.1,Orysa4|Os01g20120.1  
AT4G28150.1,AT1G03610.1,AT4G03420.1 Orysa4|Os10g35150.1  
AT5G23380.1  
AT4G16100.1  
AT5G49220.1  
AT5G08360.1  
AT1G17830.1,AT1G73210.1  
Orysa4|Os01g04590.1  
Orysa4|Os04g44580.1  
Orysa4|Os02g58100.1  
AT4G03180.1 Orysa4|Os12g35270.1  
AT1G27750.1 Orysa4|Os03g10750.1  
AT5G62550.1 Orysa4|Os06g38960.1  
AT5G38840.1 Orysa4|Os06g16430.1

AT3G18860.1 Orysa4|Os07g03160.1  
 AT4G34460.1 Orysa4|Os03g46650.1  
 AT3G18140.1 Orysa4|Os03g47780.1  
 AT2G22040.1  
 AT1G19490.1 Orysa4|Os11g05640.1  
 AT1G30550.1,AT1G45231.2 Orysa4|Os03g27930.1,Orysa4|Os06g08800.1  
 AT2G05830.1 Orysa4|Os11g11050.1  
 AT4G17380.1 Orysa4|Os07g30240.1  
 AT1G20780.1,AT1G76390.1 Orysa4|Os12g17900.1  
 AT1G68940.1 Orysa4|Os02g49520.1,Orysa4|Os06g16410.1  
 Orysa4|Os01g72000.1  
 Orysa4|Os12g17880.1  
 Orysa4|Os03g45420.1  
 AT2G28910.1 Orysa4|Os09g01640.1  
 Orysa4|Os05g23240.1  
 AT4G23930.1 Orysa4|Os01g13340.1,Orysa4|Os05g14880.1  
 AT1G64450.1  
 AT5G47635.1,AT2G40113.1,AT4G17215.1 Orysa4|Os10g14194.1,Orysa4|Os10g13914.1  
 AT3G14740.2 Orysa4|Os01g08820.1  
 Orysa4|Os08g19374.1  
 AT2G15860.1 Orysa4|Os03g52780.1  
 AT1G53090.1,AT3G15354.1 Orysa4|Os01g52640.1  
 AT2G32950.1 Orysa4|Os02g53140.1  
 AT5G52250.1,AT5G23730.1 Orysa4|Os02g02380.1  
 AT2G46340.1 Orysa4|Os05g49590.1  
 AT4G11110.1  
 AT4G11640.1 Orysa4|Os04g46930.1  
 AT3G54460.1 Orysa4|Os01g72310.1  
 AT3G48880.1 Orysa4|Os10g35920.1  
 AT4G11580.1  
 AT4G01940.1 Orysa4|Os03g20010.1  
 AT4G37890.1,AT2G22680.1,AT5G49665.1 Orysa4|Os04g01160.1  
 AT5G60710.1 Orysa4|Os02g40664.1,Orysa4|Os02g56280.1  
 AT5G65683.1  
 AT2G38970.1,AT3G54780.1  
 AT1G08050.1  
 Orysa4|Os09g12720.1  
 Orysa4|Os12g10250.1,Orysa4|Os10g32750.1  
 Orysa4|Os03g04890.1,Orysa4|Os04g42980.1,Orysa4|Os10g32740.1  
 Orysa4|Os11g43030.1  
 Orysa4|Os12g24390.1  
 Orysa4|Os08g03270.1  
 AT1G09800.1 Orysa4|Os12g09290.1  
 AT4G16970.1 Orysa4|Os10g41390.1  
 AT1G44780.1,AT4G08310.1 Orysa4|Os11g34190.1  
 AT3G62080.1 Orysa4|Os01g18280.1  
 AT5G63910.1 Orysa4|Os04g59630.1  
 AT1G23390.1 Orysa4|Os01g50840.1,Orysa4|Os02g26670.1,Orysa4|Os09g12150.1  
 AT5G55370.1,AT5G55350.1,AT3G51970.1,AT5G55320.1,AT1G34500.1,AT5G51420.1,AT5G55330.1,AT1G34490.1,AT1G34520.1,AT5G55340.1,AT5G55380.1,AT5G55360.1  
 Orysa4|Os04g20880.1,Orysa4|Os04g40590.1,Orysa4|Os02g25700.1,Orysa4|Os02g26840.1,Orysa4|Os04g40580.1  
 Orysa4|Os01g46270.1  
 AT1G29990.1 Orysa4|Os02g14860.1  
 AT4G33360.1 Orysa4|Os03g08630.1  
 AT1G56090.1 Orysa4|Os04g52580.1  
 AT4G05210.1,AT4G21220.1 Orysa4|Os07g04200.1  
 AT4G24710.1 Orysa4|Os04g40290.1  
 AT1G18190.1 Orysa4|Os04g55810.1  
 AT4G10170.1,AT1G33480.1 Orysa4|Os08g01880.1  
 AT4G12250.1,AT2G45310.1,AT1G02000.1,AT4G30440.1,AT4G00110.1 Orysa4|Os03g14540.1  
 AT3G23820.1 Orysa4|Os09g32670.1,Orysa4|Os08g41440.1  
 Orysa4|Os06g08810.1,Orysa4|Os02g54890.1  
 AT2G44580.1 Orysa4|Os05g02810.1  
 AT5G54830.1 Orysa4|Os09g38520.1,Orysa4|Os06g44040.1  
 AT5G55640.1 Orysa4|Os03g39820.1  
 Orysa4|Os03g29910.1  
 AT2G26270.1 Orysa4|Os09g26870.1  
 AT3G43930.1  
 AT3G30390.1,AT5G38820.1 Orysa4|Os06g16420.1,Orysa4|Os02g49510.1  
 AT2G40420.1,AT3G56200.1 Orysa4|Os01g61044.1  
 AT1G80510.1 Orysa4|Os06g43700.1  
 Orysa4|Os06g42720.1,Orysa4|Os02g09810.1  
 Orysa4|Os09g26290.1  
 AT5G48240.1 Orysa4|Os11g16480.1  
 AT4G12340.1 Orysa4|Os05g01300.1  
 AT3G57790.1 Orysa4|Os09g31270.1  
 AT5G23080.1 Orysa4|Os06g29400.1  
 AT1G54170.1,AT3G14010.1 Orysa4|Os02g27950.1  
 AT3G24870.1,AT3G24880.1 Orysa4|Os05g51550.1,Orysa4|Os08g08000.1  
 AT4G35990.1 Orysa4|Os03g14020.1  
 AT4G35987.1

AT4G31400.1 Orysa4|Os05g31230.1,Orysa4|Os04g42120.1  
AT4G24130.1 Orysa4|Os10g37400.1  
AT5G46230.1 Orysa4|Os07g02900.1,Orysa4|Os07g02690.1,Orysa4|Os07g02850.1,Orysa4|Os06g34790.1,Orysa4|Os01g11240.1,Orysa4|Os07g02880.1  
AT1G30020.1 Orysa4|Os05g49790.1,Orysa4|Os01g46390.1  
Orysa4|Os11g38210.1  
AT5G66470.1 Orysa4|Os05g49220.1  
AT1G71500.1 Orysa4|Os11g13850.1  
AT4G00030.1 Orysa4|Os04g46610.1  
AT5G43630.1 Orysa4|Os01g56780.1  
AT3G18100.1 Orysa4|Os07g04700.1  
Orysa4|Os07g04430.1  
Orysa4|Os07g04420.1  
AT5G47180.1 Orysa4|Os10g40140.1  
AT3G60600.1,AT4G00170.1 Orysa4|Os08g05890.1  
AT1G08820.1 Orysa4|Os01g71050.1,Orysa4|Os05g30950.1  
AT2G45140.1 Orysa4|Os04g45190.1  
AT1G51270.1 Orysa4|Os10g40170.1  
Orysa4|Os04g46780.1,Orysa4|Os02g44300.1  
Orysa4|Os10g36350.1  
Orysa4|Os02g42940.1,Orysa4|Os08g06020.1  
AT5G61330.1 Orysa4|Os01g34200.1  
AT4G24270.2 Orysa4|Os08g02130.1  
AT3G24530.1 Orysa4|Os02g16660.1  
AT5G09910.1,AT5G64813.1 Orysa4|Os10g04580.1,Orysa4|Os03g13860.1  
AT5G65950.1 Orysa4|Os02g48380.1  
AT3G49600.1 Orysa4|Os03g09260.1  
Orysa4|Os03g09270.1  
AT5G35100.1 Orysa4|Os08g19610.1  
AT1G17410.1 Orysa4|Os02g35700.1  
AT4G09320.1 Orysa4|Os10g41410.1  
AT5G63310.1 Orysa4|Os12g36194.1  
AT4G23900.1,AT4G11010.1 Orysa4|Os05g51700.1  
Orysa4|Os07g30970.1  
AT1G74070.1 Orysa4|Os01g02080.1  
AT5G48340.1 Orysa4|Os01g67170.1  
AT5G38360.1 Orysa4|Os04g31240.1  
AT2G24990.1,AT5G37350.1 Orysa4|Os07g06820.1  
AT3G51270.1 Orysa4|Os01g66520.1  
AT5G63110.1 Orysa4|Os08g25570.1  
AT4G38130.1 Orysa4|Os02g12380.1,Orysa4|Os06g38470.1,Orysa4|Os02g12350.1  
AT5G35600.1  
AT3G44680.1 Orysa4|Os01g40400.1,Orysa4|Os11g09370.1,Orysa4|Os11g09440.1  
Orysa4|Os01g12310.1  
AT3G56880.1,AT2G41010.1 Orysa4|Os01g17050.1  
Orysa4|Os03g20440.1  
AT4G13840.1,AT3G23840.1 Orysa4|Os04g52164.1  
AT4G24510.1  
AT3G55080.1 Orysa4|Os01g74500.1  
AT5G17240.1 Orysa4|Os07g28840.1  
AT1G07700.3 Orysa4|Os02g35900.1  
AT2G37070.1,AT3G53320.1 Orysa4|Os05g03060.1  
AT2G38890.1  
AT3G56230.1 Orysa4|Os12g02030.1  
AT1G64150.1 Orysa4|Os01g12220.1  
AT5G36290.1 Orysa4|Os11g28300.1,Orysa4|Os08g41670.1  
AT4G13590.1 Orysa4|Os11g34180.1  
AT1G68650.1,AT1G25520.1 Orysa4|Os08g33630.1  
AT2G30600.1 Orysa4|Os05g27880.1  
AT3G56330.1 Orysa4|Os05g25880.1  
Orysa4|Os05g25870.1  
AT3G15620.1 Orysa4|Os02g10990.1  
AT1G49540.1 Orysa4|Os08g38570.1  
AT1G08500.1 Orysa4|Os01g17470.1  
Orysa4|Os12g26880.1,Orysa4|Os11g29910.1  
AT3G25110.1,AT4G13050.1 Orysa4|Os09g32760.1  
AT1G08510.1 Orysa4|Os06g39520.1,Orysa4|Os02g43090.1,Orysa4|Os11g43820.1,Orysa4|Os06g05130.1  
Orysa4|Os01g31760.1  
AT1G75560.1 Orysa4|Os10g39820.1  
Orysa4|Os03g60600.1  
AT5G02770.1 Orysa4|Os03g17490.1  
AT5G37590.1 Orysa4|Os04g20960.1  
AT3G45830.1 Orysa4|Os05g02680.1  
AT3G28030.1 Orysa4|Os03g10780.1  
AT4G24880.1 Orysa4|Os01g01130.1  
AT2G42770.1 Orysa4|Os01g53060.1  
AT5G41480.1 Orysa4|Os12g42870.1  
AT4G11450.1,AT1G63520.1 Orysa4|Os10g40324.1,Orysa4|Os03g01550.1

AT4G31160.1 Orysa4|Os04g59460.1  
AT2G02710.1 Orysa4|Os01g09120.1  
AT4G33780.1 Orysa4|Os03g12930.1  
AT1G69935.1  
AT2G20330.1 Orysa4|Os10g32710.1  
AT4G01860.1 Orysa4|Os03g02110.1  
AT5G03280.1 Orysa4|Os07g06130.1,Orysa4|Os03g49400.1,Orysa4|Os07g06190.1  
AT5G49210.1 Orysa4|Os11g05120.1  
AT5G44450.1 Orysa4|Os03g56830.1  
AT3G06510.1 Orysa4|Os11g45710.1  
ATMG00520.1 Orysa4|Os12g33990.1  
AT1G22790.1 Orysa4|Os01g40700.1  
AT1G34010.1  
Orysa4|Os05g51370.1  
AT3G27340.1 Orysa4|Os02g10430.1,Orysa4|Os01g67730.1  
AT5G01010.1 Orysa4|Os05g24020.1  
AT5G14240.1 Orysa4|Os01g08960.1  
AT4G27540.1 Orysa4|Os09g04880.1  
AT5G02250.1 Orysa4|Os01g62440.1  
AT1G69830.1 Orysa4|Os01g51754.1  
AT4G25000.1  
Orysa4|Os06g49970.1,Orysa4|Os02g52700.1,Orysa4|Os08g36900.1,Orysa4|Os08g36910.1,Orysa4|Os09  
g28430.1,Orysa4|Os02g52710.1,Orysa4|Os09g28420.1,Orysa4|Os09g28400.1  
AT1G76130.1 Orysa4|Os04g33040.1  
Orysa4|Os01g25510.1  
AT1G79760.1 Orysa4|Os01g54090.1  
AT2G38500.1 Orysa4|Os01g60800.1  
AT1G15860.1 Orysa4|Os08g34070.1  
AT3G12760.1 Orysa4|Os06g12690.1  
AT5G23590.1 Orysa4|Os03g04400.1  
AT4G16510.1 Orysa4|Os02g44330.1  
AT2G05910.1,AT5G20640.1 Orysa4|Os03g08200.1,Orysa4|Os04g36830.1  
AT1G03110.1 Orysa4|Os03g53530.1  
AT2G14045.1 Orysa4|Os07g08820.1  
AT3G24020.1,AT4G13580.1 Orysa4|Os03g05030.1  
AT2G28210.1,AT1G08065.1,AT1G08080.1  
Orysa4|Os08g32750.1,Orysa4|Os08g32840.1,Orysa4|Os08g36630.1,Orysa4|Os08g36680.1,Orysa4|Os08  
g32780.1  
AT3G52720.1 Orysa4|Os04g33660.1,Orysa4|Os02g33030.1  
AT5G04180.1,AT4G20990.1  
AT5G56330.1  
AT4G21000.1  
Orysa4|Os09g28150.1  
Orysa4|Os12g05730.1  
Orysa4|Os11g05510.1  
Orysa4|Os09g28130.1  
AT5G04430.2 Orysa4|Os02g57640.1  
AT5G59960.1 Orysa4|Os01g05830.1  
AT1G17680.1 Orysa4|Os11g16540.1  
AT3G62940.2 Orysa4|Os04g52850.1  
AT3G05520.1 Orysa4|Os07g23200.1  
AT5G17370.1 Orysa4|Os07g01730.1  
AT1G56210.1 Orysa4|Os03g22490.1,Orysa4|Os05g30570.1,Orysa4|Os07g47480.1,Orysa4|Os01g70710.1  
AT3G06130.1,AT5G19090.1 Orysa4|Os11g05010.1,Orysa4|Os12g05040.1  
AT5G27690.1 Orysa4|Os05g05820.1  
AT3G05220.1  
AT3G04900.1,AT4G23882.1  
AT1G30473.1  
Orysa4|Os01g61070.1  
Orysa4|Os01g03490.1  
Orysa4|Os09g14240.1  
AT4G30990.1 Orysa4|Os01g40250.1  
AT1G79890.1 Orysa4|Os05g13300.1  
AT1G09995.1  
AT1G49590.1 Orysa4|Os06g11170.1  
AT5G09860.1 Orysa4|Os03g01970.1  
AT2G17705.1 Orysa4|Os03g04370.1  
AT2G25910.2 Orysa4|Os01g38620.1  
AT5G35910.1 Orysa4|Os10g30100.1  
AT1G54440.1  
AT1G48650.1,AT2G01130.1 Orysa4|Os03g53760.1  
AT2G30800.1 Orysa4|Os01g56190.1  
AT1G58060.1,AT1G58050.1 Orysa4|Os04g35260.1  
AT5G04895.1  
AT2G35920.1  
AT1G06670.1  
AT1G05410.1 Orysa4|Os03g53590.1  
AT2G46225.1 Orysa4|Os05g50800.1,Orysa4|Os01g43420.1  
AT3G58460.1 Orysa4|Os03g44830.1  
AT3G12640.1 Orysa4|Os04g39629.1  
Orysa4|Os04g24170.1  
AT5G52800.1 Orysa4|Os07g28470.1

AT2G29680.1,AT1G07270.1 Orysa4|Os01g63710.1  
AT5G06550.1 Orysa4|Os11g36450.1  
AT1G33990.1,AT4G09900.1 Orysa4|Os08g01850.1  
AT3G10870.1 Orysa4|Os11g02580.1,Orysa4|Os12g02500.1  
AT3G29770.1 Orysa4|Os07g41230.1  
AT4G16690.1,AT5G58310.1  
AT1G26360.1,AT1G69240.1  
AT1G11240.1 Orysa4|Os03g23020.1  
AT2G19690.1,AT4G29460.1,AT4G29470.1 Orysa4|Os02g58500.1  
AT2G47210.1 Orysa4|Os05g46330.1  
AT5G47920.1 Orysa4|Os02g30240.1,Orysa4|Os04g31350.1  
AT5G13880.1  
AT2G42180.1,AT3G57950.1,AT5G06790.1 Orysa4|Os09g10730.1  
AT5G58760.1 Orysa4|Os01g04870.1  
AT5G47090.1 Orysa4|Os06g04780.1  
AT5G17910.1 Orysa4|Os01g59670.1  
Orysa4|Os05g41150.1  
Orysa4|Os03g64390.1,Orysa4|Os07g28920.1  
AT4G27120.1 Orysa4|Os07g01320.1  
AT3G15200.1 Orysa4|Os01g05860.1  
AT5G13770.1 Orysa4|Os04g49350.1  
AT1G64100.1,AT1G06710.1,AT2G17525.1,AT5G41170.1,AT1G64580.1,AT2G41720.1,AT2G37230.1,AT5G40400.1,A  
T3G18110.1,AT3G22470.1,AT1G62860.1,AT1G13040.1,AT5G61990.1,AT1G02060.1,AT4G20090.1,AT1G12300.1,AT  
3G06920.1,AT1G05670.1,AT1G62670.1,AT3G07290.1,AT1G79080.1,AT1G71210.1,AT1G19290.1,AT5G16640.1,AT1  
G12620.1,AT3G23020.1,AT2G17140.1,AT5G61400.1,AT2G32630.1,AT5G65560.1,AT5G59900.1,AT1G74580.1,AT3G  
16010.1,AT1G12775.1,AT4G31850.1  
Orysa4|Os02g57800.1,Orysa4|Os08g31110.1,Orysa4|Os06g47570.1,Orysa4|Os04g41140.1,Orysa4|Os03  
g06910.1,Orysa4|Os02g03530.1,Orysa4|Os01g57410.1,Orysa4|Os10g35240.1,Orysa4|Os07g14530.1,Orysa4|Os07g  
30930.1,Orysa4|Os05g04160.1,Orysa4|Os06g36910.1,Orysa4|Os07g47720.1,Orysa4|Os03g40690.1,Orysa4|Os05g1  
9380.1,Orysa4|Os07g01130.1,Orysa4|Os07g42880.1,Orysa4|Os04g58780.1,Orysa4|Os05g24930.1,Orysa4|Os02g38  
950.1,Orysa4|Os08g20610.1,Orysa4|Os10g28600.1,Orysa4|Os02g16650.1,Orysa4|Os04g28234.1,Orysa4|Os09g255  
50.1,Orysa4|Os08g01640.1,Orysa4|Os01g63400.1,Orysa4|Os12g37100.1,Orysa4|Os07g40120.1,Orysa4|Os02g2158  
0.1,Orysa4|Os08g01870.1,Orysa4|Os09g02260.1,Orysa4|Os10g35640.1  
AT2G26790.1 Orysa4|Os11g43800.1  
AT3G53700.1 Orysa4|Os03g40020.1  
AT3G14580.1,AT1G63330.1,AT1G63130.1,AT1G63400.1,AT2G38420.1,AT5G14820.1,AT1G09900.1,AT2G40240.1,A  
T5G25630.1,AT1G66345.1,AT1G62680.1,AT5G11310.1,AT5G14080.1,AT5G01110.1,AT5G15010.1,AT1G74900.1,AT1  
G71060.1,AT1G63630.1,AT1G80550.1,AT1G07740.1,AT4G34830.1,AT5G18475.1,AT4G19440.1,AT5G24830.1,AT1G  
19525.1,AT5G46580.1,AT4G28010.1,AT1G22960.1,AT1G53330.1,AT5G18390.1,AT3G61360.1,AT5G61370.1,AT1G0  
3560.1,AT3G25210.1,AT3G22670.1,AT4G38150.1,AT1G52620.1,AT1G06580.1,AT1G11710.1,AT2G06000.1,AT5G189  
50.1,AT1G05600.1,AT5G15280.1,AT1G63230.1,AT3G17370.1,AT3G61520.1,AT5G21222.1,AT3G54980.1,AT1G6272  
0.1,AT5G38730.1,AT2G01390.1,AT1G55890.1,AT1G63080.1,AT1G80150.1,AT1G18900.1,AT1G13630.1,AT1G51965.1,AT5G62370.1,AT1  
G73710.1,AT5G39710.1,AT3G59040.2,AT5G42310.1,AT1G02420.1,AT1G74850.1,AT1G13800.1,AT3G16890.1,AT5  
G46100.1,AT3G09650.1,AT1G52640.1,AT2G18940.1,AT1G26500.1,AT2G15630.1,AT3G18020.1,AT1G63150.1,AT1G  
62590.1,AT1G73400.1,AT1G30290.1,AT5G28460.1,AT1G08610.1,AT5G16420.1,AT5G39980.1,AT5G46680.1,AT1G6  
2910.1,AT5G50280.1,AT4G26800.1,AT1G74750.1,AT1G63070.1,AT3G13150.1,AT1G77340.1,AT3G04760.1,AT5G14  
770.1,AT4G14190.1,AT4G30825.1,AT5G65820.1,AT2G16880.1,AT3G56030.1,AT3G09060.1,AT5G55840.1,AT3G624  
70.1,AT1G11630.1,AT2G01740.1,AT3G04130.1,AT3G62540.1,AT1G09680.1,AT2G17670.1,AT2G15980.1,AT1G55630  
.1,AT3G29290.1,AT5G28370.1,AT2G36240.1  
Orysa4|Os01g54380.1,Orysa4|Os10g35436.1,Orysa4|Os10g35790.1,Orysa4|Os05g22870.1,Orysa4|Os04  
g38930.1,Orysa4|Os03g11670.1,Orysa4|Os01g36600.1,Orysa4|Os03g11020.1,Orysa4|Os01g48140.1,Orysa4|Os02g  
43080.1,Orysa4|Os06g05920.1,Orysa4|Os10g36190.1,Orysa4|Os01g42620.1,Orysa4|Os12g21930.1,Orysa4|Os08g0  
1650.1,Orysa4|Os08g41380.1,Orysa4|Os07g36390.1,Orysa4|Os04g55090.1,Orysa4|Os12g05640.1,Orysa4|Os03g52  
620.1,Orysa4|Os12g27060.1,Orysa4|Os03g07220.1,Orysa4|Os02g02950.1,Orysa4|Os09g25050.1,Orysa4|Os10g214  
70.1,Orysa4|Os03g11690.1,Orysa4|Os04g28200.1,Orysa4|Os08g21570.1,Orysa4|Os02g26890.1,Orysa4|Os02g1334  
0.1,Orysa4|Os05g19390.1,Orysa4|Os12g01210.1,Orysa4|Os02g27070.1,Orysa4|Os12g44170.1,Orysa4|Os01g06000.  
1,Orysa4|Os08g28180.1,Orysa4|Os11g39360.1,Orysa4|Os02g02020.1,Orysa4|Os02g20160.1,Orysa4|Os04g57900.1,  
Orysa4|Os12g18640.1,Orysa4|Os02g03930.1,Orysa4|Os05g50690.1,Orysa4|Os11g03850.1,Orysa4|Os02g45590.1,O  
rysa4|Os02g02740.1,Orysa4|Os03g53490.1,Orysa4|Os10g33874.1,Orysa4|Os05g30240.1,Orysa4|Os02g58300.1,Ory  
sa4|Os08g17080.1,Orysa4|Os06g30420.1,Orysa4|Os07g32900.1,Orysa4|Os07g20510.1,Orysa4|Os06g09880.1,Ory  
sa4|Os12g42120.1,Orysa4|Os01g68070.1,Orysa4|Os05g11700.1,Orysa4|Os02g55020.1,Orysa4|Os03g56960.1,Ory  
sa4|Os02g39820.1,Orysa4|Os07g47470.1,Orysa4|Os01g60010.1,Orysa4|Os01g15840.1,Orysa4|Os09g37070.1,Orysa4|  
Os03g51840.1,Orysa4|Os01g32090.1,Orysa4|Os06g49670.1,Orysa4|Os08g19310.1,Orysa4|Os10g33700.1,Orysa4|O  
s04g39000.1,Orysa4|Os07g28900.1,Orysa4|Os07g41260.1,Orysa4|Os06g03530.1,Orysa4|Os03g21780.1,Orysa4|Os  
06g13950.1,Orysa4|Os10g42760.1,Orysa4|Os11g01210.1,Orysa4|Os05g32730.1,Orysa4|Os06g07550.1,Orysa4|Os0  
3g24880.1,Orysa4|Os04g40010.1,Orysa4|Os08g15000.1,Orysa4|Os11g24570.1,Orysa4|Os05g28720.1,Orysa4|Os08  
g39050.1,Orysa4|Os10g22370.1,Orysa4|Os07g48850.1,Orysa4|Os05g40320.1,Orysa4|Os02g07360.1,Orysa4|Os04g  
40130.1  
AT1G61870.1 Orysa4|Os01g58080.1  
AT2G30780.1,AT2G48000.1 Orysa4|Os05g33760.1  
AT1G01970.1 Orysa4|Os07g46730.1  
AT3G06430.1 Orysa4|Os03g19650.1  
AT1G76280.1 Orysa4|Os09g29790.1  
AT1G31840.1  
AT4G21170.1,AT5G04810.1  
AT3G48810.1  
AT5G48730.1,AT2G27800.1,AT3G60050.1,AT3G49240.1  
AT3G42560.1  
AT1G19520.1

AT2G28050.1  
AT1G80880.1  
AT1G77405.1  
AT2G39230.1,AT4G16390.1,AT1G11900.1,AT1G63320.1  
AT1G10270.1  
AT1G20300.1  
AT5G60960.1  
AT2G01360.1  
Orysa4|Os03g06710.1  
Orysa4|Os10g35090.1  
Orysa4|Os07g11280.1  
Orysa4|Os06g12930.1  
Orysa4|Os04g21470.1  
Orysa4|Os01g07340.1,Orysa4|Os03g12430.1,Orysa4|Os10g35230.1,Orysa4|Os10g10170.1,Orysa4|Os03  
g60910.1,Orysa4|Os03g50500.1,Orysa4|Os01g61630.1,Orysa4|Os07g08180.1,Orysa4|Os09g36230.1  
Orysa4|Os04g44030.1,Orysa4|Os02g48122.1,Orysa4|Os06g31300.1  
Orysa4|Os06g08570.1  
Orysa4|Os03g02430.1  
Orysa4|Os02g21070.1  
Orysa4|Os01g68550.1  
Orysa4|Os12g37550.1  
Orysa4|Os06g44820.1  
Orysa4|Os10g02650.1  
Orysa4|Os07g40820.1  
Orysa4|Os02g42210.1  
Orysa4|Os03g58120.1  
Orysa4|Os05g24270.1  
Orysa4|Os02g52220.1  
Orysa4|Os10g34370.1  
Orysa4|Os03g06370.1  
AT3G50140.1,AT3G50170.1,AT3G50180.1,AT3G50150.1,AT3G50120.1,AT3G50130.1 Orysa4|Os04g42650.1  
AT2G36430.1,AT5G22540.1,AT5G22560.1,AT3G50160.1,AT3G47250.1,AT5G22550.2  
AT3G50190.1  
AT3G50200.1  
AT1G65985.1,AT2G44930.1  
Orysa4|Os05g15230.1,Orysa4|Os08g42570.1,Orysa4|Os03g19700.1,Orysa4|Os01g21670.1,Orysa4|Os01  
g21650.1  
Orysa4|Os11g33430.1,Orysa4|Os12g29650.1,Orysa4|Os11g33970.1,Orysa4|Os11g33450.1,Orysa4|Os08  
g25030.1,Orysa4|Os11g33394.1,Orysa4|Os11g33942.1,Orysa4|Os11g34090.1  
Orysa4|Os10g31170.1,Orysa4|Os08g26850.1,Orysa4|Os09g13470.1,Orysa4|Os09g12970.1,Orysa4|Os04  
g55390.1,Orysa4|Os08g26840.1,Orysa4|Os09g12840.1,Orysa4|Os08g26820.1,Orysa4|Os10g31240.1  
Orysa4|Os01g38430.1  
Orysa4|Os12g32880.1,Orysa4|Os12g32920.1  
Orysa4|Os09g09550.1,Orysa4|Os06g33350.1  
Orysa4|Os05g10900.1,Orysa4|Os01g19610.1,Orysa4|Os08g26710.1,Orysa4|Os05g10920.1,Orysa4|Os09  
g13040.1  
Orysa4|Os08g26220.1,Orysa4|Os08g30520.1  
Orysa4|Os11g33950.1  
Orysa4|Os06g35860.1  
AT4G19410.1,AT5G45280.2 Orysa4|Os04g51340.1  
AT3G09410.1 Orysa4|Os01g74330.1,Orysa4|Os05g02120.1  
AT3G62060.1,AT1G57590.1,AT3G05910.1,AT5G26670.1 Orysa4|Os07g44070.1  
AT4G19420.1 Orysa4|Os02g47400.1  
AT5G23870.3,AT2G46930.1  
AT1G09550.1  
Orysa4|Os01g66840.1  
Orysa4|Os01g66850.1,Orysa4|Os01g66830.1  
AT2G34640.1 Orysa4|Os01g56350.1  
AT1G60640.1 Orysa4|Os01g32130.1  
AT1G77470.1 Orysa4|Os02g53500.1  
AT1G63160.1 Orysa4|Os04g48060.1  
AT5G58990.1,AT5G52370.1 Orysa4|Os02g27960.1  
AT3G19150.1,AT1G49620.1,AT2G23430.1 Orysa4|Os11g40030.1  
AT5G54200.1,AT3G15470.1 Orysa4|Os04g58180.1  
AT5G53500.1,AT5G24320.2 Orysa4|Os03g02440.1,Orysa4|Os04g48010.1  
AT2G37670.1,AT5G02430.1 Orysa4|Os11g08400.1  
AT5G42010.1,AT1G64610.1  
Orysa4|Os04g44700.1  
Orysa4|Os02g42590.1  
Orysa4|Os02g33630.1,Orysa4|Os04g34080.1  
AT1G01770.1 Orysa4|Os07g27350.1  
AT1G05385.1 Orysa4|Os03g53640.1  
AT5G53770.1 Orysa4|Os01g48210.1  
AT5G11240.1 Orysa4|Os03g18840.1  
AT2G04560.1 Orysa4|Os01g54900.1  
AT2G13840.1 Orysa4|Os03g09180.1  
AT1G06550.1 Orysa4|Os01g54860.1  
AT4G31810.1 Orysa4|Os10g40540.1  
AT2G30650.1,AT2G30660.1,AT5G65940.1 Orysa4|Os12g16350.1  
AT3G24360.1,AT4G13360.1 Orysa4|Os06g39344.1  
AT3G60510.1  
Orysa4|Os10g42210.1

Orysa4|Os10g42220.1  
 AT4G08230.1 Orysa4|Os03g15720.1  
 AT1G12470.1 Orysa4|Os08g08060.1  
 AT2G43780.1 Orysa4|Os12g41760.1,Orysa4|Os05g01330.1  
 AT2G04940.1 Orysa4|Os04g51080.1  
 AT5G57330.1 Orysa4|Os04g56290.1  
 AT5G66530.1 Orysa4|Os09g15820.1  
 AT3G61610.1 Orysa4|Os05g49430.1,Orysa4|Os01g46950.1  
 AT4G25900.1  
 AT4G23730.1  
 Orysa4|Os04g51390.1,Orysa4|Os08g14330.1  
 Orysa4|Os02g08030.1  
 AT2G22660.2,AT4G37900.1 Orysa4|Os11g40590.1  
 AT4G17620.1 Orysa4|Os05g32580.1  
 AT5G26610.1 Orysa4|Os04g02500.1  
 AT5G19485.1 Orysa4|Os06g23160.1  
 AT4G04670.1 Orysa4|Os07g33100.1  
 AT1G53130.1,AT4G26880.1,AT5G55110.1,AT1G50720.1 Orysa4|Os05g18940.1,Orysa4|Os01g14540.1  
 AT1G50650.1  
 AT5G51850.1,AT5G62170.1 Orysa4|Os04g01610.1  
 AT1G29950.1 Orysa4|Os01g43680.1,Orysa4|Os03g39432.1,Orysa4|Os02g21090.1  
 AT2G33740.2 Orysa4|Os10g23204.1,Orysa4|Os03g08800.1  
 AT5G58070.1 Orysa4|Os02g39930.1  
 Orysa4|Os08g34150.1  
 AT3G12530.1 Orysa4|Os01g14610.1  
 AT2G28450.1 Orysa4|Os04g01480.1  
 AT3G46550.1,AT4G31370.1,AT2G24450.1,AT5G55730.1,AT3G12660.1,AT3G60900.1,AT2G45470.1,AT4G12730.1  
 Orysa4|Os01g62380.1,Orysa4|Os05g38500.1  
 Orysa4|Os02g28130.1,Orysa4|Os06g44660.1,Orysa4|Os02g26320.1  
 Orysa4|Os04g21570.1  
 Orysa4|Os08g23180.1,Orysa4|Os09g07350.1  
 Orysa4|Os09g30010.1,Orysa4|Os08g38270.1  
 Orysa4|Os03g03600.1,Orysa4|Os04g48490.1  
 Orysa4|Os02g26290.1  
 Orysa4|Os02g49420.1  
 Orysa4|Os06g17460.1  
 AT5G22340.2 Orysa4|Os03g20640.1  
 AT1G52980.1 Orysa4|Os03g22890.1  
 AT1G06060.1 Orysa4|Os01g56820.1  
 AT3G55070.1 Orysa4|Os05g06760.1  
 AT3G22660.1 Orysa4|Os07g29320.1  
 AT1G44835.2 Orysa4|Os02g52880.1  
 AT1G64880.1 Orysa4|Os02g01230.1  
 AT5G63905.1 Orysa4|Os12g32580.1  
 AT1G65480.1,AT4G20370.1 Orysa4|Os01g11940.1,Orysa4|Os06g06300.1,Orysa4|Os06g06320.1  
 AT1G18100.1 Orysa4|Os06g30370.1  
 AT2G27550.1 Orysa4|Os02g32950.1,Orysa4|Os12g05590.1,Orysa4|Os11g05470.1  
 AT5G03840.1  
 AT5G62040.1  
 Orysa4|Os01g10590.1,Orysa4|Os02g13830.1  
 Orysa4|Os05g44180.1,Orysa4|Os11g18870.1  
 Orysa4|Os09g33850.1,Orysa4|Os12g13030.1  
 Orysa4|Os01g54490.1  
 Orysa4|Os01g02120.1  
 AT4G20260.4 Orysa4|Os02g18410.1  
 Orysa4|Os01g13210.1  
 AT1G24340.1 Orysa4|Os01g67550.1  
 AT2G35500.1 Orysa4|Os10g42700.1  
 AT1G61340.1,AT4G05010.1,AT4G21510.1 Orysa4|Os07g37400.1  
 AT5G40080.1,AT5G39800.1 Orysa4|Os02g40490.1  
 AT4G02980.1 Orysa4|Os12g34450.1,Orysa4|Os12g34460.1  
 AT1G52530.1 Orysa4|Os04g44620.1  
 AT5G20580.1,AT2G06005.1 Orysa4|Os02g53780.1  
 AT1G48760.1 Orysa4|Os01g32880.1  
 AT2G17250.1 Orysa4|Os04g49580.1  
 AT3G48210.1 Orysa4|Os05g02000.1,Orysa4|Os01g74170.1  
 Orysa4|Os01g37030.1  
 AT2G22650.1 Orysa4|Os06g08300.1  
 AT3G46300.1,AT5G02640.1 Orysa4|Os05g02900.1  
 AT4G29130.1,AT2G19860.1 Orysa4|Os05g45590.1  
 AT1G50460.1,AT3G20040.1  
 AT4G37840.1  
 Orysa4|Os01g52450.1  
 Orysa4|Os05g44760.1,Orysa4|Os01g53930.1  
 Orysa4|Os05g09500.1,Orysa4|Os01g09460.1,Orysa4|Os07g26540.1  
 AT3G20280.1 Orysa4|Os06g20410.1,Orysa4|Os02g48810.1  
 AT1G50620.1  
 Orysa4|Os02g48800.1  
 AT1G47200.1,AT5G43070.1,AT5G27940.1 Orysa4|Os03g11060.1  
 AT1G29320.1 Orysa4|Os07g32350.1  
 AT5G11450.1 Orysa4|Os01g43070.1  
 AT5G51430.1 Orysa4|Os06g45830.1

AT5G27970.1 Orysa4|Os01g56590.1  
AT2G47290.1 Orysa4|Os11g45250.1  
AT2G47300.1  
AT1G26840.1 Orysa4|Os07g43540.1  
AT3G16760.1 Orysa4|Os03g22140.1  
AT4G32360.1 Orysa4|Os02g17700.1  
AT1G64600.1 Orysa4|Os07g20150.1  
AT2G12550.1 Orysa4|Os04g55150.1  
AT4G22950.1,AT2G45660.1,AT4G11880.1 Orysa4|Os10g39130.1  
AT5G23260.2 Orysa4|Os04g52410.1,Orysa4|Os06g45650.1,Orysa4|Os02g07430.1  
AT1G69120.1,AT1G26310.1 Orysa4|Os07g01820.1,Orysa4|Os03g54160.1  
AT1G71692.1 Orysa4|Os08g02070.1,Orysa4|Os12g10520.1  
AT5G15800.1,AT1G24260.2,AT3G02310.1 Orysa4|Os08g41950.1,Orysa4|Os09g32948.1  
AT5G20240.1 Orysa4|Os01g66030.1  
AT1G65360.1,AT1G01530.1,AT3G66656.1,AT2G24840.1,AT5G60440.1,AT4G36590.1  
Orysa4|Os09g02780.1,Orysa4|Os01g74440.1,Orysa4|Os02g06860.1,Orysa4|Os05g23780.1,Orysa4|Os09  
g02830.1  
AT2G45650.1,AT3G61120.1 Orysa4|Os04g49150.1,Orysa4|Os02g45770.1  
AT3G57230.1 Orysa4|Os02g36924.1,Orysa4|Os02g49840.1  
AT4G18960.1 Orysa4|Os05g11414.1,Orysa4|Os01g10504.1  
AT1G72350.1,AT1G17310.1 Orysa4|Os12g21850.1,Orysa4|Os06g30810.1  
AT2G22540.1 Orysa4|Os03g08754.1  
AT3G54340.1 Orysa4|Os06g49840.1  
AT5G51860.1,AT5G51870.1,AT5G62165.1  
AT5G65070.1,AT5G65050.1,AT5G65060.1,AT1G77080.4  
AT5G60910.1  
AT1G31140.1,AT2G03710.1  
AT2G34440.1  
AT2G22630.1,AT4G37940.1  
AT5G13790.1,AT3G57390.1  
AT2G14210.1  
AT2G42830.2,AT3G58780.1  
AT4G09960.1  
Orysa4|Os03g03100.1  
Orysa4|Os03g03070.1  
Orysa4|Os02g20680.1  
Orysa4|Os06g06750.1,Orysa4|Os03g11614.1  
Orysa4|Os06g22760.1  
Orysa4|Os06g23980.1  
Orysa4|Os04g38780.1  
Orysa4|Os04g23910.1  
Orysa4|Os05g11380.1  
Orysa4|Os12g10540.1  
Orysa4|Os06g11330.1,Orysa4|Os02g52340.1  
AT2G19270.1 Orysa4|Os02g07920.1  
AT5G66130.1 Orysa4|Os03g13850.1  
AT2G46560.1 Orysa4|Os01g37120.1  
AT2G41350.2 Orysa4|Os08g14220.1  
AT1G72320.1 Orysa4|Os10g25110.1  
AT5G13470.1 Orysa4|Os01g71262.1  
AT1G19230.1 Orysa4|Os09g26660.1,Orysa4|Os08g35210.1  
AT3G45810.1,AT5G60010.1 Orysa4|Os01g61880.1,Orysa4|Os05g38980.1  
AT1G64060.1 Orysa4|Os05g45210.1,Orysa4|Os01g53294.1  
AT4G11230.1  
AT2G40550.1 Orysa4|Os01g07260.1  
AT1G20460.1,AT1G76185.1 Orysa4|Os03g12630.1  
AT1G76260.1,AT1G20540.1 Orysa4|Os08g44010.1  
AT5G39340.1,AT3G21510.1,AT3G29350.1,AT1G03430.1 Orysa4|Os09g39400.1,Orysa4|Os08g44350.1  
AT3G16360.1 Orysa4|Os01g54050.1,Orysa4|Os05g09410.1,Orysa4|Os05g44570.1  
AT1G80100.1  
AT4G04402.1  
AT5G19710.1  
AT5G50375.1 Orysa4|Os11g19700.1  
AT3G61620.1 Orysa4|Os09g07820.1  
AT3G54170.1 Orysa4|Os06g27970.1  
AT1G16900.1 Orysa4|Os01g11070.1  
AT4G17020.2 Orysa4|Os04g58350.1  
AT5G23240.1 Orysa4|Os04g57880.1  
Orysa4|Os06g28050.1  
AT1G78920.1,AT1G16780.1 Orysa4|Os02g33490.1  
AT1G15690.1 Orysa4|Os02g09150.1,Orysa4|Os06g08080.1  
Orysa4|Os05g06480.1,Orysa4|Os01g23580.1  
Orysa4|Os02g55890.1  
AT4G24330.1,AT5G49945.1 Orysa4|Os05g35710.1  
AT5G46420.1 Orysa4|Os05g49130.1  
AT5G08180.1 Orysa4|Os06g16290.1  
AT5G51700.1 Orysa4|Os02g33180.1  
AT3G43520.1 Orysa4|Os04g55930.1  
AT2G26240.1  
AT5G22120.1 Orysa4|Os01g73470.1  
AT4G30720.1 Orysa4|Os05g34040.1  
AT5G04360.1 Orysa4|Os04g08270.1



AT1G48270.1 Orysa4|Os06g09930.1  
 AT5G02850.1 Orysa4|Os09g36890.1  
 Orysa4|Os11g05150.1  
 AT3G48080.1,AT3G48090.1 Orysa4|Os09g22450.1  
 AT3G03100.1 Orysa4|Os10g42840.1  
 AT3G59300.1 Orysa4|Os01g67370.1  
 AT5G49530.1 Orysa4|Os08g16780.1  
 AT2G02160.1 Orysa4|Os02g58440.1,Orysa4|Os04g57600.1  
 Orysa4|Os05g08400.1  
 AT5G11620.1 Orysa4|Os06g36030.1  
 AT1G56590.1 Orysa4|Os05g31780.1  
 AT3G56040.1 Orysa4|Os05g39230.1  
 AT1G69680.1 Orysa4|Os04g38610.1  
 AT2G33500.1,AT1G28050.1 Orysa4|Os08g42440.1,Orysa4|Os09g33550.1  
 AT3G07650.1,AT5G48250.1 Orysa4|Os06g19444.1,Orysa4|Os02g49230.1  
 AT4G15250.1,AT3G21880.1  
 AT1G60250.1,AT1G68190.1  
 AT1G05290.1  
 Orysa4|Os06g01340.1  
 Orysa4|Os02g01990.1  
 AT3G17611.1 Orysa4|Os01g18100.1  
 AT5G17620.1 Orysa4|Os01g64920.1  
 AT1G32200.1 Orysa4|Os10g42720.1  
 AT1G33810.1 Orysa4|Os08g02060.1  
 AT1G50120.1 Orysa4|Os06g41440.1  
 AT1G64980.1 Orysa4|Os10g37230.1,Orysa4|Os07g23120.1  
 AT3G53580.1 Orysa4|Os12g37960.1  
 AT1G19690.1 Orysa4|Os01g15660.1  
 AT1G12940.1 Orysa4|Os01g50820.1  
 AT5G14570.1  
 AT2G39090.1 Orysa4|Os05g05720.1  
 AT5G18070.1 Orysa4|Os07g09720.1  
 AT4G27870.1 Orysa4|Os06g01440.1  
 AT4G27860.1,AT5G24290.1  
 AT3G51510.1 Orysa4|Os05g41190.1  
 AT4G31530.1 Orysa4|Os03g23980.1  
 AT1G72640.1 Orysa4|Os03g29730.1  
 AT4G18270.1 Orysa4|Os01g11260.1  
 AT5G63830.1 Orysa4|Os10g37640.1  
 AT1G24130.1,AT5G50120.1 Orysa4|Os06g13140.1,Orysa4|Os02g50740.1  
 AT2G26490.1,AT4G34380.1 Orysa4|Os03g52870.1  
 AT3G51930.1 Orysa4|Os01g71780.1  
 AT1G24530.1 Orysa4|Os04g40560.1  
 AT1G47610.1,AT3G18950.1,AT3G50390.1,AT1G49450.1  
 Orysa4|Os01g13140.1  
 Orysa4|Os03g42710.1  
 AT4G00585.1 Orysa4|Os09g38740.1  
 AT3G55830.1 Orysa4|Os06g49150.1  
 AT1G62250.1 Orysa4|Os03g53300.1  
 AT5G19840.1 Orysa4|Os01g56640.1  
 AT1G50710.1 Orysa4|Os02g02690.1  
 AT1G76730.1 Orysa4|Os12g07020.1  
 AT3G55820.1 Orysa4|Os03g13490.1  
 AT5G27390.1 Orysa4|Os07g45300.1  
 AT2G33435.1 Orysa4|Os03g04520.1  
 AT2G33440.1 Orysa4|Os01g72650.1  
 AT1G60900.1,AT4G36690.1 Orysa4|Os11g41820.1,Orysa4|Os11g45590.1  
 AT1G60830.1  
 AT5G66230.1,AT3G51230.1 Orysa4|Os10g42660.1  
 AT4G13040.1 Orysa4|Os02g29550.1  
 AT4G28590.1 Orysa4|Os01g61320.1  
 AT2G31840.1 Orysa4|Os05g34470.1  
 AT2G27450.2 Orysa4|Os02g33080.1  
 AT5G64370.1 Orysa4|Os07g30170.1  
 AT3G21200.1 Orysa4|Os08g15500.1  
 AT3G23560.1,AT3G23550.1 Orysa4|Os07g31884.1,Orysa4|Os07g01750.1  
 AT5G52450.1,AT2G34360.1,AT1G73700.1  
 Orysa4|Os04g30490.1,Orysa4|Os06g29994.1,Orysa4|Os10g20450.1,Orysa4|Os10g11354.1,Orysa4|Os06g29844.1  
 AT4G23030.1,AT1G58340.1 Orysa4|Os10g37920.1,Orysa4|Os04g48290.1,Orysa4|Os02g45380.1  
 AT4G29140.1,AT5G19700.1 Orysa4|Os06g36330.1  
 AT4G00350.1,AT4G25640.1 Orysa4|Os08g44870.1  
 AT1G23300.1,AT1G47530.1,AT5G38030.1,AT1G12950.1 Orysa4|Os08g43654.1  
 AT1G71870.1 Orysa4|Os03g62270.1  
 AT3G21690.1 Orysa4|Os03g37490.1,Orysa4|Os03g37640.1,Orysa4|Os03g37411.1  
 AT1G33080.1,AT1G33100.1,AT1G33090.1,AT1G33110.1 Orysa4|Os12g03260.1,Orysa4|Os11g03240.1  
 AT4G22790.1 Orysa4|Os03g64150.1  
 AT1G15160.1,AT1G15170.1,AT1G71140.1,AT1G15150.1,AT1G15180.1  
 Orysa4|Os01g31980.1,Orysa4|Os05g48040.1,Orysa4|Os01g49120.1  
 AT5G52050.1  
 AT2G38510.1  
 AT3G26590.1

AT5G49130.1  
AT4G21910.2,AT1G11670.1,AT4G21900.1,AT1G61890.1  
AT3G03620.1,AT5G17700.1  
AT1G64820.1,AT1G66780.1,AT2G04100.1,AT1G66760.2  
AT2G04080.1,AT2G04050.1,AT2G04040.1,AT2G04070.1,AT2G04090.1  
AT2G04066.1  
Orysa4|Os10g20390.1,Orysa4|Os10g20350.1  
Orysa4|Os10g20380.1,Orysa4|Os06g29950.1  
Orysa4|Os06g29900.1  
Orysa4|Os10g20400.1  
Orysa4|Os09g35600.1,Orysa4|Os08g43250.1  
Orysa4|Os03g12790.1  
Orysa4|Os02g57570.1  
Orysa4|Os02g57580.1  
Orysa4|Os01g56050.1  
Orysa4|Os03g37470.1  
Orysa4|Os07g33310.1  
Orysa4|Os12g03200.1,Orysa4|Os11g03484.1  
Orysa4|Os12g03240.1  
Orysa4|Os12g03230.1  
AT5G45190.1,AT4G19600.1 Orysa4|Os12g30020.1  
AT1G35440.1  
AT4G19560.1  
AT1G27630.1  
Orysa4|Os02g04010.1,Orysa4|Os02g24190.1  
Orysa4|Os11g05850.1  
AT5G22830.1 Orysa4|Os03g48000.1  
AT2G21870.1 Orysa4|Os02g03860.1  
AT1G53800.2 Orysa4|Os10g12354.1  
AT1G15880.1 Orysa4|Os08g34140.1,Orysa4|Os09g24980.1  
AT5G03080.1 Orysa4|Os03g17940.1  
AT1G21350.3 Orysa4|Os07g15670.1  
AT3G53520.2,AT2G47650.1,AT3G62830.1 Orysa4|Os03g17230.1  
AT5G59290.1,AT2G28760.1,AT3G46440.1 Orysa4|Os03g16980.1  
AT2G28755.1  
Orysa4|Os01g62020.1  
Orysa4|Os01g21320.1,Orysa4|Os05g29990.1,Orysa4|Os07g47700.1  
AT1G10220.1,AT1G59590.1 Orysa4|Os03g31740.1,Orysa4|Os07g39720.1  
AT3G52105.1 Orysa4|Os03g07870.1  
AT4G38370.1 Orysa4|Os04g14760.1  
AT5G01720.1 Orysa4|Os11g01780.1,Orysa4|Os12g01760.1  
AT3G58530.1 Orysa4|Os02g17990.1  
AT5G27920.1,AT1G80630.1 Orysa4|Os12g36670.1,Orysa4|Os10g05800.1  
AT2G36370.1 Orysa4|Os01g73750.1  
AT4G21320.1 Orysa4|Os06g46900.1  
AT1G23230.1 Orysa4|Os02g49992.1  
AT3G59380.1 Orysa4|Os09g33930.1  
AT3G11950.1 Orysa4|Os07g38850.1  
AT4G36440.1 Orysa4|Os01g15790.1  
AT5G21140.1 Orysa4|Os11g03590.1,Orysa4|Os12g03360.1  
AT1G06730.1 Orysa4|Os03g06880.1  
AT2G31530.1 Orysa4|Os05g33020.1  
AT5G26210.1,AT5G20510.1,AT3G42790.1 Orysa4|Os07g41740.1  
Orysa4|Os05g34640.1,Orysa4|Os01g66420.1  
Orysa4|Os04g36730.1,Orysa4|Os02g35600.1  
AT1G71990.1 Orysa4|Os12g07290.1  
Orysa4|Os04g35270.1  
AT4G35510.1,AT2G17540.1 Orysa4|Os06g51240.1  
AT5G66000.1  
AT1G08580.1 Orysa4|Os02g39180.1  
AT2G32650.1,AT2G32180.1 Orysa4|Os02g54360.1  
AT1G04930.1,AT2G32840.1 Orysa4|Os03g13190.1  
AT5G18130.1,AT3G03870.2 Orysa4|Os07g10420.1,Orysa4|Os03g59180.1  
AT5G64510.1 Orysa4|Os01g56180.1  
AT2G14835.1 Orysa4|Os10g20600.1  
AT3G11930.3,AT3G58450.1 Orysa4|Os03g53900.1  
AT1G09740.1 Orysa4|Os02g52314.1  
AT1G68300.1 Orysa4|Os01g32780.1  
AT3G62550.1 Orysa4|Os05g28740.1,Orysa4|Os01g19820.1,Orysa4|Os03g19270.1  
AT3G25930.1  
Orysa4|Os10g30150.1  
Orysa4|Os05g12710.1  
Orysa4|Os11g40660.1  
AT4G24175.1 Orysa4|Os04g24410.1,Orysa4|Os04g17700.1  
AT2G46090.1 Orysa4|Os03g03400.1  
AT4G29870.1,AT2G19340.1 Orysa4|Os02g21080.1  
AT1G52565.1,AT3G15760.1 Orysa4|Os06g40210.1  
AT5G53220.1 Orysa4|Os01g12180.1  
Orysa4|Os01g46840.1  
AT1G05350.1 Orysa4|Os02g30310.1  
AT5G22480.1,AT5G37340.2 Orysa4|Os08g36774.1  
AT1G69460.1,AT1G26690.1,AT1G14010.1 Orysa4|Os07g43890.1,Orysa4|Os03g25930.1

AT1G57620.1,AT1G21900.1,AT1G09580.1 Orysa4|Os02g52920.1,Orysa4|Os06g10760.1  
AT2G03290.1,AT2G03040.1  
AT3G29070.1  
AT3G10780.1  
Orysa4|Os03g21110.1  
Orysa4|Os09g27980.1  
Orysa4|Os08g36560.1  
AT5G52030.2 Orysa4|Os08g43230.1  
AT4G27620.1,AT4G27610.1 Orysa4|Os05g51000.1,Orysa4|Os02g37130.1  
AT1G75690.1 Orysa4|Os03g14040.1  
AT2G34860.1 Orysa4|Os08g36140.1  
AT3G01435.1 Orysa4|Os02g49640.1,Orysa4|Os02g09600.1  
AT3G27530.1 Orysa4|Os12g35360.1  
AT5G64230.1 Orysa4|Os02g51820.1  
AT3G19920.1  
AT5G20520.1 Orysa4|Os07g41730.1  
AT5G10210.1,AT5G65030.1 Orysa4|Os07g43130.1  
AT1G03220.1,AT1G03230.1  
Orysa4|Os05g33400.1,Orysa4|Os09g25910.1,Orysa4|Os05g33430.1,Orysa4|Os05g33410.1  
AT5G19110.1  
AT5G19120.1  
AT5G19100.1  
Orysa4|Os01g71060.1,Orysa4|Os01g71090.1,Orysa4|Os01g71160.1,Orysa4|Os01g71140.1,Orysa4|Os01  
g71080.1  
AT4G12760.1 Orysa4|Os05g34480.1  
AT1G07970.1 Orysa4|Os03g17950.1  
AT1G03650.1 Orysa4|Os10g35680.1  
AT5G35690.1 Orysa4|Os08g39150.1  
AT5G17250.1 Orysa4|Os10g08940.1  
AT3G54826.1 Orysa4|Os02g57430.1  
AT5G30490.1 Orysa4|Os01g22500.1  
AT3G25940.1 Orysa4|Os03g50380.1  
AT3G62140.1 Orysa4|Os01g21860.1  
AT1G23790.1,AT1G70340.1,AT3G14170.1 Orysa4|Os01g01890.1  
AT1G08760.1 Orysa4|Os09g34110.1,Orysa4|Os08g42870.1  
AT4G13370.1 Orysa4|Os12g02710.1,Orysa4|Os11g02740.1  
AT3G19610.1  
Orysa4|Os03g08390.1  
Orysa4|Os11g16400.1  
Orysa4|Os04g39330.1  
AT5G48470.1 Orysa4|Os11g23790.1  
AT2G03800.1 Orysa4|Os08g25140.1  
Orysa4|Os09g07320.1  
AT5G09230.1 Orysa4|Os12g07950.1  
AT1G64185.1,AT5G41650.1 Orysa4|Os06g06420.1  
AT5G11280.1 Orysa4|Os01g37480.1  
AT1G80200.1  
AT1G75000.1,AT4G36830.1 Orysa4|Os12g43890.1  
AT1G79070.1 Orysa4|Os08g03590.1  
AT5G52220.1 Orysa4|Os09g12780.1  
AT5G38720.1 Orysa4|Os02g49620.1  
AT1G33240.1 Orysa4|Os10g37240.1,Orysa4|Os03g02240.1  
AT5G28300.1  
AT1G76880.1,AT1G76890.2  
AT5G03680.1,AT3G10000.1  
Orysa4|Os02g01380.1,Orysa4|Os02g43300.1  
AT2G37970.1 Orysa4|Os01g63210.1  
AT5G12260.1 Orysa4|Os01g18060.1  
AT5G47560.1 Orysa4|Os08g39370.1,Orysa4|Os09g31130.1  
AT5G06620.1 Orysa4|Os10g27060.1  
AT4G33410.1 Orysa4|Os10g25360.1  
AT1G76070.1,AT1G20310.1 Orysa4|Os09g37080.1  
AT4G27490.1 Orysa4|Os03g62720.1,Orysa4|Os08g02360.1  
AT3G07750.1 Orysa4|Os12g21500.1  
AT1G04940.1 Orysa4|Os01g73150.1  
AT3G22590.1 Orysa4|Os03g46190.1  
AT2G45330.1,AT5G23600.1 Orysa4|Os06g04300.1  
AT1G66680.1 Orysa4|Os01g03090.1  
Orysa4|Os01g49250.1  
AT3G56120.1 Orysa4|Os02g39370.1  
AT2G33830.2,AT1G28330.3,AT5G44300.1 Orysa4|Os11g44810.1  
AT1G20810.1 Orysa4|Os02g02550.1  
AT4G19110.2,AT5G45430.1 Orysa4|Os06g02550.1  
AT5G19010.1 Orysa4|Os11g17080.1,Orysa4|Os05g05160.1  
AT1G18040.1,AT1G73690.1 Orysa4|Os05g32600.1  
AT4G01370.1 Orysa4|Os08g06060.1  
AT1G18150.1,AT3G18040.1 Orysa4|Os02g04230.1,Orysa4|Os06g49430.1  
AT1G59580.1,AT1G10210.1 Orysa4|Os06g48590.1  
AT2G42880.1 Orysa4|Os01g43910.1  
AT2G43790.1 Orysa4|Os06g06090.1  
AT4G13020.3 Orysa4|Os03g63020.1  
AT1G01560.1

AT4G11330.1  
AT2G46070.1  
AT1G73670.1  
AT2G01450.1  
AT3G14720.1,AT1G53510.1  
AT3G45640.1  
AT3G59790.1  
Orysa4|Os02g47220.1  
Orysa4|Os06g31220.1  
Orysa4|Os01g45620.1,Orysa4|Os05g50120.1  
Orysa4|Os06g26340.1  
AT5G61290.1,AT5G07800.1  
Orysa4|Os07g02120.1,Orysa4|Os07g02130.1,Orysa4|Os01g26876.1,Orysa4|Os07g02140.1,Orysa4|Os07g02100.1  
AT1G12140.1,AT1G62540.1,AT1G63370.1,AT1G62570.1,AT1G62620.1,AT1G62560.1,AT1G62600.1,AT1G62580.1,AT1G65860.1,AT1G12200.1 Orysa4|Os10g40570.1  
AT1G12160.1,AT1G12130.1  
AT1G63340.1  
AT1G63390.1  
Orysa4|Os06g23800.1  
Orysa4|Os10g40610.1  
AT1G68100.1 Orysa4|Os08g36420.1  
AT2G34470.2 Orysa4|Os05g49050.1  
AT5G65860.1 Orysa4|Os03g55330.1  
AT4G04870.1 Orysa4|Os01g57930.1  
AT1G66330.1 Orysa4|Os05g05600.1  
AT1G21760.1 Orysa4|Os04g35190.1  
AT3G58600.1 Orysa4|Os01g42830.1  
AT1G03900.1 Orysa4|Os10g33630.1  
AT1G67325.1 Orysa4|Os08g41010.1  
Orysa4|Os07g30820.1  
AT2G19790.1 Orysa4|Os08g30480.1,Orysa4|Os10g22330.1  
AT1G47830.1 Orysa4|Os12g10560.1  
AT3G50860.1 Orysa4|Os03g12710.1  
AT4G35410.2,AT2G17380.1 Orysa4|Os03g57040.1  
Orysa4|Os01g25110.1  
Orysa4|Os03g59660.1  
AT1G03030.1 Orysa4|Os12g40880.1  
AT3G53900.2 Orysa4|Os05g38170.1  
AT4G20410.1 Orysa4|Os04g52760.1  
AT3G07790.1 Orysa4|Os06g30710.1  
AT1G05590.1 Orysa4|Os07g38790.1  
Orysa4|Os03g11980.1  
Orysa4|Os05g32410.1  
AT2G25930.1 Orysa4|Os01g38530.1,Orysa4|Os06g05060.1  
AT3G21320.1  
AT1G18060.1 Orysa4|Os01g03040.1  
AT3G49250.1 Orysa4|Os01g13404.1  
AT3G09580.1 Orysa4|Os07g43370.1  
AT5G46910.1 Orysa4|Os10g42690.1  
AT4G20400.1 Orysa4|Os05g23670.1  
AT1G30810.1,AT1G63490.1  
Orysa4|Os02g46930.1  
AT2G42130.3,AT3G58010.1 Orysa4|Os04g57020.1  
AT1G52720.1,AT3G15630.1 Orysa4|Os05g08420.1,Orysa4|Os05g09700.1  
AT2G30695.1 Orysa4|Os09g34000.1  
Orysa4|Os01g66980.1  
AT4G31790.1 Orysa4|Os03g23970.1  
AT4G00850.1,AT1G01160.1 Orysa4|Os12g31350.1  
AT2G16270.1,AT1G16630.1 Orysa4|Os03g46920.1  
Orysa4|Os01g56020.1  
AT5G63040.1 Orysa4|Os01g50830.1  
AT1G48460.1  
AT1G64385.1 Orysa4|Os05g49750.1  
AT1G60600.1 Orysa4|Os03g09060.1  
AT2G30170.1 Orysa4|Os01g07090.1  
AT4G33500.1 Orysa4|Os03g09220.1  
AT3G61540.1 Orysa4|Os06g06820.1  
AT3G50610.1 Orysa4|Os03g27680.1  
AT1G08750.1 Orysa4|Os02g12740.1  
AT2G01770.1 Orysa4|Os04g38940.1,Orysa4|Os09g23300.1  
AT1G76480.1,AT1G20890.1 Orysa4|Os03g58930.1,Orysa4|Os08g28740.1  
AT3G01640.1 Orysa4|Os11g11060.1  
AT5G14470.1  
AT2G46890.1 Orysa4|Os04g01510.1  
AT3G43300.1 Orysa4|Os07g37750.1  
AT1G01960.1,AT3G60860.1 Orysa4|Os03g14260.1  
AT4G38200.1,AT4G35380.1  
AT3G47450.1 Orysa4|Os02g01440.1  
AT4G28830.1 Orysa4|Os06g06730.1  
AT5G52880.1 Orysa4|Os05g45040.1  
AT4G01650.1 Orysa4|Os01g74010.1

AT5G42070.1 Orysa4|Os01g13390.1  
AT5G13070.1 Orysa4|Os02g48670.1,Orysa4|Os09g31190.1  
AT4G38495.1 Orysa4|Os04g20590.1  
AT4G24900.1 Orysa4|Os09g32940.1  
AT5G37130.1,AT5G17270.1 Orysa4|Os07g27180.1  
AT1G12650.1 Orysa4|Os09g35670.1  
AT1G72020.1 Orysa4|Os04g35300.1  
AT2G21820.1 Orysa4|Os08g29600.1  
Orysa4|Os01g46600.1  
AT5G39785.2 Orysa4|Os09g24700.1  
AT1G69610.1  
AT3G06200.1 Orysa4|Os03g20460.1  
AT1G78170.1,AT1G22250.1,AT4G08910.1 Orysa4|Os03g09120.1  
AT5G66290.1 Orysa4|Os03g51700.1  
AT5G52100.1 Orysa4|Os03g02690.1  
Orysa4|Os03g02570.1  
AT2G41530.1 Orysa4|Os01g71300.1  
AT5G10780.1 Orysa4|Os03g24580.1  
AT2G21180.1 Orysa4|Os03g14570.1  
AT2G40430.1 Orysa4|Os05g05220.1  
AT3G28970.1 Orysa4|Os07g43720.1  
AT1G60610.1,AT1G10650.1 Orysa4|Os02g03760.1  
AT1G45976.1 Orysa4|Os03g15730.1  
AT5G47050.1,AT1G32740.1,AT4G17680.1 Orysa4|Os02g46220.1  
Orysa4|Os11g17940.1  
AT2G31040.1 Orysa4|Os01g48300.1  
AT5G48960.1 Orysa4|Os01g14810.1  
AT2G23890.1 Orysa4|Os09g25640.1  
AT3G49550.1,AT5G24610.1 Orysa4|Os10g36550.1  
AT4G30580.1 Orysa4|Os10g35390.1  
AT1G08550.1 Orysa4|Os04g31040.1  
AT3G20790.1 Orysa4|Os09g10820.1  
AT5G15170.1 Orysa4|Os07g34598.1  
AT5G20650.1 Orysa4|Os09g26900.1  
Orysa4|Os08g35490.1  
AT4G17420.1,AT5G47420.1 Orysa4|Os03g53600.1  
AT4G20150.1 Orysa4|Os07g31490.1  
AT2G06025.1 Orysa4|Os03g07990.1  
AT1G67620.1 Orysa4|Os12g13824.1  
AT3G53970.1 Orysa4|Os07g36420.1  
AT1G48530.1  
AT3G18790.1 Orysa4|Os02g39050.1  
AT5G45360.1 Orysa4|Os06g49530.1  
AT1G01860.1 Orysa4|Os02g03050.1  
AT5G39530.1,AT5G39520.1 Orysa4|Os03g07200.1  
Orysa4|Os10g43030.1  
AT1G71480.1 Orysa4|Os09g09320.1  
AT3G05625.1 Orysa4|Os01g24090.1  
AT1G12230.1 Orysa4|Os08g05830.1  
AT5G51170.1 Orysa4|Os02g43480.1  
AT2G25830.1 Orysa4|Os05g44350.1  
AT3G61800.1 Orysa4|Os02g19170.1  
AT4G39690.1 Orysa4|Os04g54410.1  
AT5G05850.1,AT3G11330.1 Orysa4|Os04g40080.1,Orysa4|Os02g38040.1  
AT1G69545.1 Orysa4|Os01g71114.1  
AT2G17440.1,AT4G35470.1 Orysa4|Os08g40090.1  
AT4G26050.1,AT4G29880.1,AT2G19330.1 Orysa4|Os04g51580.1,Orysa4|Os10g42190.1,Orysa4|Os05g23250.1  
AT1G12970.1,AT3G26500.1  
Orysa4|Os03g63220.1  
AT5G26240.1 Orysa4|Os03g48940.1  
AT5G40890.1,AT3G27170.1 Orysa4|Os12g25200.1  
AT5G49890.1 Orysa4|Os02g35190.1  
AT5G33280.1 Orysa4|Os04g55210.1  
Orysa4|Os01g65500.1  
Orysa4|Os08g20570.1  
AT3G08650.2 Orysa4|Os05g25194.1  
AT3G62650.1,AT2G47485.1 Orysa4|Os05g29000.1,Orysa4|Os01g20730.1  
AT3G48380.1 Orysa4|Os12g18760.1  
AT1G19020.1,AT3G48180.1 Orysa4|Os06g13190.1,Orysa4|Os02g50710.1  
AT5G18200.1 Orysa4|Os07g07550.1  
AT5G15700.1 Orysa4|Os09g07120.1  
AT1G68990.1  
AT2G24120.1  
AT3G51980.1 Orysa4|Os09g33780.1  
AT4G24680.1 Orysa4|Os12g37860.1  
Orysa4|Os11g46250.1  
AT5G13220.1 Orysa4|Os04g32480.1  
AT1G48050.1 Orysa4|Os03g63920.1  
AT4G08930.1,AT1G34780.1 Orysa4|Os02g51850.1  
AT3G03860.1,AT5G18120.1 Orysa4|Os03g59170.1  
Orysa4|Os12g35640.1  
AT1G49975.1 Orysa4|Os03g52130.1

AT3G13480.1,AT1G55475.1 Orysa4|Os03g58090.1  
AT3G01420.1 Orysa4|Os12g26290.1  
AT1G73680.1  
AT3G53630.1 Orysa4|Os03g17140.1  
AT5G45590.1 Orysa4|Os10g42860.1  
AT5G04520.1 Orysa4|Os03g24830.1  
AT5G06260.1 Orysa4|Os12g06100.1  
AT4G34070.1  
AT4G38440.1 Orysa4|Os06g37640.1  
AT1G17050.1,AT1G78510.1 Orysa4|Os05g50550.1  
AT2G34630.2 Orysa4|Os06g46450.1  
Orysa4|Os12g17320.1  
Orysa4|Os08g09370.1  
AT2G17695.1 Orysa4|Os04g02890.1,Orysa4|Os03g01730.1  
AT4G20910.1,AT4G20920.1 Orysa4|Os07g06970.1  
AT5G67490.1 Orysa4|Os06g06330.1  
AT1G56345.1 Orysa4|Os12g37380.1  
AT2G44520.1 Orysa4|Os01g34390.1  
AT3G09250.1 Orysa4|Os02g54710.1,Orysa4|Os01g54960.1  
AT1G73180.1 Orysa4|Os02g39350.1  
AT4G29520.1 Orysa4|Os06g05740.1  
AT5G50960.1 Orysa4|Os02g38900.1  
AT1G47490.1,AT1G49600.1,AT3G19130.1,AT1G47500.1  
Orysa4|Os09g28810.1,Orysa4|Os02g35950.1,Orysa4|Os04g37690.1  
AT5G54900.1,AT4G27000.1  
Orysa4|Os07g33330.1,Orysa4|Os08g09100.1,Orysa4|Os04g53440.1,Orysa4|Os03g37270.1  
AT5G19350.1 Orysa4|Os03g07800.1  
AT1G11650.2  
AT3G11620.1 Orysa4|Os01g72870.1  
AT4G23910.1,AT4G10970.1 Orysa4|Os08g28690.1  
AT5G45420.1 Orysa4|Os08g06240.1  
AT5G42970.1 Orysa4|Os03g10120.1  
AT4G23895.1 Orysa4|Os05g51710.1  
AT5G64040.1 Orysa4|Os12g08770.1  
AT3G60810.1 Orysa4|Os03g64140.1  
AT1G11720.1 Orysa4|Os04g53310.1  
AT4G18240.1 Orysa4|Os05g45720.1,Orysa4|Os01g52250.1  
AT5G65685.1 Orysa4|Os02g56320.1  
Orysa4|Os08g09230.1  
AT5G20660.1 Orysa4|Os04g43916.1  
AT4G38110.1 Orysa4|Os08g05670.1  
AT4G37830.1 Orysa4|Os03g56190.1  
AT5G37360.1 Orysa4|Os02g57030.1  
AT3G28670.1 Orysa4|Os10g11110.1,Orysa4|Os08g01110.1  
AT4G01320.1 Orysa4|Os02g45650.1  
AT2G26470.1 Orysa4|Os06g27650.1  
AT1G80770.1 Orysa4|Os08g06230.1  
AT4G29440.1,AT2G19710.1 Orysa4|Os01g51010.1  
AT1G13340.1 Orysa4|Os03g50210.1  
AT1G34220.1 Orysa4|Os08g07830.1  
AT1G25420.1 Orysa4|Os01g49350.1  
AT4G35730.1 Orysa4|Os09g37510.1  
AT3G15490.1  
AT1G51900.1  
AT2G14830.1  
Orysa4|Os03g15230.1,Orysa4|Os03g15220.1,Orysa4|Os03g15210.1  
AT2G31440.1 Orysa4|Os02g17280.1  
AT1G17870.1 Orysa4|Os03g51920.1  
AT3G12030.1,AT5G06660.1 Orysa4|Os03g51160.1  
AT2G36305.1 Orysa4|Os05g28950.1  
AT3G13226.1 Orysa4|Os04g57230.1  
AT4G29170.1 Orysa4|Os09g10850.1  
AT1G32520.1 Orysa4|Os11g11330.1  
AT3G20430.1 Orysa4|Os01g37842.1  
AT5G09250.1,AT5G09240.2 Orysa4|Os02g34840.1  
AT4G21060.1 Orysa4|Os12g41956.1,Orysa4|Os08g03670.1  
AT1G26810.1 Orysa4|Os06g12390.1  
AT3G06440.1 Orysa4|Os01g22550.1  
AT1G74800.1,AT5G62620.1 Orysa4|Os03g58920.1,Orysa4|Os07g09690.1  
AT1G27120.1  
Orysa4|Os02g36770.1  
Orysa4|Os03g58900.1,Orysa4|Os07g09670.1  
AT3G26380.1 Orysa4|Os01g33420.1  
AT3G51130.1 Orysa4|Os06g49990.1  
AT3G12260.1 Orysa4|Os07g44650.1  
AT4G15770.1 Orysa4|Os07g47420.1  
AT1G09230.1 Orysa4|Os03g21020.1  
AT5G41150.1 Orysa4|Os03g01100.1  
AT1G26660.1 Orysa4|Os07g40460.1  
AT1G01480.1,AT4G11280.1,AT3G61510.1 Orysa4|Os04g48850.1  
AT2G22810.1,AT3G49700.1,AT4G37770.1,AT5G65800.1 Orysa4|Os03g51740.1  
AT5G51690.1 Orysa4|Os06g03990.1

AT5G28360.1  
 AT4G08040.1  
 AT1G62960.1  
 AT5G49970.1 Orysa4|Os10g23120.1  
 AT1G22750.2 Orysa4|Os06g38320.1  
 AT1G65420.1 Orysa4|Os09g11520.1  
 AT3G56830.1  
 AT3G49080.1 Orysa4|Os07g46440.1  
 AT3G17465.1 Orysa4|Os01g14830.1  
 AT5G01230.1 Orysa4|Os06g49140.1  
 AT2G25950.1 Orysa4|Os01g37832.1  
 AT3G19820.1 Orysa4|Os10g25780.1  
 AT1G13750.1 Orysa4|Os03g11530.1,Orysa4|Os12g38760.1,Orysa4|Os12g38750.1  
 AT2G03450.1,AT1G13900.1 Orysa4|Os07g02090.1  
 AT5G50400.1  
 Orysa4|Os12g38770.1  
 AT2G47960.1 Orysa4|Os10g35570.1  
 AT3G55160.1 Orysa4|Os08g07290.1  
 AT2G30350.2 Orysa4|Os07g12710.1  
 AT1G67690.1 Orysa4|Os01g67590.1  
 AT2G07340.1 Orysa4|Os02g26440.1  
 AT1G64510.1 Orysa4|Os03g62630.1  
 AT3G16270.1 Orysa4|Os01g13160.1  
 AT1G78590.1 Orysa4|Os09g17680.1  
 AT2G20690.1 Orysa4|Os12g35580.1  
 AT5G02160.1 Orysa4|Os05g01950.1  
 AT2G19560.1 Orysa4|Os09g21760.1  
 AT1G02680.1 Orysa4|Os01g23630.1  
 AT3G15660.1 Orysa4|Os01g07950.1,Orysa4|Os01g34620.1  
 AT4G04950.1 Orysa4|Os10g35720.1  
 AT3G54900.1 Orysa4|Os03g63420.1  
 AT2G38270.1 Orysa4|Os12g07650.1  
 AT4G32580.1  
 AT1G48175.1 Orysa4|Os03g20570.1  
 AT2G37330.1 Orysa4|Os05g02750.1  
 AT3G55250.1 Orysa4|Os05g45030.1  
 AT5G01630.1,AT4G00010.1,AT4G00020.1 Orysa4|Os01g07110.1  
 AT4G01040.1 Orysa4|Os01g43220.1  
 AT1G07210.1 Orysa4|Os10g35690.1  
 AT1G11480.1 Orysa4|Os07g36200.1  
 AT1G75450.1 Orysa4|Os01g56810.1  
 AT2G41510.1 Orysa4|Os01g71310.1,Orysa4|Os05g31040.1  
 AT2G19500.1,AT5G56970.1,AT4G29740.2  
 Orysa4|Os01g09260.1,Orysa4|Os01g10110.1,Orysa4|Os06g37500.1,Orysa4|Os02g12780.1  
 AT3G63440.1  
 Orysa4|Os04g44230.1,Orysa4|Os10g34230.1  
 AT5G48790.1 Orysa4|Os02g03670.1  
 AT1G48170.1 Orysa4|Os12g08230.1  
 AT5G47570.1 Orysa4|Os10g40410.1  
 AT1G76060.1 Orysa4|Os03g04380.1  
 AT3G26570.1 Orysa4|Os02g38020.1  
 AT4G17760.1 Orysa4|Os06g04190.1  
 AT3G11680.1,AT1G08440.1,AT1G08430.1,AT2G27240.1 Orysa4|Os04g34010.1  
 AT5G46610.1,AT4G17970.1,AT5G46600.1 Orysa4|Os10g42180.1  
 AT4G17585.1  
 AT4G24620.1 Orysa4|Os09g29070.1,Orysa4|Os08g37380.1  
 AT1G73740.1 Orysa4|Os01g33230.1  
 AT4G32750.1 Orysa4|Os02g17250.1  
 AT1G14450.1,AT2G02510.1 Orysa4|Os02g35610.1  
 AT1G34630.1 Orysa4|Os03g09090.1  
 AT5G19300.1 Orysa4|Os04g17064.1  
 AT3G10220.1 Orysa4|Os04g59560.1  
 AT5G11680.1 Orysa4|Os09g33800.1  
 AT2G28710.1,AT3G46070.1,AT5G59820.1 Orysa4|Os05g38620.1,Orysa4|Os03g60540.1,Orysa4|Os01g62130.1  
 AT2G28200.1,AT5G04390.1,AT3G10470.1,AT5G03510.1 Orysa4|Os02g57790.1,Orysa4|Os04g08060.1  
 AT3G46090.1,AT3G46080.1  
 AT2G37430.1  
 Orysa4|Os03g60560.1,Orysa4|Os01g62190.1,Orysa4|Os03g60570.1,Orysa4|Os11g47620.1  
 Orysa4|Os09g03500.1  
 AT3G05410.1 Orysa4|Os01g70820.1  
 AT5G19540.1 Orysa4|Os08g29780.1  
 AT1G67840.1 Orysa4|Os12g19530.1  
 AT5G41880.1 Orysa4|Os05g29010.1  
 AT1G62780.1 Orysa4|Os04g01540.1  
 AT4G20070.1 Orysa4|Os06g45480.1  
 Orysa4|Os02g47430.1  
 AT5G49570.1 Orysa4|Os07g31460.1  
 AT3G18570.1,AT1G48990.1 Orysa4|Os05g50110.1  
 AT5G51210.1,AT4G25140.1 Orysa4|Os04g46200.1  
 AT5G07520.1,AT5G07600.1,AT5G07550.1  
 AT2G25890.1  
 AT5G61610.1

AT5G07560.1  
     Orysa4|Os01g45624.1  
     Orysa4|Os09g15520.1  
 AT4G02405.1    Orysa4|Os07g14350.1  
 AT3G46220.1    Orysa4|Os05g02650.1  
 AT1G31410.1    Orysa4|Os04g51310.1  
 AT2G25735.1    Orysa4|Os01g08670.1  
 AT5G07960.1    Orysa4|Os03g54980.1  
 AT4G03090.1    Orysa4|Os05g09630.1  
 AT5G39250.1    Orysa4|Os03g30920.1  
 AT1G16445.1    Orysa4|Os05g43582.1  
 AT2G48070.1    Orysa4|Os05g33520.1  
 AT1G30130.1    Orysa4|Os07g05870.1  
 AT3G15160.1    Orysa4|Os04g53530.1  
 AT5G12930.1    Orysa4|Os09g31350.1  
 AT1G55915.1    Orysa4|Os06g09170.1  
 AT5G39590.1    Orysa4|Os04g56790.1  
 AT5G16060.1    Orysa4|Os03g15240.1  
 AT5G50110.1    Orysa4|Os06g13170.1  
 AT5G53310.1    Orysa4|Os01g43360.1  
 AT1G09420.1    Orysa4|Os03g20300.1  
 AT1G24280.1,AT5G13110.1    Orysa4|Os07g22350.1  
 AT3G27300.1,AT5G40760.1    Orysa4|Os02g38840.1  
 AT5G35790.1  
 AT1G01240.1,AT2G46550.1    Orysa4|Os08g30930.1,Orysa4|Os09g19890.1  
 AT1G73240.1    Orysa4|Os02g45920.1  
 AT5G48020.1    Orysa4|Os02g48630.1  
 AT3G04560.1    Orysa4|Os02g57500.1  
 AT4G08540.1    Orysa4|Os07g43322.1  
 AT1G77890.1  
 AT5G66820.1    Orysa4|Os03g08740.1  
 AT1G20410.1    Orysa4|Os04g47380.1  
 AT2G05320.1    Orysa4|Os02g55470.1  
 AT2G24860.1    Orysa4|Os09g25590.1  
 AT3G49940.1,AT4G37540.1,AT5G67420.1    Orysa4|Os07g40000.1,Orysa4|Os03g33090.1  
 AT3G02550.1,AT1G67100.1    Orysa4|Os01g32770.1,Orysa4|Os01g03890.1  
 AT1G68510.1  
     Orysa4|Os03g41330.1  
 AT3G27050.1    Orysa4|Os11g29700.1  
 AT2G21370.1    Orysa4|Os07g22650.1  
 AT2G17972.1    Orysa4|Os06g50130.1  
 AT1G76450.1    Orysa4|Os08g40160.1  
 AT2G29530.1    Orysa4|Os07g13950.1  
 AT3G15840.1    Orysa4|Os03g38950.1  
 AT5G51330.1    Orysa4|Os12g42820.1,Orysa4|Os12g42830.1,Orysa4|Os03g44760.1  
 AT4G18460.1    Orysa4|Os01g14040.1  
 AT5G42850.1    Orysa4|Os06g21550.1  
 AT3G14810.1,AT1G53470.1,AT1G78610.1    Orysa4|Os02g44770.1  
 AT2G17000.1  
 AT2G17010.1  
 AT5G10620.1    Orysa4|Os04g51786.1  
 AT5G08170.1    Orysa4|Os04g39210.1  
 AT5G40530.2    Orysa4|Os02g38060.1  
 AT1G72560.1    Orysa4|Os07g42180.1  
 AT3G13440.1    Orysa4|Os03g60920.1  
 AT3G59390.1    Orysa4|Os11g16560.1  
 AT4G00560.1    Orysa4|Os02g57990.1  
 AT4G03200.1    Orysa4|Os01g70950.1  
 AT2G47940.1    Orysa4|Os05g05480.1  
 AT5G40200.1    Orysa4|Os06g12780.1,Orysa4|Os02g50880.1  
 AT5G36950.1    Orysa4|Os05g34460.1  
 AT3G16550.1,AT1G65630.1,AT3G16540.1,AT1G65640.1  
 AT1G51150.1,AT5G54745.1  
 AT5G40560.1  
 AT1G54700.1  
 AT2G26460.1    Orysa4|Os11g04950.1,Orysa4|Os12g04940.1  
 AT4G21105.1    Orysa4|Os07g45320.1,Orysa4|Os02g06650.1  
 AT1G49820.1    Orysa4|Os04g57400.1  
 AT2G03420.1    Orysa4|Os03g11230.1  
 AT1G02870.1    Orysa4|Os05g30420.1  
 AT5G32470.1    Orysa4|Os08g45160.1  
 AT2G21070.1    Orysa4|Os02g02880.1  
 AT5G48390.1    Orysa4|Os01g66690.1  
 AT3G06610.1    Orysa4|Os03g61680.1  
 AT4G10265.1,AT4G10270.1    Orysa4|Os04g54240.1,Orysa4|Os04g54300.1,Orysa4|Os04g54310.1  
 AT2G14070.1,AT4G33560.1  
     Orysa4|Os04g54230.1  
     Orysa4|Os08g08090.1  
     Orysa4|Os06g46970.1,Orysa4|Os02g06560.1  
 AT1G11760.1    Orysa4|Os10g40070.1  
     Orysa4|Os03g10080.1,Orysa4|Os02g10400.1  
 AT5G10810.1    Orysa4|Os02g39830.1



AT3G17900.1 Orysa4|Os03g05812.1  
AT5G04910.1 Orysa4|Os01g16080.1  
AT5G12130.1 Orysa4|Os05g03000.1  
AT1G02180.1 Orysa4|Os02g58740.1  
Orysa4|Os08g35710.1  
AT5G51130.1 Orysa4|Os08g42760.1  
AT3G47650.1 Orysa4|Os06g22690.1  
AT5G19820.1 Orysa4|Os03g49420.1,Orysa4|Os07g38760.1  
AT4G27640.1 Orysa4|Os03g15540.1  
AT4G23860.1 Orysa4|Os06g33810.1  
AT2G03510.1 Orysa4|Os03g30790.1  
AT3G58830.1 Orysa4|Os01g58390.1  
AT4G33925.1 Orysa4|Os07g40310.1  
AT5G16940.1 Orysa4|Os09g23370.1  
AT4G24090.1 Orysa4|Os09g35990.1  
AT2G30942.1 Orysa4|Os07g26550.1,Orysa4|Os07g26520.1  
AT1G16300.1,AT1G79530.1 Orysa4|Os02g07490.1,Orysa4|Os06g45590.1  
AT3G29010.1 Orysa4|Os08g33810.1  
AT1G53120.1 Orysa4|Os01g54390.1  
AT2G44870.1 Orysa4|Os10g41940.1  
AT2G41120.1 Orysa4|Os11g03580.1,Orysa4|Os12g03350.1  
Orysa4|Os05g22630.1  
AT1G44920.1 Orysa4|Os03g51930.1  
AT3G05070.1 Orysa4|Os06g51420.1  
AT4G34700.1 Orysa4|Os06g50000.1  
AT3G54360.1 Orysa4|Os02g55200.1,Orysa4|Os01g01420.1  
AT5G51220.1 Orysa4|Os07g30790.1  
AT1G19800.1 Orysa4|Os04g46700.1  
AT5G40670.1 Orysa4|Os12g18110.1  
AT3G58490.1 Orysa4|Os03g59070.1  
AT1G06590.1 Orysa4|Os12g43120.1  
AT1G31170.1 Orysa4|Os06g07760.1  
AT3G07600.1,AT5G48290.1  
Orysa4|Os04g39350.1,Orysa4|Os04g39010.1,Orysa4|Os02g37300.1,Orysa4|Os04g39370.1,Orysa4|Os04  
g39380.1,Orysa4|Os04g39360.1  
AT4G05030.1  
AT3G20180.1  
Orysa4|Os09g09930.1  
Orysa4|Os02g37330.1,Orysa4|Os02g37320.1  
AT4G21150.1 Orysa4|Os01g68324.1  
AT5G27560.1 Orysa4|Os06g05390.1  
AT1G53710.1 Orysa4|Os03g27950.1  
AT1G66510.1 Orysa4|Os04g04320.1  
AT2G47770.1 Orysa4|Os05g05930.1  
AT5G11810.1 Orysa4|Os02g04260.1  
AT3G14940.1,AT1G53310.1 Orysa4|Os09g14670.1,Orysa4|Os08g27840.1  
AT1G68750.1 Orysa4|Os01g02050.1  
AT3G42628.1,AT2G42600.1  
Orysa4|Os01g55350.1  
Orysa4|Os02g14770.1  
Orysa4|Os01g54230.1  
AT1G74300.1,AT1G74280.1,AT2G36290.1,AT1G74290.1,AT3G48410.1  
Orysa4|Os04g33590.1,Orysa4|Os02g32970.1,Orysa4|Os04g33600.1  
AT3G54240.1  
Orysa4|Os10g37720.1,Orysa4|Os03g02514.1,Orysa4|Os10g37710.1  
Orysa4|Os10g37700.1,Orysa4|Os01g63990.1  
Orysa4|Os12g05600.1  
AT2G14740.1,AT2G14720.1 Orysa4|Os10g20630.1  
AT3G52850.1 Orysa4|Os12g02390.1,Orysa4|Os07g48229.1  
AT4G20110.1,AT2G34940.1,AT1G30900.1 Orysa4|Os06g45380.1,Orysa4|Os04g52190.1  
AT2G30290.1  
Orysa4|Os03g21720.1  
AT3G12120.1 Orysa4|Os07g23430.1,Orysa4|Os07g23410.1,Orysa4|Os02g48560.1  
AT1G54570.1 Orysa4|Os01g26039.1  
AT5G41130.1,AT5G41120.1,AT3G26840.1,AT3G26820.1 Orysa4|Os09g33530.1  
AT3G02030.1  
Orysa4|Os01g25990.1  
Orysa4|Os01g26000.1  
AT3G14510.1,AT2G18640.1,AT3G14550.1,AT2G18620.1,AT2G23800.1,AT4G36810.1,AT3G29430.1,AT3G14530.1,A  
T3G20160.1,AT3G32040.1 Orysa4|Os07g39270.1  
AT4G38460.1 Orysa4|Os02g44780.1  
AT3G29420.1  
AT1G49530.1  
Orysa4|Os05g14580.1  
Orysa4|Os01g14630.1  
AT1G68220.1 Orysa4|Os08g16130.1  
AT1G13380.1 Orysa4|Os09g10910.1  
AT1G52910.1,AT3G15480.1 Orysa4|Os07g27810.1  
AT4G27435.1  
AT1G61065.1  
Orysa4|Os10g35294.1  
AT5G14740.1,AT1G70410.2,AT1G23730.1,AT3G01500.2 Orysa4|Os01g45274.1

AT5G56450.1 Orysa4|Os05g46220.1  
AT5G13490.1,AT3G08580.1 Orysa4|Os02g48720.1  
AT4G28390.1 Orysa4|Os05g23720.1  
AT5G17400.1 Orysa4|Os11g43960.1  
AT4G33080.1 Orysa4|Os01g09200.1  
AT3G23310.1,AT4G14350.1 Orysa4|Os12g19290.1,Orysa4|Os05g43570.1  
AT2G19400.1  
AT5G09890.2  
AT1G30640.1  
Orysa4|Os10g33640.1  
AT4G38380.1 Orysa4|Os09g37610.1  
AT2G38330.1 Orysa4|Os12g01580.1  
AT1G51340.2 Orysa4|Os10g13940.1  
Orysa4|Os02g58620.1  
Orysa4|Os04g10230.1  
Orysa4|Os12g06050.1,Orysa4|Os01g69010.1,Orysa4|Os12g25160.1,Orysa4|Os05g33910.1,Orysa4|Os03  
g11734.1  
AT5G35970.1 Orysa4|Os09g04440.1  
Orysa4|Os02g47560.1  
AT3G16300.1 Orysa4|Os01g52610.1  
AT1G79780.1  
AT4G38500.1 Orysa4|Os06g50860.1  
AT5G42660.1 Orysa4|Os01g54530.1  
AT1G28240.1 Orysa4|Os05g45490.1,Orysa4|Os01g19870.1  
AT1G34550.1,AT4G09630.1 Orysa4|Os11g09170.1  
AT1G53040.1  
AT2G02910.1  
Orysa4|Os03g55920.1  
AT5G02830.1 Orysa4|Os03g17634.1  
AT3G01510.1 Orysa4|Os08g29160.1  
AT2G30710.1 Orysa4|Os09g34040.1  
AT1G21710.1 Orysa4|Os02g34750.1  
AT1G14560.1 Orysa4|Os01g51250.1,Orysa4|Os01g38990.1  
AT4G01100.1 Orysa4|Os05g50840.1  
AT5G46800.1 Orysa4|Os10g42299.1  
AT3G53940.1,AT2G37890.1 Orysa4|Os01g04990.1,Orysa4|Os03g16080.1  
AT4G26180.1 Orysa4|Os02g13300.1  
AT4G32400.1 Orysa4|Os05g07900.1,Orysa4|Os06g40050.1  
AT1G79900.1 Orysa4|Os01g12520.1  
AT5G64970.1 Orysa4|Os03g09110.1  
AT2G30160.1,AT4G39460.1,AT5G48970.1,AT2G47490.1,AT1G78180.1,AT3G51870.1,AT2G33820.1,AT3G20240.1,A  
T3G55640.1,AT1G07030.1,AT5G42130.1,AT5G01500.1,AT1G34065.1,AT5G66380.1,AT3G21390.1  
Orysa4|Os07g19460.1,Orysa4|Os05g28870.1,Orysa4|Os08g40850.1,Orysa4|Os01g70800.1,Orysa4|Os03  
g52430.1,Orysa4|Os03g11510.1,Orysa4|Os02g44570.1,Orysa4|Os09g32200.1,Orysa4|Os11g23170.1,Orysa4|Os01g  
16040.1,Orysa4|Os07g24060.1  
AT1G25380.1  
AT4G11440.1  
AT1G74240.1  
AT4G09890.1 Orysa4|Os06g47220.1  
AT5G11970.1 Orysa4|Os01g38660.1  
AT2G19460.1  
AT3G18610.1 Orysa4|Os04g52960.1  
AT3G16175.1 Orysa4|Os01g12910.1,Orysa4|Os01g12920.1  
AT2G31710.1,AT1G05780.1 Orysa4|Os04g52300.1  
AT5G49880.1 Orysa4|Os01g65580.1  
AT2G37080.1 Orysa4|Os05g03120.1  
AT5G60210.1  
AT5G15880.1 Orysa4|Os09g02130.1  
AT1G72990.1 Orysa4|Os05g46200.1  
AT5G42750.1 Orysa4|Os09g28550.1,Orysa4|Os08g36970.1  
AT5G06760.1 Orysa4|Os08g23870.1  
Orysa4|Os09g10620.1  
Orysa4|Os06g21910.1  
AT5G53430.1,AT4G27910.1 Orysa4|Os01g11952.1  
AT5G42400.1 Orysa4|Os12g41900.1  
AT3G61740.1  
Orysa4|Os01g46700.1  
AT3G15000.1 Orysa4|Os09g33480.1  
AT1G53260.1  
AT4G26750.1 Orysa4|Os06g20390.1  
AT4G24500.1 Orysa4|Os02g30640.1  
AT5G38195.1,AT5G38160.1,AT5G38170.1,AT1G66850.1  
Orysa4|Os10g36070.1,Orysa4|Os10g36090.1,Orysa4|Os10g36170.1,Orysa4|Os03g02050.1,Orysa4|Os05  
g47700.1  
AT1G48750.1,AT3G18280.1  
AT1G73780.1  
Orysa4|Os10g36160.1,Orysa4|Os10g36110.1  
AT5G26960.1 Orysa4|Os11g04330.1,Orysa4|Os03g30160.1,Orysa4|Os12g04130.1  
AT5G55100.2 Orysa4|Os01g50320.1  
AT4G28990.1 Orysa4|Os02g17470.1,Orysa4|Os06g22700.1  
AT2G33793.1 Orysa4|Os03g62160.1  
Orysa4|Os07g10810.1

AT3G51650.1,AT3G51640.1 Orysa4|Os11g02190.1,Orysa4|Os12g02130.1  
AT4G21820.1 Orysa4|Os07g33370.1  
AT2G44820.1 Orysa4|Os01g12480.1  
AT4G27745.1 Orysa4|Os12g29960.1  
AT2G40110.1 Orysa4|Os03g49150.1  
AT4G27740.1  
AT3G08990.1  
AT3G11230.1  
AT5G53940.1  
AT3G55890.1  
Orysa4|Os10g22410.1,Orysa4|Os03g09290.1  
AT4G08980.1 Orysa4|Os06g11630.1,Orysa4|Os02g52130.1  
Orysa4|Os04g37590.1  
AT2G32850.2 Orysa4|Os02g37880.1  
Orysa4|Os09g10720.1  
AT1G04210.1 Orysa4|Os03g53250.1  
AT5G22320.1 Orysa4|Os01g73560.1  
AT2G14560.1,AT3G11740.1,AT5G01750.2,AT1G33840.1 Orysa4|Os07g12730.1  
AT3G16900.1  
AT3G56180.1  
Orysa4|Os03g60220.1,Orysa4|Os03g60210.1  
Orysa4|Os05g27340.1  
AT1G26620.1,AT1G69360.1,AT1G13940.1 Orysa4|Os03g55130.1,Orysa4|Os12g38870.1  
AT1G12120.1,AT1G62530.1 Orysa4|Os10g40580.1  
AT1G17690.1 Orysa4|Os05g22920.1  
AT1G22870.1,AT1G71410.1 Orysa4|Os01g42950.1  
AT3G17950.1 Orysa4|Os06g14530.1,Orysa4|Os02g50050.1  
AT2G22840.1,AT4G37740.1 Orysa4|Os12g29980.1,Orysa4|Os03g51970.1  
Orysa4|Os03g47140.1  
Orysa4|Os11g35030.1  
AT1G04190.1 Orysa4|Os12g41190.1  
AT5G03160.1 Orysa4|Os02g10180.1,Orysa4|Os01g74580.1  
AT1G56440.1 Orysa4|Os05g03910.1  
AT1G33400.1 Orysa4|Os10g36250.1  
AT4G13530.1,AT4G10080.1 Orysa4|Os01g66150.1  
Orysa4|Os02g35220.1  
AT5G26180.1 Orysa4|Os02g12600.1  
AT4G23060.1 Orysa4|Os04g48160.1  
AT2G29720.1,AT2G35660.1 Orysa4|Os07g30960.1  
AT4G38540.1,AT5G05320.1  
Orysa4|Os03g05920.1,Orysa4|Os03g05910.1,Orysa4|Os03g05900.1,Orysa4|Os03g05880.1  
Orysa4|Os04g34580.1  
Orysa4|Os03g05860.1,Orysa4|Os03g05990.1  
Orysa4|Os03g05840.1  
AT3G63330.1 Orysa4|Os11g37540.1  
AT4G29070.1 Orysa4|Os07g46420.1  
AT5G64630.2 Orysa4|Os08g01680.1  
AT5G07250.1 Orysa4|Os08g43320.1,Orysa4|Os09g35730.1,Orysa4|Os03g02530.1  
AT2G29050.1,AT3G53780.2 Orysa4|Os11g47840.1  
AT1G12750.1,AT1G63120.1  
AT1G77860.1  
AT4G23070.1  
AT1G52580.1  
Orysa4|Os10g37760.1  
Orysa4|Os01g05430.1  
AT4G10930.1 Orysa4|Os12g10700.1  
AT4G10940.1  
AT4G17330.1 Orysa4|Os10g41030.1  
AT5G52910.1 Orysa4|Os05g11980.1  
AT3G02680.1 Orysa4|Os10g34580.1  
AT4G20350.1 Orysa4|Os10g28410.1  
AT1G68480.1 Orysa4|Os01g03840.1  
AT1G13400.1  
AT1G32550.1 Orysa4|Os03g48040.1  
AT2G35900.1 Orysa4|Os01g56470.1  
AT2G15780.1,AT2G15770.1,AT4G33930.1 Orysa4|Os06g11310.1  
AT1G65900.1 Orysa4|Os03g02820.1  
AT2G01990.1,AT1G14630.1 Orysa4|Os08g36380.1,Orysa4|Os02g53280.1  
AT1G30960.1 Orysa4|Os08g10649.1  
AT3G55290.1,AT1G63380.1,AT1G62610.3,AT3G46170.1,AT2G17845.1,AT3G55310.1 Orysa4|Os08g39960.1  
AT1G54870.1,AT3G05260.1 Orysa4|Os05g04870.1  
AT4G13180.1,AT3G03980.1 Orysa4|Os03g53690.1,Orysa4|Os06g08600.1  
AT3G26770.1,AT4G03140.1,AT3G26760.1  
Orysa4|Os07g46930.1,Orysa4|Os07g46920.1,Orysa4|Os07g40250.1,Orysa4|Os11g32030.1  
AT3G51680.1 Orysa4|Os07g49120.1,Orysa4|Os03g18740.1  
AT1G10310.1 Orysa4|Os02g35170.1  
AT5G65205.1,AT5G10050.1 Orysa4|Os04g38420.1  
AT2G47120.1,AT2G47130.1,AT2G47140.1,AT3G29260.1 Orysa4|Os03g61740.1  
AT1G52340.1 Orysa4|Os03g59610.1  
AT3G42960.1  
AT2G47150.1,AT3G29250.1  
Orysa4|Os07g37420.1,Orysa4|Os07g07450.1

Orysa4|Os10g31780.1  
Orysa4|Os07g46940.1,Orysa4|Os12g16010.1,Orysa4|Os07g46840.1,Orysa4|Os07g46846.1,Orysa4|Os07g46860.1,Orysa4|Os07g46870.1,Orysa4|Os07g46830.1,Orysa4|Os07g46852.1,Orysa4|Os07g46970.1,Orysa4|Os07g46980.1  
Orysa4|Os04g10010.1,Orysa4|Os04g10000.1,Orysa4|Os04g33240.1  
AT2G18030.1 Orysa4|Os06g04650.1  
AT4G25130.1 Orysa4|Os10g41400.1  
AT5G07470.1,AT5G61640.1  
AT5G07460.1  
Orysa4|Os04g40600.1  
AT3G62330.1 Orysa4|Os01g14920.1  
AT5G22040.1 Orysa4|Os03g16730.1  
AT4G29250.1 Orysa4|Os03g53360.1  
AT1G03530.1 Orysa4|Os05g42300.1  
AT4G03380.1  
AT1G78810.1 Orysa4|Os01g55420.1,Orysa4|Os06g06014.1  
AT2G20590.1,AT4G28430.1 Orysa4|Os02g19990.1  
AT3G15580.1,AT3G06420.1 Orysa4|Os11g01010.1  
AT1G62040.1 Orysa4|Os08g09240.1,Orysa4|Os04g53240.1  
AT4G16520.1,AT2G45170.1  
AT4G04620.1,AT4G21980.1  
AT2G05630.1  
AT3G60640.1  
AT5G16610.2 Orysa4|Os03g12120.1  
AT3G19180.1 Orysa4|Os04g57920.1  
AT5G10790.1 Orysa4|Os04g55360.1  
AT3G16570.1,AT1G02900.1,AT4G15800.1,AT3G05490.1 Orysa4|Os01g15320.1,Orysa4|Os12g35670.1  
AT1G28270.1,AT2G33775.1  
AT3G23805.1,AT4G13950.1  
Orysa4|Os12g35690.1,Orysa4|Os10g18170.1,Orysa4|Os02g44940.1,Orysa4|Os01g25560.1,Orysa4|Os01g70690.1  
Orysa4|Os03g22440.1  
Orysa4|Os04g54090.1,Orysa4|Os01g10470.1,Orysa4|Os05g11330.1  
AT1G57600.1 Orysa4|Os05g05200.1  
AT5G38520.1 Orysa4|Os05g34630.1  
AT4G25650.2 Orysa4|Os03g59100.1,Orysa4|Os03g59110.1,Orysa4|Os03g59120.1  
Orysa4|Os03g59090.1,Orysa4|Os03g59152.1  
AT2G18850.1 Orysa4|Os08g14660.1  
AT4G12640.1 Orysa4|Os09g12730.1  
AT1G07980.1 Orysa4|Os03g63530.1  
AT2G19430.1 Orysa4|Os09g19900.1  
ATCG00890.1,ATCG01250.1 Orysa4|Os01g58060.1,Orysa4|Os02g24580.1  
Orysa4|Os02g24590.1  
AT3G18370.1 Orysa4|Os01g03820.1  
AT5G58220.1 Orysa4|Os03g27320.1  
AT1G78430.1,AT1G17140.1 Orysa4|Os01g55280.1,Orysa4|Os05g43870.1  
AT5G18530.1 Orysa4|Os01g22390.1  
AT5G18525.1  
AT3G07530.1 Orysa4|Os03g13960.1  
AT4G19830.1 Orysa4|Os02g07220.1  
AT4G26555.1 Orysa4|Os02g10590.1  
AT5G46840.1 Orysa4|Os03g63730.1  
AT2G21290.1 Orysa4|Os09g35900.1  
AT1G01880.1 Orysa4|Os09g35000.1  
AT1G15980.1 Orysa4|Os08g17390.1  
AT2G22080.1 Orysa4|Os04g54430.1  
AT2G11910.1 Orysa4|Os09g38400.1  
AT3G50550.1  
Orysa4|Os02g09140.1  
AT4G35320.1,AT2G17300.1 Orysa4|Os08g40060.1  
AT1G55590.1 Orysa4|Os08g39060.1  
AT2G42620.1 Orysa4|Os06g06050.1  
AT3G54650.1 Orysa4|Os03g43390.1,Orysa4|Os12g40860.1  
AT5G67140.1 Orysa4|Os06g07000.1  
AT4G13220.1 Orysa4|Os12g17830.1  
AT3G48670.1,AT3G12550.1  
Orysa4|Os05g06130.1,Orysa4|Os01g44230.1,Orysa4|Os01g03570.1,Orysa4|Os02g19130.1  
AT5G59390.1,AT4G01180.1,AT1G13790.1  
AT4G01780.1  
AT4G00380.1,AT1G15910.1,AT1G80790.1  
AT2G16490.1,AT3G29375.1  
Orysa4|Os03g39940.1  
AT5G56930.1 Orysa4|Os01g39100.1  
AT3G03790.2 Orysa4|Os07g07080.1  
AT5G65540.1 Orysa4|Os03g58780.1  
AT1G55080.1 Orysa4|Os01g31629.1  
AT1G29580.1  
AT5G36160.1 Orysa4|Os02g19970.1,Orysa4|Os06g23684.1,Orysa4|Os02g19924.1,Orysa4|Os02g20360.1  
AT2G24850.1,AT4G28420.2,AT4G28410.1,AT2G20610.1  
AT4G23600.1,AT4G23590.1  
AT5G53970.1  
Orysa4|Os11g35040.1

AT2G36885.1 Orysa4|Os03g04470.1  
AT5G27660.1 Orysa4|Os11g14170.1  
AT3G46780.1 Orysa4|Os05g22614.1  
AT5G49810.1 Orysa4|Os05g01470.1  
AT1G29395.1,AT1G29390.1 Orysa4|Os05g49170.1  
AT2G42700.1 Orysa4|Os11g06810.1  
AT2G23390.1 Orysa4|Os04g36062.1  
AT5G27820.1 Orysa4|Os01g15290.1,Orysa4|Os03g48840.1  
AT3G42860.1 Orysa4|Os03g57260.1  
AT3G02820.1 Orysa4|Os02g52460.1  
AT5G11330.1 Orysa4|Os06g39660.1  
AT3G44330.1 Orysa4|Os08g01180.1  
AT4G20300.2 Orysa4|Os05g48280.1,Orysa4|Os01g48830.1  
AT2G45580.1,AT2G45560.1,AT2G45570.1,AT1G33730.1,AT3G61040.1,AT1G33720.1,AT2G45550.1  
Orysa4|Os03g14560.1,Orysa4|Os08g39730.1,Orysa4|Os09g27500.1,Orysa4|Os12g09500.1,Orysa4|Os10g05490.1,Orysa4|Os03g14400.1  
AT4G13290.1,AT3G48320.1,AT3G48280.1,AT5G24960.1,AT3G48270.1,AT2G30750.1,AT1G11610.1,AT5G42590.1,AT2G30770.1,AT3G48310.1,AT5G24950.1,AT4G13310.1,AT3G48300.1,AT3G48290.1  
Orysa4|Os01g12770.1,Orysa4|Os01g12760.1,Orysa4|Os01g12750.1,Orysa4|Os01g12740.1  
AT3G61880.1,AT2G46660.1,AT1G01190.1 Orysa4|Os08g43390.1,Orysa4|Os09g35940.1  
AT5G09970.1 Orysa4|Os10g26340.1  
AT4G15110.1 Orysa4|Os02g07680.1  
AT5G04660.1,AT3G10570.1,AT3G10560.1,AT5G04630.1 Orysa4|Os04g33370.1  
AT5G25900.1 Orysa4|Os06g37364.1,Orysa4|Os06g37330.1,Orysa4|Os06g37224.1,Orysa4|Os06g37300.1  
AT1G01280.1 Orysa4|Os08g03682.1  
AT1G13710.1,AT1G74110.1 Orysa4|Os07g41240.1,Orysa4|Os03g30420.1  
AT4G39950.1,AT2G22330.1,AT5G05260.1 Orysa4|Os04g08828.1,Orysa4|Os03g37290.1,Orysa4|Os04g08824.1  
AT2G30490.1 Orysa4|Os05g25640.1  
AT3G26160.1,AT1G13110.1,AT3G26290.1,AT3G26150.1,AT3G26200.1,AT2G02580.1,AT3G26300.1,AT3G26330.1,AT5G25120.1,AT3G26190.1,AT3G26210.1,AT5G57260.1,AT5G25130.1,AT1G13080.1,AT3G26320.1,AT2G24180.1,AT3G26170.1,AT5G25180.1,AT3G26310.1,AT3G26180.1,AT3G44250.1,AT5G25140.1  
Orysa4|Os03g63310.1,Orysa4|Os12g32850.1  
AT2G12190.1,AT1G64950.1,AT1G64930.1,AT1G64940.1,AT1G64900.1,AT3G03470.1,AT5G61320.1  
Orysa4|Os10g37100.1,Orysa4|Os10g36960.1,Orysa4|Os10g37020.1,Orysa4|Os10g37070.1,Orysa4|Os10g05020.1,Orysa4|Os10g37120.1,Orysa4|Os10g37050.1,Orysa4|Os10g37110.1,Orysa4|Os10g37160.1  
AT2G26170.1 Orysa4|Os01g50590.1  
AT3G28740.1,AT2G23190.1,AT2G23220.1,AT4G37330.1,AT5G57220.1,AT5G36220.1,AT4G37410.1,AT1G66540.1,AT4G37340.1,AT4G37430.1,AT4G37370.1,AT4G37400.1,AT5G67310.1,AT4G37320.1,AT4G37310.1,AT4G37360.1  
Orysa4|Os12g39240.1,Orysa4|Os03g55240.1,Orysa4|Os12g39300.1  
AT5G06900.1 Orysa4|Os06g41070.1,Orysa4|Os04g01140.1,Orysa4|Os06g01250.1  
AT5G44620.1,AT4G12330.1,AT4G12310.1,AT4G12320.1,AT4G12300.1,AT4G22710.1,AT4G22690.1  
Orysa4|Os08g43440.1,Orysa4|Os01g50490.1  
AT1G11600.1 Orysa4|Os06g46680.1  
AT5G04330.1,AT4G36220.1 Orysa4|Os03g02180.1,Orysa4|Os10g36848.1  
AT1G31800.1 Orysa4|Os02g57290.1  
AT5G07990.1 Orysa4|Os10g17260.1,Orysa4|Os10g16974.1  
AT2G40890.1 Orysa4|Os05g41440.1  
AT3G52970.1  
AT4G20235.1,AT4G20240.1  
AT1G16400.1,AT1G16410.1,AT1G58260.1,AT1G79370.1  
AT1G58265.1  
AT5G35917.1  
AT3G53300.1,AT3G26280.1,AT3G53290.1,AT3G26270.1,AT3G26230.1,AT1G13090.1,AT3G26830.1,AT3G53280.1,AT3G26220.1,AT1G13100.1,AT5G35715.1  
AT4G13770.1  
AT5G10600.1  
AT2G27010.1,AT4G15360.1,AT5G42580.1,AT3G20140.1,AT3G20940.1,AT3G20130.1,AT3G20100.1,AT3G32047.1,AT3G20090.1,AT2G42250.1,AT2G14100.1,AT3G20960.1,AT1G50520.1,AT1G50560.1,AT4G15380.1,AT1G28430.1,AT3G20950.1,AT3G20110.1,AT4G15330.1,AT2G05180.1,AT3G20080.1,AT3G20120.1,AT4G15350.1,AT2G27000.1,AT5G47990.1  
AT5G06905.1  
AT1G74550.1,AT1G74540.1  
Orysa4|Os08g36310.1,Orysa4|Os09g27510.1,Orysa4|Os06g39780.1,Orysa4|Os02g36280.1,Orysa4|Os12g09790.1,Orysa4|Os02g36030.1,Orysa4|Os02g36110.1,Orysa4|Os01g38110.1,Orysa4|Os02g36070.1,Orysa4|Os08g39660.1,Orysa4|Os08g39694.1  
Orysa4|Os10g09090.1,Orysa4|Os06g19070.1,Orysa4|Os10g10720.1,Orysa4|Os02g29720.1  
Orysa4|Os10g09100.1,Orysa4|Os10g08230.1,Orysa4|Os10g09110.1,Orysa4|Os10g08540.1  
Orysa4|Os08g39640.1  
Orysa4|Os10g21050.1  
Orysa4|Os04g40460.1,Orysa4|Os06g43520.1,Orysa4|Os04g40470.1  
Orysa4|Os06g43470.1,Orysa4|Os03g39760.1,Orysa4|Os02g09270.1,Orysa4|Os06g43410.1,Orysa4|Os06g43350.1,Orysa4|Os02g38930.1,Orysa4|Os02g09390.1,Orysa4|Os06g30500.1,Orysa4|Os01g72740.1,Orysa4|Os06g43510.1,Orysa4|Os02g09410.1,Orysa4|Os06g43320.1,Orysa4|Os06g43304.1,Orysa4|Os03g39690.1  
Orysa4|Os08g01510.1,Orysa4|Os08g01450.1,Orysa4|Os11g27730.1,Orysa4|Os06g22020.1,Orysa4|Os08g01480.1,Orysa4|Os08g01520.1,Orysa4|Os05g35010.1  
Orysa4|Os06g15680.1,Orysa4|Os05g43910.1  
Orysa4|Os03g53060.1,Orysa4|Os02g12530.1  
Orysa4|Os01g36350.1  
Orysa4|Os02g09310.1  
Orysa4|Os06g35620.1  
Orysa4|Os06g34990.1  
Orysa4|Os03g04190.1

Orysa4|Os01g65750.1  
Orysa4|Os11g29720.1  
Orysa4|Os03g40610.1  
Orysa4|Os03g40600.1  
Orysa4|Os04g09430.1  
Orysa4|Os04g08836.1  
Orysa4|Os02g26770.1,Orysa4|Os02g26810.1  
Orysa4|Os01g72760.1,Orysa4|Os06g43490.1,Orysa4|Os06g30179.1,Orysa4|Os01g27890.1,Orysa4|Os12  
g44290.1,Orysa4|Os02g09400.1,Orysa4|Os02g36190.1,Orysa4|Os02g12550.1,Orysa4|Os02g09240.1,Orysa4|Os06g  
43420.1,Orysa4|Os11g41710.1,Orysa4|Os10g09160.1,Orysa4|Os10g30380.1,Orysa4|Os04g10160.1,Orysa4|Os02g0  
9290.1,Orysa4|Os10g30410.1,Orysa4|Os02g17760.1,Orysa4|Os06g43384.1,Orysa4|Os02g32770.1,Orysa4|Os02g09  
200.1,Orysa4|Os10g30390.1,Orysa4|Os09g10340.1,Orysa4|Os07g11970.1,Orysa4|Os03g39650.1,Orysa4|Os04g099  
20.1,Orysa4|Os07g11739.1,Orysa4|Os02g38940.1,Orysa4|Os06g43480.1,Orysa4|Os02g36150.1,Orysa4|Os08g0149  
0.1,Orysa4|Os07g11890.1,Orysa4|Os02g12540.1,Orysa4|Os06g45960.1  
Orysa4|Os11g28060.1,Orysa4|Os01g36294.1  
Orysa4|Os05g29750.1  
Orysa4|Os06g43440.1,Orysa4|Os07g19210.1  
Orysa4|Os07g19130.1,Orysa4|Os03g37080.1  
Orysa4|Os02g09260.1  
Orysa4|Os02g09330.1,Orysa4|Os12g16720.1,Orysa4|Os01g72730.1,Orysa4|Os03g39540.1,Orysa4|Os09  
g36080.1  
Orysa4|Os07g19150.1  
Orysa4|Os03g37070.1  
Orysa4|Os06g22340.1,Orysa4|Os01g24810.1,Orysa4|Os08g05610.1,Orysa4|Os08g05620.1  
Orysa4|Os07g26870.1  
Orysa4|Os06g42610.1,Orysa4|Os10g37034.1  
Orysa4|Os04g03870.1,Orysa4|Os10g36740.1,Orysa4|Os02g01890.1,Orysa4|Os04g03890.1  
Orysa4|Os02g12890.1,Orysa4|Os06g36920.1  
Orysa4|Os01g50530.1,Orysa4|Os01g50580.1  
Orysa4|Os02g30090.1,Orysa4|Os03g55260.1,Orysa4|Os02g30110.1,Orysa4|Os02g30080.1,Orysa4|Os04  
g18380.1,Orysa4|Os02g30100.1  
Orysa4|Os03g55230.1,Orysa4|Os03g55250.1  
Orysa4|Os12g39310.1  
Orysa4|Os04g45630.1,Orysa4|Os06g24180.1  
Orysa4|Os09g26940.1,Orysa4|Os03g44740.1,Orysa4|Os09g26980.1,Orysa4|Os09g08990.1,Orysa4|Os02  
g29960.1,Orysa4|Os08g35510.1,Orysa4|Os09g26960.1  
Orysa4|Os09g26950.1  
Orysa4|Os06g10260.1  
Orysa4|Os03g25150.1  
Orysa4|Os10g12080.1  
Orysa4|Os10g12050.1  
AT1G24625.1,AT1G80730.1,AT1G66140.1 Orysa4|Os03g13600.1  
AT5G57520.1 Orysa4|Os08g44190.1,Orysa4|Os09g38610.1,Orysa4|Os02g08510.1  
AT5G48890.1  
Orysa4|Os07g40300.1,Orysa4|Os03g41110.1,Orysa4|Os12g39220.1  
Orysa4|Os09g26200.1,Orysa4|Os09g26210.1,Orysa4|Os09g26050.1  
AT1G73350.1 Orysa4|Os02g42540.1  
AT2G32980.1 Orysa4|Os08g10410.1  
AT1G58220.1 Orysa4|Os02g34630.1  
AT1G09710.1  
AT2G27350.3 Orysa4|Os04g33780.1  
AT1G21740.1,AT1G77500.1 Orysa4|Os05g35070.1  
AT2G17110.1,AT4G35240.1 Orysa4|Os09g37520.1,Orysa4|Os08g43730.1  
AT5G54480.1  
AT1G20530.1  
Orysa4|Os01g72970.1  
Orysa4|Os02g44900.1,Orysa4|Os04g47480.1  
AT5G49010.1 Orysa4|Os05g05150.1  
AT1G67060.1 Orysa4|Os02g12870.1  
AT2G22140.1,AT2G21800.1 Orysa4|Os04g55500.1  
AT2G31340.1 Orysa4|Os09g12500.1  
AT4G06634.1 Orysa4|Os05g01550.1  
Orysa4|Os02g34680.1  
AT4G32810.1 Orysa4|Os01g38580.1  
AT1G72390.1 Orysa4|Os10g25200.1  
AT1G72380.1  
AT1G69320.1,AT1G26600.1 Orysa4|Os05g43660.1,Orysa4|Os01g55850.1  
AT3G18730.1 Orysa4|Os02g54170.1  
Orysa4|Os02g54290.1  
AT5G63080.1 Orysa4|Os01g36630.1  
AT3G17680.1,AT1G48405.1 Orysa4|Os03g01980.1  
AT2G03140.1 Orysa4|Os09g26570.1  
AT5G38510.1 Orysa4|Os02g22100.1  
AT2G16030.1,AT4G26730.1 Orysa4|Os01g57620.1  
AT1G24480.1,AT4G24805.1 Orysa4|Os08g02600.1  
AT5G41190.1 Orysa4|Os02g02360.1  
AT3G58110.1,AT2G42370.1 Orysa4|Os06g34710.1  
AT3G17170.1 Orysa4|Os12g37610.1  
AT5G22090.1 Orysa4|Os03g15530.1,Orysa4|Os03g49830.1  
AT2G21350.1,AT4G39040.1 Orysa4|Os10g36860.1  
AT5G49110.1 Orysa4|Os03g22190.1  
Orysa4|Os05g25040.1

AT3G24740.1 Orysa4|Os04g04010.1  
AT4G31410.1 Orysa4|Os06g47860.1,Orysa4|Os02g05710.1  
AT3G25910.1  
Orysa4|Os07g23790.1  
Orysa4|Os01g42700.1  
AT3G62190.1 Orysa4|Os07g44310.1  
AT4G07990.1 Orysa4|Os03g51830.1  
Orysa4|Os07g03270.1  
AT1G21830.1 Orysa4|Os04g59420.1  
AT2G17900.1 Orysa4|Os03g49730.1  
AT2G26190.1,AT5G57010.1,AT4G33050.2 Orysa4|Os01g38980.1  
AT3G52870.1 Orysa4|Os11g05340.1,Orysa4|Os12g05420.1  
AT3G13600.1 Orysa4|Os03g25760.1,Orysa4|Os07g43970.1,Orysa4|Os10g27170.1  
AT3G58480.1  
Orysa4|Os05g10840.1  
Orysa4|Os03g07110.1  
AT1G04130.1 Orysa4|Os03g53910.1  
AT5G46850.1 Orysa4|Os12g40500.1  
AT3G61200.1 Orysa4|Os07g27870.1,Orysa4|Os07g27960.1  
AT5G57460.1 Orysa4|Os08g14620.1  
AT5G51020.1 Orysa4|Os11g32160.1  
AT2G42975.1 Orysa4|Os01g47630.1  
AT1G06923.1,AT2G30395.1 Orysa4|Os05g26210.1,Orysa4|Os07g48140.1  
AT5G57440.1,AT4G25840.1 Orysa4|Os08g14580.1  
AT4G38810.2 Orysa4|Os10g09850.1,Orysa4|Os03g14590.1  
AT1G63310.1 Orysa4|Os04g01500.1  
AT5G43650.1 Orysa4|Os03g53020.1  
AT5G18920.1 Orysa4|Os05g33514.1  
AT3G52860.1 Orysa4|Os05g06290.1  
AT1G29980.1,AT2G34510.1 Orysa4|Os01g55190.1  
AT3G08030.1,AT2G41800.1,AT2G41810.1 Orysa4|Os03g59300.1,Orysa4|Os07g10620.1  
AT4G32460.1,AT5G25460.1,AT5G11420.1 Orysa4|Os01g42520.1,Orysa4|Os04g41740.1,Orysa4|Os04g41750.1  
AT5G14150.1  
AT1G80240.1  
Orysa4|Os04g41710.1  
Orysa4|Os03g21130.1,Orysa4|Os04g41770.1,Orysa4|Os02g11040.1  
Orysa4|Os02g32600.1  
AT1G78930.1 Orysa4|Os09g38720.1  
Orysa4|Os10g36750.1  
AT2G21710.1 Orysa4|Os07g04230.1  
AT1G10780.1 Orysa4|Os08g36570.1,Orysa4|Os09g28120.1  
AT1G67190.1 Orysa4|Os01g64030.1  
AT2G42780.1 Orysa4|Os08g07280.1  
AT2G28490.1 Orysa4|Os03g21790.1  
AT2G05170.1 Orysa4|Os04g31390.1  
AT5G15630.1 Orysa4|Os03g30250.1  
AT5G60920.1,AT3G02210.1 Orysa4|Os03g30260.1,Orysa4|Os05g32110.1,Orysa4|Os07g41310.1  
AT3G29810.1  
AT5G60950.1  
AT1G09790.1  
Orysa4|Os03g54750.1  
AT4G12830.1 Orysa4|Os01g69060.1  
AT5G50310.1 Orysa4|Os04g40740.1  
AT2G39580.1 Orysa4|Os12g37890.1  
AT3G27180.1 Orysa4|Os01g69120.1  
AT1G11320.1 Orysa4|Os06g50850.1  
Orysa4|Os04g33620.1,Orysa4|Os10g30210.1  
AT3G19540.1,AT1G49840.1 Orysa4|Os12g39160.1,Orysa4|Os07g40150.1,Orysa4|Os03g40930.1  
AT3G55720.1,AT5G05840.1 Orysa4|Os03g16060.1  
AT1G27690.1  
AT5G06610.1  
AT1G79420.1  
AT5G66740.1,AT1G75160.1  
Orysa4|Os01g01500.1  
Orysa4|Os10g27110.1  
Orysa4|Os05g16300.1  
AT5G43310.1 Orysa4|Os03g64320.1,Orysa4|Os07g26440.1  
AT2G34820.1,AT1G30670.1 Orysa4|Os12g31430.1  
AT2G32090.1 Orysa4|Os03g45720.1  
AT2G38780.1 Orysa4|Os05g31680.1  
AT3G10970.1 Orysa4|Os05g07632.1  
AT2G32900.1 Orysa4|Os11g34310.1  
AT5G56900.2 Orysa4|Os09g19940.1  
AT1G80710.1 Orysa4|Os08g18150.1,Orysa4|Os08g18880.1  
AT3G10530.1 Orysa4|Os01g08770.1  
AT5G19950.1 Orysa4|Os01g08280.1  
AT5G50760.1 Orysa4|Os09g32984.1,Orysa4|Os02g30810.1,Orysa4|Os01g70050.1  
AT1G19840.1,AT1G75590.1,AT4G34750.1,AT5G10990.1 Orysa4|Os04g56690.1,Orysa4|Os04g56680.1  
AT1G56150.1,AT1G79130.1,AT3G12830.1,AT1G16510.1  
Orysa4|Os04g52670.1,Orysa4|Os12g43110.1,Orysa4|Os06g45950.1,Orysa4|Os03g45800.1,Orysa4|Os02  
g07110.1  
AT3G20220.1 Orysa4|Os06g48860.1,Orysa4|Os02g05060.1,Orysa4|Os02g05050.1

AT4G36110.1,AT4G34790.1,AT3G03840.1,AT2G21210.1,AT5G18060.1,AT5G18030.1,AT5G18080.1,AT4G34770.1,AT4G34780.1,AT1G75580.1,AT5G18020.1,AT4G38840.1,AT4G34800.1,AT4G13790.1,AT5G18050.1,AT3G03830.1,AT4G38850.1,AT5G18010.1,AT3G03850.1,AT4G34810.1,AT4G34760.1,AT2G21200.1,AT3G03820.1,AT4G38860.1  
Orysa4|Os08g02530.1,Orysa4|Os08g02520.1  
AT2G24400.1,AT4G31320.1 Orysa4|Os04g51890.1  
AT5G20810.2,AT3G43120.1 Orysa4|Os09g26610.1  
AT3G60690.1,AT2G45210.1,AT4G22620.1,AT4G12410.1 Orysa4|Os02g42990.1  
AT3G61900.1,AT2G46690.1,AT5G53590.1,AT4G00880.1 Orysa4|Os06g50040.1  
AT5G03310.1,AT3G53250.1,AT2G37030.1 Orysa4|Os04g43740.1  
AT2G36210.1  
AT2G28085.1  
Orysa4|Os08g42277.1,Orysa4|Os08g42198.1  
Orysa4|Os06g45970.1  
Orysa4|Os02g24740.1  
Orysa4|Os02g24700.1  
Orysa4|Os06g04590.1  
Orysa4|Os06g48850.1  
Orysa4|Os02g52990.1  
AT1G72830.2,AT1G17590.1,AT3G14020.1,AT1G54160.1  
Orysa4|Os03g07880.1,Orysa4|Os03g29760.1,Orysa4|Os07g41720.1,Orysa4|Os02g53620.1  
AT2G34720.1,AT1G30500.2 Orysa4|Os12g41880.1  
AT3G05690.1,AT5G06510.1 Orysa4|Os07g06470.1,Orysa4|Os12g42400.1  
Orysa4|Os10g25850.1  
AT2G40780.1 Orysa4|Os03g02310.1  
AT5G44710.1 Orysa4|Os05g05560.1  
AT5G27680.1 Orysa4|Os05g05810.1  
AT5G04750.1 Orysa4|Os02g33070.1  
Orysa4|Os08g44460.1  
AT5G40190.1,AT3G28140.1 Orysa4|Os09g20860.1  
AT2G36990.1 Orysa4|Os08g14450.1  
AT1G64860.1 Orysa4|Os08g06630.1  
AT3G53920.1 Orysa4|Os05g51150.1  
AT1G08540.1 Orysa4|Os11g26160.1  
AT5G13730.1  
AT1G55370.2 Orysa4|Os03g53710.1  
AT1G03250.1 Orysa4|Os12g05000.1,Orysa4|Os11g04990.1  
AT4G33470.1 Orysa4|Os12g08220.1  
AT4G02560.1 Orysa4|Os01g70810.1  
AT1G67210.1,AT5G38600.1 Orysa4|Os06g30020.1  
AT5G65780.1,AT3G49680.1 Orysa4|Os10g40200.1,Orysa4|Os05g48450.1,Orysa4|Os03g01600.1  
AT3G19710.1,AT1G10060.2  
Orysa4|Os03g12890.1  
Orysa4|Os04g47190.1  
AT1G15720.1,AT5G58340.1,AT1G06910.1 Orysa4|Os07g49530.1  
AT5G63000.1 Orysa4|Os01g16510.1  
AT5G19660.1 Orysa4|Os06g06810.1  
AT1G53860.1 Orysa4|Os11g40210.1  
AT1G30320.1 Orysa4|Os04g52920.1  
AT2G02170.1 Orysa4|Os02g02500.1  
AT1G67590.1  
Orysa4|Os12g41940.1  
Orysa4|Os03g02840.1  
AT1G28070.1,AT2G33510.1 Orysa4|Os02g31140.1  
AT2G40170.1 Orysa4|Os05g28210.1  
AT3G51810.1  
AT3G54050.1 Orysa4|Os03g16050.1  
AT1G43670.1 Orysa4|Os01g64660.1,Orysa4|Os05g36270.1  
AT5G64380.1 Orysa4|Os06g45370.1  
AT5G01300.1 Orysa4|Os05g39250.1  
AT3G16990.1 Orysa4|Os03g19390.1  
AT5G49230.1,AT3G05700.1,AT3G06760.1,AT1G56280.1,AT5G26990.1  
Orysa4|Os01g48190.1,Orysa4|Os02g20170.1,Orysa4|Os05g48800.1  
AT4G02200.1,AT1G02750.1  
Orysa4|Os05g01730.1,Orysa4|Os01g73960.1  
Orysa4|Os12g36900.1  
AT3G62630.1 Orysa4|Os03g19090.1,Orysa4|Os11g44920.1  
AT2G31740.1 Orysa4|Os04g31000.1  
AT4G34360.1 Orysa4|Os11g35340.1  
AT5G11640.1 Orysa4|Os01g10340.1  
AT3G13990.1 Orysa4|Os06g10430.1  
Orysa4|Os03g29750.1  
AT1G19025.1 Orysa4|Os08g01630.1,Orysa4|Os01g65890.1  
AT1G61690.1 Orysa4|Os03g46710.1  
AT5G24300.1 Orysa4|Os06g06560.1  
AT3G01180.1 Orysa4|Os06g12450.1,Orysa4|Os02g51070.1  
AT1G32900.1 Orysa4|Os07g22930.1  
Orysa4|Os10g30156.1  
Orysa4|Os06g04200.1  
AT1G14620.1 Orysa4|Os06g19640.1  
AT3G09470.1 Orysa4|Os12g37920.1,Orysa4|Os12g37939.1  
AT5G24120.1 Orysa4|Os05g50930.1  
AT4G21215.2 Orysa4|Os01g57740.1,Orysa4|Os07g34650.1



AT3G48500.1 Orysa4|Os01g67570.1  
AT5G57700.1 Orysa4|Os07g33220.1  
AT1G75340.1 Orysa4|Os06g49080.1  
AT1G33265.1 Orysa4|Os04g48840.1  
AT3G54970.1 Orysa4|Os02g15360.1  
AT3G18035.1,AT1G48620.1 Orysa4|Os05g51850.1  
AT1G48610.1  
AT2G07360.1 Orysa4|Os03g15900.1  
AT5G45760.1 Orysa4|Os01g10790.1  
AT4G20930.1 Orysa4|Os06g46372.1  
AT1G51160.1 Orysa4|Os01g33020.1  
AT1G64080.1 Orysa4|Os01g12640.1  
AT5G28960.1,AT5G28910.2 Orysa4|Os02g56500.1  
AT1G58070.1 Orysa4|Os11g09040.1,Orysa4|Os12g08160.1  
AT5G52230.1 Orysa4|Os04g52380.1,Orysa4|Os08g10580.1  
AT1G80090.1,AT1G15330.1 Orysa4|Os02g06410.1  
AT1G68185.1 Orysa4|Os01g42250.1  
AT5G57510.1 Orysa4|Os08g34800.1  
AT4G03030.1 Orysa4|Os02g21110.1  
AT5G25770.2 Orysa4|Os06g06770.1  
AT4G39880.1 Orysa4|Os07g23244.1  
AT1G77320.1 Orysa4|Os11g08660.1  
AT3G05250.1 Orysa4|Os03g59540.1  
AT4G37020.1 Orysa4|Os10g25000.1  
AT5G50870.1 Orysa4|Os01g70140.1  
AT5G59300.1,AT1G36340.1,AT3G24515.1,AT2G32790.1,AT5G41340.1,AT2G18600.1,AT5G62540.1,AT1G78870.1,AT1G14400.1,AT5G05080.1,AT4G27960.2,AT1G63800.1,AT5G56150.1,AT3G57870.1,AT3G55380.1,AT3G08690.1,AT1G64230.1,AT2G46030.1,AT3G46460.1,AT2G02760.1,AT5G53300.1,AT2G16740.1,AT5G25760.1,AT3G08700.1,AT3G13550.1,AT1G16890.2,AT3G20060.1,AT5G41700.4,AT1G50490.1  
Orysa4|Os09g15320.1,Orysa4|Os02g02830.1,Orysa4|Os06g45000.1,Orysa4|Os06g30970.1,Orysa4|Os09g12230.1,Orysa4|Os01g62244.1,Orysa4|Os02g16040.1,Orysa4|Os02g48950.1,Orysa4|Os02g48910.1,Orysa4|Os01g42040.1,Orysa4|Os02g42314.1,Orysa4|Os03g57790.1,Orysa4|Os01g16650.1,Orysa4|Os10g31000.1,Orysa4|Os01g60410.1,Orysa4|Os01g60360.1,Orysa4|Os07g38940.1,Orysa4|Os04g49130.1,Orysa4|Os10g11260.1,Orysa4|Os10g39120.1,Orysa4|Os05g08960.1,Orysa4|Os03g03130.1,Orysa4|Os05g38550.1,Orysa4|Os07g07240.1,Orysa4|Os01g46926.1,Orysa4|Os08g28680.1,Orysa4|Os01g48280.1,Orysa4|Os04g57220.1  
AT4G36800.1  
Orysa4|Os01g46920.1  
Orysa4|Os02g48920.1  
AT3G13530.1,AT3G07980.1 Orysa4|Os04g56530.1  
AT2G17350.1 Orysa4|Os08g40100.1  
AT1G27290.1 Orysa4|Os09g32960.1  
Orysa4|Os01g69870.1  
AT5G18260.1 Orysa4|Os10g26610.1,Orysa4|Os03g20980.1  
AT5G24740.1 Orysa4|Os08g02350.1  
AT3G10150.1 Orysa4|Os01g71420.1  
AT3G08880.1,AT5G01570.1 Orysa4|Os04g36780.1  
AT2G17270.1 Orysa4|Os09g38100.1  
AT5G14040.1 Orysa4|Os02g52860.1,Orysa4|Os06g10810.1,Orysa4|Os04g37600.1  
AT3G48850.1  
Orysa4|Os03g15690.1  
AT3G14760.1 Orysa4|Os02g21640.1,Orysa4|Os02g21530.1  
AT4G29735.1 Orysa4|Os06g37070.1  
AT2G39950.1 Orysa4|Os07g01060.1  
AT4G39300.1 Orysa4|Os01g37090.1  
Orysa4|Os02g17370.1  
AT5G56780.1 Orysa4|Os07g39800.1  
AT4G26170.1  
AT5G56770.1  
AT1G70750.1,AT5G16720.1  
Orysa4|Os03g15410.1,Orysa4|Os03g50100.1,Orysa4|Os03g58490.1,Orysa4|Os01g56790.1  
AT1G18265.1 Orysa4|Os04g38920.1  
AT2G30690.1  
AT4G13630.1,AT4G13160.1,AT1G04890.1  
AT1G08800.1  
Orysa4|Os08g16790.1  
Orysa4|Os12g29740.1  
AT5G05200.1 Orysa4|Os07g12530.1  
AT3G58770.1 Orysa4|Os01g10540.1,Orysa4|Os05g44190.1,Orysa4|Os01g10520.1,Orysa4|Os05g11428.1  
AT5G54540.1 Orysa4|Os03g10390.1,Orysa4|Os08g08190.1  
AT2G31190.1 Orysa4|Os04g43690.1  
AT1G76660.1 Orysa4|Os03g16400.1,Orysa4|Os01g01390.1  
AT3G57050.1 Orysa4|Os06g07960.1,Orysa4|Os06g07860.1  
AT3G01120.1 Orysa4|Os03g25940.1  
AT1G33320.1  
Orysa4|Os10g25950.1,Orysa4|Os10g25930.1,Orysa4|Os10g26010.1,Orysa4|Os06g13450.1  
Orysa4|Os10g25940.1  
AT2G22880.1,AT4G37710.1 Orysa4|Os03g47280.1  
AT2G43060.1 Orysa4|Os04g56500.1  
Orysa4|Os05g06520.1  
AT2G41750.1 Orysa4|Os12g04860.1  
AT2G43990.1 Orysa4|Os11g14240.1  
AT1G13450.1,AT3G25990.1 Orysa4|Os04g40930.1

AT3G26740.1 Orysa4|Os01g01340.1  
AT4G34590.1,AT1G75390.1,AT2G18160.1 Orysa4|Os09g13570.1,Orysa4|Os02g03960.1  
AT3G62420.1 Orysa4|Os12g37410.1,Orysa4|Os05g03860.1  
Orysa4|Os01g36220.1,Orysa4|Os01g36130.1  
Orysa4|Os03g19370.1  
AT1G47570.1 Orysa4|Os11g07450.1  
Orysa4|Os08g02950.1  
AT5G51140.1 Orysa4|Os02g30840.1  
AT2G16070.2 Orysa4|Os07g03130.1  
AT5G53280.1 Orysa4|Os06g30930.1,Orysa4|Os02g16450.1  
AT3G04950.1 Orysa4|Os06g19480.1  
AT5G22875.1 Orysa4|Os04g08330.1  
AT2G16430.2 Orysa4|Os01g56880.1  
AT5G34850.1 Orysa4|Os06g43640.1  
AT2G27190.1  
AT1G56360.1,AT4G36350.1,AT1G52940.1,AT2G18130.1  
AT3G46120.1  
Orysa4|Os12g44030.1,Orysa4|Os12g44010.1  
Orysa4|Os12g44050.1  
AT4G33640.1 Orysa4|Os03g48390.1  
AT3G59660.1 Orysa4|Os09g34130.1  
Orysa4|Os02g39280.1  
AT2G45260.1,AT4G34080.1 Orysa4|Os10g23220.1  
AT1G53380.1,AT3G14870.1,AT1G29300.1 Orysa4|Os01g10680.1,Orysa4|Os05g11650.1  
AT3G60680.1 Orysa4|Os10g36400.1  
AT2G30380.1  
AT4G36100.1,AT4G33320.1  
AT2G32130.1  
Orysa4|Os01g60850.1  
Orysa4|Os11g14490.1  
AT4G17000.1 Orysa4|Os03g56070.1  
AT2G26230.1 Orysa4|Os01g64520.1  
AT4G26965.1 Orysa4|Os09g32430.1,Orysa4|Os05g46140.1  
AT5G24460.1 Orysa4|Os06g49780.1  
AT5G46560.1 Orysa4|Os03g01016.2  
AT5G42670.1,AT5G52070.1 Orysa4|Os05g04860.1  
AT1G44960.1 Orysa4|Os11g33100.1  
AT1G14710.1 Orysa4|Os03g13560.1,Orysa4|Os10g02760.1  
AT5G53330.1 Orysa4|Os06g06530.1  
AT5G21430.1 Orysa4|Os12g31460.1  
AT5G18440.1 Orysa4|Os01g59860.1  
AT4G01897.1 Orysa4|Os03g36630.1  
AT3G60660.1 Orysa4|Os07g30110.1  
AT1G21600.1 Orysa4|Os12g01950.1,Orysa4|Os11g01890.1  
AT1G06760.1,AT2G30620.1 Orysa4|Os03g58470.1,Orysa4|Os07g08710.1  
Orysa4|Os06g04020.1,Orysa4|Os04g18090.1  
AT3G13940.1 Orysa4|Os11g40090.1  
AT4G16444.1 Orysa4|Os06g09840.1  
AT3G18760.1 Orysa4|Os01g12090.1  
AT3G10572.1 Orysa4|Os06g48970.1  
AT5G05510.1 Orysa4|Os12g03180.1,Orysa4|Os11g03460.1  
AT5G63780.1,AT5G08750.1 Orysa4|Os04g59580.1  
AT1G32460.1 Orysa4|Os02g46480.1  
AT3G21810.1 Orysa4|Os02g06584.1  
Orysa4|Os06g46890.1  
AT5G64830.1 Orysa4|Os04g54820.1  
AT2G19260.1 Orysa4|Os04g34720.1  
AT5G58450.1 Orysa4|Os05g27870.1  
AT4G14180.1 Orysa4|Os04g28020.1  
AT3G16565.1 Orysa4|Os01g03030.1  
AT3G19210.1 Orysa4|Os02g52510.1  
AT3G12810.1 Orysa4|Os02g46450.1  
AT2G18760.1 Orysa4|Os01g01312.1  
AT2G25170.1,AT4G31900.1 Orysa4|Os06g08480.1  
AT3G54280.1 Orysa4|Os02g06592.1  
AT1G08600.1 Orysa4|Os10g31970.1  
AT2G13370.1 Orysa4|Os07g46590.1  
AT2G02090.1 Orysa4|Os04g47830.1  
AT3G06010.1,AT5G19310.1 Orysa4|Os05g05230.1  
AT5G66750.1 Orysa4|Os03g51230.1,Orysa4|Os09g27060.1  
AT5G63950.1,AT5G07810.1,AT2G44980.2,AT2G46020.2,AT3G06400.1,AT5G18620.2,AT5G44800.1,AT1G48310.1,A  
T3G57300.1,AT1G03750.1  
Orysa4|Os01g65850.1,Orysa4|Os03g01200.1,Orysa4|Os07g31450.1,Orysa4|Os05g15890.1,Orysa4|Os02  
g02290.1,Orysa4|Os04g59620.1,Orysa4|Os01g27040.1,Orysa4|Os03g22900.1,Orysa4|Os07g44210.1,Orysa4|Os05  
05780.1,Orysa4|Os01g26872.1,Orysa4|Os01g44990.1  
Orysa4|Os02g06588.1  
Orysa4|Os02g57200.1  
Orysa4|Os07g40730.1  
AT1G21870.1,AT1G77610.1 Orysa4|Os08g01410.1,Orysa4|Os04g59550.1  
AT3G01380.1 Orysa4|Os02g37050.1  
AT2G37100.1,AT5G03110.1 Orysa4|Os05g03440.1  
AT2G02950.1,AT1G14280.1,AT1G18810.1 Orysa4|Os10g26670.1

AT1G12800.1 Orysa4|Os02g02390.1  
AT1G65320.1 Orysa4|Os01g69090.1  
Orysa4|Os08g41740.1  
AT1G79790.1 Orysa4|Os11g19460.1  
AT3G03140.1 Orysa4|Os02g47170.1  
AT4G30210.1 Orysa4|Os08g14570.1,Orysa4|Os04g55960.1,Orysa4|Os09g38620.1  
AT3G02280.1 Orysa4|Os01g53250.1  
AT4G24520.1  
AT3G24710.1  
AT3G06460.1,AT3G06470.1 Orysa4|Os03g49480.1  
AT3G17930.1 Orysa4|Os01g59080.1  
AT4G04190.1 Orysa4|Os04g33510.1  
Orysa4|Os01g09500.1  
AT1G10830.1 Orysa4|Os12g21710.1  
AT5G37630.1 Orysa4|Os06g14460.1  
AT3G26730.1 Orysa4|Os02g31150.1  
AT3G18270.1 Orysa4|Os01g04630.1  
AT3G50910.1,AT5G66480.1 Orysa4|Os02g47580.1  
AT4G11720.1 Orysa4|Os09g35720.1,Orysa4|Os05g18730.1  
AT4G28510.1,AT1G03860.1,AT2G20530.1 Orysa4|Os03g62490.1,Orysa4|Os07g15880.1  
AT3G27280.1,AT5G40770.1 Orysa4|Os04g38900.1,Orysa4|Os02g37000.1  
AT5G44140.1  
AT5G14300.1  
Orysa4|Os03g60000.1  
Orysa4|Os03g59840.1  
AT5G13520.1 Orysa4|Os03g60460.1  
AT2G22260.1 Orysa4|Os06g17830.1  
AT4G26990.1,AT5G54920.1 Orysa4|Os04g53450.1  
AT1G14345.1 Orysa4|Os03g07440.1  
AT1G44414.1 Orysa4|Os05g35970.1  
AT1G19010.1 Orysa4|Os02g37020.1  
AT1G74860.1  
AT2G42270.1,AT1G20960.1,AT5G61140.1 Orysa4|Os03g11470.1  
AT3G27730.1 Orysa4|Os02g40450.1  
Orysa4|Os02g01880.1  
Orysa4|Os03g53220.1  
AT5G57880.1 Orysa4|Os08g44180.1  
AT2G26780.1 Orysa4|Os11g04220.1  
AT3G52260.2 Orysa4|Os03g17920.1  
AT2G40316.1 Orysa4|Os03g18540.1  
AT4G04930.1 Orysa4|Os02g42660.1  
AT1G27150.1,AT1G27110.1 Orysa4|Os03g48380.1  
AT5G60150.1 Orysa4|Os12g01220.1,Orysa4|Os11g01220.1  
AT2G26210.1 Orysa4|Os07g42640.1  
AT4G25610.1 Orysa4|Os09g39660.1  
AT2G24150.1,AT4G30850.1 Orysa4|Os06g44250.1  
AT5G20270.1 Orysa4|Os06g43620.1  
Orysa4|Os06g47060.1  
Orysa4|Os02g08320.1  
AT1G69430.1,AT1G26650.1 Orysa4|Os07g40470.1  
AT4G33480.1 Orysa4|Os04g59570.1  
AT3G60590.3 Orysa4|Os04g45200.1  
AT3G51580.1 Orysa4|Os05g40040.1  
AT2G14260.1 Orysa4|Os05g43830.1  
AT1G54115.1,AT3G14070.1 Orysa4|Os03g08230.1  
AT5G17850.1,AT5G17860.1 Orysa4|Os03g45370.1,Orysa4|Os12g42910.1  
AT1G08960.1  
Orysa4|Os10g30070.1,Orysa4|Os11g01580.1  
Orysa4|Os03g40320.1  
AT4G13200.1 Orysa4|Os04g43350.1  
AT2G40390.1 Orysa4|Os01g07130.1  
AT5G64190.1  
Orysa4|Os07g12800.1  
AT5G08720.1 Orysa4|Os03g62170.1  
AT4G23890.1 Orysa4|Os07g09800.1  
AT1G64340.1,AT5G41810.1 Orysa4|Os06g33390.1  
AT1G70180.2 Orysa4|Os04g39090.1  
AT3G13200.1 Orysa4|Os06g01700.1  
AT3G08510.1,AT3G55940.1 Orysa4|Os12g37560.1,Orysa4|Os07g49330.1,Orysa4|Os03g18010.1  
AT5G58700.1,AT2G40116.1  
AT4G38530.1,AT5G58670.1  
AT3G47290.1,AT3G47220.1  
AT5G58690.1  
Orysa4|Os05g03610.1  
AT3G53670.1,AT2G37480.1 Orysa4|Os01g59900.1  
Orysa4|Os05g02260.1  
AT5G24340.1 Orysa4|Os07g26930.1  
Orysa4|Os07g26920.1  
AT1G44760.1 Orysa4|Os05g35380.1,Orysa4|Os01g65440.1  
AT5G48830.1 Orysa4|Os02g31070.1  
AT1G10520.1 Orysa4|Os06g13020.1  
AT2G26300.1 Orysa4|Os05g26890.1

Orysa4|Os05g27520.1  
AT1G14990.1 Orysa4|Os01g42120.1  
AT4G21250.1,AT1G61740.1,AT4G21260.1,AT1G11540.1 Orysa4|Os01g57700.1,Orysa4|Os01g57710.1  
AT2G25737.1 Orysa4|Os08g29760.1,Orysa4|Os09g17600.1,Orysa4|Os08g30020.1  
AT2G36630.1 Orysa4|Os03g51650.1  
AT1G54470.1  
AT1G03340.1,AT4G02920.2 Orysa4|Os05g05140.1  
AT5G62390.1 Orysa4|Os02g01520.1,Orysa4|Os06g01500.1  
AT2G45520.1 Orysa4|Os06g03090.1,Orysa4|Os06g03920.1  
AT2G32640.1 Orysa4|Os08g32630.1  
AT5G12920.1 Orysa4|Os02g37856.1  
AT3G07060.1 Orysa4|Os08g04120.1  
AT2G04360.1 Orysa4|Os08g25700.1  
AT1G16310.1,AT1G79520.1 Orysa4|Os01g03914.1  
AT3G58060.1 Orysa4|Os02g53490.1,Orysa4|Os03g12530.1  
AT2G39450.1 Orysa4|Os01g62070.1  
Orysa4|Os05g38670.1  
AT5G42146.1 Orysa4|Os03g64100.1  
AT1G08710.1 Orysa4|Os01g59910.1  
AT2G36810.1 Orysa4|Os03g05330.1  
AT5G13950.1 Orysa4|Os07g27760.1  
AT1G64350.1 Orysa4|Os01g43250.1  
AT1G35420.1 Orysa4|Os05g35470.1  
AT5G48930.1 Orysa4|Os02g39850.1,Orysa4|Os04g42250.1  
AT1G27620.1 Orysa4|Os01g01520.1  
AT3G62160.1  
Orysa4|Os05g19910.1,Orysa4|Os06g39390.1,Orysa4|Os01g08380.1,Orysa4|Os01g18744.1,Orysa4|Os01g09010.1,Orysa4|Os06g39470.1,Orysa4|Os05g08640.1,Orysa4|Os05g04584.1  
AT1G28680.1 Orysa4|Os06g06180.1  
AT5G41040.1 Orysa4|Os11g31090.1  
AT1G32910.1,AT5G16410.1,AT1G78990.1 Orysa4|Os04g51980.1,Orysa4|Os04g51990.1  
AT3G03480.1,AT5G17540.1 Orysa4|Os10g35950.1  
AT2G19070.1  
AT5G57840.1  
AT2G40230.1  
AT5G07080.1  
AT5G63560.1,AT3G48720.1  
AT1G03390.1  
AT4G31910.1  
AT1G65450.1  
Orysa4|Os08g43020.1,Orysa4|Os08g43040.1,Orysa4|Os10g23820.1,Orysa4|Os10g23310.1,Orysa4|Os11g42290.1,Orysa4|Os03g08720.1,Orysa4|Os06g08640.1,Orysa4|Os08g10420.1,Orysa4|Os11g42370.1,Orysa4|Os09g25460.1  
Orysa4|Os09g37200.1,Orysa4|Os05g02590.1,Orysa4|Os09g37180.1,Orysa4|Os03g47860.1,Orysa4|Os04g56910.1  
Orysa4|Os10g18430.1  
Orysa4|Os06g08580.1  
Orysa4|Os04g11810.1,Orysa4|Os10g01930.1,Orysa4|Os04g09590.1,Orysa4|Os10g02000.1,Orysa4|Os10g03360.1,Orysa4|Os10g01800.1,Orysa4|Os01g42870.1,Orysa4|Os01g42880.1,Orysa4|Os04g09260.1,Orysa4|Os06g48560.1,Orysa4|Os10g01920.1  
Orysa4|Os07g40880.1  
Orysa4|Os11g40230.1  
Orysa4|Os10g03390.1  
Orysa4|Os04g42830.1,Orysa4|Os05g22300.1,Orysa4|Os03g45740.1,Orysa4|Os07g14080.1,Orysa4|Os05g04930.1,Orysa4|Os05g25150.1,Orysa4|Os05g06380.1,Orysa4|Os06g49660.1,Orysa4|Os10g01720.1,Orysa4|Os07g36560.1  
Orysa4|Os12g27220.1,Orysa4|Os10g01650.1,Orysa4|Os10g01690.1,Orysa4|Os10g01680.1,Orysa4|Os12g27350.1,Orysa4|Os10g04429.1,Orysa4|Os12g27254.1,Orysa4|Os07g23960.1  
Orysa4|Os01g65610.1,Orysa4|Os02g47040.1  
Orysa4|Os10g04400.1  
Orysa4|Os10g01700.1  
Orysa4|Os01g24790.1  
Orysa4|Os12g27330.1  
AT1G73540.1,AT1G18300.1,AT2G01670.1 Orysa4|Os02g50130.1,Orysa4|Os06g14420.1  
AT3G12600.1 Orysa4|Os03g59580.1,Orysa4|Os07g11120.1  
AT1G14860.1  
AT1G35660.1 Orysa4|Os01g65320.1  
AT3G25597.1,AT1G26140.1 Orysa4|Os02g47950.1  
AT1G26470.1 Orysa4|Os05g43680.1  
AT3G05100.1 Orysa4|Os07g47150.1  
AT3G26085.1 Orysa4|Os05g22930.1  
AT4G21140.1,AT4G05400.1 Orysa4|Os01g32790.1  
AT5G10110.1,AT5G65120.1 Orysa4|Os02g51640.1  
AT4G31930.1,AT1G15870.1,AT1G80720.1 Orysa4|Os08g34130.1,Orysa4|Os09g38500.1  
AT5G05990.1 Orysa4|Os01g05010.1,Orysa4|Os01g05050.1  
AT3G55605.1,AT2G39795.1  
AT5G02050.1  
AT2G39790.1  
Orysa4|Os05g38210.1  
Orysa4|Os01g05060.1  
AT5G05240.1 Orysa4|Os02g03940.1  
AT2G40630.1

AT5G16630.1 Orysa4|Os08g33082.1  
 AT5G53650.1 Orysa4|Os05g45910.1  
 Orysa4|Os01g40650.1  
 AT4G35910.1 Orysa4|Os12g39840.1  
 AT3G52040.1 Orysa4|Os01g16550.1  
 AT5G16260.1 Orysa4|Os04g41910.1  
 AT3G29360.1,AT5G39320.1,AT5G15490.1 Orysa4|Os12g25700.1,Orysa4|Os03g55070.1,Orysa4|Os12g25690.1  
 AT1G26570.1  
 AT3G01010.1  
 Orysa4|Os03g40720.1  
 AT3G17740.1 Orysa4|Os02g53270.1  
 AT4G14870.1 Orysa4|Os08g30830.1  
 AT3G51790.1 Orysa4|Os10g39870.1  
 AT2G47760.1 Orysa4|Os01g07720.1  
 AT4G33690.1 Orysa4|Os07g11290.1,Orysa4|Os08g09300.1  
 AT4G11175.1 Orysa4|Os12g33960.1  
 AT1G65000.1 Orysa4|Os03g64060.1  
 AT5G54960.1,AT4G33070.1,AT5G01320.1,AT5G01330.1 Orysa4|Os05g39310.1,Orysa4|Os03g18220.1  
 Orysa4|Os05g39320.1,Orysa4|Os01g06660.1  
 Orysa4|Os07g02030.1,Orysa4|Os11g06520.1,Orysa4|Os10g33980.1,Orysa4|Os09g20530.1,Orysa4|Os07  
 g49250.1  
 Orysa4|Os11g38910.1  
 AT2G43250.1 Orysa4|Os04g41330.1  
 AT1G07130.1 Orysa4|Os03g25130.1  
 AT4G18372.1 Orysa4|Os06g46390.1  
 AT5G48520.1 Orysa4|Os06g08730.1  
 Orysa4|Os07g08810.1  
 AT5G45170.1 Orysa4|Os12g43520.1  
 AT1G13635.1 Orysa4|Os08g38170.1  
 AT5G44680.1 Orysa4|Os01g58550.1  
 AT1G75090.1 Orysa4|Os03g10220.1  
 AT5G57970.1 Orysa4|Os04g42290.1  
 AT3G12710.1  
 AT1G15970.1,AT1G80850.1  
 Orysa4|Os09g25290.1  
 Orysa4|Os06g44050.1  
 AT4G02790.1 Orysa4|Os05g35540.1  
 AT2G45280.1 Orysa4|Os01g39630.1  
 AT1G07745.1 Orysa4|Os09g01680.1  
 AT5G52960.1 Orysa4|Os05g49410.1  
 AT5G41580.1 Orysa4|Os06g06870.1  
 AT1G08910.1  
 ATCG00800.1 Orysa4|Os04g16780.1  
 AT5G62840.1 Orysa4|Os01g47190.1  
 AT2G34570.1 Orysa4|Os02g26850.1  
 AT2G35850.1,AT3G52360.1 Orysa4|Os12g42670.1  
 AT1G47640.1 Orysa4|Os03g55730.1  
 AT1G44770.1 Orysa4|Os03g49490.1  
 AT4G02425.1 Orysa4|Os01g21410.1  
 AT5G13100.1 Orysa4|Os01g01295.1  
 Orysa4|Os07g37120.1  
 AT3G26950.1 Orysa4|Os11g31110.1  
 AT3G46200.1 Orysa4|Os05g02640.1  
 AT4G31150.1 Orysa4|Os06g45330.1  
 AT5G58920.1 Orysa4|Os01g26020.1  
 AT3G56910.1 Orysa4|Os01g17150.1  
 AT2G36895.1 Orysa4|Os03g05800.1  
 AT1G55270.1 Orysa4|Os03g07160.1,Orysa4|Os10g26990.1  
 AT3G61350.1 Orysa4|Os02g02350.1  
 AT1G30090.1 Orysa4|Os07g05880.1  
 AT2G24540.1 Orysa4|Os06g44500.1  
 Orysa4|Os02g10850.1  
 AT2G32415.1 Orysa4|Os07g32890.1  
 AT3G21350.1 Orysa4|Os06g11370.1  
 AT5G14710.1 Orysa4|Os10g25600.1  
 AT4G16060.1 Orysa4|Os05g29020.1  
 AT1G77400.1,AT1G21695.1 Orysa4|Os11g07950.1  
 Orysa4|Os03g62330.1  
 AT2G43190.1 Orysa4|Os05g39530.1  
 AT4G21770.1 Orysa4|Os07g46600.1  
 AT3G19220.1 Orysa4|Os09g28480.1  
 AT5G57610.1 Orysa4|Os02g54510.1  
 AT1G16270.1,AT1G79570.1 Orysa4|Os07g25680.1  
 AT3G24720.1,AT3G46920.1 Orysa4|Os06g08280.1  
 AT2G35050.1  
 AT1G04700.1  
 Orysa4|Os03g28300.1  
 Orysa4|Os06g43840.1  
 AT4G10925.1 Orysa4|Os01g36940.1  
 AT4G23960.1  
 AT3G20720.1 Orysa4|Os04g53670.1  
 AT4G31430.2 Orysa4|Os04g56140.1

AT1G25375.1 Orysa4|Os01g04200.1  
AT3G06890.1 Orysa4|Os03g22360.1  
Orysa4|Os07g47660.1  
AT5G48335.1 Orysa4|Os02g38750.1,Orysa4|Os02g39630.1  
AT5G61850.1 Orysa4|Os04g51000.1  
AT1G19140.2 Orysa4|Os03g29180.1  
AT1G33410.1 Orysa4|Os02g04970.1,Orysa4|Os02g05020.1  
AT5G15850.1,AT2G24790.1,AT5G24930.1,AT5G57660.1,AT3G02380.1  
Orysa4|Os04g42020.1,Orysa4|Os02g39710.1  
Orysa4|Os08g15050.1,Orysa4|Os02g08150.1,Orysa4|Os10g41100.1,Orysa4|Os07g15770.1,Orysa4|Os06  
g16370.1,Orysa4|Os09g06464.1  
AT5G55060.1 Orysa4|Os07g32670.1  
AT5G57860.1 Orysa4|Os03g24920.1  
AT5G06830.1 Orysa4|Os06g21560.1  
AT1G09812.1 Orysa4|Os05g35230.1,Orysa4|Os01g65630.1  
AT2G45600.1,AT5G62180.1,AT2G45610.1 Orysa4|Os08g43430.1  
AT1G49660.1,AT1G19190.1,AT3G48690.1,AT1G49640.1,AT1G49650.1,AT3G48700.1,AT1G47480.1,AT2G03550.1  
Orysa4|Os09g28740.1,Orysa4|Os04g37680.1,Orysa4|Os06g11130.1,Orysa4|Os06g11090.1,Orysa4|Os09  
g28630.1,Orysa4|Os09g28720.1,Orysa4|Os08g37050.1,Orysa4|Os02g35940.1,Orysa4|Os09g28690.1,Orysa4|Os09g  
28230.1,Orysa4|Os09g28650.1,Orysa4|Os08g37060.1,Orysa4|Os09g28660.1,Orysa4|Os08g37010.1,Orysa4|Os08g3  
7030.1,Orysa4|Os09g28640.1,Orysa4|Os09g28620.1  
AT5G06570.1  
Orysa4|Os01g06060.1,Orysa4|Os07g06860.1,Orysa4|Os07g06850.1,Orysa4|Os01g06210.1,Orysa4|Os07  
g06840.1,Orysa4|Os01g06220.1,Orysa4|Os03g57640.1  
AT5G16080.1 Orysa4|Os03g15270.1  
AT5G23530.1  
Orysa4|Os06g20200.1,Orysa4|Os07g44890.1,Orysa4|Os11g13570.1,Orysa4|Os07g44910.1,Orysa4|Os07  
g44860.1,Orysa4|Os11g13670.1,Orysa4|Os11g13630.1  
AT3G05120.1,AT3G63010.1,AT5G27320.1 Orysa4|Os05g33730.1  
AT1G68620.1  
Orysa4|Os07g48070.1,Orysa4|Os10g40680.1  
Orysa4|Os03g14730.1  
Orysa4|Os09g28760.1  
Orysa4|Os05g04080.1,Orysa4|Os09g28730.1,Orysa4|Os07g34240.1,Orysa4|Os08g37040.1  
Orysa4|Os02g53960.1,Orysa4|Os07g34170.1,Orysa4|Os09g26500.1,Orysa4|Os07g31790.1  
Orysa4|Os01g27350.1  
Orysa4|Os07g34370.1  
Orysa4|Os12g04140.1,Orysa4|Os05g33940.1,Orysa4|Os07g06830.1  
Orysa4|Os11g04360.1,Orysa4|Os11g04350.1,Orysa4|Os12g04150.1  
Orysa4|Os07g44850.1,Orysa4|Os07g44900.1  
Orysa4|Os07g41590.1  
AT1G09070.1 Orysa4|Os07g47400.1,Orysa4|Os01g70790.1  
AT3G62780.1,AT3G16510.1  
AT4G15740.1,AT4G15755.1  
Orysa4|Os05g05650.1,Orysa4|Os01g27190.1  
AT5G54080.1 Orysa4|Os06g01360.1  
AT1G04650.1 Orysa4|Os03g05040.1  
AT3G63390.1 Orysa4|Os11g40200.1  
AT3G56650.1 Orysa4|Os01g59090.1  
AT4G13140.1 Orysa4|Os02g09440.1  
AT3G17580.1,AT1G48330.1 Orysa4|Os05g04680.1,Orysa4|Os01g18450.1  
AT4G00990.1 Orysa4|Os02g58210.1,Orysa4|Os02g01940.1,Orysa4|Os03g31594.1  
AT3G07610.1,AT1G11950.1,AT1G09060.3,AT4G21430.1,AT1G62310.1  
Orysa4|Os07g37140.1,Orysa4|Os03g22540.1,Orysa4|Os09g22540.1  
Orysa4|Os09g22040.1  
AT3G63290.1 Orysa4|Os10g14180.1  
AT4G01900.1 Orysa4|Os05g04220.1  
AT4G17010.1 Orysa4|Os02g29220.1,Orysa4|Os04g35220.1  
AT4G14590.1 Orysa4|Os11g07030.1  
AT5G52950.1 Orysa4|Os01g12250.1  
AT1G18700.2 Orysa4|Os07g43870.1  
AT5G14420.1,AT3G01650.1 Orysa4|Os01g68060.1  
AT1G79380.1 Orysa4|Os08g04130.1  
AT5G63970.1 Orysa4|Os01g73000.1  
AT1G67800.2  
Orysa4|Os09g39190.1,Orysa4|Os12g19030.1  
Orysa4|Os06g40650.1,Orysa4|Os08g38600.1  
AT1G08480.1 Orysa4|Os08g02080.1  
AT2G37035.1 Orysa4|Os10g33820.1  
AT1G29850.2 Orysa4|Os05g47446.1  
AT3G54750.1 Orysa4|Os12g42700.1  
AT4G17540.1 Orysa4|Os10g41380.1  
AT1G68440.1,AT1G25400.1 Orysa4|Os09g13920.1  
AT5G43050.1 Orysa4|Os04g41150.1  
AT5G42470.1 Orysa4|Os06g50170.1  
AT1G10030.1 Orysa4|Os12g43670.1  
AT2G31490.1 Orysa4|Os01g53140.1  
AT3G62370.1 Orysa4|Os03g19580.1  
AT3G62810.1 Orysa4|Os05g30030.1  
AT4G21530.1 Orysa4|Os02g54490.1  
AT1G79350.1 Orysa4|Os04g52020.1  
Orysa4|Os08g12680.1

Orysa4|Os04g52030.1  
AT5G13830.1 Orysa4|Os03g60750.1  
AT3G52110.1 Orysa4|Os03g07810.1  
AT3G18160.1,AT1G48635.1 Orysa4|Os09g14510.1  
AT3G53470.2 Orysa4|Os03g17660.1  
AT1G16040.1 Orysa4|Os03g03690.1  
AT5G13050.1 Orysa4|Os07g39070.1  
AT4G02075.1 Orysa4|Os05g28730.1,Orysa4|Os01g19800.1  
AT3G47550.3,AT5G62460.1 Orysa4|Os09g24650.1,Orysa4|Os08g33860.1,Orysa4|Os11g38800.1  
AT2G01275.1 Orysa4|Os01g03100.1  
AT1G02610.1  
AT1G14260.1,AT2G02960.5  
AT5G38070.1  
Orysa4|Os02g36740.1  
Orysa4|Os05g47900.1  
AT2G36145.1 Orysa4|Os01g64270.1  
AT2G02410.1 Orysa4|Os03g62610.1  
AT5G52290.1 Orysa4|Os02g42910.1  
AT1G79390.1 Orysa4|Os02g29320.1  
AT4G16450.1 Orysa4|Os08g33460.1  
AT3G15110.1 Orysa4|Os02g20490.1  
AT5G13690.1 Orysa4|Os04g55730.1  
AT2G04690.1 Orysa4|Os06g13100.1  
AT1G28700.1,AT1G28695.1,AT1G28710.1 Orysa4|Os03g52160.1  
AT2G02060.1,AT1G14590.1 Orysa4|Os04g49590.1,Orysa4|Os02g46120.1  
AT5G44820.1,AT4G19970.1  
AT4G15970.1  
Orysa4|Os08g41800.1,Orysa4|Os03g63270.1,Orysa4|Os01g69190.1,Orysa4|Os01g69140.1,Orysa4|Os01g69200.1  
Orysa4|Os03g03730.1  
AT2G04340.1 Orysa4|Os09g30140.1  
AT1G80420.1 Orysa4|Os06g05190.1  
AT3G08840.2 Orysa4|Os07g49110.1  
AT5G06410.1 Orysa4|Os12g27070.1  
AT5G43500.1 Orysa4|Os04g09860.1  
AT2G05120.1 Orysa4|Os03g12450.1  
AT5G52980.1 Orysa4|Os02g13200.1  
AT1G60420.1 Orysa4|Os03g29240.1,Orysa4|Os03g29190.1  
Orysa4|Os11g11440.1  
Orysa4|Os01g58194.1  
AT5G19130.1 Orysa4|Os01g48980.1  
AT3G33530.1,AT2G26610.1 Orysa4|Os02g04440.1  
AT5G51960.1 Orysa4|Os11g03920.1  
AT1G28150.1 Orysa4|Os04g44590.1  
AT2G20980.1 Orysa4|Os09g36820.1  
AT1G77540.1,AT1G21770.1 Orysa4|Os04g35200.1  
AT5G23220.1,AT5G23230.1 Orysa4|Os04g44420.1  
AT1G59600.1 Orysa4|Os01g41000.1,Orysa4|Os07g39730.1  
AT2G04790.2 Orysa4|Os02g37600.1  
AT4G06676.1 Orysa4|Os04g35380.1  
AT3G29280.1 Orysa4|Os03g11130.1,Orysa4|Os03g15190.1  
AT5G42370.1 Orysa4|Os02g37910.1  
AT1G51400.1,AT3G21055.1 Orysa4|Os02g37060.1  
AT3G02860.2 Orysa4|Os05g41530.1  
AT2G45130.1 Orysa4|Os10g25310.1,Orysa4|Os03g29250.1,Orysa4|Os07g42330.1  
AT5G20150.1,AT2G26660.1 Orysa4|Os02g10780.1,Orysa4|Os06g40120.1  
AT5G37480.1 Orysa4|Os03g53740.1  
AT2G01460.1 Orysa4|Os04g21110.1  
AT2G35290.1 Orysa4|Os03g07400.1,Orysa4|Os12g25770.1  
AT4G37925.1 Orysa4|Os04g45600.1  
AT4G22000.1 Orysa4|Os05g02410.1  
AT1G65720.1 Orysa4|Os03g01960.1,Orysa4|Os10g34270.1  
AT4G24700.1 Orysa4|Os02g38170.1  
AT2G39170.1 Orysa4|Os08g05630.1  
AT3G51610.1 Orysa4|Os05g07640.1  
AT1G65680.1  
Orysa4|Os04g46630.1,Orysa4|Os03g44290.1,Orysa4|Os02g44106.1,Orysa4|Os04g46650.1,Orysa4|Os02g44108.1  
AT2G03090.1,AT1G26770.1,AT1G69530.3,AT2G40610.1,AT5G56320.1 Orysa4|Os02g51040.1  
AT3G03220.1 Orysa4|Os04g49410.1  
AT2G28950.1,AT2G39700.1,AT3G55500.1 Orysa4|Os03g60720.1  
AT2G20750.1,AT4G28250.1 Orysa4|Os02g42650.1  
AT4G17030.1 Orysa4|Os07g31390.1  
AT1G20190.1 Orysa4|Os04g15840.1  
AT4G38210.1 Orysa4|Os06g41700.1  
AT2G45110.1  
AT3G60570.1  
AT5G02260.1,AT2G37640.1  
AT5G39290.1,AT5G39270.1  
Orysa4|Os03g01650.1,Orysa4|Os03g01270.1,Orysa4|Os03g01260.1,Orysa4|Os10g40730.1,Orysa4|Os03g01610.1,Orysa4|Os10g40710.1,Orysa4|Os03g01630.1,Orysa4|Os10g40720.1,Orysa4|Os10g40700.1  
Orysa4|Os01g60770.1,Orysa4|Os05g39990.1

Orysa4|Os01g16770.1  
Orysa4|Os03g21820.1  
Orysa4|Os04g44780.1  
Orysa4|Os02g16839.1,Orysa4|Os02g16850.1,Orysa4|Os06g50400.1,Orysa4|Os02g16730.1,Orysa4|Os02g16809.1,Orysa4|Os10g30330.1,Orysa4|Os03g06020.1,Orysa4|Os02g16800.1,Orysa4|Os03g31480.1,Orysa4|Os10g30340.1,Orysa4|Os02g16780.1  
Orysa4|Os05g19570.1,Orysa4|Os05g19600.1,Orysa4|Os01g14650.1,Orysa4|Os03g06000.1  
Orysa4|Os03g06040.1,Orysa4|Os03g06060.1,Orysa4|Os03g06050.1  
AT4G27750.1 Orysa4|Os06g03850.1  
Orysa4|Os10g37650.1  
AT2G25730.1 Orysa4|Os01g40990.1  
AT5G27830.1 Orysa4|Os02g37940.1  
AT1G35340.1 Orysa4|Os11g11210.1  
AT5G51545.1 Orysa4|Os02g03250.1  
AT5G43680.1 Orysa4|Os11g34980.1,Orysa4|Os11g34950.1  
AT5G18400.2 Orysa4|Os04g57810.1  
AT5G37055.1 Orysa4|Os03g25260.1  
AT1G76980.1,AT1G21390.1 Orysa4|Os11g09350.1  
AT5G60980.2 Orysa4|Os02g29480.1,Orysa4|Os04g30430.1  
AT1G69250.1,AT1G13730.1,AT3G25150.1,AT2G03640.2  
AT5G48650.1  
AT3G55540.1  
AT3G07250.1  
Orysa4|Os03g30550.1,Orysa4|Os07g41180.1  
AT3G16200.1 Orysa4|Os01g31220.1  
AT3G59650.1 Orysa4|Os03g10930.1  
AT5G52110.1 Orysa4|Os10g37840.1  
AT4G02485.1 Orysa4|Os11g43610.1  
AT1G21840.1 Orysa4|Os02g07150.1  
AT4G11270.1 Orysa4|Os06g22550.1  
AT4G14310.2 Orysa4|Os02g56520.1  
AT5G09750.1 Orysa4|Os08g01700.1  
AT3G21330.1 Orysa4|Os01g38610.1,Orysa4|Os05g46370.1  
AT5G67060.1,AT3G50330.1 Orysa4|Os08g36740.1,Orysa4|Os09g28210.1  
AT4G00120.1  
Orysa4|Os06g10820.1  
AT5G02130.1 Orysa4|Os05g38330.1  
AT2G36835.1 Orysa4|Os01g56890.1  
AT4G04320.1 Orysa4|Os09g23070.1  
AT2G35585.1,AT1G31940.1 Orysa4|Os02g47000.1  
AT4G32050.1 Orysa4|Os02g55530.1  
AT2G40570.1 Orysa4|Os06g36170.1  
AT1G48140.1 Orysa4|Os02g51420.1  
AT3G20780.1 Orysa4|Os09g10770.1  
AT1G18750.1 Orysa4|Os11g43740.1  
AT1G77980.1,AT1G22130.1,AT1G77950.1 Orysa4|Os06g11970.1,Orysa4|Os08g38590.1  
AT2G03060.1,AT1G69540.1  
AT2G37240.1 Orysa4|Os03g17600.1  
Orysa4|Os02g35960.1  
AT5G12220.1 Orysa4|Os12g08800.1  
AT5G23395.1 Orysa4|Os04g44550.1  
AT5G52190.1 Orysa4|Os04g48020.1  
AT3G01800.1 Orysa4|Os04g41300.1  
AT4G01710.1 Orysa4|Os11g35360.1  
AT5G08060.1 Orysa4|Os01g55770.1  
AT1G30120.1,AT2G34590.1 Orysa4|Os03g44300.1,Orysa4|Os12g42230.1  
AT1G55510.1,AT3G13450.1 Orysa4|Os07g07470.1  
AT5G22580.1 Orysa4|Os11g05290.1  
AT3G25545.1 Orysa4|Os01g11970.1  
AT3G25870.1,AT1G13360.1 Orysa4|Os01g04010.1  
AT5G09270.1 Orysa4|Os01g64190.1  
AT3G52940.1 Orysa4|Os01g25189.1,Orysa4|Os09g39220.1  
AT2G25100.1 Orysa4|Os11g05570.1  
AT5G20170.1 Orysa4|Os12g44140.1  
AT1G01780.1,AT3G61230.1,AT1G10200.1,AT2G45800.1  
Orysa4|Os03g15940.1,Orysa4|Os10g35930.1,Orysa4|Os02g42820.1,Orysa4|Os04g45010.1  
AT3G55770.1,AT2G39900.1  
Orysa4|Os06g13030.1  
Orysa4|Os12g32620.1  
AT1G27530.1 Orysa4|Os10g13800.1  
AT1G80860.1 Orysa4|Os02g39880.1  
AT2G45690.1 Orysa4|Os02g03070.1  
AT5G21070.1 Orysa4|Os01g17020.1  
AT1G26090.1 Orysa4|Os02g48130.1  
AT3G09050.1 Orysa4|Os01g63410.1  
Orysa4|Os05g37780.1  
AT5G58200.1 Orysa4|Os06g08390.1  
AT2G42820.1 Orysa4|Os01g52780.1  
AT5G50720.1,AT4G24960.1 Orysa4|Os11g30500.1,Orysa4|Os08g36440.1  
AT1G74520.1 Orysa4|Os11g38920.1,Orysa4|Os02g51290.1,Orysa4|Os06g12220.1  
AT1G69700.1  
AT5G62490.1



Orysa4|Os09g27730.1  
AT5G66090.1 Orysa4|Os09g36990.1  
AT5G60590.2 Orysa4|Os03g10450.1  
AT5G13680.1 Orysa4|Os07g37640.1  
AT5G51510.1 Orysa4|Os10g36480.1  
AT3G26750.1 Orysa4|Os02g03820.1  
AT3G22990.1 Orysa4|Os07g41900.1  
AT1G05205.1 Orysa4|Os06g46700.1  
AT2G44760.1 Orysa4|Os04g46100.1  
AT3G04020.1 Orysa4|Os03g16870.1  
AT4G30710.1,AT2G24070.1 Orysa4|Os08g34320.1,Orysa4|Os09g25500.1  
AT1G49890.1,AT3G19570.2 Orysa4|Os03g10820.1,Orysa4|Os03g55470.1  
AT3G60000.1,AT2G44190.1 Orysa4|Os09g11440.1  
AT5G43160.1  
AT4G30740.1  
AT4G25190.1  
AT2G20815.1  
Orysa4|Os02g55110.1  
Orysa4|Os07g02470.1  
Orysa4|Os10g20510.1  
AT1G16650.1 Orysa4|Os12g41670.1  
AT4G29890.1 Orysa4|Os06g48510.1  
AT3G09150.2 Orysa4|Os01g72090.1  
AT3G12210.2 Orysa4|Os03g51880.1  
AT3G56290.1 Orysa4|Os01g60830.1  
AT5G17280.1 Orysa4|Os09g36120.1  
AT1G08250.1,AT2G27820.1 Orysa4|Os04g33390.1,Orysa4|Os09g39230.1,Orysa4|Os09g39260.1  
AT5G22630.1,AT3G44720.1  
Orysa4|Os08g33260.1  
Orysa4|Os07g32774.1  
Orysa4|Os04g55780.1,Orysa4|Os06g45930.1  
Orysa4|Os02g27730.1  
AT1G32730.1 Orysa4|Os08g03550.1  
AT3G47833.1,AT5G62575.2 Orysa4|Os09g21470.1  
AT1G21790.1 Orysa4|Os01g64930.1  
AT2G38570.1 Orysa4|Os03g21630.1  
AT2G18410.1 Orysa4|Os03g10460.1  
AT1G65270.1 Orysa4|Os11g16320.1  
AT4G04614.1 Orysa4|Os06g42430.1  
AT1G31780.1 Orysa4|Os03g12460.1  
AT1G31690.1,AT1G31710.1,AT1G31670.1 Orysa4|Os06g23140.1,Orysa4|Os06g23114.1  
AT4G12290.1,AT3G43670.1,AT1G62810.1 Orysa4|Os04g20164.1  
AT4G14940.1  
AT1G31680.1  
AT4G12270.1  
AT4G12280.1  
AT1G09010.1 Orysa4|Os05g32530.1  
AT5G55610.1 Orysa4|Os12g31490.1  
AT2G39725.1 Orysa4|Os08g17650.1  
AT3G52210.3 Orysa4|Os02g54000.1  
AT2G20410.1 Orysa4|Os03g64250.1  
AT2G34585.1 Orysa4|Os07g05950.1  
AT2G24970.1 Orysa4|Os01g56090.1  
AT3G10080.1 Orysa4|Os02g32980.1  
AT1G10460.1 Orysa4|Os03g08150.1  
AT5G61750.1 Orysa4|Os11g33110.1  
AT3G62020.1 Orysa4|Os05g19670.1,Orysa4|Os01g14670.1,Orysa4|Os01g18170.1  
AT5G38940.1,AT5G39190.1,AT5G39120.1,AT5G39180.1,AT4G14630.1,AT3G05950.1,AT5G38910.1,AT5G39160.1,A  
T5G39110.1,AT5G39150.1,AT5G38960.1,AT5G38930.1,AT5G39130.1  
Orysa4|Os04g52720.1,Orysa4|Os08g09020.1,Orysa4|Os08g09000.1,Orysa4|Os08g09080.1,Orysa4|Os08  
g09040.1,Orysa4|Os12g05840.1,Orysa4|Os08g08990.1,Orysa4|Os12g05860.1,Orysa4|Os02g29020.1,Orysa4|Os08g  
08960.1,Orysa4|Os08g09010.1  
AT1G72610.1,AT5G20630.1 Orysa4|Os08g35760.1  
AT1G18970.1,AT1G18980.1,AT1G74820.1  
AT5G26700.1,AT3G05930.1  
AT1G09560.1  
AT3G04180.1  
AT5G38950.1,AT5G39100.1  
Orysa4|Os08g13440.1,Orysa4|Os08g08920.1,Orysa4|Os12g05880.1,Orysa4|Os08g08980.1  
Orysa4|Os05g10830.1,Orysa4|Os02g29010.1  
Orysa4|Os09g39520.1  
Orysa4|Os08g35750.1  
AT3G12270.1 Orysa4|Os07g44640.1  
AT4G29510.1,AT2G19670.1 Orysa4|Os09g19560.1  
AT4G26240.1 Orysa4|Os01g37850.1  
AT4G33140.1 Orysa4|Os06g09320.1  
AT4G22550.1 Orysa4|Os02g44290.1  
AT3G27930.1 Orysa4|Os05g50210.1,Orysa4|Os05g50200.1  
AT4G01290.1 Orysa4|Os06g01680.1  
AT3G15420.1 Orysa4|Os04g44770.1  
AT3G21400.1 Orysa4|Os12g35550.1  
AT1G19100.1 Orysa4|Os11g26830.1

AT5G50780.1 Orysa4|Os02g27000.1  
AT5G13130.1,AT4G24970.1  
Orysa4|Os01g36840.1  
Orysa4|Os04g24550.1  
AT5G03455.1 Orysa4|Os10g39860.1,Orysa4|Os03g01770.1  
AT3G24160.1 Orysa4|Os08g45220.1  
AT3G53440.1 Orysa4|Os01g40000.1  
AT2G42510.1,AT1G54380.1 Orysa4|Os11g18830.1  
AT4G12230.1 Orysa4|Os10g08840.1  
AT5G65250.1 Orysa4|Os08g37820.1  
AT2G47910.1 Orysa4|Os08g07060.1  
AT5G53070.1 Orysa4|Os05g45270.1  
AT4G17486.1,AT5G47310.1 Orysa4|Os03g01130.1  
AT1G47740.1 Orysa4|Os03g10200.1  
AT2G25190.1,AT1G80690.1,AT5G25170.1  
Orysa4|Os04g46290.1,Orysa4|Os02g43840.1  
Orysa4|Os06g36490.1  
AT3G20680.1 Orysa4|Os05g42100.1  
AT4G17240.1 Orysa4|Os03g53970.1,Orysa4|Os05g46920.1  
AT1G79190.1 Orysa4|Os10g42510.1  
AT1G75980.1 Orysa4|Os02g02810.1  
AT5G27710.1 Orysa4|Os07g47570.1  
AT1G28530.1 Orysa4|Os02g01970.1  
AT3G03210.1 Orysa4|Os10g39400.1  
AT4G17430.1 Orysa4|Os10g41180.1  
AT4G13330.1 Orysa4|Os04g43170.1  
AT1G70670.1,AT1G70680.1 Orysa4|Os06g14370.1  
AT2G33380.1,AT4G26740.1 Orysa4|Os04g43200.1  
AT5G55240.1  
AT1G23250.1,AT1G23240.1  
AT5G29560.1  
Orysa4|Os06g14350.1,Orysa4|Os02g50140.1,Orysa4|Os06g14324.1  
Orysa4|Os02g50150.1  
Orysa4|Os03g12230.1  
AT4G19003.1 Orysa4|Os01g46932.1  
AT4G26980.1 Orysa4|Os06g46590.1  
AT2G20515.1 Orysa4|Os04g43670.1  
AT3G15180.1 Orysa4|Os05g48340.1  
AT2G33585.1 Orysa4|Os08g40190.1  
AT2G34050.1 Orysa4|Os02g20860.1  
AT3G13882.1 Orysa4|Os01g39010.1  
AT1G60500.1,AT1G60540.1 Orysa4|Os03g15420.1,Orysa4|Os04g04060.1  
AT1G60530.1  
Orysa4|Os04g04050.1  
AT1G67600.1,AT1G24350.1 Orysa4|Os08g03370.1  
AT3G61770.1 Orysa4|Os05g45770.1  
AT3G12685.1 Orysa4|Os06g33930.1  
Orysa4|Os04g40980.1  
AT3G03990.1 Orysa4|Os03g10620.1  
AT4G37470.1 Orysa4|Os03g32270.1  
AT3G24420.1  
AT2G28380.1 Orysa4|Os10g33970.1  
Orysa4|Os05g05790.1  
AT1G32050.1 Orysa4|Os02g47010.1,Orysa4|Os04g50890.1  
AT1G11180.1,AT2G20840.1,AT1G61250.1 Orysa4|Os05g42330.1,Orysa4|Os01g57220.1,Orysa4|Os07g37740.1  
AT1G03550.1  
Orysa4|Os08g06440.1  
Orysa4|Os03g38590.1  
Orysa4|Os03g38600.1  
AT5G47470.1,AT4G16620.1 Orysa4|Os11g37720.1,Orysa4|Os06g01660.1,Orysa4|Os07g30210.1  
AT5G64700.1  
Orysa4|Os05g01580.1,Orysa4|Os01g10980.1,Orysa4|Os12g33300.1,Orysa4|Os01g10970.1,Orysa4|Os05  
g01570.1  
AT1G09380.1 Orysa4|Os01g19240.1,Orysa4|Os01g19290.1  
AT4G08290.1 Orysa4|Os10g14920.1,Orysa4|Os02g52930.1  
AT4G19185.1,AT3G45870.1,AT5G45370.2 Orysa4|Os02g47500.1  
AT4G28040.1,AT4G30420.1 Orysa4|Os09g25770.1  
AT1G68170.1,AT1G25270.1 Orysa4|Os04g59120.1  
AT3G18200.1 Orysa4|Os01g02870.1,Orysa4|Os08g44750.1  
AT4G01450.2,AT3G30340.1,AT4G01440.1,AT4G01430.1  
Orysa4|Os06g01840.1,Orysa4|Os06g01972.1,Orysa4|Os06g01966.1,Orysa4|Os04g34490.1,Orysa4|Os02  
g01326.1  
AT5G07050.1 Orysa4|Os05g33900.1,Orysa4|Os01g58910.1,Orysa4|Os05g41420.1  
AT1G43650.1  
AT1G60050.1  
AT2G37460.1,AT2G39510.1,AT2G37450.1  
AT1G21890.1,AT1G44800.1  
AT3G28060.1  
AT3G53210.1,AT1G75500.1  
AT3G28050.1  
AT1G11460.1,AT1G01070.1,AT1G11450.1  
AT5G40210.1,AT3G28080.1,AT3G28070.1,AT3G28130.2,AT5G40230.1,AT3G28100.1

AT3G56620.1,AT2G40900.1  
AT4G24980.1  
AT1G70260.1  
AT4G08300.1  
Orysa4|Os07g34110.1,Orysa4|Os07g34070.1,Orysa4|Os01g36580.1  
Orysa4|Os01g36590.1  
Orysa4|Os07g34340.1,Orysa4|Os04g34530.1,Orysa4|Os10g12500.1,Orysa4|Os12g03920.1,Orysa4|Os11  
g04140.1,Orysa4|Os08g31130.1,Orysa4|Os10g12400.1  
Orysa4|Os10g07998.1  
Orysa4|Os11g04130.1  
Orysa4|Os12g18960.1  
Orysa4|Os09g25784.1,Orysa4|Os09g25800.1  
Orysa4|Os09g25810.1  
Orysa4|Os10g12390.1  
Orysa4|Os04g38430.1  
AT3G27230.1,AT5G40830.1 Orysa4|Os06g04680.1  
AT1G29790.1 Orysa4|Os10g42770.1  
AT3G05390.1 Orysa4|Os06g27980.1  
AT4G01240.1  
Orysa4|Os08g02150.1  
AT5G06970.1 Orysa4|Os03g47930.1  
AT2G25800.1 Orysa4|Os08g30070.1,Orysa4|Os09g17760.1  
AT4G11670.1  
AT2G20010.1  
Orysa4|Os04g48040.1  
AT1G14685.1,AT1G68120.1,AT2G01930.1 Orysa4|Os10g02620.1,Orysa4|Os10g02509.1,Orysa4|Os10g02584.1  
AT5G42520.1 Orysa4|Os06g04010.1  
AT2G35550.1  
AT4G38910.1,AT2G21240.1  
AT5G43580.1,AT2G38870.1,AT3G46860.1,AT2G38900.1,AT5G43570.1,AT3G50020.1 Orysa4|Os06g21540.1  
Orysa4|Os05g25630.1  
AT1G43800.1 Orysa4|Os01g65830.1  
AT2G43710.1 Orysa4|Os01g69080.1  
AT5G16230.1,AT3G02630.1,AT3G02620.1,AT3G02610.1  
AT5G16240.1  
Orysa4|Os03g53010.1  
AT5G56760.1 Orysa4|Os05g45710.1,Orysa4|Os01g52260.1  
AT2G17640.1,AT4G35640.1 Orysa4|Os03g04140.1  
AT3G13110.1,AT1G55920.1  
Orysa4|Os02g10830.1  
AT1G53670.1 Orysa4|Os06g27760.1  
AT4G21860.1 Orysa4|Os05g33510.1  
AT4G21830.1,AT4G21850.1  
AT4G04800.1  
Orysa4|Os03g24600.1  
AT5G18970.1 Orysa4|Os05g33220.1  
AT1G29520.1 Orysa4|Os01g50440.1  
AT1G04560.1 Orysa4|Os05g31670.1,Orysa4|Os07g24000.1  
AT5G46530.1  
Orysa4|Os01g14530.1  
Orysa4|Os10g32720.1  
AT5G65760.1 Orysa4|Os01g56150.1  
AT2G24280.1 Orysa4|Os06g43930.1  
AT5G22860.1  
AT3G28680.1  
AT5G18810.1 Orysa4|Os03g24890.1  
AT1G55310.2,AT3G13570.1 Orysa4|Os03g25770.1,Orysa4|Os07g43950.1  
AT3G55460.1 Orysa4|Os12g38430.1,Orysa4|Os02g15310.1  
Orysa4|Os11g47830.1  
AT1G09160.1 Orysa4|Os07g49040.1,Orysa4|Os03g18970.1  
AT1G47380.1 Orysa4|Os04g37660.1,Orysa4|Os02g35910.1  
AT1G68410.1  
Orysa4|Os03g27780.1  
Orysa4|Os09g28560.1  
AT1G08840.1 Orysa4|Os04g49860.1  
AT1G31720.1,AT4G19370.1 Orysa4|Os02g47450.1  
AT2G01860.1 Orysa4|Os02g02590.1  
AT5G42880.1,AT4G33390.1,AT2G26570.1 Orysa4|Os03g27800.1,Orysa4|Os07g42700.1  
AT5G55860.1 Orysa4|Os12g17310.1  
AT1G45545.1  
AT1G12150.1  
AT4G17210.1,AT3G13190.1  
Orysa4|Os03g01930.1  
Orysa4|Os06g20860.1  
Orysa4|Os09g28450.1  
AT1G74880.1 Orysa4|Os01g72950.1  
AT1G50240.1 Orysa4|Os12g24550.1  
AT4G27900.1,AT5G53420.1 Orysa4|Os05g51690.1  
AT3G21150.1 Orysa4|Os02g07930.1,Orysa4|Os06g45040.1  
AT2G26810.1 Orysa4|Os07g44730.1  
AT2G44360.1 Orysa4|Os09g38080.1  
AT4G32970.1,AT4G32960.1 Orysa4|Os06g05720.1

AT1G47970.1 Orysa4|Os01g22990.1  
AT3G17160.1  
AT3G60240.1 Orysa4|Os07g36940.1  
AT5G53020.1 Orysa4|Os01g36970.1  
AT5G53440.1 Orysa4|Os01g46710.1  
AT3G52115.1 Orysa4|Os06g41050.1  
AT5G11390.1,AT1G68910.1 Orysa4|Os05g15140.1  
AT2G38580.1 Orysa4|Os03g21520.1  
AT5G55820.1 Orysa4|Os09g30070.1,Orysa4|Os08g38310.1  
AT3G63120.1 Orysa4|Os05g33040.1  
AT3G21870.1 Orysa4|Os04g53680.1  
AT3G60550.1,AT2G45080.1 Orysa4|Os04g46660.1  
AT2G44740.1 Orysa4|Os02g43550.1,Orysa4|Os10g41430.1  
AT3G05327.1  
AT5G07450.1,AT5G61650.1  
AT5G61200.1 Orysa4|Os07g40770.1  
AT1G61000.1 Orysa4|Os03g45770.1  
AT5G61040.1,AT5G08010.1 Orysa4|Os12g38730.1  
AT5G17690.1 Orysa4|Os10g17770.1  
AT5G60040.1 Orysa4|Os04g41490.1  
AT3G57660.1  
AT2G01755.1 Orysa4|Os03g50530.1  
AT3G29310.1 Orysa4|Os05g43670.1  
AT3G23330.1 Orysa4|Os07g39090.1  
AT3G26540.1 Orysa4|Os04g35650.1  
AT4G02750.1,AT1G05750.1,AT5G09950.1,AT1G68930.1,AT5G08510.1,AT3G15130.1,AT2G22410.1,AT5G55740.1,A  
T3G26630.1,AT2G37310.1,AT3G21470.1,AT5G16860.1,AT5G61800.1,AT5G15300.1,AT2G34400.1,AT1G69350.1,AT  
5G59600.1,AT5G03800.1,AT2G21090.1,AT3G56550.1,AT1G23450.1,AT4G37380.1,AT1G53600.1,AT1G18485.1,AT3  
G04750.1,AT3G28660.1,AT4G16835.1,AT1G22830.1,AT5G06540.1,AT3G08820.1,AT3G50420.1,AT1G16480.1,AT1G  
06145.1,AT4G38010.1,AT1G15510.1,AT1G29710.1,AT5G04780.1,AT3G61170.1,AT3G18840.1,AT5G15340.1,AT1G59  
720.1,AT3G26780.1,AT4G32430.1,AT3G53360.1,AT1G13410.1,AT2G22070.1,AT1G74400.1,AT4G25270.1,AT4G227  
60.1,AT1G19720.1,AT3G03580.1,AT3G16610.1,AT1G11290.1,AT3G28640.1,AT3G05240.1,AT5G39680.1,AT3G24000  
.1,AT5G37570.1,AT1G14470.1,AT1G31920.1,AT5G59200.1,AT3G18970.1,AT1G56570.1,AT2G42920.1,AT5G42450.1  
,AT3G49710.1,AT1G34160.1,AT4G35130.1,AT5G56310.1,AT3G13880.1,AT2G36980.1,AT3G63370.1,AT2G27610.1,A  
T5G48910.1,AT5G50990.1,AT3G57430.1,AT3G15930.1,AT4G14170.1,AT1G31430.1,AT1G26900.1,AT2G45350.1,AT  
1G28690.1,AT1G62260.1,AT2G33760.1,AT2G02980.1,AT5G43790.1,AT4G18840.1,AT2G17210.1,AT2G01510.1,AT5  
G39350.1,AT1G50270.1,AT1G20230.1,AT3G47840.1,AT3G25970.1,AT4G13650.1,AT1G74600.1,AT1G32415.1,AT5G  
66520.1,AT5G13230.1,AT1G56690.1,AT3G14730.1,AT2G37320.1,AT1G77010.1,AT2G29760.1,AT2G36730.1,AT2G1  
3600.1,AT1G08070.1,AT2G41080.1,AT5G19020.1,AT5G47460.1,AT1G03510.1,AT2G02750.1,AT2G03380.1,AT5G40  
410.1,AT4G14850.1,AT2G20540.1,AT3G46790.1,AT3G14330.1,AT1G25360.1,AT1G33350.1,AT5G66500.1,AT1G092  
20.1,AT1G77170.1,AT2G04860.1,AT3G01580.1,AT3G49140.1  
Orysa4|Os03g56400.1,Orysa4|Os04g58980.1,Orysa4|Os11g29360.1,Orysa4|Os11g10740.1,Orysa4|Os04  
g38980.1,Orysa4|Os08g04400.1,Orysa4|Os08g39130.1,Orysa4|Os04g14130.1,Orysa4|Os05g36350.1,Orysa4|Os10g  
23830.1,Orysa4|Os03g27880.1,Orysa4|Os04g09530.1,Orysa4|Os12g06650.1,Orysa4|Os03g32620.1,Orysa4|Os03g0  
7234.1,Orysa4|Os07g19400.1,Orysa4|Os05g49920.1,Orysa4|Os04g32870.1,Orysa4|Os04g02850.1,Orysa4|Os01g29  
430.1,Orysa4|Os03g63560.1,Orysa4|Os03g38580.1,Orysa4|Os08g15090.1,Orysa4|Os10g30590.1,Orysa4|Os11g149  
80.1,Orysa4|Os03g19980.1,Orysa4|Os09g38310.1,Orysa4|Os03g04390.1,Orysa4|Os03g58100.1,Orysa4|Os06g4792  
0.1,Orysa4|Os02g05720.1,Orysa4|Os08g38610.1,Orysa4|Os01g53610.1,Orysa4|Os06g48660.1,Orysa4|Os07g44170.  
1,Orysa4|Os08g03676.1,Orysa4|Os11g02310.1,Orysa4|Os02g18810.1,Orysa4|Os03g62690.1,Orysa4|Os05g23960.1,  
Orysa4|Os03g16450.1,Orysa4|Os03g11700.1,Orysa4|Os01g36540.1,Orysa4|Os03g43470.1,Orysa4|Os11g17530.1,O  
rysa4|Os01g10800.1,Orysa4|Os11g01836.1,Orysa4|Os01g59890.1,Orysa4|Os01g51810.1,Orysa4|Os01g58630.1,O  
rysa4|Os03g60200.1,Orysa4|Os04g57940.1,Orysa4|Os03g42650.1,Orysa4|Os07g44300.1,Orysa4|Os05g49740.1,Ory  
sa4|Os04g53630.1,Orysa4|Os12g08140.1,Orysa4|Os01g55960.1,Orysa4|Os08g37520.1,Orysa4|Os11g01860.1,Ory  
sa4|Os01g60250.1,Orysa4|Os06g27790.1,Orysa4|Os01g40680.1,Orysa4|Os09g24680.1,Orysa4|Os04g49520.1,Orysa4|  
Os01g28570.1,Orysa4|Os03g06300.1,Orysa4|Os09g24640.1,Orysa4|Os08g06490.1,Orysa4|Os05g12130.1,Orysa4|O  
s01g71180.1,Orysa4|Os11g45410.1,Orysa4|Os05g24150.1,Orysa4|Os05g06150.1,Orysa4|Os02g58330.1,Orysa4|Os  
08g13990.1,Orysa4|Os11g37330.1,Orysa4|Os02g13110.1,Orysa4|Os04g35610.1,Orysa4|Os05g34570.1,Orysa4|Os10g3  
4720.1,Orysa4|Os10g30760.1,Orysa4|Os05g24890.1,Orysa4|Os03g49464.1,Orysa4|Os01g42280.1,Orysa4|Os03g08  
680.1,Orysa4|Os02g53050.1,Orysa4|Os09g24520.1,Orysa4|Os06g03570.1,Orysa4|Os06g46840.1,Orysa4|Os05g381  
90.1,Orysa4|Os01g15530.1,Orysa4|Os01g41650.1,Orysa4|Os01g66160.1,Orysa4|Os07g09370.1,Orysa4|Os05g3392  
0.1,Orysa4|Os03g63260.1,Orysa4|Os06g02200.1,Orysa4|Os03g25380.1,Orysa4|Os01g62220.1,Orysa4|Os07g10400.  
1,Orysa4|Os07g15640.1,Orysa4|Os04g43430.1,Orysa4|Os02g46980.1,Orysa4|Os01g55070.1,Orysa4|Os09g24240.1,  
Orysa4|Os11g05980.1,Orysa4|Os03g62400.1,Orysa4|Os01g08120.1,Orysa4|Os07g20420.1,Orysa4|Os01g10090.1,O  
rysa4|Os09g39970.1,Orysa4|Os02g32780.1,Orysa4|Os06g12510.1,Orysa4|Os11g29230.1,Orysa4|Os04g14450.1,Ory  
sa4|Os06g12360.1,Orysa4|Os02g26940.1,Orysa4|Os07g05560.1,Orysa4|Os03g60690.1,Orysa4|Os10g40920.1,Ory  
sa4|Os02g49830.1,Orysa4|Os06g40860.1,Orysa4|Os04g41120.1,Orysa4|Os02g34960.1,Orysa4|Os03g13230.1,Orysa  
4|Os10g39460.1,Orysa4|Os02g06880.1,Orysa4|Os05g30710.1,Orysa4|Os03g20190.1,Orysa4|Os10g41740.1,Orysa4|  
Os08g05750.1,Orysa4|Os07g06960.1,Orysa4|Os01g74600.1,Orysa4|Os07g14100.1,Orysa4|Os01g62910.1,Orysa4|O  
s06g29290.1,Orysa4|Os05g18950.1,Orysa4|Os12g01850.1,Orysa4|Os12g03450.1,Orysa4|Os05g50460.1,Orysa4|Os  
11g27250.1,Orysa4|Os01g60000.1,Orysa4|Os06g30940.1,Orysa4|Os12g15460.1,Orysa4|Os08g40020.1,Orysa4|Os0  
5g05490.1,Orysa4|Os08g25280.1,Orysa4|Os06g08660.1,Orysa4|Os03g42860.1,Orysa4|Os02g07050.1,Orysa4|Os08  
g28830.1  
AT5G27110.1,AT2G46050.1,AT3G25060.1,AT4G33990.1,AT3G02330.1,AT2G39620.1,AT5G46460.1,AT1G71420.1,A  
T1G74630.1,AT3G13770.1,AT1G43980.1,AT3G22690.1,AT3G22150.1,AT1G71460.1,AT5G08490.1,AT4G14820.1  
Orysa4|Os06g11300.1,Orysa4|Os07g15570.1,Orysa4|Os06g02400.1,Orysa4|Os01g60430.1,Orysa4|Os01  
g46230.1,Orysa4|Os01g72930.1,Orysa4|Os12g06070.1,Orysa4|Os04g01990.1  
AT4G21300.1 Orysa4|Os03g56850.1  
AT3G47530.1 Orysa4|Os08g33700.1  
AT2G35030.1 Orysa4|Os11g24530.1

AT4G18520.1 Orysa4|Os03g44210.1  
AT4G14050.1,AT3G05340.1,AT5G50390.1,AT2G44880.1,AT4G15720.1,AT4G04370.1,AT1G04840.1,AT3G02010.1,AT4G32450.1,AT2G15690.1,AT4G19220.1,AT4G39952.1,AT4G39530.1,AT1G10330.1,AT3G20730.1,AT5G65570.1,AT3G09040.1,AT1G03540.1,AT1G17630.1,AT4G08210.1,AT2G33680.1,AT1G06140.1,AT4G16470.1,AT4G37170.1,AT3G29230.1,AT2G25580.1,AT4G20770.1,AT3G12770.1,AT1G71490.1,AT2G40720.1,AT1G64310.1,AT3G11460.1,AT4G30700.1,AT5G44230.1  
Orysa4|Os06g29800.1,Orysa4|Os01g25530.1,Orysa4|Os11g37660.1,Orysa4|Os02g50280.1,Orysa4|Os11g27240.1,Orysa4|Os09g34870.1,Orysa4|Os07g47370.1,Orysa4|Os12g17080.1,Orysa4|Os01g40720.1,Orysa4|Os01g25270.1,Orysa4|Os05g02210.1,Orysa4|Os12g38880.1,Orysa4|Os08g42610.1,Orysa4|Os12g30620.1,Orysa4|Os01g19380.1,Orysa4|Os01g68490.1,Orysa4|Os04g33840.1,Orysa4|Os03g07330.1,Orysa4|Os07g07620.1,Orysa4|Os09g07780.1  
AT4G01030.1,AT3G62890.1,AT4G31070.1,AT2G34370.1,AT3G51320.1  
AT3G58590.1,AT4G18750.1,AT1G09410.1,AT5G52850.1,AT2G03880.1,AT3G49740.1,AT3G49170.1  
AT1G31790.1  
AT1G77150.1  
AT5G52630.1  
AT4G33170.1,AT5G13270.1  
Orysa4|Os09g29850.1  
Orysa4|Os10g33730.1,Orysa4|Os12g03700.1,Orysa4|Os06g05140.1,Orysa4|Os03g63510.1,Orysa4|Os03g59264.1,Orysa4|Os01g45840.1,Orysa4|Os12g02280.1,Orysa4|Os03g49930.1,Orysa4|Os03g17510.1  
Orysa4|Os01g20770.1  
Orysa4|Os05g25930.1  
Orysa4|Os01g28930.1  
Orysa4|Os01g21050.1  
Orysa4|Os02g44970.1  
Orysa4|Os05g45850.1  
Orysa4|Os08g02040.1  
Orysa4|Os05g30690.1  
AT1G61720.1  
Orysa4|Os04g53800.1,Orysa4|Os04g53920.1,Orysa4|Os04g53830.1,Orysa4|Os04g53850.1,Orysa4|Os04g53810.1  
AT5G58490.1 Orysa4|Os03g60380.1  
AT5G42800.1 Orysa4|Os01g44260.1  
AT5G14700.1 Orysa4|Os05g50250.1,Orysa4|Os01g45200.1  
AT1G51410.1,AT5G19440.1 Orysa4|Os01g34480.1  
AT4G27250.1 Orysa4|Os06g46920.1  
AT2G23910.1,AT4G30470.1 Orysa4|Os10g42620.1  
AT2G02400.1 Orysa4|Os01g74660.1  
AT1G80820.1,AT1G15950.1 Orysa4|Os09g25150.1,Orysa4|Os08g34280.1  
AT4G35420.1 Orysa4|Os08g40440.1  
AT2G33600.1,AT2G33590.1 Orysa4|Os06g41840.1,Orysa4|Os06g41810.1  
AT2G45400.1  
AT1G09480.1,AT1G09490.1,AT1G09500.1  
AT1G09510.1,AT1G66800.1  
Orysa4|Os04g53780.1,Orysa4|Os10g33774.1  
Orysa4|Os07g40690.1,Orysa4|Os07g41070.1  
Orysa4|Os01g61230.1  
Orysa4|Os06g44170.1,Orysa4|Os07g40974.1,Orysa4|Os06g44180.1  
Orysa4|Os09g09270.1,Orysa4|Os09g08720.1,Orysa4|Os02g56690.1,Orysa4|Os01g18120.1,Orysa4|Os02g56700.1,Orysa4|Os01g18110.1,Orysa4|Os02g56460.1  
Orysa4|Os09g04050.1,Orysa4|Os08g17500.1  
Orysa4|Os02g08420.1  
Orysa4|Os09g09230.1  
Orysa4|Os09g31490.1,Orysa4|Os09g31502.1,Orysa4|Os09g31498.1,Orysa4|Os09g31514.1  
Orysa4|Os09g31518.1  
Orysa4|Os06g41800.1  
Orysa4|Os03g60279.1,Orysa4|Os08g08500.1  
Orysa4|Os09g31506.1  
Orysa4|Os09g31510.1  
Orysa4|Os09g31494.1  
AT2G18910.1 Orysa4|Os02g26370.1  
AT3G09890.1 Orysa4|Os03g05260.1  
AT3G63220.2 Orysa4|Os10g24900.1  
AT4G03100.1 Orysa4|Os12g34840.1  
AT2G46710.1 Orysa4|Os04g48790.1,Orysa4|Os02g45600.1  
AT5G22400.1,AT3G11490.1 Orysa4|Os11g05540.1  
AT2G27440.1,AT1G08340.1  
Orysa4|Os12g05900.1  
Orysa4|Os01g73630.1  
AT3G32940.1 Orysa4|Os08g01070.1  
AT3G05680.1 Orysa4|Os03g35340.1  
AT2G27385.1,AT5G22430.1 Orysa4|Os02g33170.1  
AT5G63540.1 Orysa4|Os04g32090.1  
AT4G10110.1 Orysa4|Os01g65530.1  
AT3G45300.1 Orysa4|Os05g03480.1  
AT5G57900.1,AT4G30640.1 Orysa4|Os08g16840.1  
AT2G02955.1 Orysa4|Os05g28460.1  
AT5G35400.1 Orysa4|Os06g45250.1  
AT3G15095.1 Orysa4|Os06g24540.1  
AT3G43610.1 Orysa4|Os04g47906.1  
Orysa4|Os04g47912.1  
AT5G24030.1 Orysa4|Os05g13320.1,Orysa4|Os07g08350.1,Orysa4|Os01g28840.1,Orysa4|Os01g12680.1

AT1G62280.1 Orysa4|Os01g14520.1,Orysa4|Os05g18670.1  
AT1G12480.1 Orysa4|Os04g48530.1  
Orysa4|Os06g08970.1,Orysa4|Os02g32814.1  
AT1G27340.1 Orysa4|Os01g69940.1  
AT1G56180.1 Orysa4|Os02g07250.1  
AT5G56550.1 Orysa4|Os02g45930.1,Orysa4|Os04g49370.1  
AT3G27130.1 Orysa4|Os12g25720.1  
AT5G66180.1 Orysa4|Os02g21510.1  
AT3G42630.1 Orysa4|Os08g40870.1  
AT1G22620.1 Orysa4|Os08g01750.1  
AT3G14205.1 Orysa4|Os03g08430.1  
AT1G17340.1  
AT5G20840.1,AT3G43220.1  
Orysa4|Os06g24840.1  
Orysa4|Os10g25180.1  
Orysa4|Os07g23930.1  
AT3G47070.1 Orysa4|Os03g61090.1  
AT1G11380.1 Orysa4|Os07g36820.1  
AT3G47990.1 Orysa4|Os05g05280.1  
AT2G25760.2 Orysa4|Os01g54100.1,Orysa4|Os05g11140.1  
AT5G18190.1,AT3G03940.1 Orysa4|Os01g56580.1  
AT3G13670.1  
AT3G03930.1  
Orysa4|Os01g10150.1  
Orysa4|Os03g57940.1  
AT5G54660.1 Orysa4|Os05g42120.1  
AT1G47420.1 Orysa4|Os04g34100.1  
AT3G01440.1 Orysa4|Os07g01480.1  
AT3G56500.1 Orysa4|Os03g20600.1  
AT4G29860.1 Orysa4|Os06g04040.1  
AT4G28910.1 Orysa4|Os05g48500.1  
AT1G80670.1 Orysa4|Os01g44394.1,Orysa4|Os08g07960.1  
AT1G49910.1,AT3G19590.1 Orysa4|Os03g33580.1  
AT1G15850.1  
AT1G69400.1  
Orysa4|Os07g39950.1  
AT2G43370.1 Orysa4|Os09g33870.1  
AT2G36480.1 Orysa4|Os09g39270.1  
AT2G36485.1  
AT4G13550.1 Orysa4|Os04g43030.1  
AT5G21040.1 Orysa4|Os04g52870.1  
AT4G35980.1 Orysa4|Os05g28480.1  
AT5G67050.1 Orysa4|Os04g56240.1,Orysa4|Os02g52830.1,Orysa4|Os06g10850.1  
AT3G14360.1  
AT1G56630.1,AT1G45201.1,AT5G42930.1  
AT2G44660.1 Orysa4|Os02g46320.1  
AT3G11810.1,AT2G03330.1 Orysa4|Os12g15520.1  
AT5G01160.1 Orysa4|Os10g35190.1  
AT1G27070.1 Orysa4|Os03g48170.1  
AT4G35985.1,AT2G17840.1,AT3G51250.1 Orysa4|Os03g13840.1  
AT4G15450.1,AT3G21600.1 Orysa4|Os01g52480.1  
AT3G21590.1  
Orysa4|Os06g50330.1  
AT5G48720.1 Orysa4|Os01g68930.1  
AT4G10090.1 Orysa4|Os03g17560.1  
AT4G04745.1,AT1G11655.1 Orysa4|Os07g33320.1  
AT3G11860.1,AT3G11890.2 Orysa4|Os08g29100.1  
AT3G01980.1 Orysa4|Os03g63290.1  
AT1G53645.1 Orysa4|Os06g45390.1  
AT3G01370.1 Orysa4|Os04g39060.1  
AT5G16180.1 Orysa4|Os08g27150.1  
AT3G25440.1 Orysa4|Os04g41550.1  
AT3G18390.1 Orysa4|Os05g47850.1  
AT4G14510.1,AT3G23070.1 Orysa4|Os11g37990.1  
Orysa4|Os09g19850.1  
AT5G54840.1 Orysa4|Os07g33850.1  
AT3G21700.3  
AT4G23840.1 Orysa4|Os05g12140.1  
AT3G56460.1 Orysa4|Os05g24880.1  
AT1G23180.1 Orysa4|Os01g34080.1  
AT3G47120.1 Orysa4|Os03g61110.1  
AT3G28990.1,AT3G55240.1 Orysa4|Os05g38680.1  
AT3G10250.1,AT5G04090.2 Orysa4|Os02g04450.1,Orysa4|Os06g49180.1  
AT2G46420.1 Orysa4|Os01g12080.1,Orysa4|Os05g12170.1  
AT5G02580.1  
AT3G61700.1  
Orysa4|Os03g17200.1  
AT1G04390.1 Orysa4|Os06g46240.1  
AT1G26460.1 Orysa4|Os07g40800.1  
AT1G05440.1 Orysa4|Os03g53580.1  
AT2G45870.1,AT3G61320.1 Orysa4|Os03g01570.1  
AT5G05490.1 Orysa4|Os05g50410.1

AT2G04740.1 Orysa4|Os06g21330.1  
AT3G52030.1 Orysa4|Os11g07970.1  
AT1G73470.1 Orysa4|Os09g27610.1  
AT5G21130.1,AT2G27080.1 Orysa4|Os01g59680.1  
AT5G36970.1,AT1G65690.1,AT1G54540.1 Orysa4|Os04g58090.1  
Orysa4|Os08g23460.1,Orysa4|Os09g09460.1  
Orysa4|Os02g30450.1  
AT4G36650.1 Orysa4|Os03g10070.1  
AT5G20110.1 Orysa4|Os01g37490.1  
AT1G23220.1 Orysa4|Os04g38880.1,Orysa4|Os02g36990.1  
AT2G43410.1 Orysa4|Os09g34070.1  
AT2G01440.1 Orysa4|Os02g48100.1  
AT3G13800.1 Orysa4|Os09g19920.1  
AT2G42110.1 Orysa4|Os03g03630.1  
AT3G48900.1 Orysa4|Os08g01130.1  
AT3G48910.1  
AT5G42560.1,AT1G19950.1 Orysa4|Os02g02920.1,Orysa4|Os03g04030.1  
Orysa4|Os10g09870.1,Orysa4|Os03g14610.1  
Orysa4|Os09g36340.1  
AT1G27850.1 Orysa4|Os12g13670.1,Orysa4|Os12g13660.1  
AT1G48580.1 Orysa4|Os07g15500.1  
AT3G48190.1 Orysa4|Os01g01689.1  
AT5G21950.1,AT4G33180.1 Orysa4|Os07g42140.1,Orysa4|Os01g07420.1  
AT1G78210.1,AT5G09430.1,AT4G39955.1 Orysa4|Os07g42994.1,Orysa4|Os03g27110.1  
Orysa4|Os03g08090.1  
Orysa4|Os03g08110.1  
Orysa4|Os10g22960.1  
AT2G03070.1 Orysa4|Os03g31010.1  
AT4G16670.1,AT4G17350.1,AT5G47440.1 Orysa4|Os10g41060.1,Orysa4|Os02g44040.1  
Orysa4|Os10g41870.1  
AT5G45320.1 Orysa4|Os06g49650.1  
AT2G34460.1 Orysa4|Os06g25439.1  
AT4G33800.1 Orysa4|Os03g10260.1  
AT1G08680.1 Orysa4|Os03g20720.1  
Orysa4|Os01g59850.1  
AT2G33770.1 Orysa4|Os05g48390.1  
AT2G16920.1 Orysa4|Os01g03520.1  
Orysa4|Os05g06120.1  
AT5G10470.1,AT5G65460.1 Orysa4|Os06g11380.1  
AT3G52910.1 Orysa4|Os01g55900.1  
AT3G45020.1 Orysa4|Os09g37740.1  
AT5G47740.1 Orysa4|Os06g18820.1  
AT5G23420.1 Orysa4|Os08g01100.1  
AT1G20693.1,AT1G20696.2 Orysa4|Os06g51220.1  
AT2G34450.2 Orysa4|Os01g47600.1  
AT5G05330.1  
AT5G23405.1  
AT2G17560.1  
AT3G51880.2  
Orysa4|Os09g37910.1  
Orysa4|Os02g44930.1  
AT3G10650.1 Orysa4|Os03g57430.1  
Orysa4|Os12g27090.1  
AT5G18830.1 Orysa4|Os05g33810.1  
AT4G30993.2 Orysa4|Os06g08470.1  
AT4G34190.1 Orysa4|Os11g40600.1  
AT1G34360.1 Orysa4|Os02g01110.1  
AT3G43190.1,AT5G20830.1 Orysa4|Os06g09450.1,Orysa4|Os07g42490.1,Orysa4|Os03g28330.1  
AT1G73370.1 Orysa4|Os04g24430.1,Orysa4|Os02g58480.1  
AT4G02280.1 Orysa4|Os03g22120.1  
AT5G37180.1  
AT5G49190.1  
AT4G35870.1 Orysa4|Os03g04450.1  
AT5G17290.1 Orysa4|Os02g02570.1  
AT2G25920.1 Orysa4|Os05g06420.1  
AT2G33250.1 Orysa4|Os01g48820.1  
AT3G04310.1  
AT5G44120.3,AT1G03890.1,AT1G03880.1,AT4G28520.1  
Orysa4|Os02g15178.1,Orysa4|Os02g15070.1,Orysa4|Os02g16830.1,Orysa4|Os01g55690.1,Orysa4|Os02g16820.1,Orysa4|Os02g15090.1,Orysa4|Os08g03410.1,Orysa4|Os03g31360.1,Orysa4|Os02g15150.1,Orysa4|Os02g15169.1,Orysa4|Os10g26060.1,Orysa4|Os02g25640.1  
Orysa4|Os02g25860.1  
Orysa4|Os01g55630.1  
AT5G24314.1 Orysa4|Os01g50930.1  
AT3G06880.1 Orysa4|Os05g30010.1  
AT3G15150.1 Orysa4|Os05g48880.1  
AT1G16070.2 Orysa4|Os02g08310.1  
AT2G41945.1 Orysa4|Os06g10440.1  
AT4G37040.1 Orysa4|Os02g52420.1  
AT1G13270.1,AT3G25740.1 Orysa4|Os04g52100.1  
AT2G45240.1 Orysa4|Os10g36470.1  
Orysa4|Os07g25410.1

Orysa4|Os07g05300.1  
AT3G60300.1 Orysa4|Os11g35870.1  
AT1G31335.1 Orysa4|Os03g56782.1  
AT1G73440.1 Orysa4|Os04g45180.1  
AT5G16510.1 Orysa4|Os04g56520.1  
AT3G02230.1,AT5G15650.1 Orysa4|Os07g41360.1,Orysa4|Os03g40270.1  
AT5G50750.1  
AT3G08900.1  
AT1G52270.1,AT4G28310.1 Orysa4|Os06g02530.1  
AT3G13780.1 Orysa4|Os06g36940.1  
AT1G14340.1 Orysa4|Os04g54870.1  
AT5G46870.1,AT4G17720.1 Orysa4|Os04g53330.1,Orysa4|Os04g50790.1  
AT5G32450.1 Orysa4|Os03g53770.1  
AT3G01210.1  
Orysa4|Os06g02240.1  
Orysa4|Os03g50560.1  
AT2G20940.1 Orysa4|Os09g36982.1  
AT1G63855.3 Orysa4|Os02g02800.1  
AT5G01470.1 Orysa4|Os03g61140.1  
AT3G43540.1 Orysa4|Os09g26580.1  
AT4G00060.1 Orysa4|Os06g45800.1  
AT3G12290.1 Orysa4|Os05g05830.1  
AT2G38660.1 Orysa4|Os09g15810.1  
AT4G00620.1 Orysa4|Os02g02850.1  
AT4G00600.1  
AT1G31817.1 Orysa4|Os03g26860.1,Orysa4|Os01g42640.1  
AT1G04480.1,AT3G04400.1,AT2G33370.1 Orysa4|Os02g56960.1,Orysa4|Os10g32920.1,Orysa4|Os03g04590.1  
AT2G33260.1 Orysa4|Os07g12330.1  
AT3G57910.1 Orysa4|Os08g39880.1  
AT1G05090.1,AT4G20720.1 Orysa4|Os08g34760.1  
AT3G29130.1 Orysa4|Os03g43910.1  
AT1G54990.1 Orysa4|Os11g34140.1  
AT3G12490.2 Orysa4|Os01g16430.1  
AT5G05110.1  
AT2G40880.1  
AT5G12140.1  
Orysa4|Os05g33880.1  
Orysa4|Os05g41460.1  
AT4G16790.1 Orysa4|Os10g41250.1  
AT3G22435.1 Orysa4|Os03g06340.1  
AT5G11520.1 Orysa4|Os01g55540.1  
AT4G31990.3 Orysa4|Os02g55420.1  
AT2G30970.1 Orysa4|Os02g14110.1,Orysa4|Os06g35540.1  
AT5G19550.1  
AT1G62800.2  
AT3G47860.1 Orysa4|Os04g53490.1  
AT4G24200.1 Orysa4|Os06g42490.1  
AT3G56070.1 Orysa4|Os09g39780.1  
AT2G15790.1 Orysa4|Os02g52360.1,Orysa4|Os06g11320.1  
AT2G38730.1 Orysa4|Os03g59700.1  
AT5G67530.1 Orysa4|Os03g10400.1  
AT3G63400.1 Orysa4|Os07g08190.1  
AT3G44600.1 Orysa4|Os08g44330.1  
AT2G36130.1 Orysa4|Os08g44520.1  
AT5G58710.1,AT2G29960.1 Orysa4|Os06g49480.1  
AT5G13120.1 Orysa4|Os05g01270.1  
AT3G62030.1 Orysa4|Os01g18210.1  
AT4G34960.1 Orysa4|Os09g36670.1  
AT4G32420.1 Orysa4|Os02g10970.1  
AT4G33060.1 Orysa4|Os01g40050.1  
AT2G16600.1,AT4G38740.1,AT2G21130.1 Orysa4|Os02g02890.1  
AT1G01940.1 Orysa4|Os06g04000.1  
AT3G55920.1  
AT3G22920.1  
AT4G34870.1  
Orysa4|Os06g49470.1  
Orysa4|Os02g02090.1  
Orysa4|Os10g06630.1  
AT2G28600.1 Orysa4|Os12g05230.1  
AT4G33160.1 Orysa4|Os07g42590.1,Orysa4|Os03g28130.1  
AT1G28250.1 Orysa4|Os07g20410.1  
AT2G21195.2 Orysa4|Os07g16150.1  
AT3G12040.1 Orysa4|Os02g53430.1  
AT3G13620.1 Orysa4|Os03g25920.1  
AT1G31820.1,AT5G05630.1,AT1G31830.1 Orysa4|Os03g37984.1  
AT3G19553.1  
Orysa4|Os03g25820.1  
Orysa4|Os03g25840.1,Orysa4|Os03g25869.1  
Orysa4|Os08g41370.1,Orysa4|Os02g47210.1  
AT4G16410.1 Orysa4|Os07g41630.1  
AT1G64770.1 Orysa4|Os03g06230.1  
AT1G04985.1 Orysa4|Os04g57330.1



AT1G30070.1 Orysa4|Os01g55270.1  
AT3G16560.1 Orysa4|Os04g33080.1  
AT1G07630.1,AT2G28890.1 Orysa4|Os03g60650.1  
AT3G09400.1,AT5G02400.1  
Orysa4|Os05g02110.1,Orysa4|Os03g16760.1  
Orysa4|Os02g46490.1  
AT1G03687.1 Orysa4|Os06g23504.1  
AT5G13890.1 Orysa4|Os11g32950.1  
AT2G29640.1 Orysa4|Os03g15850.1  
AT2G32500.1 Orysa4|Os03g02020.1  
AT1G47813.1,AT1G47820.1 Orysa4|Os06g50350.1  
AT3G08800.1 Orysa4|Os03g17340.1  
AT5G27630.1,AT3G05420.2 Orysa4|Os03g61930.1  
AT5G04420.1 Orysa4|Os02g57690.1  
Orysa4|Os12g35560.1  
AT1G28540.1 Orysa4|Os06g33340.1  
AT5G42330.1 Orysa4|Os07g29190.1  
AT1G15230.1 Orysa4|Os09g17580.1  
AT4G25280.1 Orysa4|Os04g01530.1  
AT5G26667.1 Orysa4|Os02g53790.1,Orysa4|Os07g43170.1  
AT3G60180.1  
Orysa4|Os06g10200.1  
Orysa4|Os06g02000.1  
AT4G20310.1 Orysa4|Os01g46590.1  
AT2G46980.1 Orysa4|Os10g26560.1  
AT1G26750.1 Orysa4|Os12g10650.1  
AT3G52430.1 Orysa4|Os11g09010.1  
AT1G16290.1 Orysa4|Os02g07480.1  
AT3G47000.1,AT3G47040.1,AT3G47010.1,AT3G47050.1 Orysa4|Os05g37700.1  
AT5G20940.1,AT5G20950.1 Orysa4|Os03g53800.1  
AT3G62710.1  
Orysa4|Os03g53790.1  
Orysa4|Os01g56510.1  
Orysa4|Os02g03870.1  
AT1G76920.1 Orysa4|Os04g59010.1  
AT1G18730.1 Orysa4|Os02g51020.1  
AT1G18290.1 Orysa4|Os01g03080.1  
AT5G17070.1 Orysa4|Os06g19650.1  
AT1G62750.1 Orysa4|Os04g45490.1  
AT2G45030.1,AT1G45332.1 Orysa4|Os03g36780.1  
AT1G67180.1 Orysa4|Os08g31930.1  
Orysa4|Os12g14840.1  
AT1G77230.1 Orysa4|Os02g34830.1  
AT4G24110.1 Orysa4|Os03g02300.1  
AT4G12880.1,AT5G15350.1,AT2G27035.1,AT3G01070.1 Orysa4|Os09g38540.1,Orysa4|Os07g02200.1  
AT2G02850.1 Orysa4|Os03g50160.1  
AT5G26330.1 Orysa4|Os07g38290.1  
AT3G18590.1,AT1G48940.1 Orysa4|Os04g57750.1  
AT2G44790.1,AT3G60280.1,AT3G60270.1  
Orysa4|Os02g52180.1,Orysa4|Os04g46130.1,Orysa4|Os02g43660.1,Orysa4|Os06g11490.1  
AT1G64640.1 Orysa4|Os03g02400.1  
AT1G17800.1  
AT1G79800.1  
AT1G22480.1,AT1G72230.1  
AT5G20230.1  
AT1G45063.1,AT2G32300.1  
AT3G27200.1  
AT4G01380.1  
Orysa4|Os03g55120.1  
Orysa4|Os02g15730.1,Orysa4|Os02g15710.1  
Orysa4|Os03g15340.1  
Orysa4|Os02g49850.1  
Orysa4|Os03g50140.1  
Orysa4|Os04g34480.1  
Orysa4|Os06g50650.1,Orysa4|Os06g50420.1  
Orysa4|Os08g37670.1  
Orysa4|Os08g04350.1,Orysa4|Os08g04340.1  
Orysa4|Os03g57740.1  
Orysa4|Os09g36940.1  
Orysa4|Os07g35860.1  
AT2G42560.1,AT2G18340.1 Orysa4|Os04g52110.1,Orysa4|Os02g15250.1,Orysa4|Os03g07180.1  
AT4G36600.1,AT3G53040.1,AT5G44310.2 Orysa4|Os03g20680.1  
AT3G15280.1  
AT3G17520.1  
AT4G21020.1  
AT5G65520.1 Orysa4|Os02g10940.1  
Orysa4|Os02g10950.1  
AT5G57230.1 Orysa4|Os06g28740.1  
AT2G46200.1 Orysa4|Os01g12670.1  
AT1G80290.1 Orysa4|Os08g40920.1  
AT1G71900.1,AT4G09640.1,AT1G34470.1 Orysa4|Os05g35060.1,Orysa4|Os01g65986.1  
AT4G38730.1,AT2G21120.1 Orysa4|Os01g65310.1,Orysa4|Os05g35570.1

AT3G23870.1,AT4G13800.1 Orysa4|Os02g29510.1,Orysa4|Os04g30450.1  
 Orysa4|Os11g09140.1  
 Orysa4|Os05g43790.1  
 AT3G12100.1 Orysa4|Os02g58580.1  
 AT1G77290.1 Orysa4|Os04g35560.1  
 AT3G15395.1 Orysa4|Os02g10370.1  
 AT1G79120.1 Orysa4|Os03g46460.1  
 AT3G14110.1 Orysa4|Os01g32730.1  
 AT2G34710.1,AT1G30490.1 Orysa4|Os12g41860.1,Orysa4|Os03g43930.1  
 AT1G52150.2,AT4G32880.1  
 Orysa4|Os03g55990.1  
 AT4G11790.1 Orysa4|Os03g46480.1  
 AT5G40520.1 Orysa4|Os01g44170.1,Orysa4|Os09g01600.1  
 AT5G17790.1 Orysa4|Os01g59980.1  
 AT5G66350.1,AT1G19790.1,AT4G36260.1,AT3G51060.1,AT1G75520.1  
 Orysa4|Os09g36160.1,Orysa4|Os08g43410.1,Orysa4|Os06g49830.1  
 AT5G12330.1 Orysa4|Os01g72490.1,Orysa4|Os05g32070.1  
 AT5G33210.1  
 AT2G18120.1  
 AT2G21400.1  
 AT3G54430.1  
 AT1G19980.1 Orysa4|Os04g02680.1  
 AT1G49870.1 Orysa4|Os03g40780.1  
 AT3G58470.1 Orysa4|Os03g53890.1  
 Orysa4|Os04g21720.1  
 AT5G44150.1 Orysa4|Os05g48940.1  
 AT1G19270.1 Orysa4|Os06g08400.1,Orysa4|Os12g40490.1  
 AT5G66640.1,AT5G66620.1,AT5G66610.1  
 AT4G36860.2  
 Orysa4|Os03g16090.1  
 AT1G24450.1 Orysa4|Os03g63740.1  
 AT2G21050.1 Orysa4|Os03g14080.1,Orysa4|Os10g05690.1  
 AT2G38120.1 Orysa4|Os01g63770.1  
 AT1G77690.1  
 AT5G01240.1  
 Orysa4|Os05g37470.1  
 AT4G14120.1,AT3G23740.1 Orysa4|Os01g01170.1  
 AT1G13030.1 Orysa4|Os12g19040.1  
 AT1G06510.1 Orysa4|Os01g50120.1  
 AT1G26180.1 Orysa4|Os02g22060.1  
 AT3G52250.1 Orysa4|Os05g03550.1  
 AT5G22940.1,AT2G28110.1 Orysa4|Os03g01760.1  
 AT1G27440.1,AT5G61840.1 Orysa4|Os01g70200.1  
 Orysa4|Os02g32110.1,Orysa4|Os04g32670.1  
 Orysa4|Os10g10080.1  
 Orysa4|Os01g70180.1  
 AT3G07480.1 Orysa4|Os09g33950.1  
 AT4G09680.1 Orysa4|Os09g20910.1  
 AT3G20070.1 Orysa4|Os01g04600.1,Orysa4|Os06g13640.1  
 AT5G42765.1 Orysa4|Os03g56320.1  
 AT4G15420.1 Orysa4|Os01g35040.1  
 AT2G20210.1 Orysa4|Os12g12740.1  
 AT5G58610.1,AT1G05380.1,AT4G14920.1,AT3G14980.1,AT5G63900.1,AT5G36740.1,AT5G36670.1  
 Orysa4|Os01g73480.1,Orysa4|Os04g59510.1,Orysa4|Os07g07690.1,Orysa4|Os03g53630.1,Orysa4|Os04  
 g35430.1  
 AT5G10460.1 Orysa4|Os08g42950.1  
 AT4G22360.1 Orysa4|Os08g39310.1  
 AT5G08120.1 Orysa4|Os09g29970.1,Orysa4|Os06g17440.1  
 AT2G46000.1 Orysa4|Os03g05450.1  
 AT1G49170.1 Orysa4|Os04g58970.1  
 AT3G17670.1 Orysa4|Os04g57780.1  
 AT3G55420.1 Orysa4|Os05g38470.1  
 AT1G23530.1,AT1G70470.1 Orysa4|Os06g28720.1,Orysa4|Os02g47830.1  
 AT4G03080.1 Orysa4|Os05g05240.1  
 AT1G08420.1,AT2G27210.1 Orysa4|Os03g44500.1,Orysa4|Os12g42310.1  
 AT1G03445.1  
 AT2G22530.1 Orysa4|Os02g54070.1  
 AT5G04190.1 Orysa4|Os01g15990.1  
 AT4G08240.1 Orysa4|Os02g35890.1  
 AT1G71790.1 Orysa4|Os03g26450.1  
 AT2G38410.1 Orysa4|Os05g27320.1  
 AT1G76970.1,AT1G21380.1 Orysa4|Os11g09329.1  
 AT5G63640.1 Orysa4|Os08g01740.1  
 AT5G01760.1  
 Orysa4|Os01g61030.1,Orysa4|Os05g39760.1  
 AT5G04000.1 Orysa4|Os05g41620.1  
 AT3G11960.1 Orysa4|Os07g10390.1  
 AT4G19140.1 Orysa4|Os04g51166.1  
 AT1G51745.1 Orysa4|Os01g37790.1  
 AT1G64850.1 Orysa4|Os04g51240.1  
 Orysa4|Os04g51250.1  
 AT3G18800.1 Orysa4|Os04g59050.1

AT1G53500.1,AT3G14790.1,AT1G78570.1 Orysa4|Os03g17000.1  
AT1G63000.1 Orysa4|Os02g45540.1  
Orysa4|Os05g11360.1  
AT2G46915.1 Orysa4|Os06g01460.1  
AT4G02725.1 Orysa4|Os03g49450.1  
AT3G10130.1 Orysa4|Os02g33020.1  
AT2G39530.1 Orysa4|Os11g34730.1  
AT3G09280.1 Orysa4|Os07g36430.1  
AT2G19640.2 Orysa4|Os08g10470.1  
AT3G12010.1 Orysa4|Os10g26140.1  
AT1G11910.1,AT1G62290.1 Orysa4|Os01g47410.1,Orysa4|Os05g49200.1  
AT1G69100.1,AT4G22050.1,AT4G04460.1  
Orysa4|Os01g44130.1  
Orysa4|Os05g04630.1,Orysa4|Os01g18630.1  
Orysa4|Os11g13500.1  
AT2G38695.1 Orysa4|Os09g27070.1  
AT1G22630.1 Orysa4|Os05g01530.1  
AT1G56220.3 Orysa4|Os03g22270.1  
AT1G30880.1 Orysa4|Os04g52180.1  
AT1G52260.1,AT3G16110.1 Orysa4|Os06g06790.1  
AT3G54960.1,AT5G60640.1 Orysa4|Os02g01010.1  
AT3G12350.1 Orysa4|Os12g32630.1  
AT5G38380.2 Orysa4|Os07g18250.1  
AT3G24560.2 Orysa4|Os02g16670.1  
AT4G39630.1 Orysa4|Os08g19370.1  
AT4G30010.1 Orysa4|Os02g07910.1  
AT1G48300.1 Orysa4|Os05g04620.1  
AT4G10610.1 Orysa4|Os08g02330.1  
AT1G53650.1,AT3G14450.1 Orysa4|Os06g35030.1,Orysa4|Os01g11120.1,Orysa4|Os02g14760.1  
AT1G32790.2  
AT3G49390.1  
AT5G24440.1  
Orysa4|Os09g14550.1  
AT5G02710.1 Orysa4|Os03g24844.1  
AT3G63430.1 Orysa4|Os10g02690.1,Orysa4|Os11g37670.1  
AT3G55480.1 Orysa4|Os01g74180.1  
AT5G63150.1 Orysa4|Os03g46730.1  
AT2G37195.1 Orysa4|Os02g56190.1  
AT5G16850.1 Orysa4|Os12g19549.1  
AT1G22770.1 Orysa4|Os01g08700.1  
AT1G33330.1 Orysa4|Os01g66379.1  
AT3G51860.1,AT2G38170.3 Orysa4|Os05g51610.1,Orysa4|Os01g37690.1  
AT1G55720.1,AT3G13320.1,AT1G55730.1 Orysa4|Os04g55940.1,Orysa4|Os03g27960.1  
AT5G01490.1  
Orysa4|Os02g21009.1  
Orysa4|Os02g04630.1  
AT3G48550.1 Orysa4|Os02g30380.1  
AT5G57160.1 Orysa4|Os04g51700.1  
AT1G08390.1 Orysa4|Os03g47990.1  
AT1G79915.1 Orysa4|Os06g43250.1  
AT1G49405.1 Orysa4|Os03g55870.1  
AT2G28370.1 Orysa4|Os03g10870.1,Orysa4|Os10g20250.1  
AT3G50810.1,AT4G37235.1  
AT2G37200.1  
AT3G27110.1 Orysa4|Os01g73910.1  
AT4G35540.1 Orysa4|Os08g42020.1  
AT1G09290.1 Orysa4|Os02g45090.1  
AT3G51010.1 Orysa4|Os05g03540.1  
AT5G44520.1 Orysa4|Os03g56869.1  
AT3G04790.1 Orysa4|Os07g08030.1  
AT2G01290.1,AT1G71100.1  
AT1G07795.1,AT2G28725.1 Orysa4|Os12g37900.1  
AT3G25430.1 Orysa4|Os08g34160.1  
AT3G23100.1 Orysa4|Os03g53000.1  
AT1G61410.1  
AT5G17560.1 Orysa4|Os06g28970.1  
AT5G64680.1 Orysa4|Os08g32690.1,Orysa4|Os01g15520.1  
AT1G71010.1 Orysa4|Os09g23740.1,Orysa4|Os08g33200.1,Orysa4|Os06g14750.1  
AT1G34260.1 Orysa4|Os12g13440.1,Orysa4|Os08g01390.1,Orysa4|Os09g10650.1,Orysa4|Os04g59540.1  
AT4G33240.1,AT3G14270.1 Orysa4|Os08g34950.1  
Orysa4|Os03g28140.1  
AT5G50350.1 Orysa4|Os06g40740.1  
AT4G34140.1 Orysa4|Os01g07540.1  
AT3G56950.1 Orysa4|Os03g20410.1  
AT2G38550.1 Orysa4|Os01g60650.1  
AT4G38490.1 Orysa4|Os09g27690.1  
AT5G58770.1 Orysa4|Os01g63830.1  
AT5G58784.1,AT5G58782.1,AT2G23410.1,AT2G23400.1,AT5G58780.1  
AT5G38530.1 Orysa4|Os06g42560.1  
AT2G46060.1 Orysa4|Os10g30910.1  
AT1G10522.1 Orysa4|Os09g21460.1  
AT1G53200.1 Orysa4|Os06g13570.1

AT2G02880.1 Orysa4|Os03g26220.1  
 AT4G25570.1 Orysa4|Os10g36030.1,Orysa4|Os02g42890.1,Orysa4|Os04g45090.1  
 AT5G38630.1 Orysa4|Os08g29520.1  
 AT1G14730.1 Orysa4|Os03g50820.1  
 AT1G26100.1  
     Orysa4|Os08g01140.1  
     Orysa4|Os10g02920.1  
 AT5G57655.2 Orysa4|Os07g47290.1  
 AT4G18975.1 Orysa4|Os07g36180.1  
 AT5G22820.1 Orysa4|Os03g47980.1  
 AT1G70760.1 Orysa4|Os05g28090.1  
 AT5G11780.1 Orysa4|Os01g41640.1  
 AT3G05880.1,AT3G05890.1 Orysa4|Os07g44180.1,Orysa4|Os05g04700.1,Orysa4|Os03g25460.1  
 AT2G38905.1 Orysa4|Os05g03130.1  
     Orysa4|Os03g17790.1  
 AT3G05330.1 Orysa4|Os02g26140.1  
 AT4G16700.1 Orysa4|Os03g01216.1  
 AT1G06010.1 Orysa4|Os04g56610.1  
 AT2G28105.1 Orysa4|Os10g39830.1  
 AT3G07210.1 Orysa4|Os08g41700.1,Orysa4|Os01g68830.1  
 AT3G62270.1,AT2G47160.1 Orysa4|Os12g37840.1  
 AT1G74810.1,AT1G15460.1 Orysa4|Os01g08020.1  
 AT3G06450.1  
 AT5G25430.1,AT4G32510.1  
 AT2G40760.1 Orysa4|Os05g25780.1  
 AT5G07400.1 Orysa4|Os04g33050.1  
 AT2G37920.1 Orysa4|Os02g35620.1  
 AT4G28025.1 Orysa4|Os02g39730.1  
 AT4G01730.1 Orysa4|Os12g16210.1  
 AT4G15080.1,AT3G22180.1 Orysa4|Os08g44230.1,Orysa4|Os09g38970.1  
     Orysa4|Os04g49560.1  
 AT4G27390.1 Orysa4|Os05g42280.1  
 AT1G77550.1 Orysa4|Os03g08140.1  
 AT5G66810.1 Orysa4|Os10g24070.1  
 AT4G14605.1 Orysa4|Os02g39040.1,Orysa4|Os02g54200.1  
 AT4G38160.2 Orysa4|Os08g40430.1  
 AT4G02990.1 Orysa4|Os05g33500.1  
 AT2G44020.1  
     Orysa4|Os09g26890.1  
 AT5G14760.1 Orysa4|Os02g04170.1  
 AT4G00590.1 Orysa4|Os04g58600.1  
 AT5G61540.1 Orysa4|Os04g46370.1  
 AT4G10100.1 Orysa4|Os02g35200.1  
 AT5G17380.1 Orysa4|Os01g32080.1  
 AT3G22760.1,AT4G14770.1,AT3G22780.1 Orysa4|Os07g07974.1,Orysa4|Os12g41230.1  
 AT3G04850.1  
     Orysa4|Os05g43380.1  
     Orysa4|Os03g43730.1  
 AT5G49555.1 Orysa4|Os12g43590.1  
 AT5G49550.1 Orysa4|Os02g09780.1  
 AT1G04010.1 Orysa4|Os02g56910.1  
 AT1G62830.1 Orysa4|Os02g51880.1  
 AT3G10390.1 Orysa4|Os04g47270.1  
 AT3G13682.1 Orysa4|Os08g04780.1  
 AT1G02700.1,AT4G02140.1 Orysa4|Os07g47840.1  
 AT1G64960.1 Orysa4|Os03g42040.1  
 AT1G02020.1 Orysa4|Os10g11340.1  
 AT1G51405.1 Orysa4|Os03g11770.1  
 AT5G19190.1,AT3G06070.1 Orysa4|Os05g32970.1  
 AT1G74030.1 Orysa4|Os09g20820.1  
 AT2G36530.1 Orysa4|Os06g04510.1,Orysa4|Os10g08550.1,Orysa4|Os03g14450.1  
 AT3G20480.1 Orysa4|Os07g01200.1  
 AT1G51100.1 Orysa4|Os01g48500.1  
 AT5G26760.2 Orysa4|Os05g04370.1  
 AT4G04480.1,AT4G22030.1 Orysa4|Os02g13260.1,Orysa4|Os02g13190.1,Orysa4|Os02g13220.1  
     Orysa4|Os05g04570.1,Orysa4|Os02g28590.1,Orysa4|Os12g01970.1  
 AT3G45050.3 Orysa4|Os06g51470.1  
 AT1G78690.1 Orysa4|Os04g57150.1  
 AT5G20200.1 Orysa4|Os06g40460.1  
 AT3G12650.1 Orysa4|Os02g48680.1  
 AT2G17710.1 Orysa4|Os04g47310.1  
 AT4G11980.1 Orysa4|Os06g03910.1  
 AT2G26340.1 Orysa4|Os03g07960.1  
 AT3G19870.1 Orysa4|Os02g58250.1  
 AT3G15140.1 Orysa4|Os06g24594.1  
 AT1G71430.1 Orysa4|Os01g43060.1  
 AT4G33865.1,AT3G43980.1,AT3G44010.1 Orysa4|Os03g56234.1,Orysa4|Os12g32380.1,Orysa4|Os11g41610.1  
 AT2G36960.1 Orysa4|Os03g13790.1  
 AT4G39380.1  
     Orysa4|Os01g08680.1,Orysa4|Os07g44030.1  
 AT3G06180.1 Orysa4|Os05g32670.1  
 AT2G43110.1 Orysa4|Os04g28060.1

AT4G25315.1 Orysa4|Os09g34120.1  
 AT5G05740.1 Orysa4|Os01g04900.1  
 AT2G22640.1 Orysa4|Os02g58320.1  
 AT3G02220.1 Orysa4|Os01g55730.1  
 AT1G78790.1 Orysa4|Os04g40550.1  
 AT1G09920.1 Orysa4|Os07g46390.1,Orysa4|Os03g24184.1  
 AT4G13400.1 Orysa4|Os05g48230.1  
 AT4G35530.1 Orysa4|Os05g07260.1  
 AT2G35360.1 Orysa4|Os09g39980.1  
 AT2G42220.1 Orysa4|Os09g10750.1  
 AT2G41950.1 Orysa4|Os03g12560.1  
 AT4G14145.1 Orysa4|Os03g17910.1  
 AT4G24290.2 Orysa4|Os01g72860.1,Orysa4|Os07g07194.1  
 AT1G14780.1 Orysa4|Os06g14050.1,Orysa4|Os02g50340.1  
 AT1G29690.1 Orysa4|Os01g54510.1  
 AT1G28380.1 Orysa4|Os05g48360.1  
 Orysa4|Os02g27480.1  
 AT2G46540.1 Orysa4|Os05g46450.1  
 AT1G30845.1 Orysa4|Os03g03530.1  
 AT4G19350.1 Orysa4|Os08g06520.1  
 AT2G20790.1 Orysa4|Os12g34370.1  
 AT4G21780.1 Orysa4|Os03g36960.1  
 AT3G52960.1 Orysa4|Os02g09940.1,Orysa4|Os06g42000.1  
 AT1G65970.1,AT1G60740.1,AT1G65980.1 Orysa4|Os01g48420.1  
 AT3G06050.1 Orysa4|Os01g16152.1  
 AT3G27670.1 Orysa4|Os01g07490.1  
 AT1G53760.1 Orysa4|Os02g05870.1  
 AT4G31560.1 Orysa4|Os01g71330.1  
 AT2G02590.1 Orysa4|Os03g58620.1  
 AT1G20830.1 Orysa4|Os04g49540.1  
 AT5G49150.1 Orysa4|Os09g25650.1  
 AT3G59490.1 Orysa4|Os09g33992.1  
 AT1G71780.1 Orysa4|Os01g51800.1  
 Orysa4|Os01g08950.1  
 AT5G09225.1 Orysa4|Os11g04174.1,Orysa4|Os12g03980.1  
 AT3G04160.1 Orysa4|Os04g28170.1  
 AT4G09060.1,AT1G14680.1 Orysa4|Os02g58470.1  
 AT3G32930.1 Orysa4|Os07g41710.1  
 AT1G18480.1 Orysa4|Os11g15570.1  
 AT1G70150.1 Orysa4|Os07g29770.1  
 AT3G48195.1 Orysa4|Os01g36870.1  
 AT1G54650.1 Orysa4|Os07g23169.1  
 AT2G41760.1 Orysa4|Os05g32190.1  
 AT4G28160.1,AT2G20870.1 Orysa4|Os07g37850.1  
 AT3G09860.1 Orysa4|Os03g38120.1  
 AT2G45860.1 Orysa4|Os02g57830.1  
 AT4G19750.1,AT4G19820.1,AT4G19730.1,AT4G19740.1,AT4G19810.1,AT4G19770.1,AT4G19720.1,AT4G19800.1,A  
 T4G19760.1 Orysa4|Os11g27400.1,Orysa4|Os04g30770.1  
 AT5G41270.1 Orysa4|Os01g34660.1,Orysa4|Os01g35990.1  
 AT1G07910.1 Orysa4|Os07g09400.1  
 AT1G07020.1 Orysa4|Os01g38490.1  
 AT1G78650.1 Orysa4|Os01g10690.1  
 AT1G12244.1 Orysa4|Os10g40650.1  
 AT1G03080.1,AT3G22790.1,AT4G14760.1 Orysa4|Os10g28610.1  
 AT5G58320.2,AT2G30500.1 Orysa4|Os05g07680.1,Orysa4|Os01g07370.1  
 AT4G02710.1  
 AT3G10880.1,AT5G05180.1  
 Orysa4|Os03g43684.1,Orysa4|Os12g41200.1  
 Orysa4|Os03g06510.1  
 Orysa4|Os01g07360.1  
 AT3G15353.1 Orysa4|Os05g11320.1  
 AT5G60370.1 Orysa4|Os05g03200.1  
 AT4G12970.1 Orysa4|Os01g68598.1  
 Orysa4|Os08g41360.1  
 AT5G59460.1 Orysa4|Os01g05130.1  
 AT3G57320.1 Orysa4|Os07g46710.1  
 AT2G18540.1 Orysa4|Os03g10110.1  
 AT4G36700.1  
 AT3G50430.1 Orysa4|Os07g02950.1  
 AT1G45150.1 Orysa4|Os07g39300.1  
 AT5G16810.1 Orysa4|Os02g46750.1  
 AT5G14410.1 Orysa4|Os01g71210.1  
 AT1G15220.1 Orysa4|Os02g17520.1  
 AT4G37820.1,AT2G22795.1 Orysa4|Os06g36050.1,Orysa4|Os03g51640.1  
 AT4G33740.1  
 Orysa4|Os03g56200.1  
 Orysa4|Os03g60170.1  
 AT2G03780.1 Orysa4|Os01g16100.1  
 AT5G54850.1 Orysa4|Os07g33650.1  
 AT1G51080.1 Orysa4|Os03g04580.1  
 AT1G15410.1 Orysa4|Os01g37470.1  
 AT5G46070.1 Orysa4|Os02g20410.1

AT1G03830.1  
Orysa4|Os05g48860.1  
AT2G45320.1 Orysa4|Os06g37430.1  
AT5G16520.1 Orysa4|Os01g01040.1  
AT3G20490.1 Orysa4|Os04g53360.1  
AT5G35520.1 Orysa4|Os02g40680.1  
AT3G45040.1 Orysa4|Os02g05320.1  
AT4G31460.1 Orysa4|Os07g36090.1  
AT3G16830.1 Orysa4|Os01g15020.1  
AT1G15750.1,AT1G80490.1 Orysa4|Os03g14980.1  
AT5G27030.1  
AT3G15880.2  
AT2G25420.1  
Orysa4|Os08g06480.1  
AT5G55500.1 Orysa4|Os08g39380.1  
AT3G19800.1 Orysa4|Os04g44340.1  
AT5G43750.1 Orysa4|Os01g70400.1  
AT1G20770.1 Orysa4|Os04g43040.1  
AT1G74640.1 Orysa4|Os09g24710.1  
AT4G14970.1 Orysa4|Os07g05960.1  
AT3G08620.1,AT2G38610.1 Orysa4|Os07g12490.1,Orysa4|Os03g60110.1  
AT1G09660.1 Orysa4|Os05g34670.1,Orysa4|Os01g66300.1  
AT4G26480.1,AT5G56140.1 Orysa4|Os02g49080.1  
Orysa4|Os01g60260.1,Orysa4|Os05g40290.1  
AT1G70570.1 Orysa4|Os02g03850.1  
AT4G29660.1 Orysa4|Os05g46280.1  
AT2G22370.1 Orysa4|Os02g10050.1  
AT5G03770.1 Orysa4|Os01g63840.1  
AT4G21445.1 Orysa4|Os04g54320.1  
AT2G26540.1 Orysa4|Os03g08730.1  
AT1G27300.1 Orysa4|Os02g30610.1  
AT3G25690.1 Orysa4|Os12g01449.1  
AT1G07120.1 Orysa4|Os03g18300.1  
AT4G18570.1 Orysa4|Os05g49820.1,Orysa4|Os01g46340.1  
AT1G48280.1  
AT1G11070.1  
AT4G04980.1  
Orysa4|Os08g03560.1  
AT3G56210.1 Orysa4|Os03g46310.1  
AT3G52240.1 Orysa4|Os05g37400.1,Orysa4|Os05g37340.1  
AT4G28260.1 Orysa4|Os10g35710.1  
AT3G19184.1 Orysa4|Os06g09420.1  
AT5G42700.1  
Orysa4|Os01g13300.1,Orysa4|Os03g08620.1,Orysa4|Os05g40280.1  
AT3G09210.1 Orysa4|Os03g61030.1  
AT4G29560.1 Orysa4|Os06g37570.1  
AT2G01590.1 Orysa4|Os09g13600.1  
AT5G39940.1 Orysa4|Os12g44160.1  
AT3G49890.1 Orysa4|Os03g10410.1  
AT1G34380.1 Orysa4|Os01g65400.1  
AT5G20935.1 Orysa4|Os07g06990.1  
AT5G02410.1 Orysa4|Os04g42490.1  
AT5G26940.1 Orysa4|Os03g18940.1,Orysa4|Os04g53200.1  
AT1G73380.1 Orysa4|Os10g34810.1  
AT2G41850.1,AT3G57510.1  
Orysa4|Os03g59330.1,Orysa4|Os07g10740.1,Orysa4|Os07g10680.1,Orysa4|Os07g10700.1  
AT1G23460.1,AT1G70500.1 Orysa4|Os02g03750.1  
AT1G48100.1 Orysa4|Os05g20020.1  
AT4G01890.1,AT1G02460.1 Orysa4|Os01g19170.1  
AT1G65570.1,AT1G05650.1,AT2G43860.1,AT2G43890.1,AT2G43870.1,AT1G05660.1,AT3G59850.1,AT2G43880.1  
Orysa4|Os01g66710.1,Orysa4|Os01g43490.1  
AT1G80170.1 Orysa4|Os05g46510.1  
AT3G07820.1,AT5G48140.1,AT3G07850.1,AT3G07840.1,AT3G07830.1,AT3G14040.1  
Orysa4|Os06g40890.1,Orysa4|Os06g35370.1,Orysa4|Os01g33300.1,Orysa4|Os06g35300.1,Orysa4|Os02g10300.1,Orysa4|Os06g35320.1  
AT4G18180.1 Orysa4|Os08g23790.1  
AT5G39910.1,AT3G07970.1,AT5G44840.1,AT3G15720.1,AT5G27530.1,AT4G35670.1  
AT4G32370.1,AT5G44830.1,AT4G32380.1,AT4G32375.1  
AT1G56710.1  
AT1G80140.1  
AT4G13760.1,AT1G78400.1,AT1G43090.1,AT2G26620.1,AT1G17150.1,AT1G43080.1,AT2G15460.1,AT1G43100.1,AT2G15450.1,AT2G15470.1,AT2G33160.1,AT2G40310.1  
AT1G02790.1  
Orysa4|Os07g10730.1  
Orysa4|Os01g22590.1  
Orysa4|Os11g14410.1  
Orysa4|Os11g14400.1  
Orysa4|Os06g40880.1  
AT2G02860.1 Orysa4|Os02g58080.1  
AT1G09960.1 Orysa4|Os12g44380.1  
AT1G66570.1,AT1G22710.1,AT5G06170.1,AT1G71880.1,AT2G14670.1,AT5G43610.1,AT1G71890.1  
Orysa4|Os10g26470.1,Orysa4|Os03g07480.1

AT2G15890.1 Orysa4|Os03g55680.1,Orysa4|Os03g55670.1  
AT1G55280.1 Orysa4|Os11g29900.1  
AT3G57440.1 Orysa4|Os07g46290.1  
AT2G35035.1 Orysa4|Os02g07670.1  
AT1G48360.1 Orysa4|Os06g07490.1  
AT2G20495.1 Orysa4|Os07g27460.1  
AT5G63480.1 Orysa4|Os04g31910.1  
AT3G48680.1,AT5G63510.1 Orysa4|Os02g30460.1  
AT1G47260.1 Orysa4|Os12g07220.1  
AT1G19580.1 Orysa4|Os01g18070.1  
AT5G66510.1  
AT2G38000.1 Orysa4|Os05g25210.1  
AT5G63690.1 Orysa4|Os07g37720.1,Orysa4|Os07g37710.1  
AT1G79260.1 Orysa4|Os01g48760.1  
AT4G37090.1 Orysa4|Os02g09380.1  
AT3G56860.1,AT2G41060.1 Orysa4|Os01g16090.1  
AT2G22090.2,AT2G22100.1  
Orysa4|Os06g20010.1,Orysa4|Os04g54440.1  
Orysa4|Os02g39060.1  
AT3G13062.2,AT1G55960.1 Orysa4|Os02g26860.1  
AT1G64720.1 Orysa4|Os02g03230.1,Orysa4|Os04g02910.1  
AT4G14500.1,AT3G23080.1 Orysa4|Os07g08760.1  
AT5G54170.1  
AT1G71110.1 Orysa4|Os01g03110.1  
AT2G12400.1 Orysa4|Os02g55590.1  
AT5G67550.1 Orysa4|Os11g16310.1  
AT2G25270.1  
AT1G80540.1  
Orysa4|Os02g09080.1,Orysa4|Os04g55110.1  
AT5G59950.1 Orysa4|Os03g17010.1  
AT1G66260.1,AT5G37720.1 Orysa4|Os06g14470.1,Orysa4|Os08g33120.1  
AT5G02530.1  
Orysa4|Os11g01020.1,Orysa4|Os12g01010.1  
Orysa4|Os07g13300.1  
AT3G52200.1 Orysa4|Os06g01630.1,Orysa4|Os02g01500.1,Orysa4|Os07g22720.1,Orysa4|Os06g30460.1  
AT1G54220.1,AT3G13930.1  
AT1G77480.1,AT1G44130.1 Orysa4|Os11g08100.1,Orysa4|Os12g07780.1  
AT4G33490.1  
Orysa4|Os11g08190.1,Orysa4|Os11g08200.1  
AT1G15290.1 Orysa4|Os04g55230.1  
AT3G52140.1 Orysa4|Os02g48620.1  
AT1G01320.1 Orysa4|Os07g23990.1  
AT4G28080.1  
Orysa4|Os02g15660.1  
AT1G78360.1,AT1G53680.1,AT1G17170.1,AT1G17180.1,AT1G78340.1,AT1G78370.1,AT1G78380.1,AT1G78320.1,A  
T1G17190.1 Orysa4|Os07g28480.1,Orysa4|Os09g20220.1  
AT2G29490.1,AT2G29420.1,AT3G09270.1 Orysa4|Os09g29200.1,Orysa4|Os05g34150.1  
AT1G10370.1,AT1G27130.1,AT1G10360.1,AT1G59700.1,AT1G59670.1,AT1G69930.1  
Orysa4|Os10g38580.1,Orysa4|Os10g38660.1,Orysa4|Os10g38630.1,Orysa4|Os10g38340.1,Orysa4|Os10  
g38590.1,Orysa4|Os10g38540.1,Orysa4|Os10g38489.1,Orysa4|Os10g38710.1,Orysa4|Os10g38610.1,Orysa4|Os01g  
49720.1,Orysa4|Os10g38730.1,Orysa4|Os10g38670.1,Orysa4|Os10g38690.1,Orysa4|Os10g38780.1,Orysa4|Os10g3  
8350.1,Orysa4|Os07g07320.1,Orysa4|Os10g38360.1,Orysa4|Os01g49710.1,Orysa4|Os10g38600.1,Orysa4|Os10g38  
640.1  
AT3G43800.1  
AT5G62480.1,AT1G74590.1  
AT2G29470.1,AT2G29460.1,AT2G29440.1,AT2G29450.1  
AT1G69920.1  
Orysa4|Os07g05800.1  
Orysa4|Os01g72160.1,Orysa4|Os01g72120.1,Orysa4|Os01g72170.1,Orysa4|Os03g39850.1,Orysa4|Os01  
g72140.1,Orysa4|Os01g72150.1  
Orysa4|Os12g02960.1  
Orysa4|Os11g03210.1  
Orysa4|Os10g38150.1,Orysa4|Os10g38140.1,Orysa4|Os10g38700.1,Orysa4|Os10g34020.1  
Orysa4|Os10g38189.1  
Orysa4|Os10g38314.1  
Orysa4|Os10g38720.1  
Orysa4|Os10g22310.1,Orysa4|Os01g37750.1,Orysa4|Os10g22070.1  
Orysa4|Os10g25590.1  
AT5G23390.1 Orysa4|Os02g42530.1  
AT1G48840.1,AT3G18350.1 Orysa4|Os05g17990.1,Orysa4|Os10g03830.1  
AT1G71240.1 Orysa4|Os01g64870.1  
AT2G21720.1 Orysa4|Os03g06180.1  
Orysa4|Os04g58100.1  
AT5G10190.1,AT1G78130.1  
Orysa4|Os09g20490.1,Orysa4|Os08g31670.1,Orysa4|Os09g20500.1,Orysa4|Os09g20480.1  
AT4G36790.1 Orysa4|Os07g10820.1,Orysa4|Os03g59450.1  
AT2G18590.1  
Orysa4|Os08g31700.1,Orysa4|Os09g20510.1  
Orysa4|Os08g31710.1  
Orysa4|Os09g20520.1  
AT5G13740.1,AT5G13750.1  
Orysa4|Os12g03860.1,Orysa4|Os12g03899.1,Orysa4|Os11g04020.1,Orysa4|Os11g04030.1,Orysa4|Os11

g04104.1  
AT3G43790.3  
Orysa4|Os12g03830.1,Orysa4|Os11g04060.1,Orysa4|Os12g03870.1  
Orysa4|Os07g08310.1  
AT5G39830.1 Orysa4|Os04g38640.1  
AT4G18370.1 Orysa4|Os12g42210.1  
AT3G27925.1 Orysa4|Os05g49380.1  
AT2G35510.1,AT1G32230.1 Orysa4|Os10g42710.1,Orysa4|Os03g63770.1  
AT5G62520.1,AT3G47720.1  
Orysa4|Os06g13860.1,Orysa4|Os04g57640.1  
Orysa4|Os03g12820.1  
AT5G04250.1 Orysa4|Os03g64219.1  
AT3G02070.1 Orysa4|Os04g32970.1  
AT5G03330.1  
Orysa4|Os02g57410.1  
AT5G53460.1 Orysa4|Os01g48960.1  
AT2G41220.1,AT5G04140.2 Orysa4|Os07g46460.1  
Orysa4|Os05g48200.1  
AT2G33570.1 Orysa4|Os06g41910.1,Orysa4|Os06g22330.1,Orysa4|Os02g48190.1  
AT3G07380.1,AT5G44670.1,AT5G48190.1,AT3G60990.1,AT4G20170.1  
AT5G46410.1 Orysa4|Os01g47540.1,Orysa4|Os01g43870.1  
AT1G29780.1,AT1G29770.1,AT5G45700.1 Orysa4|Os05g11570.1  
AT5G11860.1 Orysa4|Os07g10690.1,Orysa4|Os03g63300.1  
AT4G18140.1  
Orysa4|Os05g49120.1  
AT5G60360.1,AT3G45310.1 Orysa4|Os09g27030.1  
AT3G19390.1,AT5G43060.1,AT1G47128.1 Orysa4|Os04g57440.1,Orysa4|Os04g57490.1  
AT1G09850.1 Orysa4|Os05g43230.1  
AT3G48350.1,AT5G50260.1 Orysa4|Os08g44270.1  
AT2G21430.1,AT4G39090.1,AT4G16190.1 Orysa4|Os04g24600.1,Orysa4|Os02g27030.1  
AT4G35350.1,AT1G20850.1 Orysa4|Os01g73980.1,Orysa4|Os05g01810.1  
AT3G54940.3 Orysa4|Os07g29760.1  
AT1G06260.1  
AT3G43960.1,AT3G19400.1  
AT4G11320.1,AT4G23520.1,AT4G11310.1  
AT4G36880.1  
AT2G22160.1  
Orysa4|Os01g24560.1  
Orysa4|Os04g55650.1  
Orysa4|Os05g43600.1  
Orysa4|Os11g14900.1,Orysa4|Os01g67980.1  
Orysa4|Os09g39140.1,Orysa4|Os09g39060.1,Orysa4|Os09g39070.1,Orysa4|Os09g39110.1,Orysa4|Os09  
g39090.1,Orysa4|Os09g39160.1,Orysa4|Os09g39120.1,Orysa4|Os09g39100.1  
Orysa4|Os01g13920.1  
Orysa4|Os02g48450.1  
Orysa4|Os12g25680.1  
Orysa4|Os09g39170.1  
AT3G08490.1 Orysa4|Os03g11710.1  
AT5G42860.1,AT1G45688.1 Orysa4|Os04g59330.1  
AT4G35170.1  
Orysa4|Os02g44740.1  
Orysa4|Os06g06780.1,Orysa4|Os01g12820.1  
Orysa4|Os04g35130.1  
AT2G35605.1,AT3G03590.1 Orysa4|Os02g03730.1  
AT4G26810.1 Orysa4|Os09g04720.1  
AT3G19080.1 Orysa4|Os03g55570.1  
AT2G14880.1,AT4G34290.1 Orysa4|Os03g55310.1  
AT1G31760.1,AT3G48600.1  
AT1G49520.1  
AT5G22260.1 Orysa4|Os09g27620.1  
AT1G66170.1,AT2G01810.1 Orysa4|Os03g50780.1  
ATMG00550.1,AT2G07714.1  
AT3G62000.1,AT3G61990.1 Orysa4|Os08g05790.1  
AT4G34050.1 Orysa4|Os06g06980.1  
AT4G26220.1  
AT1G24735.1,AT1G67990.1,AT1G67980.1  
Orysa4|Os09g30360.1,Orysa4|Os08g38900.1,Orysa4|Os08g38920.1  
Orysa4|Os08g38910.1  
AT4G18160.1,AT5G46370.1 Orysa4|Os09g12790.1  
AT5G55630.1 Orysa4|Os07g01810.1,Orysa4|Os03g54100.1  
AT1G02510.1,AT4G01840.1  
AT5G46360.1  
AT3G51280.1 Orysa4|Os09g36740.1  
AT1G04770.1 Orysa4|Os05g43040.1  
AT5G44330.1,AT4G20900.1  
AT5G48850.1  
Orysa4|Os03g40840.1,Orysa4|Os08g03620.1  
AT3G51780.1 Orysa4|Os01g61500.1  
AT5G40630.1,AT5G14360.1 Orysa4|Os01g67950.1,Orysa4|Os02g38410.1,Orysa4|Os04g40680.1  
Orysa4|Os04g40790.1  
AT5G24400.1 Orysa4|Os08g43370.1,Orysa4|Os09g35970.1  
AT5G24420.1,AT3G49360.1,AT5G24410.1



AT3G27960.1 Orysa4|Os02g47880.1  
 AT4G10840.1 Orysa4|Os02g01960.1  
 AT2G31240.1 Orysa4|Os02g57470.1  
 AT1G27500.1  
     Orysa4|Os03g05540.1  
 AT5G47240.1 Orysa4|Os04g46280.1  
 AT5G47650.1 Orysa4|Os06g42790.1  
 AT4G25434.2  
 AT2G04450.1,AT4G12720.1,AT2G04430.1  
 AT2G04440.1  
     Orysa4|Os02g13350.1  
 AT3G58670.1,AT2G42670.1 Orysa4|Os04g06790.1  
 AT5G39890.1,AT5G15120.1 Orysa4|Os05g51470.1,Orysa4|Os01g40450.1  
 AT1G18490.1 Orysa4|Os08g03870.1,Orysa4|Os08g04010.1  
     Orysa4|Os09g14700.1  
     Orysa4|Os03g45250.1  
     Orysa4|Os08g37470.1  
     Orysa4|Os01g09030.1  
     Orysa4|Os03g45210.1  
 AT1G09910.1 Orysa4|Os08g44040.1,Orysa4|Os08g44020.1  
 AT4G37950.1,AT2G22620.1,AT4G38030.1  
 AT1G09880.1  
 AT4G24430.1  
 AT1G65210.1  
 AT1G09890.1  
 AT3G23510.1,AT3G23530.1 Orysa4|Os12g16650.1  
 AT3G23460.1,AT3G23470.1,AT3G23480.1  
     Orysa4|Os07g29220.1  
     Orysa4|Os12g16640.1,Orysa4|Os07g29200.1  
 AT3G14130.1,AT3G14150.1 Orysa4|Os07g42440.1  
 AT5G62930.1 Orysa4|Os10g33690.1  
 AT3G11210.1 Orysa4|Os11g48070.1  
 AT5G45920.1 Orysa4|Os01g11570.1  
 AT2G38180.1  
     Orysa4|Os06g06230.1  
     Orysa4|Os09g03490.1  
 AT2G01170.1 Orysa4|Os01g42234.1  
     Orysa4|Os01g71720.1,Orysa4|Os01g71710.1,Orysa4|Os01g71740.1,Orysa4|Os01g71700.1,Orysa4|Os01g71760.1  
     Orysa4|Os04g35540.1  
 AT2G21170.1 Orysa4|Os09g36450.1  
 AT3G55440.1 Orysa4|Os01g05490.1,Orysa4|Os01g62420.1  
 ATCG00150.1 Orysa4|Os10g38292.1  
 AT2G34780.1 Orysa4|Os01g56290.1  
 AT1G22275.1 Orysa4|Os04g37960.1  
 AT3G09770.1 Orysa4|Os10g13670.1,Orysa4|Os03g15000.1  
 AT5G19080.1,AT3G06140.1 Orysa4|Os05g33000.1  
 AT3G53410.1  
 AT5G03200.1  
 AT3G09180.1 Orysa4|Os01g15850.1  
 AT2G16630.1 Orysa4|Os02g01190.1  
     Orysa4|Os05g27970.1  
 AT5G62760.1 Orysa4|Os02g12360.1  
 AT5G19570.1 Orysa4|Os05g09600.1  
 AT4G12400.2,AT1G12270.1,AT1G62740.1 Orysa4|Os02g43020.1  
     Orysa4|Os06g06450.1,Orysa4|Os04g45480.1,Orysa4|Os06g06470.1  
 AT5G61530.1 Orysa4|Os07g30300.1  
 AT2G04620.1 Orysa4|Os08g32650.1  
 AT5G58170.1,AT5G58050.1 Orysa4|Os02g09450.1  
 AT5G55480.1,AT1G66980.1,AT4G26690.1,AT1G66970.1  
     Orysa4|Os04g39610.1,Orysa4|Os08g39350.1,Orysa4|Os02g37590.1  
 AT3G20520.1  
     Orysa4|Os12g27102.1  
     Orysa4|Os09g17000.1  
 AT4G29540.2 Orysa4|Os01g52400.1  
 AT1G69290.1,AT1G68980.1 Orysa4|Os01g57900.1  
 AT1G14840.1,AT2G01750.1,AT1G68060.1,AT1G24764.1 Orysa4|Os02g50320.1,Orysa4|Os06g14080.1  
     Orysa4|Os12g44340.1  
     Orysa4|Os03g11650.1  
 AT3G54630.1 Orysa4|Os08g36490.1  
 AT1G19870.1 Orysa4|Os04g56740.1  
 AT3G04880.1 Orysa4|Os01g36090.1  
 AT1G14150.1 Orysa4|Os02g36850.1  
 AT3G20660.1 Orysa4|Os04g53930.1  
 AT1G16390.1,AT1G79360.1 Orysa4|Os07g37530.1,Orysa4|Os01g22710.1,Orysa4|Os07g37510.1  
 AT1G16370.1,AT1G79410.1  
 AT1G73220.1  
     Orysa4|Os01g22700.1  
     Orysa4|Os07g37454.1  
     Orysa4|Os01g10240.1  
 AT1G19150.1 Orysa4|Os09g26810.1  
 AT1G76570.1 Orysa4|Os09g12540.1

AT4G10340.1 Orysa4|Os11g13890.1  
AT3G54890.1 Orysa4|Os06g21590.1  
AT1G29910.1,AT2G34430.1,AT1G29930.1,AT2G34420.1,AT1G29920.1  
Orysa4|Os01g52240.1,Orysa4|Os01g41710.1,Orysa4|Os09g17740.1  
AT3G08940.2,AT5G01530.1 Orysa4|Os07g37240.1  
AT1G15820.1 Orysa4|Os04g38410.1  
AT5G54270.1 Orysa4|Os07g37550.1  
AT1G61520.1 Orysa4|Os02g10390.1  
AT1G45474.1 Orysa4|Os02g52650.1  
AT2G40100.1  
AT1G77670.1 Orysa4|Os09g28050.1  
Orysa4|Os10g34350.1  
AT1G48200.1 Orysa4|Os06g05670.1  
AT1G17665.1 Orysa4|Os01g10080.1  
AT3G03150.1 Orysa4|Os04g50970.1  
AT4G02640.2,AT3G54620.1 Orysa4|Os07g08420.1,Orysa4|Os03g58250.1  
AT5G24800.1 Orysa4|Os06g45140.1,Orysa4|Os02g07840.1,Orysa4|Os02g16680.1  
AT5G28770.2  
Orysa4|Os12g40920.1  
AT1G79870.1 Orysa4|Os01g12830.1  
AT2G45630.2,AT1G12550.1  
Orysa4|Os04g01660.1,Orysa4|Os04g01600.1,Orysa4|Os04g01674.1,Orysa4|Os04g01650.1  
AT5G28310.1  
Orysa4|Os08g34570.1,Orysa4|Os07g40660.1  
AT5G63980.1 Orysa4|Os12g08280.1,Orysa4|Os12g08270.1  
AT5G54390.1 Orysa4|Os02g56170.1  
AT5G09290.1,AT5G64000.1,AT5G63990.1  
AT1G76700.1,AT1G21080.1 Orysa4|Os08g41110.1,Orysa4|Os09g32050.1  
AT4G39150.1,AT2G21510.1 Orysa4|Os01g50700.1,Orysa4|Os05g46620.1  
AT1G77020.1 Orysa4|Os02g35000.1  
AT4G08455.1 Orysa4|Os07g15490.1  
AT4G15890.1 Orysa4|Os12g36170.1  
AT1G71980.1 Orysa4|Os08g01360.1,Orysa4|Os03g07130.1  
AT1G22670.1  
AT1G35630.1,AT1G35625.1,AT4G09560.1  
AT5G66160.1  
AT5G35870.1,AT2G04480.1 Orysa4|Os12g31510.1  
AT1G19310.1 Orysa4|Os01g56070.1,Orysa4|Os03g47500.1,Orysa4|Os12g43930.1  
AT4G27470.1,AT4G03510.1,AT4G28270.1 Orysa4|Os02g42690.1,Orysa4|Os04g44820.1  
AT2G23780.1  
AT1G74990.1  
AT2G34310.1,AT1G29530.1 Orysa4|Os01g50450.1  
AT5G60940.1 Orysa4|Os03g54770.1  
AT5G42240.1,AT5G42230.1,AT1G43780.1 Orysa4|Os11g10750.1  
AT3G10410.1,AT3G45010.1 Orysa4|Os07g29620.1,Orysa4|Os02g02320.1  
AT3G63470.1,AT3G52020.1 Orysa4|Os07g46350.1  
AT2G24000.1,AT4G30610.1 Orysa4|Os02g55130.1  
AT1G15000.1  
Orysa4|Os05g50580.1,Orysa4|Os05g50570.1,Orysa4|Os01g43890.1,Orysa4|Os01g11670.1,Orysa4|Os05  
g50600.1  
AT5G23210.1 Orysa4|Os02g42310.1  
AT4G30810.1 Orysa4|Os06g08720.1  
AT3G17180.1 Orysa4|Os01g22980.1,Orysa4|Os05g06660.1,Orysa4|Os01g22954.1  
AT1G28110.1,AT2G33530.1 Orysa4|Os11g31980.1  
AT3G25420.1,AT4G12910.1 Orysa4|Os04g25560.1,Orysa4|Os12g15470.1  
AT2G12480.2  
AT5G22980.1  
AT5G22960.1  
AT3G52000.1,AT2G05850.1,AT3G52010.1  
AT3G56540.1  
AT3G02110.1  
AT2G24010.1  
AT5G08260.1  
AT1G61130.1  
AT4G15100.1,AT1G11080.1  
Orysa4|Os03g26920.1  
Orysa4|Os09g28840.1,Orysa4|Os09g28830.1  
Orysa4|Os03g09190.1  
Orysa4|Os03g26930.1  
Orysa4|Os06g36570.1  
Orysa4|Os10g39560.1  
Orysa4|Os06g51370.1  
Orysa4|Os04g32540.1  
Orysa4|Os02g26480.1  
AT1G36070.1,AT1G78070.2 Orysa4|Os03g26870.1  
AT3G13340.1,AT1G55680.1,AT5G56190.2 Orysa4|Os02g48964.1  
Orysa4|Os08g31560.1  
Orysa4|Os08g38880.1  
AT1G07770.1,AT3G46040.1,AT5G59850.1 Orysa4|Os02g27760.1,Orysa4|Os07g10720.1  
AT2G19720.1,AT4G29430.1 Orysa4|Os02g15610.1  
AT2G39590.1  
AT4G37480.1 Orysa4|Os03g55360.1

AT5G09510.1,AT5G09500.1,AT1G04270.1 Orysa4|Os03g58430.1,Orysa4|Os07g08660.1  
AT1G33850.1,AT5G09490.1,AT5G43640.1  
AT5G63070.1  
AT1G42990.1 Orysa4|Os06g41770.1  
AT5G20220.1 Orysa4|Os01g51710.1  
AT5G54500.1,AT4G27270.1 Orysa4|Os08g04460.1  
Orysa4|Os01g57570.1,Orysa4|Os05g42190.1  
AT2G45720.1 Orysa4|Os10g37850.1,Orysa4|Os03g02580.1  
AT2G05810.1 Orysa4|Os09g05030.1  
AT1G61350.1 Orysa4|Os07g37350.1  
AT5G50900.1  
AT1G01830.1  
Orysa4|Os02g06530.1  
AT5G15130.1 Orysa4|Os06g05380.1  
AT1G62300.1,AT4G04450.1,AT4G22070.1 Orysa4|Os05g49210.1,Orysa4|Os01g14440.1  
AT4G01720.1 Orysa4|Os05g04640.1  
AT1G18860.1  
AT1G69810.1  
Orysa4|Os01g18584.1  
Orysa4|Os04g04300.1  
Orysa4|Os01g18600.1  
AT4G29230.1 Orysa4|Os01g09550.1  
AT1G25580.1 Orysa4|Os06g15690.1  
AT5G56620.1  
Orysa4|Os05g10620.1  
Orysa4|Os06g36480.1  
Orysa4|Os04g40140.1  
AT2G48060.1 Orysa4|Os01g29220.1  
AT1G60230.1 Orysa4|Os01g45370.1  
AT2G39670.2 Orysa4|Os01g74190.1  
AT3G19630.1 Orysa4|Os03g10520.1  
AT4G26310.1 Orysa4|Os03g59160.1  
AT4G35460.1,AT2G17420.1 Orysa4|Os02g48290.1,Orysa4|Os06g22140.1  
AT2G41680.1 Orysa4|Os07g46410.1  
Orysa4|Os04g44260.1  
AT3G47850.1 Orysa4|Os05g13390.1  
AT3G04280.1,AT5G26594.1 Orysa4|Os03g53100.1  
Orysa4|Os04g13480.1  
AT3G25130.1 Orysa4|Os11g26990.1  
AT1G70200.1 Orysa4|Os02g22070.1  
AT5G36890.1 Orysa4|Os01g67220.1  
AT5G44640.1,AT5G42260.1,AT3G60130.1,AT2G44450.1,AT2G25630.1  
Orysa4|Os09g31430.1,Orysa4|Os04g39840.1,Orysa4|Os08g39860.1,Orysa4|Os04g39900.1,Orysa4|Os04  
g39864.1,Orysa4|Os04g39880.1  
AT3G18070.1,AT3G18080.1 Orysa4|Os01g32364.1  
AT1G26560.1 Orysa4|Os03g11420.1,Orysa4|Os10g17650.1  
AT4G27830.1,AT4G22100.1,AT1G02850.2,AT4G27820.1,AT1G60090.1  
Orysa4|Os01g70520.1,Orysa4|Os05g30390.1,Orysa4|Os01g59819.1,Orysa4|Os05g30250.1,Orysa4|Os05  
g30350.1  
AT4G21760.1,AT1G61810.1,AT1G61820.1 Orysa4|Os04g43360.1,Orysa4|Os04g43390.1  
AT1G51470.1,AT1G51490.1,AT1G47600.1  
AT5G28510.1,AT3G21370.1,AT3G09260.1,AT1G66270.1,AT2G44460.1,AT3G60120.1,AT3G03640.1,AT2G44490.1,A  
T1G75940.1,AT3G60140.1,AT2G32860.2,AT1G66280.1,AT5G24550.1,AT1G52400.1,AT5G24540.1  
AT5G26000.1,AT5G48375.1,AT5G25980.2  
AT2G44470.1  
AT2G44480.1  
AT5G54570.1  
AT5G16580.1,AT3G62740.1,AT1G45191.2,AT3G62750.1  
Orysa4|Os04g39814.1  
Orysa4|Os03g20710.1  
Orysa4|Os03g49600.1,Orysa4|Os03g49610.1  
Orysa4|Os12g23170.1  
Orysa4|Os05g30300.1,Orysa4|Os05g30280.1  
Orysa4|Os05g30320.1  
Orysa4|Os01g59840.1  
Orysa4|Os09g33710.1,Orysa4|Os09g33680.1  
Orysa4|Os04g43400.1  
Orysa4|Os04g43380.1,Orysa4|Os04g43410.1  
AT1G16360.1,AT1G79450.1,AT3G12740.1,AT1G54320.1 Orysa4|Os06g45430.1,Orysa4|Os02g07750.1  
AT5G46150.1 Orysa4|Os03g57170.1  
Orysa4|Os09g38768.1  
Orysa4|Os05g45370.1,Orysa4|Os03g02830.1  
AT5G04840.1 Orysa4|Os02g33560.1  
AT5G51680.1 Orysa4|Os03g03580.1  
AT1G79650.1,AT1G16190.1 Orysa4|Os02g08300.1  
AT3G02540.1,AT5G38470.1 Orysa4|Os06g15360.1  
AT5G16090.1  
Orysa4|Os08g21630.1,Orysa4|Os08g33340.1  
Orysa4|Os09g24200.1  
AT2G17975.1 Orysa4|Os04g02000.1  
AT3G01360.1 Orysa4|Os06g13160.1  
AT1G67195.1 Orysa4|Os08g32120.1,Orysa4|Os09g21240.1

AT5G17460.1 Orysa4|Os01g03500.1  
AT1G55265.1,AT5G19860.1 Orysa4|Os03g48626.1  
AT3G07470.1,AT3G07460.2 Orysa4|Os01g68500.1  
AT5G16380.1  
Orysa4|Os09g19340.1  
AT3G19650.1 Orysa4|Os03g10590.1  
AT4G15470.1 Orysa4|Os05g33360.1  
AT1G03070.1,AT4G02690.1,AT3G63310.1 Orysa4|Os03g53400.1  
Orysa4|Os03g58150.1  
Orysa4|Os07g08060.1  
Orysa4|Os11g37200.1  
AT2G44990.1 Orysa4|Os04g46470.1  
AT3G14430.1 Orysa4|Os08g41680.1  
AT5G19750.1 Orysa4|Os11g03670.1  
AT2G14860.1,AT4G33905.1 Orysa4|Os12g32330.1  
AT5G43140.1  
AT3G21290.1 Orysa4|Os03g08820.1  
AT3G47830.1 Orysa4|Os06g13070.1  
AT4G25520.1,AT5G62090.1 Orysa4|Os06g03600.1  
AT4G25515.1  
AT1G73020.1 Orysa4|Os01g51040.1  
AT2G39550.1 Orysa4|Os01g05680.1  
AT3G29330.1 Orysa4|Os10g17740.1  
AT4G01850.1,AT1G02500.1 Orysa4|Os05g04510.1,Orysa4|Os01g22010.1  
AT3G17390.1  
AT2G36880.1  
Orysa4|Os01g18860.1  
Orysa4|Os07g29440.1  
AT1G30950.1 Orysa4|Os06g45460.1  
AT2G17550.1 Orysa4|Os03g03860.1  
AT1G76550.1,AT1G20950.1 Orysa4|Os02g48360.1,Orysa4|Os06g22060.1  
Orysa4|Os08g25720.1,Orysa4|Os09g12650.1  
AT5G57420.1 Orysa4|Os04g55950.1  
AT4G26020.1 Orysa4|Os02g05520.1  
AT4G22140.1 Orysa4|Os09g21770.1,Orysa4|Os08g32620.1  
AT4G04260.1  
Orysa4|Os07g08880.1,Orysa4|Os03g58530.1  
AT3G08610.1 Orysa4|Os05g40300.1  
AT1G43245.1 Orysa4|Os04g34610.1  
AT4G02730.1 Orysa4|Os07g38430.1  
AT5G50230.1 Orysa4|Os03g53510.1  
AT5G16750.1 Orysa4|Os04g50660.1  
AT3G49660.1,AT2G41500.1,AT5G13480.1,AT5G67320.1,AT5G52820.1,AT5G64730.1  
Orysa4|Os03g48090.1,Orysa4|Os03g23909.1,Orysa4|Os07g22220.1,Orysa4|Os11g38170.1,Orysa4|Os06  
g44370.1,Orysa4|Os11g43890.1,Orysa4|Os03g51550.1,Orysa4|Os10g01540.1  
AT4G32990.1,AT2G26060.1,AT4G29830.1 Orysa4|Os07g14830.1,Orysa4|Os02g33860.1  
AT1G71840.1  
AT2G43770.1  
AT3G62200.1 Orysa4|Os07g44320.1  
AT3G62210.1,AT5G61190.1  
AT3G62050.1  
AT3G62460.1  
AT3G61100.1,AT4G30760.1,AT3G61090.1  
AT3G56730.1  
AT3G62850.1  
AT3G60940.1  
AT5G61180.1  
AT3G13280.1  
AT5G64450.1  
Orysa4|Os03g25420.1  
AT3G23660.1,AT1G05520.1,AT4G14160.2 Orysa4|Os11g24560.1  
AT5G43670.1 Orysa4|Os03g53140.1  
AT5G49100.1 Orysa4|Os02g32550.1,Orysa4|Os04g33260.1  
AT5G49740.1,AT5G49730.1 Orysa4|Os04g36720.1  
AT1G23020.1,AT5G23980.1,AT1G01590.1,AT5G23990.1,AT1G01580.1 Orysa4|Os04g48930.1  
AT5G50160.1  
AT5G17330.1 Orysa4|Os03g13300.1,Orysa4|Os03g51080.1  
AT1G65960.1  
AT2G02010.1,AT2G02000.1  
AT3G17760.1  
Orysa4|Os04g37500.1  
Orysa4|Os08g36320.1  
Orysa4|Os05g34840.1  
AT5G49800.1 Orysa4|Os11g14070.1  
AT1G49950.1 Orysa4|Os12g41920.1,Orysa4|Os01g40670.1  
AT1G17520.1,AT1G72740.1 Orysa4|Os01g51154.1  
AT5G67580.1,AT3G49850.1  
AT1G54260.1  
AT3G17590.1 Orysa4|Os02g49190.1  
AT5G25500.1 Orysa4|Os11g10110.1  
AT2G29660.1 Orysa4|Os03g15790.1  
AT1G75710.1 Orysa4|Os04g02510.1

Orysa4|Os11g06840.1,Orysa4|Os04g59380.1  
Orysa4|Os11g30340.1  
AT3G54390.1 Orysa4|Os09g38570.1  
AT1G15080.1 Orysa4|Os08g27040.1,Orysa4|Os09g13870.1,Orysa4|Os01g49820.1,Orysa4|Os08g27030.1  
AT3G02600.1 Orysa4|Os01g04660.1  
AT3G18220.1  
AT2G01180.1  
Orysa4|Os01g47580.1,Orysa4|Os05g47660.1  
AT4G24550.2 Orysa4|Os07g42810.1  
AT5G46630.2 Orysa4|Os02g46510.1  
AT4G11060.1 Orysa4|Os05g43440.1  
AT3G07640.1 Orysa4|Os02g37150.1  
AT3G25120.1 Orysa4|Os04g30740.1  
AT5G02740.1 Orysa4|Os03g17450.1  
AT5G59550.1,AT3G46620.1 Orysa4|Os05g01940.1,Orysa4|Os03g16480.1,Orysa4|Os01g74040.1  
AT2G15580.1 Orysa4|Os06g08250.1,Orysa4|Os02g55480.1  
AT2G40830.1,AT3G56580.1 Orysa4|Os03g22830.1  
AT5G20910.1 Orysa4|Os09g26400.1  
AT1G60360.1 Orysa4|Os06g10800.1,Orysa4|Os02g52870.1  
AT4G26400.1,AT5G56340.1,AT1G55530.1 Orysa4|Os03g59760.1  
AT5G01980.1 Orysa4|Os11g02670.1  
AT3G19950.1 Orysa4|Os06g01200.1,Orysa4|Os10g34590.1  
AT2G39720.1  
AT3G10815.1  
AT1G68180.1  
AT3G30460.1  
AT2G44330.1,AT3G60080.1  
AT2G29840.1,AT1G18760.1  
AT3G13430.1  
AT1G50350.1  
Orysa4|Os11g04680.1  
Orysa4|Os11g37230.1  
Orysa4|Os05g41520.1,Orysa4|Os01g58780.1  
Orysa4|Os03g20870.1  
Orysa4|Os01g16950.1  
Orysa4|Os12g04650.1  
Orysa4|Os03g26300.1  
Orysa4|Os06g05200.1  
Orysa4|Os05g40980.1  
Orysa4|Os12g04660.1,Orysa4|Os12g04460.1,Orysa4|Os12g04590.1,Orysa4|Os11g04690.1  
AT5G64290.1 Orysa4|Os09g29430.1,Orysa4|Os08g37600.1  
AT5G12860.1 Orysa4|Os12g33080.1  
AT5G64280.1  
AT4G03150.1 Orysa4|Os12g34880.1  
AT4G02230.1,AT1G02780.1,AT3G16780.1 Orysa4|Os03g38260.1,Orysa4|Os03g21940.1  
AT4G16030.1  
Orysa4|Os07g47430.1  
AT1G71740.1 Orysa4|Os02g11950.1  
AT1G25500.2 Orysa4|Os02g36960.1  
AT3G59980.1 Orysa4|Os04g23820.1  
AT2G40660.1 Orysa4|Os01g60660.1  
AT2G38140.1 Orysa4|Os05g09400.1  
AT1G19240.1 Orysa4|Os01g05140.1  
AT5G47540.1,AT4G17270.1 Orysa4|Os07g39630.1  
AT5G18940.1 Orysa4|Os03g24520.1,Orysa4|Os07g45280.1  
AT2G03410.1  
Orysa4|Os03g07600.1  
AT5G16020.1 Orysa4|Os01g42060.1  
AT1G08220.1 Orysa4|Os05g08410.1  
AT5G07380.1 Orysa4|Os01g01400.1  
AT3G07760.1 Orysa4|Os12g32992.1  
AT1G07645.1 Orysa4|Os03g16940.1  
AT3G11150.1 Orysa4|Os01g61440.1  
AT2G43540.1 Orysa4|Os04g41800.1  
AT5G08040.1 Orysa4|Os12g38650.1  
ATMG00640.1 Orysa4|Os12g14930.1  
AT4G00360.1,AT2G45970.1,AT1G63710.1,AT1G01600.1 Orysa4|Os04g47250.1,Orysa4|Os02g44654.1  
AT1G69500.1 Orysa4|Os03g07250.1  
AT3G56630.1,AT1G34540.1  
Orysa4|Os12g04110.1,Orysa4|Os01g59050.1,Orysa4|Os01g58950.1,Orysa4|Os01g58970.1,Orysa4|Os12g04100.1,Orysa4|Os01g59020.1,Orysa4|Os01g58990.1,Orysa4|Os01g58960.1,Orysa4|Os01g59000.1,Orysa4|Os11g04290.1,Orysa4|Os11g04310.1  
AT1G65340.1,AT5G52320.1,AT4G39480.1,AT1G57750.1,AT4G32170.1,AT2G21910.1,AT4G39510.1,AT2G23180.1,AT4G39490.1,AT5G02900.1,AT4G39500.1,AT1G47620.1  
Orysa4|Os03g04640.1,Orysa4|Os03g04660.1,Orysa4|Os03g04530.1,Orysa4|Os03g04650.1,Orysa4|Os03g04630.1  
AT5G23190.1,AT5G08250.1 Orysa4|Os10g34480.1  
AT1G24540.1,AT3G26125.1,AT1G13140.1,AT1G13150.1 Orysa4|Os02g38290.1  
AT2G45510.1,AT2G44890.1 Orysa4|Os06g03930.1  
AT2G27690.1 Orysa4|Os01g63930.1,Orysa4|Os05g37250.1,Orysa4|Os11g05380.1,Orysa4|Os12g05440.1  
AT5G58860.1 Orysa4|Os01g63540.1  
AT5G63450.1,AT3G48520.1 Orysa4|Os11g29290.1,Orysa4|Os12g25660.1

AT1G66030.1  
 AT3G01900.1  
     Orysa4|Os01g72270.1,Orysa4|Os03g12260.1,Orysa4|Os01g72260.1  
     Orysa4|Os04g05060.1  
     Orysa4|Os10g36320.1  
     Orysa4|Os10g03290.1  
     Orysa4|Os08g16260.1,Orysa4|Os08g16320.1  
     Orysa4|Os05g08850.1,Orysa4|Os01g08800.1  
     Orysa4|Os08g16430.1  
     Orysa4|Os10g38090.1,Orysa4|Os10g38120.1,Orysa4|Os04g48460.1,Orysa4|Os10g38110.1  
     Orysa4|Os05g31740.1  
 AT5G65640.1,AT5G10570.1      Orysa4|Os10g39750.1,Orysa4|Os03g04310.1  
 AT1G12860.1,AT3G26744.1      Orysa4|Os11g32100.1  
 AT2G16910.1      Orysa4|Os02g02820.1  
     Orysa4|Os01g70310.1  
     Orysa4|Os07g36460.1  
 AT3G26360.1      Orysa4|Os03g48830.1  
 AT4G37445.1      Orysa4|Os02g03430.1  
 AT5G04010.1      Orysa4|Os01g58670.1  
 AT5G02810.1      Orysa4|Os03g17570.1,Orysa4|Os07g49460.1  
 AT2G46790.1,AT5G24470.1      Orysa4|Os09g36220.1,Orysa4|Os11g05930.1  
 AT5G61380.1      Orysa4|Os02g40510.1  
 AT5G60100.1  
 AT2G46670.1  
 AT3G52070.1      Orysa4|Os03g11780.1  
 AT2G22300.1      Orysa4|Os07g43030.1,Orysa4|Os10g22950.1,Orysa4|Os03g09100.1  
 AT1G67310.1      Orysa4|Os04g31900.1  
 AT5G64220.1,AT5G09410.1  
     Orysa4|Os01g69910.1  
 AT2G48120.1      Orysa4|Os05g32680.1  
 AT1G32150.1,AT2G35530.1      Orysa4|Os12g13170.1  
 AT4G01120.1,AT2G46270.1      Orysa4|Os05g49420.1,Orysa4|Os01g46970.1  
 AT4G36730.1  
     Orysa4|Os07g10890.1  
     Orysa4|Os03g13614.1  
     Orysa4|Os02g03580.1  
 AT5G04080.1      Orysa4|Os05g31470.1  
 AT2G01905.1      Orysa4|Os03g13480.1  
 AT5G65880.1      Orysa4|Os03g47240.1  
 AT4G21720.1      Orysa4|Os04g58380.1  
 AT5G17810.1      Orysa4|Os07g48560.1,Orysa4|Os08g14400.1,Orysa4|Os03g20910.1  
 AT5G05770.1,AT3G11260.1      Orysa4|Os01g63510.1  
 AT5G45980.1,AT2G33880.1      Orysa4|Os01g47710.1,Orysa4|Os05g48990.1  
 AT3G03660.1  
 AT5G46010.1  
     Orysa4|Os07g34880.1  
 AT5G04320.1,AT3G10440.1      Orysa4|Os02g55570.1  
 AT5G16950.1      Orysa4|Os06g08510.1  
 AT1G07985.1      Orysa4|Os03g42520.1  
 AT1G14610.1      Orysa4|Os03g21740.1,Orysa4|Os03g48850.1,Orysa4|Os03g02100.1  
 AT1G27160.1  
 AT5G16715.1  
 AT4G30480.2      Orysa4|Os10g34540.1  
 AT4G32070.1,AT2G25290.1      Orysa4|Os09g38390.1  
 AT1G62390.1      Orysa4|Os09g04990.1  
 AT5G20360.1  
     Orysa4|Os09g03890.1,Orysa4|Os08g20020.1  
 AT2G25570.1      Orysa4|Os02g10820.1  
 AT2G15020.1      Orysa4|Os03g25850.1  
 AT1G53460.1      Orysa4|Os01g10630.1  
 AT1G18850.1      Orysa4|Os01g02170.1  
 AT3G15780.1,AT1G52550.1      Orysa4|Os01g29740.1

A-M OGs in similarity approach  
 ArabidopsisMoss  
 AT5G02070.1,AT1G79670.1,AT1G21230.1,AT5G66790.1,AT3G53840.1,AT1G16120.1,AT1G69730.1,AT1G79680.1  
     Phypa1|36771,Phypa1|1927  
 AT1G06700.1,AT3G59350.1,AT2G43230.1,AT2G30740.1,AT2G30730.1      Phypa1|27190,Phypa1|36902  
 AT2G24360.1,AT4G31170.1      Phypa1|27841,Phypa1|26765  
 AT5G15080.1,AT3G01300.1,AT3G28690.2      Phypa1|32364,Phypa1|39336  
 AT5G50180.1,AT3G27560.1,AT5G40540.1      Phypa1|23862,Phypa1|39443  
 AT2G19130.1      Phypa1|28702  
 AT1G01540.2,AT4G02630.1,AT4G01330.1      Phypa1|35546,Phypa1|1407  
 AT2G17700.1,AT4G38470.1,AT4G35780.1  
     Phypa1|36295,Phypa1|28003,Phypa1|38284,Phypa1|37174,Phypa1|29480,Phypa1|26089  
 AT5G01550.1,AT3G53380.1,AT3G08870.1,AT4G02410.1,AT1G70110.1,AT5G03140.1,AT4G02420.1,AT5G10530.1,A  
 T5G42120.1,AT1G15530.1,AT5G59260.1,AT5G55830.1,AT3G55550.1,AT2G37710.1,AT4G29050.1,AT3G53810.1,AT  
 4G04960.1 Phypa1|37371,Phypa1|1382  
 AT4G00955.1,AT2G23450.1      Phypa1|527,Phypa1|2927  
 AT1G11050.1      Phypa1|36615,Phypa1|458  
 AT2G43850.1,AT3G58760.1,AT2G31800.1,AT4G18950.1,AT3G59830.1      Phypa1|6349,Phypa1|30416  
 AT1G55200.1,AT3G13690.1,AT5G56790.1      Phypa1|36645,Phypa1|37982

AT1G10620.1,AT5G38560.1,AT1G70460.1,AT1G23540.1 Phypa1|39084,Phypa1|38828  
AT2G48010.1 Phypa1|30618,Phypa1|30356  
AT3G21630.1 Phypa1|23,Phypa1|27406  
AT5G18610.1 Phypa1|35327,Phypa1|27774,Phypa1|30856,Phypa1|27775  
AT2G18890.1 Phypa1|982,Phypa1|27750,Phypa1|36116  
AT4G25390.1,AT2G45590.1,AT5G51770.1 Phypa1|28174,Phypa1|450  
AT4G35230.1 Phypa1|28386,Phypa1|24905,Phypa1|19585,Phypa1|27871,Phypa1|31711  
AT1G28390.1,AT3G51990.1 Phypa1|38678,Phypa1|514  
AT3G15890.1,AT1G52540.1 Phypa1|29922,Phypa1|25006,Phypa1|30061  
AT3G63260.1,AT3G01490.1,AT5G50000.1,AT3G22750.1,AT4G14780.1 Phypa1|18552,Phypa1|38542  
AT5G59700.1,AT4G39110.1,AT3G46290.1,AT5G54380.1,AT2G21480.1  
Phypa1|36278,Phypa1|907,Phypa1|908  
AT4G00330.1  
Phypa1|17896,Phypa1|24628,Phypa1|39320,Phypa1|39647,Phypa1|39181,Phypa1|10185,Phypa1|24927  
AT5G54590.2 Phypa1|35990,Phypa1|25178  
AT2G20300.1,AT5G56890.1  
Phypa1|1768,Phypa1|30197,Phypa1|1366,Phypa1|1771,Phypa1|27354,Phypa1|1772  
AT1G62400.1 Phypa1|29373,Phypa1|25237,Phypa1|544,Phypa1|28625  
AT5G63940.1,AT1G77280.1,AT1G21590.1 Phypa1|27676,Phypa1|29088,Phypa1|29200  
AT3G59420.1 Phypa1|31867  
AT1G49730.1,AT3G19300.1 Phypa1|425  
AT1G80640.1,AT4G32000.1,AT5G11020.1,AT2G25220.1 Phypa1|1855  
AT2G33580.1,AT2G23770.1 Phypa1|30303,Phypa1|1903,Phypa1|27411  
AT1G34300.1 Phypa1|3810  
AT5G03320.1,AT3G09830.1,AT2G39110.1,AT2G28940.2 Phypa1|526,Phypa1|37611,Phypa1|525,Phypa1|25457  
AT1G14000.1 Phypa1|20733,Phypa1|27337  
AT1G52310.1 Phypa1|26283,Phypa1|30565  
AT4G02010.1 Phypa1|37111,Phypa1|27765,Phypa1|30858  
AT1G16150.1,AT1G16160.1,AT1G19390.1,AT1G21240.1,AT1G16260.1,AT4G31100.1,AT1G16110.1,AT1G21270.1,AT1G21210.1,AT1G21250.1,AT1G16140.1,AT3G25490.1,AT1G17910.1,AT1G16130.1  
AT4G31110.1  
AT3G57750.1,AT3G57730.1,AT3G57720.1  
AT2G47060.4,AT3G17410.1,AT1G48210.1,AT3G62220.1  
AT2G41970.1  
AT1G48220.1  
AT2G17220.1,AT3G55450.1,AT1G14370.1,AT4G35600.1,AT2G28930.1,AT1G76360.1,AT2G02800.1,AT1G07570.1,A  
T5G02290.1  
AT2G07180.1,AT5G01020.1  
AT4G17660.1  
AT2G39660.1  
AT1G26970.1,AT1G69790.1  
AT5G11410.1,AT5G11400.1  
AT5G56460.1  
AT5G25440.1  
AT1G72540.1,AT2G26290.1,AT2G05940.1,AT5G35580.1  
AT1G74490.1  
AT1G65250.1  
AT5G11360.1  
AT1G61590.1  
AT3G50720.1,AT5G66710.1,AT3G50730.1  
AT5G01850.1  
AT1G11300.1,AT1G61490.1,AT1G61610.1,AT1G61360.1,AT1G65800.1,AT1G61440.1,AT1G61500.1,AT4G03230.1,A  
T4G27290.1,AT4G27300.1,AT1G61400.1,AT1G61480.1,AT4G21390.1,AT1G11350.1,AT1G11330.1,AT1G65790.1,AT1G11280.1,AT4G21370.1,AT1G61550.1,AT1G61420.1,AT1G61430.1,AT1G61390.1,AT1G61370.1,AT4G21380.1,AT1G61380.1  
AT5G35370.1  
AT1G66920.1,AT5G24080.1,AT1G66910.1,AT5G38260.1  
AT3G12000.1,AT4G00340.1,AT4G11900.1  
AT1G67000.1  
AT5G60900.1  
AT5G39370.1,AT2G01780.1  
AT5G18470.1  
AT1G09440.1,AT2G42960.1,AT5G18500.1,AT3G17420.1,AT1G56720.1,AT3G59110.1  
AT4G34500.1  
AT2G30940.2  
AT2G43690.1,AT1G70130.1  
AT5G26150.1,AT2G07020.1,AT5G51270.1,AT5G61560.1,AT5G12000.1,AT5G61550.1,AT1G16760.1,AT3G20200.1,A  
T5G35380.1  
AT1G18390.1,AT1G25390.1,AT5G38210.1  
AT1G66880.1  
AT2G46850.1  
AT1G52290.1,AT1G26150.1,AT4G34440.1,AT2G18470.1,AT3G24550.1,AT1G49270.1,AT3G24540.1,AT3G18810.1  
AT2G28250.1  
AT1G65190.1  
AT1G33260.1  
AT3G45920.1  
AT1G51940.1  
AT1G07870.1,AT2G28590.1,AT5G02800.1  
AT1G61860.1,AT3G20530.1  
AT5G60090.1,AT5G16500.1,AT3G02810.1  
AT1G76370.1,AT5G13160.1,AT1G20650.1  
AT4G13190.1,AT3G24790.1,AT3G07070.1

AT3G58690.1  
 AT1G24030.1  
 AT3G26940.1  
 AT5G35960.1,AT5G18910.1,AT5G10520.1,AT3G05140.1,AT5G65530.1  
 AT5G57670.1  
 AT1G80870.1  
 AT3G54030.1,AT5G59010.1,AT5G41260.1,AT4G00710.1  
 AT2G17170.1,AT2G17090.1  
 AT1G01740.1  
 AT1G50990.1  
 AT5G46570.1  
 AT5G01060.1,AT3G09240.1  
 AT1G63500.1  
 AT5G23170.1  
 AT5G61350.1  
 AT5G39000.1,AT5G38990.1,AT5G39020.1,AT5G28680.1,AT5G39030.1,AT3G51550.1,AT3G04690.1  
 AT1G30570.1  
 AT2G23200.1,AT5G24010.1,AT2G39360.1  
 AT3G57770.1  
 AT2G11520.1  
 AT5G58940.1  
 AT4G25160.1  
 AT5G15730.1  
 AT2G19410.1  
 AT3G46930.1,AT5G58950.1  
 AT1G66460.1,AT5G37790.1  
 AT4G35030.1,AT2G16750.1  
 AT5G47850.1,AT3G57710.1,AT3G09780.1,AT2G39180.1  
 AT3G55950.1  
 AT5G22050.2  
 AT4G10390.1  
 AT3G01840.1  
 AT4G32300.1  
 AT2G41890.1  
 AT5G47070.1  
 AT3G26700.1  
 AT5G60080.1  
 AT1G54820.1  
 AT1G22720.1  
 Phypa1|1897,Phypa1|95,Phypa1|138  
 Phypa1|9681  
 Phypa1|1434  
 Phypa1|445,Phypa1|26153,Phypa1|1782,Phypa1|25781  
 Phypa1|1885,Phypa1|39010,Phypa1|2273,Phypa1|2272,Phypa1|1042  
 Phypa1|1618  
 Phypa1|1610  
 Phypa1|595  
 Phypa1|670,Phypa1|662  
 Phypa1|28697  
 Phypa1|21916,Phypa1|27895,Phypa1|1906  
 Phypa1|28445  
 Phypa1|26029,Phypa1|26381  
 Phypa1|27647  
 Phypa1|38602,Phypa1|37033,Phypa1|586  
 Phypa1|29667  
 Phypa1|16242  
 Phypa1|29525,Phypa1|25375  
 Phypa1|1373  
 Phypa1|7882  
 Phypa1|29531  
 Phypa1|2620  
 Phypa1|29354,Phypa1|1940,Phypa1|25831  
 Phypa1|28905,Phypa1|128  
 Phypa1|1894,Phypa1|642,Phypa1|1890  
 Phypa1|28210  
 Phypa1|30256  
 Phypa1|26908,Phypa1|977,Phypa1|28104  
 Phypa1|28699,Phypa1|30331  
 Phypa1|37534  
 AT4G27800.1 Phypa1|24715,Phypa1|25832  
 AT2G20630.2,AT4G28400.1,AT3G15260.1 Phypa1|29915  
 AT2G40860.1 Phypa1|23828  
 AT5G24940.1,AT5G10740.1,AT4G31750.1 Phypa1|28654,Phypa1|17075,Phypa1|36131  
 AT3G51470.1,AT2G25620.1,AT2G33700.1 Phypa1|33023,Phypa1|27142,Phypa1|26514  
 AT1G22280.1,AT1G78200.1,AT1G34750.1  
 AT2G34740.1  
 AT3G23360.1  
 AT1G07160.1,AT1G67820.1,AT4G08260.1,AT2G40180.1,AT3G27140.1,AT2G30020.1  
 AT5G53140.1  
 AT3G63340.1  
 AT1G43900.1  
 AT1G18030.1



AT3G62260.2,AT1G48040.1,AT3G17250.1  
Phypa1|29697  
Phypa1|2075  
Phypa1|33973  
Phypa1|3814  
Phypa1|36824  
AT5G38895.1,AT5G15790.1,AT5G41350.1,AT3G02290.1 Phypa1|387,Phypa1|1326  
AT4G00335.1,AT4G23450.1  
AT4G09820.1,AT1G63650.1,AT5G41315.1,AT4G00480.1 Phypa1|25614,Phypa1|37802,Phypa1|28544,Phypa1|3725  
AT4G17550.1 Phypa1|2550,Phypa1|59  
AT3G47420.1,AT4G25220.1,AT1G30560.1  
AT2G13100.1  
AT5G50930.1 Phypa1|29366  
AT5G61000.1,AT5G08020.1 Phypa1|39460  
AT2G06510.1 Phypa1|438,Phypa1|29151  
AT4G19130.1,AT5G45400.1  
AT1G56260.1 Phypa1|30077  
AT2G33150.1,AT1G04710.1 Phypa1|26411,Phypa1|38706  
AT5G48880.3  
Phypa1|30805,Phypa1|3067,Phypa1|3087,Phypa1|30031  
AT3G08780.1 Phypa1|24138  
AT1G70480.2,AT1G23560.1 Phypa1|36885,Phypa1|27076,Phypa1|34035  
AT1G23590.1,AT1G23600.1,AT1G23630.1,AT1G23570.1,AT1G23670.2,AT1G23520.1,AT1G23510.1,AT1G23660.1,A  
T1G23690.1,AT1G23580.1,AT2G27670.1  
AT1G23610.1  
Phypa1|24639,Phypa1|214  
Phypa1|3490  
AT3G20770.1,AT2G27050.1 Phypa1|24875,Phypa1|27196  
AT5G21120.1  
AT5G65100.1,AT5G10120.1  
AT1G73730.1  
AT5G07950.1 Phypa1|6106  
AT4G05390.1,AT1G30510.2 Phypa1|24193,Phypa1|15265,Phypa1|37220  
AT5G66190.1,AT1G20020.1  
Phypa1|17879  
Phypa1|9645  
ATCG00160.1 Phypa1|28991  
Phypa1|31132  
AT5G39960.1 Phypa1|38038  
AT3G06190.1,AT5G19000.1 Phypa1|39626,Phypa1|28967,Phypa1|39152  
AT5G21010.1,AT3G03740.1,AT3G43700.1  
AT2G39760.1  
AT1G01040.1 Phypa1|38419  
AT3G43920.1 Phypa1|27074  
AT4G15417.1,AT3G20420.1  
AT5G45150.1  
Phypa1|33058  
Phypa1|34570,Phypa1|28303  
Phypa1|9075  
AT1G50910.1 Phypa1|33017  
AT5G57800.1 Phypa1|24073,Phypa1|37963,Phypa1|38034  
AT1G02190.1,AT2G37700.1,AT1G02205.2  
Phypa1|36196  
AT3G20880.1,AT3G57670.1,AT1G51220.1 Phypa1|1543,Phypa1|28946  
AT1G34790.1  
AT1G08290.1  
AT1G13290.1  
AT3G18310.1 Phypa1|9811  
AT5G03650.1,AT2G36390.1 Phypa1|38262,Phypa1|26370,Phypa1|36690  
AT3G20440.1 Phypa1|37575  
Phypa1|6316  
AT1G03310.1 Phypa1|38673  
AT4G09020.1 Phypa1|36215  
AT2G39930.1 Phypa1|36375  
AT3G25570.1,AT3G02470.1,AT5G15950.1  
Phypa1|37596,Phypa1|39604,Phypa1|25551,Phypa1|25539,Phypa1|37595,Phypa1|37513  
AT5G18930.1  
AT3G50380.1 Phypa1|33155  
AT5G37290.1 Phypa1|10475  
AT5G45720.1,AT4G24790.1,AT1G14460.1,AT2G02480.1 Phypa1|21,Phypa1|24591,Phypa1|1090  
AT4G18820.1  
AT1G05060.1 Phypa1|2633  
AT5G01520.1,AT3G47160.1 Phypa1|36499,Phypa1|37388,Phypa1|9186  
AT1G24440.1,AT1G13195.1,AT5G58787.1  
ATCG01300.1,ATCG00840.1 Phypa1|31411  
AT1G77760.1,AT1G37130.1 Phypa1|26472,Phypa1|36835,Phypa1|38645  
AT1G68680.1 Phypa1|38151  
AT4G01790.1 Phypa1|32610  
AT4G34880.1 Phypa1|30595  
AT3G07440.1 Phypa1|33522  
AT4G30150.1 Phypa1|34211  
AT5G17840.1 Phypa1|30084

AT3G27820.1 Phypa1|37816  
AT3G52880.1,AT5G03630.1,AT3G09940.1 Phypa1|38866,Phypa1|34719,Phypa1|37728  
AT1G63940.2  
AT4G28210.1 Phypa1|35588  
AT2G44120.2,AT2G01250.1,AT3G13580.1 Phypa1|32237,Phypa1|31650,Phypa1|24202,Phypa1|39429  
Phypa1|2528,Phypa1|24413  
AT5G49830.1,AT1G10385.1 Phypa1|30415,Phypa1|16,Phypa1|27274  
AT1G10180.1  
Phypa1|29485,Phypa1|39458,Phypa1|30204  
Phypa1|1762  
AT4G26370.1 Phypa1|2019  
AT5G47940.1 Phypa1|34320  
AT3G09810.1,AT5G03290.1 Phypa1|36866,Phypa1|37570  
AT2G17130.1,AT4G35650.1,AT4G35260.1 Phypa1|2875,Phypa1|29035,Phypa1|27494  
AT1G32480.1  
Phypa1|21568  
Phypa1|30477,Phypa1|26965  
AT4G19070.1 Phypa1|34907  
AT5G17870.1 Phypa1|33350  
AT4G37510.1 Phypa1|35083  
AT5G15200.1,AT5G39850.1  
Phypa1|38876,Phypa1|38249,Phypa1|2939,Phypa1|31842,Phypa1|36570,Phypa1|36483  
Phypa1|35495  
Phypa1|16116  
AT1G19340.1 Phypa1|38442  
AT1G28560.1 Phypa1|2331  
ATCG00120.1 Phypa1|31038  
ATMG01190.1,AT2G07698.1  
Phypa1|1508  
AT1G19910.1,AT1G75630.1,AT2G16510.1,AT4G38920.1,AT4G34720.1  
Phypa1|2410,Phypa1|36465,Phypa1|39311,Phypa1|24387,Phypa1|36466  
AT1G74340.1 Phypa1|29570  
AT5G42290.1 Phypa1|341  
AT3G25540.1,AT1G13580.2 Phypa1|24993,Phypa1|25399  
Phypa1|10771,Phypa1|28128  
Phypa1|15298,Phypa1|28326  
AT3G53620.1,AT1G01050.1,AT2G46860.1 Phypa1|31024,Phypa1|26162,Phypa1|29961,Phypa1|28194  
AT2G18230.1  
AT4G01480.1  
AT5G40870.1,AT3G27190.1 Phypa1|27087,Phypa1|32014,Phypa1|35850  
AT3G27440.1,AT1G55810.1  
AT4G26510.1  
Phypa1|21910,Phypa1|31476  
Phypa1|38043  
AT3G23570.1,AT3G23600.1 Phypa1|26476  
Phypa1|29347,Phypa1|29740  
AT2G36490.1,AT3G10010.1 Phypa1|25034  
AT5G04560.1  
Phypa1|29201,Phypa1|30863  
Phypa1|4789  
AT4G24280.1,AT5G49910.1 Phypa1|24674,Phypa1|28358,Phypa1|28363  
AT1G79930.1,AT1G79920.1 Phypa1|33247,Phypa1|32005,Phypa1|36416  
AT5G28540.1,AT5G42020.1 Phypa1|18732,Phypa1|39245  
AT4G37910.1,AT5G09590.1 Phypa1|37500,Phypa1|36637,Phypa1|36638,Phypa1|28736  
AT4G16660.1 Phypa1|25715  
AT3G09440.1,AT5G02490.1,AT5G02500.1,AT3G12580.1  
Phypa1|38513,Phypa1|39775,Phypa1|27394,Phypa1|39629,Phypa1|31529  
AT1G11660.1  
AT1G09080.1  
AT2G32120.1  
AT1G56410.1  
Phypa1|1536  
Phypa1|417  
Phypa1|16573  
Phypa1|16996  
Phypa1|11245,Phypa1|18934  
Phypa1|2368,Phypa1|30224  
Phypa1|29535,Phypa1|27405  
Phypa1|3176  
AT1G56190.1,AT3G12780.1,AT1G79550.1 Phypa1|34630,Phypa1|38634,Phypa1|2937,Phypa1|17010  
Phypa1|30806  
AT1G32400.1 Phypa1|37555,Phypa1|32961,Phypa1|26634  
AT2G20740.1  
AT2G20230.1,AT4G28770.1  
Phypa1|2069,Phypa1|2089  
AT1G25230.1,AT2G01890.1,AT2G01880.1,AT3G17790.1,AT1G14700.1  
Phypa1|33523,Phypa1|24855,Phypa1|27178  
AT1G54130.1,AT3G14050.1 Phypa1|29324,Phypa1|38120,Phypa1|36100,Phypa1|29327  
Phypa1|25092  
AT3G61690.1,AT3G51620.2 Phypa1|34012  
AT2G40520.1  
Phypa1|12956,Phypa1|13042

AT3G59940.1,AT2G44130.1  
Phypa1|23671,Phypa1|30509,Phypa1|1942,Phypa1|24008,Phypa1|1941,Phypa1|25377,Phypa1|159  
AT1G80440.1,AT1G15670.1  
Phypa1|34732  
AT1G23310.1,AT1G70580.1 Phypa1|23833,Phypa1|39619,Phypa1|24002  
AT1G17290.1,AT1G72330.1 Phypa1|24723,Phypa1|27840  
AT5G13650.2 Phypa1|3874,Phypa1|27991  
AT2G31060.2 Phypa1|39076  
Phypa1|30945,Phypa1|23605  
AT3G17940.1 Phypa1|39121  
AT3G01260.1,AT3G47800.1,AT5G15140.1  
AT4G15560.1 Phypa1|7691,Phypa1|36037,Phypa1|23731,Phypa1|28157  
AT3G21500.2  
AT5G11380.1  
Phypa1|22231  
AT4G03210.1,AT5G13870.1  
Phypa1|39570,Phypa1|24562,Phypa1|24533,Phypa1|24072,Phypa1|28566,Phypa1|37433,Phypa1|6123  
AT2G01850.1,AT1G14720.1,AT4G18990.1,AT1G10550.1,AT1G32170.1 Phypa1|24622,Phypa1|1462  
AT4G14130.1,AT5G57540.1,AT4G30290.1,AT4G25810.1,AT2G18800.1,AT4G25820.1,AT5G57560.1,AT5G57550.1,A  
T3G23730.1,AT4G30270.1,AT4G30280.1,AT5G57530.1,AT5G48070.1,AT2G06850.1,AT1G65310.1  
AT2G14620.1  
AT1G11545.1,AT4G37800.1,AT5G65730.1  
AT4G13080.1,AT4G13090.1,AT3G25050.1  
AT2G36870.1,AT3G44990.1  
AT3G48580.1  
AT4G28850.1  
Phypa1|29901,Phypa1|2483,Phypa1|27055,Phypa1|28178,Phypa1|39182,Phypa1|14556,Phypa1|29629,P  
hypa1|29769,Phypa1|39361,Phypa1|24105,Phypa1|39569,Phypa1|39763,Phypa1|22183  
Phypa1|27242  
Phypa1|25241  
Phypa1|1492,Phypa1|28828  
Phypa1|24852  
Phypa1|24421  
AT3G58810.1,AT2G46800.1,AT3G61940.1 Phypa1|2775  
AT2G29410.1  
Phypa1|31162,Phypa1|31302  
Phypa1|25586  
AT3G14950.1,AT1G53300.1,AT3G58620.1,AT2G42580.1 Phypa1|36381,Phypa1|28582,Phypa1|29970  
AT5G10090.1,AT5G65160.1,AT1G78120.1  
AT1G73110.1 Phypa1|30353  
AT2G39730.1 Phypa1|37749,Phypa1|24123,Phypa1|29505,Phypa1|34615,Phypa1|34614  
AT2G28880.1 Phypa1|37342  
AT3G55870.1,AT2G29690.1,AT5G05730.1 Phypa1|37367,Phypa1|26952,Phypa1|28372  
Phypa1|22472  
Phypa1|23420  
AT3G16970.1,AT3G17080.1,AT5G12060.1,AT1G04645.1,AT4G16195.1,AT5G12070.1,AT4G24975.1,AT3G57840.1  
Phypa1|4531  
Phypa1|1278  
AT5G61510.1 Phypa1|24151,Phypa1|8099  
AT4G21580.1 Phypa1|37193  
Phypa1|36531  
Phypa1|31106  
Phypa1|30603  
Phypa1|29518  
Phypa1|3056  
AT1G29120.1 Phypa1|37144,Phypa1|26509  
AT5G51180.1,AT4G25770.1,AT1G10040.1 Phypa1|28115  
Phypa1|28312  
AT1G65290.1 Phypa1|24169,Phypa1|23695,Phypa1|23801  
AT5G47630.1,AT2G44620.1  
Phypa1|39189  
AT1G30820.1,AT3G12670.1,AT4G20320.1 Phypa1|37066,Phypa1|39196  
AT2G34890.1  
AT4G02120.1  
Phypa1|31310  
AT1G51550.1 Phypa1|27221,Phypa1|503  
AT1G68050.1,AT2G18915.2,AT5G57360.1  
AT3G01311.1,AT1G59710.1,AT3G28630.1,AT1G69890.1 Phypa1|24866,Phypa1|27837,Phypa1|36900  
AT1G69900.1,AT1G27100.1  
AT5G51570.1 Phypa1|23832  
AT5G62740.1,AT1G69840.1 Phypa1|36205,Phypa1|38060  
AT3G01290.1  
AT4G27060.1,AT1G50890.1 Phypa1|28752,Phypa1|20447,Phypa1|36513,Phypa1|903  
AT1G59850.1,AT1G27210.1,AT5G62580.1  
AT2G07170.1  
AT3G51260.1,AT5G66140.1 Phypa1|34904,Phypa1|36153,Phypa1|39752,Phypa1|24920  
AT1G47250.1,AT5G42790.1 Phypa1|24550,Phypa1|37201  
AT2G25430.1,AT4G32285.1 Phypa1|36871,Phypa1|29839,Phypa1|23677  
AT1G05020.1,AT1G03050.1,AT4G02650.1  
AT2G03680.1,AT1G69230.1 Phypa1|6913,Phypa1|23704,Phypa1|23767  
AT4G23496.1  
AT5G15600.1,AT3G02180.1

Phypa1|27901  
AT1G17980.1 Phypa1|24468,Phypa1|1378  
AT2G25850.2,AT4G32850.8  
AT3G06560.1  
AT5G19590.1 Phypa1|36021  
AT1G02813.1,AT4G02360.1,AT4G02370.1,AT1G02816.1  
AT1G48090.1,AT4G17140.1 Phypa1|34840,Phypa1|19254,Phypa1|31975  
AT4G17130.1  
AT4G17120.1,AT4G17110.1  
Phypa1|16277  
AT4G39660.1 Phypa1|36314  
AT2G38400.1,AT3G08860.1  
AT1G70330.1 Phypa1|36316,Phypa1|36410  
AT3G09990.1,AT4G05130.1,AT4G05140.1,AT4G05110.1,AT1G61630.1,AT4G05120.1 Phypa1|24725  
Phypa1|39063  
AT4G18890.1,AT1G78700.1 Phypa1|35441,Phypa1|35451  
AT1G75080.1,AT1G19350.3,AT3G50750.1  
AT4G36780.1  
AT3G02360.1 Phypa1|36715,Phypa1|39738,Phypa1|37211,Phypa1|24145  
AT1G64190.1,AT5G41670.1  
Phypa1|26528  
Phypa1|10201  
AT1G14970.1,AT1G35510.1,AT1G38131.1,AT2G01480.1 Phypa1|4407,Phypa1|26107,Phypa1|38202  
AT1G22460.1 Phypa1|26176,Phypa1|26963,Phypa1|38786  
AT3G03810.1,AT3G30300.1 Phypa1|27741  
AT5G65470.1,AT4G24530.1 Phypa1|29081  
AT1G62330.1,AT1G11990.1 Phypa1|27569,Phypa1|2726  
AT2G03280.2,AT1G14020.1,AT3G02250.1,AT5G15740.1 Phypa1|29963  
AT3G26370.1 Phypa1|28637  
AT2G37980.1,AT5G35570.1,AT3G54100.1  
Phypa1|34655,Phypa1|29729,Phypa1|28031,Phypa1|26154,Phypa1|26685  
AT1G20550.1,AT4G38390.1,AT1G76270.1 Phypa1|25555,Phypa1|30749,Phypa1|24858  
AT1G52630.1 Phypa1|30336  
AT1G04910.1 Phypa1|26920  
AT1G38065.1  
AT5G64600.1  
AT5G63390.1,AT3G07900.1,AT2G44500.1  
AT1G29200.1  
AT5G01100.1  
AT4G16650.1  
Phypa1|27034  
AT5G24810.1 Phypa1|36850,Phypa1|33596  
AT5G08670.1,AT5G08680.1,AT5G08690.1 Phypa1|29904,Phypa1|14478,Phypa1|39173  
ATCG00480.1  
Phypa1|31474  
AT1G31880.1,AT1G54180.1,AT1G54190.1,AT2G35600.1,AT3G14000.1,AT5G20540.1 Phypa1|32520  
AT2G21030.1  
Phypa1|28939  
AT5G45775.2,AT3G58700.1,AT4G18730.1,AT2G42740.1  
Phypa1|36431,Phypa1|36391,Phypa1|39419,Phypa1|36571,Phypa1|37800,Phypa1|2498  
Phypa1|19759  
Phypa1|26237  
AT5G06370.1 Phypa1|36485  
AT3G02700.1,AT5G16360.1,AT5G16330.1  
AT1G01225.1,AT4G00905.1  
AT3G18215.1,AT5G24600.1 Phypa1|37890  
AT5G24790.1,AT5G10580.1,AT4G31330.1 Phypa1|1125,Phypa1|11746  
AT5G46060.1  
AT5G43180.1  
AT2G18460.2,AT2G20130.1,AT2G20120.1 Phypa1|38599,Phypa1|27944,Phypa1|37175,Phypa1|26280  
AT1G43130.1  
AT3G50790.1 Phypa1|28564,Phypa1|29895  
AT5G49950.1,AT1G34340.1 Phypa1|29318,Phypa1|2512  
AT4G24220.1 Phypa1|23705  
AT5G58750.1  
Phypa1|23153  
AT2G29710.1,AT2G29740.1,AT3G21750.1,AT3G16520.3,AT3G21780.1,AT1G01390.1,AT4G15280.1,AT1G07250.1,AT1G07240.1,AT3G21790.1,AT3G21760.1,AT4G15260.1,AT3G21800.1,AT2G29750.1,AT1G07260.1,AT4G01070.1,AT2G29730.1,AT1G01420.1 Phypa1|32773,Phypa1|27332  
AT3G46670.1,AT1G22360.1,AT1G22340.1,AT1G22400.1,AT1G22370.2,AT1G78270.1,AT3G46660.1,AT1G22380.1  
Phypa1|35951,Phypa1|988  
AT1G05560.1,AT2G36970.1,AT2G23250.1,AT4G15500.1,AT3G21560.1,AT2G28080.1,AT1G05530.1,AT2G31790.1,AT2G23210.1,AT4G15480.1,AT2G43840.1,AT2G43820.1,AT2G23260.1  
AT1G73880.1,AT1G06000.1,AT2G16890.2,AT4G34131.1,AT2G36800.1,AT5G03490.1,AT5G14860.1,AT1G51210.1,AT3G53160.1,AT2G36750.1,AT2G36760.1,AT2G36790.1,AT4G34138.1,AT2G36770.1,AT2G15480.1,AT4G34135.1,AT2G15490.1,AT2G36780.1  
AT2G30150.1,AT2G30140.1  
AT3G11340.1,AT2G26480.1,AT5G05870.1,AT5G37950.1,AT5G05890.1,AT5G05900.1,AT5G05860.1  
AT3G53150.1  
AT5G17030.1,AT3G50740.1,AT1G30530.1  
AT4G15270.1  
AT1G10400.1

AT5G54060.1,AT5G49690.1,AT5G65550.1  
AT5G66690.1,AT5G26310.1,AT4G36770.1  
AT3G02100.1,AT5G38040.1,AT3G22250.1,AT3G55700.1,AT5G59580.1,AT2G31750.1,AT5G59590.1  
AT1G24100.1,AT4G15490.1,AT4G15550.1,AT4G14090.1  
AT5G17050.1,AT3G46720.1,AT3G46700.1,AT3G46650.1,AT3G46690.1,AT5G17040.1,AT3G46680.1,AT5G05880.1,A  
T3G55710.1,AT5G38010.1  
Phypa1|26163,Phypa1|92  
Phypa1|1177,Phypa1|39428  
Phypa1|37149,Phypa1|29979  
Phypa1|4970,Phypa1|32724  
Phypa1|37612  
AT2G01060.1 Phypa1|34848,Phypa1|35115  
AT1G32240.1,AT5G16560.1,AT4G17695.1 Phypa1|33811  
AT4G13640.2,AT3G24120.2  
Phypa1|36064,Phypa1|6171,Phypa1|39318,Phypa1|2024,Phypa1|2299,Phypa1|923  
AT4G28610.1,AT5G29000.2,AT2G20400.1  
AT5G42630.1  
AT1G69580.1,AT3G04030.2,AT5G18240.1  
AT3G12730.1,AT1G79430.2  
AT2G06020.1  
AT5G45580.1  
Phypa1|35853,Phypa1|33088  
Phypa1|13973,Phypa1|20499  
Phypa1|32419,Phypa1|8109  
Phypa1|1081  
AT2G34520.1 Phypa1|28093  
AT3G27380.1,AT5G40650.1 Phypa1|191  
AT5G65165.1  
Phypa1|3021  
AT4G19380.1 Phypa1|24711,Phypa1|36614  
AT3G23410.1,AT4G28570.1,AT1G03990.1  
Phypa1|26220  
AT5G18280.1,AT3G04080.1 Phypa1|26014,Phypa1|36024,Phypa1|38153  
AT4G34660.1 Phypa1|25714,Phypa1|37494,Phypa1|2674,Phypa1|34584  
AT4G39020.1  
AT4G18060.1  
AT1G31440.1  
Phypa1|24498,Phypa1|28055,Phypa1|577  
Phypa1|37639  
AT1G69620.1,AT3G28900.1,AT1G26880.1  
Phypa1|36407,Phypa1|24158,Phypa1|2417,Phypa1|37576,Phypa1|36405,Phypa1|38780  
Phypa1|1661  
AT4G33510.1,AT4G39980.1,AT1G22410.1  
Phypa1|36193,Phypa1|29425,Phypa1|35926,Phypa1|25830,Phypa1|35645,Phypa1|36399  
Phypa1|38783  
AT1G20630.1,AT4G35090.1 Phypa1|39708,Phypa1|3732  
AT1G20620.4  
Phypa1|19383,Phypa1|22970  
Phypa1|2374  
Phypa1|39469  
Phypa1|30027  
Phypa1|37875,Phypa1|17025,Phypa1|24506  
Phypa1|31462  
AT3G02890.1,AT5G16680.1 Phypa1|10370  
AT1G33970.1,AT4G09940.1,AT4G09950.1 Phypa1|24310  
AT4G09930.1  
AT5G47270.1,AT1G33900.1,AT1G33890.1,AT1G33910.1,AT1G33960.1,AT2G26820.1,AT1G33930.1,AT1G33950.1  
AT1G33830.1,AT1G33880.1,AT1G33870.1  
AT4G11160.1 Phypa1|38789  
AT1G17220.1 Phypa1|36628  
Phypa1|29234  
Phypa1|22649,Phypa1|31134  
Phypa1|10847  
AT1G20220.1,AT1G72080.1,AT1G76010.1 Phypa1|31738,Phypa1|27346,Phypa1|38300  
AT3G50000.1,AT2G23080.1,AT5G67380.1 Phypa1|29245,Phypa1|36684,Phypa1|28524,Phypa1|39214  
AT2G23070.1  
AT5G47210.1,AT4G17520.1,AT4G16830.1 Phypa1|32771,Phypa1|24261,Phypa1|2564  
Phypa1|7997  
AT3G15560.1 Phypa1|35318  
AT3G15550.1  
Phypa1|28333,Phypa1|27070,Phypa1|26244,Phypa1|27727,Phypa1|29515,Phypa1|29864,Phypa1|28078  
Phypa1|18038  
AT1G07620.1 Phypa1|504  
AT5G18570.1 Phypa1|24454  
Phypa1|31335,Phypa1|31460  
Phypa1|33945  
AT2G17780.1,AT4G35920.1 Phypa1|27626,Phypa1|120  
Phypa1|27631  
Phypa1|664  
AT5G17420.1 Phypa1|38872,Phypa1|25542,Phypa1|38971,Phypa1|34735,Phypa1|23752,Phypa1|38199  
AT4G38190.1,AT5G16910.1,AT3G03050.1  
Phypa1|29364,Phypa1|24047,Phypa1|33789,Phypa1|36608,Phypa1|37742,Phypa1|38965,Phypa1|36732,

Phypa1|29902  
AT4G15320.1,AT2G32530.1,AT4G39350.1,AT2G32620.1,AT2G32540.1,AT2G32610.1,AT4G18780.1,AT2G21770.1,A  
T5G05170.1,AT4G15290.1,AT2G25540.1,AT5G09870.1,AT5G64740.1,AT4G32410.1  
AT5G44030.1  
AT2G33100.1  
AT1G32180.1  
AT1G55850.1,AT4G24000.1,AT4G23990.1,AT4G24010.1  
AT1G02730.1  
Phypa1|25109  
Phypa1|18016  
AT3G21175.1,AT1G51600.1 Phypa1|2683,Phypa1|33786,Phypa1|29195,Phypa1|628  
AT4G24470.1  
AT3G24650.1 Phypa1|13983,Phypa1|31627,Phypa1|34367  
AT1G28300.1,AT3G26790.1  
Phypa1|1708,Phypa1|29948  
Phypa1|1705,Phypa1|1302,Phypa1|24620  
Phypa1|1713  
AT3G12390.1 Phypa1|31001,Phypa1|27867,Phypa1|24200,Phypa1|24846  
AT4G10480.1,AT3G49470.1,AT1G33040.1  
AT5G13850.1  
Phypa1|31700  
AT4G32330.1,AT2G35880.1,AT2G25480.1  
Phypa1|1172,Phypa1|1173,Phypa1|19475,Phypa1|4406,Phypa1|737,Phypa1|27731,Phypa1|259  
Phypa1|736  
AT4G34240.1,AT1G44170.1 Phypa1|36763,Phypa1|29621  
Phypa1|33575,Phypa1|36236,Phypa1|13070  
Phypa1|31141  
AT1G64280.1,AT4G19660.1,AT5G45110.1,AT4G26120.1 Phypa1|35873,Phypa1|1390  
Phypa1|35874  
AT5G21105.1,AT5G21100.1 Phypa1|19140,Phypa1|28843,Phypa1|33091,Phypa1|3294,Phypa1|14002  
AT2G38080.1,AT2G46570.1,AT5G48100.1,AT5G01190.1,AT5G03260.1,AT5G60020.1,AT2G30210.1,AT5G58910.1,A  
T5G07130.1,AT2G40370.1,AT1G18140.1,AT2G29130.1,AT5G01040.1,AT3G09220.1,AT5G05390.1,AT5G01050.1,AT  
5G09360.1 Phypa1|2926  
AT4G39830.1  
Phypa1|23518,Phypa1|20908  
Phypa1|2400  
Phypa1|36128,Phypa1|36894  
Phypa1|23495  
Phypa1|1159  
Phypa1|26947  
AT5G27120.1,AT3G05060.1 Phypa1|23726,Phypa1|31765  
AT3G12860.1,AT1G56110.1 Phypa1|38273,Phypa1|27227  
AT5G27140.1  
Phypa1|3537  
AT5G11060.1,AT1G62990.1,AT5G25220.1,AT4G32040.1 Phypa1|26957,Phypa1|2880  
AT1G52700.1,AT1G52695.1,AT3G15650.1,AT5G20060.1 Phypa1|25482  
AT1G47780.1,AT1G51300.1,AT1G47786.1  
AT1G52460.1  
AT1G70980.1,AT5G56680.1 Phypa1|2657,Phypa1|23821  
AT4G17300.1 Phypa1|25526  
AT1G68420.1  
AT5G38750.1  
AT3G07420.1  
Phypa1|30593  
AT3G03610.1 Phypa1|23738  
AT1G67400.1,AT3G60260.1,AT3G43400.1,AT1G03620.1,AT2G44770.1  
AT4G34940.1,AT4G36030.1,AT5G66200.1 Phypa1|3041,Phypa1|2917,Phypa1|1790  
AT3G26600.1  
AT2G28190.1 Phypa1|13435,Phypa1|2465  
AT1G08830.1 Phypa1|36138,Phypa1|23794  
AT5G18100.1  
Phypa1|31357  
AT1G79950.1 Phypa1|24513  
AT1G20750.1,AT2G05635.1,AT1G20720.1 Phypa1|11475  
AT2G20800.1,AT4G21490.1,AT4G05020.1,AT4G28220.1 Phypa1|36370,Phypa1|36701,Phypa1|27066  
Phypa1|8510  
AT5G15910.1,AT5G10730.1 Phypa1|2012,Phypa1|2009  
AT1G32220.1 Phypa1|27511,Phypa1|28394  
AT1G29965.1,AT3G14600.1,AT2G34480.1  
Phypa1|39259,Phypa1|38546,Phypa1|38636,Phypa1|3932,Phypa1|37024,Phypa1|38766  
AT4G30510.1 Phypa1|23788  
AT3G62770.2 Phypa1|2644,Phypa1|25470,Phypa1|26028  
AT5G05150.1,AT2G40810.1,AT3G56440.1  
AT4G22270.1,AT3G20300.1,AT4G03820.2,AT1G50630.1  
Phypa1|23911,Phypa1|12598,Phypa1|24644,Phypa1|37787,Phypa1|28060  
AT1G67570.1  
AT2G21080.1  
AT5G17230.1 Phypa1|37554,Phypa1|19484,Phypa1|39081  
AT5G57030.1 Phypa1|28362,Phypa1|24861  
AT3G10230.1 Phypa1|26424,Phypa1|28464  
AT1G01650.1,AT1G63690.1 Phypa1|37192,Phypa1|24303,Phypa1|39046,Phypa1|27520  
AT1G05820.1

AT2G43070.1  
Phypa1|11200  
AT1G49740.1,AT5G67130.1,AT3G19310.1 Phypa1|25665,Phypa1|30340,Phypa1|26581  
AT1G13680.1  
Phypa1|10860  
AT1G07230.1 Phypa1|29221  
AT2G26870.1  
AT3G03540.1,AT3G03520.1,AT3G03530.1  
AT3G48610.1  
Phypa1|38887,Phypa1|36471,Phypa1|29715  
AT2G36620.1,AT3G53020.1  
Phypa1|36655,Phypa1|38663,Phypa1|3964,Phypa1|33162,Phypa1|39119,Phypa1|36793  
AT2G38025.1 Phypa1|28995  
AT3G57810.2 Phypa1|38767,Phypa1|1466  
Phypa1|26433,Phypa1|2215  
AT3G48560.1 Phypa1|25667,Phypa1|23781  
Phypa1|31181,Phypa1|22610  
Phypa1|4073,Phypa1|34436,Phypa1|31095  
Phypa1|31085  
Phypa1|30953  
Phypa1|1696  
AT5G26860.1,AT3G05780.1,AT3G05790.1 Phypa1|24605  
AT5G47040.1 Phypa1|32269  
Phypa1|9053  
Phypa1|30885  
Phypa1|10548,Phypa1|9052  
AT2G40470.1,AT2G30340.1 Phypa1|1563,Phypa1|779  
AT1G31320.1 Phypa1|770,Phypa1|277,Phypa1|28824  
AT3G03760.1 Phypa1|2142,Phypa1|754,Phypa1|1077,Phypa1|241  
AT3G27650.1,AT5G63090.1 Phypa1|1212,Phypa1|791,Phypa1|794,Phypa1|792  
AT1G36000.1,AT2G19510.1  
AT3G26660.1,AT2G30130.1,AT3G26620.1  
AT2G28500.1,AT1G07900.1  
AT1G16530.1  
AT4G00220.1,AT2G45410.1,AT2G45420.1  
AT2G42430.1,AT3G58190.1  
AT5G06080.1  
AT2G31310.1  
AT4G00210.1  
AT2G42440.1  
AT1G65620.1  
AT4G22700.1,AT5G35900.1,AT2G23660.1,AT3G11090.1,AT5G66870.1  
AT3G27940.1,AT3G50510.1  
Phypa1|768  
Phypa1|837,Phypa1|1214  
AT5G25360.1,AT3G15770.1,AT1G15350.1 Phypa1|38009,Phypa1|36277  
AT5G03440.1  
AT3G54880.1  
Phypa1|1344,Phypa1|30292  
AT1G79340.1,AT1G79330.1,AT1G79310.1,AT1G79320.1 Phypa1|28528,Phypa1|26069  
AT5G04200.1,AT1G16420.1  
Phypa1|26086  
Phypa1|38053  
Phypa1|3407  
AT1G76140.1,AT1G20380.1 Phypa1|39518,Phypa1|38012,Phypa1|24895,Phypa1|36286  
Phypa1|9259,Phypa1|36634  
Phypa1|3706  
AT1G05000.1,AT4G03960.1,AT2G32960.1 Phypa1|37764  
AT5G16480.1,AT3G02800.1  
Phypa1|27625,Phypa1|39168,Phypa1|23947,Phypa1|23803  
Phypa1|29586  
Phypa1|24093  
AT5G13500.1 Phypa1|38586,Phypa1|39138  
AT2G25260.1,AT5G25265.1  
AT5G22920.1 Phypa1|26149,Phypa1|29529,Phypa1|38046,Phypa1|28321  
AT5G25560.1  
AT3G62970.1,AT5G18650.1  
Phypa1|26288  
AT3G22290.1 Phypa1|31905  
AT1G36050.1,AT1G22200.1 Phypa1|25933,Phypa1|36775  
Phypa1|2649,Phypa1|38268  
AT2G23093.1 Phypa1|36001,Phypa1|24950  
AT3G49310.1,AT4G27720.1,AT1G64650.1 Phypa1|38204,Phypa1|36453,Phypa1|38298  
AT5G24490.1 Phypa1|25684,Phypa1|39271  
AT1G25141.1,AT1G24793.1,AT1G24880.1,AT1G25054.1,AT1G25210.1 Phypa1|24318  
AT5G43330.1,AT1G04410.1 Phypa1|37720  
AT5G56720.1  
AT1G67830.1,AT5G14450.1,AT3G26430.1,AT4G01130.1 Phypa1|25602  
AT3G62280.1,AT3G27950.1,AT1G54790.2,AT3G05180.1,AT1G56670.1,AT1G09390.1  
Phypa1|1023,Phypa1|39791,Phypa1|4097  
AT5G45910.1,AT3G48460.1,AT1G28650.1,AT1G28660.1,AT1G28610.2  
AT1G28670.1,AT1G28600.1,AT1G31550.2,AT1G28590.1,AT1G28570.1,AT1G28580.1

Phypa1|10865  
Phypa1|16989,Phypa1|30983,Phypa1|4733  
Phypa1|29186  
Phypa1|27851,Phypa1|35421  
AT1G06900.1 Phypa1|26016  
AT2G41790.1,AT3G57470.1 Phypa1|8461,Phypa1|27932  
AT5G01440.1  
AT3G57460.1  
Phypa1|26135  
Phypa1|2672,Phypa1|28836  
AT5G48385.1 Phypa1|38180  
AT5G16320.1,AT1G31814.1  
AT4G00650.1  
AT5G27230.1  
AT3G18520.2 Phypa1|29930,Phypa1|28246  
AT5G61060.1,AT5G61070.1,AT5G61050.1 Phypa1|6951  
AT4G17390.1,AT4G16720.1  
Phypa1|37355,Phypa1|38189,Phypa1|36345,Phypa1|39085,Phypa1|38720,Phypa1|38390  
AT1G20840.1,AT3G51490.1,AT4G35300.1 Phypa1|28426,Phypa1|4615,Phypa1|30562,Phypa1|914  
AT3G13050.1 Phypa1|27972  
Phypa1|30721  
Phypa1|24738,Phypa1|37450  
AT3G07100.1 Phypa1|39787,Phypa1|39636  
AT4G32640.1,AT3G44340.1 Phypa1|9114,Phypa1|26498  
Phypa1|6599  
AT5G22220.1 Phypa1|25914,Phypa1|38899,Phypa1|30290,Phypa1|36191  
AT2G36010.2  
AT1G47870.1  
AT1G29160.1,AT2G34140.1 Phypa1|30419,Phypa1|28297  
AT5G02460.1,AT2G46590.2,AT3G55370.2,AT4G24060.1,AT3G50410.1,AT1G51700.1,AT3G47500.1,AT4G21050.1,AT3G21270.1,AT1G26790.1,AT2G28510.1,AT1G64620.1,AT2G37590.1,AT2G28810.1,AT5G60200.1,AT3G61850.1,AT1G69570.1,AT4G21040.1,AT5G62430.1,AT1G47655.1,AT1G07640.3,AT5G65590.1,AT3G52440.1,AT1G28310.2,AT1G21340.1,AT5G60850.1,AT5G62940.1,AT4G38000.1,AT3G45610.1,AT4G21080.1,AT5G39660.1,AT5G66940.1,AT4G21030.1,AT4G00940.1  
Phypa1|33929,Phypa1|32525,Phypa1|1677,Phypa1|1688,Phypa1|28592,Phypa1|1686,Phypa1|1675,Phypa1|1678,Phypa1|15102,Phypa1|1687,Phypa1|1565,Phypa1|1685,Phypa1|1674,Phypa1|1676,Phypa1|27798,Phypa1|34610  
AT4G24740.1,AT3G53570.1 Phypa1|28054,Phypa1|27483,Phypa1|39711  
AT4G32660.1  
AT5G06780.1,AT3G12140.3,AT5G13020.1,AT2G44440.1 Phypa1|12141,Phypa1|27599  
AT1G03950.1 Phypa1|34442,Phypa1|28385,Phypa1|2488  
AT2G06530.1 Phypa1|36543  
AT5G44560.1  
Phypa1|24330  
AT4G02080.1,AT1G56330.1,AT3G62560.1 Phypa1|37496,Phypa1|38188  
AT1G09180.1  
AT1G02620.1  
Phypa1|2430,Phypa1|38547  
AT5G37460.1,AT5G37470.1,AT5G37650.1,AT4G16530.1,AT5G37920.1,AT5G37410.1,AT5G37400.1,AT4G09440.1,AT5G37420.1,AT5G37430.1 Phypa1|34659  
Phypa1|5764  
AT3G09600.1,AT5G52660.2,AT5G02840.1 Phypa1|1070,Phypa1|16161  
AT4G01280.2,AT1G01520.1  
Phypa1|34231  
Phypa1|14722  
AT4G27890.1,AT5G53400.1 Phypa1|2529,Phypa1|25902  
Phypa1|2325  
Phypa1|19489  
Phypa1|5739  
AT3G21430.1 Phypa1|32344  
AT3G21440.1,AT5G27610.1,AT3G05380.2  
AT3G23160.1 Phypa1|37384,Phypa1|969  
AT5G51670.1  
AT5G04550.1  
Phypa1|10908  
AT5G07090.1,AT2G17360.1,AT5G58420.1  
Phypa1|37856,Phypa1|36408,Phypa1|38505,Phypa1|39750,Phypa1|36857,Phypa1|3402  
Phypa1|12855  
AT1G76340.1 Phypa1|37097  
AT5G19980.1 Phypa1|38276,Phypa1|38551,Phypa1|602  
AT3G10330.1,AT2G41630.1 Phypa1|25717,Phypa1|28280  
AT5G39230.1,AT4G10680.1,AT3G29380.1  
AT3G57370.1  
AT3G46960.1 Phypa1|39693  
AT1G59760.1 Phypa1|36737  
AT2G06990.1 Phypa1|36612  
AT5G35360.1 Phypa1|25180,Phypa1|4220,Phypa1|24755  
AT1G03090.2 Phypa1|36156  
Phypa1|30007  
Phypa1|30937  
AT3G19850.1,AT3G22104.1,AT1G50280.1 Phypa1|27915,Phypa1|26606,Phypa1|16387,Phypa1|1395,Phypa1|73  
AT5G48130.1 Phypa1|939,Phypa1|30655,Phypa1|1799



AT5G64330.1 Phypa1|24  
AT1G30440.1,AT5G03250.1 Phypa1|452,Phypa1|23907  
AT1G03010.1,AT2G47860.1  
AT2G14820.1,AT2G23050.1,AT3G26490.1,AT5G67440.1,AT4G37590.1,AT1G67900.1  
AT2G30520.1,AT5G67385.1  
AT1G52770.1,AT3G15570.1  
AT3G08660.1,AT3G08570.1  
AT3G49970.1  
AT5G48800.1  
AT5G10250.1  
AT3G03510.1  
AT5G47800.1  
AT3G49900.1  
AT3G44820.1  
AT5G17580.1  
AT5G66560.1,AT3G50840.1  
AT5G13600.1  
Phypa1|950  
AT1G10570.1,AT1G60220.1 Phypa1|35407,Phypa1|16010,Phypa1|33602,Phypa1|34606  
AT1G09730.1,AT4G33620.1  
Phypa1|11086  
AT5G02630.1,AT5G18520.1,AT3G09570.1 Phypa1|28245,Phypa1|36365,Phypa1|26521  
AT5G42090.1  
AT3G10840.1 Phypa1|28022  
AT1G15490.1,AT1G52750.1,AT1G80280.1 Phypa1|37563,Phypa1|37124,Phypa1|29071,Phypa1|2694  
AT2G40095.1,AT3G55880.2  
AT4G12110.1,AT4G22756.1,AT4G22753.1 Phypa1|10138,Phypa1|37868  
AT1G07420.1,AT2G29390.1 Phypa1|28005,Phypa1|38423  
AT4G00630.1,AT1G01790.1 Phypa1|24380,Phypa1|25624,Phypa1|29528  
AT4G04850.1 Phypa1|414,Phypa1|906  
AT4G00640.1  
AT3G49190.1,AT3G49200.1,AT3G49210.1,AT5G12420.1,AT1G72110.1,AT5G53390.1,AT5G37300.1,AT5G16350.1,AT5G22490.1,AT2G38995.1,AT5G53380.1 Phypa1|29688  
AT2G43255.1  
AT3G07020.1 Phypa1|37758,Phypa1|29710,Phypa1|37395,Phypa1|27653  
AT1G43620.1  
Phypa1|27262  
AT1G31340.1 Phypa1|37186,Phypa1|37196  
AT2G36170.1,AT3G52590.1  
Phypa1|29733,Phypa1|30131,Phypa1|29584,Phypa1|29340,Phypa1|25674,Phypa1|30111  
AT3G62250.1,AT2G47110.1 Phypa1|36600,Phypa1|31815,Phypa1|34458,Phypa1|38632  
AT4G05320.2 Phypa1|15293,Phypa1|38571,Phypa1|39393  
AT2G35635.1  
AT1G11980.1  
AT1G11970.1  
AT1G23410.1  
AT5G20620.1  
AT5G09340.1  
AT1G53950.1,AT3G09790.1,AT4G02890.1,AT5G03240.1,AT1G65350.1,AT4G05050.1,AT1G53980.1  
AT1G53930.1  
AT1G55060.1  
Phypa1|33241  
Phypa1|2284,Phypa1|11073  
AT4G30110.1,AT4G30120.1 Phypa1|29308,Phypa1|26338  
AT2G19110.1  
AT4G14710.2,AT4G14716.1,AT2G26400.1 Phypa1|26769,Phypa1|33208,Phypa1|27677  
AT5G43850.1  
Phypa1|6766,Phypa1|26315,Phypa1|29402,Phypa1|24336  
Phypa1|4053  
AT3G10420.2 Phypa1|951  
AT1G33290.1  
AT1G73170.1  
AT5G11490.1 Phypa1|37221  
AT4G23460.1,AT4G11380.1 Phypa1|39610,Phypa1|39516,Phypa1|23790  
AT5G43950.1,AT1G04090.1,AT3G04350.1,AT5G18490.1 Phypa1|29983,Phypa1|28894  
AT2G44260.2,AT3G01870.1,AT3G01880.1,AT2G44230.1  
Phypa1|8367  
AT1G80600.1 Phypa1|38067,Phypa1|24547  
AT5G46180.1 Phypa1|37177  
Phypa1|31285  
Phypa1|8497  
Phypa1|31344  
AT5G27150.1,AT3G06370.1,AT3G05030.1  
Phypa1|2945,Phypa1|37437,Phypa1|25644,Phypa1|37599,Phypa1|37091  
AT5G55470.1  
AT4G30160.1,AT5G57320.1,AT3G57410.1,AT2G41740.1 Phypa1|37008,Phypa1|25259,Phypa1|29826  
AT2G29890.1  
Phypa1|33755  
AT3G25530.1 Phypa1|38104  
AT1G17650.1 Phypa1|24834  
Phypa1|3089  
AT5G55160.1,AT4G26840.1 Phypa1|29973,Phypa1|33120

AT5G48700.1,AT5G48710.1  
AT2G32765.1  
AT5G55170.1  
AT5G55855.1  
AT5G16760.1 Phypa1|38220,Phypa1|39019  
AT4G33770.1,AT4G08170.2 Phypa1|32792,Phypa1|22116  
Phypa1|39451  
AT4G35830.1,AT2G05710.1,AT4G26970.1 Phypa1|33984,Phypa1|29446  
Phypa1|18643  
Phypa1|3063  
Phypa1|33231  
AT4G19710.2,AT1G31230.1 Phypa1|27217,Phypa1|28835  
Phypa1|15082,Phypa1|27207  
AT2G26830.1 Phypa1|36144,Phypa1|35615  
AT4G09760.1,AT1G71697.1,AT1G74320.1 Phypa1|2914,Phypa1|23804  
AT1G64680.1 Phypa1|2427  
AT4G01995.1 Phypa1|25119  
Phypa1|26539,Phypa1|9174  
Phypa1|27247  
AT2G31170.1 Phypa1|30960  
AT5G38830.1,AT3G56300.1  
Phypa1|33459,Phypa1|22794,Phypa1|32162  
Phypa1|23551  
AT3G07700.1 Phypa1|37768  
AT5G64940.1 Phypa1|27104  
Phypa1|16176  
Phypa1|23990  
AT1G77220.1,AT4G38360.2 Phypa1|39736,Phypa1|38241  
AT1G23070.1  
Phypa1|28202,Phypa1|487,Phypa1|29129  
AT2G41380.1 Phypa1|38314,Phypa1|25492  
AT5G10830.1,AT3G54150.1,AT3G61210.1,AT4G22530.1,AT1G55450.1  
AT5G01260.2 Phypa1|33731,Phypa1|8328,Phypa1|33955  
AT1G34060.1,AT1G34040.1 Phypa1|38352,Phypa1|27213  
AT1G70560.1,AT1G23320.1,AT4G24670.1 Phypa1|25448,Phypa1|37429,Phypa1|24523  
Phypa1|24672  
AT1G15250.1,AT3G16080.1,AT1G52300.1  
Phypa1|38356,Phypa1|39167,Phypa1|2423,Phypa1|36869,Phypa1|352,Phypa1|38136  
AT5G01990.1 Phypa1|39765,Phypa1|20997  
AT1G71090.1 Phypa1|2900,Phypa1|29188  
Phypa1|2734  
AT3G22370.1,AT1G32350.1,AT5G64210.1,AT3G22360.1,AT3G27620.1 Phypa1|15608  
AT5G52650.1,AT4G25740.1,AT5G41520.1  
Phypa1|36142,Phypa1|36448,Phypa1|24040,Phypa1|38713,Phypa1|1622,Phypa1|35750,Phypa1|38893  
AT3G14930.1 Phypa1|24478  
AT2G40490.1 Phypa1|37099  
Phypa1|24601  
Phypa1|30886  
AT4G14320.1,AT3G23390.1 Phypa1|26880,Phypa1|36204,Phypa1|23908,Phypa1|35965,Phypa1|24117  
AT5G56940.1,AT4G34620.1 Phypa1|24270  
Phypa1|1275,Phypa1|1273,Phypa1|2384  
Phypa1|31340  
AT5G02230.1,AT3G62040.1,AT5G59490.1,AT5G59480.1 Phypa1|28511  
AT2G32150.1  
AT2G25940.1,AT4G32940.1 Phypa1|3047,Phypa1|27743,Phypa1|36371,Phypa1|25144  
AT1G62710.1  
AT3G20210.1  
AT3G62870.1,AT2G47610.1  
Phypa1|36926,Phypa1|29031,Phypa1|39153,Phypa1|36383,Phypa1|23777,Phypa1|37336  
AT3G03910.1,AT5G07440.1,AT5G18170.1 Phypa1|26585  
Phypa1|37306,Phypa1|28201,Phypa1|28954  
Phypa1|31231  
AT3G26618.1,AT1G12920.1 Phypa1|33564,Phypa1|37337,Phypa1|30107,Phypa1|2738  
AT5G47880.1  
AT4G30080.1,AT2G28350.1 Phypa1|24085,Phypa1|29691  
AT4G23980.1,AT1G59750.1,AT3G61830.1,AT2G46530.3 Phypa1|1429,Phypa1|39512,Phypa1|26623,Phypa1|38259  
AT5G37020.1,AT1G30330.2 Phypa1|8216,Phypa1|34265,Phypa1|26644,Phypa1|2242  
ATMG00940.1,AT1G77850.1  
AT1G35240.1,AT1G34170.1,AT1G34310.1,AT1G34390.1,AT1G43950.1,AT1G34410.1,AT1G35540.1,AT1G35520.1  
AT2G33860.1,AT5G62000.1  
AT5G20730.1,AT1G19850.1,AT1G19220.1  
Phypa1|3016  
Phypa1|10918,Phypa1|27185,Phypa1|27826,Phypa1|28072  
Phypa1|39079  
AT3G22560.1,AT2G32030.1,AT2G32020.1 Phypa1|31576,Phypa1|29682  
Phypa1|23452,Phypa1|19386  
Phypa1|32549  
Phypa1|23205  
AT1G78720.1,AT1G29310.1,AT2G34250.1 Phypa1|39587,Phypa1|38984  
AT2G20340.1,AT4G28680.1 Phypa1|37027,Phypa1|37026,Phypa1|27528  
Phypa1|11877  
AT5G26220.1,AT4G31290.1 Phypa1|26441,Phypa1|37951,Phypa1|1137,Phypa1|26204

AT1G44790.1  
 AT5G18110.1 Phypa1|24655  
 AT1G29550.1,AT4G18040.1 Phypa1|39713,Phypa1|36468,Phypa1|2625,Phypa1|32589  
 AT1G29590.1  
 AT5G35620.1  
 AT2G36250.1,AT3G52750.1 Phypa1|38811,Phypa1|36904  
 AT5G55280.1 Phypa1|37834,Phypa1|37067  
 Phypa1|38765  
 AT4G34555.1,AT2G21580.1,AT4G39200.1 Phypa1|2604,Phypa1|36172,Phypa1|25460  
 AT2G16360.1  
 Phypa1|26500,Phypa1|26493  
 Phypa1|6558  
 AT5G27470.1 Phypa1|28204,Phypa1|24969  
 AT1G11870.2 Phypa1|29231  
 Phypa1|31425  
 Phypa1|23401  
 AT4G13830.2 Phypa1|28457,Phypa1|34103  
 AT5G01390.1,AT2G20560.1,AT3G08910.1,AT4G28480.1  
 Phypa1|37194,Phypa1|39305,Phypa1|39277,Phypa1|36865,Phypa1|3080  
 AT2G41000.1 Phypa1|813  
 AT5G16650.1 Phypa1|26781,Phypa1|29212  
 AT2G20550.1  
 AT1G10350.1,AT1G59725.1  
 AT3G47940.1  
 AT1G11040.1,AT1G44160.1  
 AT1G72416.1,AT1G56300.1  
 AT5G25530.1  
 AT1G71000.1  
 AT2G33735.1  
 Phypa1|1679  
 Phypa1|4294  
 AT5G01650.1 Phypa1|33766  
 AT3G51660.1  
 AT5G57170.1  
 AT5G67410.1,AT2G14850.1,AT4G31440.1,AT4G33890.1,AT2G24530.1 Phypa1|1976,Phypa1|9672  
 AT5G15640.1 Phypa1|37089  
 AT5G26200.1,AT1G72820.1 Phypa1|32695,Phypa1|36445  
 AT5G23570.1 Phypa1|28587  
 AT5G17310.2,AT3G03250.1 Phypa1|36401,Phypa1|35209  
 Phypa1|26249  
 AT2G21450.1,AT2G16390.1 Phypa1|25520,Phypa1|24704  
 AT3G24340.1,AT1G05480.1 Phypa1|28565  
 AT2G19480.1,AT5G56950.1,AT4G26110.1 Phypa1|24332,Phypa1|39613  
 AT3G13782.1  
 AT3G12980.1,AT1G16710.1,AT1G79000.1 Phypa1|3,Phypa1|399  
 AT1G67220.1  
 AT1G55970.1  
 Phypa1|20759  
 Phypa1|16400  
 AT5G06600.1,AT3G11910.1 Phypa1|39044,Phypa1|37036,Phypa1|36440  
 AT1G21650.1 Phypa1|30647  
 AT4G01800.1 Phypa1|38208  
 Phypa1|31888  
 Phypa1|35475  
 Phypa1|23238  
 Phypa1|31064  
 AT4G02930.1 Phypa1|28814,Phypa1|984,Phypa1|971  
 AT4G20360.1 Phypa1|37330  
 Phypa1|28275  
 AT4G02780.1 Phypa1|23926  
 AT1G61120.1  
 Phypa1|1680,Phypa1|7483  
 Phypa1|13758  
 Phypa1|1683  
 AT5G01920.1 Phypa1|25934  
 AT1G68830.1 Phypa1|37398,Phypa1|37079  
 AT1G06310.1,AT1G06290.1 Phypa1|39155,Phypa1|38497  
 AT5G65110.1 Phypa1|22263,Phypa1|31879  
 AT3G06690.1  
 AT5G05830.1,AT2G37950.1,AT5G59000.1 Phypa1|722,Phypa1|733,Phypa1|1169  
 AT5G01070.1  
 AT2G34200.1  
 AT5G38900.1 Phypa1|38467  
 Phypa1|30018  
 Phypa1|31359  
 AT5G09420.1,AT3G17970.1 Phypa1|37896  
 AT1G08980.1  
 Phypa1|28554,Phypa1|27482  
 AT1G68370.1 Phypa1|36804,Phypa1|38675,Phypa1|36030  
 AT1G59980.1,AT1G24120.1  
 Phypa1|10249  
 AT1G79090.1,AT4G14990.1,AT3G22270.1 Phypa1|38026,Phypa1|25151

AT4G38600.1 Phypa1|29543,Phypa1|37118  
 AT5G02880.1 Phypa1|23313  
 Phypa1|9506  
 AT1G11360.1 Phypa1|686,Phypa1|2311,Phypa1|36339,Phypa1|27429  
 AT4G27320.1,AT5G54430.1  
 AT2G18020.1,AT4G36130.1  
 Phypa1|36936,Phypa1|27301,Phypa1|39788,Phypa1|38158,Phypa1|38496,Phypa1|32545  
 AT3G51190.1  
 AT3G26640.1,AT1G12910.1 Phypa1|37869,Phypa1|27321  
 AT5G24520.1 Phypa1|2899,Phypa1|15486  
 AT1G34320.1,AT5G08660.1 Phypa1|27947,Phypa1|31881,Phypa1|26391  
 AT1G30755.1  
 AT2G33410.1,AT4G26650.1,AT3G07810.2,AT4G14300.1,AT5G55550.3  
 Phypa1|24657,Phypa1|24987,Phypa1|28442,Phypa1|24972  
 AT5G04280.1,AT4G36960.1,AT3G13224.2,AT3G08000.1,AT3G23830.1  
 Phypa1|30987,Phypa1|34063,Phypa1|24599,Phypa1|856,Phypa1|25622  
 AT3G26420.1 Phypa1|27975  
 AT1G17640.1  
 AT1G58470.1,AT5G47620.1  
 AT1G73530.1 Phypa1|25532,Phypa1|25529,Phypa1|878  
 Phypa1|1632,Phypa1|1631  
 AT1G31730.1 Phypa1|38567,Phypa1|26786  
 AT1G23900.1,AT1G60070.1 Phypa1|28301,Phypa1|23994,Phypa1|32201  
 AT1G23940.1 Phypa1|2742  
 AT2G27020.1 Phypa1|36770,Phypa1|34747  
 AT3G22110.1 Phypa1|37380,Phypa1|39141,Phypa1|37788  
 AT5G56490.1,AT2G46740.1,AT5G11540.1,AT2G46750.1,AT2G46760.1,AT1G32300.1 Phypa1|33632  
 Phypa1|31333  
 Phypa1|16234  
 AT2G34210.1,AT4G08350.1 Phypa1|26265,Phypa1|28235  
 AT5G04290.1  
 AT4G08360.1  
 AT1G70190.1 Phypa1|39661,Phypa1|782,Phypa1|2121,Phypa1|6292  
 AT4G37660.1  
 AT3G06040.1  
 AT4G36420.1  
 AT2G03130.1  
 AT2G37190.1,AT3G53430.1,AT5G60670.1  
 Phypa1|38800,Phypa1|35190,Phypa1|29692,Phypa1|36079,Phypa1|37042,Phypa1|37738  
 Phypa1|36394  
 AT1G06960.1,AT2G30260.1 Phypa1|27192  
 AT2G47580.1  
 AT3G03120.1,AT5G17060.1 Phypa1|36938,Phypa1|38501,Phypa1|36502  
 AT2G18390.1 Phypa1|36671  
 AT5G52210.1 Phypa1|29652,Phypa1|6868  
 AT2G24765.1 Phypa1|24051,Phypa1|2713  
 AT5G67560.1,AT3G49870.1 Phypa1|37031,Phypa1|24666,Phypa1|24044  
 AT3G22950.1 Phypa1|23674,Phypa1|24295  
 AT1G10630.1,AT2G47170.1,AT1G70490.1,AT3G62290.1,AT5G14670.1,AT1G23490.1  
 Phypa1|37582,Phypa1|33304,Phypa1|38734,Phypa1|38711,Phypa1|37581,Phypa1|23992,Phypa1|36750  
 AT5G37680.1  
 AT3G49860.1  
 AT1G02430.1,AT1G02440.1  
 AT2G15310.1 Phypa1|39583  
 Phypa1|2598,Phypa1|38393,Phypa1|2514,Phypa1|39206,Phypa1|31554  
 Phypa1|26974  
 Phypa1|20004  
 Phypa1|32375  
 AT5G11790.1,AT5G56750.1,AT2G19620.1  
 Phypa1|30399,Phypa1|37358,Phypa1|37873,Phypa1|39605,Phypa1|37264,Phypa1|29137,Phypa1|24013  
 AT5G13260.1,AT5G23700.1,AT3G48860.2,AT4G25070.1 Phypa1|28643,Phypa1|181,Phypa1|37464  
 AT4G08630.1 Phypa1|17076  
 AT1G04920.1 Phypa1|38702,Phypa1|39072  
 AT4G10120.1,AT5G20280.1  
 AT5G11110.1 Phypa1|13407  
 AT4G27110.1,AT4G16120.1,AT3G20580.1,AT3G16860.1,AT5G49270.1  
 Phypa1|36173,Phypa1|32973,Phypa1|25842,Phypa1|29678,Phypa1|29270,Phypa1|37852,Phypa1|37545,  
 Phypa1|37796  
 AT1G33170.1,AT4G10440.1 Phypa1|19716,Phypa1|37719,Phypa1|29567,Phypa1|38543  
 AT4G19120.1,AT1G31850.1 Phypa1|32704,Phypa1|39065  
 AT4G00740.1 Phypa1|38997,Phypa1|37375  
 AT3G51070.1,AT5G64030.1 Phypa1|37859,Phypa1|36014,Phypa1|24968,Phypa1|27461,Phypa1|36860  
 AT1G04430.1,AT4G14360.1,AT5G14430.1,AT3G23300.1  
 Phypa1|37326,Phypa1|24609,Phypa1|28177,Phypa1|37952  
 AT1G77260.1,AT2G39750.1,AT5G06050.1 Phypa1|27330

AT4G18030.1,AT1G26850.1  
AT4G00750.1,AT2G45750.1  
AT2G43200.1  
AT2G40280.1,AT2G34300.1,AT1G29470.1  
AT1G19430.1  
AT3G56080.1  
AT2G03480.1,AT1G78240.1,AT1G13860.1  
AT3G10200.1,AT5G04060.1  
Phypa1|6898  
Phypa1|30572  
Phypa1|2617  
AT2G03890.1,AT1G26270.1,AT1G13640.1 Phypa1|25428,Phypa1|34045  
AT2G40850.1,AT3G56600.1  
AT1G55230.1,AT5G19870.1,AT1G55240.1 Phypa1|38649  
AT1G49470.1  
AT1G26670.1 Phypa1|38164,Phypa1|38138  
AT5G39510.1,AT3G29100.1  
AT5G39630.1  
Phypa1|27133  
AT2G43040.1 Phypa1|26816,Phypa1|31628  
AT1G27460.1,AT4G28600.1  
AT4G00234.1,AT4G00290.1 Phypa1|37592,Phypa1|29951,Phypa1|38712  
Phypa1|29950  
Phypa1|205  
Phypa1|28476,Phypa1|17007  
AT2G39770.1,AT3G55590.1 Phypa1|38996,Phypa1|37954  
AT4G30570.1  
Phypa1|31070,Phypa1|30761  
Phypa1|23426  
AT1G15380.1,AT2G28420.1,AT1G80160.1 Phypa1|246,Phypa1|24079,Phypa1|37095  
AT4G29600.1,AT4G29610.1,AT2G19570.1 Phypa1|38137,Phypa1|26144,Phypa1|31521  
AT4G29580.1,AT4G29630.1,AT4G29620.1,AT4G29640.1,AT4G29570.1  
AT4G29650.1  
AT4G25835.1,AT2G18190.1,AT3G28520.1,AT2G18193.1,AT3G28580.1,AT3G28600.1,AT3G28570.1,AT5G57480.1,AT3G28610.1,AT4G30250.1,AT3G50930.1,AT3G50940.1,AT3G28510.1,AT1G43910.1,AT5G17730.1,AT5G40010.1,AT5G17740.1,AT5G40000.1,AT3G28540.1,AT5G17760.1 Phypa1|691  
AT2G46620.1,AT5G17750.1  
AT3G29800.1,AT4G05380.1  
AT4G05340.1  
Phypa1|12263,Phypa1|35288,Phypa1|19514,Phypa1|6345,Phypa1|39528,Phypa1|32251,Phypa1|28316  
AT2G38230.1,AT5G01410.1 Phypa1|36567,Phypa1|39628,Phypa1|34941,Phypa1|36101  
AT2G38210.1  
AT3G16050.1  
Phypa1|31482  
AT1G26820.1,AT1G14220.1,AT2G02990.1 Phypa1|26505,Phypa1|30264  
AT2G39780.1  
AT1G14210.1  
AT3G22320.1 Phypa1|38441,Phypa1|2536  
AT3G57080.1,AT3G54490.1,AT2G41340.1  
AT3G16680.1  
AT5G57980.1  
Phypa1|27985  
AT1G63850.1 Phypa1|1833,Phypa1|2255  
AT3G50780.1  
AT2G13690.1  
AT5G60050.1  
AT5G67630.1,AT3G49830.1 Phypa1|35035,Phypa1|3042  
AT5G22330.1 Phypa1|3800  
Phypa1|7489  
AT3G62240.1,AT2G47090.1 Phypa1|36170  
AT3G05975.1,AT3G54200.1 Phypa1|6450,Phypa1|28800  
Phypa1|31687,Phypa1|26251,Phypa1|29048,Phypa1|20726  
AT5G66030.1 Phypa1|24850,Phypa1|38553  
AT3G05350.1 Phypa1|39689  
AT4G36760.1 Phypa1|27373  
AT2G28900.1  
Phypa1|39485,Phypa1|33271,Phypa1|24257,Phypa1|39187,Phypa1|28718,Phypa1|29199,Phypa1|8089  
AT4G16160.2  
Phypa1|29734,Phypa1|19201  
AT3G52340.1,AT3G54270.1,AT2G35840.1,AT1G51420.1  
Phypa1|37348,Phypa1|39200,Phypa1|18810,Phypa1|36622  
Phypa1|36147  
AT3G15850.1 Phypa1|3077,Phypa1|554  
AT3G15870.1,AT2G31360.1,AT1G06080.1,AT1G06120.1,AT1G06100.1  
AT1G06090.1,AT1G06360.1,AT1G06350.1  
AT1G67170.1,AT3G14750.1 Phypa1|25768,Phypa1|230  
AT5G61920.1  
AT1G55170.1  
AT2G30120.1  
AT3G23380.1,AT1G03982.1,AT4G04900.1,AT4G28556.1,AT1G04450.1,AT2G20430.1,AT2G33460.1  
Phypa1|8027  
AT5G43830.1,AT3G22850.1 Phypa1|29487,Phypa1|37180

AT5G19140.1  
AT3G15450.1,AT4G27450.1  
AT5G65010.2,AT5G10240.1,AT3G47340.1 Phypa1|35708,Phypa1|39627,Phypa1|36456  
Phypa1|31228,Phypa1|22034  
Phypa1|14031  
AT3G29320.1 Phypa1|8675,Phypa1|23982  
AT3G46970.1  
Phypa1|27166  
AT4G27710.1,AT5G38450.1,AT1G75130.1,AT3G14690.1,AT2G26710.1,AT2G46950.1,AT1G67110.1,AT3G14610.1,A  
T2G46960.2,AT3G14650.1,AT3G14660.1,AT3G14680.1,AT3G14620.1,AT3G14640.1,AT3G14630.1  
Phypa1|36188,Phypa1|37722,Phypa1|28381  
AT1G17060.1  
AT5G24910.1,AT5G24900.1  
AT5G52400.1  
Phypa1|15743  
Phypa1|25517  
Phypa1|31032  
Phypa1|13638  
AT1G16520.1,AT1G56080.1  
Phypa1|27226,Phypa1|25268,Phypa1|35837,Phypa1|23868,Phypa1|39009,Phypa1|35810,Phypa1|27124  
AT4G15545.1  
Phypa1|17314  
Phypa1|1621  
AT1G24180.1,AT1G59900.1 Phypa1|23819,Phypa1|37585,Phypa1|26172  
AT1G01090.1 Phypa1|39308,Phypa1|39585  
Phypa1|2896  
AT2G24940.1 Phypa1|24166  
AT5G52240.1,AT3G48890.1 Phypa1|38898,Phypa1|1133,Phypa1|23723  
AT5G43460.1,AT4G14420.1,AT1G04340.1 Phypa1|38728,Phypa1|39288  
AT3G23175.1  
AT3G23190.1,AT3G23180.1  
Phypa1|11656  
AT2G36500.1,AT3G52950.1 Phypa1|24867,Phypa1|36893,Phypa1|27171,Phypa1|27203,Phypa1|27830  
AT5G50530.1,AT5G50640.1,AT5G63490.1  
AT3G56090.1,AT3G11050.1,AT2G40300.1,AT5G01600.1 Phypa1|27942,Phypa1|36533,Phypa1|33081  
Phypa1|17015  
AT5G27770.1,AT3G05560.1  
Phypa1|25968,Phypa1|313,Phypa1|37485,Phypa1|7389,Phypa1|25299,Phypa1|30788,Phypa1|25330  
AT1G02830.1  
AT1G75380.1,AT1G19660.1  
Phypa1|1981,Phypa1|1082,Phypa1|613,Phypa1|25275,Phypa1|26653,Phypa1|27873  
Phypa1|37905,Phypa1|36393  
Phypa1|10823  
AT4G39650.1,AT4G39640.1 Phypa1|14493  
AT1G69820.1  
AT4G29210.1  
Phypa1|30435  
AT1G27450.1,AT4G22570.1,AT4G12440.2,AT5G11160.1 Phypa1|38990  
AT1G80050.1  
Phypa1|31287  
AT1G18250.2,AT1G73620.1 Phypa1|30575,Phypa1|10623,Phypa1|37092  
AT1G20030.2,AT4G24180.1,AT4G36010.1,AT2G17860.1,AT4G38670.1,AT1G75800.1,AT4G38660.1,AT1G19320.1  
AT4G36000.1,AT1G75030.1,AT1G75040.1  
AT5G40020.1,AT5G24620.1  
AT2G28790.1  
AT5G02140.1  
AT1G75050.1  
AT4G11650.1  
AT2G24810.1  
AT1G77700.1  
AT5G27730.1 Phypa1|25289,Phypa1|27931  
AT5G47900.1  
AT1G41880.1,AT1G07070.1,AT3G55750.1,AT1G74270.1  
Phypa1|37028,Phypa1|3587,Phypa1|23830,Phypa1|32755,Phypa1|2414,Phypa1|23810  
AT1G48830.1,AT3G02560.1,AT5G16130.1 Phypa1|38592,Phypa1|35569,Phypa1|14357,Phypa1|37237  
AT4G39080.1,AT2G21410.1 Phypa1|37880,Phypa1|24692,Phypa1|26529,Phypa1|38952  
AT2G28520.1  
Phypa1|27757  
AT4G16070.1,AT3G14075.1 Phypa1|37438  
Phypa1|27978  
AT4G09800.1,AT1G34030.1,AT1G22780.1  
Phypa1|37741,Phypa1|36089,Phypa1|39364,Phypa1|36090,Phypa1|38746,Phypa1|37646  
AT3G53870.1,AT5G35530.1,AT2G31610.1  
Phypa1|36273,Phypa1|39741,Phypa1|33958,Phypa1|39097,Phypa1|32642,Phypa1|38428  
Phypa1|24113  
AT1G51690.1,AT1G17720.1  
Phypa1|23933,Phypa1|2526,Phypa1|23893,Phypa1|37427,Phypa1|30638,Phypa1|29831  
Phypa1|28001  
AT1G77870.1,AT1G22050.1 Phypa1|27712,Phypa1|16857,Phypa1|10625  
AT4G24990.1,AT3G26980.1  
AT5G15460.1,AT3G01050.1  
AT4G35290.1,AT2G17260.1,AT3G51480.1,AT1G05200.1,AT2G32400.1,AT2G32390.1,AT1G42540.1

Phypa1|26446,Phypa1|37773  
AT3G07520.1,AT3G04110.1,AT5G48410.1,AT5G48400.2,AT2G29120.1,AT5G27100.1,AT4G31710.1,AT2G24720.1,AT5G11210.1,AT2G29110.1,AT2G29100.1,AT2G24710.1  
AT5G11180.1  
AT5G26830.1 Phypa1|39687  
AT2G04842.1 Phypa1|36335,Phypa1|27128  
AT1G18130.1,AT1G17960.1  
Phypa1|23412,Phypa1|22633  
Phypa1|15158  
AT1G70600.1,AT1G23290.1  
Phypa1|39174,Phypa1|24566,Phypa1|24159,Phypa1|35677,Phypa1|36823,Phypa1|38192  
AT1G12960.1  
Phypa1|2525  
AT1G74510.1,AT2G02870.1,AT1G26930.1,AT1G14330.1,AT5G60570.1 Phypa1|37249,Phypa1|39037  
AT3G27150.1,AT5G40680.1  
AT5G47750.1,AT4G26610.1,AT5G55910.1,AT2G44830.1 Phypa1|52,Phypa1|54  
AT3G45780.1 Phypa1|15463,Phypa1|36884,Phypa1|39772,Phypa1|9095,Phypa1|39233  
AT1G48490.1,AT5G62310.1,AT3G17850.1  
Phypa1|29741,Phypa1|28622,Phypa1|29653,Phypa1|30066,Phypa1|30241  
AT3G25250.1,AT3G12690.1  
AT3G52890.1,AT5G03640.1,AT2G36350.1  
AT5G40030.1  
AT3G27580.1  
AT1G16440.1,AT1G79250.1  
AT5G58140.1  
AT1G51170.1,AT3G20830.1  
AT1G45160.1  
Phypa1|37215,Phypa1|26673  
Phypa1|29967  
AT5G01220.1 Phypa1|27095,Phypa1|25389  
Phypa1|30758  
Phypa1|20863  
AT2G35110.1 Phypa1|36469,Phypa1|25967  
AT1G23750.1 Phypa1|34311,Phypa1|24239  
AT1G03810.1,AT2G33845.1,AT4G28440.1  
AT1G10590.3  
AT1G76810.1,AT1G76825.1,AT1G76720.1 Phypa1|29398  
AT1G21160.1  
AT2G27700.1  
Phypa1|4052  
AT1G03370.1,AT4G03000.1,AT5G50170.1  
Phypa1|37866,Phypa1|39519,Phypa1|28260,Phypa1|26706,Phypa1|36235  
AT1G10320.1 Phypa1|30128  
AT5G42820.1,AT1G27650.1 Phypa1|1092,Phypa1|37645  
AT3G44785.1  
AT1G67730.1 Phypa1|23778  
AT1G24470.1  
AT4G20380.2 Phypa1|752,Phypa1|36032  
AT4G21610.1  
AT1G32540.1  
AT1G19440.1,AT2G16280.1 Phypa1|23747,Phypa1|4133,Phypa1|32454,Phypa1|23682  
AT2G26640.1 Phypa1|37754,Phypa1|38420,Phypa1|5592  
AT4G34520.1,AT2G15090.1,AT4G34250.1,AT4G34510.1  
AT5G04530.1  
AT1G71160.1,AT1G25450.1,AT1G68530.1  
AT3G10280.1,AT1G04220.1,AT5G43760.1,AT2G46720.1,AT1G01120.1  
AT1G07720.1,AT2G28630.1  
AT3G52160.1,AT2G26250.1  
AT5G49070.1  
Phypa1|32995  
Phypa1|18709  
Phypa1|9579  
Phypa1|2678  
Phypa1|27800,Phypa1|32475  
AT3G53000.1,AT3G61060.2,AT1G12710.1,AT5G52120.1,AT1G63090.1 Phypa1|30362,Phypa1|2000  
Phypa1|237  
AT3G49430.1,AT1G02840.1,AT4G02430.2 Phypa1|28631,Phypa1|24716,Phypa1|38399  
AT1G09140.1  
AT2G25490.1,AT5G25350.1 Phypa1|38007,Phypa1|28777  
AT4G15475.1  
AT3G57630.1 Phypa1|37080  
AT1G10290.1,AT1G59610.1 Phypa1|38103,Phypa1|27643,Phypa1|25906,Phypa1|23764  
Phypa1|17072  
AT4G40030.1 Phypa1|38172  
AT1G09200.1,AT5G10400.1,AT5G65360.1,AT5G10390.1,AT3G27360.1  
Phypa1|31002,Phypa1|38480,Phypa1|24798,Phypa1|28391,Phypa1|33627,Phypa1|3049,Phypa1|2891,Phypa1|23717,Phypa1|4604  
AT1G75600.1  
AT4G40040.1  
AT1G19890.1  
AT5G10980.1  
AT5G12910.1

AT1G13370.1  
 AT5G65350.1  
     Phypa1|31345  
     Phypa1|24511  
     Phypa1|2974  
     Phypa1|24462  
     Phypa1|25474  
 AT3G17020.1      Phypa1|2150,Phypa1|24272,Phypa1|35675,Phypa1|2723,Phypa1|26599  
 AT3G03270.1,AT3G53990.1  
 AT5G11700.1,AT4G32920.1      Phypa1|29262,Phypa1|29138,Phypa1|26127,Phypa1|29504,Phypa1|37414  
 AT5G47020.1  
 AT1G19970.1,AT2G21190.1,AT4G38790.1,AT1G75760.1      Phypa1|39285,Phypa1|39729,Phypa1|39514  
 AT3G25160.1  
     Phypa1|30164  
 AT5G27200.1,AT1G54630.1,AT4G25050.1,AT1G54580.1,AT3G05020.1  
     Phypa1|38727,Phypa1|1266,Phypa1|1265  
 AT2G43970.1      Phypa1|10852,Phypa1|33503,Phypa1|28611  
 AT3G19090.1  
 AT5G46250.1  
 AT1G27480.1      Phypa1|38415  
 AT3G13730.1,AT4G36380.1,AT3G30180.1,AT1G12740.1,AT1G73340.1,AT5G05690.1,AT3G50660.1,AT5G38970.1,A  
 T5G45340.1      Phypa1|27078,Phypa1|29705,Phypa1|5974  
 AT1G55940.1,AT3G30290.1,AT4G15393.1,AT5G48000.1,AT4G15396.1,AT4G15310.1,AT4G15300.1,AT1G65670.1,A  
 T1G78490.1,AT3G44970.1  
 AT5G14400.1  
 AT1G19630.1  
     Phypa1|39240  
     Phypa1|816  
 AT4G29670.2,AT4G26160.1      Phypa1|2096,Phypa1|2095  
 AT1G08570.1,AT5G61440.1,AT2G33270.1  
 AT5G64130.1,AT1G69510.1      Phypa1|2216,Phypa1|2200  
 AT4G16146.1  
 AT4G34430.4,AT2G33610.1      Phypa1|16773,Phypa1|35486,Phypa1|33040,Phypa1|33870  
 AT1G21700.1  
 AT2G47620.1  
 AT5G10350.1,AT5G65260.1      Phypa1|35736,Phypa1|27153,Phypa1|39721  
 AT5G51120.1  
     Phypa1|38173  
 AT1G61010.1      Phypa1|38790,Phypa1|36210  
 AT2G01730.1      Phypa1|27778  
 AT4G16250.1,AT2G18790.1  
     Phypa1|39406,Phypa1|36854,Phypa1|39595,Phypa1|39208,Phypa1|24962,Phypa1|38575,Phypa1|33584  
 AT1G09570.1  
 AT4G18130.1  
 AT5G35840.1  
     Phypa1|3904  
 AT2G02970.1,AT1G14250.1,AT1G14240.1,AT1G14230.1      Phypa1|1389  
     Phypa1|7481,Phypa1|29796  
 AT2G15230.1      Phypa1|27708,Phypa1|25798  
 AT5G14180.1  
     Phypa1|5372  
     Phypa1|29991  
     Phypa1|29150  
 AT1G20760.1,AT1G21630.1      Phypa1|7268,Phypa1|33514,Phypa1|34123  
     Phypa1|17265,Phypa1|5747  
     Phypa1|16354  
 AT1G09610.1,AT1G67330.1,AT1G71690.1,AT1G27930.1,AT1G33800.1,AT4G09990.1      Phypa1|25055  
 AT4G24910.1  
 AT3G22490.1,AT3G22500.1      Phypa1|37919,Phypa1|28560  
 AT5G53270.1,AT5G27980.1,AT1G03120.1,AT5G53260.1  
 AT3G24590.1      Phypa1|1973,Phypa1|2303,Phypa1|1120  
 AT1G06870.1,AT2G30440.1  
     Phypa1|31422,Phypa1|31145  
 AT3G11800.1,AT2G15910.1,AT3G44150.1      Phypa1|36574  
 AT3G48630.1  
     Phypa1|7889  
     Phypa1|873  
 AT2G18630.1,AT4G34330.1,AT4G34320.1,AT5G66660.1,AT5G66670.1,AT5G66675.1      Phypa1|36270  
 AT3G57100.1  
 AT3G28270.1  
 AT3G02770.1,AT5G56260.1,AT5G16450.1      Phypa1|28761,Phypa1|39294  
     Phypa1|20529  
 AT2G02180.1,AT1G14530.1      Phypa1|29804,Phypa1|1960,Phypa1|39413  
 AT4G21790.1  
 AT5G36170.1      Phypa1|36796  
 AT1G56350.1      Phypa1|29292  
 AT3G57190.1  
     Phypa1|31068  
 AT2G19390.1,AT4G29790.1      Phypa1|35244,Phypa1|35436,Phypa1|35438  
 AT5G22450.1  
     Phypa1|19352,Phypa1|35392  
 AT1G18440.1      Phypa1|29207,Phypa1|37298



AT5G38290.2,AT5G16140.1,AT5G19830.1  
 AT4G29800.1,AT3G54950.1,AT2G39220.1 Phypa1|25047,Phypa1|26626  
 AT3G63200.1  
 AT5G53580.1 Phypa1|7937  
 AT1G06690.1  
 AT1G08125.1 Phypa1|26272  
 AT5G44170.1 Phypa1|2612  
 AT2G44310.1 Phypa1|14906  
 AT1G54530.1  
 AT1G02800.1,AT1G70710.1,AT1G71380.1,AT4G02290.1,AT1G22880.1,AT1G23210.1,AT4G39010.1  
 Phypa1|25210,Phypa1|27481,Phypa1|27022,Phypa1|20307  
 AT4G09740.1,AT4G23560.1 Phypa1|27479,Phypa1|28591,Phypa1|27188  
 AT4G11050.1,AT1G64390.1 Phypa1|37335,Phypa1|26353,Phypa1|25853,Phypa1|2903  
 AT4G24260.1,AT5G49720.1 Phypa1|15864,Phypa1|34201,Phypa1|25787  
 AT1G19940.1,AT1G75680.1 Phypa1|35333,Phypa1|33094  
 AT4G39000.1,AT4G38990.1  
 AT3G43860.1  
 AT3G42155.1  
 AT2G44570.1,AT2G44540.1,AT2G44560.1,AT1G48930.1,AT2G44550.1  
 AT2G32990.1  
 AT1G65610.1  
 Phypa1|2558  
 Phypa1|11769  
 Phypa1|26632,Phypa1|25093  
 AT5G64440.1 Phypa1|24835  
 Phypa1|9227,Phypa1|24652,Phypa1|24442  
 Phypa1|3273  
 Phypa1|32385  
 AT3G27540.1,AT1G67880.1,AT1G12990.1,AT3G01620.1,AT5G14480.1 Phypa1|26125,Phypa1|25189  
 AT2G13290.1  
 AT3G26445.1  
 AT1G20670.1,AT1G76380.2 Phypa1|35069,Phypa1|34746  
 AT5G55030.1  
 AT5G55040.1  
 AT5G01580.1,AT1G07080.1 Phypa1|24187,Phypa1|30065  
 AT4G12960.1,AT4G12900.1,AT4G12870.1,AT4G12890.1  
 AT4G16155.1,AT3G16950.1 Phypa1|25805,Phypa1|38011,Phypa1|27694  
 Phypa1|6762  
 AT4G00810.1,AT1G01100.1,AT5G47700.1  
 Phypa1|26226,Phypa1|39086,Phypa1|28351,Phypa1|32245,Phypa1|33261,Phypa1|25744  
 AT3G49460.1,AT5G24510.1  
 AT2G27710.1,AT2G27720.1 Phypa1|36085,Phypa1|32064,Phypa1|32317,Phypa1|39697,Phypa1|23806  
 AT3G28500.1,AT5G40040.1  
 AT3G44590.1  
 AT1G59359.1,AT2G41840.1,AT1G58983.1,AT1G58684.1,AT1G58380.1,AT3G57490.1  
 Phypa1|35713,Phypa1|37833,Phypa1|24832,Phypa1|39686  
 Phypa1|18390  
 AT1G21670.1,AT1G21680.1 Phypa1|29726  
 AT4G01870.1  
 AT5G26120.1,AT3G10740.1 Phypa1|29974,Phypa1|2783  
 Phypa1|22860  
 AT1G04820.1,AT1G50010.1,AT4G14960.2 Phypa1|38735  
 AT5G05620.1,AT3G61650.1 Phypa1|35091,Phypa1|34902  
 AT5G23860.1,AT2G29550.1,AT5G12250.1,AT5G62690.1,AT5G62700.1  
 Phypa1|38845,Phypa1|39452,Phypa1|33604,Phypa1|36957,Phypa1|24215,Phypa1|2728,Phypa1|39453  
 AT5G19780.1,AT5G19770.1 Phypa1|39615,Phypa1|39614,Phypa1|24003  
 AT4G20890.1,AT5G44340.1  
 AT1G75780.1  
 AT1G64740.1  
 Phypa1|3003,Phypa1|3364,Phypa1|28033  
 Phypa1|11420,Phypa1|19700,Phypa1|3951,Phypa1|24877  
 Phypa1|1322  
 Phypa1|9269  
 Phypa1|26208  
 Phypa1|103  
 Phypa1|25784,Phypa1|25303,Phypa1|27230  
 Phypa1|4371  
 Phypa1|29087  
 AT2G06255.1,AT1G17455.1,AT1G72630.1 Phypa1|2210  
 AT2G29950.1,AT2G40080.1  
 AT4G19950.1,AT5G44860.1,AT1G31130.1 Phypa1|23814,Phypa1|37792,Phypa1|38929,Phypa1|29414  
 AT5G20080.1 Phypa1|24958  
 AT5G17770.1 Phypa1|26621,Phypa1|39213  
 Phypa1|25043  
 AT3G48330.1 Phypa1|38427,Phypa1|7047  
 AT5G50240.1  
 Phypa1|2437,Phypa1|2613,Phypa1|2642,Phypa1|36590,Phypa1|35752,Phypa1|23956  
 AT3G06670.1 Phypa1|28214,Phypa1|27699,Phypa1|29867,Phypa1|26545,Phypa1|30413,Phypa1|25775  
 AT5G49380.1  
 AT5G49370.1  
 AT5G49390.1  
 AT5G36790.1,AT5G36700.1 Phypa1|35970,Phypa1|36336

AT5G47760.1  
Phypa1|15294  
AT5G49820.1 Phypa1|38747,Phypa1|38612  
AT2G23470.1 Phypa1|32543  
AT5G01510.1  
AT2G31350.1,AT2G43430.1,AT1G06130.1 Phypa1|26895  
AT3G10850.1 Phypa1|37094  
AT3G27060.1 Phypa1|26010,Phypa1|27545,Phypa1|16782  
AT5G40942.1  
AT3G23580.1  
AT1G53050.1,AT1G71530.1,AT1G09600.1,AT1G33770.1,AT5G50860.1,AT1G18670.1,AT5G44290.1,AT1G57700.1,A  
T3G05050.1,AT1G74330.1,AT1G54610.1,AT1G03740.1 Phypa1|39715  
AT3G48750.1 Phypa1|35193  
AT1G67580.1 Phypa1|2816,Phypa1|924  
AT5G10270.1,AT5G64960.1 Phypa1|27865,Phypa1|34917,Phypa1|24493  
AT4G22940.1,AT3G01085.1,AT5G39420.1  
AT4G10010.1  
AT5G63370.1  
Phypa1|6043  
AT3G04470.1 Phypa1|32514,Phypa1|37841  
AT1G62050.1  
AT1G11740.1  
AT3G24210.1,AT1G04780.1  
AT4G14723.1,AT3G22820.1,AT2G30370.1  
Phypa1|16097,Phypa1|18142,Phypa1|32298,Phypa1|5583,Phypa1|14029,Phypa1|31914  
AT3G55170.1,AT3G09500.1,AT5G02610.1,AT2G39390.1 Phypa1|37230,Phypa1|2428,Phypa1|24269,Phypa1|38925  
Phypa1|17875  
AT3G59220.1,AT3G59260.1,AT2G43120.1 Phypa1|27125  
AT1G50590.1  
Phypa1|193  
AT4G37580.1,AT5G67430.1,AT2G23060.1 Phypa1|38322,Phypa1|30080  
AT2G30090.1  
AT5G06460.1,AT2G30110.1 Phypa1|26884,Phypa1|35962  
Phypa1|30058,Phypa1|28444  
AT1G80410.1 Phypa1|33246,Phypa1|37583,Phypa1|38020  
AT3G52370.1,AT2G35860.1,AT5G06390.1,AT3G11700.1 Phypa1|30527,Phypa1|509  
AT5G05650.1  
AT1G50200.1 Phypa1|28512  
AT5G22800.1 Phypa1|35977  
AT1G49930.1  
Phypa1|27709  
Phypa1|22130  
Phypa1|30997  
AT1G80350.1 Phypa1|27459,Phypa1|34742  
AT2G34560.2 Phypa1|38603  
AT3G01610.1,AT3G53230.1,AT5G08470.1,AT3G09840.1,AT1G03000.1,AT2G03670.1,AT5G03340.1  
Phypa1|24237,Phypa1|38998,Phypa1|27443,Phypa1|26726,Phypa1|29093,Phypa1|25223,Phypa1|23997,  
Phypa1|33988  
AT5G53540.1,AT4G27680.1 Phypa1|24174,Phypa1|25546  
AT2G45500.1 Phypa1|24876  
AT3G56690.1 Phypa1|36862,Phypa1|26124,Phypa1|1360  
AT2G27600.1 Phypa1|37579,Phypa1|36815  
AT3G27120.1 Phypa1|38236  
AT1G08270.2  
Phypa1|18675  
Phypa1|17148  
Phypa1|21362  
AT2G14750.1,AT4G39940.1,AT3G03900.1 Phypa1|36115,Phypa1|26235  
AT5G67520.1  
Phypa1|29379,Phypa1|39606  
Phypa1|30731  
Phypa1|31396  
AT1G54450.1,AT1G03960.1,AT5G28900.1,AT5G44090.1,AT5G28850.2  
Phypa1|37329,Phypa1|37536,Phypa1|25731,Phypa1|38715,Phypa1|23676  
AT3G25190.1,AT3G43630.1,AT1G21140.1,AT3G43660.1,AT1G76800.1 Phypa1|28145,Phypa1|14368  
AT3G62120.1 Phypa1|24740  
AT5G52520.1 Phypa1|29743  
AT5G10880.1  
Phypa1|31033  
AT3G04840.1,AT4G34670.1  
Phypa1|34787,Phypa1|38292,Phypa1|32778,Phypa1|39243,Phypa1|15252,Phypa1|36949,Phypa1|38812,  
Phypa1|2718  
AT3G49050.1,AT5G37710.1,AT4G00500.1 Phypa1|4272,Phypa1|31922,Phypa1|24767  
AT3G11670.1 Phypa1|39166,Phypa1|32841  
Phypa1|28117,Phypa1|39039  
AT5G59770.1 Phypa1|39179  
AT5G10480.1 Phypa1|38414  
AT1G58200.1,AT5G10490.1 Phypa1|25530,Phypa1|473,Phypa1|27005  
Phypa1|960  
AT1G43260.1,AT1G97940.1,AT3G13020.1,AT3G13010.1,AT3G22220.1,AT5G33406.1,AT3G17450.1,AT4G15020.1,A  
T3G13030.1 Phypa1|2091  
AT1G36095.1,AT5G31412.1

AT4G35490.1 Phypa1|39727  
 AT1G32990.1 Phypa1|28188,Phypa1|28958,Phypa1|26170  
 AT5G51610.1  
     Phypa1|31127  
 AT1G70310.1,AT1G23820.1 Phypa1|25453,Phypa1|38183  
 AT5G53120.1  
     Phypa1|2963  
     Phypa1|30852  
 AT4G31540.1,AT1G51640.1 Phypa1|24636,Phypa1|36398,Phypa1|33645,Phypa1|33423  
 AT5G03540.1,AT5G52340.1 Phypa1|32501,Phypa1|38657,Phypa1|32582  
 AT1G54090.1,AT3G14090.1,AT1G72470.1 Phypa1|456,Phypa1|1371,Phypa1|28678,Phypa1|36748,Phypa1|1778  
 AT5G52350.1  
 AT3G29400.1  
 AT5G58430.1,AT1G07000.1  
 AT3G09530.1,AT2G28650.1,AT2G28640.1,AT5G59730.1,AT3G55150.1,AT3G09520.1,AT2G39380.1,AT1G07725.1  
 AT5G61010.1,AT5G50380.1  
 AT5G13150.1,AT5G13990.1  
 AT3G52660.1,AT4G00830.1 Phypa1|39151,Phypa1|480  
 AT5G28390.1  
 AT1G03457.2,AT2G47310.1,AT4G16280.2,AT4G03110.1 Phypa1|24916,Phypa1|23970,Phypa1|28427  
     Phypa1|1464  
 AT4G16360.1 Phypa1|38878,Phypa1|36055  
 AT5G21170.1  
 AT2G28060.1  
 AT2G38630.1,AT3G54190.1 Phypa1|36185,Phypa1|23768  
     Phypa1|33192  
 AT4G27310.1,AT5G54470.1 Phypa1|20117,Phypa1|32570,Phypa1|5695,Phypa1|33646  
 AT3G21890.1  
 AT3G16480.1,AT1G51980.1 Phypa1|24887,Phypa1|38495,Phypa1|38769,Phypa1|37664  
     Phypa1|7181  
 AT3G24830.1,AT4G13170.1,AT5G48760.1,AT3G07110.2  
     Phypa1|36806,Phypa1|36680,Phypa1|39232,Phypa1|37419,Phypa1|23864  
 AT3G18660.2,AT1G77130.1 Phypa1|36183  
 AT4G33330.1  
 AT1G54940.1,AT1G08990.1  
     Phypa1|38004,Phypa1|37675  
 AT2G18730.1,AT5G57690.1,AT4G30340.1 Phypa1|29063,Phypa1|27451  
 AT1G14640.1,AT1G14650.1 Phypa1|28388,Phypa1|35949  
 AT2G43960.1,AT3G49130.1,AT4G16200.1,AT5G06520.1  
 AT5G06890.1,AT5G12280.1  
 AT1G65070.1 Phypa1|36989  
 AT5G54090.1 Phypa1|34774  
     Phypa1|22761  
     Phypa1|31293,Phypa1|22783  
 AT5G47430.1,AT4G17410.1 Phypa1|28277,Phypa1|27109  
     Phypa1|34604  
 AT2G45770.1 Phypa1|27414  
 AT5G03940.1 Phypa1|38198  
     Phypa1|31341  
 AT5G57110.1,AT4G29900.1,AT3G21180.1 Phypa1|38206,Phypa1|39535,Phypa1|2745  
 AT1G27770.1,AT4G37640.1,AT2G22950.1,AT2G41560.1,AT3G57330.1 Phypa1|25885  
 AT1G10130.1 Phypa1|39418  
 AT4G00900.1 Phypa1|38809,Phypa1|38797,Phypa1|39444  
 AT3G22910.1,AT3G63380.1  
 AT5G53010.1  
 AT1G07670.1,AT1G07810.1  
     Phypa1|25759  
     Phypa1|5663  
     Phypa1|31480  
     Phypa1|35108,Phypa1|24484,Phypa1|23784  
     Phypa1|22929  
     Phypa1|6770  
 AT2G44710.1 Phypa1|27810,Phypa1|28509,Phypa1|30100  
 AT4G31985.1,AT3G02190.1 Phypa1|36916,Phypa1|19154,Phypa1|37041  
 AT2G25210.1  
 AT2G20760.1,AT2G40060.1,AT3G51890.1 Phypa1|31773,Phypa1|778,Phypa1|4562  
     Phypa1|17021  
 AT3G17750.1,AT1G73450.1,AT1G73460.1 Phypa1|29920,Phypa1|38065,Phypa1|36503  
 AT2G40120.1  
 AT3G53030.1,AT3G44850.1,AT5G22840.1 Phypa1|975,Phypa1|965,Phypa1|63  
 AT2G17530.1,AT4G35500.2  
     Phypa1|29040  
 AT5G51920.1 Phypa1|29806,Phypa1|30663,Phypa1|24718  
 AT4G22980.1  
 AT4G37100.1,AT5G66950.1,AT2G23520.1  
     Phypa1|35957  
 AT3G09760.1,AT5G03180.1,AT5G60580.2 Phypa1|1161  
     Phypa1|27165,Phypa1|1149  
 AT4G39730.1,AT5G65158.1,AT2G22170.1 Phypa1|30229,Phypa1|28774  
 AT1G27600.1 Phypa1|2640,Phypa1|35921  
 AT2G37090.1  
 AT5G13300.1,AT5G61980.1 Phypa1|25817

Phypa1|15366  
AT1G56050.1 Phypa1|2645  
AT1G30580.1 Phypa1|39337  
AT4G25630.1,AT5G52470.1 Phypa1|28682,Phypa1|37795  
AT5G52490.1  
Phypa1|2998,Phypa1|25054,Phypa1|28234,Phypa1|8698  
AT1G55360.1,AT5G56530.1,AT2G44210.2,AT3G13510.1 Phypa1|37126,Phypa1|2986  
AT5G37520.1,AT4G15053.1,AT4G10220.1,AT2G20170.1,AT4G23350.1,AT4G15050.1,AT4G23080.1,AT2G24950.1,A  
T4G10210.1,AT1G10190.1  
AT5G36770.1,AT5G25410.1,AT2G38255.1,AT5G46810.1,AT5G46200.1,AT3G48230.1,AT2G44220.1,AT5G11660.1,A  
T5G46820.1,AT5G36680.1,AT5G25415.1,AT4G17860.1,AT2G44240.1,AT5G60380.1,AT2G35250.1,AT4G23380.1,AT  
5G05030.1,AT4G23360.1,AT4G17505.1,AT2G27320.1,AT2G17750.1,AT4G23390.1,AT5G25950.1  
AT2G03930.2,AT5G18460.1  
AT5G50150.1,AT1G70550.1,AT1G23340.1,AT1G10750.1  
AT2G44250.1,AT2G19360.1  
AT5G25960.1  
AT4G15056.1  
AT4G23370.1  
AT5G19170.1  
Phypa1|1915,Phypa1|9447  
AT2G20860.1 Phypa1|36761  
AT5G08415.1 Phypa1|38229  
Phypa1|15891  
AT2G36550.1,AT2G36540.1 Phypa1|25487,Phypa1|29143,Phypa1|38384  
AT3G29760.1  
AT4G26190.1  
AT4G08920.1 Phypa1|24416  
AT1G04400.1  
Phypa1|23142,Phypa1|31045  
Phypa1|24435  
AT5G12980.1,AT3G20800.1 Phypa1|38264,Phypa1|39504  
AT2G32550.1  
Phypa1|4074  
AT4G32180.1 Phypa1|36265,Phypa1|2777  
AT1G60440.1  
Phypa1|31572  
Phypa1|33734  
AT3G48930.1,AT4G30800.1,AT5G23740.1 Phypa1|32300,Phypa1|36178,Phypa1|36833,Phypa1|32896  
AT3G63490.1 Phypa1|34572,Phypa1|546,Phypa1|1041  
AT2G42710.1 Phypa1|33615  
AT2G29500.1,AT3G46230.1,AT1G59860.1,AT1G07400.1,AT5G59720.1,AT1G53540.1  
Phypa1|38052,Phypa1|31680,Phypa1|24748,Phypa1|38841,Phypa1|27579,Phypa1|35995,Phypa1|4230  
AT4G27670.1 Phypa1|2751,Phypa1|7354  
AT5G12020.1,AT5G12030.1 Phypa1|6271,Phypa1|38386,Phypa1|3675  
AT2G19310.1  
AT4G10250.1  
AT1G52560.1  
Phypa1|28225,Phypa1|39279,Phypa1|38001  
Phypa1|37197  
Phypa1|31987,Phypa1|1660,Phypa1|1658,Phypa1|4122,Phypa1|1669  
Phypa1|8392  
Phypa1|1619  
Phypa1|22628  
Phypa1|24894  
Phypa1|27823  
Phypa1|28727  
AT2G36060.2,AT3G52560.2 Phypa1|29910,Phypa1|38141,Phypa1|33096  
AT1G70660.1,AT1G23260.1  
AT1G10510.1 Phypa1|26753  
AT1G53530.1 Phypa1|37063  
AT3G08980.1 Phypa1|784  
AT1G23465.1  
AT2G32230.1 Phypa1|36189,Phypa1|30366,Phypa1|35933  
AT5G60430.1,AT2G16650.1  
AT1G72480.1 Phypa1|25587,Phypa1|36625  
AT1G10980.1,AT1G61670.1  
AT2G01070.1  
AT3G07565.3 Phypa1|30510,Phypa1|27359  
AT1G10820.2,AT1G68160.1,AT1G60670.1  
Phypa1|35353  
AT4G27130.1,AT5G54760.1,AT1G54290.1 Phypa1|35952,Phypa1|37921,Phypa1|38350  
AT5G54940.1  
AT3G62700.1,AT2G47800.1 Phypa1|39035  
AT3G59140.1 Phypa1|3084  
AT1G30400.1,AT1G30420.1,AT2G34660.1,AT1G30410.1 Phypa1|38010,Phypa1|37685,Phypa1|29209  
AT2G07680.1 Phypa1|27854  
AT1G04120.1 Phypa1|21854  
AT3G21250.1  
AT3G60160.1,AT3G13080.1,AT3G13100.1,AT3G13090.1  
AT1G71330.1  
Phypa1|37049  
Phypa1|28108

Phypa1|30528  
Phypa1|34052  
Phypa1|39382  
AT3G18290.1,AT1G74760.1,AT1G74770.1,AT1G18910.1 Phypa1|26956  
AT1G18920.1  
AT5G47340.1,AT4G17480.1,AT5G47330.1,AT5G47350.1,AT4G17483.1,AT3G60340.1,AT4G17470.1  
Phypa1|26987,Phypa1|36676  
AT5G59430.1,AT5G13820.1,AT3G12560.1,AT3G46590.2,AT1G07540.1,AT3G53790.1  
Phypa1|841,Phypa1|28040  
Phypa1|11631  
AT2G44970.1 Phypa1|29295,Phypa1|26320  
AT2G30280.1 Phypa1|33313  
Phypa1|34346  
AT5G10625.1,AT5G24860.1,AT4G31380.1 Phypa1|37889,Phypa1|28552  
Phypa1|24532  
AT3G28730.1 Phypa1|934  
Phypa1|25756  
AT3G26650.1,AT1G12900.1  
Phypa1|38223,Phypa1|27175,Phypa1|24225,Phypa1|29548,Phypa1|39089,Phypa1|13607  
AT1G42970.1  
AT1G35460.1,AT4G09180.1,AT1G51140.1  
Phypa1|29626,Phypa1|2180,Phypa1|34738,Phypa1|27094,Phypa1|29639  
AT1G26260.1,AT1G68920.1 Phypa1|35354,Phypa1|2112  
AT5G50915.1,AT5G48560.1  
AT3G23690.1  
AT3G57800.1  
AT5G62610.1  
Phypa1|25757  
Phypa1|14524  
Phypa1|2116,Phypa1|1566,Phypa1|29695  
Phypa1|9796,Phypa1|26767  
Phypa1|19678  
Phypa1|2182,Phypa1|2181  
Phypa1|1204,Phypa1|24714  
AT4G21470.1 Phypa1|38802  
Phypa1|31346  
Phypa1|26432  
AT2G38740.1 Phypa1|15689  
Phypa1|218  
AT4G10955.1,AT5G24230.1,AT5G24200.1,AT5G24220.1,AT2G05260.1,AT5G24210.1,AT5G24190.1,AT5G24180.1  
Phypa1|29868  
Phypa1|35814  
AT2G21600.1,AT4G39220.1 Phypa1|38444,Phypa1|35028,Phypa1|34245  
AT2G23310.1  
AT2G18240.1  
AT5G02960.1,AT3G09680.1 Phypa1|38669,Phypa1|38049,Phypa1|37242,Phypa1|37798,Phypa1|37863  
Phypa1|25239  
AT3G59050.1,AT2G43020.1 Phypa1|39333,Phypa1|38359  
AT1G65840.1  
Phypa1|3903  
AT1G63990.1 Phypa1|29409  
AT3G13170.1 Phypa1|25019  
AT5G02820.1 Phypa1|26586  
AT5G42650.1 Phypa1|38900,Phypa1|7352  
AT4G15440.1  
Phypa1|38750  
AT2G36840.1,AT2G39570.1 Phypa1|29707,Phypa1|37842,Phypa1|38326,Phypa1|18158,Phypa1|25037  
AT5G46340.1,AT2G34410.1,AT1G29890.2 Phypa1|39634,Phypa1|38760,Phypa1|3940  
AT3G06547.1  
AT3G06550.1  
AT4G28280.1,AT5G56170.1,AT2G20700.1 Phypa1|35882,Phypa1|18366,Phypa1|35143  
Phypa1|5521  
AT1G13980.1 Phypa1|27442,Phypa1|36051,Phypa1|6469  
AT5G39500.1  
AT5G19610.1  
AT3G18210.1,AT1G22950.1 Phypa1|23793,Phypa1|27075  
AT1G48740.1,AT5G43660.1,AT1G48700.1  
AT1G47940.1  
AT1G63290.1,AT3G01850.1 Phypa1|31562  
AT5G61410.1 Phypa1|25943,Phypa1|38506,Phypa1|24376  
Phypa1|30766  
AT4G32700.1 Phypa1|30698  
Phypa1|9080  
AT3G61680.1,AT3G62590.1,AT1G02660.1 Phypa1|37661,Phypa1|1815  
Phypa1|34853  
Phypa1|25367  
Phypa1|6407  
AT1G58280.2,AT2G17280.1,AT5G64460.1 Phypa1|27887,Phypa1|32687  
AT1G09935.1,AT1G09932.1  
Phypa1|27279,Phypa1|37051  
AT1G07170.1,AT2G30000.1 Phypa1|38928  
Phypa1|24228

AT1G16240.1,AT1G16230.1,AT1G79590.1 Phypa1|24373,Phypa1|37709  
AT1G16225.1  
AT1G54340.1,AT1G65930.1 Phypa1|39431  
AT5G14590.1  
Phypa1|17537  
AT1G70280.2,AT3G14860.2,AT5G14890.1,AT1G23890.2,AT1G23880.1 Phypa1|32898  
AT5G51110.1 Phypa1|3801  
AT1G29810.1 Phypa1|26357  
Phypa1|11467  
AT3G07680.1 Phypa1|27225,Phypa1|29606  
AT3G22845.1 Phypa1|28051,Phypa1|38182  
Phypa1|21472  
Phypa1|14765  
AT3G02410.1,AT5G15860.1,AT1G26120.1 Phypa1|26598,Phypa1|26894,Phypa1|28866  
Phypa1|33983  
AT5G23250.1,AT5G08300.1 Phypa1|38805,Phypa1|38642  
Phypa1|31164  
Phypa1|26171  
Phypa1|29675  
Phypa1|29718  
AT4G34390.1,AT2G23460.1,AT1G31930.1 Phypa1|37331  
Phypa1|10793  
AT4G31700.1,AT5G10360.1 Phypa1|32372,Phypa1|39572,Phypa1|29448,Phypa1|17891,Phypa1|39454  
Phypa1|1723  
AT1G22190.1,AT4G39780.1,AT1G64380.1,AT2G22200.1,AT1G78080.1,AT5G65130.1,AT1G36060.1  
Phypa1|30156,Phypa1|28768  
AT5G19790.1 Phypa1|29268,Phypa1|26630,Phypa1|28857  
AT3G61630.1,AT4G11140.1,AT5G53290.1,AT2G46310.1,AT4G27950.1,AT4G23750.1  
Phypa1|384,Phypa1|288,Phypa1|1206,Phypa1|830,Phypa1|25291,Phypa1|24735  
AT2G40350.1,AT5G05410.1,AT2G40340.1,AT3G11020.1 Phypa1|769,Phypa1|1601,Phypa1|1217  
AT3G16280.1,AT2G44940.1,AT2G35700.1,AT4G16750.1,AT5G25810.1,AT5G11590.1,AT3G60490.1,AT4G32800.1,A  
T1G77200.1 Phypa1|26031,Phypa1|25076,Phypa1|28721,Phypa1|37838  
AT5G61890.1,AT5G64750.1,AT5G50080.1,AT2G33710.1,AT5G13330.1,AT5G07310.1  
Phypa1|27785,Phypa1|884,Phypa1|886,Phypa1|25604,Phypa1|385  
AT3G20310.1,AT1G50640.1 Phypa1|28294,Phypa1|27907,Phypa1|30888,Phypa1|37185  
AT5G47230.1,AT2G44840.1,AT4G17500.1,AT5G47220.1 Phypa1|1335,Phypa1|1334,Phypa1|1331  
AT3G57600.1 Phypa1|29783,Phypa1|28480  
AT1G80580.1 Phypa1|1550,Phypa1|5793  
AT5G25190.1 Phypa1|36611,Phypa1|1186,Phypa1|10503  
AT1G24590.1,AT1G12980.1 Phypa1|25261,Phypa1|2161,Phypa1|25218,Phypa1|24606,Phypa1|26898  
AT4G28140.1,AT4G13620.1,AT2G20880.1  
AT2G20350.1  
AT1G22985.1,AT1G71130.1  
AT3G25890.1,AT1G25470.1,AT1G68550.1  
AT1G49120.1  
AT5G18450.1,AT1G75490.1  
AT2G38340.1  
AT4G25480.1,AT1G12610.1,AT2G36450.1,AT5G51990.1,AT5G52020.1,AT4G25470.1,AT1G01250.1,AT1G63030.1  
AT1G71450.1,AT1G33760.1  
AT4G34410.1,AT1G43160.1,AT3G16770.1  
AT1G03800.1  
AT5G67000.1  
AT1G53910.1  
AT1G28360.1  
AT1G53170.1,AT5G44210.1,AT3G15210.1,AT1G28370.1  
AT1G04370.1,AT3G23230.1,AT3G23220.1  
AT2G40220.1  
AT5G25390.2,AT1G15360.1,AT5G11190.1  
AT5G13910.1  
Phypa1|25603  
Phypa1|26526,Phypa1|35843,Phypa1|2085,Phypa1|1123,Phypa1|1158,Phypa1|36595,Phypa1|2205  
Phypa1|1741  
Phypa1|890  
Phypa1|490  
Phypa1|30262,Phypa1|1330,Phypa1|885  
Phypa1|26530,Phypa1|1325,Phypa1|26829,Phypa1|26359  
Phypa1|1333  
Phypa1|1337  
Phypa1|383  
Phypa1|1324  
Phypa1|889  
Phypa1|29559  
Phypa1|25114,Phypa1|28250,Phypa1|29663,Phypa1|388,Phypa1|25038  
Phypa1|1740,Phypa1|30212  
AT1G66070.1,AT5G37475.1 Phypa1|2639,Phypa1|37584,Phypa1|10178  
Phypa1|16085  
Phypa1|26783  
AT4G35770.1,AT5G66040.1 Phypa1|24335,Phypa1|36853  
AT2G17850.1,AT5G66170.2,AT2G21045.1  
AT5G46430.1,AT4G18100.1 Phypa1|24036,Phypa1|39768,Phypa1|33648,Phypa1|39108,Phypa1|38835  
AT1G76050.2 Phypa1|25500  
Phypa1|393,Phypa1|30762

AT5G54770.1 Phypa1|25130,Phypa1|33611,Phypa1|27343,Phypa1|24843,Phypa1|36025,Phypa1|24831  
Phypa1|4601  
Phypa1|9330  
AT5G34940.2 Phypa1|27797,Phypa1|23883,Phypa1|15545,Phypa1|12934  
AT5G61250.1,AT5G07830.1  
AT4G33630.1 Phypa1|25761,Phypa1|36725  
AT1G27510.1  
Phypa1|28236  
Phypa1|36577  
AT1G05960.1,AT2G41830.1,AT5G21080.1 Phypa1|27363,Phypa1|33932  
AT5G26850.1  
AT4G10450.1,AT1G33120.1,AT1G33140.1 Phypa1|37416,Phypa1|36837,Phypa1|24081,Phypa1|36618  
Phypa1|39252  
AT2G35060.2,AT1G31120.1,AT4G19960.1 Phypa1|23888,Phypa1|28218,Phypa1|39013  
AT3G02050.1  
Phypa1|5094,Phypa1|2551,Phypa1|30889,Phypa1|29440,Phypa1|28523,Phypa1|2571,Phypa1|2923,Phyp  
a1|38877,Phypa1|6885  
AT5G09400.1,AT4G33530.1  
AT4G13420.1  
AT1G60160.1  
AT4G23640.1  
AT2G40540.1,AT1G70300.1,AT5G14880.1  
AT2G30070.1  
Phypa1|37748  
AT5G59240.1,AT5G20290.1 Phypa1|37407,Phypa1|24236,Phypa1|37677,Phypa1|37695,Phypa1|38570  
Phypa1|6281  
AT5G67270.1 Phypa1|24797,Phypa1|2307,Phypa1|26234,Phypa1|26248  
AT5G62500.1,AT3G47690.1  
AT5G08100.1 Phypa1|37615  
AT3G16150.1  
Phypa1|2527,Phypa1|24779,Phypa1|39082  
AT1G24240.1,AT4G11630.1,AT5G11750.1 Phypa1|4474,Phypa1|31935,Phypa1|32729  
AT5G47190.1,AT4G17560.1  
AT3G48140.1 Phypa1|2570,Phypa1|24213,Phypa1|39459  
AT3G29970.1  
Phypa1|2227  
AT1G47560.1,AT1G47550.1 Phypa1|36302  
Phypa1|36845,Phypa1|26603  
Phypa1|10603  
AT5G27850.1,AT3G05590.1 Phypa1|31531,Phypa1|38152,Phypa1|32746,Phypa1|37902,Phypa1|38561  
AT2G47570.1  
AT1G77940.1,AT1G36240.1,AT3G18740.1  
Phypa1|38244,Phypa1|36522,Phypa1|27595,Phypa1|36942,Phypa1|38532  
AT3G10950.1 Phypa1|24277,Phypa1|2419,Phypa1|37577,Phypa1|38781,Phypa1|36404  
AT3G60245.1  
Phypa1|2535  
AT3G05170.1,AT1G08940.1 Phypa1|192,Phypa1|36258  
Phypa1|25024,Phypa1|31891  
AT3G58610.1 Phypa1|29229,Phypa1|24234  
Phypa1|17082  
Phypa1|31182  
AT1G11680.1 Phypa1|27738  
AT3G20840.1,AT1G72570.1,AT5G17430.1,AT1G51190.1,AT5G10510.1,AT5G57390.1,AT5G65510.1  
Phypa1|26676,Phypa1|37219,Phypa1|28029  
AT1G16060.1,AT1G79700.1,AT2G41710.2,AT5G60120.1,AT4G36920.1,AT2G39250.1,AT3G54990.1,AT2G28550.1,AT  
4G37750.1,AT5G67180.1,AT3G54320.1  
Phypa1|10770,Phypa1|25663,Phypa1|29801,Phypa1|2042,Phypa1|26852,Phypa1|29523,Phypa1|26674  
Phypa1|1083  
Phypa1|9832  
AT4G32010.1,AT2G30470.1 Phypa1|26045  
AT4G21550.1  
Phypa1|8110,Phypa1|18078,Phypa1|17124  
Phypa1|25640  
AT5G41940.1,AT3G49350.1,AT5G53570.1,AT5G24390.1 Phypa1|1401,Phypa1|25849  
AT3G20540.1,AT1G50840.1 Phypa1|37955,Phypa1|23846,Phypa1|39749  
AT2G13350.1,AT1G04540.1,AT2G33320.1,AT4G01200.1,AT3G04360.1 Phypa1|34914,Phypa1|32511  
AT2G44950.1 Phypa1|30365,Phypa1|29075,Phypa1|25026,Phypa1|39427,Phypa1|38572  
AT1G55250.1  
AT1G55255.1  
AT1G20970.1 Phypa1|34814,Phypa1|35519  
AT4G27500.1  
AT3G55140.1,AT3G09540.1 Phypa1|38494  
AT4G24780.1,AT4G13210.1,AT3G53190.1,AT4G13710.1,AT5G04310.1,AT3G07010.1,AT3G27400.1,AT3G24670.1,AT  
1G04680.1,AT3G24230.1,AT1G67750.1,AT5G48900.1,AT5G63180.1  
Phypa1|3091,Phypa1|27683,Phypa1|19990,Phypa1|36721,Phypa1|38833,Phypa1|28633  
AT1G11920.1,AT1G30350.1,AT4G22090.1,AT4G22080.1  
AT5G15110.1,AT3G01270.1,AT3G54920.1,AT2G02720.1,AT1G14420.1  
AT5G55720.1  
AT5G09280.1  
Phypa1|28956,Phypa1|27317,Phypa1|36463,Phypa1|24328,Phypa1|25515,Phypa1|2853,Phypa1|20813,Ph  
ypa1|2852,Phypa1|39332  
Phypa1|27323,Phypa1|9272,Phypa1|35630,Phypa1|17609

Phypa1|26891  
Phypa1|21296,Phypa1|7018  
Phypa1|24447  
Phypa1|713  
Phypa1|28588  
AT2G24420.1,AT4G31340.1 Phypa1|33744,Phypa1|1039,Phypa1|1986  
Phypa1|1974,Phypa1|17944  
AT5G44180.1,AT4G12750.1,AT1G28420.1 Phypa1|4881  
Phypa1|35730  
AT5G35170.1 Phypa1|1853  
AT5G47840.1 Phypa1|29068,Phypa1|25003  
AT3G57550.2,AT2G41880.1 Phypa1|39326,Phypa1|29732,Phypa1|28251,Phypa1|26152  
Phypa1|20338  
AT3G13070.1,AT1G55930.1 Phypa1|28272,Phypa1|38185,Phypa1|33034  
Phypa1|23345,Phypa1|22608,Phypa1|20520,Phypa1|22545  
AT3G27970.1,AT5G40310.1,AT2G48100.1 Phypa1|27246  
AT3G15080.1 Phypa1|28906  
AT2G47410.1 Phypa1|36149  
AT5G49430.1  
AT5G23430.1,AT5G08390.1 Phypa1|946,Phypa1|27495  
AT1G61210.1  
AT1G11160.1  
Phypa1|785  
AT3G15980.3,AT1G79990.1,AT1G52360.1 Phypa1|29365,Phypa1|38664  
Phypa1|33404  
Phypa1|3476  
AT1G80920.1  
Phypa1|33684,Phypa1|30245,Phypa1|32481,Phypa1|34228,Phypa1|37085,Phypa1|29220,Phypa1|27657  
AT1G72070.1  
Phypa1|5158,Phypa1|31961  
Phypa1|5159  
AT4G07400.1,AT5G67250.1,AT3G50080.1,AT1G47056.1 Phypa1|77,Phypa1|26736  
AT5G22000.1 Phypa1|24952  
AT4G14220.1  
Phypa1|28439,Phypa1|1245  
AT5G36880.1 Phypa1|20689,Phypa1|9296  
Phypa1|31469,Phypa1|31300  
Phypa1|2609  
Phypa1|31216  
AT1G65580.1,AT2G43900.1,AT2G31830.1,AT1G05630.1 Phypa1|29358  
AT5G07270.1 Phypa1|38628,Phypa1|29470,Phypa1|943  
AT5G57740.1  
AT5G18640.1,AT5G18630.1 Phypa1|36609,Phypa1|37366,Phypa1|37259  
Phypa1|21380  
AT2G42810.2 Phypa1|23866  
AT2G39840.1 Phypa1|18631,Phypa1|38512,Phypa1|32096,Phypa1|38904  
AT5G63870.1 Phypa1|27236,Phypa1|28977,Phypa1|38914  
AT1G59830.1,AT1G69960.1,AT1G10430.1 Phypa1|39635,Phypa1|37030  
AT1G50370.1,AT3G19980.1 Phypa1|37600,Phypa1|38431  
AT2G42500.1,AT3G58500.1 Phypa1|33546,Phypa1|24173  
AT4G26720.1,AT5G55260.1 Phypa1|38073,Phypa1|34725  
AT4G11240.1,AT1G64040.1  
AT5G43380.1  
AT5G59160.1,AT3G46820.1,AT2G29400.1  
AT5G27840.2,AT3G05580.1  
AT5G10900.1  
AT1G48120.1  
Phypa1|23879  
Phypa1|2810  
Phypa1|33547  
AT5G08130.1,AT5G38860.1,AT1G69010.1 Phypa1|1519  
AT1G12320.1,AT2G45360.1,AT3G60780.1,AT1G62840.1 Phypa1|35055,Phypa1|34791  
AT5G62280.1  
AT3G61860.1,AT4G25500.1,AT5G52040.2 Phypa1|34087  
AT2G46610.1  
AT1G18330.1,AT5G17300.1,AT5G37260.1,AT3G10113.1 Phypa1|27370  
AT1G01060.1,AT2G46830.1  
AT3G51160.1,AT5G66280.1 Phypa1|28677,Phypa1|2474,Phypa1|27566,Phypa1|39730  
Phypa1|30735  
Phypa1|21639  
Phypa1|6129  
Phypa1|30878  
AT3G08530.1,AT3G11130.1 Phypa1|39739,Phypa1|31625,Phypa1|34109  
Phypa1|29599  
AT5G20010.1,AT5G20020.1,AT5G55190.1  
Phypa1|39467,Phypa1|36459,Phypa1|32720,Phypa1|24842,Phypa1|38409  
AT5G55080.1  
Phypa1|2524  
AT5G54640.1,AT3G20670.1,AT4G27230.1,AT1G51060.1 Phypa1|28248,Phypa1|32807  
AT1G52740.1,AT3G54560.1 Phypa1|36478,Phypa1|39659,Phypa1|29121  
AT1G08880.1,AT1G54690.1 Phypa1|36584,Phypa1|2910,Phypa1|295  
AT2G38810.1



AT4G13570.1  
Phypa1|27784,Phypa1|23857  
Phypa1|30829  
Phypa1|8135  
AT1G07960.1 Phypa1|810  
AT2G47470.1 Phypa1|28923  
AT1G05690.1,AT4G37610.1,AT5G67480.2 Phypa1|29945,Phypa1|39493,Phypa1|20131  
AT3G48360.1,AT5G63160.1  
AT1G30480.1 Phypa1|35192  
AT1G62640.1 Phypa1|27836,Phypa1|27195,Phypa1|24891  
Phypa1|21651,Phypa1|23530,Phypa1|31142  
Phypa1|23028  
AT5G57500.1 Phypa1|1997,Phypa1|1995  
AT2G42490.1 Phypa1|36361,Phypa1|36231,Phypa1|28689  
Phypa1|20111,Phypa1|36003  
AT1G62450.1,AT1G12070.1,AT3G07880.1 Phypa1|26695,Phypa1|37567,Phypa1|26703  
Phypa1|18429  
AT1G09210.1,AT1G56340.1 Phypa1|2595,Phypa1|33193  
AT1G08450.1  
AT1G65060.1,AT3G21240.1 Phypa1|28542,Phypa1|23721,Phypa1|36766,Phypa1|15703  
AT4G05160.1 Phypa1|38608,Phypa1|25927,Phypa1|24646,Phypa1|24910  
AT3G48990.1 Phypa1|25196  
AT3G16170.1 Phypa1|37465  
AT1G62940.1 Phypa1|30086,Phypa1|11558  
AT1G30520.1 Phypa1|26308  
AT1G51680.1,AT3G21230.1  
AT1G20500.1,AT1G20480.1,AT5G38120.1,AT1G20510.1,AT1G20490.1  
AT4G19010.1  
AT5G63380.1  
Phypa1|30251  
Phypa1|21562,Phypa1|31108  
Phypa1|25917  
AT3G52190.1 Phypa1|32172,Phypa1|24611  
AT2G01470.1,AT5G50550.1,AT5G50650.1 Phypa1|39202,Phypa1|30700  
AT3G27090.1,AT5G42050.1 Phypa1|37436,Phypa1|35954,Phypa1|24660  
AT2G35140.1  
AT2G35390.2,AT2G44530.1,AT1G32380.1 Phypa1|37354,Phypa1|26053,Phypa1|30541,Phypa1|13027  
Phypa1|29039  
AT4G14000.1 Phypa1|38549,Phypa1|27749  
AT2G43320.1  
AT3G04610.1 Phypa1|1861,Phypa1|1839  
AT4G26000.1  
AT3G20230.1 Phypa1|39054  
Phypa1|2137  
AT4G13610.1,AT4G08990.1,AT4G14140.1,AT5G49160.1 Phypa1|1747  
AT1G27200.1,AT3G27330.1,AT4G37420.1,AT5G40720.1 Phypa1|30129,Phypa1|37322,Phypa1|2887,Phypa1|632  
Phypa1|6468  
AT1G34130.1 Phypa1|36988  
AT5G19690.1 Phypa1|38090  
Phypa1|20760  
AT4G35220.1,AT1G44542.1,AT4G34180.1 Phypa1|27418  
AT1G51070.1,AT5G54680.1 Phypa1|37760,Phypa1|4736,Phypa1|29238  
AT4G14410.1,AT3G23210.1  
AT1G22450.1,AT5G57815.1,AT4G28060.1 Phypa1|30394,Phypa1|2233  
AT1G32710.1  
AT5G36270.1,AT1G75270.1,AT5G16710.1,AT1G19570.1 Phypa1|2533  
AT1G19550.1  
Phypa1|39492  
Phypa1|17545  
AT5G17640.1 Phypa1|39424,Phypa1|26012,Phypa1|36076  
AT1G10020.1,AT4G29310.1,AT3G19680.1,AT1G50040.1  
AT3G13700.1 Phypa1|28018  
AT3G21215.1 Phypa1|29514  
AT2G42240.1  
AT3G55730.1,AT2G39880.1,AT3G09230.1 Phypa1|26855,Phypa1|26337  
AT3G60460.1 Phypa1|2169,Phypa1|1603  
AT5G15310.1,AT3G61250.1,AT3G01140.1 Phypa1|596,Phypa1|29971,Phypa1|35925  
AT5G56110.1 Phypa1|1184,Phypa1|38491,Phypa1|1574  
AT5G16600.1,AT1G66230.1,AT5G14340.1,AT4G22680.1,AT5G62320.1  
Phypa1|33390,Phypa1|20984,Phypa1|1513  
AT4G37260.1,AT2G23290.1,AT3G50060.1,AT5G67300.1 Phypa1|274,Phypa1|24768  
AT3G11440.1,AT5G06100.2,AT2G32460.1 Phypa1|1598,Phypa1|1599  
AT5G11510.1,AT4G32730.2 Phypa1|27842,Phypa1|25823  
AT1G26780.1,AT1G69560.1  
Phypa1|29119,Phypa1|27302,Phypa1|269,Phypa1|655,Phypa1|25978,Phypa1|265,Phypa1|272  
AT3G27785.1,AT4G18770.1,AT5G11050.1,AT5G58850.1 Phypa1|2192,Phypa1|2191,Phypa1|1289  
AT4G01680.2,AT1G09540.1,AT1G57560.1,AT5G26660.1 Phypa1|25392,Phypa1|29033  
AT2G47460.1,AT4G21440.1,AT5G16770.1,AT2G31180.1,AT5G49330.1,AT3G13540.1,AT3G02940.1,AT3G23250.1,A  
T1G35515.1,AT3G62610.1  
AT4G17785.1,AT4G28110.1,AT4G05100.1,AT5G65230.1,AT5G10280.1,AT1G34670.1  
AT1G16490.1,AT1G79180.1,AT1G56160.1,AT3G12820.1  
AT3G27810.1,AT5G54230.1,AT3G06490.1,AT2G47190.1,AT3G30210.1

AT1G74650.1,AT3G28910.1,AT3G47600.1,AT5G62470.2  
AT1G74080.1  
AT4G37780.1,AT5G65790.1,AT3G49690.1,AT2G36890.1,AT5G57620.1,AT5G23000.1  
AT4G34990.1  
AT1G18960.1,AT3G28470.1  
AT2G16720.1,AT4G09460.1,AT4G38620.1  
AT1G48000.1,AT5G49620.1,AT1G25340.1,AT3G46130.1,AT1G68320.1,AT3G24310.1,AT4G13480.1  
AT1G06180.1  
AT2G26960.1,AT2G26950.1,AT5G55020.1  
AT5G40350.1,AT5G59780.3,AT3G01530.1  
AT4G26930.1  
AT2G25230.1,AT5G40430.1  
AT3G09370.1,AT5G02320.1  
AT1G14350.1,AT2G02820.2  
AT4G00540.1  
AT3G29020.1  
AT1G73410.1,AT1G17950.1  
AT5G17800.1  
AT4G33450.1  
AT5G39700.1  
AT5G40360.1  
AT4G25560.1,AT5G12870.1  
AT3G08500.1  
AT3G12720.1,AT3G13890.1  
AT1G63910.1  
Phypa1|1439  
Phypa1|3034,Phypa1|26126,Phypa1|30093,Phypa1|27601  
Phypa1|24333,Phypa1|24427  
Phypa1|28190,Phypa1|28960,Phypa1|26159,Phypa1|179,Phypa1|29727  
Phypa1|28330  
Phypa1|28974  
Phypa1|15841,Phypa1|310,Phypa1|823  
AT3G19770.1,AT5G09320.1 Phypa1|36517  
AT3G24170.1 Phypa1|39008  
AT3G54660.1 Phypa1|24970  
AT1G30450.1 Phypa1|24613,Phypa1|36073,Phypa1|38347,Phypa1|39113  
Phypa1|25837,Phypa1|27581,Phypa1|36182  
AT5G53040.1,AT5G66990.1,AT1G74480.1,AT4G35590.1,AT1G18790.1 Phypa1|22403  
AT4G19645.1,AT4G10360.1,AT1G31300.1 Phypa1|24340,Phypa1|26552  
AT3G59920.1,AT2G44100.1 Phypa1|38913,Phypa1|24134,Phypa1|24176,Phypa1|39215  
AT5G09550.1  
AT1G46264.1 Phypa1|27151  
AT4G17750.1,AT3G02990.1,AT1G32330.1,AT5G16820.1 Phypa1|24035,Phypa1|38834  
AT2G41690.1,AT4G36990.1,AT5G62020.1  
AT4G11660.1  
AT1G67970.1,AT3G22830.1  
AT3G63350.1,AT3G51910.1,AT2G26150.1  
AT3G24520.1  
AT4G13980.1,AT4G18880.1  
AT5G43840.1  
AT5G03720.1  
AT4G19630.1  
Phypa1|38224,Phypa1|1702  
Phypa1|1700  
Phypa1|1901,Phypa1|38435  
AT3G49010.1,AT3G48960.1,AT5G23900.1  
Phypa1|36501,Phypa1|39748,Phypa1|36613,Phypa1|39051,Phypa1|38327  
AT1G26630.1,AT1G69410.1,AT1G13950.1 Phypa1|14679  
Phypa1|30797  
AT4G18380.1,AT5G46170.1,AT1G30200.1 Phypa1|32832,Phypa1|37148  
AT1G22220.1,AT1G78100.1  
AT1G10760.1 Phypa1|26897,Phypa1|35994  
AT4G24450.1  
AT1G72370.1 Phypa1|37608,Phypa1|1991,Phypa1|26501,Phypa1|23798,Phypa1|2475  
AT3G04770.1  
AT2G47510.1,AT5G50950.1 Phypa1|23694,Phypa1|36512  
Phypa1|30843  
Phypa1|30808,Phypa1|30763,Phypa1|3101  
Phypa1|21488  
AT1G09690.1,AT1G09590.1,AT1G57860.1,AT1G57660.1  
Phypa1|35280,Phypa1|31512,Phypa1|23902,Phypa1|38875  
AT1G69800.1 Phypa1|25061  
AT3G48530.1  
AT4G05530.1 Phypa1|38450  
AT2G29150.1,AT2G29370.1,AT5G06060.1,AT2G29360.1,AT2G29260.1,AT1G07440.1,AT2G29330.1,AT2G29290.1,A  
T2G29350.1 Phypa1|39745  
AT2G30670.1,AT2G29300.1,AT2G29310.1,AT2G29340.1,AT2G29320.1,AT1G07450.1  
AT2G29170.1  
Phypa1|30925  
Phypa1|35851,Phypa1|31358  
Phypa1|30040,Phypa1|21729  
Phypa1|31109

Phypa1|22876  
Phypa1|22180  
AT5G55390.1 Phypa1|35363  
AT5G48090.1  
AT3G51770.2,AT5G58550.1 Phypa1|10998,Phypa1|24883  
AT4G02680.1  
AT3G03780.1,AT5G17920.1,AT5G20980.1 Phypa1|38448,Phypa1|38379,Phypa1|39684  
Phypa1|16587  
Phypa1|31416  
Phypa1|8754  
AT1G14790.1 Phypa1|39241  
AT3G49500.1 Phypa1|9  
AT4G11130.1  
AT2G05370.1  
AT5G56600.1,AT4G29340.1,AT2G19760.1,AT2G19770.1,AT4G29350.1  
Phypa1|35941,Phypa1|38383,Phypa1|35416,Phypa1|2575  
AT5G51820.1 Phypa1|23991,Phypa1|23923  
AT1G70730.1,AT1G23190.1 Phypa1|35950,Phypa1|37434  
AT5G11480.1 Phypa1|16373,Phypa1|25866  
AT2G22870.1  
Phypa1|30882  
AT4G15410.1,AT4G22150.1,AT4G04210.1 Phypa1|27270  
AT3G21660.1  
Phypa1|13090,Phypa1|617  
AT3G19690.1,AT2G14610.1,AT4G33720.1,AT2G14580.1 Phypa1|37640,Phypa1|15215  
AT4G25790.1,AT4G30320.1,AT5G57625.1 Phypa1|3095,Phypa1|2160  
AT5G02730.1,AT3G09590.1  
AT4G33710.1,AT5G26130.1  
AT4G07820.1  
AT1G01310.1,AT4G25780.1  
AT4G31470.1  
AT1G50050.1  
AT4G33730.1  
Phypa1|1234  
Phypa1|38449,Phypa1|20645,Phypa1|37883  
AT2G26800.2 Phypa1|27999,Phypa1|2851  
Phypa1|30689,Phypa1|30931  
Phypa1|38892  
AT1G17530.1,AT1G72750.1,AT3G04800.1 Phypa1|1572,Phypa1|1571  
AT1G23400.1 Phypa1|28400  
AT5G54890.1,AT4G31010.1,AT2G20020.1  
Phypa1|46  
Phypa1|25986  
AT2G25870.1 Phypa1|9642  
Phypa1|31261,Phypa1|31365  
Phypa1|395  
Phypa1|9643  
AT1G32583.1,AT4G24972.1 Phypa1|2163,Phypa1|27474  
Phypa1|9476,Phypa1|33924,Phypa1|11209  
Phypa1|16382  
AT4G33380.1 Phypa1|34351,Phypa1|33852  
Phypa1|32950,Phypa1|35511  
Phypa1|34592  
Phypa1|31811  
AT4G17740.1 Phypa1|28896  
AT3G57680.1 Phypa1|28379  
Phypa1|6427  
Phypa1|31172  
AT2G31320.1 Phypa1|37102  
AT4G02390.1 Phypa1|30081  
AT5G22470.1 Phypa1|9119  
Phypa1|26593  
AT4G26500.1 Phypa1|1061,Phypa1|580  
AT1G55805.1  
Phypa1|1694  
Phypa1|15706  
AT3G59310.2,AT3G59320.1,AT3G59340.1 Phypa1|605  
AT3G59330.1  
AT1G72880.1 Phypa1|156,Phypa1|1971  
AT4G14930.1  
Phypa1|38843  
AT4G27070.1,AT5G54810.1 Phypa1|24486,Phypa1|4609,Phypa1|36241  
AT5G28237.1  
Phypa1|25504  
Phypa1|22473  
AT2G42320.1,AT3G01810.1,AT3G57780.1,AT5G43230.1,AT5G06930.1 Phypa1|1776,Phypa1|27084  
AT1G64140.1 Phypa1|443,Phypa1|439  
AT5G09670.1,AT5G64550.1  
AT3G27770.1,AT2G47115.1,AT1G70505.1,AT5G62960.1,AT1G10660.1 Phypa1|36552,Phypa1|32974  
AT2G47400.1,AT3G62410.1 Phypa1|28435,Phypa1|25424,Phypa1|25877  
AT1G76560.1  
Phypa1|34327

AT1G76490.1,AT2G17370.1 Phypa1|9213,Phypa1|35912,Phypa1|39110  
 AT3G10610.1,AT2G04390.1,AT5G04800.1,AT2G05220.1  
 Phypa1|1646,Phypa1|7434,Phypa1|24455,Phypa1|31534,Phypa1|38518  
 Phypa1|25442  
 AT3G15540.1,AT5G65670.1,AT1G04240.1,AT4G14550.1,AT3G23050.1,AT3G23030.1,AT5G43700.1,AT2G22670.1,A  
 T3G04730.1,AT4G14560.1,AT1G04250.1,AT4G29080.1 Phypa1|39253,Phypa1|36780  
 AT3G62100.1,AT3G16500.1,AT1G04100.1,AT1G51950.1,AT4G32280.1,AT2G46990.1,AT4G28640.1,AT5G25890.1,A  
 T2G33310.2,AT1G15580.1,AT1G52830.1,AT1G04550.2,AT3G17600.1  
 AT2G01200.2,AT1G15050.1,AT1G80390.1  
 AT3G49910.1,AT5G67510.1  
 Phypa1|25597,Phypa1|28434,Phypa1|27844,Phypa1|26759,Phypa1|33056,Phypa1|4704  
 Phypa1|2658  
 AT2G30530.1,AT5G01970.1,AT4G02800.1,AT1G30050.1 Phypa1|1721  
 AT3G55280.1,AT2G39460.1 Phypa1|2122,Phypa1|38565,Phypa1|38127,Phypa1|39143  
 AT1G62880.1,AT1G12390.1,AT1G12340.1,AT4G12090.1 Phypa1|33535,Phypa1|38815  
 AT3G12180.1  
 AT3G04920.1,AT5G28060.1 Phypa1|30717,Phypa1|30718,Phypa1|28950,Phypa1|24991,Phypa1|32531  
 AT2G38185.4,AT5G01450.1 Phypa1|34729,Phypa1|34192  
 AT2G38220.1  
 Phypa1|11757  
 AT5G19420.1,AT5G12350.1 Phypa1|26295,Phypa1|27946,Phypa1|27935  
 AT5G48330.1 Phypa1|18905  
 AT3G47660.1,AT1G65920.1,AT5G60870.1,AT3G23270.1,AT1G27060.1,AT3G15430.1,AT1G76950.1,AT3G26100.2,A  
 T5G08710.1,AT5G42140.1,AT3G02510.1,AT4G14370.1,AT5G63860.1,AT5G16040.1 Phypa1|38597  
 AT1G69710.1  
 Phypa1|29233,Phypa1|6044,Phypa1|29960,Phypa1|35313,Phypa1|37757,Phypa1|26752  
 AT1G07350.1 Phypa1|1521,Phypa1|29276  
 Phypa1|1257  
 AT1G16610.1 Phypa1|14611,Phypa1|33859,Phypa1|23772  
 AT1G79100.1  
 Phypa1|23047  
 AT2G20050.1 Phypa1|36851,Phypa1|36912  
 AT3G06270.1  
 Phypa1|986  
 AT2G37410.1,AT1G20350.1 Phypa1|37897  
 AT5G11690.1  
 AT5G26570.1 Phypa1|36326,Phypa1|23670  
 Phypa1|9530  
 AT5G62410.1,AT3G47460.1 Phypa1|26322  
 AT5G48600.1 Phypa1|24475  
 AT2G37250.1,AT2G39270.1 Phypa1|30235,Phypa1|29278  
 AT3G01820.1  
 AT1G07660.1 Phypa1|37786  
 AT1G07820.1  
 AT3G53730.1  
 AT5G59970.1  
 AT2G28740.1  
 AT5G59690.1  
 AT3G46320.1  
 AT3G45930.1  
 Phypa1|2492  
 Phypa1|2979  
 Phypa1|30194  
 Phypa1|14899  
 Phypa1|29591  
 Phypa1|28057  
 Phypa1|27791  
 Phypa1|34573  
 Phypa1|27465  
 Phypa1|30352  
 Phypa1|2772  
 Phypa1|2725  
 AT1G26110.1 Phypa1|34591,Phypa1|32486  
 AT4G19360.1,AT5G45330.1  
 Phypa1|32485,Phypa1|11523  
 AT2G27100.1 Phypa1|26259,Phypa1|27594  
 Phypa1|20477  
 AT4G25440.1,AT5G51980.2 Phypa1|105,Phypa1|104  
 AT5G49200.1,AT5G40880.1  
 AT5G35700.1,AT5G55400.1,AT5G48460.1,AT2G04750.1,AT4G26700.1 Phypa1|39494,Phypa1|37934  
 AT2G46240.1 Phypa1|33771,Phypa1|31613,Phypa1|33102  
 AT1G12060.1  
 Phypa1|34349,Phypa1|32235  
 Phypa1|17359  
 AT2G18510.1 Phypa1|24056,Phypa1|33947,Phypa1|36759,Phypa1|27728  
 AT4G34110.1,AT2G35410.1,AT5G03580.1,AT2G37220.1,AT1G49760.1,AT1G71770.1,AT1G60000.1,AT1G34140.1,A  
 T3G19350.1,AT4G09040.1  
 AT1G24610.1 Phypa1|38503  
 Phypa1|31982  
 AT2G22400.1,AT4G40000.1 Phypa1|463  
 AT5G05350.1,AT3G10980.1 Phypa1|39631,Phypa1|1836,Phypa1|56  
 Phypa1|76

AT5G19680.1 Phypa1|14161,Phypa1|33488  
Phypa1|3983  
AT5G65990.1,AT2G42005.1,AT4G38250.1 Phypa1|25010  
AT3G11900.1 Phypa1|6842,Phypa1|29027  
Phypa1|548  
AT5G63190.1 Phypa1|2542,Phypa1|26839,Phypa1|29066  
AT1G22730.1  
AT4G24800.1  
AT3G48390.1  
AT1G63010.1,AT4G11810.1,AT4G22990.1 Phypa1|37943  
Phypa1|36814,Phypa1|37471,Phypa1|34166,Phypa1|38557  
AT4G32551.1,AT2G32700.1 Phypa1|26132  
Phypa1|30305  
Phypa1|1528  
AT2G26180.1,AT1G72670.1  
Phypa1|29280,Phypa1|672,Phypa1|29377,Phypa1|1116,Phypa1|30315,Phypa1|1837  
AT3G51380.1  
AT3G22190.1  
AT5G03040.1,AT3G09710.1,AT3G52290.1  
AT3G49260.1  
AT1G17480.1  
AT3G59690.1  
AT4G14750.1  
AT5G03960.1,AT2G26410.1,AT5G13460.1  
AT3G49380.1  
AT3G15050.1,AT2G33990.1  
Phypa1|4079,Phypa1|34440  
Phypa1|6991  
AT5G43560.1,AT1G04300.1 Phypa1|505,Phypa1|100  
AT4G16045.1,AT5G52330.1  
AT5G20350.1 Phypa1|39128  
AT2G14250.1  
AT2G14255.1  
Phypa1|1474  
AT5G53470.1,AT4G27780.1 Phypa1|27046,Phypa1|25323,Phypa1|30096  
Phypa1|32609  
AT5G06580.1 Phypa1|38552,Phypa1|36139  
Phypa1|30674,Phypa1|30847  
Phypa1|30978  
AT1G54490.1,AT5G42540.1,AT1G75660.1 Phypa1|38147  
AT1G18420.1,AT3G18440.1,AT1G68600.1,AT1G25480.1,AT2G17470.1 Phypa1|33529,Phypa1|3936  
AT2G17410.1,AT1G76510.1,AT1G20910.1 Phypa1|479,Phypa1|26665  
AT1G61640.1,AT1G11390.1 Phypa1|38854  
Phypa1|26387,Phypa1|26360  
AT3G45770.1 Phypa1|25387  
Phypa1|21031,Phypa1|37431,Phypa1|32118  
Phypa1|34343,Phypa1|32186  
AT4G36530.2 Phypa1|26428  
AT5G19850.1 Phypa1|30984  
AT2G30050.1,AT3G01340.1 Phypa1|37469,Phypa1|27315,Phypa1|35298,Phypa1|27485  
AT1G03060.1,AT4G02660.1 Phypa1|26847,Phypa1|28698,Phypa1|33760  
Phypa1|32926  
AT1G26910.1,AT1G66580.1,AT1G14320.1 Phypa1|35504,Phypa1|36195,Phypa1|39733,Phypa1|24411  
Phypa1|11804  
AT5G08520.1 Phypa1|1142,Phypa1|29471  
AT5G05790.1,AT3G11280.1,AT5G01200.1,AT2G38090.1,AT5G58900.1  
AT5G23650.1,AT1G49010.1  
AT1G19510.1,AT4G39250.1,AT4G36570.1,AT2G21650.1,AT1G75250.1  
AT3G10585.1,AT3G10580.1,AT3G10590.1,AT5G04760.1,AT4G09450.1  
AT3G10595.1  
AT5G47290.1  
AT1G03905.1,AT5G44110.1 Phypa1|36354  
AT5G02270.1 Phypa1|39207  
ATCG00190.1 Phypa1|22670,Phypa1|22916  
AT2G24100.1,AT4G30780.1 Phypa1|1165,Phypa1|1167  
AT1G54300.1,AT3G05770.1  
AT4G00100.1,AT3G60770.1 Phypa1|36091,Phypa1|24147,Phypa1|38903  
Phypa1|36470  
AT1G28350.1,AT2G33840.1 Phypa1|36081  
Phypa1|9499  
AT4G38890.1 Phypa1|29122  
Phypa1|8034  
AT3G03880.1,AT1G55340.1 Phypa1|4091,Phypa1|27436,Phypa1|36264,Phypa1|37117,Phypa1|35330  
AT4G27585.1,AT5G54100.1 Phypa1|541  
AT5G04130.1,AT3G10270.1 Phypa1|30981,Phypa1|39501  
AT5G04110.1  
Phypa1|30896,Phypa1|391  
AT5G08110.1 Phypa1|25360  
Phypa1|30817  
AT2G32040.1 Phypa1|28482,Phypa1|34973,Phypa1|1402  
AT2G40820.1,AT2G26770.1,AT3G56480.1  
Phypa1|25012,Phypa1|38885,Phypa1|29357,Phypa1|26256,Phypa1|29184

AT2G43160.1,AT3G59290.1 Phypa1|32399  
     Phypa1|25001,Phypa1|36412  
 AT5G04240.1,AT3G48430.1 Phypa1|34029,Phypa1|32671  
 AT1G05190.1 Phypa1|38110,Phypa1|24195  
 AT2G18400.1  
     Phypa1|31276  
 AT5G41390.1,AT1G63830.1,AT4G23470.1 Phypa1|36252  
 AT1G13180.1 Phypa1|27651,Phypa1|23875  
 AT3G12110.1,AT5G09810.1,AT3G53750.1,AT2G37620.1  
     Phypa1|39608,Phypa1|35597,Phypa1|23988,Phypa1|37983,Phypa1|39301,Phypa1|24096,Phypa1|39655,  
 Phypa1|39668  
 AT1G18450.1 Phypa1|37730,Phypa1|2679  
 AT3G60830.1 Phypa1|2948,Phypa1|24522  
 AT3G27000.1 Phypa1|36134  
 AT3G33520.1 Phypa1|26584  
 AT2G42100.1,AT3G18780.2,AT1G49240.1  
 AT2G42170.1,AT5G59370.1,AT3G46520.1  
 AT5G56180.1,AT2G42090.1  
 AT1G73910.1  
 AT3G20810.2 Phypa1|27571  
     Phypa1|18034  
     Phypa1|32524,Phypa1|4186,Phypa1|32072  
 AT1G03350.1 Phypa1|35554,Phypa1|17979  
 AT4G13110.1  
 AT2G46500.1,AT5G24240.1 Phypa1|29404,Phypa1|38796  
 AT1G64460.1  
 AT1G64470.1  
 AT3G43950.1  
 AT5G58980.1,AT1G07380.1,AT2G38010.2 Phypa1|17127,Phypa1|2502  
 AT1G08360.1,AT5G22440.1,AT2G27530.1 Phypa1|24132,Phypa1|36419,Phypa1|24258  
 AT1G10050.1,AT4G08160.1,AT1G58370.1 Phypa1|18969,Phypa1|18968,Phypa1|39030  
 AT5G55000.2 Phypa1|37073  
     Phypa1|2302,Phypa1|2300,Phypa1|29654,Phypa1|26410  
     Phypa1|33206  
     Phypa1|3055  
     Phypa1|4610  
     Phypa1|173  
 AT1G67430.1,AT1G27400.1 Phypa1|27404,Phypa1|36192,Phypa1|33644,Phypa1|30291,Phypa1|25915  
 AT1G33360.1,AT5G53350.1 Phypa1|27438,Phypa1|447,Phypa1|423  
 AT5G49840.1  
     Phypa1|30880  
 AT3G48170.1,AT1G74920.1 Phypa1|38349  
 AT2G14170.1 Phypa1|38382  
 AT1G79440.1 Phypa1|24634,Phypa1|35187  
 AT3G66658.2 Phypa1|30814,Phypa1|25191  
 AT1G54100.1 Phypa1|24219  
 AT1G23800.1,AT3G48000.1 Phypa1|30894  
 AT3G24503.1  
     Phypa1|30032  
     Phypa1|30950,Phypa1|31088  
     Phypa1|31290  
     Phypa1|30436,Phypa1|21723  
     Phypa1|23002,Phypa1|30725  
     Phypa1|30823,Phypa1|21960  
     Phypa1|38969,Phypa1|30841,Phypa1|31120  
     Phypa1|20915  
     Phypa1|3086  
     Phypa1|29257,Phypa1|1307  
     Phypa1|27335  
     Phypa1|21566  
     Phypa1|20546  
     Phypa1|30822  
     Phypa1|30453  
 AT2G03050.1,AT2G34620.1 Phypa1|27043  
 AT3G18870.1  
 AT2G36000.1  
     Phypa1|1485  
 AT1G58250.1 Phypa1|35073  
 AT5G49670.1  
 AT5G49680.1  
 AT4G17640.1,AT3G60250.1,AT2G44680.1,AT5G47080.1 Phypa1|8699,Phypa1|2904,Phypa1|25085,Phypa1|39224  
 AT2G26900.1 Phypa1|28765  
 AT1G78560.1 Phypa1|24509  
     Phypa1|531  
 AT3G06910.1,AT4G00690.1,AT4G15880.1 Phypa1|2957,Phypa1|29014  
 AT4G30920.1,AT2G24200.1,AT4G30910.1 Phypa1|25683  
     Phypa1|20376  
     Phypa1|23485  
 AT4G39540.1,AT2G21940.2 Phypa1|177  
     Phypa1|33729  
     Phypa1|8489  
 AT3G11760.1,AT5G04860.1 Phypa1|26300,Phypa1|28319

AT2G25460.1  
AT2G10560.1  
AT4G04610.1,AT4G21990.1,AT1G62180.1 Phypa1|24161  
Phypa1|30723,Phypa1|31189  
Phypa1|282  
Phypa1|26094  
AT1G05620.1 Phypa1|39633  
AT2G36310.1 Phypa1|2508,Phypa1|28172  
Phypa1|30680  
AT1G27990.1 Phypa1|24189,Phypa1|39683,Phypa1|36434  
AT5G23920.1,AT5G52420.1  
Phypa1|27208,Phypa1|37213,Phypa1|2033  
AT1G56430.1,AT1G09240.1,AT5G56080.1,AT5G04950.1 Phypa1|30090  
AT3G22200.1 Phypa1|38018,Phypa1|2646  
Phypa1|31123,Phypa1|31053,Phypa1|30908  
AT1G33390.1 Phypa1|29924  
AT3G62310.1,AT2G47250.1 Phypa1|38304,Phypa1|39714,Phypa1|36143  
AT2G35340.1,AT1G32490.1 Phypa1|36449  
AT5G13010.1 Phypa1|35427  
AT1G26370.1 Phypa1|27229  
AT4G18465.1 Phypa1|24046  
AT5G14900.1  
AT4G01020.1,AT3G26560.1  
AT4G16680.1  
AT1G27900.1  
AT5G10370.1  
Phypa1|29180  
AT3G55600.1,AT1G54110.1 Phypa1|25459  
AT5G53045.1 Phypa1|29610  
AT3G50110.1,AT3G19420.1 Phypa1|433,Phypa1|28628  
AT5G39400.1  
Phypa1|5406,Phypa1|35817  
AT1G78880.1,AT1G16860.1 Phypa1|36065,Phypa1|1844  
AT2G18450.1,AT5G66760.1 Phypa1|37839,Phypa1|36556  
Phypa1|30876,Phypa1|31005  
AT1G64200.1,AT3G08560.1,AT4G11150.1 Phypa1|9734,Phypa1|39484,Phypa1|37811  
Phypa1|14967  
Phypa1|9733  
AT3G62730.1,AT1G47980.1 Phypa1|26059,Phypa1|6645  
Phypa1|28142  
Phypa1|7738  
Phypa1|3893  
AT2G35040.1 Phypa1|38051,Phypa1|28451  
ATCG01100.1 Phypa1|31051  
ATMG01120.1,ATMG01275.1,ATMG00516.1  
AT3G60910.1 Phypa1|29833  
AT3G17365.1  
Phypa1|29735  
Phypa1|24374  
AT1G76310.1,AT4G35620.1,AT1G20610.1,AT2G17620.1 Phypa1|37823,Phypa1|36915  
AT1G44110.1,AT1G77390.1  
Phypa1|23850,Phypa1|1426,Phypa1|27143,Phypa1|10804,Phypa1|2682,Phypa1|28276,Phypa1|31159,Phypa1|28505,Phypa1|39414,Phypa1|28271  
AT1G16330.1  
AT1G34460.1,AT5G06150.1,AT2G26760.1,AT4G37490.1,AT3G11520.1  
AT1G20590.1  
AT1G80370.1,AT5G11300.1,AT5G25380.1,AT1G15570.1  
AT1G14750.1  
AT5G43080.1,AT1G47230.2,AT1G47210.2,AT1G47220.1  
AT1G75110.1,AT1G75120.1,AT1G19360.1 Phypa1|30226,Phypa1|39437  
Phypa1|17017  
AT5G09995.2 Phypa1|34519,Phypa1|32412  
AT1G08530.1  
Phypa1|320  
AT4G15530.1 Phypa1|36206  
Phypa1|19370,Phypa1|23399  
Phypa1|1547  
Phypa1|1304  
AT3G03773.1 Phypa1|36653,Phypa1|845  
AT4G02450.1  
AT4G12600.1,AT5G20160.2,AT4G22380.1 Phypa1|38688,Phypa1|36696,Phypa1|38472,Phypa1|36250  
AT4G26230.1,AT5G56710.1,AT2G19740.1  
Phypa1|38643,Phypa1|36841,Phypa1|38404,Phypa1|36294,Phypa1|32864  
AT2G02730.1,AT1G27000.1,AT1G04960.1 Phypa1|27992,Phypa1|2004,Phypa1|2008  
AT5G58590.1,AT2G30060.1,AT1G07140.1 Phypa1|703,Phypa1|1542,Phypa1|1544,Phypa1|24007  
AT5G63140.1,AT2G46880.1 Phypa1|2752  
AT5G57140.1  
Phypa1|26326  
AT5G08570.1,AT5G56350.1,AT5G63680.1,AT4G26390.1  
Phypa1|36931,Phypa1|35654,Phypa1|27264,Phypa1|34585,Phypa1|37168  
AT5G52920.1 Phypa1|24076,Phypa1|34668  
AT1G50020.1 Phypa1|255

AT3G22960.1 Phypa1|37967,Phypa1|26777,Phypa1|29730  
AT2G36580.1,AT3G52990.1 Phypa1|39226,Phypa1|31797,Phypa1|24128  
AT3G25960.1,AT3G04050.1,AT3G55650.1,AT3G55810.1  
AT1G32440.1  
Phypa1|30496,Phypa1|3108  
Phypa1|3060,Phypa1|17064,Phypa1|17065  
Phypa1|27739  
AT1G03380.1,AT1G54710.1 Phypa1|31661,Phypa1|29643,Phypa1|31743,Phypa1|20709  
AT5G54730.1  
AT2G25770.1,AT4G32870.1 Phypa1|32386,Phypa1|9200  
AT5G60460.1 Phypa1|1311,Phypa1|368,Phypa1|367  
AT2G45070.1,AT3G60540.1  
AT3G29200.1,AT1G69370.1 Phypa1|36482,Phypa1|28196  
AT5G10870.1  
AT5G59750.1,AT5G64300.1,AT2G22450.1 Phypa1|34878,Phypa1|33936  
AT1G29680.1,AT5G45690.1,AT4G18920.1 Phypa1|24086,Phypa1|37944  
AT1G05510.1,AT2G31985.1 Phypa1|2740  
Phypa1|7087  
AT5G18380.1,AT2G09990.1,AT3G04230.1  
Phypa1|29767,Phypa1|36136,Phypa1|37699,Phypa1|37688,Phypa1|39304  
AT5G52540.1,AT5G24000.1 Phypa1|1867  
Phypa1|34002  
AT4G29000.1,AT2G20110.2 Phypa1|34950,Phypa1|24807  
AT3G16160.1,AT5G25790.1  
AT5G58470.1 Phypa1|14174,Phypa1|35813  
AT2G05510.1,AT2G05440.2,AT2G05520.1 Phypa1|9306,Phypa1|4478  
AT4G38680.1,AT2G21060.1 Phypa1|2070,Phypa1|36426,Phypa1|36685  
AT4G39260.1,AT2G21660.1 Phypa1|7744  
AT5G46730.1,AT1G15830.1,AT4G01985.1,AT5G40490.1,AT1G04800.1,AT5G61030.1,AT1G04660.1,AT5G07530.1  
Phypa1|2584  
AT1G53625.1,AT1G53640.1 Phypa1|35249,Phypa1|35251  
AT3G24250.1,AT4G29020.1  
AT3G44950.1,AT2G30560.1  
AT5G07540.1  
AT2G11005.1,AT1G02710.1,AT4G15460.1  
AT1G76965.1  
AT1G15840.1  
AT1G07135.1  
AT5G33390.1  
AT4G36020.1,AT2G17870.1  
AT2G05540.1  
AT1G74230.1  
AT3G42130.1  
AT3G15400.1,AT1G62240.1  
AT4G30450.1,AT4G30460.1  
Phypa1|37430  
Phypa1|23261  
Phypa1|32059,Phypa1|35459  
Phypa1|6167  
Phypa1|19437  
Phypa1|15289,Phypa1|21248,Phypa1|34825  
Phypa1|7107  
Phypa1|7693,Phypa1|9215  
Phypa1|16966  
Phypa1|34427,Phypa1|9091  
Phypa1|4302  
Phypa1|22239  
Phypa1|16566  
Phypa1|9843  
Phypa1|35250  
AT2G16470.1 Phypa1|374,Phypa1|371,Phypa1|375  
AT3G51120.1,AT2G16480.1 Phypa1|29332  
AT5G08430.1,AT5G63700.1  
AT2G18090.1  
AT3G06350.1 Phypa1|2435  
Phypa1|381  
AT1G18500.1,AT1G74040.1 Phypa1|26194,Phypa1|28773  
AT5G23010.1,AT5G23020.1  
Phypa1|31184,Phypa1|3085  
Phypa1|30691  
AT1G17940.1,AT1G73390.1  
Phypa1|7625,Phypa1|30163,Phypa1|26997,Phypa1|515,Phypa1|26297,Phypa1|36098  
AT5G14020.1  
AT4G29420.1  
Phypa1|15933,Phypa1|34520,Phypa1|26302,Phypa1|32411,Phypa1|31837,Phypa1|23753,Phypa1|15932,  
Phypa1|29479,Phypa1|34816,Phypa1|34521,Phypa1|34250  
Phypa1|15931,Phypa1|19051  
AT3G06810.1 Phypa1|29650,Phypa1|25701  
AT4G33010.1,AT2G26080.1 Phypa1|36111,Phypa1|35163,Phypa1|38274  
Phypa1|31160  
Phypa1|28409  
AT3G13490.1 Phypa1|39561



AT3G11710.1 Phypa1|28209,Phypa1|38958  
AT1G48240.1,AT2G35190.1,AT3G17440.1 Phypa1|38939  
Phypa1|28307,Phypa1|24179,Phypa1|16648  
Phypa1|26494  
AT2G41040.1 Phypa1|29382  
AT1G78140.1  
AT1G48440.1,AT3G17780.1 Phypa1|34619,Phypa1|3455  
AT3G03160.1,AT5G17190.1 Phypa1|38559,Phypa1|31494  
AT5G14120.1,AT3G01930.2 Phypa1|29651,Phypa1|17349,Phypa1|1809  
AT2G16660.1,AT4G34950.1 Phypa1|36318  
AT1G80530.1 Phypa1|25411,Phypa1|36604  
AT1G18940.1,AT2G34350.1,AT2G34355.1,AT1G74780.1 Phypa1|20783  
AT2G39210.1,AT2G28120.1 Phypa1|1813,Phypa1|29146  
AT5G50520.1,AT5G50630.1  
AT2G30300.1,AT4G19450.1,AT1G31470.1,AT3G01630.1,AT5G45275.1  
Phypa1|35551  
Phypa1|32614  
Phypa1|27906  
Phypa1|967  
Phypa1|37060  
Phypa1|27909,Phypa1|35470  
AT1G48790.1 Phypa1|29330,Phypa1|26636  
AT1G10600.1  
AT4G16144.1  
Phypa1|28067  
AT1G35780.1,AT1G78150.1,AT4G39860.1 Phypa1|38121,Phypa1|33688  
AT2G22270.1  
Phypa1|7344  
AT5G60160.1 Phypa1|25395  
AT5G04710.1 Phypa1|24388  
Phypa1|5354,Phypa1|37403,Phypa1|30615  
AT1G24807.1,AT5G57890.1,AT1G25220.1,AT1G25155.1,AT1G24909.1,AT1G25083.1  
Phypa1|687,Phypa1|30364  
AT3G07510.1,AT2G01580.1 Phypa1|28961,Phypa1|29312  
AT3G46890.1,AT5G05950.1  
AT3G46940.1 Phypa1|3899  
Phypa1|1608  
AT5G20920.1 Phypa1|38889,Phypa1|38069,Phypa1|37846  
AT5G01940.1  
AT3G07920.1  
Phypa1|10652  
AT4G30060.1,AT4G25870.1,AT5G57270.1,AT2G19160.1 Phypa1|29530,Phypa1|25911,Phypa1|27558  
AT1G68390.1,AT5G11730.1,AT3G21310.1,AT1G10280.1,AT1G51770.1,AT5G25970.1  
Phypa1|25591,Phypa1|37420,Phypa1|25163,Phypa1|27031  
AT1G11940.1,AT1G62305.1,AT5G14550.1  
Phypa1|38023,Phypa1|25104,Phypa1|25675,Phypa1|29323,Phypa1|536  
AT4G31350.1  
AT3G52060.1,AT5G22070.1  
AT1G68380.1,AT1G10880.1,AT1G73810.1,AT5G16170.1  
AT4G32290.1  
Phypa1|20242  
Phypa1|2268,Phypa1|1895,Phypa1|25194,Phypa1|129  
Phypa1|25984,Phypa1|1034  
Phypa1|29601  
Phypa1|19961  
Phypa1|29603,Phypa1|30396  
AT1G67280.1 Phypa1|26394,Phypa1|26850  
AT1G11840.1  
Phypa1|2972,Phypa1|27596  
AT2G45290.1,AT3G60750.1 Phypa1|2693,Phypa1|12900,Phypa1|23915  
Phypa1|39359  
Phypa1|30738  
AT2G36160.1,AT3G52580.1,AT3G11510.1 Phypa1|37938,Phypa1|39496  
AT4G31780.2 Phypa1|25267,Phypa1|23766  
AT5G20410.1,AT2G11810.1  
AT5G44000.1 Phypa1|30218  
AT5G44990.1,AT4G19880.2,AT5G45020.1 Phypa1|13135  
AT3G61110.1,AT5G47930.1,AT2G45710.1  
Phypa1|2671,Phypa1|31968,Phypa1|39242,Phypa1|36948,Phypa1|2893  
AT4G22920.1,AT4G11910.1 Phypa1|26728,Phypa1|28406  
AT1G44000.1  
Phypa1|1170,Phypa1|24793  
AT4G34570.1,AT2G16370.1 Phypa1|25733  
AT2G21550.1  
Phypa1|22084  
AT5G34930.1,AT1G15710.1 Phypa1|1028,Phypa1|26429,Phypa1|552,Phypa1|28572,Phypa1|540  
AT4G34260.1 Phypa1|39231  
Phypa1|22942,Phypa1|23622  
Phypa1|22911  
AT2G16570.1,AT4G34740.1 Phypa1|35998,Phypa1|36592  
AT4G38880.1  
Phypa1|30426,Phypa1|31376

AT4G19540.1 Phypa1|25217  
AT3G24430.1 Phypa1|39702  
Phypa1|20459  
AT2G26590.1 Phypa1|29747  
AT3G59900.1,AT2G41230.1,AT2G44080.1 Phypa1|34764  
AT3G05280.1,AT5G27490.1 Phypa1|35001,Phypa1|2005,Phypa1|34786  
AT2G39805.1  
AT5G13930.1  
Phypa1|20139,Phypa1|2484,Phypa1|29845,Phypa1|24107,Phypa1|23722,Phypa1|21058,Phypa1|25964,Phypa1|38144,Phypa1|5532,Phypa1|29846,Phypa1|24289,Phypa1|30293,Phypa1|21451,Phypa1|29781,Phypa1|2478,Phypa1|21452,Phypa1|30798  
AT1G02050.1,AT4G34850.1,AT4G00040.1 Phypa1|29862  
Phypa1|1682,Phypa1|26936,Phypa1|37708  
Phypa1|2596,Phypa1|26562,Phypa1|7272  
Phypa1|2572  
Phypa1|31152  
Phypa1|29230,Phypa1|5121  
Phypa1|25969  
Phypa1|25417  
AT1G09780.1,AT3G08590.1 Phypa1|15993,Phypa1|37320  
Phypa1|34753  
Phypa1|3070  
Phypa1|2487  
AT3G14920.1 Phypa1|26805,Phypa1|1793,Phypa1|1386  
AT5G05480.1  
Phypa1|5407  
AT2G47010.1,AT1G17030.1 Phypa1|38169  
AT4G09965.1  
AT3G21070.1 Phypa1|2660,Phypa1|26944  
Phypa1|22232  
Phypa1|2591  
AT1G54520.1 Phypa1|28308,Phypa1|27245  
AT3G51520.1 Phypa1|38463,Phypa1|29187  
Phypa1|35797  
ATCG00680.1 Phypa1|6254  
AT2G34490.1,AT2G34500.1,AT2G28860.1,AT2G28850.1 Phypa1|30702,Phypa1|38346  
AT3G19960.1,AT1G50360.1 Phypa1|37467,Phypa1|29228,Phypa1|28897,Phypa1|25161,Phypa1|27553  
AT5G20490.1,AT1G17580.1,AT1G54560.1,AT1G08730.1 Phypa1|9619,Phypa1|37218  
AT5G54280.1,AT4G27370.1  
AT1G42680.1  
AT2G33240.1,AT1G04600.1,AT1G04160.1,AT5G43900.1,AT4G28710.1,AT3G58160.1  
AT5G20450.1  
AT2G20290.1  
AT5G20470.1  
AT4G33200.1  
AT4G28715.1  
AT2G31900.1  
AT3G52180.1 Phypa1|34083  
Phypa1|31857  
AT1G09020.1 Phypa1|927  
Phypa1|16486  
AT2G39970.1 Phypa1|29442,Phypa1|27266,Phypa1|29673  
Phypa1|19037  
AT1G68790.1,AT1G67230.1,AT1G13220.2,AT5G65770.1 Phypa1|26932,Phypa1|28914  
Phypa1|1952  
Phypa1|21429  
Phypa1|18540  
AT4G03260.1,AT1G78230.1 Phypa1|17318,Phypa1|1113  
AT5G63400.1,AT5G50370.1 Phypa1|38668,Phypa1|23728  
Phypa1|36304  
Phypa1|31273  
Phypa1|10217  
AT5G04900.1 Phypa1|30323  
AT4G13250.1 Phypa1|39302  
Phypa1|1961  
AT3G50690.1 Phypa1|27824,Phypa1|30518,Phypa1|37138  
AT1G64660.1 Phypa1|38500,Phypa1|38167  
Phypa1|6011  
AT3G07800.1,AT5G23070.1 Phypa1|36415,Phypa1|2083  
Phypa1|23660  
AT3G26990.1 Phypa1|34399,Phypa1|32500  
AT5G10060.1,AT5G65180.1  
AT3G19860.2 Phypa1|33904,Phypa1|34008,Phypa1|6626  
AT3G47640.1  
AT4G36060.1  
AT3G13300.1,AT3G13290.1 Phypa1|39047,Phypa1|24322,Phypa1|36978,Phypa1|37573  
Phypa1|20128  
AT1G07360.1,AT2G29580.1 Phypa1|36888  
AT5G07060.1  
AT5G04210.1  
Phypa1|14312  
AT3G25860.1 Phypa1|96,Phypa1|80,Phypa1|84

AT1G34430.1  
AT4G33680.1 Phypa1|25876  
AT2G13810.1  
Phypa1|31165  
AT1G73480.1,AT5G11650.1 Phypa1|27721,Phypa1|38860  
AT1G18360.1  
AT1G72340.1,AT1G53900.1,AT1G53880.1 Phypa1|27329,Phypa1|36848,Phypa1|33624  
AT1G48900.1,AT5G49500.1,AT1G15310.1 Phypa1|32189  
Phypa1|4102  
AT3G10050.1 Phypa1|38045  
Phypa1|30733  
Phypa1|31104  
AT3G63250.1,AT3G22740.1 Phypa1|31730,Phypa1|4200,Phypa1|26877  
AT3G25900.1  
AT5G35980.1 Phypa1|25140,Phypa1|24464,Phypa1|28050,Phypa1|30525,Phypa1|24459,Phypa1|28823  
AT2G44430.1,AT3G57980.1,AT3G60110.1,AT2G42150.1,AT1G61215.1 Phypa1|34119  
AT3G07780.1,AT5G48160.1 Phypa1|7531,Phypa1|25672  
AT3G17630.1,AT5G41610.1,AT4G23700.1,AT1G64170.1 Phypa1|23918,Phypa1|37404  
AT5G01680.1,AT3G44900.1,AT2G13620.1,AT1G06970.1,AT2G30240.1,AT5G22900.1,AT5G58460.1,AT3G44930.1,A  
T5G37060.1  
AT2G31910.1,AT1G05580.1,AT3G53720.1  
AT5G22910.1,AT1G08150.1,AT3G44910.1,AT1G08135.1,AT3G44920.1,AT2G28180.1,AT1G08140.1,AT2G28170.1  
AT3G52080.1  
AT1G16380.1,AT1G79400.1  
Phypa1|20297,Phypa1|29607  
Phypa1|20296  
Phypa1|22925  
Phypa1|17105  
AT1G07280.1,AT3G47080.1,AT2G29670.1 Phypa1|30864,Phypa1|32759  
Phypa1|34362,Phypa1|34701  
AT3G02690.1 Phypa1|29852  
Phypa1|20527,Phypa1|27393  
AT4G38930.2,AT2G21270.1 Phypa1|24030  
AT2G29070.2  
AT5G14170.1,AT3G01890.1 Phypa1|39188,Phypa1|24744,Phypa1|74  
AT4G34100.1 Phypa1|8  
AT4G32670.1  
Phypa1|329,Phypa1|31334  
Phypa1|32142  
Phypa1|26523  
AT2G41520.1,AT5G12430.1 Phypa1|36267  
AT5G16930.1,AT3G03060.1 Phypa1|38946,Phypa1|37114  
AT2G18330.1,AT4G36580.1  
AT3G51830.1 Phypa1|30573,Phypa1|37806,Phypa1|36593  
AT5G66020.1,AT3G51460.1  
AT5G45550.1 Phypa1|39360,Phypa1|36999  
AT4G19050.1  
AT5G20430.1,AT5G20440.1  
AT5G66330.1 Phypa1|37900  
AT2G24230.1,AT5G58150.1 Phypa1|27656,Phypa1|36349  
AT2G31880.1 Phypa1|616,Phypa1|36505  
AT5G48380.1 Phypa1|24426,Phypa1|37459,Phypa1|16582  
AT1G80080.1 Phypa1|2261  
AT5G07280.1 Phypa1|29370,Phypa1|38966,Phypa1|36507,Phypa1|28623,Phypa1|9420  
AT2G19210.1,AT3G46330.1,AT1G51790.1,AT2G37050.3,AT1G51800.1,AT2G28960.1,AT1G51850.1,AT1G67720.1,A  
T4G20450.1,AT2G29000.1,AT2G19230.1,AT2G28990.1,AT1G49100.1,AT3G46350.1,AT5G59680.1,AT2G04300.1,AT  
3G46340.1,AT2G14510.1,AT1G51910.1,AT5G48740.1,AT2G14440.1,AT3G46420.1,AT3G46400.1,AT1G51805.1,AT1  
G07560.1,AT3G46370.1,AT5G16900.1,AT1G51810.1,AT5G59650.1,AT1G51890.1,AT3G21340.1,AT4G29990.1,AT1G  
07550.1,AT1G51880.1,AT1G51860.1,AT1G51820.1,AT5G59670.1  
Phypa1|36639,Phypa1|24943,Phypa1|24981,Phypa1|24966,Phypa1|13048  
AT1G17230.1,AT5G63930.1,AT2G33170.1 Phypa1|37479,Phypa1|37622  
AT5G62230.1,AT2G26330.1,AT5G07180.1  
Phypa1|2555,Phypa1|26614,Phypa1|27856,Phypa1|30244,Phypa1|27921,Phypa1|897  
AT5G14210.1,AT3G03770.1 Phypa1|32464  
AT1G34210.1,AT1G71830.1 Phypa1|25789,Phypa1|27806,Phypa1|36968  
AT5G01890.1,AT5G06940.1,AT2G24130.1,AT5G44700.1,AT5G10020.1,AT4G13880.1,AT1G34110.1,AT4G04220.1,A  
T5G25910.1,AT1G62950.1,AT2G32680.1,AT2G27060.1,AT5G40170.1,AT4G36180.1,AT3G23110.1,AT3G11080.1,AT2  
G15080.1,AT3G23010.1,AT1G74360.1,AT2G02220.1,AT3G05660.1,AT1G73070.1,AT1G12460.1,AT4G20940.1,AT2G  
34930.1,AT3G28890.1,AT5G65700.1  
Phypa1|39639,Phypa1|1072,Phypa1|945,Phypa1|37724,Phypa1|37756,Phypa1|30073,Phypa1|35944,Phy  
pa1|31560,Phypa1|39410  
AT3G15410.1 Phypa1|35331  
AT2G35620.1,AT1G31420.1 Phypa1|28868,Phypa1|39321,Phypa1|26372,Phypa1|27313  
AT1G06840.1,AT5G01950.1,AT5G37450.1 Phypa1|28495  
AT4G03010.1,AT1G03440.1 Phypa1|133,Phypa1|28349  
AT2G42290.1,AT2G01820.1,AT1G69990.1,AT2G20850.1,AT1G53440.1,AT5G67280.1,AT3G19700.1,AT4G13920.1,A  
T5G06860.1,AT3G20190.1,AT2G33050.1,AT5G16590.1,AT1G53430.1,AT1G71400.1,AT1G33590.1,AT2G36570.1,AT  
5G61570.1,AT1G51870.1,AT5G53890.1,AT3G56050.1,AT1G55610.1,AT1G53420.1,AT2G19190.1,AT1G07650.1,AT5  
G45800.1,AT3G05360.1,AT4G08850.1,AT4G23740.1,AT1G58190.1,AT5G49780.1,AT5G49750.1,AT1G60630.1,AT1G  
56130.1,AT3G14350.1,AT5G58540.1,AT1G48480.1,AT3G53590.1,AT3G12610.1,AT3G57830.1,AT5G51350.1,AT5G0  
7150.1,AT1G66830.1,AT1G47890.1,AT1G17250.1,AT5G13290.1,AT1G56120.1,AT1G13910.1,AT4G22730.1,AT2G23  
950.1,AT5G24100.1,AT5G20690.1,AT5G63710.1,AT5G20480.1,AT1G78980.1,AT3G24982.1,AT1G29750.2,AT3G4711

0.1,AT5G16000.1,AT1G69270.1,AT1G56140.1,AT3G50230.1,AT1G14390.1,AT3G56370.1,AT3G13065.1,AT2G26380.1,AT4G29450.1,AT5G59660.1,AT1G09970.2,AT1G68780.1,AT2G23300.1,AT2G33020.1,AT5G65710.1,AT5G43020.1,AT1G29730.1,AT3G25010.1,AT4G28560.1,AT4G39270.1,AT2G41820.1,AT1G72180.1,AT2G42800.1,AT4G20140.1,AT1G72180.1,AT2G42800.1,AT4G34220.1,AT2G45340.1,AT1G74200.1,AT1G27190.1,AT2G13800.1,AT5G48940.1,AT1G34420.1,AT2G15300.1,AT1G25320.1,AT1G29740.1,AT3G11010.1,AT5G12940.1,AT4G13820.1,AT3G25020.1,AT3G28040.1,AT4G37250.1,AT3G02880.1,AT1G78530.1,AT3G47090.1,AT5G41180.1,AT1G45616.1,AT4G26540.1,AT5G25930.1,AT2G33080.1,AT1G13230.1,AT5G46080.1,AT5G49770.1,AT3G24240.1,AT5G53320.1,AT3G24900.1,AT4G13810.1,AT5G39390.1,AT3G20820.1,AT4G28650.1,AT5G07620.1,AT3G23750.1,AT4G29180.1,AT5G10290.1,AT2G01950.1,AT5G06870.1,AT3G13380.1,AT1G33600.1,AT5G62710.1,AT1G11130.1,AT1G69910.1,AT5G51560.1,AT3G14840.2,AT3G59510.1,AT3G49670.1,AT1G17750.1,AT5G56040.2,AT1G63430.1,AT4G20270.1,AT1G35710.1,AT1G75640.1,AT5G27060.1,AT4G18760.1,AT4G03390.1,AT5G45770.1,AT2G32660.1,AT1G71390.1,AT2G28970.1,AT5G61480.1,AT3G51740.1,AT1G07390.1,AT5G45840.1,AT3G17640.1,AT5G05160.1,AT5G06820.1,AT1G53730.1,AT1G74190.1,AT3G05650.1,AT4G39400.1,AT2G25440.1,AT3G24660.1,AT3G25670.1,AT3G02130.1,AT5G49660.1,AT5G58300.1,AT1G60800.1,AT1G28440.1,AT2G33060.1,AT1G24650.1,AT1G75820.1,AT5G61240.1,AT5G41680.1,AT2G01210.1,AT3G17840.1,AT1G65380.1,AT1G74180.1,AT1G66150.1,AT1G56145.1,AT1G68400.1,AT3G05370.1,AT5G49290.1,AT2G16250.1,AT2G25470.1,AT1G79620.1,AT5G46330.1,AT1G33670.1,AT5G49760.1,AT3G42880.1,AT1G54480.1,AT1G51830.1,AT1G74170.1,AT4G28490.1,AT1G33610.1,AT2G26730.1,AT1G08590.1,AT5G23400.1,AT1G72300.1,AT2G25790.1,AT1G73080.1,AT3G5240.1,AT5G65240.1,AT2G19780.1,AT3G23120.1,AT1G67510.1,AT4G22130.1 Phypa1|37747  
AT5G21090.1,AT3G43740.2 Phypa1|38075,Phypa1|24422  
AT4G18640.1 Phypa1|36194,Phypa1|39341,Phypa1|28098,Phypa1|38116,Phypa1|29243,Phypa1|35927  
AT5G65830.1,AT3G49750.1 Phypa1|28984,Phypa1|1111  
AT2G15320.1  
AT3G28450.1  
AT1G17240.1  
AT5G59616.1,AT1G05700.1  
AT3G47580.1,AT3G47570.1  
AT3G12145.1  
AT5G63410.1,AT2G02780.1  
AT2G13790.1,AT4G33430.1  
AT1G64210.1,AT3G08680.1  
AT5G35390.1,AT1G50610.1,AT2G07040.1  
AT1G34290.1  
Phypa1|38368  
Phypa1|620  
Phypa1|1353  
Phypa1|38716  
Phypa1|1936  
Phypa1|407  
Phypa1|4690  
Phypa1|39191  
Phypa1|1479  
Phypa1|38639,Phypa1|460  
Phypa1|38364,Phypa1|3075,Phypa1|26535  
Phypa1|39732  
Phypa1|24917  
Phypa1|15064,Phypa1|28854,Phypa1|36689,Phypa1|24607,Phypa1|25002  
Phypa1|29185,Phypa1|37163  
Phypa1|6816,Phypa1|36238,Phypa1|13898  
Phypa1|30183,Phypa1|25907  
Phypa1|7361  
Phypa1|1323  
Phypa1|30895,Phypa1|29172,Phypa1|29100,Phypa1|26755  
Phypa1|27546  
Phypa1|18,Phypa1|30348  
Phypa1|27974  
Phypa1|30861,Phypa1|28375  
Phypa1|117,Phypa1|511,Phypa1|30400  
Phypa1|25042,Phypa1|26033,Phypa1|902,Phypa1|26573,Phypa1|35934  
Phypa1|1018  
Phypa1|32621,Phypa1|34807,Phypa1|15312,Phypa1|1812  
Phypa1|33053,Phypa1|1417,Phypa1|32229,Phypa1|26627,Phypa1|30360,Phypa1|916,Phypa1|35870,Phypa1|13642,Phypa1|28470,Phypa1|418,Phypa1|14746,Phypa1|2861,Phypa1|12793,Phypa1|45,Phypa1|18615,Phypa1|30234,Phypa1|18508,Phypa1|30186,Phypa1|1796,Phypa1|28729,Phypa1|449,Phypa1|13,Phypa1|38840,Phypa1|37991,Phypa1|5311,Phypa1|1387,Phypa1|25007,Phypa1|1368,Phypa1|34385,Phypa1|1797,Phypa1|36640,Phypa1|34982,Phypa1|20636  
Phypa1|34960  
Phypa1|28431,Phypa1|6984,Phypa1|26602,Phypa1|36088,Phypa1|25966,Phypa1|19562,Phypa1|1755,Phypa1|33364,Phypa1|29164,Phypa1|28690,Phypa1|37654,Phypa1|25035,Phypa1|29875,Phypa1|29914,Phypa1|1033  
Phypa1|17708,Phypa1|29701  
Phypa1|28688,Phypa1|27980  
Phypa1|28256,Phypa1|1617  
Phypa1|9595,Phypa1|36447  
Phypa1|1654  
Phypa1|20835  
Phypa1|8776  
Phypa1|5552  
Phypa1|13896  
AT4G05180.1,AT4G21280.2 Phypa1|32660  
Phypa1|35918,Phypa1|37491  
Phypa1|2538  
AT5G55600.1 Phypa1|29289,Phypa1|25697  
AT1G68580.2

AT1G18260.1,AT1G73570.1 Phypa1|426,Phypa1|25248  
     Phypa1|38321  
 AT1G30890.1,AT3G59500.1 Phypa1|29017,Phypa1|28099  
 AT1G72660.1,AT1G17470.1 Phypa1|33557  
 AT4G39520.1 Phypa1|32194  
 AT4G32890.1,AT3G60530.1,AT5G25830.1 Phypa1|1512  
 AT4G26150.1,AT5G56860.1 Phypa1|33890,Phypa1|3728,Phypa1|28545,Phypa1|27853  
 AT3G51080.1,AT4G36240.1,AT5G66320.1  
 AT3G24050.1,AT1G08010.1,AT4G34680.1  
 AT1G08000.1,AT2G28340.1,AT3G54810.1,AT2G45050.1  
 AT3G45170.1  
 AT5G26930.1,AT5G49300.1,AT3G06740.1  
 AT3G20750.1,AT4G36620.1,AT3G50870.1,AT2G18380.1  
     Phypa1|1712,Phypa1|1710,Phypa1|1711  
 AT5G54310.1,AT3G17660.1 Phypa1|25888,Phypa1|34124  
     Phypa1|14223  
 AT4G30380.1,AT2G18660.1 Phypa1|27122  
 AT4G22240.1,AT4G04020.1 Phypa1|25394,Phypa1|27100  
 AT2G35490.1  
     Phypa1|26122  
 AT2G45700.1 Phypa1|27846  
 AT3G26680.1 Phypa1|39663  
 ATCG00830.1,ATCG01310.1 Phypa1|31275  
 AT2G44065.1  
 AT5G49960.1 Phypa1|23762,Phypa1|25200  
     Phypa1|31874  
 AT1G30470.1,AT1G07990.1,AT2G28360.1,AT3G45190.1 Phypa1|37518,Phypa1|1758,Phypa1|1354,Phypa1|27682  
 AT5G15410.1,AT5G54250.1 Phypa1|451,Phypa1|27440  
 AT1G01340.1,AT5G57940.1,AT1G19780.1,AT1G15990.1,AT2G23980.1,AT4G01010.1,AT4G30560.1,AT5G53130.1  
     Phypa1|37501,Phypa1|26,Phypa1|9728,Phypa1|25872  
 AT3G17690.1,AT3G17700.1 Phypa1|1766  
 AT3G48010.1,AT5G14870.1,AT4G30360.1,AT2G24610.1,AT2G28260.1  
 AT2G46450.1,AT2G46440.1,AT2G46430.1  
     Phypa1|15851  
     Phypa1|28290  
 AT5G46860.1,AT5G16830.1,AT4G17730.1 Phypa1|23811  
 AT1G32270.1  
     Phypa1|36812,Phypa1|25929  
 AT5G17720.1,AT1G64670.1,AT5G41900.1,AT5G17780.1,AT4G24140.1 Phypa1|1842,Phypa1|970  
     Phypa1|597,Phypa1|24505  
 AT5G53080.1 Phypa1|26589,Phypa1|20295,Phypa1|28392,Phypa1|37112  
     Phypa1|27779  
 AT4G14305.1 Phypa1|28268,Phypa1|24250,Phypa1|28266  
 AT4G04470.1  
 AT1G36160.1,AT1G36180.1 Phypa1|24946,Phypa1|37383  
     Phypa1|6054  
     Phypa1|6055  
 AT3G55630.3,AT5G05980.1,AT3G10160.1 Phypa1|29016,Phypa1|34563  
 AT3G46740.1 Phypa1|36208,Phypa1|24396,Phypa1|35386  
 AT1G35860.1  
 AT4G09080.1  
     Phypa1|38550  
 AT3G46640.1,AT5G59570.1 Phypa1|2059,Phypa1|1076,Phypa1|1480,Phypa1|1481  
 AT2G20570.1,AT5G44190.1 Phypa1|3000,Phypa1|36306  
 AT4G16110.1,AT3G16857.2 Phypa1|24814,Phypa1|25149,Phypa1|30283  
 AT5G05090.1,AT3G10760.1,AT2G40970.1  
 AT4G18020.1  
 AT4G31920.1,AT2G25180.1  
 AT1G67710.1  
 AT5G49240.1  
 AT5G58080.1  
 AT1G68210.1  
 AT2G01760.1  
 AT4G00760.1  
     Phypa1|26063,Phypa1|1003  
 AT3G53830.1,AT3G55580.1 Phypa1|24836,Phypa1|39100,Phypa1|2622,Phypa1|16094  
 AT5G03905.1 Phypa1|30412,Phypa1|27690  
 AT1G10500.1 Phypa1|25736,Phypa1|25296,Phypa1|28743  
 AT1G53210.1 Phypa1|24688,Phypa1|24371,Phypa1|25247,Phypa1|26327  
 AT2G34020.1,AT2G34030.1,AT1G29020.1  
 AT3G55850.2 Phypa1|28346  
     Phypa1|30579,Phypa1|30485,Phypa1|31154,Phypa1|30954  
     Phypa1|20536  
     Phypa1|22987  
 AT1G29840.1,AT3G47590.1,AT5G11910.1,AT2G19550.1,AT3G47560.2 Phypa1|2450,Phypa1|6546  
 AT4G18440.1,AT1G36280.1 Phypa1|38792  
     Phypa1|2404  
     Phypa1|23517  
 AT3G60880.2,AT2G45440.1 Phypa1|25348,Phypa1|26962  
     Phypa1|2357,Phypa1|30474  
     Phypa1|2408  
 AT1G54860.1,AT5G19250.1,AT5G19240.1,AT5G19230.1,AT3G06035.1 Phypa1|261

AT3G53220.1 Phypa1|25381  
AT4G22670.1 Phypa1|4343  
AT5G42980.1,AT1G45145.1,AT1G19730.1,AT3G51030.1  
Phypa1|28102,Phypa1|36889,Phypa1|38333,Phypa1|27431,Phypa1|24902  
AT1G31020.1,AT2G35010.1 Phypa1|35891  
AT3G17880.1  
AT2G40790.1,AT3G56420.1,AT3G08710.1  
AT1G69880.1,AT1G59730.1,AT5G39950.1  
AT1G11530.1  
AT2G42380.2,AT3G58120.1 Phypa1|35198,Phypa1|31925,Phypa1|32103,Phypa1|33140  
Phypa1|3413,Phypa1|32567,Phypa1|11367  
AT3G01410.1,AT1G24090.1,AT5G51080.1 Phypa1|16884  
Phypa1|10929  
Phypa1|720  
AT2G33470.1 Phypa1|24181  
AT3G21260.2  
AT1G48350.1 Phypa1|2750,Phypa1|29264,Phypa1|25930  
AT1G14205.1  
Phypa1|31265  
Phypa1|28916  
AT5G67030.1 Phypa1|16897,Phypa1|36935  
Phypa1|32164,Phypa1|35394  
AT3G09800.1,AT1G60970.1,AT4G08520.1 Phypa1|38194,Phypa1|36060,Phypa1|36605  
Phypa1|26867  
AT1G54385.1,AT3G03970.1 Phypa1|15742,Phypa1|17505  
Phypa1|14584,Phypa1|14812  
Phypa1|6881  
AT4G26910.1,AT5G55070.1 Phypa1|24382,Phypa1|39171  
AT5G25040.1,AT5G25050.1,AT1G79710.1 Phypa1|36520  
AT5G10820.1  
AT1G78280.1 Phypa1|28354,Phypa1|36844  
AT5G63420.1 Phypa1|409  
Phypa1|22752,Phypa1|29994,Phypa1|31362  
AT4G31050.1 Phypa1|646  
AT1G04640.1 Phypa1|1141  
AT1G47580.1  
AT1G18950.1 Phypa1|25319,Phypa1|25904,Phypa1|25331  
AT5G25580.1  
AT4G31210.1 Phypa1|16102,Phypa1|28124  
AT4G21450.1,AT4G05060.1,AT5G54110.1 Phypa1|38311,Phypa1|25558,Phypa1|39480,Phypa1|34299  
AT4G39970.1 Phypa1|36958  
AT3G48420.1 Phypa1|29388  
AT1G13320.1,AT3G25800.1 Phypa1|37637,Phypa1|34581,Phypa1|39012  
AT1G25490.1  
Phypa1|10002  
AT5G03660.1,AT2G36355.1,AT3G09980.1,AT3G52900.1,AT2G27740.1,AT3G52920.1,AT2G36410.1  
Phypa1|26541  
AT3G46540.1 Phypa1|39778,Phypa1|619  
AT1G08670.1  
AT3G23350.1  
Phypa1|1520,Phypa1|1516,Phypa1|34986,Phypa1|625  
AT4G27690.1,AT5G53530.1 Phypa1|17908,Phypa1|39199,Phypa1|39524  
AT5G05230.1,AT2G40640.1 Phypa1|25974,Phypa1|33851  
AT3G19895.1  
AT2G18950.1 Phypa1|25645,Phypa1|26945  
Phypa1|24479  
AT1G02080.1 Phypa1|27162,Phypa1|36422  
Phypa1|10864  
Phypa1|32920  
AT1G35470.2,AT4G09340.1 Phypa1|1870,Phypa1|2265  
AT4G09250.1,AT4G09200.1,AT4G09310.1  
Phypa1|34695  
AT5G23040.1 Phypa1|39387,Phypa1|26984,Phypa1|38818  
AT3G51140.1  
Phypa1|26694,Phypa1|25990  
AT1G16880.1,AT5G04740.1 Phypa1|25403,Phypa1|27455  
AT4G15570.1 Phypa1|34428  
AT4G05540.1,AT1G16800.1,AT4G30100.1,AT1G65780.1,AT2G19120.1,AT1G65810.1  
Phypa1|18590,Phypa1|35405  
AT4G24380.1,AT5G65400.1 Phypa1|25682,Phypa1|29457  
Phypa1|2023  
AT5G19320.1,AT3G63130.1 Phypa1|36435,Phypa1|38817  
AT3G06000.1  
AT3G55270.1 Phypa1|27889,Phypa1|24645,Phypa1|26040,Phypa1|1597  
AT1G78780.2 Phypa1|27894  
AT3G48730.1,AT5G63570.1 Phypa1|36568,Phypa1|25113  
Phypa1|21644  
Phypa1|31099,Phypa1|30681  
Phypa1|31367,Phypa1|31035  
AT1G63770.2 Phypa1|39352,Phypa1|38869,Phypa1|28306  
AT1G08130.1,AT1G49250.1 Phypa1|39381  
AT1G66730.1

AT1G52220.1 Phypa1|23813,Phypa1|33661,Phypa1|24130  
AT2G46820.1  
AT3G46030.1,AT1G07790.1,AT3G53650.1,AT5G02570.1,AT5G22880.1,AT3G09480.1,AT2G37470.1,AT2G28720.1,AT5G59910.1,AT3G45980.1  
Phypa1|38909,Phypa1|2967,Phypa1|32451,Phypa1|38498,Phypa1|38910,Phypa1|38635,Phypa1|2811,Phypa1|11672,Phypa1|2922  
AT1G08170.1  
AT4G37880.1,AT2G22690.1 Phypa1|38250,Phypa1|38677,Phypa1|7743,Phypa1|23799  
AT5G09630.1  
Phypa1|21508  
AT3G61580.1,AT2G46210.1 Phypa1|34900  
Phypa1|38930,Phypa1|33177  
AT2G37940.1,AT2G29525.1,AT3G54020.1 Phypa1|2913,Phypa1|29015,Phypa1|27881  
AT1G03280.1,AT4G20810.1 Phypa1|23815  
AT4G20340.1  
Phypa1|7569  
AT3G51450.1,AT3G51440.1,AT3G51420.1,AT3G51430.1 Phypa1|1948,Phypa1|38848,Phypa1|27585,Phypa1|2281  
Phypa1|25354  
AT5G40850.1 Phypa1|582  
Phypa1|30498,Phypa1|23556,Phypa1|30494  
Phypa1|30722  
AT5G06290.1,AT3G11630.1 Phypa1|38421  
Phypa1|30473  
Phypa1|35044  
AT3G05940.1,AT5G26740.1 Phypa1|1000,Phypa1|1874  
Phypa1|26095  
AT2G20830.2 Phypa1|2983  
Phypa1|29322  
AT5G52570.1,AT4G25700.1 Phypa1|1482  
Phypa1|38308,Phypa1|3029  
AT5G23670.1,AT3G48780.1 Phypa1|30345  
AT3G48790.1  
Phypa1|31483,Phypa1|30592  
Phypa1|4213  
AT3G55760.1 Phypa1|1746  
AT1G42430.1 Phypa1|37270,Phypa1|27994  
AT3G18530.1,AT5G14790.1,AT3G01450.1 Phypa1|587,Phypa1|26043  
AT4G15830.1  
AT5G62300.1,AT3G45030.1,AT3G47370.1 Phypa1|30566,Phypa1|29611,Phypa1|29490  
AT2G47420.1 Phypa1|27689  
AT5G66360.2  
Phypa1|20488  
AT3G10920.1,AT3G56350.1 Phypa1|28653  
Phypa1|30874  
AT1G15930.1,AT2G32060.1 Phypa1|28844,Phypa1|2194,Phypa1|24103  
AT1G23100.1,AT1G14980.1 Phypa1|31667,Phypa1|29754,Phypa1|37369,Phypa1|24765  
AT5G20720.1 Phypa1|39783,Phypa1|24919,Phypa1|29827,Phypa1|36050  
AT1G06680.1,AT2G30790.1 Phypa1|36678,Phypa1|1534,Phypa1|36805,Phypa1|23930  
Phypa1|4557,Phypa1|26568  
AT3G06660.1,AT1G56460.1,AT2G47350.1 Phypa1|33593  
AT5G35160.1 Phypa1|38179,Phypa1|35963,Phypa1|26550  
AT1G10950.1 Phypa1|39726  
AT1G14670.1,AT2G01970.1 Phypa1|37539,Phypa1|39059  
AT2G24170.1,AT5G10840.1,AT1G55130.1,AT5G25100.1,AT3G13772.1  
Phypa1|27089,Phypa1|28167,Phypa1|10091,Phypa1|37265  
AT4G12650.1  
AT5G37310.1  
AT1G08350.1  
Phypa1|30696  
Phypa1|30320,Phypa1|38309  
Phypa1|25382  
AT3G01390.1,AT4G23710.1 Phypa1|36213,Phypa1|38824  
AT4G25950.1  
AT5G32440.1 Phypa1|37439,Phypa1|39762  
AT1G80040.1  
AT5G02510.1  
Phypa1|36034  
AT1G28510.1 Phypa1|37172  
AT3G58150.1  
Phypa1|2141  
Phypa1|10594  
AT1G78680.1,AT1G78670.1,AT1G78660.1 Phypa1|145,Phypa1|28295  
Phypa1|1958,Phypa1|33573  
AT2G21340.1,AT4G39030.1 Phypa1|26175,Phypa1|26474,Phypa1|37301  
Phypa1|34078  
AT4G26300.1,AT1G66530.1 Phypa1|25953  
Phypa1|21332  
Phypa1|23502,Phypa1|31149  
AT3G25780.1,AT1G13280.1,AT3G25770.1,AT3G25760.1 Phypa1|31500,Phypa1|39665  
Phypa1|29555,Phypa1|26036,Phypa1|37240  
AT5G48370.1,AT2G30720.1 Phypa1|38072,Phypa1|39395,Phypa1|498  
Phypa1|11955

AT2G32220.1,AT4G15000.1,AT3G22230.1 Phypa1|37016,Phypa1|33466,Phypa1|37671,Phypa1|37974  
AT1G53280.1,AT3G14990.1 Phypa1|2670,Phypa1|26104  
AT4G34020.1  
Phypa1|31282  
AT3G02720.1 Phypa1|39140  
AT2G38860.2,AT3G54600.1  
Phypa1|22079  
AT5G13280.1,AT3G02020.1,AT5G14060.1 Phypa1|28491,Phypa1|29746  
Phypa1|31215  
Phypa1|23116  
AT1G50380.1 Phypa1|24069  
AT1G69020.1 Phypa1|24280  
AT5G66960.1  
Phypa1|19928  
AT5G15520.1,AT3G02080.1,AT5G61170.1  
Phypa1|36995,Phypa1|32962,Phypa1|38460,Phypa1|24175,Phypa1|38337  
AT1G43170.1,AT1G61580.1 Phypa1|36822,Phypa1|37368,Phypa1|2472,Phypa1|39598  
AT4G15093.1 Phypa1|38101  
Phypa1|22706  
AT1G74470.1 Phypa1|33675,Phypa1|38100,Phypa1|38323  
AT3G02920.1,AT2G24490.1 Phypa1|38022  
AT5G65690.1,AT4G37870.1 Phypa1|24346,Phypa1|38662,Phypa1|28063,Phypa1|28438  
Phypa1|1728  
Phypa1|22726  
AT3G16700.1,AT4G15940.1 Phypa1|28026  
Phypa1|36083,Phypa1|30955,Phypa1|31089,Phypa1|30932  
Phypa1|20872  
AT2G30390.1 Phypa1|1403,Phypa1|25903,Phypa1|30289  
AT5G26030.1  
AT2G04520.1,AT5G35680.1 Phypa1|29934,Phypa1|3914,Phypa1|31594,Phypa1|39577  
AT2G34160.1,AT1G29250.1 Phypa1|27637,Phypa1|27624,Phypa1|38957  
AT3G04620.1  
AT2G20450.1,AT4G27090.1 Phypa1|36878,Phypa1|24109,Phypa1|37969,Phypa1|38919  
AT3G56310.1,AT5G08370.1 Phypa1|5440  
AT5G08380.1  
AT2G15900.1 Phypa1|24698,Phypa1|26721  
Phypa1|9664,Phypa1|8221  
AT3G59780.1 Phypa1|33183  
AT4G39870.1 Phypa1|640,Phypa1|1954,Phypa1|639  
AT2G05590.2  
AT3G20050.1 Phypa1|38517,Phypa1|39312,Phypa1|38897  
AT3G11830.1 Phypa1|36266,Phypa1|37947  
AT1G24510.1 Phypa1|34955  
AT3G18190.1 Phypa1|39197,Phypa1|17358  
AT5G20890.1 Phypa1|39007,Phypa1|37913  
AT3G03960.1 Phypa1|39705  
AT3G02530.1,AT5G16070.1 Phypa1|37268,Phypa1|28002  
AT5G26360.1 Phypa1|8903,Phypa1|16260,Phypa1|39124  
AT1G67760.1  
AT4G08640.1  
Phypa1|32800  
AT4G01575.1,AT3G61980.1 Phypa1|33429  
Phypa1|34860,Phypa1|33300  
AT3G10960.1 Phypa1|27648  
AT5G50300.1  
Phypa1|20616  
AT5G04490.1 Phypa1|637  
AT5G58560.1  
AT5G60410.2 Phypa1|31940,Phypa1|31745,Phypa1|33609,Phypa1|33139  
AT2G20270.1,AT4G28730.1 Phypa1|30055  
AT3G02000.1,AT5G14070.1 Phypa1|26601,Phypa1|27925  
AT5G63030.1,AT5G40370.1 Phypa1|1672  
AT4G15660.1,AT2G30540.1,AT4G15690.1,AT5G18600.1,AT4G15670.1,AT1G03020.1,AT1G06830.1,AT4G15700.1,A  
T4G15680.1,AT3G62930.1  
AT5G11930.1,AT4G33040.1  
AT3G62950.1,AT2G47880.1,AT3G62960.1,AT2G47870.1  
AT1G28480.1  
AT1G03850.1  
Phypa1|13629,Phypa1|2211  
AT4G23430.2,AT5G02540.1,AT4G23420.1,AT4G11410.1,AT2G37540.1  
Phypa1|37564,Phypa1|30170,Phypa1|26253  
AT5G15940.1,AT5G04070.1 Phypa1|29866  
AT4G09750.1  
AT1G64590.1,AT5G50130.1,AT4G24050.1  
Phypa1|32329  
Phypa1|28492,Phypa1|30833  
Phypa1|11108,Phypa1|3700  
Phypa1|31349,Phypa1|30052  
Phypa1|20513  
AT4G13730.1,AT1G04830.1 Phypa1|2517,Phypa1|36781  
AT1G69770.1,AT4G19020.1 Phypa1|27792  
AT1G80740.1



AT2G38130.1 Phypa1|25498,Phypa1|244  
AT1G72810.1,AT4G29840.2 Phypa1|24795,Phypa1|27736,Phypa1|29521,Phypa1|26224  
Phypa1|82  
Phypa1|31309  
AT2G41460.1 Phypa1|27934  
Phypa1|23101  
AT3G18620.1 Phypa1|19095,Phypa1|584  
AT3G04970.1 Phypa1|26966  
AT3G09320.1 Phypa1|26714,Phypa1|1476  
AT5G41060.1,AT3G26935.1,AT3G48760.1 Phypa1|29007,Phypa1|2603,Phypa1|25473  
AT5G04270.1  
AT5G05070.1,AT3G56930.1,AT2G40990.1,AT3G56920.1  
AT4G24630.1,AT5G50020.1  
Phypa1|3271  
AT5G08450.1 Phypa1|32992,Phypa1|35709,Phypa1|34597  
AT5G23890.1 Phypa1|35732,Phypa1|29142,Phypa1|37972  
AT5G52410.2  
AT3G25680.1  
Phypa1|476  
AT5G44750.1 Phypa1|35152,Phypa1|34903,Phypa1|32212  
AT2G38040.1  
AT4G27440.1,AT5G54190.1,AT1G03630.1 Phypa1|39145,Phypa1|27636  
AT1G21610.1,AT1G77310.1 Phypa1|35334,Phypa1|33990  
AT5G07300.1,AT5G61900.1,AT1G08860.1 Phypa1|39567  
AT5G04170.1,AT3G10300.3 Phypa1|27194,Phypa1|758,Phypa1|1185  
AT2G27480.1  
AT2G25970.1 Phypa1|11032,Phypa1|33420,Phypa1|22544  
AT4G31580.1,AT2G24590.1 Phypa1|30123,Phypa1|28992  
AT1G23860.1  
AT4G10040.1,AT1G22840.1 Phypa1|36984,Phypa1|31786,Phypa1|37071  
Phypa1|2744  
AT2G21390.1,AT1G62020.1 Phypa1|36035,Phypa1|39090,Phypa1|38847  
AT1G74210.1,AT5G08030.1 Phypa1|6601  
AT3G07890.1 Phypa1|36166,Phypa1|36127,Phypa1|23948  
AT5G38640.1,AT1G48970.1 Phypa1|23969  
AT2G44070.1  
AT3G28490.1,AT3G28480.1 Phypa1|611  
AT2G17720.1,AT1G20270.1,AT4G35810.1,AT5G66060.1 Phypa1|176,Phypa1|24914  
AT2G43080.1 Phypa1|38197  
AT4G33910.1 Phypa1|34355,Phypa1|5450  
AT3G06300.1,AT5G18900.1  
AT4G25600.1  
AT4G35820.1  
AT2G23096.1  
Phypa1|30802  
AT5G39900.1 Phypa1|36464  
AT5G08650.1 Phypa1|31617  
Phypa1|31175  
AT4G25340.1,AT5G05420.1 Phypa1|28353  
AT3G12340.1  
AT3G11450.1,AT5G06110.1 Phypa1|37190,Phypa1|39622,Phypa1|2873  
AT1G74250.1  
AT1G15340.1 Phypa1|14299,Phypa1|14298,Phypa1|32874,Phypa1|34134,Phypa1|32873,Phypa1|21988  
AT3G15790.1  
Phypa1|35655  
AT5G16870.1,AT3G03010.1 Phypa1|264  
Phypa1|39283  
Phypa1|2035  
AT1G31750.1,AT5G17650.1,AT5G45350.1,AT4G19200.1 Phypa1|31787  
AT2G31650.1,AT1G05830.1 Phypa1|37855,Phypa1|27326,Phypa1|27052  
AT2G24440.1,AT4G31360.1 Phypa1|35186  
Phypa1|29513  
AT1G15550.1,AT1G80330.1,AT1G80340.1,AT4G21690.1  
Phypa1|1913,Phypa1|7629,Phypa1|34590,Phypa1|37035,Phypa1|1436,Phypa1|4927,Phypa1|28733,Phypa1|140,Phypa1|1451,Phypa1|583,Phypa1|28448,Phypa1|30330,Phypa1|28708  
AT1G35190.1,AT3G46480.1,AT3G46490.1 Phypa1|36521,Phypa1|34424  
AT4G16330.1 Phypa1|24059  
AT3G19010.1,AT3G19000.1 Phypa1|37888,Phypa1|37887,Phypa1|37886  
AT1G17020.1,AT1G17010.1,AT4G25300.1,AT1G78550.1,AT2G38240.1,AT3G21420.1,AT4G25310.1,AT3G11180.1,AT5G05600.1 Phypa1|29413,Phypa1|25997,Phypa1|24945,Phypa1|1928  
AT3G49630.1,AT3G49620.1,AT3G50210.1 Phypa1|39272  
AT1G50960.1,AT4G21200.1  
AT1G02400.1,AT1G30040.1,AT2G34555.1,AT1G78440.1,AT1G47990.1  
AT4G03050.2,AT4G03060.1,AT4G03070.1,AT1G52820.1  
AT5G51310.1,AT4G23340.1  
AT4G22870.1  
AT1G60980.1,AT4G25420.1,AT1G44090.1,AT5G51810.1,AT5G07200.1  
AT5G58660.1  
AT2G06960.1  
AT1G14120.1  
AT4G16765.1,AT4G16770.1  
AT3G46500.1

AT3G13610.1,AT1G55290.1,AT5G12270.1  
 AT5G63590.1,AT5G43935.1,AT5G08640.1,AT5G63600.2,AT4G22880.1,AT5G63595.1,AT5G63580.1  
 AT4G10490.1,AT2G36690.1,AT5G24530.1,AT4G10500.1  
 AT2G44800.1,AT5G07480.1,AT3G60290.1  
 AT1G62380.1,AT1G12010.1  
 AT3G55970.1  
 AT3G51240.1  
 AT1G03400.1  
 AT1G52810.1  
 AT3G47190.1  
 AT1G77330.1  
 AT1G04350.1,AT5G59540.1,AT1G06640.1,AT2G30830.1,AT1G04380.1,AT1G06650.2,AT3G61400.1,AT5G43450.1,AT1G06620.1,AT1G03410.1,AT5G43440.1,AT2G25450.1,AT5G59530.1,AT2G30840.1  
 AT3G12900.1  
 AT5G54000.1,AT1G49390.1,AT5G20400.1,AT5G20550.1  
 AT1G14130.1  
     Phypa1|36726,Phypa1|26221  
     Phypa1|153  
     Phypa1|2915  
     Phypa1|29197,Phypa1|27668  
     Phypa1|8124,Phypa1|26918  
     Phypa1|1463  
     Phypa1|30891  
     Phypa1|32779  
     Phypa1|26672,Phypa1|28027  
     Phypa1|27963  
     Phypa1|21215  
     Phypa1|37961  
 AT2G13680.1           Phypa1|28911  
 AT3G07160.1           Phypa1|37318,Phypa1|38526,Phypa1|25203,Phypa1|36723,Phypa1|36911,Phypa1|24971  
 AT4G03550.1,AT4G04970.1           Phypa1|36710,Phypa1|36069,Phypa1|38063  
 AT3G14780.1,AT3G14570.1  
 AT2G31960.1,AT5G13000.1,AT1G05570.1  
 AT3G59100.1,AT1G06490.1  
 AT2G36850.1  
 AT5G36870.1  
     Phypa1|26690,Phypa1|28454  
 AT3G51840.1           Phypa1|28173,Phypa1|36964  
 AT2G22120.1           Phypa1|24029  
 AT1G50440.1  
 AT1G11020.1  
 AT2G03530.1,AT2G03590.1,AT1G26440.3,AT2G03600.1   Phypa1|7607  
 AT2G03520.1  
     Phypa1|28296,Phypa1|16639  
 AT2G30100.1           Phypa1|27726  
     Phypa1|27290  
 AT3G10985.1           Phypa1|30347,Phypa1|29391  
 AT5G01740.1  
     Phypa1|25952  
 AT5G02450.1,AT3G53740.3,AT2G37600.1           Phypa1|33493,Phypa1|36331  
 AT5G24330.1,AT5G09790.1           Phypa1|37629,Phypa1|39691  
 AT3G01040.1,AT5G15470.1           Phypa1|36018,Phypa1|36120,Phypa1|5267  
 AT2G20810.1           Phypa1|36774,Phypa1|36559  
 AT3G61130.1           Phypa1|29430,Phypa1|13224  
 AT3G58790.1  
 AT5G54690.1  
 AT1G18580.1  
 AT5G47780.1  
 AT3G02350.1,AT3G25140.1  
 AT2G46480.1,AT4G38270.1  
 AT2G38650.1  
     Phypa1|21810  
     Phypa1|36180  
     Phypa1|21809  
 AT3G50620.1,AT4G34420.1,AT2G15730.1           Phypa1|25355,Phypa1|24537,Phypa1|36607,Phypa1|37922  
 AT5G12400.1,AT5G35210.1,AT5G22760.1           Phypa1|1242  
 AT3G15610.1,AT1G15470.1,AT1G52730.1           Phypa1|34767,Phypa1|38363  
     Phypa1|22535  
 AT1G57720.1,AT1G09640.1           Phypa1|38453,Phypa1|37453,Phypa1|37224  
 AT3G07720.1,AT5G48180.1,AT3G16400.1,AT2G33070.1,AT3G16410.1           Phypa1|34830  
 AT1G54040.2,AT3G16390.1  
 AT2G45010.1           Phypa1|38375,Phypa1|23824  
 AT5G51400.1  
     Phypa1|740  
 AT5G12150.1,AT5G19390.1           Phypa1|29612,Phypa1|26983  
 AT4G24580.1  
 AT3G22860.1,AT3G56150.1           Phypa1|4012,Phypa1|38661,Phypa1|905,Phypa1|39117  
 AT4G04920.1           Phypa1|37631  
 AT3G26080.1,AT3G26070.1           Phypa1|701  
     Phypa1|35270  
 AT5G47390.1           Phypa1|657,Phypa1|9869,Phypa1|9588,Phypa1|34496,Phypa1|27256  
 AT3G16350.1

Phypa1|9590  
AT5G41770.1,AT3G13210.1,AT5G45990.1 Phypa1|23859,Phypa1|31606  
AT3G51110.1  
AT5G39550.1,AT1G66040.1,AT1G57820.1,AT1G57800.1,AT1G66050.1 Phypa1|26186,Phypa1|30367  
AT4G08590.1  
AT3G54230.1 Phypa1|2610,Phypa1|32398  
AT1G25250.1,AT1G68130.1,AT2G01940.2 Phypa1|39368  
AT2G02070.1,AT2G02080.1 Phypa1|34279,Phypa1|33159,Phypa1|33937  
AT5G44160.1,AT5G03150.1,AT1G55110.1,AT1G03840.1,AT3G13810.1  
AT3G50700.1,AT5G66730.1  
AT5G60470.1,AT1G14580.1  
AT5G16270.1 Phypa1|26958  
AT5G40840.2  
Phypa1|26951  
AT1G30230.1,AT2G18110.1 Phypa1|19665,Phypa1|39139  
AT5G19510.1,AT5G12110.1  
Phypa1|2561  
Phypa1|9858  
AT3G56680.1,AT2G40960.1,AT5G05100.1,AT3G10770.1 Phypa1|13050,Phypa1|33566  
AT1G55350.1 Phypa1|37457  
AT1G08630.1,AT3G04520.1 Phypa1|37025  
Phypa1|21734  
Phypa1|21377  
AT1G73750.1 Phypa1|27732  
AT1G15060.1 Phypa1|437  
AT1G60810.1,AT1G10670.1,AT1G09430.1 Phypa1|35976,Phypa1|36677  
AT2G39140.1 Phypa1|33358  
AT3G43340.1  
Phypa1|31444  
AT5G19620.1 Phypa1|24273  
AT3G44160.1,AT3G48620.1  
Phypa1|18577  
AT5G21930.1 Phypa1|28880  
AT4G37270.1 Phypa1|26415,Phypa1|29751  
AT4G33520.3 Phypa1|39029,Phypa1|25228  
AT5G44790.1 Phypa1|37508,Phypa1|11422  
AT1G63440.1  
Phypa1|32036  
Phypa1|5497  
Phypa1|23408  
Phypa1|31373  
AT2G38250.1,AT5G01380.1 Phypa1|37862,Phypa1|27472,Phypa1|2771,Phypa1|29834,Phypa1|29832  
AT3G45620.1 Phypa1|483,Phypa1|36508,Phypa1|24742  
AT4G35140.1,AT4G38480.1  
AT5G42950.1 Phypa1|9891,Phypa1|35074,Phypa1|34107  
AT2G28800.1 Phypa1|482,Phypa1|1410  
AT1G24490.1  
AT4G04955.1 Phypa1|37050,Phypa1|24727,Phypa1|32521  
Phypa1|30777,Phypa1|30481,Phypa1|29997  
AT5G16700.1,AT3G26140.1,AT3G26130.1,AT5G17500.1,AT1G13130.1 Phypa1|1840,Phypa1|481  
AT1G65295.1 Phypa1|38068,Phypa1|24366,Phypa1|857,Phypa1|1285,Phypa1|24418  
AT5G01015.1  
AT4G37220.1,AT3G50830.1,AT2G15970.1 Phypa1|25988,Phypa1|23761,Phypa1|36487,Phypa1|28181  
AT2G23680.1  
AT3G04380.1 Phypa1|87  
AT1G04050.1,AT5G43990.2  
Phypa1|25416  
AT3G12500.1,AT1G02360.1,AT4G01700.1 Phypa1|28881,Phypa1|2541  
AT1G05850.1,AT3G16920.1 Phypa1|29870,Phypa1|28071,Phypa1|2997  
AT1G56680.1,AT2G43570.1,AT2G43580.1,AT2G43620.1,AT2G43590.1,AT3G47540.1,AT2G43610.1,AT3G54420.1  
Phypa1|39260  
AT2G43600.1  
Phypa1|39239,Phypa1|28084  
Phypa1|29896,Phypa1|25972  
Phypa1|29891  
Phypa1|8751,Phypa1|1104  
Phypa1|31217,Phypa1|1287  
Phypa1|25107  
AT3G09560.1,AT5G42870.1 Phypa1|32601,Phypa1|3457  
AT1G36730.1,AT1G77840.1 Phypa1|112,Phypa1|36956  
AT4G31090.1,AT2G24330.1 Phypa1|28618,Phypa1|2269  
AT4G31080.1  
AT3G60100.1,AT2G44350.2 Phypa1|36378,Phypa1|28506  
Phypa1|8898  
AT5G63920.1 Phypa1|30836  
AT2G32000.1 Phypa1|39757  
Phypa1|21359  
AT2G33980.1,AT1G28960.1 Phypa1|624  
AT5G45940.1  
AT2G05840.1,AT5G35590.1 Phypa1|2493,Phypa1|37669,Phypa1|37976,Phypa1|38920  
Phypa1|4140  
AT3G24180.1 Phypa1|37233,Phypa1|25985

AT4G10060.1,AT1G33700.1,AT5G49900.1  
AT2G48050.1 Phypa1|25432,Phypa1|25538  
AT2G48040.1 Phypa1|25565,Phypa1|25441  
AT4G21810.1,AT4G04860.1 Phypa1|23851,Phypa1|37691  
AT1G04420.1 Phypa1|30715  
Phypa1|38844  
AT5G27540.1 Phypa1|29468,Phypa1|37559,Phypa1|2962,Phypa1|27356  
AT3G05310.1  
AT3G63150.1  
AT4G16420.1,AT3G07740.1 Phypa1|25179,Phypa1|35759  
Phypa1|6690  
AT5G14320.1 Phypa1|29501,Phypa1|29494  
AT1G77750.1  
Phypa1|1198  
Phypa1|31355  
AT1G17880.1,AT1G73230.1 Phypa1|2138,Phypa1|38024,Phypa1|38400,Phypa1|35840  
AT5G02870.1,AT3G09630.1 Phypa1|4469,Phypa1|31995,Phypa1|24126,Phypa1|36420  
AT5G07880.1,AT5G61210.1,AT1G13890.1 Phypa1|202,Phypa1|37447  
Phypa1|13748  
AT3G56170.1,AT2G40410.2 Phypa1|32270  
Phypa1|7447  
AT5G11800.1,AT5G51710.1,AT2G19600.1 Phypa1|27047,Phypa1|471  
AT1G62870.1,AT1G12380.1 Phypa1|2559,Phypa1|27670,Phypa1|37692,Phypa1|37048  
Phypa1|4187  
AT3G28007.1,AT1G66770.1,AT5G40260.1,AT4G10850.1  
Phypa1|29329,Phypa1|25944,Phypa1|29882,Phypa1|32945,Phypa1|27953  
AT1G21460.1,AT5G53190.1,AT3G14770.1  
AT5G23660.1,AT4G15920.1,AT2G39060.1,AT3G48740.1,AT5G50790.1,AT3G16690.1,AT5G50800.1,AT4G25010.1,A  
T5G13170.1  
AT5G62850.1  
Phypa1|29381  
AT2G39050.1 Phypa1|24633,Phypa1|24600,Phypa1|26906  
Phypa1|8140  
AT3G08890.1,AT2G03350.1,AT5G37070.1,AT5G01610.1 Phypa1|39122,Phypa1|36488  
AT5G19490.1,AT3G12480.1 Phypa1|27684,Phypa1|25790,Phypa1|2378  
AT1G75850.1,AT2G17790.1 Phypa1|35367,Phypa1|38126  
AT3G51310.1  
AT2G37270.1,AT3G11940.1 Phypa1|23906,Phypa1|38994,Phypa1|38083,Phypa1|37023,Phypa1|4472  
AT5G39740.1,AT3G25520.1 Phypa1|38032,Phypa1|39653,Phypa1|36980,Phypa1|38511  
AT1G04280.1,AT2G30630.2,AT1G06750.1 Phypa1|24719  
AT5G03760.1,AT5G22740.1 Phypa1|36700,Phypa1|38492,Phypa1|36363  
AT4G31590.1,AT2G24630.1  
Phypa1|27243,Phypa1|36155,Phypa1|37409,Phypa1|34269,Phypa1|4895,Phypa1|30318,Phypa1|39385  
AT4G16590.1,AT2G35650.1,AT1G23480.1,AT4G13410.1,AT5G16190.1,AT1G24070.1  
AT3G56000.1  
AT4G07960.1  
AT3G28180.1  
AT3G07330.1  
Phypa1|20252  
AT4G18593.1 Phypa1|12959  
Phypa1|28822,Phypa1|34711  
AT5G35560.1 Phypa1|26686,Phypa1|28032  
AT2G20320.1  
AT3G43230.1 Phypa1|39526  
AT1G29800.1  
AT3G20870.1 Phypa1|37557  
AT5G06220.1,AT3G11560.3 Phypa1|25828,Phypa1|37443  
Phypa1|30074  
Phypa1|33  
AT1G52600.1,AT3G15710.1 Phypa1|38584,Phypa1|34099  
AT1G04880.1 Phypa1|2288,Phypa1|30249  
AT3G13350.1,AT1G55650.1,AT1G76110.1  
AT5G45060.1,AT3G44480.1,AT1G72850.1,AT1G27180.1,AT5G51630.1,AT4G16890.1,AT4G09420.1,AT5G45210.1,A  
T5G18350.1,AT5G40100.1,AT1G57670.1,AT4G16950.1,AT5G45000.1,AT4G19510.1,AT4G23515.1,AT5G47280.1,AT  
5G45250.1,AT5G38344.1,AT1G72870.1,AT5G46260.1,AT4G09360.1,AT5G49140.1,AT5G11250.1,AT5G46270.1,AT3  
G04210.1,AT5G58120.1,AT1G66090.1,AT5G22690.1,AT1G72910.1,AT4G16960.1,AT5G38350.1,AT4G19470.1,AT1G  
72920.1,AT1G57630.1,AT1G72860.1,AT4G16930.1,AT1G63730.1,AT2G32140.1,AT5G17970.1,AT5G44510.1,AT1G6  
4070.1,AT4G04110.1,AT5G44870.1,AT2G03300.1,AT5G45200.1,AT1G69550.1,AT5G18360.1,AT2G03030.1,AT2G170  
60.1,AT4G11340.1,AT5G41550.1,AT2G16870.1,AT5G48780.1,AT4G19500.1,AT5G40090.1,AT1G17600.1,AT5G40060  
.1,AT5G18370.1,AT1G57850.1,AT5G45080.1,AT4G09430.1,AT1G61105.1,AT1G63870.1,AT4G16920.1,AT5G17880.1,  
AT1G72890.1,AT5G45070.1,AT1G27170.1,AT3G44630.3,AT1G56540.1,AT1G72940.1,AT4G08450.1,AT3G44670.1,A  
T3G51560.1,AT2G20145.1,AT4G12010.1,AT3G51570.1,AT4G16860.1,AT1G17615.1,AT5G41540.1,AT1G72930.1,AT  
4G19515.1,AT5G45220.1,AT1G72950.1,AT5G44920.1,AT4G16940.1,AT1G63740.1,AT4G36150.1,AT5G48770.1,AT1  
G17610.1,AT5G45260.1,AT5G38340.1,AT1G72840.1,AT5G46520.1,AT1G65390.1,AT5G46490.2,AT5G36930.1,AT4G  
36140.1,AT1G56510.1,AT1G72900.1,AT1G60320.1,AT5G45050.1,AT4G16990.2,AT2G14080.1,AT5G44900.1,AT1G6  
5850.1,AT1G31540.1,AT1G47370.1,AT2G17050.1,AT5G44910.1,AT1G57830.1,AT5G46510.1  
Phypa1|249,Phypa1|25014,Phypa1|4812,Phypa1|31813,Phypa1|281,Phypa1|2126,Phypa1|1377,Phypa1|  
33733,Phypa1|28486,Phypa1|27517,Phypa1|29251  
AT1G51280.1,AT5G38850.1,AT5G41750.1,AT4G11170.1,AT4G19910.1,AT1G63880.1,AT4G19925.1,AT5G46470.1,AT  
4G19920.1,AT5G46450.1,AT3G44400.1,AT4G23510.1,AT1G63750.1,AT3G04220.1,AT5G45230.1,AT4G19530.1,AT5  
G17680.1,AT5G40910.1,AT1G09665.1,AT4G16900.1  
AT5G41740.1,AT1G57650.1,AT1G56520.1,AT3G25510.1

AT5G45240.1,AT4G19520.1  
AT1G52900.1  
Phypa1|24898  
AT1G80030.1 Phypa1|475,Phypa1|24018  
AT5G18140.1 Phypa1|33026  
AT5G59610.1 Phypa1|10699  
AT5G48030.1 Phypa1|1849,Phypa1|24781  
AT4G39960.1,AT2G22360.1 Phypa1|30386,Phypa1|36959  
AT2G17880.1,AT4G36040.1  
AT3G17830.1  
AT4G09350.1  
AT1G28210.2  
Phypa1|5216  
Phypa1|33910  
Phypa1|7538  
Phypa1|1714  
Phypa1|2720  
AT3G06540.1 Phypa1|28383  
AT4G34120.1,AT4G36910.1 Phypa1|26766,Phypa1|38830,Phypa1|28279  
AT4G01150.1 Phypa1|29042,Phypa1|2178,Phypa1|24773  
AT4G38100.1  
AT1G16080.1 Phypa1|627  
AT5G65720.1 Phypa1|14958,Phypa1|26090  
Phypa1|23616,Phypa1|22812  
AT1G69720.1,AT2G26670.1 Phypa1|36496,Phypa1|39190  
AT1G58300.1  
AT2G26550.1  
Phypa1|688,Phypa1|24720  
AT5G62600.1 Phypa1|33137  
Phypa1|34384  
AT1G22850.1 Phypa1|1052,Phypa1|146  
Phypa1|21177  
Phypa1|30247  
AT4G38040.1 Phypa1|2647  
AT5G19670.1,AT5G25820.1,AT4G32790.1,AT4G16745.1 Phypa1|29897  
AT3G07620.1,AT5G03795.1 Phypa1|27318,Phypa1|27316  
AT5G37000.1,AT5G11610.1  
AT5G11130.1,AT5G20260.1,AT3G42180.1,AT5G33290.1  
AT5G25310.1  
Phypa1|15164,Phypa1|4169,Phypa1|1919  
Phypa1|29872,Phypa1|19139  
Phypa1|19980,Phypa1|27697  
AT5G17710.2 Phypa1|30311,Phypa1|29633  
AT1G36390.1  
AT5G13440.1,AT5G13430.1 Phypa1|4222,Phypa1|26098,Phypa1|24824  
Phypa1|27967  
AT1G11890.1 Phypa1|38768,Phypa1|38607  
AT5G52270.1  
AT4G39140.1,AT1G19680.1,AT2G21500.1,AT1G75400.1 Phypa1|34466  
Phypa1|32042  
AT1G01500.1 Phypa1|28249,Phypa1|26618  
AT1G75180.1,AT1G19400.1  
AT2G17580.1,AT1G28090.1,AT5G23690.1,AT3G48830.1 Phypa1|32512  
Phypa1|20864  
AT2G31955.1 Phypa1|2908,Phypa1|5800  
Phypa1|31306  
AT5G27700.1,AT3G53890.1 Phypa1|24058,Phypa1|2521,Phypa1|38050,Phypa1|39564  
Phypa1|38757  
AT4G29590.1 Phypa1|29956  
AT3G01660.1 Phypa1|24281  
AT2G33550.1 Phypa1|33461  
Phypa1|33084,Phypa1|21704  
AT2G21790.1 Phypa1|39284,Phypa1|36687  
Phypa1|22684  
Phypa1|29566,Phypa1|29655  
AT1G49970.1 Phypa1|30184,Phypa1|27060  
AT1G09130.1 Phypa1|26911,Phypa1|25862  
AT1G01440.1,AT3G61670.1,AT4G01090.1,AT2G46380.1 Phypa1|34682  
AT5G03850.1,AT5G64140.1,AT3G10090.1  
Phypa1|38459,Phypa1|25279,Phypa1|29690,Phypa1|26030,Phypa1|37930  
AT5G66150.1,AT3G26720.1,AT5G13980.1 Phypa1|27990,Phypa1|36820  
AT1G07110.1 Phypa1|2947,Phypa1|29350,Phypa1|37648  
Phypa1|3051  
AT1G76030.1,AT1G20260.2,AT4G38510.1 Phypa1|35741,Phypa1|38916,Phypa1|23874  
Phypa1|15362  
AT1G04150.1,AT4G11610.1,AT4G20080.1,AT3G61300.1,AT5G06850.1,AT5G48060.1,AT1G51570.1,AT1G22610.1,AT5G12970.1,AT4G00700.1,AT3G57880.1  
Phypa1|38057,Phypa1|9815,Phypa1|27839,Phypa1|24094,Phypa1|37849  
AT5G17980.1,AT1G74720.1,AT3G03680.1  
AT5G44760.1,AT5G03435.1  
Phypa1|37848  
AT5G10860.1 Phypa1|2425,Phypa1|38351

Phypa1|26454  
 AT5G42760.1 Phypa1|28211,Phypa1|32484,Phypa1|12792  
 AT5G02310.1 Phypa1|26713,Phypa1|30254,Phypa1|27386  
 Phypa1|4614  
 AT5G23540.1 Phypa1|36480,Phypa1|37324  
 Phypa1|2909  
 AT2G38670.1 Phypa1|29674,Phypa1|25822  
 AT1G59510.1,AT1G10150.1,AT3G49790.1 Phypa1|25508,Phypa1|27003  
 AT5G51100.1,AT4G25100.1 Phypa1|23732,Phypa1|1132  
 AT5G23310.1  
 Phypa1|33660  
 AT5G20990.1 Phypa1|27940  
 Phypa1|22301  
 Phypa1|22436  
 Phypa1|20579  
 AT2G24390.1,AT4G31310.1,AT5G39720.1,AT5G39730.1 Phypa1|25123  
 AT3G28950.1,AT3G28930.1,AT3G28940.1  
 AT2G42680.1,AT3G58680.1 Phypa1|36969,Phypa1|36352  
 Phypa1|24196  
 AT2G40730.1 Phypa1|36492  
 AT3G22400.1,AT1G55020.1  
 Phypa1|28615,Phypa1|27395,Phypa1|36754,Phypa1|38097,Phypa1|37710,Phypa1|38096,Phypa1|39704,  
 Phypa1|35728,Phypa1|25294  
 AT1G72520.1,AT1G17420.1,AT1G67560.1  
 AT3G45140.1  
 Phypa1|30962,Phypa1|1359,Phypa1|30666  
 Phypa1|30961  
 Phypa1|16584  
 AT3G19340.1 Phypa1|26544,Phypa1|28169  
 AT5G13940.1  
 AT1G64810.2,AT5G57930.2 Phypa1|2585  
 AT3G21740.1  
 AT5G61930.1  
 AT1G26220.1 Phypa1|7051  
 AT1G32070.2 Phypa1|30120  
 AT1G26760.1 Phypa1|1428  
 Phypa1|13037  
 AT2G03120.1 Phypa1|26195,Phypa1|36481  
 Phypa1|2296,Phypa1|34999  
 AT5G26710.1 Phypa1|38568,Phypa1|26449  
 Phypa1|3839,Phypa1|20269,Phypa1|14566  
 Phypa1|2883,Phypa1|3840  
 AT4G38220.2 Phypa1|38539  
 AT1G44180.1,AT1G44820.1  
 Phypa1|34530,Phypa1|2503  
 AT5G56670.1,AT4G29390.1,AT2G19750.1 Phypa1|25335,Phypa1|38902,Phypa1|37858,Phypa1|36197  
 AT1G07780.1,AT5G05590.1,AT1G29410.2 Phypa1|648  
 Phypa1|31233  
 AT2G19730.1,AT4G29410.1 Phypa1|2183,Phypa1|31447,Phypa1|2184,Phypa1|39767,Phypa1|2363  
 AT5G42190.1,AT1G75950.1 Phypa1|23678,Phypa1|31708  
 AT2G03160.1,AT2G03170.1,AT2G25700.1,AT2G03190.1,AT1G20140.1,AT3G25650.1,AT1G10230.1,AT3G21850.1,A  
 T4G34470.1,AT3G60010.1,AT4G34210.1,AT2G20160.1  
 AT3G53060.1,AT3G60020.1,AT3G21860.1  
 AT3G21830.1,AT3G21840.1  
 Phypa1|26845  
 Phypa1|832  
 Phypa1|831  
 Phypa1|2635  
 Phypa1|23797  
 Phypa1|6332  
 AT4G24610.1,AT5G65440.1 Phypa1|24689,Phypa1|38755,Phypa1|5003  
 AT5G48310.1  
 AT1G33270.1 Phypa1|25634  
 AT3G56490.1 Phypa1|833  
 AT1G31160.1  
 Phypa1|2818  
 AT4G10620.1 Phypa1|942  
 AT3G57180.1  
 AT4G37030.1 Phypa1|25030,Phypa1|1807,Phypa1|38582  
 AT3G27390.1,AT4G12680.1,AT5G40640.1  
 AT3G50880.1,AT1G19480.1,AT1G75230.2 Phypa1|39135,Phypa1|2007  
 Phypa1|22285  
 AT4G25030.1,AT5G45410.1 Phypa1|158,Phypa1|2280,Phypa1|2282  
 AT1G30000.1 Phypa1|38647  
 AT3G21160.1,AT1G51590.1 Phypa1|5000,Phypa1|38071  
 AT5G60750.1 Phypa1|29562  
 AT5G64610.1,AT5G09740.1 Phypa1|24977  
 Phypa1|24327  
 Phypa1|14658  
 AT1G05360.1,AT4G14950.1 Phypa1|24551,Phypa1|25349  
 AT1G74050.1,AT1G18540.1,AT1G74060.1 Phypa1|27929,Phypa1|23826,Phypa1|36281,Phypa1|27948  
 AT2G32730.1,AT1G04810.1 Phypa1|23792,Phypa1|39470,Phypa1|33801

Phypa1|27504  
AT1G52920.1,AT2G20770.1 Phypa1|37636,Phypa1|25712  
AT5G65280.1  
AT1G15140.1 Phypa1|1087  
Phypa1|33021  
Phypa1|31717  
AT2G31250.1,AT1G09940.1,AT1G58290.1 Phypa1|24980,Phypa1|35621,Phypa1|29473  
Phypa1|30870  
AT3G59540.1,AT2G43460.1 Phypa1|38573,Phypa1|24020,Phypa1|38709  
Phypa1|39530  
AT5G03415.1 Phypa1|25863,Phypa1|26905  
AT5G02470.1  
Phypa1|37665  
AT2G05230.1,AT3G06340.1,AT4G19570.1,AT5G37380.1,AT5G53150.1,AT2G35540.1,AT2G05250.1,AT2G25560.1  
Phypa1|682  
AT4G19590.1,AT5G37760.1,AT5G37750.1,AT5G37440.1,AT4G19580.1  
AT5G27240.1  
AT2G01710.1,AT3G04980.1  
AT1G09260.1  
Phypa1|26313,Phypa1|33046,Phypa1|3349  
Phypa1|34880,Phypa1|18557  
Phypa1|35134  
AT5G16460.1 Phypa1|789,Phypa1|142  
AT1G29760.1,AT2G34380.1  
AT5G67020.1,AT3G50340.1 Phypa1|38064,Phypa1|37140,Phypa1|36146  
AT2G22790.1  
AT4G06599.1 Phypa1|38331  
AT2G31810.2,AT5G16290.1 Phypa1|28485  
Phypa1|6266  
Phypa1|31186  
AT2G29700.1,AT5G05710.1 Phypa1|36905,Phypa1|37543,Phypa1|33819  
AT5G53760.1,AT1G26700.1 Phypa1|941,Phypa1|453,Phypa1|39,Phypa1|1394,Phypa1|26548,Phypa1|457  
AT2G44110.2,AT2G33670.1,AT4G02600.1,AT1G61560.1,AT4G24250.1  
Phypa1|37005,Phypa1|1818,Phypa1|29,Phypa1|38086,Phypa1|36211  
AT1G11000.1  
AT3G45290.1,AT2G17430.1  
AT5G65970.1,AT2G17480.1,AT1G11310.1,AT1G42560.1,AT2G39200.1  
AT5G08050.1 Phypa1|26084  
AT1G74730.1 Phypa1|29582,Phypa1|29335,Phypa1|2135  
AT1G20200.1,AT1G75990.1 Phypa1|31640,Phypa1|9540,Phypa1|36249  
AT5G28050.2 Phypa1|2434  
AT3G05300.1  
Phypa1|30447  
Phypa1|4411  
Phypa1|23044  
AT5G55120.1,AT4G26850.1 Phypa1|33814,Phypa1|994,Phypa1|93  
AT1G67070.1,AT3G02570.1 Phypa1|34558,Phypa1|36105  
AT1G50400.1,AT3G20000.1 Phypa1|38036  
Phypa1|24469,Phypa1|24918  
AT5G61820.1 Phypa1|28725,Phypa1|29441,Phypa1|35763  
AT1G36320.1 Phypa1|24585,Phypa1|26543  
AT4G37920.1  
Phypa1|522  
AT2G13360.1 Phypa1|38653,Phypa1|38039,Phypa1|36150  
Phypa1|26275  
Phypa1|31201  
AT3G42850.1,AT4G16130.1 Phypa1|36108,Phypa1|24098  
AT3G55410.1,AT5G65750.1 Phypa1|36023  
Phypa1|4353,Phypa1|31852  
Phypa1|37821  
AT4G34350.1 Phypa1|37616,Phypa1|38440  
Phypa1|23084  
AT5G14130.1,AT3G28200.1,AT4G17690.1,AT4G11290.1,AT1G05260.1,AT3G49960.1,AT2G18980.1,AT4G37530.1,AT1G24110.1,AT4G37520.1,AT5G40150.1,AT2G34060.1,AT4G30170.1,AT5G67400.1,AT5G47000.1  
Phypa1|25252,Phypa1|26083  
AT5G17820.1,AT1G34510.1,AT3G03670.1,AT4G26010.1 Phypa1|2601,Phypa1|27705  
AT3G50990.1,AT2G18150.1,AT5G06720.1,AT4G36430.1,AT1G44970.1,AT5G66390.1,AT2G18140.1  
Phypa1|9166,Phypa1|27693  
AT4G21960.1,AT2G37130.1 Phypa1|12049,Phypa1|38111  
AT3G17070.1 Phypa1|36669,Phypa1|24766  
AT5G22410.1  
AT2G41480.1,AT5G64120.1,AT4G25980.1,AT5G39580.1  
AT1G05240.1,AT1G05250.1  
AT4G33870.1  
AT2G43480.1,AT5G24070.1  
AT5G19880.1,AT5G19890.1,AT3G49120.1,AT4G08770.1,AT4G08780.1,AT2G38390.1,AT3G32980.1,AT3G49110.1,AT2G38380.1  
AT5G58390.1,AT1G14540.1,AT5G05340.1,AT5G58400.1,AT1G14550.1  
AT1G49570.1  
AT4G33420.1,AT5G51890.1  
AT1G71695.1,AT4G16270.1  
AT2G35380.1

AT2G22420.1  
 AT1G68850.1  
 AT1G30870.1  
     Phypa1|26444,Phypa1|2656  
     Phypa1|29125,Phypa1|29900,Phypa1|29131  
     Phypa1|26682,Phypa1|39700  
     Phypa1|31257  
     Phypa1|35633  
     Phypa1|29253  
     Phypa1|5611  
     Phypa1|37908,Phypa1|37907  
     Phypa1|25479  
     Phypa1|38013  
     Phypa1|25131,Phypa1|24829,Phypa1|36451  
 AT2G29200.1,AT2G29140.1,AT2G29190.1    Phypa1|38895,Phypa1|38485,Phypa1|27376  
 AT5G56510.1    Phypa1|436,Phypa1|25048  
 AT4G25880.1,AT3G20250.1,AT3G10360.1  
 AT1G78160.1,AT4G08840.1,AT1G35730.1  
 AT1G22240.1,AT1G35750.1  
 AT5G43110.1,AT5G43090.1,AT4G08560.1  
     Phypa1|25794  
     Phypa1|4907  
     Phypa1|27368  
 AT5G43940.1    Phypa1|36702  
 AT5G63620.1    Phypa1|27366  
 AT1G32780.1,AT1G64710.1,AT1G77120.1  
 AT5G42250.1,AT5G24760.1,AT1G22440.1  
     Phypa1|23776  
     Phypa1|21805,Phypa1|25590  
     Phypa1|28197  
     Phypa1|34365  
     Phypa1|30015  
     Phypa1|26985  
     Phypa1|31007  
     Phypa1|31157  
 AT4G11960.1,AT4G22890.1    Phypa1|28244  
     Phypa1|16379  
 AT4G14365.1    Phypa1|28125,Phypa1|28863  
 AT3G23280.1  
 AT5G23150.1,AT5G08230.1    Phypa1|31752  
 AT3G63070.1,AT2G48160.1  
 AT3G11400.1,AT5G06000.1    Phypa1|37827,Phypa1|38794  
     Phypa1|29947  
 AT1G17370.1,AT1G54080.2,AT3G14100.1    Phypa1|485,Phypa1|27138  
 AT5G03730.1    Phypa1|1356  
 AT4G24480.1  
 AT5G51050.1,AT5G07320.1,AT5G61810.1    Phypa1|29104,Phypa1|38980  
 AT3G61050.1    Phypa1|36667,Phypa1|36452,Phypa1|963  
 AT3G60950.1,AT3G61030.1  
 AT2G40510.1,AT3G56340.1,AT2G40590.1    Phypa1|308,Phypa1|38056,Phypa1|28584  
 AT4G16600.1,AT2G35710.1    Phypa1|25536,Phypa1|39367,Phypa1|29957,Phypa1|24616  
 AT2G29210.1    Phypa1|36587,Phypa1|37489  
 AT3G47910.1,AT3G47890.1    Phypa1|27956,Phypa1|398  
     Phypa1|27954  
 AT3G49180.1    Phypa1|25209,Phypa1|5493  
 AT1G18080.1,AT3G18130.1,AT1G48630.1    Phypa1|39468,Phypa1|39502,Phypa1|31895  
 AT5G58230.1    Phypa1|31803  
 AT2G16780.1,AT4G35050.1  
 AT5G18290.1,AT3G04090.1    Phypa1|38134,Phypa1|24481  
 AT4G24570.1,AT2G22500.1    Phypa1|39404,Phypa1|24089,Phypa1|2566,Phypa1|30710,Phypa1|34886  
 AT5G58970.1,AT3G54110.1,AT1G14140.1,AT4G03115.1,AT5G09470.1  
     Phypa1|38619,Phypa1|15016,Phypa1|20220,Phypa1|36106  
 AT5G19760.1    Phypa1|29752,Phypa1|37864,Phypa1|35593  
 AT5G01340.1    Phypa1|39109  
     Phypa1|39596  
     Phypa1|30130  
 AT3G02870.1    Phypa1|39542,Phypa1|39499,Phypa1|38385  
     Phypa1|35818  
 AT1G60060.1    Phypa1|1925,Phypa1|27672,Phypa1|1442,Phypa1|1446,Phypa1|1452,Phypa1|36650  
     Phypa1|13974  
 AT4G29160.1,AT2G19830.1    Phypa1|39017  
 AT5G04850.1,AT3G10640.1    Phypa1|2436,Phypa1|32955  
     Phypa1|16110  
     Phypa1|16112  
 AT3G27070.1,AT3G27080.1    Phypa1|39503,Phypa1|23713  
 AT5G40930.1  
 AT1G27390.1  
 AT1G47290.2,AT2G26260.1    Phypa1|29293  
 AT2G43420.1  
 AT4G19390.1    Phypa1|35487  
 AT5G13720.1    Phypa1|30243,Phypa1|35964  
 AT3G59770.1    Phypa1|28088



AT3G48570.1,AT4G24920.1,AT5G50460.1 Phypa1|37074,Phypa1|24466,Phypa1|13938,Phypa1|39660  
AT5G28550.1,AT4G22970.1 Phypa1|32483  
ATCG00740.1 Phypa1|34316,Phypa1|10604  
Phypa1|31351  
AT3G01020.1,AT4G04080.1,AT4G22220.1 Phypa1|2145,Phypa1|2147  
Phypa1|30965  
AT5G08560.1 Phypa1|28111,Phypa1|13040  
AT5G43920.1  
AT4G26210.1,AT4G29480.1,AT2G19680.1 Phypa1|37210  
Phypa1|33659  
AT5G60790.1 Phypa1|37497,Phypa1|39476,Phypa1|32259  
AT1G64550.1 Phypa1|38577  
AT3G54540.1 Phypa1|36898,Phypa1|27825  
AT5G64840.1,AT5G09930.1 Phypa1|38143,Phypa1|1367  
Phypa1|41  
Phypa1|3050  
Phypa1|31223,Phypa1|30727  
Phypa1|21733  
Phypa1|33869,Phypa1|30993  
Phypa1|16723  
AT3G24800.1 Phypa1|30271,Phypa1|122  
Phypa1|38778,Phypa1|37267,Phypa1|39066  
AT2G46290.1,AT2G46280.1 Phypa1|36247,Phypa1|23835,Phypa1|32461  
AT2G05990.1 Phypa1|27460,Phypa1|25540  
Phypa1|30918  
AT4G21670.1 Phypa1|26047,Phypa1|36308  
AT5G01270.1  
AT1G61850.1 Phypa1|26760  
ATCG00820.1 Phypa1|22592  
AT1G27950.1 Phypa1|1684,Phypa1|35335,Phypa1|34334,Phypa1|24743  
AT2G13820.1,AT1G03103.1,AT4G14815.1,AT3G22580.1,AT2G48130.1,AT3G22600.1,AT3G43720.1  
Phypa1|29313,Phypa1|1604,Phypa1|33136  
AT2G27130.1  
AT5G64080.1,AT4G08670.1,AT5G09370.1,AT1G36150.1  
AT2G48140.1,AT3G22620.1  
AT3G17920.1,AT1G48540.1 Phypa1|33885  
Phypa1|6999  
AT2G22310.1,AT4G39910.1 Phypa1|38762,Phypa1|26881,Phypa1|31607  
AT1G76300.1,AT1G20580.1 Phypa1|32406,Phypa1|2592,Phypa1|25708  
Phypa1|24923  
Phypa1|2390  
AT4G28470.1,AT2G20580.1 Phypa1|35947,Phypa1|30616  
AT4G08140.1  
AT3G07670.1 Phypa1|24940  
Phypa1|31799  
Phypa1|34569  
AT4G19860.1 Phypa1|29236,Phypa1|27163,Phypa1|30078  
AT3G03310.1  
AT2G32170.1,AT2G32160.2 Phypa1|29420,Phypa1|23891  
ATCG01240.1,ATCG00900.1 Phypa1|22901  
AT2G24270.1 Phypa1|26102,Phypa1|24838,Phypa1|2546  
Phypa1|8100  
Phypa1|2701  
AT3G01470.1  
Phypa1|8982,Phypa1|213,Phypa1|209,Phypa1|27382,Phypa1|26637,Phypa1|203,Phypa1|210,Phypa1|25  
627,Phypa1|35980,Phypa1|30657,Phypa1|226,Phypa1|198,Phypa1|30082,Phypa1|200,Phypa1|13980,Phypa1|25729,  
Phypa1|37064  
AT3G01220.1,AT4G40060.1,AT1G26960.1,AT1G69780.1,AT2G22430.1,AT5G15150.1  
AT4G36740.1,AT5G66700.1,AT2G18550.1  
AT5G03790.1,AT2G36610.1  
AT5G53980.1  
AT1G27050.1  
AT2G46680.1,AT3G61890.1  
AT5G65310.1  
AT1G53850.1,AT3G14290.1 Phypa1|36736,Phypa1|26642  
Phypa1|6329  
Phypa1|2599  
AT1G20330.1,AT1G76090.1 Phypa1|2865,Phypa1|28963,Phypa1|14186  
AT5G13710.1 Phypa1|39766  
Phypa1|35865  
AT5G20040.1 Phypa1|33628,Phypa1|18534,Phypa1|35482,Phypa1|4856  
Phypa1|9488  
Phypa1|13670  
AT1G29630.1 Phypa1|24837,Phypa1|37625  
AT1G18090.1  
AT3G54380.1 Phypa1|28808,Phypa1|35872  
AT3G06290.1 Phypa1|32982  
AT1G60170.1 Phypa1|2879  
AT1G70400.2  
AT4G03410.2,AT1G52870.2 Phypa1|578,Phypa1|28609  
AT3G27830.1,AT3G27840.1,AT3G27850.1 Phypa1|757,Phypa1|2170,Phypa1|1183,Phypa1|1592  
AT2G32560.1,AT2G26850.1 Phypa1|34537,Phypa1|21973,Phypa1|29086

AT2G41170.1  
AT3G46100.1 Phypa1|30559,Phypa1|25935  
AT5G03406.1  
AT5G07340.1,AT5G61790.1 Phypa1|37382,Phypa1|25433,Phypa1|2885  
Phypa1|26998  
AT5G47770.1,AT4G17190.1 Phypa1|38923  
AT5G28640.1 Phypa1|32815,Phypa1|34212,Phypa1|3375,Phypa1|33775  
AT2G40030.1,AT1G63020.1 Phypa1|10765,Phypa1|2290,Phypa1|33477  
Phypa1|16502  
AT1G09330.1 Phypa1|24690,Phypa1|39000  
Phypa1|4019  
Phypa1|2139  
AT5G42810.1,AT1G58936.1,AT1G22100.1,AT1G59312.1,AT1G58643.1 Phypa1|26210,Phypa1|25516  
AT1G62320.1,AT4G22120.1,AT4G02900.1,AT4G15430.1,AT3G21620.1,AT4G04340.1,AT1G32090.1  
Phypa1|30062,Phypa1|24944  
AT1G30360.1  
Phypa1|36551,Phypa1|36475,Phypa1|23878,Phypa1|37633,Phypa1|38222,Phypa1|11560,Phypa1|27176,  
Phypa1|13169  
AT1G69450.1,AT1G10090.1,AT3G01100.1 Phypa1|36830,Phypa1|26725  
AT1G11960.1  
AT3G54510.1  
AT1G58520.1  
Phypa1|6392,Phypa1|37184,Phypa1|36355  
Phypa1|12142  
AT3G61070.1,AT1G01820.1,AT2G45740.1 Phypa1|2505,Phypa1|38112  
AT5G53920.1 Phypa1|26821  
AT1G03770.1 Phypa1|35718  
Phypa1|22584  
AT1G10700.1 Phypa1|39386,Phypa1|33419  
AT2G42910.1  
AT4G11560.1 Phypa1|35042,Phypa1|37176  
AT4G23120.1,AT2G25120.1,AT3G43990.1  
AT2G42790.1,AT3G58750.1 Phypa1|24826,Phypa1|33008  
AT3G58740.1  
Phypa1|22026,Phypa1|30500  
AT5G11260.1 Phypa1|38852,Phypa1|27020  
AT3G17609.2  
AT1G33780.1,AT3G29240.1 Phypa1|32337  
AT5G04930.1 Phypa1|25909,Phypa1|25961  
AT3G13900.1,AT1G54280.1,AT1G17500.1,AT1G72700.1 Phypa1|37250,Phypa1|38425  
AT5G44240.1 Phypa1|34400  
AT1G59820.1 Phypa1|33533  
AT3G25610.1,AT1G13210.1,AT1G68710.1,AT1G26130.1,AT3G27870.1  
AT3G18700.1  
Phypa1|14560,Phypa1|401  
AT2G47640.1,AT3G62840.1 Phypa1|26167,Phypa1|15533,Phypa1|29762  
AT5G19740.1 Phypa1|30397,Phypa1|28747  
AT4G07670.1  
AT3G54720.1  
Phypa1|30686  
AT1G79210.1,AT1G16470.1 Phypa1|38667,Phypa1|3564  
AT1G10170.1 Phypa1|37644  
AT5G05660.1 Phypa1|28085  
AT4G14290.1,AT3G23540.1 Phypa1|27811,Phypa1|29634  
AT4G17150.1  
AT2G35120.1,AT2G35370.1,AT1G32470.1 Phypa1|37100  
Phypa1|24052  
AT3G57200.1,AT3G08550.1 Phypa1|39126,Phypa1|28221  
AT2G41450.1  
AT2G27680.1 Phypa1|24763  
Phypa1|561  
Phypa1|26276  
AT1G75440.1,AT4G36410.1,AT5G42990.1,AT1G45050.1 Phypa1|39347  
Phypa1|15997  
AT1G11750.1 Phypa1|1496,Phypa1|187  
AT5G45390.1 Phypa1|185,Phypa1|3791  
AT5G23140.1 Phypa1|11869  
AT4G17040.1 Phypa1|37104,Phypa1|25342,Phypa1|29099  
AT1G12410.1 Phypa1|27968,Phypa1|28468  
AT1G02560.1 Phypa1|29043,Phypa1|25142,Phypa1|36514  
AT1G66670.1 Phypa1|28634,Phypa1|1094  
ATCG00670.1  
Phypa1|31057  
AT4G10790.1 Phypa1|60,Phypa1|3082  
Phypa1|4717,Phypa1|24957  
AT5G56360.1 Phypa1|11300  
AT2G42390.1  
AT2G43180.1 Phypa1|29307  
AT1G77060.1,AT1G21440.1  
AT5G57850.1 Phypa1|27532  
Phypa1|1921,Phypa1|39091  
AT3G02040.1,AT5G43300.1,AT5G41080.1 Phypa1|171,Phypa1|27611,Phypa1|26785,Phypa1|29764

AT3G60800.1 Phypa1|29805  
AT4G22750.1  
AT4G00840.1  
AT1G78050.1,AT1G22170.1 Phypa1|27063,Phypa1|23736  
Phypa1|15834  
Phypa1|24803,Phypa1|29029  
AT4G37110.1 Phypa1|32629  
AT2G23530.1  
AT1G31812.1 Phypa1|35982,Phypa1|24144  
AT1G80070.1 Phypa1|38918,Phypa1|38119  
AT4G38780.1  
AT5G64270.1 Phypa1|36036  
Phypa1|3524  
Phypa1|3525  
AT1G05140.1,AT2G32480.1 Phypa1|24500,Phypa1|29057,Phypa1|34328  
ATCG00905.1,ATCG01230.1,ATCG00065.1 Phypa1|394  
ATMG00980.1,AT2G07675.1  
AT3G25410.1 Phypa1|29148,Phypa1|28335  
AT4G12030.2,AT4G22840.1 Phypa1|30174  
AT4G36850.1 Phypa1|36013  
AT4G20100.1,AT2G41050.1  
Phypa1|31735  
AT1G16180.1 Phypa1|26976  
AT3G06170.1  
AT1G48030.1,AT3G17240.1 Phypa1|23890  
Phypa1|30899  
Phypa1|18309  
AT5G01770.1,AT3G08850.1 Phypa1|38859,Phypa1|25461,Phypa1|37571,Phypa1|33930  
AT3G09200.1,AT2G40010.1,AT3G11250.1 Phypa1|36409,Phypa1|36388  
AT3G25040.1 Phypa1|39466,Phypa1|32271  
AT1G29330.1  
AT4G31480.1,AT4G31490.1 Phypa1|32675,Phypa1|39220,Phypa1|39568  
AT4G14455.1,AT3G58170.1 Phypa1|37840,Phypa1|24091  
AT3G05675.1 Phypa1|13569,Phypa1|30067,Phypa1|14366,Phypa1|26230  
AT4G10800.1  
AT2G30200.1 Phypa1|7576  
Phypa1|30584,Phypa1|31144  
AT1G71360.1,AT1G22882.1 Phypa1|6869,Phypa1|34513  
AT4G23950.1  
AT5G38200.1,AT1G66860.1,AT1G15040.1 Phypa1|37245  
Phypa1|31124  
AT3G02900.1,AT5G16660.1 Phypa1|34842  
AT1G42960.1  
AT3G07660.1,AT3G13222.1 Phypa1|11064,Phypa1|34605  
AT1G54370.1,AT1G79610.1 Phypa1|28412  
Phypa1|16494  
Phypa1|16495  
Phypa1|26969  
Phypa1|6059  
AT3G62130.1,AT5G26600.1 Phypa1|1374,Phypa1|36077  
AT1G07010.1 Phypa1|115,Phypa1|109  
AT3G16910.1 Phypa1|16931  
AT1G66120.1,AT1G65890.1,AT1G20560.1,AT1G65880.1,AT5G16340.1,AT1G75960.1  
AT1G21540.1,AT1G77240.1,AT5G16370.1,AT1G21530.1  
AT1G76290.1  
AT5G05987.1,AT3G11397.1,AT5G02040.1 Phypa1|39734,Phypa1|39383,Phypa1|32819  
AT1G28490.2 Phypa1|32993,Phypa1|26732  
Phypa1|27805  
Phypa1|11455  
AT3G45280.1,AT3G61450.1,AT3G09740.1 Phypa1|27420  
Phypa1|27536  
AT1G79040.1 Phypa1|32956,Phypa1|32658,Phypa1|24131,Phypa1|32957  
AT1G42470.1 Phypa1|27381,Phypa1|24705  
AT4G38350.1  
AT5G66550.1,AT5G42770.1 Phypa1|36490  
AT2G25500.1  
AT2G17200.1,AT2G17190.1 Phypa1|28213,Phypa1|26795,Phypa1|935  
AT3G18680.2 Phypa1|2954,Phypa1|24833  
AT3G10030.1  
Phypa1|22186  
AT1G71940.1,AT4G09580.1,AT4G17790.1 Phypa1|26385,Phypa1|23831,Phypa1|25097  
AT3G09920.1 Phypa1|1358,Phypa1|1760  
AT1G01460.1,AT4G01190.1,AT1G21980.1  
AT1G77740.1,AT3G07960.1,AT1G60890.1,AT2G26420.1  
AT1G10900.1  
AT3G56960.1,AT2G41210.1  
AT2G02370.1 Phypa1|190  
AT4G12000.1,AT4G22850.1,AT1G12450.1  
AT1G08370.1 Phypa1|36569,Phypa1|34580,Phypa1|39547  
Phypa1|36070  
AT5G05920.1 Phypa1|27131,Phypa1|29412  
AT2G46470.1,AT5G62050.1 Phypa1|35429

AT1G09575.1,AT1G57610.1 Phypa1|1998,Phypa1|1999,Phypa1|1490  
AT5G56610.1,AT2G35680.1 Phypa1|25206  
Phypa1|5336  
AT1G14310.1 Phypa1|26741  
AT2G41250.1  
AT1G78770.1 Phypa1|30533  
AT2G26070.1 Phypa1|25425,Phypa1|25463  
AT3G51040.1  
AT1G06800.1,AT1G51440.1,AT2G30550.2 Phypa1|29436,Phypa1|29431  
AT1G05800.1,AT2G31690.1  
AT2G44810.1,AT1G30370.1  
Phypa1|16255,Phypa1|4728  
Phypa1|75,Phypa1|8913  
Phypa1|6351  
AT3G26060.1 Phypa1|27353,Phypa1|25573  
Phypa1|31312  
Phypa1|27959,Phypa1|29273  
AT1G73030.1,AT1G17730.1 Phypa1|26699,Phypa1|38525,Phypa1|39694,Phypa1|35992  
AT1G34200.1,AT4G09670.1 Phypa1|24212,Phypa1|36026  
AT1G66130.1  
Phypa1|30772  
AT2G28140.1,AT3G44940.1,AT5G22930.1 Phypa1|708,Phypa1|707  
AT5G59760.1  
AT3G24010.1 Phypa1|39510  
AT1G54390.2 Phypa1|37455  
AT4G21590.1,AT4G21600.1,AT4G21585.1 Phypa1|167  
AT1G11190.1,AT1G68290.1  
Phypa1|30747  
AT2G19920.1,AT2G19910.1,AT2G19930.1 Phypa1|34773,Phypa1|35638  
AT2G18350.1,AT1G75240.1 Phypa1|38142,Phypa1|37723,Phypa1|24520,Phypa1|28357  
AT5G60480.1,AT5G39760.1,AT3G28920.1,AT1G69600.1  
AT5G15210.1,AT2G02540.1,AT4G24660.1,AT5G65410.1,AT1G14440.1  
AT3G28917.1,AT1G74660.1  
AT3G50890.1  
AT5G42780.1  
AT1G14687.1  
AT1G52855.1,AT2G20835.1 Phypa1|27861,Phypa1|24347  
AT5G02480.1,AT3G12570.1,AT2G37570.1 Phypa1|34185,Phypa1|36004,Phypa1|38087  
AT4G04770.1 Phypa1|24326,Phypa1|25894  
AT5G44316.1  
Phypa1|21982  
Phypa1|30097  
Phypa1|21981  
AT2G20190.1 Phypa1|29047,Phypa1|25139  
Phypa1|4209  
Phypa1|8813  
AT3G56160.1 Phypa1|32984  
AT4G05520.1,AT3G20290.1 Phypa1|30539,Phypa1|34158  
AT1G48410.2 Phypa1|28638,Phypa1|31631,Phypa1|38398  
AT2G27040.1,AT5G21030.1,AT2G32940.1,AT5G21150.1 Phypa1|25235,Phypa1|38113,Phypa1|27652  
AT1G31280.1,AT1G69440.1  
AT5G43810.1  
AT2G27880.1  
AT1G31290.1  
AT3G04830.1,AT5G28220.1 Phypa1|581  
AT4G10300.1 Phypa1|29062  
AT4G10280.1,AT4G10290.1  
AT4G28703.1,AT3G04300.1  
AT3G44100.1,AT3G11780.1,AT5G06480.1 Phypa1|27845,Phypa1|26749  
AT3G18880.1,AT1G49400.1 Phypa1|1697  
AT4G15130.1,AT2G32260.1 Phypa1|1448,Phypa1|1447,Phypa1|1980  
AT1G05270.1 Phypa1|20638,Phypa1|130  
AT2G32340.1  
Phypa1|35595,Phypa1|11535  
AT4G22260.1 Phypa1|27112,Phypa1|1456  
Phypa1|37638  
AT1G17820.1,AT1G73200.1 Phypa1|32047,Phypa1|34561,Phypa1|34924,Phypa1|36374  
Phypa1|27568  
AT4G19150.1 Phypa1|35088  
AT2G03430.1  
AT3G63170.1 Phypa1|28138  
AT2G26310.1 Phypa1|35527  
AT5G43260.1 Phypa1|23774,Phypa1|32408,Phypa1|23706,Phypa1|24054,Phypa1|39523  
Phypa1|24986  
AT1G44446.1 Phypa1|29766,Phypa1|29189  
AT5G05140.1,AT3G10820.1 Phypa1|35384  
AT5G27280.1 Phypa1|32664  
AT1G68730.1 Phypa1|17155  
AT1G27310.1,AT1G27970.1 Phypa1|23912  
AT1G11570.1  
Phypa1|38774  
Phypa1|24869

AT1G15500.1,AT1G80300.1 Phypa1|37820,Phypa1|28575  
AT4G05420.1,AT4G21100.1 Phypa1|39323,Phypa1|21411  
AT2G39650.1 Phypa1|34811,Phypa1|652,Phypa1|2044,Phypa1|1460  
AT2G38820.2,AT4G14620.1,AT3G22970.1,AT3G54550.1  
Phypa1|196,Phypa1|2308,Phypa1|2002,Phypa1|2016,Phypa1|151,Phypa1|2020  
AT1G77160.1,AT1G77145.1  
AT1G62420.1,AT1G12030.1,AT3G07350.1,AT3G25240.1  
AT4G32480.1,AT2G20670.1  
Phypa1|1345,Phypa1|2041  
Phypa1|1316,Phypa1|27503,Phypa1|2052,Phypa1|1319,Phypa1|29134,Phypa1|1317  
Phypa1|1315  
AT5G51660.1 Phypa1|2667  
Phypa1|3628  
AT2G42450.1 Phypa1|35092  
Phypa1|33711,Phypa1|31805,Phypa1|34913,Phypa1|34461,Phypa1|12592  
AT5G08280.1 Phypa1|37915,Phypa1|29775,Phypa1|27781  
Phypa1|30868  
AT1G48430.1,AT3G17770.1 Phypa1|37831,Phypa1|26704  
Phypa1|2653  
AT4G20330.1,AT4G21010.1 Phypa1|28982,Phypa1|37374  
AT3G56190.1 Phypa1|31806,Phypa1|2501,Phypa1|34567  
AT3G56450.1  
Phypa1|28286  
AT4G34450.1 Phypa1|25079,Phypa1|35165,Phypa1|32644  
Phypa1|32936  
AT2G42400.1,AT1G28520.1 Phypa1|38978,Phypa1|37659  
Phypa1|19808  
Phypa1|38977  
AT3G57620.1,AT1G75620.1,AT1G19900.1,AT1G14430.1 Phypa1|38226,Phypa1|13989  
AT3G53950.1  
Phypa1|38334,Phypa1|36829,Phypa1|39251,Phypa1|36619,Phypa1|2641,Phypa1|37314,Phypa1|2961,Phypa1|30560,Phypa1|20304,Phypa1|25497  
AT5G19580.1,AT1G67290.1  
Phypa1|4404  
Phypa1|11331  
Phypa1|21468,Phypa1|23968,Phypa1|38417,Phypa1|24019,Phypa1|37136,Phypa1|28304,Phypa1|26093,  
Phypa1|29095,Phypa1|22416,Phypa1|24276,Phypa1|32503,Phypa1|38733,Phypa1|24288,Phypa1|37451,Phypa1|386  
33,Phypa1|34632,Phypa1|25826,Phypa1|30135,Phypa1|36548  
Phypa1|7732,Phypa1|11239  
Phypa1|27401  
Phypa1|22731  
Phypa1|16247  
Phypa1|11468  
AT1G09830.1 Phypa1|36047,Phypa1|28657  
Phypa1|20564  
AT1G16460.2,AT1G79230.1 Phypa1|38793  
Phypa1|23480,Phypa1|31280  
AT3G23810.1,AT4G13940.1 Phypa1|36168,Phypa1|25263,Phypa1|36165  
Phypa1|25250  
AT4G09830.1 Phypa1|36679,Phypa1|727  
AT5G64780.1  
AT4G33400.1,AT3G19240.1 Phypa1|37946,Phypa1|30704,Phypa1|36993  
AT2G47780.1,AT3G05500.1 Phypa1|39456  
AT1G67360.1  
AT1G27360.1,AT5G43270.1,AT1G27370.1 Phypa1|34543,Phypa1|8410,Phypa1|34542  
AT1G02065.1 Phypa1|12768,Phypa1|16021,Phypa1|8412,Phypa1|5816,Phypa1|19740,Phypa1|17851  
AT1G69170.1  
AT3G57920.1,AT2G42200.1  
AT2G33810.1  
AT5G50670.1,AT5G50570.1  
AT5G19400.1 Phypa1|19199,Phypa1|10562  
AT1G28260.1  
Phypa1|32254  
AT2G25660.1 Phypa1|37809  
AT1G74440.1,AT1G18720.1 Phypa1|2614,Phypa1|24221  
Phypa1|27538  
AT1G05860.1,AT3G53860.1,AT2G31600.1 Phypa1|35825  
AT4G03560.1 Phypa1|26133,Phypa1|29495  
Phypa1|25749,Phypa1|5420,Phypa1|5648,Phypa1|33497,Phypa1|34325,Phypa1|32182,Phypa1|34922  
AT5G08550.1 Phypa1|38888  
AT5G09210.1  
AT1G26665.1,AT5G41910.1 Phypa1|33425  
AT5G53480.1 Phypa1|39599,Phypa1|37606  
AT4G04640.1 Phypa1|29757,Phypa1|30317,Phypa1|25783  
AT1G15700.1  
Phypa1|31046  
AT1G02880.3,AT2G44750.2 Phypa1|29250,Phypa1|27762  
AT5G56300.1,AT5G55250.1 Phypa1|30103,Phypa1|28955  
AT5G66430.1,AT2G14060.1,AT5G04370.2,AT3G11480.1,AT1G19640.1,AT5G38020.1,AT3G21950.1,AT5G04380.1,AT4G36470.1  
AT5G14660.1 Phypa1|29577  
Phypa1|30774,Phypa1|31378,Phypa1|31126

AT2G48110.1,AT3G23590.1 Phypa1|27591,Phypa1|25357  
 AT2G46260.1,AT3G61600.1 Phypa1|26041,Phypa1|37277  
 AT4G01160.1  
 AT5G43780.1,AT4G14680.1,AT3G22890.1 Phypa1|30119,Phypa1|28532  
 AT1G19920.1  
 AT3G50820.1,AT5G66570.1 Phypa1|38098,Phypa1|39566,Phypa1|36216,Phypa1|36648  
 AT4G37230.1  
 AT1G56230.1 Phypa1|15172,Phypa1|19246,Phypa1|8441,Phypa1|35809,Phypa1|28241  
 AT3G09100.2,AT5G28210.1,AT5G01290.1 Phypa1|25041  
 AT5G20610.1,AT5G26160.1 Phypa1|102,Phypa1|29917  
 Phypa1|6653  
 Phypa1|23756  
 Phypa1|31841  
 AT5G05010.1 Phypa1|31739,Phypa1|23686,Phypa1|38297,Phypa1|24150  
 AT3G59280.1 Phypa1|36477,Phypa1|38377  
 AT5G61880.1  
 AT2G32810.1 Phypa1|37522,Phypa1|36019  
 AT1G31740.1,AT3G13750.1,AT5G20710.1,AT4G36360.1,AT2G28470.1  
 AT3G53080.1  
 AT1G45130.1,AT4G26140.1,AT3G52840.1,AT5G56870.1  
 AT5G63810.1  
 AT2G16730.1,AT5G63800.1,AT4G35010.1,AT1G77410.1,AT4G38590.1  
 AT2G04060.1  
 Phypa1|25400,Phypa1|28787  
 AT5G63100.1 Phypa1|162,Phypa1|27324  
 AT5G44590.1,AT5G44600.1 Phypa1|26139  
 Phypa1|35781  
 AT1G05790.1 Phypa1|28850,Phypa1|29303  
 AT3G10620.1,AT5G06340.1 Phypa1|1541  
 AT1G30110.1  
 AT4G27700.1 Phypa1|717  
 Phypa1|26830  
 AT5G47110.1,AT4G17600.1 Phypa1|215,Phypa1|2061,Phypa1|1112  
 AT2G31090.1 Phypa1|25422,Phypa1|38238  
 Phypa1|36207  
 AT4G36390.1 Phypa1|25437  
 Phypa1|31239  
 Phypa1|31251  
 AT1G51130.1,AT3G20760.1 Phypa1|29698  
 AT3G57480.1,AT2G41835.1 Phypa1|27105  
 AT5G48205.1  
 Phypa1|1582,Phypa1|224  
 AT3G56240.1,AT1G66240.1 Phypa1|37052  
 AT4G08570.1  
 Phypa1|1716,Phypa1|362,Phypa1|33235,Phypa1|2234  
 AT2G35155.1,AT5G45030.1,AT3G12950.1 Phypa1|30392  
 Phypa1|1828,Phypa1|2254  
 AT3G03570.1 Phypa1|29913,Phypa1|28548,Phypa1|25233,Phypa1|25637,Phypa1|30628  
 AT4G40050.1  
 AT4G24820.1 Phypa1|36753,Phypa1|38640  
 Phypa1|14735  
 AT5G45930.1,AT4G18480.1 Phypa1|26289,Phypa1|25574  
 Phypa1|1681  
 Phypa1|29721  
 AT5G38110.1,AT1G66740.1 Phypa1|38118,Phypa1|37977,Phypa1|2127,Phypa1|243  
 AT5G04590.1 Phypa1|37853,Phypa1|39193,Phypa1|32805  
 Phypa1|29708  
 AT2G38280.1 Phypa1|38788,Phypa1|29881,Phypa1|28562  
 AT1G02010.1,AT4G12120.1,AT1G12360.1 Phypa1|38131  
 Phypa1|14009  
 AT4G34215.1 Phypa1|36200  
 AT3G53010.1  
 AT4G02260.1 Phypa1|28829,Phypa1|28852  
 Phypa1|30449  
 AT2G37170.1,AT3G53420.1,AT5G60660.1,AT2G37180.1,AT3G54820.1  
 Phypa1|38631,Phypa1|38200,Phypa1|37807  
 AT4G23400.1,AT2G45960.1,AT3G61430.1,AT1G01620.1,AT4G00430.1 Phypa1|33712,Phypa1|2413  
 AT2G16850.1,AT4G35100.1  
 AT2G39010.1  
 Phypa1|27808,Phypa1|12811  
 Phypa1|24691,Phypa1|35316  
 AT4G30930.1 Phypa1|3377  
 AT1G35680.1  
 AT5G11880.1,AT3G14390.1 Phypa1|3046,Phypa1|38754  
 Phypa1|31364  
 AT1G33230.1,AT4G10430.1 Phypa1|27254,Phypa1|38932,Phypa1|35557  
 Phypa1|28941  
 AT3G57140.1,AT5G04040.1 Phypa1|25623,Phypa1|26052  
 Phypa1|31058  
 AT1G72040.1 Phypa1|26797  
 Phypa1|9852  
 Phypa1|16250

Phypa1|33476  
 Phypa1|22720  
 AT1G51310.1 Phypa1|501  
 Phypa1|31113,Phypa1|23466,Phypa1|28216  
 AT2G34770.1,AT4G20870.1 Phypa1|38975  
 Phypa1|26643,Phypa1|9825  
 Phypa1|26435,Phypa1|25414  
 AT1G76250.1 Phypa1|1015,Phypa1|36230,Phypa1|28997,Phypa1|29672  
 Phypa1|29416  
 AT5G43360.1,AT2G38940.1,AT5G43370.1,AT5G43350.1,AT2G32830.1  
 Phypa1|30642,Phypa1|23758,Phypa1|29838  
 AT4G08878.1  
 Phypa1|37561,Phypa1|24155  
 Phypa1|10333  
 Phypa1|25668  
 AT3G01310.1,AT5G15070.1 Phypa1|36760,Phypa1|37083  
 AT5G65840.1 Phypa1|30649  
 AT3G17210.1 Phypa1|36891  
 AT2G44270.1 Phypa1|24156  
 AT1G76170.1  
 AT5G11040.1 Phypa1|37687,Phypa1|28652  
 AT5G66680.1 Phypa1|38753  
 AT4G02610.1,AT3G54640.1 Phypa1|24994  
 Phypa1|31235  
 AT1G12770.1 Phypa1|959  
 AT3G53110.1 Phypa1|30892,Phypa1|28097  
 AT2G40700.1 Phypa1|27417  
 AT5G63630.1,AT1G63250.1,AT5G08620.1,AT5G08610.1,AT2G07750.1 Phypa1|29283  
 AT3G09720.1 Phypa1|1803  
 AT3G01540.3,AT5G14610.1 Phypa1|23936,Phypa1|36436  
 AT1G16280.1 Phypa1|39297  
 AT3G19760.1 Phypa1|24114,Phypa1|2975  
 AT5G26742.2 Phypa1|26390,Phypa1|24712,Phypa1|1369  
 AT4G00660.1,AT3G61240.1,AT2G45810.1 Phypa1|10596,Phypa1|27200  
 AT5G11170.1,AT5G11200.1 Phypa1|19191,Phypa1|37164  
 AT5G51280.1 Phypa1|39363  
 AT5G05450.1,AT1G71370.1 Phypa1|25962  
 AT1G71280.1,AT3G58570.1,AT4G33370.1,AT5G63120.2,AT3G22330.1,AT1G20920.1,AT2G47330.1,AT3G02065.3,A  
 T3G13920.2,AT1G55150.1,AT3G58510.1,AT4G34910.1,AT4G09730.1,AT1G72730.1,AT1G51380.1,AT5G60990.1,AT  
 1G77050.1,AT5G54910.1,AT3G18600.1,AT3G06480.1,AT2G42520.1,AT3G06980.1,AT1G54270.1,AT3G22310.1,AT1  
 G31970.1,AT5G62190.1,AT3G16840.1 Phypa1|29878  
 AT5G19210.2 Phypa1|17506  
 AT1G59990.1 Phypa1|36546  
 AT4G16630.1 Phypa1|25545  
 AT4G15850.1 Phypa1|28679  
 AT2G33730.1 Phypa1|38782  
 AT3G09620.1  
 Phypa1|31399,Phypa1|30902  
 Phypa1|17842  
 Phypa1|20745  
 Phypa1|20749  
 Phypa1|25776  
 Phypa1|3025  
 Phypa1|1916  
 Phypa1|30853,Phypa1|30740  
 Phypa1|2244  
 Phypa1|36627  
 Phypa1|39671,Phypa1|23932,Phypa1|25616,Phypa1|33371  
 Phypa1|926,Phypa1|23966,Phypa1|32,Phypa1|34267  
 Phypa1|31790  
 Phypa1|18304,Phypa1|26734  
 Phypa1|29647,Phypa1|38381  
 Phypa1|31197,Phypa1|35880,Phypa1|27822,Phypa1|27819  
 Phypa1|36641,Phypa1|30270  
 Phypa1|26691,Phypa1|32618  
 Phypa1|33826,Phypa1|3921,Phypa1|1391,Phypa1|39794,Phypa1|911,Phypa1|31375,Phypa1|33146,Phyp  
 a1|29477,Phypa1|8701,Phypa1|36248,Phypa1|1363  
 Phypa1|25121  
 Phypa1|24871  
 AT3G24190.1 Phypa1|37962,Phypa1|32218  
 AT1G71810.1 Phypa1|28978,Phypa1|28907  
 AT1G79600.1 Phypa1|36724  
 AT5G24970.1 Phypa1|37428  
 AT4G31390.1 Phypa1|28723  
 AT2G39190.2 Phypa1|37507,Phypa1|26117  
 Phypa1|28570,Phypa1|26864  
 Phypa1|27789  
 Phypa1|6916  
 Phypa1|22668  
 Phypa1|12236  
 AT3G19190.1 Phypa1|28418  
 AT5G63850.1,AT1G44100.1,AT5G09220.1,AT5G49630.1,AT1G77380.1 Phypa1|30391

AT1G10010.1,AT1G58360.1  
AT5G23810.1  
Phypa1|2786  
AT4G35750.1,AT3G10210.1 Phypa1|24998  
AT5G20570.1 Phypa1|39041,Phypa1|26039  
AT3G42830.1  
AT2G32010.1,AT3G63240.1,AT5G65090.1,AT5G04980.1,AT1G05470.1,AT4G18010.1  
Phypa1|3026,Phypa1|29453,Phypa1|2504,Phypa1|24897,Phypa1|1817,Phypa1|25502  
AT1G47510.1 Phypa1|149,Phypa1|31974  
AT1G34120.2,AT1G71710.1  
AT2G37440.1,AT2G01900.1  
AT1G55480.1 Phypa1|25258  
AT4G28550.1,AT2G20440.1,AT5G54780.1,AT4G27100.1 Phypa1|24604,Phypa1|24650  
AT3G55020.1,AT2G39280.1 Phypa1|25646  
AT2G37290.1  
Phypa1|34307  
AT2G35800.1 Phypa1|910,Phypa1|36658  
AT2G26360.1  
AT4G27940.1,AT2G46320.1 Phypa1|28076,Phypa1|27498  
AT3G02090.2 Phypa1|36847  
Phypa1|23311  
Phypa1|1515  
AT4G23440.1 Phypa1|28607,Phypa1|27433,Phypa1|27132  
AT5G56220.1  
AT1G44910.1 Phypa1|11811,Phypa1|34379  
AT3G19670.1  
Phypa1|11812  
AT4G08580.1,AT5G17900.1 Phypa1|31859  
AT2G07690.1 Phypa1|30250  
AT2G16440.1 Phypa1|34357  
AT4G02060.1 Phypa1|36298  
AT2G14050.1 Phypa1|25797  
AT3G09660.1 Phypa1|904  
AT5G46280.1 Phypa1|24769  
AT1G44900.1 Phypa1|36259  
AT5G44635.1 Phypa1|29025  
Phypa1|30957  
AT4G15180.1 Phypa1|37926,Phypa1|39043  
AT5G39490.1,AT5G39450.1,AT5G39460.1,AT5G39480.1 Phypa1|1832,Phypa1|37462  
AT5G14540.1,AT3G01560.1 Phypa1|25615  
Phypa1|38093,Phypa1|37155  
AT1G15130.1 Phypa1|39642,Phypa1|3045  
AT3G63460.1,AT1G18830.1 Phypa1|29712,Phypa1|2898  
AT5G14980.1,AT5G19290.1 Phypa1|35978,Phypa1|37328  
AT3G62860.1,AT2G47630.1 Phypa1|36442,Phypa1|36843,Phypa1|30405  
AT1G11090.1 Phypa1|26001  
AT1G52760.1 Phypa1|23720  
AT1G77420.1,AT5G16120.1 Phypa1|25277,Phypa1|27240,Phypa1|2768,Phypa1|30159  
AT3G55190.1,AT3G55180.1,AT2G39410.2,AT2G39420.1,AT2G39400.1  
AT5G08530.1 Phypa1|24961,Phypa1|29389  
Phypa1|3962  
AT1G04170.1 Phypa1|37605  
AT2G18720.1,AT4G18330.2  
AT5G09880.1,AT2G16940.1 Phypa1|37965,Phypa1|34685  
AT5G12230.1,AT5G19480.1 Phypa1|32242,Phypa1|35359,Phypa1|31643  
Phypa1|32273  
AT5G24020.1 Phypa1|38651,Phypa1|38418  
Phypa1|23447,Phypa1|22810  
AT4G35550.1 Phypa1|239,Phypa1|235  
AT1G20710.1,AT1G20700.1  
AT5G49030.1 Phypa1|2573  
Phypa1|21353  
AT4G10320.1 Phypa1|39292  
Phypa1|9473  
Phypa1|30905  
AT5G35750.1,AT2G01830.2,AT1G27320.1 Phypa1|17856,Phypa1|36525,Phypa1|28839  
AT2G17820.1 Phypa1|25016,Phypa1|26003  
Phypa1|37824,Phypa1|37992,Phypa1|1743,Phypa1|34084  
Phypa1|35464,Phypa1|14755,Phypa1|34650,Phypa1|31951,Phypa1|5135,Phypa1|32706,Phypa1|33510  
Phypa1|31886  
Phypa1|7897  
Phypa1|31428  
Phypa1|36112  
Phypa1|26304,Phypa1|154,Phypa1|24436,Phypa1|28695,Phypa1|25588  
AT4G25910.1,AT5G49940.1 Phypa1|1152  
AT5G64070.1,AT5G09350.1 Phypa1|37090,Phypa1|29537  
AT5G39220.1,AT1G13820.1 Phypa1|25256  
AT4G04910.1 Phypa1|37981  
Phypa1|34974  
Phypa1|6594  
Phypa1|30414  
Phypa1|19709



AT3G18640.1,AT3G26850.1 Phypa1|292  
AT4G33210.1 Phypa1|25353,Phypa1|28707,Phypa1|36479  
Phypa1|33468,Phypa1|37861  
AT5G53700.1,AT5G03500.1,AT5G03220.1 Phypa1|279  
AT4G18900.1,AT4G18905.1 Phypa1|1863  
AT4G35370.1  
AT3G44530.1 Phypa1|37558,Phypa1|38616  
AT1G10580.1 Phypa1|20478  
AT5G54520.1 Phypa1|25963  
AT4G39850.1 Phypa1|39161  
Phypa1|26393  
Phypa1|23901  
AT5G53180.1 Phypa1|27062,Phypa1|58  
AT3G01150.1  
AT5G08400.1 Phypa1|26333,Phypa1|25098  
AT4G29400.1  
AT1G27470.1,AT4G07410.1 Phypa1|38324,Phypa1|26808  
Phypa1|15715  
AT5G19330.1 Phypa1|23880,Phypa1|23865  
AT5G13060.1  
AT1G67030.1,AT1G68360.1 Phypa1|25763  
AT1G04850.1 Phypa1|39637  
AT5G48690.1  
AT2G26560.1,AT4G37070.2,AT4G37060.1,AT5G43590.1,AT4G37050.1  
Phypa1|24402,Phypa1|3146,Phypa1|39299,Phypa1|28187  
Phypa1|519  
Phypa1|26559  
AT2G45670.1 Phypa1|33128,Phypa1|3526,Phypa1|36389  
Phypa1|38177,Phypa1|27717,Phypa1|1435,Phypa1|38886  
AT5G08580.1 Phypa1|3005,Phypa1|30149  
AT4G27790.1  
AT1G02300.1,AT1G02305.1,AT4G01610.1 Phypa1|38803,Phypa1|38641,Phypa1|23679  
AT1G04080.1 Phypa1|28515,Phypa1|25599,Phypa1|38658  
AT5G46400.1  
Phypa1|13778  
AT5G28840.1 Phypa1|34337,Phypa1|36996,Phypa1|34928  
AT2G34680.1 Phypa1|29671,Phypa1|25815  
AT4G24690.1 Phypa1|38816  
Phypa1|26038  
Phypa1|32666  
AT4G13990.1,AT2G20370.1,AT2G29040.1 Phypa1|30991,Phypa1|30992,Phypa1|24278  
AT5G41250.1,AT1G63450.1 Phypa1|25284,Phypa1|944,Phypa1|25458,Phypa1|65  
AT2G31990.1,AT2G32750.1,AT2G32740.1  
AT5G62220.1  
AT1G68470.1  
Phypa1|1831  
Phypa1|24590,Phypa1|1826,Phypa1|24581,Phypa1|1879,Phypa1|36500  
Phypa1|7912,Phypa1|466,Phypa1|470  
Phypa1|16063,Phypa1|37,Phypa1|31283  
AT2G44900.1,AT3G60350.1 Phypa1|36939,Phypa1|36059  
AT2G14635.1  
Phypa1|27299  
AT2G22125.1 Phypa1|25243,Phypa1|26813  
AT1G44120.1,AT1G77460.1  
AT1G55910.1,AT5G59520.1 Phypa1|29191,Phypa1|37315,Phypa1|25162  
Phypa1|13031  
AT4G10750.1,AT4G24080.1 Phypa1|25464  
Phypa1|30024,Phypa1|19375,Phypa1|31094  
AT3G48050.1,AT3G48060.1 Phypa1|32352  
AT1G17070.1,AT2G42330.1 Phypa1|37874,Phypa1|28493  
Phypa1|847  
AT5G14530.1 Phypa1|25483,Phypa1|37078  
AT5G66240.2  
AT1G75330.1 Phypa1|28789,Phypa1|34736  
Phypa1|31069  
Phypa1|31286  
AT1G11800.1 Phypa1|26110  
Phypa1|34372  
AT3G27430.2,AT5G40580.1 Phypa1|32922,Phypa1|39298  
Phypa1|29067  
AT3G22630.1,AT4G14800.1 Phypa1|36458,Phypa1|38594  
Phypa1|29053  
AT4G31600.1 Phypa1|25605,Phypa1|39719,Phypa1|609  
AT2G13650.1 Phypa1|559  
AT1G07290.1  
AT1G64970.1 Phypa1|38424  
AT5G47730.1,AT1G55840.1 Phypa1|29964,Phypa1|566,Phypa1|26675  
AT4G32160.1,AT3G15920.1,AT2G25350.1 Phypa1|33931,Phypa1|34876  
AT1G52890.1,AT3G15500.1,AT4G27410.2  
Phypa1|28517,Phypa1|29507,Phypa1|24598,Phypa1|28168,Phypa1|25099,Phypa1|27787,Phypa1|29506,  
Phypa1|28516  
AT1G54330.1,AT1G65910.1,AT5G46590.1,AT5G17260.1,AT3G17730.1,AT3G03200.1

Phypa1|24840,Phypa1|698,Phypa1|1135,Phypa1|26114  
AT1G62700.1,AT1G79580.1,AT1G71930.1,AT2G18060.1,AT1G33280.1,AT1G12260.1,AT1G32770.1,AT4G36160.1,A  
T5G66300.1,AT3G61910.1,AT5G62380.1,AT4G10350.1,AT2G46770.1  
Phypa1|37674,Phypa1|28932,Phypa1|28479,Phypa1|26784  
AT5G61430.1,AT3G15170.1,AT5G53950.1 Phypa1|29224,Phypa1|36476,Phypa1|29765  
AT1G26870.1,AT2G02450.2 Phypa1|1614  
AT2G33480.1,AT1G69490.1,AT1G77450.1,AT3G15510.1,AT1G52880.1,AT5G13180.1,AT3G04070.1,AT1G01720.1  
AT5G18300.1,AT1G64105.1  
AT1G02220.1,AT4G01550.1,AT1G02250.1  
AT1G61110.1  
AT5G63790.1,AT5G08790.1  
AT3G56530.1  
AT1G19040.1,AT1G03490.1  
AT2G17040.1  
AT5G64530.1  
AT2G43000.1,AT5G39820.1  
AT5G14000.1  
AT4G17980.1,AT1G32510.1,AT3G10500.1,AT1G33060.2,AT5G04410.1  
AT1G32870.1,AT3G10490.2,AT5G09330.1,AT3G10480.1,AT1G34190.1,AT1G34180.1,AT5G64060.1  
AT3G44290.1,AT5G24590.2,AT4G35580.1  
AT4G01540.1,AT3G18400.1,AT4G01520.1  
AT3G04420.1  
AT4G28530.1,AT1G56010.2,AT1G76420.1,AT2G24430.1  
AT5G39610.1,AT5G18270.1,AT3G04060.1,AT5G07680.1,AT3G29035.1  
AT3G04430.1  
AT2G27300.1  
AT3G44350.1,AT5G22380.1  
Phypa1|33722,Phypa1|2349,Phypa1|2350,Phypa1|15582  
Phypa1|2167,Phypa1|2220  
Phypa1|2162  
Phypa1|29685,Phypa1|29512,Phypa1|28513,Phypa1|28437  
AT5G45680.1 Phypa1|30216  
AT5G48580.1,AT3G25220.1 Phypa1|30370,Phypa1|2189,Phypa1|17045  
AT5G48570.1,AT3G25230.1 Phypa1|27640  
AT5G64350.1 Phypa1|36176  
AT4G39710.1  
AT1G58450.1  
Phypa1|28230  
AT1G18170.1,AT1G73655.1 Phypa1|25091  
Phypa1|8702  
AT3G02060.1 Phypa1|38648  
Phypa1|18569  
Phypa1|22042  
AT3G11540.1 Phypa1|38124,Phypa1|30213  
AT1G29900.1 Phypa1|31063,Phypa1|30202,Phypa1|36446,Phypa1|3064  
AT5G48230.2,AT5G47720.2 Phypa1|39192  
Phypa1|31520  
Phypa1|32761  
AT3G15690.2,AT1G52670.1 Phypa1|34555,Phypa1|33126,Phypa1|32754  
AT3G56130.1  
AT1G74370.1,AT1G69330.1,AT3G29270.1 Phypa1|2034,Phypa1|677  
AT3G60670.1,AT2G12646.1 Phypa1|24516,Phypa1|35779,Phypa1|39784,Phypa1|24501  
AT4G17900.1,AT1G32700.1 Phypa1|24341,Phypa1|24682,Phypa1|37228,Phypa1|11891  
AT2G27930.1,AT1G76590.1  
AT1G21000.1,AT1G43000.1  
AT5G46710.1  
Phypa1|25780  
Phypa1|236,Phypa1|700,Phypa1|712,Phypa1|699,Phypa1|16372  
AT1G77180.1 Phypa1|36603  
AT2G16710.1 Phypa1|36322  
AT2G36260.1  
Phypa1|31423  
AT2G05160.1,AT3G52980.1 Phypa1|25613,Phypa1|28103  
AT2G26000.2 Phypa1|36418  
AT2G27160.1,AT2G42160.1  
AT4G04200.1,AT2G39960.1 Phypa1|39725,Phypa1|33690  
AT5G13510.1 Phypa1|37578,Phypa1|36816  
AT3G12370.1  
Phypa1|32596  
Phypa1|22917  
AT1G16690.1,AT1G79020.1 Phypa1|38217  
Phypa1|16038  
AT4G13350.1,AT4G32630.1 Phypa1|32469,Phypa1|34259,Phypa1|33883  
Phypa1|32099,Phypa1|29719  
AT1G32340.1 Phypa1|25027  
AT1G53400.1 Phypa1|13516,Phypa1|35273  
AT1G16960.1  
AT5G45740.1  
Phypa1|29097  
AT5G47970.1,AT3G63510.1 Phypa1|2494,Phypa1|22240  
Phypa1|2392  
AT5G42220.1 Phypa1|34444,Phypa1|32084

AT5G11080.1,AT5G25270.1  
AT5G50920.1,AT3G48870.1 Phypa1|33552,Phypa1|24038,Phypa1|25365,Phypa1|23867  
AT1G74310.1 Phypa1|39556  
AT5G15450.1 Phypa1|26580,Phypa1|37547  
AT5G51070.1 Phypa1|24497,Phypa1|36240  
AT3G45450.1  
AT4G14670.1  
AT2G25140.1  
Phypa1|22837  
Phypa1|3912  
Phypa1|14837  
Phypa1|27283  
AT1G20180.1,AT3G49070.1 Phypa1|6423  
AT1G59660.1,AT1G10390.1,AT1G63540.1 Phypa1|16843,Phypa1|35376  
AT1G63530.1  
AT5G13860.1,AT3G12400.1 Phypa1|36576,Phypa1|34964  
AT2G38830.1  
AT1G14570.1 Phypa1|25743  
AT1G59550.1,AT4G14250.1  
AT3G23605.1  
AT1G03780.2 Phypa1|31924,Phypa1|12084  
AT5G44270.1  
AT3G60030.1,AT2G47070.1 Phypa1|26187  
AT2G47390.1 Phypa1|32871,Phypa1|25004  
Phypa1|39185  
AT1G73010.1,AT1G17710.1,AT4G29530.1 Phypa1|36133  
AT5G24690.1 Phypa1|973,Phypa1|26459,Phypa1|29899  
Phypa1|3035  
AT4G33760.1 Phypa1|24776  
Phypa1|23474  
Phypa1|23661  
AT4G25660.1,AT4G25680.1 Phypa1|656,Phypa1|211,Phypa1|2057  
AT5G23050.1 Phypa1|38081  
AT1G55320.1 Phypa1|39223,Phypa1|30535  
AT3G55620.1 Phypa1|37673,Phypa1|35690  
AT2G39820.1  
AT1G15120.1,AT2G01090.1 Phypa1|24637  
Phypa1|382  
AT1G69640.1,AT1G14290.1 Phypa1|24014  
AT1G16740.1 Phypa1|28340  
Phypa1|31190  
AT5G67370.1 Phypa1|25844  
Phypa1|2037,Phypa1|1525  
AT1G34370.1 Phypa1|1140,Phypa1|1139,Phypa1|705  
AT4G10710.1 Phypa1|30324  
AT4G10670.1  
AT2G20280.1 Phypa1|1024,Phypa1|127  
AT3G59020.2,AT2G31660.1 Phypa1|37589,Phypa1|29617  
AT2G38050.1 Phypa1|33835  
AT3G16260.1,AT1G52160.1 Phypa1|39050  
Phypa1|1067  
AT2G35020.1,AT1G31070.2 Phypa1|27561,Phypa1|38240  
AT4G22330.1 Phypa1|36585,Phypa1|24112,Phypa1|36757,Phypa1|37516  
AT2G01280.1,AT2G45100.1,AT3G09360.1 Phypa1|27879  
AT5G37510.2 Phypa1|34330,Phypa1|38406,Phypa1|6377  
AT3G19720.1 Phypa1|36392,Phypa1|37906,Phypa1|35089  
AT2G37770.2,AT2G37760.1,AT2G37790.1,AT3G53880.1 Phypa1|34987,Phypa1|37295  
AT2G21250.1,AT2G21260.1 Phypa1|38445  
AT5G62420.1  
Phypa1|23711  
Phypa1|26859  
Phypa1|35066  
Phypa1|37703  
Phypa1|30687,Phypa1|23979,Phypa1|21341  
Phypa1|23248  
AT3G11070.1,AT5G05520.1 Phypa1|39545,Phypa1|25185  
AT3G62910.1 Phypa1|28009  
AT2G47020.1 Phypa1|18492  
AT1G70650.1,AT1G48570.1,AT1G55040.1 Phypa1|13437,Phypa1|26660  
AT1G49340.1 Phypa1|36954  
AT1G51040.1  
Phypa1|14818  
AT1G50030.1 Phypa1|35794  
Phypa1|38801  
Phypa1|26274  
AT3G54290.1 Phypa1|32817,Phypa1|24542,Phypa1|26456,Phypa1|34060  
Phypa1|35796,Phypa1|33301,Phypa1|3847,Phypa1|8939  
AT2G04630.1,AT5G51940.1 Phypa1|28870  
AT3G45750.1 Phypa1|1979  
AT2G39740.1 Phypa1|33978  
AT3G45760.1  
AT4G32060.1 Phypa1|26482,Phypa1|30379

AT3G50520.1,AT5G04120.1 Phypa1|26595,Phypa1|16086  
 Phypa1|31256  
 AT5G66010.1 Phypa1|30796  
 AT3G20890.1  
 AT2G18220.1 Phypa1|25208  
 AT3G55510.1  
 AT2G25640.1,AT5G11430.1,AT5G25520.2 Phypa1|17035  
 AT2G35640.1,AT1G31310.1  
 Phypa1|680,Phypa1|35373,Phypa1|683,Phypa1|32187,Phypa1|1129,Phypa1|31526  
 AT3G18770.1,AT3G49590.1 Phypa1|10844,Phypa1|33063  
 AT5G20500.1 Phypa1|39261  
 AT1G77370.1  
 AT4G22310.1,AT4G14695.1 Phypa1|33540  
 AT4G05590.2  
 Phypa1|29604  
 AT1G29150.1 Phypa1|39003,Phypa1|3213  
 AT3G44190.1,AT5G22140.1 Phypa1|10655,Phypa1|24057  
 AT5G05460.1,AT3G11040.1 Phypa1|24973  
 AT1G03130.1,AT4G02770.1 Phypa1|24121,Phypa1|24287,Phypa1|27607,Phypa1|26954  
 AT5G12210.1,AT3G12070.1 Phypa1|37413,Phypa1|36343  
 Phypa1|4110  
 AT4G34640.1,AT4G34650.1 Phypa1|2918,Phypa1|28461  
 Phypa1|32121  
 AT5G19460.1,AT5G19470.1 Phypa1|27296  
 Phypa1|19134,Phypa1|30343  
 AT2G22730.1,AT5G64500.1,AT5G65687.1 Phypa1|33117  
 Phypa1|5743  
 AT5G23720.1 Phypa1|38868  
 AT3G23610.1  
 AT5G15540.1 Phypa1|12028  
 AT1G55620.2 Phypa1|25116  
 AT4G35440.1 Phypa1|28064  
 AT5G58440.1,AT5G07120.1 Phypa1|36809  
 AT5G59710.1,AT1G07705.1 Phypa1|37948,Phypa1|25661,Phypa1|25992  
 AT1G23440.1,AT1G56700.1 Phypa1|2516,Phypa1|3033  
 AT4G02020.1,AT2G23380.1 Phypa1|37011  
 AT1G02580.1  
 AT3G10180.1 Phypa1|25008  
 AT4G14150.1,AT3G23670.1 Phypa1|32198,Phypa1|27265  
 AT1G59540.1 Phypa1|26893,Phypa1|34845  
 AT3G63480.1 Phypa1|28999  
 AT1G72250.1,AT2G22610.1 Phypa1|30537,Phypa1|24802  
 AT3G45850.1,AT2G28620.1 Phypa1|34207,Phypa1|31612,Phypa1|19262,Phypa1|31825  
 AT1G18410.1,AT2G21300.1,AT1G55550.1,AT4G39050.1,AT5G27000.1,AT5G66310.1,AT1G73860.1,AT5G54670.1,AT3G10310.1,AT2G36200.1,AT4G14330.1,AT3G16060.1,AT5G47820.1,AT5G02370.1,AT4G21270.1,AT1G09170.1,AT5G27950.1,AT2G47500.1,AT3G44050.1,AT2G21380.1,AT5G65930.2,AT3G17360.1,AT1G01950.1,AT5G23910.1,AT3G43210.1,AT3G44730.1,AT1G21730.1,AT4G24170.1,AT2G37420.1,AT5G41310.1,AT5G06670.1,AT4G38950.1,AT3G50240.1,AT5G60930.1,AT1G63640.2,AT1G12430.1,AT4G27180.1,AT1G18550.1,AT3G19050.1,AT5G27550.1,AT3G12020.1,AT4G05190.1,AT1G18370.1,AT3G49650.1,AT3G54870.1,AT3G51150.1  
 Phypa1|406,Phypa1|1750,Phypa1|35566,Phypa1|19503,Phypa1|27269,Phypa1|34608,Phypa1|11667,Phypa1|25385,Phypa1|402,Phypa1|101,Phypa1|25015,Phypa1|19941,Phypa1|26483,Phypa1|32087,Phypa1|29314,Phypa1|27000,Phypa1|38763,Phypa1|25720,Phypa1|27121,Phypa1|17571,Phypa1|34929,Phypa1|28269,Phypa1|28455,Phypa1|947,Phypa1|29424,Phypa1|17,Phypa1|29788,Phypa1|27489,Phypa1|33455,Phypa1|27029,Phypa1|27193,Phypa1|29461,Phypa1|30236,Phypa1|26553,Phypa1|25336,Phypa1|9521,Phypa1|26792,Phypa1|7749,Phypa1|28408,Phypa1|27415,Phypa1|27904,Phypa1|25938,Phypa1|24408,Phypa1|30205,Phypa1|29696,Phypa1|27028,Phypa1|24417,Phypa1|24729  
 AT5G55520.1,AT4G26660.1,AT3G20150.1  
 AT1G20060.1  
 AT5G33300.1  
 AT5G42490.1  
 Phypa1|4739  
 Phypa1|26853,Phypa1|29527,Phypa1|26856,Phypa1|26137,Phypa1|2615,Phypa1|26366,Phypa1|28163,Phypa1|24456,Phypa1|27582,Phypa1|29666,Phypa1|26027  
 Phypa1|1238  
 Phypa1|26658  
 Phypa1|7770  
 Phypa1|10750  
 Phypa1|28559,Phypa1|1615  
 Phypa1|1623  
 Phypa1|17488  
 Phypa1|12131  
 Phypa1|26332  
 Phypa1|25094  
 Phypa1|25835  
 AT1G66340.1 Phypa1|37472,Phypa1|38622,Phypa1|35916,Phypa1|4904  
 AT2G40940.1  
 Phypa1|37107,Phypa1|27753  
 Phypa1|23413,Phypa1|37572,Phypa1|21483,Phypa1|22941,Phypa1|26633,Phypa1|27716,Phypa1|20602,Phypa1|2275  
 Phypa1|1362,Phypa1|2563  
 Phypa1|38541,Phypa1|9623,Phypa1|28849,Phypa1|37216  
 Phypa1|21314

AT3G56740.1,AT2G41160.1 Phypa1|37044,Phypa1|36827  
Phypa1|4024  
AT1G30680.1 Phypa1|37373  
AT1G30660.1  
Phypa1|5555  
Phypa1|17375  
AT3G57290.1 Phypa1|38752,Phypa1|23692,Phypa1|38028  
AT2G34750.1,AT1G30590.1,AT2G39240.1 Phypa1|28047,Phypa1|28758  
AT1G43710.1 Phypa1|38239,Phypa1|38579  
AT2G35610.1 Phypa1|26160  
AT4G23100.1 Phypa1|6358,Phypa1|35841  
Phypa1|29372  
AT1G26300.1,AT1G69030.1 Phypa1|28452,Phypa1|36752  
AT3G24820.1  
AT4G28070.2,AT4G30490.1 Phypa1|24903,Phypa1|24487  
Phypa1|68  
AT3G27020.1,AT5G41000.1 Phypa1|25918,Phypa1|24412  
AT1G65730.1,AT1G48370.1,AT3G17650.1  
AT5G45450.1  
AT5G24380.1,AT5G53550.1,AT4G24120.1  
Phypa1|10323  
AT1G21312.1,AT1G76940.1 Phypa1|786  
AT1G18270.1 Phypa1|37262  
Phypa1|31311,Phypa1|30422,Phypa1|22561  
AT3G53180.1 Phypa1|38016,Phypa1|39760,Phypa1|25727,Phypa1|37410  
Phypa1|30910,Phypa1|22060  
Phypa1|4035  
AT1G55520.1,AT3G13445.1 Phypa1|39436,Phypa1|24939  
AT1G78900.1 Phypa1|38548,Phypa1|38207,Phypa1|24820  
AT1G16820.1  
AT1G26160.1,AT2G23820.2 Phypa1|39525,Phypa1|25690  
AT1G31180.1,AT1G80560.1,AT5G14200.1 Phypa1|24932  
Phypa1|31188  
AT5G37830.1 Phypa1|35826  
AT2G07050.1 Phypa1|38451  
AT1G78500.1,AT1G78950.1,AT1G78960.1,AT1G78970.1,AT5G42600.1,AT4G15340.1,AT5G48010.1,AT1G66960.1,A  
T4G15370.1,AT1G78955.1,AT5G36150.1  
AT3G45130.1  
AT1G78480.1  
AT2G14110.1 Phypa1|2560  
AT3G55800.1 Phypa1|26015,Phypa1|38107  
Phypa1|8625  
AT3G18380.2 Phypa1|26100  
AT1G15215.3  
AT3G56640.1 Phypa1|26374,Phypa1|39134  
AT4G02350.1  
AT4G26430.1,AT5G56280.1 Phypa1|36344  
Phypa1|594  
AT5G42000.1,AT1G01230.1 Phypa1|27891  
AT2G38920.1 Phypa1|4038,Phypa1|27515,Phypa1|36541  
AT1G02860.1  
AT2G46220.1 Phypa1|225,Phypa1|29263  
AT1G79510.1,AT1G16320.1  
AT5G40820.1 Phypa1|26949  
AT5G41220.1,AT5G41210.1,AT5G41240.1 Phypa1|39400  
Phypa1|216,Phypa1|676  
AT2G22770.1,AT2G22750.1,AT2G22760.1,AT4G37850.1 Phypa1|32676,Phypa1|32359  
AT5G46830.1,AT4G17880.1,AT5G46760.1,AT1G32640.1 Phypa1|24890  
AT2G46510.1,AT1G01260.1,AT4G16430.1  
Phypa1|33338,Phypa1|33336,Phypa1|31601  
Phypa1|2203  
AT5G50330.1,AT4G24810.2 Phypa1|24588  
AT5G22300.1 Phypa1|15024  
AT3G44310.1,AT3G44300.1,AT3G44320.1  
AT5G12040.1 Phypa1|27059,Phypa1|38348  
Phypa1|30431,Phypa1|31193  
Phypa1|20874  
AT1G22520.1,AT1G72170.1 Phypa1|1286,Phypa1|2204,Phypa1|32934  
AT3G49420.1,AT3G03180.1,AT5G01430.1 Phypa1|37062  
AT1G05785.1  
AT5G46030.1 Phypa1|38771,Phypa1|24163  
AT5G57590.1 Phypa1|38726  
AT5G57600.1  
AT3G09820.1,AT5G03300.1 Phypa1|36792,Phypa1|2509  
Phypa1|20926  
AT2G22240.1,AT4G39800.1,AT5G10170.1 Phypa1|39481,Phypa1|38629  
AT1G55880.1 Phypa1|37510  
AT3G59760.1,AT2G43750.1 Phypa1|33318,Phypa1|25171  
AT4G14880.1  
AT3G22460.1  
AT5G28020.1,AT3G04940.1,AT5G28030.1  
AT3G61440.1

AT3G03630.1  
     Phypa1|38025  
     Phypa1|30873,Phypa1|22616  
     Phypa1|38937  
     Phypa1|24751  
 AT5G17530.1           Phypa1|14376  
 AT1G70820.1  
 AT5G09300.1,AT1G21400.1       Phypa1|39338  
 AT5G34780.1  
     Phypa1|30897,Phypa1|3008  
     Phypa1|31230  
 AT3G28760.2           Phypa1|38863,Phypa1|36965,Phypa1|37686  
     Phypa1|29380,Phypa1|31003,Phypa1|29713  
 AT3G01015.1,AT5G15510.1       Phypa1|33184  
 AT4G38640.1           Phypa1|37871  
     Phypa1|25183  
 AT3G55330.1           Phypa1|25571  
 AT2G39470.1  
 AT3G12130.1,AT5G06770.1       Phypa1|36644,Phypa1|26684  
 AT3G03750.2           Phypa1|24499  
 AT5G04940.1,AT2G22740.1,AT2G35160.1,AT5G47160.1,AT5G47150.1       Phypa1|31573,Phypa1|36005  
 AT5G13960.1           Phypa1|1365,Phypa1|34504  
 AT1G73100.1,AT2G24740.1,AT1G17770.1  
 AT4G13460.1,AT2G33290.1  
 AT2G05900.1  
     Phypa1|32331  
     Phypa1|39743  
 AT2G38560.1           Phypa1|37397,Phypa1|27661  
     Phypa1|25810  
 AT4G32530.1,AT2G25610.1       Phypa1|32488,Phypa1|37129,Phypa1|27369,Phypa1|37304  
 AT4G26780.1,AT5G55200.1       Phypa1|24201  
     Phypa1|39281  
 AT1G19110.1,AT1G72500.1       Phypa1|26365,Phypa1|11967,Phypa1|27957  
 AT2G16950.1           Phypa1|36110,Phypa1|39506,Phypa1|38252,Phypa1|32647  
 AT2G16960.1  
 AT5G57960.1           Phypa1|28302  
     Phypa1|30915  
 AT4G30950.1           Phypa1|39438  
     Phypa1|11349,Phypa1|26688,Phypa1|27056  
     Phypa1|31467  
 AT3G61530.1,AT2G46110.1       Phypa1|574  
     Phypa1|30598  
 AT4G16800.1           Phypa1|28876  
 AT5G43280.1           Phypa1|39056  
 AT3G15290.1           Phypa1|24896  
 AT3G06860.1           Phypa1|39209,Phypa1|26923  
 AT4G29010.1  
     Phypa1|30818  
     Phypa1|28920,Phypa1|30809  
     Phypa1|30004  
     Phypa1|30484  
     Phypa1|21763,Phypa1|30757  
     Phypa1|30815  
     Phypa1|30506  
     Phypa1|31242  
     Phypa1|21974  
 AT1G16170.1,AT1G79660.1       Phypa1|33296,Phypa1|33881  
 AT5G41370.1,AT5G41360.1       Phypa1|34404  
     Phypa1|22974,Phypa1|31255  
 AT2G02560.1           Phypa1|19723,Phypa1|38483  
     Phypa1|6237  
 AT5G45600.1           Phypa1|26155,Phypa1|30334  
 AT2G18000.1  
 AT1G67370.1           Phypa1|26022  
 AT1G65260.1           Phypa1|25300,Phypa1|26921  
     Phypa1|22009,Phypa1|30059  
 AT5G24130.1           Phypa1|30206  
     Phypa1|8809  
 AT4G16340.1           Phypa1|26532,Phypa1|36219,Phypa1|26524,Phypa1|28253,Phypa1|37945,Phypa1|35305  
 AT1G78460.1,AT1G78450.1,AT1G17100.1       Phypa1|26527,Phypa1|28432  
 AT3G58520.1,AT1G71850.1,AT4G24320.1,AT5G48040.1,AT2G39120.1  
     Phypa1|22937,Phypa1|1030,Phypa1|28300,Phypa1|1856  
 AT3G63090.1,AT2G31290.1  
 AT1G06440.1,AT4G33495.1,AT5G45790.1  
 AT4G08940.1  
 AT5G21970.1  
 AT5G62990.1  
 AT5G55810.1           Phypa1|24597,Phypa1|30112,Phypa1|30989,Phypa1|17549  
 AT3G11530.2           Phypa1|34403,Phypa1|39131  
 AT1G32410.1  
 AT1G30825.1           Phypa1|29423,Phypa1|25748  
 AT2G33385.1

AT1G30630.1,AT2G34840.1 Phypa1|38617,Phypa1|34574,Phypa1|36075  
 AT1G48520.1 Phypa1|39623  
     Phypa1|5433  
     Phypa1|30464  
     Phypa1|35400  
 AT1G45230.1,AT3G46630.1 Phypa1|25653,Phypa1|35969  
 AT4G20040.1,AT4G20050.1 Phypa1|39682,Phypa1|37933  
 AT2G25740.1 Phypa1|1821,Phypa1|27237,Phypa1|29108,Phypa1|28712,Phypa1|1802  
     Phypa1|16752  
 AT3G23890.1 Phypa1|27650,Phypa1|25699  
 AT2G13720.1  
 AT2G17230.1 Phypa1|38870,Phypa1|27575,Phypa1|27902  
 AT4G08950.1,AT5G09440.1,AT1G35140.1,AT5G64260.1 Phypa1|2655,Phypa1|28739,Phypa1|24627,Phypa1|24978  
 AT2G35150.1,AT5G51550.1  
 AT3G02970.1  
     Phypa1|1990,Phypa1|1470,Phypa1|1486,Phypa1|25765,Phypa1|1487,Phypa1|2940,Phypa1|1978,Phypa1|30801  
     Phypa1|1494  
 AT1G79690.1 Phypa1|18018  
 AT2G38710.1 Phypa1|32809  
     Phypa1|22840  
 AT4G09150.1,AT1G22930.1 Phypa1|27644,Phypa1|37069  
 AT5G36210.1 Phypa1|37284  
     Phypa1|7337  
     Phypa1|7336  
     Phypa1|7335  
     Phypa1|31709  
 AT5G18410.1 Phypa1|24721,Phypa1|35780  
 AT2G16060.1,AT3G10520.1 Phypa1|39792,Phypa1|36768  
 AT2G15290.1 Phypa1|26481,Phypa1|2011,Phypa1|26375  
 AT1G23170.1,AT1G70770.1,AT3G11880.1 Phypa1|32683,Phypa1|33913  
 AT5G51590.1,AT4G00200.1,AT4G25320.1,AT4G12080.1,AT5G62260.1,AT4G22770.1  
     Phypa1|31756,Phypa1|32491,Phypa1|35821,Phypa1|15884,Phypa1|2047,Phypa1|16396,Phypa1|34821  
 AT3G61310.1,AT1G63470.1,AT2G45850.1,AT1G63480.1  
 AT4G17950.1,AT5G46640.1,AT2G33620.1  
 AT5G28590.1,AT3G04590.2  
 AT2G36560.1  
 AT2G43240.1,AT3G59360.1 Phypa1|2965,Phypa1|38891  
 AT2G32520.1 Phypa1|4968  
 AT2G36300.1,AT3G52760.1 Phypa1|35943,Phypa1|24885,Phypa1|32224  
 AT2G27900.1 Phypa1|33822,Phypa1|30526,Phypa1|33538  
 AT1G50920.1,AT1G10300.1 Phypa1|36000,Phypa1|36510  
 AT3G23860.1  
 AT3G43240.1 Phypa1|15,Phypa1|26354  
 AT1G02475.1,AT4G01883.1,AT1G02470.1 Phypa1|36271,Phypa1|29101  
     Phypa1|16448  
 AT4G24830.1 Phypa1|19989  
     Phypa1|31173  
     Phypa1|17683  
 AT1G57770.1 Phypa1|32474  
     Phypa1|38181  
 AT2G20360.1 Phypa1|23749,Phypa1|33399  
 AT5G05280.1,AT2G17450.1,AT1G49220.1,AT1G49210.1,AT1G49200.1,AT1G49230.1,AT3G18773.1,AT1G76410.1,AT1G20823.1,AT5G01880.1,AT3G10910.1 Phypa1|746,Phypa1|37509  
 AT2G46160.1,AT3G61550.1 Phypa1|36078,Phypa1|23787  
 AT4G09110.1,AT4G17920.1,AT4G40070.1,AT3G05200.1,AT5G27420.1,AT1G72200.1,AT1G35330.1,AT2G35000.1,AT4G09130.1,AT4G09120.1,AT1G22500.1,AT2G34990.1 Phypa1|16721,Phypa1|1298,Phypa1|2143,Phypa1|32040  
 AT4G35480.1  
 AT1G53010.1  
 AT2G18670.1  
 AT4G35840.1  
 AT2G34000.1  
 AT4G17245.1,AT5G47610.1  
 AT3G11110.1  
 AT5G20885.1  
 AT5G06490.1,AT2G35910.1  
 AT2G37580.1  
 AT5G66070.2,AT2G17730.1  
 AT5G07040.1  
 AT1G24580.1,AT5G43420.1  
 AT5G41450.1,AT5G41440.1  
 AT4G10150.1,AT4G10160.1  
 AT2G27940.1  
 AT4G11370.1,AT3G43430.1  
 AT2G35420.1  
 AT3G18930.1  
     Phypa1|19225,Phypa1|31875  
     Phypa1|1296,Phypa1|314  
     Phypa1|27530,Phypa1|28065  
 AT3G53800.1,AT3G09350.1,AT5G02150.1 Phypa1|37363,Phypa1|2722  
 AT4G25433.1,AT5G62150.1,AT3G52790.1 Phypa1|853  
 AT2G15130.1,AT2G15220.1,AT2G15170.1 Phypa1|37364

AT5G50200.1,AT4G24720.1 Phypa1|38287,Phypa1|39075,Phypa1|33685  
AT4G23620.1 Phypa1|2038  
AT5G66860.1  
AT1G06570.1 Phypa1|38330,Phypa1|36289  
Phypa1|30504,Phypa1|21311  
AT1G12600.1,AT4G23010.1 Phypa1|26861  
AT2G02810.1,AT1G14360.1 Phypa1|25589  
Phypa1|26555,Phypa1|30645  
Phypa1|7928  
AT3G46180.1,AT5G59740.1 Phypa1|23853  
Phypa1|34722  
AT5G35525.1,AT1G14880.1,AT1G68610.1,AT1G14870.1 Phypa1|24357  
AT1G52200.1,AT3G18450.1  
Phypa1|37517,Phypa1|36357  
Phypa1|37953  
AT1G16350.1,AT1G79470.1 Phypa1|38407,Phypa1|39487  
Phypa1|30455  
AT1G73990.1 Phypa1|917  
Phypa1|21979  
AT5G63890.2 Phypa1|29271,Phypa1|31913  
Phypa1|31429,Phypa1|31314  
AT3G07220.1,AT3G07260.1 Phypa1|7870,Phypa1|38214,Phypa1|38756,Phypa1|23715  
AT4G21110.1 Phypa1|36203,Phypa1|37286  
AT5G09570.1 Phypa1|34617,Phypa1|30784  
AT5G64400.2  
Phypa1|38469  
AT5G14620.1,AT5G15380.1 Phypa1|29609,Phypa1|27555  
AT3G17310.1  
AT2G03820.1 Phypa1|27469  
Phypa1|5490  
AT2G15620.1 Phypa1|29069,Phypa1|37562  
Phypa1|30741  
AT5G19530.1 Phypa1|38621,Phypa1|39511,Phypa1|36423  
Phypa1|14021  
AT1G48950.1,AT1G17210.1 Phypa1|35352  
AT1G10740.1,AT1G23330.1 Phypa1|36263  
Phypa1|6267  
AT3G11750.1,AT3G21730.1,AT5G62980.1 Phypa1|24063  
AT5G57640.1,AT1G14060.1 Phypa1|27048  
AT5G57570.1  
AT5G02210.1  
AT1G03160.1 Phypa1|29761,Phypa1|37487  
AT2G40600.1 Phypa1|36652,Phypa1|12203  
AT1G71220.1 Phypa1|6008  
AT3G19970.1 Phypa1|1022,Phypa1|516  
AT2G18245.1  
AT3G03080.1,AT5G37940.1,AT5G38000.1,AT5G16990.1,AT3G59845.1,AT5G37980.1,AT5G16970.1,AT5G16960.1,AT1G65560.1,AT5G17000.1,AT1G26320.1 Phypa1|36396  
AT5G16980.1  
Phypa1|29590  
AT4G09550.1,AT1G73790.1 Phypa1|28061,Phypa1|38882  
AT1G69740.1 Phypa1|35800,Phypa1|39373  
AT1G44318.1  
Phypa1|3073  
AT1G74790.1,AT5G39970.1,AT5G62630.1 Phypa1|37098,Phypa1|1780  
Phypa1|22287  
AT5G40810.1,AT3G27240.1 Phypa1|26579,Phypa1|24451,Phypa1|36663  
Phypa1|2717  
AT4G19460.1 Phypa1|27761,Phypa1|34884  
AT1G73160.1  
AT5G59070.1  
AT5G43600.1 Phypa1|32276  
Phypa1|30479,Phypa1|30767,Phypa1|31408,Phypa1|30607  
Phypa1|30486  
AT3G48110.1 Phypa1|35269  
Phypa1|22139  
AT5G13630.1 Phypa1|19906,Phypa1|39625  
AT3G23760.1,AT4G14100.1 Phypa1|36941  
AT5G57580.1,AT2G18750.1,AT4G25800.1  
Phypa1|27139,Phypa1|1775,Phypa1|27421,Phypa1|1781,Phypa1|37978,Phypa1|36535  
AT1G73805.1  
AT1G73800.1  
AT2G24300.2,AT4G31000.1  
AT5G62570.1  
AT5G26920.1  
AT2G34690.1 Phypa1|39349  
AT4G39670.1  
AT3G02910.1 Phypa1|30404,Phypa1|30188,Phypa1|25444,Phypa1|28441,Phypa1|28390  
AT5G46720.1  
AT1G27330.1,AT1G27350.1 Phypa1|24937,Phypa1|38387  
AT4G24040.1 Phypa1|28859,Phypa1|28831,Phypa1|27780,Phypa1|39101  
AT3G13410.1 Phypa1|32061,Phypa1|33398



AT1G03475.1 Phypa1|24129,Phypa1|39522  
AT4G03205.2 Phypa1|27090  
AT4G37280.1 Phypa1|25945,Phypa1|30552  
AT1G02740.1  
AT5G19900.1 Phypa1|7168,Phypa1|35609,Phypa1|32925  
Phypa1|16885  
AT1G72680.1 Phypa1|33499  
AT2G21730.1,AT4G37970.1,AT2G21890.1,AT4G37990.1,AT4G37980.1,AT4G39330.1 Phypa1|14872  
AT4G34230.1,AT3G19450.1  
Phypa1|27937  
AT4G35080.1,AT2G16800.1 Phypa1|24668,Phypa1|26329,Phypa1|1107,Phypa1|27529  
Phypa1|28536  
AT4G32470.1,AT5G25450.1 Phypa1|37647,Phypa1|36074  
Phypa1|30064  
AT2G06520.1 Phypa1|35003,Phypa1|32338,Phypa1|33829,Phypa1|35326  
AT5G18420.2 Phypa1|34289,Phypa1|36783,Phypa1|33450  
AT1G54310.2 Phypa1|39591  
Phypa1|31253  
AT4G14746.1 Phypa1|8572  
ATMG01360.1 Phypa1|30468,Phypa1|31382  
Phypa1|31219  
Phypa1|17713  
Phypa1|22172  
AT5G42420.1,AT1G21070.1,AT1G76670.1  
Phypa1|26379,Phypa1|26005,Phypa1|12673,Phypa1|25073,Phypa1|25058,Phypa1|26392  
AT1G06890.1 Phypa1|27897,Phypa1|29912  
AT4G39390.1,AT4G09810.1,AT1G34020.1  
AT5G55950.1,AT5G57100.1  
AT2G28315.1  
AT2G30460.1  
AT2G18180.1,AT1G75370.1,AT4G34580.1,AT2G16380.1,AT5G56160.1,AT4G36490.1,AT2G21520.1,AT3G24840.1,A  
T1G55690.1,AT4G39170.1,AT2G21540.1,AT1G19650.1,AT4G39180.1 Phypa1|28574,Phypa1|27205,Phypa1|29883  
AT5G47510.1  
Phypa1|37004,Phypa1|25380  
Phypa1|26201  
AT1G51510.1 Phypa1|28106,Phypa1|25607  
AT2G37400.1,AT3G09490.1,AT3G53560.1,AT5G02590.1,AT3G18420.1 Phypa1|25318  
AT3G13740.1,AT1G55140.1 Phypa1|25816  
AT3G02460.1,AT5G15930.1 Phypa1|25102,Phypa1|37791  
AT1G30300.1 Phypa1|28166  
AT4G03610.1  
AT3G58640.1,AT2G31010.1 Phypa1|36799,Phypa1|26617,Phypa1|4493  
AT2G42640.1  
AT5G36140.1,AT5G36110.1 Phypa1|25145  
AT5G36130.1  
AT3G05290.1,AT5G27520.1 Phypa1|23882,Phypa1|38342,Phypa1|33517,Phypa1|23860  
AT4G36050.2 Phypa1|19221  
Phypa1|32181  
AT5G42390.1 Phypa1|29353  
Phypa1|34758  
AT4G23800.1,AT4G11080.1 Phypa1|2496,Phypa1|38665  
AT5G61460.1,AT5G07660.1 Phypa1|38670  
AT2G25320.1 Phypa1|37137  
AT2G25330.1  
AT2G35990.1,AT5G11950.1,AT5G06300.1,AT3G53450.1,AT2G37210.1,AT4G35190.1,AT2G28305.1  
Phypa1|32966,Phypa1|29163,Phypa1|27304,Phypa1|36504,Phypa1|27786,Phypa1|17030,Phypa1|24953  
AT5G03270.1  
AT5G26140.1  
Phypa1|19099  
Phypa1|1568,Phypa1|27793  
AT4G02850.1,AT4G02860.1,AT1G03210.1 Phypa1|28595,Phypa1|1084  
Phypa1|25493  
AT1G49040.1 Phypa1|3989  
AT4G35280.1,AT2G17180.1 Phypa1|647,Phypa1|197  
AT1G02040.1  
AT2G40650.1 Phypa1|25521  
AT3G50670.1 Phypa1|26046,Phypa1|30122  
AT1G73150.1,AT1G17790.1,AT1G06230.1 Phypa1|26775  
AT3G52280.1,AT2G34900.1 Phypa1|30238,Phypa1|24531,Phypa1|31794  
AT3G01770.1,AT5G63330.1,AT5G14270.1  
AT3G27260.1  
AT5G46550.1  
Phypa1|4681  
AT3G23900.1 Phypa1|4197,Phypa1|31991  
AT3G57150.1 Phypa1|24037,Phypa1|37770  
AT5G14780.1 Phypa1|38940  
Phypa1|30779  
AT1G28340.1 Phypa1|24651  
AT1G25570.1  
Phypa1|31908,Phypa1|38362  
AT5G57410.1,AT2G18876.1 Phypa1|25366,Phypa1|26183,Phypa1|38873,Phypa1|37317

Phypa1|16274  
Phypa1|27586  
Phypa1|8380  
AT3G20970.1,AT1G51390.1 Phypa1|30140  
Phypa1|24077  
AT5G66540.1 Phypa1|27525  
AT1G07930.1,AT5G60390.1,AT1G07920.1,AT1G07940.1  
Phypa1|38656,Phypa1|35988,Phypa1|9097,Phypa1|23680,Phypa1|38838,Phypa1|31655,Phypa1|31657,P  
hypa1|36629,Phypa1|33066  
AT1G18070.1 Phypa1|26373  
AT5G10630.1 Phypa1|17200  
AT1G35550.1  
Phypa1|35080  
Phypa1|36631  
Phypa1|34869  
AT5G55710.1 Phypa1|1163  
AT2G47840.1  
AT1G04950.1 Phypa1|2650  
AT1G54360.4  
AT5G27290.1 Phypa1|1962  
AT1G54680.1  
AT3G07370.1 Phypa1|37755,Phypa1|30175  
AT3G54010.1 Phypa1|36945  
AT1G77800.1 Phypa1|1193  
AT1G63210.1,AT1G65440.1 Phypa1|25344,Phypa1|25361  
AT1G11475.1 Phypa1|38967  
AT1G61700.1  
AT1G62350.1,AT3G46870.1 Phypa1|34557  
AT2G35720.1 Phypa1|23740,Phypa1|37391  
Phypa1|34216  
AT4G11680.1,AT1G12760.1,AT1G63170.1 Phypa1|39685,Phypa1|1043  
AT3G55530.1 Phypa1|36934,Phypa1|33926  
AT2G01735.1,AT1G68070.1  
AT3G61180.1  
AT3G51325.1  
AT1G15740.1 Phypa1|38476,Phypa1|2985  
AT1G80400.1,AT4G32600.1 Phypa1|1902,Phypa1|1900  
AT3G23790.1,AT4G14070.1 Phypa1|34806,Phypa1|28629  
Phypa1|16691  
AT2G24580.1 Phypa1|37635  
Phypa1|22944,Phypa1|20526  
AT2G36590.1,AT3G55740.1,AT2G39890.1 Phypa1|39306,Phypa1|28053  
AT1G47670.1 Phypa1|26950  
AT1G24400.1,AT1G67640.1,AT5G40780.1,AT1G48640.1 Phypa1|24603,Phypa1|27578  
AT5G41800.1 Phypa1|2706,Phypa1|37156,Phypa1|30661  
AT4G35180.1  
AT3G01760.1,AT1G61270.1  
AT1G71680.1,AT1G25530.1  
AT1G08233.1  
AT1G08230.1  
Phypa1|36834  
AT1G04510.1,AT2G33340.1 Phypa1|36693,Phypa1|38256  
Phypa1|4965  
AT4G03020.1 Phypa1|36646,Phypa1|26305,Phypa1|30165  
AT2G38460.1,AT5G03570.1 Phypa1|24796  
AT5G02780.1,AT5G02790.1,AT3G55040.1 Phypa1|2050  
AT1G54350.1 Phypa1|29106,Phypa1|27719  
Phypa1|27108,Phypa1|38493  
AT5G55300.1,AT5G55310.1 Phypa1|28475,Phypa1|23952  
Phypa1|14648  
AT5G61700.1,AT5G61730.1,AT3G47770.1,AT5G61690.1,AT3G47740.1,AT3G47760.1,AT3G47750.1,AT2G41700.1,A  
T3G47780.1,AT5G61740.1,AT3G47730.1,AT3G47790.1  
Phypa1|29279,Phypa1|36472,Phypa1|37349,Phypa1|29569,Phypa1|39369,Phypa1|37302  
Phypa1|22818,Phypa1|22049,Phypa1|20557,Phypa1|21948,Phypa1|30909,Phypa1|31254  
Phypa1|30604,Phypa1|30732,Phypa1|23312,Phypa1|31031  
Phypa1|31220,Phypa1|30025  
AT1G23010.1,AT1G71040.1 Phypa1|30988,Phypa1|25999  
AT5G63960.1 Phypa1|8731  
Phypa1|33194  
Phypa1|31858  
AT4G18940.1,AT4G18930.1 Phypa1|257,Phypa1|29662  
AT4G34340.1 Phypa1|599  
AT3G02160.1,AT5G15570.1  
AT5G16880.1 Phypa1|38422,Phypa1|37778  
AT1G06210.1  
AT4G11970.1 Phypa1|33145  
AT1G30460.1 Phypa1|31722  
AT2G32080.1 Phypa1|6138,Phypa1|36364  
AT2G37550.1,AT3G53710.1 Phypa1|38598,Phypa1|34131  
AT2G28000.1 Phypa1|27725,Phypa1|25147  
AT3G23990.1,AT2G33210.1 Phypa1|39664,Phypa1|2623,Phypa1|32917,Phypa1|37343  
AT5G56500.2,AT1G55490.1,AT3G13470.1 Phypa1|25009,Phypa1|36109,Phypa1|24233

AT5G18820.1  
AT3G13860.1  
AT1G26230.1  
Phypa1|37444  
AT5G46750.1,AT2G35210.1,AT4G17890.1 Phypa1|26092,Phypa1|94  
AT5G08190.1,AT5G23090.1 Phypa1|39531,Phypa1|28717  
AT1G11860.1 Phypa1|27282,Phypa1|4759  
Phypa1|22228  
AT4G12130.1 Phypa1|27134,Phypa1|37607  
AT3G07860.1 Phypa1|29681,Phypa1|38959,Phypa1|24495  
AT5G25340.1,AT1G80060.1  
AT3G07590.1,AT4G02840.1 Phypa1|37113,Phypa1|36380  
Phypa1|31196  
AT5G56030.1,AT5G56000.1,AT5G56010.1  
Phypa1|39378,Phypa1|24011,Phypa1|36868,Phypa1|39540,Phypa1|29492  
AT2G04030.1 Phypa1|18243,Phypa1|39018  
AT4G24190.1 Phypa1|39049  
AT5G52640.1  
AT3G07770.1  
Phypa1|31011  
Phypa1|14865  
Phypa1|36163  
Phypa1|4206  
Phypa1|4183  
Phypa1|5632  
AT4G17570.1,AT5G47140.1 Phypa1|33902,Phypa1|35707  
Phypa1|31720  
AT1G79880.1,AT4G32720.1 Phypa1|39219  
AT3G56570.1 Phypa1|25785  
AT1G76080.1 Phypa1|1483  
AT4G27040.1 Phypa1|13912  
AT3G31960.1  
AT3G08020.1,AT3G52100.1 Phypa1|34456  
Phypa1|31699  
Phypa1|34455  
AT1G21780.1,AT1G55760.1 Phypa1|27120  
Phypa1|9467,Phypa1|17501  
Phypa1|4277  
AT5G13550.1,AT3G12520.1 Phypa1|38613  
AT4G08620.1,AT1G78000.1,AT1G22150.1 Phypa1|3593,Phypa1|36461,Phypa1|4602,Phypa1|25316  
AT5G19600.1,AT1G23090.1,AT3G51895.1,AT3G15990.1,AT4G02700.1  
AT5G10180.1,AT1G77990.1  
Phypa1|21578  
AT2G41370.1,AT3G57130.1 Phypa1|25852,Phypa1|90,Phypa1|25509  
AT4G31300.2 Phypa1|24496  
AT4G02195.1,AT3G05710.2,AT5G26980.1 Phypa1|34832,Phypa1|25559  
AT1G17145.1,AT1G78420.1 Phypa1|35435  
Phypa1|25673,Phypa1|37381  
AT4G14440.1,AT4G14430.1,AT1G65520.1 Phypa1|29771  
Phypa1|1138  
AT3G18000.1,AT1G73600.1,AT1G48600.2 Phypa1|33103  
Phypa1|12223  
AT3G63410.1 Phypa1|26207,Phypa1|1457  
AT5G10720.1 Phypa1|35986,Phypa1|37449,Phypa1|36387  
AT5G10680.1  
Phypa1|31493,Phypa1|32434  
AT5G46210.1 Phypa1|26796,Phypa1|37590  
AT1G26830.1 Phypa1|23757,Phypa1|29908  
AT4G02570.1 Phypa1|23965,Phypa1|34094,Phypa1|37473  
AT3G46910.1,AT4G12100.1  
AT1G69670.1  
AT1G59800.1,AT1G59790.1  
AT1G02980.1  
Phypa1|23943  
Phypa1|13997  
Phypa1|11466  
AT1G05370.1,AT3G22410.1 Phypa1|33555,Phypa1|9076,Phypa1|10639,Phypa1|19135  
Phypa1|10638  
AT1G65540.1,AT3G59820.2 Phypa1|37160  
Phypa1|28398  
AT5G13410.1 Phypa1|29811,Phypa1|25084  
AT3G23940.1 Phypa1|23921  
Phypa1|23121,Phypa1|3061  
AT2G23370.1,AT4G34090.1 Phypa1|39125,Phypa1|29128  
AT1G18460.1,AT1G73920.1 Phypa1|36015,Phypa1|36171,Phypa1|37626,Phypa1|34465  
AT4G11820.2 Phypa1|39244,Phypa1|23949  
AT5G51370.2,AT5G51380.1,AT5G07670.1 Phypa1|26470,Phypa1|26988  
AT2G23540.1,AT3G50400.1  
Phypa1|25848,Phypa1|36747,Phypa1|4098,Phypa1|39177,Phypa1|29939,Phypa1|25528,Phypa1|26696  
AT5G40990.1,AT3G14225.1,AT1G53920.1,AT1G53940.1,AT1G53990.1 Phypa1|37274  
AT1G71120.1 Phypa1|29055,Phypa1|28713  
AT3G53100.1,AT5G22810.1,AT5G03820.1,AT3G16370.1,AT5G03810.1

Phypa1|2920,Phypa1|2544,Phypa1|28826  
AT5G03600.1,AT5G03610.1,AT3G09930.1 Phypa1|29711  
AT5G33370.1,AT3G04290.1,AT5G18430.1,AT4G28780.1 Phypa1|36728,Phypa1|38458,Phypa1|17446  
AT1G71250.1,AT1G33811.1,AT5G08460.1,AT1G29670.1,AT5G45670.1,AT1G71691.2,AT5G15720.1  
AT5G37690.1,AT1G74460.1  
AT2G03980.1  
AT4G18970.1,AT2G19010.1,AT1G29660.1,AT2G19050.1  
AT2G19060.1,AT4G30140.1,AT5G41890.1  
AT4G16220.1,AT4G16230.1  
AT5G42160.1  
AT4G10950.1  
AT3G14210.1  
AT5G55050.1  
AT1G54020.2,AT1G54000.1,AT1G54010.1,AT1G54030.1,AT3G14220.1  
AT1G73610.1,AT1G20120.1,AT1G75900.1,AT1G23500.1,AT2G31540.1,AT5G45950.1,AT1G06990.1,AT1G58480.1,A  
T3G43550.1,AT2G42990.1,AT3G14820.1,AT2G30220.1,AT1G20130.1,AT1G75930.1,AT5G45960.1,AT1G75890.1,AT  
1G59030.1,AT1G59406.1,AT5G63170.1,AT1G58430.1,AT1G75880.1,AT2G40250.1,AT2G04570.1,AT3G43570.1,AT1  
G75920.1,AT2G30310.1,AT1G75910.1  
AT2G31550.1,AT2G24560.1  
AT5G42170.1,AT1G58725.1  
Phypa1|15524,Phypa1|589  
Phypa1|2600,Phypa1|29871,Phypa1|26312  
Phypa1|24886,Phypa1|9399,Phypa1|28086  
Phypa1|35844,Phypa1|21257,Phypa1|21403,Phypa1|3429,Phypa1|37178,Phypa1|26277  
Phypa1|18502  
AT3G10070.1,AT1G17440.1 Phypa1|1210  
AT5G55900.1,AT4G26620.1 Phypa1|30837,Phypa1|35945  
AT3G27570.1,AT5G40510.1  
AT5G07350.1,AT5G61780.1 Phypa1|37762  
AT1G54840.1 Phypa1|1051  
AT1G54850.1  
AT1G76440.1,AT1G20870.1  
AT2G26890.1 Phypa1|27605,Phypa1|33104  
Phypa1|18900  
AT2G19520.1,AT4G29730.1 Phypa1|16443  
AT1G52155.1 Phypa1|28460,Phypa1|36751,Phypa1|29073,Phypa1|33237,Phypa1|29510,Phypa1|34599  
AT3G44830.1,AT5G13640.1 Phypa1|39607  
AT1G76500.1,AT2G35270.1,AT4G22810.1,AT1G20900.1,AT3G04570.1,AT4G14465.1,AT4G17800.1,AT4G12050.1,A  
T2G45430.1,AT4G35390.1,AT3G60870.1  
Phypa1|1102,Phypa1|1545,Phypa1|653,Phypa1|2045,Phypa1|651,Phypa1|2079  
AT3G55560.1,AT2G42940.1  
AT1G14490.1,AT5G49700.1  
AT5G49930.1 Phypa1|27794  
AT1G71920.1,AT5G10330.1 Phypa1|28661  
Phypa1|30499,Phypa1|31234  
Phypa1|31100  
AT2G44150.1,AT3G59960.1 Phypa1|1454  
AT4G30860.1  
Phypa1|4048  
AT5G11770.1 Phypa1|23900,Phypa1|17043  
Phypa1|31039  
AT4G14910.1,AT3G22425.2 Phypa1|25869  
Phypa1|31315  
AT4G33350.1 Phypa1|10654,Phypa1|35200  
AT3G23710.1  
AT5G61220.1 Phypa1|39376,Phypa1|25928  
AT5G53340.1,AT4G32120.1,AT2G25300.1 Phypa1|27493,Phypa1|28345  
AT2G26100.1,AT1G53290.1,AT3G14960.1 Phypa1|38689,Phypa1|1049  
AT1G32930.1 Phypa1|35358,Phypa1|35084,Phypa1|25023,Phypa1|25734  
AT2G32430.1,AT4G26940.1,AT1G05170.1  
AT1G11730.1  
AT1G22015.1,AT1G77810.1  
AT1G33430.1  
AT5G17660.1 Phypa1|2552,Phypa1|17347  
AT4G27020.1,AT5G54870.1,AT1G70160.1 Phypa1|37537,Phypa1|37916  
AT1G64790.1 Phypa1|31783  
AT4G09650.1 Phypa1|1134,Phypa1|28134,Phypa1|1539  
AT4G14570.1 Phypa1|36977,Phypa1|1364,Phypa1|37065  
Phypa1|19872  
Phypa1|19355  
AT3G08630.1,AT3G08640.1 Phypa1|24445,Phypa1|26938,Phypa1|1080  
Phypa1|1964  
AT2G30920.1 Phypa1|1065  
AT2G33540.1 Phypa1|14362,Phypa1|8340  
AT2G18040.1 Phypa1|24027,Phypa1|32374  
AT2G15560.1 Phypa1|24541,Phypa1|27623,Phypa1|26450,Phypa1|35923  
Phypa1|32764  
AT4G30690.1,AT2G24060.1 Phypa1|35461,Phypa1|34140  
AT5G51290.1 Phypa1|8194,Phypa1|31636  
AT3G08740.1 Phypa1|8338  
Phypa1|31097  
AT1G72590.1,AT2G16530.1 Phypa1|25582

AT3G43840.1  
AT5G16010.1 Phypa1|30185,Phypa1|36563  
AT3G15390.1,AT5G58720.1 Phypa1|33736  
AT1G50320.1 Phypa1|24762,Phypa1|29649  
AT4G03520.1,AT1G03680.1 Phypa1|30094,Phypa1|38942,Phypa1|29980,Phypa1|27592,Phypa1|25345  
AT1G43560.1,AT1G76760.1 Phypa1|24638  
AT3G06730.1 Phypa1|27755,Phypa1|1586  
AT2G15570.1  
AT3G15360.1  
AT4G12170.1  
Phypa1|30588  
Phypa1|29977  
AT4G21660.1 Phypa1|27430,Phypa1|38146  
AT1G11520.1  
AT5G42620.1 Phypa1|27462,Phypa1|32151  
Phypa1|7989  
Phypa1|7991  
AT3G21720.1 Phypa1|37257,Phypa1|28113  
Phypa1|23104  
AT2G27460.1 Phypa1|6434,Phypa1|37668  
Phypa1|16941  
AT3G58660.1,AT1G06380.1,AT2G42650.1 Phypa1|1064,Phypa1|1116  
AT2G02390.3,AT2G02380.1 Phypa1|38017  
AT4G11570.1 Phypa1|27040,Phypa1|1944  
AT2G18740.1,AT4G30330.1 Phypa1|23871,Phypa1|24214,Phypa1|25471  
AT1G12250.1 Phypa1|27148  
Phypa1|35846  
AT5G01780.1,AT3G14160.1 Phypa1|618  
AT3G14140.1  
Phypa1|35062  
AT1G15020.2,AT2G01270.1 Phypa1|37737  
Phypa1|35139,Phypa1|7355  
AT1G63980.1 Phypa1|35806  
Phypa1|32098  
AT1G53560.1,AT1G29970.1,AT3G14595.1,AT1G17080.1 Phypa1|38014,Phypa1|32480  
AT2G26990.1 Phypa1|33922,Phypa1|33572,Phypa1|27572  
AT1G05900.2,AT2G31450.1 Phypa1|26647  
Phypa1|31409,Phypa1|23514  
AT3G21300.1 Phypa1|38856  
Phypa1|22975,Phypa1|20555,Phypa1|22118  
Phypa1|23226  
AT1G26480.1 Phypa1|39315,Phypa1|24090,Phypa1|38710,Phypa1|188  
AT5G16050.1,AT5G38480.1,AT3G02520.1  
Phypa1|39103,Phypa1|39104,Phypa1|37289,Phypa1|36784,Phypa1|10089  
AT1G22290.1,AT1G22300.1  
AT2G42590.3  
AT1G78220.1  
AT1G34760.1  
AT1G78300.1,AT4G09000.1,AT1G35160.1  
AT5G65430.1,AT5G10450.1  
AT2G10450.1  
Phypa1|30220  
Phypa1|28175  
AT4G20980.1,AT5G44320.1 Phypa1|953,Phypa1|465  
Phypa1|27297  
AT2G33800.1 Phypa1|31270  
Phypa1|26141,Phypa1|24446,Phypa1|26557  
AT1G70900.1,AT1G23110.1 Phypa1|36114  
Phypa1|26042  
AT1G09760.1 Phypa1|38590,Phypa1|34154,Phypa1|643  
AT1G09280.1 Phypa1|30373  
AT3G20560.1,AT1G50950.1,AT4G27080.1 Phypa1|38457  
AT3G60440.1,AT3G60420.1,AT3G60450.1,AT3G60430.1 Phypa1|27641  
AT4G25260.1,AT5G20740.1,AT1G14890.1,AT3G62820.1,AT4G12390.1,AT1G70720.1,AT1G23205.1,AT5G51520.1,A  
T3G47380.1,AT2G47670.1,AT1G62770.1,AT1G62760.1,AT5G62360.1,AT2G01610.1,AT5G62350.1  
Phypa1|749,Phypa1|6495  
AT2G22910.1,AT4G37670.2 Phypa1|2247  
Phypa1|1795  
AT3G57560.1 Phypa1|39144  
AT3G57090.1,AT5G12390.1 Phypa1|1192,Phypa1|33276  
AT1G33980.1 Phypa1|31840,Phypa1|34994  
Phypa1|7588  
AT1G21170.1,AT1G76850.1 Phypa1|24872,Phypa1|26021,Phypa1|25195,Phypa1|25905  
AT5G47480.1,AT5G47490.1 Phypa1|35842,Phypa1|34177  
ATCG00780.1 Phypa1|31279  
AT1G17560.1,AT5G46160.1 Phypa1|21032  
AT1G34050.1,AT2G01680.1,AT5G02620.1,AT5G60070.1,AT5G54710.1,AT1G10340.1,AT1G07710.1,AT3G09550.1,A  
T3G52830.1,AT5G54700.1,AT1G05640.1,AT2G24600.3,AT3G12360.1,AT5G50140.1,AT2G31820.1  
Phypa1|16479  
Phypa1|14381  
Phypa1|39720  
AT1G09300.1 Phypa1|27306

Phypa1|22306  
AT3G51800.2 Phypa1|37139,Phypa1|35087,Phypa1|27033  
AT5G14580.1 Phypa1|9128,Phypa1|30160  
AT3G03710.1 Phypa1|35328  
AT1G08490.1 Phypa1|24847,Phypa1|25118  
Phypa1|19358  
Phypa1|3088  
AT5G04990.1,AT3G10730.1 Phypa1|28983,Phypa1|36300  
AT5G56640.1,AT1G14520.1,AT2G19800.1,AT4G26260.1 Phypa1|2747  
AT2G35795.1,AT5G03030.1,AT3G09700.1 Phypa1|23951  
AT4G01230.1,AT3G10260.3,AT3G61560.2,AT4G11220.1,AT4G23630.1,AT2G46170.1,AT1G64090.1,AT5G41600.1  
Phypa1|38006,Phypa1|29392,Phypa1|39706,Phypa1|24956,Phypa1|32526,Phypa1|30227  
AT2G23640.1  
AT3G10915.3  
AT2G15280.1,AT3G19460.1  
AT2G01240.1  
AT1G68230.1,AT3G18260.1  
AT3G54120.1  
AT5G10920.1 Phypa1|24480  
Phypa1|22779,Phypa1|31171  
Phypa1|2263  
AT3G27320.1,AT5G14310.1 Phypa1|39781  
AT4G01050.1 Phypa1|39026  
AT3G25480.1  
Phypa1|820,Phypa1|819  
AT1G74560.2,AT1G18800.1 Phypa1|24530,Phypa1|35942  
AT5G21990.1 Phypa1|33426  
AT4G22740.1,AT2G45380.1 Phypa1|35631  
AT1G49490.1,AT1G62440.1,AT5G06630.1,AT4G18670.1,AT2G27380.1,AT1G26240.1,AT5G15780.1,AT3G19020.1,AT4G11430.1,AT4G06744.1,AT4G08380.1,AT4G13340.1,AT4G33970.1,AT2G27390.1,AT2G24980.1,AT1G26250.1,AT3G54590.1,AT5G35190.1,AT1G61080.1,AT5G57070.1,AT3G54580.1,AT4G08410.1,AT3G22800.1,AT4G13390.1,AT1G54215.1,AT5G11990.1,AT5G14920.1,AT1G12040.1,AT1G23720.1,AT3G22120.1,AT4G28380.1,AT3G28550.1,AT5G48920.1,AT4G08370.1,AT3G24480.1,AT4G15160.1,AT5G06640.1,AT4G08400.1,AT5G19810.1,AT1G21310.1,AT2G43150.1,AT4G38770.1,AT5G59170.1,AT5G49080.1 Phypa1|1912,Phypa1|19894,Phypa1|36358  
AT5G26080.1,AT1G76930.1 Phypa1|33953,Phypa1|8734,Phypa1|4215  
AT3G43583.1  
AT2G15880.1,AT3G22070.1,AT3G50580.1  
AT1G23040.1,AT1G02405.1  
AT5G55750.1  
AT3G20850.1,AT5G26070.1  
AT5G25550.1  
Phypa1|9482  
Phypa1|31633,Phypa1|12777  
Phypa1|32129,Phypa1|7288  
Phypa1|9280  
Phypa1|33219  
Phypa1|39495  
Phypa1|12721  
Phypa1|21928  
Phypa1|1121  
Phypa1|23980  
Phypa1|1493  
Phypa1|14236  
Phypa1|34459  
Phypa1|34933  
Phypa1|18513  
AT4G30890.1 Phypa1|37189  
AT3G14400.1 Phypa1|1415  
AT5G57990.1 Phypa1|17379,Phypa1|1422  
AT4G31670.1,AT2G24640.1 Phypa1|441,Phypa1|28705  
AT5G46740.1,AT4G17895.1  
AT4G24560.1,AT1G17110.1,AT5G65450.1  
Phypa1|25638,Phypa1|28110  
AT5G62130.1,AT1G16560.1 Phypa1|34014  
Phypa1|32350  
AT5G58060.1,AT5G58180.1 Phypa1|39291,Phypa1|26377  
AT3G16320.1,AT2G20000.1 Phypa1|25621,Phypa1|2841  
AT2G21530.1 Phypa1|32318,Phypa1|32065  
AT3G55610.1,AT2G39800.1 Phypa1|25304  
Phypa1|31204  
AT2G30870.1,AT2G30860.1 Phypa1|36714  
AT1G02920.1,AT4G02520.1,AT3G62760.1,AT2G02930.1,AT1G02930.1,AT2G47730.1,AT1G02950.2,AT1G02940.1  
AT3G03190.1,AT5G17220.1  
Phypa1|25468,Phypa1|25449,Phypa1|36228,Phypa1|26250  
Phypa1|32793  
Phypa1|33478,Phypa1|36802,Phypa1|26919  
AT2G37660.1,AT5G02240.1 Phypa1|24032,Phypa1|27933  
Phypa1|32289  
AT5G19500.1 Phypa1|37273  
Phypa1|4224  
AT2G22425.1,AT4G40042.1 Phypa1|2393,Phypa1|357  
Phypa1|3179

AT3G45590.1,AT5G60230.2 Phypa1|26389  
AT3G45577.1  
AT3G06650.1,AT5G49460.1 Phypa1|38564,Phypa1|36360  
AT3G45890.1 Phypa1|25173  
AT1G53580.1 Phypa1|25549,Phypa1|27464  
Phypa1|23619,Phypa1|23123  
AT2G26200.1 Phypa1|29177  
AT3G05550.1,AT5G27760.1 Phypa1|23697,Phypa1|2429  
AT1G72280.1,AT2G38960.2 Phypa1|36688,Phypa1|1001  
Phypa1|3579  
AT5G63300.1,AT3G27160.1 Phypa1|24026,Phypa1|3031,Phypa1|32391,Phypa1|32006  
AT2G45200.1 Phypa1|29211,Phypa1|8051  
AT3G44890.1 Phypa1|26147,Phypa1|39780,Phypa1|26128,Phypa1|35884  
AT4G36480.1 Phypa1|37928  
AT1G09795.1,AT1G58080.1 Phypa1|3782,Phypa1|37769  
AT3G06700.1,AT3G06680.1 Phypa1|23863,Phypa1|38405,Phypa1|24160  
AT1G17130.1 Phypa1|29802  
AT3G43250.1,AT2G32050.1  
AT3G62580.1 Phypa1|39273  
AT1G76100.1,AT1G20340.1 Phypa1|2424,Phypa1|38380,Phypa1|35027  
AT4G13270.1,AT1G52330.1 Phypa1|25689,Phypa1|34897  
AT5G50100.1 Phypa1|29248  
AT3G49560.1,AT5G24650.1 Phypa1|33549  
Phypa1|33435  
AT2G18710.1 Phypa1|36107  
Phypa1|31266  
AT3G09020.1,AT5G01250.1,AT1G61050.1 Phypa1|39362,Phypa1|1893  
AT2G38150.1  
AT3G25585.1,AT1G13560.1 Phypa1|37814,Phypa1|26729  
AT1G70210.1 Phypa1|39640,Phypa1|32157  
AT5G65420.1,AT5G10440.1,AT2G22490.1  
AT3G50070.1,AT4G34160.1,AT5G67260.1  
AT5G02110.1  
AT4G03270.1  
AT4G37630.1  
AT5G10160.1,AT2G22230.1 Phypa1|39099,Phypa1|1548,Phypa1|2090  
AT4G00860.1,AT1G01170.1 Phypa1|38078,Phypa1|38077  
AT2G40000.1,AT3G55840.1  
Phypa1|1002,Phypa1|1859,Phypa1|25329,Phypa1|1419,Phypa1|38165,Phypa1|1414  
AT3G02790.1,AT5G16470.1 Phypa1|27268,Phypa1|23996,Phypa1|37338  
AT3G02200.2,AT5G15610.1 Phypa1|38714,Phypa1|6915  
Phypa1|9718  
AT4G19006.1,AT5G45620.1 Phypa1|37214,Phypa1|38698  
AT1G69520.1,AT1G69526.2,AT1G69523.1 Phypa1|26879  
Phypa1|23319  
AT2G35630.1 Phypa1|23842,Phypa1|13409  
AT3G07690.1,AT2G41540.1 Phypa1|30071,Phypa1|27740  
AT2G40690.1 Phypa1|37904,Phypa1|28152  
Phypa1|389  
AT2G38840.1 Phypa1|27476  
Phypa1|27860,Phypa1|24525  
AT3G21140.1,AT1G51560.1 Phypa1|29850,Phypa1|25680  
AT4G10000.1 Phypa1|27724  
AT5G03880.1 Phypa1|557  
AT1G52710.1,AT3G15640.1,AT1G80230.1 Phypa1|23892  
Phypa1|29622  
AT1G21860.1,AT3G13390.1,AT1G21850.1,AT2G23630.1,AT4G22010.1,AT1G76160.1,AT1G55570.1,AT4G37160.1,A  
T4G28090.1,AT4G38420.1,AT5G66920.1,AT1G41830.1 Phypa1|29096  
AT5G51480.1,AT5G48450.1,AT4G25240.1,AT4G12420.1 Phypa1|28114  
AT1G75790.1  
AT3G13400.1,AT1G55560.1  
AT1G48380.1 Phypa1|35726,Phypa1|8379  
AT2G29570.1,AT1G07370.1 Phypa1|32782  
Phypa1|37696  
AT4G11800.1,AT4G23000.1 Phypa1|26840,Phypa1|28282  
AT4G27460.1,AT5G53750.1 Phypa1|33742,Phypa1|34649  
AT3G24350.1 Phypa1|28205,Phypa1|26174  
AT5G05760.1  
AT1G75510.1 Phypa1|28298  
AT3G52270.1  
AT5G15400.1 Phypa1|39384  
AT2G01300.1,AT1G15010.1 Phypa1|2188,Phypa1|815  
AT2G19810.1,AT2G25900.1,AT4G29190.1 Phypa1|29814,Phypa1|28681,Phypa1|29818  
AT2G41900.1,AT5G12850.1,AT2G40140.1,AT3G55980.1,AT5G58620.1  
AT1G03790.1,AT5G44260.1  
AT5G07500.1  
Phypa1|30617  
Phypa1|29343  
AT1G67140.1 Phypa1|33928  
AT2G39290.1,AT3G55030.1 Phypa1|2289,Phypa1|36659  
AT5G05470.1,AT2G40290.1 Phypa1|8820,Phypa1|38008  
AT1G22920.1,AT1G71230.1 Phypa1|37535,Phypa1|35938

AT3G47390.1 Phypa1|954,Phypa1|34391,Phypa1|35222,Phypa1|28790  
 AT3G61870.1 Phypa1|26858  
 AT3G55260.1 Phypa1|26776  
 AT1G65590.1  
 Phypa1|16246  
 AT1G31220.1 Phypa1|28413  
 Phypa1|30467  
 AT5G47435.1,AT4G17360.1 Phypa1|24697,Phypa1|25730,Phypa1|28504  
 Phypa1|22050  
 AT1G19700.1,AT2G27220.1,AT2G35940.1,AT2G23760.1,AT4G34610.1,AT2G16400.1,AT1G75410.1,AT4G36870.1  
 Phypa1|16934,Phypa1|17989  
 AT5G02030.1,AT2G27990.1,AT5G41410.1  
 AT4G32980.1  
 AT1G75430.1  
 Phypa1|8613  
 AT5G52390.1,AT3G54040.1 Phypa1|1589  
 AT1G32060.1 Phypa1|2432,Phypa1|24064,Phypa1|33987  
 Phypa1|4858  
 AT4G17070.1 Phypa1|37632  
 Phypa1|607  
 AT5G27430.1,AT3G05230.1 Phypa1|24248  
 AT1G51450.1 Phypa1|33579,Phypa1|4396  
 AT3G27740.1 Phypa1|24860,Phypa1|26062  
 Phypa1|31065,Phypa1|30771  
 AT1G25260.1 Phypa1|39105,Phypa1|39717  
 AT1G21065.1 Phypa1|39681  
 Phypa1|27828  
 AT1G08280.1 Phypa1|18303,Phypa1|9571  
 Phypa1|17994  
 AT3G16980.1,AT4G16265.1 Phypa1|35415  
 AT1G07180.1,AT2G29990.1 Phypa1|37143,Phypa1|36262  
 AT1G80620.1,AT1G15810.1 Phypa1|35051  
 AT3G59990.1,AT2G44180.1 Phypa1|36130,Phypa1|38290  
 AT3G01060.1 Phypa1|25575  
 AT5G64150.1 Phypa1|539  
 Phypa1|31034  
 AT5G22350.1 Phypa1|11430,Phypa1|27071  
 AT5G06180.1  
 AT1G36980.1 Phypa1|37282,Phypa1|1224  
 AT1G14810.1 Phypa1|29546  
 Phypa1|31329  
 AT3G57280.1 Phypa1|711,Phypa1|1261,Phypa1|2084  
 AT5G25250.1,AT5G25260.1,AT5G64870.1 Phypa1|26205  
 AT2G45060.1 Phypa1|32731  
 AT4G26410.1  
 AT3G51090.1,AT2G16460.1 Phypa1|39552,Phypa1|2056,Phypa1|27107,Phypa1|38468  
 AT1G02140.1 Phypa1|37173,Phypa1|24165  
 Phypa1|26609  
 AT1G68760.1 Phypa1|32738  
 Phypa1|21985  
 Phypa1|21323  
 AT5G43710.1 Phypa1|35360  
 AT1G27520.1  
 AT1G29880.1 Phypa1|37920  
 AT1G29870.1  
 AT3G44740.1  
 AT5G45380.1 Phypa1|39464,Phypa1|20826  
 AT1G09620.1 Phypa1|38504  
 AT1G08470.1,AT5G22020.1 Phypa1|30363,Phypa1|27627,Phypa1|36581,Phypa1|38000  
 AT2G41290.1,AT3G57030.1  
 AT1G74020.1,AT1G74000.1,AT1G74010.1  
 AT3G57020.1,AT2G41300.1,AT3G57010.1  
 AT3G59530.1  
 Phypa1|36367  
 AT1G75210.1 Phypa1|26504,Phypa1|30173  
 AT1G61900.1,AT2G30700.1 Phypa1|28667  
 AT3G57890.1,AT2G42230.2 Phypa1|25606,Phypa1|29368,Phypa1|38408,Phypa1|27002  
 AT1G65660.1,AT4G37120.1 Phypa1|36167  
 AT3G45950.1  
 AT2G33040.1 Phypa1|29624,Phypa1|30371,Phypa1|2992,Phypa1|25216  
 AT3G12300.1 Phypa1|34549  
 Phypa1|28674  
 Phypa1|26051  
 Phypa1|3040  
 AT3G11500.1,AT2G23930.1 Phypa1|37662,Phypa1|39758  
 AT5G57020.1 Phypa1|35913,Phypa1|2902  
 AT2G44175.1  
 AT5G05370.1,AT3G10860.1 Phypa1|39310,Phypa1|2418,Phypa1|23780,Phypa1|26328  
 AT2G18840.1,AT4G30260.1 Phypa1|2416,Phypa1|31523,Phypa1|34937  
 AT1G08410.1,AT2G27200.1 Phypa1|32816  
 AT2G25110.1 Phypa1|28212,Phypa1|27633  
 Phypa1|29059



AT1G12050.1 Phypa1|28193,Phypa1|37307  
Phypa1|30737  
Phypa1|30480  
AT5G64050.1 Phypa1|28159  
Phypa1|31496  
AT5G25780.1,AT5G27640.2 Phypa1|2850,Phypa1|39067  
AT1G49015.1  
AT1G31330.1 Phypa1|30209,Phypa1|2077,Phypa1|27039,Phypa1|2078  
AT5G55140.1 Phypa1|37344,Phypa1|37345  
AT4G37210.1 Phypa1|118,Phypa1|20104  
AT5G23330.1,AT5G08340.1 Phypa1|28323,Phypa1|17202  
AT2G04280.1,AT4G12700.1,AT4G08810.1 Phypa1|26070  
AT5G09900.1,AT5G64760.1 Phypa1|36624,Phypa1|35053  
Phypa1|28284  
AT5G25757.1,AT5G25754.1 Phypa1|39646,Phypa1|39365  
AT3G09960.1,AT3G09970.1 Phypa1|27813  
Phypa1|18256  
AT5G58510.1 Phypa1|34841  
Phypa1|16297  
Phypa1|32620  
AT5G17520.1 Phypa1|29579,Phypa1|25045,Phypa1|30355  
Phypa1|18289  
Phypa1|34915  
AT3G07570.1,AT3G61750.1 Phypa1|30627,Phypa1|35324,Phypa1|34066,Phypa1|1926  
AT5G47530.1,AT4G12980.1,AT3G25290.1,AT3G59070.1,AT5G35735.1  
Phypa1|37867,Phypa1|35618,Phypa1|26455,Phypa1|34522,Phypa1|29905  
AT4G17280.1,AT5G48750.1  
AT3G07390.1  
AT2G04850.1  
AT3G25920.1 Phypa1|1110,Phypa1|1113,Phypa1|29045,Phypa1|24811  
AT1G52500.2 Phypa1|37971,Phypa1|29144  
Phypa1|27486  
Phypa1|363  
AT5G65290.1 Phypa1|2942,Phypa1|24880  
AT1G69390.1 Phypa1|8277,Phypa1|37935,Phypa1|23688  
AT5G67590.1 Phypa1|2151,Phypa1|780  
Phypa1|9874  
AT1G21720.1,AT1G77440.1 Phypa1|34016,Phypa1|33972  
Phypa1|25636  
AT1G02120.1 Phypa1|28039  
AT4G10310.1 Phypa1|9435  
AT1G02090.1 Phypa1|27239,Phypa1|37828  
AT4G03400.1,AT2G46370.1 Phypa1|23847  
AT5G13380.1,AT5G13370.1,AT5G54510.1,AT4G37390.1,AT1G28130.1,AT5G13350.1,AT5G51470.1,AT5G13360.1,AT2G14960.1,AT2G23170.1,AT1G23160.1,AT4G27260.1,AT1G48670.1,AT5G13320.1,AT1G48660.1,AT2G47750.1,AT1G59500.1 Phypa1|39588  
AT1G48690.1  
AT2G44090.1,AT3G59910.1 Phypa1|39098,Phypa1|38275,Phypa1|26116,Phypa1|37552  
AT4G32590.3 Phypa1|32495  
AT3G16250.1  
AT5G17990.1 Phypa1|39230  
Phypa1|31387,Phypa1|31236  
AT5G62290.1 Phypa1|32637,Phypa1|2199  
AT4G34930.1,AT4G38690.1,AT4G34920.1 Phypa1|35506,Phypa1|32923,Phypa1|39178  
AT2G16190.1,AT1G49330.1 Phypa1|615,Phypa1|33534  
AT1G50480.1 Phypa1|34823  
AT2G12280.1  
AT2G12200.1  
Phypa1|30848  
AT5G20380.1 Phypa1|37515  
AT2G29650.1,AT4G00370.1 Phypa1|38429  
AT3G46980.3 Phypa1|38637  
AT5G44370.1 Phypa1|35693  
AT2G38060.1  
Phypa1|21780,Phypa1|22133,Phypa1|30445  
Phypa1|21629  
AT1G63050.1,AT1G12640.1 Phypa1|24055  
Phypa1|2668,Phypa1|35931  
AT3G56940.1 Phypa1|29315  
Phypa1|533  
AT3G42050.1 Phypa1|38605,Phypa1|32063  
Phypa1|347  
AT1G54250.1,AT3G59600.1 Phypa1|36287  
AT3G01790.1 Phypa1|30215  
AT1G68000.1,AT4G38570.1 Phypa1|28801  
AT5G48440.1 Phypa1|25889  
Phypa1|31400  
AT5G42740.1 Phypa1|36432,Phypa1|37989,Phypa1|29265  
Phypa1|25046  
AT1G60680.1,AT1G60710.1,AT1G10810.1,AT1G60690.1,AT1G60730.1 Phypa1|37917,Phypa1|37386  
Phypa1|31488,Phypa1|31472  
Phypa1|30432,Phypa1|30035,Phypa1|17145,Phypa1|34594,Phypa1|30907,Phypa1|36135,Phypa1|24021

AT2G42310.1,AT3G57785.1 Phypa1|1277,Phypa1|28924  
AT1G67080.1 Phypa1|27634,Phypa1|27389  
AT4G13720.1 Phypa1|36859  
AT1G74700.1 Phypa1|30828  
AT2G04530.1  
Phypa1|31950  
AT5G47030.1 Phypa1|24629,Phypa1|254,Phypa1|24654  
AT1G52370.1,AT4G28360.1 Phypa1|27730  
ATCG00810.1 Phypa1|31269  
AT1G15110.1 Phypa1|24948,Phypa1|37392  
AT4G25550.1 Phypa1|25812  
AT4G29820.1  
AT5G14800.1 Phypa1|28258  
Phypa1|31207  
Phypa1|22004  
AT1G05940.1 Phypa1|30278  
AT1G58030.1,AT5G36940.1,AT3G03720.1 Phypa1|37705  
AT4G21120.1 Phypa1|32844,Phypa1|36009  
AT3G10600.1,AT5G04770.1 Phypa1|36825,Phypa1|25343  
AT1G17120.1,AT2G34960.1  
Phypa1|30424,Phypa1|20573,Phypa1|31012  
Phypa1|5122,Phypa1|31200  
Phypa1|31343  
Phypa1|23193  
Phypa1|21738  
AT1G68590.1 Phypa1|25028,Phypa1|34961  
AT5G15760.1  
AT3G12050.1 Phypa1|39740,Phypa1|38799  
AT4G27650.1,AT3G58390.1 Phypa1|2477  
AT3G59950.1,AT2G44140.1 Phypa1|1850,Phypa1|979  
AT1G27760.3 Phypa1|38277,Phypa1|15972,Phypa1|33906  
AT1G50430.1 Phypa1|23716  
Phypa1|3892  
AT4G24730.1 Phypa1|27445,Phypa1|24845  
Phypa1|18584  
Phypa1|24821  
AT3G21360.1 Phypa1|24223  
AT2G15390.1,AT2G03210.1,AT2G15350.1,AT1G74420.2,AT1G14080.1,AT2G03220.1,AT2G15370.1,AT1G14070.1  
Phypa1|489,Phypa1|30230  
AT1G14110.1  
Phypa1|16174,Phypa1|15388  
Phypa1|993  
Phypa1|32576  
Phypa1|15389  
Phypa1|37109,Phypa1|1933  
AT3G54470.1 Phypa1|24139,Phypa1|23941  
Phypa1|30764  
AT3G55010.1 Phypa1|26358,Phypa1|26831  
Phypa1|31377,Phypa1|30451  
AT4G34840.1,AT4G38800.1 Phypa1|17935,Phypa1|39461,Phypa1|2886  
AT1G65820.1 Phypa1|28730,Phypa1|39692,Phypa1|37492  
Phypa1|33843  
AT3G06483.1 Phypa1|39358,Phypa1|29985  
AT1G74260.1 Phypa1|35637  
Phypa1|23643  
Phypa1|31459  
AT5G61450.1 Phypa1|37046,Phypa1|36372  
Phypa1|32296  
AT5G11500.1 Phypa1|38354,Phypa1|23989  
Phypa1|25383  
AT3G25400.1 Phypa1|39746,Phypa1|39325  
AT4G29360.1,AT2G01630.1,AT5G55180.1,AT2G05790.1,AT5G56590.1,AT4G26830.1  
Phypa1|37271,Phypa1|27164  
AT1G29380.1  
Phypa1|3014,Phypa1|32197,Phypa1|2984,Phypa1|3015,Phypa1|24687,Phypa1|34130,Phypa1|2637,Phyp  
a1|1075  
Phypa1|38906,Phypa1|35647  
Phypa1|2971,Phypa1|16853  
Phypa1|37850  
Phypa1|2202  
Phypa1|21276  
AT5G63840.1 Phypa1|37077  
AT3G45940.1,AT1G68560.1  
Phypa1|2531,Phypa1|28405,Phypa1|38247,Phypa1|38365,Phypa1|38178,Phypa1|27827,Phypa1|36897,P  
hypa1|10619,Phypa1|24045,Phypa1|37759,Phypa1|26073  
AT3G23640.1 Phypa1|26549,Phypa1|7643,Phypa1|29351,Phypa1|24583,Phypa1|39120  
AT5G11720.1  
Phypa1|9519,Phypa1|18554  
Phypa1|29553  
Phypa1|5523  
AT2G43360.1 Phypa1|24172,Phypa1|33161  
Phypa1|31048

AT1G44575.1 Phypa1|29338  
AT5G03555.1 Phypa1|37448,Phypa1|25747  
Phypa1|30912  
AT4G10630.1,AT1G32760.1,AT5G03870.1  
Phypa1|30388,Phypa1|24794,Phypa1|34049,Phypa1|2101,Phypa1|668,Phypa1|669,Phypa1|27655  
AT5G01420.1,AT5G06470.1  
AT5G39865.1,AT2G41330.1,AT3G57070.1,AT3G28850.1  
AT3G11773.1  
AT5G58530.1,AT5G13810.1  
AT1G64500.1  
AT5G38420.1,AT5G38430.1,AT1G67090.1,AT5G38410.1  
Phypa1|24262,Phypa1|14775,Phypa1|3024,Phypa1|26156,Phypa1|38186,Phypa1|36218,Phypa1|34490,Phypa1|24137,Phypa1|23840,Phypa1|39328,Phypa1|2925,Phypa1|29438,Phypa1|24924,Phypa1|26437,Phypa1|38156,Phypa1|9576,Phypa1|270,Phypa1|14766,Phypa1|39575,Phypa1|37072,Phypa1|30231,Phypa1|24115,Phypa1|30179,Phypa1|35808,Phypa1|26445  
Phypa1|25068,Phypa1|29217,Phypa1|26443  
Phypa1|39657  
AT4G17260.1 Phypa1|37726,Phypa1|29371,Phypa1|2554  
Phypa1|30492  
AT5G58330.1 Phypa1|17608,Phypa1|8219,Phypa1|9558  
Phypa1|2890  
AT5G05570.1 Phypa1|32058  
Phypa1|14131  
AT1G63900.1 Phypa1|36046,Phypa1|39234  
AT1G59560.1  
AT1G69340.1 Phypa1|25870,Phypa1|39329  
AT5G64200.1 Phypa1|35670,Phypa1|26057  
AT5G18660.1 Phypa1|37246  
Phypa1|13020  
AT5G10690.1 Phypa1|36359  
AT3G05870.1 Phypa1|2626  
AT5G26640.1  
Phypa1|28423  
AT5G24360.1,AT2G17520.1 Phypa1|25750,Phypa1|33191  
AT3G11870.1  
AT3G04010.1,AT2G19440.1,AT5G64790.1,AT4G17180.1,AT5G58090.1,AT1G64760.1,AT5G20870.1,AT5G18220.1,AT3G24330.1,AT4G31140.1 Phypa1|23746,Phypa1|36071,Phypa1|23987,Phypa1|39198,Phypa1|8711  
AT5G58480.1  
Phypa1|2884  
Phypa1|12361  
AT5G55510.1,AT4G26670.1 Phypa1|1155,Phypa1|704  
AT2G23420.1,AT4G36940.1 Phypa1|30390  
Phypa1|30463  
AT1G79830.1 Phypa1|34988  
Phypa1|24967  
AT4G11420.1 Phypa1|24648,Phypa1|38963,Phypa1|38761  
AT1G32750.1,AT3G19040.1 Phypa1|33616,Phypa1|17926  
AT5G58040.1,AT3G66652.1 Phypa1|32351  
AT4G37790.1,AT4G16780.1,AT2G44910.1,AT5G06710.1,AT3G60390.1  
Phypa1|6641,Phypa1|26064,Phypa1|7735,Phypa1|25612  
AT2G22800.1  
AT2G01430.1,AT1G70920.1  
AT4G17460.1,AT5G47370.1  
Phypa1|30778,Phypa1|26011,Phypa1|28940,Phypa1|26347  
AT1G24560.1 Phypa1|32025  
AT3G49055.1  
AT3G19840.1 Phypa1|3466,Phypa1|7443,Phypa1|38519  
AT1G60200.1 Phypa1|1573  
Phypa1|38821  
AT2G30880.1 Phypa1|30547  
Phypa1|1010  
AT1G55928.1,AT2G27285.1,AT2G27280.1 Phypa1|33874  
AT4G02720.1 Phypa1|36924  
AT4G20760.1 Phypa1|26466  
Phypa1|23223  
AT4G22350.1 Phypa1|940  
AT4G22410.1  
AT1G16770.1 Phypa1|36686  
AT5G15710.1  
Phypa1|34128,Phypa1|1880,Phypa1|20221,Phypa1|33914,Phypa1|24873,Phypa1|21834,Phypa1|32030,Phypa1|16569  
Phypa1|10187,Phypa1|35282,Phypa1|32003,Phypa1|35296  
Phypa1|19291,Phypa1|33941,Phypa1|35559,Phypa1|31511,Phypa1|1891,Phypa1|35538,Phypa1|16140,Phypa1|33239  
Phypa1|32649,Phypa1|8357,Phypa1|33019  
Phypa1|33400,Phypa1|11862,Phypa1|34198  
Phypa1|32862  
Phypa1|3161  
AT5G21160.1 Phypa1|34027,Phypa1|38535  
AT5G44500.1,AT4G20440.1 Phypa1|2353,Phypa1|39602,Phypa1|2354,Phypa1|32390  
AT2G32600.1 Phypa1|19333,Phypa1|1088  
Phypa1|21608

AT3G16650.1,AT4G15900.1 Phypa1|28586,Phypa1|35685  
AT1G58230.1 Phypa1|29348  
AT1G58227.1  
AT4G21130.1,AT4G05410.1 Phypa1|39351,Phypa1|964  
AT3G55660.1,AT5G02010.1,AT5G05940.1,AT4G38430.1  
Phypa1|51,Phypa1|2253,Phypa1|1825,Phypa1|1824,Phypa1|962  
AT5G19560.1,AT4G13240.1,AT3G24620.1,AT3G16130.1,AT1G52240.1,AT1G79860.1  
AT2G45890.1,AT1G01700.1  
AT1G31650.1  
Phypa1|937  
AT5G25150.1 Phypa1|39014  
AT3G05090.1 Phypa1|38832,Phypa1|26747,Phypa1|2580  
Phypa1|10813  
AT3G07300.1 Phypa1|28044,Phypa1|26715  
AT5G16780.1 Phypa1|38912  
AT3G14700.1  
AT3G25840.1 Phypa1|29064,Phypa1|29427  
AT1G13350.1,AT3G53640.1  
AT5G51410.1 Phypa1|25339  
Phypa1|35013  
AT1G53720.1 Phypa1|26140  
AT1G44478.1  
AT1G80930.1 Phypa1|33325  
AT1G52325.1  
AT5G10800.1,AT5G25060.1 Phypa1|28133,Phypa1|37553  
AT3G19910.1 Phypa1|27772  
AT5G24870.1,AT5G10650.1,AT4G31450.1 Phypa1|29450,Phypa1|28484  
AT3G63530.1  
AT3G47180.1  
AT5G52150.1  
AT1G17970.1,AT1G73760.1,AT2G37150.1  
AT3G15070.1,AT1G53190.1  
AT1G33520.1,AT4G25020.1 Phypa1|35214  
AT3G20550.1 Phypa1|25246  
Phypa1|1313  
AT1G28060.1 Phypa1|35123  
AT3G56790.1,AT3G55930.1  
AT1G65280.1 Phypa1|33415  
Phypa1|8733  
AT4G30600.1 Phypa1|11279,Phypa1|18791  
AT1G01510.1 Phypa1|17876,Phypa1|1372  
Phypa1|938,Phypa1|26421  
AT3G06950.1 Phypa1|2577  
Phypa1|396  
AT2G25670.1,AT4G32610.1 Phypa1|23920,Phypa1|34011  
AT1G67120.1 Phypa1|1  
Phypa1|37235  
AT1G17840.1 Phypa1|6760,Phypa1|30171,Phypa1|29406,Phypa1|2919  
AT2G28070.1  
AT3G21080.1,AT1G51460.1,AT1G51500.1,AT3G21090.1  
Phypa1|19299  
Phypa1|30109,Phypa1|27252  
AT5G06680.1 Phypa1|32727,Phypa1|39589  
AT4G03320.1 Phypa1|26395,Phypa1|28869  
AT2G33630.1 Phypa1|39015  
Phypa1|33160  
AT3G21640.1 Phypa1|39644  
AT1G14030.1 Phypa1|30986  
AT2G27920.1 Phypa1|29497  
AT4G26600.1,AT5G55920.1 Phypa1|29249  
AT1G67940.1 Phypa1|27662  
AT1G63270.1 Phypa1|25101  
AT5G03910.1 Phypa1|25025  
AT1G65410.1 Phypa1|36457,Phypa1|25192  
AT4G33460.1 Phypa1|665  
AT4G25450.1 Phypa1|37541  
AT1G02530.1,AT3G28415.1,AT5G46540.1,AT3G28380.1,AT4G01830.1,AT1G02520.1,AT4G01820.1,AT3G28345.1,AT2G47000.1,AT3G62150.1 Phypa1|38079,Phypa1|2911,Phypa1|24311,Phypa1|39676  
AT1G70610.1 Phypa1|39554,Phypa1|39527  
AT3G55320.1,AT2G39480.1 Phypa1|25556  
AT5G39040.1 Phypa1|3125  
AT5G14100.1 Phypa1|29760  
AT1G10680.1,AT1G27940.1,AT2G36910.1,AT4G25960.1,AT3G28860.1,AT1G28010.1  
Phypa1|25919,Phypa1|35023,Phypa1|28630  
AT4G28620.1,AT4G28630.1,AT5G58270.1 Phypa1|24034,Phypa1|16595  
AT4G18050.1  
Phypa1|31222,Phypa1|30752,Phypa1|30597  
Phypa1|31326,Phypa1|30840,Phypa1|21480,Phypa1|30602,Phypa1|30976,Phypa1|30487,Phypa1|287,Phypa1|30734  
Phypa1|30429,Phypa1|31332,Phypa1|31194  
Phypa1|31247  
Phypa1|31098,Phypa1|31150,Phypa1|31354

Phypa1|30926  
Phypa1|22529  
Phypa1|30816,Phypa1|30440,Phypa1|31174,Phypa1|31021,Phypa1|30475,Phypa1|23010  
Phypa1|31103,Phypa1|30948,Phypa1|30974,Phypa1|30683  
Phypa1|30956  
Phypa1|21476  
Phypa1|30582,Phypa1|31353,Phypa1|31074  
Phypa1|30826  
Phypa1|37984  
Phypa1|21628  
Phypa1|23916  
Phypa1|9875  
Phypa1|31458,Phypa1|23606  
Phypa1|31391  
Phypa1|6535  
Phypa1|26878,Phypa1|35991  
Phypa1|30821,Phypa1|30672,Phypa1|30879,Phypa1|30669,Phypa1|30590,Phypa1|31036  
Phypa1|306  
Phypa1|30428,Phypa1|30825,Phypa1|2250  
Phypa1|31023  
Phypa1|2581  
Phypa1|31471,Phypa1|31486  
Phypa1|30421,Phypa1|31323,Phypa1|30679,Phypa1|30427  
Phypa1|10877  
Phypa1|12921  
Phypa1|31218,Phypa1|30036  
Phypa1|30975  
Phypa1|39600  
AT2G27810.1 Phypa1|37288,Phypa1|26196,Phypa1|24584  
AT2G05760.1,AT2G34190.1 Phypa1|27211  
AT4G38050.1  
AT1G60030.1,AT5G62890.1,AT1G10540.1,AT5G49990.1,AT1G65550.1,AT1G49960.1  
AT5G25420.1  
Phypa1|37698,Phypa1|39133,Phypa1|39132,Phypa1|39548,Phypa1|37313  
Phypa1|2905  
AT1G65470.1 Phypa1|19672  
AT5G35930.1 Phypa1|26478  
Phypa1|23257,Phypa1|22107  
AT4G39120.1 Phypa1|28320,Phypa1|38538,Phypa1|27892  
AT3G50590.1 Phypa1|26198  
Phypa1|6634  
AT5G06420.1,AT1G01350.1 Phypa1|37096  
AT4G01023.1  
AT4G26570.2,AT5G55990.1 Phypa1|32240  
AT1G64480.1  
AT4G17615.1,AT5G47100.1  
AT5G24270.1  
AT4G33000.1  
AT4G01420.1  
Phypa1|38951,Phypa1|31582  
AT5G05970.1 Phypa1|33709,Phypa1|28066,Phypa1|4031,Phypa1|24321  
AT4G21520.1 Phypa1|37034  
AT5G40160.1,AT5G66055.1 Phypa1|34457  
AT5G39840.1 Phypa1|28148  
AT4G14790.1  
AT1G71696.2 Phypa1|958  
Phypa1|21081  
AT3G07560.1 Phypa1|33905  
AT1G27090.1 Phypa1|38595,Phypa1|14013  
AT3G24690.1  
AT1G65040.2,AT3G16090.1 Phypa1|79  
AT2G33230.1,AT1G04180.1,AT5G43890.1,AT5G11320.1,AT4G28720.1,AT1G04610.1,AT4G13260.1,AT5G25620.1  
Phypa1|28149,Phypa1|4481,Phypa1|28949,Phypa1|25873  
AT1G48910.1,AT1G21430.1,AT4G32540.1  
Phypa1|22915  
Phypa1|2569  
Phypa1|24075  
Phypa1|20877  
AT5G60190.1 Phypa1|34309  
AT4G26470.1 Phypa1|28875,Phypa1|38108  
AT3G24110.1  
AT4G24460.1,AT5G19380.1 Phypa1|38254,Phypa1|38679  
AT5G12170.1  
AT2G43940.1,AT2G43910.1,AT2G43920.1 Phypa1|2995  
AT2G43945.1,AT3G59870.1 Phypa1|35397,Phypa1|28080  
Phypa1|14365  
AT2G07560.1,AT1G80660.1,AT2G18960.1,AT3G47950.1,AT5G62670.1,AT5G57350.1,AT3G60330.1,AT4G30190.1,A  
T2G24520.1,AT3G42640.1,AT1G17260.1 Phypa1|30544  
Phypa1|37950  
Phypa1|16998  
Phypa1|13786  
Phypa1|13664

AT5G08600.1,AT4G02400.1 Phypa1|33385  
AT1G25540.1 Phypa1|34895  
Phypa1|17317  
AT5G64420.1 Phypa1|3950,Phypa1|10139  
AT5G28740.1 Phypa1|37283  
AT3G17040.1 Phypa1|26088  
AT1G17890.1,AT1G73250.1 Phypa1|37876  
Phypa1|30739  
Phypa1|30869  
AT5G04260.1 Phypa1|30252,Phypa1|328  
AT5G06690.2  
AT5G51970.1 Phypa1|36376  
Phypa1|30057  
Phypa1|23288  
Phypa1|31348  
AT1G79010.1,AT1G16700.1 Phypa1|25372,Phypa1|33462  
Phypa1|31052  
AT1G77510.1,AT1G21750.1 Phypa1|27103  
AT3G62510.1  
AT2G32920.1,AT1G04980.1 Phypa1|18651  
AT5G15810.1,AT3G02320.1 Phypa1|25080  
AT2G35320.1 Phypa1|25596,Phypa1|28606  
Phypa1|27123  
Phypa1|15222  
AT1G76680.2,AT1G76690.1,AT1G09400.1 Phypa1|30099,Phypa1|31695,Phypa1|31507,Phypa1|27338  
AT2G06050.1  
AT1G18020.1,AT1G17990.1  
Phypa1|30023,Phypa1|31291,Phypa1|178  
Phypa1|24267,Phypa1|2431  
Phypa1|32056  
Phypa1|31055  
Phypa1|5902  
AT5G16620.1 Phypa1|34215,Phypa1|33783  
AT2G04400.1,AT5G48220.1 Phypa1|30117  
Phypa1|31237  
AT3G60820.1 Phypa1|8722,Phypa1|28867  
AT5G18800.1,AT3G06310.1 Phypa1|35620,Phypa1|37569,Phypa1|19729  
AT3G46450.2 Phypa1|32288,Phypa1|25753  
Phypa1|35777  
AT5G41110.1,AT3G26890.1 Phypa1|34666  
AT2G17340.1,AT4G35360.1,AT2G17320.1 Phypa1|24122  
AT1G71950.1 Phypa1|33896  
AT4G15930.1 Phypa1|30155,Phypa1|28767  
AT3G14590.1,AT1G53590.1 Phypa1|35417  
Phypa1|31587  
AT2G46900.1 Phypa1|25981,Phypa1|27179  
AT4G17580.1,AT5G47120.1 Phypa1|38849  
AT5G47130.1  
AT1G77000.1,AT1G21410.1 Phypa1|38033,Phypa1|27964,Phypa1|30308  
AT3G24570.1 Phypa1|25341  
AT5G05680.1 Phypa1|36562  
AT5G15530.1,AT5G16390.1 Phypa1|25052  
Phypa1|1727  
Phypa1|30033  
AT1G75060.1,AT1G19330.1 Phypa1|671,Phypa1|38117,Phypa1|207,Phypa1|19687,Phypa1|30158  
AT1G69380.1,AT5G13610.1 Phypa1|26723,Phypa1|36506  
AT5G38690.1,AT1G67270.1,AT1G67780.1 Phypa1|7097  
AT1G04140.2,AT5G43930.1 Phypa1|28324,Phypa1|26469  
AT1G16210.1 Phypa1|23779,Phypa1|35807  
AT5G11580.1 Phypa1|933,Phypa1|26815,Phypa1|27917,Phypa1|26915  
Phypa1|9419,Phypa1|27156  
AT3G54210.1 Phypa1|26907,Phypa1|27284,Phypa1|25859  
AT5G09770.1,AT5G64650.1 Phypa1|28834  
Phypa1|31352  
AT1G48320.1,AT5G48950.1 Phypa1|2341,Phypa1|33169  
Phypa1|322  
AT5G43860.1 Phypa1|24812  
AT1G19670.1  
AT5G25370.1,AT1G52570.1,AT3G15730.1 Phypa1|33037  
AT4G11830.2,AT2G42010.1,AT4G00240.1,AT4G11840.1,AT4G11850.1  
Phypa1|14966,Phypa1|25240,Phypa1|23775,Phypa1|37956  
AT1G55180.1  
AT4G35790.1  
Phypa1|38201,Phypa1|38890,Phypa1|23696  
Phypa1|11390  
Phypa1|35928  
AT3G18890.1 Phypa1|26296  
AT5G55940.1 Phypa1|2673  
AT5G51620.2  
Phypa1|6940  
AT3G50960.1,AT5G66410.1 Phypa1|36709  
AT3G24100.1,AT4G13615.1 Phypa1|2238,Phypa1|3967

AT2G31140.1,AT1G06200.1 Phypa1|26794,Phypa1|38576  
AT1G19485.1 Phypa1|35668  
AT3G06930.2,AT5G49020.1 Phypa1|25913,Phypa1|24878  
AT2G23740.1 Phypa1|37009,Phypa1|37957  
Phypa1|27470  
Phypa1|35604  
AT1G15280.2,AT1G80000.1 Phypa1|34535,Phypa1|34534  
AT1G77680.1 Phypa1|37424  
Phypa1|22528  
AT1G65220.1,AT5G36230.1 Phypa1|39782,Phypa1|24023,Phypa1|36324  
AT5G11470.1 Phypa1|3915  
AT3G15605.1  
Phypa1|33470  
AT5G67220.1 Phypa1|29758,Phypa1|1911  
Phypa1|20931  
AT3G10800.1,AT3G56660.1,AT2G40950.1 Phypa1|25423,Phypa1|824  
AT5G36240.1,AT3G43490.1,AT3G43590.1 Phypa1|1197  
AT2G19170.1,AT4G30020.1 Phypa1|27802,Phypa1|31645,Phypa1|27692  
AT4G21160.1,AT4G05330.1 Phypa1|2593,Phypa1|39500,Phypa1|28811  
AT2G04160.1,AT5G59810.1 Phypa1|2935  
AT4G34980.1,AT3G14240.1 Phypa1|38392,Phypa1|25227  
AT5G44530.1,AT1G30600.1,AT4G20430.1  
AT1G62340.1  
AT1G70800.1,AT1G48590.1,AT1G66360.1,AT1G70810.1,AT5G37740.1,AT2G01540.1,AT3G07940.1,AT1G23140.1,AT1G70790.1,AT3G17980.1,AT1G73580.1  
AT5G47710.1  
AT4G21326.1,AT1G32960.1,AT1G66210.1,AT4G21650.1,AT4G21630.1,AT4G21640.1,AT1G32950.1,AT5G11940.1,AT4G10540.1,AT1G32970.1,AT4G10550.1,AT1G32940.1,AT1G66220.1,AT4G10530.1,AT4G10520.1,AT4G21323.1,AT4G10510.1  
AT1G32980.1  
AT5G45640.1,AT5G45650.1  
AT4G00230.1  
AT4G26330.1  
AT5G51750.1,AT5G67360.1  
AT2G39850.1,AT5G59090.1,AT4G15040.1,AT3G46840.1,AT5G59190.1,AT5G03620.1,AT5G59100.1,AT5G59120.1  
AT2G05920.1  
AT1G20160.1  
AT3G14067.1  
AT1G01900.1  
AT5G59110.1  
AT5G67090.1  
AT1G04110.1  
Phypa1|2677,Phypa1|26209,Phypa1|24713  
Phypa1|4839  
Phypa1|36758  
Phypa1|14555,Phypa1|26978,Phypa1|17281  
AT5G02180.1,AT2G39130.1,AT3G54830.1 Phypa1|35369,Phypa1|40  
AT3G09330.1,AT5G02170.1,AT3G09340.1  
AT2G41190.1  
Phypa1|30138,Phypa1|25664,Phypa1|1020  
Phypa1|31946  
AT4G34030.1 Phypa1|38580  
Phypa1|3006,Phypa1|30940  
AT4G29690.1,AT4G29680.1 Phypa1|28139  
AT4G29710.1,AT4G29700.1  
Phypa1|26597  
AT2G45000.1 Phypa1|33741  
AT5G13450.1 Phypa1|27037,Phypa1|37222,Phypa1|24203  
Phypa1|31041  
AT2G37860.3,AT5G22790.1 Phypa1|13103  
AT5G06160.1 Phypa1|37658  
AT1G35530.1 Phypa1|4365  
Phypa1|31723  
AT3G52390.2 Phypa1|33427  
AT3G02590.1,AT3G02580.1 Phypa1|27898  
AT2G32380.1,AT1G05210.1,AT1G05220.1 Phypa1|285  
AT5G23630.1 Phypa1|24732  
Phypa1|29595  
AT2G46520.1 Phypa1|13170,Phypa1|36578  
AT3G08960.1 Phypa1|27922,Phypa1|30279  
AT1G68640.1,AT5G06950.1,AT3G12250.4,AT5G06960.1 Phypa1|29493,Phypa1|6586,Phypa1|2969,Phypa1|37183  
AT1G09950.1,AT5G65210.1,AT1G77920.1,AT5G10030.1,AT1G58330.1  
AT1G22070.1  
AT5G06839.1,AT1G08320.1  
AT1G20450.1,AT4G38410.1,AT1G20440.1,AT1G76180.1 Phypa1|35785,Phypa1|35734  
AT2G26280.1 Phypa1|33108,Phypa1|34225  
AT4G12740.1 Phypa1|34148  
Phypa1|22710  
AT1G70070.1 Phypa1|28726,Phypa1|39317  
Phypa1|9846  
Phypa1|16283  
AT5G14520.1 Phypa1|1388

AT2G24260.1,AT5G58010.1,AT4G30980.1 Phypa1|28636,Phypa1|29004  
 AT4G02590.1,AT1G03040.1  
 AT3G51290.1 Phypa1|25056,Phypa1|434,Phypa1|26349,Phypa1|26004  
 AT1G80460.1 Phypa1|26631  
 Phypa1|19430  
 Phypa1|21297  
 AT4G30310.2 Phypa1|23950  
 Phypa1|19403,Phypa1|31155  
 Phypa1|19412  
 AT4G17370.1 Phypa1|38245  
 Phypa1|23082  
 AT5G47860.1 Phypa1|35689  
 AT1G22970.1,AT1G71150.1,AT1G22980.1 Phypa1|27081  
 AT4G04330.1 Phypa1|27220  
 AT1G75170.1,AT4G36640.1 Phypa1|24208,Phypa1|1488,Phypa1|37676  
 AT1G01630.1 Phypa1|25617,Phypa1|26048,Phypa1|29054  
 AT5G63060.1 Phypa1|24546  
 AT4G08690.1,AT1G22180.2  
 AT1G14820.3  
 Phypa1|26846  
 Phypa1|25718  
 AT5G27410.1,AT3G05190.1 Phypa1|27064,Phypa1|28700  
 Phypa1|31360  
 AT1G08400.1,AT3G47700.1 Phypa1|29573  
 AT5G22620.1 Phypa1|26267  
 Phypa1|28965  
 AT5G53490.1 Phypa1|29990  
 AT4G02030.1 Phypa1|37131  
 Phypa1|411  
 AT5G55580.1 Phypa1|987,Phypa1|28112  
 AT3G30775.1,AT5G38710.1 Phypa1|25465,Phypa1|29359,Phypa1|38681  
 AT5G41460.1,AT4G00300.1,AT1G01570.1,AT4G11350.1,AT4G23490.1,AT1G07850.1  
 Phypa1|478,Phypa1|37106,Phypa1|972,Phypa1|37361  
 AT1G33250.1 Phypa1|27344  
 AT4G15240.1,AT2G37730.1,AT1G05280.1  
 AT5G12460.1  
 AT3G11420.1  
 Phypa1|28472,Phypa1|25018  
 Phypa1|486  
 AT5G13800.1 Phypa1|26263  
 AT3G25660.1 Phypa1|26397,Phypa1|39296  
 Phypa1|30454  
 Phypa1|1347  
 AT5G18590.1 Phypa1|7442,Phypa1|3465  
 Phypa1|26145,Phypa1|8298  
 AT2G17930.1,AT4G36080.1 Phypa1|36703  
 AT3G01720.1 Phypa1|26712,Phypa1|37568  
 AT1G54217.1,AT5G57060.1,AT4G26060.1 Phypa1|852,Phypa1|1283  
 AT1G61100.1,AT4G27430.1 Phypa1|29744,Phypa1|28816  
 AT3G54610.1 Phypa1|27130  
 AT4G13345.1,AT3G24460.1 Phypa1|37182  
 AT2G33205.1  
 Phypa1|24882  
 AT3G63520.1 Phypa1|31800,Phypa1|13465  
 AT3G24220.1,AT3G14440.1,AT4G18350.1,AT1G30100.1,AT1G78390.1 Phypa1|2719,Phypa1|35714  
 AT4G19170.1  
 Phypa1|33862,Phypa1|24082  
 AT1G61150.2 Phypa1|30359,Phypa1|29583  
 AT4G09300.1  
 AT1G11110.1  
 Phypa1|25670  
 AT1G58766.1,AT1G59077.1,AT1G17450.1,AT1G59453.1 Phypa1|4729  
 AT3G28460.1 Phypa1|28013  
 Phypa1|21385  
 AT3G49320.1,AT5G41970.1 Phypa1|36347,Phypa1|26743  
 AT5G22080.1 Phypa1|35561  
 AT5G22780.1,AT5G22770.1 Phypa1|38373,Phypa1|28608,Phypa1|39770  
 AT2G47600.1 Phypa1|955,Phypa1|28502  
 AT1G11060.1,AT1G61030.1 Phypa1|35371  
 AT3G04780.1 Phypa1|2978,Phypa1|36427  
 Phypa1|16126  
 AT4G38630.1 Phypa1|31870  
 AT4G28750.1,AT2G20260.1 Phypa1|335,Phypa1|1701,Phypa1|27488  
 AT2G28390.1 Phypa1|30748,Phypa1|38627  
 AT1G78580.1,AT1G16980.1 Phypa1|27777,Phypa1|12  
 AT1G68020.2,AT1G06410.1,AT1G23870.1,AT4G17770.1  
 Phypa1|38822,Phypa1|11083,Phypa1|33422,Phypa1|37362  
 AT1G17000.1  
 AT4G27550.1  
 AT1G60140.1,AT2G18700.1,AT1G70290.1  
 AT4G28030.1 Phypa1|35648,Phypa1|26131  
 AT5G16300.1 Phypa1|404,Phypa1|11



Phypa1|9976  
AT1G24310.1 Phypa1|38489,Phypa1|28240  
AT2G33560.1 Phypa1|29644  
AT2G20635.1  
AT3G12280.1 Phypa1|403,Phypa1|27905  
Phypa1|15270  
AT2G19080.1 Phypa1|24218,Phypa1|39473  
AT1G04760.1,AT2G32670.1,AT2G33120.2,AT1G04750.1 Phypa1|24100,Phypa1|39374  
AT5G22360.1 Phypa1|26310,Phypa1|39402,Phypa1|37108  
AT2G33110.1  
AT3G24890.1  
AT3G54300.1  
AT4G15780.1  
AT4G32150.1,AT2G25340.1,AT5G11150.1  
Phypa1|39391,Phypa1|38721,Phypa1|37812  
Phypa1|28748  
AT3G07430.1,AT4G27990.1 Phypa1|29785,Phypa1|2157  
AT2G22890.1,AT1G62190.1,AT4G27030.1 Phypa1|1086  
AT5G30510.1 Phypa1|25651,Phypa1|25993  
Phypa1|22524  
AT2G01980.1 Phypa1|36038  
AT1G14660.1  
Phypa1|31887  
AT2G27970.1,AT2G27960.1 Phypa1|35985,Phypa1|32513  
AT1G03910.1 Phypa1|37847  
AT3G01480.1 Phypa1|39156,Phypa1|27267,Phypa1|34717  
AT5G13400.1 Phypa1|26817,Phypa1|27746  
AT2G26690.1,AT3G21670.1,AT1G12110.1 Phypa1|39550,Phypa1|37227  
AT1G68570.1 Phypa1|30524  
AT2G02040.1,AT2G02020.1,AT3G54140.1,AT1G62200.1  
AT5G01180.1  
AT4G21680.1  
AT2G38100.1  
AT1G33440.1,AT1G59740.1  
AT3G45710.1,AT3G45660.1,AT3G45720.1,AT3G45700.1,AT1G69870.1,AT3G45690.1,AT3G45680.1,AT3G45650.1  
AT1G18880.1,AT3G47960.1,AT5G62680.1,AT5G28470.1,AT1G69860.1  
AT1G52190.1,AT3G16180.1  
AT1G27080.1  
AT1G64530.1,AT4G24020.1 Phypa1|38376,Phypa1|1357,Phypa1|415,Phypa1|37191,Phypa1|39448  
AT2G43500.1,AT3G59580.1  
AT2G17150.1,AT1G20640.1,AT4G35270.1,AT1G76350.1  
AT4G38340.1  
Phypa1|38231,Phypa1|24931  
AT5G19070.1,AT1G03260.1 Phypa1|183,Phypa1|30577,Phypa1|25932  
AT4G23660.1 Phypa1|38905  
Phypa1|31319  
AT5G02080.1,AT1G12350.1 Phypa1|32600  
AT4G29120.1 Phypa1|26536  
AT1G71180.1,AT1G71170.1  
AT5G51010.1 Phypa1|24808  
AT2G25680.1 Phypa1|30161,Phypa1|38317  
AT1G80310.1  
AT4G12800.1 Phypa1|1561,Phypa1|25072,Phypa1|26009  
AT3G44370.1,AT1G65080.1 Phypa1|592  
AT4G15610.1,AT3G11550.1,AT5G06200.1,AT2G27370.1,AT2G36100.1,AT1G03700.1,AT5G15290.1,AT4G20390.1,AT4G03540.1,AT5G44550.1,AT3G06390.1,AT1G14160.1 Phypa1|24097,Phypa1|2813,Phypa1|24039  
AT4G25040.1  
AT2G22010.1 Phypa1|24699,Phypa1|400,Phypa1|6382  
AT5G10200.1 Phypa1|29244,Phypa1|37171  
AT5G43120.1  
AT3G50030.1  
AT5G43130.1,AT1G27720.1 Phypa1|34510  
AT2G47690.1,AT3G62790.1 Phypa1|24409,Phypa1|1310  
AT4G30220.1 Phypa1|29124,Phypa1|38574  
AT3G59810.1,AT2G43810.1 Phypa1|31979,Phypa1|39203  
AT2G38450.1,AT5G05360.1 Phypa1|17357  
AT5G54650.1,AT5G67470.1,AT3G05470.1,AT2G43800.1 Phypa1|31949  
AT5G48360.1,AT3G25500.1  
Phypa1|14572  
AT2G41490.1,AT3G57220.1 Phypa1|35195  
AT5G04500.1 Phypa1|37740,Phypa1|27796,Phypa1|36777  
AT5G22950.1 Phypa1|38861,Phypa1|37038  
AT3G45000.1  
Phypa1|27562  
AT5G40710.1,AT5G63280.1 Phypa1|14554,Phypa1|35575  
Phypa1|9365  
AT1G63110.1,AT1G12730.1 Phypa1|17464  
Phypa1|9575  
AT5G64090.1 Phypa1|34116  
AT5G21050.1  
AT2G39810.1 Phypa1|18408  
Phypa1|8471

Phypa1|26299  
 AT4G04780.1,AT1G33450.1,AT5G15690.1 Phypa1|38674  
 AT3G07950.1 Phypa1|25111,Phypa1|24053  
 AT2G16770.1,AT4G35040.1 Phypa1|1122  
 AT3G51960.2  
 AT4G18810.1 Phypa1|2426  
 AT2G45300.1,AT1G48860.1 Phypa1|2621,Phypa1|28135  
 AT5G47870.1 Phypa1|29417,Phypa1|29772  
 AT1G71310.1  
 AT1G19600.1 Phypa1|25695,Phypa1|25494  
 AT1G02890.1,AT1G62130.1,AT4G24860.1,AT4G02480.1,AT1G64110.2 Phypa1|2574,Phypa1|24514  
 AT3G19740.1,AT1G50140.1 Phypa1|24512,Phypa1|33175  
 AT4G28000.1  
 AT2G44860.1 Phypa1|781,Phypa1|39620  
 AT5G01460.1,AT3G08930.2 Phypa1|28410  
 Phypa1|25138  
 AT5G58100.1 Phypa1|38470  
 AT4G26860.1,AT1G11930.1 Phypa1|23750,Phypa1|36800  
 AT3G27610.1,AT2G01220.2 Phypa1|26438,Phypa1|36220  
 AT2G20510.1,AT2G36070.1 Phypa1|33005,Phypa1|28931  
 AT2G04350.1,AT1G77590.1 Phypa1|39759,Phypa1|28760  
 AT4G11030.1,AT1G64400.1,AT4G23850.1 Phypa1|37657,Phypa1|36491,Phypa1|27632  
 AT5G27600.1,AT3G05970.1 Phypa1|36045,Phypa1|6815,Phypa1|39696  
 AT1G49430.1  
 AT2G47240.1  
 Phypa1|2539  
 Phypa1|27711  
 AT3G49410.1,AT5G24450.1 Phypa1|27952  
 AT5G14460.1 Phypa1|34287  
 Phypa1|23317  
 AT1G68310.1 Phypa1|27184  
 AT3G09380.1  
 AT3G13120.1 Phypa1|27872,Phypa1|27507,Phypa1|24774  
 AT4G21540.1 Phypa1|29789,Phypa1|25272  
 AT1G04070.1,AT5G43970.1 Phypa1|1301,Phypa1|353  
 AT3G58180.1 Phypa1|27025  
 AT3G43260.1  
 AT3G62530.1  
 AT2G33220.1,AT1G04630.1 Phypa1|24028,Phypa1|32657  
 AT4G14540.1,AT5G47640.1 Phypa1|19028  
 AT1G21970.1,AT5G47670.1  
 AT2G13570.1  
 AT2G38880.1,AT2G37060.1,AT3G53340.1  
 AT2G47810.1  
 Phypa1|2326,Phypa1|1580  
 Phypa1|2327  
 Phypa1|1200,Phypa1|25410  
 AT5G06130.2,AT5G61670.1 Phypa1|39667  
 Phypa1|17436  
 AT5G09650.1 Phypa1|29113,Phypa1|27720  
 Phypa1|30574  
 AT5G40610.1 Phypa1|36998  
 AT2G24820.1 Phypa1|24854,Phypa1|37360  
 AT5G63440.2 Phypa1|39027,Phypa1|24504  
 Phypa1|220  
 AT1G22700.1 Phypa1|29704,Phypa1|21936  
 AT2G44160.1,AT3G59970.3 Phypa1|39779,Phypa1|32383  
 AT5G06350.1,AT5G27010.1 Phypa1|4021  
 AT4G04680.1  
 AT5G44740.2 Phypa1|27744  
 Phypa1|33284  
 AT4G30430.1,AT4G28050.1,AT2G23810.1 Phypa1|2991,Phypa1|28809,Phypa1|32108,Phypa1|35924  
 AT1G18520.1,AT5G23030.1  
 AT2G03840.1  
 AT5G60220.1,AT3G45600.1  
 AT1G63260.1  
 AT3G12090.1  
 AT2G19580.1,AT5G46700.1  
 AT5G57810.1  
 AT4G23410.1  
 AT3G20630.1 Phypa1|30893  
 Phypa1|35601  
 AT1G05180.1,AT2G32410.1 Phypa1|38807,Phypa1|36887  
 AT3G25880.1  
 AT3G55220.1,AT3G55200.1 Phypa1|16114,Phypa1|34495,Phypa1|39675  
 AT5G55760.1 Phypa1|29625  
 Phypa1|14050,Phypa1|21912  
 Phypa1|35535  
 AT3G45180.1 Phypa1|39662  
 AT5G42300.1  
 AT1G51260.1,AT3G57650.1 Phypa1|26842,Phypa1|4782  
 AT5G60700.1 Phypa1|24358

Phypa1|38366,Phypa1|24959  
AT5G13200.1 Phypa1|1098,Phypa1|1117  
AT4G40100.1,AT1G28200.1,AT2G22475.1  
AT5G23350.1,AT4G01600.1,AT5G23370.1,AT5G08350.1,AT5G23360.1  
AT1G65650.1 Phypa1|36096  
AT5G16310.1  
AT4G17510.1 Phypa1|28165  
AT3G54860.1 Phypa1|23744  
AT3G16310.1 Phypa1|21600,Phypa1|28569  
Phypa1|12417  
AT1G24050.1 Phypa1|38509,Phypa1|24400  
AT2G24500.1,AT4G31420.2 Phypa1|24707,Phypa1|29598  
AT2G39080.1 Phypa1|34819,Phypa1|36944  
AT5G47680.1 Phypa1|591,Phypa1|155  
AT1G29820.1,AT2G42950.1,AT1G29830.1 Phypa1|27092,Phypa1|36828,Phypa1|25553  
AT5G28350.1,AT3G61480.1 Phypa1|36340,Phypa1|38187  
AT2G36320.1,AT1G51200.1  
Phypa1|37206,Phypa1|26269,Phypa1|35021,Phypa1|2159,Phypa1|37272,Phypa1|23734  
AT1G12440.1,AT2G27580.1,AT4G12040.1,AT4G22820.1  
AT4G14225.1  
AT3G52800.1  
AT4G25380.1  
AT3G12630.1  
AT4G38225.3 Phypa1|31639,Phypa1|26663  
AT1G55460.1 Phypa1|36145  
AT5G51795.1  
AT4G13750.1 Phypa1|39394  
AT1G78910.1,AT3G19440.1 Phypa1|25924  
AT4G36210.1,AT2G18100.1 Phypa1|15379,Phypa1|20648  
Phypa1|416  
AT1G67660.1 Phypa1|36198  
AT1G13810.1  
AT3G16785.1 Phypa1|21443  
Phypa1|37058  
AT4G19000.1,AT1G32130.1 Phypa1|27409  
AT3G48820.1 Phypa1|30787  
AT1G08660.1 Phypa1|29005  
AT2G20060.1 Phypa1|37387  
Phypa1|31412  
AT3G18030.1,AT1G48605.1 Phypa1|24618,Phypa1|39533  
AT5G50210.1 Phypa1|25245,Phypa1|26820  
AT1G67810.1  
AT1G56420.1 Phypa1|747  
AT1G12530.1  
AT1G73650.3,AT1G18180.1 Phypa1|39024,Phypa1|39077  
Phypa1|26758  
AT5G07370.1,AT5G61760.1 Phypa1|36268  
AT4G05000.1,AT4G21560.1 Phypa1|36333,Phypa1|23834  
AT5G42890.1 Phypa1|38299  
AT5G48840.1 Phypa1|36122  
Phypa1|30585  
AT5G35730.1,AT2G32295.1 Phypa1|26678,Phypa1|39071  
AT4G14385.1 Phypa1|38031,Phypa1|28685  
AT1G49880.1 Phypa1|24353  
Phypa1|28626  
AT2G34357.1 Phypa1|4104  
AT4G23540.1  
AT5G03690.1,AT4G26530.1,AT2G36460.1,AT3G52930.1 Phypa1|33739,Phypa1|36918  
AT2G01140.1 Phypa1|25693,Phypa1|29703,Phypa1|28616,Phypa1|30834  
AT4G26520.1  
AT4G38970.1,AT2G21330.1  
Phypa1|26931,Phypa1|2608  
Phypa1|26266  
AT2G37690.1 Phypa1|37241  
AT2G05140.1  
Phypa1|31450  
AT5G55220.1 Phypa1|36190,Phypa1|26554  
Phypa1|23417  
AT1G20816.1,AT1G76405.2 Phypa1|11354,Phypa1|24255  
AT2G27490.1 Phypa1|36280  
Phypa1|31390  
AT5G41760.1 Phypa1|39396  
AT4G35335.1  
AT4G38260.1 Phypa1|39576  
AT1G20680.1,AT1G20740.1  
AT2G26500.1 Phypa1|25021,Phypa1|29542  
AT4G39235.1,AT3G05570.1,AT2G21640.1 Phypa1|872  
AT1G64030.1,AT1G62170.1,AT1G47710.1,AT2G26390.1,AT3G45220.1,AT2G35580.1,AT2G25240.1,AT2G14540.1  
Phypa1|23876,Phypa1|25307,Phypa1|38094,Phypa1|26567  
AT1G63280.1,AT1G51330.1  
AT1G64010.1  
AT5G15770.1 Phypa1|38462

AT5G60620.1 Phypa1|28144  
Phypa1|14309  
AT4G10180.1 Phypa1|37718,Phypa1|27032,Phypa1|2993  
AT5G58110.1 Phypa1|29352,Phypa1|26018  
AT4G30000.1,AT1G69190.1 Phypa1|26400  
Phypa1|23396  
AT2G03870.1 Phypa1|37526,Phypa1|38488  
Phypa1|39186  
AT3G14080.1,AT1G19120.1 Phypa1|28198,Phypa1|32787  
AT1G05730.1,AT2G31725.1,AT1G05740.1,AT2G43720.1 Phypa1|33315  
AT3G21865.1 Phypa1|36222,Phypa1|36221  
AT2G01620.1 Phypa1|26232  
AT3G27290.1,AT3G26000.1  
AT3G12590.1 Phypa1|30401  
AT3G08950.1 Phypa1|27766  
AT4G39740.1  
AT1G15760.1,AT2G12462.1,AT1G80520.1 Phypa1|16834  
AT1G25350.1 Phypa1|2618  
AT5G19720.1  
AT5G58410.1 Phypa1|32585  
AT3G61140.1 Phypa1|37927,Phypa1|36307  
AT3G12850.1  
AT5G51340.1 Phypa1|28183,Phypa1|37396  
Phypa1|6042  
AT5G09690.2,AT5G64560.1 Phypa1|26939  
AT4G28580.1,AT3G58970.1 Phypa1|36602,Phypa1|30652,Phypa1|24338  
AT3G19640.1 Phypa1|35903,Phypa1|13613  
AT1G80900.1,AT1G16010.1 Phypa1|21699,Phypa1|39709  
AT5G09710.1  
AT5G09720.1  
AT2G03620.1  
Phypa1|28263  
ATCG01110.1 Phypa1|3090  
ATMG00510.1 Phypa1|2840  
AT3G24090.1 Phypa1|39112,Phypa1|2996  
Phypa1|30493  
AT1G72550.1 Phypa1|36767,Phypa1|25262  
AT5G58250.1 Phypa1|25868,Phypa1|28930,Phypa1|25435  
AT2G41770.1,AT3G57420.1 Phypa1|26641,Phypa1|36334  
AT1G75460.1,AT1G19740.1 Phypa1|38343  
AT5G35220.1 Phypa1|34512,Phypa1|30980,Phypa1|25696  
Phypa1|32725  
AT5G53160.2,AT1G01360.1,AT4G01026.1,AT4G27920.1  
Phypa1|31501,Phypa1|39403,Phypa1|27391,Phypa1|38610,Phypa1|38862  
AT5G45870.1,AT5G45860.1,AT2G40330.1,AT4G18620.1  
AT2G38310.1,AT5G05440.1  
AT1G73000.1,AT5G46790.1,AT4G17870.1,AT2G26040.1  
Phypa1|37684  
AT2G23960.1,AT4G30530.1,AT4G30550.1,AT4G30540.1,AT2G23970.1 Phypa1|15647  
AT4G25120.1 Phypa1|896  
AT3G53120.1,AT2G36680.1 Phypa1|9749,Phypa1|30636,Phypa1|34854,Phypa1|26745  
AT1G61620.1 Phypa1|24010,Phypa1|37781  
AT4G11120.1 Phypa1|26468,Phypa1|37181,Phypa1|37779  
Phypa1|31138  
AT5G05670.1,AT2G18770.1 Phypa1|28926  
AT4G31040.1 Phypa1|34075,Phypa1|1857  
AT1G06950.1 Phypa1|39773,Phypa1|36226  
AT1G30380.1 Phypa1|2445,Phypa1|1241  
Phypa1|24595  
AT5G42320.1 Phypa1|1886  
AT3G17910.1,AT1G48510.1 Phypa1|26035  
AT2G30570.1 Phypa1|23977,Phypa1|386,Phypa1|26824,Phypa1|26811  
AT3G19900.1 Phypa1|25579,Phypa1|28257  
AT5G43430.1 Phypa1|38265  
Phypa1|23343,Phypa1|30488,Phypa1|31284  
AT1G10840.1 Phypa1|29267,Phypa1|29325  
Phypa1|17308  
AT4G24750.1 Phypa1|28355,Phypa1|36087  
AT3G08920.1 Phypa1|39432  
AT3G10350.1 Phypa1|37895,Phypa1|26810  
AT5G60730.1  
AT1G74530.3 Phypa1|27413  
AT4G21700.1 Phypa1|25257  
AT5G47380.1 Phypa1|7931,Phypa1|30641  
AT3G13000.2,AT1G16750.1 Phypa1|24640,Phypa1|30380,Phypa1|24342,Phypa1|25273  
AT2G23700.1  
AT3G18900.1,AT5G66600.1  
AT1G76620.1,AT1G43020.1,AT1G21060.1  
AT3G12540.1,AT2G39690.1,AT5G60720.1  
Phypa1|36327,Phypa1|38114,Phypa1|8580  
Phypa1|6923  
Phypa1|14044

AT1G66080.1 Phypa1|17588,Phypa1|32965  
Phypa1|28182,Phypa1|26182  
AT5G61500.1 Phypa1|36668  
AT3G17810.1 Phypa1|7485,Phypa1|29791  
AT1G09815.1 Phypa1|319  
AT1G73430.1 Phypa1|36610,Phypa1|27017  
AT4G15802.1 Phypa1|1707,Phypa1|1706  
AT4G26770.1,AT4G22340.3,AT1G62430.1 Phypa1|38945  
AT2G16500.1,AT4G34710.1 Phypa1|36433,Phypa1|36080  
Phypa1|34093  
ATCG00470.1 Phypa1|31050,Phypa1|31475  
AT3G59890.1,AT2G44040.1 Phypa1|39270  
AT1G61780.1 Phypa1|36284  
Phypa1|861  
AT3G29170.1 Phypa1|842,Phypa1|1262,Phypa1|843  
AT5G40660.1 Phypa1|39621  
AT5G06120.1 Phypa1|30621,Phypa1|39170  
AT2G39020.1,AT2G39030.1 Phypa1|29105  
Phypa1|29299  
AT4G36195.1,AT2G18080.1,AT4G36190.1 Phypa1|39761  
AT1G43890.1,AT5G03530.1  
Phypa1|8689,Phypa1|36536,Phypa1|32062,Phypa1|2543,Phypa1|26828,Phypa1|35456  
AT2G22290.1,AT4G39890.1 Phypa1|19880,Phypa1|31793,Phypa1|2491,Phypa1|30786,Phypa1|30242  
AT3G54840.1 Phypa1|2485,Phypa1|36395,Phypa1|27407  
AT2G43130.1,AT2G31680.1,AT3G07410.1,AT1G05810.1 Phypa1|1147,Phypa1|37832,Phypa1|37998,Phypa1|34200  
AT5G45130.1,AT4G19640.1 Phypa1|37785,Phypa1|37121  
AT5G59150.1,AT1G07410.1,AT3G46830.1  
Phypa1|37379,Phypa1|36227,Phypa1|39342,Phypa1|36181,Phypa1|36883  
AT4G17170.1,AT4G35860.1 Phypa1|38686,Phypa1|37643,Phypa1|37550,Phypa1|39618  
AT4G17530.1,AT1G02130.1,AT5G47200.1 Phypa1|36963,Phypa1|36946  
AT1G52280.1,AT3G16100.1 Phypa1|38671,Phypa1|23913,Phypa1|24252  
AT5G03520.1,AT5G59840.1,AT3G53610.1,AT3G09900.1,AT3G46060.1  
Phypa1|39370,Phypa1|38981,Phypa1|36913,Phypa1|38820,Phypa1|38819  
AT5G47960.1,AT3G12160.1 Phypa1|23791,Phypa1|34571,Phypa1|23698  
AT3G09910.1  
AT5G10260.1,AT2G44610.1  
AT5G47520.1  
AT1G28550.1,AT4G18800.1,AT1G06400.1,AT2G33870.1,AT4G18430.1,AT1G16920.1,AT3G15060.1,AT5G45750.1,AT5G60860.1  
AT1G09630.1  
AT1G73640.1,AT1G18200.1  
AT4G08190.1  
AT4G07524.1  
AT5G46025.1  
AT4G17160.1  
AT3G11730.1  
AT3G18820.1,AT1G49300.1  
AT5G39620.1,AT4G09720.1,AT1G22740.1,AT2G21880.1  
AT4G39990.1,AT5G65270.1  
AT1G01200.1  
Phypa1|26570,Phypa1|26914,Phypa1|29739,Phypa1|33516,Phypa1|26558  
Phypa1|29006  
Phypa1|233  
Phypa1|34625  
Phypa1|32252  
Phypa1|9293  
AT3G42950.1,AT1G19170.1 Phypa1|33100  
AT3G62110.1 Phypa1|32038,Phypa1|1860,Phypa1|29800,Phypa1|37542,Phypa1|985  
AT5G41870.1,AT4G33440.1,AT4G23820.1  
AT5G49215.1,AT3G06770.2,AT3G16850.1  
AT3G61490.1,AT3G48950.1,AT4G23500.1,AT2G23900.1  
AT5G62790.1 Phypa1|26592,Phypa1|26866  
Phypa1|31136  
AT4G18590.1,AT3G52630.1 Phypa1|38344  
AT3G16190.1 Phypa1|24194  
AT1G50940.1 Phypa1|37594  
Phypa1|30478  
Phypa1|16454  
Phypa1|30866  
AT5G64816.1 Phypa1|15204,Phypa1|17612  
AT1G75140.1,AT1G19370.1 Phypa1|25652,Phypa1|25987  
AT3G57400.1,AT5G52500.1 Phypa1|32130,Phypa1|1054,Phypa1|585,Phypa1|150  
Phypa1|34439  
AT1G64520.1 Phypa1|36727,Phypa1|32824  
AT5G42040.1  
AT3G14830.1,AT1G53450.1 Phypa1|36214  
AT3G10890.1,AT3G10900.1,AT5G66460.1,AT5G01930.1  
Phypa1|1008,Phypa1|26002,Phypa1|38106,Phypa1|28706,Phypa1|2643  
AT3G30540.1  
AT2G20680.1,AT4G28320.1  
AT1G02310.1  
Phypa1|35961,Phypa1|27752,Phypa1|25308

Phypa1|33469  
AT1G04635.1 Phypa1|24171  
AT2G11890.1 Phypa1|35422,Phypa1|34954  
AT1G31660.1 Phypa1|27936  
Phypa1|8465,Phypa1|33072  
AT4G39160.1 Phypa1|32013,Phypa1|35625  
AT4G33590.1,AT4G33600.1 Phypa1|513  
Phypa1|2266,Phypa1|27083  
AT3G13420.1,AT1G55535.1 Phypa1|681,Phypa1|4131,Phypa1|1119  
AT1G20575.1 Phypa1|15590  
Phypa1|8279  
Phypa1|27531  
AT5G13570.1 Phypa1|30266,Phypa1|26294,Phypa1|26508  
AT2G42070.1 Phypa1|27311  
Phypa1|6010  
AT5G25940.1 Phypa1|330,Phypa1|849  
AT4G35760.1 Phypa1|26412  
Phypa1|2232  
AT1G29060.1,AT4G14600.1 Phypa1|38851  
AT5G07020.1 Phypa1|34596,Phypa1|35710  
AT3G04820.1 Phypa1|25221  
AT1G32210.1,AT2G35520.2 Phypa1|7996,Phypa1|39744  
Phypa1|27390  
AT5G55230.1,AT4G26760.1 Phypa1|28094,Phypa1|464,Phypa1|28095,Phypa1|28365,Phypa1|24879  
AT3G60840.1,AT5G62250.1,AT5G51600.1  
AT2G38720.1  
AT1G27920.1  
AT2G01910.1,AT1G14690.1  
AT2G30115.1  
Phypa1|4508  
AT1G71750.1 Phypa1|24775  
AT4G34270.1 Phypa1|38705  
AT3G27325.1 Phypa1|36970,Phypa1|1753,Phypa1|27817  
AT5G27380.1 Phypa1|25519  
AT3G03420.1 Phypa1|5108,Phypa1|30523  
AT3G52090.1 Phypa1|25843,Phypa1|35971  
AT1G22800.1 Phypa1|28886  
AT1G72960.1,AT3G13870.1,AT5G45160.1 Phypa1|37225,Phypa1|39670  
Phypa1|38452  
Phypa1|29216  
AT5G61770.3 Phypa1|38339  
AT1G27385.1 Phypa1|2171,Phypa1|2172  
AT5G12960.1,AT5G12950.1 Phypa1|26538  
AT2G02570.1 Phypa1|27007,Phypa1|33082,Phypa1|26307  
AT3G20650.1 Phypa1|26241  
AT2G13440.1 Phypa1|24556  
AT3G52610.1 Phypa1|30276,Phypa1|36297,Phypa1|29932  
Phypa1|35876  
AT4G20850.1 Phypa1|29856,Phypa1|24424  
Phypa1|21816,Phypa1|21756  
AT1G18335.1 Phypa1|27437,Phypa1|1106  
AT5G53810.1,AT1G21100.1,AT1G33030.1,AT1G77520.1,AT1G77530.1,AT1G21130.1,AT1G76790.1,AT1G63140.2,AT1G21110.1,AT1G21120.1,AT1G51990.1,AT5G54160.1 Phypa1|36601  
AT1G62900.1  
AT3G53140.1  
Phypa1|36031  
AT2G19940.1 Phypa1|27501,Phypa1|28073  
Phypa1|31448  
AT1G51650.1 Phypa1|24191,Phypa1|24253  
Phypa1|2219  
AT3G13330.1 Phypa1|34294  
Phypa1|27093  
AT5G23300.1 Phypa1|6435  
Phypa1|22056  
Phypa1|37870  
AT5G23710.1 Phypa1|31796  
AT4G00755.1 Phypa1|38908,Phypa1|32444,Phypa1|5696  
AT3G03305.1 Phypa1|427,Phypa1|28749  
Phypa1|32742  
AT5G58160.1,AT1G31810.1,AT2G25050.1 Phypa1|6  
AT5G07780.1,AT1G42980.1,AT3G32400.1,AT5G07760.1,AT5G07650.1  
AT3G32410.1  
AT5G07770.1  
Phypa1|34335  
Phypa1|31831  
AT4G01560.1 Phypa1|28153  
AT2G26680.1 Phypa1|33588  
AT4G26900.1 Phypa1|38544  
Phypa1|3102  
AT1G72770.1,AT5G57050.1,AT4G26080.1,AT1G17550.1 Phypa1|488,Phypa1|1416  
AT5G51760.1,AT5G59220.1,AT1G07430.1,AT2G29380.1,AT3G11410.1  
AT4G11040.1

AT1G17545.1  
AT5G05000.1,AT1G02280.1 Phypa1|26369,Phypa1|36776  
AT3G16620.1,AT2G16640.1 Phypa1|39093,Phypa1|39038,Phypa1|37247,Phypa1|37161  
AT4G02510.1  
AT4G15810.1  
AT4G02482.1  
AT5G20300.1  
Phypa1|24675  
AT4G26640.2,AT2G03340.1 Phypa1|571,Phypa1|1150,Phypa1|626  
AT5G49520.1,AT4G18170.1,AT2G47260.1,AT4G39410.1,AT1G69310.1,AT2G44745.1,AT3G01970.1,AT1G29860.1,AT3G62340.1,AT5G46350.1  
Phypa1|2213,Phypa1|28171,Phypa1|28433,Phypa1|25811,Phypa1|803,Phypa1|804,Phypa1|2387,Phypa1|359,Phypa1|29290,Phypa1|2217,Phypa1|25949,Phypa1|26875,Phypa1|25426,Phypa1|30558  
AT3G04670.1,AT5G28650.1,AT2G30590.1 Phypa1|38694,Phypa1|23675,Phypa1|28501,Phypa1|26215  
AT1G68150.1 Phypa1|28424  
AT2G37260.1,AT1G13960.1,AT2G38470.1,AT2G30250.1,AT5G56270.1,AT2G04880.1,AT1G55600.1  
AT4G26440.1,AT3G01080.1,AT4G30935.1,AT5G07100.1  
AT1G64000.1,AT5G41570.1,AT5G13080.1,AT2G46130.1  
AT5G22570.1,AT1G66550.1,AT1G66560.1  
AT5G43290.1  
AT5G26170.1  
AT5G52830.1,AT2G34830.1,AT4G23550.1,AT1G30650.1,AT4G01250.1,AT3G58710.1,AT1G29280.1  
AT5G45270.1,AT5G24110.1  
AT4G11070.1,AT4G23810.1,AT2G40740.1  
AT2G24570.1,AT2G23320.1,AT4G31550.1,AT4G24240.1  
AT4G31800.1,AT1G80840.1  
Phypa1|296  
Phypa1|26056  
Phypa1|1320  
AT1G79730.1 Phypa1|1858  
AT3G04860.1,AT5G28150.1 Phypa1|37195,Phypa1|37332  
AT5G11000.1,AT2G25200.1  
AT5G48270.1,AT4G12690.1,AT2G04220.1  
AT2G27770.1,AT2G36470.1  
AT3G13229.1  
AT5G04460.1 Phypa1|35098  
AT2G27950.1  
AT2G21440.1 Phypa1|38155  
AT1G78915.1 Phypa1|27342  
AT2G43490.1,AT3G59570.1 Phypa1|30214  
AT5G16800.2,AT3G02980.1 Phypa1|36890,Phypa1|1131  
AT1G58100.1,AT3G47620.1,AT1G69690.1 Phypa1|33243,Phypa1|35536,Phypa1|19900,Phypa1|35791  
AT5G51910.1,AT2G45680.1  
AT2G37000.1,AT3G27010.1,AT1G72010.1  
AT1G35560.1  
AT3G45150.1,AT5G41030.1  
AT5G08330.1,AT5G23280.1  
AT1G18320.1,AT3G10110.1 Phypa1|756  
AT2G46180.1,AT3G61570.1 Phypa1|1932,Phypa1|1937  
AT4G01400.1 Phypa1|36704  
AT1G61800.1,AT5G54800.1 Phypa1|26788,Phypa1|1929,Phypa1|34080,Phypa1|28795  
AT5G33320.1 Phypa1|2278  
AT5G46110.1 Phypa1|30716,Phypa1|39737  
AT5G17630.1  
AT4G03950.1  
AT3G01550.1  
AT1G43310.1  
Phypa1|35915  
Phypa1|1031  
AT4G27760.1,AT5G53100.1,AT5G53090.1 Phypa1|27484,Phypa1|32581  
AT5G05540.1,AT5G67240.1,AT3G50090.1,AT3G50100.1 Phypa1|32417  
AT5G25800.1 Phypa1|24425,Phypa1|26134  
Phypa1|16481  
AT5G18700.1 Phypa1|27939,Phypa1|30272  
AT1G33940.1  
Phypa1|34636  
AT2G34970.1,AT3G02270.1,AT4G18300.1 Phypa1|1764  
AT1G80360.1 Phypa1|24782  
AT4G02580.1 Phypa1|36377,Phypa1|23870  
AT1G73720.1 Phypa1|38426,Phypa1|37253  
AT1G15440.1 Phypa1|38850  
Phypa1|4568  
AT3G18524.1 Phypa1|39450  
Phypa1|5116  
AT5G05380.1,AT3G56110.1,AT5G01640.1,AT2G40380.1,AT5G07110.1,AT2G38360.1  
Phypa1|25569,Phypa1|39052,Phypa1|24153,Phypa1|37777  
AT1G55640.1,AT1G55190.1,AT5G56230.1  
AT3G13720.1,AT1G08770.1,AT1G17700.1,AT3G13710.1  
AT1G04260.1  
AT4G29658.1  
AT1G73960.1 Phypa1|28757,Phypa1|15015  
AT5G17440.1,AT3G03340.1 Phypa1|30530,Phypa1|27209

AT5G49400.1 Phypa1|32499  
     Phypa1|8197  
 AT5G05210.1 Phypa1|7052  
 AT2G27750.1  
 AT5G41020.1 Phypa1|34233  
 AT3G26670.1 Phypa1|36966,Phypa1|36353  
 AT3G28880.1 Phypa1|2316,Phypa1|27896  
     Phypa1|10136  
 AT1G20370.1,AT1G76120.1 Phypa1|37881  
     Phypa1|15381  
 AT3G59410.1 Phypa1|28443  
 AT4G12610.1 Phypa1|2249  
 AT4G32620.1 Phypa1|10207,Phypa1|31755  
 AT1G69070.1 Phypa1|36545  
 AT5G64910.1,AT5G10010.1 Phypa1|28943,Phypa1|27547  
 AT2G47900.1 Phypa1|2773,Phypa1|29044,Phypa1|37353,Phypa1|39380,Phypa1|39379  
 AT1G61940.1  
 AT2G18280.1  
 AT5G18680.1,AT3G06380.1  
 AT1G76900.1,AT1G25280.1,AT1G43640.1  
 AT1G47270.1  
 AT1G53320.1  
 AT5G63880.1,AT5G09260.1 Phypa1|3053  
 AT1G20570.1,AT1G80260.1 Phypa1|8560  
 AT5G17410.2 Phypa1|27874,Phypa1|29167,Phypa1|37617  
 AT5G40270.1,AT5G40290.1 Phypa1|37538  
 AT4G16760.1,AT2G35690.1 Phypa1|39343  
 AT2G45530.1 Phypa1|19287,Phypa1|24527  
 AT3G23920.1 Phypa1|25352,Phypa1|39405,Phypa1|19307,Phypa1|37053  
 AT4G00490.1 Phypa1|23917  
 AT5G18670.1,AT4G17090.1  
 AT5G55700.1  
 AT5G45300.1,AT2G45880.1  
 AT2G32290.1  
     Phypa1|25150  
     Phypa1|36010  
 AT2G31260.1 Phypa1|26487,Phypa1|29369  
 AT3G02260.1 Phypa1|26044,Phypa1|38430  
 AT5G56020.1,AT4G26550.1 Phypa1|31716,Phypa1|221  
 AT4G36890.1,AT5G67230.1 Phypa1|1404,Phypa1|26970,Phypa1|1437  
 AT1G29260.1 Phypa1|27900,Phypa1|39678  
 AT2G19540.1 Phypa1|26164  
 AT4G12620.1,AT4G14700.1 Phypa1|27276  
 AT5G26820.1 Phypa1|29082,Phypa1|29114,Phypa1|29080  
 AT1G49350.1 Phypa1|38935  
 AT2G47790.1 Phypa1|24870,Phypa1|37134,Phypa1|31771  
 AT1G67500.1 Phypa1|29564  
 AT3G48260.1 Phypa1|42  
 AT5G28080.2,AT3G04910.1,AT3G22420.2  
 AT3G51630.1,AT5G58350.1  
 AT3G18750.1,AT5G41990.1,AT1G49160.2  
 AT5G55560.1  
 AT1G64630.1  
 AT5G38460.1 Phypa1|29768  
 AT3G04650.1 Phypa1|25445  
 AT4G29380.1 Phypa1|29050,Phypa1|37006  
 AT3G62500.1,AT5G36000.1,AT3G61730.1 Phypa1|30389  
 AT3G12080.1 Phypa1|27893  
     Phypa1|31245  
 AT4G12780.1,AT1G75100.1,AT1G75310.1,AT4G12770.1 Phypa1|879,Phypa1|379,Phypa1|880,Phypa1|881  
 AT1G21660.1,AT1G30280.1  
     Phypa1|21079  
 AT2G15430.1,AT2G15400.1 Phypa1|26989  
     Phypa1|27331  
 AT2G21620.2 Phypa1|39078  
 AT5G48630.1,AT5G48640.1 Phypa1|5329,Phypa1|30646  
 AT4G03430.1 Phypa1|39354,Phypa1|38280  
 AT2G47450.1 Phypa1|556  
 AT1G02640.1,AT3G19620.1,AT5G49360.1,AT5G09730.1,AT5G64570.1 Phypa1|30550,Phypa1|37549  
 AT1G78060.1,AT5G10560.1  
 AT5G09700.1  
     Phypa1|23541  
     Phypa1|23385  
     Phypa1|23274  
 AT3G21280.1,AT1G51710.1 Phypa1|38536  
     Phypa1|6648  
 AT4G19610.1 Phypa1|38534  
 AT5G05720.1  
 AT5G01800.1,AT3G51730.1 Phypa1|709,Phypa1|714  
 AT5G27720.1 Phypa1|25851  
     Phypa1|25513  
 AT5G66420.2 Phypa1|38210



Phypa1|14573  
Phypa1|30812  
AT4G29060.1 Phypa1|26888,Phypa1|948,Phypa1|33352  
AT5G62530.1 Phypa1|38531  
AT1G70060.1,AT1G24190.1,AT5G15020.1,AT3G01320.1  
Phypa1|37021,Phypa1|1752,Phypa1|39355,Phypa1|30287,Phypa1|5  
AT1G10450.1,AT1G59890.1 Phypa1|1754  
AT3G24260.1  
AT1G27250.1  
AT1G24210.1,AT1G27240.1  
AT1G27220.1  
AT1G24250.1,AT5G15030.1,AT1G23810.1,AT1G24230.1,AT1G70030.1,AT1G27270.1  
AT1G27280.1,AT1G24200.1,AT1G27260.1,AT1G24220.1  
AT5G35610.1  
AT1G10250.1  
AT5G15040.1  
Phypa1|307  
AT3G01200.1,AT4G21210.1 Phypa1|39040  
Phypa1|31122  
AT3G20330.1 Phypa1|29316,Phypa1|25908  
Phypa1|30775  
AT5G57950.1 Phypa1|25057,Phypa1|25771  
AT5G15680.1 Phypa1|13538,Phypa1|30545,Phypa1|24296  
AT5G35080.1 Phypa1|36175,Phypa1|1073  
AT2G19385.1 Phypa1|3169  
AT1G60550.1 Phypa1|28647  
AT1G16810.1 Phypa1|26460  
Phypa1|1725  
AT3G44110.1,AT5G22060.1 Phypa1|28651,Phypa1|27478,Phypa1|36129,Phypa1|30195  
AT3G62600.1 Phypa1|37885,Phypa1|38884  
Phypa1|28648  
Phypa1|1305  
AT1G23360.1 Phypa1|28579  
AT4G25970.1,AT5G57190.1 Phypa1|28791  
Phypa1|30439  
AT3G23980.1 Phypa1|25120,Phypa1|4424,Phypa1|1884  
AT2G43560.1 Phypa1|28208  
Phypa1|231  
AT5G12190.1 Phypa1|38676  
AT2G14870.1  
AT3G04500.1 Phypa1|28393  
Phypa1|4304  
AT1G43190.1 Phypa1|26213,Phypa1|38490  
AT2G20420.1 Phypa1|23691  
AT5G26680.1 Phypa1|38125,Phypa1|38515  
AT4G37930.1,AT5G26780.3 Phypa1|26993,Phypa1|25274  
AT4G32520.1 Phypa1|28668,Phypa1|34398  
AT4G13890.1,AT4G13930.1 Phypa1|37872  
AT1G22020.1,AT1G36370.1 Phypa1|39316,Phypa1|37697  
Phypa1|6529  
Phypa1|2401  
Phypa1|31368  
Phypa1|23318  
Phypa1|6429  
Phypa1|2685  
AT3G18430.1 Phypa1|39348  
AT2G20650.1 Phypa1|36152,Phypa1|30322  
AT4G28370.1  
AT4G15010.1 Phypa1|34829  
AT4G12570.1 Phypa1|28964,Phypa1|28285  
AT1G77122.1 Phypa1|33747  
AT1G69210.1  
AT4G13870.2 Phypa1|17691  
AT3G08505.1 Phypa1|28369  
AT5G28490.1,AT2G31160.1,AT3G04510.1 Phypa1|2118,Phypa1|2113,Phypa1|2329,Phypa1|2314  
AT1G16910.1,AT4G18610.1,AT5G58500.1,AT1G78815.1,AT1G07090.1,AT2G42610.1  
AT3G23290.1  
AT2G46580.1 Phypa1|39068  
AT1G19880.1 Phypa1|24827  
AT3G61415.1,AT2G45950.1 Phypa1|28017  
AT3G20740.1 Phypa1|3083  
AT5G08630.1 Phypa1|36184,Phypa1|2982  
AT4G01270.1 Phypa1|21059  
AT4G01245.1  
AT1G47750.1 Phypa1|10855  
AT3G47430.1 Phypa1|36118,Phypa1|37394,Phypa1|25427  
AT1G73885.1 Phypa1|35479  
ATCG01040.1 Phypa1|30785  
AT3G20390.1 Phypa1|25864  
Phypa1|20537  
Phypa1|31490  
AT5G40740.1 Phypa1|18734,Phypa1|34210,Phypa1|31817

AT4G16570.1 Phypa1|30650  
AT5G52200.1 Phypa1|9726,Phypa1|33487  
AT3G58050.1,AT2G41960.1 Phypa1|26339,Phypa1|28879  
AT4G32840.1,AT4G29220.1,AT5G61580.1,AT4G26270.1,AT5G56630.1  
Phypa1|28025,Phypa1|26746,Phypa1|36856,Phypa1|29717,Phypa1|30102  
AT2G22480.1 Phypa1|38983,Phypa1|11424  
AT5G47810.1  
Phypa1|29260,Phypa1|28893  
AT2G17510.1 Phypa1|10627  
AT4G21180.1,AT1G79940.1 Phypa1|34948  
AT2G42750.1 Phypa1|1074,Phypa1|1994  
AT3G56990.1 Phypa1|28327  
AT5G09380.1,AT4G25180.1 Phypa1|32323  
AT1G51110.1 Phypa1|32937  
AT5G66840.1 Phypa1|35739  
Phypa1|5746  
AT1G66650.1,AT1G66630.1,AT5G37870.1,AT5G37930.1,AT5G62800.1 Phypa1|1109,Phypa1|1100  
AT4G27880.1,AT3G61790.1 Phypa1|38478,Phypa1|38973  
AT3G13672.2,AT3G58040.1  
AT2G41980.1  
AT5G53360.1  
AT5G04920.1 Phypa1|30151  
AT2G39340.1 Phypa1|38080,Phypa1|39020  
AT3G14120.1 Phypa1|38985  
AT5G52380.1 Phypa1|199  
AT2G12880.1  
AT4G35520.1 Phypa1|3969  
AT1G05970.2 Phypa1|4414,Phypa1|32876  
AT5G19730.1 Phypa1|27814  
AT5G04960.1,AT3G05620.1,AT5G53370.1,AT3G10710.1,AT1G11580.1,AT3G62170.1,AT2G26450.1,AT2G26440.1,A  
T5G51490.1,AT3G14310.1,AT3G05610.1,AT4G02300.1,AT3G43270.1,AT4G02320.1,AT4G33230.1,AT4G02330.1,AT  
4G33220.1,AT5G49180.1,AT2G47550.1,AT1G23200.1,AT1G53840.1,AT3G06830.1,AT1G53830.1,AT2G45220.1,AT3  
G47400.1,AT1G02810.1,AT5G27870.1  
Phypa1|28313,Phypa1|30349,Phypa1|27357,Phypa1|2749,Phypa1|1398  
AT5G64640.1,AT5G09760.1 Phypa1|30369,Phypa1|1396  
AT5G47500.1 Phypa1|30087,Phypa1|25774  
AT2G36700.1,AT1G05310.1,AT2G36710.1 Phypa1|35946,Phypa1|27707  
AT3G29090.1 Phypa1|37200  
AT2G21610.1  
AT5G07420.1,AT5G61680.1,AT1G69940.1,AT5G07410.1  
AT5G55590.1  
AT1G11370.1,AT3G49220.1,AT3G14300.1  
AT2G47030.1,AT2G47040.1  
AT5G20860.1  
AT1G44980.1  
AT2G47280.1,AT3G24130.1,AT2G19150.1,AT5G18990.1,AT3G17060.1  
Phypa1|606,Phypa1|562,Phypa1|39412,Phypa1|1443,Phypa1|30794,Phypa1|131,Phypa1|37084,Phypa1|  
1444,Phypa1|29300,Phypa1|38562,Phypa1|549,Phypa1|29294  
Phypa1|29214  
Phypa1|1892  
Phypa1|26697,Phypa1|36591,Phypa1|1056  
Phypa1|10672  
Phypa1|555,Phypa1|1920  
Phypa1|37351,Phypa1|10336  
Phypa1|25451  
Phypa1|1400  
Phypa1|6496  
Phypa1|19329  
Phypa1|24042,Phypa1|25796  
Phypa1|23087  
Phypa1|532,Phypa1|25799,Phypa1|27799  
Phypa1|18090  
Phypa1|1038  
AT2G28320.1,AT3G54800.1 Phypa1|26692,Phypa1|30200,Phypa1|27362,Phypa1|23782,Phypa1|25177  
AT5G25010.1,AT5G10750.1,AT5G24990.1 Phypa1|638,Phypa1|634  
AT5G35180.1 Phypa1|30341,Phypa1|28184,Phypa1|27308,Phypa1|37844  
AT5G45560.1,AT4G19040.1 Phypa1|17889,Phypa1|35724  
AT1G06050.1  
AT5G25020.1  
Phypa1|35742  
Phypa1|27152,Phypa1|33677  
AT5G12470.1 Phypa1|27834,Phypa1|38846  
AT3G56140.1,AT2G40400.1 Phypa1|420,Phypa1|912  
Phypa1|8516  
AT4G31180.1,AT4G26870.1 Phypa1|17380  
AT3G21060.1 Phypa1|2686  
AT5G50810.1 Phypa1|24461,Phypa1|23703  
AT5G15440.1,AT5G39360.1 Phypa1|29225  
AT3G63060.1  
AT1G67930.1 Phypa1|25850,Phypa1|28262  
AT1G69060.1 Phypa1|32092,Phypa1|35215  
AT3G07090.1 Phypa1|27008

Phypa1|25965  
AT5G63290.1 Phypa1|25890  
Phypa1|31178  
AT5G07720.1,AT1G74380.1 Phypa1|34706  
AT4G37690.1,AT1G18690.1,AT4G02500.1,AT3G62720.1  
AT4G38310.1  
Phypa1|25249,Phypa1|25260,Phypa1|15710,Phypa1|28547,Phypa1|26823,Phypa1|37010,Phypa1|38283  
Phypa1|38481,Phypa1|28220,Phypa1|36971,Phypa1|27815  
Phypa1|10878  
AT5G28750.1 Phypa1|39257,Phypa1|37007  
AT5G52440.1 Phypa1|24102,Phypa1|36952  
AT5G17570.1,AT3G03500.1 Phypa1|30408  
Phypa1|25813  
AT3G16220.1,AT3G16230.1 Phypa1|37056  
AT2G33255.1 Phypa1|35989,Phypa1|36225  
AT4G21710.1 Phypa1|33501  
AT1G29940.1 Phypa1|37441  
AT5G45140.1 Phypa1|36158  
Phypa1|25561,Phypa1|27371,Phypa1|24979,Phypa1|27989,Phypa1|1412,Phypa1|24868,Phypa1|4954,Phypa1|27850  
Phypa1|23709,Phypa1|29403  
Phypa1|2383,Phypa1|2381,Phypa1|2380  
Phypa1|15144  
Phypa1|27996  
AT2G38700.1,AT3G54250.1 Phypa1|23964,Phypa1|23972  
AT4G10920.1 Phypa1|29659  
AT4G00980.1  
AT1G25290.1 Phypa1|35272  
AT4G33670.1 Phypa1|37604,Phypa1|25893  
Phypa1|23615  
AT1G04690.1 Phypa1|36867,Phypa1|38360  
Phypa1|23237  
AT5G50430.1,AT1G17280.1 Phypa1|35571  
AT2G06925.1 Phypa1|19508,Phypa1|30193  
AT5G03450.1 Phypa1|18431  
AT5G03750.1  
AT1G80780.1,AT2G32070.1 Phypa1|36892,Phypa1|38286  
AT1G61470.1,AT1G06450.1,AT1G27890.1,AT1G15920.1,AT1G27820.1,AT3G44240.1  
AT5G22250.1,AT3G44260.1  
AT5G10960.1  
AT3G01780.1 Phypa1|33233,Phypa1|31621,Phypa1|38587  
AT1G08520.1 Phypa1|38703  
AT1G23280.1 Phypa1|2578,Phypa1|4125  
AT3G24506.1,AT2G17240.1 Phypa1|4107,Phypa1|2579  
AT5G62440.1 Phypa1|24816,Phypa1|1164  
Phypa1|864  
Phypa1|5117  
AT4G15030.1 Phypa1|36886  
AT3G26480.1,AT2G18900.1 Phypa1|34676  
AT3G55360.1 Phypa1|2651,Phypa1|38272,Phypa1|4975  
AT4G35630.1,AT2G17630.1 Phypa1|26980  
Phypa1|30013  
AT4G17830.1 Phypa1|36086  
Phypa1|30609  
AT2G03810.1,AT1G13650.2 Phypa1|32166  
AT1G21690.1 Phypa1|36975  
AT5G27740.1 Phypa1|36908  
AT1G60490.1 Phypa1|36621  
AT1G03600.1 Phypa1|774  
AT5G19855.1 Phypa1|2109,Phypa1|27965  
AT4G03415.1,AT1G03590.1 Phypa1|36745,Phypa1|35972,Phypa1|510  
AT5G01700.2  
AT3G05640.1,AT3G16800.1,AT5G27930.1  
AT4G32950.1,AT5G26010.1  
AT1G79630.1,AT1G16220.1  
AT5G36250.1,AT3G02750.3  
Phypa1|33186  
AT5G13700.1 Phypa1|5468  
Phypa1|33416  
AT3G53390.1,AT2G37160.1 Phypa1|39275  
AT4G15840.1 Phypa1|7883,Phypa1|27715,Phypa1|1355,Phypa1|39222  
AT3G04240.1 Phypa1|37790,Phypa1|37475  
AT3G07270.1 Phypa1|26060,Phypa1|28140  
AT3G10630.1 Phypa1|25031  
AT5G51840.1 Phypa1|37297  
AT4G02460.1 Phypa1|30830  
AT2G44920.2 Phypa1|26571  
Phypa1|2104  
AT2G27120.1,AT1G08260.1 Phypa1|28059  
AT1G16000.1,AT1G80890.1 Phypa1|33880  
AT2G35830.1,AT2G35820.1,AT2G35810.1 Phypa1|26361  
AT1G11780.1 Phypa1|34827

AT1G68720.1 Phypa1|6461  
 Phypa1|29858  
 AT3G10380.1 Phypa1|24577,Phypa1|26188,Phypa1|26772  
 AT3G16640.1 Phypa1|6843,Phypa1|38378  
 AT3G05540.1  
 AT4G24160.1 Phypa1|27273  
 Phypa1|21645  
 AT5G40950.1 Phypa1|36154,Phypa1|34300  
 AT5G57015.1,AT4G26100.1,AT1G72710.1 Phypa1|28728,Phypa1|30651,Phypa1|28732  
 AT4G28540.1,AT4G14340.1,AT3G23340.1,AT5G43320.1,AT5G44100.1,AT1G03930.1,AT1G04440.1  
 AT4G28880.1,AT4G28860.1  
 AT4G08800.1,AT2G19470.1  
 Phypa1|14328,Phypa1|2932  
 Phypa1|27745  
 AT3G13970.1,AT1G54210.1 Phypa1|37029  
 AT1G03190.1 Phypa1|39136  
 AT1G34000.1 Phypa1|5773  
 AT3G52220.1 Phypa1|26522  
 AT5G56660.1,AT1G51780.1,AT3G02875.1,AT5G54140.1,AT1G44350.1,AT1G51760.1,AT5G56650.1  
 Phypa1|21582,Phypa1|30041,Phypa1|31083,Phypa1|30883,Phypa1|30489  
 Phypa1|31305,Phypa1|30770  
 Phypa1|30021,Phypa1|30470,Phypa1|31477,Phypa1|31148,Phypa1|31060  
 Phypa1|21580  
 Phypa1|31466  
 Phypa1|30951  
 AT2G43650.1 Phypa1|32532  
 AT3G28230.1  
 AT5G54260.1 Phypa1|1361  
 AT3G17470.1 Phypa1|24739,Phypa1|28613  
 AT1G78620.2 Phypa1|28430,Phypa1|38950  
 AT4G19100.1 Phypa1|286  
 AT5G52780.1  
 AT5G45040.1 Phypa1|26325  
 AT2G44050.1 Phypa1|38270,Phypa1|38620  
 AT1G50000.1 Phypa1|38371  
 AT1G55900.1 Phypa1|28081,Phypa1|28825  
 AT5G25752.1 Phypa1|27903  
 AT5G25640.1  
 AT4G22830.1 Phypa1|33872  
 Phypa1|33582  
 AT3G13230.1 Phypa1|29193  
 AT2G27730.1 Phypa1|35474,Phypa1|33073  
 AT3G27220.1,AT1G51540.1 Phypa1|25839  
 AT3G14410.1 Phypa1|37321  
 AT5G25400.1,AT5G11230.1,AT2G25520.1,AT4G32390.1 Phypa1|37356,Phypa1|36518,Phypa1|37238  
 AT1G48230.1,AT3G17430.1  
 AT1G53660.1  
 AT5G26040.2 Phypa1|37187,Phypa1|26342  
 Phypa1|6996  
 AT2G04550.1 Phypa1|728,Phypa1|23843  
 AT2G43090.1,AT2G43100.1,AT3G58990.1 Phypa1|2030,Phypa1|2046  
 AT1G74910.1,AT2G04650.1 Phypa1|35993,Phypa1|25198,Phypa1|38554  
 AT4G14210.1 Phypa1|30298  
 AT1G50260.1,AT3G19830.1 Phypa1|1370  
 Phypa1|11072,Phypa1|34545  
 AT2G41660.1,AT5G23100.1,AT3G25640.1 Phypa1|2021,Phypa1|30079,Phypa1|24517  
 AT5G06990.1,AT2G21990.1,AT4G39610.1  
 AT1G21050.1,AT1G76610.1,AT2G37880.1,AT2G22460.1,AT5G65340.1  
 AT5G42680.1  
 AT1G67960.1 Phypa1|30221  
 AT2G41670.1 Phypa1|36731  
 AT4G10650.1  
 AT5G18230.1 Phypa1|39087,Phypa1|33701  
 Phypa1|23895  
 AT1G15660.1 Phypa1|19069  
 AT4G37460.1 Phypa1|26934  
 AT1G50500.1 Phypa1|29648,Phypa1|35997  
 AT1G50970.1  
 AT2G32970.1 Phypa1|27573  
 Phypa1|33570  
 AT5G16280.1 Phypa1|29600  
 AT3G47810.1 Phypa1|38218,Phypa1|38773  
 AT5G63010.1 Phypa1|26971  
 AT2G20920.1 Phypa1|36417,Phypa1|26711  
 AT4G09510.1,AT4G34860.1,AT1G22650.1,AT1G35580.1,AT1G72000.1  
 Phypa1|29222,Phypa1|30134,Phypa1|38438,Phypa1|39472  
 AT5G22510.1 Phypa1|949,Phypa1|38260,Phypa1|1801  
 AT1G56560.1,AT3G06500.1,AT3G05820.1  
 Phypa1|29383  
 AT5G62650.1 Phypa1|33265  
 AT3G46210.1 Phypa1|37532  
 AT2G07110.1

AT4G01220.1,AT4G01770.1,AT4G01750.1,AT1G56550.1 Phypa1|25229  
AT3G09690.1,AT5G02970.1 Phypa1|78,Phypa1|38447,Phypa1|28160  
AT1G27980.1 Phypa1|27219  
AT4G27340.1 Phypa1|1792  
AT5G20670.1,AT4G14819.1,AT1G54095.1,AT1G72510.1,AT2G09970.1,AT3G22540.1  
Phypa1|1282,Phypa1|289,Phypa1|1281  
AT5G25840.1,AT1G79770.1  
AT2G25780.1  
AT2G45980.1,AT4G00355.1 Phypa1|35558  
AT1G52930.1,AT3G15460.1 Phypa1|37055  
AT3G15520.1 Phypa1|28951,Phypa1|25855  
AT3G44620.1 Phypa1|25578  
Phypa1|32079  
Phypa1|30430  
AT2G20875.1 Phypa1|18509  
AT1G34245.1  
AT5G11560.1 Phypa1|36782  
AT4G22590.1,AT4G12430.1,AT5G51460.1  
Phypa1|29215,Phypa1|28189,Phypa1|38578,Phypa1|30139,Phypa1|36313,Phypa1|26151,Phypa1|28927  
AT2G22190.1,AT1G22210.1,AT5G10100.1,AT4G39770.1,AT1G78090.1,AT5G65140.1,AT1G35910.1  
AT2G16595.1,AT2G21160.1 Phypa1|18125,Phypa1|39278,Phypa1|34751  
AT5G08500.1,AT5G23575.1 Phypa1|36694  
AT4G13430.1 Phypa1|37694  
AT4G03280.1 Phypa1|27700,Phypa1|25766  
AT2G06210.1 Phypa1|36223  
AT5G11600.1 Phypa1|1115,Phypa1|12249  
AT1G19990.1  
AT3G05010.1,AT5G27210.1 Phypa1|31227,Phypa1|23805,Phypa1|26511  
AT5G56290.1 Phypa1|37347  
AT1G50900.1 Phypa1|764  
Phypa1|2236  
AT2G15240.1 Phypa1|39201,Phypa1|38054  
AT1G16720.1 Phypa1|30091,Phypa1|37054  
AT5G13760.1 Phypa1|39559,Phypa1|25705,Phypa1|28806  
AT3G15380.1 Phypa1|25552  
Phypa1|37299  
AT2G14680.1 Phypa1|3549  
AT1G01610.1,AT2G38110.1,AT4G00400.1 Phypa1|36438,Phypa1|12737  
Phypa1|2519,Phypa1|37232  
Phypa1|37123,Phypa1|18573,Phypa1|26832  
AT4G39450.1 Phypa1|38624,Phypa1|38122,Phypa1|29557  
AT1G48130.1 Phypa1|38225  
Phypa1|32403,Phypa1|38524  
AT4G14030.1,AT4G14040.1,AT3G23800.1 Phypa1|31779  
AT3G47490.1 Phypa1|223  
AT1G18680.1 Phypa1|38312  
AT4G33945.1 Phypa1|17993  
AT1G72175.1,AT1G22510.1 Phypa1|37105  
AT4G33940.1  
AT5G27400.1 Phypa1|36560,Phypa1|29660  
AT2G17980.1 Phypa1|20496,Phypa1|28775  
AT4G31740.1  
AT3G23325.1,AT4G14342.1 Phypa1|37649  
AT1G72420.1,AT1G17350.1 Phypa1|36495  
AT3G46560.1 Phypa1|24209,Phypa1|2518  
AT2G01080.1 Phypa1|33196  
Phypa1|16935  
AT1G71860.1 Phypa1|3247,Phypa1|28731  
AT1G08700.1 Phypa1|36588  
AT2G29900.1  
AT1G25682.1 Phypa1|38099  
AT1G25988.1  
AT3G63000.1,AT2G47970.1 Phypa1|33109  
AT1G32500.1 Phypa1|89  
Phypa1|15819  
AT5G38660.1 Phypa1|29637  
AT4G16170.1 Phypa1|39616,Phypa1|37442  
AT1G80680.1 Phypa1|29094  
AT3G19490.1 Phypa1|2987,Phypa1|34996  
AT1G49810.1  
AT3G59400.1 Phypa1|27723,Phypa1|30181  
AT4G15510.1 Phypa1|27224  
AT4G28706.2,AT5G43910.2 Phypa1|28873  
AT2G37360.1,AT3G53510.1,AT3G55110.1,AT5G13580.1,AT3G55130.1,AT3G55090.1,AT3G55100.1,AT2G39350.1  
Phypa1|24787,Phypa1|27747  
AT2G36380.1,AT1G66950.1 Phypa1|39658,Phypa1|36039  
AT2G13610.1 Phypa1|30410,Phypa1|37911,Phypa1|27771,Phypa1|38972  
AT4G27420.1 Phypa1|28567,Phypa1|37822  
AT2G01320.3 Phypa1|29464  
AT2G37010.1,AT1G53390.1,AT5G60740.1 Phypa1|26961,Phypa1|28557,Phypa1|24573  
AT3G16340.1,AT1G15210.1,AT1G59870.1 Phypa1|25364,Phypa1|26844,Phypa1|37481,Phypa1|28446  
AT3G52310.1,AT5G06530.1 Phypa1|26661

AT1G15520.1  
 AT3G30842.1  
 AT4G15230.1  
 AT2G29940.1  
 AT2G26910.1  
 AT1G53270.1  
 AT4G25750.1,AT5G52860.1  
 AT5G19410.1  
 AT1G71960.1,AT1G31770.1  
 AT3G25620.1  
 AT3G53480.1,AT2G37280.1,AT4G15215.1,AT4G15236.1  
 AT3G13220.1  
     Phypa1|1777,Phypa1|1779,Phypa1|428,Phypa1|34472,Phypa1|26825  
     Phypa1|27250  
     Phypa1|7012  
     Phypa1|25106,Phypa1|36093,Phypa1|28594,Phypa1|25834,Phypa1|26848,Phypa1|38650  
     Phypa1|8068,Phypa1|35189,Phypa1|920  
     Phypa1|28621  
     Phypa1|12031  
     Phypa1|1182  
     Phypa1|2628  
     Phypa1|14553  
     Phypa1|26681  
 AT1G67440.1,AT1G67460.1      Phypa1|36329  
     Phypa1|30754  
 AT3G19280.1,AT1G49710.1      Phypa1|38433  
 AT3G52155.1      Phypa1|684  
 AT4G14965.1      Phypa1|32209  
 AT5G11270.1      Phypa1|32031  
 AT1G03140.1      Phypa1|37990  
 AT1G54590.1  
 AT2G42210.2      Phypa1|29978,Phypa1|25346  
 AT2G24240.1,AT4G30940.1      Phypa1|39111,Phypa1|24350  
 AT1G71080.1,AT5G38050.1      Phypa1|31976,Phypa1|17151  
 AT5G23450.1      Phypa1|39399,Phypa1|13115  
 AT3G09880.1,AT5G03470.1  
     Phypa1|28604,Phypa1|38839,Phypa1|27435,Phypa1|36338,Phypa1|30182,Phypa1|33669,Phypa1|36849  
 AT3G21650.1,AT1G13460.1,AT3G26020.1,AT4G15415.1  
 AT3G54930.1  
 AT3G26030.1  
 AT5G25510.1  
 AT5G44720.1,AT1G30910.1      Phypa1|24785  
     Phypa1|33854  
 AT2G39990.1      Phypa1|29916,Phypa1|25639  
 AT5G55130.1      Phypa1|29782  
     Phypa1|30743  
 AT4G24940.1,AT5G50580.2,AT5G50680.1      Phypa1|32232  
 AT4G32260.1      Phypa1|25051,Phypa1|28762  
 AT5G57300.1      Phypa1|36497  
     Phypa1|31318  
 AT1G59940.1,AT5G62920.1,AT3G48100.1,AT1G10470.1,AT2G41310.1,AT3G57040.1,AT1G74890.1,AT1G19050.1,AT2G40670.1  
     Phypa1|1533,Phypa1|2064,Phypa1|1180,Phypa1|692,Phypa1|748,Phypa1|2067,Phypa1|1538  
 AT2G07440.1  
 AT3G56380.1  
     Phypa1|1726  
 AT4G09520.1,AT3G30841.1      Phypa1|32762  
 AT2G01110.1      Phypa1|25773,Phypa1|27383  
     Phypa1|22435  
 AT5G16790.1,AT3G02950.1      Phypa1|37825  
 AT3G03380.1      Phypa1|5651,Phypa1|17422  
 AT5G50320.1      Phypa1|28755  
     Phypa1|15014  
 AT4G39920.1      Phypa1|27614  
 AT2G44060.1      Phypa1|23802,Phypa1|37476  
     Phypa1|35831  
 AT1G01470.1,AT2G46140.1      Phypa1|24080  
 AT1G54770.1,AT5G30495.1      Phypa1|725  
 AT1G05055.1      Phypa1|36779  
 AT2G03390.1      Phypa1|39092  
 AT1G51740.1      Phypa1|36557  
 AT1G75020.1,AT3G18850.1      Phypa1|36846  
 AT2G46100.1      Phypa1|1126  
 AT3G04890.1      Phypa1|25143  
 AT5G20140.1      Phypa1|28447  
 AT1G10970.1,AT1G60960.1,AT4G33020.1      Phypa1|28403  
 AT3G12750.1  
 AT4G19680.2  
     Phypa1|4852,Phypa1|24197  
 AT2G39260.1      Phypa1|27885  
     Phypa1|16480  
 AT1G54500.1      Phypa1|32302,Phypa1|33074  
 AT3G57610.1      Phypa1|39417,Phypa1|38701

AT2G37975.1 Phypa1|38076  
AT5G45010.1,AT1G64750.1 Phypa1|4468,Phypa1|15460  
AT1G71720.1 Phypa1|17905,Phypa1|32440  
Phypa1|3766  
AT3G05480.1 Phypa1|28015,Phypa1|27910  
AT4G33110.1,AT4G33120.1 Phypa1|36733  
AT5G62810.1 Phypa1|35372,Phypa1|35133  
AT4G20960.1 Phypa1|26912  
AT3G02420.1 Phypa1|32665  
AT3G56840.1 Phypa1|29393  
Phypa1|26257  
AT3G10370.1 Phypa1|24955  
Phypa1|30045  
AT4G33090.1 Phypa1|39543  
AT1G63970.1 Phypa1|29928  
AT3G06820.1,AT1G80210.1 Phypa1|36565  
Phypa1|19545,Phypa1|32938  
AT3G23620.1 Phypa1|17951,Phypa1|23708  
AT1G28120.1 Phypa1|36561,Phypa1|38744  
AT4G37560.1,AT4G37550.1 Phypa1|39300  
AT1G05150.1,AT2G32450.1 Phypa1|25940,Phypa1|25327  
Phypa1|32571  
AT1G66520.1 Phypa1|28233  
Phypa1|30751  
AT5G20180.1 Phypa1|27085  
ATCG00760.1  
AT2G45790.1 Phypa1|37260  
AT1G63660.1 Phypa1|23684  
Phypa1|8806  
AT4G33150.1 Phypa1|24001  
AT1G34150.1 Phypa1|16735  
AT5G11980.1 Phypa1|32306,Phypa1|442  
AT1G07320.1 Phypa1|25122,Phypa1|658,Phypa1|660  
AT4G15790.1 Phypa1|5141,Phypa1|11762,Phypa1|33016  
Phypa1|17147  
AT3G02780.1,AT5G16440.1 Phypa1|2586  
AT1G12840.1 Phypa1|28425  
Phypa1|5954  
AT3G49880.1,AT5G67540.2 Phypa1|30569,Phypa1|25153  
AT2G25355.1,AT4G32175.1 Phypa1|37574  
AT3G62010.1 Phypa1|23962,Phypa1|38857  
AT5G58240.1 Phypa1|29756  
AT1G69040.2,AT1G76990.1 Phypa1|27821  
AT5G65890.1  
Phypa1|28776,Phypa1|25808,Phypa1|37088,Phypa1|38737  
AT1G06110.1 Phypa1|39549  
AT2G40980.1 Phypa1|2860,Phypa1|1774  
AT1G37150.2,AT2G25710.1 Phypa1|28902  
AT2G46230.1 Phypa1|23700,Phypa1|37359  
AT1G26530.1  
AT3G60360.1 Phypa1|710  
AT3G06150.1,AT5G19060.1 Phypa1|20686  
Phypa1|25065  
AT1G01220.1 Phypa1|35167  
AT4G31120.1 Phypa1|37931,Phypa1|39205  
AT1G01710.1 Phypa1|33412  
AT4G00510.1  
AT4G00520.1  
Phypa1|33234  
Phypa1|28376  
AT1G61290.1,AT3G11820.1,AT4G03330.1,AT1G11250.1  
Phypa1|38278,Phypa1|38655,Phypa1|26871,Phypa1|33064,Phypa1|30971,Phypa1|36991  
AT3G03800.1,AT5G08080.1 Phypa1|28474,Phypa1|21708  
AT3G52400.1  
AT1G08560.1  
AT2G18260.1  
Phypa1|35939,Phypa1|29829  
AT2G26930.1 Phypa1|39154  
AT5G11900.1 Phypa1|34042,Phypa1|38736  
AT5G62270.1 Phypa1|5263,Phypa1|31736  
AT1G51720.1 Phypa1|6322,Phypa1|24731,Phypa1|36342  
Phypa1|31317  
AT4G12240.1 Phypa1|165,Phypa1|579,Phypa1|1045  
AT5G52010.1  
AT2G41020.1 Phypa1|29386  
AT5G66120.2 Phypa1|25857  
Phypa1|31238  
AT2G03200.1 Phypa1|25157,Phypa1|28650,Phypa1|26909,Phypa1|24635,Phypa1|499,Phypa1|11803  
AT3G61820.1,AT1G01300.1 Phypa1|25454,Phypa1|25821,Phypa1|99  
AT3G25700.1 Phypa1|37789,Phypa1|38166,Phypa1|25897  
AT3G50050.1,AT5G43100.1 Phypa1|36397,Phypa1|429  
AT1G08210.1,AT5G22850.1,AT2G36670.1 Phypa1|28525,Phypa1|26594,Phypa1|39673

AT4G12920.1  
 AT1G31450.1,AT5G33340.1,AT2G35615.1,AT1G64830.1  
 AT4G16563.1,AT3G52500.1  
 AT2G28040.1  
 AT3G54400.1,AT1G09750.1  
 AT5G02190.1,AT1G66180.1,AT2G39710.1,AT5G37540.1  
 AT1G25510.1,AT3G18490.1  
 AT4G30040.1,AT2G23945.1,AT2G28010.1  
 AT5G10760.1,AT1G79720.1,AT5G10770.1  
 AT3G20015.1  
 AT2G28030.1,AT2G28220.1  
 AT2G42980.1,AT3G59080.1  
 AT5G36260.1,AT3G02740.1,AT1G65240.1,AT1G05840.1  
 AT3G42550.1  
     Phypa1|8492  
     Phypa1|28420,Phypa1|29952  
     Phypa1|1579  
     Phypa1|11184  
 AT5G48300.1           Phypa1|2497,Phypa1|36810,Phypa1|24025  
 AT1G27680.1           Phypa1|15276,Phypa1|24245,Phypa1|30515,Phypa1|3448,Phypa1|30403  
 AT1G05610.1  
 AT2G21590.1,AT4G39210.1  
 AT5G19220.1  
     Phypa1|24405  
     Phypa1|8501  
     Phypa1|36368  
 AT1G50670.1           Phypa1|24642  
 AT3G61420.1,AT1G55750.1           Phypa1|30255  
 AT1G80950.1           Phypa1|1877  
 AT4G28020.1           Phypa1|37937  
 AT1G12400.1           Phypa1|25510,Phypa1|36261  
 AT4G19180.1           Phypa1|30531,Phypa1|1785,Phypa1|2248,Phypa1|1383  
 AT1G22940.1           Phypa1|28497  
     Phypa1|22669  
 AT5G23880.1           Phypa1|38411  
 AT1G67320.1           Phypa1|39723  
 AT5G60760.1,AT3G45090.1           Phypa1|24703,Phypa1|424,Phypa1|25108  
 AT5G50340.1           Phypa1|25534  
 AT1G24320.1,AT1G67490.1           Phypa1|31763  
 AT1G65230.1           Phypa1|27457,Phypa1|29051  
 AT1G76860.1,AT1G21190.1           Phypa1|36117  
 AT3G07050.1           Phypa1|28226  
     Phypa1|477  
 AT4G01690.1           Phypa1|36260  
     Phypa1|21648  
 AT2G22780.1,AT5G09660.1           Phypa1|38510,Phypa1|32608  
 AT3G47520.1           Phypa1|25469,Phypa1|27006  
 AT1G53240.1,AT3G15020.1           Phypa1|28928,Phypa1|27287  
 AT3G53910.1  
     Phypa1|15771  
     Phypa1|27875  
 AT2G19870.1           Phypa1|37460  
     Phypa1|22793  
 AT1G04900.1           Phypa1|28909  
 AT1G64355.1           Phypa1|2149  
 AT5G19150.1           Phypa1|25778  
 AT1G16970.1           Phypa1|2989  
 AT5G12370.1           Phypa1|37925  
     Phypa1|25666  
 AT1G32260.1,AT2G35480.1           Phypa1|38455,Phypa1|252  
 AT4G37000.1           Phypa1|27079  
 AT3G26410.1           Phypa1|23939  
 AT3G51050.1           Phypa1|24302,Phypa1|24279,Phypa1|31762  
 AT5G06140.1           Phypa1|39002  
 AT3G54440.2           Phypa1|28008  
     Phypa1|23437  
 AT3G21480.1,AT4G03130.1           Phypa1|33640,Phypa1|34891  
 AT5G61310.1,AT2G47380.1           Phypa1|39415,Phypa1|38697  
 AT4G01210.1           Phypa1|36239,Phypa1|10  
 AT5G04480.1  
 AT2G04900.1           Phypa1|31854,Phypa1|25069,Phypa1|25077  
     Phypa1|31853  
 AT5G13840.1           Phypa1|28453,Phypa1|2814,Phypa1|39248,Phypa1|27703  
 AT5G27080.1,AT5G26900.1,AT4G33260.1,AT4G33270.1,AT5G27570.1  
     Phypa1|2912,Phypa1|2562,Phypa1|24759,Phypa1|26874,Phypa1|25495,Phypa1|27137  
 AT4G11920.1,AT4G22910.1  
 AT5G27945.1  
     Phypa1|32421  
 AT1G71300.1,AT1G71270.1           Phypa1|39001  
 AT1G21370.1           Phypa1|29903,Phypa1|26458  
     Phypa1|5875  
 AT2G25310.1,AT4G32130.1           Phypa1|37432



AT5G38650.1,AT1G67250.1 Phypa1|24790,Phypa1|39184  
AT1G62920.1  
AT2G03690.1 Phypa1|29194  
AT5G15260.1,AT3G01170.1 Phypa1|26121  
AT3G24030.1 Phypa1|32293  
Phypa1|31436,Phypa1|30943  
AT5G64670.1 Phypa1|641  
AT1G77090.1 Phypa1|36626  
Phypa1|6578  
AT1G55000.1 Phypa1|25071  
AT4G24840.1 Phypa1|23836  
Phypa1|32822  
AT4G30500.1,AT2G23940.1 Phypa1|38813  
AT3G05000.1 Phypa1|28799  
Phypa1|24587  
AT4G24440.1 Phypa1|36276,Phypa1|27552  
AT5G03900.2 Phypa1|48  
Phypa1|20351  
AT5G59560.1 Phypa1|35823,Phypa1|27984  
AT1G26740.1,AT1G69485.1 Phypa1|29421  
AT3G03110.1,AT5G17020.1 Phypa1|29484,Phypa1|32877  
Phypa1|6596  
Phypa1|14289  
AT2G01690.2 Phypa1|37207,Phypa1|27869,Phypa1|25609  
Phypa1|19311  
AT3G52050.1 Phypa1|1888  
Phypa1|19432  
AT1G72270.1,AT4G27010.1 Phypa1|5694  
AT3G58800.1 Phypa1|28959  
Phypa1|7351  
AT1G15780.1 Phypa1|35539  
AT2G10440.1,AT1G15770.1  
AT1G15790.1  
Phypa1|7689  
Phypa1|10532,Phypa1|33641  
AT5G23060.1 Phypa1|29463,Phypa1|37287,Phypa1|30203  
AT1G07040.1 Phypa1|10500  
AT1G27030.1,AT1G27020.1  
AT2G43030.1 Phypa1|2812,Phypa1|14020  
Phypa1|31410  
AT1G50510.1 Phypa1|24088  
AT2G24020.1,AT4G30620.1 Phypa1|32595,Phypa1|34622,Phypa1|33369  
AT1G43580.1 Phypa1|26462,Phypa1|1004  
AT2G23090.1 Phypa1|36539  
AT2G27340.3,AT3G58130.1 Phypa1|29166  
AT2G28605.1 Phypa1|39356  
AT5G39990.1,AT5G15050.1  
Phypa1|34980,Phypa1|28309,Phypa1|24084,Phypa1|19599,Phypa1|36928,Phypa1|28590  
AT1G53100.1,AT3G15350.1,AT4G27480.1  
AT1G71070.1  
AT4G03340.1,AT1G03520.1  
AT2G37585.1  
AT3G03690.1  
AT3G24040.1  
AT1G51730.1 Phypa1|35158,Phypa1|29815  
Phypa1|15392  
AT5G54240.1,AT4G27350.1 Phypa1|645  
AT2G45150.1,AT3G60620.1 Phypa1|27340,Phypa1|27713  
AT1G32080.1 Phypa1|26610  
Phypa1|37305  
AT2G07687.1,ATMG00730.1 Phypa1|30505,Phypa1|1348,Phypa1|23627  
AT3G22480.1 Phypa1|2520  
Phypa1|5299  
AT5G13780.1 Phypa1|37924  
Phypa1|25156  
AT5G14850.1 Phypa1|932  
AT5G58030.1 Phypa1|39560  
Phypa1|35096  
AT5G14110.1,AT5G40980.1,AT3G01940.1,AT3G48660.1,AT3G01950.1,AT5G50660.1,AT5G40970.1,AT3G27030.1,AT5G50560.1,AT5G63500.1 Phypa1|3569,Phypa1|2239,Phypa1|36462  
AT5G40960.1  
AT3G52570.1 Phypa1|29210  
AT4G10030.1 Phypa1|27280  
AT2G37500.1 Phypa1|38871  
Phypa1|23598  
AT1G79975.1 Phypa1|38724,Phypa1|37815  
AT5G12410.1 Phypa1|3246  
AT3G06580.1 Phypa1|32041,Phypa1|36917  
AT2G11000.1 Phypa1|2933  
AT3G56800.1,AT3G43810.1,AT1G66410.1,AT5G21274.1,AT2G41110.1,AT5G37780.1  
Phypa1|36838,Phypa1|25190,Phypa1|32401,Phypa1|36414  
AT1G32250.1,AT3G03000.1 Phypa1|33116,Phypa1|24449

AT3G50360.1,AT4G37010.2 Phypa1|26779,Phypa1|14744,Phypa1|38970  
AT1G76650.1,AT5G42380.1,AT5G49480.1,AT2G36180.1,AT2G27030.3,AT3G22930.1,AT3G10190.1,AT2G41410.1,A  
T3G29000.1,AT1G12310.1,AT1G62820.1,AT5G37770.1,AT2G15680.1,AT1G76640.1,AT5G17470.1,AT3G47480.1,AT  
3G01830.1,AT1G73630.1,AT2G41090.1,AT4G14640.1,AT4G20780.1,AT1G21550.1,AT1G66400.1,AT5G44460.1,AT1  
G18530.1,AT1G05990.1,AT3G03400.1,AT3G03410.1,AT3G25600.1,AT3G50770.1,AT2G41100.1,AT3G51920.1,AT3G  
59440.1 Phypa1|37435,Phypa1|2136,Phypa1|21236,Phypa1|26948,Phypa1|27541,Phypa1|39426,Phypa1|29536,P  
hypa1|798,Phypa1|30701,Phypa1|24571,Phypa1|291,Phypa1|755,Phypa1|8857,Phypa1|28038,Phypa1|3378,Phypa1|  
1630,Phypa1|20244,Phypa1|37032  
AT4G03290.1  
AT2G43290.1,AT1G18210.1,AT4G12860.1,AT5G17480.1,AT1G24620.1  
AT3G07490.1,AT3G03430.1  
Phypa1|38646  
Phypa1|34449  
AT2G38290.1  
Phypa1|29808,Phypa1|2953,Phypa1|24557,Phypa1|36054,Phypa1|2659,Phypa1|37150,Phypa1|36099  
Phypa1|35520  
Phypa1|32321  
Phypa1|7095  
AT1G76400.1 Phypa1|26118  
AT2G01720.1  
AT5G13310.1,AT5G13970.1 Phypa1|15500,Phypa1|32120  
AT5G51880.1 Phypa1|29658  
AT4G07390.1,AT5G59470.1 Phypa1|36647,Phypa1|39116  
AT5G47890.1 Phypa1|28387,Phypa1|31715  
AT3G54130.1 Phypa1|26065  
AT4G24930.1 Phypa1|11964  
AT5G51150.1 Phypa1|28161,Phypa1|957  
AT3G63420.1,AT3G22942.1 Phypa1|32094  
AT2G31890.1 Phypa1|28401  
AT1G63680.1 Phypa1|23898,Phypa1|2473  
Phypa1|30941  
Phypa1|11856  
AT2G21970.1 Phypa1|32975,Phypa1|25063  
AT5G60600.1 Phypa1|27150,Phypa1|38740,Phypa1|2556  
AT5G52840.1 Phypa1|29301  
AT4G28005.1  
AT3G52300.1 Phypa1|30538,Phypa1|28332,Phypa1|37357  
AT5G23535.1 Phypa1|37502  
AT5G55570.1 Phypa1|28754  
AT5G53000.1 Phypa1|32954,Phypa1|8716  
AT3G47630.2 Phypa1|37598  
AT2G13560.1 Phypa1|37966  
AT5G11670.1,AT5G25880.1,AT1G79750.1,AT2G19900.1 Phypa1|36386,Phypa1|38168,Phypa1|24365  
AT4G00570.1  
Phypa1|16490  
Phypa1|31485  
AT3G61710.1 Phypa1|26303,Phypa1|39463  
AT5G04830.1 Phypa1|36337,Phypa1|25255  
Phypa1|32074  
Phypa1|35589  
AT1G54140.1 Phypa1|2367  
AT5G53050.3 Phypa1|29396  
AT1G10490.1,AT3G57940.1 Phypa1|27333  
AT3G07910.1 Phypa1|39536,Phypa1|38410  
AT1G55670.1 Phypa1|27080,Phypa1|38798  
AT3G09085.1 Phypa1|6412,Phypa1|33735  
AT1G24570.1,AT3G26440.1,AT3G27470.1,AT1G08040.1,AT2G28310.1,AT1G67850.1,AT1G13000.1  
Phypa1|30712,Phypa1|39060  
AT1G61240.1,AT1G11170.1 Phypa1|26925,Phypa1|25165,Phypa1|26605,Phypa1|11297  
AT4G18530.1  
AT4G12840.1  
Phypa1|25132,Phypa1|26600,Phypa1|32260  
Phypa1|36749  
AT5G09920.1 Phypa1|24177  
Phypa1|27554  
AT4G36400.1 Phypa1|24661  
Phypa1|3282  
AT1G14850.1 Phypa1|27374  
AT5G17670.1 Phypa1|34523  
AT3G15351.1 Phypa1|25662  
AT3G15352.1,AT1G53030.1 Phypa1|36875,Phypa1|380  
AT2G39630.1 Phypa1|25050,Phypa1|27380  
AT5G67290.1 Phypa1|25814  
AT5G16530.1,AT5G15100.1 Phypa1|27015  
AT1G23080.1,AT5G57090.1,AT2G01420.2,AT1G73590.1,AT1G70940.1  
Phypa1|38213,Phypa1|25197,Phypa1|6695  
AT1G77110.1  
AT4G00231.1 Phypa1|1869  
AT3G48200.1 Phypa1|27260,Phypa1|25557  
Phypa1|33075  
AT2G38020.1 Phypa1|37678

AT4G28740.1 Phypa1|26436  
 AT5G10710.1 Phypa1|27768,Phypa1|29605  
 AT5G14600.1 Phypa1|23719  
 AT5G63220.1 Phypa1|32371,Phypa1|24149  
 Phypa1|22238  
 AT5G50440.1,AT2G36900.1 Phypa1|36803,Phypa1|31753  
 AT2G45990.1 Phypa1|2441,Phypa1|32593,Phypa1|28129  
 AT5G61830.1,AT5G51030.1 Phypa1|26724,Phypa1|27204  
 AT1G01800.1,AT3G61220.1,AT2G24190.1  
 AT3G59710.1  
 Phypa1|9297  
 Phypa1|7286,Phypa1|11093  
 AT5G65490.1 Phypa1|25899  
 AT2G30410.1 Phypa1|29779  
 Phypa1|9463,Phypa1|27733  
 Phypa1|27803  
 AT5G62140.1 Phypa1|28289,Phypa1|32918,Phypa1|35613  
 AT5G60540.1 Phypa1|6844,Phypa1|2994  
 Phypa1|31481  
 AT3G28710.1,AT3G28715.1 Phypa1|24254  
 Phypa1|4195  
 AT5G39410.1 Phypa1|36813,Phypa1|3048  
 AT3G01920.1 Phypa1|39048  
 AT5G06430.1 Phypa1|38092  
 AT1G61280.1 Phypa1|2140  
 AT3G03330.1 Phypa1|37292,Phypa1|37707  
 AT5G50600.1,AT5G50700.1,AT5G50770.1 Phypa1|36962  
 AT3G03350.1  
 AT5G50590.1,AT5G50690.1,AT3G47350.1,AT3G47360.1  
 AT4G10020.1  
 Phypa1|1062  
 AT1G18340.1 Phypa1|38184  
 AT2G05620.1 Phypa1|12601,Phypa1|25129  
 AT5G53850.2 Phypa1|24362  
 Phypa1|29399  
 AT2G29540.1 Phypa1|26910  
 AT1G34350.1 Phypa1|26434  
 AT1G54780.1 Phypa1|27890,Phypa1|1101  
 AT5G38880.1 Phypa1|36620,Phypa1|25398,Phypa1|25378,Phypa1|28788  
 AT1G59840.1 Phypa1|32798  
 AT5G42480.1 Phypa1|28813,Phypa1|37750  
 AT5G54440.1 Phypa1|24686  
 AT4G29260.1,AT5G51260.1,AT4G25150.1,AT4G29270.1 Phypa1|27764,Phypa1|30260,Phypa1|27598  
 AT1G04040.1,AT5G44020.1,AT5G24770.1,AT2G38600.1  
 AT2G39920.1  
 AT5G24780.1  
 Phypa1|30223,Phypa1|28223  
 AT2G02050.1 Phypa1|37145,Phypa1|38729  
 AT5G59980.1 Phypa1|32857  
 AT1G12370.2 Phypa1|36778  
 AT1G24040.1 Phypa1|31654  
 AT1G55090.1 Phypa1|26742  
 AT2G23840.1 Phypa1|635,Phypa1|636  
 AT1G65020.1 Phypa1|23759,Phypa1|30406  
 AT1G07830.1 Phypa1|36705  
 Phypa1|8217  
 AT1G08380.1 Phypa1|24031  
 AT1G01290.1 Phypa1|37426  
 Phypa1|31166  
 AT3G27100.1 Phypa1|36350,Phypa1|36756  
 Phypa1|28450  
 AT4G25720.1 Phypa1|36527  
 AT5G64160.1 Phypa1|32414  
 AT3G54690.1 Phypa1|28578,Phypa1|29799  
 Phypa1|5064  
 AT5G24680.1 Phypa1|28821,Phypa1|37711,Phypa1|535,Phypa1|1889  
 Phypa1|34710  
 AT5G13030.1 Phypa1|39324  
 AT3G07930.3 Phypa1|33463  
 AT1G63780.1 Phypa1|39612  
 Phypa1|19781  
 AT4G34200.1,AT1G17745.1,AT3G19480.1 Phypa1|4573,Phypa1|25916,Phypa1|27189,Phypa1|35930  
 AT1G72190.1 Phypa1|27325,Phypa1|27041  
 Phypa1|31489  
 Phypa1|3534  
 Phypa1|31202  
 AT3G28430.1 Phypa1|37116  
 AT2G20890.1 Phypa1|28048,Phypa1|28624  
 AT5G27990.1 Phypa1|753  
 AT3G22510.1  
 AT2G18250.1 Phypa1|31553,Phypa1|6894  
 AT4G33625.1 Phypa1|716,Phypa1|726,Phypa1|2087

AT1G80380.2 Phypa1|24463  
Phypa1|6270  
AT4G26710.1,AT5G55290.1 Phypa1|1321,Phypa1|877  
AT1G80190.1 Phypa1|32730,Phypa1|7890  
AT5G06360.1 Phypa1|37258  
AT5G15090.1,AT3G01280.1 Phypa1|37942,Phypa1|37766  
AT1G74710.2,AT1G18870.1 Phypa1|25404  
AT3G49920.1,AT5G67500.1  
AT5G37610.1  
AT5G57490.1  
Phypa1|24168,Phypa1|17638  
AT1G10960.1,AT1G60950.1 Phypa1|39669,Phypa1|39146,Phypa1|37309,Phypa1|37308  
AT4G14890.1 Phypa1|30191  
AT2G27510.1 Phypa1|26177,Phypa1|26206  
AT5G10000.1  
Phypa1|37319  
Phypa1|26649  
AT1G64440.1,AT4G23920.1,AT4G10960.1  
Phypa1|33995,Phypa1|37014,Phypa1|34476,Phypa1|29139,Phypa1|24319  
AT5G44480.1,AT4G20460.1,AT1G30620.1 Phypa1|39509,Phypa1|2605  
AT1G63180.1,AT1G12780.1  
AT2G34850.1  
Phypa1|26512,Phypa1|28531  
AT2G44670.1,AT4G17670.1,AT5G47060.1 Phypa1|35657,Phypa1|356  
AT1G78020.1,AT4G39795.1,AT1G22160.1  
AT5G49120.1  
AT5G65040.1,AT1G53885.1  
AT2G31510.1,AT1G65430.1,AT1G05890.1 Phypa1|36006,Phypa1|28687,Phypa1|28397,Phypa1|37093  
AT4G34370.1,AT2G16090.1,AT3G27710.1 Phypa1|24670,Phypa1|27533  
AT5G63760.1,AT2G31780.1,AT5G63730.1,AT2G31760.1,AT2G31770.1,AT5G08730.1,AT5G63750.1  
AT1G05880.1  
AT3G27720.1  
AT2G38770.1 Phypa1|38135  
AT1G13690.1 Phypa1|2522,Phypa1|5269  
AT1G09340.1 Phypa1|38741  
Phypa1|5544  
AT1G62660.1,AT1G12240.1 Phypa1|23839,Phypa1|24104  
Phypa1|2950,Phypa1|28675,Phypa1|25199,Phypa1|38047  
Phypa1|17459  
Phypa1|17458  
AT4G19900.1 Phypa1|1804,Phypa1|38055,Phypa1|1800  
Phypa1|5262  
AT5G39790.1 Phypa1|32522,Phypa1|1967  
AT1G19710.1,AT1G75420.1 Phypa1|25393  
AT1G78800.1 Phypa1|39440  
AT5G59880.1,AT3G46000.1,AT3G46010.1,AT1G01750.1,AT5G59890.1,AT5G52360.1,AT4G25590.1,AT4G00680.1  
Phypa1|39366  
AT2G31200.1  
AT4G34970.1,AT2G16700.1  
AT3G45990.1  
AT5G11340.1 Phypa1|36544  
AT2G40840.1 Phypa1|29445  
AT5G64860.1 Phypa1|37120,Phypa1|32739,Phypa1|24756  
AT1G78630.1 Phypa1|1529,Phypa1|2072,Phypa1|2051  
AT3G48425.1 Phypa1|37020  
Phypa1|12584  
AT1G63810.1 Phypa1|32927  
AT2G31970.1 Phypa1|26282  
AT5G04600.1 Phypa1|25802,Phypa1|2081  
AT4G35000.1 Phypa1|36174  
AT1G07890.1,AT3G09640.1 Phypa1|28337,Phypa1|2471  
AT1G77490.1 Phypa1|39710  
AT4G32320.1 Phypa1|29676  
AT4G35970.1  
AT1G33660.1  
AT4G08390.1  
AT3G18480.1 Phypa1|15068,Phypa1|24344  
AT5G15920.1 Phypa1|39498  
AT3G60500.1,AT3G12990.1 Phypa1|27446  
AT1G15370.1 Phypa1|35948  
AT5G26110.1 Phypa1|37683  
AT1G08120.1  
AT1G09190.1 Phypa1|35166,Phypa1|8673,Phypa1|32645  
AT4G28130.1,AT2G20900.1 Phypa1|23858  
AT4G34150.1 Phypa1|33386  
Phypa1|32277  
AT1G30970.1 Phypa1|3076,Phypa1|14832  
AT3G29390.1 Phypa1|983  
AT5G24710.1 Phypa1|38394  
AT1G67300.2,AT1G79820.1 Phypa1|37001,Phypa1|29235  
AT5G16150.1 Phypa1|37199  
AT5G59250.1 Phypa1|26058,Phypa1|1924

AT2G20780.1 Phypa1|978  
AT1G05030.1 Phypa1|16171  
AT2G35740.1,AT4G16480.1,AT1G30220.1 Phypa1|22579  
AT1G75220.1,AT1G19450.1 Phypa1|30150,Phypa1|30695,Phypa1|37013  
AT4G02050.1 Phypa1|38195,Phypa1|4211  
AT3G03090.1,AT5G17010.1  
AT4G36670.1,AT2G16130.1,AT2G16120.1,AT2G18480.1,AT3G18830.1  
AT1G08920.2,AT1G08890.1,AT3G05165.1,AT2G48020.1,AT1G54730.2,AT3G20460.1,AT3G05150.1,AT3G05400.1,A  
T5G27350.1,AT4G04750.1,AT3G05160.1,AT1G08930.1,AT5G18840.1,AT3G05155.1,AT5G27360.1  
AT1G08900.1  
AT4G04760.1  
AT1G11260.1,AT3G19930.1,AT4G21480.1,AT5G23270.1,AT3G19940.1,AT1G50310.1  
AT1G77210.1  
AT3G05960.1,AT5G26340.1,AT5G26250.1  
AT1G34580.1  
AT1G07340.1  
AT5G61520.1  
Phypa1|35936  
Phypa1|24549  
Phypa1|26982  
Phypa1|2619  
AT1G71730.1 Phypa1|2193  
AT2G22250.3 Phypa1|26613  
AT3G21540.1 Phypa1|37546,Phypa1|37548  
AT1G22040.1 Phypa1|33948,Phypa1|36529  
AT5G37370.1 Phypa1|37614,Phypa1|36229  
AT1G24706.1 Phypa1|27018  
AT4G19190.1 Phypa1|2654  
AT1G56290.1 Phypa1|27790  
AT1G50300.1 Phypa1|34120  
AT5G54750.1 Phypa1|2462  
Phypa1|21055  
AT1G68010.1 Phypa1|3777,Phypa1|35720  
AT4G03120.1 Phypa1|18260,Phypa1|34182  
AT1G52230.1,AT3G16140.1 Phypa1|27249,Phypa1|28971  
AT4G04350.1 Phypa1|26922  
Phypa1|22465  
AT3G55400.1 Phypa1|36712  
AT2G30320.1 Phypa1|28521  
AT5G08160.1 Phypa1|39465  
AT3G42660.1 Phypa1|35542  
AT3G05670.1 Phypa1|32562  
AT1G27960.1,AT3G03950.3,AT1G55500.1,AT3G17330.1,AT3G13060.2,AT1G48110.1,AT3G13460.1,AT5G58190.2,A  
T5G61020.1,AT1G79270.1,AT1G09810.1 Phypa1|1175,Phypa1|1176  
AT5G58130.1 Phypa1|32559  
AT1G72440.1 Phypa1|4216  
AT3G15970.1,AT1G52380.1 Phypa1|24334  
AT3G01160.1 Phypa1|35173  
AT2G21280.1 Phypa1|27187  
AT2G21960.1 Phypa1|33740  
AT3G10320.1,AT3G57380.1,AT2G41640.1 Phypa1|30116,Phypa1|38529  
AT2G03360.1,AT2G03370.1  
AT3G18170.1,AT3G18180.1  
AT4G17050.1 Phypa1|36272  
AT4G20130.1 Phypa1|28077  
AT1G50450.1 Phypa1|2990  
AT4G10130.1 Phypa1|35937  
AT5G23200.1,AT5G08270.1 Phypa1|26301  
AT2G30890.1 Phypa1|10832,Phypa1|2156  
AT2G31030.1,AT4G12460.1,AT2G31020.1,AT4G08180.1,AT1G13170.1,AT4G22540.1  
Phypa1|2611,Phypa1|2681,Phypa1|38105,Phypa1|5319  
Phypa1|24862,Phypa1|28090,Phypa1|29549,Phypa1|26604  
Phypa1|5318,Phypa1|7510,Phypa1|9712  
AT5G56130.1 Phypa1|39584  
AT2G47990.1 Phypa1|33143  
AT2G26350.1 Phypa1|37679  
AT4G28450.1 Phypa1|38042  
AT1G19750.1,AT1G27840.3 Phypa1|24900  
AT4G30350.1,AT5G57710.1 Phypa1|6542  
AT2G37990.1 Phypa1|34593  
Phypa1|15814  
AT1G49670.1 Phypa1|34017  
Phypa1|33816  
Phypa1|18837  
AT1G70590.1 Phypa1|1057  
AT4G09070.1,AT2G28230.1 Phypa1|37252  
AT4G29940.1 Phypa1|35104,Phypa1|8755  
AT1G21570.1 Phypa1|32310  
AT1G13160.1,AT4G31520.1 Phypa1|29749  
AT1G80760.1,AT4G10380.1 Phypa1|29502  
AT4G19030.1,AT4G18910.1,AT5G37810.1,AT5G37820.1 Phypa1|36937,Phypa1|24984,Phypa1|36382  
AT3G06100.1

AT1G31885.1,AT2G34390.1  
AT2G29870.1  
Phypa1|7725  
Phypa1|623  
AT4G36980.1 Phypa1|39573,Phypa1|6657  
AT5G58370.2 Phypa1|29618  
AT4G04885.1 Phypa1|19799,Phypa1|19798  
AT1G56000.1,AT1G55980.1 Phypa1|29112  
AT1G04730.1 Phypa1|3403  
AT1G60850.1,AT1G60620.1 Phypa1|23963  
AT3G50560.1 Phypa1|27988  
Phypa1|27521  
AT1G76020.1,AT1G20225.1 Phypa1|2065  
AT2G22570.1 Phypa1|25234  
AT5G61150.1 Phypa1|19747  
AT4G34730.1 Phypa1|1559  
AT5G27620.1 Phypa1|29544,Phypa1|26362  
AT5G09310.1 Phypa1|2164  
AT3G11964.1 Phypa1|27523  
AT1G17760.1 Phypa1|29925  
AT5G17510.1,AT3G03460.1 Phypa1|7438,Phypa1|3460  
AT4G29490.1 Phypa1|38738  
AT4G29500.1  
AT5G40550.1,AT3G27460.1 Phypa1|38139,Phypa1|36151  
AT1G75670.1 Phypa1|26677  
AT1G11880.1 Phypa1|26492  
AT1G54960.1,AT3G06030.1,AT1G09000.1 Phypa1|28325,Phypa1|28329,Phypa1|37651  
AT2G30040.1,AT1G07150.1 Phypa1|36124,Phypa1|27467,Phypa1|25244,Phypa1|148,Phypa1|147,Phypa1|601  
AT5G12480.1,AT5G19450.1,AT3G57530.1,AT2G41860.2  
Phypa1|17294,Phypa1|24431,Phypa1|23889,Phypa1|20129,Phypa1|3027,Phypa1|31527  
AT3G01090.2,AT3G29160.1 Phypa1|35984,Phypa1|38389  
AT5G56580.1 Phypa1|36523,Phypa1|38439  
AT1G69220.1 Phypa1|25611  
AT5G19360.1,AT5G12180.1,AT4G23650.1  
Phypa1|19279,Phypa1|39594,Phypa1|13985,Phypa1|38954,Phypa1|38956,Phypa1|36976  
AT5G35410.1 Phypa1|28962,Phypa1|39353  
AT5G04870.1,AT2G38910.1,AT3G10660.1  
Phypa1|34536,Phypa1|37591,Phypa1|37514,Phypa1|36516,Phypa1|26231,Phypa1|39264  
AT2G37840.1,AT3G53930.1 Phypa1|413,Phypa1|38149,Phypa1|32429  
AT1G63700.1,AT1G53570.1 Phypa1|538,Phypa1|1021,Phypa1|24839,Phypa1|125  
AT5G14720.1,AT1G79640.1,AT4G10730.1  
Phypa1|25505,Phypa1|24990,Phypa1|29219,Phypa1|25947,Phypa1|30554  
AT2G17890.1,AT4G36070.1,AT5G66210.1 Phypa1|39651,Phypa1|27099,Phypa1|16180,Phypa1|36872  
AT1G77720.1 Phypa1|29893,Phypa1|974  
AT3G06230.1,AT1G73500.1,AT1G18350.1 Phypa1|23905,Phypa1|38282  
AT3G44200.1 Phypa1|5737  
AT3G08720.1,AT3G08730.1 Phypa1|37132,Phypa1|27987,Phypa1|35955  
AT3G10540.1,AT5G04510.1 Phypa1|29091  
AT5G60550.1,AT3G45240.1 Phypa1|26496,Phypa1|27322  
AT5G40440.1 Phypa1|27319,Phypa1|14319  
AT1G30270.1,AT1G01140.3 Phypa1|23978,Phypa1|25087,Phypa1|6532,Phypa1|23822,Phypa1|36840  
AT5G66880.1,AT4G33950.1,AT3G50500.1 Phypa1|38979,Phypa1|37734,Phypa1|37660,Phypa1|23909  
AT1G02970.1 Phypa1|37556  
AT1G49580.1,AT3G19100.1,AT2G41140.1,AT3G56760.1,AT3G50530.1  
Phypa1|24364,Phypa1|24312,Phypa1|26540,Phypa1|23954  
AT5G20930.1 Phypa1|39471  
AT2G25880.1,AT4G32830.1 Phypa1|15624,Phypa1|37411  
AT2G43930.1  
AT5G27510.1,AT5G67080.1,AT2G42550.1,AT2G05060.1,AT5G12090.1,AT2G41930.1,AT2G41910.1,AT2G41920.1,A  
T3G50310.1,AT5G27790.1,AT2G34290.1  
AT3G45670.1,AT3G46160.1,AT5G55090.1,AT4G26890.1,AT3G45790.1,AT3G46140.1  
AT1G05100.1,AT2G32510.1  
AT1G18890.1,AT1G74740.1,AT3G51850.1  
AT2G31500.1  
AT5G39440.1  
AT4G29810.2,AT4G26070.3  
AT1G61950.1,AT1G50700.1,AT3G20410.1,AT1G76040.2,AT4G21940.1,AT4G04720.1,AT4G04740.1  
AT4G04695.1,AT4G04700.1  
AT4G04710.1  
AT4G24400.1  
AT2G35890.1  
AT1G12680.1,AT1G12580.1,AT4G35310.1  
AT1G08650.1,AT3G04530.1  
AT4G09570.1,AT5G23580.1,AT1G35670.1  
AT4G38230.1,AT2G17290.1  
AT3G61960.1  
AT1G49180.1  
AT2G40580.1,AT5G66850.1,AT2G40500.1,AT2G40560.1  
AT1G70430.1  
AT4G24100.1  
AT4G14480.1  
AT1G23700.1

AT1G51660.1,AT3G21220.1  
 AT1G32320.1  
 AT3G20860.1  
 AT3G63280.1,AT3G12200.1,AT3G04810.1,AT1G54510.1,AT5G28290.1  
 AT5G01820.1,AT2G38490.1,AT5G45820.1,AT5G21326.1,AT2G26980.4,AT1G29230.1,AT5G25110.1,AT4G30960.1,A  
 T5G58380.1,AT4G18700.1,AT5G01810.1,AT2G30360.1,AT5G45810.1,AT5G07070.1,AT2G34180.1,AT5G10930.1  
 AT3G17510.1,AT1G48260.1  
 AT5G57630.1  
 AT2G25090.1  
 AT5G57565.1  
 AT3G23000.1,AT4G14580.1  
 AT5G63650.1,AT5G08590.1,AT1G10940.1,AT1G60940.1  
 AT1G78290.1  
 AT2G23030.1  
 AT4G40010.1  
 AT5G24430.1,AT2G46700.1,AT3G49370.1  
 AT2G45490.1  
     Phypa1|30225  
     Phypa1|1393,Phypa1|24291  
     Phypa1|38953  
     Phypa1|27587  
     Phypa1|30177  
     Phypa1|1655  
     Phypa1|21131  
     Phypa1|43,Phypa1|37275,Phypa1|35341  
     Phypa1|28533  
     Phypa1|39218  
     Phypa1|15797,Phypa1|25767  
     Phypa1|34485  
     Phypa1|1455  
     Phypa1|21731  
     Phypa1|5736  
     Phypa1|26507,Phypa1|25840  
     Phypa1|26768  
     Phypa1|6656  
     Phypa1|18771,Phypa1|36285,Phypa1|1881  
     Phypa1|39339  
     Phypa1|38949  
 AT3G06720.1            Phypa1|37421,Phypa1|36682,Phypa1|26077,Phypa1|39211,Phypa1|39398  
 AT5G03070.1            Phypa1|28807,Phypa1|25710  
 AT1G02690.2,AT4G02150.1  
 AT4G16143.1,AT5G52000.1,AT3G05720.1,AT1G09270.1,AT5G49310.1  
 AT1G32880.1  
     Phypa1|39489  
 AT1G07950.1,AT1G16430.1            Phypa1|2185,Phypa1|2176  
 AT3G10670.1            Phypa1|23849,Phypa1|29362  
     Phypa1|31018  
 AT3G18940.1            Phypa1|27924  
 AT5G15550.1            Phypa1|35262  
 AT4G30820.1            Phypa1|3576  
 AT5G14260.1            Phypa1|28716,Phypa1|38626  
 AT1G01920.1            Phypa1|26123  
 AT1G20090.1,AT1G75840.1            Phypa1|39055,Phypa1|36530,Phypa1|37422,Phypa1|35050  
 AT3G51300.1,AT2G17800.1,AT4G35020.1,AT4G35950.1  
 AT4G28950.1  
 AT5G62880.1,AT3G48040.1  
 AT2G44690.1  
 AT5G45970.1  
 AT1G35620.1            Phypa1|26423,Phypa1|1876  
 AT5G58575.1            Phypa1|275  
     Phypa1|4766  
 AT5G22010.1            Phypa1|29190  
 AT1G61040.1            Phypa1|32790  
 AT4G33030.1            Phypa1|26479  
 AT5G59440.1            Phypa1|29173  
 AT3G57520.1,AT1G55740.1            Phypa1|38215,Phypa1|23681  
 AT5G40390.1,AT4G01970.1,AT5G20250.1  
 AT4G01265.1  
 AT1G31480.1            Phypa1|36789  
 AT3G09850.1            Phypa1|34670  
 AT5G24850.1            Phypa1|38140  
 AT2G47590.1            Phypa1|500,Phypa1|29466  
 AT2G34260.1            Phypa1|1959  
 AT1G65030.1            Phypa1|28037  
 AT4G04940.1            Phypa1|34678  
 AT1G09770.1            Phypa1|39790  
 AT5G52560.1            Phypa1|37813  
     Phypa1|24441  
 AT4G18120.1,AT1G29400.1            Phypa1|29616,Phypa1|26972,Phypa1|38795  
 AT1G67770.1,AT3G26120.1            Phypa1|50,Phypa1|468  
 AT5G07290.1,AT2G42890.1,AT5G61960.1  
 AT1G37140.1

AT5G07930.1  
 AT1G08190.1 Phypa1|33743  
     Phypa1|16364  
 AT3G26340.1,AT1G13060.1 Phypa1|24385,Phypa1|36406  
 AT1G56450.1 Phypa1|24120  
     Phypa1|4018  
 AT1G06470.1 Phypa1|24300  
     Phypa1|12233,Phypa1|5704  
 AT3G55340.1 Phypa1|29469  
 AT4G16210.1 Phypa1|29022,Phypa1|36674  
 AT4G32140.1 Phypa1|24576,Phypa1|26451  
 AT3G07080.1 Phypa1|37503  
 AT2G43950.1 Phypa1|35966,Phypa1|35920  
 AT1G31910.1 Phypa1|36821  
 AT3G60370.1 Phypa1|26323  
 AT3G10060.1 Phypa1|1136  
 AT3G55520.1 Phypa1|1624  
     Phypa1|1624  
 AT1G54830.1,AT3G48590.1,AT1G56170.1,AT1G08970.1,AT5G63470.1 Phypa1|316,Phypa1|26270  
 AT5G50490.1,AT5G27910.1,AT5G50480.1,AT5G50470.1  
     Phypa1|300,Phypa1|834,Phypa1|29955,Phypa1|2366  
 AT1G31870.1 Phypa1|2705  
 AT2G43210.1 Phypa1|34156  
 AT4G12790.1 Phypa1|37712  
 AT5G22370.1 Phypa1|2874  
 AT3G53090.1 Phypa1|27540,Phypa1|29539,Phypa1|25066  
 AT1G06720.1 Phypa1|37385  
     Phypa1|14776  
 AT5G10070.2 Phypa1|675  
 AT2G40360.1 Phypa1|24476  
 AT4G27730.1,AT5G53510.1,AT4G10770.1,AT5G53520.1 Phypa1|38879  
 AT5G64410.1,AT1G09930.1  
 AT5G55930.1,AT4G26590.1  
 AT4G16370.1  
     Phypa1|14074  
 AT2G30910.1,AT2G31300.1 Phypa1|38285,Phypa1|32043  
 AT4G37130.1 Phypa1|10076  
 AT1G13120.1 Phypa1|29968  
 AT5G65960.1 Phypa1|36232  
 AT5G12200.1 Phypa1|27509  
     Phypa1|30906  
 AT2G18990.1,AT3G25580.1 Phypa1|38988  
 AT5G06240.1 Phypa1|775  
 AT4G37190.1 Phypa1|25581  
 AT3G53260.1,AT2G37040.1,AT3G10340.1,AT5G04230.1  
     Phypa1|26072,Phypa1|36187,Phypa1|25836,Phypa1|36169,Phypa1|36450,Phypa1|36538,Phypa1|21817,  
 Phypa1|36317,Phypa1|26078,Phypa1|24625,Phypa1|30930  
     Phypa1|1195,Phypa1|39764,Phypa1|3052  
     Phypa1|30571,Phypa1|2769  
     Phypa1|30568  
     Phypa1|11761  
     Phypa1|31059  
     Phypa1|5024  
     Phypa1|1188  
     Phypa1|21046  
 AT2G43470.1 Phypa1|28666  
 AT3G03320.1  
 AT1G12520.1 Phypa1|38313,Phypa1|30699  
     Phypa1|1590  
 AT1G08030.1 Phypa1|3872  
 AT1G53520.1 Phypa1|26693  
 AT3G53490.1 Phypa1|38696,Phypa1|24695  
 AT5G02720.1  
 AT4G25670.1,AT4G25690.1 Phypa1|34771  
 AT5G52550.1  
 AT5G51450.1,AT4G25230.1 Phypa1|36790,Phypa1|24582  
 AT5G41960.1 Phypa1|25722  
 AT5G51830.1,AT1G66430.1 Phypa1|26348,Phypa1|29411,Phypa1|37188,Phypa1|29664,Phypa1|25847  
 AT3G54090.1 Phypa1|28735  
 AT3G59480.1,AT4G10260.1  
 AT1G69200.1  
     Phypa1|22135  
     Phypa1|23724,Phypa1|2576,Phypa1|38230  
 AT5G58740.1 Phypa1|37310  
 AT3G52640.2 Phypa1|36606  
 AT5G24840.1 Phypa1|28865  
 AT2G35450.1 Phypa1|38157  
 AT2G41705.1 Phypa1|29694,Phypa1|29874  
 AT5G67170.1 Phypa1|28933,Phypa1|33495  
 AT5G24260.1 Phypa1|23817,Phypa1|23685  
 AT3G59090.2 Phypa1|32866,Phypa1|32113,Phypa1|34419  
 AT5G12290.1 Phypa1|35275,Phypa1|28487



AT5G09390.1 Phypa1|35155  
AT1G26550.1 Phypa1|37656  
Phypa1|28968  
AT5G19370.1 Phypa1|28471  
AT3G06455.1,AT4G01000.1 Phypa1|33891  
AT1G51350.1 Phypa1|25405,Phypa1|37521  
AT3G46510.1,AT2G28830.1 Phypa1|37334  
AT5G65200.1,AT3G47820.1,AT5G40140.1,AT5G62560.1 Phypa1|30248  
AT3G19380.1,AT1G49780.1 Phypa1|1430,Phypa1|26701,Phypa1|16244,Phypa1|37565  
AT4G21350.1,AT2G25130.1,AT2G23140.1,AT4G36550.1,AT5G42340.1,AT5G58680.1,AT1G67530.1,AT1G29340.1,AT1G10560.1,AT1G27910.1,AT1G71020.1,AT5G14510.1,AT5G67340.1,AT3G54850.1,AT4G31890.1,AT3G54790.1,AT1G24330.1,AT3G03440.1,AT3G01400.1,AT1G23030.1,AT5G18320.1,AT1G08315.1,AT5G01830.1,AT3G07360.1,AT1G60190.1  
Phypa1|26287,Phypa1|7773,Phypa1|157,Phypa1|32913,Phypa1|27422,Phypa1|30167,Phypa1|36137,Phypa1|25800,Phypa1|4056,Phypa1|30972,Phypa1|2746,Phypa1|29397,Phypa1|27639,Phypa1|36997,Phypa1|444,Phypa1|929,Phypa1|26981,Phypa1|29876,Phypa1|373,Phypa1|30325,Phypa1|29296  
AT2G45920.1  
AT4G16490.1  
AT3G18710.1,AT5G09800.1,AT5G64660.1  
AT3G49810.1,AT5G65920.1  
AT1G01680.1  
AT5G18330.1,AT5G18340.1  
AT1G15165.1  
AT1G01670.1  
AT4G12710.1  
Phypa1|1318  
Phypa1|598  
Phypa1|35325  
Phypa1|3339  
Phypa1|36020,Phypa1|36454  
Phypa1|4358  
AT4G38520.1,AT3G55050.1,AT5G66080.1,AT3G51370.1,AT3G12620.1  
Phypa1|37603,Phypa1|38307,Phypa1|23919,Phypa1|24231,Phypa1|36040  
AT4G33920.1  
AT3G17090.1  
AT5G06750.1  
AT5G02760.1  
AT5G14140.1 Phypa1|1099  
Phypa1|4738  
AT1G29700.1 Phypa1|29447  
Phypa1|14927  
AT2G03440.1,AT1G13930.1 Phypa1|33678,Phypa1|31930  
AT1G72050.2 Phypa1|1935  
AT5G08335.1,AT5G23320.1 Phypa1|27696  
AT5G59410.1,AT2G29020.1 Phypa1|2952,Phypa1|23986  
AT3G17340.1 Phypa1|19998,Phypa1|16762,Phypa1|35179  
AT5G14640.1,AT3G05840.1,AT5G26751.1  
Phypa1|33089,Phypa1|37910,Phypa1|38659,Phypa1|38764,Phypa1|37909,Phypa1|23809  
AT1G09840.1,AT1G57870.1  
AT4G18710.1,AT2G30980.1,AT1G06390.1  
AT3G61160.2,AT4G00720.1  
Phypa1|3036  
AT1G26170.1 Phypa1|26409  
AT3G17000.1 Phypa1|30555  
AT2G04305.1 Phypa1|36876,Phypa1|30302  
AT4G35250.1 Phypa1|37415  
AT4G37200.1 Phypa1|29435  
AT1G29220.1 Phypa1|4635,Phypa1|35223  
AT2G39940.1 Phypa1|35169,Phypa1|37619,Phypa1|37290,Phypa1|25386  
AT3G62980.1,AT3G26810.1,AT4G03190.1,AT1G12820.1  
Phypa1|23714,Phypa1|36455,Phypa1|37263,Phypa1|37551  
AT4G24390.1,AT5G49980.1  
Phypa1|31802  
Phypa1|1732,Phypa1|1806,Phypa1|36515  
Phypa1|35940  
AT3G56430.1,AT2G40800.1 Phypa1|1046,Phypa1|2283  
AT3G57000.1 Phypa1|1989  
AT1G53140.1 Phypa1|24610  
Phypa1|16275  
AT3G17300.1 Phypa1|4037  
AT1G03360.1 Phypa1|32988  
AT5G41950.1 Phypa1|29246,Phypa1|13114  
AT5G02120.1 Phypa1|25700,Phypa1|24908  
AT2G27290.1 Phypa1|25764  
AT2G44510.1,AT5G03830.1 Phypa1|39221  
AT3G58580.1,AT3G58560.1 Phypa1|37970,Phypa1|24083,Phypa1|3057,Phypa1|23894  
AT1G73875.1 Phypa1|26497,Phypa1|29385  
AT1G31500.1 Phypa1|24930  
AT3G18500.1  
AT5G11350.1  
AT1G31530.1  
Phypa1|15561

AT4G01810.1 Phypa1|36672,Phypa1|28860  
AT2G45620.1 Phypa1|37244  
AT5G10940.1 Phypa1|29770  
AT1G56500.1 Phypa1|26809  
Phypa1|603  
AT3G04680.1 Phypa1|25489  
AT5G39930.1  
AT4G09140.1 Phypa1|26473  
Phypa1|31241  
AT2G04660.1 Phypa1|36305  
AT3G03920.1,AT5G18180.1 Phypa1|34866,Phypa1|27983  
AT5G12380.1,AT5G10220.1,AT2G38760.1,AT5G65020.1,AT5G10230.1,AT1G35720.1  
Phypa1|35922,Phypa1|26572,Phypa1|25871,Phypa1|35968,Phypa1|33717,Phypa1|7287  
AT1G68090.1  
AT4G14490.1 Phypa1|331,Phypa1|1270  
AT5G15750.1 Phypa1|761  
AT5G01310.1 Phypa1|27036  
AT1G05720.1 Phypa1|39609  
AT3G04740.1 Phypa1|28908  
Phypa1|28903  
AT3G12940.1 Phypa1|4167,Phypa1|26490,Phypa1|28614,Phypa1|26992  
AT3G52120.1 Phypa1|24452  
Phypa1|17295  
AT2G16930.1,AT5G15220.1 Phypa1|28593  
AT1G06070.1,AT2G31370.1  
Phypa1|25253,Phypa1|1934,Phypa1|3745,Phypa1|26814,Phypa1|36162,Phypa1|38148  
AT2G21230.1,AT4G38900.1  
AT2G13150.1,AT2G12900.1,AT1G43700.1,AT2G12940.1  
AT2G40620.1,AT1G06850.1  
AT2G21235.1  
AT5G07360.1 Phypa1|28520,Phypa1|36061  
Phypa1|18461  
AT3G27700.1 Phypa1|21861,Phypa1|32710,Phypa1|14968  
AT5G57040.1 Phypa1|29223,Phypa1|28890  
AT4G08960.1 Phypa1|27674,Phypa1|29202  
AT5G20090.1 Phypa1|25635  
AT4G31770.1 Phypa1|27506  
AT4G25890.1,AT5G57290.1 Phypa1|39216,Phypa1|37801  
AT4G12670.1,AT1G01150.1,AT5G03780.1 Phypa1|3467,Phypa1|7446  
AT5G40280.1 Phypa1|27941  
AT4G35930.1 Phypa1|32627,Phypa1|32159,Phypa1|31998,Phypa1|1540  
AT5G35460.1 Phypa1|545,Phypa1|1909  
AT4G37300.1 Phypa1|776,Phypa1|38986  
AT5G45900.1 Phypa1|26868  
AT3G17205.1 Phypa1|37463  
AT1G55860.1,AT1G70320.1 Phypa1|28147,Phypa1|7719  
Phypa1|37702  
Phypa1|23789  
Phypa1|26709,Phypa1|29578  
AT5G22100.1 Phypa1|23837  
AT1G26940.1 Phypa1|696  
AT2G20310.1,AT4G28690.1 Phypa1|32712  
AT1G71440.1 Phypa1|2936  
Phypa1|28068  
AT2G25605.1 Phypa1|39229  
Phypa1|3838  
AT1G08460.1 Phypa1|37296  
AT1G45110.1 Phypa1|24813  
AT5G47790.1 Phypa1|26787  
AT1G29030.1,AT2G34040.1 Phypa1|26185  
AT3G19516.1  
AT5G01960.1 Phypa1|25302  
AT4G33540.1 Phypa1|36044  
AT3G04870.1 Phypa1|28314,Phypa1|37620,Phypa1|2977  
AT1G03760.1 Phypa1|13937  
AT3G45400.1,AT3G03650.1,AT1G74680.1  
Phypa1|25567,Phypa1|999,Phypa1|37959,Phypa1|23795,Phypa1|992,Phypa1|38941,Phypa1|2895  
AT5G16890.1 Phypa1|25742  
AT1G67410.1 Phypa1|19121,Phypa1|24024,Phypa1|38266  
AT5G44930.1,AT2G35100.1  
AT1G34270.1  
AT4G30790.1 Phypa1|26826,Phypa1|29836  
AT5G17550.1,AT3G03490.1 Phypa1|350  
AT4G30870.1,AT5G39770.1 Phypa1|36097  
AT5G20600.1 Phypa1|37999  
Phypa1|34118  
AT2G19880.1 Phypa1|37544  
AT2G21860.1 Phypa1|39593  
AT2G47980.1 Phypa1|28904  
AT3G19990.1 Phypa1|33255  
AT1G01430.1,AT5G15890.1,AT4G23790.1,AT1G70230.1,AT4G11090.1,AT4G01080.1  
Phypa1|30098,Phypa1|107,Phypa1|35911,Phypa1|28367,Phypa1|3409,Phypa1|27593,Phypa1|25362

AT1G48880.1 Phypa1|1431  
AT5G51640.1,AT4G25360.1 Phypa1|30633  
AT2G37720.1,AT5G64020.1,AT5G20680.1 Phypa1|24771,Phypa1|37022  
AT3G06080.2,AT5G19160.1 Phypa1|86,Phypa1|85,Phypa1|991,Phypa1|496,Phypa1|91  
AT5G64470.2 Phypa1|29820  
AT3G28150.1,AT5G15900.1  
AT3G02440.1  
AT3G54260.1  
AT2G34070.1,AT3G14850.2,AT3G12060.1,AT5G01360.1,AT2G30900.1,AT2G31110.1,AT5G58600.1,AT2G30010.1,AT5G49340.1,AT3G62390.1,AT5G06700.1,AT1G78710.1,AT2G42570.1,AT1G29050.1  
AT5G20590.1,AT1G60790.1  
AT5G01620.1,AT3G55990.1,AT2G40150.1,AT1G73140.1,AT2G40320.1,AT2G40160.1,AT2G38320.1,AT3G11030.1  
AT3G11570.1,AT5G06230.1  
AT2G31120.1  
AT2G14530.1  
AT1G02170.1 Phypa1|26657  
AT4G17080.1,AT1G21920.1,AT2G35170.1,AT1G77660.1 Phypa1|27492  
AT4G25110.1  
AT5G64240.2  
Phypa1|25134  
AT1G02330.1 Phypa1|38251,Phypa1|26007  
AT5G59180.1 Phypa1|35127  
Phypa1|32045  
AT3G07140.1 Phypa1|38084  
AT3G04490.1 Phypa1|29683  
Phypa1|35412  
AT3G23700.1 Phypa1|27424,Phypa1|29594  
AT4G19490.1 Phypa1|27886  
AT2G37740.1 Phypa1|24881,Phypa1|25936,Phypa1|24393,Phypa1|24345,Phypa1|24656,Phypa1|29861  
AT5G43540.1,AT3G53820.1,AT3G09290.1  
AT5G06070.1,AT3G23130.1  
AT4G17810.1  
AT2G42410.1  
AT3G23140.1  
AT1G70630.1 Phypa1|25287  
Phypa1|39164  
AT5G16210.1 Phypa1|25678,Phypa1|36320,Phypa1|1749  
AT5G41685.1,AT1G64220.1 Phypa1|36699,Phypa1|38461  
AT1G18000.1,AT1G18010.1 Phypa1|25133  
AT5G08290.1 Phypa1|39123  
AT2G47830.1 Phypa1|39457,Phypa1|33618  
Phypa1|21383,Phypa1|31288  
AT1G51610.1 Phypa1|28344  
AT3G20510.1,AT1G50740.1 Phypa1|34754  
AT3G15090.1 Phypa1|35032  
AT4G13010.1 Phypa1|26150  
AT1G23740.1 Phypa1|30557  
Phypa1|4000,Phypa1|15357,Phypa1|24268,Phypa1|24367  
Phypa1|39508,Phypa1|11206,Phypa1|37169  
Phypa1|23534  
Phypa1|20314  
Phypa1|3004  
Phypa1|19382  
Phypa1|26184  
Phypa1|12672  
AT2G25530.1 Phypa1|38777  
Phypa1|35725  
AT3G51820.1 Phypa1|24626  
AT1G67680.1,AT1G67650.1 Phypa1|37716  
AT5G02280.1 Phypa1|36923,Phypa1|24017  
AT4G34310.1 Phypa1|32191  
Phypa1|5251  
AT3G18580.1 Phypa1|26624,Phypa1|25070,Phypa1|28853  
AT4G28200.1 Phypa1|26026  
AT4G20280.1,AT1G20000.1 Phypa1|29588  
AT3G15040.1 Phypa1|35565,Phypa1|26870  
AT2G34340.1,AT4G18980.1,AT1G29640.1,AT5G45630.1  
AT2G28400.1,AT3G45210.1,AT5G03230.1,AT5G60680.1  
AT1G61930.1,AT4G21930.1,AT1G11700.1,AT4G04630.1  
AT4G21970.1  
AT4G26950.1  
AT2G43980.1 Phypa1|30063  
Phypa1|8141  
AT2G36930.1 Phypa1|32530  
AT5G65810.1,AT3G49720.1 Phypa1|26778  
AT3G59520.1 Phypa1|36123  
Phypa1|15019  
AT5G53620.1 Phypa1|15213  
Phypa1|34358  
AT3G28700.1 Phypa1|38993  
AT5G19430.1,AT5G12310.1 Phypa1|30257  
AT5G15270.1,AT1G14170.1 Phypa1|1399

AT5G64390.1,AT1G51580.1  
AT2G22600.1,AT5G09560.1,AT5G46190.1  
AT2G03110.1,AT5G53060.1  
AT5G44730.1 Phypa1|24696,Phypa1|26662  
Phypa1|30831  
AT3G48150.1 Phypa1|27038  
AT5G23120.1 Phypa1|28793,Phypa1|32143  
AT5G35330.1,AT5G35338.2 Phypa1|29636  
AT5G10910.1 Phypa1|1866  
Phypa1|30933  
AT2G40190.1 Phypa1|37817  
AT3G24290.1,AT4G28700.1,AT3G24300.1,AT1G64780.1,AT4G13510.1  
Phypa1|35834,Phypa1|25681,Phypa1|38443,Phypa1|24143,Phypa1|36325,Phypa1|38159  
Phypa1|30442  
AT1G22660.1 Phypa1|925  
AT3G45880.1 Phypa1|38413  
AT1G28320.1 Phypa1|34564  
AT2G26840.1 Phypa1|36511  
AT3G43910.1  
AT1G19080.1 Phypa1|38638  
AT4G01660.1 Phypa1|31851  
AT3G05210.1 Phypa1|529,Phypa1|27788  
AT4G21570.1,AT1G11200.1 Phypa1|24022  
AT5G14390.1,AT4G24760.1,AT3G01690.1,AT3G30380.1 Phypa1|23922  
AT1G66900.1,AT5G38220.1  
AT4G31020.1,AT2G24320.1  
AT1G13610.1  
AT1G32190.1  
AT2G30330.1 Phypa1|38212  
AT3G55390.1 Phypa1|37488,Phypa1|27807,Phypa1|36589  
AT3G04600.1 Phypa1|25332  
AT1G71820.1 Phypa1|36356  
AT4G25370.1,AT4G12060.1 Phypa1|25702,Phypa1|24911  
AT4G10330.1 Phypa1|17001  
Phypa1|15954  
AT5G07590.1 Phypa1|32161,Phypa1|26330,Phypa1|36795  
AT2G45040.1,AT1G70170.1,AT1G59970.1,AT4G16640.1 Phypa1|1951  
Phypa1|1949  
AT1G17160.1 Phypa1|37474,Phypa1|553  
AT4G27600.1 Phypa1|38723,Phypa1|29192,Phypa1|26762  
AT5G50970.1,AT5G19920.1 Phypa1|27021  
AT1G75200.1 Phypa1|28751  
AT3G28720.1 Phypa1|30137  
Phypa1|19460  
AT5G41820.1,AT4G24490.1 Phypa1|34033  
AT1G74970.1 Phypa1|27979,Phypa1|34611  
AT4G33250.1 Phypa1|24473,Phypa1|28546  
AT5G58730.1 Phypa1|26129,Phypa1|35932,Phypa1|621  
AT3G15830.1,AT3G15820.1 Phypa1|28538,Phypa1|38672  
AT3G52730.1 Phypa1|24141  
AT1G18600.1,AT1G74140.1,AT1G74130.1 Phypa1|2346  
AT1G42440.1 Phypa1|25593  
AT1G30240.1 Phypa1|34497,Phypa1|31681  
AT5G15390.1 Phypa1|1453,Phypa1|1946  
AT5G65000.1 Phypa1|28892  
AT3G09030.1 Phypa1|23687  
AT5G41330.1  
AT5G51200.1 Phypa1|28925  
Phypa1|33614  
AT3G11270.1,AT5G05780.1 Phypa1|37560  
AT4G01310.1 Phypa1|25283,Phypa1|30268  
Phypa1|31268  
AT4G22300.1 Phypa1|28792  
AT5G19180.1 Phypa1|39562,Phypa1|39408  
AT2G21470.2 Phypa1|8710,Phypa1|28871  
AT5G37530.1 Phypa1|38465  
AT4G16440.1 Phypa1|29326  
AT5G58290.1 Phypa1|25838,Phypa1|39149,Phypa1|33403,Phypa1|34968  
AT5G64580.1 Phypa1|37325  
AT5G42270.1,AT1G50250.1 Phypa1|26115,Phypa1|38216  
AT3G04340.1 Phypa1|37681,Phypa1|37402  
AT1G07510.1,AT2G29080.1 Phypa1|36403,Phypa1|35500,Phypa1|39742  
AT1G53750.1 Phypa1|39165,Phypa1|32856  
AT4G23940.1 Phypa1|37070,Phypa1|36043  
AT2G26140.1 Phypa1|37482,Phypa1|36209  
AT1G09100.1,AT3G05530.1 Phypa1|19778,Phypa1|29111  
AT5G58870.1,AT3G47060.1 Phypa1|24830  
AT4G04180.1 Phypa1|36870  
AT2G20140.1,AT4G29040.1 Phypa1|37075,Phypa1|24567,Phypa1|36048  
AT5G53170.1 Phypa1|36008  
AT2G30950.1,AT1G06430.1 Phypa1|27801,Phypa1|24791,Phypa1|34184  
AT1G79560.1 Phypa1|7730

AT3G15120.1 Phypa1|1514  
 AT3G16290.1 Phypa1|38695  
 AT3G02450.1 Phypa1|39314  
 AT5G43010.1,AT1G45000.1 Phypa1|38880,Phypa1|23796,Phypa1|38246  
 AT5G20000.1,AT5G19990.1 Phypa1|34976  
 AT1G53780.1  
 AT5G15250.1  
 Phypa1|30583  
 Phypa1|23560  
 Phypa1|17699  
 Phypa1|35773  
 Phypa1|30039  
 Phypa1|35106,Phypa1|28691  
 Phypa1|23012  
 Phypa1|7729  
 Phypa1|31456  
 AT1G73930.1 Phypa1|17131,Phypa1|32781  
 AT2G32330.1 Phypa1|34036  
 AT2G31580.1  
 AT2G32320.1  
 AT2G29630.1 Phypa1|30534,Phypa1|2732  
 Phypa1|21382  
 AT1G35170.1,AT1G35180.1,AT1G45010.1 Phypa1|26055  
 AT4G02220.1 Phypa1|38227,Phypa1|16771  
 AT5G43720.1,AT1G04230.1 Phypa1|24298  
 AT3G03890.1 Phypa1|24283  
 AT1G50575.1 Phypa1|26750  
 AT3G25730.1,AT1G13260.1,AT1G68840.1,AT1G25560.1 Phypa1|1930,Phypa1|26612  
 AT2G36080.1,AT5G06250.1,AT3G11580.1,AT1G01030.1,AT3G61970.1,AT2G46870.1  
 AT1G51120.1,AT1G50680.1  
 AT4G01500.1  
 AT3G11240.1,AT5G05700.1 Phypa1|37968  
 AT3G21820.1 Phypa1|25878  
 AT5G26800.1,AT3G05810.1 Phypa1|35204  
 AT1G01210.1,AT4G07950.1 Phypa1|36874  
 AT5G63460.1 Phypa1|1187  
 AT3G07400.1 Phypa1|24851  
 AT2G42190.1,AT3G57930.1 Phypa1|32656  
 AT3G06320.1,AT5G18790.1 Phypa1|39679  
 AT3G01740.1,AT5G14290.1 Phypa1|1276  
 AT1G27595.1 Phypa1|27127  
 AT5G01400.1  
 AT5G08420.1 Phypa1|27491  
 AT3G02370.1,AT3G57360.1 Phypa1|27379  
 AT5G18580.1 Phypa1|15494  
 AT1G43860.1 Phypa1|37808  
 AT2G25840.2 Phypa1|3934  
 Phypa1|31297,Phypa1|30483  
 AT4G14147.1 Phypa1|34660  
 AT1G09450.1 Phypa1|29103  
 AT1G77710.1 Phypa1|34944  
 AT3G22980.1 Phypa1|36729  
 AT1G06220.1,AT5G25230.1 Phypa1|23910,Phypa1|24000  
 AT1G56070.1 Phypa1|24108,Phypa1|39716,Phypa1|37276,Phypa1|39107  
 Phypa1|39796  
 Phypa1|15774  
 Phypa1|39106  
 AT3G21580.2 Phypa1|38271  
 AT3G11470.1 Phypa1|27327  
 AT1G73820.1 Phypa1|39256,Phypa1|38070,Phypa1|32846  
 AT5G21920.1 Phypa1|2174,Phypa1|30746  
 AT5G03345.1 Phypa1|34314,Phypa1|35129  
 AT3G19170.1,AT1G49630.1 Phypa1|38749  
 AT2G32760.1 Phypa1|35120  
 AT5G55490.1 Phypa1|27880  
 AT1G50410.1,AT1G61140.1,AT3G20010.1 Phypa1|24521,Phypa1|39074  
 AT5G22750.1 Phypa1|23786  
 AT1G11100.1  
 AT3G16600.1,AT1G05120.1  
 AT5G43530.1  
 AT1G02670.1  
 Phypa1|4850  
 AT5G46390.2 Phypa1|39295,Phypa1|26023  
 AT5G08740.1 Phypa1|27513  
 Phypa1|23565  
 AT5G20070.1 Phypa1|24294  
 AT5G48545.1 Phypa1|27673  
 AT3G24315.1 Phypa1|32969,Phypa1|13172  
 AT1G26520.1 Phypa1|25036  
 AT1G15730.1,AT1G80480.1 Phypa1|1409  
 Phypa1|23394  
 Phypa1|22862

Phypa1|32091  
Phypa1|6630  
AT1G08110.4 Phypa1|23914,Phypa1|3059  
Phypa1|6365  
AT1G79500.1,AT1G16340.1 Phypa1|24127  
Phypa1|23625  
AT2G04700.1 Phypa1|36057  
Phypa1|1211  
AT1G63610.2 Phypa1|37597,Phypa1|25620  
AT5G39600.1 Phypa1|38412  
AT3G11980.1 Phypa1|25643,Phypa1|440  
AT5G22500.1,AT4G33790.1,AT3G44540.1,AT3G44560.1,AT3G44550.1  
AT5G22420.1,AT3G56700.1  
Phypa1|15526  
AT4G03240.1 Phypa1|293  
AT1G68820.1,AT1G18470.1,AT1G73950.1 Phypa1|2715  
AT1G34355.1 Phypa1|35847,Phypa1|31907,Phypa1|33179  
AT1G61790.1,AT1G11560.1 Phypa1|24101,Phypa1|2959,Phypa1|25443  
AT5G61970.1 Phypa1|37829  
AT3G11220.1 Phypa1|17470  
AT4G21190.1 Phypa1|2049  
AT1G04590.2  
AT5G46020.1 Phypa1|32533  
AT1G48420.1 Phypa1|29175  
AT3G26115.2 Phypa1|27480  
AT1G59520.1 Phypa1|26664  
AT1G73940.1,AT5G49410.1 Phypa1|2198,Phypa1|1235  
AT1G67630.1 Phypa1|28243  
AT3G12680.1,AT5G63260.1,AT3G48440.1,AT1G04990.1,AT2G32930.1,AT2G47850.1 Phypa1|27183  
AT5G16540.1,AT3G02830.1 Phypa1|508  
AT5G18550.1,AT3G06410.1  
AT1G29600.1  
Phypa1|524  
Phypa1|1309,Phypa1|1308  
AT5G19910.1 Phypa1|731  
AT3G09090.1 Phypa1|35437  
AT1G17040.1,AT1G78540.1 Phypa1|25998  
Phypa1|6622  
AT1G03330.1 Phypa1|37980  
AT5G14105.1 Phypa1|26996,Phypa1|25518  
AT2G45270.1 Phypa1|37000  
Phypa1|31224  
AT5G64250.2 Phypa1|39388  
Phypa1|19357  
AT1G17850.1 Phypa1|507  
AT3G54220.1 Phypa1|30072,Phypa1|1385,Phypa1|961  
AT3G49950.1 Phypa1|23773,Phypa1|37316  
AT5G48150.1,AT2G04890.1,AT1G50600.1 Phypa1|38123,Phypa1|3019  
AT1G55580.1 Phypa1|29319,Phypa1|12693  
AT4G37650.1 Phypa1|996,Phypa1|530  
AT3G13840.1 Phypa1|36879,Phypa1|64,Phypa1|26833,Phypa1|12740  
AT1G50420.1 Phypa1|37204,Phypa1|36842  
AT1G63100.1 Phypa1|1838,Phypa1|36683  
AT1G66350.1,AT3G03450.1,AT5G17490.1,AT2G01570.1,AT1G14920.1 Phypa1|2901,Phypa1|38228  
AT2G37650.1,AT2G29060.1,AT1G07520.1,AT1G07530.1,AT5G59450.1  
Phypa1|11634,Phypa1|39641,Phypa1|29052,Phypa1|28715,Phypa1|23873,Phypa1|36161,Phypa1|30275  
AT3G50650.1,AT5G66770.1 Phypa1|38027,Phypa1|493  
AT5G41920.1  
AT5G67411.1  
AT4G17230.1  
AT1G21450.1  
AT5G52510.1  
AT3G46600.1  
AT4G08250.1  
Phypa1|39064,Phypa1|25628,Phypa1|25166  
Phypa1|29984  
Phypa1|5119  
Phypa1|18545  
Phypa1|39212  
Phypa1|28966  
Phypa1|2981  
Phypa1|36296,Phypa1|37202  
AT1G31360.1 Phypa1|27339  
AT1G10930.1,AT1G60930.1 Phypa1|20  
AT1G27880.1 Phypa1|29258  
AT3G05740.1  
AT4G35740.1  
Phypa1|33961  
Phypa1|1118  
Phypa1|21560  
AT5G22110.1 Phypa1|39057  
AT1G72030.1 Phypa1|1992

AT2G21385.1 Phypa1|29656  
 AT1G17330.1 Phypa1|24404  
 AT5G05930.1 Phypa1|35097,Phypa1|29854  
 AT3G18630.1 Phypa1|30844  
 AT3G60190.1,AT2G44590.3,AT1G14830.1  
 Phypa1|34255,Phypa1|38961,Phypa1|37894,Phypa1|14809,Phypa1|32423  
 AT2G14120.1,AT4G33650.1 Phypa1|28769,Phypa1|26246,Phypa1|27069,Phypa1|34801  
 AT5G42080.1,AT3G61760.1  
 Phypa1|7619  
 Phypa1|33700  
 AT4G32770.1 Phypa1|28007,Phypa1|31689  
 AT5G13420.1 Phypa1|23955  
 Phypa1|6047  
 AT1G15390.1 Phypa1|25901,Phypa1|25310  
 AT5G37850.1 Phypa1|2420,Phypa1|23829  
 AT5G60340.1 Phypa1|36537  
 AT2G43760.1 Phypa1|26317  
 Phypa1|30728  
 AT5G37600.1,AT5G16570.1,AT3G17820.1,AT1G66200.1  
 Phypa1|24087,Phypa1|37995,Phypa1|32020,Phypa1|24133  
 AT5G35630.1  
 AT1G48470.1  
 Phypa1|38545  
 AT1G60430.1 Phypa1|36486,Phypa1|34041  
 AT1G53490.1 Phypa1|27748  
 AT5G51720.1 Phypa1|20350,Phypa1|338  
 AT3G56510.1 Phypa1|24230  
 AT3G60210.1,AT2G44650.1 Phypa1|30199,Phypa1|17971  
 AT5G14910.1 Phypa1|33050,Phypa1|32311,Phypa1|34097  
 AT4G38020.1 Phypa1|36424  
 Phypa1|22303  
 AT3G60070.1 Phypa1|37047  
 AT2G44280.1  
 AT1G53345.1 Phypa1|37519  
 AT5G09580.1  
 AT4G18790.1,AT1G47240.1,AT2G23150.1,AT5G67330.1 Phypa1|31495,Phypa1|24383,Phypa1|28150  
 AT1G15960.1,AT1G80830.1  
 Phypa1|11894  
 AT1G09150.1 Phypa1|37642  
 AT4G00450.1 Phypa1|25135,Phypa1|37623,Phypa1|4555  
 AT1G67700.2 Phypa1|27004  
 AT5G19050.1 Phypa1|39267  
 AT5G16550.1 Phypa1|33542  
 Phypa1|35124  
 AT2G42120.1 Phypa1|14595  
 AT5G13190.1 Phypa1|818  
 AT2G25280.1 Phypa1|25600,Phypa1|2632  
 AT4G10760.1 Phypa1|1765  
 AT1G06240.1 Phypa1|28719  
 AT2G44850.1 Phypa1|29126,Phypa1|27289  
 AT2G44525.1,AT3G60150.1 Phypa1|39435  
 AT4G18230.1 Phypa1|28872  
 AT1G62850.1 Phypa1|20232  
 AT5G62030.1 Phypa1|36713  
 AT4G32910.1 Phypa1|27955  
 AT2G25080.1,AT1G63460.1,AT4G31870.1,AT4G11600.1 Phypa1|27759,Phypa1|36985  
 AT2G31570.1,AT2G43350.1  
 AT3G63080.1,AT2G48150.1  
 Phypa1|3078,Phypa1|23651  
 Phypa1|29935  
 Phypa1|29810  
 AT3G05040.1 Phypa1|28118,Phypa1|30125  
 AT4G39820.1 Phypa1|26477,Phypa1|37837,Phypa1|28318,Phypa1|29828  
 AT2G18290.1 Phypa1|26061  
 AT5G19940.1 Phypa1|28069  
 AT3G56750.1,AT2G41150.2 Phypa1|1016  
 AT5G07630.1 Phypa1|25215  
 AT3G02710.1 Phypa1|18842  
 Phypa1|5314  
 AT1G79150.1 Phypa1|26892  
 AT1G79140.1  
 AT4G02620.1 Phypa1|38596,Phypa1|38248  
 AT2G32720.1 Phypa1|39023,Phypa1|36744  
 AT5G48810.1,AT5G53560.1  
 AT1G26340.1  
 AT1G67420.1 Phypa1|34019  
 AT4G21090.1,AT4G05450.1 Phypa1|11186  
 AT4G38090.1 Phypa1|3541  
 Phypa1|22827  
 AT3G58140.1 Phypa1|28576  
 AT4G39280.1 Phypa1|39638  
 AT5G06310.1,AT2G05210.1,AT2G04395.1 Phypa1|6800

AT4G14615.1,AT1G52825.1 Phypa1|24259  
 AT1G45233.2,AT5G42920.2 Phypa1|36981  
 AT4G15520.1 Phypa1|229  
 AT4G10140.1,AT1G33490.1 Phypa1|37261,Phypa1|33203  
 AT5G26880.1 Phypa1|24841,Phypa1|26583  
 AT1G43690.1 Phypa1|2534,Phypa1|36421  
 AT1G76200.1 Phypa1|882,Phypa1|31970  
 AT2G45730.1 Phypa1|29171  
 AT2G01120.1 Phypa1|38943  
 AT4G37760.1,AT2G22830.1,AT1G58440.1 Phypa1|39555  
 AT5G24160.1,AT5G24140.1,AT5G24150.1  
 AT5G24155.1  
 Phypa1|27009,Phypa1|26999  
 AT5G41010.1 Phypa1|2481  
 AT1G53690.1  
 AT1G08640.1 Phypa1|644  
 AT1G49380.1 Phypa1|1829  
 AT5G11960.1 Phypa1|27997  
 AT2G34090.2 Phypa1|25115  
 Phypa1|22864  
 AT3G21110.1 Phypa1|24822  
 AT4G13500.1,AT2G05310.1 Phypa1|28543  
 AT1G28100.3 Phypa1|36373  
 AT3G20320.1 Phypa1|29390,Phypa1|28469  
 AT5G51930.1,AT5G51950.1,AT1G12570.1,AT1G72970.1,AT3G56060.1 Phypa1|26968,Phypa1|10455  
 AT1G14190.1,AT1G14185.1  
 AT1G73050.1  
 Phypa1|24460,Phypa1|27161  
 Phypa1|21535  
 AT2G15270.1 Phypa1|34881,Phypa1|33934  
 AT1G21930.1,AT3G42150.1 Phypa1|354  
 Phypa1|1297  
 AT3G45740.1 Phypa1|30529  
 AT3G04460.1 Phypa1|23742  
 AT1G01910.1 Phypa1|34368,Phypa1|38473  
 AT1G71190.1 Phypa1|26903  
 AT5G11870.1  
 AT3G04550.1,AT5G28500.1 Phypa1|1007  
 Phypa1|35483  
 AT4G29960.1 Phypa1|32156  
 Phypa1|19030  
 AT4G10050.1 Phypa1|121  
 AT2G31305.1 Phypa1|16115  
 AT3G48470.1 Phypa1|29516  
 AT1G78010.1 Phypa1|3930  
 AT5G65220.1 Phypa1|1205,Phypa1|1612  
 AT5G62950.1,AT3G28956.1 Phypa1|37223  
 AT2G07771.2,AT2G07681.1,ATMG00900.1 Phypa1|29401  
 AT4G25080.1 Phypa1|30312  
 AT4G11860.1,AT4G22960.1 Phypa1|34531  
 AT5G57280.1 Phypa1|23820  
 AT1G22860.1 Phypa1|36554  
 AT4G36630.2 Phypa1|26279  
 AT3G26580.1 Phypa1|12745,Phypa1|34749  
 AT1G29040.1 Phypa1|30632,Phypa1|26239  
 Phypa1|20906  
 AT3G27890.1 Phypa1|30457  
 AT3G49000.1 Phypa1|28838  
 AT1G03150.1 Phypa1|24060  
 AT3G06960.1,AT2G44640.1 Phypa1|32046  
 AT2G31410.1 Phypa1|23935  
 AT5G51540.1 Phypa1|37057  
 AT1G48850.1 Phypa1|36253  
 AT2G21150.1 Phypa1|28738,Phypa1|27419  
 AT3G11720.1,AT5G06440.3 Phypa1|9609,Phypa1|33976  
 AT5G24350.1 Phypa1|35503  
 AT1G16570.1 Phypa1|2251  
 AT2G39440.1 Phypa1|10814  
 AT5G14250.1 Phypa1|39036  
 AT3G18410.1,AT1G49140.1 Phypa1|39073  
 AT3G07180.1 Phypa1|35317  
 AT4G02530.1 Phypa1|33326  
 AT1G31860.1 Phypa1|29632  
 Phypa1|31316  
 AT1G26640.1 Phypa1|25804,Phypa1|27687  
 AT1G02410.1 Phypa1|28222  
 AT5G18150.1,AT5G58375.1 Phypa1|34186  
 AT1G76460.1,AT1G22910.3,AT1G20880.1,AT1G78260.1,AT1G33470.1 Phypa1|667,Phypa1|829  
 AT3G54770.1,AT2G46780.1  
 AT5G53720.1,AT5G53680.1  
 AT3G06970.1  
 AT1G22330.1



AT2G36740.1 Phypa1|32823  
 AT5G13390.1 Phypa1|25762  
 AT3G53370.1,AT3G09735.1,AT2G37120.1 Phypa1|32468  
 AT5G25080.1 Phypa1|32303  
 AT2G41620.1,AT3G57350.1 Phypa1|31863  
 AT1G52510.1 Phypa1|36237  
 AT3G53270.1 Phypa1|659  
 AT5G59140.1 Phypa1|30637,Phypa1|36734  
 AT1G30540.1 Phypa1|23743  
 AT4G38960.1,AT2G21320.1 Phypa1|34687,Phypa1|36309  
 AT1G78600.1 Phypa1|2964,Phypa1|24264,Phypa1|33658,Phypa1|21968  
 AT4G39070.1,AT1G75540.1  
 AT2G31380.1,AT1G06040.1  
 AT4G10240.1  
 AT2G39910.1 Phypa1|34938  
 AT5G04540.1,AT3G10550.1 Phypa1|461,Phypa1|6847  
 AT3G48540.1 Phypa1|222  
 AT1G22270.1,AT1G78190.1 Phypa1|26471  
 AT1G01760.1 Phypa1|29115  
 AT2G34980.1 Phypa1|29415  
 AT3G12150.1 Phypa1|30342  
 AT5G09830.1 Phypa1|1284  
 AT4G12590.1 Phypa1|37280,Phypa1|28006  
 AT5G54600.1 Phypa1|1585,Phypa1|1583  
 AT4G36120.1,AT1G47900.1,AT1G19835.1 Phypa1|15781,Phypa1|26238,Phypa1|608,Phypa1|29178  
 AT3G05270.1,AT1G77580.2,AT1G21810.1  
 AT2G23360.1  
 Phypa1|610,Phypa1|612,Phypa1|174,Phypa1|37266  
 Phypa1|37018  
 AT5G44650.1 Phypa1|28782  
 AT2G14660.1 Phypa1|793  
 AT4G31130.1 Phypa1|28252  
 AT1G02910.1 Phypa1|33272  
 Phypa1|9802  
 AT3G05760.1 Phypa1|37586  
 Phypa1|8907  
 AT3G60740.1 Phypa1|35196  
 AT5G12320.1 Phypa1|25321  
 AT2G17390.1,AT4G35450.1 Phypa1|24124,Phypa1|175  
 Phypa1|35712  
 Phypa1|33341  
 Phypa1|30154  
 Phypa1|1649  
 Phypa1|24761  
 AT5G56740.1 Phypa1|34671  
 AT5G23290.1 Phypa1|29422  
 AT4G16566.1 Phypa1|26959,Phypa1|28373  
 AT3G58730.1 Phypa1|39513,Phypa1|35125  
 Phypa1|29699  
 AT5G35430.1 Phypa1|30273,Phypa1|39581  
 AT5G58005.1 Phypa1|29281,Phypa1|25687  
 Phypa1|18226  
 AT4G28660.1 Phypa1|3001,Phypa1|2716  
 AT1G77620.1 Phypa1|17032  
 AT1G21640.1 Phypa1|38293  
 AT4G06536.1 Phypa1|17757  
 AT4G06534.1  
 AT4G25940.1,AT2G01600.1,AT5G57200.1,AT1G14910.1 Phypa1|922  
 AT5G35200.1  
 Phypa1|17195  
 Phypa1|32452,Phypa1|33483  
 Phypa1|35488  
 Phypa1|17178  
 AT1G55300.2 Phypa1|25713,Phypa1|715  
 AT5G64180.1 Phypa1|37810  
 AT1G73970.1 Phypa1|32652  
 AT3G15190.1 Phypa1|734,Phypa1|258  
 AT1G31600.1 Phypa1|565  
 AT2G20930.1 Phypa1|24217,Phypa1|39735  
 AT1G53000.1 Phypa1|30654  
 Phypa1|1530  
 AT5G10320.1 Phypa1|30890  
 AT1G18640.1 Phypa1|27737  
 AT4G17650.1 Phypa1|2025,Phypa1|30319  
 AT2G01410.1 Phypa1|33571  
 AT2G06010.1 Phypa1|29593,Phypa1|39430  
 AT3G09310.1 Phypa1|358  
 AT3G63190.1 Phypa1|34469  
 Phypa1|31133  
 AT4G18540.1 Phypa1|1814  
 AT3G20920.1 Phypa1|24232,Phypa1|36095  
 AT3G42340.1,AT1G64410.1,AT4G07800.1,AT3G51690.1,AT5G34540.1,AT3G42320.1,AT3G51700.1,AT5G32070.1,A

T5G37110.1,AT1G52960.1,AT3G30420.1,AT3G43330.1,AT4G03916.1,AT3G43350.1,AT5G28780.1,AT3G13250.1,AT  
3G42100.1,AT1G35940.1,AT3G30560.1,AT3G31980.1,AT4G03690.1  
Phypa1|14,Phypa1|27688,Phypa1|24983,Phypa1|25436  
AT1G54430.1,AT2G05080.1  
Phypa1|29454  
Phypa1|25390  
Phypa1|25791,Phypa1|24892  
Phypa1|24544  
AT4G25540.1 Phypa1|36293  
AT3G24495.1 Phypa1|11193  
AT4G02070.1 Phypa1|28347  
AT3G20475.1  
Phypa1|3749  
AT1G08780.1 Phypa1|35485  
AT2G35736.1 Phypa1|27281,Phypa1|27612  
Phypa1|36429  
AT1G35220.1 Phypa1|32319,Phypa1|32066  
AT4G22930.1 Phypa1|26314  
AT5G52970.1 Phypa1|24608  
AT3G02660.1 Phypa1|2412  
Phypa1|22724  
AT1G14300.1 Phypa1|23983  
AT3G25470.1 Phypa1|25188  
Phypa1|31161  
AT3G07130.1 Phypa1|37425,Phypa1|28131,Phypa1|30548  
AT3G20500.1 Phypa1|28083,Phypa1|36519  
AT2G32770.3  
AT3G52810.1,AT3G52820.1,AT3G52780.1  
Phypa1|37017  
Phypa1|14386,Phypa1|24823  
AT5G25480.1 Phypa1|27973  
AT2G32590.1 Phypa1|28990,Phypa1|36303  
AT3G50685.1 Phypa1|797  
AT2G33450.1 Phypa1|38787,Phypa1|29237  
AT2G26970.1 Phypa1|2587,Phypa1|38933  
AT1G52590.1 Phypa1|26615  
Phypa1|31061  
AT5G41850.1 Phypa1|28481  
Phypa1|11754  
AT1G09870.1 Phypa1|26876,Phypa1|38030  
AT1G75350.1 Phypa1|2196,Phypa1|2369,Phypa1|1656  
AT3G08010.1 Phypa1|1896,Phypa1|27542  
AT5G40250.1,AT2G18650.1,AT5G57750.1,AT1G23980.1,AT4G30400.1 Phypa1|28535,Phypa1|2133  
AT1G72220.1  
AT3G60220.1  
AT5G46650.1  
Phypa1|855  
Phypa1|26865  
AT5G13240.1 Phypa1|32354,Phypa1|34681  
AT3G03070.1 Phypa1|29790,Phypa1|25186  
AT5G08565.1,AT5G63670.1 Phypa1|26940  
AT1G80910.1,AT1G16020.1 Phypa1|34546  
AT3G24200.2 Phypa1|24685  
AT5G55960.1 Phypa1|1376,Phypa1|37958  
Phypa1|448  
AT3G10690.1 Phypa1|30913,Phypa1|27877  
AT1G04620.1 Phypa1|27919  
AT1G02100.1 Phypa1|25000  
AT5G05310.3 Phypa1|2888  
AT3G23430.1,AT3G29060.1,AT1G35350.1,AT1G14040.1,AT4G25350.1,AT1G69480.1,AT2G03260.1,AT2G03240.1,A  
T1G68740.1,AT1G26730.1,AT2G03250.1 Phypa1|34998  
AT1G55325.1 Phypa1|37601,Phypa1|32355  
AT4G32820.1 Phypa1|28462  
AT2G19450.1 Phypa1|37212  
Phypa1|33224  
AT1G79810.1 Phypa1|37929  
AT5G49650.1 Phypa1|39747,Phypa1|28797  
AT4G05440.1 Phypa1|29349  
AT5G49510.1 Phypa1|39357  
AT4G32690.1 Phypa1|38555  
Phypa1|39571  
AT3G24140.1 Phypa1|36769,Phypa1|30985  
AT5G65320.1,AT5G46690.1,AT3G61950.1,AT1G72210.1,AT4G01460.1,AT2G46810.1,AT1G22490.1  
AT5G53210.1  
AT3G06120.1  
AT2G24090.1 Phypa1|30211,Phypa1|1722  
Phypa1|31187  
AT1G64430.1 Phypa1|1379  
AT3G25100.1 Phypa1|23800  
AT2G36230.1 Phypa1|27818  
AT5G03370.1 Phypa1|36125  
Phypa1|29242,Phypa1|27767

AT1G68660.1 Phypa1|1208,Phypa1|1209  
 AT4G09620.1 Phypa1|25137  
 AT5G47830.1 Phypa1|36532,Phypa1|773,Phypa1|772  
 AT2G45640.1 Phypa1|26770  
 AT1G20080.1,AT2G20990.1 Phypa1|2882,Phypa1|38279,Phypa1|24777  
 AT1G05500.1,AT5G11100.1 Phypa1|7024  
 AT2G21040.1,AT2G21010.1  
 AT5G04220.2  
     Phypa1|18652  
     Phypa1|29072  
 AT5G40500.1 Phypa1|26157  
 AT1G67740.1 Phypa1|30782  
     Phypa1|268,Phypa1|27497  
 AT5G04440.1 Phypa1|26067  
 AT1G78995.1 Phypa1|33213  
 AT5G56090.1 Phypa1|29918  
 AT5G58020.1 Phypa1|1096  
 AT2G43640.1 Phypa1|37805  
 AT2G01490.1 Phypa1|37797  
 AT5G19630.1 Phypa1|35658  
 AT3G49990.1 Phypa1|35321  
 AT5G42150.1 Phypa1|1956,Phypa1|25251  
 AT3G18165.1 Phypa1|33383  
 AT5G52810.1 Phypa1|21364  
     Phypa1|169  
     Phypa1|30503  
 AT1G48160.1 Phypa1|29954  
 AT1G28140.1 Phypa1|1984  
 AT1G50170.1 Phypa1|26882  
     Phypa1|30482  
 AT3G21520.1,AT3G21550.1,AT4G18425.1,AT3G02430.1,AT5G46090.1,AT4G24310.1,AT5G39650.1,AT1G09157.1,A  
 T5G27370.1 Phypa1|24596  
 AT2G26740.1,AT4G15960.1,AT4G02340.1,AT3G05600.1,AT2G26750.1 Phypa1|36016  
 AT4G15955.1  
 AT3G51000.1  
     Phypa1|28507  
     Phypa1|26453  
     Phypa1|3786  
     Phypa1|11240  
 AT4G34890.1,AT4G34900.1 Phypa1|32723  
 AT1G04580.1,AT5G20960.1,AT2G27150.1,AT3G43600.1 Phypa1|28597,Phypa1|23886  
 AT4G37500.1  
 AT3G04390.1  
     Phypa1|35465  
     Phypa1|23191  
     Phypa1|19402  
 AT5G59400.2 Phypa1|34133,Phypa1|2027  
 AT1G31350.1 Phypa1|36467,Phypa1|31000,Phypa1|26563,Phypa1|1013  
 AT1G05460.1 Phypa1|36943  
 AT5G46290.1 Phypa1|39319,Phypa1|26440,Phypa1|26318  
 AT2G04540.1 Phypa1|27616  
 AT1G74960.1 Phypa1|14690,Phypa1|27638,Phypa1|36654,Phypa1|38948  
     Phypa1|31082  
     Phypa1|3103  
 AT1G54150.1 Phypa1|25088,Phypa1|24154  
 AT4G31200.1 Phypa1|1784  
 AT5G51300.1 Phypa1|37279,Phypa1|36901  
     Phypa1|4290  
 AT1G78895.1,AT1G16830.1 Phypa1|25141,Phypa1|2195  
 AT2G15820.1 Phypa1|24568,Phypa1|1769  
 AT4G17910.1 Phypa1|38911  
 AT4G25290.1 Phypa1|1773,Phypa1|29975  
 AT2G14520.1,AT4G33700.1 Phypa1|28864,Phypa1|3058,Phypa1|25103  
 AT1G03270.1,AT4G14230.1,AT4G14240.1 Phypa1|38019,Phypa1|11045  
 AT1G47330.1  
 AT5G52790.1  
     Phypa1|25207,Phypa1|1819  
     Phypa1|16032  
     Phypa1|4151  
     Phypa1|16031  
 AT5G52590.1 Phypa1|38037  
 AT5G56730.1 Phypa1|28644  
     Phypa1|17078  
 AT3G54670.1 Phypa1|27310  
 AT1G24170.1,AT4G02130.1,AT1G02720.1,AT1G13250.1,AT3G28340.1,AT3G62660.1,AT1G70090.1  
     Phypa1|3891,Phypa1|17188,Phypa1|39062  
 AT1G19300.1,AT3G06260.1,AT3G50760.1  
     Phypa1|39515,Phypa1|26085  
 AT4G39680.1 Phypa1|35138  
 AT3G24080.1 Phypa1|33496  
 AT4G35680.1,AT4G01590.1 Phypa1|32611  
 AT5G18480.1 Phypa1|25891,Phypa1|30640

AT2G01260.1,AT1G15030.1,AT5G49220.1 Phypa1|36224,Phypa1|7142,Phypa1|29709,Phypa1|25293  
 AT1G73210.1,AT1G17830.1,AT4G28150.1,AT4G03420.1,AT1G03610.1  
 AT5G23380.1,AT5G08360.1  
 AT4G16100.1  
 AT4G03180.1 Phypa1|32141  
 AT1G20110.1 Phypa1|25841  
 AT1G27750.1 Phypa1|13628  
 AT5G38840.1 Phypa1|32523  
 AT3G18860.1 Phypa1|32527  
 AT4G34460.1 Phypa1|24706  
 Phypa1|23748  
 AT3G18140.1 Phypa1|34022  
 AT2G22040.1  
 AT1G19490.1 Phypa1|12069,Phypa1|34146  
 AT5G42960.1,AT1G45170.1 Phypa1|37217,Phypa1|36718  
 AT1G45231.2 Phypa1|27320  
 AT1G30550.1  
 AT2G05830.1 Phypa1|1440  
 AT4G17380.1 Phypa1|29206  
 AT3G24320.1 Phypa1|29156  
 Phypa1|1847  
 AT1G76390.1,AT1G20780.1 Phypa1|36933,Phypa1|24477,Phypa1|27908,Phypa1|24474  
 AT1G68940.1  
 Phypa1|14762,Phypa1|17696,Phypa1|14645,Phypa1|909,Phypa1|3743,Phypa1|25751  
 AT5G57370.1 Phypa1|33525  
 AT2G28910.1 Phypa1|36670  
 AT1G13190.1,AT5G55670.1 Phypa1|28143,Phypa1|26049  
 AT3G59800.1 Phypa1|28239,Phypa1|35355  
 AT2G43795.1  
 AT2G44200.1 Phypa1|854  
 AT2G44195.1  
 AT3G14740.2 Phypa1|163  
 AT2G15860.1 Phypa1|30862  
 AT2G32950.1 Phypa1|28368,Phypa1|36858,Phypa1|34000,Phypa1|39477,Phypa1|24884,Phypa1|36896  
 AT5G23730.1,AT5G52250.1 Phypa1|1047,Phypa1|37997  
 AT3G15354.1,AT1G53090.1 Phypa1|26510,Phypa1|36290  
 AT2G46340.1,AT4G11110.1  
 Phypa1|34432,Phypa1|38369,Phypa1|25887  
 AT5G44200.1 Phypa1|27576  
 AT4G11640.1 Phypa1|28692  
 AT3G54460.1 Phypa1|25090  
 AT2G40770.1 Phypa1|24494  
 AT4G01940.1 Phypa1|693  
 AT5G60710.1,AT3G54780.1,AT5G65683.1,AT1G08050.1,AT2G38970.1,AT5G49665.1,AT2G22680.1,AT4G37890.1  
 Phypa1|22699  
 AT1G09800.1 Phypa1|27167  
 AT4G16970.1 Phypa1|5253  
 AT1G44780.1,AT4G08310.1 Phypa1|34298  
 AT3G62080.1 Phypa1|26430  
 AT5G63910.1 Phypa1|26900  
 AT5G55380.1,AT5G55360.1,AT5G55330.1,AT5G55370.1,AT5G55340.1,AT3G51970.1,AT1G34500.1,AT5G55320.1,AT5G51420.1,AT5G55350.1,AT1G34490.1 Phypa1|26904  
 AT1G34520.1  
 Phypa1|32387  
 AT1G29990.1 Phypa1|37408  
 AT4G33360.1 Phypa1|37587  
 AT1G56090.1 Phypa1|37566,Phypa1|26790,Phypa1|29731  
 AT4G21220.1,AT4G05210.1 Phypa1|33785  
 AT1G18190.1 Phypa1|4154  
 AT4G00110.1,AT4G30440.1,AT1G02000.1  
 Phypa1|32904,Phypa1|2499,Phypa1|2627,Phypa1|2530,Phypa1|36390,Phypa1|33807,Phypa1|23885,Phypa1|24009  
 AT3G23820.1,AT2G45310.1,AT4G12250.1  
 Phypa1|30606  
 Phypa1|2988  
 AT2G44580.1 Phypa1|5813  
 AT1G15200.1 Phypa1|29941,Phypa1|36369  
 AT5G27450.1 Phypa1|39449  
 AT5G54830.1 Phypa1|27977  
 AT4G29910.1 Phypa1|36987  
 AT5G55640.1 Phypa1|26953,Phypa1|38353  
 AT2G26270.1,AT3G43930.1 Phypa1|8093,Phypa1|24997  
 AT3G30390.1,AT5G38820.1 Phypa1|24471,Phypa1|37893  
 AT1G80510.1 Phypa1|32890  
 AT2G40420.1,AT3G56200.1  
 Phypa1|18427  
 Phypa1|34500  
 AT5G48240.1 Phypa1|35016  
 AT3G16810.1 Phypa1|29538  
 AT3G57790.1 Phypa1|495,Phypa1|38058  
 AT5G23080.1 Phypa1|35340  
 AT4G35990.1 Phypa1|24558

AT4G31400.1 Phypa1|1968  
 AT2G37110.1 Phypa1|25485,Phypa1|32100,Phypa1|37899  
 AT5G67100.1 Phypa1|2968  
 Phypa1|17978  
 AT3G47930.1 Phypa1|25738  
 AT4G24130.1 Phypa1|2190,Phypa1|29940,Phypa1|26306  
 AT5G49600.1,AT1G09310.1,AT1G56580.1,AT5G46230.1  
 AT1G30020.1  
 AT5G66470.1 Phypa1|30521  
 AT1G71500.1 Phypa1|2010  
 AT4G00030.1 Phypa1|30564  
 AT1G66590.2,AT1G69750.1 Phypa1|30563  
 AT3G18100.1 Phypa1|459  
 AT4G00170.1,AT3G60600.1,AT2G45140.1 Phypa1|4408,Phypa1|36460,Phypa1|29642  
 AT5G47180.1  
 AT1G51270.1  
 AT1G08820.1  
 AT2G23830.1  
 AT5G61330.1 Phypa1|15744  
 AT4G24270.2 Phypa1|27914  
 AT5G65950.1 Phypa1|33264  
 AT3G49600.1 Phypa1|25082  
 AT5G35100.1 Phypa1|30512  
 AT4G11010.1,AT4G23900.1 Phypa1|2540,Phypa1|2976  
 AT1G17410.1 Phypa1|24649  
 AT5G63310.1 Phypa1|26439,Phypa1|24619  
 AT4G09320.1 Phypa1|37418,Phypa1|28522,Phypa1|34280  
 Phypa1|16832  
 Phypa1|10134  
 AT1G74070.1 Phypa1|35958  
 AT5G48340.1 Phypa1|13908  
 AT5G38360.1 Phypa1|228  
 AT2G24990.1,AT5G37350.1 Phypa1|28815  
 AT3G51270.1 Phypa1|36411  
 AT3G44680.1 Phypa1|34425  
 AT4G38130.1 Phypa1|38003,Phypa1|29158  
 AT3G44660.1,AT3G44490.1  
 AT5G63110.1  
 AT5G35600.1  
 Phypa1|31292  
 AT3G55080.1 Phypa1|30339,Phypa1|34373  
 AT5G17240.1 Phypa1|36643  
 AT1G07700.3 Phypa1|723,Phypa1|242  
 AT3G56230.1 Phypa1|3012,Phypa1|25347  
 Phypa1|8182  
 AT4G13590.1 Phypa1|28036  
 AT5G36290.1 Phypa1|1996,Phypa1|28750  
 AT1G64150.1 Phypa1|152,Phypa1|25315  
 AT1G25520.1,AT1G68650.1 Phypa1|27995  
 AT2G30600.1 Phypa1|2243  
 AT3G57060.1 Phypa1|30228,Phypa1|28885  
 AT3G56330.1 Phypa1|24899  
 AT3G15620.1 Phypa1|24906  
 AT1G49540.1 Phypa1|30532  
 AT4G13050.1,AT3G25110.1 Phypa1|27981,Phypa1|24545  
 AT1G08510.1 Phypa1|37486,Phypa1|37151,Phypa1|114,Phypa1|1009,Phypa1|1904  
 Phypa1|25818,Phypa1|25450  
 Phypa1|4208  
 Phypa1|1091,Phypa1|542  
 Phypa1|27212  
 Phypa1|14475  
 AT5G02770.1 Phypa1|33915  
 AT5G37590.1 Phypa1|24572  
 AT3G45830.1 Phypa1|9787,Phypa1|33268  
 AT3G28030.1 Phypa1|6606  
 AT4G24880.1 Phypa1|26582  
 AT2G42770.1 Phypa1|27348  
 AT5G41480.1 Phypa1|467  
 AT4G21800.1 Phypa1|38995  
 AT4G31160.1 Phypa1|39021  
 Phypa1|15761  
 AT1G01930.1 Phypa1|33635  
 AT2G02710.1 Phypa1|28912  
 Phypa1|135  
 AT2G20330.1 Phypa1|38005  
 AT4G01860.1 Phypa1|32795  
 AT5G49210.1 Phypa1|33223  
 AT5G44450.1 Phypa1|36042  
 AT3G06510.1 Phypa1|25439,Phypa1|25883  
 ATMG00520.1 Phypa1|8346  
 Phypa1|33992,Phypa1|35587  
 AT3G27340.1 Phypa1|26569

AT5G01010.1 Phypa1|36818  
AT5G14240.1 Phypa1|39210  
AT4G27540.1 Phypa1|6500  
AT3G04260.1 Phypa1|38507  
AT5G02250.1 Phypa1|25740  
AT4G25000.1 Phypa1|24942,Phypa1|28288,Phypa1|2938  
AT1G69830.1 Phypa1|19813,Phypa1|27473  
AT1G76130.1 Phypa1|30990,Phypa1|24741  
AT3G12760.1 Phypa1|20251  
AT5G23590.1 Phypa1|1097  
AT4G16510.1 Phypa1|25204  
AT1G03110.1 Phypa1|26886  
AT2G14045.1 Phypa1|29179  
Phypa1|826  
AT4G21000.1,AT1G08065.1,AT5G56330.1,AT4G20990.1,AT3G52720.1,AT2G28210.1,AT5G04180.1,AT1G08080.1  
Phypa1|201  
Phypa1|18726  
Phypa1|22447,Phypa1|22331  
Phypa1|34467  
AT5G59960.1 Phypa1|37015,Phypa1|29140  
AT1G17680.1 Phypa1|35999  
AT3G62940.2 Phypa1|38823  
AT3G05520.1 Phypa1|2590,Phypa1|37736  
AT5G17370.1 Phypa1|33841  
Phypa1|33840  
AT4G30990.1 Phypa1|29929  
AT1G79890.1 Phypa1|39650  
AT1G49590.1 Phypa1|29597  
AT5G09860.1 Phypa1|35979  
AT2G17705.1 Phypa1|5642,Phypa1|32294,Phypa1|33753  
AT2G25910.2 Phypa1|19331,Phypa1|25560  
AT1G54440.1,AT5G35910.1 Phypa1|30653  
AT1G48650.1,AT2G01130.1 Phypa1|37903  
AT1G58060.1,AT1G58050.1 Phypa1|30258  
AT2G30800.1 Phypa1|36664  
AT5G04895.1  
AT2G35920.1  
AT1G06670.1  
AT1G05410.1 Phypa1|57  
Phypa1|35010  
AT2G46225.1 Phypa1|30281  
AT3G58460.1 Phypa1|36666  
AT2G29680.1,AT1G07270.1 Phypa1|25598  
AT5G06550.1 Phypa1|28395  
AT1G69240.1,AT3G29770.1,AT1G26360.1 Phypa1|32487,Phypa1|37087  
AT4G16690.1,AT3G10870.1,AT5G58310.1 Phypa1|38687,Phypa1|38732,Phypa1|37879  
AT4G09900.1,AT1G33990.1  
Phypa1|29998  
Phypa1|29574,Phypa1|28384,Phypa1|26420  
Phypa1|28686  
Phypa1|38082  
AT1G11240.1 Phypa1|31718  
AT2G47210.1 Phypa1|25524,Phypa1|2515  
AT5G58760.1 Phypa1|37101  
Phypa1|6612  
AT5G47090.1 Phypa1|29355  
AT4G27120.1 Phypa1|32626  
AT1G01970.1 Phypa1|126  
AT1G76280.1 Phypa1|32599  
AT1G18900.1,AT1G74750.1 Phypa1|27201  
AT4G34830.1  
Phypa1|3445,Phypa1|35095,Phypa1|37610,Phypa1|34058,Phypa1|38791,Phypa1|3615,Phypa1|39268,Phypa1|37311,Phypa1|8513,Phypa1|37745,Phypa1|32573,Phypa1|38434,Phypa1|27742,Phypa1|36202,Phypa1|37780,Phypa1|34991,Phypa1|36986,Phypa1|37667,Phypa1|33308,Phypa1|9676,Phypa1|38029  
AT4G11690.1,AT5G48730.1,AT3G13150.1,AT1G11710.1,AT1G63330.1,AT3G53700.1,AT1G02420.1,AT1G64580.1,AT1G63070.1,AT1G62680.1,AT1G74900.1,AT3G53170.1,AT1G12620.1,AT5G27270.1,AT4G20090.1,AT5G39980.1,AT1G12775.1,AT5G21222.1,AT5G59900.1,AT2G35130.1,AT1G10910.1,AT5G65820.1,AT5G11310.1,AT2G06000.1,AT1G13630.1,AT5G61990.1,AT5G46680.1,AT1G80550.1,AT5G39710.1,AT3G22670.1,AT2G18520.1,AT1G62720.1,AT1G63230.1,AT1G20300.1,AT5G61400.1,AT1G07740.1,AT2G41720.1,AT1G09900.1,AT2G15630.1,AT2G17670.1,AT5G13770.1,AT1G02060.1,AT3G16010.1,AT3G61360.1,AT2G01740.1,AT4G26800.1,AT3G59040.2,AT1G62670.1,AT3G61520.1,AT1G13040.1,AT5G14770.1,AT2G30780.1,AT5G06400.1,AT3G07290.1,AT5G18475.1,AT2G36240.1,AT3G23020.1,AT1G09820.1,AT1G08610.1,AT5G42310.1,AT3G48810.1,AT4G30825.1,AT1G62590.1,AT5G01110.1,AT1G06710.1,AT1G63130.1,AT3G54980.1,AT3G04760.1,AT3G22470.1,AT5G46100.1,AT5G25630.1,AT1G12700.1,AT3G16890.1,AT2G31400.1,AT1G52620.1,AT1G79540.1,AT2G38420.1,AT1G74580.1,AT2G18940.1,AT2G17140.1,AT1G52640.1,AT1G73710.1,AT1G55630.1,AT5G18390.1,AT1G62930.1,AT3G09060.1,AT5G16640.1,AT3G13160.1  
Phypa1|26106,Phypa1|28744  
AT1G74850.1 Phypa1|36028  
AT5G28460.1,AT5G61370.1,AT1G03560.1,AT5G43820.1,AT1G10270.1,AT1G05670.1,AT5G28370.1,AT1G31840.1,AT1G53330.1,AT1G80150.1,AT1G11900.1,AT5G47360.1,AT3G04130.1,AT1G62910.1,AT2G37230.1,AT4G16390.1,AT4G39620.1,AT1G55890.1,AT4G20740.1,AT5G24830.1,AT3G18020.1,AT4G19440.1,AT5G02860.1,AT1G61870.1,AT2G48000.1,AT5G38730.1,AT2G16880.1,AT2G39230.1,AT1G63150.1,AT1G64100.1,AT1G51965.1,AT4G31850.1,AT3G49240.1,AT3G09650.1,AT5G55840.1,AT3G15200.1,AT4G36680.1,AT5G50280.1,AT2G28050.1,AT5G41170.1,AT1G06

580.1,AT3G14580.1,AT3G46610.1,AT1G13800.1,AT3G06920.1,AT1G30290.1,AT2G19280.1,AT1G73400.1,AT5G140  
80.1,AT5G04810.1,AT1G63400.1,AT5G16420.1,AT3G16710.1,AT5G40400.1,AT3G06430.1,AT4G28010.1,AT2G2780  
0.1,AT4G26680.1,AT5G64320.1,AT1G80880.1,AT3G18110.1  
Phypa1|24226,Phypa1|37912,Phypa1|39327,Phypa1|24669,Phypa1|33554,Phypa1|36103,Phypa1|31819,  
Phypa1|39058,Phypa1|25655,Phypa1|24709,Phypa1|30299,Phypa1|31985,Phypa1|462,Phypa1|53,Phypa1|26857,Ph  
ypa1|37115,Phypa1|28273,Phypa1|31514,Phypa1|29130,Phypa1|28,Phypa1|36549,Phypa1|36597,Phypa1|30827,Phy  
pa1|7071,Phypa1|29117,Phypa1|38745,Phypa1|37527,Phypa1|39172,Phypa1|1810,Phypa1|37994  
AT2G01360.1,AT2G01390.1 Phypa1|30333  
AT2G17033.2 Phypa1|35775  
AT1G19525.1  
AT1G79490.1  
AT1G77405.1  
AT3G62470.1,AT3G62540.1,AT5G14820.1  
AT1G71210.1  
AT3G25210.1,AT5G65560.1,AT3G17370.1,AT5G46580.1  
AT1G06270.1,AT1G79080.1,AT1G11630.1,AT1G19290.1,AT5G62370.1,AT2G26790.1,AT1G77360.1  
AT2G40240.1,AT5G15280.1,AT3G56030.1  
AT4G34820.1  
AT3G42560.1  
AT5G15010.1  
AT2G15980.1,AT1G05600.1,AT1G12300.1,AT1G63080.1,AT5G18950.1,AT1G63630.1,AT1G09680.1,AT1G66345.1,A  
T2G32630.1,AT5G12100.1,AT1G71060.1,AT1G77340.1  
AT5G60960.1,AT1G26500.1  
AT1G22960.1,AT2G17525.1,AT1G62860.1  
AT4G14190.1  
AT4G01570.1  
AT1G63320.1  
AT4G38150.1,AT3G60050.1  
AT3G29290.1  
AT4G21170.1  
Phypa1|1128,Phypa1|26346  
Phypa1|29687  
Phypa1|25476,Phypa1|1625,Phypa1|1634,Phypa1|518  
Phypa1|36817  
Phypa1|27971  
Phypa1|4011  
AT3G05910.1,AT4G19410.1,AT3G62060.1,AT5G26670.1,AT1G57590.1,AT5G45280.2,AT2G46930.1,AT1G09550.1,A  
T5G23870.3,AT3G09410.1,AT4G19420.1 Phypa1|28119  
AT2G34640.1 Phypa1|13881,Phypa1|20311  
AT1G60640.1 Phypa1|10522  
AT1G77470.1 Phypa1|28058  
AT1G63160.1 Phypa1|24539  
AT3G50850.1,AT5G49560.1 Phypa1|690  
AT5G58990.1,AT5G52370.1 Phypa1|32152  
AT5G02430.1,AT5G54200.1,AT2G37670.1,AT3G15470.1 Phypa1|8060,Phypa1|39532,Phypa1|29123  
AT5G24320.2,AT5G53500.1,AT5G42010.1,AT1G64610.1  
AT1G48870.1  
Phypa1|8061,Phypa1|14069  
Phypa1|24074,Phypa1|28261  
AT1G01770.1 Phypa1|27277  
AT1G05385.1 Phypa1|2094  
AT5G53770.1 Phypa1|33695  
AT5G11240.1 Phypa1|37208  
AT2G04560.1 Phypa1|26273,Phypa1|1854  
AT5G11010.3 Phypa1|29572  
AT2G13840.1 Phypa1|1875  
Phypa1|21751,Phypa1|30685  
AT5G48870.1 Phypa1|38395  
AT5G65940.1,AT2G30660.1,AT2G30650.1 Phypa1|38044,Phypa1|27091,Phypa1|38237  
AT3G24360.1,AT4G13360.1 Phypa1|33299,Phypa1|35973  
AT1G06550.1 Phypa1|37153  
AT4G31810.1,AT3G60510.1  
ATCG00750.1 Phypa1|390  
AT1G12470.1 Phypa1|30514  
AT5G17930.1 Phypa1|36498  
Phypa1|32810  
AT2G04940.1 Phypa1|29923  
Phypa1|25370  
AT5G66530.1 Phypa1|38341,Phypa1|30789  
AT5G57330.1 Phypa1|23735,Phypa1|24241  
AT3G61610.1,AT4G23730.1  
AT5G14500.1,AT3G01590.1  
AT4G25900.1  
AT4G17620.1 Phypa1|36528  
AT5G26610.1 Phypa1|24800  
AT5G19485.1 Phypa1|2863  
AT4G04670.1 Phypa1|29841  
AT5G55110.1,AT4G26880.1,AT1G50720.1 Phypa1|26659  
AT1G53130.1  
AT1G50650.1  
Phypa1|28283  
Phypa1|37511,Phypa1|25412

AT4G34490.1 Phypa1|34235  
 AT2G33740.2 Phypa1|30561  
 AT5G58070.1 Phypa1|39751  
 AT3G12530.1 Phypa1|38922  
 AT2G28450.1 Phypa1|28259  
 AT4G31370.1,AT3G12660.1,AT4G12730.1,AT5G55730.1,AT2G24450.1,AT2G45470.1  
 Phypa1|14716,Phypa1|2039,Phypa1|24982  
 AT3G60900.1,AT3G46550.1  
 AT5G22340.2 Phypa1|34951  
 AT4G34280.1 Phypa1|25169  
 Phypa1|33673  
 AT1G52980.1 Phypa1|1397  
 AT1G06060.1 Phypa1|38358,Phypa1|28973  
 AT3G55070.1 Phypa1|29738,Phypa1|23897  
 AT3G22660.1 Phypa1|36555  
 AT1G44835.2 Phypa1|6788  
 AT1G64880.1 Phypa1|33808  
 AT5G63905.1 Phypa1|32057,Phypa1|33944  
 AT1G18100.1 Phypa1|27669,Phypa1|2955,Phypa1|25725,Phypa1|26717  
 AT4G20370.1,AT2G27550.1,AT5G62040.1,AT5G03840.1,AT1G65480.1  
 AT1G24340.1 Phypa1|22  
 Phypa1|30952  
 AT2G35500.1 Phypa1|32786  
 AT5G40080.1,AT5G39800.1 Phypa1|39483  
 AT4G02980.1 Phypa1|30178  
 AT1G52530.1 Phypa1|23825  
 AT2G06005.1,AT5G20580.1 Phypa1|30979  
 Phypa1|31656  
 AT1G48760.1 Phypa1|29240  
 AT2G17250.1 Phypa1|32275  
 Phypa1|8102  
 AT3G55005.1,AT3G55000.1 Phypa1|34136  
 AT2G22650.1 Phypa1|25501  
 AT4G29130.1,AT2G19860.1 Phypa1|24922,Phypa1|39703,Phypa1|39688,Phypa1|24519  
 AT1G47840.1  
 AT3G20040.1,AT1G50460.1  
 AT4G37840.1  
 Phypa1|23946,Phypa1|2727,Phypa1|2663  
 Phypa1|38560,Phypa1|39034  
 Phypa1|29013,Phypa1|29498  
 AT1G29320.1 Phypa1|32551  
 AT1G19860.1 Phypa1|31860  
 AT5G11450.1 Phypa1|26384  
 AT5G51430.1 Phypa1|37209  
 AT5G27970.1 Phypa1|28287  
 AT2G47290.1 Phypa1|4172  
 AT1G26840.1 Phypa1|27621  
 AT3G16760.1 Phypa1|35528,Phypa1|18653  
 AT4G32360.1 Phypa1|39558  
 AT1G64600.1 Phypa1|37666  
 AT2G12550.1 Phypa1|29933  
 AT4G09960.1,AT4G18960.1,AT2G42830.2,AT3G58780.1  
 Phypa1|18252,Phypa1|26417,Phypa1|24140,Phypa1|29001,Phypa1|28600,Phypa1|12815  
 AT1G01530.1,AT3G04100.1,AT4G36590.1,AT2G34440.1,AT1G72350.1,AT1G17310.1,AT1G65360.1,AT2G24840.1,A  
 T3G66656.1,AT5G60440.1 Phypa1|1733,Phypa1|2225  
 AT1G69120.1,AT1G26310.1,AT2G03710.1,AT5G60910.1,AT5G15800.1,AT3G30260.1,AT1G24260.2,AT3G02310.1,A  
 T2G45650.1  
 AT5G65060.1,AT5G65070.1,AT5G65080.1,AT5G10140.1,AT2G14210.1,AT2G45660.1,AT1G77080.4,AT5G65050.1  
 AT2G22540.1,AT4G24540.1  
 AT5G23260.2,AT4G37940.1,AT5G62165.1,AT5G13790.1  
 AT2G22630.1,AT3G57230.1  
 AT1G31140.1,AT3G57390.1,AT4G11880.1  
 AT1G71692.1  
 AT5G51870.1,AT5G51860.1,AT4G22950.1  
 AT1G47760.1  
 AT3G61120.1  
 AT5G20240.1  
 AT3G54340.1  
 AT2G19270.1 Phypa1|18799  
 AT5G66130.1 Phypa1|28745  
 AT2G46560.1 Phypa1|27702  
 AT2G41350.2 Phypa1|29419  
 AT2G21980.1  
 AT1G72320.1 Phypa1|35260  
 AT5G13470.1 Phypa1|34694  
 AT4G25090.1,AT1G19230.1,AT5G07390.1,AT5G47910.1,AT1G09090.2,AT5G51060.1,AT4G11230.1,AT1G64060.1  
 Phypa1|29346,Phypa1|38436,Phypa1|4373,Phypa1|38303  
 AT3G45810.1,AT5G60010.1  
 AT2G40550.1 Phypa1|35498  
 AT3G63140.1 Phypa1|23816  
 AT5G36120.1 Phypa1|33238  
 AT5G39340.1,AT3G29350.1,AT1G03430.1,AT3G21510.1 Phypa1|27565,Phypa1|27567,Phypa1|25601



AT1G80100.1  
 AT4G04402.1  
 AT3G16360.1  
     Phypa1|29792  
 AT5G50375.1    Phypa1|38475  
 AT3G61620.1    Phypa1|24247  
 AT2G46910.1    Phypa1|38221  
     Phypa1|27140  
 AT3G54170.1    Phypa1|34416  
     Phypa1|33138  
 AT1G16900.1    Phypa1|35838  
 AT4G17020.2    Phypa1|24331  
 AT5G23240.1    Phypa1|26363  
     Phypa1|28888  
 AT1G15690.1    Phypa1|39731  
 AT1G78920.1,AT1G16780.1    Phypa1|27577,Phypa1|36257  
     Phypa1|37996  
     Phypa1|35790  
     Phypa1|39624  
 AT5G49945.1,AT4G24330.1    Phypa1|26024  
 AT5G46420.1    Phypa1|27556  
 AT5G20165.1    Phypa1|39718  
 AT5G51700.1    Phypa1|24263,Phypa1|15382  
 AT3G43520.1    Phypa1|25117,Phypa1|28126  
 AT2G26240.1  
 AT4G30720.1    Phypa1|39666  
 AT5G04360.1    Phypa1|34055  
 AT1G48270.1    Phypa1|30626,Phypa1|36831  
 AT5G02850.1    Phypa1|32516  
 AT3G03100.1    Phypa1|25060  
 AT5G49530.1    Phypa1|32316  
 AT5G11620.1    Phypa1|32602  
 AT1G56590.1    Phypa1|37203  
 AT3G56040.1    Phypa1|36764  
 AT1G69680.1    Phypa1|37043,Phypa1|29843  
 AT3G07650.1,AT5G48250.1,AT4G15250.1    Phypa1|25825,Phypa1|25477  
 AT1G28050.1,AT1G68190.1,AT2G33500.1  
 AT3G21880.1  
 AT1G60250.1,AT2G47890.1  
 AT1G05290.1  
     Phypa1|29302  
     Phypa1|1459,Phypa1|1461  
 AT1G24290.1    Phypa1|30781,Phypa1|38281  
     Phypa1|31487  
 AT3G17611.1    Phypa1|38355,Phypa1|38825  
 AT5G17620.1    Phypa1|16822  
 AT1G32200.1    Phypa1|39096  
 AT1G33810.1    Phypa1|31513  
 AT1G50120.1    Phypa1|24809  
     Phypa1|2015  
 AT1G64980.1    Phypa1|661  
 AT1G70360.1,AT1G23780.1,AT1G23770.1    Phypa1|34724  
 AT1G19690.1    Phypa1|28684  
 AT1G08100.1,AT1G08090.1,AT5G60780.1,AT3G45060.1,AT5G60770.1  
     Phypa1|24935,Phypa1|11806,Phypa1|26916,Phypa1|36041,Phypa1|29451,Phypa1|30713,Phypa1|37012,  
     Phypa1|27588  
 AT1G12940.1  
 AT5G14570.1  
 AT2G39090.1    Phypa1|24849  
 AT5G18070.1    Phypa1|39346  
 AT3G51510.1    Phypa1|750  
 AT4G31530.1    Phypa1|1044  
 AT1G72640.1    Phypa1|25959  
 AT4G18270.1    Phypa1|30936,Phypa1|22829,Phypa1|25005  
 AT5G63830.1    Phypa1|27051  
 AT4G00585.1    Phypa1|36801  
 AT3G55830.1    Phypa1|38853  
 AT1G62250.1    Phypa1|27847  
 AT5G19840.1    Phypa1|24676  
 AT2G13540.1    Phypa1|23710,Phypa1|38528  
 AT1G50710.1    Phypa1|38936  
 AT1G76730.1    Phypa1|1050  
 AT3G55820.1    Phypa1|16383  
 AT5G27390.1    Phypa1|35149  
 AT2G33440.1    Phypa1|27928  
 AT4G36690.1,AT1G60900.1    Phypa1|27011,Phypa1|1380,Phypa1|37819,Phypa1|26480  
 AT1G60830.1  
 AT2G33435.1  
     Phypa1|27426  
 AT4G13040.1    Phypa1|33598,Phypa1|29972  
     Phypa1|25861  
 AT4G28590.1    Phypa1|35516

AT2G31840.1  
 AT2G27450.2 Phypa1|38305  
 AT5G64370.1 Phypa1|38894  
 AT3G21200.1 Phypa1|30124,Phypa1|28987  
 AT4G00800.1 Phypa1|15996,Phypa1|3471  
 AT4G00790.1  
 AT5G53860.2 Phypa1|30246  
 AT5G52450.1,AT1G73700.1,AT2G34360.1 Phypa1|38388,Phypa1|2631,Phypa1|36730,Phypa1|24210  
 AT1G71870.1 Phypa1|36346,Phypa1|39025,Phypa1|491,Phypa1|2934  
 AT1G15160.1,AT2G04040.1,AT1G15150.1,AT2G04050.1,AT2G04070.1,AT1G15170.1,AT1G15180.1,AT2G04080.1,AT1G71140.1  
 AT1G47530.1,AT1G33090.1,AT1G33110.1,AT3G21690.1,AT1G33100.1,AT4G25640.1,AT3G59030.1,AT5G10420.1,AT4G21900.1,AT4G21910.2,AT1G33080.1,AT1G23300.1,AT1G11670.1,AT4G00350.1,AT1G12950.1,AT3G26590.1,AT5G38030.1,AT5G65380.1,AT5G44050.1,AT1G61890.1  
 AT1G66780.1,AT2G04100.1,AT2G04090.1,AT1G64820.1,AT1G66760.2  
 AT2G04066.1  
 AT4G29140.1,AT1G58340.1,AT4G23030.1,AT5G19700.1  
 AT2G38510.1  
 AT4G22790.1  
 AT5G49130.1  
 AT5G52050.1  
 Phypa1|14071,Phypa1|24985  
 Phypa1|1868  
 Phypa1|28722,Phypa1|26773  
 AT2G26430.1 Phypa1|110,Phypa1|28034  
 AT4G19600.1,AT5G45190.1 Phypa1|666,Phypa1|1843  
 AT4G19560.1  
 AT1G27630.1  
 AT1G35440.1  
 Phypa1|27833,Phypa1|27035  
 Phypa1|27829  
 AT5G22830.1 Phypa1|29816,Phypa1|30507  
 AT2G21870.1 Phypa1|23739  
 AT3G25980.1 Phypa1|37663  
 AT5G03080.1 Phypa1|29508,Phypa1|23712  
 AT5G04620.2 Phypa1|37133  
 AT1G21350.3 Phypa1|29021,Phypa1|38522  
 AT3G62830.1,AT2G47650.1 Phypa1|39340,Phypa1|37141  
 AT3G46440.1,AT2G28760.1,AT5G59290.1 Phypa1|37525  
 AT3G53520.2  
 AT2G28755.1  
 Phypa1|33873  
 Phypa1|36651  
 AT5G14050.1 Phypa1|28440  
 AT4G02440.1 Phypa1|593,Phypa1|29640  
 Phypa1|12796  
 AT4G38370.1 Phypa1|27535  
 AT2G36370.1 Phypa1|34088  
 AT5G27920.1,AT5G23340.1,AT3G58530.1,AT5G40470.1,AT1G80630.1,AT5G01720.1  
 Phypa1|27067,Phypa1|29533,Phypa1|35181,Phypa1|38644,Phypa1|36983  
 Phypa1|20239  
 AT4G21320.1 Phypa1|35018,Phypa1|32428  
 AT1G23230.1 Phypa1|26398  
 AT3G59380.1 Phypa1|37731  
 AT3G11950.1 Phypa1|36711  
 AT4G36440.1 Phypa1|33485,Phypa1|33392  
 AT5G21140.1 Phypa1|28818  
 AT2G31865.2,AT2G31870.1 Phypa1|24954  
 Phypa1|484  
 AT2G31530.1 Phypa1|1432  
 AT5G26210.1,AT3G42790.1,AT5G20510.1  
 Phypa1|38901,Phypa1|26032,Phypa1|26335,Phypa1|30307,Phypa1|29526,Phypa1|12732,Phypa1|25931  
 AT2G02470.1,AT1G14510.1  
 AT5G05610.1,AT3G11200.1  
 AT1G71990.1 Phypa1|39162  
 AT1G08580.1 Phypa1|31839  
 AT2G32180.1,AT2G32650.1 Phypa1|28350  
 AT2G32840.1,AT1G04930.1 Phypa1|33686  
 AT5G64510.1 Phypa1|26670  
 AT1G47310.1  
 AT2G14835.1 Phypa1|24049,Phypa1|24182  
 AT4G24175.1 Phypa1|7661  
 AT2G46090.1 Phypa1|24976,Phypa1|2629  
 AT2G17265.1 Phypa1|15091  
 AT4G35295.1  
 Phypa1|31308  
 AT1G05350.1 Phypa1|24437  
 AT5G37340.2,AT5G22480.1 Phypa1|33474  
 Phypa1|8223  
 AT1G09580.1,AT1G21900.1,AT1G57620.1 Phypa1|36826,Phypa1|39580  
 AT1G69460.1,AT1G26690.1,AT3G29070.1,AT1G14010.1,AT2G03290.1  
 AT3G10780.1

AT2G03040.1  
 AT5G52030.2 Phypa1|27982  
 AT1G75690.1 Phypa1|262,Phypa1|800  
 AT2G34860.1 Phypa1|34241,Phypa1|39442  
 AT3G01435.1 Phypa1|39247,Phypa1|27701  
 AT3G27530.1 Phypa1|38061  
 AT5G64230.1,AT3G19920.1 Phypa1|27116,Phypa1|12080  
 AT5G20520.1 Phypa1|38934  
 AT4G12760.1 Phypa1|25280  
 AT1G07970.1 Phypa1|33777  
 AT1G03650.1 Phypa1|25306  
 AT5G35690.1 Phypa1|24125  
 AT5G17250.1 Phypa1|37713  
 AT3G54826.1 Phypa1|26698  
 AT5G30490.1 Phypa1|34317  
 AT4G34412.1 Phypa1|29657  
 AT3G25940.1 Phypa1|2442  
 AT3G62140.1 Phypa1|33366  
 AT1G08760.1 Phypa1|21410,Phypa1|34113,Phypa1|4116  
 AT3G14170.1,AT1G70340.1,AT1G23790.1,AT3G19610.1,AT2G31920.1,AT4G13370.1  
 Phypa1|2222,Phypa1|2223,Phypa1|2224  
 AT5G48470.1 Phypa1|35029  
 AT2G03800.1 Phypa1|36788,Phypa1|18755  
 AT5G09230.1 Phypa1|25112  
 AT5G41650.1,AT1G64185.1 Phypa1|35501  
 AT1G79070.1 Phypa1|802  
 AT5G52220.1 Phypa1|835  
 AT5G38720.1 Phypa1|32380  
 AT1G33240.1 Phypa1|952,Phypa1|27149  
 AT1G76880.1,AT1G76890.2  
 AT5G03680.1,AT3G10000.1  
 AT5G28300.1  
 AT5G47660.1  
 Phypa1|10899,Phypa1|5452  
 AT2G37970.1 Phypa1|36141  
 AT5G12260.1 Phypa1|49  
 AT5G47560.1 Phypa1|27548  
 AT4G09010.1 Phypa1|26081,Phypa1|25580  
 AT5G06620.1 Phypa1|37340  
 AT4G33410.1 Phypa1|34223  
 Phypa1|9208  
 AT1G60080.1 Phypa1|36164  
 AT3G07750.1 Phypa1|37405  
 AT1G04940.1 Phypa1|10564  
 AT3G22590.1 Phypa1|38255  
 AT5G23600.1,AT2G45330.1 Phypa1|37630  
 ATMG00650.1 Phypa1|30153  
 ATCG01070.1 Phypa1|31047  
 AT1G66680.1 Phypa1|1445  
 Phypa1|18982  
 AT3G56120.1 Phypa1|28641  
 AT5G44300.1,AT2G33830.2,AT1G28330.3 Phypa1|29773  
 AT1G20810.1 Phypa1|16780  
 AT5G45430.1,AT4G19110.2 Phypa1|28635,Phypa1|3072,Phypa1|36256  
 AT4G01370.1,AT2G46070.1 Phypa1|26495  
 AT2G18170.1,AT1G10210.1,AT4G36450.1,AT1G59580.1 Phypa1|34024,Phypa1|37602  
 AT1G53510.1,AT3G14720.1,AT2G42880.1 Phypa1|27191,Phypa1|27019  
 AT3G54180.1,AT2G38620.2 Phypa1|39680,Phypa1|25824  
 AT4G13020.3  
 AT1G07880.2  
 AT4G11330.1  
 AT1G01560.1  
 AT3G59790.1,AT2G43790.1  
 AT3G45640.1  
 AT4G01595.1  
 AT5G19010.1  
 AT3G18040.1,AT1G18150.1  
 AT1G73670.1  
 AT2G01450.1  
 Phypa1|37278  
 Phypa1|1575  
 Phypa1|2557,Phypa1|23945  
 Phypa1|23751,Phypa1|27452  
 Phypa1|36906  
 Phypa1|2607  
 Phypa1|33133,Phypa1|24444,Phypa1|2624  
 AT1G62570.1,AT1G62580.1,AT1G12130.1,AT1G12140.1,AT1G62620.1,AT1G12160.1,AT1G62560.1,AT1G12200.1,AT1G62540.1,AT1G63340.1,AT1G65860.1,AT1G62600.1,AT1G63370.1 Phypa1|38219  
 AT5G07800.1,AT5G61290.1  
 AT1G63390.1  
 AT1G68100.1 Phypa1|20253  
 AT2G34470.2 Phypa1|2774

AT5G65860.1 Phypa1|38693  
 AT4G04870.1 Phypa1|33309  
 AT1G66330.1 Phypa1|28232,Phypa1|26262,Phypa1|33170  
 AT1G21760.1 Phypa1|38896  
 AT3G58600.1 Phypa1|29428  
 AT1G03900.1 Phypa1|189  
 AT1G67325.1 Phypa1|28215  
 AT2G17380.1,AT4G35410.2 Phypa1|39401,Phypa1|27754  
 AT2G19790.1 Phypa1|38128  
 AT1G47830.1 Phypa1|39377,Phypa1|37767  
 AT3G50860.1 Phypa1|27966  
 AT1G03030.1 Phypa1|37461  
 AT3G53900.2 Phypa1|28030  
 AT4G20410.1 Phypa1|39769  
 AT3G07790.1 Phypa1|34867  
 AT1G18060.1 Phypa1|28079  
 AT3G09580.1 Phypa1|35460  
 AT1G08620.1 Phypa1|27960  
 AT1G63490.1 Phypa1|17374,Phypa1|17365  
 AT2G34880.1,AT1G30810.1  
 AT4G20400.1  
 AT2G38950.1  
 Phypa1|8696  
 Phypa1|35899  
 AT3G58010.1,AT2G42130.3 Phypa1|30219  
 AT2G30695.1 Phypa1|25760  
 AT4G31790.1 Phypa1|37985  
 AT5G63040.1 Phypa1|1953  
 AT1G48460.1  
 AT1G60600.1 Phypa1|26666  
 AT4G16580.1,AT5G66720.1 Phypa1|25610  
 AT2G30170.1 Phypa1|29723,Phypa1|25950  
 AT4G33500.1  
 Phypa1|34763  
 AT3G61540.1 Phypa1|39421  
 AT5G55540.1 Phypa1|33245,Phypa1|35534  
 AT1G08750.1 Phypa1|34936  
 AT2G01770.1 Phypa1|26930  
 AT1G76480.1,AT1G20890.1 Phypa1|5339  
 AT3G01640.1 Phypa1|23702  
 AT5G14470.1  
 AT2G46890.1 Phypa1|32630  
 AT3G43300.1 Phypa1|25219  
 AT3G60860.1,AT1G01960.1 Phypa1|39478,Phypa1|36033  
 AT4G38200.1,AT4G35380.1  
 Phypa1|16155,Phypa1|1352  
 Phypa1|25226,Phypa1|27870,Phypa1|30297  
 Phypa1|27878  
 Phypa1|15735  
 Phypa1|23586  
 AT3G47450.1 Phypa1|930  
 AT4G28830.1 Phypa1|39238  
 AT5G52880.1 Phypa1|32177,Phypa1|1975  
 AT4G01650.1 Phypa1|238  
 AT5G13070.1 Phypa1|38391,Phypa1|18293  
 AT4G38495.1 Phypa1|3079  
 Phypa1|836  
 AT4G24900.1 Phypa1|4861  
 AT5G37130.1,AT5G17270.1 Phypa1|27181  
 AT4G02760.1,AT4G02740.1,AT4G02733.1 Phypa1|31864  
 AT1G12650.1 Phypa1|16444  
 AT1G72020.1 Phypa1|31017  
 AT2G01350.1 Phypa1|29037  
 AT2G21820.1 Phypa1|25314  
 AT3G06200.1 Phypa1|24432  
 AT5G66290.1 Phypa1|35267,Phypa1|36746  
 AT5G52100.1 Phypa1|30832  
 AT2G41530.1 Phypa1|26561  
 AT5G10780.1 Phypa1|2422  
 AT1G19130.1 Phypa1|28942  
 AT2G40430.1 Phypa1|36049  
 AT1G45976.1 Phypa1|24472,Phypa1|1477,Phypa1|34331,Phypa1|39061,Phypa1|38176  
 AT5G47050.1,AT1G32740.1,AT4G17680.1  
 AT4G35070.1  
 AT1G60610.1,AT1G10650.1  
 AT2G31040.1 Phypa1|1908  
 AT5G48960.1 Phypa1|26422,Phypa1|24764  
 AT2G23890.1 Phypa1|30659  
 AT4G30580.1 Phypa1|28526  
 AT1G08550.1 Phypa1|28477  
 AT3G20790.1 Phypa1|25074,Phypa1|26334  
 Phypa1|34665

AT5G15170.1 Phypa1|28180  
 AT4G20150.1 Phypa1|36362,Phypa1|875  
 AT2G06025.1 Phypa1|11236  
 AT1G67620.1 Phypa1|15654  
 AT3G53970.1 Phypa1|28380  
 AT1G48530.1  
 AT4G21460.1,AT3G18240.1 Phypa1|5417  
 AT3G18790.1 Phypa1|23953  
 AT5G45360.1 Phypa1|27241  
 AT1G01860.1 Phypa1|32393  
 AT5G10700.1 Phypa1|25176  
 AT1G71480.1 Phypa1|25467  
 AT3G05625.1 Phypa1|38015  
 AT1G12230.1 Phypa1|24235  
 AT5G51170.1 Phypa1|28670  
 ATCG01050.1 Phypa1|31042  
 ATMG00580.1  
 AT2G25830.1 Phypa1|7975  
 AT3G61800.1 Phypa1|32994  
 AT4G39690.1 Phypa1|35610  
 AT1G69545.1  
 Phypa1|35953,Phypa1|25806,Phypa1|26656,Phypa1|37059,Phypa1|29065,Phypa1|28937,Phypa1|435,Phypa1|27619,Phypa1|931,Phypa1|27618,Phypa1|38982,Phypa1|28669,Phypa1|30567,Phypa1|35,Phypa1|24443,Phypa1|25175,Phypa1|37484,Phypa1|30384,Phypa1|432,Phypa1|3462,Phypa1|25168  
 AT2G17440.1,AT4G35470.1 Phypa1|35705  
 AT5G45510.1  
 Phypa1|38066,Phypa1|24450,Phypa1|30966,Phypa1|31214,Phypa1|24397,Phypa1|28428,Phypa1|28422,Phypa1|27603,Phypa1|25496,Phypa1|17026,Phypa1|30511,Phypa1|1420,Phypa1|1053,Phypa1|31262,Phypa1|27155,Phypa1|1418,Phypa1|1351,Phypa1|31,Phypa1|30326,Phypa1|27622,Phypa1|25795,Phypa1|28555  
 Phypa1|29311,Phypa1|26068,Phypa1|26737,Phypa1|31248,Phypa1|30969,Phypa1|123,Phypa1|25167,Phypa1|28664,Phypa1|30259,Phypa1|30316,Phypa1|1029,Phypa1|25594,Phypa1|29298,Phypa1|28701,Phypa1|29277,Phypa1|430,Phypa1|36279,Phypa1|25174,Phypa1|30619,Phypa1|30314,Phypa1|27615,Phypa1|31226,Phypa1|27,Phypa1|27617,Phypa1|28770,Phypa1|26977,Phypa1|31208,Phypa1|31249,Phypa1|24863,Phypa1|27388,Phypa1|28676,Phypa1|1017,Phypa1|26108,Phypa1|1071,Phypa1|4,Phypa1|1058,Phypa1|31263,Phypa1|29407,Phypa1|26099,Phypa1|894,Phypa1|28056,Phypa1|29680,Phypa1|27157  
 Phypa1|26025,Phypa1|28237,Phypa1|27351,Phypa1|28541,Phypa1|27710,Phypa1|26111,Phypa1|30967,Phypa1|28203,Phypa1|25633,Phypa1|26720  
 Phypa1|26885  
 Phypa1|26995,Phypa1|26708,Phypa1|1069,Phypa1|25126,Phypa1|1066  
 Phypa1|26079,Phypa1|29342  
 Phypa1|24730,Phypa1|16476,Phypa1|29196  
 Phypa1|35960,Phypa1|37857  
 Phypa1|25379,Phypa1|1510,Phypa1|25874  
 Phypa1|1055  
 Phypa1|30267,Phypa1|892,Phypa1|25983  
 Phypa1|28466  
 Phypa1|27216,Phypa1|29459,Phypa1|336,Phypa1|24853  
 Phypa1|38150  
 Phypa1|34246,Phypa1|1014,Phypa1|27559,Phypa1|29645  
 Phypa1|26486  
 Phypa1|34712  
 AT5G26240.1 Phypa1|30118,Phypa1|39102  
 AT3G27170.1,AT5G33280.1,AT5G49890.1,AT5G40890.1 Phypa1|23730  
 Phypa1|35507,Phypa1|34737  
 Phypa1|14533  
 AT3G08650.2 Phypa1|38253  
 ATCG00730.1 Phypa1|31405  
 AT3G48380.1 Phypa1|34946  
 AT5G18200.1 Phypa1|36707,Phypa1|29367  
 AT1G68990.1,AT5G15700.1,AT2G24120.1 Phypa1|39423,Phypa1|37776,Phypa1|39441  
 AT3G51980.1 Phypa1|28334  
 AT1G48050.1 Phypa1|37152  
 AT1G34780.1,AT4G08930.1 Phypa1|1988  
 AT1G49975.1 Phypa1|35656  
 AT1G73680.1,AT3G01420.1 Phypa1|37393  
 AT3G01910.1 Phypa1|29405,Phypa1|37531  
 Phypa1|13801  
 AT3G53630.1 Phypa1|256,Phypa1|34511  
 Phypa1|730  
 AT5G45590.1 Phypa1|32282  
 AT5G04520.1 Phypa1|36157  
 AT5G06260.1,AT4G34070.1 Phypa1|35254  
 AT5G08540.1 Phypa1|1945  
 AT4G38440.1 Phypa1|9818,Phypa1|26336  
 AT1G17050.1,AT1G78510.1 Phypa1|28874,Phypa1|26371  
 AT2G34630.2 Phypa1|26426,Phypa1|4214  
 Phypa1|31452  
 Phypa1|23296  
 Phypa1|31289  
 AT2G17695.1 Phypa1|32239  
 AT4G20910.1,AT4G20920.1 Phypa1|29724  
 AT5G67490.1 Phypa1|1671

AT1G56345.1 Phypa1|28041,Phypa1|26812  
 AT2G44520.1 Phypa1|1887  
 AT1G73180.1 Phypa1|39286  
 AT3G05510.1 Phypa1|134  
 AT4G29520.1 Phypa1|24951  
 AT5G50960.1 Phypa1|36661  
 AT5G19350.1 Phypa1|39677,Phypa1|62,Phypa1|61  
 AT1G47500.1,AT3G19130.1,AT1G47490.1,AT1G49600.1  
 AT5G54900.1,AT4G27000.1,AT1G11650.2  
 AT3G11620.1 Phypa1|36547  
 AT4G10970.1,AT4G23910.1 Phypa1|32662  
 AT5G45420.1 Phypa1|36785  
 Phypa1|31733,Phypa1|32726  
 AT5G42970.1 Phypa1|37700  
 AT4G23895.1 Phypa1|31672,Phypa1|2055  
 AT3G60810.1 Phypa1|24817  
 AT4G18240.1 Phypa1|25896,Phypa1|25305,Phypa1|24375  
 AT1G11720.1  
 Phypa1|29840,Phypa1|12041,Phypa1|12039,Phypa1|19031  
 Phypa1|38471  
 AT5G20660.1 Phypa1|27557,Phypa1|2588  
 AT1G29070.1 Phypa1|6880,Phypa1|32231  
 AT4G38110.1 Phypa1|27367  
 AT4G37830.1 Phypa1|23812  
 Phypa1|14671  
 AT5G38890.1 Phypa1|37689  
 AT5G37360.1 Phypa1|31978  
 AT3G28670.1 Phypa1|35037  
 Phypa1|4677  
 AT4G01320.1 Phypa1|35592,Phypa1|39529  
 AT2G26470.1 Phypa1|33853  
 AT1G80770.1 Phypa1|28158  
 AT1G25420.1 Phypa1|25570,Phypa1|27016  
 AT4G29440.1,AT2G19710.1,AT1G34220.1,AT4G35730.1  
 AT1G13340.1  
 AT2G14830.1  
 AT3G15490.1  
 AT1G51900.1  
 AT2G31440.1 Phypa1|37179,Phypa1|26290  
 AT1G17870.1 Phypa1|28342,Phypa1|39690  
 AT3G12030.1,AT5G06660.1 Phypa1|37725  
 AT2G36305.1 Phypa1|24989  
 AT3G13226.1 Phypa1|15203  
 AT4G29170.1 Phypa1|38530  
 AT3G20430.1 Phypa1|34983  
 AT4G19160.2 Phypa1|33307,Phypa1|28456  
 AT1G26810.1,AT3G06440.1 Phypa1|29434  
 AT1G74800.1,AT1G27120.1,AT5G62620.1,AT4G21060.1 Phypa1|2949,Phypa1|14880  
 AT3G26380.1 Phypa1|38810  
 AT3G51130.1 Phypa1|24737,Phypa1|26488  
 AT3G12260.1 Phypa1|35974,Phypa1|37327  
 AT1G77140.1 Phypa1|36321  
 AT4G15770.1 Phypa1|38931  
 AT1G09230.1 Phypa1|27769  
 Phypa1|32867  
 AT5G41150.1 Phypa1|38174  
 AT1G26660.1 Phypa1|27147  
 AT5G51690.1,AT3G49700.1,AT1G62960.1,AT5G65800.1,AT4G37770.1,AT2G22810.1 Phypa1|37721  
 AT4G08040.1,AT4G11280.1,AT3G61510.1,AT4G26200.1,AT1G01480.1  
 AT5G28360.1  
 Phypa1|8062  
 AT5G49970.1 Phypa1|37979  
 AT1G22750.2 Phypa1|15031,Phypa1|3727  
 AT1G13870.1 Phypa1|27355  
 Phypa1|35722  
 AT1G65420.1 Phypa1|2097  
 AT3G56830.1  
 AT3G49080.1 Phypa1|30168  
 AT3G17465.1 Phypa1|26228  
 AT1G80500.1 Phypa1|34145  
 AT5G01230.1 Phypa1|23961  
 AT2G25950.1 Phypa1|33591  
 AT3G19820.1 Phypa1|37205,Phypa1|113750  
 AT1G13900.1,AT2G03450.1 Phypa1|25288,Phypa1|36553,Phypa1|27563  
 AT1G13750.1,AT5G50400.1,AT4G24890.1 Phypa1|24343,Phypa1|25809  
 AT1G13760.1  
 Phypa1|22563  
 Phypa1|29774  
 AT2G47960.1 Phypa1|32075  
 ATCG00720.1 Phypa1|6255  
 AT3G55160.1 Phypa1|27783  
 AT2G30350.2 Phypa1|17656

AT1G67690.1 Phypa1|6848,Phypa1|37454  
 AT2G07340.1 Phypa1|39553  
 AT4G16710.1 Phypa1|29255  
 AT5G46620.1,AT4G17960.1 Phypa1|35801,Phypa1|34489  
 AT4G29850.1,AT2G19350.1 Phypa1|27635  
 AT1G64510.1 Phypa1|25391,Phypa1|30274  
 AT3G16270.1 Phypa1|39785  
 AT1G78590.1 Phypa1|36740  
 AT2G20690.1 Phypa1|37993  
 AT5G02160.1 Phypa1|1664,Phypa1|1663  
 AT3G06530.1 Phypa1|10169  
 Phypa1|36791  
 AT2G19560.1 Phypa1|37932  
 AT1G02680.1 Phypa1|838,Phypa1|1239  
 AT3G54900.1 Phypa1|29041,Phypa1|30540  
 AT2G38270.1 Phypa1|30791  
 AT3G15660.1 Phypa1|24307,Phypa1|24683  
 AT4G32580.1,AT4G04950.1 Phypa1|26991,Phypa1|39053,Phypa1|38600  
 AT1G48175.1 Phypa1|14310  
 AT2G37330.1 Phypa1|24792  
 AT3G55250.1 Phypa1|2014  
 AT4G00026.1 Phypa1|35549  
 AT4G01040.1 Phypa1|37406  
 AT1G07210.1 Phypa1|27272  
 AT1G11480.1 Phypa1|34477  
 AT1G75450.1,AT2G41510.1,AT3G63440.1  
 Phypa1|39789,Phypa1|55,Phypa1|29034,Phypa1|956,Phypa1|474,Phypa1|37672  
 AT5G21482.1  
 AT4G29740.2,AT5G56970.1,AT2G19500.1  
 AT1G73060.1 Phypa1|28798  
 AT5G48790.1 Phypa1|26442  
 AT1G48170.1 Phypa1|33378  
 AT5G51740.1 Phypa1|36863  
 AT5G47570.1 Phypa1|24806  
 AT1G76060.1 Phypa1|36743  
 AT3G26570.1 Phypa1|29133  
 Phypa1|17991  
 Phypa1|35056  
 AT4G17760.1 Phypa1|38708  
 AT4G24620.1 Phypa1|26376  
 Phypa1|13185  
 AT1G73740.1 Phypa1|38329  
 Phypa1|30947  
 AT3G45100.1 Phypa1|38944  
 AT4G32750.1 Phypa1|38775,Phypa1|37423  
 AT2G02510.1,AT1G14450.1 Phypa1|28900,Phypa1|27086  
 AT1G34630.1 Phypa1|38040  
 AT5G19300.1 Phypa1|998  
 AT3G10220.1 Phypa1|28195  
 AT5G11680.1 Phypa1|38533  
 AT5G54290.1 Phypa1|29410  
 AT5G19540.1 Phypa1|1878  
 AT1G67840.1 Phypa1|34031  
 AT5G41880.1 Phypa1|27271  
 AT1G62780.1 Phypa1|2463  
 AT2G01640.1 Phypa1|35702  
 AT4G20070.1 Phypa1|24325,Phypa1|30383  
 AT5G49570.1 Phypa1|30172  
 AT4G25140.1,AT2G25890.1,AT3G27660.1,AT5G51210.1,AT3G01570.1 Phypa1|10824,Phypa1|5659  
 AT5G40420.1,AT5G07550.1  
 AT1G48990.1,AT3G18570.1  
 AT5G07560.1  
 Phypa1|1230  
 AT3G61080.1 Phypa1|33473  
 Phypa1|7364  
 AT4G02405.1 Phypa1|2549  
 AT3G46220.1 Phypa1|39521  
 AT1G31410.1 Phypa1|26080  
 AT5G07960.1 Phypa1|39488  
 AT4G03090.1 Phypa1|16713  
 AT5G39250.1 Phypa1|24621  
 AT1G16445.1 Phypa1|2721  
 Phypa1|31325  
 AT2G48070.1 Phypa1|30959  
 AT1G30130.1 Phypa1|29847  
 AT3G15160.1 Phypa1|36119,Phypa1|24818  
 AT1G55915.1 Phypa1|26854  
 AT5G39590.1 Phypa1|28841,Phypa1|29547  
 AT5G16060.1 Phypa1|26103  
 AT5G50110.1 Phypa1|3032  
 AT5G53310.1 Phypa1|19509  
 AT5G13110.1,AT1G24280.1 Phypa1|23827,Phypa1|36366,Phypa1|38604,Phypa1|39611

AT3G27300.1,AT5G40760.1 Phypa1|24216,Phypa1|36787,Phypa1|24211  
 AT5G35790.1  
     Phypa1|3065  
 AT1G73240.1 Phypa1|30546  
 AT5G48020.1 Phypa1|23852,Phypa1|35114  
 AT3G04560.1 Phypa1|34386  
 AT1G77890.1,AT4G08540.1 Phypa1|39475  
 AT1G20410.1 Phypa1|38091  
 AT2G05320.1 Phypa1|39654,Phypa1|24745  
 AT2G24860.1 Phypa1|2173  
 AT3G04480.1 Phypa1|915  
 AT4G37540.1,AT3G49940.1,AT5G67420.1 Phypa1|2106,Phypa1|2111,Phypa1|25225  
 AT3G02550.1,AT1G68510.1,AT1G67100.1  
     Phypa1|14022,Phypa1|37588  
     Phypa1|8620  
     Phypa1|8729  
     Phypa1|30780  
 AT3G27050.1 Phypa1|735,Phypa1|25270  
 AT2G17972.1 Phypa1|33745  
 AT1G76450.1 Phypa1|36068  
 AT2G29530.1 Phypa1|36254  
 AT3G15840.1 Phypa1|27450,Phypa1|39479,Phypa1|32284  
 AT4G39440.1 Phypa1|30750,Phypa1|26407  
     Phypa1|29552  
 AT4G18460.1 Phypa1|24728  
 AT5G42850.1 Phypa1|30217  
 AT1G78610.1,AT2G17000.1,AT1G53470.1,AT3G14810.1 Phypa1|24390,Phypa1|39114,Phypa1|38520  
 AT5G19520.1,AT5G12080.1  
 AT1G49260.1  
 AT2G17010.1  
     Phypa1|24684,Phypa1|26382  
 AT5G10620.1 Phypa1|30060  
 AT5G08170.1 Phypa1|25724  
     Phypa1|32536  
 AT5G40530.2 Phypa1|25231  
 AT1G72560.1 Phypa1|27628  
 AT3G13440.1 Phypa1|33380  
 AT5G17610.1 Phypa1|34378,Phypa1|25160  
     Phypa1|35351  
 AT3G59390.1 Phypa1|29266  
 AT4G00560.1 Phypa1|31869  
 AT4G03200.1 Phypa1|38370  
 AT5G36950.1 Phypa1|32976  
 AT5G40200.1 Phypa1|37470  
 AT1G65640.1,AT1G65630.1,AT3G16540.1  
 AT5G54745.1,AT1G51150.1  
 AT3G16550.1  
 AT5G40560.1  
     Phypa1|9669  
     Phypa1|15354,Phypa1|3171  
     Phypa1|31669  
 AT2G26460.1 Phypa1|37891  
 AT1G49820.1 Phypa1|25011  
 AT2G03420.1 Phypa1|25351  
 AT1G02870.1 Phypa1|35659  
 AT5G32470.1 Phypa1|27816  
 AT2G21070.1 Phypa1|30282  
 AT5G48390.1 Phypa1|29205  
     Phypa1|16544  
 AT3G06610.1 Phypa1|37783  
 AT2G37680.1 Phypa1|28672  
     Phypa1|18440  
 AT1G11760.1 Phypa1|23938  
 AT5G10810.1 Phypa1|39303,Phypa1|39331  
 AT3G17900.1 Phypa1|34086  
 AT5G04910.1 Phypa1|9031  
 AT5G12130.1 Phypa1|36474  
 AT3G49100.1 Phypa1|2956,Phypa1|38806  
 AT5G51130.1 Phypa1|33665  
 AT3G47650.1 Phypa1|1659  
 AT4G27640.1 Phypa1|39129  
 AT5G19820.1 Phypa1|34677,Phypa1|38432  
 AT1G16590.1 Phypa1|28217,Phypa1|39127  
 AT4G23860.1 Phypa1|32011,Phypa1|28993  
 AT2G03510.1 Phypa1|25925,Phypa1|3150  
 AT3G10405.1 Phypa1|35194  
 AT3G58830.1 Phypa1|24963  
 AT4G33925.1 Phypa1|36950  
 AT5G16940.1 Phypa1|23668  
 AT4G24090.1 Phypa1|24266  
 AT2G30942.1 Phypa1|37294,Phypa1|27663  
 AT1G16300.1,AT1G79530.1 Phypa1|29890,Phypa1|29892



AT3G04120.1,AT1G13440.1 Phypa1|24119,Phypa1|39632  
Phypa1|31464  
Phypa1|2662  
Phypa1|26242,Phypa1|2836,Phypa1|26240,Phypa1|23689,Phypa1|37478,Phypa1|30069  
AT3G29010.1 Phypa1|37799  
AT1G53120.1 Phypa1|25994  
AT2G44870.1 Phypa1|25793  
AT2G41120.1 Phypa1|1114  
AT1G44920.1 Phypa1|206  
AT3G05070.1 Phypa1|299  
AT4G34700.1 Phypa1|31856  
AT3G54360.1 Phypa1|24996  
AT5G51220.1 Phypa1|24758  
AT1G19800.1 Phypa1|26611  
AT5G40670.1 Phypa1|38682  
AT3G58490.1 Phypa1|25333,Phypa1|24859  
AT1G06590.1 Phypa1|410  
AT2G35790.1 Phypa1|28242  
AT1G31170.1 Phypa1|28359  
AT2G20490.1 Phypa1|37892  
AT4G21150.1 Phypa1|204  
AT5G27560.1 Phypa1|26502  
AT1G53710.1 Phypa1|39728  
AT1G66510.1 Phypa1|39045  
AT5G11810.1 Phypa1|38464,Phypa1|5676  
AT4G38240.1 Phypa1|38915  
Phypa1|17682  
AT3G14940.1,AT1G53310.1  
Phypa1|34402,Phypa1|26074,Phypa1|15097,Phypa1|38826,Phypa1|36274,Phypa1|39617  
AT3G42628.1,AT2G42600.1  
AT1G68750.1  
AT1G74280.1,AT1G74300.1,AT2G36290.1,AT3G48410.1,AT3G03240.1,AT3G54240.1,AT1G74290.1,AT3G03230.1,A  
T1G08310.1,AT5G22460.1 Phypa1|20762,Phypa1|20761  
AT3G44520.1  
AT3G44510.1  
Phypa1|28377  
AT2G30290.1,AT3G52850.1,AT2G14740.1,AT2G14720.1  
Phypa1|24406,Phypa1|26935,Phypa1|25976,Phypa1|25970,Phypa1|29208,Phypa1|28918,Phypa1|21279  
AT1G30900.1,AT2G34940.1,AT4G20110.1  
Phypa1|1375  
AT5G05580.1,AT3G11170.1 Phypa1|38731,Phypa1|36695,Phypa1|27427  
AT3G12120.1 Phypa1|36283,Phypa1|36177  
AT2G29980.1  
Phypa1|29429,Phypa1|2511  
Phypa1|37291  
AT1G54570.1 Phypa1|36011,Phypa1|27882  
AT5G41130.1,AT3G26820.1,AT3G26840.1,AT5G41120.1  
AT3G02030.1  
Phypa1|23754  
AT3G14550.1,AT3G14530.1,AT2G18640.1,AT3G29430.1,AT2G23800.1,AT2G18620.1,AT4G36810.1,AT3G14510.1,A  
T3G32040.1 Phypa1|15039,Phypa1|38170  
AT1G49530.1,AT3G20160.1  
AT4G38460.1  
Phypa1|31370  
AT1G61065.1,AT4G27435.1,AT1G13380.1,AT3G15480.1,AT1G52910.1  
Phypa1|39142,Phypa1|37653,Phypa1|24146,Phypa1|32603,Phypa1|28417,Phypa1|28473  
AT1G68220.1  
Phypa1|1657  
Phypa1|13168,Phypa1|32970  
AT5G14740.1,AT1G70410.2,AT3G01500.2,AT1G23730.1 Phypa1|38416,Phypa1|32699  
AT4G33580.2  
Phypa1|29558,Phypa1|27053,Phypa1|26119,Phypa1|23984  
Phypa1|34568  
AT3G08580.1,AT4G28390.1,AT5G13490.1  
Phypa1|30662,Phypa1|30665,Phypa1|29592,Phypa1|38115,Phypa1|29589,Phypa1|26764  
AT5G56450.1 Phypa1|24004,Phypa1|39425  
AT5G17400.1  
Phypa1|3020  
AT4G14350.1,AT3G23310.1 Phypa1|10947,Phypa1|25340,Phypa1|27199  
AT1G03920.1,AT2G20470.1  
AT1G30640.1  
Phypa1|31776,Phypa1|33518,Phypa1|33530  
AT1G51340.2,AT3G08040.1 Phypa1|24825,Phypa1|11090,Phypa1|19136  
AT2G38330.1  
AT4G38380.1  
AT5G35970.1 Phypa1|37701  
AT5G42660.1 Phypa1|26751  
AT4G38500.1 Phypa1|39080  
AT1G34550.1,AT4G09630.1 Phypa1|29083  
AT1G28240.1,AT1G53040.1 Phypa1|36140,Phypa1|37878  
AT2G02910.1  
AT5G46220.1

Phypa1|19797  
 AT2G02150.1 Phypa1|26837,Phypa1|26345  
 Phypa1|12744  
 AT3G01510.1 Phypa1|30190  
 AT2G30710.1 Phypa1|13436  
 AT1G21710.1 Phypa1|572  
 AT2G47490.1,AT1G25380.1 Phypa1|31883,Phypa1|24198  
 AT4G11440.1,AT5G42130.1  
 Phypa1|30835,Phypa1|1985,Phypa1|37281,Phypa1|35585,Phypa1|28356,Phypa1|10884,Phypa1|1993,Phypa1|1441,Phypa1|30263,Phypa1|25269,Phypa1|27916,Phypa1|31920,Phypa1|29378,Phypa1|36882,Phypa1|39262,Phypa1|36201,Phypa1|28740,Phypa1|26316,Phypa1|27604,Phypa1|26520,Phypa1|37039,Phypa1|25484,Phypa1|31564,Phypa1|21302,Phypa1|36855  
 AT1G78180.1,AT2G37890.1,AT2G30160.1,AT1G14560.1,AT4G39460.1,AT5G46800.1,AT3G21390.1,AT4G32400.1,AT4G26180.1,AT1G07025.1,AT1G34065.1,AT1G07030.1,AT5G66380.1,AT5G64970.1,AT3G55640.1,AT1G79900.1,AT3G20240.1,AT3G53940.1,AT5G48970.1,AT4G01100.1,AT1G74240.1,AT5G01500.1,AT3G51870.1,AT2G33820.1  
 Phypa1|29439,Phypa1|36636,Phypa1|630,Phypa1|1489,Phypa1|35255,Phypa1|37804,Phypa1|27292,Phypa1|3081,Phypa1|10590,Phypa1|30998,Phypa1|27490,Phypa1|2298  
 Phypa1|27758  
 Phypa1|39546  
 Phypa1|3201  
 AT2G19460.1,AT5G11970.1 Phypa1|28278,Phypa1|27144  
 AT3G05725.1  
 AT4G09890.1  
 AT1G72720.1  
 Phypa1|851,Phypa1|38831  
 AT1G05780.1,AT2G31710.1 Phypa1|20489  
 AT5G49880.1 Phypa1|1763  
 AT5G15880.1 Phypa1|32575  
 AT1G72990.1 Phypa1|38611,Phypa1|28293  
 AT5G53430.1,AT4G27910.1 Phypa1|29168,Phypa1|26180  
 AT5G42400.1 Phypa1|27514,Phypa1|28062  
 AT3G61740.1  
 Phypa1|17483  
 Phypa1|25278  
 AT4G26750.1 Phypa1|2819  
 AT4G24500.1 Phypa1|33672  
 AT1G79200.1 Phypa1|34247  
 AT4G21820.1 Phypa1|32007  
 AT2G44820.1 Phypa1|4448  
 AT5G53940.1 Phypa1|36186,Phypa1|17128,Phypa1|37495,Phypa1|38569  
 AT4G27745.1 Phypa1|37641,Phypa1|37540  
 AT2G40110.1,AT3G11230.1,AT3G08990.1,AT3G55890.1  
 AT4G27740.1  
 AT1G74150.1,AT1G18610.1 Phypa1|24574  
 AT2G32850.2 Phypa1|33799  
 AT1G04210.1 Phypa1|37236  
 AT4G00090.1 Phypa1|37714  
 AT5G22320.1 Phypa1|32083  
 AT5G01750.2,AT2G14560.1,AT3G11740.1,AT1G33840.1,AT3G16900.1  
 Phypa1|34180,Phypa1|24199,Phypa1|14521  
 AT2G30270.1  
 AT3G56180.1  
 Phypa1|33586,Phypa1|32903  
 Phypa1|27962  
 AT1G16540.1 Phypa1|25350  
 AT1G17690.1 Phypa1|34433  
 AT3G53760.1 Phypa1|38466  
 AT1G22870.1,AT1G71410.1 Phypa1|23999  
 AT2G36400.1,AT2G22840.1,AT4G37740.1 Phypa1|2098,Phypa1|1558  
 AT5G53660.1,AT4G24150.1  
 AT2G45480.1  
 AT2G06200.1  
 AT5G03160.1 Phypa1|1848  
 AT1G33400.1 Phypa1|24938  
 AT1G06560.1 Phypa1|431  
 AT2G29720.1,AT2G35660.1 Phypa1|24410  
 AT5G05320.1,AT4G38540.1  
 AT4G15760.1  
 AT4G15765.1  
 Phypa1|1005  
 AT3G63330.1 Phypa1|27050  
 AT4G18260.1 Phypa1|2906  
 AT4G29070.1 Phypa1|12064,Phypa1|10450  
 AT5G64630.2 Phypa1|37704  
 AT1G63120.1,AT3G53780.2,AT4G23070.1,AT5G07250.1,AT2G29050.1,AT1G12750.1  
 Phypa1|27126,Phypa1|39771,Phypa1|33656  
 AT1G52580.1  
 AT1G77860.1  
 Phypa1|26836,Phypa1|24508  
 Phypa1|37376,Phypa1|36012  
 AT4G10930.1 Phypa1|34554  
 AT4G10940.1

AT4G17330.1 Phypa1|33613  
 Phypa1|4271  
 AT3G18060.1 Phypa1|33337  
 AT2G01330.1  
 AT3G61780.1 Phypa1|33966  
 AT5G28400.1,AT5G28320.1  
 AT5G52910.1 Phypa1|13570  
 AT4G20350.1 Phypa1|29702  
 AT1G32550.1 Phypa1|27423  
 AT2G35900.1 Phypa1|33381  
 AT1G30960.1 Phypa1|88  
 AT3G23400.1 Phypa1|27026  
 AT1G54870.1,AT3G05260.1 Phypa1|24658,Phypa1|24507  
 AT3G26770.1,AT3G51680.1,AT4G03140.1,AT3G26760.1 Phypa1|26404,Phypa1|38203  
 AT2G17845.1,AT3G46170.1,AT3G55310.1,AT1G63380.1,AT1G62610.3,AT3G55290.1 Phypa1|38527  
 AT5G10050.1,AT5G65205.1 Phypa1|36291,Phypa1|37147  
 AT1G52340.1,AT3G29260.1,AT2G47120.1,AT2G47130.1,AT2G47140.1  
 AT3G42960.1  
 AT2G47150.1,AT3G29250.1  
 Phypa1|31153  
 Phypa1|28589  
 Phypa1|30605  
 Phypa1|31130,Phypa1|30845,Phypa1|30438  
 Phypa1|30939,Phypa1|31077,Phypa1|30851  
 Phypa1|30819  
 Phypa1|31402  
 Phypa1|3092,Phypa1|30842  
 Phypa1|15235  
 Phypa1|22767  
 Phypa1|30014,Phypa1|30044,Phypa1|23309,Phypa1|30002,Phypa1|31468,Phypa1|29992  
 Phypa1|31322  
 AT4G25130.1 Phypa1|35312,Phypa1|24111  
 AT2G18030.1 Phypa1|37466  
 AT5G07470.1,AT5G61640.1  
 Phypa1|23887  
 Phypa1|30001  
 AT3G62330.1 Phypa1|39462  
 AT2G05630.1 Phypa1|34704,Phypa1|38374,Phypa1|312,Phypa1|39446,Phypa1|37613  
 AT4G16520.1  
 AT3G06420.1,AT4G21980.1,AT3G15580.1  
 AT1G62040.1  
 AT4G04620.1  
 AT3G60640.1,AT2G45170.1  
 Phypa1|29418  
 AT5G16610.2 Phypa1|30070,Phypa1|26252  
 AT5G67070.1 Phypa1|25434  
 AT4G13950.1,AT3G16570.1,AT1G28270.1,AT1G02900.1,AT3G05490.1,AT2G33775.1,AT3G23805.1,AT4G15800.1  
 AT1G71800.1 Phypa1|361  
 AT1G57600.1 Phypa1|3162  
 AT1G20050.1 Phypa1|2733  
 AT5G38520.1 Phypa1|36925  
 AT4G25650.2 Phypa1|24701  
 AT3G44880.1 Phypa1|27678,Phypa1|29927  
 AT1G07980.1 Phypa1|19598  
 AT3G09080.1 Phypa1|6082,Phypa1|5956  
 ATCG00890.1,ATCG01250.1 Phypa1|31040  
 AT3G18370.1 Phypa1|24092,Phypa1|35380  
 AT5G58220.1 Phypa1|37533  
 AT3G07530.1 Phypa1|16184  
 AT4G19830.1 Phypa1|2100  
 AT2G21290.1 Phypa1|33490  
 AT1G01880.1 Phypa1|38  
 AT1G15980.1 Phypa1|23841,Phypa1|38864  
 AT2G17020.1 Phypa1|34578  
 AT1G55590.1  
 AT2G42620.1 Phypa1|37333  
 AT5G67140.1 Phypa1|2054  
 AT4G13220.1 Phypa1|34752,Phypa1|19809  
 AT4G00380.1,AT1G80790.1,AT5G59390.1,AT4G01180.1,AT3G12550.1,AT1G15910.1,AT3G48670.1  
 Phypa1|20277,Phypa1|17168  
 AT1G13790.1,AT4G01780.1  
 AT3G29375.1  
 AT2G16490.1  
 Phypa1|9446  
 Phypa1|17157  
 AT5G56930.1 Phypa1|35616  
 AT3G56900.1 Phypa1|33417  
 AT3G03790.2 Phypa1|29141  
 AT5G65540.1 Phypa1|22702,Phypa1|32719  
 AT2G20610.1,AT2G24850.1,AT4G28410.1,AT5G36160.1,AT4G28420.2,AT5G53970.1 Phypa1|39031  
 AT4G23590.1,AT4G23600.1  
 AT2G36885.1 Phypa1|31072

AT3G59630.1 Phypa1|25769  
AT5G27660.1 Phypa1|28710  
AT3G46780.1 Phypa1|29247  
AT5G49810.1 Phypa1|25975,Phypa1|33362  
AT1G29390.1,AT1G29395.1 Phypa1|1229  
AT2G42700.1 Phypa1|28945  
AT2G23390.1 Phypa1|28550  
AT5G05270.1 Phypa1|33784,Phypa1|34217  
AT3G02820.1 Phypa1|35883  
AT5G11330.1 Phypa1|38295  
AT3G44330.1 Phypa1|24099  
AT3G53130.1 Phypa1|37914  
AT4G15110.1 Phypa1|39005  
AT2G40890.1 Phypa1|20149  
AT5G09970.1 Phypa1|23929,Phypa1|38145  
AT5G07990.1 Phypa1|33654,Phypa1|36566,Phypa1|22808,Phypa1|3617,Phypa1|8692,Phypa1|3138  
AT3G26300.1,AT3G26310.1,AT3G44250.1,AT5G25130.1,AT5G24950.1,AT1G13090.1,AT2G30770.1,AT3G26290.1,A  
T5G57260.1,AT3G26200.1,AT4G36220.1,AT2G30750.1,AT3G26180.1,AT3G48270.1,AT3G26330.1,AT1G13100.1,AT  
3G48310.1,AT2G02580.1,AT5G42590.1,AT4G13290.1,AT3G26170.1,AT3G26280.1,AT5G25180.1,AT5G25120.1,AT3  
G48290.1,AT3G26220.1,AT4G13310.1,AT3G48320.1,AT1G13080.1,AT4G31500.1,AT1G11610.1,AT3G48300.1,AT3G  
26210.1,AT3G26320.1,AT3G26190.1,AT3G26230.1,AT4G20240.1,AT4G13770.1,AT5G25140.1,AT2G24180.1,AT3G4  
8280.1,AT5G24960.1 Phypa1|35491,Phypa1|29532,Phypa1|24429,Phypa1|21885,Phypa1|38133  
AT5G25900.1 Phypa1|30142  
AT2G30490.1 Phypa1|29824,Phypa1|28561  
AT1G64930.1,AT1G64900.1,AT2G12190.1,AT3G10560.1,AT5G04660.1,AT1G64940.1,AT3G03470.1,AT1G11600.1,A  
T5G04630.1,AT3G10570.1,AT1G64950.1,AT5G61320.1 Phypa1|25707,Phypa1|1411  
AT1G31800.1 Phypa1|24249  
AT1G74550.1,AT1G74540.1  
AT4G22690.1,AT4G12320.1,AT4G22710.1  
AT2G46660.1,AT3G61880.1,AT1G01190.1  
AT1G13710.1,AT1G74110.1  
AT2G45570.1,AT1G33720.1,AT4G12330.1,AT4G12300.1,AT2G45560.1,AT5G44620.1,AT2G45550.1,AT4G12310.1,A  
T2G45580.1,AT1G33730.1  
AT1G66540.1,AT5G57220.1,AT5G67310.1,AT4G37310.1,AT4G37400.1,AT4G31940.1,AT4G37430.1,AT4G31970.1,A  
T4G37360.1,AT4G31950.1  
AT1G50560.1,AT2G14100.1,AT3G20960.1,AT3G20110.1,AT5G47990.1,AT2G27010.1,AT5G06905.1,AT2G42250.1,A  
T1G50520.1,AT4G15330.1,AT5G42580.1,AT3G32047.1,AT5G06900.1,AT3G20120.1,AT1G28430.1,AT3G20080.1,AT  
3G20140.1,AT4G15350.1,AT3G20100.1,AT2G27000.1,AT4G15380.1,AT2G05180.1,AT3G20940.1,AT3G20090.1,AT3  
G20130.1,AT3G20950.1  
AT4G39950.1,AT1G58260.1,AT5G05260.1,AT1G16410.1,AT1G01280.1,AT1G16400.1,AT2G22330.1,AT5G35917.1  
AT3G53300.1,AT3G53290.1,AT3G26160.1,AT5G04330.1,AT1G13110.1,AT5G35715.1,AT3G53280.1,AT3G26150.1  
AT3G61035.1  
AT3G25180.1,AT2G25160.1  
AT5G35920.1  
AT1G58265.1  
AT2G26170.1  
AT3G26270.1,AT3G26830.1  
AT3G52970.1  
Phypa1|38881,Phypa1|2630  
Phypa1|23899  
Phypa1|29763,Phypa1|25020,Phypa1|34085  
Phypa1|1405  
Phypa1|9092,Phypa1|981,Phypa1|28371,Phypa1|39225  
Phypa1|24290,Phypa1|27519  
Phypa1|28498,Phypa1|38719  
Phypa1|2258  
Phypa1|14667,Phypa1|29959  
Phypa1|8858  
Phypa1|31581  
AT2G44400.1,AT4G10370.1,AT5G55770.1,AT3G28650.1,AT3G11370.1,AT5G40590.1,AT5G01480.1,AT3G27510.1,A  
T3G26550.1,AT2G02630.1,AT2G13950.1,AT5G37210.1,AT5G42840.1,AT2G02700.1,AT4G02540.1,AT2G44390.1,AT  
1G66440.1,AT2G44380.1,AT3G27500.1,AT5G26190.1,AT2G37820.1,AT1G44030.1,AT2G17740.1,AT5G46670.1,AT2  
G27660.1,AT2G42060.1,AT5G46660.1,AT2G37810.1,AT4G09690.1,AT3G27473.1,AT4G26380.1,AT2G37800.1,AT2G  
17600.1,AT5G59940.1,AT5G22355.1,AT5G43520.1,AT5G02330.1,AT2G02680.1,AT5G59930.1,AT2G44370.1,AT1G2  
9180.1,AT2G13900.1,AT1G45243.1,AT2G28270.1,AT3G11402.1 Phypa1|35568,Phypa1|11556,Phypa1|2114  
AT1G55440.1,AT1G34480.1,AT4G02190.1,AT1G65180.1,AT4G01930.1,AT1G66450.1,AT5G43030.1,AT5G17960.1,A  
T2G21850.1,AT4G11550.1,AT3G25850.1,AT1G55430.1,AT3G59120.1,AT1G58037.1,AT5G02340.1,AT4G14980.1,AT  
2G02610.1,AT2G19650.1,AT2G40050.1,AT5G55800.1,AT4G15070.1,AT2G02620.1,AT3G26250.1,AT2G04500.1,AT5  
G02350.1,AT5G54030.1,AT1G44050.1,AT3G07000.1,AT3G50010.1,AT1G55700.1,AT3G27490.1,AT5G37620.1,AT4G  
02180.1,AT1G44020.1,AT5G54050.1,AT1G55390.1,AT5G43040.1,AT2G17590.1,AT1G35610.1,AT5G44770.1,AT2G0  
4680.1,AT5G03360.1,AT3G11390.1,AT1G61710.1,AT3G13760.1,AT2G19660.1,AT2G28460.1,AT1G62030.1,AT3G468  
10.1,AT3G13590.1,AT2G21840.1,AT4G16015.1,AT1G69150.1,AT3G21210.1,AT4G01760.1,AT4G10560.1,AT3G0699  
0.1,AT4G01740.1,AT1G55420.1,AT5G59920.1,AT1G55380.1,AT1G61840.1,AT4G01920.1,AT5G45730.1,AT5G54040.  
1,AT3G45530.1,AT4G01350.1,AT4G11390.1,AT5G55780.1,AT2G21830.1,AT3G26240.1,AT2G02640.1,AT5G40320.1,  
AT4G11540.1,AT5G02360.1,AT2G02690.1,AT1G53340.1,AT3G46800.1,AT5G54020.1,AT3G48400.1,AT3G11385.1,AT  
3G45840.1,AT5G29624.1,AT2G43220.1,AT4G01925.1,AT4G13130.1,AT3G27480.1,AT3G59130.1  
Phypa1|16554  
AT3G43890.1,AT4G01910.1  
AT2G21810.1  
AT2G23100.1,AT5G42280.1  
AT5G48320.1  
AT1G73350.1 Phypa1|3043,Phypa1|2066

AT2G32980.1 Phypa1|2001  
AT3G01520.1,AT5G14680.1 Phypa1|29859,Phypa1|30709  
AT1G09710.1 Phypa1|33809  
AT1G58220.1  
AT2G27350.3 Phypa1|29907  
AT5G49010.1 Phypa1|27629  
AT1G61570.1 Phypa1|24204  
AT1G67060.1 Phypa1|30660  
AT2G31340.1 Phypa1|35452  
AT4G06634.1 Phypa1|1505  
AT4G32810.1 Phypa1|24999  
AT1G72390.1 Phypa1|8578  
AT1G72380.1  
AT3G18730.1 Phypa1|34418  
AT5G24750.1 Phypa1|28020  
AT2G03140.1 Phypa1|3691  
Phypa1|24936  
Phypa1|4632  
AT5G38510.1 Phypa1|97,Phypa1|31785  
AT5G01710.1 Phypa1|28170  
AT5G41190.1 Phypa1|33361  
AT3G17170.1 Phypa1|32518  
Phypa1|22166  
AT2G21350.1,AT4G39040.1 Phypa1|33078  
AT5G49110.1 Phypa1|13926  
AT3G24740.1 Phypa1|26355,Phypa1|38748  
AT3G25910.1  
AT2G26050.1,AT1G15430.1,AT4G08460.1,AT1G80220.1,AT1G68140.1  
AT1G77770.1  
AT4G31410.1  
AT3G62190.1 Phypa1|38691  
AT1G49770.1 Phypa1|3199,Phypa1|34882,Phypa1|33776  
AT2G17900.1 Phypa1|37715  
Phypa1|32341  
AT5G46850.1 Phypa1|32910  
AT5G57460.1 Phypa1|39701  
AT5G51020.1 Phypa1|27537,Phypa1|38685  
AT2G42975.1 Phypa1|34438  
AT4G25840.1,AT5G57440.1 Phypa1|35599  
AT4G38810.2 Phypa1|29109  
AT5G18920.1 Phypa1|3157  
AT3G52860.1 Phypa1|34142  
AT1G78930.1 Phypa1|25688  
AT2G21710.1 Phypa1|1791  
AT1G67190.1 Phypa1|37986  
AT2G42780.1 Phypa1|34152,Phypa1|34406  
AT2G05170.1 Phypa1|36907  
AT5G15630.1,AT3G02210.1,AT3G29810.1,AT5G60920.1 Phypa1|17680,Phypa1|38836  
AT1G09790.1  
AT3G10116.1  
AT5G60950.1  
Phypa1|26105  
AT5G08535.1,AT3G52350.1 Phypa1|28783  
AT4G12830.1 Phypa1|24317  
Phypa1|23667  
AT5G50310.1 Phypa1|36104  
AT3G27180.1 Phypa1|455  
AT3G21465.1,AT4G15640.1 Phypa1|144,Phypa1|1923  
AT2G32090.1 Phypa1|36722  
AT2G38780.1 Phypa1|24260  
AT3G10970.1 Phypa1|25522  
AT2G32900.1 Phypa1|3374  
AT5G56900.2 Phypa1|36092  
AT3G10530.1 Phypa1|38556  
AT5G19950.1 Phypa1|11210  
AT1G79130.1,AT1G56150.1,AT1G16510.1,AT3G12830.1  
Phypa1|344,Phypa1|1146,Phypa1|1698,Phypa1|787,Phypa1|349,Phypa1|317,Phypa1|1268,Phypa1|333,Phypa1|858  
AT4G38850.1,AT2G21210.1,AT3G03850.1,AT5G66260.1,AT4G34790.1,AT2G18010.1,AT4G36110.1,AT4G34760.1,AT4G34770.1,AT1G75580.1,AT3G20220.1,AT2G46690.1,AT1G19830.1,AT2G21220.1,AT3G03840.1,AT4G34780.1,AT3G03830.1,AT3G61900.1,AT4G34810.1,AT4G34800.1,AT4G38860.1,AT4G13790.1  
AT1G19840.1,AT4G34750.1,AT5G10990.1,AT1G75590.1,AT2G24400.1,AT3G43120.1  
AT5G53590.1,AT2G28085.1,AT4G00880.1,AT4G22620.1,AT4G31320.1  
AT3G53250.1,AT2G37030.1,AT5G03310.1,AT3G51200.1  
AT4G09530.1  
AT3G09870.1  
AT5G50760.1  
AT2G36210.1  
AT1G30500.2,AT2G34720.1 Phypa1|32370,Phypa1|32679  
AT5G06510.1,AT3G05690.1  
AT3G20910.1,AT5G12840.1  
AT1G17590.1,AT1G54160.1,AT3G14020.1,AT1G72830.2

AT2G40780.1 Phypa1|39282  
 AT5G44710.1 Phypa1|860  
 AT5G27680.1 Phypa1|405,Phypa1|16979  
 AT1G64860.1 Phypa1|33950  
 AT1G08540.1 Phypa1|36251,Phypa1|32241,Phypa1|24700,Phypa1|38474  
 AT5G13730.1  
 AT3G53920.1  
 AT2G36990.1  
     Phypa1|22271  
     Phypa1|31121  
 AT1G55370.2 Phypa1|33537  
 AT4G33470.1 Phypa1|27145  
 AT1G56200.1,AT1G30475.1 Phypa1|32255  
 AT4G02560.1 Phypa1|35348  
 AT2G27860.1,AT1G08200.1 Phypa1|3030  
 AT5G38600.1,AT1G67210.1 Phypa1|33149  
 AT5G65780.1,AT3G49680.1 Phypa1|37293,Phypa1|38367  
 AT1G50090.1,AT1G10060.2,AT1G10070.1,AT3G19710.1,AT1G50110.1  
     Phypa1|14704  
     Phypa1|30677  
     Phypa1|28500,Phypa1|25752,Phypa1|26731  
     Phypa1|27654  
 AT5G63000.1 Phypa1|34361  
 AT5G19660.1 Phypa1|32985  
 AT1G67590.1,AT2G02170.1 Phypa1|25754,Phypa1|2676  
 AT1G53860.1  
     Phypa1|3947,Phypa1|4028  
     Phypa1|19566  
     Phypa1|721  
 AT5G23110.1 Phypa1|26973  
 AT2G40170.1 Phypa1|24540  
 AT3G51810.1  
 AT1G43670.1 Phypa1|39672,Phypa1|24368  
 AT3G54050.1 Phypa1|39169,Phypa1|38325  
 AT5G64380.1 Phypa1|31944,Phypa1|27471  
     Phypa1|32334  
     Phypa1|2271  
 AT5G01300.1 Phypa1|1196,Phypa1|27675  
 AT3G16990.1 Phypa1|23944  
 AT2G28820.1,ATCG00790.1 Phypa1|31272  
 AT5G58260.1 Phypa1|25413  
     Phypa1|28179  
 AT1G06790.1 Phypa1|24423  
 AT5G49230.1,AT5G26990.1,AT1G56280.1,AT3G05700.1,AT3G06760.1  
     Phypa1|25737,Phypa1|37743,Phypa1|27671  
 AT4G02200.1  
     Phypa1|1162  
 AT2G31670.1,AT1G51360.1 Phypa1|28781  
 AT2G31740.1 Phypa1|32492,Phypa1|28827  
 AT4G34360.1 Phypa1|36430  
 AT1G61690.1 Phypa1|34550  
 AT5G24300.1 Phypa1|38089,Phypa1|38088  
 AT3G01180.1 Phypa1|38232,Phypa1|39407,Phypa1|36243  
 AT1G32900.1 Phypa1|6187,Phypa1|25691  
 AT1G14620.1 Phypa1|3975  
 AT3G09470.1 Phypa1|36348  
 AT3G48500.1 Phypa1|3756  
 AT5G57700.1 Phypa1|36973  
 AT5G09680.1 Phypa1|234  
 ATCG00710.1 Phypa1|25503  
 AT1G33265.1 Phypa1|33715  
 AT3G54970.1 Phypa1|184  
 AT1G01020.1,AT4G01510.1 Phypa1|649  
 AT2G07360.1 Phypa1|28972  
 AT5G45760.1 Phypa1|38291  
 AT4G20930.1 Phypa1|38372  
 AT5G17170.1 Phypa1|28238  
 AT1G15330.1,AT1G80090.1 Phypa1|26200,Phypa1|23940  
 AT1G68185.1 Phypa1|34448,Phypa1|32443  
 AT4G03030.1 Phypa1|1019  
 AT4G39880.1 Phypa1|36895  
 AT1G42480.1 Phypa1|32812  
 AT1G77320.1 Phypa1|24337  
     Phypa1|16532  
 AT3G05250.1 Phypa1|30338  
 AT4G37020.1 Phypa1|35594  
 AT5G25760.1 Phypa1|34230  
 AT3G24515.1 Phypa1|37949  
 AT1G16890.2,AT1G78870.1 Phypa1|34935,Phypa1|23838  
 AT3G57870.1 Phypa1|37628,Phypa1|24184  
 AT5G50870.1 Phypa1|23718  
 AT2G18600.1 Phypa1|38926,Phypa1|36542,Phypa1|2103,Phypa1|36660,Phypa1|4045

AT3G20060.1,AT1G50490.1 Phypa1|24207  
AT5G05080.1 Phypa1|25572  
AT3G55380.1,AT3G46460.1 Phypa1|24206,Phypa1|35987,Phypa1|34336,Phypa1|36807  
AT1G14400.1,AT2G02760.1 Phypa1|38874,Phypa1|36940  
AT4G27960.2,AT1G64230.1 Phypa1|36742,Phypa1|23769,Phypa1|33199,Phypa1|36739  
AT2G46030.1,AT5G41340.1,AT1G63800.1 Phypa1|23958,Phypa1|32537  
AT4G36800.1  
AT5G59300.1  
AT5G62540.1  
AT5G56150.1  
AT3G08690.1  
AT1G36340.1  
AT5G41700.4  
AT2G32790.1  
AT3G08700.1,AT5G53300.1  
Phypa1|16906  
Phypa1|39777  
AT3G07980.1,AT3G13530.1 Phypa1|27453  
Phypa1|13434,Phypa1|26668  
AT2G17350.1 Phypa1|38927,Phypa1|25062  
AT5G24740.1 Phypa1|17888  
AT3G10150.1 Phypa1|28496  
AT2G17270.1 Phypa1|24593,Phypa1|37234  
AT3G48850.1,AT5G14040.1 Phypa1|24162,Phypa1|3565,Phypa1|38666,Phypa1|24440  
Phypa1|3990  
Phypa1|29269  
Phypa1|29888  
AT2G39950.1 Phypa1|16823  
AT5G43745.1,AT5G02940.1 Phypa1|472  
Phypa1|27432  
AT1G13310.1 Phypa1|24526,Phypa1|33471  
AT2G31190.1 Phypa1|36852  
AT3G57050.1 Phypa1|30944,Phypa1|30938  
AT3G01120.1 Phypa1|26227,Phypa1|28343  
AT1G33320.1  
Phypa1|36772  
Phypa1|30900  
Phypa1|31330,Phypa1|30839  
AT1G73090.1 Phypa1|3966  
AT2G41750.1 Phypa1|674  
AT4G13520.1 Phypa1|35206  
AT2G18160.1,AT3G62420.1,AT1G75390.1,AT4G34590.1 Phypa1|1609  
AT4G37730.1,AT2G22850.1  
AT5G49450.1  
AT2G16860.1 Phypa1|25211  
AT5G51140.1 Phypa1|26298  
AT3G04950.1 Phypa1|31977  
AT5G22875.1 Phypa1|34420  
AT1G56360.1,AT4G36350.1,AT2G27190.1,AT2G16430.2 Phypa1|39409,Phypa1|25694  
AT2G18130.1,AT1G52940.1,AT5G34850.1,AT3G46120.1  
AT5G14950.1 Phypa1|31727  
AT4G33640.1 Phypa1|2226  
AT3G59660.1 Phypa1|27088  
AT3G44380.1 Phypa1|29288,Phypa1|25401,Phypa1|1577  
AT2G26230.1 Phypa1|29000  
AT5G24460.1 Phypa1|2063  
AT5G46560.1 Phypa1|4026  
AT5G42670.1,AT5G52070.1 Phypa1|7800  
AT1G44960.1 Phypa1|29455  
AT5G53330.1 Phypa1|39115  
AT5G15870.1,AT1G18310.1 Phypa1|36121  
AT5G21430.1 Phypa1|33581,Phypa1|31844  
AT4G31720.1 Phypa1|24238  
AT5G18440.1 Phypa1|32946  
AT4G01897.1 Phypa1|24205  
AT1G21600.1 Phypa1|28915  
AT2G30620.1,AT1G06760.1 Phypa1|6232,Phypa1|21853,Phypa1|3744,Phypa1|38454  
AT2G18050.1  
AT1G17270.1,AT5G50420.1,AT1G53770.1 Phypa1|2868  
AT3G13940.1 Phypa1|34797  
AT4G16444.1 Phypa1|7692  
AT3G18760.1 Phypa1|26192  
AT3G10572.1 Phypa1|34613  
AT5G64830.1 Phypa1|28882  
AT3G49640.1 Phypa1|29668,Phypa1|37765  
AT5G58450.1 Phypa1|35743  
AT4G14180.1 Phypa1|12009  
Phypa1|7775  
AT3G16565.1 Phypa1|25920  
AT5G07810.1 Phypa1|27174  
AT3G06400.1,AT5G18620.2 Phypa1|39042,Phypa1|39094  
AT2G18760.1 Phypa1|9602

AT5G63950.1 Phypa1|6943,Phypa1|10850  
 AT3G06010.1,AT5G19310.1 Phypa1|1756  
 AT1G48310.1 Phypa1|23985  
 AT2G13370.1 Phypa1|2,Phypa1|27328  
 AT3G12810.1 Phypa1|1349,Phypa1|26408  
 AT5G66750.1 Phypa1|38690  
 AT1G03750.1 Phypa1|1761  
 AT2G44980.2 Phypa1|24061  
 AT3G57300.1 Phypa1|32744  
 AT3G19210.1 Phypa1|29297,Phypa1|30189  
 AT3G54280.1 Phypa1|36794  
 AT2G46020.2 Phypa1|32176,Phypa1|14640  
 AT4G31900.1,AT2G25170.1 Phypa1|25704,Phypa1|29282  
 AT5G44800.1,AT2G02090.1,AT1G08600.1  
 Phypa1|26202,Phypa1|22227,Phypa1|20890,Phypa1|893,Phypa1|921,Phypa1|21376,Phypa1|35472,Phyp  
 a1|29689,Phypa1|17644,Phypa1|18796,Phypa1|29170,Phypa1|29509,Phypa1|29474,Phypa1|35562,Phypa1|34295  
 Phypa1|14146  
 Phypa1|7652  
 Phypa1|4260  
 Phypa1|29863  
 Phypa1|5951  
 AT3G11320.1,AT5G05820.1 Phypa1|38808,Phypa1|39574  
 AT1G77610.1,AT1G21870.1 Phypa1|38660,Phypa1|24662  
 AT1G12500.1  
 AT5G04160.1,AT3G10290.1  
 AT3G01380.1 Phypa1|26740  
 AT1G12800.1 Phypa1|26669,Phypa1|33981  
 AT1G79790.1 Phypa1|26896  
 AT4G24520.1,AT4G30210.1 Phypa1|38154,Phypa1|25739,Phypa1|39032,Phypa1|29519  
 AT3G02280.1 Phypa1|36922  
 AT3G24710.1  
 Phypa1|30000  
 AT3G17930.1 Phypa1|25368  
 AT5G59500.1 Phypa1|37082  
 AT4G19985.1 Phypa1|10183  
 AT4G04190.1 Phypa1|26378  
 AT1G10830.1 Phypa1|29679,Phypa1|26518  
 AT3G26730.1 Phypa1|31719  
 AT3G18270.1 Phypa1|36808  
 AT4G28510.1,AT1G03860.1,AT2G20530.1 Phypa1|36072,Phypa1|34756,Phypa1|36425  
 AT3G27280.1,AT5G40770.1 Phypa1|24106,Phypa1|23737,Phypa1|39586  
 AT5G44140.1  
 AT5G14300.1  
 Phypa1|718  
 Phypa1|30693  
 AT2G02500.1 Phypa1|29030,Phypa1|38867  
 AT2G22260.1 Phypa1|28741  
 AT1G44414.1 Phypa1|37446  
 AT3G27730.1 Phypa1|26013  
 AT5G61140.1 Phypa1|27135  
 AT2G42270.1,AT1G20960.1 Phypa1|38397  
 AT5G57880.1 Phypa1|7741  
 AT2G26780.1 Phypa1|36179  
 AT3G52260.2 Phypa1|30141  
 AT2G40316.1 Phypa1|32095,Phypa1|25980  
 AT4G04930.1 Phypa1|2634  
 AT1G27150.1,AT1G27110.1 Phypa1|37458  
 AT2G26210.1 Phypa1|38315  
 AT4G25610.1 Phypa1|8506  
 AT4G38320.1,AT4G37680.1 Phypa1|3066,Phypa1|15171  
 AT5G20270.1  
 Phypa1|36275,Phypa1|39445  
 Phypa1|37854  
 AT1G62730.1 Phypa1|23924  
 AT4G33480.1 Phypa1|28884  
 AT2G14260.1 Phypa1|38999  
 AT4G08870.1,AT4G08900.1 Phypa1|36773  
 AT1G08960.1 Phypa1|1822  
 AT1G54115.1,AT3G14070.1 Phypa1|1805,Phypa1|24339  
 AT5G17850.1,AT5G17860.1  
 AT4G13200.1 Phypa1|33448  
 AT5G08720.1 Phypa1|30332  
 AT5G47400.1 Phypa1|30963  
 AT4G23890.1 Phypa1|37158  
 AT3G13200.1 Phypa1|15087  
 AT3G55940.1,AT5G58670.1,AT5G58690.1,AT2G40116.1,AT4G38530.1,AT3G08510.1,AT5G58700.1  
 Phypa1|39083,Phypa1|1381,Phypa1|27508  
 AT3G47290.1,AT3G47220.1  
 Phypa1|27197,Phypa1|38235,Phypa1|30714,Phypa1|39330  
 AT5G24340.1 Phypa1|37269  
 AT5G48830.1 Phypa1|31990  
 AT1G10520.1 Phypa1|37593



AT4G25730.1 Phypa1|23727  
 AT3G26710.1 Phypa1|27113  
 AT1G14990.1 Phypa1|38947  
 AT1G61740.1,AT4G21250.1,AT1G11540.1 Phypa1|30549,Phypa1|26406,Phypa1|537  
 AT2G36630.1,AT2G25737.1  
 AT4G21260.1  
 AT2G45520.1 Phypa1|12939  
 AT5G12920.1 Phypa1|35185  
 AT3G07060.1 Phypa1|3348,Phypa1|16938  
 AT2G04360.1 Phypa1|180  
 AT2G39450.1 Phypa1|2815,Phypa1|24889,Phypa1|36899  
 AT3G58060.1 Phypa1|27583  
 AT1G16310.1,AT1G79520.1  
 Phypa1|8785  
 AT5G16690.1 Phypa1|16024  
 AT1G08710.1 Phypa1|3739,Phypa1|3737  
 AT5G51040.1 Phypa1|24559  
 AT2G36810.1 Phypa1|33935,Phypa1|18414  
 AT1G64350.1 Phypa1|29232  
 AT1G35420.1 Phypa1|16284  
 Phypa1|25656  
 AT2G38680.1 Phypa1|38652  
 AT2G28100.1 Phypa1|38625  
 AT5G48930.1 Phypa1|23725  
 AT3G48720.1,AT5G63560.1,AT5G41040.1 Phypa1|28317  
 AT2G19070.1,AT5G57840.1  
 AT3G03480.1,AT5G17540.1  
 AT3G62160.1,AT1G27620.1,AT2G23510.1,AT1G28680.1,AT1G03390.1,AT2G40230.1,AT3G47170.1  
 AT4G31910.1  
 Phypa1|37836,Phypa1|1427,Phypa1|37803  
 Phypa1|38130,Phypa1|36102  
 Phypa1|26386,Phypa1|1433  
 Phypa1|1423  
 Phypa1|25146  
 Phypa1|1424  
 Phypa1|24555  
 AT3G12600.1 Phypa1|36903,Phypa1|38814  
 AT2G01670.1,AT1G14860.1,AT1G18300.1,AT1G73540.1  
 AT1G12880.1,AT3G26690.1  
 AT1G35660.1 Phypa1|39539  
 AT1G26470.1 Phypa1|25758  
 AT3G05100.1 Phypa1|27278  
 AT4G22720.1 Phypa1|39033  
 AT3G26085.1 Phypa1|24078  
 AT4G21140.1,AT4G05400.1 Phypa1|2029  
 AT5G05990.1,AT3G55605.1,AT2G39790.1,AT2G39795.1,AT5G02050.1 Phypa1|24190  
 AT4G31930.1,AT1G15870.1,AT1G80720.1  
 Phypa1|33033  
 AT5G16630.1 Phypa1|24909  
 AT4G35910.1 Phypa1|25728  
 AT3G12930.1 Phypa1|29060  
 AT5G16260.1 Phypa1|2256  
 AT5G39320.1,AT3G29360.1,AT5G15490.1 Phypa1|38593,Phypa1|39603,Phypa1|39645,Phypa1|39088  
 AT3G01010.1  
 AT1G26570.1  
 Phypa1|20623,Phypa1|22912  
 AT3G17740.1 Phypa1|33569  
 AT2G20725.1 Phypa1|26889  
 AT4G14870.1 Phypa1|25301  
 AT3G51790.1 Phypa1|32447  
 AT2G47760.1 Phypa1|492  
 AT4G33690.1 Phypa1|38717  
 AT3G25805.1 Phypa1|38968  
 AT1G65000.1 Phypa1|24148  
 AT5G54960.1,AT4G33070.1,AT5G01330.1,AT5G01320.1 Phypa1|36642,Phypa1|25419  
 Phypa1|28596,Phypa1|3018  
 Phypa1|28478  
 AT2G43250.1 Phypa1|24602  
 AT1G07130.1 Phypa1|26136  
 AT1G73177.1 Phypa1|11382  
 AT4G18372.1 Phypa1|1314  
 AT5G48520.1 Phypa1|36002  
 AT3G57570.1 Phypa1|33767  
 AT5G45170.1 Phypa1|27365  
 AT1G75090.1,AT3G12710.1,AT5G57970.1,AT1G80850.1,AT1G13635.1,AT1G15970.1  
 Phypa1|1148,Phypa1|245  
 AT5G44680.1  
 AT4G02790.1 Phypa1|564  
 Phypa1|31146  
 AT1G07745.1 Phypa1|28130  
 AT5G52960.1 Phypa1|29102  
 AT5G41580.1 Phypa1|34755

AT1G08910.1  
 AT1G06820.1 Phypa1|14983,Phypa1|37618  
 ATCG00800.1 Phypa1|31271  
 AT5G62840.1 Phypa1|28833  
 AT2G34570.1 Phypa1|38345  
 AT1G47640.1 Phypa1|23957  
 AT1G44770.1 Phypa1|4415  
 AT1G65700.1 Phypa1|34175  
 AT4G02425.1 Phypa1|35119  
 AT3G26950.1 Phypa1|38401,Phypa1|28049  
 AT3G46200.1 Phypa1|25618  
 AT4G31150.1 Phypa1|27714  
 AT5G58920.1 Phypa1|37793  
 AT2G36895.1 Phypa1|25029  
 AT3G61350.1 Phypa1|28105,Phypa1|37165  
 AT1G16250.1 Phypa1|34837,Phypa1|31957  
 AT1G55270.1 Phypa1|38205  
 AT1G30090.1  
 Phypa1|32640,Phypa1|33077  
 Phypa1|6519  
 AT2G32415.1 Phypa1|899  
 AT3G21350.1 Phypa1|2053  
 AT5G14710.1 Phypa1|39157  
 AT4G16060.1 Phypa1|30398  
 AT2G43190.1 Phypa1|30076  
 AT1G19530.1 Phypa1|34949,Phypa1|23981  
 AT4G21770.1 Phypa1|29540  
 AT3G19220.1 Phypa1|18869,Phypa1|34852  
 AT5G57610.1 Phypa1|28035,Phypa1|23844  
 AT1G16270.1,AT2G35050.1,AT1G79570.1,AT3G24720.1  
 AT1G04700.1  
 AT3G46920.1  
 AT3G20720.1 Phypa1|29387  
 Phypa1|10779  
 AT1G25375.1 Phypa1|29449  
 AT5G61850.1 Phypa1|32902,Phypa1|33349  
 AT1G19140.2 Phypa1|2293  
 AT1G33410.1 Phypa1|35431  
 AT5G24930.1,AT2G24790.1 Phypa1|36979,Phypa1|39652,Phypa1|39643  
 AT3G02380.1,AT5G15840.1,AT5G15850.1,AT5G57660.1  
 AT1G72090.1 Phypa1|34  
 AT5G55060.1 Phypa1|33329,Phypa1|34291  
 AT5G57860.1 Phypa1|37452  
 ATMG00270.1 Phypa1|3023  
 AT5G06830.1 Phypa1|37975  
 AT3G63010.1,AT5G27320.1,AT3G05120.1 Phypa1|25679,Phypa1|25406,Phypa1|25881,Phypa1|27293  
 AT2G45600.1,AT2G45610.1,AT5G23530.1,AT5G62180.1 Phypa1|29821  
 AT1G68620.1,AT5G16080.1,AT5G06570.1  
 AT1G47480.1,AT1G49660.1  
 AT1G49650.1,AT1G19190.1,AT3G48690.1,AT3G48700.1,AT1G49640.1,AT2G03550.1  
 Phypa1|2294  
 Phypa1|31191,Phypa1|30048  
 Phypa1|1560  
 AT3G16510.1,AT4G15755.1,AT1G09070.1 Phypa1|35578,Phypa1|32431,Phypa1|19718  
 AT4G15740.1  
 AT5G54080.1 Phypa1|14018  
 AT1G48550.1 Phypa1|36400,Phypa1|38340  
 AT1G04650.1 Phypa1|10649  
 AT3G63390.1 Phypa1|1201,Phypa1|34415  
 AT3G56650.1 Phypa1|15903  
 AT4G13140.1 Phypa1|27496  
 AT4G00990.1 Phypa1|38109,Phypa1|34081  
 AT1G62310.1  
 AT3G07610.1  
 AT3G63290.1 Phypa1|24926,Phypa1|24913  
 AT4G01900.1 Phypa1|36066  
 AT4G14590.1 Phypa1|2068  
 AT5G52950.1 Phypa1|33751  
 AT1G18700.2 Phypa1|27439  
 AT1G67800.2,AT5G14420.1,AT3G01650.1 Phypa1|38074,Phypa1|36282,Phypa1|30631  
 AT1G79380.1  
 AT5G63970.1  
 Phypa1|1864  
 AT1G08480.1 Phypa1|32769,Phypa1|24256  
 AT1G29850.2 Phypa1|25732  
 AT4G17540.1 Phypa1|34744  
 AT1G16870.1 Phypa1|25630  
 AT5G43050.1 Phypa1|1215  
 AT5G42470.1 Phypa1|37528  
 AT1G10030.1 Phypa1|24135  
 AT2G31490.1 Phypa1|2862,Phypa1|24251  
 AT1G49510.1 Phypa1|25124,Phypa1|4455

AT3G62370.1 Phypa1|1025,Phypa1|27449  
 AT3G62810.1 Phypa1|38361  
 AT4G21530.1 Phypa1|34347  
 AT1G79350.1 Phypa1|2490  
 Phypa1|3370  
 AT5G13830.1 Phypa1|2770  
 AT3G53470.2 Phypa1|32634  
 AT1G16040.1 Phypa1|33802  
 AT5G13050.1 Phypa1|26418,Phypa1|27809  
 AT2G36145.1 Phypa1|2120  
 AT2G02410.1 Phypa1|600,Phypa1|25396  
 AT5G52290.1 Phypa1|14659  
 AT1G79390.1 Phypa1|29665  
 AT4G16450.1 Phypa1|37122  
 AT3G15110.1 Phypa1|37159  
 AT5G13690.1 Phypa1|39597  
 AT2G04690.1 Phypa1|27667  
 AT2G04340.1 Phypa1|39590  
 AT1G80420.1 Phypa1|17046  
 Phypa1|10866  
 AT3G10700.1 Phypa1|34194  
 Phypa1|28396  
 AT3G08840.2 Phypa1|24142  
 AT5G06410.1 Phypa1|38059  
 AT5G43500.1 Phypa1|25415  
 AT2G05120.1 Phypa1|28052  
 AT5G52980.1 Phypa1|24503  
 AT5G19130.1 Phypa1|36052  
 AT2G26610.1,AT3G33530.1 Phypa1|37254,Phypa1|895  
 AT5G51960.1 Phypa1|33344  
 AT5G43210.1 Phypa1|34874  
 AT1G28150.1 Phypa1|35241  
 AT2G20980.1 Phypa1|36717  
 AT1G77540.1,AT1G21770.1 Phypa1|859  
 AT5G23230.1,AT5G23220.1 Phypa1|27295  
 AT1G59600.1 Phypa1|27969  
 AT2G04790.2 Phypa1|790  
 AT4G06676.1 Phypa1|27560  
 AT3G29280.1 Phypa1|732  
 AT5G42370.1 Phypa1|26628  
 AT3G02860.2 Phypa1|33006  
 AT5G08320.1 Phypa1|25860  
 AT5G20150.1,AT2G26660.1 Phypa1|38196,Phypa1|25205,Phypa1|24848  
 AT2G45130.1  
 AT5G15330.1  
 Phypa1|24724,Phypa1|36990,Phypa1|36255  
 AT5G37480.1 Phypa1|25585,Phypa1|4624  
 AT2G01460.1 Phypa1|30146  
 AT4G37925.1 Phypa1|34875  
 AT4G22000.1 Phypa1|39538  
 AT2G39170.1 Phypa1|35319  
 AT3G51610.1 Phypa1|39712  
 AT1G65680.1,AT4G28250.1,AT2G45110.1,AT2G20750.1  
 Phypa1|34111,Phypa1|29437,Phypa1|678,Phypa1|19231,Phypa1|29937,Phypa1|24736  
 AT1G69530.3,AT2G40610.1,AT2G39700.1,AT5G05290.1,AT5G56320.1,AT1G26770.1,AT2G03090.1,AT3G55500.1,AT3G29030.1,AT2G28950.1,AT5G02260.1,AT2G37640.1 Phypa1|8573  
 AT3G60570.1  
 AT4G17030.1  
 AT5G39290.1,AT5G39270.1,AT5G39310.1,AT5G39300.1,AT5G39280.1  
 AT1G62980.1,AT1G12560.1  
 AT1G20190.1  
 AT3G03220.1  
 Phypa1|27392  
 Phypa1|37761,Phypa1|29565,Phypa1|29162,Phypa1|25792,Phypa1|37772,Phypa1|15910,Phypa1|25692,  
 Phypa1|11537,Phypa1|34514,Phypa1|23765  
 Phypa1|26217,Phypa1|28804,Phypa1|26928,Phypa1|23741,Phypa1|25741,Phypa1|26926,Phypa1|1535,P  
 hypa1|38583,Phypa1|30286,Phypa1|39754,Phypa1|30288,Phypa1|8185,Phypa1|219,Phypa1|21471,Phypa1|26917,P  
 hypa1|11585,Phypa1|26211,Phypa1|38456  
 Phypa1|37477,Phypa1|23693  
 Phypa1|25677  
 Phypa1|39592  
 AT4G27750.1 Phypa1|33293  
 AT2G25730.1 Phypa1|37068  
 AT1G35340.1 Phypa1|25222  
 AT5G51545.1 Phypa1|4020  
 AT5G43680.1 Phypa1|33273  
 AT5G37055.1 Phypa1|36058  
 AT3G25150.1,AT5G60980.2 Phypa1|31665,Phypa1|4008,Phypa1|38301,Phypa1|4005  
 AT5G48650.1  
 AT3G55540.1,AT1G69250.1  
 AT3G07250.1,AT1G13730.1  
 AT5G43960.1

AT2G03640.2  
     Phypa1|31666  
 AT3G16200.1      Phypa1|26655  
 AT3G59650.1      Phypa1|32707  
 AT4G32930.1      Phypa1|38684  
 AT5G52110.1      Phypa1|37389  
 AT4G02485.1      Phypa1|1143  
 AT1G21840.1      Phypa1|34518  
 AT4G14310.2      Phypa1|33553  
 AT2G35260.1,AT4G17840.1      Phypa1|27849,Phypa1|569  
 AT5G67060.1,AT5G09750.1,AT3G50330.1  
     Phypa1|2080,Phypa1|32977,Phypa1|33666,Phypa1|32831,Phypa1|34264,Phypa1|18369  
 AT3G21330.1,AT4G00120.1  
 AT5G02130.1      Phypa1|11639  
 AT2G36835.1      Phypa1|38048  
 AT4G04320.1      Phypa1|25912  
 AT4G32050.1      Phypa1|16909,Phypa1|33580  
 AT2G40570.1      Phypa1|26071  
 AT1G80940.1      Phypa1|32858,Phypa1|24543  
 AT1G48140.1      Phypa1|17878,Phypa1|35886  
 AT3G20780.1      Phypa1|29374  
 AT1G22130.1,AT1G77980.1,AT1G77950.1  
     Phypa1|24157,Phypa1|33857,Phypa1|36930,Phypa1|23683,Phypa1|26405,Phypa1|14875,Phypa1|38193,  
 Phypa1|29641,Phypa1|36341,Phypa1|6981,Phypa1|37412,Phypa1|29943  
 AT2G03060.1,AT1G69540.1,AT1G18750.1  
     Phypa1|29942  
 AT5G23395.1      Phypa1|10586  
 AT5G52190.1      Phypa1|26350  
     Phypa1|29938  
 AT3G01800.1      Phypa1|27502  
 AT4G01710.1      Phypa1|23869  
 AT5G08060.1      Phypa1|1253  
 AT5G50850.1      Phypa1|39649,Phypa1|39180  
 AT1G30120.1,AT2G34590.1      Phypa1|23896,Phypa1|28074  
 AT1G55510.1,AT3G13450.1      Phypa1|28338  
     Phypa1|19372  
     Phypa1|30020,Phypa1|30901,Phypa1|31229  
 AT2G20390.1      Phypa1|32021  
 AT3G25545.1      Phypa1|28499  
 AT5G09270.1      Phypa1|24757  
 AT3G52940.1      Phypa1|4932  
 AT2G25100.1      Phypa1|32911  
 AT5G20170.1      Phypa1|19661  
 AT2G39900.1,AT2G45800.1,AT3G55770.1      Phypa1|26639,Phypa1|39095,Phypa1|10560  
 AT3G61230.1,AT1G01780.1,AT1G10200.1  
 AT1G27530.1      Phypa1|37739  
 AT1G80860.1      Phypa1|26964  
 AT2G45690.1      Phypa1|24804  
 AT5G21070.1      Phypa1|37830  
 AT1G26090.1      Phypa1|35126  
 AT3G09050.1      Phypa1|27341  
 AT5G58200.1      Phypa1|29476  
 AT5G66930.2      Phypa1|29256  
 AT5G50720.1,AT4G24960.1  
     Phypa1|24068,Phypa1|36649,Phypa1|35733,Phypa1|39707,Phypa1|6007,Phypa1|39565  
 AT5G62490.1,AT2G42820.1,AT1G74520.1,AT1G69700.1  
 AT5G66090.1      Phypa1|29132  
 AT5G60590.2      Phypa1|25525  
 AT5G13680.1      Phypa1|38487  
 AT5G51510.1      Phypa1|34203  
 AT3G26750.1      Phypa1|31659  
 AT3G22990.1      Phypa1|23995,Phypa1|38865  
 AT2G44760.1      Phypa1|32663  
 AT2G37560.1      Phypa1|24490  
 AT3G04020.1      Phypa1|30411  
 AT1G16650.1      Phypa1|28315,Phypa1|29482  
 AT4G04880.1      Phypa1|37732  
 AT4G29890.1      Phypa1|24617  
     Phypa1|31093  
 AT3G09150.2      Phypa1|24592  
 AT3G12210.2      Phypa1|37752  
 AT3G56290.1      Phypa1|2148  
 AT5G17280.1      Phypa1|8520  
 AT3G44720.1,AT5G22630.1,AT2G27820.1,AT1G08250.1  
     Phypa1|25242,Phypa1|27119,Phypa1|25155,Phypa1|26733  
 AT3G07630.1  
 AT1G11790.1  
 AT1G32730.1      Phypa1|33498  
 AT1G21790.1      Phypa1|39630  
 AT2G18410.1      Phypa1|35277  
 AT1G65270.1      Phypa1|32806  
 AT4G04614.1      Phypa1|1595

AT1G31780.1 Phypa1|23931  
AT4G12290.1,AT3G43670.1,AT1G62810.1 Phypa1|37352  
AT1G31710.1,AT1G31690.1,AT1G31670.1,AT4G14940.1  
AT1G31680.1  
AT4G12280.1  
AT4G12270.1  
AT1G09010.1 Phypa1|27734,Phypa1|27448  
AT5G55610.1 Phypa1|14183  
AT2G39725.1 Phypa1|28219  
AT3G52210.3 Phypa1|30553  
AT1G13330.1 Phypa1|30157  
AT2G34585.1 Phypa1|2237  
Phypa1|6754  
AT2G24970.1 Phypa1|799  
AT3G05930.1,AT3G62020.1,AT5G26700.1,AT1G09560.1,AT1G18980.1,AT1G18970.1  
Phypa1|9716,Phypa1|24243,Phypa1|33252,Phypa1|2433,Phypa1|38332,Phypa1|33250  
AT5G39160.1,AT5G39110.1,AT5G39100.1,AT5G39150.1,AT5G39190.1,AT3G05950.1,AT5G38930.1,AT3G04150.1,A  
T5G38910.1,AT5G39180.1,AT5G39120.1,AT5G38940.1,AT3G04200.1,AT3G04180.1,AT3G04170.1,AT4G14630.1,AT  
3G04190.1,AT5G39130.1,AT5G38960.1  
AT5G20630.1,AT1G72610.1  
AT1G10460.1  
AT5G38950.1  
AT1G74820.1  
AT3G10080.1  
Phypa1|36402,Phypa1|34674,Phypa1|2451,Phypa1|34189  
Phypa1|27065,Phypa1|33449,Phypa1|334,Phypa1|16636  
Phypa1|21570  
Phypa1|33512  
Phypa1|2594  
Phypa1|30166  
AT3G12270.1 Phypa1|2817  
AT1G04870.2 Phypa1|27913,Phypa1|2739  
AT4G29510.1,AT2G19670.1 Phypa1|2664,Phypa1|2597  
AT3G20020.1 Phypa1|37400  
Phypa1|6325  
AT5G22130.1 Phypa1|28599  
AT4G33140.1 Phypa1|28374  
AT1G67550.1 Phypa1|39497  
AT4G22550.1 Phypa1|35094,Phypa1|7417  
AT3G27930.1 Phypa1|26261  
AT3G15420.1 Phypa1|4995  
AT3G21400.1 Phypa1|28605  
AT4G24970.1 Phypa1|901,Phypa1|422,Phypa1|25201,Phypa1|19  
AT4G36280.1,AT4G36270.1,AT4G36290.1 Phypa1|36575  
AT5G50780.1  
AT5G13130.1  
AT1G19100.1  
Phypa1|419,Phypa1|913  
AT5G03455.1 Phypa1|25298  
AT5G03860.1 Phypa1|25996  
AT2G42510.1,AT1G54380.1 Phypa1|31942  
AT4G12230.1 Phypa1|1012  
AT5G65250.1 Phypa1|32378  
AT2G47910.1 Phypa1|28490  
AT4G17486.1,AT5G47310.1 Phypa1|2107,Phypa1|38540  
AT2G25190.1,AT5G25170.1,AT1G47740.1,AT1G80690.1  
AT3G20680.1 Phypa1|32279  
AT1G79190.1 Phypa1|11316  
AT1G75980.1 Phypa1|685  
AT5G27710.1 Phypa1|37843  
AT1G28530.1 Phypa1|33260  
AT3G03210.1 Phypa1|37504  
AT4G17430.1 Phypa1|1830  
AT5G55240.1,AT2G33380.1,AT5G29560.1,AT4G26740.1 Phypa1|26447,Phypa1|29019,Phypa1|26960  
AT4G13330.1 Phypa1|33230  
AT1G70680.1,AT1G70670.1,AT1G23240.1  
AT1G23250.1  
AT4G19003.1 Phypa1|37621  
AT4G26980.1 Phypa1|27244  
AT2G20515.1 Phypa1|25632  
AT3G15180.1 Phypa1|1846  
AT2G33585.1 Phypa1|32553  
AT2G34050.1 Phypa1|2048  
AT3G13882.1 Phypa1|33721  
AT1G60500.1,AT1G60530.1,AT1G60540.1  
Phypa1|14427,Phypa1|454,Phypa1|1789,Phypa1|1786,Phypa1|1787,Phypa1|1788,Phypa1|14428  
Phypa1|23115  
AT1G24350.1,AT1G67600.1 Phypa1|2479  
AT3G12685.1 Phypa1|29869,Phypa1|26551  
AT3G61770.1 Phypa1|26754,Phypa1|26718  
AT3G21610.1  
AT4G37470.1 Phypa1|38855,Phypa1|3017,Phypa1|38976,Phypa1|37350,Phypa1|39006

AT3G03990.1  
AT3G24420.1  
Phypa1|32694,Phypa1|36797,Phypa1|11258,Phypa1|2748  
Phypa1|39534,Phypa1|28772  
Phypa1|16265  
Phypa1|24681  
AT5G41070.1,AT3G26932.1,AT2G28380.1 Phypa1|39228,Phypa1|1506,Phypa1|1507  
AT3G62800.1  
AT1G61250.1,AT1G03550.1,AT1G11180.1,AT2G20840.1  
Phypa1|36623,Phypa1|36524,Phypa1|37882,Phypa1|29481,Phypa1|36292  
AT1G32050.1  
AT4G19185.1,AT3G45870.1,AT5G45370.2 Phypa1|39551,Phypa1|38883  
AT1G75500.1,AT3G53210.1,AT3G18200.1 Phypa1|25991,Phypa1|1938,Phypa1|29797,Phypa1|36312  
AT4G08300.1,AT1G44800.1,AT5G07050.1,AT1G01070.1  
AT5G40210.1,AT1G11460.1,AT5G40240.1,AT4G01430.1,AT3G28050.1  
AT4G28040.1,AT1G21890.1,AT1G43650.1,AT2G37460.1,AT5G13670.1,AT5G64700.1,AT4G08290.1,AT2G40900.1,A  
T2G39510.1,AT1G09380.1,AT4G30420.1,AT3G56620.1  
AT4G24980.1  
AT3G30340.1,AT5G40230.1,AT1G11450.1,AT1G68170.1,AT4G01450.2,AT4G01440.1  
AT3G28100.1,AT3G28070.1,AT3G28080.1  
AT5G47470.1,AT4G16620.1  
Phypa1|37794  
Phypa1|37860  
AT4G01240.1,AT3G05390.1 Phypa1|37680,Phypa1|24964,Phypa1|26178  
Phypa1|36960  
AT5G06970.1 Phypa1|30556  
AT2G20010.1,AT2G25800.1 Phypa1|27098,Phypa1|39150,Phypa1|30300  
AT4G11670.1  
AT1G04470.1,AT2G33420.1  
AT2G43710.1,AT3G02630.1,AT5G16240.1 Phypa1|14597,Phypa1|24246,Phypa1|37323,Phypa1|15562  
AT3G02620.1,AT5G16230.1,AT3G02610.1  
AT1G43800.1  
Phypa1|21102,Phypa1|30542,Phypa1|13543  
AT1G02260.1 Phypa1|28382  
Phypa1|36596,Phypa1|37370  
Phypa1|21187  
AT5G56760.1 Phypa1|2928,Phypa1|29154,Phypa1|3044  
AT2G17640.1,AT4G35640.1 Phypa1|573  
AT3G13110.1,AT1G55920.1  
Phypa1|19694  
AT1G53670.1 Phypa1|29976  
AT4G21860.1 Phypa1|39130,Phypa1|2980  
AT4G21850.1,AT4G04840.1,AT4G21830.1,AT4G21840.1  
AT4G04830.1,AT4G04810.1,AT4G04800.1  
AT1G04560.1  
Phypa1|31770,Phypa1|37865,Phypa1|30313,Phypa1|11431,Phypa1|37135,Phypa1|27173,Phypa1|33708,  
Phypa1|23701,Phypa1|35935  
AT1G29520.1,AT5G18970.1,AT5G46530.1  
Phypa1|21104,Phypa1|35232  
AT5G65760.1 Phypa1|37580  
AT2G24280.1  
AT3G28680.1,AT5G22860.1  
AT1G55310.2,AT3G13570.1 Phypa1|28742,Phypa1|34315,Phypa1|24050  
AT5G18810.1  
AT3G55460.1  
Phypa1|15079  
AT1G09160.1,AT1G68410.1 Phypa1|25548  
AT1G47380.1  
Phypa1|24434,Phypa1|29860,Phypa1|25926,Phypa1|24865  
Phypa1|26319,Phypa1|24305  
AT2G01860.1 Phypa1|29865  
AT5G55860.1,AT1G45545.1,AT3G13190.1,AT2G26570.1,AT5G42880.1,AT4G33390.1,AT1G12150.1,AT4G17210.1  
Phypa1|32409,Phypa1|11049,Phypa1|18692,Phypa1|20739  
Phypa1|17953  
AT1G74880.1 Phypa1|34873  
AT5G47690.1 Phypa1|29344,Phypa1|25658  
AT1G77600.1  
Phypa1|4369  
AT1G36310.1 Phypa1|23904  
AT2G26810.1 Phypa1|24306  
AT2G44360.1 Phypa1|33195  
AT4G32960.1,AT4G32970.1 Phypa1|36558  
AT3G60240.1 Phypa1|27377,Phypa1|36972  
AT2G24050.1,AT5G57870.1 Phypa1|1770,Phypa1|36698,Phypa1|919,Phypa1|918,Phypa1|421  
AT4G30680.1  
AT1G62410.1  
AT3G21870.1 Phypa1|247,Phypa1|1156,Phypa1|729,Phypa1|2088,Phypa1|240  
AT3G63120.1,AT2G44740.1  
AT3G05327.1  
AT5G61650.1,AT5G07450.1  
AT2G45080.1,AT3G60550.1  
AT1G61000.1 Phypa1|33633

AT5G27300.1,AT2G27790.1 Phypa1|25100  
AT4G35800.1 Phypa1|36234,Phypa1|21431  
AT3G57660.1 Phypa1|35473  
AT5G60040.1  
Phypa1|17772  
AT4G32250.1 Phypa1|36  
AT2G01755.1 Phypa1|2342  
AT4G13650.1,AT5G09950.1,AT4G19220.1 Phypa1|39505,Phypa1|28488,Phypa1|37440  
AT1G29710.1,AT3G15130.1,AT3G61170.1,AT1G23450.1,AT5G39350.1,AT3G11460.1,AT1G15510.1,AT4G25270.1,AT  
3G26780.1,AT3G16610.1,AT1G17630.1,AT3G22690.1,AT5G03800.1,AT3G13770.1,AT3G63370.1,AT2G29760.1,AT2  
G27610.1,AT3G57430.1,AT3G49170.1,AT4G20770.1,AT5G13270.1,AT3G08820.1,AT3G04750.1,AT3G53360.1,AT4G  
30700.1,AT4G35130.1,AT4G32450.1,AT4G14850.1,AT1G19720.1,AT1G56570.1,AT5G13230.1,AT3G01580.1,AT5G6  
5570.1,AT1G77170.1,AT1G22830.1,AT2G34370.1  
Phypa1|30707,Phypa1|31016,Phypa1|36509,Phypa1|37499,Phypa1|36063,Phypa1|38722,Phypa1|37512,  
Phypa1|36233  
AT2G01510.1,AT4G33990.1,AT1G06145.1,AT2G36730.1,AT5G04780.1,AT3G22150.1,AT5G44230.1,AT3G50420.1,A  
T3G26540.1,AT5G52630.1,AT1G74630.1,AT5G55740.1,AT1G34160.1,AT3G24000.1,AT2G39620.1,AT5G27110.1,AT  
2G33760.1,AT1G18485.1,AT3G18970.1,AT3G20730.1,AT1G69350.1,AT2G03380.1,AT5G39680.1,AT1G11290.1,AT3  
G28660.1,AT1G50270.1,AT5G40405.1,AT1G26900.1,AT3G05340.1,AT3G03580.1,AT1G13410.1  
AT2G04860.1,AT4G39530.1,AT5G19020.1,AT1G16480.1,AT2G35030.1,AT4G04370.1  
AT4G08210.1,AT1G08070.1,AT3G02330.1,AT2G03880.1  
AT2G17210.1,AT2G13600.1,AT2G46050.1,AT3G25970.1,AT5G47460.1,AT2G37320.1,AT3G47840.1,AT3G49740.1,A  
T3G09040.1,AT4G21300.1,AT3G58590.1,AT1G53600.1,AT4G02750.1,AT3G05240.1  
AT5G52850.1,AT2G36980.1,AT1G74600.1,AT4G39952.1,AT3G02010.1,AT4G38010.1,AT4G18520.1  
AT1G32415.1,AT1G09410.1,AT4G33170.1  
AT5G08310.1  
AT3G28640.1  
AT3G26630.1,AT4G22760.1,AT1G31920.1,AT1G64310.1,AT5G16860.1,AT3G14730.1,AT2G20540.1,AT4G16470.1,A  
T5G66500.1,AT3G29230.1,AT3G49140.1,AT3G14330.1,AT5G50990.1,AT2G44880.1,AT2G02980.1,AT5G61800.1,AT  
1G04840.1,AT4G31070.1,AT3G51320.1,AT2G22070.1,AT5G56310.1,AT1G05750.1,AT3G15930.1,AT4G14170.1,AT3  
G47530.1,AT2G37310.1,AT3G46790.1,AT2G42920.1,AT3G12770.1,AT5G08510.1,AT1G74400.1,AT2G25580.1,AT5G  
59200.1,AT3G56550.1,AT3G25060.1,AT2G45350.1,AT3G23330.1,AT1G20230.1,AT5G46460.1,AT5G42450.1,AT4G1  
4820.1,AT5G48910.1,AT2G22410.1,AT4G37380.1,AT4G15720.1,AT2G02750.1,AT3G49710.1,AT1G25360.1,AT1G71  
490.1,AT1G09220.1,AT4G32430.1,AT5G06540.1,AT1G59720.1,AT1G33350.1,AT5G66520.1,AT4G14050.1  
AT5G37570.1,AT2G21090.1,AT2G40720.1,AT1G03540.1,AT5G15300.1,AT4G18750.1,AT1G14470.1,AT3G62890.1,A  
T1G71420.1  
AT1G77010.1,AT1G68930.1,AT5G08490.1,AT1G56690.1,AT1G62260.1,AT3G13880.1,AT3G18840.1,AT3G21470.1,A  
T1G71460.1,AT2G41080.1,AT1G10330.1,AT5G50390.1,AT1G43980.1  
AT4G16835.1,AT2G15690.1,AT4G01030.1  
AT1G28690.1  
AT2G33680.1  
AT1G77150.1,AT5G40410.1  
AT4G37170.1  
Phypa1|27539,Phypa1|25075  
AT1G09490.1,AT5G19440.1,AT1G09510.1,AT1G51410.1,AT1G09480.1 Phypa1|38776  
AT1G68540.1,AT1G25460.1 Phypa1|38991  
AT4G35420.1 Phypa1|28224  
AT1G80820.1,AT1G15950.1 Phypa1|24453  
AT4G27250.1,AT2G45400.1,AT1G66800.1  
AT5G58490.1,AT2G02400.1  
AT1G76470.1,AT2G33600.1  
AT1G09500.1  
AT1G61720.1,AT5G42800.1  
AT2G33590.1  
Phypa1|2708  
Phypa1|28913,Phypa1|25973  
AT5G60520.1,AT5G54370.1,AT4G27400.1,AT5G60530.1,AT1G54890.1  
Phypa1|1293,Phypa1|1295,Phypa1|1292,Phypa1|1294  
AT3G09890.1 Phypa1|27848  
AT2G46710.1,AT4G03100.1,AT5G22400.1 Phypa1|1922,Phypa1|1871  
AT2G27440.1,AT3G11490.1,AT1G08340.1  
Phypa1|1939,Phypa1|27613,Phypa1|1006,Phypa1|528  
AT3G05680.1 Phypa1|33674  
AT5G63540.1 Phypa1|34633  
AT3G45300.1 Phypa1|29360  
Phypa1|25418,Phypa1|22620,Phypa1|31119,Phypa1|21975,Phypa1|3098,Phypa1|22513  
Phypa1|30016,Phypa1|3007  
Phypa1|20591  
AT2G02955.1 Phypa1|38357  
AT3G43610.1 Phypa1|34030  
AT1G12480.1 Phypa1|968,Phypa1|1835  
AT5G24030.1,AT4G27970.1  
Phypa1|1794  
AT1G56180.1 Phypa1|26380  
AT3G27130.1 Phypa1|31816  
AT5G66180.1 Phypa1|9772  
AT3G42630.1 Phypa1|29750  
AT1G22620.1 Phypa1|26629,Phypa1|26260,Phypa1|37170  
AT3G43220.1,AT3G14205.1,AT5G20840.1  
AT1G17340.1  
Phypa1|29182  
AT3G47990.1 Phypa1|1026

AT3G13670.1 Phypa1|33975,Phypa1|38700  
AT2G25760.2  
AT3G03930.1,AT5G18190.1,AT3G03940.1  
Phypa1|7378  
AT1G47420.1 Phypa1|28805  
AT1G21480.1 Phypa1|26218  
AT4G29860.1 Phypa1|36961  
AT1G80670.1 Phypa1|32416  
AT1G49910.1,AT3G19590.1 Phypa1|23856  
AT1G15850.1  
AT1G69400.1  
Phypa1|28101,Phypa1|25647  
Phypa1|23845  
AT2G43370.1 Phypa1|9848  
AT4G13550.1 Phypa1|30187  
AT5G21040.1 Phypa1|39147  
AT4G35980.1 Phypa1|32848  
AT1G45201.1,AT3G14360.1  
Phypa1|24351,Phypa1|24299,Phypa1|24348,Phypa1|38521,Phypa1|25533,Phypa1|31004  
AT1G56630.1  
AT5G67050.1  
Phypa1|5685  
Phypa1|2565  
AT2G44660.1 Phypa1|36330  
AT4G35985.1,AT2G17840.1,AT3G51250.1  
Phypa1|995,Phypa1|38129,Phypa1|966,Phypa1|24933,Phypa1|997,Phypa1|37774  
AT4G15450.1,AT3G21600.1  
AT3G21590.1  
Phypa1|20729,Phypa1|39490,Phypa1|520  
Phypa1|21252  
AT4G10090.1 Phypa1|30310  
AT5G09820.2 Phypa1|26883  
AT5G49540.1 Phypa1|31714  
AT1G53645.1 Phypa1|34181  
AT3G18390.1 Phypa1|412  
AT4G14510.1,AT3G23070.1,AT3G01370.1,AT5G16180.1 Phypa1|25982,Phypa1|34056  
AT4G29750.1  
Phypa1|31516  
AT4G23840.1 Phypa1|37746  
AT3G56460.1 Phypa1|28227  
AT1G23180.1 Phypa1|36323  
AT3G47120.1 Phypa1|38320  
AT3G61700.1,AT2G46420.1 Phypa1|35469,Phypa1|34981  
AT5G02580.1,AT3G28990.1,AT3G55240.1,AT3G10250.1,AT5G04090.2  
AT1G04390.1 Phypa1|31880  
AT2G45870.1,AT3G61320.1 Phypa1|36489,Phypa1|38243  
Phypa1|1032,Phypa1|26340,Phypa1|1027,Phypa1|38402,Phypa1|26143,Phypa1|26564,Phypa1|6528,Phypa1|30705  
Phypa1|15759  
Phypa1|35078  
AT2G04740.1 Phypa1|33597  
AT3G52030.1 Phypa1|33900  
AT1G73470.1 Phypa1|28693  
AT1G76150.1 Phypa1|26546  
AT4G27360.1,AT1G52250.1,AT3G16120.1 Phypa1|26556,Phypa1|35967,Phypa1|26321  
AT1G23220.1,AT5G20110.1  
AT3G13800.1 Phypa1|39390  
AT1G19950.1,AT5G42560.1,AT1G75700.1 Phypa1|763,Phypa1|663,Phypa1|266,Phypa1|1191  
AT2G36020.1  
Phypa1|29478  
Phypa1|765  
AT1G48580.1 Phypa1|32808  
AT3G48190.1 Phypa1|13616  
AT5G21950.1,AT4G33180.1 Phypa1|30551,Phypa1|39274  
AT1G72620.1,AT5G09430.1,AT4G39955.1,AT1G17430.1,AT1G78210.1  
Phypa1|37835  
AT3G22810.1,AT5G43870.1,AT3G63300.1,AT4G14740.1 Phypa1|2881  
AT4G16670.1,AT4G17350.1,AT5G47440.1  
AT4G32785.1  
AT4G32780.1  
AT5G57770.1  
AT2G34460.1 Phypa1|38614  
AT2G16920.1 Phypa1|1751  
AT1G53020.1,AT2G33770.1,AT3G15355.1  
AT3G51880.2 Phypa1|811,Phypa1|812,Phypa1|23881  
AT1G20693.1,AT2G17560.1,AT1G20696.2  
AT4G35570.1  
AT2G34450.2  
AT5G23405.1  
Phypa1|34813  
AT1G34360.1 Phypa1|31885  
AT4G02280.1,AT5G49190.1 Phypa1|37898,Phypa1|37142,Phypa1|25506



AT3G43190.1  
 AT5G37180.1  
     Phypa1|36955  
 AT4G13670.1      Phypa1|34905  
 AT5G17290.1      Phypa1|29218  
 AT3G15150.1      Phypa1|36947  
 AT5G18250.1,AT3G04040.1      Phypa1|2365  
 AT2G45240.1      Phypa1|2482,Phypa1|24006  
 AT4G37040.1      Phypa1|30418,Phypa1|27258  
 AT3G25740.1,AT1G13270.1  
     Phypa1|31446  
     Phypa1|267  
     Phypa1|30810,Phypa1|31274  
     Phypa1|27876  
 AT4G20060.1      Phypa1|35701  
 AT1G73440.1      Phypa1|13539  
 AT5G15650.1,AT3G02230.1      Phypa1|38699,Phypa1|26683,Phypa1|24167,Phypa1|39070,Phypa1|2832  
 AT5G16510.1,AT3G08900.1  
 AT5G50750.1  
 AT3G13780.1      Phypa1|7108  
 AT4G10600.1,AT1G32800.1      Phypa1|27206  
 AT1G18660.4      Phypa1|24186  
 AT1G67950.3,AT5G16840.1,AT5G46870.1,AT4G17720.1      Phypa1|1972,Phypa1|1078  
     Phypa1|2013,Phypa1|38288,Phypa1|38917  
 AT2G20940.1      Phypa1|27505  
 AT1G63855.3      Phypa1|24372  
 AT5G01470.1      Phypa1|38718  
 AT3G43540.1      Phypa1|14143  
 AT4G00060.1      Phypa1|33763  
 AT4G00620.1,AT4G00600.1      Phypa1|26927,Phypa1|30075  
 AT2G38660.1  
 AT3G12290.1  
     Phypa1|31371  
     Phypa1|29661,Phypa1|27782,Phypa1|27993,Phypa1|25642  
 AT5G28830.1      Phypa1|35885  
 AT4G30840.1      Phypa1|12723  
 AT5G24630.1      Phypa1|32360,Phypa1|34006  
 AT3G04400.1,AT1G04480.1,AT2G33370.1  
     Phypa1|5026,Phypa1|38759,Phypa1|9348,Phypa1|38261,Phypa1|37851,Phypa1|26587,Phypa1|38987  
 AT2G33260.1      Phypa1|8484  
 AT3G57910.1      Phypa1|2894  
 AT3G29130.1      Phypa1|26638  
 AT1G54990.1      Phypa1|32348  
 AT5G05110.1,AT3G12490.2      Phypa1|26671,Phypa1|37729,Phypa1|29049  
 AT2G40880.1,AT5G12140.1  
 AT4G16500.1  
     Phypa1|28206  
 AT2G30970.1      Phypa1|34815  
 AT5G11520.1,AT5G19550.1,AT1G62800.2      Phypa1|28043  
 AT4G31990.3      Phypa1|34985,Phypa1|21937  
 AT3G13225.1      Phypa1|32674  
 AT3G47860.1      Phypa1|38041  
 AT2G36130.1      Phypa1|23707  
 AT5G13120.1,AT3G62030.1      Phypa1|28861,Phypa1|36861  
 AT5G67530.1      Phypa1|23763  
 AT2G29960.1,AT5G58710.1      Phypa1|37103,Phypa1|30068  
 AT2G38730.1      Phypa1|34890  
 AT3G44600.1      Phypa1|13411  
 AT1G01940.1      Phypa1|39159  
 AT4G33060.1      Phypa1|28598  
 AT3G63400.1      Phypa1|29686,Phypa1|26019  
 AT3G56070.1,AT4G38740.1,AT4G34870.1,AT2G16600.1,AT2G21130.1      Phypa1|35006  
 AT2G15790.1      Phypa1|39246,Phypa1|38566  
 AT4G34960.1  
 AT3G55920.1  
 AT4G32420.1  
 AT3G22920.1  
     Phypa1|2347  
     Phypa1|30903  
     Phypa1|26793  
     Phypa1|23928  
     Phypa1|2324  
     Phypa1|5872  
     Phypa1|25879  
     Phypa1|28341,Phypa1|29036,Phypa1|29145  
     Phypa1|2648  
     Phypa1|28137,Phypa1|37251  
     Phypa1|36437  
     Phypa1|36598  
     Phypa1|1600,Phypa1|26807  
     Phypa1|23937  
 AT2G28600.1      Phypa1|32053

AT1G28250.1 Phypa1|35403  
AT3G12040.1 Phypa1|27679  
AT3G19553.1 Phypa1|29812,Phypa1|29321,Phypa1|29931  
AT3G13620.1  
AT1G31820.1,AT1G31830.1,AT5G05630.1  
AT3G49160.1 Phypa1|29458  
Phypa1|29489  
AT1G34770.1 Phypa1|39334  
AT1G04985.1 Phypa1|33940  
AT1G30070.1 Phypa1|29127  
ATMG00080.1 Phypa1|28096  
AT3G16560.1 Phypa1|39416,Phypa1|1845  
AT5G02400.1,AT1G07630.1,AT2G28890.1 Phypa1|39699,Phypa1|38630  
AT2G46920.1,AT2G35350.1  
AT3G09400.1  
AT2G29640.1 Phypa1|37300  
AT2G32500.1 Phypa1|38211  
AT3G08800.1 Phypa1|32249  
AT3G05420.2,AT5G27630.1 Phypa1|23848,Phypa1|26212  
AT5G04420.1  
AT1G28540.1 Phypa1|28862  
AT5G27860.1 Phypa1|32346  
AT5G26667.1,AT3G60180.1 Phypa1|36864,Phypa1|39307  
AT4G25280.1  
Phypa1|30644,Phypa1|26565,Phypa1|26138  
Phypa1|30321  
Phypa1|26264  
AT1G26750.1 Phypa1|35706  
AT1G16290.1 Phypa1|25363  
AT5G20950.1,AT5G04885.1,AT5G20940.1 Phypa1|39795,Phypa1|32847,Phypa1|2999,Phypa1|37652  
AT3G47040.1,AT3G47000.1,AT3G47050.1,AT3G47010.1  
AT3G62710.1  
Phypa1|32732  
AT1G18730.1 Phypa1|27958  
AT5G17070.1 Phypa1|31693  
AT1G45332.1,AT2G45030.1 Phypa1|27466,Phypa1|38319  
AT1G62750.1 Phypa1|3022  
Phypa1|18228  
Phypa1|1730,Phypa1|22164,Phypa1|31380  
Phypa1|20548  
Phypa1|1744  
AT2G33180.1 Phypa1|4579,Phypa1|4578  
AT2G44790.1,AT3G60270.1,AT5G26330.1,AT2G31050.1,AT3G60280.1,AT2G32300.1,AT2G26720.1  
Phypa1|2117,Phypa1|2165,Phypa1|2330,Phypa1|1252,Phypa1|2197,Phypa1|4225,Phypa1|1171  
AT5G07475.1,AT3G27200.1  
AT1G72230.1,AT1G22480.1,AT5G20230.1  
AT4G32490.1,AT5G25090.1,AT4G31840.1,AT3G20570.1,AT2G25060.1  
AT1G17800.1,AT5G15350.1,AT2G02850.1,AT3G01070.1  
AT4G01380.1  
AT4G12880.1  
AT1G45063.1  
Phypa1|31729  
Phypa1|32774  
Phypa1|33475  
Phypa1|1611  
Phypa1|32834  
Phypa1|1667  
AT2G42560.1,AT4G36600.1,AT2G18340.1,AT3G53040.1 Phypa1|38772  
AT3G17520.1  
Phypa1|35263,Phypa1|34183  
Phypa1|1103  
AT5G57230.1 Phypa1|37751  
AT1G80290.1 Phypa1|29361  
AT1G34470.1,AT1G71900.1,AT4G09640.1 Phypa1|26229,Phypa1|39255  
AT4G38730.1,AT2G21120.1  
AT3G23870.1,AT4G13800.1  
AT3G12100.1 Phypa1|38318  
AT1G77290.1 Phypa1|37303  
AT2G34710.1,AT1G30490.1,AT5G60690.1,AT4G32880.1,AT1G52150.2  
Phypa1|36755,Phypa1|36583,Phypa1|36720,Phypa1|25064,Phypa1|37520  
AT5G40520.1 Phypa1|33790  
AT3G19810.1 Phypa1|33718  
AT5G12330.1 Phypa1|38310,Phypa1|39656  
AT1G19790.1,AT1G75520.1,AT4G36260.1,AT5G66350.1  
AT3G54430.1  
AT2G18120.1  
AT5G33210.1,AT3G51060.1  
AT2G21400.1  
AT1G49870.1 Phypa1|6890  
AT3G58470.1 Phypa1|29341  
AT4G36860.2,AT1G19270.1 Phypa1|25937,Phypa1|29561,Phypa1|47,Phypa1|30508  
AT2G39830.1

AT5G66620.1,AT5G66610.1,AT5G66640.1,AT5G17890.1  
     Phypa1|1852,Phypa1|37706,Phypa1|27760,Phypa1|30304,Phypa1|24579  
 AT1G77690.1,AT5G01240.1,AT2G38120.1,AT2G21050.1    Phypa1|2929,Phypa1|36927,Phypa1|29026  
     Phypa1|36599,Phypa1|26890  
     Phypa1|5563,Phypa1|27468  
     Phypa1|15020  
     Phypa1|29684  
 AT1G13030.1    Phypa1|34962  
 AT4G25330.1    Phypa1|33327  
 AT1G06510.1    Phypa1|33725  
 AT1G79850.1    Phypa1|1227,Phypa1|27168  
 AT1G26180.1    Phypa1|39776  
 AT2G28110.1,AT5G22940.1    Phypa1|24965,Phypa1|37655,Phypa1|29953  
 AT1G27440.1,AT5G61840.1    Phypa1|38191  
     Phypa1|19785  
 AT3G07480.1    Phypa1|283  
 AT4G09680.1    Phypa1|35812  
 AT5G42765.1    Phypa1|33467  
 AT2G20210.1    Phypa1|31532  
 AT1G05380.1,AT5G36670.1,AT5G58610.1,AT5G63900.1,AT3G14980.1,AT4G14920.1,AT5G36740.1  
     Phypa1|33079  
 AT2G46000.1    Phypa1|1553  
 AT1G49170.1    Phypa1|37061  
 AT2G27210.1,AT1G08420.1    Phypa1|37127,Phypa1|29784,Phypa1|32697,Phypa1|38743  
 AT1G03445.1,AT4G03080.1  
     Phypa1|22045,Phypa1|7754,Phypa1|19707  
     Phypa1|20056,Phypa1|35494  
 AT2G22530.1    Phypa1|30083  
 AT1G71790.1    Phypa1|24033  
 AT3G11960.1    Phypa1|37019  
 AT1G63000.1    Phypa1|29545,Phypa1|27214,Phypa1|19118,Phypa1|28846,Phypa1|28856,Phypa1|24070  
 AT1G78570.1,AT1G53500.1,AT3G14790.1  
 AT2G46915.1    Phypa1|1767  
 AT4G02725.1    Phypa1|278  
 AT3G10130.1    Phypa1|28389  
 AT2G19640.2    Phypa1|132  
 AT3G12010.1    Phypa1|39011  
 AT4G04460.1,AT1G11910.1,AT1G62290.1    Phypa1|36953,Phypa1|37002  
 AT1G69100.1,AT4G22050.1  
 AT1G22630.1    Phypa1|34376  
 AT1G30880.1    Phypa1|34405  
 AT3G16110.1,AT1G52260.1    Phypa1|24538,Phypa1|36819  
 AT5G60640.1,AT3G54960.1    Phypa1|26161,Phypa1|38516,Phypa1|39695  
     Phypa1|30629,Phypa1|3733  
     Phypa1|12962,Phypa1|35762,Phypa1|1798  
 AT3G12350.1    Phypa1|29499  
 AT5G38380.2    Phypa1|35020  
 AT3G24560.2    Phypa1|26017  
 AT4G10610.1    Phypa1|39287,Phypa1|26596  
 AT1G53650.1,AT3G14450.1  
 AT5G24440.1  
 AT3G49390.1  
 AT1G32790.2  
 AT5G02710.1    Phypa1|771  
 AT3G55480.1    Phypa1|36675  
 AT1G33330.1    Phypa1|6803  
 AT3G13320.1,AT1G55720.1,AT1G55730.1  
     Phypa1|29161,Phypa1|35458,Phypa1|37753,Phypa1|38328,Phypa1|26990  
 AT5G01490.1,AT3G51860.1,AT2G38170.3  
 AT5G57160.1    Phypa1|14308  
 AT1G79915.1    Phypa1|28830  
 AT2G28370.1,AT2G37200.1    Phypa1|25022,Phypa1|2545,Phypa1|26020  
 AT5G02060.1,AT3G53850.1,AT3G23200.1  
 AT3G50810.1,AT4G37235.1,AT1G49405.1  
     Phypa1|759  
 AT1G09290.1    Phypa1|11460  
 AT3G51010.1    Phypa1|31758  
 AT3G04790.1    Phypa1|27602,Phypa1|39371  
 AT5G44520.1    Phypa1|38263  
 AT1G71100.1,AT2G01290.1  
     Phypa1|31441,Phypa1|39517,Phypa1|29274  
     Phypa1|29511  
 AT1G55870.1    Phypa1|469  
     Phypa1|32979  
 AT3G14270.1,AT4G33240.1    Phypa1|38692,Phypa1|25829  
 AT1G71010.1  
 AT1G34260.1  
     Phypa1|25819,Phypa1|1748  
 AT4G34140.1    Phypa1|35716  
 AT4G38490.1    Phypa1|34945  
 AT5G58782.1,AT5G58770.1    Phypa1|25716,Phypa1|39148,Phypa1|35975  
 AT2G17570.1,AT5G60500.1,AT5G58780.1,AT5G60510.1

AT2G23400.1,AT2G23410.1,AT5G58784.1  
     Phypa1|208  
 AT5G38530.1           Phypa1|26216  
 AT2G46060.1           Phypa1|33878  
 AT1G53200.1           Phypa1|33583  
 AT5G38630.1           Phypa1|39344,Phypa1|39280  
 AT1G14730.1  
 AT4G25570.1  
 AT1G26100.1  
 AT5G57655.2           Phypa1|37483  
 AT5G22820.1           Phypa1|33105  
 AT1G70760.1           Phypa1|33706  
 AT2G38905.1,AT3G05880.1       Phypa1|36160,Phypa1|38739  
 AT1G57550.1  
     Phypa1|24391,Phypa1|36811  
     Phypa1|28947  
 AT4G16700.1           Phypa1|27350  
 AT5G64010.1           Phypa1|29046  
 AT2G28105.1           Phypa1|6540  
 AT2G47160.1,AT3G62270.1,AT3G06450.1   Phypa1|7319,Phypa1|27058  
 AT4G32510.1,AT1G15460.1,AT1G74810.1,AT5G25430.1  
     Phypa1|33401  
 AT2G05755.1           Phypa1|33254  
 AT2G40760.1           Phypa1|990,Phypa1|29817  
 AT4G28025.1           Phypa1|796  
 AT1G69420.1           Phypa1|32195,Phypa1|38486,Phypa1|11527  
 AT4G15080.1,AT2G33640.1,AT3G22180.1   Phypa1|27372,Phypa1|36692,Phypa1|37130  
 AT4G01730.1  
     Phypa1|31878  
 AT4G27390.1           Phypa1|34475  
 AT1G77550.1           Phypa1|36082  
 AT5G38060.1           Phypa1|2371  
 AT4G14110.1           Phypa1|27012  
 AT5G66810.1           Phypa1|29118  
 AT4G14605.1           Phypa1|36921  
 AT2G44020.1,AT4G02990.1       Phypa1|32509,Phypa1|989  
 AT4G38160.2  
     Phypa1|29496  
     Phypa1|29120  
 AT5G14760.1           Phypa1|29837  
 AT4G00590.1           Phypa1|26291  
 AT5G61540.1           Phypa1|26402  
 AT4G10100.1           Phypa1|38085  
 AT5G17380.1           Phypa1|39601  
 AT3G22760.1,AT3G04850.1,AT4G14770.1,AT3G22780.1   Phypa1|2124,Phypa1|34532  
     Phypa1|29780,Phypa1|2123  
 AT5G14220.1           Phypa1|26146  
 AT5G49555.1           Phypa1|29183  
 AT5G49550.1           Phypa1|2208  
 AT1G04010.1           Phypa1|37960  
 AT4G16310.1           Phypa1|25895  
 AT3G10390.1           Phypa1|39137,Phypa1|38585  
 AT4G29720.1  
 AT1G62830.1,AT3G13682.1  
 AT4G23330.1           Phypa1|2187  
 AT1G02020.1           Phypa1|928  
 AT2G29560.1           Phypa1|38499  
 AT1G74030.1           Phypa1|33458,Phypa1|33365  
 AT2G36530.1           Phypa1|24356,Phypa1|3276  
     Phypa1|3069  
     Phypa1|33993  
 AT3G20480.1           Phypa1|16558  
 AT1G50730.1           Phypa1|35684  
 AT1G51100.1           Phypa1|724  
 AT5G26760.2           Phypa1|35381  
 AT3G45050.3           Phypa1|31563  
 AT1G78690.1           Phypa1|37365  
 ATCG00440.1           Phypa1|31054  
 AT3G12650.1           Phypa1|27110  
 AT4G11980.1           Phypa1|27458  
 AT2G26340.1           Phypa1|35476  
 AT3G19870.1           Phypa1|36027  
 AT3G15140.1           Phypa1|39507  
 AT1G71430.1           Phypa1|34508  
 AT3G44010.1,AT4G33865.1,AT3G43980.1   Phypa1|26513,Phypa1|38190,Phypa1|26489,Phypa1|36832  
 AT2G43110.1           Phypa1|39420  
 AT4G25315.1           Phypa1|39183  
 AT3G22300.1           Phypa1|24313  
 AT2G22640.1           Phypa1|38479  
 AT3G29185.2           Phypa1|1883  
 AT3G02220.1           Phypa1|2108  
 AT2G04039.1           Phypa1|29700

|                                                                                                             |                                        |
|-------------------------------------------------------------------------------------------------------------|----------------------------------------|
| AT1G49410.1                                                                                                 | Phypa1 32115                           |
| AT3G23490.1                                                                                                 | Phypa1 29620                           |
| ATMG00830.1                                                                                                 | Phypa1 2960                            |
| ATMG00960.1                                                                                                 |                                        |
| AT4G35530.1                                                                                                 | Phypa1 263                             |
| AT2G35360.1                                                                                                 | Phypa1 5619                            |
| AT3G19120.1                                                                                                 | Phypa1 36951                           |
| AT2G42220.1                                                                                                 | Phypa1 28185                           |
| AT2G41950.1                                                                                                 | Phypa1 33007                           |
| AT1G01180.1                                                                                                 | Phypa1 24788,Phypa1 38588              |
| AT4G14145.1                                                                                                 | Phypa1 34776                           |
| AT1G29690.1                                                                                                 | Phypa1 27923,Phypa1 29241              |
| AT1G14780.1,AT4G24290.2,AT1G28380.1                                                                         |                                        |
| AT1G30845.1                                                                                                 | Phypa1 15637                           |
| AT4G19350.1                                                                                                 | Phypa1 4436                            |
| AT2G20790.1                                                                                                 | Phypa1 37498                           |
| AT3G52960.1                                                                                                 | Phypa1 706,Phypa1 38163,Phypa1 3181    |
| AT1G60740.1,AT1G65980.1,AT1G65970.1                                                                         | Phypa1 36444                           |
| AT3G06050.1                                                                                                 | Phypa1 36299                           |
|                                                                                                             | Phypa1 29906                           |
| AT2G02590.1                                                                                                 | Phypa1 1982                            |
| AT4G16695.1                                                                                                 | Phypa1 32116                           |
| AT3G59490.1                                                                                                 | Phypa1 16727                           |
| AT3G04160.1                                                                                                 | Phypa1 32203                           |
| AT5G20120.1                                                                                                 | Phypa1 751,Phypa1 743                  |
| AT3G32930.1                                                                                                 | Phypa1 25619                           |
| AT1G18480.1                                                                                                 | Phypa1 38907                           |
| AT1G70150.1                                                                                                 | Phypa1 37941                           |
| AT3G57170.1                                                                                                 | Phypa1 25202                           |
| AT3G48195.1                                                                                                 | Phypa1 37339                           |
| AT5G05560.1                                                                                                 | Phypa1 33907                           |
| AT1G54650.1                                                                                                 | Phypa1 29092                           |
| ATMG00110.1                                                                                                 | Phypa1 29363                           |
| AT2G41760.1                                                                                                 | Phypa1 38989                           |
| AT3G09860.1                                                                                                 | Phypa1 8273                            |
| AT2G45860.1                                                                                                 | Phypa1 20452                           |
| AT4G32560.1                                                                                                 | Phypa1 9688                            |
| AT4G28820.1                                                                                                 | Phypa1 35871                           |
| AT4G19720.1,AT4G19800.1,AT4G19750.1,AT4G19760.1,AT4G19820.1,AT4G19740.1,AT4G19730.1,AT4G19770.1,AT4G19810.1 | Phypa1 28228,Phypa1 30407              |
|                                                                                                             | Phypa1 2318                            |
| AT1G07910.1                                                                                                 | Phypa1 26401                           |
| AT1G12244.1                                                                                                 | Phypa1 2036                            |
| AT5G60370.1                                                                                                 | Phypa1 30395                           |
| AT5G59460.1                                                                                                 | Phypa1 16134                           |
| AT3G57320.1                                                                                                 | Phypa1 34468                           |
| AT3G50430.1                                                                                                 | Phypa1 32987                           |
| AT1G45150.1                                                                                                 | Phypa1 28549                           |
| AT3G13845.1                                                                                                 | Phypa1 34447                           |
| AT5G16810.1                                                                                                 | Phypa1 28122                           |
| AT1G15220.1                                                                                                 | Phypa1 36582                           |
| AT1G51080.1                                                                                                 | Phypa1 20335                           |
| AT5G46070.1                                                                                                 | Phypa1 36798,Phypa1 30409              |
| AT1G03830.1                                                                                                 |                                        |
|                                                                                                             | Phypa1 29560,Phypa1 28151              |
|                                                                                                             | Phypa1 5206                            |
| AT2G45320.1                                                                                                 | Phypa1 25452                           |
| AT5G35520.1                                                                                                 | Phypa1 6530                            |
| AT2G16790.1                                                                                                 | Phypa1 26843                           |
| AT3G45040.1                                                                                                 | Phypa1 8582                            |
| AT4G31460.1                                                                                                 | Phypa1 2110                            |
| AT1G80490.1,AT1G15750.1                                                                                     | Phypa1 27441,Phypa1 29962              |
| AT3G16830.1,AT5G27030.1                                                                                     |                                        |
| AT3G15880.2                                                                                                 |                                        |
| AT2G25420.1                                                                                                 |                                        |
| AT5G55500.1                                                                                                 | Phypa1 39486                           |
| AT3G19800.1                                                                                                 | Phypa1 34338                           |
| AT1G69980.1                                                                                                 | Phypa1 31835                           |
| AT5G43750.1                                                                                                 | Phypa1 34911                           |
| AT1G20770.1                                                                                                 | Phypa1 33274                           |
| AT1G74640.1                                                                                                 | Phypa1 29009                           |
| AT4G14970.1                                                                                                 | Phypa1 34663                           |
| AT5G56140.1,AT4G26480.1                                                                                     | Phypa1 39389,Phypa1 36735,Phypa1 24048 |
| AT3G08620.1,AT2G38610.1                                                                                     |                                        |
| AT1G09660.1                                                                                                 |                                        |
| AT1G70570.1                                                                                                 | Phypa1 26774,Phypa1 36719              |
| AT4G29660.1                                                                                                 | Phypa1 29157                           |
| AT4G01880.1                                                                                                 | Phypa1 28558                           |
| AT2G22370.1                                                                                                 | Phypa1 39724                           |
| AT5G03770.1                                                                                                 | Phypa1 24110                           |
| AT2G26540.1                                                                                                 | Phypa1 27251                           |
| AT3G25690.1                                                                                                 | Phypa1 36550,Phypa1 34833              |

AT4G04980.1,AT4G18570.1  
 AT1G48280.1  
 AT1G07120.1  
     Phypa1|898  
 AT3G56210.1    Phypa1|7015  
 AT5G01590.1    Phypa1|27665  
 AT2G43400.1    Phypa1|2513  
 AT5G42700.1,AT3G19184.1    Phypa1|28553,Phypa1|39722,Phypa1|2074,Phypa1|32441,Phypa1|24722  
 AT5G58280.1  
 AT3G09210.1    Phypa1|33699  
 AT4G29560.1    Phypa1|31829  
 AT2G01590.1    Phypa1|34524  
 AT3G62360.1    Phypa1|35118  
 AT5G39940.1    Phypa1|27073  
 AT3G49890.1    Phypa1|32631  
 AT1G34380.1    Phypa1|36633  
 AT5G20935.1    Phypa1|34652  
 AT5G02410.1    Phypa1|29736  
 AT1G73380.1    Phypa1|38508  
 AT1G02460.1,AT1G48100.1,AT1G56710.1,AT4G01890.1    Phypa1|36132  
 AT1G60590.1,AT1G10640.1,AT3G26610.1,AT5G14650.1  
 AT1G80170.1  
 AT4G32370.1  
 AT1G09960.1    Phypa1|27248,Phypa1|37670,Phypa1|37682,Phypa1|38921  
 AT2G02860.1    Phypa1|37763,Phypa1|31622  
 AT1G66570.1,AT1G22710.1,AT5G43610.1,AT1G71880.1,AT5G06170.1,AT1G71890.1,AT2G14670.1  
 AT1G55280.1    Phypa1|31593  
 AT2G35035.1    Phypa1|32780  
 AT1G48360.1    Phypa1|26851  
 AT2G20495.1    Phypa1|2669  
 AT1G47260.1,AT1G19580.1,AT5G66510.1    Phypa1|23993,Phypa1|36301  
 AT5G63510.1,AT3G48680.1    Phypa1|25892,Phypa1|24439  
     Phypa1|31296  
     Phypa1|38242  
     Phypa1|567  
 AT5G63690.1    Phypa1|27695  
 AT5G01350.1    Phypa1|35835  
 AT1G79260.1    Phypa1|39237  
 AT4G37090.1    Phypa1|33651  
 AT2G22090.2,AT3G56860.1,AT2G18830.1,AT3G15010.1,AT2G41060.1    Phypa1|1957  
 AT2G22100.1  
     Phypa1|1899  
     Phypa1|2017  
 AT4G14500.1,AT3G23080.1    Phypa1|30790,Phypa1|28948  
 AT3G13062.2,AT1G55960.1    Phypa1|30358  
 AT5G54170.1,AT1G64720.1  
 AT5G67550.1    Phypa1|32305,Phypa1|33036,Phypa1|10496,Phypa1|15256,Phypa1|15461,Phypa1|31969  
 AT1G71110.1,AT2G12400.1,AT1G80540.1,AT2G25270.1  
 AT5G59950.1,AT5G02530.1    Phypa1|26943,Phypa1|35650,Phypa1|2661,Phypa1|24554  
 AT1G66260.1,AT5G37720.1  
 AT3G06850.1    Phypa1|27998  
 AT3G13930.1,AT1G54220.1    Phypa1|26967  
 AT3G52200.1    Phypa1|30898,Phypa1|36873  
     Phypa1|11833  
     Phypa1|3009  
 AT1G49050.1    Phypa1|502,Phypa1|29988,Phypa1|30296  
 AT1G77480.1,AT1G44130.1,AT4G33490.1  
     Phypa1|3248  
     Phypa1|13152  
     Phypa1|4489  
 AT3G52140.1    Phypa1|38269  
 AT1G01320.1    Phypa1|1745,Phypa1|1350  
 AT1G15290.1  
 AT4G28080.1  
     Phypa1|35279  
 AT1G48840.1,AT3G18350.1    Phypa1|38035,Phypa1|25334,Phypa1|25512  
 AT1G71240.1    Phypa1|26651,Phypa1|26214  
 AT2G21720.1  
 AT5G23390.1  
     Phypa1|11590  
 AT1G78130.1,AT5G10190.1    Phypa1|28370,Phypa1|28704  
 AT2G18590.1,AT4G36790.1    Phypa1|26414  
     Phypa1|26955  
     Phypa1|3803  
 AT3G43790.3,AT5G13750.1,AT5G13740.1    Phypa1|25105,Phypa1|36909  
     Phypa1|25440  
 AT5G39830.1    Phypa1|25649  
 AT3G27925.1    Phypa1|28887,Phypa1|28458  
 AT4G18370.1    Phypa1|588  
     Phypa1|25295,Phypa1|36836  
 AT1G32230.1,AT2G35510.1    Phypa1|32301,Phypa1|170,Phypa1|29085  
 AT1G23550.1,AT1G70440.1,AT5G62520.1,AT3G47720.1

AT3G02070.1,AT3G22260.2 Phypa1|25631,Phypa1|30656,Phypa1|27235  
AT5G04250.1,AT5G03330.1  
AT2G39320.1  
AT5G04140.2,AT2G41220.1 Phypa1|37624  
AT5G53460.1 Phypa1|27045,Phypa1|27334,Phypa1|36617  
Phypa1|36441  
Phypa1|22003  
Phypa1|19363  
Phypa1|38804  
AT2G33570.1,AT5G44670.1 Phypa1|39392,Phypa1|494,Phypa1|38477,Phypa1|25650  
AT3G07380.1,AT5G48190.1,AT4G20170.1,AT3G60990.1  
Phypa1|25421,Phypa1|17077,Phypa1|497,Phypa1|81  
Phypa1|25788,Phypa1|27686  
Phypa1|31026  
Phypa1|35682  
AT3G29785.1 Phypa1|346  
AT1G29780.1,AT5G45700.1,AT1G29770.1 Phypa1|30284  
AT4G18140.1,AT5G46410.1,AT5G11860.1  
AT3G45310.1,AT5G60360.1 Phypa1|28910  
AT5G43060.1,AT3G19390.1,AT1G47128.1  
Phypa1|39541,Phypa1|38589,Phypa1|2480,Phypa1|39520,Phypa1|38316  
AT4G39090.1,AT2G21430.1,AT4G16190.1 Phypa1|37936,Phypa1|38606  
AT3G43960.1,AT3G19400.1,AT4G23520.1,AT4G36880.1  
AT1G29080.1,AT3G49340.1,AT1G29110.1,AT5G45890.1,AT1G20850.1,AT1G29090.1,AT4G35350.1,AT2G34080.1,A  
T2G27420.1  
AT2G22160.1,AT5G50260.1,AT3G48350.1,AT3G48340.1  
AT1G09850.1  
AT2G27395.1  
AT4G11320.1,AT4G11310.1  
AT1G06260.1  
AT3G54940.3  
AT1G45688.1,AT2G41990.1,AT5G42860.1 Phypa1|32880,Phypa1|27938  
AT3G24600.1  
AT3G08490.1  
Phypa1|16014  
AT1G49520.1,AT3G19080.1 Phypa1|27233,Phypa1|37040  
AT3G03590.1,AT3G48600.1,AT2G35605.1,AT1G31760.1 Phypa1|27101  
AT4G34290.1,AT2G14880.1  
AT4G26810.1  
Phypa1|25466  
AT2G01810.1,AT1G66170.1 Phypa1|29613,Phypa1|29949  
AT2G07714.1,AT5G22260.1,ATMG00550.1  
AT1G33420.1  
AT4G34050.1 Phypa1|25127  
AT3G62000.1,AT3G61990.1 Phypa1|28922  
AT1G67990.1,AT1G24735.1,AT1G67980.1,AT4G26220.1  
AT5G55630.1 Phypa1|30143  
AT4G18160.1,AT5G46370.1,AT4G01840.1 Phypa1|24772,Phypa1|512  
AT5G46360.1  
AT1G02510.1  
Phypa1|15445  
AT3G51280.1 Phypa1|24753,Phypa1|25181,Phypa1|24747  
AT5G44330.1,AT4G20900.1  
AT1G04770.1,AT5G48850.1  
Phypa1|4242  
Phypa1|2003  
AT3G51780.1 Phypa1|26547,Phypa1|23673  
AT5G14360.1,AT5G40630.1  
AT5G52060.1,AT5G07220.1,AT5G62100.1  
AT5G24400.1,AT3G49360.1 Phypa1|3158  
AT5G24420.1,AT5G24410.1  
AT1G13700.1  
Phypa1|35070  
AT4G10840.1,AT3G27960.1,AT1G27500.1 Phypa1|1808,Phypa1|2245,Phypa1|39491,Phypa1|28610  
AT2G31240.1 Phypa1|36159,Phypa1|34354  
Phypa1|20450  
AT5G47240.1,AT5G47650.1 Phypa1|38257,Phypa1|25922  
AT2G04450.1,AT4G12720.1,AT2G04430.1  
AT2G04440.1  
AT4G25434.2  
Phypa1|3519  
AT3G58670.1,AT2G42670.1 Phypa1|37818,Phypa1|217,Phypa1|16026  
AT5G39890.1,AT5G15120.1,AT1G18490.1  
AT1G09880.1,AT2G22620.1,AT1G09910.1 Phypa1|37125,Phypa1|26531  
AT1G09890.1  
AT4G24430.1,AT4G37950.1,AT4G38030.1  
AT1G65210.1  
AT3G23530.1,AT3G23510.1 Phypa1|37081  
AT3G23470.1,AT3G23480.1  
AT3G23460.1  
AT4G18360.1,AT3G14420.1,AT3G14415.1 Phypa1|32425,Phypa1|31791,Phypa1|38962  
AT3G14150.1,AT3G14130.1

Phypa1|33723  
Phypa1|24062  
AT3G11210.1,AT2G38180.1 Phypa1|39375  
AT5G45920.1,AT5G62930.1  
AT2G01170.1 Phypa1|36493  
Phypa1|28530,Phypa1|29467  
Phypa1|16313  
AT2G21170.1 Phypa1|2782,Phypa1|29969,Phypa1|38162,Phypa1|26560,Phypa1|36385  
AT3G55440.1 Phypa1|24489  
Phypa1|30807  
Phypa1|8726  
Phypa1|11825  
AT3G53410.1,AT5G03200.1,AT3G09770.1 Phypa1|39069,Phypa1|547  
AT5G19080.1,AT3G06140.1  
AT5G19570.1 Phypa1|29809  
AT1G62740.1,AT4G12400.2,AT1G12270.1,AT4G08320.2 Phypa1|20797  
AT5G55480.1,AT4G26690.1,AT1G66980.1,AT1G66970.1,AT5G58050.1,AT5G58170.1,AT3G20520.1  
Phypa1|25325,Phypa1|32109  
Phypa1|27177  
AT4G29540.2 Phypa1|30346  
AT1G68060.1,AT2G01750.1,AT1G24764.1,AT1G14840.1 Phypa1|1783,Phypa1|37255,Phypa1|25  
AT4G17220.1  
Phypa1|19810,Phypa1|5187  
Phypa1|4438  
Phypa1|30  
Phypa1|5188  
Phypa1|5207  
AT3G04880.1 Phypa1|37923  
AT3G20660.1 Phypa1|38842  
AT1G79360.1,AT1G16390.1,AT1G79410.1,AT1G73220.1,AT1G16370.1  
AT1G76570.1 Phypa1|24005  
AT3G61470.1 Phypa1|30115,Phypa1|2486,Phypa1|39422,Phypa1|36311  
AT1G15820.1 Phypa1|2583,Phypa1|25531  
AT2G05100.1,AT3G27690.1,AT2G05070.1  
Phypa1|26271,Phypa1|23745,Phypa1|32895,Phypa1|38784,Phypa1|39236,Phypa1|39263,Phypa1|15738,  
Phypa1|31491,Phypa1|39250,Phypa1|24292,Phypa1|35815,Phypa1|36053,Phypa1|30799,Phypa1|36148,Phypa1|240  
41,Phypa1|38609,Phypa1|36062,Phypa1|24320  
AT4G10340.1 Phypa1|31140,Phypa1|2304,Phypa1|2305  
AT3G08940.2,AT5G01530.1 Phypa1|39176,Phypa1|39756,Phypa1|39755,Phypa1|39175  
AT1G45474.1 Phypa1|2006  
AT5G54270.1 Phypa1|39455  
AT1G61520.1 Phypa1|29070,Phypa1|2931,Phypa1|30648,Phypa1|28878  
AT3G54890.1 Phypa1|39195,Phypa1|28419,Phypa1|29400  
AT5G28450.1  
AT1G19150.1  
AT3G47470.1  
AT1G29930.1,AT2G34430.1,AT2G34420.1,AT1G29910.1,AT1G29920.1  
AT2G40100.1  
Phypa1|30110  
Phypa1|5822,Phypa1|29443  
Phypa1|3110  
Phypa1|11910  
Phypa1|22191  
AT1G77670.1 Phypa1|13631,Phypa1|26620  
Phypa1|21363  
Phypa1|38258  
Phypa1|21163  
ATCG00770.1 Phypa1|31277  
AT1G17665.1 Phypa1|32684  
AT2G45540.1 Phypa1|397,Phypa1|26590,Phypa1|25086  
AT3G60920.1  
Phypa1|32002,Phypa1|35749  
AT3G12380.1 Phypa1|29879  
AT5G28770.2 Phypa1|166  
AT5G24800.1  
Phypa1|34673,Phypa1|39335  
Phypa1|2231,Phypa1|2228,Phypa1|2229  
AT1G79870.1 Phypa1|23927,Phypa1|24355  
AT5G28310.1,AT1G12550.1,AT2G45630.2  
AT5G63980.1,AT5G09290.1,AT5G64000.1,AT5G63990.1 Phypa1|27077  
AT5G54390.1 Phypa1|32813,Phypa1|37390  
AT4G05090.1 Phypa1|550  
AT1G77020.1,AT1G76700.1,AT1G21080.1 Phypa1|28399,Phypa1|25537,Phypa1|29987,Phypa1|30570  
AT2G21510.1,AT4G39150.1  
Phypa1|14563  
Phypa1|1425  
AT2G24830.1 Phypa1|36242  
AT1G71980.1,AT4G09560.1,AT1G22670.1,AT1G35630.1 Phypa1|25511,Phypa1|18595,Phypa1|38858,Phypa1|614  
AT1G35625.1  
AT5G66160.1  
Phypa1|27044  
AT2G24395.1 Phypa1|34271



AT1G19310.1,AT2G23780.1 Phypa1|28519  
AT1G74990.1  
AT4G28270.1,AT4G27470.1,AT4G03510.1  
AT5G60940.1 Phypa1|31956  
AT1G15000.1 Phypa1|39474  
AT3G02110.1,AT3G07990.1,AT2G24000.1,AT2G35780.1,AT4G30610.1,AT2G24010.1  
Phypa1|28265,Phypa1|26887  
AT3G10410.1,AT3G45010.1,AT5G22980.1 Phypa1|38654,Phypa1|31213,Phypa1|37341  
AT3G25420.1,AT4G12910.1 Phypa1|28024  
AT1G11080.1,AT1G61130.1,AT4G30810.1,AT5G23210.1,AT3G17180.1  
AT2G35770.1  
AT3G63470.1  
AT3G56540.1  
AT5G22960.1  
Phypa1|25049  
Phypa1|9048  
Phypa1|28759,Phypa1|26464,Phypa1|2758,Phypa1|23854  
Phypa1|2547,Phypa1|30999,Phypa1|12013  
Phypa1|28514  
Phypa1|2921,Phypa1|24433  
Phypa1|30417  
AT3G13340.1,AT5G56190.2,AT1G55680.1 Phypa1|25657,Phypa1|30344  
AT1G36070.1,AT1G78070.2  
AT5G59850.1,AT1G07770.1,AT3G46040.1,AT2G39590.1  
Phypa1|36662,Phypa1|39004,Phypa1|24301,Phypa1|38558,Phypa1|36428,Phypa1|38102  
AT2G19720.1,AT4G29430.1  
AT4G37480.1 Phypa1|33182  
AT2G25720.1 Phypa1|35454  
AT5G09510.1,AT1G04270.1,AT5G43640.1,AT5G09490.1,AT5G09500.1  
Phypa1|36067,Phypa1|24016,Phypa1|2892,Phypa1|36484,Phypa1|27312  
AT5G63070.1  
AT1G33850.1  
Phypa1|4939  
AT5G20220.1 Phypa1|24535  
AT4G27270.1,AT5G54500.1 Phypa1|38623,Phypa1|23760  
AT4G36750.1 Phypa1|38132  
AT5G58800.1  
Phypa1|2941  
Phypa1|19951  
Phypa1|2372  
AT3G19780.1 Phypa1|32689  
AT2G45720.1,AT1G01830.1 Phypa1|39160,Phypa1|25285,Phypa1|37045,Phypa1|32320  
AT2G05810.1  
AT5G50900.1  
AT1G61350.1  
AT1G18860.1,AT4G04450.1,AT5G15130.1,AT1G69810.1,AT1G62300.1,AT4G01720.1,AT4G22070.1  
Phypa1|3539  
AT1G28470.1,AT4G29230.1,AT5G56620.1,AT4G28500.1 Phypa1|1987  
AT5G14490.1,AT1G25580.1,AT3G01600.1  
AT1G02160.1 Phypa1|28489  
AT1G60230.1 Phypa1|32655  
AT2G39670.2 Phypa1|29880  
AT3G19630.1 Phypa1|39235  
Phypa1|30769  
Phypa1|1910  
AT2G41680.1 Phypa1|35803,Phypa1|31692  
AT2G17420.1,AT4G35460.1 Phypa1|24746,Phypa1|31682  
Phypa1|31013,Phypa1|31321  
Phypa1|21355  
Phypa1|3106  
AT5G23520.1 Phypa1|32415  
AT5G26594.1 Phypa1|1666,Phypa1|1665,Phypa1|2373  
AT3G04280.1  
AT1G26560.1,AT5G54570.1 Phypa1|24271,Phypa1|12593,Phypa1|31691  
AT5G36890.1 Phypa1|38964,Phypa1|23934,Phypa1|26929  
AT1G02850.2,AT3G18080.1  
AT2G44470.1,AT5G28510.1,AT1G52400.1,AT1G75940.1,AT3G09260.1,AT3G21370.1,AT3G60140.1,AT2G44490.1,AT5G24550.1,AT2G44460.1,AT1G66270.1,AT1G66280.1,AT5G24540.1,AT3G60120.1  
AT1G61820.1,AT1G61810.1  
AT1G47600.1  
AT3G18070.1  
AT5G44640.1,AT5G42260.1,AT2G44480.1,AT3G60130.1,AT2G44450.1,AT2G25630.1  
AT1G60090.1,AT4G27830.1,AT3G62740.1,AT4G27820.1,AT4G22100.1,AT3G62750.1,AT5G16580.1,AT1G45191.2  
AT1G51470.1,AT5G26000.1,AT5G25980.2,AT1G51490.1  
AT3G03640.1,AT2G32860.2  
AT4G21760.1  
Phypa1|25951,Phypa1|37445  
Phypa1|25311  
Phypa1|5503  
Phypa1|1174  
AT1G16360.1,AT1G79450.1,AT3G12740.1,AT1G54320.1 Phypa1|36881,Phypa1|38396  
AT5G46150.1

Phypa1|28970  
Phypa1|28116,Phypa1|37037  
AT1G73320.1 Phypa1|28186  
AT3G02540.1,AT5G38470.1 Phypa1|29748,Phypa1|26461  
AT5G16090.1  
AT1G16190.1,AT1G79650.1  
Phypa1|2500  
AT5G48480.1 Phypa1|23975  
AT1G55265.1 Phypa1|1537,Phypa1|26534  
AT5G54530.1,AT3G07460.2,AT3G07470.1,AT5G16380.1,AT1G61667.1  
AT5G19860.1  
AT2G39100.1 Phypa1|35626  
AT4G15470.1 Phypa1|25431,Phypa1|2453,Phypa1|2776  
AT4G02690.1,AT3G63310.1,AT1G03070.1  
AT4G14730.1  
AT2G44990.1 Phypa1|25013  
AT5G19750.1 Phypa1|32477  
AT5G43140.1,AT4G33905.1,AT2G14860.1 Phypa1|1108  
Phypa1|1095  
Phypa1|31728  
Phypa1|212  
AT3G47830.1 Phypa1|35910  
AT1G43850.1,AT4G25520.1,AT5G62090.1 Phypa1|35182,Phypa1|32635,Phypa1|31884  
Phypa1|14038  
AT1G73020.1 Phypa1|24389  
AT1G02500.1,AT4G01850.1,AT3G17390.1 Phypa1|29375,Phypa1|2958,Phypa1|17632  
AT2G36880.1  
Phypa1|38960  
Phypa1|26166  
AT1G12000.1,AT4G04040.1 Phypa1|39204,Phypa1|37167,Phypa1|23976  
AT1G20950.1,AT1G76550.1 Phypa1|39217,Phypa1|2553  
AT3G22210.1 Phypa1|3957  
AT4G22140.1 Phypa1|29822,Phypa1|24071,Phypa1|2082  
AT4G39100.1  
AT4G04260.1  
Phypa1|2897,Phypa1|30378  
Phypa1|13519  
Phypa1|36914  
AT5G24280.1 Phypa1|20084  
AT5G13480.1 Phypa1|2262  
AT5G67320.1 Phypa1|37493  
AT1G71840.1 Phypa1|36332  
AT5G50230.1 Phypa1|31651,Phypa1|2889  
AT4G29830.1 Phypa1|36199,Phypa1|23729  
AT5G64730.1 Phypa1|3054  
AT2G43770.1,AT3G49660.1,AT4G02730.1,AT5G16750.1,AT2G05720.1,AT5G52820.1  
Phypa1|32878,Phypa1|26834,Phypa1|27820,Phypa1|2638,Phypa1|37119,Phypa1|35015,Phypa1|14757,Phypa1|25550,Phypa1|34138,Phypa1|30516,Phypa1|37826,Phypa1|32253  
AT4G32990.1,AT2G26060.1 Phypa1|551  
AT2G41500.1  
Phypa1|21464  
Phypa1|34132  
Phypa1|16351,Phypa1|14955,Phypa1|27589,Phypa1|35297  
AT1G05520.1,AT4G14160.2,AT3G23660.1 Phypa1|3221,Phypa1|23971,Phypa1|36579  
AT2G21630.1  
Phypa1|38785  
Phypa1|39249  
AT5G49730.1,AT5G49740.1 Phypa1|39793,Phypa1|25954  
AT1G01590.1,AT1G23020.1,AT5G50160.1,AT1G01580.1,AT5G23990.1,AT5G23980.1  
Phypa1|12079,Phypa1|25040,Phypa1|32958,Phypa1|33560  
AT2G02010.1,AT5G17330.1,AT2G02000.1,AT3G17760.1 Phypa1|2259,Phypa1|26722,Phypa1|23770,Phypa1|35996  
AT1G65960.1  
AT3G17720.1  
Phypa1|10812  
AT5G67580.1,AT1G17520.1,AT1G49950.1,AT1G72740.1,AT3G49850.1 Phypa1|1203,Phypa1|284  
Phypa1|1734  
AT5G03050.1 Phypa1|8416  
AT3G24730.1 Phypa1|2532  
AT1G75710.1,AT4G27240.1 Phypa1|32000,Phypa1|37877  
AT5G54630.1,AT1G11490.1  
AT2G29660.1  
AT1G64570.1 Phypa1|14221  
AT3G18220.1,AT3G02600.1,AT1G15080.1,AT2G01180.1 Phypa1|2060,Phypa1|37744  
Phypa1|1465,Phypa1|32379,Phypa1|1085,Phypa1|24534  
AT5G46630.2 Phypa1|38618,Phypa1|39293  
AT1G60780.1,AT1G10730.1 Phypa1|35419,Phypa1|24065  
AT4G24550.2 Phypa1|27259  
AT1G49850.1 Phypa1|887,Phypa1|862  
AT3G19950.1 Phypa1|34822  
AT5G20910.1 Phypa1|29803  
AT2G15580.1  
AT1G18780.1,AT2G29840.1,AT1G18760.1

AT5G60820.1,AT3G13430.1,AT3G02340.1,AT5G64920.1,AT5G01980.1,AT5G08139.1,AT5G15820.1  
 AT1G26800.1,AT5G59550.1,AT1G14200.1,AT5G56340.1  
 AT2G39720.1,AT3G46620.1,AT3G56580.1  
 AT3G13228.1,AT3G60080.1,AT1G55530.1,AT1G60360.1,AT1G74620.1,AT1G18770.1,AT4G26400.1  
 AT3G10815.1,AT2G40830.1  
 AT2G44330.1  
 AT2G03000.1  
 AT3G30460.1  
     Phypa1|1729  
     Phypa1|1264  
     Phypa1|1263,Phypa1|24710,Phypa1|24893  
 AT5G12860.1    Phypa1|25170  
 AT5G64290.1,AT5G64280.1    Phypa1|4145,Phypa1|34258,Phypa1|39579,Phypa1|23959  
 AT1G02780.1,AT4G02230.1,AT3G16780.1  
     Phypa1|37312,Phypa1|24066,Phypa1|38827,Phypa1|2447,Phypa1|39411,Phypa1|33897,Phypa1|32865,P  
 hypa1|1555  
 AT4G16030.1  
 AT3G59980.1    Phypa1|2043  
 AT4G13780.1    Phypa1|23903,Phypa1|3376  
 AT2G40660.1    Phypa1|36716  
 AT5G02680.1  
     Phypa1|32766  
 AT5G39210.1    Phypa1|29032  
 AT4G17270.1,AT5G47540.1    Phypa1|38725,Phypa1|34851  
 AT5G18940.1    Phypa1|29844,Phypa1|2970  
 AT2G03410.1  
 AT1G34540.1,AT3G48520.1,AT3G56630.1    Phypa1|36635,Phypa1|37918  
 AT5G08250.1,AT5G23190.1,AT1G24540.1    Phypa1|36443,Phypa1|30121  
 AT1G69500.1    Phypa1|36741,Phypa1|26739  
 AT3G01900.1,AT2G27690.1,AT5G63450.1  
 AT1G63710.1,AT2G45970.1,AT1G01600.1,AT4G00360.1,AT5G58860.1  
 AT1G65340.1,AT4G39480.1,AT4G32170.1,AT2G23180.1,AT4G39510.1,AT2G21910.1,AT1G47620.1,AT1G57750.1,A  
 T4G39500.1,AT5G52320.1,AT5G02900.1,AT4G39490.1  
 AT1G13150.1,AT1G13140.1,AT3G26125.1  
 AT5G51900.1  
 AT2G45510.1,AT2G44890.1  
     Phypa1|9568  
     Phypa1|2606  
     Phypa1|27499  
     Phypa1|29873  
 AT2G16910.1    Phypa1|34220  
 AT1G12860.1,AT3G26744.1    Phypa1|32328,Phypa1|38601  
 AT5G10570.1,AT5G65640.1  
     Phypa1|25420  
     Phypa1|37490  
     Phypa1|1240  
     Phypa1|34730  
 AT1G06500.1    Phypa1|822  
 AT5G20130.1    Phypa1|32828  
 AT5G64220.1,AT5G09410.1,AT2G22300.1    Phypa1|1759  
 AT4G16150.1,AT3G16940.1  
 AT1G67310.1  
     Phypa1|801  
     Phypa1|7033  
 AT5G40480.1    Phypa1|32947  
 AT1G12930.1    Phypa1|36839,Phypa1|36616  
 AT2G48120.1    Phypa1|28571  
 AT2G46270.1,AT1G32150.1,AT4G36730.1,AT2G35530.1,AT4G01120.1  
     Phypa1|1328,Phypa1|1329,Phypa1|1332  
 AT5G16715.1    Phypa1|26800  
 AT1G14610.1    Phypa1|36880  
 AT1G27160.1  
     Phypa1|3074  
 AT1G07840.1    Phypa1|2291

A-P OGs in tree approach  
 ArabidopsisPoplar  
 AT2G42220    Poptr1|583630  
 AT5G07720    Poptr1|744171,Poptr1|569966  
 AT4G38310  
     Poptr1|565720  
 AT1G18690,AT1G74380  
 AT3G62720,AT4G02500    Poptr1|745896,Poptr1|565718  
     Poptr1|102517  
 AT2G22900,AT4G37690    Poptr1|655536,Poptr1|663687  
     Poptr1|702533  
 AT5G34881,AT5G34887,AT5G34905,AT5G34885,AT5G34883,AT5G42957,AT5G42955,AT4G07515,AT4G08025,AT1  
 G57760,AT3G44115,AT5G34910    Poptr1|592496  
 AT1G09645    Poptr1|583498,Poptr1|596754  
     Poptr1|591668  
 AT3G60590    Poptr1|677578,Poptr1|591659  
     Poptr1|575455

AT2G33550 Poptr1|548101,Poptr1|554693  
AT5G45900 Poptr1|583242,Poptr1|713847  
AT3G53320,AT2G37070 Poptr1|589396  
AT2G38890 Poptr1|353437  
AT4G10030 Poptr1|574189  
AT2G31082 Poptr1|568621  
AT2G31085,AT2G31083 Poptr1|574352  
AT1G60870 Poptr1|671976,Poptr1|717275  
AT5G01860 Poptr1|585117,Poptr1|555101,Poptr1|578878,Poptr1|583672  
AT5G14010 Poptr1|566778  
AT5G10970,AT5G25160 Poptr1|554866,Poptr1|547939,Poptr1|561966  
AT5G05120 Poptr1|351336,Poptr1|576084  
Poptr1|593469,Poptr1|549753  
AT3G04490 Poptr1|573720  
AT4G18940,AT4G18930 Poptr1|707098,Poptr1|584264,Poptr1|568493  
AT1G20620  
AT4G35090 Poptr1|685210  
Poptr1|98898  
AT1G20630 Poptr1|550767,Poptr1|694906  
Poptr1|558346  
Poptr1|558348,Poptr1|709681  
AT2G27900 Poptr1|558347  
Poptr1|75340,Poptr1|573271  
Poptr1|586052,Poptr1|671028,Poptr1|678709  
AT1G03830 Poptr1|671026,Poptr1|586051,Poptr1|545251  
AT5G46070 Poptr1|559151,Poptr1|590979  
Poptr1|671027  
AT2G31490 Poptr1|560685  
AT5G42070 Poptr1|646769,Poptr1|640334  
Poptr1|590740  
Poptr1|48633  
AT1G02410  
AT3G12180 Poptr1|583611,Poptr1|576307  
AT4G12090  
Poptr1|552056  
AT1G12340,AT1G12390,AT1G62880 Poptr1|704228,Poptr1|646501  
Poptr1|691187,Poptr1|682098  
AT4G39520 Poptr1|718913  
AT1G17470,AT1G72660  
AT1G27750 Poptr1|572044  
Poptr1|572045  
AT5G47840 Poptr1|574224,Poptr1|678179  
AT5G35170 Poptr1|578803  
Poptr1|352284  
AT3G05430,AT5G27650 Poptr1|744505  
AT1G48560 Poptr1|350946  
Poptr1|581799  
AT5G66220,AT3G55120 Poptr1|687375  
AT3G49890 Poptr1|709568  
AT4G38220 Poptr1|721245,Poptr1|703580  
AT1G44180,AT1G44820 Poptr1|643640  
AT2G32050,AT3G43250  
AT1G17130 Poptr1|707808,Poptr1|728078  
AT1G68440,AT1G25400 Poptr1|686325,Poptr1|566609  
AT3G21330 Poptr1|548935  
Poptr1|674749,Poptr1|560933  
AT4G00120  
AT5G09750 Poptr1|650581,Poptr1|654633  
Poptr1|594423  
AT5G67060,AT3G50330 Poptr1|651077,Poptr1|76104,Poptr1|347647,Poptr1|591967  
AT2G40510,AT2G40590,AT3G56340  
Poptr1|571636,Poptr1|574100  
AT4G18150 Poptr1|674782,Poptr1|55814  
Poptr1|674781  
AT5G46380 Poptr1|551244  
AT1G29370,AT1G29350  
Poptr1|592950  
AT1G54390 Poptr1|573914,Poptr1|571214  
AT3G24010 Poptr1|711962  
Poptr1|576817,Poptr1|586102,Poptr1|72105,Poptr1|72318,Poptr1|101853,Poptr1|349012,Poptr1|65861,Poptr1|103453,Poptr1|65862,Poptr1|546183,Poptr1|97707,Poptr1|97688,Poptr1|349851,Poptr1|352435  
Poptr1|64751,Poptr1|580559,Poptr1|355725,Poptr1|348299,Poptr1|571334,Poptr1|348466,Poptr1|104262,  
Poptr1|545983,Poptr1|355026,Poptr1|105019  
AT3G19790 Poptr1|595968  
Poptr1|584416,Poptr1|586176,Poptr1|354804,Poptr1|579335,Poptr1|65365,Poptr1|591325,Poptr1|354630,  
Poptr1|583029,Poptr1|562336,Poptr1|589564  
Poptr1|545165,Poptr1|593441,Poptr1|354981,Poptr1|64353,Poptr1|552675,Poptr1|97409,Poptr1|593997  
Poptr1|98671,Poptr1|72299,Poptr1|64406,Poptr1|579487,Poptr1|65713,Poptr1|347387,Poptr1|593507,Poptr1|581090,Poptr1|104158,Poptr1|579890,Poptr1|577517,Poptr1|565048,Poptr1|103723,Poptr1|581091,Poptr1|592449,Poptr1|72219,Poptr1|572326,Poptr1|71978,Poptr1|65252,Poptr1|65241,Poptr1|98373  
AT4G22450 Poptr1|700030  
Poptr1|579889

Poptr1|64666,Poptr1|63991  
Poptr1|355080  
Poptr1|63918,Poptr1|593427  
Poptr1|566419  
AT1G16020,AT1G80910 Poptr1|566418,Poptr1|696489  
AT3G50610,AT1G59835 Poptr1|76132,Poptr1|579766,Poptr1|558854  
Poptr1|593781  
AT4G35740 Poptr1|593782  
Poptr1|700101  
AT1G60930,AT1G10930 Poptr1|553407,Poptr1|553405  
AT1G31360 Poptr1|343525  
AT1G27880  
AT3G05740 Poptr1|60623  
Poptr1|48189  
AT2G35736 Poptr1|671244  
AT2G25690,AT5G11460,AT1G79970 Poptr1|668964,Poptr1|561807,Poptr1|691219  
Poptr1|592347,Poptr1|594310,Poptr1|594184,Poptr1|738752  
AT1G22840,AT4G10040  
AT1G17820,AT1G73200 Poptr1|591177,Poptr1|585895,Poptr1|99198  
AT5G42350,AT5G42360 Poptr1|642795,Poptr1|597342,Poptr1|559968,Poptr1|559969  
AT3G47833,AT5G62575 Poptr1|661965,Poptr1|688484  
Poptr1|575063,Poptr1|562648,Poptr1|592125  
AT4G33440 Poptr1|71523,Poptr1|562469  
AT3G42950 Poptr1|589311  
AT1G19170  
AT4G23500  
AT4G23820 Poptr1|646742  
AT3G61490 Poptr1|106516,Poptr1|712603,Poptr1|548424,Poptr1|552198  
AT3G06770,AT5G49215 Poptr1|565505,Poptr1|703717  
AT3G16850  
AT3G62110Poptr1|572522,Poptr1|552618  
AT5G41870  
AT2G23900,AT3G48950 Poptr1|546549  
AT5G04600 Poptr1|660197  
AT3G43910,AT3G43900,AT2G26840 Poptr1|649892  
AT3G51540  
AT3G08670 Poptr1|561010,Poptr1|577207  
Poptr1|685209  
AT2G17200,AT2G17190 Poptr1|54254,Poptr1|703572  
AT2G24580 Poptr1|583126,Poptr1|737485  
Poptr1|62757  
AT1G51110Poptr1|580531,Poptr1|62756  
AT5G42690 Poptr1|644150,Poptr1|740321  
AT4G37080 Poptr1|71984,Poptr1|76134,Poptr1|644149  
AT1G64520,AT5G42040 Poptr1|640320,Poptr1|554520  
AT3G22630,AT4G14800 Poptr1|564859,Poptr1|678915,Poptr1|566218  
AT1G15810,AT1G80620 Poptr1|693218  
AT2G05370 Poptr1|106111  
AT4G11130Poptr1|575133  
Poptr1|58557,Poptr1|561891  
Poptr1|581278  
AT3G49500  
AT1G14790 Poptr1|564680  
Poptr1|354308  
Poptr1|562646  
AT5G10070 Poptr1|715953  
AT3G62010 Poptr1|552400,Poptr1|572500  
AT1G08580  
Poptr1|571664,Poptr1|665394  
Poptr1|679813,Poptr1|697116  
AT2G27840  
AT5G03740  
Poptr1|589563  
Poptr1|582808  
AT3G44750,AT5G22650  
Poptr1|581841  
AT3G11630,AT5G06290  
Poptr1|576525,Poptr1|561430  
Poptr1|559938,Poptr1|565932,Poptr1|562136,Poptr1|575949,Poptr1|580838,Poptr1|565934,Poptr1|55993  
9,Poptr1|342120,Poptr1|346588  
Poptr1|577364,Poptr1|577363  
Poptr1|575948,Poptr1|652392,Poptr1|562144  
Poptr1|641962  
Poptr1|562137  
AT3G26040 Poptr1|658194,Poptr1|657422,Poptr1|565907  
Poptr1|544832,Poptr1|544829,Poptr1|671648  
Poptr1|570600,Poptr1|575658,Poptr1|575654,Poptr1|670332,Poptr1|579978,Poptr1|562105,Poptr1|56036  
1,Poptr1|560362,Poptr1|344078,Poptr1|577265  
AT1G24430 Poptr1|595107  
AT4G15390,AT3G30280,AT5G47950,AT4G15400,AT5G47980,AT5G23970,AT1G24420  
AT2G37870 Poptr1|657041,Poptr1|566380  
AT3G53980 Poptr1|560837,Poptr1|576862

AT5G05960 Poptr1|656164  
AT5G38510 Poptr1|580779  
Poptr1|574151  
Poptr1|103818,Poptr1|678257  
AT5G09380 Poptr1|554164  
AT4G25180  
AT1G11160,AT1G61210 Poptr1|568273  
AT5G23430,AT5G08390 Poptr1|353095  
Poptr1|568413  
AT2G24395 Poptr1|583188  
AT3G12190 Poptr1|595519,Poptr1|595521,Poptr1|595520  
AT1G35680 Poptr1|683154,Poptr1|592237  
AT4G30930 Poptr1|575353  
AT1G24360 Poptr1|697938  
Poptr1|588969  
Poptr1|584743  
AT2G29260 Poptr1|64334  
AT2G29170,AT2G29150,AT2G29370,AT2G29360,AT2G29290,AT2G29350,AT2G29320,AT2G29300,AT2G29310,AT2  
G29340,AT2G29330,AT2G30670,AT1G07450,AT1G07440 Poptr1|706088  
Poptr1|570603,Poptr1|695629  
Poptr1|105688,Poptr1|699770,Poptr1|570880,Poptr1|723905  
Poptr1|586941,Poptr1|656666  
Poptr1|107210  
Poptr1|588720  
Poptr1|680387  
AT5G06060 Poptr1|55523,Poptr1|720123  
Poptr1|580528  
Poptr1|717182,Poptr1|560806  
Poptr1|558020  
AT4G05530 Poptr1|687472  
Poptr1|676322  
Poptr1|589675  
AT5G01300  
Poptr1|58211  
Poptr1|734245  
AT2G38480 Poptr1|560960  
AT3G10330 Poptr1|695550,Poptr1|688724  
Poptr1|585171,Poptr1|584948  
AT3G29380,AT4G10680,AT5G39230  
AT3G57370  
AT2G41630 Poptr1|57566  
AT5G58200 Poptr1|653536  
AT1G16740 Poptr1|545384,Poptr1|684177  
Poptr1|61679  
AT1G30130  
Poptr1|579077  
Poptr1|347021,Poptr1|694672  
AT4G19645,AT1G31300 Poptr1|674640,Poptr1|575532  
AT4G10360 Poptr1|574446  
AT1G47610  
AT2G26490 Poptr1|644171,Poptr1|677771  
AT5G50120 Poptr1|106081,Poptr1|661956,Poptr1|575107  
AT3G18950,AT1G49450 Poptr1|671384,Poptr1|649486  
AT4G34380  
AT3G50390 Poptr1|76202,Poptr1|558820  
AT3G51930 Poptr1|350825,Poptr1|547859  
Poptr1|352781  
AT1G24530 Poptr1|565969  
Poptr1|349595  
AT1G24130  
AT1G06720 Poptr1|594614  
Poptr1|567074,Poptr1|557462,Poptr1|557464  
Poptr1|584167  
AT4G34260 Poptr1|707380,Poptr1|557461,Poptr1|65242,Poptr1|549960  
AT4G13750 Poptr1|691695  
Poptr1|671773,Poptr1|715001,Poptr1|560072  
AT3G22640 Poptr1|566216  
AT3G57180 Poptr1|560441  
Poptr1|555251  
AT4G10620 Poptr1|62742  
Poptr1|576220  
Poptr1|554742,Poptr1|683595  
AT5G65890 Poptr1|56929,Poptr1|76482  
AT1G69040 Poptr1|354063,Poptr1|723867  
AT4G22780  
AT2G03730  
AT5G25320 Poptr1|561921,Poptr1|737249  
AT1G12420 Poptr1|350122,Poptr1|743948  
AT3G01990 Poptr1|579544,Poptr1|64981  
AT1G76990 Poptr1|692760,Poptr1|72533

Poptr1|355907,Poptr1|570303  
Poptr1|643553  
AT5G53710 Poptr1|560212,Poptr1|569621,Poptr1|574672  
AT5G50680,AT5G50580,AT4G24940 Poptr1|728680,Poptr1|575384  
AT3G52610 Poptr1|561484,Poptr1|576579,Poptr1|352501  
AT3G49055 Poptr1|575841  
AT1G24560 Poptr1|590250,Poptr1|565126,Poptr1|354760  
AT5G42150 Poptr1|73073  
Poptr1|569734  
AT1G06470 Poptr1|704653  
AT4G10970,AT4G23910 Poptr1|640353,Poptr1|693373  
Poptr1|349611  
Poptr1|705795,Poptr1|349613  
AT3G03940,AT5G18190,AT3G03930  
AT3G13670 Poptr1|547648,Poptr1|684710  
AT2G25760 Poptr1|561734,Poptr1|736966  
AT3G16460,AT3G21380,AT1G52040,AT1G52030,AT3G16470  
Poptr1|741602,Poptr1|594664  
AT1G60110,AT1G60095,AT1G60130,AT5G49860,AT5G49870,AT5G49850,AT1G52120,AT1G52130,AT5G38540,AT5  
G38550,AT1G57570,AT5G28520,AT1G33790,AT1G52060,AT1G52070,AT1G52050,AT2G25980,AT5G35950,AT5G35  
940,AT1G52100  
AT2G39310,AT2G39330  
AT5G46000,AT1G05760  
AT3G16430,AT3G16420,AT1G52000  
AT1G58160  
AT3G16440,AT3G16450  
AT1G33320  
Poptr1|351427,Poptr1|576184  
AT3G01120Poptr1|688950  
AT3G57050  
Poptr1|589161  
AT1G73320 Poptr1|746486  
AT3G60380 Poptr1|591796,Poptr1|692488  
AT1G70180 Poptr1|565403,Poptr1|696299,Poptr1|678806  
AT5G49560,AT3G50850 Poptr1|696097  
AT1G67325 Poptr1|554787,Poptr1|640028  
AT4G35987  
AT4G35990 Poptr1|553989,Poptr1|593833  
AT3G27420,AT5G40600 Poptr1|646343  
AT4G18590,AT3G52630 Poptr1|596230,Poptr1|695171,Poptr1|680539  
Poptr1|660157  
AT3G02170,AT5G15580  
AT1G74160,AT1G18620 Poptr1|699477  
AT3G14950,AT1G53300 Poptr1|745239,Poptr1|745241,Poptr1|568822  
AT1G78120 Poptr1|551563,Poptr1|559120  
AT5G10090,AT5G65160 Poptr1|562618,Poptr1|71653  
AT3G58620,AT2G42580  
AT2G41760 Poptr1|695537  
AT1G17680 Poptr1|582731,Poptr1|594398  
AT5G48205  
AT2G41835,AT3G57480  
AT3G28210 Poptr1|569129  
Poptr1|560516  
AT1G62020,AT2G21390 Poptr1|570035,Poptr1|733199  
AT5G16810 Poptr1|738378  
Poptr1|355291  
AT5G24260 Poptr1|661521,Poptr1|688424  
AT5G59440 Poptr1|706919  
AT4G35980 Poptr1|689695  
AT5G03120 Poptr1|576663,Poptr1|675981  
AT5G01170,AT3G09070  
AT2G38070 Poptr1|576924,Poptr1|560877  
AT5G58930,AT3G46990 Poptr1|641100,Poptr1|650171  
AT4G26960,AT5G54970 Poptr1|351533  
AT4G23570,AT4G11260 Poptr1|741126,Poptr1|546552,Poptr1|563059  
AT1G29300 Poptr1|555635,Poptr1|568669  
AT4G34080,AT2G45260,AT4G33320 Poptr1|342688  
Poptr1|571886  
AT1G53380,AT3G14870 Poptr1|728288,Poptr1|585494  
AT2G30380  
AT4G36100 Poptr1|574494  
AT2G32130  
AT5G58960 Poptr1|650190  
AT3G60680 Poptr1|730821,Poptr1|342684  
Poptr1|698357  
AT3G17365  
AT3G60910 Poptr1|64503  
AT2G35850,AT3G52360 Poptr1|576459,Poptr1|561177  
AT2G43680 Poptr1|574410,Poptr1|103909,Poptr1|582750  
AT3G15980,AT1G52360  
AT1G79990 Poptr1|548670,Poptr1|693709  
Poptr1|578330,Poptr1|694998

AT4G16295 Poptr1|556828,Poptr1|556829,Poptr1|594949,Poptr1|99603,Poptr1|576466,Poptr1|349059  
AT1G69390 Poptr1|564264,Poptr1|47304  
Poptr1|712786  
AT1G24320,AT1G67490 Poptr1|106263,Poptr1|697923,Poptr1|565044  
AT4G01750,AT4G01770,AT1G56550,AT4G01220 Poptr1|711264,Poptr1|731230  
AT4G17050 Poptr1|704030,Poptr1|589924  
AT1G61140,AT1G11100 Poptr1|713719,Poptr1|568265  
AT5G43530 Poptr1|580162  
AT5G22750  
AT3G20010,AT1G50410,AT3G16600  
AT1G05120 Poptr1|664745  
Poptr1|700564  
Poptr1|571976,Poptr1|108251,Poptr1|584408,Poptr1|571975  
AT1G02670  
Poptr1|576144  
Poptr1|566114  
AT2G01650 Poptr1|720213  
Poptr1|642209  
AT4G04460  
Poptr1|572979,Poptr1|692186  
Poptr1|60554,Poptr1|570655,Poptr1|54878  
AT1G69100 Poptr1|572978  
AT4G22050  
AT1G11910,AT1G62290 Poptr1|568056,Poptr1|673589  
AT1G25290  
Poptr1|693798  
AT3G59500,AT1G30890 Poptr1|591647,Poptr1|679588,Poptr1|594531,Poptr1|685924  
Poptr1|573187  
Poptr1|578734,Poptr1|352349  
Poptr1|747254,Poptr1|349772  
AT5G21960  
AT1G75490 Poptr1|559789,Poptr1|643046  
AT1G74930  
AT2G20880  
Poptr1|551301,Poptr1|72619  
Poptr1|692892,Poptr1|651887  
Poptr1|548122,Poptr1|554668  
AT4G17490,AT5G47230  
AT5G18560  
Poptr1|718816,Poptr1|71658  
Poptr1|569239,Poptr1|65810  
AT5G25190 Poptr1|561963,Poptr1|654211,Poptr1|737318  
AT1G46768  
AT1G78080,AT1G22190  
AT5G43410,AT1G04370 Poptr1|674314,Poptr1|647913  
AT3G20310,AT1G50640 Poptr1|691789  
AT5G13330 Poptr1|554686,Poptr1|63210  
Poptr1|572351,Poptr1|348048  
AT3G61630,AT2G46310  
AT2G40220 Poptr1|656279,Poptr1|567245  
AT1G24590  
AT5G25390,AT5G11190 Poptr1|352920,Poptr1|737192  
AT2G36450 Poptr1|560236,Poptr1|575994  
AT5G61600  
AT1G63030,AT1G12610 Poptr1|63608,Poptr1|548519  
Poptr1|661455,Poptr1|674556  
AT1G12630,AT5G52020 Poptr1|57787,Poptr1|570520,Poptr1|548517,Poptr1|343602  
AT4G13620 Poptr1|106037,Poptr1|577425,Poptr1|549823  
Poptr1|65105,Poptr1|668371  
AT2G23340,AT4G36900,AT3G50260,AT5G67190  
AT4G28140 Poptr1|571755  
AT1G64380 Poptr1|350343,Poptr1|63433  
AT4G34410  
AT5G53290,AT4G27950  
AT5G44210  
Poptr1|646133,Poptr1|676412  
Poptr1|571923  
AT1G28160  
AT1G77200  
AT1G28370  
Poptr1|555768,Poptr1|704189  
AT1G49120  
AT2G40350,AT2G40340,AT5G05410,AT3G11020  
AT3G16280  
AT3G23230  
AT4G18450  
AT1G80580  
AT1G22810,AT1G71520 Poptr1|592362,Poptr1|574180  
AT4G31060 Poptr1|652926  
Poptr1|72356,Poptr1|347362  
AT2G35700,AT4G16750  
AT1G01250 Poptr1|592505,Poptr1|644595,Poptr1|644594,Poptr1|731369



Poptr1|700421,Poptr1|710290  
AT1G33760 Poptr1|574198,Poptr1|678198,Poptr1|343347  
AT2G20350,AT5G67010,AT5G67000,AT1G12890  
Poptr1|548900,Poptr1|645979,Poptr1|587390  
AT1G15360  
Poptr1|571083,Poptr1|665280  
Poptr1|594051,Poptr1|97249  
AT5G19790 Poptr1|555201,Poptr1|547598,Poptr1|571194,Poptr1|58918  
AT4G06746 Poptr1|558888,Poptr1|655111  
Poptr1|552112,Poptr1|572182  
AT2G25820  
AT3G25890 Poptr1|564525  
Poptr1|548216,Poptr1|588764  
Poptr1|97205,Poptr1|693949,Poptr1|579433,Poptr1|660903  
AT4G39780,AT2G22200,AT5G65130  
Poptr1|677693,Poptr1|677694  
AT2G33710 Poptr1|551084,Poptr1|72844  
AT5G64750  
AT4G25470,AT4G25480,AT4G25490,AT5G51990 Poptr1|346104,Poptr1|666968  
Poptr1|592717  
AT1G28360 Poptr1|591781  
AT2G47520 Poptr1|553816,Poptr1|673241  
AT3G23220  
AT1G25470,AT1G68550  
Poptr1|674316,Poptr1|647912  
AT2G38340 Poptr1|342247  
AT2G31230,AT1G06160  
AT5G18450  
Poptr1|695735,Poptr1|594648  
AT1G53910,AT3G14230  
AT2G44940,AT3G60490 Poptr1|579903,Poptr1|551989  
AT3G23240 Poptr1|551047,Poptr1|72875,Poptr1|55074  
AT1G19210 Poptr1|589322,Poptr1|739199  
Poptr1|103213,Poptr1|353886  
AT3G57600 Poptr1|576331,Poptr1|652757  
AT1G36060,AT1G71130  
AT1G77640,AT1G21910,AT1G44830 Poptr1|342429,Poptr1|595209,Poptr1|651392  
Poptr1|643162,Poptr1|72874  
AT5G25810,AT5G11590 Poptr1|108388,Poptr1|561750,Poptr1|668897  
AT1G71450 Poptr1|548836,Poptr1|574197  
Poptr1|63455,Poptr1|350317  
AT4G32800  
AT3G15210,AT1G53170,AT1G43160  
Poptr1|558646,Poptr1|654928  
Poptr1|54324,Poptr1|594822  
AT4G23750,AT4G11140  
Poptr1|643452  
AT5G13910 Poptr1|676396,Poptr1|349740  
Poptr1|63048,Poptr1|554858  
Poptr1|696765,Poptr1|567214  
Poptr1|97516,Poptr1|557385  
AT5G07310,AT5G61890,AT1G22985 Poptr1|570362  
Poptr1|644094,Poptr1|740456  
AT5G61590,AT5G07580  
AT1G03800  
AT5G51190Poptr1|548217,Poptr1|588763  
AT3G16770 Poptr1|742345,Poptr1|697804  
AT4G17500,AT5G47220  
Poptr1|560607  
Poptr1|658375  
Poptr1|655154  
Poptr1|103964,Poptr1|591541,Poptr1|553919  
Poptr1|589320,Poptr1|668932  
Poptr1|548218,Poptr1|554595  
AT1G72360  
Poptr1|560950  
AT5G50080  
Poptr1|561557  
AT2G44840  
AT1G12980  
AT5G36160  
AT4G28420,AT2G20610,AT4G28410,AT2G24850,AT4G23600,AT4G23590  
AT5G53970 Poptr1|579421,Poptr1|104263,Poptr1|55946  
Poptr1|585574,Poptr1|75319  
Poptr1|562159,Poptr1|562160,Poptr1|594645,Poptr1|594647,Poptr1|680943,Poptr1|67210  
2,Poptr1|582454,Poptr1|703490  
AT1G76150 Poptr1|652170  
AT5G22320 Poptr1|741761  
AT3G49600  
Poptr1|716695,Poptr1|684516  
AT5G60750 Poptr1|646685,Poptr1|548394  
Poptr1|579693

Poptr1|589707  
AT2G47510,AT5G50950 Poptr1|552480  
Poptr1|556457,Poptr1|557264  
AT4G34460  
Poptr1|565719  
AT2G47770 Poptr1|552424,Poptr1|705389,Poptr1|572713  
AT3G04300  
AT4G10300  
AT4G10290,AT4G10280  
AT4G28703 Poptr1|692016  
AT1G42440 Poptr1|550780,Poptr1|694900  
AT3G03773 Poptr1|573963,Poptr1|580974  
AT4G02450  
Poptr1|643409,Poptr1|559448  
Poptr1|570483,Poptr1|575789  
AT5G52220  
AT1G11560,AT1G61790 Poptr1|568205  
AT1G04635 Poptr1|732715,Poptr1|574618,Poptr1|740698  
AT1G24470 Poptr1|565101,Poptr1|587519  
Poptr1|565951  
AT1G67730 Poptr1|341947,Poptr1|565952  
Poptr1|564779  
AT3G01410 Poptr1|714469  
AT1G24090  
AT5G51080 Poptr1|564778,Poptr1|726687  
AT5G16610 Poptr1|552945  
AT2G21290 Poptr1|557169,Poptr1|556543  
AT3G26100  
AT3G02300 Poptr1|60931  
Poptr1|569586,Poptr1|680778  
AT5G60870 Poptr1|746227  
AT3G15430 Poptr1|703960,Poptr1|660977  
AT3G02510,AT5G16040 Poptr1|690092  
AT5G63860 Poptr1|718641  
AT1G65920 Poptr1|545539,Poptr1|592818  
AT3G23270,AT4G14370 Poptr1|354582  
AT1G27060 Poptr1|575469  
Poptr1|574713  
AT5G48330  
Poptr1|555037,Poptr1|547820  
AT3G47660  
AT1G69710  
AT1G76950 Poptr1|559354,Poptr1|710838  
AT5G42140  
AT5G08710 Poptr1|71594  
AT5G19420,AT5G12350 Poptr1|691503,Poptr1|697454  
AT3G20320 Poptr1|53071  
AT2G31220,AT1G06170,AT2G31210,AT2G31215 Poptr1|352156  
Poptr1|588898  
AT1G48030,AT3G17240 Poptr1|698344,Poptr1|686374  
AT4G12740 Poptr1|573155  
AT4G21320 Poptr1|555458,Poptr1|660497  
Poptr1|590756  
AT3G56300,AT5G38830 Poptr1|354190,Poptr1|698229  
AT2G31170Poptr1|58576  
Poptr1|564547  
AT1G55365,AT3G13500 Poptr1|571205  
AT5G56520 Poptr1|555187,Poptr1|547586  
AT2G48110Poptr1|572803,Poptr1|552662  
Poptr1|734409  
AT3G23590 Poptr1|354923  
AT2G21340 Poptr1|697242,Poptr1|721896  
AT4G39030  
Poptr1|557184  
AT5G02770 Poptr1|667725,Poptr1|675939  
AT3G19670  
Poptr1|572009  
Poptr1|65316  
Poptr1|347558  
AT1G44910  
AT5G58740  
Poptr1|557925,Poptr1|681816  
AT2G04620 Poptr1|356854  
Poptr1|106026,Poptr1|657854,Poptr1|640874,Poptr1|592583,Poptr1|553489,Poptr1|593232,Poptr1|59335  
7,Poptr1|674267,Poptr1|656893  
AT2G35040 Poptr1|687164  
AT3G45050 Poptr1|697744  
Poptr1|554108,Poptr1|740041,Poptr1|571405  
AT2G06200  
AT4G37740,AT2G22840  
AT2G36400  
Poptr1|718037

Poptr1|663704  
 AT5G53660 Poptr1|569624,Poptr1|574678  
 Poptr1|646519,Poptr1|548554  
 Poptr1|663705,Poptr1|551755  
 AT2G45480 Poptr1|572129  
 AT4G24150 Poptr1|548247  
 AT3G16810 Poptr1|596085,Poptr1|565506  
 AT4G05440 Poptr1|562404  
 Poptr1|577356  
 Poptr1|560500  
 AT3G09490  
 AT5G02590  
 AT3G53560,AT2G37400 Poptr1|667715,Poptr1|561509,Poptr1|569468  
 AT3G18420  
 AT1G01990  
 AT1G34780,AT4G08930 Poptr1|716495,Poptr1|551583  
 AT5G06160 Poptr1|102225,Poptr1|569530,Poptr1|574785  
 Poptr1|593155  
 AT4G28310,AT1G52270 Poptr1|582717  
 AT2G18650,AT4G30400 Poptr1|561397,Poptr1|578665  
 AT4G11360  
 AT5G46650  
 AT1G23980  
 Poptr1|570875  
 Poptr1|575132,Poptr1|570067  
 AT3G60220 Poptr1|347792  
 AT1G72220 Poptr1|643829  
 AT1G63840  
 AT3G61460 Poptr1|644490,Poptr1|572290  
 AT5G57750  
 AT5G40250 Poptr1|577508,Poptr1|64732  
 AT4G20150 Poptr1|548173,Poptr1|554622  
 AT1G07080 Poptr1|641521,Poptr1|557627  
 Poptr1|1105466,Poptr1|579338,Poptr1|570351,Poptr1|580437,Poptr1|577027,Poptr1|560939  
 AT5G01580 Poptr1|735919  
 AT4G12870,AT4G12900,AT4G12890,AT4G12960  
 Poptr1|551612  
 AT1G35220 Poptr1|551613  
 AT4G11570Poptr1|554365,Poptr1|548466,Poptr1|584937,Poptr1|568637  
 AT3G49800,AT5G65910 Poptr1|655535,Poptr1|571988  
 AT2G10950 Poptr1|560567,Poptr1|702292  
 AT1G10720 Poptr1|572018  
 AT3G06180 Poptr1|565653,Poptr1|565318  
 AT1G61150  
 AT1G11110,AT4G09300  
 Poptr1|713714  
 AT3G57570 Poptr1|695522  
 Poptr1|560538  
 AT5G20200 Poptr1|702307,Poptr1|560595  
 AT3G48180,AT1G19020 Poptr1|570042,Poptr1|666406  
 AT1G63810 Poptr1|593934,Poptr1|76302  
 AT4G19160 Poptr1|691311,Poptr1|740903  
 AT5G19070 Poptr1|725743,Poptr1|686163  
 AT1G03260  
 Poptr1|668881  
 AT3G18380 Poptr1|584262,Poptr1|728097,Poptr1|65554  
 AT1G15215 Poptr1|705799  
 AT5G18180,AT3G03920  
 Poptr1|573923,Poptr1|571210  
 AT2G01880  
 AT2G01890,AT1G14700  
 Poptr1|354339,Poptr1|696483,Poptr1|103988  
 AT3G17790 Poptr1|743529,Poptr1|345659  
 AT1G25230 Poptr1|571295,Poptr1|595792,Poptr1|573678  
 Poptr1|566395  
 Poptr1|704105  
 AT3G62810 Poptr1|700445  
 Poptr1|590446  
 AT2G45440,AT3G60880 Poptr1|730895,Poptr1|684354  
 AT3G18220  
 AT2G01180  
 AT1G15080 Poptr1|687176  
 AT3G02600 Poptr1|343109,Poptr1|546481,Poptr1|354205  
 AT5G20970,AT2G27140 Poptr1|556907,Poptr1|703525  
 AT5G04890 Poptr1|697018  
 Poptr1|355780,Poptr1|581347  
 AT3G10680  
 AT1G54400 Poptr1|573951,Poptr1|571175  
 AT5G61910 Poptr1|590063  
 AT2G32910 Poptr1|595527,Poptr1|596537,Poptr1|570913,Poptr1|678665,Poptr1|105786  
 Poptr1|593954  
 AT4G36650 Poptr1|76276

AT5G58920 Poptr1|64300,Poptr1|682514  
 AT1G61700,AT1G11475 Poptr1|675915,Poptr1|684938  
 Poptr1|573351  
 AT3G27530 Poptr1|49167  
 AT5G47700,AT1G01100,AT4G00810 Poptr1|666054,Poptr1|661579  
 AT3G49460,AT5G24510 Poptr1|572464,Poptr1|552351  
 AT5G17410 Poptr1|724343  
 Poptr1|591690  
 AT3G15351 Poptr1|678366,Poptr1|644290  
 AT2G21500,AT4G39140 Poptr1|713044,Poptr1|697255  
 AT1G19680,AT1G75400 Poptr1|715287,Poptr1|342210  
 Poptr1|578869,Poptr1|672976  
 AT3G23980 Poptr1|657349,Poptr1|657347  
 AT3G53580 Poptr1|668083,Poptr1|717427  
 Poptr1|595701  
 AT1G15140 Poptr1|687171,Poptr1|686314  
 AT2G18490,AT2G15740,AT5G42640,AT5G22990,AT4G26030 Poptr1|351060  
 AT1G78140 Poptr1|559114,Poptr1|643750,Poptr1|651292  
 AT2G41040 Poptr1|578828,Poptr1|583638  
 Poptr1|684709,Poptr1|708331  
 AT2G12280,AT2G12200,AT1G50480  
 Poptr1|562279  
 AT2G42510,AT1G54380  
 AT4G04940 Poptr1|685766,Poptr1|99242  
 AT1G48750,AT3G18280  
 AT5G38195,AT5G38180,AT1G66850,AT1G43667,AT2G14846,AT3G57310,AT1G43665,AT1G43666,AT5G38170,AT5  
 G38160,AT3G12545,AT1G64235  
 Poptr1|645317,Poptr1|714059  
 AT1G73780 Poptr1|355543,Poptr1|688442  
 Poptr1|713372  
 AT2G20930 Poptr1|697173  
 AT2G28060 Poptr1|595093,Poptr1|697743  
 AT4G16360 Poptr1|695678,Poptr1|734469  
 AT5G21170Poptr1|683796,Poptr1|558171  
 Poptr1|573105  
 AT2G03130  
 AT3G06040 Poptr1|575168  
 AT1G70190 Poptr1|349714  
 AT4G36420 Poptr1|719607  
 AT4G37660 Poptr1|596743  
 Poptr1|703730  
 AT2G36550,AT2G36540 Poptr1|748458  
 AT4G26190 Poptr1|679315,Poptr1|725378  
 AT3G29760 Poptr1|545958  
 AT3G48190 Poptr1|575166  
 AT4G35930 Poptr1|356853  
 AT2G27190 Poptr1|346754,Poptr1|685415  
 Poptr1|578237  
 AT2G16430 Poptr1|721928,Poptr1|694183  
 Poptr1|557200  
 Poptr1|655607,Poptr1|679003,Poptr1|560800,Poptr1|666469,Poptr1|675421,Poptr1|583952,Poptr1|55651

6

AT3G46120,AT2G18130,AT1G52940,AT4G36350,AT1G56360  
 AT5G34850 Poptr1|690387  
 AT4G18372 Poptr1|575765  
 Poptr1|352638  
 AT4G33120,AT4G33110 Poptr1|688979  
 Poptr1|351171  
 AT4G17520,AT5G47210,AT4G16830 Poptr1|702871,Poptr1|646158,Poptr1|740195,Poptr1|551961  
 AT3G29300 Poptr1|578454  
 AT1G65820 Poptr1|592836,Poptr1|556068  
 Poptr1|648298,Poptr1|653085,Poptr1|576919  
 AT3G09085  
 AT2G37020 Poptr1|689389  
 AT5G66410,AT3G50960 Poptr1|563201  
 AT1G35250,AT1G35290,AT1G68280,AT1G68260 Poptr1|723735  
 AT3G27550 Poptr1|49165  
 AT4G13070 Poptr1|596942  
 AT2G28480 Poptr1|75394  
 AT5G59020  
 AT2G29510 Poptr1|641130,Poptr1|557999  
 AT2G37930,AT5G01030 Poptr1|560848  
 AT4G11820Poptr1|548531,Poptr1|693464,Poptr1|350156  
 Poptr1|647760,Poptr1|670959,Poptr1|670960  
 Poptr1|545324,Poptr1|565382,Poptr1|565385,Poptr1|354997,Poptr1|670961,Poptr1|647761,Poptr1|54532

5

AT4G04920  
 AT3G08650 Poptr1|577221  
 Poptr1|545706,Poptr1|580726,Poptr1|680874  
 AT5G08150  
 AT3G30580,AT5G38790 Poptr1|354106  
 AT3G01380 Poptr1|683898

AT1G24450 Poptr1|575135,Poptr1|699429  
Poptr1|571543,Poptr1|571542,Poptr1|567993,Poptr1|571546  
AT5G36140 Poptr1|104086  
Poptr1|736629,Poptr1|578977,Poptr1|563379,Poptr1|560762,Poptr1|99227  
Poptr1|103194,Poptr1|567992,Poptr1|547582,Poptr1|547583,Poptr1|547584  
Poptr1|597593,Poptr1|586866,Poptr1|107084,Poptr1|569310  
Poptr1|574115,Poptr1|588180  
Poptr1|559464,Poptr1|559465  
Poptr1|592301,Poptr1|574248  
Poptr1|569124,Poptr1|595108,Poptr1|570407,Poptr1|582998,Poptr1|571544,Poptr1|571541,Poptr1|54483  
1,Poptr1|567997,Poptr1|567996,Poptr1|555344  
AT5G36110,AT5G36130  
Poptr1|578988,Poptr1|578981,Poptr1|578986  
AT1G18470,AT1G73950 Poptr1|569859  
AT1G68820 Poptr1|658947,Poptr1|345238  
AT3G25540,AT1G13580 Poptr1|55301,Poptr1|696597  
Poptr1|689888  
AT3G19260 Poptr1|581512  
AT1G33330  
Poptr1|581061  
AT5G42480 Poptr1|694820  
Poptr1|568579,Poptr1|49372  
AT5G55310,AT5G55300  
Poptr1|680612  
AT4G31490,AT4G31480 Poptr1|583132,Poptr1|745287  
AT5G23670,AT3G48780,AT3G48790 Poptr1|733740,Poptr1|662206  
AT2G44050 Poptr1|654317,Poptr1|585046  
AT5G01800  
AT3G51730 Poptr1|577148,Poptr1|653197  
Poptr1|584608  
AT5G62410,AT3G47460 Poptr1|343541,Poptr1|590177  
AT5G48600 Poptr1|736327  
AT3G28925  
AT2G32760 Poptr1|701769  
AT5G11680Poptr1|683614,Poptr1|684815  
AT5G16350,AT5G12420,AT5G53380,AT5G22490 Poptr1|588834  
Poptr1|549918  
AT3G49210,AT3G49200,AT3G49190 Poptr1|355282  
AT2G43255,AT2G38995,AT5G37300,AT1G72110,AT5G53390  
AT1G54170,AT3G14010 Poptr1|640624,Poptr1|349472  
AT2G43400 Poptr1|741498  
Poptr1|579926,Poptr1|590723  
AT1G55930  
Poptr1|568500,Poptr1|550169  
AT3G13070 Poptr1|65459  
Poptr1|558527  
AT5G65220 Poptr1|718770  
AT5G18830 Poptr1|354883,Poptr1|565705  
Poptr1|48442  
AT1G31830,AT1G31820 Poptr1|557048,Poptr1|556671,Poptr1|646369  
AT3G13620 Poptr1|639662  
AT5G05630  
AT3G19553 Poptr1|697379,Poptr1|705481,Poptr1|642081  
AT5G41820,AT4G24490 Poptr1|561627  
AT5G57510 Poptr1|583140,Poptr1|583137,Poptr1|98424  
AT1G30475,AT1G56200 Poptr1|550250,Poptr1|672191  
AT1G48760 Poptr1|574913,Poptr1|355550  
AT4G20100,AT2G41050 Poptr1|106475,Poptr1|351306,Poptr1|576048  
AT4G36850 Poptr1|53346  
AT1G05370,AT3G22410 Poptr1|564832,Poptr1|55132  
AT2G46915 Poptr1|692327  
AT4G16370  
AT1G09930 Poptr1|342540  
Poptr1|693591  
AT5G53510,AT4G27730,AT5G53520 Poptr1|569595,Poptr1|699564  
AT4G10770 Poptr1|693352  
AT5G55930,AT4G26590 Poptr1|65515,Poptr1|65519  
AT5G64410 Poptr1|686779  
Poptr1|642182,Poptr1|591603,Poptr1|582305,Poptr1|574704  
Poptr1|72153  
Poptr1|560109,Poptr1|701223  
Poptr1|582303,Poptr1|575867,Poptr1|351124  
AT1G08820 Poptr1|729741,Poptr1|595507  
AT3G60600,AT2G45140 Poptr1|591667,Poptr1|59370,Poptr1|552015  
Poptr1|565636  
AT1G51270 Poptr1|677389  
AT2G23830  
AT5G47180 Poptr1|356520,Poptr1|646164  
AT4G00170 Poptr1|552020  
Poptr1|684989,Poptr1|702877  
AT5G46630  
AT4G24550 Poptr1|684460

AT1G60780,AT1G10730 Poptr1|726254,Poptr1|720204  
 Poptr1|702916,Poptr1|580086  
 Poptr1|586547,Poptr1|64628,Poptr1|722678  
 AT5G25265 Poptr1|561941,Poptr1|737293  
 AT5G13500 Poptr1|683554,Poptr1|350881  
 AT2G25260  
 AT1G19530 Poptr1|643108,Poptr1|694779  
 Poptr1|574892  
 AT1G73990 Poptr1|666214,Poptr1|574895,Poptr1|574894  
 AT1G18850 Poptr1|581352  
 Poptr1|545849,Poptr1|667101  
 Poptr1|573093  
 AT3G07740  
 Poptr1|667099  
 AT4G16420 Poptr1|734490,Poptr1|695644  
 AT5G24690 Poptr1|548754,Poptr1|709698,Poptr1|693797  
 AT1G16640,AT5G57720,AT3G06220,AT3G06160,AT4G34400,AT3G53310,AT5G66980 Poptr1|76197  
 AT2G42450 Poptr1|346865,Poptr1|694750  
 Poptr1|97748  
 AT3G05480 Poptr1|699735  
 Poptr1|578729,Poptr1|561345  
 AT5G57910,AT4G30630 Poptr1|353027  
 Poptr1|349789  
 AT4G17540  
 AT1G49975 Poptr1|557532,Poptr1|550022  
 AT4G22190 Poptr1|102325,Poptr1|679725,Poptr1|584725,Poptr1|568095  
 AT2G33100 Poptr1|48556,Poptr1|350683  
 AT4G24000,AT4G24010,AT4G23990 Poptr1|554513,Poptr1|350372,Poptr1|705526,Poptr1|350373  
 AT5G16910,AT3G03050 Poptr1|573858,Poptr1|703843  
 Poptr1|554065,Poptr1|590064  
 AT5G05170 Poptr1|691465,Poptr1|697507  
 AT5G44030 Poptr1|691997  
 Poptr1|97727,Poptr1|56570  
 Poptr1|554512,Poptr1|572992,Poptr1|583563  
 Poptr1|698018  
 Poptr1|343986,Poptr1|560094  
 AT4G38190 Poptr1|595034  
 AT1G02730 Poptr1|552489,Poptr1|700418  
 Poptr1|597629  
 AT2G32540,AT2G32530,AT2G32610,AT2G32620,AT4G15320,AT4G15290 Poptr1|572982,Poptr1|684214  
 AT5G17420 Poptr1|717646,Poptr1|578717  
 AT4G32410,AT2G25540 Poptr1|344723,Poptr1|582479,Poptr1|702007  
 Poptr1|569380,Poptr1|593051,Poptr1|640907  
 AT4G18780 Poptr1|568682,Poptr1|555650  
 AT5G64740,AT5G09870,AT2G21770,AT4G39350 Poptr1|71761,Poptr1|695949  
 Poptr1|569277,Poptr1|550454  
 Poptr1|576348,Poptr1|560520  
 AT1G32180  
 Poptr1|714760,Poptr1|551308  
 AT1G55850 Poptr1|550222  
 AT5G23310  
 AT4G25100  
 Poptr1|583707,Poptr1|71779  
 AT5G51100Poptr1|570401,Poptr1|588188,Poptr1|575503  
 AT2G16500,AT4G34710 Poptr1|713160  
 AT4G38890 Poptr1|648710,Poptr1|697222  
 AT2G33570 Poptr1|715738  
 AT5G48190,AT3G60990,AT3G07380,AT4G20170,AT5G44670 Poptr1|712648,Poptr1|63271  
 AT3G03490,AT5G17550 Poptr1|589861,Poptr1|646108  
 AT4G24370 Poptr1|563403  
 AT5G50320 Poptr1|345988,Poptr1|57647  
 AT2G02150 Poptr1|564748  
 AT5G15910 Poptr1|545675  
 Poptr1|595815,Poptr1|353062,Poptr1|353070,Poptr1|353072,Poptr1|585180,Poptr1|353064  
 AT5G10730 Poptr1|737479,Poptr1|344787  
 AT1G32220 Poptr1|346265  
 AT5G42146 Poptr1|556588,Poptr1|557129,Poptr1|642956  
 AT2G40435,AT3G56220  
 Poptr1|560973,Poptr1|701668  
 Poptr1|574509,Poptr1|571871  
 AT1G29270 Poptr1|555643  
 AT1G68020 Poptr1|726767,Poptr1|656997  
 AT1G06410 Poptr1|545143,Poptr1|568670  
 AT2G18700 Poptr1|561404,Poptr1|58723  
 AT1G23870,AT1G70290,AT1G60140 Poptr1|57591,Poptr1|345933  
 Poptr1|107731  
 AT1G17000,AT1G16980,AT4G27550  
 AT1G78580 Poptr1|704920  
 AT4G17770 Poptr1|739953,Poptr1|343481  
 Poptr1|545108  
 AT5G55900,AT4G26620 Poptr1|583351,Poptr1|684043  
 AT3G27570,AT5G40510 Poptr1|706790

AT5G55610 Poptr1|642292  
Poptr1|699136  
AT4G27160,AT4G27150,AT4G27170,AT4G27140,AT5G54740 Poptr1|699137  
AT3G03776 Poptr1|62995  
Poptr1|558803  
AT3G51020,AT5G66370 Poptr1|346596  
Poptr1|590793  
AT3G19990 Poptr1|563393  
Poptr1|556129,Poptr1|586997  
AT4G36770  
Poptr1|679295  
Poptr1|557092,Poptr1|584786  
Poptr1|576038,Poptr1|734607,Poptr1|575988  
Poptr1|586619  
Poptr1|576026  
Poptr1|724363  
Poptr1|591628  
Poptr1|560251  
Poptr1|584666,Poptr1|592441,Poptr1|555563  
Poptr1|576013  
AT1G05530,AT1G05560,AT4G15550  
Poptr1|576324,Poptr1|344164,Poptr1|645347,Poptr1|645348,Poptr1|593295,Poptr1|572884  
Poptr1|575973,Poptr1|654361,Poptr1|560123  
AT5G65550  
Poptr1|585905,Poptr1|591150,Poptr1|551831  
Poptr1|582127  
AT5G17040,AT5G17030,AT5G17050,AT1G30530 Poptr1|56863,Poptr1|571764,Poptr1|592179  
Poptr1|98857,Poptr1|545507  
Poptr1|576033,Poptr1|62996  
Poptr1|595283,Poptr1|65206  
Poptr1|581655  
Poptr1|592942  
AT5G12890 Poptr1|547900,Poptr1|639901  
Poptr1|576000,Poptr1|585707,Poptr1|562352  
AT2G26480  
AT2G36770,AT2G36780,AT2G36760,AT2G36800,AT2G36790,AT2G36750,AT3G53160  
Poptr1|107132,Poptr1|573177,Poptr1|577047  
Poptr1|56583  
Poptr1|582789  
Poptr1|558003  
Poptr1|560255  
AT5G59590,AT5G59580,AT3G46650,AT3G46680,AT3G46720,AT3G46690,AT3G46700,AT3G46670,AT3G46660,AT5G37950,AT5G38010,AT5G38040 Poptr1|54725,Poptr1|549119  
Poptr1|576029  
Poptr1|569437  
Poptr1|576032,Poptr1|544951  
Poptr1|560946  
AT5G49690 Poptr1|343844  
Poptr1|576037  
Poptr1|585831  
Poptr1|597700  
Poptr1|576873,Poptr1|576872,Poptr1|656173  
Poptr1|344097  
AT2G31790,AT1G05680,AT2G31750  
Poptr1|595172  
Poptr1|580587,Poptr1|594083,Poptr1|560125,Poptr1|567809,Poptr1|586456,Poptr1|579637  
Poptr1|595660,Poptr1|59419  
AT1G51210,AT5G03490 Poptr1|566744  
Poptr1|590098,Poptr1|646335,Poptr1|590097  
Poptr1|641531  
Poptr1|573623  
AT3G55710,AT3G55700 Poptr1|567337,Poptr1|579636,Poptr1|567335,Poptr1|579638,Poptr1|567336  
AT3G22250  
AT4G15270 Poptr1|576027  
Poptr1|355505  
Poptr1|572296,Poptr1|692392,Poptr1|58295  
Poptr1|580585,Poptr1|580586,Poptr1|661415  
Poptr1|586090,Poptr1|557418,Poptr1|560147,Poptr1|590426  
AT2G23210,AT2G23250,AT2G23260 Poptr1|587034  
Poptr1|557417  
Poptr1|588896  
AT3G16520  
Poptr1|647762,Poptr1|593265,Poptr1|102208,Poptr1|678842,Poptr1|592940,Poptr1|678615,Poptr1|55556  
2,Poptr1|555559,Poptr1|648281  
Poptr1|573178  
Poptr1|576016  
Poptr1|575970,Poptr1|575969,Poptr1|575957,Poptr1|575953,Poptr1|575952,Poptr1|575956,Poptr1|70545  
9,Poptr1|560148  
Poptr1|65211,Poptr1|54516,Poptr1|586382,Poptr1|103526  
Poptr1|553506,Poptr1|576035  
AT2G29750,AT2G29740,AT1G07260,AT1G07250,AT1G07240 Poptr1|557941  
AT2G28080 Poptr1|584434,Poptr1|54835

AT2G30150,AT2G30140 Poptr1|706639,Poptr1|557619,Poptr1|706632,Poptr1|557616,Poptr1|557617  
Poptr1|562129,Poptr1|591074,Poptr1|585760,Poptr1|562134,Poptr1|556682,Poptr1|103429,Poptr1|10343  
1,Poptr1|102627  
AT4G34131,AT4G34135,AT4G34138,AT2G15490,AT2G15480  
Poptr1|595175,Poptr1|49292,Poptr1|557412,Poptr1|580281,Poptr1|572238  
Poptr1|563105  
Poptr1|107679,Poptr1|568373,Poptr1|76257  
AT1G01420,AT1G01390,AT4G01070 Poptr1|711256,Poptr1|731284,Poptr1|731282,Poptr1|554472  
Poptr1|65116,Poptr1|579477  
AT2G16890,AT5G14860 Poptr1|64773  
Poptr1|593304,Poptr1|597480  
AT1G10400 Poptr1|668360,Poptr1|557419  
Poptr1|557973  
Poptr1|560259  
AT2G36970  
Poptr1|594798  
AT4G15500,AT4G15490,AT3G21560,AT4G15480 Poptr1|54529,Poptr1|557446  
AT1G06000  
Poptr1|597440  
Poptr1|593494  
Poptr1|588758  
AT3G02100 Poptr1|546621,Poptr1|556409  
Poptr1|545929  
Poptr1|556680  
Poptr1|353284,Poptr1|567974,Poptr1|353285  
Poptr1|560466,Poptr1|560477,Poptr1|576370  
AT1G24100 Poptr1|575116  
Poptr1|588237  
AT3G53150 Poptr1|59191  
AT1G64910,AT1G64920,AT5G53990,AT4G09500,AT2G22930,AT5G54010,AT4G27570,AT4G27560,AT1G50580,AT3  
G29630,AT5G54060 Poptr1|574370,Poptr1|594413,Poptr1|99951  
AT4G14090  
AT5G05900,AT5G05880,AT5G05890,AT5G05860,AT5G05870,AT3G11340  
AT1G73880 Poptr1|569924  
AT1G22380,AT1G22360,AT1G22400,AT1G22340,AT1G22370,AT1G78270  
Poptr1|57878,Poptr1|592440,Poptr1|584104,Poptr1|57880,Poptr1|560250,Poptr1|560247,Poptr1|344037,  
Poptr1|576015,Poptr1|576021,Poptr1|579523,Poptr1|560258,Poptr1|57877,Poptr1|713259,Poptr1|560265,Poptr1|576  
034,Poptr1|576028,Poptr1|576018,Poptr1|576025,Poptr1|576030,Poptr1|53070,Poptr1|560263,Poptr1|577393,Poptr1|  
668364,Poptr1|104991,Poptr1|49270,Poptr1|707232,Poptr1|342489,Poptr1|347400,Poptr1|577046,Poptr1|577045  
Poptr1|576031  
Poptr1|64702,Poptr1|349336,Poptr1|590486  
Poptr1|105405,Poptr1|715869,Poptr1|576020,Poptr1|589092,Poptr1|577390,Poptr1|577392,Poptr1|58655  
8,Poptr1|58309,Poptr1|577394,Poptr1|577395,Poptr1|562577,Poptr1|596294,Poptr1|75706  
AT4G15260,AT4G15280,AT3G21790,AT3G21800,AT3G21780,AT3G21760,AT3G21750  
Poptr1|575975,Poptr1|575981,Poptr1|575979,Poptr1|575980,Poptr1|575972,Poptr1|575974,Poptr1|57597  
7,Poptr1|560122,Poptr1|560127,Poptr1|575978,Poptr1|560126,Poptr1|343997,Poptr1|575971,Poptr1|560124,Poptr1|5  
60121,Poptr1|670180,Poptr1|104164,Poptr1|575976,Poptr1|593730,Poptr1|585386,Poptr1|586091,Poptr1|579805,Pop  
ptr1|560119  
Poptr1|726527  
Poptr1|574348  
Poptr1|593123,Poptr1|103532  
AT2G29710,AT2G29730  
Poptr1|574411  
Poptr1|557618  
Poptr1|595173  
Poptr1|583121,Poptr1|583123,Poptr1|583124,Poptr1|578369,Poptr1|595579  
AT5G66690,AT5G26310,AT3G50740  
AT2G43840,AT2G43820 Poptr1|562353,Poptr1|582116,Poptr1|562130,Poptr1|718172  
AT2G18570,AT2G18560 Poptr1|563104,Poptr1|563110,Poptr1|563103,Poptr1|563102  
Poptr1|352384  
Poptr1|577583,Poptr1|577578,Poptr1|597599,Poptr1|577576,Poptr1|577580,Poptr1|102300  
AT2G22590 Poptr1|48497,Poptr1|579010,Poptr1|569453,Poptr1|597503  
AT1G77350 Poptr1|581031  
Poptr1|639836,Poptr1|647295  
AT2G11890Poptr1|98744,Poptr1|702282  
AT1G53900,AT1G53880,AT1G72340 Poptr1|646050,Poptr1|584158  
AT1G53870,AT1G53890,AT3G14260,AT1G63410  
AT3G55400 Poptr1|687363  
Poptr1|108347  
AT5G14370  
AT4G25990,AT5G57180 Poptr1|560663,Poptr1|579030  
Poptr1|691528  
AT1G57540 Poptr1|581601  
AT4G31080 Poptr1|591439,Poptr1|583212,Poptr1|677988  
AT2G24330,AT4G31090  
Poptr1|568474  
AT4G37800,AT5G65730 Poptr1|655512  
Poptr1|568475  
AT3G44990  
AT4G28850 Poptr1|584043  
AT2G14620 Poptr1|557559  
Poptr1|640150,Poptr1|712151



AT4G18990  
AT5G13870 Poptr1|732010  
AT3G23730,AT4G14130 Poptr1|711462,Poptr1|572886  
Poptr1|559468,Poptr1|584844,Poptr1|714863,Poptr1|342333  
AT1G32170 Poptr1|646298,Poptr1|590065  
AT5G57540,AT5G57530,AT4G25820 Poptr1|99605  
AT4G13080,AT4G13090,AT3G25050 Poptr1|343156  
AT4G25810,AT5G57560,AT4G30270,AT4G30280,AT1G65310,AT4G30290,AT5G48070,AT2G18800  
Poptr1|582987,Poptr1|594976  
AT5G57550 Poptr1|737800,Poptr1|737795,Poptr1|570685,Poptr1|60567,Poptr1|351629  
AT1G11545Poptr1|555366,Poptr1|55748  
AT2G36870 Poptr1|576796,Poptr1|589488  
Poptr1|555810  
AT2G01850,AT1G14720 Poptr1|720800,Poptr1|658681  
AT4G03210 Poptr1|571855,Poptr1|574524  
AT3G48580  
Poptr1|54265  
Poptr1|686936  
AT2G06850  
AT1G10550 Poptr1|731609  
Poptr1|552110  
AT1G31870 Poptr1|589962,Poptr1|743199  
AT1G32700,AT4G17900  
AT3G60670 Poptr1|552021,Poptr1|591671  
AT2G17785,AT1G31040 Poptr1|71934  
AT1G43000  
Poptr1|646252,Poptr1|590018,Poptr1|663281,Poptr1|738386  
AT2G27930 Poptr1|548734,Poptr1|589527  
Poptr1|583639  
Poptr1|356453,Poptr1|349720  
AT2G12646  
AT5G46710  
AT1G21000,AT1G76590 Poptr1|684696,Poptr1|685484  
Poptr1|566415,Poptr1|354321  
Poptr1|572772  
AT4G03090 Poptr1|572773,Poptr1|552638  
AT3G21350 Poptr1|690509  
AT1G30470  
AT2G28360,AT1G07990 Poptr1|741930  
AT3G45190  
AT5G19280 Poptr1|720257  
AT5G19850 Poptr1|555205  
AT4G36530 Poptr1|679213  
Poptr1|547606  
AT5G20350 Poptr1|578854  
AT2G14255 Poptr1|65345  
Poptr1|578856,Poptr1|98743  
Poptr1|49341  
AT2G14250  
AT3G18270 Poptr1|574933,Poptr1|569797  
Poptr1|697447  
AT1G07110Poptr1|557657,Poptr1|683885  
Poptr1|640598  
AT4G22830  
AT5G02130 Poptr1|710908  
AT4G00770 Poptr1|347911  
Poptr1|554304  
AT4G23020,AT4G11780 Poptr1|350164,Poptr1|548521  
AT1G56345 Poptr1|570720  
Poptr1|102406  
AT1G01290 Poptr1|572402  
AT5G37500  
Poptr1|591183  
AT2G26650 Poptr1|705131,Poptr1|685674  
Poptr1|588851  
AT4G22200 Poptr1|685078  
AT4G18290,AT5G46240 Poptr1|714514  
Poptr1|103080  
AT3G02850 Poptr1|545510,Poptr1|343059  
Poptr1|661341  
AT2G25600,AT4G32500 Poptr1|561851  
Poptr1|570612  
Poptr1|594790  
Poptr1|701980  
AT4G32650  
Poptr1|344691  
AT2G14835 Poptr1|691761,Poptr1|722404  
AT1G10780 Poptr1|553431,Poptr1|63871  
Poptr1|579812,Poptr1|552818,Poptr1|572937  
AT1G05790 Poptr1|572935  
Poptr1|572936  
AT5G05310 Poptr1|676328,Poptr1|738343,Poptr1|665384

AT3G05330 Poptr1|595599,Poptr1|570843  
Poptr1|652291,Poptr1|693052  
AT1G21065 Poptr1|577509,Poptr1|591586,Poptr1|590352,Poptr1|580852,Poptr1|584417,Poptr1|576741,Poptr1|57674  
2,Poptr1|593209,Poptr1|571951,Poptr1|71929,Poptr1|593534,Poptr1|573514,Poptr1|573874,Poptr1|568886  
AT5G28950  
AT4G04635 Poptr1|585004,Poptr1|586177,Poptr1|579738,Poptr1|584835,Poptr1|591209,Poptr1|586101,Poptr1|57678  
8,Poptr1|591324,Poptr1|581092,Poptr1|572327,Poptr1|579265,Poptr1|581802,Poptr1|581350,Poptr1|594374,Poptr1|3  
52393,Poptr1|98350,Poptr1|355081  
AT5G28730,AT1G43722  
AT1G47510 Poptr1|551147,Poptr1|52100  
AT2G01900 Poptr1|566393,Poptr1|354341  
Poptr1|577537  
Poptr1|583582  
AT2G37440  
AT5G04980 Poptr1|563490  
AT1G34120  
AT1G05470,AT2G32010 Poptr1|566215,Poptr1|564861  
Poptr1|355109,Poptr1|580633  
AT4G18010 Poptr1|739892  
AT3G63240  
AT1G71710 Poptr1|347083,Poptr1|559427  
AT5G65090 Poptr1|75745,Poptr1|71664  
Poptr1|579048  
AT5G58980  
AT1G07380 Poptr1|641115,Poptr1|650195,Poptr1|641114,Poptr1|650196,Poptr1|576910  
AT2G38010 Poptr1|73124  
Poptr1|550803,Poptr1|583994  
AT3G16760 Poptr1|565522  
AT2G47320 Poptr1|552545,Poptr1|572598  
AT3G66654 Poptr1|564392  
AT1G65270 Poptr1|702493  
AT1G13560,AT3G25585 Poptr1|698275,Poptr1|720296  
AT1G53760 Poptr1|589826  
AT2G41880,AT3G57550 Poptr1|701373,Poptr1|685792  
AT1G50240 Poptr1|702479  
AT5G02720,AT3G53490  
Poptr1|701496  
AT1G49800 Poptr1|65236,Poptr1|557444  
AT2G28860,AT2G28850,AT2G34500,AT2G34490 Poptr1|545798  
AT3G12345 Poptr1|353472  
AT2G31980 Poptr1|572922,Poptr1|645343  
AT2G03120 Poptr1|649855,Poptr1|706551  
AT1G04300,AT5G43560,AT5G52330  
Poptr1|696372,Poptr1|726390  
AT4G16045  
AT5G12040 Poptr1|685574  
AT5G60650  
AT2G28410 Poptr1|595059  
AT1G29980,AT2G34510 Poptr1|727936  
AT3G08030 Poptr1|549292  
AT5G14150  
AT1G80240 Poptr1|548619  
AT2G41810,AT2G41800 Poptr1|560498,Poptr1|576359,Poptr1|351516  
AT5G11420,AT5G25460,AT4G32460 Poptr1|107375,Poptr1|701999,Poptr1|716738  
AT2G27750,AT5G05210 Poptr1|354632,Poptr1|657330,Poptr1|725970  
AT4G24590,AT5G49710 Poptr1|692623,Poptr1|651212  
AT3G10150 Poptr1|109207,Poptr1|576226  
AT5G47580,AT4G17250 Poptr1|554193,Poptr1|581253,Poptr1|554192,Poptr1|581254  
AT4G08580,AT5G17900 Poptr1|699916,Poptr1|58926  
AT3G53030 Poptr1|589549  
AT4G03175  
AT5G22840,AT3G44850 Poptr1|594855  
AT4G35500,AT2G17530 Poptr1|71901,Poptr1|586007  
AT5G09860 Poptr1|547791,Poptr1|711938  
AT3G09320 Poptr1|576812,Poptr1|344257  
AT5G41060,AT3G26935 Poptr1|60138,Poptr1|707083  
Poptr1|75878  
Poptr1|102953,Poptr1|563708  
AT5G50020,AT4G24630 Poptr1|551299,Poptr1|559406  
AT5G04270 Poptr1|55608  
AT3G48760  
AT3G56920,AT2G40990  
Poptr1|48609,Poptr1|554666  
Poptr1|356104,Poptr1|733718  
AT5G05070 Poptr1|576066,Poptr1|560302  
AT3G18620 Poptr1|562831  
AT3G04970  
AT3G56930 Poptr1|560301

Poptr1|572962  
Poptr1|578713  
AT3G18430 Poptr1|703253  
AT4G27120 Poptr1|571498  
Poptr1|573052,Poptr1|342998  
AT5G47540,AT4G17270 Poptr1|688647,Poptr1|667128,Poptr1|695658  
Poptr1|553704,Poptr1|553707,Poptr1|574101  
AT5G18940 Poptr1|686170,Poptr1|686986  
AT2G03410  
AT4G33210 Poptr1|352605  
AT2G34090 Poptr1|568731  
Poptr1|555245,Poptr1|547645,Poptr1|351627  
Poptr1|571296,Poptr1|595523  
AT5G07610 Poptr1|574803  
Poptr1|596828,Poptr1|698730  
AT1G71990 Poptr1|592257  
Poptr1|696760  
AT1G15710 Poptr1|594039,Poptr1|597623  
AT5G34930 Poptr1|583659  
AT1G42480 Poptr1|694911  
Poptr1|346560  
AT5G18490,AT3G04350  
AT1G04090,AT5G43950 Poptr1|553302,Poptr1|553303,Poptr1|573374  
AT3G01880,AT3G01870  
AT2G44230,AT2G44260 Poptr1|578536,Poptr1|583311  
AT4G24710 Poptr1|728506,Poptr1|575244  
Poptr1|544816  
AT5G03300,AT3G09820 Poptr1|720292,Poptr1|659896  
AT5G06050  
AT4G10440,AT1G33170  
Poptr1|588917  
AT1G26850 Poptr1|687116,Poptr1|696446  
AT1G78240 Poptr1|643774,Poptr1|651268,Poptr1|651269,Poptr1|643775  
AT5G14430 Poptr1|49172  
AT4G00750 Poptr1|552120,Poptr1|688134  
AT1G19430 Poptr1|691992  
AT2G43200 Poptr1|562285  
Poptr1|561055,Poptr1|104781  
AT4G19120  
Poptr1|687771  
AT4G18030 Poptr1|690009,Poptr1|689471  
AT5G64030 Poptr1|718612,Poptr1|51678,Poptr1|651490,Poptr1|643552  
AT2G45750  
Poptr1|714607  
AT1G29470,AT2G34300  
AT2G03480,AT1G13860 Poptr1|566940  
AT1G77260 Poptr1|347200  
Poptr1|642557  
AT3G03370  
AT3G51070 Poptr1|76377,Poptr1|593886  
AT3G23300,AT4G14360,AT1G04430 Poptr1|715193,Poptr1|684610  
AT3G56080  
AT1G31850 Poptr1|676655,Poptr1|693549  
Poptr1|570491  
AT2G40280 Poptr1|594761,Poptr1|724411  
AT4G00740  
AT2G39750 Poptr1|563935,Poptr1|724641  
AT3G10200,AT5G04060 Poptr1|560429  
Poptr1|76376,Poptr1|576517  
Poptr1|555461,Poptr1|569469  
Poptr1|580868,Poptr1|97130,Poptr1|660380,Poptr1|580864,Poptr1|660381,Poptr1|60402,Poptr1|60401,Poptr1|580865,Poptr1|97127  
AT3G51210  
Poptr1|98840,Poptr1|583861  
AT3G45080,AT3G45070,AT2G27570,AT5G43690,AT4G26280,AT1G13430,AT2G14920,AT1G13420,AT1G28170,AT2G03750  
Poptr1|583495,Poptr1|583496,Poptr1|585250,Poptr1|107237,Poptr1|555127,Poptr1|547740,Poptr1|579389,Poptr1|106316,Poptr1|579390,Poptr1|555126,Poptr1|579391,Poptr1|593556,Poptr1|555124,Poptr1|585251,Poptr1|639767,Poptr1|105261,Poptr1|547741  
AT1G18590,AT1G74090,AT1G74100  
AT2G03760,AT2G03770 Poptr1|591509,Poptr1|674399,Poptr1|566759  
Poptr1|350903,Poptr1|595192  
AT5G07000,AT5G07010 Poptr1|350902  
Poptr1|108507  
Poptr1|106459  
Poptr1|580869  
Poptr1|350904,Poptr1|712555  
AT1G67690 Poptr1|565929  
AT4G21460,AT3G18240 Poptr1|574935  
AT1G73770 Poptr1|699529  
AT5G43960 Poptr1|692005,Poptr1|573372  
AT1G13730,AT2G03640 Poptr1|353940,Poptr1|566922

AT3G07250,AT5G48650  
AT5G60980 Poptr1|596417  
AT3G25150 Poptr1|711507  
AT3G55540,AT1G69250  
Poptr1|697897  
AT1G09790 Poptr1|584477  
Poptr1|583846,Poptr1|556388  
AT5G60950  
AT3G10116Poptr1|546174  
Poptr1|569882  
AT5G60920 Poptr1|704291  
Poptr1|581399  
Poptr1|107290  
Poptr1|98821,Poptr1|98822,Poptr1|98820,Poptr1|98819  
AT3G02210,AT3G29810 Poptr1|712852  
AT5G15630 Poptr1|744184  
AT4G01190  
AT1G77740,AT1G21980 Poptr1|684497,Poptr1|559188  
AT2G26420 Poptr1|573531,Poptr1|573532,Poptr1|582189  
Poptr1|579946  
AT3G09920 Poptr1|689403  
Poptr1|572338  
AT3G07960 Poptr1|547812,Poptr1|350878  
Poptr1|556576  
AT1G10900,AT1G60890 Poptr1|712242,Poptr1|548747  
AT3G56960,AT2G41210 Poptr1|57925  
Poptr1|579944  
Poptr1|572339  
AT1G01460  
AT2G25530 Poptr1|561878  
AT1G63610 Poptr1|693022,Poptr1|694899  
AT5G19190,AT3G06070 Poptr1|696250  
AT3G04560 Poptr1|687979  
AT2G20142 Poptr1|353050,Poptr1|105572,Poptr1|62719,Poptr1|108171  
AT2G16360 Poptr1|655765  
Poptr1|648626,Poptr1|649390,Poptr1|725419  
Poptr1|595961  
AT2G21580,AT4G39200,AT4G34555  
AT5G47435,AT4G17360 Poptr1|589874,Poptr1|646120  
Poptr1|584946  
AT1G63270 Poptr1|669616  
AT4G25450 Poptr1|575755  
AT5G39040 Poptr1|701875  
Poptr1|587750  
Poptr1|105166  
Poptr1|581405,Poptr1|581407,Poptr1|97453,Poptr1|581404  
Poptr1|588280  
Poptr1|583978  
Poptr1|62070,Poptr1|105082  
Poptr1|107861  
Poptr1|578534  
AT3G55320,AT2G39480 Poptr1|353501,Poptr1|687367  
AT2G36910 Poptr1|589477  
Poptr1|589037,Poptr1|103242  
AT3G28860 Poptr1|736283  
AT4G18050,AT5G46540 Poptr1|100357  
Poptr1|107876  
Poptr1|590871  
AT1G70610 Poptr1|697975  
Poptr1|594382  
Poptr1|667946  
Poptr1|586891  
Poptr1|590264  
AT3G28360,AT3G28390,AT3G28380,AT3G28415,AT3G28345  
Poptr1|579021,Poptr1|560655,Poptr1|58816,Poptr1|560653  
AT5G03910 Poptr1|695172  
Poptr1|587399  
Poptr1|595179,Poptr1|545890,Poptr1|108435  
Poptr1|592466  
Poptr1|677099  
Poptr1|652824,Poptr1|702316  
Poptr1|569080,Poptr1|571482  
Poptr1|577962,Poptr1|570517  
Poptr1|108822  
Poptr1|725562  
Poptr1|583337  
Poptr1|579022,Poptr1|579563  
AT5G14100 Poptr1|597142  
Poptr1|583782  
Poptr1|549722,Poptr1|583783,Poptr1|104252  
Poptr1|575754  
Poptr1|351635,Poptr1|572533

Poptr1|596669  
Poptr1|584139  
Poptr1|586845,Poptr1|105312  
AT4G01820,AT4G01830,AT1G02530,AT1G02520,AT2G47000,AT3G62150  
Poptr1|711431,Poptr1|688227,Poptr1|572531,Poptr1|692225,Poptr1|572530  
Poptr1|676925,Poptr1|581277  
AT5G58270 Poptr1|571941,Poptr1|738973  
AT1G67940  
AT4G28630,AT4G28620  
AT4G25960,AT1G10680 Poptr1|346253,Poptr1|343480,Poptr1|590034  
Poptr1|583241  
Poptr1|355455,Poptr1|574609  
Poptr1|109033  
AT1G28010,AT1G27940 Poptr1|346672  
AT1G65410 Poptr1|572789,Poptr1|704955  
Poptr1|577963  
AT4G33460 Poptr1|71517  
Poptr1|71722,Poptr1|562697  
AT5G10010  
AT5G64910  
AT5G10480 Poptr1|719769  
AT5G59770 Poptr1|549211  
AT3G57290 Poptr1|667362,Poptr1|652677  
AT5G06910,AT3G12170 Poptr1|583602,Poptr1|734961  
Poptr1|573366,Poptr1|553311,Poptr1|586120  
Poptr1|546271  
AT3G04380 Poptr1|571112  
Poptr1|72913  
AT5G43990,AT1G04050  
AT5G42470 Poptr1|685439,Poptr1|550881  
AT3G21055,AT1G51400 Poptr1|549240,Poptr1|650065  
Poptr1|639863,Poptr1|554997  
AT1G13750 Poptr1|564300,Poptr1|698368  
AT5G50400,AT4G24890 Poptr1|570253  
AT1G13760 Poptr1|547853,Poptr1|564277  
AT1G13900,AT2G03450 Poptr1|566952  
Poptr1|586524,Poptr1|587540  
AT3G07930 Poptr1|661396  
AT1G66050,AT1G66040,AT5G39550,AT1G57800,AT1G57820,AT4G08590  
Poptr1|63211,Poptr1|693282  
Poptr1|108583  
AT1G76050 Poptr1|559885,Poptr1|642899  
AT5G07590 Poptr1|675651,Poptr1|640226  
AT4G12790 Poptr1|573169  
Poptr1|346334  
Poptr1|578019  
AT4G35800  
Poptr1|593586  
AT5G60040 Poptr1|49175  
AT3G57660 Poptr1|576328,Poptr1|351564  
AT4G30230 Poptr1|353417,Poptr1|353421,Poptr1|96877  
AT1G73030,AT1G17730 Poptr1|548967,Poptr1|691317,Poptr1|712050  
AT2G26470 Poptr1|553242  
AT3G22300 Poptr1|75936  
AT4G24200 Poptr1|559850,Poptr1|550864  
AT3G12650 Poptr1|557756  
Poptr1|582159,Poptr1|582157  
AT2G40980 Poptr1|564170,Poptr1|724232  
AT1G08370  
Poptr1|561466,Poptr1|701467  
AT2G38695 Poptr1|350935  
AT4G16070 Poptr1|697801,Poptr1|689871  
Poptr1|592239  
AT3G14075 Poptr1|693757  
Poptr1|355044,Poptr1|345637  
AT2G38280 Poptr1|688838,Poptr1|560928  
AT1G76250 Poptr1|570495,Poptr1|559929,Poptr1|592097,Poptr1|550785,Poptr1|553964  
AT3G08800 Poptr1|577084  
AT3G51100Poptr1|655407,Poptr1|679180  
AT1G74220  
AT5G15560,AT1G69280  
Poptr1|355626  
AT2G03630 Poptr1|353936  
AT3G02125 Poptr1|545865  
AT5G22430  
AT2G27385 Poptr1|697698  
Poptr1|562179,Poptr1|644326  
AT5G62300,AT3G45030,AT3G47370 Poptr1|570581,Poptr1|701132  
AT4G17740 Poptr1|565846  
Poptr1|652765  
AT3G57680  
Poptr1|354641

Poptr1|680311,Poptr1|570976  
AT1G54500  
AT1G69980 Poptr1|565211,Poptr1|658353  
AT1G48850 Poptr1|724973,Poptr1|655918  
AT5G01310 Poptr1|577008  
AT4G12120  
AT1G02010 Poptr1|572105  
AT1G12360 Poptr1|712321,Poptr1|704232  
AT4G26220 Poptr1|704601  
AT4G34050 Poptr1|691730,Poptr1|722225  
AT1G67990,AT1G67980,AT1G24735 Poptr1|55191,Poptr1|564687,Poptr1|582675  
AT3G62000,AT3G61990 Poptr1|348200  
AT1G75980 Poptr1|652125,Poptr1|692994  
AT2G05910,AT5G20640 Poptr1|573099,Poptr1|589298  
Poptr1|688437  
AT2G03800  
AT1G63980 Poptr1|554418  
Poptr1|587351  
AT5G06580 Poptr1|667560,Poptr1|576445,Poptr1|576442  
Poptr1|585008  
Poptr1|561192  
AT5G16260  
Poptr1|564123  
AT5G11040Poptr1|669120,Poptr1|654201  
Poptr1|654198,Poptr1|669117  
Poptr1|654199  
Poptr1|654200,Poptr1|669119  
Poptr1|669118  
AT5G57040 Poptr1|668789  
Poptr1|355845  
AT1G27520 Poptr1|355846,Poptr1|575111  
AT5G43710 Poptr1|720944  
AT1G12300,AT1G12620,AT1G12775,AT3G22470,AT1G12700,AT1G63630,AT1G63230,AT1G62860,AT1G64100,AT1  
G63400,AT1G62910,AT1G63150,AT1G62590,AT1G63330,AT1G62930,AT1G63130,AT1G62670,AT1G63070,AT1G63  
080,AT1G62720,AT1G62680,AT5G16640,AT1G06580,AT1G64580,AT3G16710,AT5G41170,AT4G26800,AT2G16880  
AT1G18900,AT1G74750  
AT3G13150  
AT4G16390 Poptr1|560214,Poptr1|652442,Poptr1|688640  
AT2G17670 Poptr1|558801  
AT3G06920  
AT5G42310 Poptr1|73145,Poptr1|346590  
AT1G06270 Poptr1|579854  
Poptr1|354380  
AT3G56030,AT2G40240  
AT5G27270  
Poptr1|561791  
AT5G64320 Poptr1|560193  
AT3G53170 Poptr1|557802  
Poptr1|696476  
AT1G19525  
AT5G50280 Poptr1|662085  
Poptr1|97560  
Poptr1|572581,Poptr1|662498,Poptr1|60724,Poptr1|586790,Poptr1|652441,Poptr1|562855,Poptr1|591531,  
Poptr1|576069,Poptr1|58515,Poptr1|594495,Poptr1|571828,Poptr1|571830,Poptr1|562052,Poptr1|103332,Poptr1|561  
788,Poptr1|561789,Poptr1|583789,Poptr1|556096,Poptr1|581077,Poptr1|573736,Poptr1|583791,Poptr1|581161,Poptr  
1|104589,Poptr1|570961,Poptr1|570945,Poptr1|570963,Poptr1|570962,Poptr1|595489,Poptr1|595494,Poptr1|595506,  
Poptr1|595455,Poptr1|595453,Poptr1|595495,Poptr1|595490,Poptr1|595479,Poptr1|595553  
AT3G60050,AT1G55630 Poptr1|104472,Poptr1|575821,Poptr1|346078  
AT5G24830 Poptr1|705018  
Poptr1|594491  
Poptr1|572467  
AT1G07740 Poptr1|100696,Poptr1|554980  
AT3G62540,AT5G14820,AT3G62470 Poptr1|354823,Poptr1|664359  
AT1G13800,AT2G26790  
Poptr1|577179  
AT1G79490 Poptr1|659351  
AT1G80150 Poptr1|63690,Poptr1|349476  
AT2G41720 Poptr1|560491  
AT5G55840 Poptr1|550219  
AT5G18475 Poptr1|551635  
AT1G09820 Poptr1|581958  
AT2G17033  
AT3G18110Poptr1|594473,Poptr1|562281  
AT5G02860 Poptr1|65260  
Poptr1|106291,Poptr1|578147  
AT1G52620 Poptr1|356657  
Poptr1|558446  
AT3G16010 Poptr1|640705  
Poptr1|553549  
Poptr1|550163  
AT2G38420 Poptr1|351968  
AT3G22670 Poptr1|566211,Poptr1|566212

AT3G53700 Poptr1|555301  
AT1G11900Poptr1|549371  
AT1G30290  
AT2G28050 Poptr1|698297  
AT4G39620 Poptr1|71704  
Poptr1|549588  
AT1G77405 Poptr1|348017  
Poptr1|583530  
Poptr1|560213  
Poptr1|71849  
Poptr1|561611  
AT4G26680 Poptr1|573090  
AT2G01740  
AT1G20300 Poptr1|73096  
Poptr1|580399  
AT5G43820 Poptr1|73116  
AT5G59900 Poptr1|64421  
Poptr1|701974  
AT5G16420 Poptr1|569480  
AT2G39230,AT3G54980 Poptr1|561860  
AT5G04810 Poptr1|563546  
AT1G22960  
Poptr1|579046  
AT5G40400  
AT5G62370 Poptr1|556821,Poptr1|594959  
AT1G19290 Poptr1|59427  
AT2G06000 Poptr1|589286  
Poptr1|582795,Poptr1|552917,Poptr1|586829,Poptr1|588321,Poptr1|571826  
AT1G11710Poptr1|568019  
AT4G01570 Poptr1|552386,Poptr1|552388,Poptr1|582461  
AT4G34830  
AT3G16890 Poptr1|564419  
Poptr1|550328  
AT2G18520,AT4G36680 Poptr1|356995,Poptr1|53362  
Poptr1|594065,Poptr1|59545  
Poptr1|555446  
AT5G15010 Poptr1|571164,Poptr1|571163  
AT1G01970 Poptr1|572116  
AT5G14770  
AT3G09650  
AT1G03560  
AT3G29290 Poptr1|577715  
AT5G39710 Poptr1|54492  
AT5G13770 Poptr1|564741  
AT5G28460,AT3G61520,AT5G28370 Poptr1|572312  
AT1G79540 Poptr1|652706  
Poptr1|582777,Poptr1|595555  
Poptr1|666857  
AT2G01390 Poptr1|346431  
Poptr1|595492  
AT1G80550 Poptr1|558946  
Poptr1|591735  
AT1G79080 Poptr1|727210,Poptr1|642585  
AT3G06430 Poptr1|656557  
AT5G46100 Poptr1|580949  
AT3G48810 Poptr1|566866  
AT5G65820 Poptr1|348133  
AT1G09680 Poptr1|552934  
AT5G25630  
AT1G66345 Poptr1|545424  
AT3G25210 Poptr1|645468  
AT3G49240 Poptr1|355295  
AT5G21222 Poptr1|702129  
AT5G06400 Poptr1|352166,Poptr1|594093  
AT5G11310Poptr1|352857  
AT2G32630  
AT5G15280 Poptr1|58396  
Poptr1|107832,Poptr1|586938  
AT3G46610 Poptr1|577492  
Poptr1|555365  
AT1G73400 Poptr1|566357  
Poptr1|662499  
AT4G34820  
AT3G14580  
AT4G31850 Poptr1|561997  
AT1G71210  
Poptr1|664332  
AT1G02420 Poptr1|562729  
AT5G18950  
AT3G18020 Poptr1|574996  
AT1G05670 Poptr1|565409  
AT2G15980 Poptr1|557306,Poptr1|556421

AT2G18940 Poptr1|580506  
AT2G36240 Poptr1|344176  
Poptr1|354375,Poptr1|558739,Poptr1|354234,Poptr1|107717  
Poptr1|552984  
Poptr1|566355  
Poptr1|346882  
Poptr1|348381  
Poptr1|352811  
AT5G14080 Poptr1|549727,Poptr1|579545  
AT5G46580 Poptr1|580097  
AT5G38730 Poptr1|97050  
AT1G77360 Poptr1|651465  
Poptr1|715225,Poptr1|346812  
AT3G23020 Poptr1|354538,Poptr1|566158  
AT5G46680 Poptr1|343994  
AT4G21170  
AT2G35130 Poptr1|101821  
AT1G74850 Poptr1|570029,Poptr1|700893  
AT1G09900 Poptr1|643923  
AT2G31400 Poptr1|692254  
Poptr1|64526  
AT1G19520 Poptr1|106678  
AT1G12670 Poptr1|353158  
AT1G26500 Poptr1|576654  
AT5G61990 Poptr1|575451  
AT1G13040 Poptr1|594148,Poptr1|565140  
Poptr1|352813  
AT1G53330  
AT5G61400  
AT2G15630 Poptr1|557319,Poptr1|60520  
AT1G52640 Poptr1|556143  
AT1G76280  
AT1G05600 Poptr1|348160  
AT1G31840  
AT1G10270 Poptr1|98635  
Poptr1|590038  
Poptr1|58698,Poptr1|597591  
AT5G60960 Poptr1|552918  
AT3G15200 Poptr1|568856  
AT4G30825 Poptr1|560101  
Poptr1|552329  
Poptr1|356599  
AT4G11690Poptr1|552933  
Poptr1|558673  
AT1G08610 Poptr1|58856  
AT3G09060 Poptr1|576926  
AT1G74900 Poptr1|575099  
AT1G61870,AT1G11630 Poptr1|555346,Poptr1|567991  
AT1G80880 Poptr1|587200  
AT1G02060 Poptr1|740126  
AT2G17525 Poptr1|71904  
AT5G48730 Poptr1|348982,Poptr1|553179  
AT1G77340,AT5G65560 Poptr1|589471  
AT3G04130 Poptr1|354693  
AT2G19280  
AT3G61360 Poptr1|590122  
AT1G10910 Poptr1|553427,Poptr1|48846  
AT1G13630 Poptr1|566746  
AT5G61370 Poptr1|355753  
AT1G73710 Poptr1|571775  
AT3G07290  
AT5G12100 Poptr1|660070  
AT5G01110Poptr1|579408,Poptr1|641463  
AT4G20740 Poptr1|343864  
AT4G14190  
Poptr1|694202  
AT4G28010  
Poptr1|594128,Poptr1|353807  
AT2G01360  
AT1G71060 Poptr1|566519  
Poptr1|589470  
AT3G17370  
Poptr1|352815  
AT4G38150 Poptr1|679994  
AT3G13160,AT1G55890 Poptr1|568378,Poptr1|727768,Poptr1|647668  
AT3G42560  
AT1G06710 Poptr1|562284  
AT2G37230 Poptr1|698030  
Poptr1|557683,Poptr1|559656,Poptr1|562881  
AT2G27800  
AT5G47360 Poptr1|589891  
AT4G20090 Poptr1|554608,Poptr1|548182



AT1G63320 Poptr1|583437  
 AT2G17140 Poptr1|595001  
 AT1G74580  
 AT5G39980 Poptr1|58353  
 AT3G59040 Poptr1|64210  
 AT2G48000  
 AT2G30780 Poptr1|735892  
 Poptr1|353997  
 AT1G51965  
 AT4G19440 Poptr1|350013  
 AT3G04760 Poptr1|573722,Poptr1|571099  
 AT5G18390 Poptr1|573784  
 AT3G27050 Poptr1|641818  
 AT4G02430,AT1G02840 Poptr1|664446,Poptr1|552437  
 AT3G49430 Poptr1|569616,Poptr1|732749  
 AT1G09140 Poptr1|581887,Poptr1|570781  
 AT5G17590 Poptr1|595293  
 AT4G30770 Poptr1|558442,Poptr1|562495  
 AT5G20070 Poptr1|653335,Poptr1|98341  
 Poptr1|356308  
 AT5G52030 Poptr1|687867  
 AT5G17690 Poptr1|574027,Poptr1|571324  
 AT5G61500 Poptr1|646403,Poptr1|740021  
 AT1G69680 Poptr1|571132  
 AT4G36190,AT4G36195,AT2G18080 Poptr1|655419,Poptr1|747339,Poptr1|678722  
 AT2G27280,AT2G27285,AT1G55928 Poptr1|594962,Poptr1|648959  
 AT2G33845  
 Poptr1|48138,Poptr1|660899  
 Poptr1|687066,Poptr1|696310  
 AT1G03810,AT4G28440 Poptr1|718224,Poptr1|594643  
 AT1G10590  
 AT1G23750  
 AT3G54670 Poptr1|559701  
 AT2G31440 Poptr1|718353  
 Poptr1|674974,Poptr1|690574,Poptr1|594088  
 AT5G51760 Poptr1|356331  
 AT3G63320 Poptr1|559604  
 AT3G11410Poptr1|720383,Poptr1|567380  
 AT4G11040  
 AT2G29380,AT1G07430,AT5G59220  
 Poptr1|681653,Poptr1|645770  
 Poptr1|577878,Poptr1|675254  
 Poptr1|549127,Poptr1|54733  
 AT5G57050,AT4G26080  
 Poptr1|699589,Poptr1|574799,Poptr1|548344  
 AT1G17550,AT1G72770,AT1G17545 Poptr1|675255,Poptr1|695111,Poptr1|712415  
 AT3G24180 Poptr1|711954  
 AT5G49900 Poptr1|742552,Poptr1|583485  
 Poptr1|702520  
 AT4G10060,AT1G33700  
 AT5G64830 Poptr1|718925  
 AT3G09280 Poptr1|351833  
 Poptr1|574523  
 AT3G47890,AT3G47900  
 AT3G47910 Poptr1|733165,Poptr1|355804,Poptr1|554420  
 Poptr1|579668  
 AT5G15770 Poptr1|587380,Poptr1|578528  
 AT1G15200 Poptr1|595338,Poptr1|691252,Poptr1|349284  
 AT1G71200  
 AT3G56980,AT3G56970,AT2G41240 Poptr1|576175,Poptr1|351398,Poptr1|717415  
 AT5G04150  
 Poptr1|740504  
 AT3G53010  
 AT4G34215 Poptr1|649618,Poptr1|65225  
 Poptr1|703152  
 AT5G45610 Poptr1|356700,Poptr1|349948  
 Poptr1|105926,Poptr1|103879,Poptr1|356702,Poptr1|351119  
 AT1G74290,AT1G74280,AT1G74300,AT2G36290  
 Poptr1|686551,Poptr1|687456,Poptr1|655780,Poptr1|655776,Poptr1|563588  
 AT3G44520  
 AT1G08310  
 AT3G03230,AT3G03240  
 AT3G54240  
 AT3G44510  
 AT3G48410  
 AT5G22460 Poptr1|679941  
 AT1G62780 Poptr1|581217  
 AT3G02500,AT5G16030 Poptr1|670881,Poptr1|648290  
 AT4G37890,AT2G22680,AT5G65683  
 Poptr1|350430,Poptr1|63335  
 AT5G60710 Poptr1|558275  
 AT1G08050

AT3G54780,AT2G38970 Poptr1|344898  
AT5G49665 Poptr1|684451  
AT1G06010 Poptr1|575752,Poptr1|662396  
AT1G14650,AT1G14640,AT5G06890,AT5G12280,AT3G49130,AT5G06520,AT2G43960,AT3G27600,AT4G16200  
Poptr1|51787,Poptr1|558713,Poptr1|562830  
AT5G05200 Poptr1|105822,Poptr1|663462,Poptr1|704221  
AT2G25310,AT4G32130 Poptr1|694974,Poptr1|669094  
AT1G12800 Poptr1|350194  
AT1G23290,AT1G70600,AT1G12960 Poptr1|720999,Poptr1|561158,Poptr1|701442,Poptr1|726230  
AT1G78895,AT1G16830 Poptr1|697043  
AT4G01510,AT1G01020 Poptr1|552376,Poptr1|731478  
AT2G30200 Poptr1|49121,Poptr1|722565  
AT5G48240 Poptr1|700638  
AT3G10670 Poptr1|563506  
AT2G32900 Poptr1|552728  
AT3G62920 Poptr1|572736  
AT1G67910 Poptr1|726220,Poptr1|720351  
AT5G55980,AT3G13227 Poptr1|349046,Poptr1|669299  
AT5G15070,AT3G01310 Poptr1|694093,Poptr1|736216  
AT1G23280 Poptr1|666527,Poptr1|662035  
AT1G76920 Poptr1|551335,Poptr1|559358  
AT1G06060 Poptr1|346757,Poptr1|694808  
Poptr1|349898  
AT4G17910  
AT5G37360 Poptr1|596167,Poptr1|571130,Poptr1|573763  
AT4G09170,AT1G35430 Poptr1|581310,Poptr1|574242  
Poptr1|593237,Poptr1|348864,Poptr1|546484  
AT1G60640  
Poptr1|557542  
AT1G69935 Poptr1|565204  
AT4G33780 Poptr1|65318  
AT2G31060 Poptr1|672331  
AT5G13650 Poptr1|695530  
Poptr1|586550,Poptr1|665842,Poptr1|672330,Poptr1|579407,Poptr1|665843,Poptr1|351541,Poptr1|66744  
3  
AT5G52370,AT5G58990 Poptr1|650201,Poptr1|706064  
AT5G52100 Poptr1|570529,Poptr1|701158  
AT2G20000 Poptr1|689111,Poptr1|100496,Poptr1|577473  
AT3G16320  
AT4G07521  
Poptr1|579238,Poptr1|100107,Poptr1|108725,Poptr1|593700,Poptr1|98292,Poptr1|104560,Poptr1|592995,  
Poptr1|355774,Poptr1|586517,Poptr1|592993,Poptr1|595268,Poptr1|348571,Poptr1|73231,Poptr1|586286,Poptr1|586  
208,Poptr1|587529,Poptr1|577808,Poptr1|591469,Poptr1|591113,Poptr1|592994,Poptr1|583071,Poptr1|72487,Poptr1|  
579157,Poptr1|597523,Poptr1|593436,Poptr1|585133,Poptr1|559029,Poptr1|577807,Poptr1|585693,Poptr1|573513,Pop  
tr1|593682,Poptr1|596309,Poptr1|587958,Poptr1|587528,Poptr1|593425,Poptr1|596264,Poptr1|592778,Poptr1|585  
546,Poptr1|584025,Poptr1|575089,Poptr1|97895,Poptr1|586501,Poptr1|595798,Poptr1|106747,Poptr1|580456,Poptr1|  
585121,Poptr1|104166,Poptr1|584370,Poptr1|586493,Poptr1|106285,Poptr1|349445,Poptr1|104732,Poptr1|100845,Pop  
tr1|100566,Poptr1|552639,Poptr1|106589,Poptr1|588065,Poptr1|103282,Poptr1|569789,Poptr1|98941,Poptr1|583986,Poptr1|558934,  
73,Poptr1|99792,Poptr1|573311,Poptr1|579242,Poptr1|100132,Poptr1|597353,Poptr1|577456,Poptr1|72204,Poptr1|72  
211,Poptr1|586495,Poptr1|593736,Poptr1|593001,Poptr1|581712,Poptr1|590962,Poptr1|591478,Poptr1|103306,Poptr  
1|573309,Poptr1|100326,Poptr1|571566,Poptr1|105805,Poptr1|103282,Poptr1|573300,Poptr1|583986,Poptr1|558934,  
Poptr1|587531,Poptr1|665375,Poptr1|97691,Poptr1|64123,Poptr1|571719,Poptr1|590963,Poptr1|589720,Poptr1|1056  
53,Poptr1|596483,Poptr1|104276,Poptr1|586492,Poptr1|64842,Poptr1|98329,Poptr1|587066,Poptr1|590728,Poptr1|10  
7802,Poptr1|597474,Poptr1|103287,Poptr1|100118,Poptr1|585544,Poptr1|583756,Poptr1|586205,Poptr1|591112,Poptr  
1|586512,Poptr1|597075,Poptr1|587526,Poptr1|592732,Poptr1|580302,Poptr1|579179,Poptr1|591375,Poptr1|108803,  
Poptr1|586203,Poptr1|573306,Poptr1|573370,Poptr1|586510,Poptr1|72206,Poptr1|596627,Poptr1|583948,Poptr1|584  
492,Poptr1|586480,Poptr1|586288,Poptr1|580854,Poptr1|577469,Poptr1|586712,Poptr1|100578,Poptr1|100824,Poptr  
1|64733,Poptr1|579177,Poptr1|586509,Poptr1|72210,Poptr1|592780,Poptr1|573308,Poptr1|591376,Poptr1|586507,Pop  
tr1|579836,Poptr1|100115,Poptr1|578425,Poptr1|100114,Poptr1|596098,Poptr1|568483,Poptr1|597472,Poptr1|59565  
7,Poptr1|585692,Poptr1|586484,Poptr1|580853,Poptr1|586511,Poptr1|573327,Poptr1|576827,Poptr1|107230,Poptr1|5  
86499,Poptr1|103561,Poptr1|573328,Poptr1|581120,Poptr1|592989,Poptr1|585346,Poptr1|574946,Poptr1|352394,Pop  
tr1|586503,Poptr1|552729,Poptr1|574944,Poptr1|99614,Poptr1|597155,Poptr1|573378,Poptr1|596308,Poptr1|57988  
8,Poptr1|573304,Poptr1|585543,Poptr1|581804,Poptr1|587532,Poptr1|579846,Poptr1|593003,Poptr1|593426,Poptr1|5  
84371,Poptr1|579862,Poptr1|588339,Poptr1|104087,Poptr1|545758,Poptr1|568509,Poptr1|583356,Poptr1|569987,Pop  
tr1|596091,Poptr1|353088,Poptr1|568522,Poptr1|596263,Poptr1|579797,Poptr1|579627,Poptr1|576882,Poptr1|5864  
82,Poptr1|593435,Poptr1|588023,Poptr1|594710,Poptr1|581370,Poptr1|585347,Poptr1|585826,Poptr1|590857,Poptr1|  
575087,Poptr1|582086,Poptr1|582285,Poptr1|587888,Poptr1|571316,Poptr1|585825,Poptr1|575090,Poptr1|575086,Pop  
tr1|581433,Poptr1|592356,Poptr1|565631,Poptr1|583953,Poptr1|594101,Poptr1|573511,Poptr1|571700,Poptr1|5852  
04,Poptr1|578434,Poptr1|580689,Poptr1|588084,Poptr1|597775,Poptr1|586487,Poptr1|573307,Poptr1|596626,Poptr1|  
587530,Poptr1|589317,Poptr1|573310,Poptr1|579241,Poptr1|107989,Poptr1|103468,Poptr1|553378,Poptr1|581435,Pop  
tr1|592355,Poptr1|565630,Poptr1|593287,Poptr1|573298,Poptr1|573369,Poptr1|581152,Poptr1|573299,Poptr1|5737  
92,Poptr1|102622,Poptr1|5856475,Poptr1|586481,Poptr1|586478,Poptr1|585132,Poptr1|109097,Poptr1|591114,Poptr1|  
596307,Poptr1|573305,Poptr1|585827,Poptr1|586207,Poptr1|593449,Poptr1|583070,Poptr1|587887,Poptr1|586502,Pop  
tr1|571701,Poptr1|355739,Poptr1|592733,Poptr1|575088,Poptr1|100101,Poptr1|581434,Poptr1|587545,Poptr1|656  
22,Poptr1|586508,Poptr1|579178,Poptr1|586486,Poptr1|587525,Poptr1|357103,Poptr1|65409,Poptr1|348591,Poptr1|5  
93735,Poptr1|586485,Poptr1|586688,Poptr1|586689,Poptr1|593004,Poptr1|577292,Poptr1|596469,Poptr1|573458,Pop  
tr1|593002,Poptr1|596099,Poptr1|587527,Poptr1|579180,Poptr1|102902  
AT3G05760  
Poptr1|729449  
AT2G25605 Poptr1|695007  
AT1G31930 Poptr1|590073,Poptr1|646310  
Poptr1|355100,Poptr1|60339

Poptr1|554077  
AT4G34390 Poptr1|744199  
AT2G23460 Poptr1|694414,Poptr1|76201  
AT2G26530 Poptr1|591893,Poptr1|551877  
AT2G15760 Poptr1|557352,Poptr1|60533  
Poptr1|64615  
AT5G11760Poptr1|577927,Poptr1|653930  
AT5G04110Poptr1|107937,Poptr1|597384  
Poptr1|584677  
AT5G04130,AT3G10270 Poptr1|576166,Poptr1|717490  
Poptr1|587121  
AT2G26990 Poptr1|104649  
Poptr1|583397,Poptr1|558178  
AT2G24530,AT4G31440 Poptr1|583151,Poptr1|98436,Poptr1|61207  
Poptr1|639756,Poptr1|343916  
AT2G14850,AT4G33890 Poptr1|722388,Poptr1|549985  
AT5G67410  
AT2G46150 Poptr1|572317,Poptr1|552221  
AT2G44000,AT1G64065 Poptr1|348650  
Poptr1|48710,Poptr1|554425  
AT4G23610  
AT3G17890 Poptr1|354396  
AT3G21070 Poptr1|557869,Poptr1|691429  
Poptr1|582818  
Poptr1|571322  
Poptr1|346710  
AT5G42540  
AT1G75660 Poptr1|346711,Poptr1|715413  
AT1G54490 Poptr1|595465,Poptr1|729786  
AT4G29410,AT2G19730 Poptr1|691315,Poptr1|553546  
AT5G44730 Poptr1|693324  
AT3G63330 Poptr1|559603  
AT1G07410 Poptr1|560047,Poptr1|690265  
AT4G07524 Poptr1|555731  
AT5G46025  
AT1G01200 Poptr1|552312  
Poptr1|591766,Poptr1|692478  
AT4G39990  
AT5G47960 Poptr1|102755,Poptr1|706463  
AT5G64990  
AT5G47520 Poptr1|701233  
AT4G18430  
AT1G49300  
Poptr1|353608,Poptr1|55513  
AT1G16920  
Poptr1|669300,Poptr1|685021  
Poptr1|684390  
AT4G18800,AT5G45750 Poptr1|699015,Poptr1|555641,Poptr1|669971  
AT5G03520,AT3G09900  
AT3G15060  
AT1G22740  
AT3G46830,AT5G59150  
AT1G05810,AT2G31680,AT2G43130 Poptr1|572932,Poptr1|645125  
Poptr1|704012  
AT1G06400  
Poptr1|708992,Poptr1|646160,Poptr1|589905  
AT4G09720 Poptr1|694649,Poptr1|710590  
AT3G09910,AT5G03530 Poptr1|676093,Poptr1|735561  
AT3G54840 Poptr1|659917,Poptr1|720578  
Poptr1|563669,Poptr1|567684  
AT1G09630 Poptr1|704700,Poptr1|596757  
Poptr1|588884  
AT2G22290  
AT5G39620  
Poptr1|706225,Poptr1|723340  
AT4G03156,AT4G08190  
AT2G33870,AT1G28550 Poptr1|705009,Poptr1|104794  
Poptr1|562725,Poptr1|558629  
AT5G65270 Poptr1|650703,Poptr1|695871  
AT4G17170 Poptr1|685887,Poptr1|744799  
AT1G73640,AT1G18200 Poptr1|688451  
AT5G45130,AT4G19640 Poptr1|575530,Poptr1|705044  
AT3G07410 Poptr1|692043  
AT5G60860 Poptr1|691859  
Poptr1|581000  
AT5G10260 Poptr1|71637  
AT2G21880  
AT2G44610  
AT4G17530,AT5G47200  
AT3G11730Poptr1|704698,Poptr1|742527  
AT1G02130  
AT1G43890 Poptr1|710917,Poptr1|551379,Poptr1|694280,Poptr1|718600

AT4G35860 Poptr1|648984  
AT3G16100,AT1G52280 Poptr1|693701,Poptr1|548847  
AT4G17160  
AT4G39890 Poptr1|582783,Poptr1|574368  
AT3G12160 Poptr1|57969,Poptr1|98707  
AT3G18820 Poptr1|712937,Poptr1|722061  
AT3G46060,AT5G59840,AT3G53610 Poptr1|659728,Poptr1|656054  
Poptr1|586901  
AT3G04460 Poptr1|571109  
AT1G57680 Poptr1|596762,Poptr1|672826  
Poptr1|569632  
AT4G29120 Poptr1|578542  
AT1G71180,AT1G71170 Poptr1|63864  
AT1G44790 Poptr1|571734,Poptr1|554059,Poptr1|574481,Poptr1|716636  
AT4G31290 Poptr1|672632,Poptr1|586352,Poptr1|645772  
AT5G26220  
Poptr1|595992  
AT2G39170 Poptr1|563699,Poptr1|567661  
AT2G04630,AT5G51940 Poptr1|666991,Poptr1|570493  
AT3G48050,AT3G48060  
Poptr1|733260  
Poptr1|570062,Poptr1|666432,Poptr1|575122  
Poptr1|728989  
Poptr1|661970  
AT5G55290,AT4G26710 Poptr1|687538,Poptr1|707599  
Poptr1|353043  
AT4G32140 Poptr1|737259,Poptr1|694975  
AT2G27720,AT2G27710,AT3G44590  
AT3G28500,AT5G40040  
Poptr1|703503,Poptr1|556974  
AT5G16850 Poptr1|349287  
Poptr1|581909  
Poptr1|568306  
AT1G11580 Poptr1|698859  
Poptr1|577966  
AT5G19730 Poptr1|690312  
AT5G04970,AT3G10720 Poptr1|344832  
AT4G02300,AT4G02320 Poptr1|348277  
AT2G26440 Poptr1|589360  
AT3G10710,AT5G04960 Poptr1|567840,Poptr1|563492  
AT1G02810,AT4G02330,AT2G47550 Poptr1|348276,Poptr1|572672  
AT5G09760,AT5G64640 Poptr1|718566,Poptr1|51664  
AT3G29090 Poptr1|545739  
AT4G00190  
AT2G43050,AT3G59010 Poptr1|732175  
AT5G27870,AT3G05610 Poptr1|581908,Poptr1|570760  
AT3G27980,AT1G11590,AT4G03930  
AT3G60730 Poptr1|552028  
AT4G33230,AT2G26450 Poptr1|589359  
Poptr1|589338  
Poptr1|655414  
Poptr1|590154  
AT3G06830,AT5G49180,AT4G15980  
AT2G36710 Poptr1|589520  
Poptr1|589356,Poptr1|581564  
AT3G49220 Poptr1|569547,Poptr1|687702,Poptr1|700796  
AT5G07430,AT5G07420,AT5G07410,AT1G69940,AT5G61680  
Poptr1|352321,Poptr1|593729,Poptr1|561317,Poptr1|346058,Poptr1|346059,Poptr1|106439,Poptr1|58818  
3,Poptr1|688571  
Poptr1|673259,Poptr1|739961,Poptr1|676332,Poptr1|583478,Poptr1|98634,Poptr1|583475,Poptr1|594024,  
Poptr1|561922,Poptr1|105801,Poptr1|561923  
AT3G05620 Poptr1|570758,Poptr1|581910  
AT5G53370  
Poptr1|597707  
AT2G47280,AT2G19150  
AT1G53840,AT3G14300 Poptr1|584164,Poptr1|349691  
Poptr1|572575  
AT3G14310,AT1G53830 Poptr1|748497,Poptr1|676335,Poptr1|553829  
AT1G23200 Poptr1|566463  
AT3G47400 Poptr1|575665,Poptr1|570594  
AT3G24130,AT5G18990 Poptr1|577418  
AT5G20860 Poptr1|589355  
AT4G33220,AT3G43270 Poptr1|702691  
AT2G21610 Poptr1|546667  
AT1G05310 Poptr1|575986  
Poptr1|356380,Poptr1|575664,Poptr1|575662  
AT5G26810 Poptr1|592102,Poptr1|581688,Poptr1|108409,Poptr1|544996  
Poptr1|577681  
AT5G55590 Poptr1|65476  
AT2G36700  
AT5G51490,AT5G51500

AT3G42160 Poptr1|107118  
Poptr1|676914,Poptr1|570408,Poptr1|582220,Poptr1|65096,Poptr1|570759,Poptr1|98633  
AT1G44980 Poptr1|570597  
Poptr1|588182  
AT2G47040,AT2G47030,AT3G62170 Poptr1|548766,Poptr1|343252,Poptr1|548768,Poptr1|553456  
Poptr1|589358  
AT1G11370  
AT3G17060 Poptr1|354021  
AT5G47500 Poptr1|553872  
AT2G45220 Poptr1|572081,Poptr1|552027  
AT4G14310 Poptr1|565786,Poptr1|354599  
AT4G37510 Poptr1|684970  
AT1G12850 Poptr1|732114,Poptr1|343121  
AT5G57280 Poptr1|701933,Poptr1|683931  
AT2G44530 Poptr1|665011  
AT1G32380,AT2G35390 Poptr1|589975,Poptr1|704007,Poptr1|674090  
AT2G36835 Poptr1|681526,Poptr1|702766  
AT4G34430 Poptr1|546045  
AT2G33610 Poptr1|550727  
AT1G21700 Poptr1|559267  
AT2G47620 Poptr1|575397  
AT1G44350 Poptr1|716674,Poptr1|551444  
Poptr1|345629  
AT3G02875 Poptr1|344530  
Poptr1|580252  
AT1G51780,AT1G51760 Poptr1|693769  
AT5G56650,AT5G56660  
Poptr1|735294  
AT5G54140 Poptr1|574650,Poptr1|729069  
AT5G01600 Poptr1|597575,Poptr1|747872,Poptr1|577048,Poptr1|560947  
AT2G40300,AT3G56090  
AT3G11050Poptr1|686432,Poptr1|724397  
AT4G29680 Poptr1|582943,Poptr1|653311  
AT4G29710,AT4G29700,AT4G29690  
AT4G39740 Poptr1|562617,Poptr1|715909  
AT3G08950 Poptr1|576993  
Poptr1|102022  
AT5G09350,AT5G64070 Poptr1|75580,Poptr1|741984  
Poptr1|681446  
AT4G16410 Poptr1|652434  
AT2G07727 Poptr1|591303,Poptr1|592419,Poptr1|593309,Poptr1|587251  
Poptr1|100260  
AT2G20340 Poptr1|684124  
Poptr1|102884,Poptr1|571156,Poptr1|555516  
AT4G28680  
AT1G09810 Poptr1|745557,Poptr1|681024  
AT1G55500,AT3G13460 Poptr1|639601,Poptr1|647427  
AT3G13060 Poptr1|671917,Poptr1|563373  
AT5G58190 Poptr1|560707,Poptr1|99222  
AT1G27960 Poptr1|640029  
AT5G61020,AT3G03950  
AT1G79270 Poptr1|564146,Poptr1|567126  
AT1G48110,AT3G17330 Poptr1|345171  
Poptr1|573919  
Poptr1|548022,Poptr1|681025  
AT3G18410,AT1G49140 Poptr1|680876,Poptr1|661749  
AT5G17670 Poptr1|699937  
AT4G20720,AT1G05090 Poptr1|692189  
AT3G16220  
AT3G16230 Poptr1|579555,Poptr1|553751,Poptr1|64040  
AT1G49400,AT3G18880 Poptr1|690451,Poptr1|685763,Poptr1|573183  
AT1G51080 Poptr1|353119  
Poptr1|642208  
AT5G55100 Poptr1|642207  
AT2G28800 Poptr1|706186,Poptr1|697659  
AT1G24490 Poptr1|354722,Poptr1|565957  
AT2G21520,AT4G39170 Poptr1|556494,Poptr1|697258  
AT4G34580,AT2G16380  
Poptr1|52173,Poptr1|346784  
AT1G55690 Poptr1|708198,Poptr1|98101  
AT5G47510 Poptr1|103601,Poptr1|98100,Poptr1|349726,Poptr1|356459  
AT3G24840 Poptr1|348977  
AT5G56160  
AT2G18180,AT4G36490 Poptr1|53401,Poptr1|593901  
AT4G39180,AT2G21540 Poptr1|649382,Poptr1|556493  
AT1G75370,AT1G19650  
AT5G03170 Poptr1|576678,Poptr1|739430  
AT2G20520  
AT5G44130,AT1G03870 Poptr1|592161,Poptr1|665850  
AT5G60490  
Poptr1|574750,Poptr1|728480,Poptr1|661522,Poptr1|558258,Poptr1|574550,Poptr1|665967,Poptr1|10299  
0,Poptr1|571844,Poptr1|103363,Poptr1|571846,Poptr1|579530,Poptr1|570768,Poptr1|595206,Poptr1|574548,Poptr1|5

95056,Poptr1|723575,Poptr1|575682,Poptr1|728650,Poptr1|549783  
AT2G04780 Poptr1|573060,Poptr1|711438  
AT5G47075,AT5G47077,AT5G47175,AT3G61172 Poptr1|576410  
Poptr1|644272,Poptr1|591729  
Poptr1|578817  
AT5G45290 Poptr1|676688,Poptr1|693534,Poptr1|676687  
Poptr1|76362  
AT4G36390 Poptr1|53409  
AT5G49050 Poptr1|587324  
AT2G47710 Poptr1|552434,Poptr1|644863,Poptr1|688269  
AT4G02440 Poptr1|552435,Poptr1|688268  
Poptr1|570761  
AT2G26740,AT2G26750  
Poptr1|582262,Poptr1|348275  
Poptr1|47224,Poptr1|680710  
Poptr1|584229  
AT4G15955,AT4G15960  
AT3G05600  
Poptr1|565561  
Poptr1|581900  
Poptr1|556509  
AT3G51000 Poptr1|686099  
AT4G02340 Poptr1|731786,Poptr1|552463,Poptr1|664408,Poptr1|595926,Poptr1|558586,Poptr1|592094  
Poptr1|106648  
AT1G50590  
Poptr1|585303  
AT3G59260,AT3G59220,AT2G43120 Poptr1|572931,Poptr1|684207  
Poptr1|588559,Poptr1|592968,Poptr1|580849  
AT1G08490 Poptr1|697480  
AT2G37560 Poptr1|349913  
Poptr1|584035  
AT2G41990 Poptr1|648844,Poptr1|686637  
AT3G08490 Poptr1|722780,Poptr1|641364  
AT4G35170  
AT3G24600  
AT1G45688,AT5G42860 Poptr1|677872,Poptr1|710606,Poptr1|76101  
Poptr1|640861,Poptr1|553729  
AT5G07960 Poptr1|569929,Poptr1|683295  
AT1G01820  
AT3G61070,AT2G45740 Poptr1|552115,Poptr1|572179,Poptr1|721731  
AT2G34460 Poptr1|727847  
AT4G21215 Poptr1|694055,Poptr1|568218  
AT4G38370 Poptr1|648934,Poptr1|741839  
AT5G26160  
AT5G20610 Poptr1|561025  
Poptr1|561619  
Poptr1|561618  
AT5G06120 Poptr1|584424,Poptr1|350939,Poptr1|48484  
AT1G74730 Poptr1|569992,Poptr1|587657,Poptr1|704274  
AT5G08050 Poptr1|689876  
AT3G02660  
Poptr1|579772  
Poptr1|590422,Poptr1|587454  
AT1G01770 Poptr1|342743  
AT1G71190Poptr1|63863  
AT5G11870Poptr1|717943  
AT4G02920,AT1G03340 Poptr1|348497,Poptr1|572802  
Poptr1|108714  
AT3G01920 Poptr1|707019  
AT5G10620 Poptr1|583190  
Poptr1|576161,Poptr1|351417  
AT4G18593 Poptr1|693977  
Poptr1|590028,Poptr1|658207  
Poptr1|658783,Poptr1|564607  
AT2G25480,AT4G32330 Poptr1|578210,Poptr1|654148  
AT2G35880 Poptr1|653406,Poptr1|667581  
AT5G43260 Poptr1|548029,Poptr1|747848,Poptr1|554780  
AT1G53460 Poptr1|65594  
AT2G39830  
AT5G66640,AT5G17890,AT5G66610,AT5G66620,AT5G66630  
AT4G36860 Poptr1|747299,Poptr1|357026,Poptr1|719410  
AT1G19270 Poptr1|347711  
AT3G55520 Poptr1|563920,Poptr1|687350  
AT4G33470 Poptr1|71535  
AT1G71850 Poptr1|592213  
AT2G31290 Poptr1|72580  
AT4G24320  
Poptr1|576412  
AT5G48040 Poptr1|348654  
Poptr1|552260  
AT5G62990 Poptr1|348689  
AT4G08940 Poptr1|347395

AT2G39120 Poptr1|563712  
AT5G45790 Poptr1|576106  
AT3G63090 Poptr1|590561,Poptr1|644978  
AT3G58520 Poptr1|352209  
AT5G21970 Poptr1|561556  
AT4G33495 Poptr1|570472,Poptr1|591581,Poptr1|667007  
Poptr1|659908  
AT1G06440 Poptr1|348994,Poptr1|592637  
AT2G34050  
Poptr1|647908  
AT1G32920,AT1G32928  
Poptr1|666056,Poptr1|661578,Poptr1|677470,Poptr1|550457,Poptr1|642518,Poptr1|569269  
AT1G23110,AT1G70900 Poptr1|345309,Poptr1|687155  
AT5G04290  
AT2G34210  
AT4G08360 Poptr1|721870  
Poptr1|721868  
Poptr1|649322  
Poptr1|648692  
Poptr1|649321  
Poptr1|713135,Poptr1|648691  
AT4G08350  
Poptr1|647008,Poptr1|690960  
AT2G34590,AT1G30120 Poptr1|714481,Poptr1|736218  
AT5G50850  
AT3G13450,AT1G55510 Poptr1|693134  
AT5G64040 Poptr1|685955,Poptr1|715775  
AT1G51405 Poptr1|107727,Poptr1|64467  
Poptr1|568926,Poptr1|579491  
AT1G07750,AT2G28680 Poptr1|696014,Poptr1|720971  
AT5G52870 Poptr1|569438,Poptr1|670698  
AT4G09830 Poptr1|559416,Poptr1|551292  
AT5G64780  
Poptr1|62682  
AT5G27820 Poptr1|650646,Poptr1|682314  
AT4G34490 Poptr1|722043,Poptr1|556459  
AT3G12280 Poptr1|639804  
AT2G43940 Poptr1|562089,Poptr1|577288  
AT2G43920,AT2G43910  
Poptr1|591072  
Poptr1|107331,Poptr1|694217,Poptr1|556600  
Poptr1|546198,Poptr1|556601,Poptr1|673344,Poptr1|546200,Poptr1|106630  
Poptr1|713230,Poptr1|557117,Poptr1|557116  
AT4G34880  
AT3G11450,AT5G06110 Poptr1|547746,Poptr1|555116  
AT1G74250  
Poptr1|558206  
AT4G26965 Poptr1|343609,Poptr1|691157  
AT3G11810,AT2G03330 Poptr1|564257  
AT4G01900 Poptr1|692244  
AT1G71720 Poptr1|651627,Poptr1|551281  
AT1G53490 Poptr1|589793,Poptr1|584875  
Poptr1|552920  
Poptr1|545494  
AT3G59990,AT2G44180  
AT5G51545 Poptr1|666908  
AT1G51350 Poptr1|641283,Poptr1|722931  
AT1G63180,AT1G12780 Poptr1|693451  
Poptr1|344034,Poptr1|688657  
Poptr1|106108  
AT2G34850,AT1G30620,AT4G20460,AT5G44480 Poptr1|699226,Poptr1|550555  
AT3G28530,AT4G23920,AT4G10960,AT1G64440 Poptr1|683654,Poptr1|646762  
Poptr1|548448  
AT2G33790,AT2G34700 Poptr1|647963,Poptr1|97180  
AT5G27700,AT3G53890 Poptr1|672790,Poptr1|690220,Poptr1|682822  
AT3G24210  
AT1G62050 Poptr1|660237,Poptr1|555304  
AT1G04780 Poptr1|647109,Poptr1|63082  
AT1G11740  
AT3G04470 Poptr1|738252,Poptr1|729899  
AT2G17270 Poptr1|595018,Poptr1|71866  
AT3G48850  
Poptr1|571621  
AT5G14040 Poptr1|679686,Poptr1|65029  
Poptr1|662210,Poptr1|575439  
AT3G51220,AT2G17940,AT1G75720 Poptr1|652056,Poptr1|642969,Poptr1|593849  
AT3G17910 Poptr1|345791  
Poptr1|590410,Poptr1|355466  
AT1G48510  
AT3G30841,AT4G09520 Poptr1|693818,Poptr1|556175,Poptr1|580748  
AT4G34120 Poptr1|722241,Poptr1|642012  
AT4G36910 Poptr1|719238,Poptr1|558887

AT3G52730 Poptr1|697118,Poptr1|594840  
AT3G45970,AT3G45960,AT4G38400 Poptr1|694260,Poptr1|721600  
AT5G45620,AT4G19006 Poptr1|689501,Poptr1|646311  
AT1G16290 Poptr1|696726  
AT5G58770 Poptr1|54700,Poptr1|641074,Poptr1|65114  
AT5G60510,AT5G60500  
Poptr1|346855,Poptr1|579560  
AT2G23410,AT2G23400,AT5G58782,AT5G58780,AT5G58784  
Poptr1|105985  
Poptr1|109192  
AT2G17570 Poptr1|71888  
AT4G38320,AT4G37680  
AT2G24150,AT4G30850 Poptr1|653628,Poptr1|737935  
Poptr1|53460  
AT5G20270 Poptr1|736498,Poptr1|98768  
AT2G40710 Poptr1|76491  
AT4G38290,AT4G38330  
Poptr1|571983  
AT1G09620 Poptr1|583489,Poptr1|742535  
AT5G51010 Poptr1|570373,Poptr1|586662,Poptr1|575479  
AT5G10130 Poptr1|53193,Poptr1|558559,Poptr1|694323  
AT4G08685 Poptr1|692676,Poptr1|682153  
AT1G78040  
AT4G18596,AT5G45880,AT1G29140 Poptr1|107330,Poptr1|583034,Poptr1|568820  
AT4G29940 Poptr1|560666  
AT1G55805  
AT4G26500 Poptr1|550633,Poptr1|582565  
AT5G03430 Poptr1|59177  
AT1G74390  
AT5G61390,AT5G07710 Poptr1|581379  
AT4G39810 Poptr1|71674,Poptr1|562635  
AT5G38530 Poptr1|704136  
AT2G47450 Poptr1|557028,Poptr1|597356,Poptr1|546292  
AT1G50040,AT3G19680 Poptr1|642137,Poptr1|722466  
AT5G17640 Poptr1|571332  
AT4G29310  
AT1G10020 Poptr1|558970,Poptr1|551729  
AT2G46180,AT3G61570 Poptr1|700258,Poptr1|348027  
AT5G17910 Poptr1|574028  
Poptr1|665576,Poptr1|681242  
AT4G13590 Poptr1|647087,Poptr1|708677  
AT1G64150  
Poptr1|640414  
AT1G68650,AT1G25520 Poptr1|656785,Poptr1|60270,Poptr1|566658  
Poptr1|693403  
Poptr1|647089  
AT5G36290  
Poptr1|595319  
Poptr1|662713  
Poptr1|662714  
AT5G27660  
Poptr1|584145  
AT1G72420,AT1G17350 Poptr1|726408  
AT1G08160 Poptr1|558338  
Poptr1|558551,Poptr1|559123  
AT5G21130,AT2G27080  
Poptr1|580377,Poptr1|571757  
AT1G54540 Poptr1|546394,Poptr1|61169  
AT5G36970,AT1G65690 Poptr1|575862,Poptr1|570412  
AT2G35980 Poptr1|576519  
AT2G18400 Poptr1|560644,Poptr1|655315  
AT1G05190  
Poptr1|680806,Poptr1|583588,Poptr1|552789,Poptr1|572955  
AT1G53645 Poptr1|575757  
AT1G52500 Poptr1|740875  
AT5G43930,AT1G04140 Poptr1|700713,Poptr1|692017  
AT3G10640,AT5G04850 Poptr1|686557,Poptr1|698783  
AT3G54200 Poptr1|589599,Poptr1|668257  
AT3G05975 Poptr1|676208,Poptr1|668256  
AT3G26570 Poptr1|354776  
AT5G53030,AT4G00950 Poptr1|552289,Poptr1|700298  
AT2G20710 Poptr1|98191,Poptr1|582700  
AT5G27460 Poptr1|72255  
AT1G02150 Poptr1|347773,Poptr1|591758  
AT5G09450 Poptr1|701745  
AT2G20720 Poptr1|551184  
Poptr1|576429,Poptr1|576428,Poptr1|580894,Poptr1|98188  
AT4G02820 Poptr1|559545  
AT4G21705 Poptr1|580892,Poptr1|555809  
AT1G60770 Poptr1|578456,Poptr1|669301,Poptr1|704775  
Poptr1|584798,Poptr1|586180,Poptr1|582699,Poptr1|597386,Poptr1|582697  
AT4G01990,AT1G02370 Poptr1|348362



AT3G11350,AT3G11380,AT1G28020,AT1G28000,AT1G43010  
AT1G72060 Poptr1|574249  
AT3G29390 Poptr1|577748  
Poptr1|577747  
AT5G13890 Poptr1|593297,Poptr1|553107  
AT3G23640 Poptr1|590129  
Poptr1|65722  
AT3G45940,AT1G68560 Poptr1|564524  
AT5G11720Poptr1|65723,Poptr1|569295,Poptr1|569296,Poptr1|596283  
Poptr1|569294  
Poptr1|596285  
AT5G63840 Poptr1|558465,Poptr1|718651  
Poptr1|646378  
AT4G38780  
AT1G80070 Poptr1|597610  
Poptr1|583786,Poptr1|569365,Poptr1|740880  
AT1G19340 Poptr1|59422  
Poptr1|672802  
AT2G02570 Poptr1|596786  
AT5G39640,AT4G01023  
AT5G06420,AT1G01350 Poptr1|731318  
AT1G77090 Poptr1|710969  
AT5G12470 Poptr1|722948,Poptr1|691430  
Poptr1|64517  
AT1G16590 Poptr1|569173,Poptr1|674730  
Poptr1|569172  
AT1G51160Poptr1|592939  
AT3G21200 Poptr1|353151,Poptr1|687434  
AT5G04990,AT3G10730 Poptr1|55667,Poptr1|344831  
Poptr1|703472,Poptr1|654432  
AT1G68160  
AT3G07565 Poptr1|732566  
AT1G60670,AT1G10820 Poptr1|721089,Poptr1|698126  
AT1G79780  
AT3G16300 Poptr1|553757,Poptr1|64055  
Poptr1|590934  
AT1G09800 Poptr1|745559  
AT1G73180 Poptr1|582759  
AT1G27090 Poptr1|657575,Poptr1|696222  
AT3G24690  
AT5G08400 Poptr1|567746  
Poptr1|553084  
AT4G29400 Poptr1|572910  
AT1G34640 Poptr1|347382  
AT5G50890 Poptr1|651688,Poptr1|342327  
AT5G48490,AT5G48485 Poptr1|692036,Poptr1|700547,Poptr1|697297  
AT3G10230 Poptr1|591312,Poptr1|667325,Poptr1|652630  
Poptr1|98298,Poptr1|653266  
Poptr1|556844,Poptr1|594931,Poptr1|586534  
AT5G57030 Poptr1|653265  
AT5G48470 Poptr1|553249  
AT3G55680,AT2G31425,AT2G31430 Poptr1|348386  
AT1G47813,AT1G47820 Poptr1|664358  
AT3G17300  
Poptr1|696654,Poptr1|47297  
Poptr1|589106,Poptr1|705653  
Poptr1|559626  
AT1G13570 Poptr1|354075,Poptr1|566718,Poptr1|692506,Poptr1|703081,Poptr1|580732,Poptr1|580600  
AT5G54660 Poptr1|569061,Poptr1|571467  
AT1G30260 Poptr1|568438,Poptr1|648414  
AT1G54410  
Poptr1|663123,Poptr1|571250,Poptr1|571249,Poptr1|582807  
AT3G11240,AT5G05700 Poptr1|564003,Poptr1|567284  
AT3G62140 Poptr1|572529  
AT1G21200 Poptr1|559372,Poptr1|347129  
AT1G76870  
AT3G10040 Poptr1|103740,Poptr1|58122  
Poptr1|554971,Poptr1|547879  
AT2G32350 Poptr1|594463  
Poptr1|567775  
AT1G50430 Poptr1|353123,Poptr1|698733  
AT5G64420 Poptr1|642172,Poptr1|649770  
AT3G61710 Poptr1|684315  
AT5G38700,AT4G02170 Poptr1|664381,Poptr1|552501  
AT3G02860 Poptr1|552894  
AT5G52290 Poptr1|575819,Poptr1|356235  
AT2G37330 Poptr1|561531,Poptr1|688775  
AT5G18250,AT3G04040 Poptr1|62938  
AT1G31800  
Poptr1|107441,Poptr1|575774  
AT4G20235 Poptr1|576295  
Poptr1|108221

Poptr1|591135  
 Poptr1|551889,Poptr1|586946  
 AT5G35917,AT5G05260  
 Poptr1|550188,Poptr1|550184,Poptr1|550174,Poptr1|579843,Poptr1|595708  
 AT1G74540,AT1G74550  
 Poptr1|597313,Poptr1|348340  
 Poptr1|585709,Poptr1|573091,Poptr1|567659  
 Poptr1|597004  
 Poptr1|586654,Poptr1|595568,Poptr1|699776  
 Poptr1|663265  
 Poptr1|595279  
 Poptr1|64588,Poptr1|557740,Poptr1|697478  
 AT5G04330  
 Poptr1|583513  
 Poptr1|64620,Poptr1|54623  
 AT2G45550,AT2G45570,AT2G45560,AT1G33730,AT1G33720,AT2G45580,AT3G61040  
 Poptr1|347891,Poptr1|552079,Poptr1|594022,Poptr1|342710,Poptr1|552074,Poptr1|711704,Poptr1|48778  
 Poptr1|104273,Poptr1|588063,Poptr1|588064,Poptr1|595639  
 Poptr1|584934,Poptr1|592023  
 Poptr1|586542  
 Poptr1|576297  
 Poptr1|674087  
 AT5G09970 Poptr1|562708,Poptr1|694349,Poptr1|347060,Poptr1|52062  
 Poptr1|550918  
 Poptr1|560810  
 AT5G06905 Poptr1|98710  
 AT2G30490 Poptr1|571917,Poptr1|739008  
 Poptr1|747882,Poptr1|63116,Poptr1|350639  
 Poptr1|583915,Poptr1|595744  
 Poptr1|591864  
 Poptr1|105888  
 Poptr1|596339,Poptr1|654851  
 Poptr1|550923  
 Poptr1|550173  
 Poptr1|594538  
 Poptr1|549656,Poptr1|549654  
 Poptr1|344463  
 Poptr1|106121,Poptr1|108237  
 AT3G61035 Poptr1|596342  
 AT1G64950,AT2G12190,AT1G64940,AT1G64930,AT1G64900,AT5G61320  
 Poptr1|53198,Poptr1|580036,Poptr1|558572,Poptr1|571395,Poptr1|663266,Poptr1|574677  
 Poptr1|567977,Poptr1|64602  
 AT3G61880,AT2G46660 Poptr1|554562,Poptr1|548260,Poptr1|700313,Poptr1|552309  
 Poptr1|350003  
 Poptr1|748220,Poptr1|97465  
 Poptr1|569050  
 Poptr1|101879,Poptr1|580828  
 Poptr1|345974,Poptr1|570172,Poptr1|345975,Poptr1|575255  
 AT3G20120  
 AT4G37330,AT4G37320,AT4G37360,AT4G37340,AT1G66540,AT4G37370,AT2G23190,AT2G23220,AT3G28740,AT5  
 G36220,AT5G57220,AT4G37430,AT4G37410,AT4G37400,AT4G37310,AT5G67310  
 Poptr1|342582,Poptr1|579262,Poptr1|579263,Poptr1|347615,Poptr1|551808,Poptr1|572062,Poptr1|57930  
 5,Poptr1|583523,Poptr1|104598,Poptr1|583520,Poptr1|745537,Poptr1|651125,Poptr1|686156,Poptr1|716307,Poptr1|1  
 00360,Poptr1|75528,Poptr1|558912,Poptr1|100362,Poptr1|592016  
 Poptr1|546129  
 AT1G16400,AT1G16410,AT1G58260,AT1G79370  
 Poptr1|587288  
 Poptr1|550176,Poptr1|573089  
 AT2G42250 Poptr1|593072,Poptr1|583617  
 Poptr1|560691  
 AT3G53130 Poptr1|589522  
 Poptr1|688997,Poptr1|589289  
 AT4G12320,AT4G12310,AT4G12300,AT4G12330,AT5G44620 Poptr1|704247  
 AT1G50560,AT1G50520,AT3G32047,AT2G14100,AT3G20960,AT2G05180,AT4G15360,AT3G20130,AT3G20950,AT3  
 G20940,AT4G15350,AT5G47990,AT2G27010,AT2G27000,AT3G20100,AT3G20110,AT3G20140,AT3G20080,AT4G15  
 380,AT5G42580,AT4G15330,AT1G28430  
 Poptr1|560692  
 AT1G13710,AT1G74110 Poptr1|591162  
 Poptr1|562681  
 Poptr1|591863  
 Poptr1|582895,Poptr1|576112,Poptr1|591136  
 Poptr1|545604,Poptr1|594535  
 Poptr1|584935  
 AT2G26170 Poptr1|589557,Poptr1|560858  
 AT4G22690,AT4G22710  
 AT5G10600,AT5G10610 Poptr1|347618  
 Poptr1|106127  
 Poptr1|591869,Poptr1|594036,Poptr1|593664,Poptr1|596410,Poptr1|591868,Poptr1|583742,Poptr1|59186  
 6  
 AT2G25160 Poptr1|347690,Poptr1|587667,Poptr1|596741,Poptr1|645827

AT3G48300,AT3G48270,AT3G48320,AT3G48310,AT3G48290,AT3G48280,AT2G30770,AT2G30750,AT1G11610,AT5  
G24950,AT5G24960,AT4G13290,AT4G13310,AT5G42590,AT4G20240  
Poptr1|577186,Poptr1|577188,Poptr1|577189,Poptr1|355968  
Poptr1|589112,Poptr1|591035,Poptr1|353799  
Poptr1|594534,Poptr1|594537,Poptr1|589083  
Poptr1|584111,Poptr1|677452,Poptr1|553609,Poptr1|553608,Poptr1|645828,Poptr1|645826,Poptr1|53324,  
Poptr1|704787  
Poptr1|681261  
Poptr1|550178  
AT1G01280 Poptr1|348086  
AT3G52970 Poptr1|101190,Poptr1|588651,Poptr1|101195,Poptr1|588655,Poptr1|588644  
AT5G06900 Poptr1|98712,Poptr1|583619  
AT3G10570,AT5G04660,AT5G04630,AT3G10560 Poptr1|353289  
AT1G11600Poptr1|555353,Poptr1|546355  
AT1G01190  
Poptr1|99255  
AT5G25120,AT5G25130,AT5G25140,AT5G25180,AT3G26310,AT3G26300,AT3G26290,AT3G26320,AT3G26330,AT2  
G02580,AT5G57260,AT2G24180,AT1G13100,AT1G13090,AT1G13110,AT3G26830,AT3G26210,AT3G26190,AT3G26  
200,AT3G53280,AT3G44250,AT5G35715,AT3G53300,AT3G53305,AT3G53290,AT3G26170,AT3G26180,AT3G26150,  
AT3G26160,AT1G13080,AT3G26270,AT3G26280,AT3G26230,AT3G26220  
Poptr1|354762,Poptr1|565129,Poptr1|565131,Poptr1|103236,Poptr1|565138,Poptr1|565127  
Poptr1|108581  
Poptr1|583522,Poptr1|583558  
Poptr1|102869,Poptr1|350097,Poptr1|581210  
Poptr1|550175  
AT3G03470  
AT2G40890 Poptr1|685839  
Poptr1|569052,Poptr1|595641,Poptr1|569053,Poptr1|562775,Poptr1|695954,Poptr1|75918,Poptr1|100844,  
Poptr1|96957,Poptr1|580589  
Poptr1|575895  
AT4G15110Poptr1|351148  
Poptr1|585265  
AT5G35920 Poptr1|592028,Poptr1|585936  
Poptr1|562674  
AT4G13770,AT4G31500  
Poptr1|346721,Poptr1|584186,Poptr1|550917,Poptr1|550924,Poptr1|550922,Poptr1|104793,Poptr1|73008  
Poptr1|562672,Poptr1|579768,Poptr1|591034,Poptr1|562675,Poptr1|104506,Poptr1|53213,Poptr1|75820,  
Poptr1|562685,Poptr1|108843,Poptr1|75817,Poptr1|562669,Poptr1|104161,Poptr1|562670,Poptr1|562677  
AT3G25180 Poptr1|582767,Poptr1|714415  
AT5G07990 Poptr1|699950  
Poptr1|591862  
AT1G58265  
Poptr1|570498  
AT4G36220 Poptr1|563244,Poptr1|593880  
AT5G25900  
AT2G22330,AT4G39950 Poptr1|571904,Poptr1|571911,Poptr1|584081,Poptr1|555694  
Poptr1|570496,Poptr1|570494,Poptr1|691155,Poptr1|547835,Poptr1|699290  
AT3G20090 Poptr1|108337  
Poptr1|64952,Poptr1|591028  
Poptr1|575352,Poptr1|353961  
Poptr1|595711  
Poptr1|589084  
AT4G31970,AT4G31950,AT4G31940 Poptr1|591870  
AT3G05545 Poptr1|690224,Poptr1|570782  
AT2G15260,AT4G13490  
AT2G47700  
Poptr1|47323  
AT5G19200,AT3G06060  
Poptr1|643360,Poptr1|559509,Poptr1|546663  
AT3G05570,AT4G39235,AT2G21640  
Poptr1|574004,Poptr1|574006  
Poptr1|589274,Poptr1|582927  
AT3G13960 Poptr1|107551,Poptr1|349453,Poptr1|548577  
AT1G09290 Poptr1|698135  
Poptr1|554136,Poptr1|356752  
AT2G38250,AT5G01380 Poptr1|560923,Poptr1|58198  
AT4G17510 Poptr1|646152  
Poptr1|589898  
AT5G06450,AT3G11770 Poptr1|573752  
AT1G64185  
AT5G41650 Poptr1|693399  
AT2G39300,AT3G55060 Poptr1|656002,Poptr1|698621  
Poptr1|593741  
AT1G09740  
AT3G62550 Poptr1|572627,Poptr1|552521  
AT3G25930 Poptr1|566606,Poptr1|592244,Poptr1|354183  
Poptr1|559018,Poptr1|684461  
Poptr1|581950,Poptr1|570724  
AT3G11930Poptr1|344428  
AT3G58450  
Poptr1|698234  
AT1G68300 Poptr1|656825,Poptr1|698232

Poptr1|564232  
AT1G26760 Poptr1|579152,Poptr1|564239  
AT3G19170,AT1G49630 Poptr1|581499  
AT1G33420 Poptr1|58835,Poptr1|545841  
AT2G01810 Poptr1|564690  
AT5G22260  
AT2G07714 Poptr1|678985,Poptr1|545508  
AT1G66170 Poptr1|552897  
Poptr1|593541,Poptr1|594794,Poptr1|564714,Poptr1|581033,Poptr1|350459  
Poptr1|580883,Poptr1|555823  
AT5G53750,AT4G27460 Poptr1|55972,Poptr1|60196  
AT2G36500,AT3G52950 Poptr1|650674  
Poptr1|650672,Poptr1|718677  
AT5G50530,AT5G50640,AT5G63490 Poptr1|356071  
AT1G08840 Poptr1|688382  
AT5G04080 Poptr1|652633  
Poptr1|582844,Poptr1|582845,Poptr1|555143  
Poptr1|676236,Poptr1|105900,Poptr1|555145,Poptr1|555144  
AT1G64660 Poptr1|350415,Poptr1|691044  
AT5G63480 Poptr1|575371,Poptr1|570271  
AT5G19500 Poptr1|584095,Poptr1|63813  
AT1G32500 Poptr1|743165,Poptr1|702913  
AT5G12920 Poptr1|62991  
AT1G28540 Poptr1|555732  
Poptr1|745516,Poptr1|596756,Poptr1|678180,Poptr1|689284  
AT1G57720,AT1G09640  
AT4G20990,AT4G21000 Poptr1|695558,Poptr1|576238,Poptr1|560469  
AT3G52720 Poptr1|561502,Poptr1|576594  
AT5G04180  
Poptr1|589499  
AT1G08080,AT2G28210 Poptr1|595085  
Poptr1|579868  
AT1G08065,AT5G56330  
AT5G53850 Poptr1|55955,Poptr1|689976  
AT1G32270  
Poptr1|572876  
AT5G16830  
AT4G17730,AT5G46860 Poptr1|712176,Poptr1|590045  
Poptr1|592349  
AT3G26050  
AT3G27350,AT5G40700,AT3G01710 Poptr1|574199,Poptr1|657426,Poptr1|565093,Poptr1|691617  
AT1G70950,AT1G23060 Poptr1|564608  
AT1G24160,AT1G70100 Poptr1|354840  
AT3G48340,AT3G48350  
AT4G16190  
Poptr1|75891,Poptr1|570185,Poptr1|591262  
AT2G22160 Poptr1|655969  
AT2G21430,AT4G39090 Poptr1|648662,Poptr1|649354,Poptr1|652004,Poptr1|692954  
AT1G20850 Poptr1|346542,Poptr1|715678  
AT4G36880 Poptr1|51858,Poptr1|562932  
Poptr1|105009,Poptr1|565118,Poptr1|55032  
AT5G45890 Poptr1|546431,Poptr1|595297,Poptr1|555684,Poptr1|545190,Poptr1|555685,Poptr1|595299  
AT3G45310,AT5G60360  
Poptr1|105433,Poptr1|75888,Poptr1|75900,Poptr1|75897,Poptr1|107991,Poptr1|71775,Poptr1|51765,Poptr1|55900,Poptr1|592182,Poptr1|98245,Poptr1|574345  
AT5G43060,AT1G47128 Poptr1|642017,Poptr1|722253  
AT4G11320,AT4G11310,AT4G23520  
Poptr1|568708,Poptr1|713838,Poptr1|568707  
AT5G50260 Poptr1|666563,Poptr1|662080,Poptr1|575269  
AT1G09850 Poptr1|550956,Poptr1|559786  
AT2G34080,AT1G29090,AT1G29110,AT1G29080  
Poptr1|582502  
AT2G27395  
AT4G35350 Poptr1|595022  
AT3G49340,AT2G27420  
AT3G54940 Poptr1|55615  
AT3G19400,AT3G19390,AT3G43960  
AT1G06260 Poptr1|98259  
AT2G42370,AT3G58110 Poptr1|678045,Poptr1|574360  
Poptr1|568551  
AT1G02650,AT4G02100  
AT3G62570,AT2G47440 Poptr1|57182,Poptr1|692267  
Poptr1|559423,Poptr1|695089  
AT4G01420 Poptr1|350363  
Poptr1|579841,Poptr1|576890  
AT5G24270 Poptr1|661524,Poptr1|666129,Poptr1|574749  
AT1G64480 Poptr1|48681  
AT5G55990 Poptr1|660679,Poptr1|707735  
AT4G33000 Poptr1|592745  
Poptr1|560076  
AT4G16350  
AT4G26570

AT4G17615,AT5G47100 Poptr1|670473,Poptr1|739852  
 AT4G26560 Poptr1|75359  
 AT2G43490,AT3G59570 Poptr1|587393,Poptr1|59788,Poptr1|75358  
 AT3G03130,AT5G17160 Poptr1|100088,Poptr1|357049,Poptr1|65011  
 AT1G54770,AT5G30495 Poptr1|674020,Poptr1|682353  
 AT2G21195Poptr1|665667  
 AT1G69240,AT1G26360 Poptr1|564309  
 Poptr1|569188  
 AT4G16690,AT5G58310  
 AT4G09900,AT1G33990 Poptr1|574217  
 AT3G29770 Poptr1|668674,Poptr1|556382,Poptr1|589035  
 AT3G10870 Poptr1|665920  
 AT4G24700 Poptr1|355934,Poptr1|355937,Poptr1|575237  
 AT4G21190  
 AT1G04590 Poptr1|560825,Poptr1|576848  
 Poptr1|548128  
 AT1G55110,AT3G13810  
 AT5G44160,AT1G03840 Poptr1|75342,Poptr1|594620  
 AT5G60470,AT3G45260  
 Poptr1|743567,Poptr1|551126,Poptr1|551125,Poptr1|694721,Poptr1|671662,Poptr1|736898  
 AT5G22890  
 AT5G66730,AT3G50700 Poptr1|346423,Poptr1|563119  
 AT2G01940 Poptr1|354347  
 AT2G02070 Poptr1|566362,Poptr1|345359,Poptr1|658651  
 Poptr1|726751  
 Poptr1|671663,Poptr1|570812,Poptr1|572729  
 Poptr1|564735  
 Poptr1|572728,Poptr1|564738  
 AT1G25250,AT1G68130  
 Poptr1|59609,Poptr1|352667  
 Poptr1|564736  
 AT1G14580,AT2G02080  
 Poptr1|562585  
 Poptr1|665027,Poptr1|553360  
 Poptr1|670754,Poptr1|569394,Poptr1|743565  
 AT5G03150 Poptr1|739427  
 AT4G02670  
 Poptr1|346766  
 AT1G45110Poptr1|72965  
 AT5G02890 Poptr1|349788,Poptr1|676437  
 AT5G26880 Poptr1|686815  
 AT3G60850 Poptr1|572113  
 AT4G38800 Poptr1|697217,Poptr1|713189  
 AT4G34840  
 AT4G33410 Poptr1|570443,Poptr1|734197  
 AT5G27990 Poptr1|595474,Poptr1|570967  
 AT3G22510 Poptr1|566237  
 AT4G03080 Poptr1|674386,Poptr1|572775,Poptr1|552636  
 Poptr1|650401,Poptr1|705890  
 AT1G03445  
 AT1G08420,AT2G27210  
 Poptr1|565601,Poptr1|565602,Poptr1|650403  
 AT4G16790 Poptr1|356498,Poptr1|349765  
 AT3G51640,AT3G51650 Poptr1|653199  
 Poptr1|342643,Poptr1|677701  
 AT2G35680 Poptr1|739994,Poptr1|693628  
 AT5G56610  
 AT2G48070 Poptr1|731966  
 AT4G00530,AT1G01725 Poptr1|572241  
 AT3G21110Poptr1|577382  
 Poptr1|109203  
 Poptr1|660633  
 Poptr1|660634,Poptr1|707563,Poptr1|108410,Poptr1|660635,Poptr1|642218  
 AT2G34680 Poptr1|550120  
 AT5G01510 Poptr1|695382  
 AT5G49820 Poptr1|60077  
 AT2G23470 Poptr1|76199  
 AT1G49170 Poptr1|595392  
 AT3G46960 Poptr1|723137  
 AT1G59760  
 AT2G06990 Poptr1|560690  
 Poptr1|672810,Poptr1|742573  
 Poptr1|586669  
 AT1G31160Poptr1|578724,Poptr1|666877  
 AT3G56490  
 AT2G27460 Poptr1|703555,Poptr1|697075  
 AT3G17740 Poptr1|97004  
 AT5G23610 Poptr1|97927,Poptr1|573610  
 AT1G27480 Poptr1|572020  
 Poptr1|347567  
 AT1G10300,AT1G50920

Poptr1|549253,Poptr1|722916  
 AT3G23860  
 AT1G77690 Poptr1|643656,Poptr1|694546  
 AT2G21050 Poptr1|694223,Poptr1|649249  
 AT5G01240  
 Poptr1|720153,Poptr1|659543  
 AT2G38120 Poptr1|576946,Poptr1|685718  
 Poptr1|574986  
 Poptr1|595499  
 Poptr1|107009  
 AT3G26932  
 AT5G41070 Poptr1|681351  
 Poptr1|555948,Poptr1|552983  
 AT3G62800 Poptr1|579567  
 Poptr1|581143,Poptr1|573957,Poptr1|107768,Poptr1|579566,Poptr1|571245  
 AT2G28380  
 Poptr1|595500,Poptr1|570943  
 AT4G30440 Poptr1|561380,Poptr1|578682  
 AT3G23820 Poptr1|597069,Poptr1|707167  
 AT1G02000,AT4G00110,AT2G45310 Poptr1|644324,Poptr1|663797,Poptr1|551765  
 AT4G12250 Poptr1|646482  
 Poptr1|662454  
 AT3G09250 Poptr1|667937,Poptr1|560849  
 AT2G42770 Poptr1|587772  
 Poptr1|586565  
 Poptr1|107510,Poptr1|581150,Poptr1|581300,Poptr1|107302,Poptr1|568399  
 Poptr1|107540  
 Poptr1|586232,Poptr1|583352,Poptr1|587269,Poptr1|568401,Poptr1|582005  
 Poptr1|588533,Poptr1|591255,Poptr1|579777,Poptr1|581824,Poptr1|586852,Poptr1|582628,Poptr1|57987  
 3  
 Poptr1|555905  
 Poptr1|585430,Poptr1|585222,Poptr1|593135,Poptr1|593384,Poptr1|586395  
 AT5G58210 Poptr1|584519  
 AT3G52170 Poptr1|567709  
 AT1G78110,AT1G22230 Poptr1|663764,Poptr1|643745,Poptr1|559121  
 AT1G14310  
 AT2G41250 Poptr1|717512,Poptr1|701322  
 AT1G72490,AT1G17400 Poptr1|553587,Poptr1|98986  
 Poptr1|589305  
 AT2G04340 Poptr1|64374,Poptr1|596325  
 AT4G02530 Poptr1|560592,Poptr1|669769  
 AT2G17440,AT4G35470 Poptr1|53282,Poptr1|558753  
 Poptr1|594919,Poptr1|348847  
 AT3G26500,AT1G12970 Poptr1|566013  
 Poptr1|349971,Poptr1|590314  
 AT1G69545  
 AT2G19330,AT4G29880 Poptr1|351644,Poptr1|578999  
 Poptr1|703999,Poptr1|356605  
 AT5G45510  
 AT3G11330,AT5G05850 Poptr1|700962  
 Poptr1|65292  
 AT4G26050  
 Poptr1|586615,Poptr1|588663,Poptr1|582110,Poptr1|595624,Poptr1|585925,Poptr1|590961,Poptr1|10652  
 4,Poptr1|588659  
 AT3G18165 Poptr1|574967  
 AT4G13670 Poptr1|547961  
 AT5G36880 Poptr1|572831  
 Poptr1|585243  
 AT1G15260,AT3G16070 Poptr1|553721,Poptr1|63994  
 AT3G24535 Poptr1|578461  
 AT2G45730 Poptr1|342171,Poptr1|559822  
 AT2G38710 Poptr1|594712,Poptr1|725410,Poptr1|697004  
 Poptr1|593708,Poptr1|353238,Poptr1|563565  
 Poptr1|556351  
 AT3G01060 Poptr1|577711  
 AT1G17145,AT1G78420 Poptr1|568608,Poptr1|550313  
 AT5G14250 Poptr1|688908,Poptr1|64917  
 AT2G04400  
 AT5G48220 Poptr1|573118  
 Poptr1|103648  
 AT1G43600,AT1G43610,AT3G50376,AT5G54210,AT1G20320,AT3G19600,AT2G04930,AT3G17550,AT2G02290,AT5  
 G23470,AT3G15330  
 AT5G58000 Poptr1|578761,Poptr1|578759,Poptr1|352323  
 AT4G01810 Poptr1|552616,Poptr1|700360,Poptr1|589764  
 AT3G24140 Poptr1|49263,Poptr1|701763  
 AT4G01460 Poptr1|348168,Poptr1|572471  
 AT3G06120 Poptr1|354942  
 AT3G61950,AT2G46810  
 AT5G46690 Poptr1|349897,Poptr1|590022  
 AT5G65320 Poptr1|51696,Poptr1|562549  
 AT5G53210 Poptr1|355213,Poptr1|100140  
 AT1G72210,AT1G22490 Poptr1|56592,Poptr1|347436

AT3G48250 Poptr1|57624  
AT3G02490,AT5G15980 Poptr1|545697,Poptr1|545694,Poptr1|580736  
AT1G19150 Poptr1|589310  
AT5G28450  
Poptr1|709740  
AT5G54270 Poptr1|582091,Poptr1|568973  
AT1G76570 Poptr1|694933  
AT1G29920,AT1G29910,AT1G29930,AT2G34420,AT2G34430 Poptr1|715461,Poptr1|652073,Poptr1|568456  
AT3G54890 Poptr1|724962,Poptr1|563752  
AT2G40100 Poptr1|686447  
AT1G15820 Poptr1|548759,Poptr1|682100  
AT3G47470 Poptr1|581377  
Poptr1|566307  
AT2G05100,AT2G05070,AT3G27690 Poptr1|341557,Poptr1|573081  
AT3G61470 Poptr1|548030,Poptr1|711741  
AT5G01530,AT3G08940 Poptr1|576961,Poptr1|560901  
AT1G45474 Poptr1|551858,Poptr1|591943  
AT4G10340 Poptr1|690128  
AT1G61520 Poptr1|573150  
AT5G17240 Poptr1|556031  
AT2G15820 Poptr1|581471,Poptr1|557336  
AT4G30150 Poptr1|556586  
AT1G29850  
Poptr1|586970  
AT1G11240Poptr1|568294,Poptr1|647711  
AT2G19450 Poptr1|717213,Poptr1|582936  
AT1G01730 Poptr1|575831  
Poptr1|644443,Poptr1|700219  
AT1G72440 Poptr1|60982  
AT4G03330  
AT2G18260 Poptr1|356963,Poptr1|563176  
AT1G08560 Poptr1|573879,Poptr1|571159  
Poptr1|562290  
Poptr1|557238,Poptr1|571186,Poptr1|583788  
AT3G03800  
AT5G08080 Poptr1|702442  
Poptr1|589047  
AT3G11820Poptr1|344415  
AT3G52400  
AT1G61290,AT1G11250 Poptr1|546380  
AT2G47910 Poptr1|578826,Poptr1|98727  
AT3G48560 Poptr1|666677  
Poptr1|587914,Poptr1|575365  
Poptr1|662159  
AT1G79610,AT1G54370 Poptr1|582347  
Poptr1|645459  
AT1G53640  
Poptr1|75544  
AT5G61660 Poptr1|580526,Poptr1|575517,Poptr1|588168  
AT2G21060,AT4G38680  
AT4G29030 Poptr1|553256  
AT1G77030  
Poptr1|550556  
AT4G01985  
AT1G62240  
AT4G15460 Poptr1|556614,Poptr1|54394  
AT4G15150  
Poptr1|109315  
AT1G74230,AT5G61030  
Poptr1|104706  
AT1G04660,AT4G29020  
Poptr1|351824,Poptr1|348615  
AT2G21660,AT4G39260 Poptr1|712972,Poptr1|722024  
AT2G14160 Poptr1|570936  
AT3G14480  
Poptr1|357033,Poptr1|71921,Poptr1|102141,Poptr1|102140  
Poptr1|72230  
Poptr1|354602  
Poptr1|104747  
AT1G15840 Poptr1|554852  
AT5G07530,AT5G07540 Poptr1|354081  
Poptr1|670089  
Poptr1|691718  
AT3G24250  
Poptr1|639993  
AT4G30450 Poptr1|578681,Poptr1|561381  
Poptr1|105667  
AT1G07135,AT3G04640,AT5G25425  
AT5G58470 Poptr1|683890,Poptr1|686786  
AT5G19960  
AT1G15830

AT3G44950  
AT4G16240 Poptr1|595503  
AT1G02710,AT5G40490,AT1G27710  
AT5G33390 Poptr1|704469  
AT3G55790  
AT1G04800 Poptr1|547957  
AT5G46730 Poptr1|590015  
Poptr1|595552  
Poptr1|76387  
AT1G11850  
Poptr1|669512  
Poptr1|547987,Poptr1|554816,Poptr1|692029  
AT2G11005  
Poptr1|593371,Poptr1|655827,Poptr1|563663,Poptr1|63971,Poptr1|63945,Poptr1|63960,Poptr1|597246,P  
optr1|63958,Poptr1|353314,Poptr1|353315  
AT4G30460  
AT1G76965  
AT2G30560 Poptr1|97667  
Poptr1|640608  
Poptr1|570937  
Poptr1|352529,Poptr1|595956  
Poptr1|692637  
Poptr1|549259  
AT3G15400  
Poptr1|675538,Poptr1|568046  
AT1G53625  
Poptr1|559203,Poptr1|551490  
Poptr1|349857,Poptr1|593836  
AT2G05510,AT2G05440,AT2G05380,AT2G05520,AT2G05530,AT2G05540  
Poptr1|63097  
Poptr1|106552  
AT2G17870,AT4G36020  
Poptr1|354022,Poptr1|659096  
Poptr1|592047  
Poptr1|63964  
AT3G42130  
Poptr1|101154  
AT1G75550  
AT5G16940 Poptr1|645200,Poptr1|552923,Poptr1|645201  
AT4G30600 Poptr1|737984,Poptr1|561342  
AT3G47390 Poptr1|738641  
Poptr1|597414  
Poptr1|563483,Poptr1|660080  
Poptr1|563484,Poptr1|679460  
AT1G16880  
AT5G04740 Poptr1|563581,Poptr1|725437  
AT3G61840,AT2G46535,AT4G27810 Poptr1|574735,Poptr1|569568  
AT2G03390 Poptr1|724077  
Poptr1|656491  
AT4G03260 Poptr1|739089,Poptr1|663562,Poptr1|702641  
AT1G78230 Poptr1|643773,Poptr1|651271  
AT1G63010  
AT4G22990,AT4G11810 Poptr1|640555,Poptr1|343599  
Poptr1|640556  
AT4G12340 Poptr1|350096,Poptr1|677333,Poptr1|683357  
Poptr1|640121  
AT5G13410 Poptr1|350531  
AT3G07270 Poptr1|553210,Poptr1|573397  
AT3G25430 Poptr1|572061,Poptr1|689601  
AT5G51740 Poptr1|575719,Poptr1|570554  
AT5G65690 Poptr1|719761  
Poptr1|684454  
AT4G37870  
AT4G16400 Poptr1|560209,Poptr1|575889  
AT3G13175 Poptr1|691823  
AT2G47780 Poptr1|572710,Poptr1|348233  
AT3G05500 Poptr1|579572,Poptr1|570793,Poptr1|744528  
AT1G67360 Poptr1|712615,Poptr1|548015  
AT3G32940 Poptr1|351034,Poptr1|547639  
AT3G50090,AT3G50100,AT5G67240,AT5G05540 Poptr1|591161,Poptr1|562926  
AT5G55220 Poptr1|575052  
AT3G20870 Poptr1|693189,Poptr1|690889  
AT1G15020,AT2G01270 Poptr1|345290,Poptr1|687169  
AT4G28540 Poptr1|72911,Poptr1|684614  
AT1G03930,AT5G44100  
AT4G08800,AT2G19470  
AT1G72710 Poptr1|561049,Poptr1|582934,Poptr1|553530  
Poptr1|701957,Poptr1|695040  
AT1G04440,AT5G43320  
Poptr1|571101



Poptr1|345452,Poptr1|687002  
AT4G26100,AT5G57015  
AT3G23340,AT4G14340  
AT4G28880,AT4G28860 Poptr1|689108  
AT4G14490,AT3G02400 Poptr1|564933,Poptr1|658402  
Poptr1|556994,Poptr1|713459  
AT5G25940  
Poptr1|707340,Poptr1|722258  
AT5G39400 Poptr1|577703  
Poptr1|719195  
AT3G19420 Poptr1|594404  
AT3G50110Poptr1|562929  
AT1G48325,AT5G26620 Poptr1|593709,Poptr1|565486  
AT3G18660 Poptr1|558398,Poptr1|562455  
AT1G54940,AT1G08990 Poptr1|662758,Poptr1|59992  
AT1G77130 Poptr1|651523  
AT4G33330 Poptr1|703114  
Poptr1|575898,Poptr1|716846  
AT1G27330,AT1G27350 Poptr1|690944,Poptr1|711867  
AT3G03710  
AT5G14580 Poptr1|64775  
AT5G49370,AT5G49380,AT3G06670  
AT5G49390 Poptr1|107767,Poptr1|354043,Poptr1|698305  
Poptr1|354044  
AT5G64850,AT5G09960 Poptr1|46718,Poptr1|654885  
AT5G19473 Poptr1|557714  
AT4G25230,AT5G51450 Poptr1|350052,Poptr1|581262  
AT5G65170,AT4G39720 Poptr1|559117,Poptr1|643748  
AT1G35830  
AT5G27220  
AT5G27330,AT3G05130 Poptr1|680378  
AT4G32190 Poptr1|561913  
Poptr1|104523  
AT4G31570,AT1G24460 Poptr1|589516  
AT1G06530 Poptr1|559470,Poptr1|551251  
AT1G05320,AT2G32240 Poptr1|717340,Poptr1|701255  
AT3G16000 Poptr1|548674  
Poptr1|686417  
Poptr1|704528  
AT3G58840  
AT2G36420,AT5G03670 Poptr1|676168  
AT5G08580 Poptr1|71762,Poptr1|53233  
AT4G27790 Poptr1|106150,Poptr1|574722  
Poptr1|669693  
AT2G25290,AT4G32070 Poptr1|561937  
AT1G62390 Poptr1|584736,Poptr1|568163  
AT4G30480 Poptr1|737912,Poptr1|653635  
AT5G20360  
AT3G23900 Poptr1|597062,Poptr1|65060  
AT5G09650 Poptr1|707491,Poptr1|557583  
AT4G01650 Poptr1|644716,Poptr1|572507  
AT4G20520,AT4G20700  
AT4G23170 Poptr1|544900,Poptr1|544904,Poptr1|544890,Poptr1|555405,Poptr1|555407,Poptr1|555409  
AT3G22060,AT3G58310  
Poptr1|594428,Poptr1|594440,Poptr1|594438,Poptr1|579237,Poptr1|562320,Poptr1|718499,Poptr1|56231  
6,Poptr1|594430,Poptr1|594437,Poptr1|562323,Poptr1|595145,Poptr1|562321  
Poptr1|544897,Poptr1|592405  
AT5G48540 Poptr1|349038  
Poptr1|544888,Poptr1|544903,Poptr1|568227  
AT2G31620,AT3G21960,AT3G21940,AT4G20670,AT3G21990,AT4G20610,AT4G20710,AT4G20560,AT4G20640,AT4  
G20530,AT4G20540,AT4G20620,AT4G20590,AT4G20600,AT4G20570,AT4G20630,AT4G20580,AT4G20550,AT4G20  
650,AT3G21980,AT3G22000,AT4G20680,AT3G22010,AT3G29040,AT3G21970,AT3G22030,AT3G22040,AT3G22050,  
AT3G22020,AT3G21930,AT3G21920,AT3G21910,AT3G21900,AT3G29050  
AT1G63550,AT1G63570,AT1G63600,AT1G63560,AT1G63590,AT1G63580,AT5G41290,AT5G41280,AT5G41300,AT1  
G61750 Poptr1|568395,Poptr1|592514,Poptr1|559538  
Poptr1|102421  
Poptr1|589753,Poptr1|594236,Poptr1|660367,Poptr1|107571,Poptr1|594239,Poptr1|108626  
AT5G64050  
Poptr1|589662  
Poptr1|587660  
Poptr1|561320  
AT2G28605 Poptr1|558460,Poptr1|75655  
AT5G24350 Poptr1|57457,Poptr1|355339  
AT1G51740 Poptr1|353623,Poptr1|567325  
AT4G14440,AT4G14430 Poptr1|108662,Poptr1|566113  
AT1G65520 Poptr1|563875  
Poptr1|589000  
AT1G55620 Poptr1|49520  
AT4G35440 Poptr1|595045  
AT1G55090 Poptr1|343709,Poptr1|63385  
AT5G41220,AT5G41210,AT5G41240 Poptr1|548476,Poptr1|684880,Poptr1|709375  
Poptr1|748052,Poptr1|693831,Poptr1|703319

AT5G52570,AT4G25700 Poptr1|709291  
 AT5G49400 Poptr1|564405,Poptr1|698306  
 AT3G23167,AT2G14935,AT3G04943,AT3G23165,AT3G04945 Poptr1|570946  
 Poptr1|574009  
 Poptr1|562771  
 Poptr1|64946  
 AT2G37910  
 Poptr1|591188  
 Poptr1|570155,Poptr1|700950  
 Poptr1|698807,Poptr1|344859  
 Poptr1|580737  
 Poptr1|572131  
 AT2G03670 Poptr1|356762  
 AT2G45500  
 AT1G03000  
 Poptr1|561335  
 AT4G27680 Poptr1|574694  
 AT3G56690 Poptr1|351379  
 Poptr1|699166  
 AT3G53230 Poptr1|689390,Poptr1|576706  
 AT2G34560 Poptr1|693998,Poptr1|588376  
 AT1G08270 Poptr1|548617  
 AT1G80350  
 Poptr1|584353,Poptr1|584560  
 Poptr1|582409,Poptr1|649132,Poptr1|592957  
 AT3G27120  
 AT3G01610 Poptr1|571847  
 Poptr1|548648  
 AT2G27600 Poptr1|54337,Poptr1|556731  
 AT3G09840,AT5G03340  
 AT5G08470 Poptr1|548616  
 AT5G53540  
 Poptr1|583833  
 AT3G06530  
 Poptr1|588769  
 AT3G57500 Poptr1|652733  
 AT2G26520 Poptr1|581478  
 AT1G52370,AT4G28360 Poptr1|735202  
 Poptr1|105243  
 AT5G48700,AT5G48710,AT5G55855,AT2G32765,AT5G55170  
 AT4G26840  
 AT5G55160  
 Poptr1|664794,Poptr1|711518,Poptr1|343015,Poptr1|665055  
 AT3G52260  
 Poptr1|353408  
 AT5G40480 Poptr1|64802  
 AT2G16790 Poptr1|738337  
 Poptr1|579913  
 Poptr1|347295,Poptr1|559195  
 AT1G11490  
 Poptr1|544970  
 AT5G54630,AT4G27240 Poptr1|699985,Poptr1|569056  
 AT1G75710 Poptr1|715429,Poptr1|692969  
 AT2G29660 Poptr1|641083  
 AT1G27595 Poptr1|643896  
 AT5G01400 Poptr1|576974  
 AT1G78540,AT1G17040 Poptr1|99463,Poptr1|65633  
 AT1G63050,AT1G12640 Poptr1|709442,Poptr1|343607  
 Poptr1|554697,Poptr1|683602  
 AT3G26740 Poptr1|572879  
 AT2G18410 Poptr1|580807,Poptr1|714034  
 AT5G01160Poptr1|560867  
 AT1G04690 Poptr1|681762  
 Poptr1|568139  
 AT4G23895 Poptr1|646756,Poptr1|640356  
 AT5G49010 Poptr1|564375  
 AT1G06150,AT2G31280 Poptr1|692890,Poptr1|559676  
 AT2G32600 Poptr1|676096,Poptr1|667866  
 AT5G03345 Poptr1|701527,Poptr1|589466  
 AT1G70220,AT1G24050  
 Poptr1|687123,Poptr1|721090  
 Poptr1|718124,Poptr1|668302  
 Poptr1|668301  
 AT3G19090 Poptr1|581475  
 AT5G46250 Poptr1|568442  
 AT2G43970  
 AT5G40660 Poptr1|549616  
 Poptr1|583225,Poptr1|352954  
 AT1G22015,AT1G77810 Poptr1|559172,Poptr1|692692  
 AT4G26940  
 AT1G32930 Poptr1|727295,Poptr1|550460  
 Poptr1|63460,Poptr1|684858

AT1G33430  
AT2G25300,AT4G32120 Poptr1|58575  
AT2G32430,AT1G05170 Poptr1|343034,Poptr1|732233  
AT1G11730Poptr1|546339  
AT1G53290,AT3G14960 Poptr1|660873,Poptr1|690331  
AT2G26100 Poptr1|596692,Poptr1|668818,Poptr1|561662  
AT5G53340 Poptr1|586581  
AT3G13050 Poptr1|718063,Poptr1|744742  
Poptr1|704855,Poptr1|584531,Poptr1|584521  
AT5G09480 Poptr1|582412,Poptr1|584576,Poptr1|562382,Poptr1|562381  
AT1G51690  
AT1G17720 Poptr1|577933,Poptr1|695086,Poptr1|592731,Poptr1|597671  
Poptr1|575190  
AT1G78280 Poptr1|643793  
Poptr1|643794,Poptr1|643792  
AT3G63510 Poptr1|557785,Poptr1|64537  
AT5G47970  
AT3G10850  
AT2G31350,AT1G06130  
AT2G43430 Poptr1|741505,Poptr1|718306  
Poptr1|581074  
Poptr1|106878  
AT4G20130 Poptr1|554613  
Poptr1|674016  
AT3G18580 Poptr1|699490  
AT3G45280  
AT3G09740 Poptr1|675004,Poptr1|589417,Poptr1|576674  
AT3G61450 Poptr1|731145  
AT5G49430 Poptr1|656659,Poptr1|659066  
Poptr1|723909  
AT2G47410 Poptr1|659065,Poptr1|656660  
Poptr1|659063,Poptr1|656662,Poptr1|57177  
Poptr1|659064  
Poptr1|723913  
AT4G10240  
AT2G31380,AT1G06040 Poptr1|718322,Poptr1|703465  
AT1G78600 Poptr1|699052  
AT1G75540 Poptr1|52191,Poptr1|550941  
AT4G39070 Poptr1|713096  
AT4G38960,AT2G21320 Poptr1|648693,Poptr1|697232,Poptr1|741174,Poptr1|563254  
AT5G63570,AT3G48730 Poptr1|581102,Poptr1|575404  
Poptr1|570311  
Poptr1|569634  
AT5G53580  
AT1G06690 Poptr1|551201,Poptr1|714933,Poptr1|714938  
Poptr1|548667,Poptr1|563849,Poptr1|57451  
AT5G54830 Poptr1|561973  
Poptr1|695515,Poptr1|578918  
AT5G52590  
Poptr1|571623  
AT5G64816 Poptr1|593067,Poptr1|651197,Poptr1|643870  
AT5G06220,AT3G11560 Poptr1|595164,Poptr1|561464,Poptr1|576552  
Poptr1|64049  
Poptr1|546563  
Poptr1|104447  
AT2G44065 Poptr1|654356  
Poptr1|586041,Poptr1|548197,Poptr1|107772  
Poptr1|747155  
AT1G60560 Poptr1|654649  
Poptr1|561811  
Poptr1|677628  
AT4G13970 Poptr1|677629,Poptr1|347794  
Poptr1|558413  
AT5G08030,AT1G74210 Poptr1|596420  
Poptr1|588486  
AT1G80600 Poptr1|705457,Poptr1|58315  
Poptr1|586613  
AT5G46180 Poptr1|698922  
Poptr1|71836  
AT1G20575 Poptr1|709812,Poptr1|652203  
AT4G13030 Poptr1|349015  
Poptr1|570468  
AT2G18370 Poptr1|60844,Poptr1|672717,Poptr1|558133  
AT2G15325 Poptr1|642611  
AT5G01870,AT3G08770  
AT4G33355  
Poptr1|577170,Poptr1|668195,Poptr1|555974,Poptr1|555975  
AT2G38540,AT2G38530,AT2G15050,AT3G51600  
Poptr1|560985,Poptr1|734312,Poptr1|668193,Poptr1|672382  
AT5G59310,AT5G59320,AT5G59330,AT3G51590  
Poptr1|705602,Poptr1|568169,Poptr1|664111  
AT3G01680

Poptr1|641699,Poptr1|580994,Poptr1|590322,Poptr1|670169,Poptr1|705601,Poptr1|108632,Poptr1|59577  
4,Poptr1|641694,Poptr1|588638,Poptr1|108758,Poptr1|585112,Poptr1|103585,Poptr1|641693,Poptr1|705493,Poptr1|7  
01780,Poptr1|64857  
Poptr1|355976  
AT1G67790,AT3G01670 Poptr1|671045,Poptr1|658236,Poptr1|565119  
AT5G48640,AT5G48630 Poptr1|553209,Poptr1|730608  
AT5G67370 Poptr1|553944  
AT5G11840Poptr1|561667  
Poptr1|673864,Poptr1|549657  
AT1G64750,AT5G45010  
AT2G37120,AT3G53370  
AT3G09735 Poptr1|576667,Poptr1|589410  
AT5G23570 Poptr1|545839,Poptr1|702355  
Poptr1|547736,Poptr1|547737,Poptr1|104178,Poptr1|350952,Poptr1|555132  
Poptr1|553448  
Poptr1|585433,Poptr1|555134,Poptr1|555133,Poptr1|555137,Poptr1|555135,Poptr1|555131,Poptr1|10754  
7  
Poptr1|580176  
AT2G41750 Poptr1|560511  
AT1G48610  
AT3G18035,AT1G48620 Poptr1|700853  
AT5G56740 Poptr1|571299,Poptr1|663183  
AT3G17020 Poptr1|698313  
AT3G53990 Poptr1|576865,Poptr1|695401  
AT3G03270 Poptr1|556085,Poptr1|689670  
Poptr1|687444,Poptr1|697021,Poptr1|584170  
AT3G11910,AT5G06600 Poptr1|576436,Poptr1|561195  
AT3G53790  
AT3G12560,AT5G13820 Poptr1|656113,Poptr1|659670  
AT5G59430,AT3G46590  
Poptr1|656112,Poptr1|706121,Poptr1|560771  
AT1G07540 Poptr1|641182,Poptr1|723257  
AT1G19990  
AT5G11600Poptr1|352773,Poptr1|668898  
AT3G19120 Poptr1|97490,Poptr1|557350  
AT5G53440 Poptr1|574762,Poptr1|661509  
AT1G20770 Poptr1|559965  
Poptr1|105955,Poptr1|343942  
AT4G25650  
AT3G44880  
Poptr1|647468  
Poptr1|555210  
Poptr1|558334,Poptr1|555211  
Poptr1|647467,Poptr1|555212  
Poptr1|558335,Poptr1|99159  
Poptr1|62705,Poptr1|639645  
AT5G64820 Poptr1|71735  
AT1G16850 Poptr1|567781  
AT1G22660 Poptr1|592255  
AT1G67635,AT1G27570,AT1G27590 Poptr1|551676  
AT5G50310 Poptr1|575296  
AT3G49550,AT5G24610 Poptr1|661641,Poptr1|688404  
AT4G14870 Poptr1|564847  
AT2G42040 Poptr1|352241,Poptr1|701389,Poptr1|352240  
Poptr1|576386  
AT5G02740 Poptr1|561532  
AT4G02830 Poptr1|559544,Poptr1|692832  
AT5G60690 Poptr1|741921  
AT4G32880 Poptr1|594266,Poptr1|58503,Poptr1|685537  
AT1G52150 Poptr1|48902,Poptr1|685007,Poptr1|584428  
AT2G34710,AT1G30490 Poptr1|707748,Poptr1|705160  
AT2G34520 Poptr1|592418,Poptr1|678862,Poptr1|591302  
Poptr1|562615,Poptr1|582817,Poptr1|562616  
AT5G40650,AT3G27380 Poptr1|681846  
AT5G65165  
Poptr1|663376,Poptr1|679014  
Poptr1|580297,Poptr1|595217,Poptr1|557279,Poptr1|694150  
AT1G51040,AT1G49340  
AT5G19050 Poptr1|565324  
Poptr1|680851  
Poptr1|550710  
Poptr1|550709  
Poptr1|596439  
AT3G27730 Poptr1|64772  
Poptr1|560020  
AT2G42270,AT1G20960 Poptr1|356048,Poptr1|575351  
AT5G61140Poptr1|596438  
AT4G28990 Poptr1|673156  
AT1G22040 Poptr1|643710,Poptr1|651336  
AT1G44760 Poptr1|643633,Poptr1|685288  
AT5G43140 Poptr1|572053  
AT4G33905,AT2G14860 Poptr1|65268,Poptr1|557492

AT5G19750  
AT3G20740 Poptr1|593495,Poptr1|688045  
AT3G03500,AT5G17570 Poptr1|571367  
AT5G13190 Poptr1|684797,Poptr1|690963,Poptr1|579781,Poptr1|679370  
AT3G56880,AT2G41010 Poptr1|576097,Poptr1|652520  
Poptr1|571829,Poptr1|571745  
AT2G20760 Poptr1|743775,Poptr1|555555  
AT2G40060 Poptr1|564001,Poptr1|659536,Poptr1|668013  
AT3G51890  
AT1G07645 Poptr1|49021  
AT5G50100 Poptr1|666419  
AT3G23100,AT1G61410 Poptr1|687073  
AT5G23535 Poptr1|647824  
AT1G13310 Poptr1|566661  
AT5G45040 Poptr1|678273,Poptr1|666852  
AT1G31350 Poptr1|60837  
AT5G08535,AT3G52350 Poptr1|563423  
AT1G04080 Poptr1|692004,Poptr1|730568  
AT5G46400  
AT2G21860 Poptr1|562732,Poptr1|650836  
AT5G08160 Poptr1|569832,Poptr1|742436  
AT1G53030,AT3G15352 Poptr1|660952,Poptr1|742995  
AT4G04970  
Poptr1|559489  
Poptr1|547670,Poptr1|560541  
AT2G36850  
AT3G07160 Poptr1|547668  
AT3G14570 Poptr1|568599  
AT4G03550 Poptr1|744957  
AT5G13000 Poptr1|693094,Poptr1|683537  
Poptr1|575290,Poptr1|688519,Poptr1|547673,Poptr1|106909  
AT3G59100,AT1G06490 Poptr1|559488,Poptr1|342328  
AT2G30680  
AT1G05570,AT2G31960,AT5G36870 Poptr1|704671  
Poptr1|651682  
Poptr1|639701  
AT2G13680 Poptr1|59928  
AT3G14780 Poptr1|547669  
AT2G21160,Poptr1|697211,Poptr1|556593  
AT2G16595  
AT2G32560,AT2G26850 Poptr1|706513,Poptr1|557709  
AT2G41170  
Poptr1|716944,Poptr1|701315  
AT5G52960 Poptr1|668095,Poptr1|661437  
AT3G48470 Poptr1|666601  
AT1G80940 Poptr1|62787,Poptr1|693199  
AT5G53350 Poptr1|687706,Poptr1|732873  
AT5G49840  
AT1G33360  
AT5G66510  
AT3G48680,AT5G63510 Poptr1|570284,Poptr1|733653  
AT1G19580 Poptr1|550998,Poptr1|715237,Poptr1|593915  
AT1G47260  
Poptr1|107204  
Poptr1|590492  
AT3G12640  
Poptr1|560706,Poptr1|570416  
Poptr1|656553  
AT2G47070,AT3G60030 Poptr1|731598,Poptr1|644912  
Poptr1|656555,Poptr1|656554  
Poptr1|577420  
AT4G26470 Poptr1|684108  
AT3G24110  
AT3G23370 Poptr1|354592,Poptr1|565778  
AT5G04210 Poptr1|557975,Poptr1|557976  
AT2G29580,AT1G07360,AT5G07060  
Poptr1|697606,Poptr1|557972  
AT1G18290 Poptr1|355471,Poptr1|575025  
Poptr1|566779  
AT3G20600,AT3G20590,AT3G20610 Poptr1|571486,Poptr1|569081,Poptr1|544879  
AT3G49720,AT5G65810 Poptr1|684013,Poptr1|649736  
Poptr1|347545  
Poptr1|574951,Poptr1|345822  
AT1G22950  
Poptr1|566550,Poptr1|696549  
AT5G43660,AT1G48700,AT1G48740,AT1G47940  
AT3G18210 Poptr1|561013,Poptr1|589617,Poptr1|661719  
Poptr1|589792  
AT1G78590 Poptr1|675419,Poptr1|99440  
AT2G05620 Poptr1|696356,Poptr1|658055  
AT2G04690 Poptr1|708172  
AT1G67060 Poptr1|545350

Poptr1|574910  
AT5G55940,AT5G51620 Poptr1|691841,Poptr1|65518  
AT5G03650,AT2G36390  
Poptr1|589574  
Poptr1|52264  
Poptr1|65425  
AT3G20440 Poptr1|49368  
Poptr1|65427  
AT2G27480 Poptr1|721319,Poptr1|594970  
Poptr1|717568,Poptr1|734873  
AT5G04170,AT3G10300  
AT3G12300 Poptr1|647349  
Poptr1|574202  
AT1G29700 Poptr1|566662,Poptr1|564500  
AT5G15550  
Poptr1|556411  
Poptr1|556410  
Poptr1|593783  
AT1G20310,AT1G76070 Poptr1|73097,Poptr1|550831  
Poptr1|578333  
Poptr1|578388  
AT4G31390 Poptr1|583162  
AT5G24970 Poptr1|578334  
AT1G71810 Poptr1|551258  
Poptr1|554833  
AT1G79600 Poptr1|693056  
Poptr1|551259  
AT3G24190 Poptr1|547970  
AT2G39190  
AT5G67350 Poptr1|349797,Poptr1|72079  
AT4G08170 Poptr1|558969  
AT5G16760 Poptr1|683134  
AT4G33770 Poptr1|722456  
Poptr1|356648,Poptr1|554032  
Poptr1|108826,Poptr1|584305  
AT1G09665  
Poptr1|574938  
AT4G16880 Poptr1|103365  
AT2G17055 Poptr1|588254  
Poptr1|591082,Poptr1|581008  
AT2G32140 Poptr1|107459  
AT1G52900 Poptr1|587422  
Poptr1|580416,Poptr1|580411,Poptr1|705231,Poptr1|574423,Poptr1|104641,Poptr1|574431,Poptr1|10334  
0,Poptr1|590932,Poptr1|581018  
Poptr1|670316  
AT1G27170,AT1G27180,AT5G46500 Poptr1|574939,Poptr1|345823,Poptr1|579259  
AT5G41740,AT5G41750,AT5G41540,AT5G41550,AT5G40910,AT1G64070,AT2G16870,AT1G63870,AT1G63880,AT1  
G63750,AT5G58120,AT5G38850,AT1G63730,AT1G63740,AT1G56510,AT1G56520,AT1G66090,AT5G49  
140,AT4G11170,AT5G18350,AT5G18370,AT5G18360,AT5G17970,AT1G69550,AT5G11250,AT2G14080,AT3G04220,  
AT5G38350,AT1G65850,AT5G38340,AT3G44630,AT3G44480,AT3G44400,AT3G44670,AT3G25510,AT5G44510,AT3  
G04210,AT5G46470,AT5G46450,AT5G40060,AT5G22690,AT4G08450,AT5G46490,AT1G31540,AT5G46270,AT5G46  
260,AT5G46520,AT5G46510,AT4G16920,AT4G16950,AT4G16860,AT4G16960,AT4G16940,AT4G16890,AT4G16900,  
AT5G51630,AT4G04110,AT1G57650,AT4G19500,AT4G16990  
Poptr1|596158  
Poptr1|573627,Poptr1|573554,Poptr1|75283,Poptr1|654352,Poptr1|718152,Poptr1|548096,Poptr1|573530,  
Poptr1|675386,Poptr1|573528,Poptr1|670305,Poptr1|573632,Poptr1|573552,Poptr1|738129,Poptr1|108360  
Poptr1|101049  
Poptr1|580419  
AT4G12020  
Poptr1|103211  
Poptr1|573649,Poptr1|573549,Poptr1|583828,Poptr1|584336,Poptr1|570504  
AT4G23515 Poptr1|108906,Poptr1|590313  
Poptr1|103511,Poptr1|573551,Poptr1|582175  
Poptr1|590964  
AT5G44920,AT1G57670  
Poptr1|665556  
AT1G72930 Poptr1|102246  
AT4G09360 Poptr1|581613  
Poptr1|568109,Poptr1|568118  
Poptr1|567703  
AT4G11340 Poptr1|103908  
Poptr1|588387  
Poptr1|581139,Poptr1|747135,Poptr1|670314,Poptr1|670309  
AT2G03300,AT2G03030 Poptr1|596963  
Poptr1|677187,Poptr1|580712  
AT1G51280,AT5G45000,AT5G45220,AT5G45080,AT5G45070,AT1G65390,AT5G44900  
Poptr1|595618,Poptr1|593668,Poptr1|590316,Poptr1|105895,Poptr1|595305,Poptr1|109095,Poptr1|59095  
6,Poptr1|703703,Poptr1|588662  
AT1G57850  
AT5G44910  
Poptr1|588922,Poptr1|665169,Poptr1|104433,Poptr1|670304,Poptr1|101038,Poptr1|106349  
Poptr1|582737,Poptr1|583892,Poptr1|546504,Poptr1|596219,Poptr1|595632,Poptr1|595611,Poptr1|59154

8,Poptr1|595306,Poptr1|104702,Poptr1|677450,Poptr1|101498,Poptr1|680445,Poptr1|579825,Poptr1|101201,Poptr1|574427,Poptr1|580409,Poptr1|580410,Poptr1|61593,Poptr1|590931,Poptr1|574422,Poptr1|585367,Poptr1|574429,Poptr1|103339,Poptr1|96858,Poptr1|580408,Poptr1|590928,Poptr1|588490,Poptr1|582919,Poptr1|587555,Poptr1|579412,Poptr1|579108,Poptr1|580691,Poptr1|584600,Poptr1|582803,Poptr1|579593,Poptr1|595633,Poptr1|583423,Poptr1|558406,Poptr1|65472,Poptr1|594667,Poptr1|581999  
Poptr1|106781,Poptr1|65170,Poptr1|105421  
AT5G47280  
AT1G19960 Poptr1|581174  
AT4G19515,AT4G19470,AT4G23510  
AT5G45230,AT2G17060,AT4G36150,AT5G45200,AT5G45060,AT5G45250,AT3G51570,AT4G19530,AT5G17880,AT5G44870,AT4G19510,AT4G12010  
Poptr1|579982,Poptr1|545040  
Poptr1|101055,Poptr1|597227,Poptr1|703248,Poptr1|574424,Poptr1|596614  
Poptr1|559518,Poptr1|342313  
AT4G03750 Poptr1|581615  
Poptr1|660288  
Poptr1|552922,Poptr1|108141,Poptr1|597249,Poptr1|660286,Poptr1|348761,Poptr1|645738  
Poptr1|665555,Poptr1|571593,Poptr1|101387,Poptr1|665230,Poptr1|548095,Poptr1|671505,Poptr1|590781,Poptr1|97570  
Poptr1|106441,Poptr1|676845,Poptr1|579231,Poptr1|579133,Poptr1|107266,Poptr1|592389,Poptr1|105827,Poptr1|101045,Poptr1|593367,Poptr1|583899,Poptr1|588401,Poptr1|583893,Poptr1|597020,Poptr1|587430,Poptr1|587427,Poptr1|587421,Poptr1|101042,Poptr1|587434,Poptr1|100510,Poptr1|705127,Poptr1|584326,Poptr1|582813  
AT5G36930 Poptr1|594780,Poptr1|75664,Poptr1|547803  
AT1G57830  
Poptr1|670308  
Poptr1|579981  
AT2G20145 Poptr1|108961  
Poptr1|100540,Poptr1|576698  
Poptr1|101040,Poptr1|100522,Poptr1|100511,Poptr1|587433,Poptr1|98878  
Poptr1|675721  
AT2G17050,AT1G57630 Poptr1|60216,Poptr1|100508,Poptr1|343067  
AT1G60320 Poptr1|593160  
Poptr1|568942,Poptr1|703971,Poptr1|592390  
AT4G19925,AT4G19920,AT4G19910  
Poptr1|580418,Poptr1|108992,Poptr1|574434,Poptr1|588388,Poptr1|101987  
Poptr1|587437,Poptr1|596161,Poptr1|587439,Poptr1|97025,Poptr1|587435,Poptr1|103366,Poptr1|571594,  
Poptr1|588403,Poptr1|107579,Poptr1|596129  
AT1G61105Poptr1|675022  
Poptr1|570278,Poptr1|654353,Poptr1|558405,Poptr1|106651,Poptr1|104895,Poptr1|55720  
AT1G47370  
AT5G38344 Poptr1|597248  
AT4G09430,AT1G72840,AT1G17600,AT5G40100,AT1G72860,AT5G48770,AT1G72920,AT1G72940,AT1G72950,AT1G72900,AT1G72910,AT1G17615,AT1G72890,AT4G09420,AT1G72850,AT5G48780,AT1G17610,AT5G40090,AT1G72870  
Poptr1|573628  
Poptr1|588398  
Poptr1|581019,Poptr1|573553  
Poptr1|580152,Poptr1|56627,Poptr1|594350  
AT5G45260,AT5G45050,AT4G36140,AT5G45210,AT3G51560,AT4G19520,AT5G45240  
AT4G16930 Poptr1|680747  
AT5G17680  
Poptr1|581005,Poptr1|574150,Poptr1|590423,Poptr1|107864,Poptr1|574149,Poptr1|581003,Poptr1|582801  
AT3G63250 Poptr1|559589,Poptr1|342292  
AT3G22740 Poptr1|658494,Poptr1|345414  
AT3G25900 Poptr1|698241  
AT3G19040,AT1G32750 Poptr1|736035,Poptr1|718531  
AT1G26590,AT1G26610 Poptr1|353919,Poptr1|566941,Poptr1|545981  
AT4G15520 Poptr1|686172  
Poptr1|735924,Poptr1|560941  
AT5G53480 Poptr1|732844,Poptr1|687711  
AT3G13740,AT1G55140 Poptr1|592753,Poptr1|683315  
AT5G17380 Poptr1|685092  
AT2G47480 Poptr1|572643  
AT3G62640  
AT3G05725 Poptr1|581939,Poptr1|594026,Poptr1|581938,Poptr1|570732  
AT5G11970Poptr1|352653  
AT1G72720  
Poptr1|703926,Poptr1|553531,Poptr1|717582  
Poptr1|654919  
AT4G09890 Poptr1|551296,Poptr1|559411  
AT2G19460  
AT3G13910  
AT4G22380,AT5G20160,AT4G12600  
Poptr1|738881,Poptr1|592198  
AT1G07030,AT2G30160 Poptr1|64703,Poptr1|649793,Poptr1|577051  
AT1G34065  
AT1G78180 Poptr1|559110  
AT5G46800  
AT1G25380  
AT1G74240  
Poptr1|594118

AT2G33820 Poptr1|545275,Poptr1|60423  
Poptr1|551284  
AT1G07025 Poptr1|592801  
AT4G11440Poptr1|554371  
AT3G51870 Poptr1|562596  
AT2G37890,AT3G53940  
AT5G66380 Poptr1|76357  
AT3G21390  
AT4G26180 Poptr1|695311  
Poptr1|690001,Poptr1|689478  
AT3G55640 Poptr1|686468,Poptr1|55514,Poptr1|576855,Poptr1|344271  
AT3G20240 Poptr1|655635  
Poptr1|579828,Poptr1|72637  
AT5G64970  
AT1G14560 Poptr1|344611  
AT5G48970 Poptr1|54950,Poptr1|581798  
Poptr1|562595  
AT4G01100Poptr1|552249,Poptr1|731262,Poptr1|640384,Poptr1|646728  
AT5G42130 Poptr1|559351  
AT4G32400 Poptr1|561876,Poptr1|58552  
AT1G79900 Poptr1|705708,Poptr1|343348  
AT5G01500 Poptr1|576964,Poptr1|344303  
AT2G47490 Poptr1|572659,Poptr1|348298  
Poptr1|345273,Poptr1|55256  
AT4G39460 Poptr1|716001  
AT3G58510,AT2G42520,AT3G58570 Poptr1|711969,Poptr1|547630  
AT3G02065 Poptr1|731997  
Poptr1|108751,Poptr1|97269,Poptr1|595184  
AT1G31970 Poptr1|711852  
AT3G19760  
Poptr1|574468  
AT4G15850 Poptr1|713033  
AT1G16280 Poptr1|564184  
Poptr1|717593,Poptr1|576413  
AT3G06980 Poptr1|725594  
Poptr1|108108,Poptr1|574873  
AT5G26742 Poptr1|581575  
AT1G71280,AT1G71370,AT5G05450  
AT2G07750,AT1G63250 Poptr1|554333,Poptr1|691147  
AT3G22310,AT3G22330 Poptr1|695633  
AT3G09720 Poptr1|581044  
AT4G33370  
AT3G13920,AT1G54270  
AT1G55150 Poptr1|689651  
Poptr1|670178  
AT3G18600  
AT3G06480 Poptr1|566897  
AT1G51380  
Poptr1|354639  
AT1G59990  
Poptr1|106876  
AT2G33730  
AT4G09730 Poptr1|52051  
Poptr1|674047,Poptr1|640525,Poptr1|678765  
AT3G53110Poptr1|589531  
Poptr1|723070,Poptr1|64274  
Poptr1|354849  
AT4G34910 Poptr1|563188  
AT5G60990 Poptr1|352874,Poptr1|53266  
AT1G72730  
AT2G40700 Poptr1|574123  
Poptr1|558706,Poptr1|695977  
Poptr1|346677  
AT3G16840 Poptr1|697907  
AT5G08620,AT5G08610,AT5G63630 Poptr1|572384,Poptr1|692362  
AT2G47330 Poptr1|552542  
AT5G62190 Poptr1|575720,Poptr1|356338  
AT1G12770 Poptr1|548447,Poptr1|646579  
AT4G00660  
AT3G61240,AT2G45810  
Poptr1|581576  
Poptr1|677351  
Poptr1|107416,Poptr1|106780,Poptr1|567220  
AT5G54910 Poptr1|571554  
Poptr1|704330  
AT1G77050 Poptr1|694598  
Poptr1|353725  
Poptr1|571675  
AT4G16630 Poptr1|73062  
AT5G51280 Poptr1|597033,Poptr1|60053  
Poptr1|705647



Poptr1|561633,Poptr1|577856,Poptr1|597666,Poptr1|596670,Poptr1|685066  
AT5G11200,AT5G11170 Poptr1|654133,Poptr1|578196  
AT5G63120 Poptr1|570124,Poptr1|700956  
Poptr1|665923,Poptr1|571918  
AT5G65900  
Poptr1|731051,Poptr1|342744  
AT3G09620,AT1G20920 Poptr1|715705,Poptr1|550718  
AT5G14610,AT3G01540 Poptr1|64784  
Poptr1|569725,Poptr1|575020  
AT5G19210 Poptr1|726622  
AT4G00310 Poptr1|63896,Poptr1|347995,Poptr1|572288  
AT5G60540 Poptr1|723563  
AT2G42120 Poptr1|576259,Poptr1|352251  
AT2G37960,AT3G54060 Poptr1|576900,Poptr1|351856  
Poptr1|644622,Poptr1|553453,Poptr1|348124,Poptr1|586447  
AT3G61870 Poptr1|572435  
AT1G74880 Poptr1|654643  
AT5G55620,AT3G09950  
AT3G11405  
Poptr1|572357,Poptr1|572356,Poptr1|711149,Poptr1|569477,Poptr1|554457  
Poptr1|560207  
Poptr1|597048,Poptr1|65104  
AT3G55570  
AT5G06010 Poptr1|353011  
AT3G60350,AT2G44900 Poptr1|692485,Poptr1|677699  
AT2G14635 Poptr1|571287  
Poptr1|48639  
AT5G51540 Poptr1|575680,Poptr1|575681  
AT5G24850 Poptr1|98466  
AT4G10760 Poptr1|63366  
AT1G78380,AT1G78360,AT1G17170,AT1G17180,AT1G78370,AT1G78340,AT1G78320,AT1G17190,AT3G43800  
Poptr1|351698,Poptr1|739015,Poptr1|568835,Poptr1|568837,Poptr1|585834  
AT2G29480,AT2G29490,AT2G29460,AT2G29470,AT2G29440,AT2G29450,AT2G29420  
AT5G62480 Poptr1|354304,Poptr1|59850  
Poptr1|642449  
AT3G09270 Poptr1|688805  
Poptr1|579822,Poptr1|569773  
Poptr1|107736,Poptr1|560270,Poptr1|576045,Poptr1|56757,Poptr1|105561,Poptr1|596215,Poptr1|597447,  
Poptr1|568838,Poptr1|719987,Poptr1|588945,Poptr1|569772,Poptr1|574962,Poptr1|107903,Poptr1|565860,Poptr1|65  
8120,Poptr1|658116,Poptr1|677565,Poptr1|565029,Poptr1|657352,Poptr1|657350,Poptr1|576992,Poptr1|565861,Poptr  
1|658118,Poptr1|567710,Poptr1|696343,Poptr1|597354,Poptr1|345484,Poptr1|553271,Poptr1|726029,Poptr1|565863,  
Poptr1|658122  
AT1G27140,AT1G27130,AT1G69920,AT1G69930  
AT1G53680 Poptr1|108059,Poptr1|545541,Poptr1|556042  
Poptr1|98383  
Poptr1|550400,Poptr1|550393,Poptr1|65698,Poptr1|550402,Poptr1|596607,Poptr1|550394,Poptr1|550397,  
Poptr1|49443,Poptr1|550403,Poptr1|691894,Poptr1|687630,Poptr1|707894,Poptr1|65696,Poptr1|671156,Poptr1|5504  
01  
AT1G59670,AT1G59700  
AT1G10370,AT1G10360 Poptr1|587490,Poptr1|565410  
Poptr1|569150,Poptr1|569148,Poptr1|569153,Poptr1|569151,Poptr1|569149,Poptr1|597223,Poptr1|66089  
6,Poptr1|568836,Poptr1|585833,Poptr1|705669,Poptr1|670248,Poptr1|583059  
AT1G74590  
AT1G59610,AT1G10290 Poptr1|583471,Poptr1|596773  
Poptr1|571595  
Poptr1|743875  
AT5G14350  
Poptr1|575562,Poptr1|575563,Poptr1|575544,Poptr1|575533,Poptr1|575545,Poptr1|575541,Poptr1|64871  
AT5G15570,AT3G02160 Poptr1|577762,Poptr1|545957  
AT4G34340 Poptr1|589467  
Poptr1|575587  
AT2G39440 Poptr1|597296,Poptr1|586752  
AT2G02000,AT2G02010 Poptr1|345354  
AT5G17330  
AT3G17720 Poptr1|678573,Poptr1|648236  
AT1G65960 Poptr1|678571,Poptr1|556087,Poptr1|556086  
AT3G17760 Poptr1|699634  
AT4G22320 Poptr1|673634,Poptr1|698849  
AT5G55210 Poptr1|691791  
AT3G27520 Poptr1|549569  
AT2G36930 Poptr1|683182,Poptr1|735526  
Poptr1|585292  
Poptr1|104762  
AT2G17820 Poptr1|593825,Poptr1|349849,Poptr1|106681  
AT1G27320 Poptr1|684787,Poptr1|708748  
AT2G01830 Poptr1|55187,Poptr1|354326  
AT5G35750 Poptr1|573077  
Poptr1|584198  
AT4G00450 Poptr1|552172  
AT5G53220 Poptr1|100142  
Poptr1|561494

Poptr1|677763  
Poptr1|552055,Poptr1|700158  
AT3G60820  
AT2G31840 Poptr1|718112  
AT4G28590  
AT5G51960 Poptr1|659816,Poptr1|696926  
AT2G40840 Poptr1|695619,Poptr1|576090  
AT5G60210  
AT3G53350,AT2G37080 Poptr1|576652  
Poptr1|570114  
AT3G01560,AT5G14540 Poptr1|64768  
AT4G27510 Poptr1|545829  
Poptr1|584252  
Poptr1|589621  
AT1G66860,AT5G38200 Poptr1|105537,Poptr1|566575,Poptr1|553067  
AT1G15040  
Poptr1|694143,Poptr1|557298  
AT3G18890  
AT5G63960 Poptr1|71550  
AT4G39880 Poptr1|71639  
AT2G33255 Poptr1|54989  
AT5G01700 Poptr1|560958,Poptr1|577088  
AT3G02750 Poptr1|675264,Poptr1|574070,Poptr1|596965  
Poptr1|565513,Poptr1|565514  
AT1G03590  
AT5G26010,AT4G32950 Poptr1|736797,Poptr1|561696  
AT3G16800  
AT4G03415 Poptr1|580372,Poptr1|730501  
AT5G36250  
AT3G05640,AT5G27930 Poptr1|729480,Poptr1|704418  
AT1G16220,AT1G79630 Poptr1|694001,Poptr1|66016  
Poptr1|668461  
AT3G01480 Poptr1|577518,Poptr1|64734  
AT3G58000,AT2G42140 Poptr1|561257,Poptr1|576261,Poptr1|583299,Poptr1|650341  
AT3G60090,AT2G44340  
AT4G15930 Poptr1|596123  
AT2G18500 Poptr1|563128  
Poptr1|576532,Poptr1|653680,Poptr1|594956  
Poptr1|573247  
AT2G32840,AT1G04930 Poptr1|583289  
Poptr1|551949  
AT3G60370  
Poptr1|585022  
AT4G16380,AT1G51090,AT1G49420  
Poptr1|560219,Poptr1|590992,Poptr1|575885,Poptr1|103346,Poptr1|351250,Poptr1|652445,Poptr1|35125  
9,Poptr1|560226,Poptr1|560230,Poptr1|596281,Poptr1|590991,Poptr1|351264,Poptr1|579371,Poptr1|585212  
AT1G64350 Poptr1|548356,Poptr1|554473  
AT3G07100 Poptr1|55555,Poptr1|696892  
AT4G32640,AT3G44340 Poptr1|595463,Poptr1|729791  
Poptr1|347244  
AT5G18480 Poptr1|699864  
AT1G31814,AT5G16320 Poptr1|552423  
AT5G27230  
Poptr1|746807  
AT4G00650 Poptr1|575499  
AT5G48385 Poptr1|573179,Poptr1|710332  
Poptr1|102497  
AT1G74340 Poptr1|702943  
AT2G09990,AT5G18380,AT3G04230  
Poptr1|720829,Poptr1|726607,Poptr1|691732  
AT5G44320,AT4G20980 Poptr1|545291,Poptr1|670999  
AT2G25800 Poptr1|561747,Poptr1|668894  
AT4G11670Poptr1|691152  
AT1G04470,AT2G33420 Poptr1|54974,Poptr1|564974  
AT5G06970 Poptr1|708460  
Poptr1|578052  
AT2G20010 Poptr1|58668  
AT1G32460 Poptr1|670421,Poptr1|683190  
Poptr1|573224  
AT3G22840,AT4G14690 Poptr1|583545,Poptr1|720964,Poptr1|564883  
AT1G76450 Poptr1|715685  
AT4G16146 Poptr1|354053,Poptr1|659041  
AT1G69510  
Poptr1|698403  
AT5G64130 Poptr1|580461,Poptr1|745745,Poptr1|673566  
Poptr1|105718,Poptr1|571525,Poptr1|571526  
Poptr1|571535  
AT1G50830,AT5G18510,AT4G16050  
Poptr1|571528,Poptr1|571533,Poptr1|571532,Poptr1|571530,Poptr1|571527  
AT5G66440 Poptr1|593908,Poptr1|563191  
AT4G34560 Poptr1|546091  
AT5G13610 Poptr1|696917

AT1G69380 Poptr1|696691,Poptr1|566971  
 AT4G09620 Poptr1|574285,Poptr1|592231  
 AT5G41760 Poptr1|709200,Poptr1|684856  
 AT4G35335 Poptr1|735766  
 AT1G42470 Poptr1|694907  
 AT4G38350 Poptr1|721264  
 AT1G30360 Poptr1|550129  
 AT1G32090 Poptr1|689506,Poptr1|349959  
 AT4G02900  
 AT4G04340,AT4G22120 Poptr1|747904,Poptr1|690468,Poptr1|687468,Poptr1|584709  
 AT3G54510 Poptr1|555011  
 AT4G15430,AT3G21620 Poptr1|343022  
 AT1G62320,AT1G11960  
 AT1G58520,AT1G10090 Poptr1|692571  
 AT3G01100Poptr1|712840  
 AT1G69450 Poptr1|687256,Poptr1|696698  
 AT3G07230 Poptr1|709977,Poptr1|573350  
 AT4G37030 Poptr1|76128  
 AT4G12680  
 AT3G27390,AT5G40640 Poptr1|64870  
 Poptr1|76198  
 Poptr1|563767,Poptr1|567575  
 AT5G60410 Poptr1|723519,Poptr1|703590  
 AT5G11330Poptr1|352871,Poptr1|689029  
 AT2G45670 Poptr1|572156,Poptr1|347905  
 AT1G27530 Poptr1|681958  
 AT5G02440 Poptr1|697655,Poptr1|549181,Poptr1|560753  
 Poptr1|694406  
 AT2G38330 Poptr1|577058  
 AT3G08040 Poptr1|64554,Poptr1|722781  
 AT1G51340 Poptr1|722929  
 Poptr1|576335  
 AT4G38380 Poptr1|556998,Poptr1|713451  
 AT3G52110Poptr1|641368,Poptr1|649963  
 Poptr1|351561  
 AT3G54750 Poptr1|576451,Poptr1|352178  
 Poptr1|567228  
 AT2G17780,AT4G35920 Poptr1|689690  
 Poptr1|641125  
 AT2G29540  
 AT3G21260 Poptr1|573949  
 Poptr1|684616  
 AT2G33470  
 Poptr1|720197,Poptr1|565782  
 AT1G21360 Poptr1|347151,Poptr1|559343  
 Poptr1|684703,Poptr1|639722  
 AT5G06770,AT3G12130 Poptr1|576266,Poptr1|344460  
 AT1G68185 Poptr1|566557  
 AT1G75150  
 AT5G66540 Poptr1|345947,Poptr1|700935  
 AT2G32850 Poptr1|672679  
 AT1G31940,AT2G35585  
 Poptr1|349947  
 AT4G39900 Poptr1|75719,Poptr1|558531  
 AT1G32400 Poptr1|589970  
 AT2G20740 Poptr1|730478,Poptr1|690032  
 AT4G28770,AT2G20230 Poptr1|711517  
 Poptr1|580887,Poptr1|545316  
 Poptr1|583267  
 Poptr1|578104,Poptr1|352802  
 AT3G25590 Poptr1|566710,Poptr1|354068  
 Poptr1|589863,Poptr1|349735  
 AT1G02030 Poptr1|342678  
 AT5G61470  
 AT3G60580,AT2G45120  
 Poptr1|590167  
 AT4G16610  
 AT4G17550 Poptr1|349791,Poptr1|589909  
 AT2G13100 Poptr1|578821  
 Poptr1|583339,Poptr1|552752  
 AT3G47420 Poptr1|97399,Poptr1|590185,Poptr1|343548  
 AT1G30560,AT4G25220  
 Poptr1|63261  
 AT3G03880 Poptr1|571202,Poptr1|573929  
 Poptr1|736806,Poptr1|695070  
 AT1G55340 Poptr1|555192,Poptr1|639620  
 AT5G39590 Poptr1|346719,Poptr1|694829  
 AT4G27090,AT2G20450 Poptr1|709905,Poptr1|715219,Poptr1|697874,Poptr1|564957  
 AT2G46560  
 Poptr1|684311  
 AT4G12070 Poptr1|554939,Poptr1|693195,Poptr1|62988  
 AT2G06925 Poptr1|652826,Poptr1|578958

Poptr1|553673  
 AT4G09800,AT1G22780,AT1G34030 Poptr1|559418  
 Poptr1|551290  
 Poptr1|551289  
 Poptr1|643293,Poptr1|651776  
 AT4G30720 Poptr1|578714  
 Poptr1|569103  
 AT2G24410  
 AT3G20550  
 AT3G52240 Poptr1|563625  
 AT5G54260 Poptr1|582089,Poptr1|582090  
 AT4G25845 Poptr1|580481,Poptr1|580483  
 Poptr1|587247  
 AT3G56160 Poptr1|353260  
 AT1G01840 Poptr1|552108  
 AT4G24270 Poptr1|596792  
 AT3G08505 Poptr1|722758,Poptr1|706432  
 Poptr1|714553  
 AT4G10140,AT1G33490 Poptr1|646002,Poptr1|730426  
 AT5G06650,AT3G58070 Poptr1|576400  
 AT3G18440 Poptr1|60041  
 Poptr1|566647  
 AT1G18420  
 Poptr1|693404,Poptr1|48707  
 AT2G17470,AT1G68600,AT1G25480 Poptr1|354152  
 AT5G15390 Poptr1|545877  
 AT1G03630 Poptr1|571754  
 AT5G54190,AT4G27440 Poptr1|568934,Poptr1|670102  
 Poptr1|673337,Poptr1|716609,Poptr1|643659  
 AT1G77710  
 Poptr1|699483  
 Poptr1|673915  
 AT1G18460,AT1G73920  
 AT3G55830 Poptr1|698516,Poptr1|686452  
 AT4G09010 Poptr1|716457  
 AT4G24140 Poptr1|683631,Poptr1|350420  
 AT1G64670,AT5G41900  
 AT5G17780,AT5G17720  
 AT5G12930 Poptr1|62987,Poptr1|350778  
 Poptr1|587648,Poptr1|554945  
 AT2G18915  
 AT1G51550 Poptr1|563452  
 AT5G57360 Poptr1|589736,Poptr1|690044,Poptr1|58690  
 AT5G23410,AT1G68050 Poptr1|687137,Poptr1|345333  
 AT5G16090  
 AT5G38470  
 AT1G16190,AT1G79650 Poptr1|350961,Poptr1|62809  
 AT3G02540 Poptr1|704158,Poptr1|685099,Poptr1|354162,Poptr1|698245  
 AT5G61780,AT5G07350 Poptr1|570388,Poptr1|688569  
 Poptr1|673711  
 AT1G17290,AT1G72330 Poptr1|684996,Poptr1|584163  
 AT1G70580,AT1G23310 Poptr1|565169,Poptr1|687054  
 AT4G22970 Poptr1|553459  
 Poptr1|553458  
 AT5G28550  
 AT4G24300 Poptr1|553457  
 Poptr1|345750,Poptr1|552313,Poptr1|574703,Poptr1|355338,Poptr1|552314,Poptr1|572431  
 AT1G68940 Poptr1|354098  
 Poptr1|547841,Poptr1|555010  
 Poptr1|548123  
 AT1G76390,AT1G20780 Poptr1|550752,Poptr1|593178,Poptr1|559967  
 Poptr1|572430  
 AT1G21710 Poptr1|72485  
 Poptr1|555195  
 AT1G55325 Poptr1|547594,Poptr1|555194  
 AT3G12590  
 Poptr1|659713  
 Poptr1|656065,Poptr1|656066,Poptr1|659712,Poptr1|656064  
 AT5G57450  
 AT3G22880 Poptr1|564887,Poptr1|55104  
 AT5G20850 Poptr1|589354  
 AT2G28560  
 AT3G45090,AT5G60760 Poptr1|703606  
 Poptr1|353368  
 Poptr1|589759  
 AT2G45290,AT3G60750 Poptr1|730853,Poptr1|552034  
 AT1G24310 Poptr1|726047,Poptr1|345487  
 AT1G16720 Poptr1|563365,Poptr1|582198  
 AT1G70820 Poptr1|686300  
 Poptr1|107098  
 AT5G17530 Poptr1|698665,Poptr1|563738  
 AT4G39300 Poptr1|556464,Poptr1|697274

AT1G14205 Poptr1|564209  
AT1G48350 Poptr1|581561,Poptr1|725595  
AT3G10070 Poptr1|560743  
AT1G17440 Poptr1|63673,Poptr1|349460  
AT1G35860  
AT3G46740 Poptr1|683615,Poptr1|712674  
AT1G35880  
AT4G09080 Poptr1|680636,Poptr1|576267  
AT2G05990 Poptr1|684702,Poptr1|639726  
AT2G32060,AT1G15930 Poptr1|107708,Poptr1|712601,Poptr1|63035,Poptr1|551211,Poptr1|682166  
Poptr1|568982  
AT3G20630 Poptr1|568981,Poptr1|582070  
AT2G19240,AT4G29950,AT5G57210 Poptr1|58821,Poptr1|344200  
Poptr1|353556  
AT3G12530  
AT4G18740 Poptr1|568684,Poptr1|555653  
AT4G00790  
AT4G00800 Poptr1|572465  
AT1G28395 Poptr1|647942,Poptr1|677572,Poptr1|580943  
AT2G20585 Poptr1|594642,Poptr1|654393  
AT5G28030,AT5G28020,AT3G04940  
Poptr1|590257,Poptr1|595472,Poptr1|595469,Poptr1|703648,Poptr1|107246,Poptr1|570971  
Poptr1|592803  
AT3G61440 Poptr1|552184,Poptr1|552183,Poptr1|572275  
Poptr1|570972  
AT3G03630 Poptr1|745033  
AT2G43750,AT3G59760 Poptr1|703646,Poptr1|673917,Poptr1|662872,Poptr1|345408  
Poptr1|644477  
Poptr1|586625  
AT1G55880 Poptr1|707666  
AT3G22460,AT4G14880 Poptr1|105545  
AT5G48545 Poptr1|684143  
AT5G42740 Poptr1|696573  
Poptr1|55952,Poptr1|742956  
AT3G15240,AT3G15230  
AT5G53900 Poptr1|652295  
AT2G31650,AT1G05830 Poptr1|572888,Poptr1|343045  
AT1G76850,AT1G21170 Poptr1|694623,Poptr1|347131  
Poptr1|695109  
AT1G21312,AT1G76940 Poptr1|643505  
Poptr1|569593,Poptr1|574709  
Poptr1|735828,Poptr1|560910  
Poptr1|701611  
AT2G38180 Poptr1|555710,Poptr1|576967,Poptr1|591009,Poptr1|591008,Poptr1|693968,Poptr1|687573  
AT3G11210,Poptr1|698501,Poptr1|564018  
AT5G62930 Poptr1|728841  
AT5G45920 Poptr1|570397  
Poptr1|72638  
AT5G50920  
AT4G14670  
AT5G15450 Poptr1|556348,Poptr1|577716  
AT5G51070 Poptr1|588190,Poptr1|570396,Poptr1|733832,Poptr1|570399  
Poptr1|717883  
Poptr1|107945  
AT2G25140  
AT3G48870  
AT3G45450  
AT1G74310 Poptr1|596435  
AT1G18940,AT1G74780 Poptr1|575062  
Poptr1|593832  
AT2G28120 Poptr1|704829  
Poptr1|681362,Poptr1|707038  
Poptr1|592677  
AT4G34950,AT2G16660 Poptr1|557097,Poptr1|694226,Poptr1|596636  
Poptr1|357067  
AT1G80530 Poptr1|103444,Poptr1|592678,Poptr1|48869,Poptr1|592676,Poptr1|583643  
AT5G14120,AT3G01930  
AT5G50520,AT5G50630  
AT2G34355,AT2G34350 Poptr1|576664,Poptr1|641824,Poptr1|355806  
AT2G39210 Poptr1|353332  
Poptr1|597129  
Poptr1|591065,Poptr1|104341,Poptr1|597130

AT5G45275,AT4G19450 Poptr1|356767,Poptr1|343533  
Poptr1|575551  
AT2G30300 Poptr1|574510  
Poptr1|347723  
AT3G01630,AT1G31470  
Poptr1|356065  
AT1G80860 Poptr1|647173,Poptr1|674896  
AT5G22130 Poptr1|639801  
Poptr1|585875  
AT1G02780,AT4G02230,AT3G16780 Poptr1|59626  
Poptr1|661397,Poptr1|743493,Poptr1|544725  
Poptr1|575019  
AT4G16030 Poptr1|700865  
AT3G28700 Poptr1|641559  
Poptr1|579716  
AT4G02160,AT5G61710 Poptr1|572642,Poptr1|552500  
Poptr1|595875  
AT3G24590 Poptr1|673175,Poptr1|737602  
Poptr1|571515,Poptr1|568793  
AT1G06870,AT2G30440 Poptr1|740294  
AT3G19310,AT1G49740 Poptr1|722214,Poptr1|744317  
Poptr1|719272,Poptr1|558874  
AT1G13680 Poptr1|545969,Poptr1|583848  
AT5G67130 Poptr1|651090,Poptr1|719261  
Poptr1|556397,Poptr1|736425  
AT5G15490,AT3G01010,AT5G39320,AT3G29360  
AT1G26570 Poptr1|566943,Poptr1|564284  
Poptr1|580236  
Poptr1|589728  
AT5G49460,AT3G06650 Poptr1|723928,Poptr1|656642  
Poptr1|672087  
AT5G10160  
AT2G22230 Poptr1|640779,Poptr1|553441  
AT4G36080,AT2G17930 Poptr1|349870,Poptr1|356886  
AT4G28820 Poptr1|692027  
AT2G40810,AT3G56440 Poptr1|704215  
AT4G30510  
AT5G05150 Poptr1|581867,Poptr1|729565  
AT2G47720,AT3G62770 Poptr1|730668  
Poptr1|585013,Poptr1|584532  
AT5G58100 Poptr1|695456,Poptr1|584533  
Poptr1|669463  
AT5G57590  
AT5G57600 Poptr1|585169,Poptr1|578624  
Poptr1|585170  
AT4G14680,AT3G22890 Poptr1|658460,Poptr1|686235  
AT1G19920 Poptr1|342176,Poptr1|685430  
AT5G43780  
AT3G08780 Poptr1|577060  
AT4G32910 Poptr1|561746,Poptr1|689012  
AT3G63150 Poptr1|52090  
AT3G05310,AT5G27540 Poptr1|689862,Poptr1|687936  
Poptr1|642082  
AT2G36960 Poptr1|589465,Poptr1|701526  
AT4G39380 Poptr1|562746,Poptr1|558643  
Poptr1|644046,Poptr1|663753,Poptr1|713962  
AT4G33865,AT3G44010,AT3G43980  
Poptr1|571027  
Poptr1|572668  
Poptr1|677454  
Poptr1|587631,Poptr1|587641,Poptr1|550362  
AT4G02260 Poptr1|556532  
AT1G75560 Poptr1|694817  
AT5G49940 Poptr1|573735,Poptr1|596723  
AT4G25910  
AT1G07210 Poptr1|585168  
Poptr1|349350  
Poptr1|102805,Poptr1|107649,Poptr1|107301,Poptr1|343064,Poptr1|107349,Poptr1|105715,Poptr1|10738  
8,Poptr1|100196,Poptr1|105556,Poptr1|101715,Poptr1|61558,Poptr1|346476,Poptr1|106595,Poptr1|61567  
Poptr1|573747  
Poptr1|98048  
Poptr1|106179,Poptr1|672773,Poptr1|354926,Poptr1|343375  
Poptr1|100624,Poptr1|357180  
AT3G03610 Poptr1|571309  
AT2G44770,AT3G60260 Poptr1|551965,Poptr1|591762  
AT3G43400,AT1G67400 Poptr1|565036,Poptr1|697918  
Poptr1|569036  
AT1G03620 Poptr1|571760  
AT5G66840 Poptr1|76138,Poptr1|558848

Poptr1|349661  
AT5G44710  
Poptr1|554612  
Poptr1|645867,Poptr1|640632  
AT4G25970,AT5G57190  
AT1G65540 Poptr1|55436,Poptr1|353767  
AT3G59820 Poptr1|75292  
AT2G36900,AT5G50440 Poptr1|688007  
AT1G49510 Poptr1|581468  
Poptr1|72143  
AT5G24280 Poptr1|569562  
AT4G25720 Poptr1|592908,Poptr1|693830  
AT2G33250  
AT3G04310 Poptr1|573761  
AT5G22390 Poptr1|594964,Poptr1|556814  
AT1G48860,AT2G45300 Poptr1|700153,Poptr1|552035  
AT2G44640 Poptr1|591807  
AT3G06960 Poptr1|697784  
AT2G40113,AT5G47635,AT4G17215 Poptr1|716934  
AT1G51355 Poptr1|560534,Poptr1|576338,Poptr1|64477  
Poptr1|572821  
AT1G52140,AT3G16330  
AT4G29110Poptr1|702151,Poptr1|593226  
AT1G29150  
Poptr1|682824,Poptr1|563768,Poptr1|566988  
Poptr1|98469  
Poptr1|587913  
AT2G04305 Poptr1|722536,Poptr1|550082  
AT2G15970  
AT4G37220  
AT2G23680 Poptr1|563087  
Poptr1|697308,Poptr1|712891  
AT3G50830 Poptr1|719392  
AT3G54500  
Poptr1|555020,Poptr1|585137,Poptr1|590277,Poptr1|101483,Poptr1|350844,Poptr1|693173,Poptr1|62920,  
Poptr1|585313,Poptr1|647277  
AT1G55980,AT1G56000 Poptr1|586878  
AT3G47340 Poptr1|697451,Poptr1|691509  
AT5G10240,AT5G65010 Poptr1|715888  
AT4G36410  
AT5G42990,AT1G45050  
AT1G75440  
Poptr1|563219,Poptr1|683264  
Poptr1|710125,Poptr1|715294  
AT3G62600 Poptr1|692271,Poptr1|572634  
Poptr1|64152,Poptr1|558228  
AT3G57340,AT5G05750 Poptr1|565591  
AT5G22060,AT3G44110  
Poptr1|585513,Poptr1|591713  
Poptr1|687446,Poptr1|720096  
Poptr1|709907  
AT3G08970  
AT1G63110,AT1G12730 Poptr1|691154  
AT2G05120 Poptr1|710294  
Poptr1|573082  
AT1G70630 Poptr1|99754,Poptr1|345534  
AT4G24230 Poptr1|592048  
AT3G15354,AT1G53090 Poptr1|728392,Poptr1|703945  
AT5G23730,AT5G52250 Poptr1|57811,Poptr1|662347  
AT2G32950 Poptr1|55730,Poptr1|584738  
AT4G11110 Poptr1|350321,Poptr1|63453  
AT2G46340  
AT1G15420 Poptr1|691202,Poptr1|349491  
AT4G20060 Poptr1|578864  
AT2G40930 Poptr1|705561,Poptr1|104601,Poptr1|560337  
Poptr1|576472,Poptr1|717619  
AT5G22030 Poptr1|64148  
AT4G10570,AT4G10590,AT1G32850 Poptr1|49455,Poptr1|569279  
AT5G10310 Poptr1|558516,Poptr1|562574  
AT4G37810  
Poptr1|578944  
Poptr1|592800  
AT2G33830,AT1G28330  
Poptr1|647948  
AT5G44300  
AT1G75810 Poptr1|550865,Poptr1|73061  
AT5G07340,AT5G61790 Poptr1|699330,Poptr1|733818  
Poptr1|548134  
AT2G46570 Poptr1|57096  
AT5G01190  
AT5G09360 Poptr1|63911  
Poptr1|592533,Poptr1|576885,Poptr1|560853

Poptr1|569222  
Poptr1|591274,Poptr1|591290,Poptr1|705531  
AT2G40370,AT5G05390 Poptr1|656305,Poptr1|724385,Poptr1|696763,Poptr1|724380  
AT2G38080 Poptr1|653089,Poptr1|351881,Poptr1|735738,Poptr1|557962,Poptr1|64298  
Poptr1|695418  
Poptr1|55967,Poptr1|568910,Poptr1|579478,Poptr1|548008  
AT1G18140 Poptr1|574983,Poptr1|574985,Poptr1|569758  
AT5G58910  
AT5G07130 Poptr1|574533,Poptr1|571858  
AT2G30210  
Poptr1|683792,Poptr1|721359  
Poptr1|592484  
AT5G01040,AT5G01050,AT3G09220  
AT2G29130 Poptr1|548861,Poptr1|721410,Poptr1|54735,Poptr1|592485  
Poptr1|65827  
Poptr1|698530,Poptr1|720063  
Poptr1|677566  
Poptr1|685735  
Poptr1|679431  
Poptr1|105565  
AT5G60020 Poptr1|64839  
AT4G39830 Poptr1|654817,Poptr1|71677,Poptr1|567075  
AT5G03260 Poptr1|53388,Poptr1|546082  
Poptr1|64356,Poptr1|579475,Poptr1|587360,Poptr1|568912,Poptr1|591289  
Poptr1|574330,Poptr1|738904,Poptr1|738893  
Poptr1|586004,Poptr1|63912,Poptr1|641167  
AT5G48100 Poptr1|559459  
AT5G21105,AT5G21100  
AT3G26750 Poptr1|597543,Poptr1|76349  
AT5G37055 Poptr1|571857  
AT1G66840,AT5G38150 Poptr1|553064  
AT2G38740 Poptr1|702900,Poptr1|743203  
Poptr1|551934,Poptr1|591814  
Poptr1|580127,Poptr1|589959  
AT1G70870 Poptr1|696522  
AT1G24020 Poptr1|566333  
AT1G70830,AT1G70850,AT1G70840,AT1G70890,AT1G70880,AT5G28000,AT5G28010,AT1G35310,AT1G35260,AT1  
G23130 Poptr1|58305,Poptr1|701751,Poptr1|658759  
Poptr1|588001,Poptr1|719864,Poptr1|719862  
AT1G24610 Poptr1|345326  
Poptr1|354294  
AT4G36610,AT2G18360 Poptr1|53381,Poptr1|689718  
Poptr1|556474,Poptr1|546075,Poptr1|557247  
AT4G19830 Poptr1|586750  
Poptr1|575581  
Poptr1|571982,Poptr1|76492,Poptr1|649698,Poptr1|642110  
AT4G34160 Poptr1|549935,Poptr1|686739  
Poptr1|347448,Poptr1|51905  
AT1G70210 Poptr1|698118,Poptr1|564776  
Poptr1|347592,Poptr1|572042  
AT5G02110Poptr1|560791  
Poptr1|347626,Poptr1|703148  
AT4G37630 Poptr1|553971  
Poptr1|558898,Poptr1|696006  
AT5G10440,AT5G65420,AT2G22490  
AT4G03270 Poptr1|568319,Poptr1|544980,Poptr1|568322,Poptr1|571816,Poptr1|574576  
AT3G50070,AT5G67260  
AT3G06100 Poptr1|354947  
AT1G80760 Poptr1|63037,Poptr1|343829  
Poptr1|347386  
AT5G37810,AT5G37820 Poptr1|566501,Poptr1|552968  
AT4G18910,AT4G19030 Poptr1|728117,Poptr1|647823,Poptr1|579272  
AT4G10380 Poptr1|687640,Poptr1|691926  
AT2G29870,AT2G34390,AT1G31885  
AT4G04870 Poptr1|544836  
Poptr1|553824,Poptr1|745887  
Poptr1|577903  
AT1G53850,AT3G14290  
Poptr1|106667  
AT5G19720,AT1G25350 Poptr1|354186  
AT5G49030 Poptr1|582838,Poptr1|587303  
Poptr1|597450,Poptr1|587305,Poptr1|105971  
AT2G36810 Poptr1|739607  
AT5G62030 Poptr1|571414,Poptr1|665523  
AT1G64340,AT5G41810 Poptr1|63442  
Poptr1|669949,Poptr1|546528,Poptr1|552858,Poptr1|597314  
AT3G54230 Poptr1|586742  
AT2G33385 Poptr1|345464,Poptr1|725907  
AT1G30825 Poptr1|708923,Poptr1|711859  
AT5G07120,AT5G58440 Poptr1|739073  
AT5G37050  
Poptr1|677805



AT4G23000,AT4G11800  
 AT2G19880 Poptr1|578540,Poptr1|704083  
 AT2G32480,AT1G05140 Poptr1|343032,Poptr1|572966  
 AT3G55390 Poptr1|696875,Poptr1|724737  
 AT4G16060 Poptr1|697802  
 AT1G76770 Poptr1|559382,Poptr1|551314  
 Poptr1|64986  
 AT3G62870,AT2G47610  
 Poptr1|683443,Poptr1|673545,Poptr1|678912,Poptr1|677297,Poptr1|748480,Poptr1|704761  
 AT4G26555 Poptr1|642655  
 AT2G24090 Poptr1|737939  
 Poptr1|581817  
 AT1G03475,AT4G03205  
 AT3G45100 Poptr1|58235  
 Poptr1|560968  
 AT5G01590 Poptr1|577043  
 AT5G08740 Poptr1|562537  
 AT4G29460,AT4G29470,AT2G19690 Poptr1|717006  
 AT1G66330 Poptr1|692139  
 AT5G53920  
 Poptr1|580932,Poptr1|693948  
 AT1G03770  
 Poptr1|576320,Poptr1|583600  
 AT3G57690,AT2G41905  
 AT3G20865 Poptr1|557757  
 AT1G19880  
 Poptr1|694827,Poptr1|692960,Poptr1|346724  
 AT3G09180 Poptr1|576511  
 Poptr1|651633  
 Poptr1|654756,Poptr1|585207  
 AT1G71750  
 AT5G35690 Poptr1|688337  
 Poptr1|701812  
 AT3G28710,AT3G28715  
 AT2G38210  
 AT2G38230  
 AT5G01410 Poptr1|576973,Poptr1|560912  
 AT3G16050 Poptr1|548840  
 AT5G26850 Poptr1|729421  
 AT1G05960 Poptr1|594507,Poptr1|718347  
 AT5G21080  
 AT2G41830 Poptr1|351531,Poptr1|57985  
 AT1G26880,AT1G69620,AT3G28900  
 Poptr1|679325,Poptr1|733792,Poptr1|570360,Poptr1|701826,Poptr1|743295  
 Poptr1|679326,Poptr1|576920  
 AT4G37925 Poptr1|694588,Poptr1|643562  
 AT3G05670 Poptr1|97803  
 Poptr1|574119  
 AT3G51580 Poptr1|577181,Poptr1|560989  
 AT4G11050  
 Poptr1|696739,Poptr1|55432  
 AT4G38990,AT4G39000  
 AT4G02290,AT1G02800 Poptr1|684274,Poptr1|688256  
 AT1G64390 Poptr1|63431,Poptr1|554485  
 Poptr1|49354  
 AT4G24260  
 Poptr1|559342  
 Poptr1|733972,Poptr1|575667  
 AT2G32990 Poptr1|573005  
 AT4G39010 Poptr1|546691  
 AT1G48930 Poptr1|562825  
 Poptr1|578012  
 AT5G49720 Poptr1|675657,Poptr1|683621  
 AT3G42155 Poptr1|347152  
 AT1G65610  
 AT2G44540,AT2G44550,AT2G44560,AT2G44570  
 Poptr1|343728,Poptr1|48649  
 AT3G43860 Poptr1|344586  
 Poptr1|670290,Poptr1|348590  
 AT1G71380,AT1G22880 Poptr1|60435  
 Poptr1|552745,Poptr1|586718,Poptr1|584680  
 Poptr1|356897  
 AT4G23560,AT4G09740 Poptr1|48715  
 AT1G75680,AT1G19940 Poptr1|559819,Poptr1|692964  
 AT1G23210,AT1G70710 Poptr1|104427,Poptr1|55208,Poptr1|720068  
 AT3G09310 Poptr1|667880  
 AT5G55500 Poptr1|550155  
 AT2G38580 Poptr1|352008  
 AT5G14690,AT3G01516 Poptr1|64755  
 AT3G56290  
 Poptr1|665617  
 AT3G15420

Poptr1|579492,Poptr1|568928  
AT2G31130Poptr1|550302,Poptr1|574343,Poptr1|592186  
AT5G16510 Poptr1|574037,Poptr1|675590  
AT3G02230,AT5G15650  
AT3G08900 Poptr1|564316,Poptr1|698361  
AT5G50750  
Poptr1|565377,Poptr1|678781,Poptr1|581398  
Poptr1|556393,Poptr1|673066  
Poptr1|575386,Poptr1|570293  
Poptr1|62846  
AT1G63210,AT1G65440 Poptr1|560322,Poptr1|734687  
AT1G78650 Poptr1|585498  
AT1G61850 Poptr1|694066,Poptr1|102312  
AT2G41370,AT3G57130 Poptr1|576209,Poptr1|351445  
AT4G17483,AT4G17480,AT4G17470,AT5G47340,AT5G47330,AT5G47350  
Poptr1|693627,Poptr1|702866  
AT3G60340 Poptr1|591790,Poptr1|692484  
AT5G12950,AT5G12960 Poptr1|350793,Poptr1|708569  
AT4G24500 Poptr1|72185,Poptr1|692586  
AT1G23070 Poptr1|577825  
AT4G38360 Poptr1|54256,Poptr1|594993  
AT1G77220 Poptr1|559339,Poptr1|551350  
AT5G06590 Poptr1|667548  
AT4G14990,AT3G22270  
Poptr1|106579,Poptr1|576006,Poptr1|560243,Poptr1|597352,Poptr1|585016,Poptr1|103986  
AT1G79090 Poptr1|550538,Poptr1|699177  
AT2G28150 Poptr1|558317,Poptr1|673391  
AT3G46110,AT5G59790 Poptr1|49032,Poptr1|558108  
AT1G05577  
AT5G10150  
Poptr1|567476,Poptr1|563854  
AT2G38830 Poptr1|346916  
AT5G13860,AT3G12400 Poptr1|350926,Poptr1|708425  
AT5G35980 Poptr1|730204  
Poptr1|663256,Poptr1|702470  
AT5G40950 Poptr1|707031  
AT2G23740 Poptr1|716195  
Poptr1|716193  
AT1G64405 Poptr1|554489,Poptr1|579064,Poptr1|63424  
AT4G03560 Poptr1|744967  
AT1G66510 Poptr1|553019  
Poptr1|562521  
AT1G14660,AT2G01980 Poptr1|698143,Poptr1|354350  
AT3G57910 Poptr1|667389  
Poptr1|575864  
AT3G02680 Poptr1|734231  
AT5G12300 Poptr1|64633,Poptr1|557688  
AT5G55530 Poptr1|568532,Poptr1|49378  
AT1G50570  
AT1G50530  
AT1G12840 Poptr1|65026,Poptr1|60131  
AT2G27180 Poptr1|556920,Poptr1|594856  
AT5G06380,AT3G11690 Poptr1|653413,Poptr1|576460  
AT3G18800 Poptr1|46375,Poptr1|746510  
Poptr1|568538  
AT5G20290,AT5G59240  
Poptr1|691808,Poptr1|722874,Poptr1|641311,Poptr1|743662  
AT5G20130 Poptr1|560153  
AT2G36060  
AT3G52560 Poptr1|653682,Poptr1|576536  
AT1G70660,AT1G23260 Poptr1|720717,Poptr1|658724  
AT5G09390 Poptr1|712236,Poptr1|548796  
AT3G25120 Poptr1|684151  
AT3G53570 Poptr1|352524,Poptr1|576599  
AT4G32660  
Poptr1|565990,Poptr1|726191  
Poptr1|352831  
AT4G24740 Poptr1|105531,Poptr1|662069,Poptr1|700966,Poptr1|662070  
AT1G13870 Poptr1|345150  
AT4G19000 Poptr1|676610  
AT1G32130 Poptr1|689497,Poptr1|349939  
AT5G17290 Poptr1|592819  
AT5G38460 Poptr1|580970,Poptr1|555846,Poptr1|60388  
Poptr1|731385,Poptr1|692349  
AT1G01230  
AT5G42000 Poptr1|691054,Poptr1|646803  
AT5G02670  
AT1G17980 Poptr1|574950  
AT2G25850,AT4G32850 Poptr1|587280,Poptr1|596695,Poptr1|344653,Poptr1|58464  
AT3G06560 Poptr1|564363  
AT5G51510 Poptr1|662465  
AT4G38225 Poptr1|579750,Poptr1|595020

AT5G11880,AT3G14390 Poptr1|557223,Poptr1|556492  
Poptr1|587609  
Poptr1|572691,Poptr1|709823  
Poptr1|591793  
AT3G62840,AT2G47640  
Poptr1|747580,Poptr1|591357,Poptr1|595929,Poptr1|558086  
AT1G05205 Poptr1|578604  
AT1G61810,AT1G61820  
Poptr1|595371  
Poptr1|574974  
AT2G44480 Poptr1|103483,Poptr1|108291,Poptr1|583263,Poptr1|583264,Poptr1|583253  
Poptr1|583266,Poptr1|98502  
Poptr1|545716  
Poptr1|583902  
Poptr1|583406,Poptr1|357161,Poptr1|357165,Poptr1|556207,Poptr1|589814,Poptr1|545729,Poptr1|70519  
6,Poptr1|583703,Poptr1|343005,Poptr1|594023,Poptr1|745467,Poptr1|548683,Poptr1|709648,Poptr1|548706,Poptr1|5  
95368  
AT3G18070,AT3G18080 Poptr1|728895,Poptr1|574973  
Poptr1|63798  
AT4G21760 Poptr1|705586,Poptr1|555358,Poptr1|544846,Poptr1|544848  
AT4G27820,AT4G27830,AT3G62740,AT3G62750,AT5G16580,AT4G22100,AT1G45191,AT1G60090,AT1G02850  
Poptr1|553447  
AT5G54570 Poptr1|571449  
Poptr1|583265  
AT5G26000,AT5G25980,AT5G48375,AT1G51470,AT1G47600,AT1G51490  
AT2G44470,AT2G44460,AT3G60140,AT5G24550,AT5G24540,AT2G44490,AT3G60120,AT3G21370,AT1G52400,AT1  
G75940,AT1G66270,AT1G66280,AT3G09260,AT5G28510,AT3G03640,AT2G32860  
AT5G44640,AT5G42260,AT2G25630,AT2G44450,AT3G60130  
AT5G48175 Poptr1|678730  
Poptr1|595668,Poptr1|103821  
Poptr1|63010,Poptr1|555827  
Poptr1|581323  
AT5G36890 Poptr1|687291  
Poptr1|579504  
AT1G26560 Poptr1|345146,Poptr1|55373  
AT5G56280,AT4G26430 Poptr1|744837  
Poptr1|550680  
AT1G02500,AT4G01850 Poptr1|552593,Poptr1|572548  
AT2G36880 Poptr1|689393  
Poptr1|566909,Poptr1|564333  
Poptr1|581614  
AT3G17390 Poptr1|570670  
Poptr1|548638  
AT4G32390,AT2G25520 Poptr1|58553,Poptr1|654132  
AT3G14410 Poptr1|98380  
AT3G17430,AT1G48230 Poptr1|725533,Poptr1|742287  
AT1G53660  
AT5G25400,AT5G11230  
Poptr1|567497  
AT1G07730,AT2G28670 Poptr1|656022  
AT3G55230,AT2G39430 Poptr1|563835  
AT2G16060 Poptr1|557304  
AT3G10520  
Poptr1|557303  
AT2G36530  
Poptr1|689415  
Poptr1|575698  
AT2G29560 Poptr1|583995,Poptr1|686866  
Poptr1|641113,Poptr1|716772  
Poptr1|596449,Poptr1|590699  
Poptr1|356354  
AT1G74030 Poptr1|687753  
AT5G53880 Poptr1|703940,Poptr1|660918  
Poptr1|647991,Poptr1|704174  
AT5G01520 Poptr1|351904,Poptr1|576963  
AT5G58787,AT3G47160 Poptr1|48973,Poptr1|723061  
AT1G24440 Poptr1|726155,Poptr1|720190  
Poptr1|345990  
AT1G13195  
AT3G62790,AT2G47690 Poptr1|644752,Poptr1|688265  
AT5G49945,AT4G24330 Poptr1|742492  
AT5G49930 Poptr1|353988  
Poptr1|566877  
Poptr1|566876,Poptr1|353987  
AT5G28770 Poptr1|729825  
AT3G54620,AT4G02640 Poptr1|559630,Poptr1|551106,Poptr1|98999  
AT5G24800 Poptr1|583184  
AT5G49880 Poptr1|742580,Poptr1|704692  
Poptr1|671152,Poptr1|561892  
AT1G15370 Poptr1|705867  
AT5G43750  
Poptr1|698036

AT5G52420 Poptr1|356217,Poptr1|688626  
AT5G23920  
AT1G27990 Poptr1|548050,Poptr1|712441  
Poptr1|690974  
Poptr1|681875  
AT1G78450,AT1G17100  
Poptr1|700947,Poptr1|699406  
AT1G78460  
AT3G26380 Poptr1|696321,Poptr1|697967,Poptr1|578859  
AT1G80200 Poptr1|349483  
AT5G11280Poptr1|585370,Poptr1|561870  
AT4G02460 Poptr1|572706  
Poptr1|564692  
AT1G67960 Poptr1|566414  
Poptr1|564691  
Poptr1|557646  
AT4G13640,AT3G24120 Poptr1|641929,Poptr1|668388  
AT3G12730  
Poptr1|554102,Poptr1|356719  
AT2G06020 Poptr1|568185  
Poptr1|559512,Poptr1|347022  
Poptr1|582337  
AT5G42630 Poptr1|591871,Poptr1|551895  
AT1G14600 Poptr1|588574  
Poptr1|583275  
AT2G38300  
AT2G20400 Poptr1|576977,Poptr1|653130  
AT5G06800 Poptr1|576276,Poptr1|595853,Poptr1|579580,Poptr1|105854  
Poptr1|657051,Poptr1|658655  
AT2G01060 Poptr1|683393,Poptr1|560052  
AT4G17695  
Poptr1|568705,Poptr1|555668  
Poptr1|98519  
Poptr1|64680  
Poptr1|564064  
Poptr1|701355,Poptr1|653502  
Poptr1|571111,Poptr1|702383  
AT5G45580  
Poptr1|661354,Poptr1|704107  
Poptr1|584524  
AT5G29000,AT3G04450  
AT4G04580  
AT1G69580  
AT4G28610 Poptr1|711538  
AT3G04030,AT5G18240 Poptr1|571228  
Poptr1|657052  
Poptr1|564213,Poptr1|567034  
AT1G79430 Poptr1|345095,Poptr1|724244  
AT2G40260  
AT5G16560 Poptr1|546525  
Poptr1|568045  
AT2G42660  
AT1G32240 Poptr1|590054,Poptr1|349927  
AT3G13040 Poptr1|563369,Poptr1|582202  
Poptr1|668090  
Poptr1|576240,Poptr1|560471  
AT5G12430 Poptr1|722963,Poptr1|64226  
AT2G41520  
AT5G21920 Poptr1|717001  
Poptr1|714306  
AT5G24810  
Poptr1|583172,Poptr1|100056,Poptr1|577777,Poptr1|586333,Poptr1|590215,Poptr1|594267,Poptr1|59211  
6,Poptr1|100052,Poptr1|100054  
AT1G05785 Poptr1|664706  
AT5G01430,AT3G49420 Poptr1|689740,Poptr1|695784  
AT3G03180  
AT3G63220 Poptr1|559574,Poptr1|342295  
Poptr1|559112  
Poptr1|709848  
AT5G64200 Poptr1|645719  
AT3G57890,AT2G42230 Poptr1|98719  
AT2G45520 Poptr1|682886  
AT1G68630 Poptr1|566651  
Poptr1|575281,Poptr1|345984,Poptr1|562984  
AT1G58320  
Poptr1|564647,Poptr1|658735  
AT2G40935 Poptr1|652484  
AT1G68610  
AT1G52200  
AT1G49030,AT3G18470,AT3G18450,AT3G18460 Poptr1|569870  
Poptr1|564646,Poptr1|705496,Poptr1|104425,Poptr1|698171,Poptr1|587401  
AT1G14880,AT1G14870,AT5G35525

Poptr1|566998  
AT1G14030 Poptr1|659271,Poptr1|564247  
AT2G34730 Poptr1|672186,Poptr1|550620  
AT5G15000,AT5G14990  
AT1G51580 Poptr1|698745  
AT5G09560,AT5G64390 Poptr1|577297,Poptr1|562363  
AT2G03110Poptr1|596560  
Poptr1|551726  
AT1G14170  
AT2G22600 Poptr1|655460,Poptr1|563284  
AT5G53060 Poptr1|345739,Poptr1|574729  
Poptr1|698404,Poptr1|564223  
Poptr1|591799  
Poptr1|97097,Poptr1|545337  
AT5G46190 Poptr1|568423  
AT5G15270 Poptr1|556333,Poptr1|556334,Poptr1|58395  
Poptr1|568424  
AT2G45380 Poptr1|347854,Poptr1|572103  
AT4G22740 Poptr1|704235,Poptr1|350108  
Poptr1|560062  
AT5G64670 Poptr1|46364,Poptr1|582327  
AT4G17070 Poptr1|589929,Poptr1|580156,Poptr1|347775  
Poptr1|659039  
AT1G69070 Poptr1|659038  
AT5G61280 Poptr1|574862  
AT1G13920,AT1G69325 Poptr1|696687,Poptr1|566956  
AT5G16240,AT3G02630 Poptr1|567169,Poptr1|57423,Poptr1|345079  
AT1G43800 Poptr1|52013  
AT3G02620,AT3G02610,AT5G16230  
AT2G43710 Poptr1|704553  
AT5G53020 Poptr1|569567,Poptr1|574736  
AT5G66180 Poptr1|343459  
AT4G29590  
AT3G01660 Poptr1|549596  
Poptr1|352080  
AT4G30580 Poptr1|352346  
Poptr1|597722  
AT1G26670 Poptr1|564252,Poptr1|698390  
AT3G29100,AT5G39510  
Poptr1|556374,Poptr1|688954  
AT5G39630  
AT5G04430 Poptr1|698695,Poptr1|563662  
AT2G33990 Poptr1|693967,Poptr1|568750  
AT3G51380  
AT2G26410  
AT2G26180 Poptr1|577837,Poptr1|561640  
AT3G22190 Poptr1|48931,Poptr1|558227  
AT3G49260 Poptr1|574741,Poptr1|699575  
Poptr1|642463  
AT3G15050 Poptr1|660696,Poptr1|707781  
Poptr1|571017  
AT5G13460 Poptr1|100701  
Poptr1|356820  
AT3G49380 Poptr1|581359  
AT3G59690  
Poptr1|576656,Poptr1|702713,Poptr1|698642  
AT3G16490 Poptr1|548923  
AT1G76705,AT5G03960 Poptr1|576228,Poptr1|717571  
AT4G14750 Poptr1|566198,Poptr1|564871  
AT5G35670 Poptr1|700602  
AT1G51960  
AT5G62070,AT5G07240 Poptr1|570467  
AT1G17480,AT1G72670 Poptr1|597674,Poptr1|343266  
AT3G52290  
AT3G09710,AT5G03040  
AT4G29150  
Poptr1|587017,Poptr1|580477,Poptr1|578586  
AT5G38420,AT5G38430,AT5G38410,AT1G67090 Poptr1|714023,Poptr1|670906  
AT1G22470,AT1G72240,AT1G35210 Poptr1|559063,Poptr1|586410,Poptr1|347421  
Poptr1|59372,Poptr1|347816  
AT5G51380,AT5G51370  
AT5G07670 Poptr1|739942,Poptr1|554170  
AT3G10650 Poptr1|563528  
Poptr1|583570  
AT1G71220 Poptr1|645664  
Poptr1|593361,Poptr1|553426  
Poptr1|645663  
Poptr1|553425,Poptr1|645665  
AT3G57400,AT5G52500 Poptr1|667472,Poptr1|351514  
AT1G11650Poptr1|713522  
AT5G54900,AT4G27000 Poptr1|727110,Poptr1|663393,Poptr1|575377  
AT1G47490,AT1G47500 Poptr1|347675,Poptr1|677802

AT3G19130,AT1G49600 Poptr1|697315,Poptr1|744254  
AT5G19350 Poptr1|64489,Poptr1|650044  
Poptr1|589607,Poptr1|577228  
AT5G55030  
AT5G55040 Poptr1|595007  
AT1G76380,AT1G20670 Poptr1|559957,Poptr1|693031  
AT4G17020 Poptr1|713992  
AT5G59305 Poptr1|64410,Poptr1|558094  
AT3G49050 Poptr1|346071  
AT5G37710 Poptr1|545469,Poptr1|348781  
AT4G00500 Poptr1|57027,Poptr1|684336  
Poptr1|545468,Poptr1|592107,Poptr1|582616  
AT4G01040 Poptr1|572376  
Poptr1|348064  
AT5G67030 Poptr1|696029,Poptr1|72002  
AT4G19200,AT5G45350  
AT5G17650 Poptr1|571331  
AT2G04063,AT1G31750  
Poptr1|571974,Poptr1|696199  
AT4G15130  
Poptr1|349716,Poptr1|589847  
AT2G32260 Poptr1|685877,Poptr1|688652  
AT2G33835 Poptr1|555770,Poptr1|97202  
AT3G18640 Poptr1|75595,Poptr1|650584  
AT3G26850  
Poptr1|579603  
AT3G10370 Poptr1|687399  
AT2G46910 Poptr1|552393  
AT4G04955 Poptr1|693923  
Poptr1|587504  
AT5G37370 Poptr1|714289,Poptr1|689668  
AT5G58375  
Poptr1|571890,Poptr1|574499  
AT5G18150 Poptr1|571208  
AT3G24350 Poptr1|745758,Poptr1|578414,Poptr1|678656  
AT5G05760 Poptr1|567294  
Poptr1|649016  
AT3G43700,AT5G21010  
AT3G03740 Poptr1|665508  
Poptr1|657921,Poptr1|657650  
Poptr1|640870,Poptr1|741701  
AT5G19000,AT3G06190  
Poptr1|597292  
AT2G39760 Poptr1|705373,Poptr1|698559,Poptr1|353592  
AT2G47270 Poptr1|552553,Poptr1|572593  
AT2G44060 Poptr1|695710  
Poptr1|673769  
AT1G61100Poptr1|545041,Poptr1|568260  
AT4G27430 Poptr1|568940,Poptr1|703970  
Poptr1|581058  
Poptr1|679642  
AT3G07560 Poptr1|664949  
AT3G05630 Poptr1|570751  
AT3G16785 Poptr1|697803,Poptr1|703720  
Poptr1|663761,Poptr1|572056,Poptr1|644054  
AT2G23090 Poptr1|592054  
AT4G00020,AT5G01630  
Poptr1|573323  
AT4G00010 Poptr1|577057  
AT1G67550 Poptr1|345492  
Poptr1|676935  
AT3G13170 Poptr1|550198  
AT5G02820 Poptr1|675953  
AT1G63990 Poptr1|640438  
AT2G37100  
AT5G03110Poptr1|667765,Poptr1|589407  
AT3G52115Poptr1|722745,Poptr1|64579  
AT1G05780,AT2G31710 Poptr1|589839  
AT2G31305 Poptr1|558452,Poptr1|562507  
AT2G39340 Poptr1|720638  
AT2G41740,AT3G57410 Poptr1|351515,Poptr1|701385  
AT5G57320,AT4G30160 Poptr1|702162,Poptr1|580518,Poptr1|106875  
AT2G29890 Poptr1|557937  
AT4G06599  
Poptr1|574030,Poptr1|680180,Poptr1|553380,Poptr1|553382,Poptr1|553381,Poptr1|553379,Poptr1|64561  
9,Poptr1|584478  
AT3G29385  
AT5G07980,AT5G07940,AT5G07970 Poptr1|661849,Poptr1|596442,Poptr1|661800,Poptr1|680857  
Poptr1|560606,Poptr1|702313  
AT1G04830  
AT4G13730 Poptr1|641918,Poptr1|742744

AT3G07090 Poptr1|710319  
Poptr1|589857,Poptr1|553868  
Poptr1|583685  
AT2G35720 Poptr1|594114  
AT2G35690,AT4G16760 Poptr1|646132,Poptr1|702862  
AT3G54130 Poptr1|560868,Poptr1|701582  
AT5G54750 Poptr1|571491  
AT5G06620 Poptr1|352204  
AT4G00416  
AT3G63030,AT4G22745 Poptr1|585556,Poptr1|99727,Poptr1|700480  
AT4G32630 Poptr1|561814  
AT4G13350 Poptr1|737569  
AT5G16060  
Poptr1|580783,Poptr1|585010  
Poptr1|557998  
AT3G54020,AT2G37940 Poptr1|560850,Poptr1|735665  
AT2G29525  
Poptr1|549117  
AT5G66090  
Poptr1|593803  
AT4G28450 Poptr1|689755,Poptr1|562167  
AT2G45270 Poptr1|572089  
AT2G35470 Poptr1|590047,Poptr1|693573  
AT3G07440 Poptr1|711532  
AT3G54470 Poptr1|708506,Poptr1|647290  
Poptr1|707264  
AT5G64270 Poptr1|577374  
Poptr1|589747  
AT5G65620,AT5G10540 Poptr1|674339,Poptr1|697109,Poptr1|686135  
AT4G19460 Poptr1|356766,Poptr1|554146  
AT5G59070  
AT1G73160 Poptr1|65586,Poptr1|55864  
AT5G41100,AT3G26910 Poptr1|65003  
AT2G33490 Poptr1|63180,Poptr1|554727  
Poptr1|689701  
AT4G36090,AT2G17970  
Poptr1|655456  
AT1G48980 Poptr1|741183  
AT5G40820 Poptr1|694256  
AT5G55130 Poptr1|550099  
AT3G50910,AT5G66480 Poptr1|346400,Poptr1|719554  
Poptr1|653323  
AT4G29380 Poptr1|653324  
AT4G39650,AT4G39640,AT1G69820 Poptr1|64926,Poptr1|558602  
Poptr1|108655  
AT4G29210 Poptr1|561067,Poptr1|704594  
Poptr1|588797,Poptr1|596402,Poptr1|109191  
AT5G22630,AT3G44720 Poptr1|594833,Poptr1|721464  
AT3G07630 Poptr1|565256  
AT1G11790Poptr1|694084,Poptr1|568031  
AT1G08250,AT2G27820  
Poptr1|738018  
Poptr1|561322,Poptr1|585585  
AT5G07780,AT5G07760,AT5G07650,AT5G07770  
AT5G58160 Poptr1|653567,Poptr1|669598  
AT1G42980  
AT1G31810 Poptr1|646373  
Poptr1|669156,Poptr1|353016,Poptr1|671336  
AT3G32400  
AT3G32410,AT2G25050 Poptr1|561323  
Poptr1|744173  
Poptr1|554130  
Poptr1|578865  
AT4G35760 Poptr1|593776  
AT4G23060 Poptr1|646571,Poptr1|63586  
Poptr1|575803  
AT1G21930,AT3G42150 Poptr1|643649  
Poptr1|559209  
AT5G08270,AT5G23200 Poptr1|558687,Poptr1|71798  
Poptr1|700546,Poptr1|552832  
AT2G43060  
Poptr1|643941  
AT5G49670 Poptr1|558980  
Poptr1|551707,Poptr1|558982  
AT1G58250 Poptr1|643939  
AT5G49680  
Poptr1|585449,Poptr1|72170  
Poptr1|643940  
Poptr1|594513,Poptr1|562240  
AT3G59400  
Poptr1|104051

AT5G58520,AT5G07140 Poptr1|649807,Poptr1|641516  
AT2G38500  
AT1G79760 Poptr1|64070,Poptr1|568253  
AT2G42840 Poptr1|643400,Poptr1|694658  
AT5G04620 Poptr1|590158  
AT1G36020,AT1G35530  
Poptr1|102966,Poptr1|592269  
AT5G63905 Poptr1|342571,Poptr1|572034  
AT1G56440 Poptr1|60628  
Poptr1|353867,Poptr1|353869,Poptr1|564231  
AT2G03150 Poptr1|567018  
AT5G14200,AT1G31180,AT1G80560 Poptr1|705751  
Poptr1|585285  
AT1G16040 Poptr1|554905  
AT5G64010 Poptr1|694284,Poptr1|562483  
AT1G01180Poptr1|552330  
AT4G39630 Poptr1|562665,Poptr1|71705  
AT4G33510  
AT1G22410  
Poptr1|51918,Poptr1|710522  
Poptr1|589927  
AT4G39980 Poptr1|654750,Poptr1|694307,Poptr1|597347,Poptr1|654749  
Poptr1|106048,Poptr1|649263,Poptr1|546187  
AT4G38750 Poptr1|105672,Poptr1|721795  
Poptr1|349011  
AT3G10810,AT3G56590 Poptr1|560321  
AT1G10790  
Poptr1|548752  
AT2G35640,AT1G31310 Poptr1|674636  
AT1G80000,AT1G15280 Poptr1|548666,Poptr1|553698  
AT4G30900 Poptr1|669584,Poptr1|695216,Poptr1|669585  
AT5G07630  
Poptr1|554166,Poptr1|590163  
Poptr1|552236,Poptr1|572340  
AT2G46250  
AT1G64180,AT5G41620 Poptr1|693400,Poptr1|640407  
AT5G11770Poptr1|561685  
AT4G24880 Poptr1|688539  
AT2G18990,AT3G25580 Poptr1|549967  
AT3G02650  
Poptr1|553487,Poptr1|548803,Poptr1|64880,Poptr1|64881,Poptr1|553014,Poptr1|553017,Poptr1|557541  
Poptr1|597110  
Poptr1|554960  
AT2G29970 Poptr1|64251,Poptr1|557918  
AT2G40130  
Poptr1|656256,Poptr1|659508  
AT1G07200 Poptr1|656255  
Poptr1|580114  
AT2G27260 Poptr1|576515  
AT3G52460 Poptr1|576516,Poptr1|352134  
AT2G24860  
Poptr1|562018,Poptr1|702075  
AT1G77855,AT1G22030 Poptr1|694534,Poptr1|342454  
Poptr1|553421,Poptr1|63859  
AT1G55475  
AT3G13480 Poptr1|103196,Poptr1|62681,Poptr1|555185  
AT4G39280 Poptr1|546063,Poptr1|686705  
Poptr1|671996  
AT5G09920 Poptr1|695933,Poptr1|71733  
AT5G23060 Poptr1|596510  
Poptr1|642214  
Poptr1|550115,Poptr1|642215  
AT1G30450 Poptr1|642216  
Poptr1|55841  
AT3G24710 Poptr1|590623  
AT4G24520 Poptr1|342526,Poptr1|694479  
AT4G30210 Poptr1|702173,Poptr1|580484  
AT3G02280  
Poptr1|568219,Poptr1|714013  
AT3G08760 Poptr1|560986,Poptr1|577175  
Poptr1|588640  
Poptr1|571693  
Poptr1|589041  
AT3G20480 Poptr1|571497  
AT3G48830,AT5G23690 Poptr1|575438,Poptr1|346036  
Poptr1|71881  
AT2G17580  
AT1G28090 Poptr1|350556  
AT3G04580 Poptr1|705056  
AT2G40940 Poptr1|692284  
AT1G66340 Poptr1|683754,Poptr1|740885  
Poptr1|594057



Poptr1|584063  
Poptr1|582139  
AT1G04310  
AT3G23150 Poptr1|696369,Poptr1|566121  
Poptr1|589003,Poptr1|678858  
AT5G53620 Poptr1|700763,Poptr1|569629,Poptr1|576504  
AT1G10410,AT1G59650 Poptr1|657533,Poptr1|726335  
AT3G29180,AT5G39430 Poptr1|577689  
Poptr1|55385  
Poptr1|58350  
AT1G13970  
AT4G02482 Poptr1|569786  
Poptr1|721779  
AT1G02280 Poptr1|644696,Poptr1|688213  
AT2G16640,AT3G16620 Poptr1|721785,Poptr1|713241  
Poptr1|579824  
AT5G05000  
AT5G20300 Poptr1|578875,Poptr1|583669  
Poptr1|579872  
Poptr1|592201,Poptr1|64650  
AT4G15810  
Poptr1|639943  
AT4G02510 Poptr1|588507,Poptr1|587306,Poptr1|565604,Poptr1|565600,Poptr1|100462  
Poptr1|65423  
AT3G20280,AT1G50620  
Poptr1|675719  
AT3G24200 Poptr1|690916  
AT2G06050 Poptr1|47967,Poptr1|672416,Poptr1|689817  
AT1G09400  
AT1G76680,AT1G76690 Poptr1|106155,Poptr1|592336,Poptr1|703231,Poptr1|59553  
AT1G17990,AT1G18020  
Poptr1|592335  
Poptr1|678949,Poptr1|704701,Poptr1|565340,Poptr1|98650  
AT1G73100  
AT2G24740,AT1G17770,AT2G05900  
Poptr1|694409  
AT5G04940 Poptr1|590678,Poptr1|690843,Poptr1|350945  
AT4G13460 Poptr1|725965,Poptr1|657329  
AT5G13960 Poptr1|553117  
Poptr1|719406,Poptr1|574323  
AT3G03750 Poptr1|571260  
Poptr1|350544  
AT2G33290  
Poptr1|348916  
AT5G47150,AT5G47160 Poptr1|565010,Poptr1|63206,Poptr1|588167,Poptr1|575518  
AT2G22740,AT2G35160  
Poptr1|351328,Poptr1|667218  
AT3G47640 Poptr1|646081,Poptr1|575806  
Poptr1|356881  
AT3G19860 Poptr1|694208,Poptr1|697213  
AT4G36060  
AT5G45760 Poptr1|728143  
AT5G26180 Poptr1|561616  
AT5G56900 Poptr1|589197  
AT2G07440 Poptr1|595135  
Poptr1|56907,Poptr1|574441,Poptr1|692733  
AT1G74890,AT1G19050  
Poptr1|696301,Poptr1|696232  
AT2G41310  
AT1G59940,AT1G10470  
AT5G62920,AT3G48100 Poptr1|666400  
AT3G57040  
Poptr1|693167,Poptr1|708486  
Poptr1|351425,Poptr1|57928  
AT2G40670,AT3G56380 Poptr1|574122  
AT1G30070 Poptr1|675455  
AT2G30860,AT2G30870  
AT2G47730 Poptr1|573435,Poptr1|730648  
AT3G62760 Poptr1|688399  
AT3G03190,AT5G17220 Poptr1|592808,Poptr1|689660  
Poptr1|550819,Poptr1|684666  
AT1G49860  
AT1G02930,AT1G02920,AT4G02520,AT2G02930,AT1G02950,AT1G02940  
AT4G29870,AT2G19340 Poptr1|578998,Poptr1|560638  
Poptr1|586468  
AT4G30000,AT1G69190 Poptr1|564314  
AT1G69030,AT1G26300 Poptr1|354088,Poptr1|687210  
AT3G24820 Poptr1|645413  
Poptr1|64706  
AT1G07010 Poptr1|557612  
AT1G71440 Poptr1|702519  
AT3G13970,AT1G54210

Poptr1|582405,Poptr1|343305,Poptr1|582404  
AT4G35910 Poptr1|560508  
AT5G45320 Poptr1|349392,Poptr1|60089  
AT5G06830  
Poptr1|576283,Poptr1|745609  
AT5G26805,AT1G78640,AT4G05630,AT2G36920,AT4G02870,AT2G33720  
Poptr1|585119,Poptr1|555102,Poptr1|545342  
AT1G71780 Poptr1|693071  
AT4G24290 Poptr1|745544  
Poptr1|65188,Poptr1|743087  
Poptr1|572907,Poptr1|348890  
AT1G28380 Poptr1|690116,Poptr1|555765  
AT1G29690 Poptr1|568494,Poptr1|545115  
Poptr1|560983,Poptr1|688867  
AT1G14780 Poptr1|726774,Poptr1|345337  
AT1G08520 Poptr1|64233,Poptr1|650100  
Poptr1|555140,Poptr1|639757  
AT5G43150 Poptr1|644047  
AT4G28030 Poptr1|561400  
AT5G38110,AT1G66740  
Poptr1|648064,Poptr1|711472  
Poptr1|356566,Poptr1|743214  
Poptr1|593281  
Poptr1|592831,Poptr1|592828,Poptr1|556072  
Poptr1|102214  
Poptr1|593282,Poptr1|556073  
Poptr1|648219  
AT4G15570  
Poptr1|660023  
Poptr1|104055  
Poptr1|592823  
AT1G16800  
Poptr1|353111,Poptr1|576330  
AT2G03270 Poptr1|695521  
Poptr1|592827  
Poptr1|592829,Poptr1|592826  
Poptr1|545570  
AT1G65810,AT1G65780  
AT2G19120,AT4G30100 Poptr1|716529,Poptr1|342467  
AT5G47010  
AT5G52090,AT5G37150,AT5G37140,AT5G37160,AT5G37030,AT4G05540  
AT3G45020 Poptr1|650513,Poptr1|673380  
AT5G67620 Poptr1|663685,Poptr1|696197  
AT5G50090  
Poptr1|663684  
AT1G10530,AT1G60010 Poptr1|566326,Poptr1|657091  
AT5G62900  
AT3G07910 Poptr1|649853,Poptr1|641469,Poptr1|647300  
AT3G56230 Poptr1|681220  
AT1G78995  
Poptr1|696205  
AT5G09240,AT5G09250 Poptr1|650644,Poptr1|654688  
Poptr1|669297  
Poptr1|640391,Poptr1|554456  
AT5G53250  
AT3G61640,AT2G46330 Poptr1|572354  
AT5G24105 Poptr1|586571,Poptr1|569476  
AT4G10890 Poptr1|349871  
AT1G54070 Poptr1|584142,Poptr1|597036,Poptr1|693661  
AT5G47880  
AT3G26618,AT1G12920  
Poptr1|104075,Poptr1|63209,Poptr1|350541  
Poptr1|646915,Poptr1|554651,Poptr1|548144,Poptr1|572832  
AT3G01960 Poptr1|549720,Poptr1|597136  
AT1G24480 Poptr1|565104,Poptr1|565955  
AT4G24805  
AT3G01910 Poptr1|683949  
AT3G55620  
Poptr1|558754,Poptr1|695997  
Poptr1|47368  
Poptr1|696974  
AT2G39820  
AT2G06520 Poptr1|739111,Poptr1|745104,Poptr1|685576  
AT5G61800 Poptr1|356171  
AT1G10330 Poptr1|100057,Poptr1|355906  
Poptr1|347329  
AT3G63370 Poptr1|594721,Poptr1|559609  
AT3G02010 Poptr1|348908  
AT4G25270 Poptr1|575675  
AT5G08310 Poptr1|562800  
AT4G31070  
Poptr1|643246

AT3G58590 Poptr1|574353  
 AT1G77010 Poptr1|347187  
 AT3G01580  
 AT5G09950 Poptr1|102499,Poptr1|582730,Poptr1|595769,Poptr1|582728  
 AT2G22070 Poptr1|562662  
 AT1G16480 Poptr1|695983  
 AT1G71460 Poptr1|574196  
 AT1G31920 Poptr1|346275  
 AT4G16835 Poptr1|343429  
 AT1G53600  
 AT3G16610 Poptr1|583511  
 AT1G22830,AT1G71490 Poptr1|574190  
 Poptr1|575488,Poptr1|590697  
 AT2G44880  
 Poptr1|582951  
 Poptr1|563428,Poptr1|594323  
 Poptr1|569588  
 AT2G13600 Poptr1|562480  
 AT5G03800 Poptr1|576769  
 AT2G39620 Poptr1|344961  
 AT4G32430  
 Poptr1|570085  
 Poptr1|557720  
 AT3G53360  
 AT2G25580,AT4G32450,AT2G34370,AT1G29710  
 AT4G38010 Poptr1|575764,Poptr1|356294  
 AT3G24000 Poptr1|560057  
 Poptr1|354637  
 AT3G49710  
 AT1G31430 Poptr1|580107  
 AT2G02980 Poptr1|567042  
 AT5G44230 Poptr1|593895  
 AT5G06540 Poptr1|58016  
 AT5G15340 Poptr1|58405  
 AT5G19020 Poptr1|565654  
 AT3G11460Poptr1|561490  
 AT1G69350 Poptr1|566964,Poptr1|345141  
 AT3G21470 Poptr1|347165  
 Poptr1|645895  
 AT4G08210 Poptr1|551496  
 AT3G18970 Poptr1|63012  
 Poptr1|63747  
 AT1G33350  
 AT5G50990 Poptr1|356159  
 Poptr1|573430,Poptr1|572721  
 AT5G46460  
 AT3G08820 Poptr1|344331,Poptr1|577100  
 AT2G03380 Poptr1|353904,Poptr1|566965  
 Poptr1|545267  
 AT1G71420 Poptr1|592382  
 Poptr1|641134  
 Poptr1|59551  
 AT3G26540 Poptr1|551386  
 AT1G74600  
 AT3G15130 Poptr1|344689  
 AT5G37570 Poptr1|561456  
 AT1G05750 Poptr1|48939  
 AT1G06145 Poptr1|349130  
 AT3G14730 Poptr1|560820  
 Poptr1|548429  
 Poptr1|99534  
 AT4G15720 Poptr1|60584  
 AT3G22150 Poptr1|560130  
 AT1G14470 Poptr1|597088  
 Poptr1|65924  
 AT4G19220  
 Poptr1|674844  
 Poptr1|348483,Poptr1|589604,Poptr1|588508,Poptr1|64556,Poptr1|592842,Poptr1|63583,Poptr1|546331  
 AT4G14050 Poptr1|65035  
 AT3G26630 Poptr1|106786,Poptr1|105927  
 AT4G16470  
 AT3G49740 Poptr1|558862  
 Poptr1|106521,Poptr1|564850  
 Poptr1|585036  
 Poptr1|106360  
 AT5G04780 Poptr1|567909  
 AT2G37310 Poptr1|352555  
 AT4G37170 Poptr1|668646  
 AT3G12770 Poptr1|571851  
 AT1G06140,AT2G17210  
 AT5G08490 Poptr1|556285  
 AT1G04840 Poptr1|549815

AT3G22690  
 Poptr1|570460  
 AT4G18840  
 AT3G22690  
 AT1G74400  
 AT3G04750 Poptr1|571040  
 AT5G66520  
 AT1G18485 Poptr1|574890  
 Poptr1|60562  
 AT4G18520 Poptr1|559157  
 Poptr1|588405,Poptr1|59432  
 AT3G57430 Poptr1|63283  
 AT2G21090 Poptr1|546205  
 AT4G01030  
 AT2G03880 Poptr1|59894  
 AT5G40405  
 AT2G33680 Poptr1|570696  
 AT5G15300 Poptr1|577670  
 AT2G15690  
 AT2G33760 Poptr1|580902,Poptr1|555801  
 AT4G39530  
 Poptr1|97023,Poptr1|575042,Poptr1|355082  
 Poptr1|561879  
 AT5G43790  
 Poptr1|592839  
 AT1G31790  
 AT3G13880  
 Poptr1|656737  
 AT4G18750 Poptr1|555652  
 Poptr1|584464  
 AT5G52630  
 AT1G62260 Poptr1|557042  
 Poptr1|560528  
 AT1G08070 Poptr1|578087  
 AT2G46050  
 AT1G19720  
 AT5G48910 Poptr1|57402  
 Poptr1|551902  
 Poptr1|576004  
 AT4G04370  
 Poptr1|564398,Poptr1|581687  
 AT1G03510  
 AT1G17630 Poptr1|100353  
 AT1G11290Poptr1|343907  
 AT1G74630 Poptr1|59986  
 AT2G34400  
 Poptr1|63237,Poptr1|646936  
 AT4G33170  
 Poptr1|579041,Poptr1|560671  
 AT5G39350 Poptr1|556345  
 Poptr1|589132,Poptr1|101373,Poptr1|570356,Poptr1|349352  
 AT4G22760 Poptr1|97319,Poptr1|554250  
 AT5G47460  
 AT3G49140  
 AT3G14330 Poptr1|343053  
 AT2G29760 Poptr1|557940  
 Poptr1|96816  
 AT2G36980 Poptr1|565770  
 AT1G15510 Poptr1|553676  
 AT4G14820 Poptr1|55123  
 AT3G02330 Poptr1|99303  
 AT1G56690,AT1G09410 Poptr1|581633  
 Poptr1|561111  
 AT2G01510 Poptr1|570395  
 AT3G20730 Poptr1|53265  
 Poptr1|595349,Poptr1|577677,Poptr1|577678  
 AT4G35130 Poptr1|556673  
 Poptr1|102525,Poptr1|71499  
 Poptr1|578125  
 Poptr1|577719,Poptr1|347932  
 AT1G77150,AT1G77170  
 AT3G23330 Poptr1|548887  
 AT3G47840 Poptr1|53394  
 AT5G40410 Poptr1|346624  
 AT5G08510 Poptr1|552315  
 AT1G09220 Poptr1|56697  
 Poptr1|101377,Poptr1|741110,Poptr1|584676,Poptr1|582952,Poptr1|584587  
 Poptr1|56662  
 AT5G46440 Poptr1|562069  
 AT3G49170  
 AT5G50390 Poptr1|666660  
 AT5G55740 Poptr1|561131  
 Poptr1|61024

AT5G56310 Poptr1|343926  
 AT4G21300 Poptr1|56085  
 Poptr1|561681  
 AT1G34160 Poptr1|72661  
 AT2G37320 Poptr1|561533  
 AT5G16860 Poptr1|569383  
 AT4G39952 Poptr1|71624  
 Poptr1|581670  
 AT2G04860 Poptr1|740387  
 AT1G23450,AT3G09040  
 Poptr1|552656,Poptr1|58057  
 AT3G47530 Poptr1|553847  
 AT3G29230 Poptr1|556353  
 AT3G25970 Poptr1|562070  
 AT2G36730 Poptr1|668579  
 Poptr1|63582  
 Poptr1|99878  
 AT2G27610 Poptr1|556987,Poptr1|546758  
 Poptr1|591419,Poptr1|594707  
 AT2G35030 Poptr1|576187  
 AT4G33990  
 AT3G03580  
 AT3G05340 Poptr1|570829  
 AT3G61170Poptr1|347931  
 AT4G37380 Poptr1|61292  
 Poptr1|586563  
 Poptr1|648271  
 AT3G15930 Poptr1|592703  
 AT4G30700 Poptr1|653602  
 AT5G39680 Poptr1|577661  
 Poptr1|344554  
 AT5G27110  
 AT3G18840 Poptr1|556439,Poptr1|556442,Poptr1|54469  
 AT2G45350 Poptr1|572100  
 AT1G32415 Poptr1|580122  
 AT1G64310 Poptr1|57616  
 AT4G14170  
 AT3G05240  
 Poptr1|61341  
 AT1G43980 Poptr1|596699,Poptr1|347186,Poptr1|72527  
 AT2G02750  
 AT3G46790 Poptr1|54731  
 Poptr1|593718  
 AT5G59600 Poptr1|549139  
 AT5G42450  
 AT3G51320  
 Poptr1|558109  
 AT5G52850 Poptr1|556121  
 AT2G20540  
 AT1G26900  
 AT2G22410 Poptr1|547877  
 AT4G02750 Poptr1|345807  
 AT4G20770  
 Poptr1|102500  
 Poptr1|561808  
 AT1G28690 Poptr1|555708  
 AT2G41080  
 AT5G13270 Poptr1|548091  
 Poptr1|646889  
 AT1G03540 Poptr1|571776  
 AT1G50270 Poptr1|550230  
 AT3G62890 Poptr1|550666  
 AT4G13650 Poptr1|56717  
 Poptr1|353030  
 AT3G26780 Poptr1|65031  
 AT3G13770 Poptr1|701364  
 AT5G59200 Poptr1|348938  
 AT1G68930 Poptr1|55303  
 Poptr1|102537  
 AT5G13230 Poptr1|63190,Poptr1|554711  
 AT3G50420 Poptr1|558825  
 AT2G42920 Poptr1|52067  
 AT2G40720 Poptr1|571676  
 AT1G13410 Poptr1|564537  
 Poptr1|593145  
 AT5G65570  
 AT1G59720  
 AT5G66500 Poptr1|563182  
 AT3G28640,AT3G28660  
 AT3G25060 Poptr1|553193  
 Poptr1|578518  
 AT1G56570 Poptr1|97618,Poptr1|570695

AT1G20230 Poptr1|642949  
AT1G25360 Poptr1|643026  
Poptr1|101719,Poptr1|347498  
AT3G56550  
Poptr1|108183  
Poptr1|596879  
Poptr1|60624  
AT4G14850 Poptr1|55126  
Poptr1|105589  
Poptr1|109236,Poptr1|343374,Poptr1|105003,Poptr1|106000,Poptr1|58556  
Poptr1|61238,Poptr1|349391,Poptr1|106383  
Poptr1|106719,Poptr1|101633  
Poptr1|60947,Poptr1|58209,Poptr1|108016,Poptr1|101658,Poptr1|100898,Poptr1|106470  
Poptr1|61222  
Poptr1|344485  
Poptr1|105491  
Poptr1|60019,Poptr1|103344,Poptr1|103778,Poptr1|99719,Poptr1|104402,Poptr1|355651,Poptr1|355067,  
Poptr1|100881,Poptr1|108852,Poptr1|357116  
Poptr1|103135,Poptr1|674036  
Poptr1|101860  
Poptr1|104466,Poptr1|61274,Poptr1|107667,Poptr1|98921,Poptr1|100828,Poptr1|103127,Poptr1|101207,  
Poptr1|103020  
Poptr1|105893,Poptr1|546613  
Poptr1|105904  
Poptr1|98403  
Poptr1|673927,Poptr1|587301  
Poptr1|103534  
Poptr1|75818,Poptr1|61614,Poptr1|103960,Poptr1|58890  
Poptr1|106871  
Poptr1|98797  
Poptr1|103709,Poptr1|349143,Poptr1|102079,Poptr1|60955,Poptr1|100093,Poptr1|107124,Poptr1|100820  
Poptr1|63778  
Poptr1|573198,Poptr1|586321,Poptr1|596938,Poptr1|354456,Poptr1|577540,Poptr1|72174,Poptr1|102560,  
Poptr1|101659,Poptr1|57429,Poptr1|108060,Poptr1|101410,Poptr1|671639,Poptr1|103335,Poptr1|552703,Poptr1|573  
748,Poptr1|582074  
Poptr1|587300,Poptr1|583142,Poptr1|647538,Poptr1|107576,Poptr1|676019,Poptr1|351234,Poptr1|59742  
9,Poptr1|99401  
Poptr1|106827,Poptr1|101473,Poptr1|103077  
Poptr1|103738,Poptr1|53095,Poptr1|103727,Poptr1|99988,Poptr1|104190,Poptr1|103668,Poptr1|105628,  
Poptr1|100639,Poptr1|101548  
Poptr1|102006  
Poptr1|563242,Poptr1|106724  
AT3G29785  
Poptr1|571255,Poptr1|107284,Poptr1|574388,Poptr1|576880,Poptr1|591042,Poptr1|591040,Poptr1|58862  
3,Poptr1|566172,Poptr1|583767,Poptr1|591636,Poptr1|585331,Poptr1|349344,Poptr1|105785,Poptr1|582784,Poptr1|9  
9310,Poptr1|103846,Poptr1|108038,Poptr1|101744,Poptr1|98269,Poptr1|559773,Poptr1|101019,Poptr1|585943  
Poptr1|102315,Poptr1|585291  
AT2G07340 Poptr1|682270  
AT5G02502 Poptr1|656073,Poptr1|567443,Poptr1|563880  
AT3G26580 Poptr1|663461  
Poptr1|653629,Poptr1|47897  
AT2G23940,AT4G30500  
AT1G33265 Poptr1|581103,Poptr1|569220  
AT1G67460  
AT1G67440 Poptr1|560282  
AT5G38060 Poptr1|593921,Poptr1|645295  
AT3G62580 Poptr1|684263  
AT1G05460 Poptr1|102257  
Poptr1|75921  
AT2G30880 Poptr1|714891,Poptr1|643362  
AT1G71050,AT1G22990  
AT1G66240 Poptr1|655799,Poptr1|47389  
AT1G06330 Poptr1|580340  
Poptr1|687165  
Poptr1|565502  
AT5G17450 Poptr1|692123  
AT4G27590 Poptr1|569672  
AT4G35060,AT4G38580 Poptr1|721689,Poptr1|648797,Poptr1|649212  
Poptr1|559999  
AT5G66110  
AT4G39700 Poptr1|695902,Poptr1|71682  
Poptr1|593815  
Poptr1|351304  
AT1G29100 Poptr1|104582,Poptr1|545187  
AT3G56240  
Poptr1|584536  
AT3G48970 Poptr1|575823  
AT4G08570 Poptr1|51942,Poptr1|651334,Poptr1|342461,Poptr1|97565  
AT2G18196 Poptr1|642538,Poptr1|569245  
AT5G59540,AT5G59530,AT1G04380,AT1G04350,AT5G43450,AT5G43440  
AT3G47190,AT5G58660 Poptr1|706566

Poptr1|72519,Poptr1|694591,Poptr1|685156,Poptr1|53144  
Poptr1|559675,Poptr1|569084  
AT1G02400 Poptr1|348383,Poptr1|57164  
AT3G50210,AT3G49620,AT3G49630  
Poptr1|577357,Poptr1|577360,Poptr1|673955,Poptr1|594229  
AT3G51240 Poptr1|703378  
Poptr1|350024,Poptr1|342752  
Poptr1|551056  
Poptr1|54771  
AT1G52790 Poptr1|709592  
AT4G22880 Poptr1|548547,Poptr1|682056  
AT1G80340,AT1G15550 Poptr1|48812,Poptr1|349528  
Poptr1|595272  
Poptr1|566450  
Poptr1|65791  
AT3G60290,AT2G44800  
AT1G17010,AT1G17020,AT4G25300,AT4G25310,AT1G78550  
Poptr1|105969,Poptr1|550348,Poptr1|684065,Poptr1|642190  
AT5G07480 Poptr1|63322  
Poptr1|694594  
Poptr1|686051  
AT1G55290,AT3G13610 Poptr1|62715,Poptr1|639660  
Poptr1|583276,Poptr1|583277,Poptr1|645173,Poptr1|580445,Poptr1|596684  
AT3G21420 Poptr1|581787,Poptr1|54952  
AT5G05600,AT3G11180,AT3G55970  
Poptr1|698494,Poptr1|353685,Poptr1|351920,Poptr1|688835,Poptr1|653131  
Poptr1|550094  
AT4G23340 Poptr1|350233  
Poptr1|645172,Poptr1|692157,Poptr1|342251,Poptr1|715135,Poptr1|546523,Poptr1|355430,Poptr1|55967  
4,Poptr1|552892  
AT5G12270  
AT2G06960,AT2G36690 Poptr1|698707  
AT1G52810,AT1G28030  
AT5G51810,AT4G25420 Poptr1|666953,Poptr1|346112,Poptr1|347900  
AT2G34555,AT1G30040 Poptr1|642398,Poptr1|550316,Poptr1|698991,Poptr1|546400  
Poptr1|581970,Poptr1|97838,Poptr1|559681,Poptr1|551050,Poptr1|551051  
AT4G10490,AT4G10500 Poptr1|550478,Poptr1|56061,Poptr1|57123,Poptr1|585537,Poptr1|65793  
Poptr1|344700,Poptr1|578150  
Poptr1|557330  
AT5G63590,AT5G08640,AT5G43935,AT5G63580,AT5G63600,AT5G63595  
Poptr1|569976  
AT1G47990  
Poptr1|583422  
Poptr1|104043  
AT3G19000 Poptr1|682489  
AT4G03070  
AT4G21200 Poptr1|555375,Poptr1|568216  
Poptr1|740865  
Poptr1|63731,Poptr1|63726  
Poptr1|571490  
Poptr1|550472,Poptr1|569254,Poptr1|65790,Poptr1|569255,Poptr1|705513,Poptr1|582576  
Poptr1|590159  
Poptr1|674620  
AT4G16765,AT4G16770 Poptr1|684983  
Poptr1|548640  
Poptr1|558157  
AT1G62380,AT1G12010  
AT1G03400,AT1G03410,AT1G06620,AT3G61400,AT1G06640,AT1G06650,AT2G25450,AT2G30830,AT2G30840  
Poptr1|569316,Poptr1|55078  
AT2G19590 Poptr1|561093  
AT3G46500,AT3G46480,AT3G46490,AT1G35190  
AT5G20550,AT5G20400,AT1G49390,AT5G54000  
Poptr1|106084,Poptr1|98749,Poptr1|578862,Poptr1|593508,Poptr1|578863  
Poptr1|723959,Poptr1|353992  
AT4G03060,AT4G03050  
Poptr1|354395  
AT5G24530 Poptr1|574636,Poptr1|569679  
AT3G19010  
Poptr1|108353,Poptr1|550471  
AT1G44090  
AT1G15540,AT1G80320  
Poptr1|562872,Poptr1|76010  
Poptr1|581464  
AT2G38240  
AT5G51310  
AT1G05010 Poptr1|704904,Poptr1|568162,Poptr1|573016,Poptr1|552732  
AT4G21690 Poptr1|352859,Poptr1|578149  
AT5G07200,AT1G60980  
Poptr1|704457,Poptr1|690250,Poptr1|671897,Poptr1|649117,Poptr1|689203,Poptr1|342436  
Poptr1|351586,Poptr1|583657  
AT4G16330  
Poptr1|552887

AT1G14120,AT1G14130 Poptr1|569214,Poptr1|691928  
AT1G52820 Poptr1|548641  
Poptr1|594038  
Poptr1|727538  
AT1G78440  
AT3G12900 Poptr1|51800  
AT1G77330 Poptr1|559288,Poptr1|710897  
AT4G22870  
Poptr1|56663  
Poptr1|593107  
Poptr1|592689  
AT1G52800  
AT1G80330  
Poptr1|548643  
AT1G50960 Poptr1|569082,Poptr1|569083,Poptr1|102004  
AT1G32280,AT5G56480 Poptr1|580155  
AT1G34350 Poptr1|574299,Poptr1|703191  
AT1G14900 Poptr1|692140,Poptr1|555965,Poptr1|558473,Poptr1|354274,Poptr1|566465  
AT2G41770,AT3G57420 Poptr1|560505,Poptr1|688722  
AT2G43760 Poptr1|706483  
AT2G01410 Poptr1|676402,Poptr1|589611  
AT5G45990,AT3G13210,AT5G41770,AT3G51110 Poptr1|684855,Poptr1|63452  
AT5G53530,AT4G27690 Poptr1|746044,Poptr1|717432  
Poptr1|650366,Poptr1|583395  
AT2G21870 Poptr1|558631,Poptr1|686010  
AT1G04550,AT2G33310 Poptr1|354624,Poptr1|725947  
AT4G32280 Poptr1|578920,Poptr1|351587,Poptr1|561907  
AT1G80390 Poptr1|640676  
AT5G25890  
Poptr1|577918,Poptr1|561730  
AT2G01200,AT1G15050 Poptr1|55252  
AT2G22670 Poptr1|643908  
AT5G65670  
AT4G14550,AT3G23050 Poptr1|658430,Poptr1|720961  
AT1G04240,AT5G43700  
Poptr1|662927,Poptr1|595419,Poptr1|346904,Poptr1|694737,Poptr1|726441,Poptr1|564913  
AT4G28640 Poptr1|645563  
AT1G52830,AT3G15540 Poptr1|63754,Poptr1|640677,Poptr1|685029  
AT1G04250  
AT4G29080 Poptr1|64037,Poptr1|711734,Poptr1|584053  
AT1G15580  
AT3G62100,AT2G46990 Poptr1|644939,Poptr1|664248  
AT3G17600  
AT1G51950,AT3G16500 Poptr1|646006,Poptr1|640933  
AT3G23030,AT4G14560  
AT1G04100  
AT3G04730 Poptr1|643213,Poptr1|651846,Poptr1|687970  
AT4G32760 Poptr1|701964,Poptr1|344676  
AT5G63640 Poptr1|97947  
Poptr1|573625,Poptr1|642114  
AT5G01760,AT2G38410 Poptr1|560969  
AT3G08790  
AT1G21380,AT1G76970 Poptr1|559305,Poptr1|551388  
AT1G77890  
AT4G08540 Poptr1|684489  
Poptr1|103647  
AT5G17990 Poptr1|575183,Poptr1|728839  
AT1G28420 Poptr1|580947,Poptr1|545258  
AT4G12750 Poptr1|573159  
AT5G44180 Poptr1|562180,Poptr1|594629  
AT2G12290  
AT3G12920 Poptr1|690551,Poptr1|569175  
AT1G79110  
AT4G19700,AT5G45100 Poptr1|586745,Poptr1|666839  
AT3G05410 Poptr1|570811,Poptr1|97731  
AT2G19870 Poptr1|584356,Poptr1|96930  
AT3G62370 Poptr1|572596  
AT2G15860 Poptr1|697310  
AT2G37025 Poptr1|676030  
AT1G72650,AT1G17460 Poptr1|548585,Poptr1|553628  
AT1G58766,AT1G59077,AT1G59453,AT1G17450 Poptr1|553625  
AT5G40890,AT3G27170 Poptr1|691638  
AT5G33280 Poptr1|690389  
AT5G49890 Poptr1|60067,Poptr1|583472  
AT5G26240 Poptr1|55143  
Poptr1|354448,Poptr1|585127,Poptr1|573557  
AT5G59960 Poptr1|549198,Poptr1|723319  
AT4G25690,AT4G25670,AT5G52550 Poptr1|592862,Poptr1|648203  
AT1G62830 Poptr1|579699,Poptr1|63440,Poptr1|73126,Poptr1|550801  
AT4G29720 Poptr1|561090  
AT4G16310 Poptr1|346731,Poptr1|73001  
AT3G10390 Poptr1|567658,Poptr1|353344



AT3G13682 Poptr1|568963  
AT5G08120 Poptr1|714433  
AT1G74270,AT1G07070,AT1G41880,AT3G55750  
Poptr1|659638,Poptr1|656186,Poptr1|682431,Poptr1|567324  
AT3G09050 Poptr1|560878  
AT3G48480 Poptr1|575302,Poptr1|698456  
Poptr1|659801,Poptr1|563805  
AT3G55005,AT3G55000  
AT2G46040 Poptr1|644482,Poptr1|572279  
AT4G11400Poptr1|350252,Poptr1|63521  
AT5G66005 Poptr1|748589,Poptr1|558783  
AT3G09810,AT5G03290 Poptr1|702741  
AT2G17130  
AT4G35650  
Poptr1|721283,Poptr1|703569,Poptr1|695999,Poptr1|558763  
AT1G32480  
AT4G35260  
AT5G52980 Poptr1|712673  
AT5G66420 Poptr1|593906,Poptr1|76339,Poptr1|593905  
AT1G11930Poptr1|574708  
Poptr1|99331  
AT4G26860  
AT4G28180 Poptr1|75868,Poptr1|71751  
AT4G01860 Poptr1|348407  
AT5G47620  
AT5G62110  
AT4G13850,AT3G23830  
Poptr1|580615,Poptr1|569413  
Poptr1|550162,Poptr1|568529,Poptr1|344017,Poptr1|667109  
AT5G55550,AT4G26650  
AT1G17640 Poptr1|582442,Poptr1|592784  
Poptr1|680844,Poptr1|699478  
AT1G58470 Poptr1|572005,Poptr1|347555  
Poptr1|343217,Poptr1|573400  
AT1G60650  
AT5G06210 Poptr1|653699  
AT3G13224 Poptr1|691842  
AT2G16260  
AT5G54580 Poptr1|663318,Poptr1|687614  
AT3G07810 Poptr1|732394,Poptr1|342995  
Poptr1|707174,Poptr1|679310,Poptr1|742773  
AT4G14300  
Poptr1|667110  
AT3G08000 Poptr1|348596,Poptr1|573002  
Poptr1|577481,Poptr1|549550  
AT5G04280 Poptr1|687403,Poptr1|655849  
AT4G36960 Poptr1|696028,Poptr1|651076  
AT2G33410 Poptr1|354608,Poptr1|565807  
AT1G18630  
AT4G13860  
AT2G21690  
AT2G27330  
Poptr1|680127  
Poptr1|597696  
AT3G26420 Poptr1|705680  
Poptr1|549204  
AT1G73530  
AT2G37510  
AT1G19980 Poptr1|550885,Poptr1|715475  
AT4G22410,AT4G22350 Poptr1|560149,Poptr1|57860  
AT3G44330 Poptr1|594941,Poptr1|686595  
Poptr1|687436,Poptr1|563473  
Poptr1|583926  
AT5G49830  
AT1G10180 Poptr1|61253,Poptr1|57735  
Poptr1|593020  
AT1G10385 Poptr1|352190,Poptr1|576432  
Poptr1|691352,Poptr1|697579  
AT5G58640,AT3G47300 Poptr1|735861  
Poptr1|583540,Poptr1|596115  
AT5G25260,AT5G25250,AT5G64870 Poptr1|561942  
AT1G32060  
Poptr1|554091,Poptr1|702966  
AT4G26990,AT5G54920 Poptr1|569130,Poptr1|571555  
Poptr1|572951  
Poptr1|681485  
AT1G02190,AT2G37700  
AT1G02205  
Poptr1|700690  
Poptr1|681486  
AT5G57800 Poptr1|108164,Poptr1|344516,Poptr1|689147  
AT2G25740 Poptr1|695053,Poptr1|578031

AT2G02590 Poptr1|565426  
AT1G18440 Poptr1|682782  
Poptr1|581118  
AT5G16140 Poptr1|648034  
AT5G19830 Poptr1|547603,Poptr1|708279  
AT5G38290  
AT2G43340 Poptr1|679554,Poptr1|695781  
AT1G05870,AT2G31560  
AT2G38905 Poptr1|567552,Poptr1|563785  
AT2G24040,AT4G28088  
AT1G57550  
AT3G05880,AT3G05890  
Poptr1|690193  
Poptr1|570651,Poptr1|671489  
AT4G30660 Poptr1|695210,Poptr1|669569  
AT4G30650  
AT1G09130 Poptr1|699732  
AT1G49970 Poptr1|642086,Poptr1|673718,Poptr1|682499  
Poptr1|577486  
AT5G40670 Poptr1|577487,Poptr1|577488  
AT4G32360 Poptr1|684176  
AT1G10690 Poptr1|565168,Poptr1|566023  
AT3G27630,AT5G40460 Poptr1|577483  
AT2G38700,AT3G54250 Poptr1|660167,Poptr1|655777  
AT2G46220 Poptr1|572328  
AT1G16320,AT1G79510 Poptr1|353811  
AT3G20020 Poptr1|571961,Poptr1|696218  
AT1G04870 Poptr1|705132  
AT3G12270 Poptr1|62880  
Poptr1|672433,Poptr1|561069  
AT4G29510,AT2G19670  
AT2G39090 Poptr1|97647,Poptr1|686996  
AT5G04670 Poptr1|655804,Poptr1|660188  
AT4G14605 Poptr1|585236  
AT5G54180  
AT4G02990  
AT2G44020 Poptr1|678072  
AT4G38160 Poptr1|556744  
AT1G78170,AT1G22250,AT4G08910 Poptr1|643762,Poptr1|651288  
Poptr1|593739  
AT5G55000 Poptr1|738511  
AT5G06660,AT3G12030 Poptr1|667506  
AT1G03160 Poptr1|551181,Poptr1|559548  
AT1G09010 Poptr1|687932  
AT3G02720 Poptr1|592138,Poptr1|592872,Poptr1|678279  
AT2G38860,AT3G54600  
Poptr1|670673,Poptr1|714282,Poptr1|714275  
AT5G11260Poptr1|561872,Poptr1|58550  
AT3G17609 Poptr1|657788  
AT3G11710Poptr1|578577,Poptr1|705281,Poptr1|743408  
Poptr1|108481  
AT3G13490  
AT2G38920 Poptr1|576441,Poptr1|685659  
AT1G02860 Poptr1|644742,Poptr1|572701  
Poptr1|552321,Poptr1|576244  
AT4G11380,AT4G23460 Poptr1|350257,Poptr1|709305  
AT5G11490Poptr1|695029  
AT2G38170,AT3G51860 Poptr1|668025,Poptr1|653119  
Poptr1|48970  
AT5G01490  
AT1G55730,AT1G55720,AT3G13320 Poptr1|582550,Poptr1|708170  
AT1G55910 Poptr1|592135,Poptr1|642294  
AT5G59520  
AT3G02370,AT3G57360 Poptr1|592849  
AT4G19210 Poptr1|703832,Poptr1|712264  
AT4G30300 Poptr1|596868  
AT3G13640  
AT5G12980  
AT2G32550  
AT3G20800 Poptr1|707581,Poptr1|55829  
AT1G22980,AT1G22970,AT1G71150 Poptr1|55243,Poptr1|564579  
AT4G33010,AT2G26080  
Poptr1|577943,Poptr1|577945,Poptr1|685558  
Poptr1|670531  
AT5G26820 Poptr1|97637  
Poptr1|589225  
Poptr1|579791  
AT5G24020 Poptr1|714241  
AT3G49790  
AT1G10150,AT1G59510 Poptr1|347564,Poptr1|663714  
Poptr1|571990,Poptr1|563340  
AT3G06600 Poptr1|659106,Poptr1|354010,Poptr1|570304

Poptr1|663271,Poptr1|571399  
AT1G64970  
AT4G01120  
AT4G36730 Poptr1|719452,Poptr1|593965  
AT1G32150,AT2G35530 Poptr1|349938,Poptr1|590067  
AT2G46270 Poptr1|731253,Poptr1|552242  
AT3G58850,AT2G42870 Poptr1|643394,Poptr1|651666  
AT3G44530 Poptr1|546332,Poptr1|697140,Poptr1|109287  
AT1G15130 Poptr1|658315,Poptr1|696542  
AT4G19985 Poptr1|581043  
AT3G13200 Poptr1|550238  
AT1G09230  
Poptr1|573888,Poptr1|729948  
AT2G36885 Poptr1|735575  
AT1G22060 Poptr1|682154,Poptr1|676111,Poptr1|667028,Poptr1|651339  
Poptr1|651338,Poptr1|710899  
AT3G62940  
Poptr1|572740  
AT2G17300,AT4G35320 Poptr1|595021,Poptr1|556760  
AT4G29890 Poptr1|351645  
AT3G46560 Poptr1|569404  
AT5G02120 Poptr1|653008  
AT5G02640 Poptr1|344563,Poptr1|576613  
AT3G46310,AT3G46300  
AT4G21780 Poptr1|593523,Poptr1|694065  
Poptr1|643578,Poptr1|559284  
Poptr1|654686  
Poptr1|562513  
AT1G21610,AT1G77310 Poptr1|71564,Poptr1|551413  
AT5G03406,AT3G46100 Poptr1|595687,Poptr1|589474  
AT3G46970 Poptr1|723127  
AT3G29320 Poptr1|712800  
Poptr1|55374,Poptr1|564279  
Poptr1|713920  
AT1G27600 Poptr1|710872  
AT2G37090 Poptr1|584099,Poptr1|735460,Poptr1|702714  
Poptr1|578089,Poptr1|344673  
AT1G23010,AT1G71040  
Poptr1|105610  
Poptr1|652859  
AT2G19270  
AT3G13930,AT1G54220 Poptr1|681657,Poptr1|685065  
AT3G52200 Poptr1|696977  
Poptr1|583759  
AT3G06850 Poptr1|596120  
AT3G11620Poptr1|735278  
AT1G49475 Poptr1|591695,Poptr1|596796,Poptr1|76194  
AT1G49480 Poptr1|744206,Poptr1|104824  
AT3G18990  
Poptr1|581459  
Poptr1|581458,Poptr1|581457  
AT3G56820 Poptr1|560292  
AT4G36630 Poptr1|686085,Poptr1|703414  
Poptr1|567832,Poptr1|594286,Poptr1|344830,Poptr1|549022  
Poptr1|347326  
Poptr1|642918  
AT2G41070,AT3G56850 Poptr1|344053  
AT3G44460  
AT2G07739  
Poptr1|587236,Poptr1|591500,Poptr1|580560,Poptr1|561301,Poptr1|576303,Poptr1|590951,Poptr1|58021  
8,Poptr1|568799,Poptr1|580312,Poptr1|670538,Poptr1|670789,Poptr1|673445,Poptr1|676958  
AT5G64950  
AT1G21150,AT5G07900  
Poptr1|101263,Poptr1|544781,Poptr1|555297,Poptr1|568035,Poptr1|567155,Poptr1|581773,Poptr1|58177  
1,Poptr1|355485,Poptr1|569735,Poptr1|575006,Poptr1|575007  
AT1G79220 Poptr1|562849  
Poptr1|547760,Poptr1|547763,Poptr1|62833,Poptr1|547757,Poptr1|547755,Poptr1|107507,Poptr1|547759,  
Poptr1|547765,Poptr1|547749,Poptr1|547754,Poptr1|547762,Poptr1|547764,Poptr1|597579,Poptr1|547758,Poptr1|54  
7756,Poptr1|555114,Poptr1|596717,Poptr1|555113,Poptr1|62879,Poptr1|547752  
AT3G54270  
Poptr1|563514  
AT1G51420,AT2G35840,AT3G52340 Poptr1|735185,Poptr1|561178  
Poptr1|691393,Poptr1|723247  
AT5G59400  
AT3G59810,AT2G43810  
Poptr1|656348,Poptr1|659407  
Poptr1|685450,Poptr1|346644,Poptr1|58010  
AT3G56150,AT3G22860  
AT2G42380,AT3G58120 Poptr1|582775,Poptr1|689310  
Poptr1|49419  
AT4G08960 Poptr1|651263,Poptr1|551596  
AT5G11430,AT5G25520,AT2G25640

Poptr1|654071,Poptr1|668974,Poptr1|578900  
Poptr1|698356  
AT2G22300 Poptr1|71635,Poptr1|562594  
AT5G09410,AT5G64220  
AT1G67310 Poptr1|554769,Poptr1|548038  
AT4G16150,AT3G16940 Poptr1|723886,Poptr1|354049  
Poptr1|591881,Poptr1|551887,Poptr1|64607,Poptr1|581590,Poptr1|545113  
Poptr1|581442  
AT1G32450 Poptr1|704006,Poptr1|356594  
AT5G01180  
AT5G13400 Poptr1|548116  
Poptr1|573227  
Poptr1|592630  
AT1G22540 Poptr1|592298,Poptr1|581151,Poptr1|592299,Poptr1|740733,Poptr1|58995  
Poptr1|577570  
AT3G54140 Poptr1|351879,Poptr1|58170  
AT4G21680  
AT2G37900,AT3G53960 Poptr1|688804,Poptr1|695404,Poptr1|686466  
AT2G26690  
Poptr1|584970,Poptr1|565429  
AT1G69850,AT1G27040  
Poptr1|554200  
AT3G25280,AT3G25260 Poptr1|349033  
AT5G46050,AT5G46040  
AT1G72140,AT1G72130  
AT3G21670 Poptr1|710420  
Poptr1|586239,Poptr1|577568  
AT5G62680,AT3G47960 Poptr1|345902  
AT1G33440  
Poptr1|570644  
AT1G68570 Poptr1|723778  
AT2G02020,AT1G62200,AT2G02040  
AT1G18880  
AT1G12110  
Poptr1|592290  
Poptr1|566635  
Poptr1|684635  
Poptr1|568907  
AT5G62730 Poptr1|569993  
AT5G19640 Poptr1|555274,Poptr1|62771  
Poptr1|349131,Poptr1|553327,Poptr1|553325  
Poptr1|595868  
AT3G45710,AT3G45700,AT3G45690,AT3G45680,AT3G45720,AT3G45660,AT3G45650 Poptr1|353444  
Poptr1|570645  
AT1G27080,AT1G69870 Poptr1|355047  
Poptr1|57910,Poptr1|560338,Poptr1|685837  
AT3G54450 Poptr1|555039,Poptr1|62902  
Poptr1|561761  
Poptr1|555040  
AT2G40460 Poptr1|574087  
AT3G01350,AT5G14940 Poptr1|555571,Poptr1|746479  
AT5G11570Poptr1|578081,Poptr1|578079,Poptr1|588692,Poptr1|594805,Poptr1|578083,Poptr1|578084  
Poptr1|581025  
Poptr1|549097,Poptr1|54713  
AT5G28470 Poptr1|351828,Poptr1|58146  
Poptr1|594806  
AT1G22550,AT1G22570,AT1G72120  
Poptr1|594098  
AT1G69860  
Poptr1|570000,Poptr1|683896  
AT2G38100 Poptr1|591174,Poptr1|592902,Poptr1|595332,Poptr1|592897  
Poptr1|355946  
AT1G52190,AT3G16180 Poptr1|548878  
Poptr1|725893,Poptr1|345460  
Poptr1|65595  
AT1G59740 Poptr1|103937,Poptr1|60074,Poptr1|583466  
AT5G61330 Poptr1|738865  
AT3G21660  
AT4G22150,AT4G04210 Poptr1|568034,Poptr1|568093,Poptr1|584720,Poptr1|704900  
AT4G15410 Poptr1|573001,Poptr1|709952  
AT3G26445,AT1G12990,AT1G67880 Poptr1|55040,Poptr1|565155  
AT2G13290 Poptr1|344172,Poptr1|578921  
AT3G01620,AT5G14480,AT3G27540 Poptr1|49166  
AT2G38880 Poptr1|655971,Poptr1|659811  
AT4G14540  
AT2G13570 Poptr1|650623  
Poptr1|556808  
Poptr1|654861,Poptr1|650804  
AT1G09030 Poptr1|60600,Poptr1|570816  
AT2G47810  
AT3G53340,AT2G37060 Poptr1|576644  
Poptr1|97693

Poptr1|652363,Poptr1|734465,Poptr1|732465  
Poptr1|664477  
AT1G21970  
AT5G47640 Poptr1|550206  
AT5G47670 Poptr1|560100  
AT5G17280 Poptr1|563235  
AT1G79040 Poptr1|569170,Poptr1|586877,Poptr1|661166,Poptr1|746726  
AT2G26270  
AT3G43930 Poptr1|352583  
AT2G44160,AT3G59970 Poptr1|704929,Poptr1|654300  
AT5G65280 Poptr1|718705,Poptr1|558500  
AT2G20770 Poptr1|730486  
AT1G52920 Poptr1|568933,Poptr1|579497  
AT1G61170,AT1G11120 Poptr1|568271,Poptr1|694020  
AT4G34600,AT2G16385 Poptr1|557216  
AT1G71920,AT5G10330 Poptr1|740661  
AT5G24330 Poptr1|355321,Poptr1|574715  
AT5G09790 Poptr1|595381,Poptr1|75574  
Poptr1|595382  
AT1G03100 Poptr1|559583,Poptr1|356538,Poptr1|580151  
AT2G37110Poptr1|675982,Poptr1|667766  
AT3G12890  
AT5G59990 Poptr1|98562  
Poptr1|743690,Poptr1|556152  
AT5G45330,AT4G19360  
AT1G26110Poptr1|698266,Poptr1|686343  
AT2G31300,AT2G30910 Poptr1|664588  
Poptr1|650946  
AT1G16520,AT1G56080  
Poptr1|650945,Poptr1|719118  
AT4G15545 Poptr1|725794  
AT5G13680 Poptr1|55547  
AT1G06225,AT2G31081 Poptr1|574354,Poptr1|592177,Poptr1|568745  
AT3G01510 Poptr1|64762  
AT2G34260 Poptr1|693901,Poptr1|711471  
Poptr1|572235  
AT2G45860  
AT5G02970,AT3G09690 Poptr1|576655  
AT2G23440 Poptr1|591897  
AT5G66815 Poptr1|562992,Poptr1|580832,Poptr1|71988  
AT5G65410  
Poptr1|554561  
AT5G39760,AT3G28920,AT5G15210 Poptr1|58385,Poptr1|545934  
AT5G60480,AT1G69600 Poptr1|353837,Poptr1|659311  
AT3G50890 Poptr1|719528,Poptr1|593930,Poptr1|559731,Poptr1|551009  
AT2G02540,AT1G14440 Poptr1|60860,Poptr1|108660  
Poptr1|571116  
Poptr1|738823,Poptr1|592275  
AT4G24660 Poptr1|643840,Poptr1|559031  
Poptr1|545846  
AT1G74660  
AT3G28917 Poptr1|556359,Poptr1|736317  
AT1G14687,AT5G42780 Poptr1|580638,Poptr1|569389  
AT1G75240,AT2G18350  
Poptr1|573738  
AT3G62630 Poptr1|570730,Poptr1|671745  
AT5G38800,AT3G30530 Poptr1|566729,Poptr1|564461,Poptr1|590335,Poptr1|60360  
AT1G68880  
AT5G08141,AT5G60830 Poptr1|574886  
AT2G04038,AT1G13600  
AT5G15830  
AT1G59530 Poptr1|347561  
AT5G27150,AT3G05030 Poptr1|570935,Poptr1|595505  
Poptr1|572747  
AT3G06370  
AT5G55470  
Poptr1|589044  
AT3G21720 Poptr1|685937,Poptr1|741351  
Poptr1|108290  
AT1G32550 Poptr1|554824,Poptr1|670409  
AT3G53920 Poptr1|716864  
AT5G13730 Poptr1|557818  
AT1G64860 Poptr1|730207,Poptr1|689261  
AT2G36990 Poptr1|589461  
AT1G08540 Poptr1|688019,Poptr1|738588  
AT1G26460 Poptr1|566937  
AT4G08510,AT1G36990 Poptr1|694538,Poptr1|347308  
AT2G04660 Poptr1|567016,Poptr1|686404  
AT5G17440,AT3G03340 Poptr1|665603,Poptr1|742740  
AT5G13780 Poptr1|691444,Poptr1|650021  
Poptr1|673340,Poptr1|679472  
AT1G78915 Poptr1|563429

Poptr1|107929,Poptr1|667345  
 AT2G41460 Poptr1|734845  
 Poptr1|351466  
 AT3G26030  
 Poptr1|578409  
 AT1G13460,AT3G26020 Poptr1|565930,Poptr1|354702  
 AT3G54930  
 AT3G21650,AT4G15415 Poptr1|684218,Poptr1|664774  
 Poptr1|354703,Poptr1|55021  
 Poptr1|557049,Poptr1|556670  
 AT5G25510 Poptr1|668978,Poptr1|561822  
 AT5G03470,AT3G09880 Poptr1|688796,Poptr1|589495  
 AT1G07970  
 Poptr1|650424,Poptr1|723522  
 AT3G45770 Poptr1|672727  
 AT4G08810 Poptr1|351016,Poptr1|48436  
 AT2G04280,AT4G12700 Poptr1|573126  
 AT5G45310 Poptr1|681134  
 AT5G48870 Poptr1|641475,Poptr1|557672  
 AT2G04550  
 Poptr1|732365  
 AT1G14450,AT2G02510 Poptr1|596794  
 AT2G35900 Poptr1|594094,Poptr1|688743  
 AT2G44360 Poptr1|583292  
 Poptr1|570141  
 Poptr1|584247  
 AT5G47190,AT4G17560 Poptr1|589910  
 AT1G24240,AT4G11630,AT5G11750  
 AT4G02560 Poptr1|572730,Poptr1|573446  
 AT1G27385  
 Poptr1|63134,Poptr1|554782  
 AT4G12970 Poptr1|553238  
 AT4G13550  
 Poptr1|354644  
 AT2G01755  
 Poptr1|656985  
 AT5G67540,AT3G49880 Poptr1|592536,Poptr1|558962  
 AT3G63290 Poptr1|551139  
 AT4G14210 Poptr1|553085,Poptr1|57279  
 AT1G72560 Poptr1|745795,Poptr1|343299  
 AT1G61580,AT1G43170 Poptr1|551306,Poptr1|694634,Poptr1|680820,Poptr1|583524  
 Poptr1|567813  
 AT1G73090 Poptr1|567812  
 AT3G62970 Poptr1|572743  
 AT5G25560 Poptr1|654056  
 AT5G18650 Poptr1|565361  
 Poptr1|578132  
 AT5G22920 Poptr1|702769,Poptr1|558319  
 AT2G40410,AT3G56170 Poptr1|55450,Poptr1|564092  
 AT1G10510 Poptr1|721160  
 Poptr1|567029,Poptr1|564218  
 Poptr1|562641,Poptr1|643714  
 AT1G69540  
 AT1G22130,AT1G77980,AT1G77950  
 Poptr1|578016  
 AT1G18750  
 AT2G03060  
 AT4G32930 Poptr1|695067  
 AT1G18480 Poptr1|672300  
 AT3G52155  
 Poptr1|582340,Poptr1|560050  
 AT5G02060  
 AT2G37200 Poptr1|589435,Poptr1|589436,Poptr1|576693  
 Poptr1|682638  
 AT1G49405 Poptr1|649477,Poptr1|712897  
 AT2G28370 Poptr1|59911,Poptr1|54812  
 AT3G50810,AT4G37235 Poptr1|696069  
 AT3G53850 Poptr1|560815  
 AT3G23200 Poptr1|55077  
 AT4G11940,AT4G11930,AT4G38070 Poptr1|71649  
 AT1G18680 Poptr1|728844  
 AT3G47490 Poptr1|558333  
 Poptr1|108015,Poptr1|104191,Poptr1|107639,Poptr1|353099,Poptr1|351266,Poptr1|351265,Poptr1|35051  
 4  
 AT5G09210,AT5G08550  
 AT3G28030 Poptr1|577489  
 AT1G19250,AT5G45180 Poptr1|102887,Poptr1|64898,Poptr1|589332  
 Poptr1|556997,Poptr1|73148,Poptr1|581814,Poptr1|583637  
 AT5G52910 Poptr1|100162  
 AT2G02120,AT2G02100,AT2G02130,AT1G61070,AT2G02140,AT2G31957,AT2G31953  
 AT2G02147  
 AT5G63660 Poptr1|671887,Poptr1|665236

AT1G75190 Poptr1|100877,Poptr1|349152  
AT5G61610  
AT3G27660,AT5G40420  
AT2G25890 Poptr1|668773,Poptr1|670493,Poptr1|653963  
AT5G51210,AT4G25140 Poptr1|640234,Poptr1|646862  
AT5G07550,AT5G07560,AT5G07520,AT5G07510,AT5G07600  
Poptr1|575219,Poptr1|570116  
AT1G48990,AT3G18570 Poptr1|569851  
AT3G01570 Poptr1|641631,Poptr1|701785  
AT3G48150 Poptr1|570037  
AT1G69260 Poptr1|566923,Poptr1|353938  
Poptr1|566924  
AT3G29575 Poptr1|556310  
AT3G02140  
AT1G13740  
Poptr1|582185,Poptr1|573533  
AT2G31035,AT2G31030  
AT4G22540,AT4G12460 Poptr1|704262,Poptr1|350072  
AT4G08180  
Poptr1|573613  
AT1G13170 Poptr1|354731,Poptr1|726179  
Poptr1|559189,Poptr1|684498  
AT1G77730 Poptr1|559190  
AT2G31020  
AT3G25990,AT1G13450 Poptr1|657418,Poptr1|687036  
Poptr1|73035,Poptr1|550886  
AT1G19970,AT1G75760  
AT4G38790,AT2G21190 Poptr1|556584,Poptr1|721816  
AT3G25160 Poptr1|349009  
Poptr1|685182  
AT2G21960  
AT5G44610  
AT4G20260 Poptr1|712130  
AT5G40270,AT5G40290 Poptr1|697127  
Poptr1|696308  
AT5G44420,AT2G26020,AT5G44430,AT2G26010,AT1G75830,AT1G55010,AT1G19610 Poptr1|550991  
AT1G37010,AT5G06680 Poptr1|576391,Poptr1|653474  
AT2G26200 Poptr1|577876,Poptr1|344608  
Poptr1|97893,Poptr1|568976  
AT4G27350  
AT5G54240 Poptr1|671830  
Poptr1|592571  
Poptr1|566898,Poptr1|696655  
AT5G26200 Poptr1|344601,Poptr1|577977  
AT1G72820  
AT5G15640 Poptr1|556386,Poptr1|704749  
AT4G30880  
Poptr1|639865,Poptr1|547856  
AT4G33550  
AT2G01730  
Poptr1|566435  
AT1G61010 Poptr1|577561,Poptr1|681397,Poptr1|577563  
Poptr1|577562,Poptr1|594672,Poptr1|103041,Poptr1|580706  
Poptr1|643300  
AT2G26310 Poptr1|344585,Poptr1|578011  
AT3G63170  
AT1G28320 Poptr1|580931,Poptr1|555773  
AT4G34570,AT2G16370  
AT2G21550 Poptr1|673535,Poptr1|694796  
Poptr1|673370,Poptr1|582017  
Poptr1|649387,Poptr1|648629  
AT2G46370 Poptr1|644556,Poptr1|664086  
AT5G13320,AT1G23160,AT1G48670,AT1G48660,AT5G51470  
AT2G47750 Poptr1|684289  
Poptr1|572786  
AT1G59500,AT4G37390,AT2G23170  
Poptr1|681930  
AT1G48690  
AT5G13360,AT5G13370,AT5G13380,AT5G13350  
AT4G03400 Poptr1|730503,Poptr1|670564  
Poptr1|571842  
AT1G28130 Poptr1|554671,Poptr1|63225  
AT2G14960 Poptr1|549965,Poptr1|686749,Poptr1|587044  
AT4G27260,AT5G54510 Poptr1|569040,Poptr1|571444  
Poptr1|671202,Poptr1|693494  
AT4G12360,AT1G62790  
AT1G73560,AT1G18280,AT1G73550 Poptr1|575031  
AT1G02630 Poptr1|736557,Poptr1|560596,Poptr1|729108,Poptr1|661768,Poptr1|669775  
AT2G20430,AT4G28556  
AT4G04900 Poptr1|568202,Poptr1|544858  
AT1G03982 Poptr1|559727,Poptr1|346818  
AT3G23380

Poptr1|354596,Poptr1|565783  
AT1G04450,AT2G33460  
AT5G62760 Poptr1|581349  
AT1G21500 Poptr1|704545  
Poptr1|586363,Poptr1|108987,Poptr1|745361,Poptr1|586379,Poptr1|674463  
AT4G31210  
Poptr1|103788  
AT3G22590 Poptr1|593408  
AT2G42180,AT3G57950,AT5G06790 Poptr1|576274,Poptr1|561267  
AT1G27850 Poptr1|354687  
Poptr1|646155,Poptr1|554592  
AT5G51230 Poptr1|597408,Poptr1|554593,Poptr1|683627  
Poptr1|646156  
AT2G35670  
AT4G16845  
AT4G16810  
Poptr1|553914  
AT5G27450 Poptr1|680106,Poptr1|742256,Poptr1|729638,Poptr1|575646  
AT3G13230 Poptr1|681885,Poptr1|60702  
AT1G29070 Poptr1|728214  
Poptr1|587123  
AT1G79660,AT1G16170  
Poptr1|639745,Poptr1|680643,Poptr1|579268,Poptr1|48472,Poptr1|555150,Poptr1|589164  
AT2G27350 Poptr1|679877,Poptr1|648978  
AT5G48170 Poptr1|573088  
Poptr1|687572  
Poptr1|568846,Poptr1|53058,Poptr1|579416,Poptr1|583065  
AT2G31090 Poptr1|574349  
AT1G16500,AT1G79160 Poptr1|53272,Poptr1|71845  
Poptr1|672774,Poptr1|101127,Poptr1|677496,Poptr1|588522,Poptr1|591392,Poptr1|107157,Poptr1|56928  
8  
AT1G73460,AT1G73450  
AT2G40120 Poptr1|696781,Poptr1|724460  
Poptr1|569399,Poptr1|580646  
AT3G17750  
AT1G79120 Poptr1|569174,Poptr1|586873  
AT4G28160,AT2G20870 Poptr1|682870  
AT1G60730,AT1G60690,AT1G60710,AT1G60680,AT1G10810  
Poptr1|552849,Poptr1|684202,Poptr1|553072,Poptr1|568243,Poptr1|572904  
Poptr1|566188,Poptr1|564885  
Poptr1|553071  
Poptr1|675423,Poptr1|742042,Poptr1|571028,Poptr1|595433  
Poptr1|583354  
Poptr1|587261  
AT4G29520 Poptr1|582950  
AT1G32230,AT2G35510 Poptr1|554061,Poptr1|702946  
Poptr1|108299,Poptr1|558968,Poptr1|551727  
AT1G70440,AT1G23550 Poptr1|352703,Poptr1|352700,Poptr1|561684,Poptr1|577932  
AT3G47720,AT5G62520 Poptr1|570092,Poptr1|575162  
AT1G68490  
Poptr1|566618  
AT3G02555,AT5G16110 Poptr1|648025,Poptr1|670909  
Poptr1|574899,Poptr1|355571  
Poptr1|593796  
AT1G13390  
AT5G19590 Poptr1|585413  
Poptr1|572677  
AT1G02816,AT4G02370 Poptr1|57201,Poptr1|692296,Poptr1|570772,Poptr1|581894  
AT1G02813,AT4G02360  
AT1G25500 Poptr1|564506  
Poptr1|576672,Poptr1|558261  
AT4G24250  
AT3G45290 Poptr1|583474  
AT1G42560,AT2G33670  
Poptr1|559981,Poptr1|346550  
Poptr1|589415  
Poptr1|562901,Poptr1|708957,Poptr1|580708,Poptr1|546445  
Poptr1|593823  
AT2G44110  
AT5G53760,AT1G26700 Poptr1|55969,Poptr1|689984  
Poptr1|596585,Poptr1|640221  
AT4G02600 Poptr1|730115  
AT1G11000Poptr1|99178  
AT2G17480 Poptr1|76039,Poptr1|694387  
Poptr1|73183,Poptr1|346553,Poptr1|562902  
Poptr1|596586,Poptr1|99942  
AT1G11310,AT1G61560,AT2G39200 Poptr1|686530,Poptr1|724952  
AT5G65970,AT2G17430  
Poptr1|585035,Poptr1|746292,Poptr1|594745,Poptr1|594744,Poptr1|53028  
AT3G25130 Poptr1|645457  
AT5G51680 Poptr1|575707  
AT5G65110Poptr1|694321,Poptr1|695895



AT3G06690,AT1G06290,AT1G06310 Poptr1|105302,Poptr1|690298,Poptr1|574369  
AT2G44930,AT2G28580,AT3G60470,AT1G65985,AT1G67150  
Poptr1|101353,Poptr1|594560,Poptr1|589077,Poptr1|585524,Poptr1|589080,Poptr1|594572,Poptr1|58907  
9,Poptr1|594575,Poptr1|679631,Poptr1|562204,Poptr1|591723  
AT2G36430 Poptr1|53431,Poptr1|346374  
Poptr1|594061  
Poptr1|696010  
Poptr1|554654,Poptr1|63245,Poptr1|554655  
Poptr1|594811  
Poptr1|589100,Poptr1|589734,Poptr1|594823  
Poptr1|594351,Poptr1|354032,Poptr1|594573  
Poptr1|594192,Poptr1|594772  
AT3G50140,AT3G50190,AT3G50130,AT3G50120,AT3G50170,AT3G50160,AT3G50150,AT3G50180  
Poptr1|569444,Poptr1|569445,Poptr1|593571,Poptr1|591727,Poptr1|591094,Poptr1|703031,Poptr1|35525  
1,Poptr1|355255,Poptr1|355263,Poptr1|355262,Poptr1|569528,Poptr1|581647,Poptr1|581650,Poptr1|588238,Poptr1|5  
88833,Poptr1|97601  
Poptr1|594006  
AT5G11290Poptr1|590449  
AT5G22560,Poptr1|594582,Poptr1|350761  
Poptr1|554940  
AT3G50200  
Poptr1|108924,Poptr1|594197  
Poptr1|106842,Poptr1|554941,Poptr1|554936,Poptr1|594776  
Poptr1|577009  
Poptr1|566822  
Poptr1|102945,Poptr1|561869  
Poptr1|591725  
Poptr1|102944  
Poptr1|661366,Poptr1|593570,Poptr1|106094,Poptr1|101542  
Poptr1|350720,Poptr1|350721,Poptr1|587215,Poptr1|549673,Poptr1|641781,Poptr1|571789,Poptr1|57179  
1,Poptr1|571788,Poptr1|595255,Poptr1|588591,Poptr1|595256,Poptr1|591463,Poptr1|571787,Poptr1|102615,Poptr1|7  
03318,Poptr1|580350  
AT5G22560,AT5G22550,AT5G22540,AT3G44700,AT3G44710,AT3G47200,AT3G47250,AT3G47210  
AT4G31980  
Poptr1|101545,Poptr1|350784,Poptr1|103493,Poptr1|350783,Poptr1|350766,Poptr1|104892,Poptr1|58964  
8,Poptr1|639891,Poptr1|677514,Poptr1|554938,Poptr1|647214,Poptr1|554925,Poptr1|350772,Poptr1|554929,Poptr1|1  
02551,Poptr1|350765,Poptr1|590455,Poptr1|583938,Poptr1|590447,Poptr1|350788,Poptr1|554954,Poptr1|573606,Pop  
ptr1|554930,Poptr1|588315,Poptr1|101841,Poptr1|62983,Poptr1|101845,Poptr1|594773,Poptr1|554935,Poptr1|55495  
8,Poptr1|583937,Poptr1|101549,Poptr1|343852,Poptr1|58549  
Poptr1|576203,Poptr1|576198,Poptr1|560423  
AT5G62490,AT1G69700  
AT2G42820  
AT1G74520 Poptr1|728631,Poptr1|690164  
Poptr1|575390,Poptr1|662181  
AT5G50720,AT4G24960  
AT4G36720 Poptr1|703291  
Poptr1|572913  
Poptr1|108336,Poptr1|545591  
Poptr1|556097,Poptr1|673112,Poptr1|641786,Poptr1|730118  
AT5G17310,AT3G03250  
Poptr1|592888,Poptr1|678880,Poptr1|648245,Poptr1|677974  
AT3G15660  
AT4G32580,AT4G04950 Poptr1|555811,Poptr1|580891  
Poptr1|712481  
Poptr1|675640  
AT3G54900  
AT2G38270 Poptr1|735883  
Poptr1|664586  
Poptr1|994777,Poptr1|568636  
Poptr1|349155  
AT5G53670  
AT2G19080 Poptr1|579053,Poptr1|560682,Poptr1|589629,Poptr1|584565  
AT5G51410 Poptr1|581265,Poptr1|590184,Poptr1|554179  
AT5G20120 Poptr1|582944  
AT3G49350,AT5G24390 Poptr1|666082,Poptr1|661607  
AT5G53570 Poptr1|640273,Poptr1|661606  
Poptr1|640275,Poptr1|646820  
AT5G41940  
AT3G59430 Poptr1|594516,Poptr1|562237,Poptr1|679575  
Poptr1|654267,Poptr1|654265  
AT1G28280 Poptr1|555787,Poptr1|97181  
AT2G33780  
AT1G80450  
AT5G08480 Poptr1|546602  
AT3G15300,AT5G53830 Poptr1|568889,Poptr1|579453  
AT5G01710 Poptr1|560959,Poptr1|577091  
Poptr1|574540  
AT5G27010,AT5G06350,AT4G04680 Poptr1|548769  
Poptr1|352138,Poptr1|568604  
AT5G25800 Poptr1|551372,Poptr1|72542  
Poptr1|587878,Poptr1|107853  
Poptr1|108816

AT3G22200 Poptr1|652454,Poptr1|734565  
Poptr1|107515  
AT1G68330 Poptr1|564544  
AT5G38320,AT1G67050 Poptr1|580808,Poptr1|555862  
Poptr1|555863,Poptr1|580809  
AT3G19870 Poptr1|564189  
Poptr1|694180  
AT3G53070  
AT4G35010,AT2G16730,AT4G38590 Poptr1|556638,Poptr1|557081  
AT4G36360 Poptr1|719632  
AT2G32810 Poptr1|689945  
AT3G53080  
Poptr1|577822,Poptr1|589318  
Poptr1|548327  
AT5G56870,AT4G26140,AT3G52840 Poptr1|352016  
Poptr1|555514  
Poptr1|568285  
AT5G63800 Poptr1|694292  
AT1G31740 Poptr1|48511  
AT3G13750 Poptr1|703914,Poptr1|59604  
AT1G77410 Poptr1|72484,Poptr1|342404  
AT5G20710  
AT3G53050  
AT5G63810 Poptr1|106734,Poptr1|53156  
AT2G28470 Poptr1|54820  
Poptr1|592311  
AT2G04060 Poptr1|592773  
AT1G45130 Poptr1|715300  
AT5G34940 Poptr1|583655,Poptr1|578860  
Poptr1|566955  
AT5G07830,AT5G61250 Poptr1|57500  
Poptr1|352956  
AT5G18680,AT3G06380  
AT1G61940,AT2G47900 Poptr1|697836,Poptr1|354864  
AT1G43640,AT1G76900,AT1G25280  
Poptr1|551319,Poptr1|52033  
AT1G47270 Poptr1|651944,Poptr1|346809  
AT1G53320 Poptr1|55925,Poptr1|704974  
AT2G18280 Poptr1|679218,Poptr1|682343  
Poptr1|673808,Poptr1|689142  
AT4G30330,AT2G18740  
Poptr1|703037  
AT5G47030 Poptr1|678850,Poptr1|704014  
AT2G38560 Poptr1|560996  
AT5G38650,AT1G67250 Poptr1|654101,Poptr1|704148  
AT1G62920  
AT2G32380,AT1G05210,AT1G05220 Poptr1|557240  
Poptr1|580989  
AT3G61320,AT2G45870 Poptr1|572242  
AT2G17710 Poptr1|356829,Poptr1|593786  
AT4G05210,AT4G21220 Poptr1|545052  
AT1G28327 Poptr1|562151  
AT5G44280 Poptr1|654383,Poptr1|594655  
AT2G20390 Poptr1|645565,Poptr1|573375  
Poptr1|579388  
Poptr1|655760,Poptr1|725409  
AT3G52220  
AT3G15460,AT1G52930 Poptr1|568932,Poptr1|579496  
AT1G09340 Poptr1|581662,Poptr1|687905  
AT4G00585  
Poptr1|663932,Poptr1|552134  
AT3G09150 Poptr1|723000,Poptr1|549046  
Poptr1|651547,Poptr1|551330  
AT2G01090  
AT1G15120 Poptr1|710786,Poptr1|651548  
AT1G18610 Poptr1|661804,Poptr1|671355  
AT1G74150  
AT1G77670 Poptr1|681282,Poptr1|591634,Poptr1|51965,Poptr1|748535,Poptr1|551478  
Poptr1|572646  
AT3G59520 Poptr1|679599,Poptr1|654451  
AT5G39940 Poptr1|556240  
AT4G36440 Poptr1|696124,Poptr1|76353  
AT5G51720 Poptr1|662427,Poptr1|701148  
AT1G68370 Poptr1|723721,Poptr1|564551  
AT1G59980  
AT1G24120 Poptr1|721140,Poptr1|657565  
AT1G02830  
AT3G05560,AT5G27770  
Poptr1|587158,Poptr1|662685,Poptr1|704404,Poptr1|552449,Poptr1|664432,Poptr1|682538  
AT1G56260 Poptr1|581919  
Poptr1|561977,Poptr1|64227  
AT5G03990,AT3G51940 Poptr1|560451,Poptr1|587827

Poptr1|652116,Poptr1|710650  
 AT1G20110Poptr1|709921  
 AT4G34670,AT3G04840 Poptr1|680295  
 Poptr1|658489,Poptr1|719913  
 Poptr1|701437,Poptr1|653399  
 AT3G11780,AT5G06480  
 AT2G16005,AT3G44100  
 Poptr1|552631  
 AT1G11260Poptr1|568307,Poptr1|694037  
 AT3G19930  
 AT4G36670  
 AT4G16480,AT2G35740 Poptr1|351223,Poptr1|667113,Poptr1|560187  
 AT5G59250 Poptr1|706102  
 AT3G19940,AT1G50310,AT5G23270  
 Poptr1|562794,Poptr1|562795,Poptr1|75929,Poptr1|71789,Poptr1|75938  
 AT3G05150  
 AT5G16150  
 Poptr1|60953  
 Poptr1|570897,Poptr1|595569,Poptr1|742204,Poptr1|699781  
 AT3G05155 Poptr1|592645  
 AT3G20460  
 AT2G43330  
 AT1G34580 Poptr1|347376,Poptr1|342477  
 AT1G05030 Poptr1|591666,Poptr1|591661  
 AT1G75220,AT1G19450 Poptr1|343223  
 AT1G67300 Poptr1|58658  
 AT3G03090,AT5G17010 Poptr1|738679  
 Poptr1|670921  
 AT1G07340 Poptr1|54710,Poptr1|549094  
 AT5G18840  
 AT1G77210 Poptr1|557901,Poptr1|48957  
 AT5G26340 Poptr1|726589,Poptr1|686252  
 Poptr1|587991  
 AT2G18480 Poptr1|53365  
 AT1G54720,AT1G08900,AT1G08890  
 AT1G30220 Poptr1|545823  
 Poptr1|743757,Poptr1|546475  
 Poptr1|596839  
 Poptr1|546385  
 AT2G20780 Poptr1|56857  
 Poptr1|556209,Poptr1|546575  
 Poptr1|76305  
 Poptr1|343603,Poptr1|548516  
 AT5G61520 Poptr1|596837,Poptr1|58210  
 AT4G02050 Poptr1|702268,Poptr1|716789  
 AT1G79820 Poptr1|705740  
 AT4G21480  
 AT3G18830 Poptr1|581977,Poptr1|556444,Poptr1|106628,Poptr1|557280  
 AT1G08930,AT1G08920,AT3G05400,AT5G27360,AT5G27350,AT3G05160,AT3G05165  
 Poptr1|680200,Poptr1|680198,Poptr1|679556,Poptr1|103428,Poptr1|589816,Poptr1|685931,Poptr1|67023  
 5,Poptr1|677966  
 AT1G54730 Poptr1|595543  
 AT2G16130,AT2G16120  
 AT4G04760,AT4G04750  
 AT2G48020 Poptr1|731956,Poptr1|692220  
 AT3G05960,AT5G26250 Poptr1|354450,Poptr1|345395  
 Poptr1|579672,Poptr1|657137  
 Poptr1|347825,Poptr1|580034  
 Poptr1|55142,Poptr1|354451  
 Poptr1|552932,Poptr1|572782,Poptr1|597703,Poptr1|595570,Poptr1|596838,Poptr1|592191,Poptr1|57089  
 8,Poptr1|679557  
 AT5G63300  
 Poptr1|570201  
 AT3G27160 Poptr1|549690  
 AT2G41945 Poptr1|653464  
 AT2G25670,AT4G32610 Poptr1|561816,Poptr1|578136  
 Poptr1|579799,Poptr1|580547,Poptr1|580433,Poptr1|108613,Poptr1|586095  
 Poptr1|109013  
 Poptr1|104852,Poptr1|582812,Poptr1|596234,Poptr1|587237,Poptr1|582515  
 AT3G45300 Poptr1|558263  
 AT1G47330 Poptr1|665125  
 AT5G52790  
 Poptr1|665126  
 AT4G14230,AT4G14240 Poptr1|354928,Poptr1|725748  
 AT1G03270  
 Poptr1|553345  
 AT2G14520,AT4G33700 Poptr1|722481,Poptr1|707481  
 Poptr1|648826  
 AT4G38490  
 AT5G27290 Poptr1|573207,Poptr1|594138,Poptr1|570911  
 AT1G54680 Poptr1|595534  
 AT2G35450 Poptr1|712455

AT3G56430,AT2G40800 Poptr1|704218  
AT3G19900 Poptr1|659312  
Poptr1|63387  
Poptr1|577995  
Poptr1|577991  
Poptr1|565338,Poptr1|61658,Poptr1|109220  
Poptr1|595865  
Poptr1|64146,Poptr1|589818,Poptr1|99029  
AT3G30730  
AT4G03680  
AT3G42320 Poptr1|583069  
AT1G64410,AT1G52960,AT3G43350,AT3G42340,AT4G03690,AT3G30560,AT3G13250,AT3G42100,AT1G35940,AT5  
G32070,AT3G31980,AT5G37110,AT2G05080,AT4G03916  
Poptr1|646195  
AT3G51700,AT3G51690  
Poptr1|579273,Poptr1|597640  
Poptr1|568240,Poptr1|568241,Poptr1|571336  
AT5G34540 Poptr1|98394  
AT4G07800  
Poptr1|55755  
Poptr1|583518  
Poptr1|571335,Poptr1|63924,Poptr1|102676  
Poptr1|64553  
AT5G28780  
AT3G43330 Poptr1|565339,Poptr1|76065,Poptr1|583517,Poptr1|584031  
Poptr1|99203  
AT3G30420,AT1G54430  
Poptr1|587599  
Poptr1|568242,Poptr1|568239  
AT5G11810 Poptr1|668808,Poptr1|352689  
AT3G04360 Poptr1|573737,Poptr1|571115  
AT2G33320,AT1G04540 Poptr1|565827,Poptr1|354623,Poptr1|591019  
Poptr1|581042  
AT4G01200 Poptr1|348037  
AT2G13350  
AT1G20810 Poptr1|559982  
AT1G01610,AT4G00400 Poptr1|700225  
Poptr1|344429  
AT1G06520 Poptr1|72686  
AT2G38110 Poptr1|735760,Poptr1|560888  
AT5G06090,AT3G11430 Poptr1|353574  
AT3G11325  
AT4G01950,AT1G02390 Poptr1|552558  
AT5G54540 Poptr1|569043,Poptr1|571447  
AT1G19200,AT1G74940,AT5G20700 Poptr1|584574  
Poptr1|101785  
Poptr1|109211,Poptr1|592553  
Poptr1|596272  
Poptr1|566828  
AT2G30090 Poptr1|54606,Poptr1|64675  
AT2G23060,AT4G37580 Poptr1|51874,Poptr1|711834  
AT5G67430 Poptr1|554886,Poptr1|100432  
AT1G30960 Poptr1|589836  
Poptr1|571940,Poptr1|574452  
AT1G70400,AT1G60170  
Poptr1|552316,Poptr1|731413  
AT2G28490 Poptr1|64492,Poptr1|597481,Poptr1|722895  
Poptr1|577349  
AT2G47830 Poptr1|700735  
Poptr1|696276  
AT4G03020 Poptr1|572777  
Poptr1|562460  
AT1G19025  
AT4G32560 Poptr1|654081  
AT3G16830 Poptr1|581945,Poptr1|561934  
AT1G15750,AT1G80490 Poptr1|742882,Poptr1|740856  
AT3G15880 Poptr1|689182,Poptr1|695514  
AT5G27030 Poptr1|56547,Poptr1|744575  
Poptr1|596940  
AT2G25420 Poptr1|716902,Poptr1|737271  
Poptr1|58578,Poptr1|561933  
Poptr1|562292,Poptr1|581827  
Poptr1|107109,Poptr1|692052,Poptr1|590241  
Poptr1|579109  
Poptr1|687416,Poptr1|686549

AT5G03760 Poptr1|589559  
Poptr1|595689,Poptr1|665060  
Poptr1|563157  
AT3G07330 Poptr1|105934  
AT5G16190,AT1G24070,AT4G13410,AT4G16590,AT3G56000,AT1G23480,AT2G35650  
AT3G28180  
AT5G22740 Poptr1|594843,Poptr1|556940  
AT4G07960 Poptr1|694461,Poptr1|692569  
Poptr1|573344  
AT2G24630,AT4G31590 Poptr1|745288,Poptr1|353078,Poptr1|578365,Poptr1|579346  
AT1G78850,AT1G78860  
Poptr1|568812,Poptr1|568813,Poptr1|728310,Poptr1|568809,Poptr1|55927,Poptr1|585776,Poptr1|98348,  
Poptr1|565510  
Poptr1|590948,Poptr1|102790,Poptr1|106032  
AT1G78820,AT1G78830  
Poptr1|551485  
Poptr1|585517,Poptr1|582179,Poptr1|591417,Poptr1|578212  
Poptr1|585975,Poptr1|596974  
Poptr1|347628  
AT4G34150 Poptr1|649601,Poptr1|691738  
AT1G60490 Poptr1|345919  
AT1G77550 Poptr1|59108  
AT4G02950,AT4G03360,AT4G03370,AT4G03350,AT4G02970,AT4G05270,AT4G05310,AT4G05240,AT4G05250,AT4  
G05260,AT4G05230 Poptr1|713574  
AT2G35500 Poptr1|684948  
AT2G17972 Poptr1|593855  
AT1G09450 Poptr1|570666,Poptr1|581606  
AT3G47070 Poptr1|650159,Poptr1|641088  
AT1G22750 Poptr1|559438,Poptr1|710725  
AT5G14850 Poptr1|595983,Poptr1|561395,Poptr1|737878  
AT3G05870 Poptr1|594461  
Poptr1|562301  
AT5G26640  
AT1G43245 Poptr1|559391  
AT2G31260 Poptr1|559679,Poptr1|346859  
AT5G59180 Poptr1|642386  
AT3G05100 Poptr1|570959,Poptr1|595493  
Poptr1|577220  
AT2G14110,Poptr1|668318,Poptr1|701737  
Poptr1|664885  
AT4G13500,AT2G05310  
AT2G21470 Poptr1|713061,Poptr1|648652  
AT3G14420,AT3G14415 Poptr1|568833,Poptr1|583055,Poptr1|555599  
AT4G18360  
AT3G14150,AT3G14130 Poptr1|693667,Poptr1|693666,Poptr1|349653  
Poptr1|587717  
AT4G12760 Poptr1|573160,Poptr1|573157  
AT4G17486,AT5G47310 Poptr1|589895,Poptr1|712381  
AT1G47740 Poptr1|692502,Poptr1|689557  
AT1G80690 Poptr1|708603,Poptr1|647151  
AT5G25170 Poptr1|561964,Poptr1|669130  
AT2G25190  
Poptr1|653338,Poptr1|745216  
Poptr1|556438,Poptr1|686717  
Poptr1|572797  
AT1G03360 Poptr1|555071  
AT4G11960,AT4G22890 Poptr1|48775,Poptr1|646529  
Poptr1|591170,Poptr1|72490,Poptr1|579608,Poptr1|108327,Poptr1|593743,Poptr1|107777,Poptr1|589242,  
Poptr1|100530,Poptr1|577863,Poptr1|347572  
Poptr1|582057  
Poptr1|595799,Poptr1|106908,Poptr1|587681  
Poptr1|106379,Poptr1|105627,Poptr1|104103,Poptr1|574332,Poptr1|563108,Poptr1|102223,Poptr1|75778  
AT4G13320  
Poptr1|107365  
Poptr1|596923,Poptr1|587868  
Poptr1|106178,Poptr1|593744,Poptr1|586473,Poptr1|577116,Poptr1|354758,Poptr1|581745  
AT5G19840 Poptr1|551124,Poptr1|694722  
Poptr1|668969  
AT2G25660 Poptr1|668970  
Poptr1|654064  
Poptr1|352848,Poptr1|578137,Poptr1|578138  
Poptr1|668971  
AT4G10050 Poptr1|689635,Poptr1|574176  
AT4G04040  
Poptr1|568150,Poptr1|568134  
Poptr1|568135,Poptr1|560273  
AT1G20950,AT1G76550 Poptr1|550714,Poptr1|73215  
AT4G08876 Poptr1|679008  
AT1G12000 Poptr1|679007,Poptr1|698837,Poptr1|704902  
AT3G20330 Poptr1|550113  
AT1G70150 Poptr1|355010  
AT5G20090 Poptr1|666624,Poptr1|699382

AT3G03100 Poptr1|690601  
 AT1G23360 Poptr1|345542  
 Poptr1|658309  
 AT4G40050 Poptr1|53164,Poptr1|71605  
 AT3G03570 Poptr1|56759  
 AT1G78570 Poptr1|584885  
 AT1G63000  
 Poptr1|578370,Poptr1|583125  
 Poptr1|583814,Poptr1|104381  
 Poptr1|554291,Poptr1|548533  
 AT1G53500,AT3G14790  
 AT3G16150 Poptr1|347625,Poptr1|689591  
 AT5G08100 Poptr1|705076  
 AT4G25030 Poptr1|724933,Poptr1|696937  
 Poptr1|592976,Poptr1|356737  
 AT5G45410  
 Poptr1|592975  
 AT1G55280 Poptr1|351025  
 Poptr1|562960  
 AT5G67100  
 AT5G28646,AT3G04630,AT1G54460  
 Poptr1|705429,Poptr1|595399  
 AT3G23090 Poptr1|564928,Poptr1|566133  
 AT3G62980,AT4G03190  
 Poptr1|568304,Poptr1|544999  
 AT1G12820,AT3G26810 Poptr1|549767,Poptr1|703890  
 Poptr1|564730  
 AT5G49980,AT4G24390 Poptr1|651225,Poptr1|551628  
 AT2G39940 Poptr1|659564,Poptr1|686456  
 AT2G24490 Poptr1|654298,Poptr1|745313,Poptr1|583754,Poptr1|583753  
 AT3G02920 Poptr1|743384,Poptr1|578589  
 AT3G17030 Poptr1|698314  
 AT1G78660,AT1G78680,AT1G78670 Poptr1|585500,Poptr1|747710,Poptr1|568783,Poptr1|568782  
 Poptr1|560589  
 AT5G53870 Poptr1|703941,Poptr1|568885  
 AT5G16300 Poptr1|659395,Poptr1|686419  
 Poptr1|724291  
 AT3G57520 Poptr1|560522,Poptr1|734993  
 AT5G40390 Poptr1|594470,Poptr1|562286,Poptr1|595025  
 AT4G01265  
 Poptr1|584800,Poptr1|584803,Poptr1|584799  
 AT5G20250 Poptr1|595580,Poptr1|589062,Poptr1|677982,Poptr1|344169  
 Poptr1|585076,Poptr1|571927  
 Poptr1|567810  
 Poptr1|744793  
 AT1G55740 Poptr1|582552  
 AT4G01970 Poptr1|342927,Poptr1|572594  
 Poptr1|575259  
 Poptr1|573167  
 AT4G08330 Poptr1|694563,Poptr1|643622  
 Poptr1|558482  
 AT1G67740 Poptr1|47246,Poptr1|686199  
 Poptr1|584022,Poptr1|354821  
 AT3G20475 Poptr1|591251  
 Poptr1|664360,Poptr1|568545  
 Poptr1|108234  
 AT4G02070 Poptr1|572625  
 AT4G25540 Poptr1|575808  
 AT3G24495 Poptr1|584023  
 Poptr1|103062  
 Poptr1|597213  
 Poptr1|568546  
 AT1G60850,AT1G60620  
 Poptr1|550226  
 AT3G11120 Poptr1|649832  
 AT1G56045,AT2G40205,AT3G08520,AT3G56020 Poptr1|564058  
 Poptr1|673089  
 AT3G02260 Poptr1|673088  
 Poptr1|555837  
 AT1G67140 Poptr1|545327  
 Poptr1|555834  
 Poptr1|555836  
 Poptr1|583442  
 Poptr1|581518,Poptr1|722207  
 AT4G34030  
 AT5G56180 Poptr1|49518,Poptr1|708207  
 AT1G73910 Poptr1|565112,Poptr1|705510  
 AT1G18450 Poptr1|729159,Poptr1|689890  
 Poptr1|565113  
 Poptr1|687358,Poptr1|719800,Poptr1|561252,Poptr1|576255  
 AT3G27000 Poptr1|549729  
 AT5G09810 Poptr1|641963,Poptr1|746505

Poptr1|59117  
AT1G13180 Poptr1|55030  
Poptr1|56056,Poptr1|707987  
Poptr1|550496  
AT1G49240,AT3G18780  
AT2G37620,AT3G53750,AT5G59370,AT3G46520  
AT2G42090  
AT3G12110  
AT3G60830 Poptr1|706398,Poptr1|649984  
AT2G42170,AT2G42100  
AT3G33520 Poptr1|736541  
AT5G45113,AT4G19650 Poptr1|104954,Poptr1|586736,Poptr1|105352,Poptr1|575564  
AT3G60400 Poptr1|591800  
AT5G06810 Poptr1|592399,Poptr1|576279,Poptr1|576280  
AT1G75010 Poptr1|658652,Poptr1|696473  
AT2G32200,AT2G32210,AT2G32190,AT1G05340 Poptr1|652461,Poptr1|667174  
AT3G22231  
AT1G56060  
AT4G18300,AT2G34970,AT3G02270 Poptr1|689844  
AT1G49430 Poptr1|686725  
AT3G05970 Poptr1|55144  
Poptr1|556419  
AT2G47240 Poptr1|348377  
AT1G77590 Poptr1|643628,Poptr1|716651  
AT2G04350 Poptr1|596326,Poptr1|596324,Poptr1|581720,Poptr1|573121  
AT4G23850,AT4G11030,AT1G64400 Poptr1|709180,Poptr1|684846  
AT5G27600 Poptr1|570831  
AT4G00600,AT4G00620  
AT3G12290  
Poptr1|577253  
Poptr1|572220,Poptr1|692405  
AT2G38660 Poptr1|589586  
Poptr1|588086,Poptr1|590306  
Poptr1|582432,Poptr1|580211,Poptr1|584421,Poptr1|582122  
AT3G56510 Poptr1|706840  
AT5G38610 Poptr1|580130  
AT5G46970,AT5G46930,AT5G46940,AT5G46950,AT5G46960,AT5G46980,AT1G54620,AT5G46990  
Poptr1|580131  
AT4G06634 Poptr1|689893  
AT5G61450 Poptr1|554171,Poptr1|740010  
Poptr1|680840,Poptr1|661842  
AT2G33040  
AT2G37550,AT3G53710 Poptr1|576748,Poptr1|685752  
Poptr1|577311  
AT1G09730 Poptr1|72208,Poptr1|551658  
AT4G33620  
AT1G10570,AT1G60220  
Poptr1|562372,Poptr1|577310  
AT5G43070,AT1G47200,AT5G27940 Poptr1|644071,Poptr1|740523  
AT2G22730,AT5G65687  
AT5G64500 Poptr1|691781,Poptr1|557584  
AT5G19650 Poptr1|584009  
AT5G22240  
Poptr1|574654,Poptr1|556824  
AT3G46430,AT5G59613 Poptr1|659708,Poptr1|720318  
AT5G46850 Poptr1|590044,Poptr1|693577  
AT1G18640 Poptr1|569934  
Poptr1|348361  
AT1G64680 Poptr1|691037  
AT4G01995  
Poptr1|710729  
AT1G03055  
Poptr1|554567  
Poptr1|344683,Poptr1|578112  
AT3G24570 Poptr1|58652  
AT2G01690 Poptr1|55199,Poptr1|354298  
AT4G10330 Poptr1|591477,Poptr1|704212  
AT1G08640 Poptr1|571092,Poptr1|738223  
AT5G67170 Poptr1|51851  
AT5G52270 Poptr1|570458  
AT1G11890,Poptr1|553800,Poptr1|704797  
AT2G34620 Poptr1|55807  
AT3G18870 Poptr1|546021  
AT2G36000 Poptr1|576526,Poptr1|585638,Poptr1|653678  
AT2G03050 Poptr1|567030  
Poptr1|353854  
Poptr1|60141  
Poptr1|666678,Poptr1|356061  
AT5G50460,AT4G24920  
AT3G48570  
AT4G34140 Poptr1|348330  
AT2G02410 Poptr1|553563

AT4G38240 Poptr1|679961,Poptr1|54248  
Poptr1|679960  
AT1G79260 Poptr1|659382  
AT5G58130 Poptr1|560716,Poptr1|584525  
AT1G52730,AT3G15610 Poptr1|102669,Poptr1|693723,Poptr1|709584  
AT1G15470  
AT1G21440,AT1G77060 Poptr1|551374  
Poptr1|596296  
AT2G43180 Poptr1|710330  
Poptr1|573588  
Poptr1|595163,Poptr1|596184,Poptr1|573577,Poptr1|580061  
AT4G15093 Poptr1|590946,Poptr1|573569,Poptr1|556295,Poptr1|694109  
AT3G08860  
Poptr1|588997  
Poptr1|589730  
AT2G38400  
Poptr1|560972,Poptr1|701667  
AT4G39660 Poptr1|558595,Poptr1|562661  
AT5G19480,AT5G12230 Poptr1|573172,Poptr1|686605  
AT2G29700 Poptr1|549078,Poptr1|650148  
AT5G05710 Poptr1|353658  
Poptr1|575370  
Poptr1|356066  
Poptr1|579404  
AT4G24930  
AT1G74060,AT1G74050,AT1G18540 Poptr1|641408,Poptr1|682505  
AT5G02470  
AT5G03415 Poptr1|735523,Poptr1|739513  
Poptr1|670184  
AT5G64180 Poptr1|574667,Poptr1|732770,Poptr1|661585  
Poptr1|582742,Poptr1|747308,Poptr1|595662  
AT3G02640,AT5G16250 Poptr1|596377,Poptr1|656346,Poptr1|687292  
AT5G36800,AT5G36710  
AT3G09800,AT4G08520 Poptr1|683246  
AT1G60970 Poptr1|746755  
Poptr1|575800,Poptr1|356260  
AT4G00730 Poptr1|552123  
AT1G17920,AT1G73360 Poptr1|687671,Poptr1|97015  
AT1G79840 Poptr1|64014,Poptr1|685013  
AT4G04890,AT4G21750 Poptr1|568199,Poptr1|546357  
Poptr1|571504  
AT4G17710,AT5G46880 Poptr1|356671,Poptr1|554054  
AT4G25530  
AT2G32370  
AT5G52170  
AT3G61150  
AT1G34650,AT5G17320,AT3G03260 Poptr1|592887,Poptr1|546547  
AT4G26920,AT5G07260  
AT1G05230 Poptr1|700555,Poptr1|684208  
AT1G21720,AT1G77440 Poptr1|710740,Poptr1|559264  
AT2G01120Poptr1|566544  
Poptr1|354217  
AT1G27760 Poptr1|342575,Poptr1|56949  
AT3G50340,AT5G67020 Poptr1|558867,Poptr1|76110  
AT2G22790 Poptr1|76462  
AT1G10520 Poptr1|55162  
AT5G19910 Poptr1|575508,Poptr1|588177  
AT1G09415 Poptr1|97589,Poptr1|671515,Poptr1|581629  
AT4G37440 Poptr1|587061,Poptr1|72071  
Poptr1|581483  
AT5G19260,AT3G06020 Poptr1|566284,Poptr1|657124  
AT1G03170,AT4G02810 Poptr1|551183,Poptr1|559547  
AT3G06240  
AT4G22390,AT4G12560 Poptr1|575936,Poptr1|685870,Poptr1|560283  
Poptr1|563457,Poptr1|353136,Poptr1|101323  
Poptr1|583700,Poptr1|597059  
Poptr1|547750,Poptr1|560163,Poptr1|560159  
AT3G23880 Poptr1|565298  
Poptr1|567795,Poptr1|351184  
AT3G04680 Poptr1|736229  
AT5G39920,AT5G39930  
AT5G61540  
Poptr1|730562  
Poptr1|714945,Poptr1|681990  
AT3G07590,AT4G02840  
AT5G54400,AT3G15530 Poptr1|579520  
AT2G25830 Poptr1|561748  
AT2G31660 Poptr1|684204,Poptr1|732174  
AT3G59020  
AT1G20340,AT1G76100 Poptr1|682018,Poptr1|652151  
Poptr1|586027,Poptr1|583924  
AT3G46940



Poptr1|691990  
Poptr1|582395,Poptr1|573268  
Poptr1|573265,Poptr1|665046,Poptr1|588106  
AT5G62170 Poptr1|356320,Poptr1|575739  
AT4G25430,AT5G51850  
AT2G11270  
AT3G60100,AT2G44350 Poptr1|650343,Poptr1|690348  
AT3G60250,AT2G44680 Poptr1|684377,Poptr1|677648  
AT5G47080,AT4G17640 Poptr1|670468  
AT1G77140 Poptr1|559337,Poptr1|347156  
Poptr1|593333  
Poptr1|590767  
Poptr1|574784,Poptr1|574778,Poptr1|104351  
Poptr1|586711  
AT5G53450 Poptr1|574781  
AT4G05520  
AT3G20290 Poptr1|106314,Poptr1|691790  
Poptr1|584742,Poptr1|568172  
AT1G69610 Poptr1|99397  
AT5G39785 Poptr1|668564,Poptr1|61083  
AT5G47740  
AT3G61410 Poptr1|662033  
Poptr1|593378  
AT3G54610 Poptr1|692868,Poptr1|559629  
AT1G68000,AT4G38570 Poptr1|713351,Poptr1|649209,Poptr1|579790  
Poptr1|575204  
AT5G63080 Poptr1|575205  
AT3G63060  
AT5G39360 Poptr1|556349  
AT5G15440  
AT4G15140 Poptr1|695674  
AT5G22110Poptr1|569402  
AT3G61590 Poptr1|572337,Poptr1|342785  
Poptr1|555860,Poptr1|678987,Poptr1|697420  
AT5G61220  
AT1G70160 Poptr1|686149  
AT4G27020,AT5G54870 Poptr1|569120,Poptr1|688054  
AT4G14455 Poptr1|564938,Poptr1|566117  
AT3G58170 Poptr1|643179,Poptr1|651871  
AT1G31660 Poptr1|98376,Poptr1|660883  
AT1G26090  
Poptr1|354120,Poptr1|566682  
Poptr1|551243,Poptr1|559482  
AT5G55630 Poptr1|353117,Poptr1|684036,Poptr1|353118  
AT1G02510  
AT5G46360,AT5G46370,AT4G18160 Poptr1|568458,Poptr1|586969  
AT4G01840 Poptr1|572537,Poptr1|348427  
AT1G04530 Poptr1|573373,Poptr1|658073,Poptr1|593964,Poptr1|553304  
Poptr1|674183  
Poptr1|61589,Poptr1|61553  
Poptr1|100632,Poptr1|670136,Poptr1|573814  
AT1G09995,AT1G79890 Poptr1|48880  
AT3G07060 Poptr1|553151  
AT1G49590 Poptr1|557351  
AT1G64050 Poptr1|646677,Poptr1|548410  
AT4G18380,AT5G46170,AT1G30200 Poptr1|568418,Poptr1|555594  
AT1G78100,AT1G22220 Poptr1|551561,Poptr1|51932  
Poptr1|650118  
AT4G37200 Poptr1|696061  
AT2G39280,AT3G55020 Poptr1|344931,Poptr1|724864  
AT2G37290  
AT1G65720 Poptr1|592848,Poptr1|556060  
AT4G30993 Poptr1|653546  
Poptr1|352301  
AT3G16190 Poptr1|675257,Poptr1|645969  
Poptr1|577016  
AT1G80930  
AT1G52325  
AT2G01110  
Poptr1|566543  
AT4G21060 Poptr1|351193,Poptr1|57857  
AT1G27120 Poptr1|687067  
AT1G74800,AT5G62620 Poptr1|570013,Poptr1|688472  
AT3G06440  
Poptr1|723985  
Poptr1|723984  
AT1G26810 Poptr1|596591,Poptr1|567039,Poptr1|353845  
AT3G23710 Poptr1|553094  
AT4G33350 Poptr1|703112,Poptr1|644131  
AT4G18810 Poptr1|693986  
AT5G53000 Poptr1|732860,Poptr1|569566  
AT2G30960,AT1G06420 Poptr1|700122

AT1G73790,AT4G09550  
Poptr1|652558,Poptr1|576147  
AT3G60520 Poptr1|703018,Poptr1|692453  
Poptr1|559028  
AT1G02070  
AT2G35020,AT1G31070 Poptr1|712364,Poptr1|702842  
Poptr1|565313  
Poptr1|577347,Poptr1|718539  
AT3G23570,AT3G23600 Poptr1|696260  
AT4G01500,AT1G01030  
AT1G13260,AT3G25730  
AT1G51120,AT1G50680 Poptr1|555275  
Poptr1|352315,Poptr1|578763  
AT3G11580,AT5G06250,AT2G36080 Poptr1|576548,Poptr1|653695  
AT1G25560,AT1G68840 Poptr1|696583,Poptr1|566667  
AT3G61970,AT2G46870 Poptr1|569247,Poptr1|65803,Poptr1|572480,Poptr1|342858  
AT3G21570 Poptr1|697847,Poptr1|696272  
AT4G32020,AT2G25250  
AT4G02040 Poptr1|561953  
AT1G64980 Poptr1|665532,Poptr1|568882  
AT2G16070 Poptr1|648560,Poptr1|557302  
Poptr1|728063,Poptr1|677266  
AT3G44190,AT5G22140 Poptr1|105986,Poptr1|64186  
AT1G06360,AT1G06350,AT1G06120,AT1G06090,AT1G06100,AT2G31360,AT1G06080  
AT3G15850 Poptr1|579809,Poptr1|569271,Poptr1|661258  
AT3G15870  
AT4G16444 Poptr1|650987  
AT1G31190Poptr1|575608,Poptr1|575607,Poptr1|575605,Poptr1|586756  
Poptr1|107591  
AT3G02870 Poptr1|716898  
Poptr1|586943  
Poptr1|579083  
Poptr1|722546  
AT2G14170 Poptr1|64713  
AT1G54100 Poptr1|693755,Poptr1|745823  
Poptr1|549460,Poptr1|641543  
Poptr1|675617,Poptr1|108769  
Poptr1|353796  
AT1G79440 Poptr1|724241  
AT3G48000 Poptr1|575137,Poptr1|661983  
AT3G66658 Poptr1|696628  
Poptr1|72122  
AT1G74920 Poptr1|661953,Poptr1|700900  
Poptr1|566823  
Poptr1|586766,Poptr1|578437  
Poptr1|587173  
AT3G24503 Poptr1|58645  
AT3G48170  
Poptr1|581343  
AT1G23800 Poptr1|684248  
AT2G42975 Poptr1|651689,Poptr1|347036  
AT4G13600 Poptr1|65087  
AT3G61810  
AT4G29360  
AT1G78520 Poptr1|588268,Poptr1|642416  
Poptr1|582362,Poptr1|584415,Poptr1|106607,Poptr1|672051,Poptr1|573274,Poptr1|98033,Poptr1|679329,  
Poptr1|573273,Poptr1|582363,Poptr1|100870,Poptr1|573279,Poptr1|573259,Poptr1|582360,Poptr1|588107,Poptr1|58  
2357,Poptr1|592985,Poptr1|98038,Poptr1|588097,Poptr1|98060,Poptr1|553352,Poptr1|672050,Poptr1|98064,Poptr1|5  
73278,Poptr1|573260  
AT5G24318 Poptr1|574718,Poptr1|569580  
AT1G30080 Poptr1|556266,Poptr1|586125  
Poptr1|560133  
Poptr1|64729  
Poptr1|596580,Poptr1|575901  
AT3G07320 Poptr1|586388,Poptr1|553217  
AT2G42930  
AT5G53600,AT5G53610,AT5G63230,AT4G09090,AT5G63250,AT5G63240,AT4G16165,AT1G66870,AT1G66855  
AT5G42720  
AT3G55780 Poptr1|567319  
Poptr1|559973,Poptr1|710878  
AT2G05790 Poptr1|573011,Poptr1|592408,Poptr1|552738  
Poptr1|582963  
AT4G18340  
AT2G27500 Poptr1|721317,Poptr1|594971,Poptr1|555873  
AT3G15800 Poptr1|640954,Poptr1|678440  
AT3G58100 Poptr1|678048,Poptr1|574358  
AT5G67460  
AT4G14080,AT3G23770 Poptr1|597084,Poptr1|597082,Poptr1|65032  
Poptr1|593551,Poptr1|557881  
AT3G46570  
AT2G39640,AT3G55430 Poptr1|696857,Poptr1|696858  
AT5G55180,AT4G26830 Poptr1|728035

AT1G26450,AT1G69295  
AT5G42100  
    Poptr1|351472  
    Poptr1|577171,Poptr1|597219,Poptr1|108949  
AT2G30933    Poptr1|559477,Poptr1|643388  
AT1G29380    Poptr1|674784,Poptr1|660561  
AT5G56590  
AT3G28250,AT2G43670,AT2G43660  
AT3G13560    Poptr1|647477,Poptr1|547619  
    Poptr1|672499  
AT3G57270  
AT1G66250  
    Poptr1|652429  
AT1G11820Poptr1|675534,Poptr1|727451  
    Poptr1|76187,Poptr1|71950  
AT1G77790,AT1G77780    Poptr1|551510,Poptr1|559180  
AT1G18650    Poptr1|569931  
    Poptr1|593550,Poptr1|46318,Poptr1|54683  
AT1G09460    Poptr1|662542,Poptr1|671499  
AT5G35740    Poptr1|732439  
AT1G32860    Poptr1|699211,Poptr1|550452  
AT5G08000,AT5G61130  
AT5G20340,AT5G20330,AT1G33220,AT5G20390,AT5G20560  
AT2G16230,AT4G34480    Poptr1|649422,Poptr1|648596  
    Poptr1|573267,Poptr1|665047,Poptr1|98043  
AT2G26600    Poptr1|578936,Poptr1|560591  
AT4G05430    Poptr1|586811,Poptr1|586815,Poptr1|75566  
    Poptr1|706159,Poptr1|664285  
AT4G16260    Poptr1|55327  
AT2G03505,AT1G13830    Poptr1|656515,Poptr1|698371  
AT2G04910  
AT2G01630    Poptr1|552947,Poptr1|648133,Poptr1|656956  
AT3G57240,AT3G57260    Poptr1|652688,Poptr1|735050  
AT5G47920  
AT5G13880    Poptr1|572822  
    Poptr1|554663  
AT5G13660    Poptr1|583009  
AT5G59830    Poptr1|558106,Poptr1|683838  
    Poptr1|698600,Poptr1|563859,Poptr1|351744  
AT1G79915    Poptr1|63982  
AT1G28510    Poptr1|591359,Poptr1|574372,Poptr1|60746,Poptr1|586062  
AT3G58150  
AT5G10200    Poptr1|654786,Poptr1|71648  
AT5G43120  
AT3G50030    Poptr1|553942  
AT1G43860    Poptr1|714642,Poptr1|643536  
    Poptr1|553541  
AT3G21320  
AT2G25930    Poptr1|685546  
    Poptr1|677680  
AT1G02120    Poptr1|677681  
    Poptr1|551957,Poptr1|677682  
AT1G42550    Poptr1|346544,Poptr1|52281  
AT2G32415    Poptr1|552784  
AT4G29060    Poptr1|702143  
AT3G55840,AT2G40000    Poptr1|345031,Poptr1|724507  
AT4G32260    Poptr1|561911,Poptr1|578220  
AT4G26310    Poptr1|547595  
AT5G52390    Poptr1|570477,Poptr1|701196  
    Poptr1|65106,Poptr1|557992  
AT3G54040    Poptr1|103138,Poptr1|351854,Poptr1|735674  
AT3G03790    Poptr1|571179  
AT4G15180    Poptr1|594422,Poptr1|75497,Poptr1|562330  
AT1G13050,AT3G26350    Poptr1|354749,Poptr1|565132  
    Poptr1|103235  
AT5G56050,AT4G26490    Poptr1|550634,Poptr1|98128  
AT5G56070  
AT2G15430    Poptr1|649603  
AT2G15400    Poptr1|642022  
    Poptr1|666320  
AT3G17920,AT1G48540    Poptr1|569720,Poptr1|666321,Poptr1|666322  
AT3G13845    Poptr1|670522,Poptr1|678488  
AT3G54310,AT2G38430    Poptr1|674035,Poptr1|678691,Poptr1|674032  
AT2G33280,AT1G04570    Poptr1|354638  
    Poptr1|571537  
AT1G64890    Poptr1|56771,Poptr1|702468  
AT2G43740,AT2G43730,AT2G43745,AT1G05770    Poptr1|659084  
    Poptr1|595559,Poptr1|570890  
AT4G04360    Poptr1|596379,Poptr1|568070,Poptr1|568071,Poptr1|579594,Poptr1|584706  
AT2G24290,AT4G30996    Poptr1|738051,Poptr1|695234  
AT1G05070,AT2G32580    Poptr1|572985,Poptr1|692188,Poptr1|677344

AT5G28750 Poptr1|571038,Poptr1|742023  
AT1G34360 Poptr1|557058  
Poptr1|347433  
Poptr1|347432  
AT2G14095 Poptr1|577365,Poptr1|641961  
Poptr1|563974,Poptr1|567317  
AT1G36280,AT4G18440 Poptr1|563975  
Poptr1|583576  
AT3G02580,AT3G02590 Poptr1|677461,Poptr1|580817,Poptr1|714052  
Poptr1|560398,Poptr1|576160  
AT3G56750,AT2G41150  
AT3G01740,AT5G14290 Poptr1|549644  
Poptr1|580663,Poptr1|547718  
Poptr1|584557,Poptr1|592147,Poptr1|596000,Poptr1|559487,Poptr1|102799,Poptr1|547717  
Poptr1|586272  
Poptr1|62806,Poptr1|585567  
Poptr1|104504,Poptr1|593217,Poptr1|597105,Poptr1|591320  
Poptr1|579095,Poptr1|593165,Poptr1|555159,Poptr1|350972  
AT1G16090  
AT1G17340 Poptr1|663443  
AT3G14205 Poptr1|704803,Poptr1|693657,Poptr1|589345,Poptr1|736728  
AT1G22620 Poptr1|102743,Poptr1|592284,Poptr1|702545  
AT3G43220,AT5G20840  
Poptr1|739238  
AT5G06760 Poptr1|667377  
AT2G43950 Poptr1|668303,Poptr1|718123  
AT4G20960 Poptr1|663963,Poptr1|552164  
AT1G10480  
AT1G68360 Poptr1|564550  
AT1G67030 Poptr1|580814,Poptr1|555867  
Poptr1|552499,Poptr1|572644  
Poptr1|46804,Poptr1|642747  
AT1G76560  
AT3G62410,AT2G47400 Poptr1|692261,Poptr1|731704  
AT1G32340 Poptr1|590037  
AT4G00480 Poptr1|700223,Poptr1|347973  
AT4G09820 Poptr1|346994,Poptr1|714955  
AT5G41315,AT1G63650 Poptr1|684876,Poptr1|63535  
AT1G18000,AT1G18010 Poptr1|569694,Poptr1|569695  
Poptr1|597531  
AT2G46860  
AT3G53620 Poptr1|652945  
AT2G18230 Poptr1|76322  
AT4G01480,AT1G01050 Poptr1|748006,Poptr1|342856,Poptr1|664206  
Poptr1|738940,Poptr1|581702  
AT1G13510,AT1G13540,AT1G13470,AT1G13520,AT1G13480,AT1G13490,AT1G13500,AT1G13530,AT1G13550  
Poptr1|578375,Poptr1|345214,Poptr1|566709,Poptr1|696612  
Poptr1|354067  
Poptr1|594290  
AT1G61600 Poptr1|546565  
AT5G12235 Poptr1|560370,Poptr1|576153,Poptr1|557704  
AT4G14305  
Poptr1|675543,Poptr1|584688,Poptr1|594260  
AT4G04470 Poptr1|675544,Poptr1|568052  
Poptr1|725881  
Poptr1|548562,Poptr1|554264  
AT2G45450,AT3G60890 Poptr1|572123,Poptr1|347877  
AT1G07020 Poptr1|557614  
Poptr1|687891,Poptr1|60549  
AT1G09560  
Poptr1|550606,Poptr1|98149,Poptr1|98150,Poptr1|98152,Poptr1|582581  
AT1G10460 Poptr1|565388  
AT3G05930,AT5G26700  
Poptr1|567916  
AT3G10080 Poptr1|563582,Poptr1|55694,Poptr1|660166  
AT3G62020 Poptr1|552405,Poptr1|572505  
Poptr1|108037,Poptr1|678323,Poptr1|592665,Poptr1|680065,Poptr1|591473,Poptr1|672211,Poptr1|59160  
2,Poptr1|557030,Poptr1|697156,Poptr1|556688,Poptr1|556689,Poptr1|546287,Poptr1|556691,Poptr1|556693  
AT1G18970,AT1G18980,AT1G74820 Poptr1|575072  
AT1G72610 Poptr1|343304,Poptr1|685047,Poptr1|640606  
AT5G20630 Poptr1|675842  
Poptr1|571143  
AT5G61750 Poptr1|570391,Poptr1|575494  
AT3G04200,AT3G05950,AT3G04180,AT3G04190,AT3G04150,AT3G04170  
AT5G38930,AT5G38940,AT5G38910,AT4G14630,AT5G38950,AT5G38960,AT5G39180,AT5G39150,AT5G39120,AT5  
G39110,AT5G39100,AT5G39190,AT5G39160,AT5G39130  
Poptr1|584864,Poptr1|596886,Poptr1|594218,Poptr1|747329,Poptr1|101997,Poptr1|56685,Poptr1|597538,  
Poptr1|665360,Poptr1|573786,Poptr1|573788,Poptr1|591472,Poptr1|593478,Poptr1|591240,Poptr1|591239,Poptr1|57  
1145,Poptr1|101774,Poptr1|663029,Poptr1|591242,Poptr1|674028  
Poptr1|594069,Poptr1|564180,Poptr1|563539,Poptr1|649036,Poptr1|59514,Poptr1|563540  
Poptr1|550603,Poptr1|550602,Poptr1|98161

Poptr1|106235,Poptr1|550598,Poptr1|98165  
AT2G33205 Poptr1|350645  
AT3G24460,AT4G13345 Poptr1|58640  
Poptr1|588275  
Poptr1|595128  
Poptr1|593973,Poptr1|589270  
Poptr1|584921  
Poptr1|582758  
AT1G17060  
AT2G46950,AT4G27710,AT2G46960 Poptr1|351283  
AT1G75130  
Poptr1|573239,Poptr1|595588,Poptr1|703068,Poptr1|740233,Poptr1|342634,Poptr1|553365,Poptr1|58530  
0  
Poptr1|673700,Poptr1|99480,Poptr1|674662  
AT1G67110,AT5G38450 Poptr1|743744,Poptr1|555847  
Poptr1|353295  
Poptr1|570446,Poptr1|584922  
AT3G14660,AT3G14650,AT3G14690,AT3G14640,AT3G14680,AT3G14610,AT3G14630,AT3G14620  
Poptr1|595797,Poptr1|99472,Poptr1|99468,Poptr1|100986  
Poptr1|350916  
Poptr1|588269  
Poptr1|588267,Poptr1|675410  
Poptr1|708434,Poptr1|588287  
AT5G24910,AT5G24900 Poptr1|743896  
Poptr1|99528,Poptr1|589148,Poptr1|566769  
Poptr1|591820  
AT2G26710 Poptr1|352119,Poptr1|100601  
Poptr1|568884,Poptr1|568883  
AT5G52400 Poptr1|587512,Poptr1|346076,Poptr1|575832  
Poptr1|673701  
AT2G39370 Poptr1|563827,Poptr1|567506  
AT2G37380 Poptr1|352539  
AT1G17330 Poptr1|686027,Poptr1|585406  
AT1G78510,AT1G17050  
Poptr1|107309,Poptr1|586698  
Poptr1|595796,Poptr1|584924,Poptr1|550337,Poptr1|550339  
Poptr1|590802  
Poptr1|588271,Poptr1|99471,Poptr1|586699,Poptr1|99479,Poptr1|588276  
AT2G34630 Poptr1|739257,Poptr1|566762  
Poptr1|592758  
AT4G29730  
AT2G19520 Poptr1|653315,Poptr1|589194,Poptr1|98323  
AT3G27610,AT2G01220 Poptr1|107389,Poptr1|55254  
AT2G45620 Poptr1|644365,Poptr1|730929  
AT3G50860 Poptr1|679228,Poptr1|686086  
AT1G47830  
AT4G35410,AT2G17380 Poptr1|699509,Poptr1|731011  
Poptr1|745178  
Poptr1|550891,Poptr1|652060  
AT2G19790 Poptr1|717005  
AT3G06260 Poptr1|660128,Poptr1|655753  
AT3G62660 Poptr1|664389,Poptr1|552490  
AT3G50760  
AT1G13250 Poptr1|55285,Poptr1|354131  
AT1G19300 Poptr1|59426,Poptr1|551913  
AT1G24170,AT1G70090 Poptr1|355002,Poptr1|657556  
AT3G28340  
Poptr1|357020,Poptr1|686070  
AT1G02720,AT4G02130  
AT1G52160,AT3G16260 Poptr1|683766  
AT1G53520 Poptr1|642417,Poptr1|673698  
AT1G50370,AT3G19980 Poptr1|725216,Poptr1|655626  
AT5G55260 Poptr1|707576,Poptr1|687536  
AT2G39840 Poptr1|563948,Poptr1|724596  
AT5G10900  
AT5G43380  
AT1G48120  
Poptr1|682781,Poptr1|733185,Poptr1|657542,Poptr1|726341  
AT4G26720  
AT4G11240Poptr1|709258  
AT2G29400  
AT2G42810 Poptr1|572840  
Poptr1|735123,Poptr1|561215  
AT3G05580,AT5G27840 Poptr1|570773,Poptr1|744555  
AT1G64040  
AT1G59830,AT1G10430,AT1G69960  
AT3G58500,AT2G42500 Poptr1|547629,Poptr1|711677  
AT5G63870 Poptr1|642579,Poptr1|550530,Poptr1|727218  
Poptr1|591226,Poptr1|59222  
Poptr1|584508  
AT3G46820,AT5G59160 Poptr1|641133,Poptr1|723195,Poptr1|573710,Poptr1|738219,Poptr1|571089  
AT1G48175 Poptr1|560664

AT5G48720 Poptr1|553183,Poptr1|573330  
AT5G08060 Poptr1|712804  
AT3G07170,AT5G48680 Poptr1|573345,Poptr1|553190  
AT1G62350 Poptr1|582482,Poptr1|649877,Poptr1|549389  
AT3G46870 Poptr1|558010  
Poptr1|562191  
AT3G55160 Poptr1|545746  
AT2G46980 Poptr1|348446  
AT3G18690 Poptr1|584484,Poptr1|596710,Poptr1|562425,Poptr1|595384  
AT1G72380  
Poptr1|587426,Poptr1|349650  
AT1G72390 Poptr1|553578,Poptr1|553577,Poptr1|98995  
Poptr1|551674  
AT2G19810,AT4G29190 Poptr1|736815,Poptr1|717844  
AT5G07500 Poptr1|63317  
AT5G44260,AT1G03790 Poptr1|75314,Poptr1|703494  
AT3G55980,AT2G40140  
Poptr1|49070,Poptr1|557776  
AT2G41900 Poptr1|576336,Poptr1|560536,Poptr1|716932  
AT5G12850 Poptr1|557852,Poptr1|64481  
AT5G58620 Poptr1|728939,Poptr1|564036,Poptr1|659505,Poptr1|549056  
AT2G25900  
AT4G21700 Poptr1|580121,Poptr1|97167  
AT1G79790 Poptr1|698310  
AT3G06483 Poptr1|54871  
AT4G33925 Poptr1|649657  
AT1G80180,AT1G15400 Poptr1|553642,Poptr1|640631  
AT5G20100  
Poptr1|567731,Poptr1|563641,Poptr1|696980  
AT5G40780 Poptr1|706915  
AT1G08233  
AT1G48640  
AT1G71680  
AT1G08230 Poptr1|594845,Poptr1|686612  
Poptr1|557026,Poptr1|567730  
AT3G01760,AT1G61270  
AT4G35180  
AT5G41800 Poptr1|63443,Poptr1|343681  
Poptr1|565074,Poptr1|55013,Poptr1|64904  
AT1G47670 Poptr1|689565  
AT1G25530 Poptr1|698254,Poptr1|564504  
AT1G67640,AT1G24400  
Poptr1|652182,Poptr1|556700,Poptr1|573266,Poptr1|573269,Poptr1|546294,Poptr1|342132,Poptr1|58379  
4,Poptr1|556701  
AT1G16080  
Poptr1|639740,Poptr1|547715,Poptr1|579630,Poptr1|587185,Poptr1|747358,Poptr1|554915,Poptr1|55492  
1  
AT2G30320  
Poptr1|574508  
AT3G51820 Poptr1|735891,Poptr1|653150  
AT2G27530,AT1G08360,AT5G22440  
Poptr1|679931,Poptr1|655205,Poptr1|683275,Poptr1|655215  
Poptr1|584732  
Poptr1|593512,Poptr1|597355,Poptr1|575592,Poptr1|568156,Poptr1|568152,Poptr1|106471,Poptr1|56815  
8  
AT5G35830 Poptr1|584653  
AT3G18670 Poptr1|595383,Poptr1|53122  
Poptr1|109262,Poptr1|655795,Poptr1|563603,Poptr1|563613,Poptr1|563608  
Poptr1|65646  
Poptr1|346941,Poptr1|551134,Poptr1|584731,Poptr1|575584,Poptr1|575585,Poptr1|575595,Poptr1|58473  
0,Poptr1|586018,Poptr1|568157,Poptr1|595979,Poptr1|103184,Poptr1|587757,Poptr1|587758,Poptr1|568154,Poptr1|5  
68155,Poptr1|568131,Poptr1|568146,Poptr1|568148,Poptr1|580958,Poptr1|568149,Poptr1|568151,Poptr1|568137,Pop  
tr1|568647,Poptr1|103700,Poptr1|563611,Poptr1|584728,Poptr1|597421,Poptr1|588698,Poptr1|63003,Poptr1|673616  
,Poptr1|698838,Poptr1|584729,Poptr1|575594,Poptr1|582425,Poptr1|568132,Poptr1|568130,Poptr1|568133,Poptr1|56  
8129  
AT5G04680,AT5G04700,AT5G04690,AT5G04730  
AT3G54070,AT5G35810 Poptr1|672973,Poptr1|583662,Poptr1|98751,Poptr1|575644  
AT3G43410,AT5G35945,AT1G67390,AT1G78470,AT1G80960,AT3G60790 Poptr1|584889  
AT1G80280,AT1G15490 Poptr1|595649,Poptr1|691207  
AT3G10840  
AT3G55880,AT2G40095 Poptr1|345040  
AT1G52750  
Poptr1|581041  
AT5G57300 Poptr1|737699  
AT4G02030 Poptr1|552525,Poptr1|731707,Poptr1|552524  
AT5G14030 Poptr1|691669,Poptr1|597101  
AT3G56660,AT2G40950  
AT3G10800  
Poptr1|652546,Poptr1|701299  
AT5G23120  
Poptr1|562823  
Poptr1|57829,Poptr1|699322

AT5G52470,AT4G25630  
AT5G52490  
    Poptr1|345560  
    Poptr1|572276  
AT1G31720  
AT4G19370            Poptr1|703828  
AT3G53630            Poptr1|652944  
AT5G50960            Poptr1|706890  
AT1G50900            Poptr1|663367  
AT2G15220,AT2G15130  
    Poptr1|649635,Poptr1|549955,Poptr1|549954  
AT2G15170            Poptr1|107957  
AT3G01160Poptr1|356840  
    Poptr1|356841  
AT4G35040,AT2G16770            Poptr1|648793,Poptr1|649217  
AT3G51960  
AT5G50970            Poptr1|570358,Poptr1|570357,Poptr1|733786  
AT5G19920  
AT5G39210            Poptr1|556308  
    Poptr1|566982,Poptr1|656478  
AT1G26660  
    Poptr1|59765  
AT2G43370  
AT1G35620            Poptr1|592253,Poptr1|738832  
AT4G29735            Poptr1|653261,Poptr1|673385  
AT5G42785            Poptr1|346805,Poptr1|559742  
AT4G26730,AT2G16030            Poptr1|574521,Poptr1|571852  
    Poptr1|652973  
AT5G42760            Poptr1|691993  
AT5G02310  
AT3G58180            Poptr1|694749,Poptr1|684601  
AT3G43260,AT3G62530  
AT5G04830  
    Poptr1|698787  
    Poptr1|563550  
AT4G24790  
AT4G18820,AT5G45720            Poptr1|568667,Poptr1|693987  
    Poptr1|575274,Poptr1|570191  
    Poptr1|570333  
AT2G02480,AT1G14460            Poptr1|60080,Poptr1|553540,Poptr1|579788  
AT4G16160            Poptr1|659054,Poptr1|656668  
AT2G28900  
    Poptr1|691403  
AT3G14490,AT3G29410,AT3G32030,AT1G33750,AT3G14540,AT3G14520,AT1G31950,AT4G13300,AT4G13280,AT5  
G44630,AT4G20200,AT1G66020,AT4G20230,AT3G29190,AT4G20210,AT3G29110,AT1G48820,AT1G48800,AT2G23  
230,AT4G15870,AT5G48110,AT1G70080,AT5G23960  
AT4G16740,AT4G16730,AT3G25830,AT3G25820,AT3G25810,AT2G24210  
    Poptr1|579396,Poptr1|75504,Poptr1|741312  
    Poptr1|588923,Poptr1|571729,Poptr1|597287,Poptr1|559084,Poptr1|594075,Poptr1|107306,Poptr1|70247  
4,Poptr1|579362,Poptr1|107151  
    Poptr1|597307  
    Poptr1|75916  
    Poptr1|675385,Poptr1|597288  
    Poptr1|704110,Poptr1|575250,Poptr1|571451,Poptr1|687634,Poptr1|694380  
    Poptr1|580566  
    Poptr1|594133  
    Poptr1|562340  
AT2G37140            Poptr1|574035  
    Poptr1|594132  
    Poptr1|559083  
    Poptr1|579968  
    Poptr1|665332  
    Poptr1|582629,Poptr1|748275,Poptr1|75507,Poptr1|596304,Poptr1|103160,Poptr1|101898,Poptr1|579972  
    Poptr1|597016,Poptr1|597522,Poptr1|75917  
    Poptr1|597291,Poptr1|568383  
AT1G61680            Poptr1|544960,Poptr1|544964,Poptr1|568379  
AT3G31415            Poptr1|588221  
    Poptr1|65158,Poptr1|65159,Poptr1|586304  
    Poptr1|579965,Poptr1|672342,Poptr1|545320,Poptr1|591017,Poptr1|573694  
    Poptr1|579969,Poptr1|562339  
    Poptr1|589170  
    Poptr1|587850  
    Poptr1|595756  
AT2G05755            Poptr1|573006  
AT4G13885  
AT4G13870            Poptr1|707164,Poptr1|681314  
AT1G10760            Poptr1|697986,Poptr1|345541  
AT4G24450            Poptr1|354794,Poptr1|551703  
AT3G07770            Poptr1|573079  
    Poptr1|577646  
    Poptr1|586939  
    Poptr1|577101

Poptr1|685443  
Poptr1|582579  
AT5G56010,AT5G56030,AT5G56000  
AT5G52640 Poptr1|556104,Poptr1|592912  
Poptr1|691780,Poptr1|685884,Poptr1|582316,Poptr1|550613  
AT4G24190  
Poptr1|350270  
AT2G04030 Poptr1|687208,Poptr1|564455  
AT4G37720,AT2G22860 Poptr1|709855,Poptr1|572016  
AT1G13590  
AT3G49780,AT5G65870 Poptr1|663692,Poptr1|563339  
AT2G44850 Poptr1|591787,Poptr1|551953  
AT4G25950 Poptr1|574437,Poptr1|58999,Poptr1|592281  
AT3G01390,AT4G23710 Poptr1|655912,Poptr1|659874  
AT1G50450 Poptr1|557885  
AT2G20190 Poptr1|692025  
AT3G58830 Poptr1|72676,Poptr1|551255  
AT5G37630 Poptr1|714194  
AT1G75670 Poptr1|715393  
Poptr1|652035,Poptr1|642995  
Poptr1|590193  
AT3G23940 Poptr1|683580,Poptr1|554826  
AT2G45010 Poptr1|347803  
AT5G51400 Poptr1|671265,Poptr1|590182,Poptr1|684928  
Poptr1|555219  
AT2G18660 Poptr1|695200  
Poptr1|669494  
AT4G30380 Poptr1|344517  
AT5G48520 Poptr1|688387  
AT3G57200,AT2G41450 Poptr1|351465,Poptr1|688696  
AT3G08550 Poptr1|554991,Poptr1|547860  
Poptr1|47829  
AT3G08740  
AT4G19550 Poptr1|691035  
AT2G45100,AT3G09360,AT2G01280  
Poptr1|558001,Poptr1|64321  
AT4G05523 Poptr1|657451  
AT1G13120  
Poptr1|579056  
Poptr1|657160,Poptr1|698070  
AT3G22425,AT4G14910  
AT3G17470 Poptr1|725550  
AT4G13580,AT3G24020 Poptr1|640003,Poptr1|554808,Poptr1|640004  
AT1G67840 Poptr1|687048  
Poptr1|726214  
AT5G28830 Poptr1|571034,Poptr1|680280  
AT4G00210  
AT2G30340  
AT2G28500,AT1G07900 Poptr1|353428,Poptr1|698639  
AT2G45410 Poptr1|347870,Poptr1|663819  
AT5G06080 Poptr1|567390  
Poptr1|695987  
Poptr1|720235,Poptr1|567225  
AT2G31310  
AT1G65620 Poptr1|659394,Poptr1|656362  
Poptr1|577952,Poptr1|561656  
AT3G26660,AT3G26620 Poptr1|575746,Poptr1|570523  
AT4G22700,AT5G35900,AT2G23660  
AT5G66870 Poptr1|76149,Poptr1|558839  
AT3G50510  
AT3G13850 Poptr1|670521  
AT3G27650  
AT1G06280 Poptr1|582780,Poptr1|574365  
Poptr1|573102  
AT2G40470  
Poptr1|596941  
AT2G30130 Poptr1|64697,Poptr1|54593  
AT2G42440,AT3G58190  
Poptr1|571894,Poptr1|574505  
AT2G42430 Poptr1|346867,Poptr1|52135,Poptr1|679638  
Poptr1|76148  
AT5G63090 Poptr1|666518,Poptr1|662026,Poptr1|641633  
AT1G72980  
AT1G36000,AT2G19510,AT2G19820  
Poptr1|567806  
AT3G11090Poptr1|659480,Poptr1|656281  
Poptr1|551062  
AT3G27940 Poptr1|99959  
AT3G03760  
AT3G47870 Poptr1|666365,Poptr1|345905  
AT1G16530  
AT4G00220,AT2G45420 Poptr1|572115,Poptr1|347871



AT1G31320 Poptr1|693334  
AT2G21070 Poptr1|648758  
AT5G15870,AT1G18310 Poptr1|556167  
AT5G11520Poptr1|654019  
AT1G62800,AT5G19550  
Poptr1|352803  
AT2G30970 Poptr1|57261  
AT4G31990 Poptr1|689059,Poptr1|654206  
Poptr1|689103  
Poptr1|577144,Poptr1|577145,Poptr1|351974  
Poptr1|589392  
AT2G22880,AT4G37710 Poptr1|571986,Poptr1|563344  
Poptr1|717428,Poptr1|735903  
AT2G30060,AT1G07140,AT5G58590 Poptr1|557663,Poptr1|691513  
AT2G28690 Poptr1|561924,Poptr1|549213  
AT5G09940 Poptr1|567824,Poptr1|353166  
AT1G44920 Poptr1|644003  
AT1G09830 Poptr1|103794,Poptr1|673329,Poptr1|596749  
AT2G20495 Poptr1|694767  
Poptr1|689352  
AT1G19130  
Poptr1|564669  
Poptr1|566438  
AT1G14850  
AT5G23230,AT5G23220 Poptr1|583484  
AT4G10710,AT4G10670 Poptr1|570674,Poptr1|581621,Poptr1|570675,Poptr1|97576  
Poptr1|579061,Poptr1|703821  
AT5G51290  
AT4G29330 Poptr1|685680  
AT4G10750 Poptr1|548272,Poptr1|350405  
AT4G24080,AT4G24070  
Poptr1|676750  
Poptr1|583107  
Poptr1|108694,Poptr1|640820,Poptr1|588870  
Poptr1|104995  
AT4G33520 Poptr1|553485,Poptr1|712234,Poptr1|63921  
Poptr1|681171  
Poptr1|676974  
Poptr1|561582  
Poptr1|554970,Poptr1|547880  
Poptr1|109071  
Poptr1|593740,Poptr1|593037,Poptr1|588899  
AT4G37270 Poptr1|719175  
Poptr1|553486,Poptr1|640821  
AT5G44790 Poptr1|349721,Poptr1|739789  
Poptr1|736950  
AT1G63440 Poptr1|63556,Poptr1|554346,Poptr1|712519  
Poptr1|586671  
Poptr1|694445  
Poptr1|107705,Poptr1|592790  
AT5G21930 Poptr1|561581,Poptr1|668858  
AT3G56130 Poptr1|659440,Poptr1|656310  
AT1G52670,AT3G15690 Poptr1|63699,Poptr1|349487  
AT1G13300,AT3G25790  
AT1G49560  
AT4G37180 Poptr1|557338,Poptr1|581474,Poptr1|651036,Poptr1|655180  
AT2G03500 Poptr1|561130  
AT1G68670,AT1G25550 Poptr1|345244  
AT3G51980 Poptr1|548146  
AT4G38060,AT5G65480 Poptr1|551664  
AT1G11780Poptr1|548028,Poptr1|554781  
Poptr1|579665  
AT5G16120 Poptr1|690099  
AT2G47630,AT3G62860  
AT1G52760 Poptr1|693720,Poptr1|48806  
Poptr1|710302  
AT1G11090Poptr1|586217,Poptr1|55765  
AT2G39410,AT2G39420,AT3G55180,AT2G39400 Poptr1|353485,Poptr1|567499  
Poptr1|555852  
Poptr1|342884,Poptr1|731823  
Poptr1|582575,Poptr1|591105,Poptr1|65949  
AT1G77420 Poptr1|723741  
AT3G55190  
AT5G19290,AT5G14980 Poptr1|353389  
AT1G77122 Poptr1|551353  
AT1G69210  
Poptr1|685497,Poptr1|578297,Poptr1|566818  
AT3G60240 Poptr1|644266  
AT4G30680,AT1G62410,AT2G24050,AT5G57870 Poptr1|561350,Poptr1|737966  
AT1G29395,AT1G29390 Poptr1|674785  
AT1G20600,AT4G03170,AT4G03160 Poptr1|579432  
AT3G10550,AT5G04540 Poptr1|55637,Poptr1|353301

AT3G50220,AT5G67210 Poptr1|558891,Poptr1|562940  
AT2G15440 Poptr1|65209,Poptr1|54514  
AT2G17900 Poptr1|559193  
AT3G17120 Poptr1|564365,Poptr1|566860  
AT4G01960,AT1G02380 Poptr1|552557  
AT5G08750,AT5G63780 Poptr1|562534,Poptr1|71586  
AT3G04610 Poptr1|595396,Poptr1|729865  
AT4G26000 Poptr1|583177,Poptr1|746572  
Poptr1|662941,Poptr1|680248  
AT1G19010,AT1G74860 Poptr1|577538,Poptr1|641576  
AT5G04040 Poptr1|576214,Poptr1|351450  
AT3G57140  
AT2G20330 Poptr1|573381  
AT3G27320,AT5G14310  
Poptr1|658201  
Poptr1|351452,Poptr1|658200,Poptr1|565090,Poptr1|565089  
Poptr1|643976  
AT1G10030  
AT2G19950 Poptr1|669375,Poptr1|669377,Poptr1|587378  
AT3G55200,AT3G55220 Poptr1|353486  
AT2G28450  
Poptr1|558250  
Poptr1|564620  
AT2G01460 Poptr1|564619  
AT2G36470 Poptr1|545357,Poptr1|580813  
AT3G13229 Poptr1|550626  
AT3G04860,AT5G28150 Poptr1|56629,Poptr1|59949  
AT2G27770 Poptr1|556956  
Poptr1|595454,Poptr1|595456  
AT5G11000Poptr1|352991,Poptr1|737321  
AT5G48270  
Poptr1|551162,Poptr1|559564  
AT2G25200  
AT4G12690,AT2G04220 Poptr1|51686,Poptr1|562515  
Poptr1|570165,Poptr1|575239,Poptr1|566002  
AT3G04120,AT1G13440 Poptr1|657409,Poptr1|687033,Poptr1|706904  
Poptr1|575307,Poptr1|570215  
AT1G16300,AT1G79530 Poptr1|686413,Poptr1|724220  
AT5G16460 Poptr1|596969  
Poptr1|568774  
Poptr1|593318  
AT2G34380,AT1G29760 Poptr1|555622,Poptr1|660721  
AT3G45200,AT5G24355,AT5G11220,AT1G64870 Poptr1|344727  
Poptr1|655012  
AT3G19740,AT1G50140  
Poptr1|646682  
AT4G28000 Poptr1|580581,Poptr1|569441  
Poptr1|594363,Poptr1|596300,Poptr1|582121,Poptr1|595320,Poptr1|594359,Poptr1|355396,Poptr1|66162  
0,Poptr1|661619,Poptr1|661617,Poptr1|572130,Poptr1|594364,Poptr1|679685,Poptr1|592084,Poptr1|548395,Poptr1|6  
46683,Poptr1|650906,Poptr1|582915,Poptr1|355384,Poptr1|591446  
AT1G62130,AT4G24860  
Poptr1|548396  
AT4G02480,AT1G02890 Poptr1|666645,Poptr1|662137,Poptr1|57220,Poptr1|684288  
AT1G64110  
AT1G36380 Poptr1|559165  
AT2G21350,AT4G39040 Poptr1|557189  
AT5G17830,AT3G04440,AT3G03700 Poptr1|571275  
AT5G50200,AT4G24720 Poptr1|748317,Poptr1|575245,Poptr1|699402,Poptr1|574016,Poptr1|591178  
AT2G14660 Poptr1|649704  
AT3G59680 Poptr1|683160  
Poptr1|554331,Poptr1|577433,Poptr1|640520,Poptr1|582401  
AT4G21010,AT4G20330  
AT1G25375 Poptr1|698225  
AT1G55870 Poptr1|65502  
AT5G07880  
AT1G13890 Poptr1|564278  
AT5G61210 Poptr1|345878,Poptr1|688436  
AT5G58220  
Poptr1|343130  
AT3G53400 Poptr1|689378  
AT5G03190 Poptr1|597204,Poptr1|578436  
AT5G54290 Poptr1|704444  
Poptr1|589762  
AT4G01800  
Poptr1|671073  
AT1G21650 Poptr1|551406  
Poptr1|557779  
AT4G15030 Poptr1|706416  
AT5G49800 Poptr1|742613  
AT5G57440,AT4G25840 Poptr1|702176  
AT4G09020

AT2G39930 Poptr1|689189,Poptr1|560622  
Poptr1|572805  
AT1G03310 Poptr1|347426  
Poptr1|572806  
Poptr1|348493  
Poptr1|593670  
AT1G27150,AT1G27110 Poptr1|565411  
AT2G22910 Poptr1|582654  
AT4G37670 Poptr1|718045,Poptr1|730706  
Poptr1|588331  
AT3G25740  
AT4G37040 Poptr1|51845  
AT2G45240 Poptr1|730835  
AT1G13270 Poptr1|720678  
Poptr1|588337  
AT3G55850 Poptr1|555050  
AT4G23890 Poptr1|554492,Poptr1|691079  
Poptr1|680727,Poptr1|573379,Poptr1|645558  
Poptr1|589781  
AT2G20360  
AT4G03410 Poptr1|571769,Poptr1|580371  
AT1G52870 Poptr1|726950  
Poptr1|666247,Poptr1|670117  
AT2G46090 Poptr1|644509,Poptr1|644507  
AT2G42310,AT3G57785 Poptr1|745577  
AT4G02720 Poptr1|651773,Poptr1|346971  
AT1G05440 Poptr1|566230,Poptr1|564856  
AT1G54740 Poptr1|353242,Poptr1|570892  
AT1G59660,AT1G10390 Poptr1|707969  
AT1G63540,AT1G63530 Poptr1|655731  
AT5G05980 Poptr1|567359,Poptr1|563946  
AT3G55630 Poptr1|595739  
AT3G10160 Poptr1|576221,Poptr1|560447  
Poptr1|590093  
AT1G26520 Poptr1|656501  
Poptr1|590092  
AT1G80480,AT1G15730 Poptr1|60156  
Poptr1|659226,Poptr1|584405,Poptr1|594127  
AT4G33160 Poptr1|352569  
AT5G24580 Poptr1|57444,Poptr1|569671  
AT5G50740  
AT5G50730  
AT1G29000  
AT3G21490  
AT5G03380,AT2G36950  
AT5G60800 Poptr1|584437,Poptr1|558297  
Poptr1|107251,Poptr1|97990,Poptr1|701224,Poptr1|351147  
AT2G28090  
AT3G02960 Poptr1|575985  
AT5G63530 Poptr1|666698,Poptr1|728487  
Poptr1|549773  
AT1G03320 Poptr1|676051,Poptr1|576732,Poptr1|595688  
Poptr1|666699  
AT3G11250,AT3G09200,AT2G40010 Poptr1|698514,Poptr1|656219  
AT1G73875 Poptr1|569830  
AT3G18500  
AT3G58580  
AT1G31530  
AT5G11350  
AT1G31500 Poptr1|350015  
AT3G58560 Poptr1|695262,Poptr1|701406  
Poptr1|569831  
AT5G07020 Poptr1|673667,Poptr1|555091,Poptr1|639793  
AT1G67850,AT1G24570 Poptr1|726215,Poptr1|686196  
AT2G28310,AT1G08040 Poptr1|686928  
AT4G18530 Poptr1|742556,Poptr1|583482  
AT3G27470 Poptr1|577479  
AT1G61240,AT1G11170 Poptr1|694022,Poptr1|568274  
Poptr1|568275  
AT3G26440,AT1G13000  
Poptr1|738616  
AT4G12840  
AT3G54970 Poptr1|572228  
AT3G54650 Poptr1|559640,Poptr1|346902  
Poptr1|577785  
AT4G31150  
AT3G08560 Poptr1|734387

AT1G64200,AT4G11150  
Poptr1|674027,Poptr1|663024  
Poptr1|691231  
AT5G22010 Poptr1|63830  
AT5G43500  
Poptr1|681717,Poptr1|658391  
AT4G16155,AT3G16950 Poptr1|566793,Poptr1|696620  
Poptr1|587462  
AT4G36820,AT2G23790,AT5G66650 Poptr1|357017,Poptr1|53350  
AT5G42610 Poptr1|595942,Poptr1|591835,Poptr1|551919  
AT3G50560 Poptr1|696039,Poptr1|51840  
Poptr1|690320  
AT4G26230,AT5G56710,AT2G19740 Poptr1|641386,Poptr1|722746  
AT1G30910 Poptr1|646882  
AT5G44720  
AT3G28970 Poptr1|694114,Poptr1|577654  
Poptr1|577655  
AT5G14910 Poptr1|691545  
AT5G63880,AT5G09260 Poptr1|53151,Poptr1|46705,Poptr1|678388  
AT5G15920 Poptr1|549282  
AT1G69320,AT1G26600 Poptr1|566953  
AT4G38880  
AT2G16570,AT4G34740 Poptr1|649300,Poptr1|648711  
Poptr1|589803  
Poptr1|597079,Poptr1|707134  
AT4G14040,AT4G14030,AT3G23800  
AT3G02090 Poptr1|648539,Poptr1|736441  
AT4G25120 Poptr1|100910  
AT2G15560 Poptr1|671445,Poptr1|557397  
AT2G38020 Poptr1|342326,Poptr1|72705,Poptr1|583003,Poptr1|677307  
AT4G25830  
AT2G35760,AT4G16442 Poptr1|575900  
AT1G61780  
Poptr1|568211,Poptr1|713554  
AT4G18905,AT4G18900,AT4G35370 Poptr1|76351,Poptr1|747757,Poptr1|593896  
AT2G42780 Poptr1|569847  
Poptr1|675247,Poptr1|350752,Poptr1|350973,Poptr1|583757,Poptr1|647209,Poptr1|705248  
AT1G79690  
AT4G14590 Poptr1|568481,Poptr1|64646  
AT5G06430 Poptr1|591889  
Poptr1|577108,Poptr1|589105  
AT5G65720 Poptr1|353122,Poptr1|718084  
AT2G32520 Poptr1|552778,Poptr1|591358,Poptr1|732264  
AT1G48200 Poptr1|692721  
AT1G04700 Poptr1|350665  
AT1G16270,AT1G79570 Poptr1|558720  
Poptr1|737809  
AT5G57610 Poptr1|61116  
Poptr1|562843  
AT3G24720  
Poptr1|646432  
Poptr1|63087  
AT2G35050 Poptr1|744100  
AT3G46920 Poptr1|653517  
AT4G26170,AT5G56770,AT5G56780 Poptr1|352075  
AT1G02700,AT4G02140 Poptr1|572650  
AT1G47420 Poptr1|677822  
AT1G56310 Poptr1|97812,Poptr1|576687  
AT5G19980 Poptr1|746895  
AT1G76340 Poptr1|565058,Poptr1|726076,Poptr1|658156  
Poptr1|348274  
Poptr1|355074,Poptr1|349406,Poptr1|349259,Poptr1|101746,Poptr1|103571,Poptr1|72407,Poptr1|100546,  
Poptr1|104521,Poptr1|100937,Poptr1|105280,Poptr1|63028,Poptr1|100086,Poptr1|99492,Poptr1|99506,Poptr1|35507  
6,Poptr1|103896,Poptr1|103708,Poptr1|99097,Poptr1|102318,Poptr1|561087,Poptr1|107663,Poptr1|577861,Poptr1|10  
2691,Poptr1|72062,Poptr1|64135  
Poptr1|100934  
Poptr1|349258,Poptr1|99934  
AT1G36550 Poptr1|576751,Poptr1|72072  
AT2G20280  
Poptr1|576637,Poptr1|589379,Poptr1|579857,Poptr1|686520  
Poptr1|101250  
AT1G49320 Poptr1|54466,Poptr1|546043,Poptr1|682487  
Poptr1|556450  
Poptr1|586237,Poptr1|562370,Poptr1|671875,Poptr1|596258,Poptr1|556303,Poptr1|738158,Poptr1|57360  
5,Poptr1|573607,Poptr1|586234,Poptr1|573609  
AT5G25610 Poptr1|561796,Poptr1|578117  
Poptr1|667428  
AT2G22040,AT3G18140  
AT1G07960 Poptr1|650541  
AT2G47470 Poptr1|731726,Poptr1|552506  
AT1G33140,AT1G33120,AT4G10450 Poptr1|699199,Poptr1|569228,Poptr1|705555,Poptr1|681880  
AT3G03150 Poptr1|596936

AT5G06140 Poptr1|561477,Poptr1|701471  
 AT2G02550  
 AT1G29630 Poptr1|568479  
 AT1G18090 Poptr1|574972  
 AT3G51790 Poptr1|554966  
 Poptr1|590719  
 Poptr1|554615  
 AT1G30880  
 AT3G47850 Poptr1|699452  
 AT3G13940 Poptr1|597656  
 AT5G13560 Poptr1|567507,Poptr1|563824  
 AT2G37370 Poptr1|576608  
 AT4G37000 Poptr1|590248,Poptr1|76116  
 Poptr1|696003,Poptr1|655153  
 AT3G23610 Poptr1|746924  
 AT5G23720 Poptr1|570339,Poptr1|575447  
 AT3G06110  
 AT4G34310 Poptr1|347676,Poptr1|703101  
 Poptr1|681008  
 AT2G40360 Poptr1|703764  
 AT5G13630 Poptr1|695539  
 Poptr1|673663  
 AT4G27490 Poptr1|650481,Poptr1|595078  
 Poptr1|564142  
 AT2G21820 Poptr1|659386  
 Poptr1|734644,Poptr1|351315  
 AT5G13750,AT5G13740 Poptr1|579134,Poptr1|594291,Poptr1|594287,Poptr1|660083,Poptr1|686565  
 AT3G43790  
 AT4G21580 Poptr1|555515  
 Poptr1|674604,Poptr1|573233  
 AT5G61510 Poptr1|742642,Poptr1|702930  
 Poptr1|356288,Poptr1|701170  
 AT3G47180  
 AT1G73760,AT1G17970 Poptr1|569793,Poptr1|666243  
 Poptr1|724954  
 Poptr1|690885,Poptr1|712288  
 Poptr1|650884  
 AT2G37150 Poptr1|344909,Poptr1|659854  
 AT5G52150  
 AT4G31450  
 AT1G53190,AT3G15070 Poptr1|642365,Poptr1|660699  
 AT3G19910 Poptr1|719012  
 AT3G63530 Poptr1|64561,Poptr1|649962  
 AT5G10650,AT5G24870 Poptr1|583148,Poptr1|583150,Poptr1|586323  
 AT4G35870 Poptr1|562907,Poptr1|593795  
 AT1G72020 Poptr1|597240,Poptr1|665745,Poptr1|678126  
 AT1G06790 Poptr1|643210  
 AT5G47770,AT4G17190 Poptr1|671981,Poptr1|671980,Poptr1|560081  
 Poptr1|552812,Poptr1|552815,Poptr1|572941  
 AT3G59280,AT5G61880 Poptr1|57711,Poptr1|687839  
 AT1G64080 Poptr1|646680,Poptr1|548403  
 Poptr1|107252  
 AT3G54170 Poptr1|348329  
 AT1G22850 Poptr1|740833,Poptr1|702517  
 AT1G53720  
 AT1G44478 Poptr1|562866,Poptr1|71852  
 AT5G49550 Poptr1|580718  
 AT3G05510 Poptr1|744530  
 AT1G60200 Poptr1|720481,Poptr1|698115  
 AT3G48910,AT3G48900 Poptr1|57810  
 AT1G33810 Poptr1|665696  
 Poptr1|559398,Poptr1|347105  
 Poptr1|645393  
 AT1G72080 Poptr1|642908  
 AT1G20220 Poptr1|652132  
 AT1G76010 Poptr1|642907  
 AT1G48550 Poptr1|733107  
 Poptr1|672725  
 Poptr1|681650  
 AT3G58160 Poptr1|681646  
 Poptr1|681648  
 AT2G31900  
 Poptr1|650335  
 Poptr1|672720  
 AT1G04600,AT2G33240 Poptr1|696347  
 AT2G20290  
 Poptr1|672722  
 Poptr1|674691  
 AT4G28710  
 Poptr1|579393  
 AT1G08730,AT1G54560 Poptr1|61258  
 AT4G33200 Poptr1|561578,Poptr1|561579

AT1G17580  
Poptr1|681649  
AT5G20450  
AT1G04160,AT5G43900 Poptr1|343195  
Poptr1|672719  
Poptr1|650334  
AT1G42680  
Poptr1|742904  
AT5G20470  
Poptr1|346873  
AT5G20490 Poptr1|561027  
Poptr1|672724  
Poptr1|672726  
AT4G27370,AT5G54280 Poptr1|726962,Poptr1|582092,Poptr1|653808  
AT1G50360,AT3G19960 Poptr1|71776,Poptr1|695955  
AT4G28715 Poptr1|672721  
Poptr1|679913,Poptr1|556813  
AT5G22400  
AT2G27440,AT1G08340  
AT2G46710 Poptr1|711250,Poptr1|731430  
AT3G11490  
AT4G03100 Poptr1|585913,Poptr1|552642,Poptr1|572768  
Poptr1|735368,Poptr1|561489  
AT1G72320 Poptr1|553831  
Poptr1|348036  
AT2G46240  
Poptr1|350586  
AT1G12060 Poptr1|575961  
AT1G29600  
AT2G47850  
AT2G32930,AT1G04990 Poptr1|552730,Poptr1|732336  
AT5G16540,AT3G02830 Poptr1|574054,Poptr1|742734  
AT3G12680 Poptr1|656369,Poptr1|724287  
AT1G48195  
AT5G63260,AT3G48440 Poptr1|733505,Poptr1|570198  
AT5G18550,AT3G06410 Poptr1|97654  
AT5G23520 Poptr1|573602  
AT3G24100 Poptr1|703025  
Poptr1|641924  
AT4G13615  
Poptr1|593291  
AT4G02780 Poptr1|346976,Poptr1|559559  
AT1G61120Poptr1|545037  
AT5G12120,AT2G26920 Poptr1|555103,Poptr1|547775,Poptr1|63815,Poptr1|54784  
AT4G21810,AT4G04860 Poptr1|555348,Poptr1|727410  
AT4G18890 Poptr1|555627  
Poptr1|55915,Poptr1|585501  
Poptr1|65543,Poptr1|711150  
AT3G50750 Poptr1|593971,Poptr1|563100  
AT1G78700  
AT1G19350,AT1G75080 Poptr1|551922,Poptr1|591830  
AT4G36780  
AT5G66490,AT3G50900,AT2G18210,AT2G18200,AT4G36500 Poptr1|655338  
AT4G28690,AT2G20310 Poptr1|553284  
Poptr1|556890  
AT5G20935  
AT5G35910,AT1G54440 Poptr1|58923  
AT5G25080 Poptr1|654245,Poptr1|669168  
Poptr1|589045  
AT5G26830,AT1G17960  
AT1G18130 Poptr1|686269  
AT2G04842 Poptr1|732407  
AT5G45500 Poptr1|568321  
Poptr1|573943  
AT2G37195 Poptr1|702736,Poptr1|576692  
Poptr1|650753  
AT3G48600,AT1G31760  
AT4G34290,AT2G14880 Poptr1|697374,Poptr1|549974  
Poptr1|71961  
AT2G35605  
AT3G03590 Poptr1|730132  
AT1G49520,AT3G19080 Poptr1|744225  
AT4G26810 Poptr1|575762  
AT2G14260 Poptr1|65336  
AT5G60600 Poptr1|703591,Poptr1|686925  
Poptr1|655828,Poptr1|563651,Poptr1|594854  
Poptr1|665683,Poptr1|574184,Poptr1|588034,Poptr1|748611,Poptr1|107078,Poptr1|729761,Poptr1|56365  
0,Poptr1|563652,Poptr1|353311,Poptr1|104143  
AT1G70170,AT1G24140,AT1G59970 Poptr1|570327,Poptr1|575433  
Poptr1|561771,Poptr1|561772,Poptr1|555557,Poptr1|568823,Poptr1|562741,Poptr1|582177,Poptr1|64852,  
Poptr1|64851  
AT4G16640

Poptr1|349737,Poptr1|589866  
AT2G45040 Poptr1|552000,Poptr1|591685  
AT1G75410,AT1G19700  
Poptr1|723473,Poptr1|640996  
AT1G75430 Poptr1|346768,Poptr1|559775  
AT4G32980  
AT2G27990 Poptr1|595088  
AT2G23760,AT4G36870 Poptr1|563081,Poptr1|651010  
AT2G35940 Poptr1|576501,Poptr1|717176  
AT4G34610,AT2G16400 Poptr1|546109,Poptr1|721939,Poptr1|346769  
AT5G02030 Poptr1|353606  
AT5G41410 Poptr1|63510,Poptr1|554402  
Poptr1|680041  
Poptr1|716797,Poptr1|577936  
AT2G27220  
Poptr1|105690  
AT3G17205 Poptr1|345179,Poptr1|566875  
Poptr1|353697  
Poptr1|687541,Poptr1|691832  
AT1G55860,AT1G70320  
Poptr1|684446  
Poptr1|735527  
Poptr1|652403,Poptr1|667133  
Poptr1|583776  
Poptr1|596153,Poptr1|596898,Poptr1|579075,Poptr1|551818,Poptr1|592006  
Poptr1|579392  
AT3G19480  
Poptr1|588204  
AT4G34200 Poptr1|691742,Poptr1|697350  
AT1G72190  
AT1G17745 Poptr1|563476,Poptr1|698762  
Poptr1|108883  
AT3G12670 Poptr1|345087  
Poptr1|108576,Poptr1|671453  
AT4G02120 Poptr1|688250  
Poptr1|711917  
AT2G34890,AT1G30820,AT4G20320  
AT5G09370  
AT5G13900 Poptr1|582710  
AT2G48130  
AT1G36150,AT4G08670 Poptr1|651320,Poptr1|643728  
AT2G48140 Poptr1|559579  
AT2G13820,AT5G64080 Poptr1|640777,Poptr1|712157  
AT3G43720  
Poptr1|643279  
AT2G27130 Poptr1|679864,Poptr1|649003  
AT3G22620 Poptr1|102259  
AT3G22570,AT3G22580  
AT1G05450  
AT1G27950  
AT4G14815,AT3G22600 Poptr1|651785,Poptr1|692849,Poptr1|690631,Poptr1|658506  
Poptr1|651786,Poptr1|692851,Poptr1|643280  
AT1G03103  
AT3G16700,AT4G15940 Poptr1|686969  
Poptr1|103588  
Poptr1|63848  
AT2G24280 Poptr1|578779  
AT5G22860,AT3G28680  
Poptr1|679732,Poptr1|101896,Poptr1|63841,Poptr1|677951,Poptr1|63835,Poptr1|63842,Poptr1|587010,Poptr1|591549,Poptr1|63846,Poptr1|705221,Poptr1|63837,Poptr1|697762  
AT5G65760 Poptr1|563326  
Poptr1|561993,Poptr1|576547,Poptr1|717872  
AT1G09430  
Poptr1|570673,Poptr1|744397  
AT1G10670,AT1G60810 Poptr1|658317,Poptr1|657522  
Poptr1|562845  
AT1G16445  
Poptr1|545912  
AT3G29310 Poptr1|577722  
AT5G54770 Poptr1|663350,Poptr1|666727,Poptr1|663351,Poptr1|727068,Poptr1|544685,Poptr1|47396  
Poptr1|552493  
AT1G06760 Poptr1|698025  
Poptr1|571057  
Poptr1|579186  
AT2G18050 Poptr1|655435,Poptr1|679169  
AT2G30620 Poptr1|559654,Poptr1|551082  
AT5G15802 Poptr1|690393  
AT1G30710,AT1G34575,AT2G34810,AT1G30720,AT1G30730  
AT1G30700 Poptr1|550583,Poptr1|103056,Poptr1|550584  
Poptr1|97281  
Poptr1|98114  
Poptr1|642619,Poptr1|679720

Poptr1|582607  
AT1G26410,AT1G26420,AT1G26390,AT1G26400,AT1G26380,AT4G20800  
Poptr1|550549,Poptr1|550550,Poptr1|65867,Poptr1|65868,Poptr1|569314,Poptr1|65870  
AT5G44390,AT5G44400,AT5G44380,AT2G34790,AT1G30760  
Poptr1|708080,Poptr1|569341,Poptr1|569344,Poptr1|677281,Poptr1|98184,Poptr1|582623,Poptr1|550594,  
Poptr1|65912,Poptr1|569342,Poptr1|550591,Poptr1|691944,Poptr1|582617,Poptr1|98177,Poptr1|582619,Poptr1|1016  
86,Poptr1|592105,Poptr1|592106,Poptr1|582609,Poptr1|592103,Poptr1|569345,Poptr1|582620,Poptr1|579721,Poptr1|  
594082,Poptr1|582610,Poptr1|739441,Poptr1|98171,Poptr1|582608,Poptr1|569448,Poptr1|580571  
Poptr1|98180  
AT5G44410,AT5G44440,AT4G20820  
Poptr1|672203,Poptr1|100286,Poptr1|98154,Poptr1|582593,Poptr1|582590,Poptr1|98159,Poptr1|98158,P  
optr1|582591,Poptr1|593092,Poptr1|593088,Poptr1|590917,Poptr1|550605,Poptr1|595287,Poptr1|550604,Poptr1|550  
579,Poptr1|65901,Poptr1|550576,Poptr1|569332,Poptr1|65903,Poptr1|65896,Poptr1|65893,Poptr1|550581,Poptr1|597  
710,Poptr1|569334,Poptr1|550587  
AT5G44360,AT4G20860 Poptr1|582604  
Poptr1|65979  
Poptr1|98151,Poptr1|569336,Poptr1|98153  
Poptr1|592104,Poptr1|582605,Poptr1|65919  
AT4G20830,AT4G20840,AT1G11770,AT1G01980,AT1G30740 Poptr1|687662,Poptr1|642620  
Poptr1|583826,Poptr1|590978,Poptr1|582615  
AT5G57420 Poptr1|580486  
AT1G67025,AT1G18380 Poptr1|580824,Poptr1|589686,Poptr1|589688,Poptr1|589692,Poptr1|566578  
AT1G77750 Poptr1|643670  
AT5G14320 Poptr1|559187,Poptr1|684496  
Poptr1|545379  
AT4G33390  
AT1G12150 Poptr1|560092  
AT5G55860 Poptr1|550223  
AT1G45545,AT5G42880  
Poptr1|71977  
AT2G26570 Poptr1|644128,Poptr1|740380  
AT3G13190  
AT4G17210  
Poptr1|581386  
AT2G29980 Poptr1|706000  
AT3G11170,AT5G05580 Poptr1|686440,Poptr1|724443  
Poptr1|48459,Poptr1|639715  
AT3G12120 Poptr1|576263,Poptr1|561258  
Poptr1|701622,Poptr1|695375  
Poptr1|644693,Poptr1|644690,Poptr1|672103,Poptr1|664218  
AT2G46880,AT5G63140  
AT5G57140 Poptr1|351660,Poptr1|351662,Poptr1|579020  
AT2G42490  
Poptr1|575226,Poptr1|570122,Poptr1|726236  
Poptr1|588560  
AT3G45950 Poptr1|354577  
Poptr1|345865,Poptr1|57503  
AT4G37120,AT1G65660  
AT3G52430 Poptr1|562519,Poptr1|558462  
AT5G03900 Poptr1|714116  
AT3G28880 Poptr1|545762  
AT3G04710 Poptr1|595410,Poptr1|699844  
AT5G14970  
AT2G14910 Poptr1|642054  
AT3G59050,AT2G43020 Poptr1|692822,Poptr1|685354  
AT1G65840 Poptr1|592873,Poptr1|693842  
AT1G52155 Poptr1|64050  
AT5G20635 Poptr1|675860,Poptr1|668727  
AT2G45280 Poptr1|572093  
AT1G48870 Poptr1|562422  
AT5G02430  
AT3G15470 Poptr1|55976,Poptr1|579499  
AT1G64610,AT5G42010 Poptr1|343712,Poptr1|709083  
AT2G37670 Poptr1|344239  
AT5G53500,AT5G24320 Poptr1|355320,Poptr1|684310  
AT5G54200  
AT5G35110,AT2G46490 Poptr1|561281,Poptr1|578807,Poptr1|578808,Poptr1|561280,Poptr1|578809  
AT5G17210  
Poptr1|689226  
AT3G09630,AT5G02870 Poptr1|589385,Poptr1|739313,Poptr1|585837,Poptr1|576639  
AT5G22580 Poptr1|679804,Poptr1|676240,Poptr1|649096  
AT4G21110,Poptr1|741620,Poptr1|649108  
AT1G64770 Poptr1|702428,Poptr1|571212  
Poptr1|578086  
AT4G32770 Poptr1|561762  
AT3G13882 Poptr1|689656  
AT5G67570 Poptr1|76499  
AT1G30610 Poptr1|107216,Poptr1|550557  
AT4G26020 Poptr1|579018  
AT3G16310 Poptr1|683768  
AT1G63780 Poptr1|708527,Poptr1|647273  
AT3G27740 Poptr1|739894,Poptr1|553916



Poptr1|583536  
Poptr1|645228  
AT5G16620 Poptr1|693876  
AT4G13540,AT3G23930 Poptr1|696346,Poptr1|658105  
AT2G18910 Poptr1|580504,Poptr1|669427  
AT3G28990,AT3G55240  
Poptr1|565187,Poptr1|658321  
AT5G04090,AT3G10250 Poptr1|701326,Poptr1|685823  
AT2G46420 Poptr1|731327,Poptr1|692361  
AT5G02580 Poptr1|561508  
Poptr1|700806,Poptr1|355230,Poptr1|569503  
AT3G61700  
Poptr1|64002  
Poptr1|581462  
AT1G15240 Poptr1|343352,Poptr1|64001  
AT2G15900 Poptr1|722154  
AT1G25275 Poptr1|666826,Poptr1|666830,Poptr1|591429,Poptr1|575561  
AT3G24430  
Poptr1|578419  
AT4G19540 Poptr1|559659,Poptr1|710927  
AT2G18960,AT4G30190,AT5G57350 Poptr1|689125,Poptr1|743411  
AT2G24520 Poptr1|98440,Poptr1|737524  
Poptr1|640486  
AT1G17260 Poptr1|702851  
AT5G62670,AT3G47950 Poptr1|575053,Poptr1|699453  
AT2G07560,AT3G42640 Poptr1|578793,Poptr1|344473,Poptr1|351145  
AT3G60330 Poptr1|349771,Poptr1|591788  
AT4G11730  
AT1G80660 Poptr1|63049,Poptr1|554857,Poptr1|72564  
AT5G46560 Poptr1|591640,Poptr1|589966  
AT1G56230 Poptr1|699712  
Poptr1|579786,Poptr1|581912  
AT5G64630 Poptr1|562443  
AT5G20310 Poptr1|584570,Poptr1|351708  
AT5G57850  
Poptr1|668923  
Poptr1|687591  
Poptr1|561775  
AT3G42860 Poptr1|65066  
Poptr1|726887  
AT2G01440 Poptr1|656910  
AT4G08455 Poptr1|72516  
AT1G01210,AT4G07950 Poptr1|569559  
Poptr1|350879  
AT3G27890 Poptr1|555056,Poptr1|690866  
Poptr1|63001,Poptr1|547903  
Poptr1|344834  
AT5G21120  
Poptr1|559099,Poptr1|547902  
AT5G65100,AT5G10120  
AT1G73730  
AT2G27050,AT3G20770 Poptr1|556850,Poptr1|741749  
Poptr1|556145  
Poptr1|743706  
AT1G18700  
AT2G25870 Poptr1|561723,Poptr1|577915  
Poptr1|668865,Poptr1|736952  
AT1G74530  
AT3G26900 Poptr1|703893  
Poptr1|347063  
AT2G21940,AT4G39540 Poptr1|558622,Poptr1|695927  
Poptr1|593288  
AT1G21695  
AT1G77400 Poptr1|651446  
Poptr1|722007,Poptr1|712986  
Poptr1|557243  
Poptr1|556479  
AT2G21620  
AT2G17550 Poptr1|716171  
AT4G10955,AT2G05260 Poptr1|63415,Poptr1|554502  
AT5G24220,AT5G24180,AT5G24190,AT5G24210,AT5G24200,AT5G24230  
AT3G25690  
AT4G18570 Poptr1|545202,Poptr1|687570  
AT1G48280 Poptr1|725566  
AT4G04980,AT1G11070 Poptr1|65075  
AT1G07120 Poptr1|49107,Poptr1|697448  
Poptr1|65878,Poptr1|569320  
Poptr1|658955,Poptr1|723812  
Poptr1|572916  
AT5G63920 Poptr1|71557  
Poptr1|572917  
AT2G32000

AT5G39410 Poptr1|556357  
AT2G30350 Poptr1|580699,Poptr1|571891  
Poptr1|586864  
AT5G09520,AT5G09530  
Poptr1|75540,Poptr1|577339,Poptr1|577319,Poptr1|577327,Poptr1|75539,Poptr1|75541,Poptr1|681000,P  
optr1|103014,Poptr1|562389  
AT2G22510,AT4G38080  
AT5G57130  
Poptr1|735269  
AT4G29920 Poptr1|344193  
AT3G52490 Poptr1|352444  
Poptr1|563549  
AT5G42765 Poptr1|700726  
AT5G36210 Poptr1|347680  
AT5G36120 Poptr1|643415,Poptr1|651643  
AT5G18850 Poptr1|657950,Poptr1|657618  
Poptr1|584901,Poptr1|107725,Poptr1|99462,Poptr1|591598,Poptr1|550343,Poptr1|559043,Poptr1|568120,  
Poptr1|579144,Poptr1|558174  
Poptr1|63404  
AT5G66720  
AT2G30170 Poptr1|691531  
AT4G16580 Poptr1|655270,Poptr1|593962,Poptr1|591821  
AT4G33500  
AT1G67623 Poptr1|570715,Poptr1|65038  
AT5G04610 Poptr1|567982,Poptr1|576909,Poptr1|556165,Poptr1|106636,Poptr1|597211  
Poptr1|592738  
Poptr1|684608,Poptr1|651908  
AT2G31140,AT1G06200  
AT4G15510 Poptr1|47540,Poptr1|48201  
AT1G01860 Poptr1|572185  
AT3G48930,AT5G23740,AT4G30800 Poptr1|677637,Poptr1|681942,Poptr1|738092  
Poptr1|560063  
AT1G72090 Poptr1|592285  
AT5G42390 Poptr1|692108,Poptr1|732164,Poptr1|661627  
Poptr1|654906,Poptr1|51756  
AT4G39450 Poptr1|654905  
AT1G13400,AT1G68480 Poptr1|564534,Poptr1|656820  
AT4G32350 Poptr1|578455  
AT1G79910 Poptr1|590233,Poptr1|102937,Poptr1|349561,Poptr1|63983  
AT1G52315  
Poptr1|696961  
AT3G54826  
AT5G49210 Poptr1|671378,Poptr1|549808  
Poptr1|589748,Poptr1|669049  
Poptr1|550827,Poptr1|559891  
Poptr1|560605,Poptr1|99180,Poptr1|584474,Poptr1|349227  
AT4G35790 Poptr1|346329,Poptr1|99779  
Poptr1|691169  
AT4G11850,AT4G11840,AT4G11830  
AT1G52570,AT3G15730 Poptr1|48920,Poptr1|59592  
AT5G25370 Poptr1|344732  
Poptr1|578949  
AT1G55180  
AT4G00240,AT2G42010 Poptr1|730958,Poptr1|347907  
AT3G26060 Poptr1|736741,Poptr1|589333  
AT1G33520,AT4G25020 Poptr1|590128,Poptr1|349999  
AT1G33290  
Poptr1|568618  
AT3G10420 Poptr1|725076  
Poptr1|65581  
AT1G73170 Poptr1|65582  
AT1G20225,AT1G76020 Poptr1|692998,Poptr1|715538  
AT5G02750 Poptr1|352556,Poptr1|576622  
AT1G08550 Poptr1|663034  
Poptr1|573878  
AT5G61150Poptr1|345873  
Poptr1|586984,Poptr1|572629  
Poptr1|551554  
AT5G10560 Poptr1|691069  
Poptr1|107790  
Poptr1|99254  
Poptr1|562383  
AT5G49360 Poptr1|719981,Poptr1|687214  
AT5G09700,AT5G09730,AT5G64570 Poptr1|548785,Poptr1|553472,Poptr1|586987,Poptr1|107561  
AT1G02640  
Poptr1|559132  
Poptr1|572630,Poptr1|348334,Poptr1|348335  
AT3G19620 Poptr1|65281  
AT1G78060 Poptr1|551555,Poptr1|72359  
AT3G59490 Poptr1|703463  
AT1G18335 Poptr1|670746,Poptr1|580634,Poptr1|569381  
Poptr1|574868

AT5G61200 Poptr1|574869  
AT5G01290,AT3G09100,AT5G28210 Poptr1|735714,Poptr1|667975,Poptr1|351872  
AT4G18230  
Poptr1|348076,Poptr1|691538  
AT5G10580  
Poptr1|574619,Poptr1|106515,Poptr1|592264  
AT3G18215  
AT5G43180 Poptr1|688871  
Poptr1|586058  
AT5G46060  
Poptr1|65551  
AT5G24790  
AT5G24600  
AT4G31330 Poptr1|745339  
AT3G50820,AT5G66570 Poptr1|719397,Poptr1|685218  
AT4G37230  
AT3G56940 Poptr1|351324,Poptr1|47766  
Poptr1|686073,Poptr1|573576,Poptr1|563106,Poptr1|592526,Poptr1|573571,Poptr1|586460  
AT4G36760  
Poptr1|674602,Poptr1|563107  
AT3G05350 Poptr1|570832  
AT5G59860  
Poptr1|697163,Poptr1|713396  
AT5G42210 Poptr1|693002,Poptr1|715555  
Poptr1|586243  
Poptr1|353264,Poptr1|698806  
AT4G20030 Poptr1|553852  
AT2G16980,AT2G16970,AT2G16990  
AT3G20930 Poptr1|353265  
AT3G21400 Poptr1|565733,Poptr1|744470  
AT5G49555 Poptr1|686087  
Poptr1|567223  
AT5G05460,AT3G11040 Poptr1|353724  
AT3G61010 Poptr1|564076  
Poptr1|659457  
AT5G44930  
AT1G67410  
AT1G34270  
AT1G74680 Poptr1|664483,Poptr1|573460  
AT2G35100 Poptr1|346145,Poptr1|57742  
Poptr1|567667,Poptr1|344882  
AT3G03650,AT3G45400 Poptr1|680256,Poptr1|738592,Poptr1|662384  
AT5G16890 Poptr1|738369  
AT4G32840  
AT2G22480 Poptr1|719787  
AT5G47810  
Poptr1|596908,Poptr1|560067  
AT4G26270,AT5G56630 Poptr1|653318,Poptr1|745172  
AT4G29220  
Poptr1|675646  
AT5G61580 Poptr1|588766,Poptr1|691024  
Poptr1|695057  
Poptr1|582324  
Poptr1|651974,Poptr1|710803  
AT4G03320 Poptr1|580353  
AT1G08910,AT5G41580 Poptr1|350281  
AT3G12080  
Poptr1|557847  
AT3G15620 Poptr1|349500  
AT4G04614 Poptr1|559588  
AT5G24410,AT3G49360,AT5G24420  
AT1G13700 Poptr1|720875,Poptr1|659198  
Poptr1|675499,Poptr1|355377,Poptr1|732797,Poptr1|569602,Poptr1|574689,Poptr1|661605,Poptr1|589174,Poptr1|574688  
AT5G24400  
Poptr1|105856  
AT2G22370 Poptr1|718747  
AT5G08300,AT5G23250 Poptr1|594147,Poptr1|704089,Poptr1|694368  
Poptr1|580594,Poptr1|728806  
Poptr1|585783  
AT5G47790 Poptr1|582313,Poptr1|560078  
Poptr1|563968,Poptr1|567326  
AT2G37975 Poptr1|576905  
Poptr1|569406  
Poptr1|580650  
AT1G48420  
AT5G62060,AT1G32420,AT3G56670,AT5G50220,AT1G52480,AT1G52490,AT5G62510,AT5G62660,AT2G40920,AT2G40910,AT2G40925,AT4G19930,AT4G19940,AT2G16810,AT3G52510,AT3G52320,AT3G52330,AT3G47140,AT3G47130,AT3G47150,AT3G06280,AT2G33705,AT1G59690,AT5G43550,AT5G22791,AT2G32470,AT1G32660,AT1G30790,AT1G30780,AT2G13630,AT3G04660,AT4G29970,AT3G10790,AT1G71290,AT1G70960,AT1G70380,AT1G70970,AT1G70390,AT1G76830,AT1G47810,AT1G47800,AT5G15670,AT5G15660,AT1G26510,AT4G11590,AT1G31000,AT1G19160,AT5G52610,AT2G21930,AT4G38870,AT5G44220,AT1G47765,AT1G47790,AT3G10240,AT1G48060,AT1G47730,

AT1G50870,AT1G50880,AT4G09190,AT5G18160,AT1G59675,AT4G21240,AT4G13060,AT1G53370,AT1G53360,AT1G53790,AT3G10990,AT3G23960,AT2G31470,AT2G19630,AT5G65850,AT3G47020,AT3G47030,AT3G49440,AT3G49450,AT3G61340,AT1G47350,AT1G47340,AT2G15640,AT2G16450,AT2G16220,AT2G02890,AT2G02660,AT2G23160,AT1G47300,AT1G60370,AT1G33010,AT1G33020,AT1G67130,AT3G56890,AT3G57580,AT3G57590,AT1G30930,AT5G52620,AT1G31090,AT1G31080,AT1G30920,AT5G42430,AT5G38810,AT1G31163,AT1G53815,AT1G53550,AT1G61060,AT1G55070,AT1G46840,AT1G46984,AT5G44345,AT1G46912 Poptr1|564749  
AT4G14147 Poptr1|597053  
AT5G65860 Poptr1|689599  
AT3G55480 Poptr1|724688  
AT2G39630 Poptr1|696859,Poptr1|659690  
AT1G23000 Poptr1|656894,Poptr1|566516  
Poptr1|572828  
AT4G23882 Poptr1|549738,Poptr1|557151  
AT3G05220 Poptr1|595577  
AT3G06130,AT5G19090 Poptr1|345601  
AT3G04900  
Poptr1|97486  
AT5G27690 Poptr1|572720,Poptr1|573429  
AT1G56210 Poptr1|581872  
Poptr1|659438  
Poptr1|565726  
AT1G30473  
AT5G37860  
Poptr1|555928  
Poptr1|583835,Poptr1|583836,Poptr1|583834  
Poptr1|568115  
Poptr1|686800  
AT2G30000  
Poptr1|641472  
AT1G07170 Poptr1|649849,Poptr1|706560  
AT5G43600 Poptr1|698021  
AT1G49310 Poptr1|697286,Poptr1|694154  
AT1G04770  
Poptr1|681760,Poptr1|554834  
AT3G51280 Poptr1|553984,Poptr1|553985,Poptr1|346355  
AT5G44330,AT4G20900  
AT5G48850 Poptr1|586693,Poptr1|348950  
AT1G49940  
Poptr1|582584,Poptr1|550608,Poptr1|558053  
Poptr1|56983,Poptr1|552084  
AT3G61050  
AT3G61030,AT3G60950 Poptr1|591418  
AT5G13830 Poptr1|687353  
AT5G16790,AT3G02950 Poptr1|571435  
AT5G63135 Poptr1|570129  
AT3G04800  
AT1G72750,AT1G17530 Poptr1|597661,Poptr1|681658,Poptr1|553535  
Poptr1|662902,Poptr1|595440  
AT5G57460 Poptr1|595995,Poptr1|580474  
AT2G37920 Poptr1|576859,Poptr1|653038  
AT1G19490 Poptr1|589581  
AT2G18110,AT1G30230  
AT5G12110,AT5G19510 Poptr1|558203,Poptr1|548694  
AT2G18070  
Poptr1|648088,Poptr1|645286  
AT1G70770,AT1G23170,AT3G11880 Poptr1|564636,Poptr1|566476  
AT3G58790  
AT3G01040,AT5G15470 Poptr1|556346,Poptr1|577718  
AT4G38270 Poptr1|580067,Poptr1|595004  
Poptr1|663863,Poptr1|663862  
AT2G38650 Poptr1|577255,Poptr1|589584  
AT2G20810 Poptr1|595258,Poptr1|663529  
AT2G46480  
Poptr1|589810  
AT5G54690 Poptr1|569069,Poptr1|699993  
AT3G02350 Poptr1|580724,Poptr1|590338,Poptr1|670944  
AT1G18580 Poptr1|597521  
AT2G30575,AT1G06780 Poptr1|346896,Poptr1|685378  
Poptr1|563480  
AT3G25140 Poptr1|349007  
AT3G61130Poptr1|342718,Poptr1|663861  
AT5G47780 Poptr1|560055,Poptr1|744810  
Poptr1|661826,Poptr1|581394  
AT3G05000 Poptr1|595512,Poptr1|570929  
AT2G18870 Poptr1|669286  
Poptr1|347522  
AT3G24440  
AT5G57380  
AT2G18880,AT4G30200 Poptr1|704063  
Poptr1|669285  
Poptr1|99612  
AT4G26370 Poptr1|712227

AT1G04130 Poptr1|573382,Poptr1|553283  
AT1G08680 Poptr1|730096  
AT5G51020 Poptr1|570374  
AT2G04795,AT5G35732 Poptr1|573055,Poptr1|645017  
AT4G28760,AT2G20240 Poptr1|349070,Poptr1|573393  
Poptr1|349071  
AT5G43880  
AT3G53540 Poptr1|576601,Poptr1|352528  
AT1G06500 Poptr1|551239  
Poptr1|563372  
AT4G31130Poptr1|704660,Poptr1|688965  
Poptr1|581338,Poptr1|57266  
AT3G02060 Poptr1|102221,Poptr1|553109  
AT1G48240,AT3G17440 Poptr1|725534  
AT2G35190 Poptr1|739850,Poptr1|580146  
AT3G03360,AT1G49610,AT3G18150,AT2G39415,AT1G60180,AT1G57690,AT5G02920,AT5G02930,AT5G02910,AT5  
G02700,AT3G28410,AT5G03100 Poptr1|65022  
AT3G20920 Poptr1|697548,Poptr1|706273  
AT5G22100 Poptr1|650409,Poptr1|548989  
AT1G04070,AT5G43970 Poptr1|692003  
AT2G29210 Poptr1|641151  
Poptr1|691382,Poptr1|558022  
Poptr1|106440  
Poptr1|558853,Poptr1|562994,Poptr1|65068  
AT5G66820  
AT2G41610 Poptr1|731485  
AT2G20490 Poptr1|651920,Poptr1|643131  
AT4G32175,AT2G25355 Poptr1|575149,Poptr1|699425  
Poptr1|672284,Poptr1|580407,Poptr1|732571  
AT3G25520,AT5G39740  
Poptr1|572565  
AT1G21350 Poptr1|710970  
Poptr1|55150  
AT5G27520,AT3G05290 Poptr1|595594,Poptr1|699760  
Poptr1|556116  
AT4G18975 Poptr1|727885  
AT5G22370  
Poptr1|551778,Poptr1|730763  
AT2G30120 Poptr1|578679,Poptr1|584888  
AT3G14750 Poptr1|707867  
AT1G67170 Poptr1|580750  
AT5G61920 Poptr1|653642  
AT1G55170  
Poptr1|64695,Poptr1|557622  
AT5G61930 Poptr1|733784  
AT3G21740 Poptr1|594465  
AT5G57930 Poptr1|561339,Poptr1|578739  
AT1G64810 Poptr1|582335  
AT3G52300 Poptr1|724897,Poptr1|655958  
AT1G49000,AT3G18560 Poptr1|566681,Poptr1|687756  
AT3G57000 Poptr1|667309,Poptr1|560400  
Poptr1|572908  
Poptr1|553081  
AT4G18920,AT5G45690,AT1G29680  
AT2G31985,AT1G05510  
AT1G16350,AT1G79470 Poptr1|564166,Poptr1|592398,Poptr1|656401  
AT2G01860 Poptr1|73165  
Poptr1|578444  
Poptr1|578445,Poptr1|705276  
AT4G14900,AT3G22440 Poptr1|657165  
AT2G12462 Poptr1|672956  
AT1G80520,AT1G15760 Poptr1|640829,Poptr1|592679  
Poptr1|57075  
AT1G64300,AT5G41730 Poptr1|554461  
AT1G01450  
AT5G01460,AT3G08930 Poptr1|560909,Poptr1|701613  
AT1G01880 Poptr1|663900  
Poptr1|552106  
AT1G52330 Poptr1|349557,Poptr1|63791  
AT4G13270 Poptr1|690404  
AT4G15765,AT4G15760  
Poptr1|556660,Poptr1|595923  
Poptr1|105596,Poptr1|546255  
AT2G35660,AT2G29720 Poptr1|702874  
Poptr1|349787  
AT5G05320,AT4G38540  
Poptr1|549884,Poptr1|595906,Poptr1|595907,Poptr1|102770,Poptr1|580001,Poptr1|589598  
AT1G55480 Poptr1|639608,Poptr1|639609,Poptr1|712717  
AT2G48080  
Poptr1|584991  
AT4G02940 Poptr1|584989,Poptr1|584994,Poptr1|572798  
AT3G24560 Poptr1|578472

AT5G16010 Poptr1|748570,Poptr1|563512,Poptr1|563510,Poptr1|697019,Poptr1|698774,Poptr1|353192  
AT5G57900,AT4G30640 Poptr1|702232  
AT1G09330 Poptr1|744441,Poptr1|570691  
Poptr1|572573  
AT5G59500 Poptr1|650244,Poptr1|64360  
AT4G14110Poptr1|553463,Poptr1|705673  
AT5G04190 Poptr1|558667,Poptr1|75922  
AT1G74970 Poptr1|644182,Poptr1|740273  
AT5G60340 Poptr1|561658,Poptr1|699334  
Poptr1|724072  
AT2G03420  
AT5G26670,AT3G05910 Poptr1|662513,Poptr1|581591  
AT3G62060,AT2G46930 Poptr1|572510  
AT3G09410 Poptr1|344241  
AT1G09550,AT1G57590  
AT4G19410,AT5G45280 Poptr1|553558,Poptr1|703824  
AT5G23870 Poptr1|575835,Poptr1|728572  
Poptr1|552413,Poptr1|568313,Poptr1|697795  
AT4G19420 Poptr1|596845  
AT2G01720 Poptr1|341836  
AT1G76400 Poptr1|550740,Poptr1|559983  
AT3G17590 Poptr1|725576  
AT4G21180,AT1G79940 Poptr1|556117,Poptr1|689677  
AT3G18370 Poptr1|729121  
AT1G73120 Poptr1|698765,Poptr1|679459  
AT5G58575 Poptr1|649823,Poptr1|641504  
AT1G68590 Poptr1|564512,Poptr1|698251  
AT5G15760 Poptr1|555842  
AT1G67270,AT1G67780,AT5G38690 Poptr1|352955  
AT1G78930 Poptr1|563386  
AT1G76750 Poptr1|557620,Poptr1|585118,Poptr1|100343  
Poptr1|549891  
AT1G66680 Poptr1|744154  
AT3G52030 Poptr1|557824  
Poptr1|595471  
AT5G27970 Poptr1|595470,Poptr1|56621  
AT5G46890,AT5G46900,AT2G45180 Poptr1|582732  
AT1G62500 Poptr1|646444  
AT4G12490,AT4G12500,AT4G12470,AT4G12480,AT4G12510,AT4G12520  
AT4G00165  
AT1G12100 Poptr1|671231  
AT4G22490  
AT4G22610,AT4G22520  
AT2G10940 Poptr1|560570  
AT4G12545,AT4G12550,AT4G22460  
Poptr1|654168,Poptr1|702027  
AT1G12090,AT1G62510 Poptr1|346174,Poptr1|554199,Poptr1|690153  
AT4G12530  
Poptr1|680987,Poptr1|685875,Poptr1|560136  
AT5G03555 Poptr1|589526  
AT5G40740 Poptr1|581731,Poptr1|691610  
Poptr1|350706  
AT1G80680  
Poptr1|63046  
AT3G50380 Poptr1|563057  
AT3G54290 Poptr1|353243  
AT1G72040 Poptr1|593394,Poptr1|592271,Poptr1|574262  
Poptr1|579730,Poptr1|590780,Poptr1|594796,Poptr1|554974,Poptr1|580457,Poptr1|350275,Poptr1|57990  
7,Poptr1|580709,Poptr1|596163,Poptr1|104353,Poptr1|591413,Poptr1|594143,Poptr1|107036,Poptr1|587167,Poptr1|5  
87520,Poptr1|577015,Poptr1|583216,Poptr1|581734,Poptr1|585312,Poptr1|597726,Poptr1|351671,Poptr1|580668,Pop  
ptr1|578324,Poptr1|585818,Poptr1|580287,Poptr1|584632,Poptr1|561245,Poptr1|595719,Poptr1|582187,Poptr1|5821  
88,Poptr1|594149,Poptr1|575150,Poptr1|691123,Poptr1|350254  
AT1G75060,AT1G19330 Poptr1|644195,Poptr1|740258  
AT3G51030 Poptr1|563225  
Poptr1|710146,Poptr1|651991  
AT1G31020,AT2G35010 Poptr1|589850  
AT5G39950 Poptr1|701805  
Poptr1|559783  
AT1G11530Poptr1|727798,Poptr1|647677,Poptr1|730316  
AT1G69880,AT1G59730 Poptr1|565241  
AT5G42980,AT1G45145  
Poptr1|57548,Poptr1|699533  
AT4G22670 Poptr1|60475,Poptr1|646478  
Poptr1|583101  
AT5G16400,AT3G02730 Poptr1|683140  
AT3G53220 Poptr1|676071  
AT3G56420,AT2G40790 Poptr1|581081  
AT3G08710 Poptr1|701694,Poptr1|695349  
AT1G19730  
AT3G17880  
AT5G13260 Poptr1|708819,Poptr1|684802  
AT5G23700,AT3G48860

Poptr1|575441  
Poptr1|575442  
AT4G08630  
AT4G25070  
Poptr1|687636,Poptr1|49474  
AT2G17370 Poptr1|595031,Poptr1|686577  
AT1G76490 Poptr1|671577,Poptr1|693044,Poptr1|694924  
AT5G45930,AT4G18480 Poptr1|699049,Poptr1|555713  
AT4G02250,AT1G55770 Poptr1|555333,Poptr1|590151  
AT5G13220 Poptr1|576730,Poptr1|570809,Poptr1|548076,Poptr1|712551  
AT5G20600 Poptr1|345685  
AT5G01010 Poptr1|589587,Poptr1|734436  
AT3G51800 Poptr1|560930,Poptr1|577003  
Poptr1|577797  
AT5G49510 Poptr1|687229,Poptr1|564372  
AT4G16700 Poptr1|343414  
AT5G03280 Poptr1|58107,Poptr1|702739  
AT3G07180 Poptr1|105775,Poptr1|692067  
Poptr1|574638  
Poptr1|578280  
Poptr1|666031  
AT5G45140  
AT3G18090,AT3G23780 Poptr1|737361  
Poptr1|353018  
AT1G29940 Poptr1|547797  
AT4G21710  
Poptr1|713972  
AT5G08410,AT5G23440 Poptr1|725186,Poptr1|563410  
AT5G64620 Poptr1|75589  
AT4G16144  
AT1G48790 Poptr1|569810,Poptr1|732998  
AT1G10600 Poptr1|687064  
AT2G35120 Poptr1|570626  
AT2G35370,AT1G32470 Poptr1|676524,Poptr1|580100  
AT4G39820 Poptr1|558569  
AT5G56120 Poptr1|672146,Poptr1|642694  
AT3G12870 Poptr1|650934  
Poptr1|584950,Poptr1|597195  
AT5G08530  
Poptr1|565060,Poptr1|565894  
AT5G63460 Poptr1|570248,Poptr1|666655  
Poptr1|683945  
AT5G61410 Poptr1|744163  
AT3G01850,AT1G63290  
AT4G19080  
Poptr1|355324,Poptr1|355323,Poptr1|562289  
AT5G45460 Poptr1|591937  
Poptr1|581737  
Poptr1|351186  
Poptr1|591935  
Poptr1|593062,Poptr1|575553,Poptr1|575539,Poptr1|105513,Poptr1|593170,Poptr1|575474,Poptr1|57553  
5,Poptr1|575557,Poptr1|586650,Poptr1|592421,Poptr1|593255,Poptr1|107342,Poptr1|575556,Poptr1|592966,Poptr1|5  
75554,Poptr1|102101,Poptr1|102102,Poptr1|593258,Poptr1|595763,Poptr1|596412,Poptr1|581409,Poptr1|575537,Pop  
tr1|593256,Poptr1|102168,Poptr1|593257,Poptr1|102100  
Poptr1|105448,Poptr1|105768,Poptr1|591934  
AT4G19090  
Poptr1|591936  
Poptr1|76293  
Poptr1|592150,Poptr1|560174,Poptr1|593172  
Poptr1|351190,Poptr1|351189,Poptr1|351185,Poptr1|575935,Poptr1|568018,Poptr1|351205,Poptr1|560169  
,Poptr1|593538,Poptr1|351207,Poptr1|560168,Poptr1|560167,Poptr1|351201,Poptr1|553623  
AT5G45530,AT5G45470,AT5G45480,AT5G45540 Poptr1|101932  
AT4G01880 Poptr1|711436  
Poptr1|720591  
AT5G05740 Poptr1|567290  
Poptr1|580631  
AT3G58130,AT2G27340 Poptr1|345662  
AT1G76200  
Poptr1|670703,Poptr1|642843  
Poptr1|596220,Poptr1|58417,Poptr1|648542  
AT5G15540 Poptr1|556404  
Poptr1|551324,Poptr1|559371  
AT1G21190,AT1G76860  
Poptr1|571402  
AT5G16690 Poptr1|571401  
AT1G76480,AT1G20890 Poptr1|561718  
AT2G29960  
Poptr1|51837,Poptr1|76144  
AT4G34870  
Poptr1|687317  
AT4G34960 Poptr1|557096,Poptr1|713277  
AT3G44600 Poptr1|721509

AT3G56070  
AT2G36130 Poptr1|671129,Poptr1|735314  
AT4G33060 Poptr1|352647,Poptr1|668739  
AT2G38730 Poptr1|679335,Poptr1|555070  
AT3G62030 Poptr1|572508,Poptr1|710084  
AT5G67530 Poptr1|51890  
AT2G15790 Poptr1|744234,Poptr1|54489  
AT5G58710 Poptr1|588781,Poptr1|46322,Poptr1|723045  
AT3G22920  
AT4G32420 Poptr1|737158,Poptr1|344719  
Poptr1|665273,Poptr1|738193,Poptr1|665264  
AT5G13120  
AT4G38740,AT2G21130,AT2G16600 Poptr1|550879,Poptr1|652085,Poptr1|556595,Poptr1|697207  
Poptr1|554741,Poptr1|640072  
AT1G01940 Poptr1|730901,Poptr1|552068  
Poptr1|670501,Poptr1|107483,Poptr1|584929  
AT3G55920  
AT3G63400 Poptr1|643241,Poptr1|643242,Poptr1|651824  
AT2G35290 Poptr1|676545,Poptr1|670403  
AT5G11270Poptr1|578185,Poptr1|561871,Poptr1|596244  
AT2G30230,AT1G06980 Poptr1|688079,Poptr1|665963  
AT1G29195 Poptr1|555673,Poptr1|568712  
AT4G02740,AT4G02760,AT4G02733 Poptr1|651770,Poptr1|551163  
AT3G54740  
AT3G11850,AT5G06560 Poptr1|695277,Poptr1|735173  
AT5G57830,AT4G30830  
AT2G18860,AT4G30240 Poptr1|670618,Poptr1|578603  
AT1G27700 Poptr1|703166  
AT2G25910 Poptr1|561708  
Poptr1|580458  
AT1G20020  
AT5G66190 Poptr1|693589,Poptr1|593837  
AT1G30510,AT4G05390 Poptr1|707738  
Poptr1|552549  
AT3G63310  
Poptr1|551136,Poptr1|559596  
AT4G14730 Poptr1|564874  
AT4G15470 Poptr1|657636,Poptr1|565676  
AT4G02690,AT1G03070 Poptr1|685365,Poptr1|710634  
AT5G41140,AT1G63300 Poptr1|646586,Poptr1|63566  
Poptr1|667027,Poptr1|356236  
AT5G52280 Poptr1|595964,Poptr1|575817  
AT1G21690  
Poptr1|595126,Poptr1|651448  
AT3G01790 Poptr1|641767,Poptr1|668417  
AT5G54850 Poptr1|569107,Poptr1|700010  
AT2G36250,AT3G52750 Poptr1|594979,Poptr1|721303,Poptr1|717445  
AT5G55280 Poptr1|691804  
AT5G52650,AT4G25740,AT5G41520 Poptr1|595542,Poptr1|544727,Poptr1|570901,Poptr1|703325  
AT3G25880  
AT1G05180,AT2G32410 Poptr1|684210  
AT1G69200 Poptr1|353948  
AT3G54090 Poptr1|576906  
Poptr1|644371,Poptr1|572153  
AT5G51830 Poptr1|575736,Poptr1|570537  
AT1G66430 Poptr1|692132,Poptr1|546499  
AT4G10260 Poptr1|97278  
Poptr1|588252,Poptr1|348814  
AT1G50390,AT1G06030,AT1G06020,AT2G31390,AT3G59480 Poptr1|106882,Poptr1|741473,Poptr1|562225  
AT5G48690 Poptr1|561295,Poptr1|645437  
AT1G04850 Poptr1|683978,Poptr1|577444  
AT3G01130,AT5G15320 Poptr1|643001,Poptr1|694830,Poptr1|557158,Poptr1|546154  
AT1G28760 Poptr1|573969,Poptr1|730053  
Poptr1|573970  
AT5G67610,AT3G49840  
Poptr1|663677,Poptr1|571980,Poptr1|593535,Poptr1|76494,Poptr1|595136,Poptr1|700110,Poptr1|571997  
AT5G58250  
Poptr1|729291  
AT2G41705 Poptr1|347286,Poptr1|72431  
AT1G04860,AT2G32780 Poptr1|65088,Poptr1|577426  
AT2G45070,AT3G60540 Poptr1|591674,Poptr1|552006  
AT5G60460 Poptr1|697734  
AT3G28610,AT3G28600,AT5G40000,AT3G28570  
AT4G05340  
Poptr1|544780  
AT4G30250  
AT5G57480,AT4G25835 Poptr1|670616,Poptr1|578605  
Poptr1|98544,Poptr1|558143  
AT2G46620 Poptr1|552311,Poptr1|572434  
Poptr1|356944  
Poptr1|568817  
Poptr1|563206,Poptr1|555289,Poptr1|597544,Poptr1|356895,Poptr1|563281,Poptr1|568818,Poptr1|98355



AT2G18190,AT2G18193 Poptr1|719571,Poptr1|563200  
Poptr1|555294,Poptr1|592422  
AT1G43910 Poptr1|563207,Poptr1|593897  
AT4G05380 Poptr1|555295  
AT4G05370 Poptr1|64198  
Poptr1|732815,Poptr1|569610  
AT3G28560,AT3G28540,AT3G28510,AT3G28520  
Poptr1|697261,Poptr1|557226,Poptr1|550987  
Poptr1|76341  
Poptr1|555296  
Poptr1|105824,Poptr1|662988,Poptr1|702382,Poptr1|570011  
Poptr1|354674  
Poptr1|553022  
AT3G50930,AT3G50940 Poptr1|76340  
AT5G40010,AT3G28580 Poptr1|597305,Poptr1|648086,Poptr1|553021  
Poptr1|555290  
AT5G17750,AT5G17740,AT5G17730,AT5G17760,AT3G29800  
AT3G59960  
AT4G30860 Poptr1|578696  
AT2G44150 Poptr1|585029,Poptr1|562064  
AT1G78790 Poptr1|682774  
AT5G54890  
AT2G20020 Poptr1|705144  
AT4G31010 Poptr1|572157  
AT1G23400 Poptr1|687061  
AT2G40650  
Poptr1|581922  
AT3G57990 Poptr1|576269,Poptr1|344461  
Poptr1|356592  
AT1G78070,AT1G36070 Poptr1|684482,Poptr1|651301  
Poptr1|572901,Poptr1|595677,Poptr1|582341,Poptr1|595678,Poptr1|552844,Poptr1|572899  
AT5G56190  
Poptr1|560049  
AT1G55680,AT3G13340 Poptr1|708216,Poptr1|582533  
AT1G63160 Poptr1|684887  
AT4G15120,AT3G22160 Poptr1|560114  
AT4G10320 Poptr1|562257,Poptr1|689742  
Poptr1|63761,Poptr1|548654,Poptr1|63762,Poptr1|574958  
AT4G13050,AT3G25110  
AT1G08510 Poptr1|352132,Poptr1|561135  
Poptr1|566545,Poptr1|355530  
Poptr1|570298  
Poptr1|349000  
AT4G10090 Poptr1|696910  
Poptr1|349482  
AT5G15710 Poptr1|583883,Poptr1|584637  
AT2G22010 Poptr1|650810,Poptr1|654869,Poptr1|718900  
AT3G13300,AT3G13290 Poptr1|98119,Poptr1|708158  
Poptr1|349526,Poptr1|560059,Poptr1|98012  
AT2G42910 Poptr1|651671,Poptr1|693083  
AT1G10700 Poptr1|697982  
AT3G28670 Poptr1|342537  
AT3G03170 Poptr1|581039  
AT5G24890 Poptr1|578376,Poptr1|704630  
AT4G31510,AT2G24550  
Poptr1|64185,Poptr1|697693  
AT1G08460  
Poptr1|642828  
AT5G42320 Poptr1|642829,Poptr1|694901  
AT3G19240 Poptr1|744281,Poptr1|649556  
AT4G33400 Poptr1|551857,Poptr1|591944  
AT5G61260,AT5G07820 Poptr1|569947,Poptr1|569945,Poptr1|574863  
AT5G15430  
AT5G39380 Poptr1|556350  
Poptr1|107960,Poptr1|575414  
Poptr1|570318  
Poptr1|356109,Poptr1|575426,Poptr1|575415  
AT3G28020 Poptr1|103847  
Poptr1|575424,Poptr1|106158,Poptr1|583906  
AT3G48770  
AT4G39680 Poptr1|558581,Poptr1|718854  
AT5G03660,AT3G09980 Poptr1|589571  
AT2G27740 Poptr1|741625,Poptr1|649104  
AT2G36355,AT3G52900 Poptr1|563622  
AT2G36410,AT3G52920  
AT5G18590 Poptr1|54957,Poptr1|703704  
AT3G46200 Poptr1|54765  
AT5G64090 Poptr1|548760,Poptr1|553442  
AT5G21050 Poptr1|594917,Poptr1|556864  
AT3G16090,AT1G65040 Poptr1|588683,Poptr1|56849  
AT5G30490  
Poptr1|659146

Poptr1|659147  
AT3G08840 Poptr1|560967  
AT4G20000 Poptr1|349722,Poptr1|356458  
AT3G44785  
Poptr1|556941,Poptr1|676151  
Poptr1|741666  
AT1G27650,AT5G42820 Poptr1|560016,Poptr1|684694  
AT1G10320  
AT1G07985 Poptr1|64549  
AT1G19240 Poptr1|589335  
AT3G44620  
Poptr1|721498,Poptr1|594818  
Poptr1|565661,Poptr1|581001,Poptr1|584221  
Poptr1|108126  
Poptr1|107834  
AT1G21680 Poptr1|65435  
Poptr1|642251  
Poptr1|587323  
AT4G01870  
AT1G21670  
AT5G15680 Poptr1|97030  
AT1G78190,AT1G22270 Poptr1|559108,Poptr1|342480  
AT4G17960,AT5G46620 Poptr1|580087,Poptr1|356611  
AT3G26390,AT5G39010 Poptr1|352375  
AT5G38380 Poptr1|580803  
AT1G29220 Poptr1|647860,Poptr1|660760  
Poptr1|545509  
AT3G21000,AT3G20980  
Poptr1|101802,Poptr1|106948,Poptr1|75480,Poptr1|106395,Poptr1|578984,Poptr1|583464,Poptr1|103858,  
Poptr1|584331,Poptr1|104619,Poptr1|582458,Poptr1|562035,Poptr1|107067  
Poptr1|105908  
Poptr1|108619,Poptr1|102850,Poptr1|107852,Poptr1|562034,Poptr1|108378,Poptr1|348442,Poptr1|10532  
8  
Poptr1|586908,Poptr1|591589,Poptr1|597335,Poptr1|582056,Poptr1|583596,Poptr1|546161  
AT5G18630,AT5G18640 Poptr1|47235  
AT4G12620,AT4G14700 Poptr1|557846  
AT2G45790 Poptr1|585125,Poptr1|572218,Poptr1|748018  
AT1G61050 Poptr1|568254,Poptr1|555547  
AT3G09020,AT5G01250,AT2G38150 Poptr1|653107  
Poptr1|557299  
AT4G34360 Poptr1|546017  
AT2G28140 Poptr1|61006,Poptr1|558314  
AT5G59760  
AT3G44940,AT5G22930  
Poptr1|353328,Poptr1|567678  
AT3G06840,AT5G49170 Poptr1|565559,Poptr1|565560,Poptr1|703723  
Poptr1|580446  
Poptr1|571562  
Poptr1|720156,Poptr1|687172  
AT5G08670,AT5G08690,AT5G08680  
AT5G25770 Poptr1|654008  
AT3G04020  
Poptr1|705177,Poptr1|106745  
Poptr1|654467,Poptr1|718342,Poptr1|654470  
AT3G59410 Poptr1|654465  
Poptr1|654468  
Poptr1|653050  
AT3G54010  
Poptr1|735662  
AT2G48060 Poptr1|572793  
AT1G44446 Poptr1|347248,Poptr1|684509,Poptr1|716666  
AT5G62600 Poptr1|666382,Poptr1|570023  
Poptr1|666384,Poptr1|570025  
Poptr1|666383  
AT5G19970 Poptr1|100593  
AT2G32090 Poptr1|345409,Poptr1|687098  
AT1G15410 Poptr1|711824  
AT3G19800 Poptr1|558716  
AT4G27540 Poptr1|728371,Poptr1|703935  
AT1G14345 Poptr1|726648  
AT5G65520 Poptr1|551716  
Poptr1|352308  
AT1G52780 Poptr1|640659  
AT2G35035 Poptr1|702841  
Poptr1|65030  
AT4G02710,AT1G03080 Poptr1|709955,Poptr1|651800  
AT5G58320  
AT3G10880,AT5G05180 Poptr1|581085  
AT4G14760,AT3G22790 Poptr1|657188,Poptr1|566205  
AT2G30500 Poptr1|574467  
AT5G04260 Poptr1|567644,Poptr1|563710  
Poptr1|735077

AT5G06690  
AT2G30370 Poptr1|663594  
AT4G14723,AT3G22820 Poptr1|566193,Poptr1|696400  
Poptr1|665938  
AT3G21060 Poptr1|549907,Poptr1|60212  
AT5G24840 Poptr1|674442,Poptr1|48247  
AT5G51780,AT4G25400 Poptr1|570545  
AT1G12540,AT1G62975 Poptr1|575729,Poptr1|570544  
Poptr1|63636  
AT5G51790,AT4G25410  
AT1G23330  
AT1G10740 Poptr1|589797,Poptr1|544950,Poptr1|687056,Poptr1|565174,Poptr1|555897  
AT5G23880 Poptr1|671942,Poptr1|704680  
AT5G52540 Poptr1|714251  
AT5G24000 Poptr1|101469,Poptr1|592857  
Poptr1|594072,Poptr1|567141  
Poptr1|684591,Poptr1|715064  
AT2G38840  
Poptr1|710126  
AT1G73230,AT1G17880 Poptr1|699629,Poptr1|743498  
Poptr1|703297,Poptr1|714256  
AT1G68680 Poptr1|568194  
AT5G65120,AT5G10110 Poptr1|71659,Poptr1|562623  
AT2G42130,AT3G58010 Poptr1|57951,Poptr1|561256  
AT3G58460 Poptr1|685658  
AT1G09180,AT1G56330 Poptr1|699698,Poptr1|581949,Poptr1|729440  
AT3G62560,AT4G02080 Poptr1|720907,Poptr1|566791  
AT1G02620 Poptr1|103628  
AT1G29840,AT3G47560,AT3G47590,AT2G19550 Poptr1|729756,Poptr1|582957  
AT5G11910Poptr1|561652  
AT4G21450,AT4G05060 Poptr1|555486,Poptr1|568309  
Poptr1|571802  
AT5G54110Poptr1|568977,Poptr1|582081  
AT1G80420  
Poptr1|48820  
AT3G56570 Poptr1|556300  
AT2G26340 Poptr1|695131  
AT3G29970 Poptr1|545966,Poptr1|583847  
AT3G48140 Poptr1|719918,Poptr1|55015,Poptr1|570036  
Poptr1|664282,Poptr1|644913,Poptr1|681419  
AT3G15270,AT1G53160 Poptr1|647953  
Poptr1|695732  
Poptr1|560022  
AT1G20980,AT1G76580 Poptr1|346517,Poptr1|560023  
Poptr1|697438  
Poptr1|697439  
Poptr1|641518  
AT5G58510  
Poptr1|691522  
AT2G02470,AT1G14510 Poptr1|596799,Poptr1|693770  
AT5G26210 Poptr1|717823,Poptr1|668840,Poptr1|561024  
Poptr1|560917  
AT5G05610,AT3G11200 Poptr1|724456,Poptr1|656257  
AT5G20510,AT3G42790  
AT4G12800 Poptr1|588904,Poptr1|684165,Poptr1|732597  
AT2G19540 Poptr1|718767,Poptr1|650711  
AT2G44860 Poptr1|594829,Poptr1|697123  
AT3G52100 Poptr1|641347,Poptr1|641346,Poptr1|722814,Poptr1|557789  
AT3G08020  
AT1G09760 Poptr1|548145,Poptr1|711659  
Poptr1|589535,Poptr1|641169  
Poptr1|589536  
AT1G03910  
AT5G65450 Poptr1|551649,Poptr1|694482  
AT5G57990 Poptr1|352331,Poptr1|578750  
AT4G24560  
AT5G46740,AT4G17895 Poptr1|590014,Poptr1|580069  
AT4G30890 Poptr1|711964  
AT4G31670,AT2G24640 Poptr1|578363,Poptr1|353076  
AT1G17110Poptr1|691871,Poptr1|568600  
AT3G14400 Poptr1|568834,Poptr1|98381  
AT4G21500 Poptr1|545001,Poptr1|568301  
Poptr1|347728  
Poptr1|596089  
AT1G75120,AT1G75110,AT1G19360 Poptr1|722087  
AT5G47630 Poptr1|652365,Poptr1|701221  
AT5G36280,AT1G65290 Poptr1|596956,Poptr1|574083  
AT2G44620 Poptr1|677714,Poptr1|711128  
AT4G01897 Poptr1|572569,Poptr1|684253  
Poptr1|699824  
AT5G11790Poptr1|701919,Poptr1|561677  
AT5G56750,AT2G19620 Poptr1|704584

Poptr1|582705,Poptr1|574400  
AT2G20700,AT4G28280  
AT5G56170 Poptr1|744854,Poptr1|550665  
Poptr1|562590  
AT4G39920 Poptr1|650713,Poptr1|562589  
AT2G43320 Poptr1|654480,Poptr1|594499  
AT4G14000 Poptr1|586604,Poptr1|691678,Poptr1|577336,Poptr1|592490,Poptr1|597076  
Poptr1|676729,Poptr1|665958,Poptr1|574526,Poptr1|574529  
Poptr1|584328  
Poptr1|582809  
AT3G51190,AT4G36130,AT2G18020 Poptr1|46998,Poptr1|593862  
Poptr1|575522,Poptr1|705148  
AT2G37500  
AT2G27920 Poptr1|589528,Poptr1|721203  
AT3G01020,AT4G04080,AT4G22220 Poptr1|575170,Poptr1|570099  
AT4G12610 Poptr1|734542,Poptr1|560139  
AT1G73177 Poptr1|47426,Poptr1|647861  
AT4G24040 Poptr1|712296,Poptr1|350388,Poptr1|683643,Poptr1|560598  
AT1G35420 Poptr1|702537  
AT2G19800 Poptr1|583859  
AT1G14520 Poptr1|354387  
AT5G56640,AT4G26260  
Poptr1|672460  
AT4G28025 Poptr1|352426  
AT5G44150 Poptr1|594619,Poptr1|75343  
Poptr1|582079  
AT4G10265,AT4G10270  
Poptr1|574589,Poptr1|665998,Poptr1|591535,Poptr1|675007,Poptr1|747210,Poptr1|665999,Poptr1|59091  
6,Poptr1|676899,Poptr1|677236,Poptr1|666002,Poptr1|666003,Poptr1|571804,Poptr1|666000,Poptr1|663547,Poptr1|5  
74594,Poptr1|571807,Poptr1|574586  
AT4G33560,AT2G14070 Poptr1|744649,Poptr1|568978  
Poptr1|571803  
AT2G04070,AT2G04050,AT2G04040,AT2G04066,AT2G04080,AT2G04090,AT2G04100  
Poptr1|553050,Poptr1|553049,Poptr1|104102,Poptr1|545391,Poptr1|553048,Poptr1|574200,Poptr1|59234  
8,Poptr1|545392,Poptr1|546487  
AT1G33100,AT1G33110,AT1G33090,AT1G33080 Poptr1|571315  
AT2G38510 Poptr1|577160  
AT1G71870 Poptr1|592212  
Poptr1|675014  
AT5G44050,AT5G10420  
AT5G49130 Poptr1|565571  
AT3G21690 Poptr1|57292  
Poptr1|562982  
Poptr1|347437,Poptr1|692631  
AT1G71140  
AT1G15180,AT1G15170,AT1G15150,AT1G15160 Poptr1|566541,Poptr1|354219,Poptr1|566540  
Poptr1|106831  
AT3G03620,AT5G17700 Poptr1|571310,Poptr1|571314,Poptr1|575782,Poptr1|575780  
Poptr1|568878  
AT5G38030,AT3G26590,AT1G12950 Poptr1|354783,Poptr1|102644,Poptr1|592110,Poptr1|704211  
AT1G64820,AT1G66780,AT1G66760  
AT1G58340 Poptr1|551671  
AT5G19700,AT4G29140  
AT3G59030 Poptr1|559530,Poptr1|559529,Poptr1|710748  
AT3G23550,AT3G23560 Poptr1|568879,Poptr1|568880  
Poptr1|746362  
Poptr1|698821  
AT2G34360,AT5G52450,AT1G73700 Poptr1|345818  
AT1G47530  
AT4G22790 Poptr1|350123,Poptr1|60456  
AT4G25640 Poptr1|106002,Poptr1|728529,Poptr1|701210  
AT5G65380 Poptr1|696175  
Poptr1|555334,Poptr1|594010  
AT4G23030 Poptr1|662403,Poptr1|575743,Poptr1|343604  
Poptr1|560982  
AT1G23300  
AT4G00350 Poptr1|347992  
AT4G21900,AT4G21910,AT1G11670,AT1G61890  
Poptr1|716442  
Poptr1|727425,Poptr1|568010,Poptr1|544819  
Poptr1|658815,Poptr1|587364  
Poptr1|347708  
AT5G52050  
Poptr1|594627,Poptr1|103395,Poptr1|103360,Poptr1|594311,Poptr1|587956,Poptr1|579414  
AT1G05720 Poptr1|574408,Poptr1|665871,Poptr1|60736  
AT5G58030 Poptr1|578770,Poptr1|717812  
AT2G01913 Poptr1|696481,Poptr1|658675  
AT4G33360  
Poptr1|692522,Poptr1|551866  
AT2G45000 Poptr1|591696  
Poptr1|664846,Poptr1|656777,Poptr1|353678  
Poptr1|709884,Poptr1|694459

Poptr1|101971  
AT1G58440 Poptr1|672107,Poptr1|101386  
Poptr1|587948,Poptr1|587941,Poptr1|100766  
AT2G22830,AT4G37760  
Poptr1|590705  
Poptr1|586758,Poptr1|596525,Poptr1|586759,Poptr1|593249  
AT5G24155,AT5G24160,AT5G24150,AT5G24140  
Poptr1|696192  
Poptr1|597255,Poptr1|588349,Poptr1|573662,Poptr1|573668,Poptr1|596629  
Poptr1|586760,Poptr1|579173,Poptr1|596526  
Poptr1|592142,Poptr1|675236  
Poptr1|655194,Poptr1|696052,Poptr1|559360  
AT4G37130  
AT3G53800  
AT5G02150,AT3G09350 Poptr1|576815,Poptr1|351799  
AT1G14810 Poptr1|591327,Poptr1|566429,Poptr1|564677  
AT4G22960  
AT4G11860Poptr1|691171,Poptr1|350151  
AT1G30010 Poptr1|545815  
AT5G46920 Poptr1|670442,Poptr1|676496  
AT1G67180 Poptr1|545672  
AT5G22040 Poptr1|108589,Poptr1|563530,Poptr1|660117  
AT2G16860 Poptr1|556653  
AT5G19370  
Poptr1|697464  
Poptr1|597182  
Poptr1|588011  
Poptr1|568602  
Poptr1|593514  
Poptr1|552256  
Poptr1|347312,Poptr1|559176  
AT5G64610,AT5G09740  
AT5G57780  
AT4G30410 Poptr1|702204,Poptr1|561394  
AT1G80440,AT1G15670 Poptr1|48821  
AT2G44130,AT3G59940 Poptr1|75240  
Poptr1|548664  
Poptr1|547623,Poptr1|555218,Poptr1|561211  
Poptr1|686781  
AT4G30550,AT2G23970,AT2G23960,AT4G30530,AT4G30540 Poptr1|737930  
AT4G36210,AT2G18100 Poptr1|563247  
AT5G10000  
Poptr1|594972,Poptr1|697070,Poptr1|696999,Poptr1|660158  
AT2G27510  
AT1G10960,AT1G60950 Poptr1|579101,Poptr1|645629,Poptr1|746001,Poptr1|49513  
AT4G14890 Poptr1|658518,Poptr1|564845  
Poptr1|98106  
Poptr1|656387  
Poptr1|656386  
Poptr1|564151,Poptr1|567117  
Poptr1|659373,Poptr1|584324,Poptr1|656384,Poptr1|656385  
AT1G79350 Poptr1|656383,Poptr1|659374  
Poptr1|553355,Poptr1|553354  
AT2G07741  
Poptr1|585912  
Poptr1|593312  
Poptr1|573108  
AT2G24970 Poptr1|669196  
Poptr1|108815  
AT1G29900 Poptr1|581776,Poptr1|565742  
Poptr1|590413  
AT3G53900 Poptr1|717184  
AT4G03030 Poptr1|72858,Poptr1|710925  
AT4G39470 Poptr1|558633,Poptr1|562731  
Poptr1|564743,Poptr1|564747,Poptr1|591597  
AT5G27620 Poptr1|744494  
AT5G13240 Poptr1|687170  
AT5G44450 Poptr1|569328  
AT1G08280 Poptr1|556992,Poptr1|546323  
Poptr1|555189  
AT5G23710 Poptr1|547588,Poptr1|577782,Poptr1|678449  
AT1G75210 Poptr1|553343,Poptr1|573421  
AT1G75340 Poptr1|695454,Poptr1|584526  
AT5G38660 Poptr1|580777,Poptr1|714370,Poptr1|680967  
AT2G04039 Poptr1|552682,Poptr1|573153  
AT1G47410 Poptr1|644143,Poptr1|703107  
Poptr1|349682  
AT4G19670 Poptr1|575575,Poptr1|575570,Poptr1|690542  
Poptr1|562822  
Poptr1|730200  
Poptr1|559329  
Poptr1|594176

AT5G26120,AT3G10740  
Poptr1|576068,Poptr1|576074,Poptr1|576071  
Poptr1|576070  
Poptr1|717291  
Poptr1|591530  
Poptr1|685244  
AT2G22570 Poptr1|107788,Poptr1|718516  
AT1G51560,AT3G21140 Poptr1|563453,Poptr1|698742  
Poptr1|670620  
AT1G07820  
Poptr1|659786  
Poptr1|689130  
Poptr1|552012  
Poptr1|655445  
Poptr1|748855  
AT3G46320  
Poptr1|593861  
AT3G45930  
Poptr1|578600  
AT5G59970  
Poptr1|593858  
Poptr1|682445  
Poptr1|578598  
Poptr1|669446  
AT3G53730  
Poptr1|659784  
AT1G07660  
AT2G28740  
AT5G59690  
Poptr1|655455  
Poptr1|563268  
AT4G32620 Poptr1|352846,Poptr1|578135  
AT3G04240 Poptr1|702395,Poptr1|729924  
AT1G18730 Poptr1|728528  
AT5G24750 Poptr1|553449  
Poptr1|63056,Poptr1|554844  
AT3G24800 Poptr1|692083  
AT3G45880  
Poptr1|583319  
AT1G54850 Poptr1|570864  
AT1G54840  
AT1G20870 Poptr1|559998,Poptr1|342095  
Poptr1|570866  
AT1G76440 Poptr1|641168  
AT5G47320 Poptr1|582729  
Poptr1|585976,Poptr1|748250,Poptr1|62620,Poptr1|62549,Poptr1|108246,Poptr1|590901,Poptr1|678797  
Poptr1|559446  
AT1G34150 Poptr1|651647,Poptr1|693074  
AT3G21865 Poptr1|562308,Poptr1|679507  
Poptr1|698125  
AT3G22380 Poptr1|592674,Poptr1|592584,Poptr1|566265,Poptr1|696429,Poptr1|71964  
AT3G63180 Poptr1|559558,Poptr1|551169  
AT1G03905,AT5G44110 Poptr1|551020,Poptr1|715207  
AT5G02270 Poptr1|350473,Poptr1|351774  
AT2G06210  
Poptr1|571263,Poptr1|739128  
AT1G11655Poptr1|555336  
AT4G04745  
Poptr1|660030  
Poptr1|51963  
AT1G16810  
AT3G54660 Poptr1|575013  
Poptr1|582298,Poptr1|583934  
AT3G24170 Poptr1|639962,Poptr1|684772  
AT3G51720,AT2G38370 Poptr1|734286  
AT3G56270,AT2G40480 Poptr1|738361  
AT4G37700 Poptr1|571985,Poptr1|563345  
AT1G10140,AT1G58420 Poptr1|347570,Poptr1|663718  
AT5G18660 Poptr1|565352  
AT2G25970 Poptr1|653922,Poptr1|668798  
AT3G21640 Poptr1|691456,Poptr1|722820  
AT4G07990 Poptr1|685240,Poptr1|347551  
AT5G64190  
AT2G40390 Poptr1|55451  
AT3G12940 Poptr1|661173  
AT1G67630 Poptr1|565073,Poptr1|697939  
Poptr1|657403  
AT4G15620,AT4G15630 Poptr1|106120,Poptr1|590593,Poptr1|657692,Poptr1|657690  
AT1G34770 Poptr1|72324  
Poptr1|569483  
AT5G24120 Poptr1|586566,Poptr1|591382  
AT5G56930 Poptr1|352051

AT4G39120 Poptr1|557208  
AT4G23930  
AT1G64450 Poptr1|350361,Poptr1|548328  
AT1G04650 Poptr1|63099,Poptr1|554815  
Poptr1|593653  
AT4G27340 Poptr1|568983,Poptr1|593652,Poptr1|568985,Poptr1|568984  
Poptr1|644658  
AT4G01400 Poptr1|644657  
Poptr1|691938  
AT4G21105Poptr1|569319  
Poptr1|551418,Poptr1|559281  
AT1G76710 Poptr1|72623  
Poptr1|551417  
AT1G77300  
AT5G40280 Poptr1|592595,Poptr1|577523  
Poptr1|695260,Poptr1|735108  
AT1G09590,AT1G09690,AT1G57660,AT1G57860  
Poptr1|554656,Poptr1|640151  
Poptr1|581076  
Poptr1|668584  
AT1G73850 Poptr1|569824,Poptr1|700825  
AT3G20260 Poptr1|344806  
AT3G01175  
AT5G10910 Poptr1|559255  
Poptr1|564939  
Poptr1|587928  
AT1G04400 Poptr1|705186,Poptr1|564940  
AT4G08920 Poptr1|559103,Poptr1|709883  
AT3G24080 Poptr1|689524  
AT3G56860,AT2G41060 Poptr1|734640,Poptr1|560285,Poptr1|349040  
Poptr1|352268,Poptr1|576277,Poptr1|593071  
Poptr1|568729,Poptr1|555692  
AT2G18830,AT3G15010 Poptr1|550307  
AT2G22100,AT2G22090 Poptr1|558592  
Poptr1|696475,Poptr1|698137  
AT2G02050  
AT5G63440 Poptr1|570244,Poptr1|733598  
Poptr1|597190,Poptr1|553356,Poptr1|108802  
AT5G42950 Poptr1|597188  
Poptr1|597189,Poptr1|573253  
AT2G32235 Poptr1|555428,Poptr1|584571  
Poptr1|661002  
Poptr1|661001  
AT5G54440 Poptr1|726951  
Poptr1|661000  
AT1G51260 Poptr1|706292  
AT3G57650 Poptr1|688714,Poptr1|717417  
AT2G23420,AT4G36940 Poptr1|696024,Poptr1|694429  
AT1G21580  
AT1G21570 Poptr1|72511,Poptr1|347206  
AT5G02420 Poptr1|560755  
AT5G59360,AT2G28870,AT2G37610 Poptr1|549180,Poptr1|558082  
AT4G35050,AT2G16780 Poptr1|694240,Poptr1|697182  
AT5G58230 Poptr1|573230,Poptr1|552668  
AT5G63350,AT3G48510,AT5G50360 Poptr1|570218,Poptr1|575313  
AT5G40800,AT3G27250,AT5G40790 Poptr1|64914  
AT4G18470 Poptr1|545230,Poptr1|99964  
AT5G13640  
Poptr1|553633,Poptr1|548593  
AT3G44830 Poptr1|649061,Poptr1|582136  
AT5G66700  
AT5G03790  
AT1G27050  
AT1G69780,AT1G26960 Poptr1|696444,Poptr1|687113  
Poptr1|595233,Poptr1|661900  
AT2G18550,AT4G36740 Poptr1|703426,Poptr1|655260  
AT5G15150,AT3G01220  
Poptr1|736296  
Poptr1|569633  
AT5G53980 Poptr1|98386,Poptr1|568845  
Poptr1|594622  
Poptr1|565244  
AT2G36610 Poptr1|565427  
AT3G61890,AT2G46680 Poptr1|731421,Poptr1|348135  
AT4G40060,AT2G22430 Poptr1|562555,Poptr1|715838  
Poptr1|343725,Poptr1|548258  
AT5G65310  
Poptr1|716449,Poptr1|551610  
AT3G01470  
Poptr1|571881,Poptr1|569495  
AT3G51620 Poptr1|571880  
AT2G40520,AT3G56320

AT3G61690 Poptr1|568869,Poptr1|348068  
Poptr1|552683  
Poptr1|569494,Poptr1|574810  
AT3G15940,AT1G52420 Poptr1|593431,Poptr1|691217  
AT2G36895 Poptr1|576802  
AT1G19690 Poptr1|710812  
AT3G12100  
Poptr1|667366  
AT5G50430,AT1G17280 Poptr1|684995,Poptr1|683197  
AT5G02840,AT3G09600  
AT5G52660 Poptr1|556108,Poptr1|678595,Poptr1|692385,Poptr1|572303  
AT4G01280,AT1G01520  
AT1G66080 Poptr1|714225  
Poptr1|649659  
Poptr1|737088  
AT3G61180  
AT3G55530 Poptr1|724669  
Poptr1|682517  
AT4G26580,AT5G55970 Poptr1|642343,Poptr1|707730,Poptr1|728044  
AT4G11680  
Poptr1|646576  
AT1G68070 Poptr1|698157,Poptr1|686286  
AT3G51325  
Poptr1|566711,Poptr1|566707  
AT1G15100,AT2G01150 Poptr1|658830,Poptr1|354212  
Poptr1|345531,Poptr1|566007  
AT1G63170,AT1G12760 Poptr1|646577  
AT2G01735  
Poptr1|572164,Poptr1|347933,Poptr1|572163  
AT2G04240 Poptr1|573130  
AT3G04770,AT1G72370  
Poptr1|674637,Poptr1|666820,Poptr1|673233,Poptr1|553810  
AT1G06730 Poptr1|346880,Poptr1|559658  
AT5G14590  
Poptr1|691562  
Poptr1|353782,Poptr1|55426  
AT1G54340,AT1G65930 Poptr1|678577,Poptr1|648243  
AT2G42400  
Poptr1|574371,Poptr1|582790  
AT1G28520 Poptr1|545240,Poptr1|586063  
AT5G49570 Poptr1|56636  
AT5G16680,AT3G02890 Poptr1|663278,Poptr1|573998  
AT5G61100  
AT1G43770,AT4G17850  
Poptr1|72421  
Poptr1|580083  
Poptr1|559349  
Poptr1|106537,Poptr1|562423  
AT3G50920,AT5G66450 Poptr1|593911,Poptr1|76334  
AT4G37730,AT2G22850,AT3G49760 Poptr1|563338  
AT5G49450 Poptr1|659068,Poptr1|564400  
AT1G75390,AT4G34590  
Poptr1|719594,Poptr1|593898,Poptr1|694800,Poptr1|710135,Poptr1|686696,Poptr1|556499  
AT2G18160  
AT3G62420 Poptr1|572616,Poptr1|710459  
Poptr1|695130  
AT1G02180 Poptr1|551943,Poptr1|677710  
AT3G60440,AT3G60430,AT3G60450,AT3G60420 Poptr1|59381,Poptr1|551987  
Poptr1|550271  
AT5G46020 Poptr1|647916,Poptr1|586068  
AT2G38570 Poptr1|695352  
AT2G23360 Poptr1|651092,Poptr1|719246  
AT1G19835 Poptr1|715396,Poptr1|550906  
AT1G21810,AT1G77580 Poptr1|72462,Poptr1|551453,Poptr1|75675,Poptr1|558480  
AT3G05270  
AT2G24470,AT4G36120  
Poptr1|558479  
Poptr1|557408  
AT1G47900  
AT5G39790 Poptr1|553002  
AT1G33230,AT4G10430 Poptr1|708011,Poptr1|699192  
AT1G29820,AT1G29830 Poptr1|61281  
AT2G42950  
AT1G11840Poptr1|713477  
Poptr1|344669  
AT1G67280 Poptr1|689109,Poptr1|673159  
AT3G55280,AT2G39460 Poptr1|656035,Poptr1|682652,Poptr1|650312,Poptr1|561506,Poptr1|576598  
Poptr1|641249  
Poptr1|579208  
Poptr1|579209  
AT2G07689 Poptr1|584983  
Poptr1|584982



AT4G28290 Poptr1|590603,Poptr1|670580,Poptr1|574401,Poptr1|582706  
Poptr1|642517  
Poptr1|640249  
Poptr1|646846  
AT1G22860 Poptr1|646847  
Poptr1|658859  
AT1G47380 Poptr1|551863,Poptr1|703110  
Poptr1|656842,Poptr1|658858  
AT1G68410  
AT1G09160 Poptr1|570742,Poptr1|97801  
AT5G53160 Poptr1|661473,Poptr1|666182  
AT4G01026,AT1G01360  
AT5G45860,AT5G45870,AT4G18620,AT2G40330  
AT5G05440  
AT4G27920  
Poptr1|554482,Poptr1|640369  
AT1G73000 Poptr1|561675,Poptr1|668806  
AT4G17870,AT5G46790 Poptr1|590008,Poptr1|60228  
AT2G26040  
AT2G38310 Poptr1|653167,Poptr1|668108,Poptr1|656301,Poptr1|567217  
Poptr1|572380,Poptr1|692363  
Poptr1|594045  
AT1G01900 Poptr1|552099,Poptr1|730952  
Poptr1|575004,Poptr1|579601  
Poptr1|103326  
AT5G03620 Poptr1|589582  
Poptr1|563955,Poptr1|582668  
Poptr1|573376,Poptr1|65781  
AT2G39850  
Poptr1|109225  
AT1G70800,AT1G70810,AT1G23140  
Poptr1|589921  
AT1G32980 Poptr1|107762  
Poptr1|596655  
AT5G59110  
AT5G67360 Poptr1|694451  
AT4G05330,AT4G21160 Poptr1|707743  
Poptr1|560097,Poptr1|701215  
Poptr1|65969,Poptr1|65968  
Poptr1|105666,Poptr1|567348  
AT1G73580  
AT5G37740 Poptr1|714125,Poptr1|645270  
AT1G30600  
Poptr1|65970,Poptr1|594810  
Poptr1|105530  
AT1G20150  
Poptr1|597750  
Poptr1|658758,Poptr1|686298  
AT4G34980 Poptr1|556628,Poptr1|557090  
Poptr1|587568,Poptr1|103785  
Poptr1|573547,Poptr1|548551,Poptr1|554277,Poptr1|554279,Poptr1|554280  
AT4G30020,AT2G19170 Poptr1|689202,Poptr1|560673  
Poptr1|697239,Poptr1|713118  
AT1G70790  
AT5G47710  
AT1G04110Poptr1|349102  
AT4G00230 Poptr1|552098,Poptr1|572158  
AT4G10520,AT4G10530,AT4G10510,AT4G10540,AT4G10550,AT1G32950,AT1G32960,AT1G32940,AT1G32970,AT4  
G21640,AT4G21630,AT4G21650,AT1G66210,AT1G66220,AT4G21326,AT5G11940,AT4G21323  
Poptr1|550464,Poptr1|569265,Poptr1|550465,Poptr1|707935  
Poptr1|740568,Poptr1|551801  
AT3G14240 Poptr1|553817,Poptr1|690422  
AT5G45640,AT5G45650 Poptr1|568484  
Poptr1|563956  
Poptr1|343913  
AT5G59190 Poptr1|558012  
Poptr1|582559,Poptr1|684103  
AT3G14067 Poptr1|645825,Poptr1|690413  
Poptr1|350153,Poptr1|356317,Poptr1|567347,Poptr1|567351,Poptr1|567352,Poptr1|567346  
AT2G01540 Poptr1|573377  
Poptr1|546328  
Poptr1|642525  
AT1G62340 Poptr1|568089  
AT2G05920 Poptr1|702664  
AT1G20160 Poptr1|710611,Poptr1|559867,Poptr1|550849  
Poptr1|642524,Poptr1|596114  
Poptr1|97141,Poptr1|103324,Poptr1|705289,Poptr1|75645,Poptr1|75642,Poptr1|592573,Poptr1|558450  
AT5G59810 Poptr1|351105  
Poptr1|586013  
AT5G67090 Poptr1|59470,Poptr1|740448,Poptr1|551840,Poptr1|719279  
Poptr1|596538  
Poptr1|596255

AT3G17980,AT1G48590 Poptr1|687736  
AT4G20430,AT5G44530 Poptr1|569308,Poptr1|705065  
AT4G26330 Poptr1|62671  
AT2G04160 Poptr1|573140  
AT5G51750 Poptr1|734063,Poptr1|570550  
AT3G07940 Poptr1|690870,Poptr1|555030  
AT5G58820,AT5G58830,AT5G58840,AT5G59090,AT5G59120,AT5G59130,AT3G46840,AT3G46850,AT5G59100  
AT1G66360  
AT4G15040 Poptr1|569264  
Poptr1|727231,Poptr1|691930  
Poptr1|591646  
Poptr1|565026  
AT1G04620 Poptr1|583387  
Poptr1|594353  
Poptr1|64067  
Poptr1|587230,Poptr1|559107,Poptr1|556558,Poptr1|591567,Poptr1|569645,Poptr1|581270,Poptr1|58784  
6,Poptr1|585089,Poptr1|593662,Poptr1|586110,Poptr1|100271,Poptr1|547958,Poptr1|597537,Poptr1|62949,Poptr1|58  
7843,Poptr1|106494,Poptr1|352348,Poptr1|552013,Poptr1|99309,Poptr1|593727,Poptr1|63025,Poptr1|596565,Poptr1|  
596708,Poptr1|594766,Poptr1|581648,Poptr1|593354,Poptr1|349313,Poptr1|106985,Poptr1|576879,Poptr1|63966,Pop  
ptr1|587756,Poptr1|356191,Poptr1|576596,Poptr1|560804,Poptr1|591970,Poptr1|582797  
Poptr1|580527,Poptr1|586171,Poptr1|583896,Poptr1|568492,Poptr1|596888,Poptr1|597137,Poptr1|59660  
9,Poptr1|587848,Poptr1|584795,Poptr1|586868,Poptr1|573425  
Poptr1|573695  
Poptr1|100726,Poptr1|597536,Poptr1|579949  
AT3G60310 Poptr1|561018  
AT1G19110  
AT1G72500 Poptr1|98985,Poptr1|343288  
AT4G10920 Poptr1|48679  
AT4G00980 Poptr1|552283  
AT4G31740,AT2G17980 Poptr1|556789  
Poptr1|582840,Poptr1|645032,Poptr1|552716,Poptr1|595697,Poptr1|645031,Poptr1|573043  
AT2G44310 Poptr1|583302  
AT1G54530 Poptr1|595457  
AT4G27900,AT5G53420 Poptr1|355280  
AT1G27310 Poptr1|554771,Poptr1|548036  
AT1G11570Poptr1|568204  
AT1G27970  
AT5G53120 Poptr1|680533,Poptr1|747550,Poptr1|345718  
AT1G70310,AT1G23820  
Poptr1|107401  
Poptr1|657096,Poptr1|658609  
Poptr1|664484  
AT4G03200  
AT5G62390 Poptr1|699245,Poptr1|701115  
Poptr1|555677,Poptr1|728200  
AT2G34150,AT1G29170  
AT4G18600 Poptr1|555676  
AT5G57120 Poptr1|669817,Poptr1|652849  
AT4G10810 Poptr1|552299,Poptr1|712591,Poptr1|640301  
Poptr1|667779,Poptr1|589418  
AT4G28530 Poptr1|643139,Poptr1|52151  
AT1G03490  
AT4G10350,AT1G33280 Poptr1|581037  
Poptr1|352489,Poptr1|576564  
AT1G32770 Poptr1|348155,Poptr1|572457,Poptr1|727328,Poptr1|707918  
Poptr1|575413,Poptr1|356106  
Poptr1|556323  
Poptr1|557863,Poptr1|549237,Poptr1|557862,Poptr1|554126,Poptr1|669459  
Poptr1|567113,Poptr1|564155  
AT5G13180 Poptr1|683598,Poptr1|693263  
AT5G22380,AT3G44350 Poptr1|106171,Poptr1|48946,Poptr1|723443  
Poptr1|646857,Poptr1|640241  
AT1G76420 Poptr1|73196,Poptr1|342098  
AT1G52890,AT3G15500,AT4G27410 Poptr1|60203,Poptr1|728430  
AT2G43000 Poptr1|71858,Poptr1|76013,Poptr1|52077,Poptr1|347027  
Poptr1|558471,Poptr1|718664  
AT1G34180,AT1G34190  
Poptr1|714847,Poptr1|551262,Poptr1|587432,Poptr1|100544,Poptr1|104337,Poptr1|587428,Poptr1|58359  
0  
AT5G64060,AT5G09330 Poptr1|562432,Poptr1|703611  
AT5G18270,AT3G04060 Poptr1|571169,Poptr1|573887  
AT1G33060 Poptr1|642541  
Poptr1|556036  
Poptr1|677746  
AT3G56530  
AT1G12260,AT1G62700 Poptr1|57748,Poptr1|570598,Poptr1|350087,Poptr1|97354  
AT5G50820  
AT2G18060,AT4G36160 Poptr1|655433,Poptr1|679170  
AT1G56010 Poptr1|71860,Poptr1|719155  
AT1G01720 Poptr1|694576,Poptr1|710736

AT5G04400  
 AT3G17730 Poptr1|569414,Poptr1|96976  
 Poptr1|352383  
 AT2G27300 Poptr1|556827  
 AT1G79580 Poptr1|564139,Poptr1|567139  
 AT3G29035,AT5G39610  
 Poptr1|701844  
 AT3G15170  
 Poptr1|584813,Poptr1|656455  
 Poptr1|674296,Poptr1|555745  
 AT3G03200,AT5G17260  
 AT2G33480  
 AT3G04420,AT1G02220,AT1G02250,AT1G01010  
 Poptr1|596802  
 AT3G12910 Poptr1|351524,Poptr1|576354  
 AT1G65910  
 AT5G14000 Poptr1|703895,Poptr1|707094  
 AT3G44290,AT5G22290  
 Poptr1|569635  
 AT5G24590,AT3G49530  
 Poptr1|355372  
 Poptr1|592235  
 AT5G53950 Poptr1|670037  
 AT5G08790,AT5G63790  
 Poptr1|591981  
 Poptr1|673658  
 AT3G04070 Poptr1|573885,Poptr1|571167  
 AT1G26870  
 Poptr1|595259  
 Poptr1|48860,Poptr1|343257  
 AT1G77450  
 AT3G56520,AT5G41090 Poptr1|594505,Poptr1|75413  
 Poptr1|574280  
 AT1G32510  
 AT1G32870  
 AT2G24430 Poptr1|672615,Poptr1|100050  
 AT3G18400 Poptr1|574902,Poptr1|355567  
 Poptr1|552378,Poptr1|347923,Poptr1|572483,Poptr1|705495,Poptr1|552380,Poptr1|700334,Poptr1|55211  
 7  
 AT5G66300  
 AT2G17040 Poptr1|713422  
 Poptr1|574652,Poptr1|728893  
 AT5G61430,AT5G07680 Poptr1|569497  
 AT4G01540,AT4G01520,AT4G01550,AT3G04430 Poptr1|104773,Poptr1|699970  
 AT1G54330  
 Poptr1|694407  
 AT2G46770,AT3G61910  
 AT2G02450 Poptr1|553564  
 AT5G39820  
 AT1G64105,AT5G18300,AT1G19040  
 AT1G52880,AT3G15510  
 Poptr1|569637  
 Poptr1|648196  
 AT3G10480,AT3G10490 Poptr1|725099  
 AT5G64530  
 Poptr1|668560  
 AT1G61110 Poptr1|647737,Poptr1|660994  
 Poptr1|75622,Poptr1|71534  
 AT3G12977  
 AT1G69490 Poptr1|567019  
 AT1G71930 Poptr1|574281  
 Poptr1|556406,Poptr1|580398,Poptr1|661239  
 Poptr1|663889  
 AT4G35580  
 AT5G46590,AT4G17980 Poptr1|356602,Poptr1|60234  
 AT5G04410,AT3G10500 Poptr1|563667  
 AT5G62380  
 AT2G25625 Poptr1|654086  
 AT5G17610 Poptr1|571353,Poptr1|571354  
 AT2G22425,AT4G40042 Poptr1|720992,Poptr1|658139  
 AT3G52450,AT2G35930 Poptr1|561154,Poptr1|592470,Poptr1|576497  
 AT1G66160,AT5G37490,AT3G02840  
 Poptr1|556001,Poptr1|552899,Poptr1|60338,Poptr1|345655,Poptr1|566411,Poptr1|564694  
 Poptr1|59930  
 Poptr1|48936  
 Poptr1|342820  
 AT3G11840 Poptr1|48937,Poptr1|558224,Poptr1|558225,Poptr1|594188,Poptr1|561153,Poptr1|576498  
 Poptr1|351307  
 AT2G41120  
 AT5G52780  
 AT4G19100 Poptr1|702975  
 AT3G57860,AT2G42260 Poptr1|672924,Poptr1|576299

AT2G13360 Poptr1|697575,Poptr1|641050  
AT5G62650 Poptr1|741117,Poptr1|579206,Poptr1|714350,Poptr1|556982,Poptr1|586270  
AT4G18830 Poptr1|555630  
AT5G01840 Poptr1|560981,Poptr1|571884  
AT2G30400,AT1G06920  
AT3G52525  
AT5G58360 Poptr1|584727  
AT2G29570,AT1G07370 Poptr1|650191,Poptr1|681818  
Poptr1|567322  
AT1G24340 Poptr1|354686  
Poptr1|572662  
AT2G17230 Poptr1|595010,Poptr1|556770  
AT1G35140  
AT3G02970  
AT4G08950 Poptr1|551592  
AT2G35150  
AT5G51550 Poptr1|570583,Poptr1|734007  
AT5G09440,AT5G64260 Poptr1|577384,Poptr1|549850  
Poptr1|589733,Poptr1|596022,Poptr1|579928  
Poptr1|587937  
Poptr1|651265,Poptr1|680592,Poptr1|651266,Poptr1|559076,Poptr1|747249,Poptr1|101857,Poptr1|10671  
1,Poptr1|579585,Poptr1|551593  
Poptr1|551595  
AT1G03880,AT5G44120,AT4G28520,AT1G03890  
Poptr1|705552,Poptr1|670351,Poptr1|743113,Poptr1|580010,Poptr1|581135,Poptr1|641975,Poptr1|55969  
9,Poptr1|692900  
Poptr1|559696  
Poptr1|739342  
Poptr1|569407  
AT2G35795 Poptr1|563778  
AT5G03030,AT3G09700  
AT5G57520 Poptr1|96865,Poptr1|58703  
AT1G24625  
Poptr1|558917  
AT1G66140 Poptr1|348737,Poptr1|555999,Poptr1|657009,Poptr1|566407  
AT1G80730  
AT5G48890 Poptr1|553123  
AT3G54390 Poptr1|690863  
AT5G11480  
AT2G22870 Poptr1|571987,Poptr1|76484  
Poptr1|585208,Poptr1|589763  
Poptr1|579761,Poptr1|352820  
AT2G26240 Poptr1|653780  
AT3G43520  
AT2G02810,AT1G14360 Poptr1|577205,Poptr1|653231  
AT2G25730 Poptr1|578129,Poptr1|685526  
AT2G23430  
AT3G19150,AT1G49620 Poptr1|557369  
AT4G13370  
AT1G08760 Poptr1|562209,Poptr1|594552  
AT3G14170  
Poptr1|584138,Poptr1|646024  
AT1G70340,AT1G23790 Poptr1|658364,Poptr1|345558  
Poptr1|106254,Poptr1|723380,Poptr1|98933  
AT2G31920  
AT3G19610 Poptr1|65282  
Poptr1|650339  
Poptr1|679342,Poptr1|697095,Poptr1|741706  
AT5G20080 Poptr1|716762  
AT5G17770 Poptr1|562805,Poptr1|575076,Poptr1|571289  
Poptr1|725350  
AT1G67080 Poptr1|580800,Poptr1|714027  
AT1G13220,AT1G68790 Poptr1|696593  
AT5G65770  
AT1G67230 Poptr1|690086  
AT4G33790 Poptr1|721533  
Poptr1|741608,Poptr1|54335  
AT3G56700,AT3G60060  
Poptr1|582647,Poptr1|649125  
Poptr1|546333  
Poptr1|593665,Poptr1|574194  
AT3G11980,Poptr1|344434  
Poptr1|574195  
Poptr1|102198  
Poptr1|566214  
Poptr1|597282  
AT3G44550,AT3G44560,AT5G22500,AT3G44540,AT5G22420  
AT3G20890 Poptr1|557855,Poptr1|49051  
AT5G66010 Poptr1|650984  
AT5G57960 Poptr1|643058,Poptr1|651980,Poptr1|643059  
Poptr1|563330  
AT2G41700 Poptr1|695545

Poptr1|108982  
AT5G61740,AT5G61700,AT3G47760,AT3G47750,AT3G47770,AT3G47780,AT3G47740,AT3G47790  
Poptr1|744140,Poptr1|345893  
AT5G61690,AT5G61730,AT3G47730 Poptr1|699459,Poptr1|581361  
Poptr1|98271  
AT3G58810 Poptr1|569258,Poptr1|49458  
Poptr1|589741  
AT3G63100 Poptr1|587091  
AT3G61940,AT2G46800 Poptr1|348167,Poptr1|731458  
Poptr1|108733  
AT2G29410 Poptr1|581110,Poptr1|108638,Poptr1|549120  
AT1G64510 Poptr1|709127  
AT2G40770 Poptr1|581098,Poptr1|581093  
AT5G63770 Poptr1|715832,Poptr1|718683  
AT5G07920 Poptr1|569936  
AT5G02830 Poptr1|579856,Poptr1|59140,Poptr1|579855  
Poptr1|702880,Poptr1|580161  
AT4G17600,AT5G47110 Poptr1|575510,Poptr1|107090  
AT5G14960,AT3G01330,AT3G48160 Poptr1|570039,Poptr1|700898  
AT5G37560,AT2G21420,AT2G25380,AT3G45470,AT2G25370,AT2G25360,AT5G60250,AT3G45500,AT3G45490,AT3  
G45525,AT2G16520,AT3G45480,AT3G45510,AT3G43180,AT3G45560,AT3G45460,AT3G45580,AT3G45570,AT3G43  
750,AT3G45555,AT3G45540,AT2G26135,AT2G26130  
AT3G14250 Poptr1|104179,Poptr1|62817,Poptr1|647383  
AT2G22940  
AT3G53690 Poptr1|589481,Poptr1|592164,Poptr1|574378  
AT5G07640,AT2G19610 Poptr1|649070,Poptr1|351956  
AT1G80500 Poptr1|746829  
AT5G38620,AT1G60920 Poptr1|101151  
AT1G02100 Poptr1|591778  
Poptr1|591777  
AT2G22250 Poptr1|71675,Poptr1|695900  
AT1G23230 Poptr1|564651  
Poptr1|564650  
Poptr1|564652  
AT2G36590,AT2G39890,AT3G55740 Poptr1|55506,Poptr1|353622  
AT1G54150 Poptr1|553614,Poptr1|548574  
AT5G47890 Poptr1|693300,Poptr1|708898  
AT1G69340 Poptr1|105652,Poptr1|353907,Poptr1|55381  
AT5G64680 Poptr1|708869  
AT1G63770 Poptr1|102746,Poptr1|102747,Poptr1|683680  
Poptr1|583595,Poptr1|705308,Poptr1|554388  
AT5G52200 Poptr1|701177,Poptr1|570481  
AT4G11640Poptr1|548481  
AT4G17650 Poptr1|692528  
Poptr1|713282,Poptr1|557094,Poptr1|553979  
AT4G38630  
Poptr1|594942,Poptr1|697083  
AT5G22340  
Poptr1|351762  
Poptr1|684814  
AT2G46920 Poptr1|692319,Poptr1|688220  
AT2G35350 Poptr1|589986  
AT3G16560 Poptr1|54946,Poptr1|704818  
AT5G02400,AT3G09400  
AT2G28890,AT1G07630 Poptr1|64395,Poptr1|723282  
Poptr1|555819  
AT4G04930 Poptr1|580886  
AT1G03280,AT4G20340,AT4G20810  
Poptr1|584179  
Poptr1|657024  
Poptr1|705014  
Poptr1|55184  
Poptr1|574826  
AT3G04820 Poptr1|105497,Poptr1|594105,Poptr1|595444  
AT2G23670 Poptr1|563064  
AT4G27390 Poptr1|744679  
AT5G46840 Poptr1|343477,Poptr1|590029  
AT3G63490 Poptr1|697525,Poptr1|683850  
AT2G42710 Poptr1|732060  
Poptr1|676996  
AT5G11450Poptr1|561817  
AT4G01575  
Poptr1|574624  
Poptr1|572491,Poptr1|572492,Poptr1|572490  
AT3G61980 Poptr1|552385,Poptr1|731494  
AT5G25540,AT5G11440 Poptr1|561818  
AT2G35610 Poptr1|742677  
AT5G49540 Poptr1|698333,Poptr1|686370  
Poptr1|348975  
AT4G13140 Poptr1|343153  
Poptr1|568282,Poptr1|713695  
AT2G29990,AT1G07180 Poptr1|723028

AT1G44835 Poptr1|347274,Poptr1|559217  
Poptr1|654378,Poptr1|679699  
AT4G28370,AT2G20650  
AT3G58730 Poptr1|549686  
AT3G54630 Poptr1|63890  
AT3G03970  
AT1G54385 Poptr1|573910,Poptr1|573915,Poptr1|571213  
Poptr1|574903  
Poptr1|661192  
Poptr1|727221,Poptr1|550529,Poptr1|642760,Poptr1|73209  
AT1G76510,AT1G20910 Poptr1|710670  
AT2G17410 Poptr1|679989  
AT1G32310 Poptr1|590043,Poptr1|349915  
AT5G42370  
Poptr1|715748  
AT2G26150 Poptr1|561642  
AT4G11660Poptr1|548499  
Poptr1|572837  
AT5G62020 Poptr1|575795,Poptr1|570475  
Poptr1|643254  
AT5G54070 Poptr1|352050  
AT5G03720  
Poptr1|576393  
AT5G43840  
AT2G41690 Poptr1|695546,Poptr1|576364  
Poptr1|715043  
AT4G17750  
AT3G22830 Poptr1|566191,Poptr1|345421  
AT4G13980 Poptr1|641884,Poptr1|597074  
AT4G19630,AT1G77570,AT4G18870  
AT3G63350,AT3G51910  
AT4G36990 Poptr1|53312  
AT5G45710,AT4G18880 Poptr1|546410,Poptr1|568665  
AT1G32330 Poptr1|346256,Poptr1|349914,Poptr1|573864,Poptr1|688032  
AT1G46264 Poptr1|591969,Poptr1|709942  
Poptr1|103124,Poptr1|97154,Poptr1|545307  
AT3G02990,AT5G16820  
AT3G24520  
Poptr1|641429  
AT1G67970 Poptr1|566423,Poptr1|686281  
AT5G57230  
Poptr1|695483  
AT1G21760 Poptr1|692730,Poptr1|559244  
AT1G02160 Poptr1|677649  
AT1G30000 Poptr1|694098  
AT3G21160,AT1G51590 Poptr1|655661  
Poptr1|579017  
AT4G35900,AT2G17770 Poptr1|694871,Poptr1|593807  
AT1G07130 Poptr1|559587  
AT3G20210 Poptr1|563463,Poptr1|344805  
AT1G62710 Poptr1|581223,Poptr1|693499  
AT2G25940,AT4G32940 Poptr1|653937,Poptr1|701900  
AT4G11270Poptr1|693410,Poptr1|548413  
AT1G60700  
AT1G75530  
AT3G54350 Poptr1|72988,Poptr1|342196  
AT1G12270,AT1G62740  
AT4G12400 Poptr1|554224,Poptr1|690143  
AT4G08320 Poptr1|72453  
Poptr1|108964  
AT4G00870 Poptr1|572446,Poptr1|552325,Poptr1|548256,Poptr1|343726  
AT2G28160  
AT1G32640,AT5G46830  
AT2G46510  
AT4G17880,AT5G46760 Poptr1|743129,Poptr1|676550  
AT4G16430 Poptr1|52132,Poptr1|342256  
AT2G22760,AT2G22770  
AT1G01260 Poptr1|348090  
AT1G10610  
AT2G22750,AT4G37850 Poptr1|557581,Poptr1|550059,Poptr1|655501,Poptr1|71831  
AT4G21330 Poptr1|555444,Poptr1|731360  
AT5G53050 Poptr1|57468,Poptr1|687709  
AT4G16670  
AT4G32780 Poptr1|668905  
AT5G43870  
AT5G47440,AT4G17350 Poptr1|702830,Poptr1|343413  
AT3G63300 Poptr1|342285,Poptr1|52104  
AT4G14740,AT3G22810 Poptr1|686240,Poptr1|687090  
Poptr1|668906  
AT4G32785  
AT5G57770 Poptr1|578668  
AT1G55000 Poptr1|595619,Poptr1|104701,Poptr1|595610,Poptr1|699753

AT4G10180 Poptr1|571954  
Poptr1|575699  
AT3G22660  
AT1G10200 Poptr1|551777,Poptr1|572031  
Poptr1|649691,Poptr1|65296  
AT3G61230,AT2G45800  
Poptr1|585445,Poptr1|548490  
Poptr1|698536,Poptr1|720044  
AT3G55770,AT2G39900  
AT1G01780 Poptr1|731048,Poptr1|644430  
Poptr1|355852,Poptr1|688485  
AT1G12650 Poptr1|640545  
AT3G05937,AT5G26731 Poptr1|581586  
AT3G04520 Poptr1|699856,Poptr1|738237  
AT1G08630  
AT5G67180 Poptr1|655117,Poptr1|558886  
AT3G54320 Poptr1|353183  
Poptr1|692565,Poptr1|558959  
AT3G54990,AT2G39250,AT5G60120  
Poptr1|583605  
AT3G20840,AT1G51190 Poptr1|102980,Poptr1|48527,Poptr1|350796  
AT1G79700,AT1G16060  
AT4G36920  
AT1G72570 Poptr1|349456,Poptr1|63671  
Poptr1|352382,Poptr1|58733,Poptr1|350749,Poptr1|62791  
AT5G17430 Poptr1|567189,Poptr1|345072  
AT2G41710 Poptr1|344141  
AT4G37750  
AT2G28550 Poptr1|59142,Poptr1|576640  
AT5G57390 Poptr1|704064,Poptr1|578588  
AT5G10510,AT5G65510 Poptr1|563289  
Poptr1|655527,Poptr1|663698  
AT2G41530 Poptr1|652670  
AT2G18250 Poptr1|356962  
AT4G29560 Poptr1|352089  
AT4G19980 Poptr1|350059,Poptr1|97388  
AT2G39970  
Poptr1|656207,Poptr1|724534  
Poptr1|684699  
AT1G07320 Poptr1|344591  
Poptr1|48799,Poptr1|349495  
AT1G15440  
AT2G38025  
Poptr1|583612,Poptr1|576306  
Poptr1|659996,Poptr1|563636,Poptr1|698819  
Poptr1|565891,Poptr1|354676  
AT3G57810  
AT5G20040 Poptr1|642383  
AT1G08180 Poptr1|548735  
AT3G10525,AT5G04470 Poptr1|567707  
AT1G71740 Poptr1|651631  
AT2G06005,AT5G20580 Poptr1|668786  
AT3G23620 Poptr1|575280  
AT1G59900 Poptr1|657555,Poptr1|698009  
AT1G24180  
AT1G01090 Poptr1|348162  
AT3G17000 Poptr1|566819,Poptr1|564396  
AT1G77680 Poptr1|587496,Poptr1|72433,Poptr1|342433  
AT2G26350 Poptr1|717083  
AT1G50950,AT3G20560,AT4G27080 Poptr1|56015,Poptr1|571502  
Poptr1|568849  
AT1G78720  
AT2G34250,AT1G29310  
Poptr1|585495,Poptr1|728286  
AT4G39440 Poptr1|654907,Poptr1|71747  
AT1G71070 Poptr1|696538,Poptr1|658798  
Poptr1|725281,Poptr1|720100  
AT4G27480  
AT1G03520,AT4G03340 Poptr1|56870,Poptr1|580358  
AT3G24040 Poptr1|48568  
AT2G37585 Poptr1|694964  
AT5G39990,AT5G15050 Poptr1|714491,Poptr1|701801  
AT1G53100,AT3G15350 Poptr1|568903,Poptr1|742976  
AT3G03690 Poptr1|730069  
AT5G53045 Poptr1|666115,Poptr1|661540  
AT3G55600,AT1G54110 Poptr1|578973  
AT5G20660 Poptr1|353384  
AT1G07830 Poptr1|644722,Poptr1|47648  
AT5G05560 Poptr1|353695  
AT4G14120,AT3G23740 Poptr1|692105  
AT2G40550 Poptr1|574096  
AT1G19120

AT3G14080 Poptr1|685057,Poptr1|745824  
 AT5G23540 Poptr1|683221,Poptr1|684401  
 AT1G62940 Poptr1|554790,Poptr1|63127  
 AT1G51680,AT3G21240 Poptr1|675786,Poptr1|704057,Poptr1|578610,Poptr1|343915,Poptr1|547738  
 Poptr1|109016,Poptr1|104177,Poptr1|582864,Poptr1|593742,Poptr1|580683,Poptr1|579326,Poptr1|58030  
 1  
 Poptr1|593539  
 Poptr1|597478  
 AT3G16170 Poptr1|705747  
 AT3G48990 Poptr1|701195  
 AT4G19010 Poptr1|343503  
 AT3G21230  
 AT5G38120  
 AT1G20510 Poptr1|73128,Poptr1|346608  
 Poptr1|567691,Poptr1|353318  
 AT1G20490 Poptr1|580303  
 Poptr1|64915,Poptr1|570223,Poptr1|585122,Poptr1|679285,Poptr1|703451,Poptr1|570226,Poptr1|576743  
 AT4G05160 Poptr1|714367,Poptr1|704152  
 Poptr1|709380  
 AT1G30520  
 AT1G20500  
 AT1G20480  
 AT5G63380 Poptr1|570222,Poptr1|688529,Poptr1|662119  
 Poptr1|590571  
 Poptr1|589806,Poptr1|667841  
 Poptr1|585377  
 AT1G65060 Poptr1|665396  
 AT1G58280  
 AT2G17280  
 Poptr1|710877  
 AT1G09935  
 AT5G64460 Poptr1|642163,Poptr1|722525  
 AT1G09932 Poptr1|684449  
 AT1G14430 Poptr1|565430  
 Poptr1|709024  
 AT3G57620 Poptr1|570966,Poptr1|595476  
 AT1G67290,AT5G19580 Poptr1|584045  
 AT1G75620,AT1G19900 Poptr1|73002,Poptr1|550930  
 AT3G53950 Poptr1|667914  
 Poptr1|573080  
 AT4G16447 Poptr1|575904,Poptr1|560197  
 AT4G34020 Poptr1|697327  
 Poptr1|568826  
 Poptr1|680829  
 AT3G14990,AT1G53280  
 AT5G37340,AT5G22480 Poptr1|556083  
 AT3G24830,AT3G07110,AT4G13170,AT5G48760 Poptr1|641932,Poptr1|577417  
 Poptr1|553165  
 AT3G04140  
 Poptr1|565075  
 AT3G01750 Poptr1|706911  
 Poptr1|352987,Poptr1|579734,Poptr1|352986  
 AT2G18950 Poptr1|580507,Poptr1|578578  
 AT5G11340  
 Poptr1|669001,Poptr1|654093  
 AT4G14450,AT3G23170,AT1G04330 Poptr1|595823,Poptr1|726384  
 AT5G01570,AT3G08880 Poptr1|701640  
 Poptr1|570350  
 AT2G43030  
 Poptr1|56750  
 AT4G36700,AT2G18540 Poptr1|563117  
 Poptr1|544840  
 AT5G54410  
 Poptr1|665423  
 AT5G25870  
 Poptr1|347346  
 Poptr1|72555  
 AT1G63220 Poptr1|552132  
 AT3G55470 Poptr1|105716,Poptr1|353562,Poptr1|567417  
 Poptr1|572254  
 AT5G51220 Poptr1|675654  
 AT4G13180 Poptr1|571216  
 Poptr1|657402  
 AT3G05260,AT1G54870 Poptr1|729633  
 Poptr1|727521  
 Poptr1|352463,Poptr1|352464,Poptr1|561446,Poptr1|561445,Poptr1|576542,Poptr1|58043  
 Poptr1|102871  
 AT4G03140 Poptr1|572755,Poptr1|572761  
 Poptr1|352467,Poptr1|576543  
 Poptr1|590633  
 Poptr1|596170  
 AT3G51680 Poptr1|560966,Poptr1|577103



AT3G26770  
AT1G10310 Poptr1|703798  
Poptr1|591227  
Poptr1|579715  
Poptr1|107277  
Poptr1|666749,Poptr1|687833,Poptr1|575047,Poptr1|575446,Poptr1|666348  
Poptr1|109044  
AT3G29250,AT3G29260,AT2G47130,AT2G47120,AT2G47140,AT2G47150 Poptr1|572556  
Poptr1|106209  
Poptr1|563334  
Poptr1|674833,Poptr1|593773,Poptr1|594950,Poptr1|679903  
Poptr1|726630,Poptr1|719890  
AT3G03980,AT5G18210,AT3G04000 Poptr1|665443,Poptr1|730005  
AT3G42960 Poptr1|566373,Poptr1|564728  
Poptr1|653689  
Poptr1|560373  
AT1G52340 Poptr1|547844  
Poptr1|593655,Poptr1|594951  
Poptr1|590831,Poptr1|109039  
AT5G10050,AT5G65205 Poptr1|71695  
Poptr1|580625,Poptr1|355149  
AT3G26760 Poptr1|553102,Poptr1|572882  
AT1G62610,AT1G63380,AT3G55290,AT3G55310,AT3G46170,AT2G17845 Poptr1|701307  
AT3G23580 Poptr1|587028,Poptr1|354922  
AT5G40942,AT3G27060  
Poptr1|64960,Poptr1|742834  
Poptr1|590474,Poptr1|585190  
AT2G42110Poptr1|653491,Poptr1|701346  
AT3G05990 Poptr1|354444,Poptr1|566276  
Poptr1|104048  
AT3G19230 Poptr1|557381  
Poptr1|583217  
Poptr1|570927,Poptr1|595522,Poptr1|579625,Poptr1|592134,Poptr1|570922,Poptr1|594085  
Poptr1|585167  
AT4G30310  
AT3G17310 Poptr1|591765  
AT5G15380 Poptr1|641622  
AT5G14620  
AT4G31120Poptr1|593340,Poptr1|577779  
AT3G59780  
Poptr1|96851,Poptr1|573272,Poptr1|670589,Poptr1|574435,Poptr1|574415,Poptr1|580415,Poptr1|690288  
Poptr1|592426  
Poptr1|575846,Poptr1|584169,Poptr1|108861,Poptr1|570431  
AT5G04070,AT5G15940 Poptr1|65813  
Poptr1|350242,Poptr1|593549,Poptr1|593446,Poptr1|48733  
AT5G02540 Poptr1|685753  
AT1G64590  
AT4G09750 Poptr1|694644  
Poptr1|747379  
AT2G37540  
AT4G24050 Poptr1|554532,Poptr1|691057  
AT4G11410Poptr1|646635  
AT5G50130 Poptr1|355950  
Poptr1|595749  
Poptr1|570430  
AT4G23430,AT4G23420  
AT4G01050 Poptr1|684317,Poptr1|572375  
AT3G25480 Poptr1|553134  
AT3G58800 Poptr1|552253  
AT1G73930 Poptr1|661777,Poptr1|700815  
AT1G16705  
AT1G67220 Poptr1|556155  
AT1G79000,AT1G16710 Poptr1|704461  
AT1G55970,AT3G12980  
Poptr1|581105  
AT2G17510 Poptr1|349882  
AT3G55010 Poptr1|57186,Poptr1|552503  
Poptr1|560478  
AT1G51510 Poptr1|722954,Poptr1|691339  
AT4G05590,AT4G14695  
AT4G22310 Poptr1|568180  
AT5G43050  
Poptr1|699281  
AT5G09850 Poptr1|683988,Poptr1|743104  
AT3G45180  
Poptr1|680026  
AT5G42300 Poptr1|724996,Poptr1|682456  
Poptr1|664663  
AT2G20370 Poptr1|349101  
AT2G32750,AT2G32740,AT2G31990  
AT2G29040 Poptr1|54740

AT4G22580 Poptr1|554209,Poptr1|97361  
AT5G41250,AT1G63450 Poptr1|554352,Poptr1|548474  
AT4G13990 Poptr1|65041  
Poptr1|577331  
AT5G62220 Poptr1|570558,Poptr1|575713  
AT1G68470 Poptr1|584611,Poptr1|550349  
AT2G42700 Poptr1|732059  
Poptr1|56904  
AT4G08770,AT4G08780,AT3G49120,AT3G49110,AT3G32980,AT2G38390,AT2G38380  
AT5G39580,AT5G64120 Poptr1|577049  
AT3G50990  
Poptr1|548175,Poptr1|554620,Poptr1|567123  
Poptr1|106429  
Poptr1|596396  
AT5G66390 Poptr1|593892,Poptr1|655365  
Poptr1|588790  
AT4G21960 Poptr1|555323  
Poptr1|581477,Poptr1|593200  
Poptr1|583752,Poptr1|591108,Poptr1|593635,Poptr1|580292,Poptr1|353269,Poptr1|597420,Poptr1|56360  
4  
Poptr1|588791  
Poptr1|593266  
Poptr1|580434  
Poptr1|748430,Poptr1|639696,Poptr1|690824,Poptr1|547662,Poptr1|683538,Poptr1|555257,Poptr1|55525  
6,Poptr1|712777,Poptr1|712490  
Poptr1|547665  
AT4G16270 Poptr1|345188  
AT5G19890 Poptr1|711777  
AT5G42180 Poptr1|550845,Poptr1|741255  
Poptr1|570502  
AT5G14130 Poptr1|549713,Poptr1|742840  
Poptr1|558663  
Poptr1|571896,Poptr1|700084  
AT4G25980,AT1G77100  
AT1G68850 Poptr1|658994,Poptr1|686350  
AT5G19880  
AT5G06730,AT5G06720 Poptr1|735057  
AT4G26010,AT1G34510 Poptr1|571282  
Poptr1|562299,Poptr1|75463,Poptr1|562300,Poptr1|654548  
AT1G24110Poptr1|355029  
AT1G30870  
AT2G41480 Poptr1|560610  
Poptr1|104338,Poptr1|99333,Poptr1|590430,Poptr1|355422,Poptr1|105047  
AT2G18140,AT2G18150,AT4G36430  
AT5G05340 Poptr1|596948  
AT1G71695 Poptr1|714784,Poptr1|693059,Poptr1|714785  
AT3G21770,AT1G05260,AT4G11290 Poptr1|695794,Poptr1|679511,Poptr1|689736,Poptr1|562303  
Poptr1|563599,Poptr1|581130  
Poptr1|555260  
AT2G22420 Poptr1|695869,Poptr1|694306  
AT2G34060 Poptr1|586082,Poptr1|586081,Poptr1|545229  
AT1G49570 Poptr1|671404  
AT2G35380 Poptr1|580110,Poptr1|589973  
AT5G17820,AT3G03670  
Poptr1|562864  
AT5G22410 Poptr1|549004,Poptr1|582292,Poptr1|575500  
AT5G58400,AT5G58390  
Poptr1|734277  
Poptr1|75914,Poptr1|75913  
Poptr1|574645  
AT2G43480,AT5G24070 Poptr1|562200  
Poptr1|673338  
Poptr1|581842  
AT4G30170,AT2G18980 Poptr1|737716  
AT4G33420 Poptr1|546604  
AT1G14540,AT1G14550 Poptr1|49479,Poptr1|593058  
AT2G39040  
Poptr1|558843  
Poptr1|574519  
Poptr1|56894  
AT2G37130 Poptr1|589413  
AT3G17070  
AT2G24800,AT4G31760 Poptr1|578318,Poptr1|562023  
AT3G01190,AT5G15180 Poptr1|568220,Poptr1|743906,Poptr1|546361,Poptr1|555379  
Poptr1|688861,Poptr1|344335  
AT5G47000,AT4G17690 Poptr1|570048  
Poptr1|596949  
AT4G33870 Poptr1|349565,Poptr1|63993  
AT4G37530,AT4G37520,AT5G67400,AT3G49960 Poptr1|693605  
AT1G44970 Poptr1|559771,Poptr1|346771  
AT5G64100,AT5G64110  
AT1G05240,AT1G05250

AT3G42570 Poptr1|572769,Poptr1|728957  
Poptr1|595891  
AT3G42570 Poptr1|586900  
AT3G28200,AT5G40150 Poptr1|691540  
AT5G51890 Poptr1|575767  
Poptr1|62767,Poptr1|106430  
AT1G11925 Poptr1|582441,Poptr1|586538,Poptr1|586537,Poptr1|555457,Poptr1|555456,Poptr1|584703,Poptr1|58470  
1,Poptr1|584700,Poptr1|99326,Poptr1|588436,Poptr1|588432,Poptr1|584702  
AT5G55110,AT4G26880,AT1G50720 Poptr1|65399,Poptr1|103972,Poptr1|55808  
AT1G50650 Poptr1|550098  
AT1G53130 Poptr1|579454,Poptr1|568893  
Poptr1|587330  
AT3G17040 Poptr1|698317  
AT5G27630,AT3G05420 Poptr1|744502  
Poptr1|563658  
AT5G04420 Poptr1|698694  
Poptr1|563656  
AT3G04950 Poptr1|699811  
AT3G48820 Poptr1|570329,Poptr1|688555  
AT1G08660 Poptr1|572878  
AT1G01470  
AT2G46140 Poptr1|709954,Poptr1|731200  
AT2G21010,AT2G20990 Poptr1|686657,Poptr1|546230  
Poptr1|595876  
AT2G21040  
AT1G05500  
AT5G04220 Poptr1|55604,Poptr1|353374  
AT5G11100 Poptr1|578236  
Poptr1|669721,Poptr1|669720,Poptr1|704745  
AT1G20080 Poptr1|652105,Poptr1|692983  
AT5G08335,AT5G23320 Poptr1|75915,Poptr1|51769  
AT1G15230 Poptr1|553722  
AT1G13790 Poptr1|64379,Poptr1|724403  
AT3G29375  
AT4G01780,AT3G48670,AT3G12550 Poptr1|659673  
AT4G00380,AT1G15910,AT1G80790 Poptr1|343830  
AT2G16490  
AT4G01180,AT5G59390  
AT1G28340 Poptr1|671009,Poptr1|555769  
Poptr1|345241  
AT1G25570 Poptr1|658936  
AT4G30690,AT2G24060 Poptr1|717828,Poptr1|669557  
AT5G28660,AT2G47370,AT2G16760 Poptr1|572611  
AT1G50080  
AT5G14140 Poptr1|681590,Poptr1|641822  
AT1G31440 Poptr1|343530,Poptr1|590138  
AT4G34660 Poptr1|694190,Poptr1|557182  
AT4G39020 Poptr1|674790  
AT4G18060 Poptr1|727878,Poptr1|746791  
AT1G04880 Poptr1|49261,Poptr1|736102  
AT1G76110 Poptr1|559898  
AT1G55650,AT3G13350 Poptr1|582531  
AT1G62530,AT1G12120 Poptr1|693507,Poptr1|704260  
Poptr1|73172  
Poptr1|586451  
AT1G21630 Poptr1|558791  
Poptr1|105151  
Poptr1|346568,Poptr1|705246  
AT1G20760  
AT4G30010 Poptr1|652865,Poptr1|579034  
AT3G25610,AT1G13210,AT1G26130,AT1G68710 Poptr1|566702,Poptr1|720837  
Poptr1|75315  
Poptr1|63327  
AT1G59820 Poptr1|345553  
Poptr1|577193,Poptr1|560995  
AT5G04930 Poptr1|353204,Poptr1|725358,Poptr1|697016  
Poptr1|596497  
Poptr1|569838  
Poptr1|645785  
AT3G27870 Poptr1|64760  
Poptr1|109164  
AT3G18700 Poptr1|577554  
AT1G17500,AT1G72700,AT1G54280,AT3G13900  
Poptr1|553529,Poptr1|592804,Poptr1|579214,Poptr1|597669  
AT5G44240 Poptr1|741584  
AT3G16200 Poptr1|685010,Poptr1|48895  
Poptr1|682403  
AT1G48170  
AT4G14950,AT1G05360 Poptr1|726583,Poptr1|696428,Poptr1|590667  
Poptr1|595625,Poptr1|595609,Poptr1|570835

AT1G76660 Poptr1|652293,Poptr1|550698  
AT5G44740 Poptr1|350452  
AT1G05060 Poptr1|572996  
AT2G30700 Poptr1|562195,Poptr1|103367,Poptr1|703475  
Poptr1|647574  
AT1G61900 Poptr1|647573,Poptr1|568012  
AT5G58020 Poptr1|344481,Poptr1|578768  
AT5G63200 Poptr1|699392  
AT5G03420 Poptr1|667876,Poptr1|589483,Poptr1|667875  
AT4G32810  
Poptr1|352771,Poptr1|578053  
AT1G03530 Poptr1|571778,Poptr1|580360  
AT4G03380  
AT1G23760,AT1G70370  
AT1G60390 Poptr1|345549  
Poptr1|566765,Poptr1|355872  
AT3G07080 Poptr1|591064,Poptr1|573321  
AT4G17330 Poptr1|553878  
AT3G17140,AT1G47960 Poptr1|595854,Poptr1|557561,Poptr1|658101  
Poptr1|559402  
Poptr1|347102  
AT2G21790  
Poptr1|686016,Poptr1|51760  
AT1G69750,AT1G66590 Poptr1|705790  
AT1G67760 Poptr1|675198  
AT3G11830,Poptr1|721399,Poptr1|686603,Poptr1|703530,Poptr1|586240  
AT5G20890  
AT3G18190 Poptr1|661718,Poptr1|574956  
AT3G03960 Poptr1|573918,Poptr1|729996  
AT3G02530,AT5G16070 Poptr1|690094  
AT5G26360 Poptr1|573556,Poptr1|714540  
AT4G08640  
Poptr1|706842,Poptr1|589426  
AT1G24510 Poptr1|726172,Poptr1|565108  
AT3G20050 Poptr1|692452,Poptr1|689533  
AT5G10710 Poptr1|674435,Poptr1|578394  
Poptr1|674434  
AT4G16340  
Poptr1|584760  
Poptr1|584759  
AT4G11230  
AT1G09090 Poptr1|581871  
AT1G19230  
AT5G51060,AT4G25090  
AT5G07390  
Poptr1|570798  
AT1G64060 Poptr1|691108,Poptr1|350284  
Poptr1|575496,Poptr1|570393  
AT5G47910 Poptr1|712105,Poptr1|548137  
AT5G60010,AT3G45810 Poptr1|58173,Poptr1|351882  
AT2G31510,AT1G05890 Poptr1|695779,Poptr1|741450  
AT5G63730,AT5G63750,AT5G63760,AT5G08730  
AT3G27720,AT3G27710  
AT1G65430 Poptr1|724340,Poptr1|686426  
AT4G34370,AT2G16090 Poptr1|556428,Poptr1|697303  
AT2G31760,AT2G31770,AT2G31780  
AT1G05880  
Poptr1|551904,Poptr1|347704  
AT1G04190 Poptr1|564869,Poptr1|658487  
AT2G17350 Poptr1|54242  
AT1G56450 Poptr1|561786,Poptr1|689020  
AT5G06930  
Poptr1|565057,Poptr1|697929  
AT3G57780,AT2G42320 Poptr1|734954,Poptr1|583606  
AT5G43230  
AT5G43220  
AT3G01810 Poptr1|706951  
Poptr1|662795,Poptr1|590116,Poptr1|735427,Poptr1|693546  
AT3G48960,AT3G49010,AT5G23900  
AT1G17860 Poptr1|590804,Poptr1|61167,Poptr1|555578  
AT1G73330,AT1G73325,AT1G72290 Poptr1|574326  
AT1G73260  
Poptr1|746483,Poptr1|713741,Poptr1|555576  
AT5G03080  
Poptr1|667764,Poptr1|689372  
AT3G16565 Poptr1|697857  
Poptr1|586918  
AT5G19630 Poptr1|684701,Poptr1|547690  
AT4G19050  
Poptr1|702972  
AT5G45550  
AT5G20430,AT5G20440 Poptr1|689347

AT5G22120 Poptr1|650410,Poptr1|691322,Poptr1|581711  
AT5G63910 Poptr1|592576,Poptr1|654683,Poptr1|678386  
AT1G49290,AT5G13620 Poptr1|567544,Poptr1|353443  
Poptr1|589884  
Poptr1|591625  
AT3G07760 Poptr1|700622  
AT1G66790,AT5G53740,AT5G52975,AT5G52965,AT2G27315,AT4G35165,AT3G48675,AT5G53905,AT5G54062,AT5  
G51105,AT5G48210 Poptr1|588888  
AT5G61530 Poptr1|742638  
AT1G22730 Poptr1|551266,Poptr1|559445  
AT4G24800 Poptr1|575276,Poptr1|570193  
AT5G63190,AT3G48390  
AT3G12070,AT5G12210  
Poptr1|571856  
AT5G48160,AT3G07780 Poptr1|573078,Poptr1|552690  
Poptr1|549294  
AT3G63500 Poptr1|649995  
AT1G14740 Poptr1|719813  
AT5G42670,AT5G52070 Poptr1|657261  
AT3G57560 Poptr1|679371,Poptr1|586368,Poptr1|672643  
Poptr1|679312  
Poptr1|568725,Poptr1|555689  
Poptr1|568724  
AT3G56770,AT2G41130 Poptr1|57918,Poptr1|351394  
AT2G40200 Poptr1|656276,Poptr1|567247  
AT1G68810 Poptr1|354125,Poptr1|55287  
Poptr1|692616  
AT3G25710  
AT2G26500 Poptr1|644167,Poptr1|591873,Poptr1|673024,Poptr1|673134,Poptr1|744203  
AT1G14150 Poptr1|682616  
AT5G27300,AT2G27790 Poptr1|561591  
AT1G31680,AT1G31670  
AT1G62810,AT3G43670 Poptr1|744004  
Poptr1|591022  
AT4G12270  
AT4G14940 Poptr1|566257  
Poptr1|108232,Poptr1|345402  
AT1G31690,AT1G31710  
Poptr1|744008  
AT4G12280,AT4G12290  
AT2G35612 Poptr1|596850  
Poptr1|658535  
Poptr1|726562  
Poptr1|579288  
AT1G08390 Poptr1|553290,Poptr1|594853  
AT5G42960,AT1G45170 Poptr1|573245  
Poptr1|76271  
Poptr1|586940,Poptr1|582096,Poptr1|568971  
AT4G04990  
AT5G54300  
AT1G11230,AT1G11220,AT1G61260,AT1G11210 Poptr1|555510,Poptr1|687497  
Poptr1|355156,Poptr1|580599  
AT1G62045 Poptr1|104828,Poptr1|568029  
AT5G27860 Poptr1|671710  
Poptr1|671711  
AT3G52640 Poptr1|552886,Poptr1|714210  
AT5G47680 Poptr1|734461,Poptr1|560099  
Poptr1|684132  
Poptr1|589701,Poptr1|592767,Poptr1|594270,Poptr1|594271,Poptr1|592769,Poptr1|104520  
AT3G13860  
Poptr1|554803,Poptr1|640006  
AT5G18820 Poptr1|575628,Poptr1|594269  
Poptr1|597443,Poptr1|679443,Poptr1|699240  
AT2G28000 Poptr1|558284,Poptr1|741966  
AT2G33210,AT3G23990  
AT1G26230 Poptr1|566728  
AT3G13470,AT1G55490  
AT5G56500 Poptr1|62674,Poptr1|712746  
AT2G32280 Poptr1|654562,Poptr1|670143,Poptr1|741318  
AT1G11500  
AT4G21310 Poptr1|568386,Poptr1|713627  
AT1G77620 Poptr1|106015,Poptr1|347263,Poptr1|716643  
AT3G63000,AT2G47970 Poptr1|731936,Poptr1|644960  
AT5G18920  
Poptr1|657936,Poptr1|345581  
Poptr1|553080  
AT4G32180 Poptr1|572015,Poptr1|688496,Poptr1|687798  
AT1G60440 Poptr1|696311,Poptr1|697996  
AT2G28100 Poptr1|723629  
Poptr1|356335  
AT2G25270  
AT1G80540

AT2G12400  
Poptr1|705530,Poptr1|561940,Poptr1|669107,Poptr1|704733,Poptr1|60903,Poptr1|738099  
AT5G67550  
Poptr1|562202  
AT1G71110 Poptr1|566526  
AT5G59460 Poptr1|650247  
AT5G10190  
AT2G18590  
AT1G78130 Poptr1|75730,Poptr1|582638,Poptr1|103774  
AT4G36790 Poptr1|563099  
AT5G27680 Poptr1|97739  
AT2G43560 Poptr1|562188,Poptr1|594616  
AT4G36970 Poptr1|596190,Poptr1|562968,Poptr1|72003  
AT1G45207 Poptr1|342601,Poptr1|59466  
AT5G61310,AT2G47380 Poptr1|103505,Poptr1|348347,Poptr1|664345  
AT1G80130,AT4G32340  
Poptr1|561898  
Poptr1|657317  
AT5G20190 Poptr1|702309,Poptr1|695509  
AT4G17940 Poptr1|590027  
Poptr1|679480,Poptr1|679477  
AT1G22800 Poptr1|740809  
AT5G36270,AT1G75270,AT1G19550,AT1G19570 Poptr1|563837,Poptr1|687372  
AT5G16710 Poptr1|594196,Poptr1|579782,Poptr1|343092  
Poptr1|586256  
AT3G59660 Poptr1|582752  
AT1G34430 Poptr1|740651,Poptr1|574292  
AT3G25860 Poptr1|566637,Poptr1|720668  
Poptr1|556163  
AT3G02420 Poptr1|556162,Poptr1|690083  
AT1G12550 Poptr1|63633  
Poptr1|588703  
AT5G28310,AT2G45630 Poptr1|710282,Poptr1|700176,Poptr1|56985,Poptr1|670298,Poptr1|347899  
Poptr1|691269  
AT1G79870 Poptr1|693696  
Poptr1|548548,Poptr1|343590  
AT2G16910 Poptr1|354807  
AT1G12860 Poptr1|662221  
AT5G10570,AT5G65640 Poptr1|551685  
AT3G26744  
Poptr1|662220  
Poptr1|561553  
AT5G27200,AT3G05020,AT1G54630,AT1G54580 Poptr1|699798,Poptr1|595508  
AT4G25050 Poptr1|662211,Poptr1|575440  
AT4G05010,AT4G21510  
AT1G61340 Poptr1|647704,Poptr1|568300  
Poptr1|99577  
Poptr1|554007  
Poptr1|578351,Poptr1|568752,Poptr1|591171,Poptr1|554008,Poptr1|594755  
Poptr1|572954  
AT5G48410,AT5G48400,AT3G07520,AT3G04110  
AT2G29100,AT2G29110,AT2G29120  
Poptr1|578349,Poptr1|353073,Poptr1|353065,Poptr1|353063,Poptr1|593999,Poptr1|585179,Poptr1|10583  
9,Poptr1|578359,Poptr1|108701,Poptr1|578353,Poptr1|578346,Poptr1|101745,Poptr1|591165,Poptr1|578342,Poptr1|5  
78352  
AT2G24710,AT2G24720,AT4G31710,AT5G27100  
Poptr1|586469  
Poptr1|545225,Poptr1|693965,Poptr1|568759,Poptr1|568762,Poptr1|568757,Poptr1|555720,Poptr1|99970,  
Poptr1|568753,Poptr1|591355,Poptr1|591955,Poptr1|591952,Poptr1|76113  
AT2G32400 Poptr1|711342  
Poptr1|561417  
AT1G42540 Poptr1|346558,Poptr1|559972  
Poptr1|107332  
Poptr1|103543,Poptr1|578350  
AT2G17260,AT4G35290 Poptr1|54246  
Poptr1|582774  
Poptr1|594754,Poptr1|99575,Poptr1|578647  
Poptr1|558795  
Poptr1|65570,Poptr1|550283,Poptr1|65567,Poptr1|65569,Poptr1|65563,Poptr1|550284,Poptr1|574361  
AT1G05200,AT2G32390 Poptr1|552797,Poptr1|572950  
AT5G11180,AT5G11210  
Poptr1|101740  
Poptr1|581992  
AT3G51480 Poptr1|558796  
Poptr1|572952  
Poptr1|554947  
AT1G05805 Poptr1|592955,Poptr1|343039,Poptr1|552821  
Poptr1|549344,Poptr1|557744  
AT2G43140  
AT2G42280 Poptr1|60892  
AT5G24740 Poptr1|65835  
AT4G27310,AT5G54470 Poptr1|571834

Poptr1|582065,Poptr1|568988  
Poptr1|544928,Poptr1|544929  
AT3G21890,AT4G15248 Poptr1|594447,Poptr1|562313  
Poptr1|585764,Poptr1|595357,Poptr1|595359  
AT1G78770 Poptr1|595358,Poptr1|585763,Poptr1|585761,Poptr1|568795  
AT2G36480  
AT2G36485 Poptr1|589570  
AT5G41960  
Poptr1|691047,Poptr1|693347  
Poptr1|646817  
AT5G67220 Poptr1|719210  
Poptr1|581168  
AT1G67340 Poptr1|554777,Poptr1|548031  
Poptr1|570255  
AT5G50450  
AT5G47930  
Poptr1|554670,Poptr1|548120  
AT2G45710,AT3G61110 Poptr1|561249  
AT4G35905 Poptr1|666183  
AT1G51100Poptr1|661082  
AT3G14880 Poptr1|99830  
AT1G55710,AT4G18690,AT5G45830,AT4G18660,AT4G18680  
AT1G15320  
Poptr1|654715  
AT4G18650 Poptr1|555665  
AT5G22090 Poptr1|548986  
AT2G20980 Poptr1|649220  
AT5G61760,AT5G07370 Poptr1|666792,Poptr1|662275  
AT2G40316 Poptr1|353726  
AT1G11860Poptr1|568049,Poptr1|705169  
Poptr1|585293  
Poptr1|658959,Poptr1|656751,Poptr1|97519  
AT1G68760 Poptr1|748926,Poptr1|564470  
AT5G35430 Poptr1|591556,Poptr1|351575,Poptr1|702295  
AT1G61280 Poptr1|581146,Poptr1|591815,Poptr1|551932  
AT3G55590  
Poptr1|576935  
AT2G39770  
AT4G30570  
Poptr1|560814  
Poptr1|687344,Poptr1|656143,Poptr1|655658  
Poptr1|104382  
AT1G48600,AT3G18000 Poptr1|355491,Poptr1|699523  
AT1G73600 Poptr1|574999,Poptr1|666298  
AT5G26940 Poptr1|671736  
AT5G43340  
Poptr1|581082  
AT4G08895 Poptr1|561001  
AT5G43370,AT5G43350,AT5G43360  
Poptr1|585992,Poptr1|597507,Poptr1|559687,Poptr1|559686  
AT2G38940,AT3G54700 Poptr1|342244  
Poptr1|594159,Poptr1|663464,Poptr1|347277  
AT4G08878  
Poptr1|559688,Poptr1|579921  
Poptr1|571684  
AT2G32830 Poptr1|675756,Poptr1|588955,Poptr1|658370,Poptr1|641904  
Poptr1|586600,Poptr1|101325  
Poptr1|651389  
Poptr1|100144  
AT1G20860,AT1G76430 Poptr1|550732,Poptr1|73199  
AT4G02350 Poptr1|342889,Poptr1|664416  
AT3G56640 Poptr1|652542  
AT5G19875  
AT2G31940 Poptr1|558142,Poptr1|704678  
Poptr1|547644,Poptr1|555243  
AT1G27460 Poptr1|572035,Poptr1|347585  
Poptr1|354603,Poptr1|54970  
AT4G28600 Poptr1|573405,Poptr1|645586  
AT2G43040 Poptr1|710743  
Poptr1|553332  
AT5G66030 Poptr1|71876  
Poptr1|562806  
AT5G08290 Poptr1|654974  
AT4G29840,AT1G72810 Poptr1|592721,Poptr1|703921  
AT5G12860 Poptr1|722920,Poptr1|706278  
AT5G64290 Poptr1|683986,Poptr1|577371  
AT5G64280  
AT1G47560 Poptr1|644179,Poptr1|677764  
Poptr1|677766  
AT1G47550 Poptr1|644180  
Poptr1|677765  
Poptr1|644178

Poptr1|644177  
AT4G19490 Poptr1|727341,Poptr1|65724  
AT3G25410 Poptr1|573210  
AT4G22840,AT4G12030  
Poptr1|587171,Poptr1|63651,Poptr1|350129  
AT2G17975 Poptr1|593856  
AT2G18290 Poptr1|53386,Poptr1|356966  
AT2G37220,AT3G53460 Poptr1|689385,Poptr1|58106  
Poptr1|658070,Poptr1|657316  
AT2G18510  
AT5G50250,AT4G24770 Poptr1|699399,Poptr1|700968,Poptr1|706850  
AT3G52150 Poptr1|722723  
AT5G03580  
AT1G34140  
AT3G46020 Poptr1|641237  
AT3G19350  
AT3G52380 Poptr1|576481,Poptr1|561161  
Poptr1|104548,Poptr1|679253,Poptr1|686078  
AT1G71770,AT1G22760  
Poptr1|559435,Poptr1|559437,Poptr1|551276  
AT5G19030  
AT3G16380  
AT2G23350  
Poptr1|557410,Poptr1|691734,Poptr1|703134,Poptr1|692536  
AT2G36660  
AT1G60000  
AT4G09040 Poptr1|716445  
AT1G01080 Poptr1|731454  
AT4G34110,AT1G49760,AT2G15500  
AT2G35410 Poptr1|590020  
AT1G66810 Poptr1|658834  
AT1G68200 Poptr1|105162,Poptr1|108407,Poptr1|582882,Poptr1|584936  
Poptr1|673888,Poptr1|349728  
AT4G16566  
AT5G55490 Poptr1|552875  
AT5G58890 Poptr1|64145,Poptr1|570375,Poptr1|64959  
AT2G44090,AT3G59910 Poptr1|746305,Poptr1|562074  
AT3G56500 Poptr1|578449,Poptr1|584024  
AT3G15353 Poptr1|568895,Poptr1|670071  
Poptr1|583768  
Poptr1|594905  
AT5G20990 Poptr1|556880  
AT2G11810  
Poptr1|694952,Poptr1|689075  
AT4G31780  
AT5G20410 Poptr1|60912,Poptr1|578871  
Poptr1|555977  
AT1G17270,AT5G50420 Poptr1|684993  
AT1G53770  
AT2G40190 Poptr1|575325,Poptr1|570235  
Poptr1|348218  
Poptr1|644721  
AT4G01660 Poptr1|644720  
AT1G50460,AT3G20040 Poptr1|48954,Poptr1|54684  
AT1G47840 Poptr1|715434  
AT2G19860,AT4G29130 Poptr1|689119  
AT4G37840 Poptr1|53450  
Poptr1|683774  
AT5G42750 Poptr1|591927,Poptr1|347664  
AT1G30380 Poptr1|654145,Poptr1|737207  
Poptr1|550959  
Poptr1|596961  
AT1G73040 Poptr1|570465  
Poptr1|550960,Poptr1|72968  
AT1G19715 Poptr1|710793,Poptr1|559780  
AT1G09040,AT1G09050,AT1G55050 Poptr1|570813,Poptr1|97729  
Poptr1|581796,Poptr1|565734  
AT2G47820  
Poptr1|730490  
AT4G03430  
AT2G41620,AT3G57350 Poptr1|687663,Poptr1|580574  
AT1G64720 Poptr1|727299,Poptr1|642519  
AT1G55960,AT3G13062 Poptr1|582207  
AT5G54170  
Poptr1|642520  
AT4G14500,AT3G23080 Poptr1|593457,Poptr1|564926  
Poptr1|574668,Poptr1|569613  
AT5G16020 Poptr1|556158  
Poptr1|574089  
AT5G27760,AT3G05550 Poptr1|591388,Poptr1|729527,Poptr1|704402  
AT3G22450 Poptr1|590379,Poptr1|595528,Poptr1|564844  
AT1G08845 Poptr1|570914



AT3G20230 Poptr1|574253,Poptr1|678135  
AT2G37790,AT2G37770,AT3G53880 Poptr1|717244  
AT2G37760 Poptr1|560819,Poptr1|579618,Poptr1|351819,Poptr1|576840  
Poptr1|658639,Poptr1|564758  
AT5G01670  
AT2G21250,AT2G21260 Poptr1|572871,Poptr1|697224  
Poptr1|345668  
Poptr1|577490,Poptr1|735603  
AT5G62420 Poptr1|356790  
AT1G59950,AT1G59960 Poptr1|51795,Poptr1|354843  
AT2G17705 Poptr1|679078  
AT4G13400 Poptr1|578418  
AT1G03350 Poptr1|577411,Poptr1|578459,Poptr1|579423  
AT4G13110 Poptr1|574832,Poptr1|565677,Poptr1|565291,Poptr1|565678  
Poptr1|579427  
AT5G18790,AT3G06320 Poptr1|657961  
Poptr1|109143,Poptr1|653086  
Poptr1|663988  
Poptr1|735733  
AT2G29650 Poptr1|64286  
AT2G38060 Poptr1|576921  
Poptr1|644469  
AT3G46980 Poptr1|64302  
AT4G00370 Poptr1|663989  
AT5G20380 Poptr1|578861,Poptr1|583656  
AT5G44370 Poptr1|556766  
Poptr1|579400  
AT5G08415 Poptr1|96821,Poptr1|56860  
AT2G20860 Poptr1|562739,Poptr1|558638  
AT1G54920 Poptr1|595592  
AT1G51710,AT3G21280 Poptr1|597670,Poptr1|592725  
AT2G37730 Poptr1|105341,Poptr1|351808,Poptr1|576822  
AT1G07850 Poptr1|64443  
AT1G01570,AT4G00300  
AT5G12460 Poptr1|557867,Poptr1|49046  
AT3G11420 Poptr1|724662,Poptr1|344991  
AT4G11350,AT4G23490,AT5G41460 Poptr1|693416,Poptr1|548430  
AT4G15240 Poptr1|703439  
Poptr1|591329,Poptr1|570354,Poptr1|575458  
AT1G33250 Poptr1|550511,Poptr1|569223  
AT1G05280 Poptr1|594444  
AT4G28200 Poptr1|582815,Poptr1|71970,Poptr1|53325  
AT3G11600,AT5G06270 Poptr1|576538,Poptr1|561441  
Poptr1|567906  
Poptr1|648965,Poptr1|679905  
AT5G22270 Poptr1|587703  
AT1G73430 Poptr1|723872  
Poptr1|589352  
AT3G55340 Poptr1|567477  
AT1G21790 Poptr1|643617,Poptr1|559239  
AT2G03780 Poptr1|659024  
Poptr1|560550,Poptr1|563707  
AT1G13245 Poptr1|646075,Poptr1|589832  
AT3G53232  
AT2G39705 Poptr1|563919,Poptr1|659662  
AT2G36985 Poptr1|589462  
Poptr1|669282  
AT2G29125,AT1G07490 Poptr1|558044,Poptr1|549147  
AT5G59510 Poptr1|589934  
AT1G67700 Poptr1|682556  
AT2G01590 Poptr1|698179  
Poptr1|65108  
AT1G80570 Poptr1|668368  
AT5G20045 Poptr1|581137,Poptr1|595993,Poptr1|563533  
AT4G28070 Poptr1|578686  
AT4G30490 Poptr1|590737  
AT5G21070 Poptr1|594926,Poptr1|47143  
AT1G79730 Poptr1|553771,Poptr1|64078  
Poptr1|545830,Poptr1|58832  
AT4G08990,AT4G14140,AT4G13610,AT5G49160  
AT1G68795  
AT1G49005,AT1G73965 Poptr1|564482,Poptr1|566680,Poptr1|569854  
AT3G31960 Poptr1|569118  
AT4G27040 Poptr1|569115,Poptr1|569117,Poptr1|56821  
AT5G04520 Poptr1|687414

Poptr1|356838  
AT5G10080 Poptr1|694330  
AT4G35880 Poptr1|696001  
AT3G51340,AT3G51350,AT3G51330,AT3G51360,AT2G17760  
AT4G27630,AT1G64990 Poptr1|574002,Poptr1|730225  
AT4G30790 Poptr1|685620,Poptr1|58737  
AT4G19880,AT5G45020,AT5G44990 Poptr1|575616  
AT5G44000 Poptr1|665075  
AT2G04460,AT2G10090  
Poptr1|104789,Poptr1|107809,Poptr1|97921,Poptr1|584908,Poptr1|583425,Poptr1|591083,Poptr1|571656,  
Poptr1|108916,Poptr1|101335,Poptr1|576945  
AT4G16520 Poptr1|712083,Poptr1|581249,Poptr1|591664,Poptr1|552018  
AT1G62040  
AT4G04620,AT4G21980  
AT3G06420  
AT2G45170  
AT3G60640  
AT2G05630 Poptr1|47678,Poptr1|711392  
Poptr1|647550,Poptr1|687464  
AT3G15580 Poptr1|659176,Poptr1|656570,Poptr1|684246  
Poptr1|685088  
Poptr1|588255  
AT5G61060  
AT5G61070  
AT5G61050 Poptr1|562478  
AT3G18520 Poptr1|355610  
AT1G01920 Poptr1|572191  
Poptr1|546298  
AT1G49930 Poptr1|562836  
AT1G50200 Poptr1|558710  
AT5G22800 Poptr1|697154  
Poptr1|665301  
AT3G04500  
Poptr1|662977  
Poptr1|592256,Poptr1|595414,Poptr1|354548  
AT3G23060 Poptr1|595416  
AT1G06770,AT2G30580 Poptr1|692877,Poptr1|559646  
AT4G24120 Poptr1|48647,Poptr1|683637  
AT5G41000,AT3G27020 Poptr1|707057  
AT5G24380  
Poptr1|588696  
AT5G53550 Poptr1|569642  
Poptr1|586774  
AT5G45450,AT3G17650,AT1G48370 Poptr1|545067  
AT1G65730  
Poptr1|569651  
Poptr1|51782  
Poptr1|585864,Poptr1|592944,Poptr1|594013,Poptr1|585868,Poptr1|585857,Poptr1|587762,Poptr1|10509  
8,Poptr1|585859,Poptr1|585860  
Poptr1|555566,Poptr1|584191,Poptr1|592945  
Poptr1|585867,Poptr1|104441,Poptr1|585866,Poptr1|592948  
AT4G32570 Poptr1|578148,Poptr1|352858  
AT1G67500 Poptr1|729606  
Poptr1|570839  
AT5G53270,AT5G53260  
AT5G27980  
AT1G03120  
Poptr1|680323  
AT3G22500,AT3G22490  
AT1G62840,AT1G12320  
Poptr1|554240,Poptr1|97329  
AT5G62280 Poptr1|57762  
AT3G60780,AT2G45360 Poptr1|581836,Poptr1|572101,Poptr1|552041  
Poptr1|572102  
AT2G05320 Poptr1|664884  
AT3G24880,AT3G24870 Poptr1|348980  
AT1G61690 Poptr1|544965,Poptr1|55793  
AT3G01980 Poptr1|583551,Poptr1|683958  
AT5G48420,AT4G34630 Poptr1|556522,Poptr1|697245  
AT3G16480,AT1G51980 Poptr1|355022,Poptr1|720352,Poptr1|683777  
AT1G01120,Poptr1|57115,Poptr1|348148  
Poptr1|49037,Poptr1|558115  
AT4G34510,AT2G16280  
AT1G71160,Poptr1|548746  
Poptr1|587394  
Poptr1|99217  
AT2G26250 Poptr1|561555  
Poptr1|649406,Poptr1|546072  
Poptr1|575722,Poptr1|666947  
AT3G52160 Poptr1|351726  
AT5G43760,AT1G04220 Poptr1|106935,Poptr1|566163,Poptr1|564905  
AT1G07720,AT2G28630

Poptr1|659769,Poptr1|588598,Poptr1|588807,Poptr1|592168  
Poptr1|551110,Poptr1|559624  
AT1G19440 Poptr1|573414  
Poptr1|566167,Poptr1|747725,Poptr1|588631,Poptr1|566171,Poptr1|101178,Poptr1|581148,Poptr1|10684  
3,Poptr1|658448  
Poptr1|592169  
AT1G25450,AT1G68530 Poptr1|656812,Poptr1|566626  
Poptr1|592166,Poptr1|592171,Poptr1|665835  
AT5G04530 Poptr1|656018,Poptr1|588594,Poptr1|659771  
Poptr1|570777  
AT2G26640 Poptr1|561843,Poptr1|737124  
AT3G10280,AT2G46720  
AT5G49070  
AT2G15090,AT4G34250,AT4G34520  
AT5G03160 Poptr1|701518  
AT4G20310 Poptr1|63258,Poptr1|350494  
AT1G66900  
AT1G32190 Poptr1|739949  
AT1G13610 Poptr1|696600,Poptr1|55306  
Poptr1|349932  
AT3G01690,AT5G14390 Poptr1|64861  
AT3G30380 Poptr1|745742,Poptr1|584638  
AT4G24760 Poptr1|106043,Poptr1|570183,Poptr1|733460  
AT2G24320,AT4G31020 Poptr1|717673,Poptr1|669629  
AT5G38220 Poptr1|97124,Poptr1|589685,Poptr1|648044  
Poptr1|554064  
AT4G02715 Poptr1|694705,Poptr1|551156  
AT3G50685 Poptr1|566944,Poptr1|719476  
Poptr1|563002,Poptr1|696041  
Poptr1|107807,Poptr1|575927,Poptr1|552910,Poptr1|596389,Poptr1|591911,Poptr1|703103,Poptr1|55291  
2,Poptr1|546519,Poptr1|589135,Poptr1|591908,Poptr1|596393,Poptr1|590497,Poptr1|552911,Poptr1|343063,Poptr1|5  
87175,Poptr1|552906,Poptr1|645189,Poptr1|591913,Poptr1|677810,Poptr1|551871  
AT2G26560  
AT4G37070,AT4G37060,AT5G43590  
Poptr1|738209,Poptr1|673182,Poptr1|573681,Poptr1|573660,Poptr1|738192,Poptr1|583722,Poptr1|57365  
4,Poptr1|573676  
Poptr1|347677  
Poptr1|573651,Poptr1|573675  
AT4G37050 Poptr1|562990  
Poptr1|596392  
AT1G13980 Poptr1|577592,Poptr1|577593  
AT5G39500  
Poptr1|592581  
AT5G19610 Poptr1|578433  
AT2G28070 Poptr1|723618,Poptr1|745926  
Poptr1|562568  
AT1G51500,AT3G21090 Poptr1|64458,Poptr1|557874  
AT1G17840 Poptr1|746499,Poptr1|584512  
AT1G51460 Poptr1|64459,Poptr1|54678  
Poptr1|576366,Poptr1|576365  
Poptr1|583998,Poptr1|586105  
Poptr1|65126,Poptr1|65124,Poptr1|51706,Poptr1|103707  
AT3G21080  
Poptr1|594397  
AT5G11780Poptr1|561678  
AT5G01770,AT3G08850 Poptr1|351970,Poptr1|701666  
AT3G29780 Poptr1|583838,Poptr1|596251,Poptr1|589031,Poptr1|676990,Poptr1|583841  
AT5G19430,AT5G12310 Poptr1|641460,Poptr1|722674  
Poptr1|552296  
Poptr1|688189  
Poptr1|709112  
AT2G31240 Poptr1|72872  
Poptr1|640313  
AT1G27500 Poptr1|733302,Poptr1|355879  
AT4G10840 Poptr1|684837  
AT3G27960 Poptr1|696682  
Poptr1|552297  
AT4G31270 Poptr1|745358,Poptr1|586353  
AT4G23860  
Poptr1|548339,Poptr1|712282  
Poptr1|551190,Poptr1|559539  
AT3G11680Poptr1|352144  
AT4G17585  
Poptr1|104460  
Poptr1|710312  
AT4G00910 Poptr1|712664  
AT5G46600,AT5G46610,AT4G17970 Poptr1|589990  
AT1G08430,AT1G08440,AT2G27240  
Poptr1|101813,Poptr1|591345,Poptr1|591346,Poptr1|64181,Poptr1|64177,Poptr1|548995,Poptr1|558209  
AT3G25545 Poptr1|564440,Poptr1|687206  
Poptr1|648327,Poptr1|580743  
AT5G15930,AT3G02460 Poptr1|580747

AT3G20070 Poptr1|697565  
AT1G79750 Poptr1|691291,Poptr1|711993  
Poptr1|108035  
AT5G11670,AT5G25880  
AT2G13560 Poptr1|692496,Poptr1|591812  
AT4G00570 Poptr1|552135,Poptr1|700205  
AT2G19900  
Poptr1|689114  
Poptr1|689007,Poptr1|561733  
Poptr1|595343  
Poptr1|669928  
AT1G51450 Poptr1|549232,Poptr1|697554  
Poptr1|350443,Poptr1|693331,Poptr1|586732  
Poptr1|556851,Poptr1|591051  
Poptr1|104849  
AT4G34220,AT2G15300 Poptr1|49302  
AT5G53890 Poptr1|579445,Poptr1|568873  
Poptr1|592793,Poptr1|581966  
Poptr1|591266  
AT3G03770 Poptr1|738514,Poptr1|571257  
Poptr1|350339,Poptr1|593276  
AT5G23400  
Poptr1|349292  
AT3G17840,AT1G48480 Poptr1|700875,Poptr1|345787  
AT2G27060 Poptr1|59854  
Poptr1|588832  
Poptr1|585070  
Poptr1|587895,Poptr1|594274,Poptr1|594276,Poptr1|596213,Poptr1|594268  
AT1G53440,AT1G53430 Poptr1|588977,Poptr1|585507  
AT2G33030  
Poptr1|596156  
AT2G14440,AT2G14510,AT1G07550,AT3G46420,AT3G46340,AT3G46400,AT3G46370,AT3G46350,AT5G59650,AT5  
G59680,AT5G59660,AT5G59670,AT3G46330,AT5G16900,AT1G07560,AT1G51850,AT1G51820,AT1G51805,AT3G21  
340,AT2G04300,AT1G51810,AT1G49100,AT2G28990,AT2G28970,AT2G28960,AT2G29000,AT4G20450,AT1G51870,  
AT1G51860,AT1G51880,AT1G51890,AT1G51910,AT1G51800,AT2G19230,AT2G19210,AT2G19190,AT4G29990,AT1  
G05700,AT4G29450,AT4G29180,AT1G51790 Poptr1|582450  
AT2G16250 Poptr1|556469,Poptr1|54454  
AT4G29240,AT2G19780 Poptr1|561102  
Poptr1|345344,Poptr1|566410  
Poptr1|577372,Poptr1|549858  
AT1G53730,AT3G14350 Poptr1|589828  
AT3G50230,AT5G67200 Poptr1|76082,Poptr1|558890  
AT5G41680 Poptr1|587595  
Poptr1|570180,Poptr1|575262,Poptr1|663637  
Poptr1|575040  
AT5G06870,AT5G06860 Poptr1|667401,Poptr1|583622,Poptr1|576290,Poptr1|583623  
AT4G22730 Poptr1|350105,Poptr1|60467  
Poptr1|555588,Poptr1|99885  
AT1G71830  
AT2G01820  
Poptr1|577953  
AT5G49290,AT1G74180,AT2G25470,AT1G54480,AT1G74170,AT1G74190,AT1G74200,AT1G58190,AT3G53240,AT1  
G07390  
Poptr1|678937,Poptr1|97607,Poptr1|581679,Poptr1|675221,Poptr1|581693,Poptr1|581697,Poptr1|581692,  
Poptr1|107758,Poptr1|1104516,Poptr1|588241,Poptr1|581637,Poptr1|596674,Poptr1|98736,Poptr1|583646,Poptr1|579  
779,Poptr1|578835,Poptr1|107505,Poptr1|594167,Poptr1|578847,Poptr1|579050,Poptr1|589134,Poptr1|553527,Poptr  
1|579055,Poptr1|669725,Poptr1|589133,Poptr1|669997,Poptr1|102524,Poptr1|594706,Poptr1|101374,Poptr1|676250,  
Poptr1|101721,Poptr1|553508,Poptr1|681401,Poptr1|349333,Poptr1|591627,Poptr1|349320,Poptr1|677015,Poptr1|67  
5740,Poptr1|592666,Poptr1|645750,Poptr1|675206,Poptr1|645752,Poptr1|349311,Poptr1|588247,Poptr1|100976,Poptr  
1|581965,Poptr1|588828,Poptr1|97839  
Poptr1|712367  
AT5G07620 Poptr1|581964  
AT1G29730,AT1G29740  
AT4G31250  
AT2G23300,AT4G37250 Poptr1|72048,Poptr1|53289  
Poptr1|351212,Poptr1|351213,Poptr1|576724  
Poptr1|555666  
AT2G13800,AT2G13790  
AT1G65380 Poptr1|596988  
AT5G06820 Poptr1|352270  
AT3G43740,AT5G21090 Poptr1|549013,Poptr1|682526  
AT4G28650 Poptr1|553299  
AT1G69910  
Poptr1|101911  
AT3G08680  
AT5G06940 Poptr1|98699,Poptr1|576316  
Poptr1|571929,Poptr1|553444  
Poptr1|355750  
Poptr1|730629  
AT5G67280  
AT3G49750,AT5G65830 Poptr1|53456,Poptr1|572001  
Poptr1|563687

Poptr1|702019,Poptr1|561906  
Poptr1|64521  
AT3G24240 Poptr1|63094,Poptr1|343807  
AT5G62710 Poptr1|699455  
AT3G02880,AT5G16590  
Poptr1|591187  
Poptr1|553342  
Poptr1|586894  
AT5G58300 Poptr1|571925,Poptr1|738987,Poptr1|577206  
AT5G49660 Poptr1|711248  
Poptr1|107566  
Poptr1|64520  
AT5G14210 Poptr1|706949  
Poptr1|656287,Poptr1|55462,Poptr1|104398  
Poptr1|583426  
AT1G51830  
AT4G20270 Poptr1|63264,Poptr1|693310  
Poptr1|593275  
AT3G57830,AT2G42290 Poptr1|98705  
AT5G48940  
AT1G68400  
Poptr1|687563  
AT1G64210  
AT5G65240,AT5G10290 Poptr1|718757,Poptr1|51713  
AT5G58150  
AT2G45340 Poptr1|730860  
Poptr1|62896  
Poptr1|590668  
Poptr1|76233,Poptr1|593991,Poptr1|106704  
Poptr1|585086  
AT2G01210 Poptr1|566571,Poptr1|720688  
Poptr1|354663,Poptr1|574483  
Poptr1|582665,Poptr1|108053  
AT1G78980 Poptr1|744758  
Poptr1|597758  
AT4G16162 Poptr1|582601  
AT4G03390 Poptr1|571773  
Poptr1|596829,Poptr1|596001  
Poptr1|577081,Poptr1|646384  
AT2G24230 Poptr1|58746,Poptr1|653571  
Poptr1|568691  
Poptr1|695098  
AT1G34290  
AT2G35620,AT1G31420  
Poptr1|581080  
Poptr1|584893  
Poptr1|589380  
AT1G72300,AT1G17240,AT1G17250 Poptr1|676352,Poptr1|553840  
AT5G45840  
Poptr1|560897  
Poptr1|594406  
AT1G72460  
Poptr1|596822  
Poptr1|579376,Poptr1|99550  
AT5G16000 Poptr1|580735,Poptr1|693809  
AT3G53590  
Poptr1|106885  
AT5G20690,AT3G42880 Poptr1|589309  
Poptr1|584711,Poptr1|592956  
Poptr1|348879,Poptr1|546479  
Poptr1|593180  
AT2G34930 Poptr1|566442  
AT1G75640 Poptr1|346735,Poptr1|652015  
AT5G39390  
AT5G45780 Poptr1|545163  
AT1G29750 Poptr1|699008,Poptr1|545124  
AT4G22130  
Poptr1|587793  
AT1G34420 Poptr1|592224,Poptr1|574291,Poptr1|574290  
Poptr1|585077,Poptr1|548097,Poptr1|105880  
AT4G28490  
Poptr1|570161  
AT5G01890  
AT1G66830  
AT1G17230 Poptr1|65685,Poptr1|569141  
AT5G65710  
Poptr1|672063,Poptr1|108187,Poptr1|695134  
Poptr1|582893  
Poptr1|586167  
AT3G56050  
AT2G31880 Poptr1|597027  
AT1G55610,AT3G13380 Poptr1|66010,Poptr1|672125

AT3G12610 Poptr1|703772  
AT5G66330 Poptr1|691475,Poptr1|557749  
AT2G26330 Poptr1|356922,Poptr1|76383  
AT2G02780,AT1G14390 Poptr1|739883  
AT1G67720 Poptr1|565946,Poptr1|354714  
AT1G60800 Poptr1|354798,Poptr1|55055  
AT1G72180 Poptr1|574226  
AT1G06840 Poptr1|574459  
AT5G07180,AT5G62230 Poptr1|575709,Poptr1|356343  
AT4G26540,AT5G56040 Poptr1|65955,Poptr1|582571  
AT1G51840 Poptr1|705465,Poptr1|581699  
AT1G51840 Poptr1|101376,Poptr1|101375,Poptr1|587892,Poptr1|594160,Poptr1|578846,Poptr1|702350,Poptr1|34656  
5,Poptr1|593075,Poptr1|705424,Poptr1|588091,Poptr1|553526,Poptr1|589131,Poptr1|569686,Poptr1|596673,Poptr1|1  
03963,Poptr1|677016,Poptr1|101552,Poptr1|591524,Poptr1|586853  
AT1G56130,AT1G56140,AT1G56120,AT1G56145 Poptr1|691036,Poptr1|350425  
Poptr1|548761,Poptr1|582834,Poptr1|101717,Poptr1|350441  
Poptr1|596292,Poptr1|568653  
Poptr1|588661,Poptr1|346564  
Poptr1|583000  
Poptr1|576102  
AT3G19700 Poptr1|64099  
AT2G26730 Poptr1|578398  
Poptr1|568763  
Poptr1|58495  
Poptr1|104413  
AT5G49780,AT5G49760,AT5G49770,AT5G49750  
Poptr1|65153  
AT4G08850,AT1G35710  
Poptr1|574506,Poptr1|574486,Poptr1|106113,Poptr1|570988,Poptr1|575638,Poptr1|575635,Poptr1|10073  
6,Poptr1|561968,Poptr1|356401,Poptr1|580405,Poptr1|350038  
AT5G61480 Poptr1|590165,Poptr1|554167  
Poptr1|585708  
Poptr1|726057,Poptr1|103349  
Poptr1|590457  
Poptr1|563523  
Poptr1|552941,Poptr1|546512  
Poptr1|585509  
AT5G46080  
AT5G35390,AT2G07040 Poptr1|99246,Poptr1|99267,Poptr1|344215  
Poptr1|594705  
Poptr1|575131,Poptr1|570066  
Poptr1|72989  
AT5G61570 Poptr1|585064  
AT1G60630 Poptr1|354391  
Poptr1|594715  
Poptr1|585782,Poptr1|588592  
Poptr1|583235  
AT5G05160  
AT1G11130  
AT1G08590 Poptr1|573741,Poptr1|571122  
Poptr1|576099  
Poptr1|674237  
AT2G42800 Poptr1|596082  
AT5G59616 Poptr1|677311,Poptr1|591041  
Poptr1|581652  
AT5G45770  
AT1G63430 Poptr1|578836  
AT4G39270  
AT5G46330 Poptr1|545098  
AT5G48740 Poptr1|569158  
Poptr1|577282,Poptr1|585065  
Poptr1|588978  
Poptr1|102504  
AT1G27190,AT1G69990 Poptr1|703288,Poptr1|556027  
Poptr1|586592,Poptr1|595818,Poptr1|586593,Poptr1|106403,Poptr1|105876,Poptr1|584072,Poptr1|58059  
8,Poptr1|96935,Poptr1|595820,Poptr1|569449,Poptr1|587203,Poptr1|555046  
Poptr1|107056  
Poptr1|349421,Poptr1|584129  
AT2G01950 Poptr1|657034  
AT3G23750 Poptr1|736662,Poptr1|351657,Poptr1|595462,Poptr1|570981  
AT5G51560 Poptr1|701139,Poptr1|570578  
Poptr1|349396,Poptr1|703816,Poptr1|596826  
Poptr1|75269  
AT1G25320  
AT5G43020  
AT3G12145 Poptr1|585074  
Poptr1|106112  
AT5G44700,AT4G20140 Poptr1|693316,Poptr1|48628

Poptr1|593201  
Poptr1|641782  
AT4G28560  
Poptr1|574398,Poptr1|592894  
AT2G33170 Poptr1|554813,Poptr1|690927  
Poptr1|589786  
AT1G75820 Poptr1|583546,Poptr1|73064,Poptr1|642936  
AT4G39400 Poptr1|562744  
Poptr1|101875,Poptr1|346567,Poptr1|346563,Poptr1|102175,Poptr1|583809,Poptr1|591496,Poptr1|58153  
2,Poptr1|591497  
Poptr1|564304  
Poptr1|565882  
Poptr1|580365  
Poptr1|594314,Poptr1|588338  
AT3G47580,AT3G47090,AT3G47570,AT3G47110,AT5G20480  
Poptr1|584896,Poptr1|584895,Poptr1|584892,Poptr1|584898,Poptr1|583128,Poptr1|99857,Poptr1|585874,  
Poptr1|592893,Poptr1|545069,Poptr1|563691,Poptr1|563692,Poptr1|563689,Poptr1|558577,Poptr1|580810,Poptr1|56  
7669,Poptr1|567670,Poptr1|587646,Poptr1|580390,Poptr1|582694,Poptr1|576953,Poptr1|560898,Poptr1|575018,Poptr  
1|569348  
AT3G24660 Poptr1|553251  
AT5G07150 Poptr1|556468  
Poptr1|593365,Poptr1|593364,Poptr1|106021,Poptr1|102507,Poptr1|681701,Poptr1|574557,Poptr1|66565  
2,Poptr1|597362,Poptr1|102506  
AT5G12940  
Poptr1|590504,Poptr1|587645  
Poptr1|569626  
Poptr1|586595,Poptr1|579136  
AT4G03010,AT1G03440 Poptr1|572778  
Poptr1|101781  
AT4G36180 Poptr1|563258  
Poptr1|697444,Poptr1|683886,Poptr1|555184  
Poptr1|585942,Poptr1|588986,Poptr1|585926,Poptr1|595620,Poptr1|585947,Poptr1|595210,Poptr1|58002  
3,Poptr1|585948,Poptr1|674216,Poptr1|580021  
AT3G28450 Poptr1|549493,Poptr1|577539  
AT4G23740 Poptr1|640395,Poptr1|646712,Poptr1|569464,Poptr1|100153  
Poptr1|706612  
Poptr1|576510,Poptr1|561141,Poptr1|48940  
Poptr1|108039  
AT5G45800 Poptr1|545169,Poptr1|568699  
Poptr1|580953  
AT5G63710 Poptr1|65184,Poptr1|579984  
AT3G51740 Poptr1|560952,Poptr1|577061  
AT5G37450  
Poptr1|554725  
Poptr1|722248  
AT2G37050 Poptr1|576643,Poptr1|702705  
Poptr1|49433  
AT1G69270 Poptr1|581695  
AT5G07280 Poptr1|104703,Poptr1|356263  
AT1G47885  
AT2G15320 Poptr1|557428,Poptr1|549938  
Poptr1|588660,Poptr1|553314,Poptr1|351352,Poptr1|595208,Poptr1|656288,Poptr1|96846  
Poptr1|585508  
Poptr1|586944,Poptr1|660407  
Poptr1|562691,Poptr1|558609  
Poptr1|679185,Poptr1|563240,Poptr1|566083  
Poptr1|107172  
Poptr1|545354  
AT4G20940 Poptr1|582582,Poptr1|684096  
AT5G48380  
AT3G14840,AT1G53420  
AT5G24100,AT5G53320  
Poptr1|351355,Poptr1|587122  
Poptr1|588620  
Poptr1|588831  
AT3G15410 Poptr1|568927  
Poptr1|576103  
Poptr1|563686  
AT2G20850  
Poptr1|100723,Poptr1|570858  
AT1G24650  
AT1G73070,AT1G73080,AT1G17750 Poptr1|563462,Poptr1|563474  
Poptr1|344342,Poptr1|577182  
Poptr1|577196  
Poptr1|649663,Poptr1|681866  
Poptr1|575930,Poptr1|108760,Poptr1|108996  
AT3G25670,AT1G13230  
AT1G07650  
Poptr1|595804,Poptr1|75825  
Poptr1|594086  
AT2G36570 Poptr1|589556  
Poptr1|590312,Poptr1|595616,Poptr1|107484,Poptr1|597185

Poptr1|585066,Poptr1|99559,Poptr1|101910,Poptr1|99554,Poptr1|109307,Poptr1|585067,Poptr1|109036  
AT2G24130 Poptr1|561359,Poptr1|578711  
Poptr1|108567,Poptr1|704896  
AT5G01950 Poptr1|589615  
AT1G34210 Poptr1|574322  
AT5G10020 Poptr1|51745,Poptr1|562687  
AT3G56370 Poptr1|571667,Poptr1|702513  
Poptr1|559728  
AT5G58540 Poptr1|106715  
Poptr1|593337  
Poptr1|595324,Poptr1|595323  
Poptr1|590618  
Poptr1|555646,Poptr1|595565  
Poptr1|585844  
AT1G34110Poptr1|551280,Poptr1|72643  
AT5G13290 Poptr1|581694  
Poptr1|568874  
AT5G63410 Poptr1|356030  
AT1G28440 Poptr1|545254,Poptr1|743857  
Poptr1|709382,Poptr1|581975,Poptr1|554339  
AT1G80080 Poptr1|597613  
Poptr1|588752,Poptr1|587693,Poptr1|593125,Poptr1|587677,Poptr1|570438,Poptr1|588711,Poptr1|59112  
0,Poptr1|587669,Poptr1|587685,Poptr1|595921,Poptr1|588747  
AT5G61240 Poptr1|724066,Poptr1|656498  
AT1G13910  
Poptr1|570437  
AT3G02130 Poptr1|556309,Poptr1|668667  
Poptr1|109177,Poptr1|582909  
AT4G18760 Poptr1|545161,Poptr1|580557  
AT5G51350 Poptr1|561285  
AT4G30520,AT2G23950 Poptr1|578689,Poptr1|352389  
Poptr1|718257,Poptr1|594625  
AT3G56100  
Poptr1|107890  
Poptr1|589250  
Poptr1|587190,Poptr1|554901  
Poptr1|597528,Poptr1|675207  
AT3G17640 Poptr1|584755,Poptr1|568184  
Poptr1|595328  
Poptr1|573582  
AT4G18640 Poptr1|97503  
AT1G68780 Poptr1|564473  
AT2G02220 Poptr1|564759,Poptr1|566348  
AT3G20190,AT1G50610 Poptr1|585616,Poptr1|97982,Poptr1|563384  
AT3G11010,AT5G27060,AT3G28890,AT3G11080,AT3G05650,AT3G05660,AT2G15080,AT1G47890,AT1G45616,AT4  
G13880,AT4G13920,AT4G13810,AT4G13820,AT1G71400,AT1G71390,AT3G05360,AT3G05370,AT3G23120,AT3G23  
110,AT3G23010,AT3G24982,AT3G25020,AT3G25010,AT3G24900,AT2G33020,AT2G32680,AT2G25440,AT2G33060,  
AT2G33050,AT2G33080,AT2G32660,AT5G40170  
Poptr1|355410,Poptr1|569661,Poptr1|569657,Poptr1|355401,Poptr1|594243,Poptr1|569665,Poptr1|59144  
7,Poptr1|355398,Poptr1|596299,Poptr1|569644,Poptr1|107719,Poptr1|103804,Poptr1|355381,Poptr1|582916,Poptr1|5  
91443,Poptr1|590620,Poptr1|594358,Poptr1|569646,Poptr1|596561,Poptr1|355344,Poptr1|569607,Poptr1|597728,Pop  
tr1|589791,Poptr1|584871,Poptr1|582910,Poptr1|589794,Poptr1|584872,Poptr1|351474,Poptr1|588406,Poptr1|5770  
76,Poptr1|577079,Poptr1|577070,Poptr1|579470,Poptr1|99823,Poptr1|550404,Poptr1|550406,Poptr1|581530,Poptr1|5  
69159,Poptr1|65707,Poptr1|579119,Poptr1|590142,Poptr1|569688,Poptr1|355434,Poptr1|585813,Poptr1|589787  
Poptr1|103198  
Poptr1|596361  
AT1G66150 Poptr1|348736,Poptr1|556000  
AT2G41820 Poptr1|57987,Poptr1|560512  
AT4G04220 Poptr1|62680  
Poptr1|554726,Poptr1|640080  
AT1G12460,AT1G62950 Poptr1|548558,Poptr1|554268  
AT1G67510 Poptr1|565886,Poptr1|565051  
Poptr1|592090  
Poptr1|551345,Poptr1|559344  
AT3G13065  
Poptr1|579103,Poptr1|594711,Poptr1|646974  
AT2G26380,AT1G33590,AT1G33610,AT1G33600,AT1G33670 Poptr1|592381,Poptr1|592380,Poptr1|596650  
Poptr1|586145  
Poptr1|640081  
Poptr1|592640  
Poptr1|102606  
Poptr1|675671,Poptr1|589020,Poptr1|579086,Poptr1|355412  
Poptr1|103619  
Poptr1|545253  
Poptr1|581973  
Poptr1|355411  
AT5G25910,AT5G25930 Poptr1|352747,Poptr1|705336,Poptr1|103718  
Poptr1|104813,Poptr1|567799  
AT1G09970 Poptr1|551668  
AT1G74360 Poptr1|569957,Poptr1|581385  
Poptr1|580661  
AT3G25560 Poptr1|698274,Poptr1|564436



AT3G28040 Poptr1|343048,Poptr1|572898  
Poptr1|680128  
Poptr1|595614,Poptr1|597499  
Poptr1|586355,Poptr1|98481  
Poptr1|572870  
AT5G41180Poptr1|581696  
AT3G49670,AT5G65700 Poptr1|717994  
Poptr1|102728  
AT4G33430 Poptr1|48862  
AT1G78530 Poptr1|673537  
Poptr1|567153,Poptr1|567154,Poptr1|564128,Poptr1|553136  
Poptr1|585006,Poptr1|584360  
Poptr1|585534  
AT3G59510 Poptr1|105625,Poptr1|594530,Poptr1|597527,Poptr1|109302,Poptr1|677381,Poptr1|75387  
Poptr1|666513,Poptr1|699408  
AT1G79620 Poptr1|577256,Poptr1|589583,Poptr1|354211  
Poptr1|701405  
Poptr1|596360  
AT3G20820 Poptr1|554949,Poptr1|62984  
Poptr1|579146,Poptr1|553322,Poptr1|553312,Poptr1|349114,Poptr1|573398  
AT5G63930 Poptr1|58872,Poptr1|571139  
AT2G25790 Poptr1|578044,Poptr1|717958  
AT5G39720,AT5G39730,AT3G28940,AT3G28930,AT3G28950,AT4G31310,AT2G24390  
Poptr1|690526,Poptr1|60822  
Poptr1|555983,Poptr1|556328,Poptr1|343051  
Poptr1|106599  
AT2G03820  
AT2G14760,AT4G33880 Poptr1|65285  
Poptr1|561311,Poptr1|669610  
AT5G37800,AT1G66470 Poptr1|348808,Poptr1|555949  
AT5G43175,AT1G27740  
Poptr1|589350  
Poptr1|559633,Poptr1|551101  
AT4G02590,AT1G03040 Poptr1|559634  
AT5G67110  
Poptr1|687968,Poptr1|595424  
AT5G58010  
AT4G30980,AT2G24260  
AT1G75200 Poptr1|553347  
AT3G15150 Poptr1|727174  
Poptr1|550017,Poptr1|557525  
Poptr1|642106  
AT2G14680 Poptr1|557526,Poptr1|642105  
AT3G54480 Poptr1|555019,Poptr1|590281,Poptr1|639844  
AT4G05070 Poptr1|568311,Poptr1|555484,Poptr1|571808,Poptr1|574585,Poptr1|582082  
AT4G35520 Poptr1|71898  
Poptr1|659819  
AT2G35810,AT2G35830,AT2G35820  
AT1G06560 Poptr1|72710  
Poptr1|575873  
Poptr1|352312  
AT1G80810,AT1G15940 Poptr1|63033,Poptr1|554873  
AT4G31880 Poptr1|561982,Poptr1|578270  
AT5G47690 Poptr1|575874,Poptr1|351135  
AT5G10950  
Poptr1|551460  
AT1G77600 Poptr1|551461  
AT5G09670,AT5G64550 Poptr1|640805,Poptr1|693784  
AT1G64140 Poptr1|709230,Poptr1|350294  
Poptr1|578146,Poptr1|654077  
AT3G16250 Poptr1|691283  
AT4G32590  
AT5G41150Poptr1|589928  
AT3G58600 Poptr1|592187,Poptr1|574342  
AT2G31150,AT1G06190 Poptr1|72893,Poptr1|551032  
AT4G30920,AT4G30910,AT2G24200 Poptr1|344492,Poptr1|578744  
Poptr1|109153  
Poptr1|667459,Poptr1|695534  
AT4G00860,AT1G01170  
AT5G02710 Poptr1|561527  
AT1G09150 Poptr1|744562,Poptr1|570763  
AT1G08380 Poptr1|648969,Poptr1|741765  
AT4G38410  
AT1G20450,AT1G20440,AT1G76180 Poptr1|694892  
AT1G68585 Poptr1|656798,Poptr1|698249  
AT3G19810 Poptr1|659320  
Poptr1|671967,Poptr1|738870  
AT1G22700  
Poptr1|659722,Poptr1|671191,Poptr1|684908,Poptr1|656057  
AT2G39590  
AT5G59850,AT1G07770,AT3G46040  
AT2G19720,AT4G29430 Poptr1|595112,Poptr1|649858,Poptr1|594217

AT1G43130 Poptr1|643454  
AT2G20130,AT2G20120 Poptr1|669317,Poptr1|584036  
Poptr1|685246  
Poptr1|563143,Poptr1|678988,Poptr1|689723  
AT2G18460 Poptr1|674284  
AT3G62850  
AT3G13280 Poptr1|662536,Poptr1|570661  
AT4G30760,AT3G62050,AT2G19890,AT3G62460  
AT5G61180  
AT3G61100,AT3G61090  
AT5G64450  
AT3G62210,AT3G62200 Poptr1|744392,Poptr1|699666,Poptr1|662537,Poptr1|570663  
AT3G60940,AT5G61190  
AT3G56730,AT5G64590  
AT1G07280,AT2G29670 Poptr1|723097,Poptr1|64282  
AT3G47080  
Poptr1|353652  
AT2G23640 Poptr1|696045  
Poptr1|692379,Poptr1|572319  
AT3G10915 Poptr1|665630  
AT3G18260 Poptr1|699508,Poptr1|733010  
Poptr1|592589,Poptr1|704087,Poptr1|661418  
AT2G15280  
AT3G54120 Poptr1|701581  
AT1G68230 Poptr1|354200  
AT3G61560,AT2G46170  
AT5G41600,AT1G64090,AT4G11220,AT4G23630 Poptr1|681779,Poptr1|646681  
AT4G01230  
AT2G01240  
AT3G19460 Poptr1|649620  
AT3G10260 Poptr1|714925,Poptr1|684572  
AT5G60620 Poptr1|697143,Poptr1|713446  
AT4G11060Poptr1|570744  
AT4G15730 Poptr1|581850  
AT1G02990  
AT3G62900 Poptr1|573451,Poptr1|700462  
AT1G09870 Poptr1|724400,Poptr1|686434  
AT3G09925  
AT5G05500 Poptr1|659473,Poptr1|656285  
AT2G01918 Poptr1|552953  
AT4G21280,AT4G05180 Poptr1|555462,Poptr1|568388  
AT3G29270 Poptr1|728558  
AT1G74370  
AT1G69330 Poptr1|55379  
Poptr1|544742,Poptr1|701856  
AT5G54780,AT4G27100 Poptr1|571500,Poptr1|569095  
AT4G28550,AT2G20440 Poptr1|559726  
AT3G59630 Poptr1|589479  
Poptr1|573251  
AT4G36660 Poptr1|703422,Poptr1|719471  
AT5G65650  
AT1G19380  
AT5G16880 Poptr1|573860,Poptr1|596931  
AT1G06210 Poptr1|715183,Poptr1|710684  
AT5G10890  
AT3G09730  
AT4G31805 Poptr1|578278,Poptr1|561987  
AT1G17760 Poptr1|693536  
AT3G18770 Poptr1|99896,Poptr1|549866  
AT3G49590 Poptr1|700739,Poptr1|569702  
Poptr1|568941  
AT2G20875 Poptr1|571759,Poptr1|580375  
Poptr1|592200  
AT1G34245  
AT2G07751  
Poptr1|581390  
Poptr1|102397  
Poptr1|65192  
AT5G39900 Poptr1|736254  
AT5G08650 Poptr1|641995  
Poptr1|551549,Poptr1|559135  
Poptr1|71665  
AT1G78050,AT1G22170  
AT5G19900 Poptr1|547667,Poptr1|555262  
AT2G31740 Poptr1|65069  
AT1G51130,AT3G20760 Poptr1|106714,Poptr1|576268  
Poptr1|351071  
AT2G30600 Poptr1|52265,Poptr1|684678  
Poptr1|570237,Poptr1|733573  
AT2G39270 Poptr1|563806  
AT3G01820 Poptr1|681848

AT2G37250  
 AT3G13120 Poptr1|728016,Poptr1|550190  
 AT1G16070 Poptr1|554914,Poptr1|62792  
 AT1G03030 Poptr1|643208,Poptr1|715098  
 AT3G01800  
 Poptr1|691627  
 AT1G50120 Poptr1|562828  
 Poptr1|579450  
 AT1G71820 Poptr1|592192  
 AT1G05480,AT3G24340  
 AT2G21450  
 AT2G16390 Poptr1|592433,Poptr1|556506  
 Poptr1|591759  
 Poptr1|546108  
 AT2G44390,AT2G44380,AT5G43520,AT2G28270,AT2G17740,AT2G44370,AT5G40590 Poptr1|583290  
 AT2G44400 Poptr1|583286  
 Poptr1|556612  
 AT3G59130 Poptr1|585565  
 AT2G21850,AT2G21830,AT2G21840  
 AT1G29179 Poptr1|96979  
 AT2G21810  
 AT2G37810,AT2G37800,AT2G37820 Poptr1|567363  
 Poptr1|570464  
 Poptr1|350235  
 Poptr1|579547,Poptr1|587886,Poptr1|576245  
 Poptr1|103371  
 AT5G16430 Poptr1|573728  
 AT2G42060  
 Poptr1|575783  
 Poptr1|350894  
 AT4G09690 Poptr1|593620  
 AT5G01480  
 AT3G06990,AT3G07000,AT1G58037,AT5G45730,AT5G29624,AT5G54050,AT5G54030,AT5G54040,AT5G54020,AT4  
 G14980,AT5G44770,AT2G04500,AT5G40320,AT4G11540,AT4G11550,AT4G11390,AT4G01930,AT4G01910,AT4G01  
 920,AT4G02180,AT4G01925,AT4G01740,AT4G01760,AT4G02190,AT1G69150,AT3G43890,AT1G65180,AT4G01350,  
 AT5G59920,AT5G59940,AT5G59930,AT5G22355,AT3G45840,AT3G48400,AT5G37620,AT2G04680,AT2G19660,AT2  
 G19650,AT3G46810,AT3G46800,AT5G42840,AT3G27473,AT3G28650,AT3G45530,AT3G27510,AT3G27500,AT3G27  
 480,AT3G27490,AT2G43220,AT4G16015,AT5G43040,AT5G43030,AT5G26190,AT1G55380,AT1G55420,AT1G55430,  
 AT1G55390,AT5G42280,AT1G55440,AT2G23100,AT1G55700,AT3G11390,AT3G11385,AT3G11370,AT3G11402,AT2  
 G17590,AT2G17600,AT1G35610,AT3G13760,AT5G17960,AT3G59120,AT2G02640,AT2G02610,AT2G02630,AT2G02  
 690,AT2G02620,AT2G02700,AT2G02680,AT2G40050,AT1G61840,AT3G26550,AT4G10370,AT5G46670,AT5G46660,  
 AT5G55780,AT1G44050,AT5G55800,AT5G55770,AT5G02350,AT2G13900,AT5G02330,AT2G13950,AT5G02340,AT5  
 G02360,AT1G53340,AT1G61710,AT1G34480,AT3G21210,AT3G13590,AT2G28460,AT4G10560,AT1G44020,AT1G44  
 030,AT1G29180,AT4G26380,AT5G03360,AT5G37210,AT4G02540,AT1G62030,AT3G26250,AT3G26240,AT4G15070,  
 AT5G48320,AT4G13130,AT1G66450,AT1G66440,AT3G50010  
 Poptr1|576374  
 Poptr1|586179,Poptr1|576271,Poptr1|576246,Poptr1|594768,Poptr1|576247,Poptr1|576270,Poptr1|57637  
 3  
 Poptr1|587885  
 AT2G27660 Poptr1|569411  
 AT3G25850,AT1G45243  
 AT3G49830,AT5G67630 Poptr1|689407,Poptr1|576773  
 AT5G22330 Poptr1|556835,Poptr1|689788  
 Poptr1|691996  
 AT3G07880 Poptr1|343000,Poptr1|57331,Poptr1|560152,Poptr1|667139  
 AT1G12070,AT1G62450  
 Poptr1|711216  
 AT5G55060 Poptr1|568544  
 AT3G01440 Poptr1|569063,Poptr1|699989  
 AT1G63820,AT5G41380 Poptr1|548435,Poptr1|350258  
 AT1G06960,AT2G30260  
 AT3G16630 Poptr1|565594,Poptr1|587322  
 Poptr1|702637  
 Poptr1|348259  
 AT4G15885 Poptr1|593622  
 AT2G47580 Poptr1|57202,Poptr1|644766  
 AT3G53640,AT1G13350,AT3G25840 Poptr1|564516,Poptr1|566642  
 AT2G25950 Poptr1|736859  
 AT3G12350 Poptr1|347578  
 AT5G09300 Poptr1|694283  
 AT1G21400,AT5G34780  
 Poptr1|559310,Poptr1|681981  
 AT2G33260 Poptr1|573890  
 AT5G22820 Poptr1|721442  
 AT3G07550 Poptr1|577435,Poptr1|573168  
 AT1G62935 Poptr1|557045,Poptr1|350120  
 AT3G22845 Poptr1|687089  
 AT3G07680 Poptr1|684042  
 AT1G66245  
 AT5G41020 Poptr1|554751,Poptr1|575346  
 AT1G11380Poptr1|713605,Poptr1|727749  
 Poptr1|666263

AT1G04420 Poptr1|696366  
AT5G21940 Poptr1|578015,Poptr1|561575  
AT3G43850  
AT3G57150 Poptr1|344116  
AT1G02870 Poptr1|572702  
Poptr1|581885  
AT3G05540 Poptr1|725700,Poptr1|587327  
AT3G16640  
AT1G19370,AT1G75140 Poptr1|573243  
AT1G47970,AT3G17160 Poptr1|566863  
AT5G10695 Poptr1|563464  
AT4G29905,AT5G57123 Poptr1|560648,Poptr1|58813  
AT5G40190,AT3G28140 Poptr1|701793,Poptr1|706695  
AT1G48130 Poptr1|566901,Poptr1|682401  
AT2G20210 Poptr1|700718  
AT1G43310,AT5G33320  
AT5G17630 Poptr1|663218  
AT3G01550 Poptr1|64782  
AT1G61800 Poptr1|544849  
AT4G03950  
AT5G46110Poptr1|647933,Poptr1|743855  
Poptr1|662012,Poptr1|700933  
Poptr1|564292  
AT5G54800 Poptr1|569101,Poptr1|730359  
AT3G48380 Poptr1|666573,Poptr1|733487  
AT5G05130 Poptr1|351385,Poptr1|576145,Poptr1|576140,Poptr1|582002,Poptr1|576135  
Poptr1|597125  
AT2G28110Poptr1|54841  
AT5G61840 Poptr1|666775,Poptr1|575558,Poptr1|570368,Poptr1|687841  
AT1G27440 Poptr1|666776,Poptr1|591645,Poptr1|586661,Poptr1|708857,Poptr1|554680  
AT5G22940  
AT3G50640,AT5G66800 Poptr1|557377,Poptr1|581507,Poptr1|655159  
AT3G19200  
AT5G52800 Poptr1|592923  
AT1G07700 Poptr1|677848  
AT2G46280,AT2G46290 Poptr1|686276,Poptr1|698138  
Poptr1|644529  
AT1G14620  
Poptr1|557077  
AT2G17787,AT4G35940 Poptr1|550855,Poptr1|559858,Poptr1|559857  
AT1G27400,AT1G67430 Poptr1|720322,Poptr1|565870,Poptr1|570245,Poptr1|575339  
Poptr1|562765,Poptr1|705579,Poptr1|71771,Poptr1|75899  
AT4G40100,AT2G22475  
Poptr1|641624,Poptr1|592120,Poptr1|591269,Poptr1|647774,Poptr1|647773,Poptr1|704985  
Poptr1|555574  
AT1G28200 Poptr1|551629,Poptr1|559032  
Poptr1|554719  
AT4G01600  
AT5G13200 Poptr1|350567,Poptr1|554717,Poptr1|711958,Poptr1|711959  
Poptr1|710358  
Poptr1|65017  
AT5G23360,AT5G23350,AT5G23370,AT5G08350  
Poptr1|71767,Poptr1|595808,Poptr1|591614,Poptr1|595809,Poptr1|71766  
AT2G29180 Poptr1|641159  
AT5G65980 Poptr1|71870  
AT2G17500  
Poptr1|727226,Poptr1|65840  
Poptr1|593148,Poptr1|350037,Poptr1|590172,Poptr1|569205,Poptr1|579172,Poptr1|587510  
AT1G76520,AT1G76530,AT1G20925 Poptr1|346525  
AT5G39530,AT5G39520 Poptr1|688953  
AT5G64400  
AT5G09570 Poptr1|697428,Poptr1|706648  
AT5G03730 Poptr1|576754,Poptr1|589567  
Poptr1|63587,Poptr1|586714  
AT4G24480  
Poptr1|696984,Poptr1|567981  
AT4G17790 Poptr1|554031,Poptr1|590030  
AT1G71940  
AT4G09580 Poptr1|689295  
Poptr1|567277  
AT2G40090 Poptr1|564017  
AT5G19930 Poptr1|702113  
AT4G11420Poptr1|570745,Poptr1|744581  
AT3G63140 Poptr1|643312,Poptr1|714967  
AT1G60430 Poptr1|672979,Poptr1|578872  
Poptr1|594455,Poptr1|75470,Poptr1|562305  
AT2G32340,AT1G05270  
AT5G57880 Poptr1|578721,Poptr1|352359

Poptr1|594113  
AT3G47610 Poptr1|580072,Poptr1|581112,Poptr1|569973,Poptr1|554744  
Poptr1|570616  
AT1G31170Poptr1|575641  
AT3G17860,AT1G48500 Poptr1|666332,Poptr1|661656,Poptr1|656962,Poptr1|698168  
AT1G70700  
Poptr1|648195,Poptr1|683247,Poptr1|550346  
AT1G79450,AT1G16360,AT1G54320,AT3G12740 Poptr1|687280,Poptr1|686415  
AT5G46150 Poptr1|727817  
Poptr1|581556,Poptr1|589363  
AT5G65490 Poptr1|581557  
AT2G35215,AT5G46770 Poptr1|590011,Poptr1|580074  
AT5G23130,AT5G08200 Poptr1|562820,Poptr1|71808,Poptr1|728697  
AT1G54350 Poptr1|55428  
Poptr1|590626,Poptr1|678750  
AT5G40760,AT3G27300 Poptr1|641721,Poptr1|736144  
AT1G24280,AT5G13110 Poptr1|554745,Poptr1|708767  
Poptr1|97585  
AT5G35790  
AT1G09420 Poptr1|699679  
AT5G35080 Poptr1|583649  
AT3G47650  
Poptr1|654134,Poptr1|702010  
Poptr1|672447  
AT2G27950 Poptr1|99165  
AT5G04460 Poptr1|725133  
AT1G31240 Poptr1|587952,Poptr1|586747,Poptr1|575578  
AT1G31490  
Poptr1|689330  
AT1G65445  
AT3G62160 Poptr1|572536  
AT2G19070 Poptr1|96926,Poptr1|578769  
AT1G28680 Poptr1|555712  
AT5G57840  
AT4G31910  
Poptr1|698455  
AT2G23510,AT2G25150,AT5G07080,AT3G47170  
Poptr1|105783  
AT5G41040 Poptr1|49230,Poptr1|64989,Poptr1|589739,Poptr1|733692  
AT1G32910,AT1G78990,AT5G16410 Poptr1|655562  
AT1G65450 Poptr1|587977  
Poptr1|550428,Poptr1|550430,Poptr1|65747,Poptr1|65750,Poptr1|569287,Poptr1|581298,Poptr1|65752,P  
optr1|707917  
AT2G40230 Poptr1|564060,Poptr1|583023,Poptr1|55464  
AT5G17540,AT3G03480  
Poptr1|586044  
Poptr1|97723,Poptr1|586045,Poptr1|689156,Poptr1|578723,Poptr1|737972  
Poptr1|553189  
Poptr1|58938,Poptr1|571376,Poptr1|571373,Poptr1|571374,Poptr1|579997  
AT1G27620 Poptr1|342213,Poptr1|559763  
Poptr1|573459,Poptr1|650739,Poptr1|106817,Poptr1|571377  
Poptr1|356277,Poptr1|573097  
Poptr1|592246,Poptr1|553437,Poptr1|356774,Poptr1|356772  
AT5G63560,AT3G48720  
AT5G48930 Poptr1|587193,Poptr1|554899  
AT1G03390 Poptr1|98934  
AT5G19680 Poptr1|705124,Poptr1|578523  
AT2G34910,AT1G30850,AT5G44660,AT4G20190 Poptr1|350483,Poptr1|548167  
Poptr1|747366,Poptr1|591301  
AT4G34730 Poptr1|694199  
AT2G34357 Poptr1|577821  
AT4G23540 Poptr1|351513  
AT3G13445,AT1G55520  
Poptr1|573909,Poptr1|702425  
AT3G02190,AT4G31985,AT2G25210  
Poptr1|341812,Poptr1|653534,Poptr1|654208,Poptr1|669640,Poptr1|679437,Poptr1|737313  
AT5G23020,AT5G23010  
AT1G18500,AT1G74040 Poptr1|71714  
AT1G25988,AT1G25682 Poptr1|658951,Poptr1|564483  
AT5G16570  
AT1G48470,AT3G17820  
Poptr1|685196,Poptr1|562842  
Poptr1|681586,Poptr1|593526,Poptr1|552975,Poptr1|565674,Poptr1|645159  
AT5G35630 Poptr1|565673,Poptr1|725770,Poptr1|565302  
AT1G66200,AT5G37600 Poptr1|648144,Poptr1|710427,Poptr1|569354,Poptr1|580657  
Poptr1|552970,Poptr1|552977,Poptr1|748409  
AT5G19130 Poptr1|64801  
AT5G14300  
AT5G40770,AT3G27280 Poptr1|549643,Poptr1|736130  
AT2G20530,AT4G28510 Poptr1|594617,Poptr1|685913  
AT5G44140,AT1G03860  
AT2G22640 Poptr1|571965

Poptr1|588767  
AT4G25770 Poptr1|58713  
AT5G51180Poptr1|747091,Poptr1|708973  
AT1G29120 Poptr1|568722  
AT1G10040 Poptr1|347536  
AT3G29280 Poptr1|577714  
AT1G59550,AT4G14250,AT3G23605  
AT1G14570 Poptr1|657058,Poptr1|55174  
AT4G30870,AT5G39770 Poptr1|554996  
Poptr1|697312  
Poptr1|696051,Poptr1|719351  
AT3G50440  
AT2G23600,AT2G23590,AT2G23620,AT2G23570,AT2G23550,AT2G23580,AT2G23560,AT2G23610,AT4G37140,AT4G37150  
Poptr1|60453  
Poptr1|568425,Poptr1|71955,Poptr1|106056,Poptr1|107188,Poptr1|51832,Poptr1|558830,Poptr1|747594,  
Poptr1|563037,Poptr1|580690,Poptr1|563035,Poptr1|563039,Poptr1|76180,Poptr1|76172  
AT5G10300 Poptr1|563033,Poptr1|696048  
Poptr1|581465,Poptr1|586963  
Poptr1|589923  
AT4G17610 Poptr1|589922  
AT2G38360 Poptr1|560953,Poptr1|577062  
Poptr1|59087  
AT3G56110,AT2G40380,AT5G05380 Poptr1|724377,Poptr1|696762  
AT1G08770 Poptr1|346891,Poptr1|551089,Poptr1|651854,Poptr1|595411  
AT5G56230 Poptr1|106065,Poptr1|550673  
AT3G13710,AT3G13720,AT1G55190 Poptr1|689649  
AT5G07110  
AT1G04260 Poptr1|726429  
Poptr1|103845,Poptr1|589562  
AT5G01640  
AT1G55640  
AT4G29658  
AT1G17700  
AT4G12170  
AT1G76760 Poptr1|651576,Poptr1|342356  
AT3G06730 Poptr1|690862  
AT1G50320 Poptr1|654964  
AT3G15360 Poptr1|568915,Poptr1|670083  
AT2G15570 Poptr1|722208  
Poptr1|559326,Poptr1|684531,Poptr1|595378  
Poptr1|584604  
AT4G03520,AT1G03680  
Poptr1|574399,Poptr1|677506,Poptr1|681588,Poptr1|582703,Poptr1|680574,Poptr1|597041  
AT1G43560  
AT1G80380  
Poptr1|683725,Poptr1|711844,Poptr1|645892  
AT1G03900  
Poptr1|682003,Poptr1|715203  
AT2G32230 Poptr1|545596,Poptr1|714323,Poptr1|592890  
Poptr1|584037  
AT5G60430,AT2G16650 Poptr1|556740,Poptr1|594808,Poptr1|721527  
AT4G30940,AT2G24240 Poptr1|669595,Poptr1|561326  
AT5G18440 Poptr1|563502,Poptr1|567851  
AT4G38480  
AT4G35140 Poptr1|546274,Poptr1|697162  
AT3G45620  
AT1G53250 Poptr1|349262  
AT1G53800 Poptr1|356431,Poptr1|553835  
AT4G09140 Poptr1|574228  
AT3G15115,AT1G53180  
Poptr1|65548,Poptr1|65549,Poptr1|565372,Poptr1|591555,Poptr1|592532,Poptr1|591384,Poptr1|574297,  
Poptr1|106070,Poptr1|591366,Poptr1|576766  
AT5G18200 Poptr1|689241,Poptr1|561702  
Poptr1|349802  
AT4G37460 Poptr1|343439  
AT1G22310 Poptr1|72322,Poptr1|551584,Poptr1|549842  
AT5G23630 Poptr1|97928,Poptr1|573611  
AT5G62270  
Poptr1|594611,Poptr1|594612,Poptr1|562194  
Poptr1|568964  
AT2G20825,AT4G28190 Poptr1|48158,Poptr1|682871  
AT2G01490 Poptr1|695117  
Poptr1|567752  
AT5G08540 Poptr1|567751  
AT4G26910,AT5G55070 Poptr1|642210,Poptr1|727967,Poptr1|700565  
Poptr1|677152  
AT5G20320 Poptr1|344471  
AT3G03300  
AT1G56350  
AT3G57190 Poptr1|351462  
AT5G36170 Poptr1|659432,Poptr1|696753

AT4G33830,AT4G33840,AT4G33850,AT4G33860  
AT4G33810,AT4G33820,AT2G14690 Poptr1|107606,Poptr1|557520,Poptr1|557519,Poptr1|557521  
AT4G38300,AT4G38650 Poptr1|713272  
AT1G15110Poptr1|584627,Poptr1|579900,Poptr1|564577,Poptr1|55244  
AT2G03430 Poptr1|659236  
AT4G19150 Poptr1|343520,Poptr1|590121  
Poptr1|659468  
Poptr1|644954  
Poptr1|571247  
AT5G13970 Poptr1|553118,Poptr1|572861  
AT5G13310 Poptr1|646970  
Poptr1|579188  
AT4G24830 Poptr1|725430,Poptr1|655770  
AT5G01350 Poptr1|560927,Poptr1|668059  
AT2G23930,AT3G11500 Poptr1|735362,Poptr1|717665  
AT3G54440 Poptr1|62897,Poptr1|693166  
AT2G44700,AT2G44630,AT4G02310,AT2G22030,AT2G22050,AT2G41360,AT3G46050,AT5G03000,AT5G03010,AT5  
G03020,AT5G02980,AT5G02990,AT2G44030,AT1G77880,AT4G19865,AT4G19870,AT4G19330,AT4G19250,AT4G39  
060,AT4G39760,AT5G28180,AT5G28160,AT4G39753,AT4G39756,AT4G39750,AT4G35120,AT4G29370,AT5G39560,  
AT4G39560,AT4G39550,AT5G49000,AT4G39570,AT1G19930,AT1G60570,AT2G03460,AT5G51250,AT3G08810,AT3  
G06570,AT4G25710,AT5G38680,AT5G38670,AT2G20380,AT5G48990,AT5G48980,AT4G39600,AT4G39580,AT4G05  
620,AT2G22060,AT1G48190,AT1G61540,AT4G39590,AT4G11750,AT4G11770,AT4G11745,AT4G23580,AT4G33900,  
AT4G34170,AT4G39290,AT3G43710,AT4G14905,AT4G39240,AT3G27910,AT2G29800,AT2G29600,AT2G29810,AT2  
G29770,AT2G29780,AT2G29820,AT2G29830,AT2G29860,AT2G29610,AT1G19470,AT1G19460,AT2G21680,AT3G10  
510,AT4G38940,AT4G36840,AT3G24610  
AT2G21950 Poptr1|75839  
AT5G41480 Poptr1|100141  
Poptr1|559206,Poptr1|643653  
AT4G08230  
AT4G25330 Poptr1|644992  
AT1G73165 Poptr1|568620,Poptr1|550296  
Poptr1|644036  
Poptr1|65288,Poptr1|557513,Poptr1|557515,Poptr1|65287  
AT5G57490 Poptr1|580465,Poptr1|669455  
Poptr1|700129  
AT5G15090,AT3G01280 Poptr1|565435,Poptr1|696288,Poptr1|701809  
AT5G37610 Poptr1|664752  
AT1G35513,AT1G74710,AT1G18870 Poptr1|569985  
AT3G49920,AT5G67500 Poptr1|693597,Poptr1|716342  
Poptr1|569990  
AT5G65950 Poptr1|65845  
AT2G39810 Poptr1|553900,Poptr1|589888  
AT1G04290 Poptr1|714548,Poptr1|556283  
AT2G29590 Poptr1|723121  
AT5G57890,AT1G25220,AT1G24909,AT1G25083,AT1G25155,AT1G24807 Poptr1|354335,Poptr1|566399  
Poptr1|61931  
AT2G39470 Poptr1|353502,Poptr1|698604  
AT3G55330 Poptr1|353500,Poptr1|567482  
AT1G72050 Poptr1|703211,Poptr1|738809  
AT1G77320 Poptr1|51993  
AT2G37190,AT3G53430,AT5G60670  
Poptr1|593270,Poptr1|683502,Poptr1|584586,Poptr1|682272,Poptr1|107773  
AT3G21360 Poptr1|548918  
Poptr1|593316,Poptr1|578095,Poptr1|566686,Poptr1|579694,Poptr1|589799  
Poptr1|71530  
AT1G64170  
Poptr1|659292  
AT3G44930,AT3G44920,AT3G44910,AT5G22910  
AT2G31910,AT1G05580 Poptr1|75561  
AT1G79400,AT1G16380 Poptr1|555074,Poptr1|555075  
AT2G13620 Poptr1|562475  
Poptr1|650607  
Poptr1|106838  
AT4G23700 Poptr1|569937,Poptr1|585363,Poptr1|554441  
AT3G53720 Poptr1|351559  
AT5G58460,AT5G37060 Poptr1|64707  
AT3G52080 Poptr1|64534,Poptr1|557790  
AT5G01690,AT5G01680 Poptr1|577087  
Poptr1|565499  
Poptr1|75670  
AT2G30240,AT1G06970  
AT3G17630 Poptr1|565496  
Poptr1|571863,Poptr1|574538  
AT2G28170  
AT1G08135,AT1G08140,AT1G08150,AT2G28180,AT3G44900,AT5G22900  
Poptr1|578666,Poptr1|352416,Poptr1|561401  
AT5G41610 Poptr1|709220  
Poptr1|567273,Poptr1|562498  
Poptr1|545794  
AT5G48960 Poptr1|720206  
AT5G45170  
Poptr1|575523

AT5G62530 Poptr1|640873,Poptr1|704277  
AT3G51130Poptr1|76395,Poptr1|593877  
AT1G19080 Poptr1|567274,Poptr1|696784  
AT1G69485,AT1G26740 Poptr1|656465,Poptr1|659270  
Poptr1|728707  
Poptr1|714386  
AT5G38640,AT2G44070  
AT1G48970 Poptr1|648300,Poptr1|690088,Poptr1|729107  
AT2G22530 Poptr1|76448  
AT1G10800 Poptr1|595676,Poptr1|572902  
AT3G27180 Poptr1|49208  
AT4G08200 Poptr1|587927  
AT5G41980 Poptr1|355473  
AT5G35695  
Poptr1|582144,Poptr1|573599  
Poptr1|585621,Poptr1|597645,Poptr1|349494,Poptr1|596445,Poptr1|591125,Poptr1|346488,Poptr1|59112  
7,Poptr1|571375,Poptr1|585777,Poptr1|592331  
Poptr1|594676  
Poptr1|583933,Poptr1|558195,Poptr1|64761,Poptr1|587582  
AT4G21720 Poptr1|555816  
AT3G13780 Poptr1|597692  
Poptr1|554498,Poptr1|63418  
AT1G64430 Poptr1|554499  
AT3G18730 Poptr1|75568  
Poptr1|691711,Poptr1|577383  
AT5G51120Poptr1|575507,Poptr1|588178  
AT5G10350,AT5G65260 Poptr1|558510,Poptr1|718737  
AT5G54130,AT5G54120 Poptr1|345771  
AT1G02270 Poptr1|348188  
AT5G10940 Poptr1|347445,Poptr1|559027  
AT3G29370,AT5G39240 Poptr1|577741,Poptr1|648545  
AT1G54990 Poptr1|729591  
AT3G15380 Poptr1|728405  
AT2G27100 Poptr1|679868,Poptr1|648999  
Poptr1|648996,Poptr1|648998  
Poptr1|679869  
AT4G12640 Poptr1|700645  
AT2G01070  
AT1G61670 Poptr1|351993  
AT1G10980  
AT1G72480 Poptr1|553620,Poptr1|553585,Poptr1|745832  
Poptr1|355336,Poptr1|640783  
Poptr1|107074  
AT2G23840 Poptr1|573904,Poptr1|730016  
AT4G38110Poptr1|708002  
Poptr1|667050,Poptr1|687849,Poptr1|555678,Poptr1|660782  
AT2G37600,AT3G53740,AT5G02450  
AT1G56320 Poptr1|581320,Poptr1|581948,Poptr1|570727  
Poptr1|564420  
AT5G42680 Poptr1|644155,Poptr1|677796  
AT2G21990,AT4G39610 Poptr1|592521,Poptr1|51748  
AT2G41660 Poptr1|576367,Poptr1|560483  
AT5G06990 Poptr1|555082,Poptr1|547789  
AT3G25640 Poptr1|656752,Poptr1|55290  
AT2G22460,AT5G65340  
AT2G37880 Poptr1|351829  
AT5G23100 Poptr1|569841  
AT1G21050,AT1G76610 Poptr1|560028,Poptr1|550705  
AT1G05910 Poptr1|594501,Poptr1|594503,Poptr1|75481,Poptr1|594506,Poptr1|594502,Poptr1|562244  
Poptr1|574425,Poptr1|574421,Poptr1|582739  
AT5G49960 Poptr1|596732  
Poptr1|596731,Poptr1|98691  
AT5G53080 Poptr1|574726  
AT2G35320 Poptr1|580091,Poptr1|356606  
Poptr1|596534,Poptr1|549854,Poptr1|65130  
AT2G44710 Poptr1|692469,Poptr1|591746  
Poptr1|575695  
Poptr1|655440,Poptr1|741275  
AT3G51510 Poptr1|569210,Poptr1|691931  
AT4G25440,AT5G51980 Poptr1|734107,Poptr1|687864  
Poptr1|594696  
AT5G40880,AT5G49200  
Poptr1|731002  
AT1G44414 Poptr1|596208,Poptr1|643614  
AT1G13360,AT3G25870 Poptr1|566632,Poptr1|686329  
AT3G07220,AT3G07260 Poptr1|711559  
Poptr1|558971,Poptr1|582021,Poptr1|108280,Poptr1|593799  
Poptr1|666965,Poptr1|687868  
AT2G46610,AT3G61860 Poptr1|552308,Poptr1|572428  
AT4G25500,AT5G52040  
Poptr1|644386,Poptr1|552113  
AT1G16430,AT1G07950 Poptr1|588031,Poptr1|564145



AT1G27020,AT1G27030  
AT1G07040 Poptr1|696290  
AT2G34585 Poptr1|746564  
AT1G73440 Poptr1|591662  
AT4G33480 Poptr1|562525  
AT5G45740  
AT1G53400 Poptr1|585497,Poptr1|660832  
AT1G16960  
AT1G73380 Poptr1|555581  
Poptr1|695541  
AT5G01440  
AT1G06900 Poptr1|571877  
AT3G57470,AT2G41790,AT3G57460  
AT1G48910  
AT1G21430 Poptr1|356866,Poptr1|559318,Poptr1|60673  
AT4G32540  
Poptr1|53364  
AT5G11320Poptr1|561834  
AT2G33230,AT1G04610 Poptr1|345480,Poptr1|565856  
AT4G28720 Poptr1|553273  
AT4G13260  
Poptr1|108101,Poptr1|108959  
AT5G25620 Poptr1|561795  
AT1G04180,AT5G43890  
Poptr1|583704  
AT3G51260,AT5G66140  
Poptr1|713304,Poptr1|649230,Poptr1|579893  
AT1G47250,AT5G42790 Poptr1|715245  
AT3G20490 Poptr1|569136  
AT1G21090 Poptr1|559383,Poptr1|710783  
AT3G03780,AT5G17920  
AT5G20980  
Poptr1|673833,Poptr1|738504,Poptr1|699903  
Poptr1|649045,Poptr1|594861  
AT3G56950 Poptr1|734665,Poptr1|652505  
AT5G03590 Poptr1|580291,Poptr1|567958,Poptr1|594288,Poptr1|105335  
AT3G12040 Poptr1|688729  
AT5G11240Poptr1|54883  
AT4G12670  
AT5G03780 Poptr1|550733  
AT1G01150  
AT3G21175,AT1G51600 Poptr1|687431  
Poptr1|577295,Poptr1|562361  
AT4G24470 Poptr1|692590,Poptr1|558987  
Poptr1|643943,Poptr1|72172,Poptr1|562359,Poptr1|577294,Poptr1|586229,Poptr1|562360  
AT5G66120 Poptr1|346349  
AT1G08060  
AT2G28240  
Poptr1|570689,Poptr1|595082,Poptr1|108404,Poptr1|581661  
Poptr1|580042  
AT1G51990  
Poptr1|576831  
AT1G21120,AT1G21110,AT1G21130,AT1G21100,AT1G76790,AT1G77530,AT1G77520,AT1G63140,AT5G37170,AT5  
G53810  
Poptr1|569257  
AT3G53140 Poptr1|702783  
AT5G54160 Poptr1|574641,Poptr1|661631  
Poptr1|348174,Poptr1|552360,Poptr1|688207,Poptr1|572473  
AT1G33030 Poptr1|579574,Poptr1|56062,Poptr1|707948  
Poptr1|551395,Poptr1|72518  
Poptr1|574287  
AT1G62900  
AT4G22930  
Poptr1|577626,Poptr1|53049  
AT4G30990 Poptr1|65061  
AT2G31040 Poptr1|572844  
AT5G46290 Poptr1|568454,Poptr1|714498  
Poptr1|691067,Poptr1|684839  
AT2G04540 Poptr1|692201  
Poptr1|108612  
Poptr1|585970,Poptr1|553799,Poptr1|671286  
Poptr1|646016  
AT1G74960 Poptr1|739215  
AT2G19940 Poptr1|581467  
AT5G43430 Poptr1|675322  
Poptr1|104512  
AT3G59650 Poptr1|683400  
AT3G49000 Poptr1|575830  
Poptr1|575829  
AT1G60060 Poptr1|726712  
Poptr1|591997  
Poptr1|559991

Poptr1|60556  
Poptr1|573906  
AT2G25010  
AT1G64255  
AT2G04865  
Poptr1|348535  
AT1G64260  
Poptr1|574084,Poptr1|596935  
AT1G49920  
Poptr1|597628  
Poptr1|586810,Poptr1|662944  
AT1G17930  
Poptr1|99006  
AT3G62330  
Poptr1|57167,Poptr1|710316  
Poptr1|671616,Poptr1|677246,Poptr1|60588,Poptr1|565731  
AT3G05440  
Poptr1|104482  
AT4G15755,AT3G16510  
Poptr1|671670,Poptr1|570806  
AT1G09070  
AT3G62780  
AT4G15740  
AT3G09500,AT3G55170,AT2G39390,AT5G02610  
Poptr1|653750,Poptr1|561515,Poptr1|563832,Poptr1|698616  
AT4G20410  
Poptr1|569307,Poptr1|705063  
Poptr1|575753,Poptr1|570518  
AT1G16560  
Poptr1|719127  
AT5G62130  
AT2G05840,AT5G35590  
Poptr1|577208,Poptr1|682259  
Poptr1|564604  
Poptr1|585268  
Poptr1|648372  
AT3G56790,AT3G55930,AT1G28060  
Poptr1|55568,Poptr1|353474  
Poptr1|667879,Poptr1|589480  
AT1G65260  
AT3G62450  
Poptr1|558493,Poptr1|562553  
AT1G27450  
Poptr1|679044  
Poptr1|581239  
AT1G80050,AT5G11160  
Poptr1|737230,Poptr1|694977  
AT4G22570,AT4G12440  
Poptr1|700137  
Poptr1|586391  
Poptr1|592052,Poptr1|595606  
Poptr1|701740,Poptr1|747735,Poptr1|708571  
Poptr1|547908  
AT1G55020  
Poptr1|595605,Poptr1|590319,Poptr1|729605  
AT1G67560  
Poptr1|354682,Poptr1|55007  
Poptr1|108955  
Poptr1|676870  
Poptr1|583250  
Poptr1|547905,Poptr1|354681,Poptr1|597461,Poptr1|592053  
Poptr1|680459  
AT3G22400  
Poptr1|686250,Poptr1|687106  
Poptr1|106902,Poptr1|583249  
AT3G45140  
Poptr1|63009,Poptr1|547909,Poptr1|697684  
AT1G17420,AT1G72520  
Poptr1|349431,Poptr1|704788  
Poptr1|572858  
AT1G30540  
Poptr1|684099,Poptr1|582573  
AT4G14220  
Poptr1|564804,Poptr1|566288  
Poptr1|597454,Poptr1|558369,Poptr1|558368  
Poptr1|650570  
AT5G22000  
Poptr1|685665,Poptr1|576461,Poptr1|691232  
AT2G01990,AT1G14630  
Poptr1|354352  
AT2G44250  
AT4G23390,AT2G20170,AT4G23350,AT4G23360,AT4G23380,AT4G23370  
AT5G25960,AT5G25950  
Poptr1|352730  
AT1G10190,AT4G15050,AT4G15056,AT4G15053,AT4G10210,AT4G10220,AT4G23080,AT5G37520,AT2G24950  
AT5G19170,AT3G48230  
Poptr1|100273  
AT2G44210  
Poptr1|570485  
AT5G18460  
Poptr1|702388,Poptr1|56681  
Poptr1|672718  
AT2G17750,AT2G19360  
AT1G70550,AT1G23340  
Poptr1|345540,Poptr1|55052  
Poptr1|352729  
AT1G10750  
AT3G13510,AT1G55360  
Poptr1|547589,Poptr1|684720  
AT2G27320,AT2G38255,AT2G35250,AT5G46820,AT5G46810,AT4G17860,AT5G46200,AT4G17505,AT5G25410,AT5  
G60380,AT5G25415,AT5G11660,AT5G05030,AT5G36770,AT5G36680  
AT5G50150  
Poptr1|699407

AT2G44240,AT2G44220  
AT2G03930  
AT5G56530  
AT4G34330,AT4G34320 Poptr1|54473,Poptr1|546652  
AT3G48640,AT3G28270,AT3G57100  
AT2G18630 Poptr1|593981,Poptr1|346430,Poptr1|655248,Poptr1|563094  
AT5G66670,AT5G66660,AT5G66675  
Poptr1|590448,Poptr1|550483,Poptr1|557611,Poptr1|552798,Poptr1|569246  
AT3G49490 Poptr1|666042,Poptr1|661625  
AT5G19855 Poptr1|549248,Poptr1|557854  
Poptr1|553522  
AT2G34670  
AT4G30130,AT2G19090  
Poptr1|579052,Poptr1|351691  
AT1G77500,AT1G21740 Poptr1|692735,Poptr1|559249  
Poptr1|703353,Poptr1|556663  
AT2G17110,AT4G35240 Poptr1|721554,Poptr1|546752  
AT1G20530 Poptr1|550788,Poptr1|559927  
Poptr1|584564  
AT5G54480 Poptr1|558477  
AT3G12690 Poptr1|564144,Poptr1|55425  
AT1G53700,AT3G14370 Poptr1|65686,Poptr1|569142  
AT3G27580 Poptr1|64806  
AT3G25250,AT4G13000 Poptr1|553228  
AT2G34650  
Poptr1|565633  
AT1G79250,AT1G16440  
AT5G47750 Poptr1|343985,Poptr1|57832  
AT5G62310 Poptr1|346133  
AT3G44610 Poptr1|594816,Poptr1|721502  
AT1G51170,AT3G20830 Poptr1|554961,Poptr1|547888  
AT1G45160  
AT2G20040 Poptr1|737642  
AT2G26700 Poptr1|575329  
AT5G55910,AT4G26610  
AT5G03640 Poptr1|59818  
Poptr1|581083  
AT3G45780 Poptr1|691593  
AT3G17850,AT1G48490 Poptr1|345788,Poptr1|733135  
AT5G58140 Poptr1|721231,Poptr1|595043  
AT2G36350,AT3G52890 Poptr1|676178  
AT2G44830 Poptr1|591775,Poptr1|347756  
Poptr1|353278  
AT5G40030 Poptr1|577552  
AT1G06320 Poptr1|559478  
AT5G48430  
AT1G03230,AT1G03220 Poptr1|643329  
Poptr1|706146,Poptr1|704209,Poptr1|581052,Poptr1|581050,Poptr1|97270,Poptr1|97266,Poptr1|591123,Poptr1|97264,Poptr1|675518,Poptr1|71834,Poptr1|571323,Poptr1|579301  
AT5G19100,AT5G19110  
AT5G19120 Poptr1|581834,Poptr1|566477,Poptr1|720032  
Poptr1|354945,Poptr1|560602  
AT1G72030 Poptr1|571051,Poptr1|742007  
Poptr1|717097  
AT1G54095  
AT2G09970,AT1G72510 Poptr1|673203,Poptr1|712244  
AT5G20670 Poptr1|589301  
Poptr1|580628,Poptr1|569375  
AT5G25840 Poptr1|349606,Poptr1|548908,Poptr1|58502  
AT3G22540,AT4G14819 Poptr1|566229,Poptr1|658510,Poptr1|564857  
AT2G25780 Poptr1|352759  
AT1G79770  
AT1G33940,AT5G18700 Poptr1|657597,Poptr1|565634  
AT1G05950 Poptr1|562245  
AT5G45775,AT4G18730,AT3G58700,AT2G42740  
Poptr1|728157,Poptr1|695206,Poptr1|568685,Poptr1|682238,Poptr1|347504  
AT3G04160 Poptr1|99744  
AT1G49770 Poptr1|65194  
Poptr1|702102  
AT4G31460  
AT3G10110,AT1G18320 Poptr1|557625,Poptr1|706629  
AT2G33793 Poptr1|580898,Poptr1|713978  
AT1G49470 Poptr1|673136,Poptr1|649490  
Poptr1|554107,Poptr1|676641  
AT1G55240,AT1G55230 Poptr1|555239,Poptr1|547642,Poptr1|547641,Poptr1|351037  
AT5G19870  
AT5G47400 Poptr1|589881  
AT5G47410  
AT3G07790 Poptr1|573072,Poptr1|552692  
Poptr1|662037  
Poptr1|108161,Poptr1|666531  
AT4G24690 Poptr1|728730,Poptr1|666533

Poptr1|711983,Poptr1|62910  
Poptr1|555252,Poptr1|62743  
AT3G58040,AT2G41980 Poptr1|561239  
AT3G61790 Poptr1|348081,Poptr1|688188  
AT5G53360  
AT4G27880  
Poptr1|577611  
AT3G13672  
Poptr1|574747,Poptr1|569555  
AT5G37930,AT1G66650,AT1G66630,AT5G62800,AT5G37870 Poptr1|703329,Poptr1|693825,Poptr1|555926  
Poptr1|590662  
AT3G61530,AT2G46110  
Poptr1|585192  
Poptr1|644525  
AT3G10210 Poptr1|560425  
AT4G35750 Poptr1|593780  
Poptr1|550815,Poptr1|694886  
AT1G14250,AT1G14240,AT1G14230,AT2G02970 Poptr1|687269,Poptr1|353841  
Poptr1|579220,Poptr1|594913,Poptr1|556869  
AT5G19490  
Poptr1|558167,Poptr1|548700  
AT3G12480 Poptr1|647368,Poptr1|683549  
AT5G62950,AT3G28956 Poptr1|558454  
Poptr1|586634  
AT1G24290 Poptr1|568187  
AT4G16720,AT4G17390  
Poptr1|551992,Poptr1|683213  
Poptr1|587404  
Poptr1|646125,Poptr1|676405,Poptr1|740725  
Poptr1|674753  
Poptr1|671567  
AT4G16460 Poptr1|575910,Poptr1|652426  
AT5G63830 Poptr1|350399  
AT5G10920 Poptr1|684458  
Poptr1|108844  
Poptr1|712931  
AT1G11760  
AT3G50040  
AT3G59670 Poptr1|574407,Poptr1|582751  
AT4G38260 Poptr1|741857  
AT1G20680,AT1G20740  
Poptr1|73164  
AT5G54600 Poptr1|730292  
AT5G63220 Poptr1|655962,Poptr1|659817  
AT5G16200,AT1G66890 Poptr1|555877,Poptr1|589684  
AT1G68430 Poptr1|656844,Poptr1|658854  
AT5G21430 Poptr1|352614  
Poptr1|597102,Poptr1|691667,Poptr1|575429,Poptr1|570323  
AT3G26890,AT5G41110  
AT4G00231 Poptr1|564893,Poptr1|572162,Poptr1|572161  
AT5G39960 Poptr1|596800  
AT4G38510 Poptr1|546263,Poptr1|697166  
AT1G20260,AT1G76030  
AT4G37020 Poptr1|76121  
AT5G41270 Poptr1|554366  
AT5G64150 Poptr1|577783,Poptr1|555188,Poptr1|547587  
AT1G11320Poptr1|73077  
AT2G20790 Poptr1|657933  
AT4G28060,AT5G57815 Poptr1|702207  
AT1G22450 Poptr1|643802,Poptr1|651246  
AT1G32710  
Poptr1|588314  
AT5G01780  
Poptr1|553802,Poptr1|349665  
AT3G14140,AT3G14160  
AT3G52120 Poptr1|697489,Poptr1|706458  
AT5G37475,AT1G66070 Poptr1|714224,Poptr1|645149  
Poptr1|552865,Poptr1|348697,Poptr1|645160,Poptr1|645158  
Poptr1|597221,Poptr1|748684,Poptr1|597224  
AT2G44870 Poptr1|694046  
AT3G24280,AT4G13520 Poptr1|565848,Poptr1|682364  
AT3G11640,AT3G52480 Poptr1|576520,Poptr1|352443  
AT4G39850 Poptr1|685173,Poptr1|695890  
Poptr1|571505  
AT3G15160 Poptr1|687620  
Poptr1|584523,Poptr1|716990  
AT5G58110  
Poptr1|579562  
Poptr1|354532  
Poptr1|564868  
AT2G15880,AT4G33970,AT3G19020 Poptr1|54485  
AT5G15780

AT2G43150 Poptr1|587814  
AT1G76930 Poptr1|576227,Poptr1|665288  
AT1G72790  
AT1G61080 Poptr1|555540  
Poptr1|646992,Poptr1|640085  
AT4G16980  
AT3G54590,AT3G54580,AT3G28550,AT1G23720,AT4G08400,AT4G08410,AT5G49080,AT5G06630,AT2G24980,AT5  
G06640,AT5G35190,AT4G13390  
AT4G28380 Poptr1|594658,Poptr1|75306  
Poptr1|566097  
AT3G22800 Poptr1|566202  
AT5G11990  
AT5G59170,AT2G27380  
Poptr1|581245  
AT1G56530  
AT5G14920 Poptr1|706691  
AT3G24480,AT4G13340 Poptr1|99654,Poptr1|585226,Poptr1|669289  
AT1G22420  
AT5G57070 Poptr1|561029  
AT5G48920  
Poptr1|58524,Poptr1|654057  
AT5G25550  
AT5G26070,AT5G26080,AT3G20850,AT5G19800,AT5G19810  
AT1G15825  
AT5G43770  
Poptr1|562444,Poptr1|71500  
AT1G62440,AT1G12040 Poptr1|99210,Poptr1|351732  
AT1G12810  
Poptr1|72260  
AT1G43790  
AT2G27390 Poptr1|675464  
AT5G55750  
AT3G50570,AT3G50580  
Poptr1|590297  
AT2G33520  
AT4G27850 Poptr1|108032  
AT1G79480 Poptr1|564167  
Poptr1|697772  
AT1G72600  
AT4G38770 Poptr1|679425  
AT4G11430  
AT5G17340  
AT4G22470  
AT1G23040,AT1G70990,AT1G02405 Poptr1|566504,Poptr1|564605  
Poptr1|577367  
AT3G43583  
AT4G15160,AT3G22120 Poptr1|734547  
Poptr1|577341  
Poptr1|675187  
Poptr1|647247  
Poptr1|669671  
AT1G26240,AT1G26250,AT4G08380,AT4G08370  
Poptr1|675176  
AT4G00890 Poptr1|589196  
AT2G28440  
AT4G06744 Poptr1|549928,Poptr1|557414,Poptr1|591994  
AT3G19070  
AT1G31250  
Poptr1|681853,Poptr1|597100  
AT1G54215 Poptr1|553619  
AT1G21310 Poptr1|694617,Poptr1|643502  
Poptr1|662096  
AT3G29570  
Poptr1|551356  
AT1G49750,AT3G19320  
Poptr1|564027,Poptr1|349790  
Poptr1|565347  
AT3G22070 Poptr1|594426,Poptr1|562325  
AT1G49490  
AT4G18670  
AT5G08720 Poptr1|71592  
AT3G54960  
AT5G60640 Poptr1|686924  
AT1G52260,AT3G16110 Poptr1|107981,Poptr1|705732,Poptr1|705731  
Poptr1|353390  
AT1G48605,AT3G18030 Poptr1|575289,Poptr1|575291  
AT3G01450,AT3G18530,AT5G14790  
AT4G15830 Poptr1|587318,Poptr1|747393,Poptr1|587310,Poptr1|587317,Poptr1|565599  
Poptr1|64084  
AT2G16270,AT1G16630 Poptr1|550042  
AT3G26000 Poptr1|565083

AT2G01620  
Poptr1|64886  
AT3G27290  
Poptr1|354281  
Poptr1|562878  
AT5G15200,AT5G39850  
Poptr1|585702  
Poptr1|698986,Poptr1|576570,Poptr1|680135  
Poptr1|577830,Poptr1|712471  
Poptr1|748598  
AT5G15170  
Poptr1|694056  
AT1G26550  
Poptr1|579151,Poptr1|656463  
AT2G45320  
Poptr1|580558  
AT2G27402,AT2G32180,AT2G32650  
Poptr1|664772  
Poptr1|674936  
AT1G78620  
Poptr1|728254  
AT3G52760,AT2G36300  
Poptr1|556912,Poptr1|594860  
Poptr1|107756,Poptr1|545301,Poptr1|60411  
Poptr1|576556,Poptr1|344534  
AT4G25040  
Poptr1|701051,Poptr1|699355,Poptr1|65013  
AT1G03700,AT4G03540  
Poptr1|690033,Poptr1|704531  
Poptr1|594929  
Poptr1|345122  
AT4G15610  
Poptr1|657691  
AT5G44550,AT4G20390  
Poptr1|699220,Poptr1|642470  
AT5G15290  
Poptr1|661459  
AT3G06390  
AT3G11550,AT5G06200  
Poptr1|649254,Poptr1|561467  
AT1G14160  
AT2G36100  
AT2G27370  
Poptr1|577690  
AT1G17200  
Poptr1|699161,Poptr1|691892  
AT5G54980  
Poptr1|659718  
AT3G14380  
AT4G04880  
Poptr1|705259  
AT3G29265  
AT4G08056,AT3G30843,AT3G29220  
AT3G29470,AT2G04135,AT5G33303  
Poptr1|53271  
AT5G32482  
AT4G39670  
Poptr1|566636,Poptr1|354161  
AT2G34690  
Poptr1|576352,Poptr1|585335,Poptr1|685798  
Poptr1|657941  
AT4G15530  
Poptr1|565688  
Poptr1|688121  
AT4G22756,AT4G12110,AT4G22753  
Poptr1|350114,Poptr1|743964  
AT1G07420,AT2G29390  
Poptr1|723202,Poptr1|48995  
AT1G17160  
Poptr1|568842  
AT1G75380,AT1G19660  
Poptr1|651965,Poptr1|643079  
AT5G66050  
Poptr1|593771  
Poptr1|747207,Poptr1|586956,Poptr1|348852,Poptr1|581142,Poptr1|579741,Poptr1|101607  
AT3G44860,AT3G44870,AT3G44840,AT1G66690,AT1G66700,AT1G66720,AT5G38100,AT5G38780,AT5G37970,AT5G37990  
Poptr1|597744,Poptr1|553029  
AT1G15125  
Poptr1|75747  
AT4G26460  
Poptr1|585318  
AT1G68040  
Poptr1|573689,Poptr1|597761,Poptr1|573690,Poptr1|354311,Poptr1|566427,Poptr1|354312  
AT4G26420  
Poptr1|547567  
Poptr1|700844,Poptr1|699512  
Poptr1|348858,Poptr1|597742  
Poptr1|587447,Poptr1|586957  
AT2G47990  
Poptr1|57235,Poptr1|552640  
AT2G07690  
Poptr1|689167,Poptr1|344472  
Poptr1|554630,Poptr1|48624  
AT5G46280  
Poptr1|545797  
AT2G16440  
Poptr1|557197  
AT4G02060  
Poptr1|572618  
Poptr1|663436  
Poptr1|663435  
AT5G44635  
Poptr1|64865,Poptr1|588120  
AT2G14050  
Poptr1|106847,Poptr1|573677  
Poptr1|576647  
AT1G44900  
AT3G09660  
Poptr1|59144  
Poptr1|708884  
AT4G27580,AT5G54095,AT3G49540  
Poptr1|355441,Poptr1|569691,Poptr1|574623  
AT3G11520  
Poptr1|560353,Poptr1|688677  
Poptr1|594995,Poptr1|721275,Poptr1|694393  
AT1G20590,AT1G20610,AT1G76310  
Poptr1|642820,Poptr1|652211  
AT1G16330  
Poptr1|564169,Poptr1|567093

AT2G01310 Poptr1|566417  
AT1G44110Poptr1|72495  
Poptr1|583990  
AT1G34460,AT5G06150  
Poptr1|107993  
AT4G35620,AT2G17620  
AT5G43080,AT1G47210,AT1G47230,AT1G47220 Poptr1|592021,Poptr1|709971  
AT1G80370,AT1G15570 Poptr1|548650,Poptr1|343332  
AT5G11300,AT5G25380 Poptr1|685523,Poptr1|58529  
AT1G77390  
Poptr1|592754  
AT1G14750  
AT4G37490  
AT2G26760 Poptr1|64600  
AT5G15880 Poptr1|580755,Poptr1|556168  
AT3G42800 Poptr1|577791,Poptr1|561019  
AT5G12050  
AT3G13980,AT1G54200 Poptr1|577985,Poptr1|352622,Poptr1|640618,Poptr1|693740  
AT1G73970 Poptr1|567879,Poptr1|563535,Poptr1|563534  
AT4G05420,AT4G21100 Poptr1|65412  
Poptr1|568569,Poptr1|103023  
AT4G34420,AT2G15730 Poptr1|97493  
Poptr1|703099  
AT3G50620 Poptr1|719304,Poptr1|651057  
AT1G70200 Poptr1|657093  
AT2G46000 Poptr1|700229  
AT1G79070 Poptr1|655951,Poptr1|569194,Poptr1|553782  
Poptr1|553122,Poptr1|700681  
AT3G07020  
AT1G43620 Poptr1|586182,Poptr1|692792,Poptr1|714746  
Poptr1|553450  
AT4G15010  
Poptr1|574900,Poptr1|573142  
Poptr1|587018,Poptr1|346481  
AT1G21600 Poptr1|551414  
AT2G16710,AT2G36260 Poptr1|725436,Poptr1|655771  
Poptr1|586645  
Poptr1|578480  
Poptr1|709118,Poptr1|554521  
AT5G42030  
AT3G49290,AT5G24310 Poptr1|569570  
Poptr1|563203,Poptr1|593900  
AT4G05170,AT4G21340  
AT1G61660  
AT1G05710,AT2G31730 Poptr1|582754  
AT3G20640 Poptr1|727760,Poptr1|647663,Poptr1|571442  
AT1G31050  
Poptr1|698595,Poptr1|656060  
AT2G20100,AT4G29100  
AT1G27660 Poptr1|651969,Poptr1|643076  
Poptr1|645971,Poptr1|640889,Poptr1|578495  
AT1G49830,AT3G19500  
Poptr1|658647,Poptr1|657057  
Poptr1|560604,Poptr1|578948  
AT3G15760,AT1G52565 Poptr1|681806  
AT1G13810 Poptr1|698659  
AT1G67660 Poptr1|565926  
AT5G52440 Poptr1|701206,Poptr1|699319  
AT1G18720,AT1G74440 Poptr1|587598,Poptr1|696708  
Poptr1|108896  
AT3G15395 Poptr1|352648,Poptr1|579485  
Poptr1|587755,Poptr1|657971,Poptr1|690212  
AT5G24860,AT5G10625,AT4G31380 Poptr1|586327,Poptr1|98451  
Poptr1|54745  
AT1G32810 Poptr1|569280,Poptr1|661270,Poptr1|550450  
AT5G62820 Poptr1|666460,Poptr1|570082  
AT5G40300  
AT2G36330  
AT3G07210 Poptr1|553198  
AT1G23440  
AT1G56700 Poptr1|570680,Poptr1|671512,Poptr1|576669  
AT5G49220 Poptr1|582126,Poptr1|595912,Poptr1|583977,Poptr1|697769,Poptr1|680668  
AT1G03610,AT4G03420 Poptr1|571766,Poptr1|580373  
AT1G15030,AT2G01260 Poptr1|719815,Poptr1|658850  
AT5G08360,AT5G23380  
AT4G16100  
AT4G28150  
AT1G73210,AT1G17830 Poptr1|584513,Poptr1|61173  
AT5G20680  
AT5G15890  
AT2G40320 Poptr1|659453,Poptr1|696766  
AT2G31120Poptr1|107429

AT4G25360 Poptr1|666927,Poptr1|346122  
AT1G78710  
AT1G60790 Poptr1|566048  
AT2G30010  
AT3G11570,AT5G06230 Poptr1|352478,Poptr1|735300  
Poptr1|568771  
AT5G01620 Poptr1|577055  
Poptr1|48451  
AT5G01360 Poptr1|668061  
Poptr1|568770,Poptr1|585723  
Poptr1|597196,Poptr1|343868  
AT2G40160  
Poptr1|106460  
AT5G58600 Poptr1|64658,Poptr1|697452  
AT5G06700,AT3G12060 Poptr1|701393,Poptr1|685644  
AT1G48880 Poptr1|715770  
Poptr1|574344  
AT5G20590 Poptr1|736614,Poptr1|344186  
Poptr1|743670,Poptr1|556169,Poptr1|693937  
Poptr1|551355  
AT2G40150,AT3G55990 Poptr1|564043,Poptr1|698491  
AT1G73140 Poptr1|65591  
AT3G28150 Poptr1|569191  
AT5G15900 Poptr1|693936  
Poptr1|559537,Poptr1|551191  
AT3G06080,AT5G19160 Poptr1|721046  
AT2G42570 Poptr1|592181,Poptr1|689308  
AT2G14530 Poptr1|697402  
AT4G01080,AT1G01430  
AT5G40180 Poptr1|592185,Poptr1|650618  
AT5G51640  
AT2G31110  
AT3G62390 Poptr1|572610,Poptr1|552530  
AT5G64470 Poptr1|108799,Poptr1|65354  
AT5G49340 Poptr1|354056  
AT5G64480 Poptr1|650619  
AT3G54260 Poptr1|696997  
Poptr1|564046,Poptr1|353694  
AT3G11030  
AT4G11090,AT4G23790 Poptr1|48695,Poptr1|350328,Poptr1|552252,Poptr1|700275  
AT2G34070,AT1G29050 Poptr1|647882,Poptr1|568734  
AT2G30900 Poptr1|545851  
AT3G14850 Poptr1|594246,Poptr1|660821  
AT2G38320 Poptr1|58221  
Poptr1|106330,Poptr1|567252,Poptr1|353692  
AT3G02440 Poptr1|580753,Poptr1|562486  
AT1G70230 Poptr1|564772,Poptr1|698121  
Poptr1|567254  
AT2G37720,AT5G64020 Poptr1|558432,Poptr1|580999,Poptr1|562485  
AT5G04010 Poptr1|351458  
AT5G23330,AT5G08340 Poptr1|107604,Poptr1|53236,Poptr1|558658  
Poptr1|597612  
AT1G28210 Poptr1|559037  
Poptr1|108248  
AT1G80030  
AT5G48030 Poptr1|64592,Poptr1|697485  
AT5G18140 Poptr1|573927  
AT3G17830 Poptr1|575039  
AT3G13310 Poptr1|704511,Poptr1|550642,Poptr1|562450  
Poptr1|560058  
AT5G59610 Poptr1|708909  
AT4G09350 Poptr1|592274  
AT2G22360,AT4G39960 Poptr1|51710,Poptr1|695876  
AT2G17880,AT4G36040 Poptr1|559844,Poptr1|550872,Poptr1|710398,Poptr1|713253  
Poptr1|590638  
AT1G25540 Poptr1|656780,Poptr1|656781,Poptr1|55283  
Poptr1|587419,Poptr1|569863  
AT2G35790 Poptr1|724922,Poptr1|724910,Poptr1|563771  
AT5G11560Poptr1|578090,Poptr1|344674  
AT5G58240 Poptr1|729295,Poptr1|47956  
AT3G06360  
AT5G18690 Poptr1|354868  
AT2G47930 Poptr1|103119,Poptr1|573515,Poptr1|572749  
Poptr1|654349  
AT5G17000,AT5G16970,AT5G16990,AT5G16980,AT3G03080,AT1G26320,AT5G37940,AT5G38000,AT5G37980,AT5  
G16960,AT3G59845  
Poptr1|585062,Poptr1|585060,Poptr1|102925,Poptr1|102923  
Poptr1|107003  
Poptr1|351619,Poptr1|344182  
Poptr1|585057,Poptr1|673777  
Poptr1|585056,Poptr1|673264,Poptr1|680901  
Poptr1|562100,Poptr1|718141,Poptr1|585090,Poptr1|585084,Poptr1|99566,Poptr1|705261,Poptr1|585093,



Poptr1|585082,Poptr1|695721,Poptr1|718149,Poptr1|718156  
 AT5G37960  
 AT1G65560 Poptr1|567152  
     Poptr1|585075  
     Poptr1|585131  
     Poptr1|102926,Poptr1|585055,Poptr1|585053  
 AT5G16210 Poptr1|545378  
     Poptr1|708243,Poptr1|555172  
 AT1G55535,AT3G13420  
     Poptr1|579068  
     Poptr1|580229,Poptr1|591298  
     Poptr1|660512  
     Poptr1|677425,Poptr1|591284,Poptr1|680715  
 AT5G38360 Poptr1|555856  
     Poptr1|545745,Poptr1|577612  
 AT1G18800,AT1G74560 Poptr1|661875,Poptr1|671320  
 AT2G35480,AT1G32260 Poptr1|590048,Poptr1|554050,Poptr1|579145  
 AT1G55590 Poptr1|582522  
 AT2G17020  
 AT3G14920 Poptr1|568803  
 AT5G05480 Poptr1|564071,Poptr1|567232  
 AT2G19350,AT4G29850 Poptr1|695495,Poptr1|689192  
 AT5G52180 Poptr1|575794  
 AT2G41560,AT3G57330 Poptr1|734863,Poptr1|344123  
 AT3G63380 Poptr1|651823,Poptr1|346931  
     Poptr1|351607,Poptr1|560643  
 AT1G07810,AT1G07670 Poptr1|745456  
     Poptr1|351237,Poptr1|579002  
     Poptr1|597178,Poptr1|571012,Poptr1|742035,Poptr1|571030  
     Poptr1|576231  
     Poptr1|350815,Poptr1|100697  
 AT1G10130 Poptr1|572023,Poptr1|347573  
     Poptr1|694465  
 AT3G22910 Poptr1|566178,Poptr1|345426  
     Poptr1|597177  
 AT1G27770 Poptr1|730789  
     Poptr1|596143,Poptr1|572024  
 AT5G53010  
     Poptr1|736639,Poptr1|579003,Poptr1|652846  
 AT5G57110,AT4G29900  
 AT4G00900 Poptr1|731397  
     Poptr1|597176  
     Poptr1|575905,Poptr1|575906  
 AT3G21180 Poptr1|697031,Poptr1|725300  
     Poptr1|582400  
     Poptr1|106507  
 AT2G22950,AT4G37640 Poptr1|72114,Poptr1|349838  
 AT3G05090 Poptr1|595488  
 AT5G14220 Poptr1|64925  
     Poptr1|579590  
 AT3G10050 Poptr1|689409  
     Poptr1|597585  
     Poptr1|558653  
 AT5G05657  
 AT2G27270  
     Poptr1|717618  
 AT5G22200,AT3G44220 Poptr1|558191  
 AT5G22870  
 AT5G53730 Poptr1|666026,Poptr1|661635  
 AT4G01410 Poptr1|552356,Poptr1|572469  
 AT4G09590,AT2G35970,AT2G35960,AT3G52470,AT3G11660,AT5G06330 Poptr1|695193,Poptr1|735260  
     Poptr1|649671,Poptr1|642084  
 AT4G37540  
     Poptr1|551790,Poptr1|594202,Poptr1|572049  
 AT1G68510  
     Poptr1|566622,Poptr1|354173,Poptr1|355573  
 AT5G67420,AT3G49940  
 AT1G67100,AT3G02550 Poptr1|97098,Poptr1|546472  
     Poptr1|553956,Poptr1|716322  
 AT1G43710 Poptr1|692781,Poptr1|685320  
 AT2G22270,AT4G39860  
     Poptr1|694315,Poptr1|562605  
 AT1G78150,AT1G35780 Poptr1|685266,Poptr1|710987  
     Poptr1|577104  
 AT5G62550  
     Poptr1|101467,Poptr1|581358  
 AT3G59710 Poptr1|745034  
     Poptr1|552142,Poptr1|552144,Poptr1|748333,Poptr1|552140,Poptr1|584359,Poptr1|572216,Poptr1|70552  
 3  
     Poptr1|649001  
 AT1G01800  
     Poptr1|107054,Poptr1|705430,Poptr1|680760,Poptr1|572215,Poptr1|552141

AT5G51030,AT5G61830 Poptr1|666781,Poptr1|570377,Poptr1|593272  
AT2G24190,AT3G61220 Poptr1|552146  
Poptr1|681143,Poptr1|742665  
AT4G14520 Poptr1|658420  
AT3G22900  
AT4G14660 Poptr1|566143,Poptr1|682368  
AT1G17850 Poptr1|96970  
AT5G67230  
AT4G36890 Poptr1|562934,Poptr1|716281  
Poptr1|560600,Poptr1|736567  
AT2G25490 Poptr1|737202,Poptr1|561896  
AT4G15475  
AT5G25350  
Poptr1|545602  
AT4G01290 Poptr1|572302,Poptr1|552204  
AT4G30260,AT2G18840 Poptr1|580466,Poptr1|578606  
AT4G32900  
Poptr1|561744  
AT3G03010  
AT5G16870 Poptr1|689928,Poptr1|665401  
AT1G05820,AT2G43070 Poptr1|684205,Poptr1|581829  
Poptr1|664694  
Poptr1|664695  
AT1G01650 Poptr1|692394  
AT1G63690 Poptr1|548453,Poptr1|712509  
AT5G05350,AT3G10980 Poptr1|567196,Poptr1|577107  
AT3G03070 Poptr1|681203  
AT4G12540 Poptr1|595426  
AT3G55350 Poptr1|563855  
Poptr1|578838  
AT3G63270 Poptr1|551142  
Poptr1|65196  
AT5G53650 Poptr1|569627,Poptr1|666073  
Poptr1|576712  
AT1G70280,AT1G23880 Poptr1|726669,Poptr1|564786,Poptr1|656832  
AT3G14860 Poptr1|746373,Poptr1|699059  
AT5G14890  
AT1G23890 Poptr1|545465,Poptr1|552955  
AT4G28395 Poptr1|654385,Poptr1|562155,Poptr1|594653  
AT2G39950 Poptr1|563981,Poptr1|698528  
AT3G15630,AT1G52720 Poptr1|645881,Poptr1|709580  
AT5G47480,AT5G47490 Poptr1|349734,Poptr1|356467  
AT3G17150 Poptr1|563515,Poptr1|106364,Poptr1|560054,Poptr1|582334  
AT5G62840 Poptr1|733292  
AT3G48620  
AT5G19620 Poptr1|554969,Poptr1|62971  
AT3G44160 Poptr1|64156,Poptr1|558214  
AT4G02110Poptr1|572632,Poptr1|552514  
AT1G33660  
AT4G35970  
AT4G08390  
AT1G77490 Poptr1|559250,Poptr1|342411  
AT4G35000 Poptr1|556634,Poptr1|557084  
Poptr1|679120  
AT1G07890  
AT3G09640 Poptr1|576642,Poptr1|675956,Poptr1|560799,Poptr1|560797,Poptr1|650416  
AT4G32320 Poptr1|561901  
Poptr1|582463  
AT4G04670 Poptr1|685149  
AT2G01710 Poptr1|551655,Poptr1|72202  
AT3G04960,AT4G27980,AT3G05110  
Poptr1|583245  
Poptr1|581015  
AT2G25560 Poptr1|63140,Poptr1|350618  
AT5G37380  
Poptr1|574808,Poptr1|355226  
AT5G50115  
AT5G18750,AT3G06340 Poptr1|354872,Poptr1|595526  
AT5G62780,AT4G19570,AT5G37750,AT5G37440,AT4G19590,AT4G19580  
AT5G53150  
AT1G09260  
AT2G35540 Poptr1|554071  
AT5G37760  
Poptr1|596087,Poptr1|657806  
AT2G05230,AT2G05250,AT5G35753 Poptr1|645000,Poptr1|664876  
Poptr1|570267  
AT3G04980,AT5G27240  
AT1G47660  
AT4G40090  
Poptr1|577368  
AT1G70590 Poptr1|108250,Poptr1|595316,Poptr1|354784,Poptr1|658283  
AT1G80290 Poptr1|583189

AT4G35540 Poptr1|545495  
 AT3G19780 Poptr1|75963  
 AT4G35080  
 AT2G16800 Poptr1|648800  
 AT5G37590  
 AT5G37580 Poptr1|545490  
 AT5G50190,AT4G30090 Poptr1|560679,Poptr1|695481  
 AT4G31340,AT2G24420 Poptr1|583174,Poptr1|586341,Poptr1|568764  
 Poptr1|553958,Poptr1|694452  
 Poptr1|651135  
 AT4G37550,AT4G37560  
 Poptr1|711657  
 AT5G41880  
 Poptr1|577930  
 AT2G19680,AT4G29480,AT4G26210 Poptr1|341790,Poptr1|683081  
 AT1G48635,AT3G18160 Poptr1|574968,Poptr1|345814  
 AT2G46580 Poptr1|644606,Poptr1|688190  
 AT3G20650 Poptr1|663315,Poptr1|663316,Poptr1|699128  
 AT5G13420 Poptr1|640120,Poptr1|646955,Poptr1|670245  
 AT1G48050 Poptr1|347864,Poptr1|700157  
 AT4G04910  
 Poptr1|580909,Poptr1|693940  
 AT3G53500,AT2G37340 Poptr1|653760  
 Poptr1|667717  
 AT3G56330 Poptr1|571638  
 AT3G27130 Poptr1|64947  
 AT3G24150 Poptr1|560586  
 AT4G32295 Poptr1|702017,Poptr1|694980  
 Poptr1|726714,Poptr1|643701  
 AT4G08550  
 AT3G11920  
 Poptr1|564762,Poptr1|566346  
 AT4G17760 Poptr1|676575  
 AT1G23380,AT1G70510 Poptr1|345543,Poptr1|658310  
 Poptr1|662052  
 Poptr1|662050  
 Poptr1|570713,Poptr1|581961  
 Poptr1|584721  
 AT1G62360 Poptr1|61066,Poptr1|568092  
 AT4G08150 Poptr1|710536  
 AT4G35985,AT2G17840 Poptr1|741222  
 AT4G15450,AT3G21600,AT3G21590  
 Poptr1|100488,Poptr1|580525,Poptr1|578537  
 Poptr1|697192,Poptr1|556629  
 AT3G51250  
 AT1G56190,AT3G12780 Poptr1|564182,Poptr1|724208  
 AT1G79550 Poptr1|564181,Poptr1|659332  
 Poptr1|104960  
 Poptr1|104879  
 AT5G13280  
 AT5G14060,AT3G02020 Poptr1|678626,Poptr1|572881  
 Poptr1|348906  
 AT1G08500 Poptr1|691487  
 Poptr1|572141  
 AT1G49710,AT3G19280 Poptr1|574355  
 AT3G07750 Poptr1|688348  
 AT1G04900 Poptr1|691701  
 AT1G22680,AT1G71970 Poptr1|48043,Poptr1|665754  
 AT5G63520  
 Poptr1|584712,Poptr1|568084,Poptr1|701030,Poptr1|570286,Poptr1|570288,Poptr1|585654,Poptr1|57028

7

AT4G13710,AT1G04680,AT3G24230  
 AT2G02720,AT1G14420  
 Poptr1|568062,Poptr1|567502  
 AT1G30350,AT1G11920  
 AT1G67750 Poptr1|565960,Poptr1|565107  
 AT3G27400 Poptr1|683929  
 AT5G55720 Poptr1|550208,Poptr1|568584  
 Poptr1|573211,Poptr1|588597,Poptr1|553124  
 AT3G54920  
 AT5G63180  
 Poptr1|695162,Poptr1|576605  
 AT4G24780 Poptr1|570188,Poptr1|575272  
 AT5G09280 Poptr1|51677,Poptr1|351024,Poptr1|62718  
 AT5G04310 Poptr1|563677,Poptr1|567676  
 AT3G55140 Poptr1|686510  
 AT3G01270,AT5G15110 Poptr1|564799,Poptr1|581348  
 AT5G48900,AT3G07010 Poptr1|547984,Poptr1|554820,Poptr1|343132  
 AT3G53190 Poptr1|739568  
 Poptr1|545910  
 AT4G22080,AT4G22090 Poptr1|99325,Poptr1|568064  
 AT4G13210,AT3G24670

AT3G09540  
 AT2G21080 Poptr1|98480,Poptr1|100063  
     Poptr1|570221  
 AT4G03820,AT4G22270  
 AT1G50630,AT3G20300 Poptr1|65395  
 AT1G67570 Poptr1|720920  
 AT1G75850 Poptr1|346669,Poptr1|52232,Poptr1|597398  
 AT3G51310  
     Poptr1|679106  
 AT2G17790 Poptr1|674080  
 AT2G40290,AT5G05470 Poptr1|659463,Poptr1|696771  
 AT5G19150 Poptr1|719850  
 AT1G08750 Poptr1|586803  
 AT3G50790  
 AT5G49950 Poptr1|596728  
     Poptr1|105131  
 AT1G34340 Poptr1|574301,Poptr1|593022  
     Poptr1|554558  
 AT3G55070 Poptr1|563817  
 AT2G20515 Poptr1|72887,Poptr1|346841  
     Poptr1|552213  
 AT5G12370 Poptr1|552212,Poptr1|572310  
 AT3G18630,AT2G10550 Poptr1|564199,Poptr1|567050  
 AT4G11385Poptr1|65944  
 AT5G49320 Poptr1|345210  
 AT3G57320 Poptr1|695562  
 AT4G21800 Poptr1|564369,Poptr1|566858  
     Poptr1|660051  
 AT1G51610  
 AT4G01210 Poptr1|342783,Poptr1|572331  
 AT5G04480  
 AT5G56680,AT1G70980 Poptr1|695309,Poptr1|582977  
 AT4G17300 Poptr1|718334,Poptr1|594529  
 AT1G68420,AT5G38750  
 AT3G07420 Poptr1|684138  
 AT3G23700 Poptr1|572912  
 AT1G75360,AT1G27670 Poptr1|72939,Poptr1|550990  
 AT1G79810 Poptr1|640890,Poptr1|645972  
 AT4G32690 Poptr1|578123,Poptr1|585726,Poptr1|695024  
 AT3G56010 Poptr1|659485,Poptr1|564055  
 AT5G40530 Poptr1|64812  
 AT2G36320,AT3G52800 Poptr1|713463,Poptr1|649133  
 AT4G12040,AT4G22820,AT1G12440 Poptr1|548563,Poptr1|712074  
 AT1G51200  
 AT4G25380  
     Poptr1|576317,Poptr1|704716,Poptr1|547885,Poptr1|682028  
     Poptr1|569186,Poptr1|695940  
     Poptr1|356347,Poptr1|570564  
 AT4G14225  
 AT2G27580  
 AT3G12630 Poptr1|722755  
 AT4G28840,AT2G20080 Poptr1|584049  
 AT3G63190 Poptr1|710069  
 AT2G46540 Poptr1|644598,Poptr1|572409  
 AT3G27460,AT5G40550 Poptr1|691587  
 AT3G03420 Poptr1|64862,Poptr1|553047  
 AT2G20260,AT4G28750 Poptr1|665098,Poptr1|645526  
 AT4G11190,AT4G11210,AT4G11180,AT4G23690,AT1G64160 Poptr1|646698,Poptr1|548385  
     Poptr1|640410,Poptr1|640411,Poptr1|711753,Poptr1|554440,Poptr1|554436,Poptr1|691098,Poptr1|55443  
 7  
 AT5G03570,AT2G38460 Poptr1|577096,Poptr1|668139,Poptr1|668140,Poptr1|734252,Poptr1|577095  
 AT5G45590 Poptr1|702968,Poptr1|693558  
     Poptr1|65310,Poptr1|104227,Poptr1|591502,Poptr1|691709  
 AT3G12240,AT3G12230,AT3G12220,AT3G12203,AT5G36180,AT1G73300,AT1G73280,AT1G73310,AT1G73290,AT1  
 G73270,AT3G10450,AT2G22970,AT2G22920,AT2G22990,AT2G23010,AT2G23000,AT2G22980,AT2G22960,AT1G33  
 540,AT5G09640 Poptr1|592165,Poptr1|60739  
     Poptr1|594321,Poptr1|49329  
     Poptr1|579260  
 AT4G20300 Poptr1|63262,Poptr1|554635  
     Poptr1|560315,Poptr1|576085  
 AT1G15790 Poptr1|103043,Poptr1|588926  
 AT1G15780,AT1G15770 Poptr1|548805,Poptr1|592675,Poptr1|645748,Poptr1|705137  
 AT2G10440  
     Poptr1|590553,Poptr1|349310,Poptr1|349338,Poptr1|597050,Poptr1|591629  
     Poptr1|62854  
     Poptr1|553513,Poptr1|349323,Poptr1|553518,Poptr1|553495,Poptr1|675741,Poptr1|640823,Poptr1|67701  
 2  
     Poptr1|592670,Poptr1|590554,Poptr1|703249,Poptr1|101554,Poptr1|588927,Poptr1|349341  
     Poptr1|590485  
 AT5G04710 Poptr1|563591  
 AT5G60160 Poptr1|346003,Poptr1|575322  
 AT3G06470,AT3G06460 Poptr1|553435,Poptr1|553436

AT1G24040 Poptr1|566331,Poptr1|564771  
Poptr1|355501  
AT2G37035 Poptr1|589453  
AT4G01140Poptr1|552241,Poptr1|572346  
AT3G08600 Poptr1|577225,Poptr1|589610  
AT4G23720 Poptr1|554446,Poptr1|63466  
AT4G27750 Poptr1|580605  
AT5G27830 Poptr1|699720,Poptr1|581892  
AT2G24820 Poptr1|597760,Poptr1|562021,Poptr1|669200,Poptr1|562022,Poptr1|578316  
Poptr1|674791,Poptr1|700702,Poptr1|710021,Poptr1|660564  
AT5G46430,AT4G18100  
AT3G23350  
AT1G08670 Poptr1|650271,Poptr1|683825,Poptr1|353550  
AT3G46540  
AT1G76980,AT1G21390 Poptr1|347189,Poptr1|559307  
AT5G49970  
Poptr1|651228,Poptr1|711107  
Poptr1|702236  
AT4G30620,AT2G24020  
AT1G26180 Poptr1|564433  
AT3G13782 Poptr1|595945,Poptr1|592782,Poptr1|579147,Poptr1|553454  
AT5G56950,AT4G26110,AT2G19480 Poptr1|695331  
AT1G01510 Poptr1|572304,Poptr1|692384  
AT3G23440 Poptr1|565790  
AT5G44060,AT1G04000 Poptr1|553333  
Poptr1|563635,Poptr1|356541  
AT3G10010  
AT4G34060  
Poptr1|356539  
AT2G36490  
AT5G04560 Poptr1|655818,Poptr1|563634,Poptr1|660203,Poptr1|60256,Poptr1|356540  
Poptr1|589566,Poptr1|725487  
AT5G13540 Poptr1|549388,Poptr1|647334  
AT3G18860 Poptr1|556434,Poptr1|722112  
AT2G07707 Poptr1|589114  
AT2G07734 Poptr1|592416,Poptr1|101791  
AT5G01070  
AT5G05830 Poptr1|696818,Poptr1|659590  
AT2G37950 Poptr1|747318,Poptr1|58156,Poptr1|653060  
AT2G34200  
AT5G59000 Poptr1|706067,Poptr1|723171  
AT4G31530  
Poptr1|64238  
AT4G15420 Poptr1|700573  
AT5G14710 Poptr1|641579  
AT1G74070 Poptr1|569844  
AT2G20820 Poptr1|571784,Poptr1|670553  
AT1G20460 Poptr1|550800  
Poptr1|642848,Poptr1|652180  
AT1G76185  
Poptr1|595106  
AT3G55030,AT2G39290 Poptr1|567527,Poptr1|720658  
Poptr1|672907  
AT5G58170,AT5G58050 Poptr1|352300,Poptr1|578776  
AT3G20520  
AT1G66970,AT1G66980,AT4G26690,AT5G55480  
Poptr1|352299,Poptr1|642264,Poptr1|691811,Poptr1|550159,Poptr1|550156  
AT5G38890 Poptr1|680752,Poptr1|663010  
AT1G09483,AT1G09470  
Poptr1|568721  
AT3G05830,AT5G26770 Poptr1|581608,Poptr1|729347  
AT2G14045 Poptr1|586802  
AT3G10130 Poptr1|735569  
AT5G49810 Poptr1|703809  
AT5G51170Poptr1|575515  
AT4G31700,AT5G10360 Poptr1|558503,Poptr1|562563,Poptr1|707258,Poptr1|551600,Poptr1|559071  
Poptr1|575833  
AT4G20850 Poptr1|687852  
AT1G28150 Poptr1|647785  
AT5G47560 Poptr1|716925  
AT1G54360 Poptr1|707589  
AT1G04950 Poptr1|552717,Poptr1|594367,Poptr1|688339  
AT5G05570 Poptr1|653137,Poptr1|593185,Poptr1|353689  
Poptr1|65327  
Poptr1|557558  
AT1G77180 Poptr1|100499,Poptr1|578522  
AT1G79200 Poptr1|51790,Poptr1|678771,Poptr1|562853  
AT2G07695 Poptr1|747176  
AT2G04900 Poptr1|573075  
AT4G33280 Poptr1|551892,Poptr1|551891,Poptr1|591874,Poptr1|551890  
Poptr1|570206  
AT2G39725 Poptr1|48530

AT1G71080 Poptr1|564592,Poptr1|566521  
AT5G38050 Poptr1|555923  
AT4G14570 Poptr1|657231  
AT5G18070 Poptr1|589964  
AT3G60230 Poptr1|644265,Poptr1|677642  
Poptr1|108722,Poptr1|108698  
AT3G23810,AT4G13940 Poptr1|597072,Poptr1|549785  
Poptr1|559854,Poptr1|642932,Poptr1|713329  
AT2G44690 Poptr1|689541  
AT2G17800,AT4G35950 Poptr1|585700,Poptr1|593818  
AT5G45970 Poptr1|705010  
AT4G35020  
AT1G75840,AT1G20090  
AT4G28950 Poptr1|597230,Poptr1|702137  
Poptr1|683158,Poptr1|672329  
AT5G62880,AT3G48040 Poptr1|687793,Poptr1|700910  
Poptr1|721702  
AT3G51300  
AT3G29185 Poptr1|556314,Poptr1|577693  
AT4G08980 Poptr1|692650  
AT3G06950 Poptr1|721191  
Poptr1|565473  
AT3G52250 Poptr1|655933,Poptr1|659846  
AT1G58210,AT1G09720 Poptr1|551665  
AT5G10500  
AT2G47920 Poptr1|572748,Poptr1|573510  
AT4G03153,AT1G03470  
AT2G22560 Poptr1|558947,Poptr1|563292  
Poptr1|729257  
Poptr1|548085,Poptr1|554704,Poptr1|651799  
AT3G01435 Poptr1|673632  
AT2G31930 Poptr1|98548,Poptr1|558140  
AT1G18660 Poptr1|569963  
Poptr1|575501  
AT4G11920,AT4G22910 Poptr1|691175,Poptr1|554287  
Poptr1|580103,Poptr1|575502,Poptr1|594403  
Poptr1|576487  
AT5G13840 Poptr1|698572,Poptr1|344984  
AT5G27080,AT5G26900,AT5G27570,AT5G27945  
AT4G33270,AT4G33260 Poptr1|738273,Poptr1|571123,Poptr1|583718  
AT2G28600 Poptr1|567732  
AT3G07480 Poptr1|682939  
AT5G13390 Poptr1|48606,Poptr1|554672  
AT1G64960 Poptr1|553972  
Poptr1|735695  
AT2G37970  
AT4G16440 Poptr1|57845,Poptr1|344022  
AT5G40680,AT3G27150 Poptr1|597156,Poptr1|64944  
Poptr1|58931  
AT1G74510 Poptr1|97421  
AT1G14330,AT2G02870,AT1G26930  
AT5G60570 Poptr1|587336,Poptr1|696710  
AT1G69520  
AT1G69523,AT1G69526  
AT3G08980 Poptr1|735791  
Poptr1|694370,Poptr1|562821  
AT1G23465  
AT1G53530 Poptr1|642413,Poptr1|707831  
Poptr1|583168,Poptr1|100040  
AT4G31370,AT2G24450  
AT4G12730  
AT5G55730 Poptr1|55851,Poptr1|684039  
AT2G45470,AT3G60900 Poptr1|730907  
AT3G46550 Poptr1|578652,Poptr1|561415  
AT3G12660 Poptr1|547729  
Poptr1|560208  
Poptr1|103654  
AT4G24975 Poptr1|592881  
AT1G04645 Poptr1|593687,Poptr1|595642,Poptr1|584551,Poptr1|581314,Poptr1|584550,Poptr1|584561  
AT3G16960,AT3G16970,AT3G17080,AT4G16195,AT5G12070,AT5G12060  
AT3G57850,AT3G57840 Poptr1|575691  
AT2G43540 Poptr1|562190  
AT2G20950,AT4G38550  
AT4G38560,AT2G20960,AT5G11140 Poptr1|648804,Poptr1|697176  
AT3G53970,AT1G48530 Poptr1|576861  
AT5G62150 Poptr1|570510,Poptr1|575761,Poptr1|552104,Poptr1|57004  
AT3G52790 Poptr1|55629  
AT4G25433  
AT4G11580Poptr1|550273  
AT3G48880 Poptr1|346095  
AT1G74640 Poptr1|580802

AT2G44280,AT3G60070 Poptr1|54777,Poptr1|583307  
AT2G44410 Poptr1|672684,Poptr1|558151  
AT2G42030,AT3G58030 Poptr1|667490,Poptr1|576379,Poptr1|352237  
AT1G05590 Poptr1|583312,Poptr1|98555  
AT1G12710,AT1G63090 Poptr1|646561,Poptr1|709440  
AT3G61060 Poptr1|700187  
AT3G53000 Poptr1|59202  
AT5G52120 Poptr1|662379,Poptr1|575771  
AT3G15640,AT1G52710,AT1G80230 Poptr1|548614,Poptr1|712484  
AT1G02140 Poptr1|740188,Poptr1|551963  
Poptr1|75674,Poptr1|558478  
AT5G64440 Poptr1|691784  
Poptr1|346892  
AT3G58490 Poptr1|576416,Poptr1|695267  
AT3G43760 Poptr1|596541  
Poptr1|355671  
Poptr1|99085,Poptr1|100018,Poptr1|587780,Poptr1|588051  
Poptr1|584201  
Poptr1|579895  
Poptr1|558380  
AT4G13470 Poptr1|560036,Poptr1|594279  
Poptr1|577858,Poptr1|571569,Poptr1|597477,Poptr1|591409,Poptr1|588672,Poptr1|591410,Poptr1|58422  
0,Poptr1|595991,Poptr1|588496,Poptr1|588128,Poptr1|577857,Poptr1|587345  
Poptr1|101641,Poptr1|98785,Poptr1|103128,Poptr1|106280,Poptr1|588021,Poptr1|584219  
Poptr1|100383,Poptr1|98895  
AT5G59060 Poptr1|592547  
Poptr1|99385,Poptr1|103524,Poptr1|61320,Poptr1|588415,Poptr1|60514,Poptr1|584377,Poptr1|62650  
Poptr1|99112,Poptr1|573810,Poptr1|588305,Poptr1|584285,Poptr1|573823,Poptr1|98884,Poptr1|584394,P  
optr1|577860,Poptr1|585424,Poptr1|100549,Poptr1|106523,Poptr1|587149,Poptr1|98915,Poptr1|355696,Poptr1|59119  
7,Poptr1|100933,Poptr1|99635,Poptr1|591373,Poptr1|593714,Poptr1|596887,Poptr1|99075  
Poptr1|571724,Poptr1|587144,Poptr1|577850,Poptr1|571726,Poptr1|590260,Poptr1|568527  
Poptr1|65208  
AT1G43760  
AT5G28615 Poptr1|588223  
Poptr1|584767,Poptr1|571577,Poptr1|591397,Poptr1|583452,Poptr1|563405,Poptr1|106428,Poptr1|58476  
9,Poptr1|595350,Poptr1|583454,Poptr1|587332,Poptr1|588476,Poptr1|583389,Poptr1|106053,Poptr1|581158,Poptr1|5  
71579,Poptr1|571578,Poptr1|571580,Poptr1|571565,Poptr1|587104,Poptr1|106236,Poptr1|64826,Poptr1|105678,Pop  
r1|571574,Poptr1|109194,Poptr1|577874,Poptr1|583956,Poptr1|108503,Poptr1|101139,Poptr1|571570,Poptr1|101059,  
Poptr1|102128,Poptr1|99113,Poptr1|585822,Poptr1|593757,Poptr1|100560,Poptr1|100684,Poptr1|99622,Poptr1|99115  
,Poptr1|579236,Poptr1|100016,Poptr1|100017,Poptr1|99108  
Poptr1|573401,Poptr1|585272  
Poptr1|587487,Poptr1|580271,Poptr1|585228,Poptr1|587412,Poptr1|583734,Poptr1|584389,Poptr1|57159  
1,Poptr1|591254,Poptr1|588447,Poptr1|584066,Poptr1|588426,Poptr1|650572  
Poptr1|571718,Poptr1|571725,Poptr1|584388  
Poptr1|579642  
Poptr1|588545  
Poptr1|582653  
AT3G27590 Poptr1|573799  
Poptr1|351084,Poptr1|99658,Poptr1|563404,Poptr1|98913,Poptr1|100482,Poptr1|565443,Poptr1|584765,  
Poptr1|583453,Poptr1|99089,Poptr1|555161,Poptr1|569921,Poptr1|101212,Poptr1|584239,Poptr1|577867  
Poptr1|577868,Poptr1|355665  
Poptr1|56819,Poptr1|588540,Poptr1|577531,Poptr1|571237,Poptr1|553367,Poptr1|573808,Poptr1|100126,  
Poptr1|106278,Poptr1|570228,Poptr1|100393,Poptr1|61301,Poptr1|98914,Poptr1|107440,Poptr1|98775,Poptr1|61298,  
Poptr1|61408,Poptr1|587861,Poptr1|586144,Poptr1|588425,Poptr1|100321,Poptr1|583333,Poptr1|585225,Poptr1|585  
422,Poptr1|99496,Poptr1|99418,Poptr1|545542,Poptr1|580258,Poptr1|593924,Poptr1|574185,Poptr1|596496  
AT1G43570 Poptr1|584391  
Poptr1|587481,Poptr1|108950  
Poptr1|584830  
AT1G19030,AT5G13655,AT3G17200,AT5G41505,AT3G49280,AT2G15600,AT1G32390,AT1G47783,AT2G03540,AT4  
G11710,AT1G35570,AT4G05145,AT5G52065,AT2G40680,AT1G21330,AT1G62890,AT5G49090,AT1G54955,AT3G25  
727,AT2G02520,AT1G43730,AT4G04650,AT4G05095,AT5G18880,AT1G60720,AT1G33710,AT3G25720,AT4G10613  
Poptr1|588129,Poptr1|593347,Poptr1|587783,Poptr1|585271,Poptr1|584822,Poptr1|592546,Poptr1|58715  
0,Poptr1|584833,Poptr1|585429,Poptr1|573806,Poptr1|573496,Poptr1|588536,Poptr1|573819,Poptr1|586278,Poptr1|5  
90770,Poptr1|577870,Poptr1|585217,Poptr1|585130,Poptr1|577869,Poptr1|590826,Poptr1|584200,Poptr1|583949,Pop  
ptr1|584224,Poptr1|585229,Poptr1|587483,Poptr1|592154,Poptr1|586917,Poptr1|588477,Poptr1|573803,Poptr1|5715  
72,Poptr1|353090,Poptr1|99072,Poptr1|571586,Poptr1|586165,Poptr1|585270,Poptr1|98801,Poptr1|591158,Poptr1|99  
573821,Poptr1|587749  
Poptr1|591095,Poptr1|571582,Poptr1|101642,Poptr1|592472,Poptr1|355663,Poptr1|588200,Poptr1|55729  
7,Poptr1|550693  
AT1G34440 Poptr1|580259  
Poptr1|351396,Poptr1|588132,Poptr1|343901,Poptr1|590534,Poptr1|98799,Poptr1|597385,Poptr1|348196,  
Poptr1|587781,Poptr1|100403,Poptr1|588041  
Poptr1|98773  
Poptr1|103862  
Poptr1|99423,Poptr1|588006,Poptr1|595634,Poptr1|571723,Poptr1|571571,Poptr1|98907,Poptr1|590827,  
Poptr1|585264  
Poptr1|101203,Poptr1|573817,Poptr1|573807,Poptr1|588308,Poptr1|590259,Poptr1|580269,Poptr1|59320  
4,Poptr1|573813,Poptr1|100014,Poptr1|592157,Poptr1|591157,Poptr1|588010,Poptr1|558379,Poptr1|583593,Poptr1|5  
71568,Poptr1|592152,Poptr1|107779,Poptr1|101660,Poptr1|577862,Poptr1|594172,Poptr1|596187,Poptr1|586920,Pop  
ptr1|581437,Poptr1|586706,Poptr1|597573,Poptr1|588424,Poptr1|584392,Poptr1|585417,Poptr1|586284,Poptr1|1070  
47,Poptr1|355660,Poptr1|99072,Poptr1|571586,Poptr1|586165,Poptr1|585270,Poptr1|98801,Poptr1|591158,Poptr1|99  
092,Poptr1|99501,Poptr1|100021,Poptr1|585178,Poptr1|355677,Poptr1|589009,Poptr1|571573,Poptr1|587127,Poptr1|

590892,Poptr1|355695,Poptr1|588418,Poptr1|583959,Poptr1|588492,Poptr1|591198,Poptr1|355659,Poptr1|669975,Poptr1|582440,Poptr1|681681,Poptr1|583736,Poptr1|586915,Poptr1|588198,Poptr1|588671,Poptr1|573497,Poptr1|584819,Poptr1|582354,Poptr1|585978,Poptr1|585419,Poptr1|588538,Poptr1|588546  
Poptr1|587226,Poptr1|583331,Poptr1|100270  
Poptr1|590858,Poptr1|588197,Poptr1|101662,Poptr1|108685,Poptr1|591159,Poptr1|583456,Poptr1|63578  
Poptr1|99618  
AT2G07760,AT5G28823,AT5G32613  
Poptr1|568498,Poptr1|580225,Poptr1|585263,Poptr1|582626,Poptr1|99090,Poptr1|592155,Poptr1|590890,  
Poptr1|580226,Poptr1|580268,Poptr1|99651,Poptr1|585409,Poptr1|571567,Poptr1|573495,Poptr1|101111,Poptr1|5869  
16,Poptr1|588674,Poptr1|558381,Poptr1|584374,Poptr1|590884,Poptr1|100561,Poptr1|107423,Poptr1|100893,Poptr1|  
582353,Poptr1|588130,Poptr1|588534,Poptr1|100811,Poptr1|106805,Poptr1|99495,Poptr1|99518,Poptr1|593008,Poptr1|101103  
Poptr1|581639  
Poptr1|584050  
AT5G16486 Poptr1|106004  
Poptr1|100125,Poptr1|596164,Poptr1|99383,Poptr1|353091,Poptr1|353087,Poptr1|583458,Poptr1|581574,  
Poptr1|62649,Poptr1|66017,Poptr1|108509,Poptr1|582195,Poptr1|351081,Poptr1|97967,Poptr1|350159,Poptr1|59756  
5,Poptr1|581186,Poptr1|587100,Poptr1|573289,Poptr1|573287  
AT5G46120 Poptr1|99067  
Poptr1|587782,Poptr1|105813  
Poptr1|583455,Poptr1|591398,Poptr1|583457  
Poptr1|587829,Poptr1|588675  
Poptr1|587257  
Poptr1|584827,Poptr1|590886,Poptr1|584931,Poptr1|573800,Poptr1|577873  
AT1G67930 Poptr1|714877,Poptr1|551234  
AT1G09280 Poptr1|570699,Poptr1|581675  
AT4G35570,AT2G17560  
Poptr1|716168  
AT1G20693,AT1G20696 Poptr1|652229,Poptr1|642802  
Poptr1|655598  
AT5G05330  
AT2G34450 Poptr1|556249  
AT5G23405,AT5G23420  
AT3G51880 Poptr1|656232,Poptr1|567282  
Poptr1|597492,Poptr1|675967,Poptr1|567551,Poptr1|563786  
AT3G09680,AT5G02960  
Poptr1|347439  
AT4G33590,AT4G33600 Poptr1|75552,Poptr1|577350  
Poptr1|682000,Poptr1|685381,Poptr1|658419  
AT5G63070  
Poptr1|657251  
AT1G33850,AT5G43640,AT5G09500,AT5G09490,AT1G04270,AT5G09510  
Poptr1|554329,Poptr1|571056  
Poptr1|595401  
AT2G30410 Poptr1|571333  
AT5G43310 Poptr1|697873,Poptr1|354590  
AT5G13940 Poptr1|348913  
AT3G19340 Poptr1|700517,Poptr1|343128  
Poptr1|55024  
AT4G10250 Poptr1|730463  
Poptr1|558085  
AT3G46230,AT1G53540,AT5G59720  
Poptr1|563962,Poptr1|579131,Poptr1|659595,Poptr1|549183,Poptr1|653054  
AT4G21870 Poptr1|567998  
AT5G12030,AT5G12020  
Poptr1|561615  
AT4G27670 Poptr1|574673,Poptr1|569622  
AT1G52560 Poptr1|548944  
AT1G59860,AT1G07400,AT2G29500  
Poptr1|574257,Poptr1|738813,Poptr1|703507,Poptr1|721480,Poptr1|679803,Poptr1|679801,Poptr1|10492  
4,Poptr1|723185,Poptr1|650093,Poptr1|722968,Poptr1|705954,Poptr1|592276  
Poptr1|555341  
Poptr1|659379  
AT5G37670 Poptr1|645208  
AT1G54050 Poptr1|584147,Poptr1|553809  
Poptr1|351844  
AT2G19310 Poptr1|652851,Poptr1|669821  
Poptr1|549610  
Poptr1|558332  
AT1G53940,AT5G40990,AT1G53990,AT3G14225  
AT1G20130,AT1G20120  
AT5G45960 Poptr1|586077,Poptr1|586078  
AT5G42160  
Poptr1|577803  
AT2G40250  
AT4G10950 Poptr1|591231,Poptr1|554504  
AT4G16230  
AT5G22810 Poptr1|54308  
AT2G04570 Poptr1|573029  
Poptr1|648717  
AT5G15720  
AT5G18430



Poptr1|546290,Poptr1|356807  
Poptr1|573030,Poptr1|552727  
Poptr1|596637,Poptr1|585589  
AT1G74460 Poptr1|355757  
Poptr1|584092,Poptr1|592403,Poptr1|581324,Poptr1|583414,Poptr1|568488,Poptr1|669991  
AT1G59406,AT1G59030,AT1G58725,AT3G43550,AT3G43570,AT1G58480,AT3G14820,AT5G42170  
AT2G04020 Poptr1|581173  
AT3G09930,AT5G03610 Poptr1|744673  
Poptr1|75354,Poptr1|705380  
Poptr1|345192  
AT5G55050 Poptr1|727976  
Poptr1|584678  
Poptr1|641971,Poptr1|591570  
AT5G41890  
Poptr1|354020,Poptr1|581775  
AT1G54010,AT1G54000,AT1G54020,AT3G14210,AT3G14220,AT1G54030  
AT1G29660,AT1G29670 Poptr1|545109,Poptr1|568486  
Poptr1|579105,Poptr1|545500  
Poptr1|588528,Poptr1|581149  
Poptr1|586602  
AT5G37690 Poptr1|555973,Poptr1|348780  
AT2G23540 Poptr1|563046  
Poptr1|580293,Poptr1|640949  
AT4G28780 Poptr1|553265  
Poptr1|586261,Poptr1|595212,Poptr1|590925,Poptr1|587165,Poptr1|579255  
AT3G04290,AT5G33370 Poptr1|571136,Poptr1|738312,Poptr1|738313,Poptr1|573773,Poptr1|738296  
AT1G71250 Poptr1|581024  
AT2G42990 Poptr1|52074  
AT2G03980 Poptr1|584635,Poptr1|583881  
Poptr1|577804  
Poptr1|595982,Poptr1|552926,Poptr1|656881  
AT4G16220 Poptr1|580498  
AT5G03600  
AT4G26790  
AT3G16370 Poptr1|691304  
AT2G19050,AT2G19060,AT4G30140,AT2G19010  
Poptr1|670376,Poptr1|674239,Poptr1|673117,Poptr1|585951,Poptr1|107294,Poptr1|594193,Poptr1|70533  
7,Poptr1|582265,Poptr1|593152,Poptr1|674605,Poptr1|578377,Poptr1|727904,Poptr1|345851,Poptr1|727893,Poptr1|5  
84093,Poptr1|747939,Poptr1|353120,Poptr1|704069,Poptr1|670630,Poptr1|587335,Poptr1|591620,Poptr1|669407,Pop  
ptr1|747278,Poptr1|578556,Poptr1|570488,Poptr1|555268  
AT3G50400  
AT1G53920 Poptr1|349679  
AT1G06990  
Poptr1|581772  
AT1G71120  
AT3G53100  
AT5G45950 Poptr1|713889  
AT1G71691 Poptr1|574209,Poptr1|740794  
AT5G45670,AT4G18970  
Poptr1|597293,Poptr1|640950,Poptr1|561016  
AT1G33811Poptr1|592340  
AT5G08460  
AT2G31550,AT2G31540,AT1G58430,AT2G30220,AT2G30310,AT2G24560 Poptr1|353753,Poptr1|56886  
Poptr1|656882  
Poptr1|670197,Poptr1|107228,Poptr1|545497,Poptr1|699914,Poptr1|349678,Poptr1|348741,Poptr1|55290  
4,Poptr1|348738,Poptr1|692161  
Poptr1|577467  
AT1G23500,AT1G73610,AT5G63170,AT1G75920,AT1G75910,AT1G75930  
AT1G75900 Poptr1|550852,Poptr1|694866  
AT5G03810,AT5G03820 Poptr1|589543  
AT1G75880,AT1G75890  
AT5G03770 Poptr1|576764  
AT4G31115  
AT5G04440 Poptr1|725124  
Poptr1|675706,Poptr1|578516,Poptr1|669360  
AT2G44970 Poptr1|591707  
Poptr1|108754  
AT2G30280  
AT5G62240 Poptr1|356344  
AT4G11990,AT4G22860 Poptr1|646516,Poptr1|63648  
AT1G69180  
AT2G26580 Poptr1|736552,Poptr1|652803  
Poptr1|747046  
Poptr1|640733  
AT1G23420 Poptr1|354801,Poptr1|566056  
AT4G00180 Poptr1|644314,Poptr1|663774,Poptr1|671215,Poptr1|646464  
Poptr1|353953  
AT2G45190  
Poptr1|701436  
AT3G47120  
Poptr1|723082  
AT3G20680 Poptr1|571472

AT1G31330 Poptr1|712735,Poptr1|548236  
Poptr1|580901  
AT5G22620 Poptr1|703510  
AT1G29890,AT2G34410  
AT5G46340 Poptr1|674771,Poptr1|641544,Poptr1|698937  
AT3G06547  
AT3G06550 Poptr1|353999,Poptr1|698332  
AT2G45950,AT3G61415 Poptr1|347983,Poptr1|57031  
Poptr1|570432,Poptr1|575844  
AT3G66652  
AT5G58040 Poptr1|695231,Poptr1|578771  
AT5G44070,AT1G03980 Poptr1|573410  
Poptr1|553337,Poptr1|553336  
AT3G12970,AT1G56020  
AT1G79060 Poptr1|71861,Poptr1|562889  
AT5G59950  
Poptr1|558100,Poptr1|691416  
AT5G02530 Poptr1|100817  
Poptr1|705175,Poptr1|567453,Poptr1|563873  
Poptr1|55614  
AT1G66260,AT5G37720 Poptr1|692145,Poptr1|714162  
Poptr1|675990  
AT2G42760 Poptr1|568678,Poptr1|555648  
AT5G12440 Poptr1|655269,Poptr1|678874,Poptr1|64637,Poptr1|64224,Poptr1|557879  
AT3G63450,AT3G51950 Poptr1|647251,Poptr1|675178  
AT3G21100,AT1G51520,AT1G51530  
Poptr1|64223,Poptr1|722961  
AT2G25570 Poptr1|64203  
AT1G49910,AT3G19590 Poptr1|684006,Poptr1|54545  
Poptr1|708612  
AT1G69400 Poptr1|564263,Poptr1|566973  
Poptr1|584636  
AT1G80670  
AT1G15850 Poptr1|693217  
AT5G55140 Poptr1|664781,Poptr1|552748,Poptr1|566134  
Poptr1|564927  
AT1G80460 Poptr1|59582  
Poptr1|587915  
Poptr1|572716  
AT4G15802 Poptr1|745899,Poptr1|697856  
Poptr1|597186  
AT5G58070 Poptr1|738040  
AT3G62340  
Poptr1|348021  
AT4G39410 Poptr1|686013,Poptr1|716011  
AT2G44745 Poptr1|591760,Poptr1|711034  
AT2G25000,AT4G31800  
AT1G64000,AT5G41570  
AT5G07100  
AT5G26170 Poptr1|716910  
AT2G47260 Poptr1|664330,Poptr1|692253  
AT4G01250 Poptr1|688168,Poptr1|348016  
AT5G24110  
Poptr1|57054  
AT1G30650,AT2G34830,AT5G45270 Poptr1|550564  
AT5G52830 Poptr1|556119  
AT2G46400  
Poptr1|574062,Poptr1|596971  
AT1G55600  
AT3G56390 Poptr1|574063  
AT4G23550 Poptr1|646672,Poptr1|640436  
Poptr1|344767,Poptr1|669155  
AT2G37260 Poptr1|589375  
AT3G01970  
AT5G13080 Poptr1|597140,Poptr1|64975,Poptr1|712451,Poptr1|640058  
Poptr1|353019  
AT4G24240 Poptr1|684417,Poptr1|703142  
AT3G01080  
AT5G49520 Poptr1|696640,Poptr1|698327  
AT2G30250  
AT1G80840 Poptr1|587210,Poptr1|693208  
AT3G56400,AT2G40750 Poptr1|560994,Poptr1|701688,Poptr1|571679  
AT2G24570,AT4G31550  
AT4G26640 Poptr1|550164,Poptr1|727942  
AT2G38470  
Poptr1|685229,Poptr1|655096  
AT5G64810 Poptr1|75851,Poptr1|75852,Poptr1|71737  
Poptr1|545872,Poptr1|590547,Poptr1|577692  
Poptr1|552691,Poptr1|573073  
AT2G40740  
AT1G68150  
Poptr1|576808,Poptr1|560775

Poptr1|350076,Poptr1|581238  
AT2G04880  
Poptr1|571865,Poptr1|665964  
AT2G23320  
Poptr1|577093,Poptr1|560961  
Poptr1|555180  
AT3G04670,AT5G28650  
AT3G32090  
AT4G30935 Poptr1|578746  
AT1G66600,AT1G66560,AT1G66550,AT1G80590,AT5G22570,AT5G01900  
AT2G30590 Poptr1|685380,Poptr1|692880,Poptr1|689825,Poptr1|571055  
AT2G46130  
AT1G69310 Poptr1|656500,Poptr1|566947  
AT1G29280 Poptr1|693984  
Poptr1|669811,Poptr1|695494  
AT4G26440,AT5G56270 Poptr1|691986,Poptr1|744845  
AT1G29860 Poptr1|674772,Poptr1|594801,Poptr1|72693,Poptr1|692798  
AT5G46350,AT4G18170  
AT2G21900  
AT4G11070,AT4G23810  
AT2G03340,AT1G13960 Poptr1|345136,Poptr1|687255  
AT5G43290  
AT3G58710  
Poptr1|710456,Poptr1|572606  
Poptr1|662175,Poptr1|575385  
AT5G43400,AT5G43390  
AT3G24780,AT5G13210  
Poptr1|667059  
Poptr1|557484  
Poptr1|554714,Poptr1|350563  
Poptr1|548074  
AT5G05730,AT3G55870 Poptr1|563999  
AT2G28880  
Poptr1|579106,Poptr1|64279  
AT2G29690 Poptr1|686859  
Poptr1|107701  
Poptr1|342975  
AT1G68190 Poptr1|564570  
AT5G48250,AT3G07650 Poptr1|732506  
AT2G33500,AT1G28050 Poptr1|350573,Poptr1|63183  
AT1G05290  
AT4G15250,AT3G21880 Poptr1|75477  
AT2G47890 Poptr1|573506  
AT2G32310  
Poptr1|569981,Poptr1|664918  
Poptr1|65015  
AT1G60250  
AT1G04510,AT2G33340 Poptr1|565819,Poptr1|696354  
AT1G17870 Poptr1|642120,Poptr1|642119  
AT5G17250 Poptr1|349509  
AT2G18040 Poptr1|696157  
Poptr1|589139,Poptr1|107114  
Poptr1|670385,Poptr1|579908,Poptr1|108773  
AT5G35360 Poptr1|695467,Poptr1|673504  
AT1G03090 Poptr1|559591  
AT3G61390,AT2G45920 Poptr1|705100  
AT1G29340 Poptr1|660726,Poptr1|546412  
AT1G71020,AT1G23030 Poptr1|658791,Poptr1|354238  
AT3G54850 Poptr1|563705,Poptr1|567650  
AT3G46510 Poptr1|64402,Poptr1|723298  
AT4G21350 Poptr1|555437,Poptr1|546367,Poptr1|568369  
Poptr1|572264  
AT5G64660,AT5G09800,AT3G18710 Poptr1|53121,Poptr1|75563  
AT2G25130,AT4G31890 Poptr1|685501  
AT5G65920,AT3G49810 Poptr1|342567,Poptr1|60820,Poptr1|644013  
AT1G08315 Poptr1|555059,Poptr1|62889  
AT4G12710 Poptr1|573125  
AT1G01670  
AT5G18340,AT5G18320,AT5G18330  
AT3G19380,AT1G49780 Poptr1|581523,Poptr1|582191,Poptr1|557402  
AT5G40140  
AT5G67340  
Poptr1|559352,Poptr1|551342  
AT4G16490  
AT1G01680  
AT2G23140 Poptr1|72070,Poptr1|100377  
AT3G03440 Poptr1|714135,Poptr1|645254  
AT3G07360 Poptr1|571146,Poptr1|101775,Poptr1|591243,Poptr1|571147,Poptr1|99745,Poptr1|710348  
AT1G15165  
Poptr1|564063  
AT1G24330,AT1G67530 Poptr1|697928,Poptr1|354673  
AT5G01830 Poptr1|577153,Poptr1|560979

Poptr1|726900  
AT3G20170  
AT1G10560,AT1G60190 Poptr1|355869,Poptr1|672873,Poptr1|666450  
AT1G27910  
AT2G28830  
AT5G42340 Poptr1|59883,Poptr1|556783,Poptr1|346578  
Poptr1|559839  
AT4G36550  
AT5G14510 Poptr1|64810  
AT3G47820,AT5G62560  
Poptr1|53385,Poptr1|593926,Poptr1|72918  
AT3G54790 Poptr1|52149,Poptr1|342237  
AT5G58680,AT3G01400 Poptr1|730776,Poptr1|551785  
AT5G65200 Poptr1|570047,Poptr1|575109  
Poptr1|594750  
Poptr1|561864  
Poptr1|726903  
AT1G01660  
Poptr1|717391  
Poptr1|53140,Poptr1|558420  
AT3G49160 Poptr1|569507  
AT5G60700 Poptr1|54825,Poptr1|595071  
AT1G05055 Poptr1|690456  
Poptr1|581727,Poptr1|596592  
Poptr1|641718  
AT3G27325 Poptr1|549619,Poptr1|549620  
AT3G52740  
AT3G44450 Poptr1|741806,Poptr1|556801,Poptr1|594977  
AT2G04235 Poptr1|65083  
AT1G80700,AT1G80980 Poptr1|554865,Poptr1|63042,Poptr1|554864  
AT2G44750,AT1G02880 Poptr1|572707,Poptr1|684287  
AT2G30720 Poptr1|688889  
AT5G48370 Poptr1|553137  
Poptr1|579663,Poptr1|675790  
AT4G38020 Poptr1|72120  
AT5G14700 Poptr1|64756  
AT2G33600,AT2G33590 Poptr1|560013,Poptr1|710667,Poptr1|346522  
Poptr1|587227  
Poptr1|710036  
AT1G80820,AT1G15950  
Poptr1|587221,Poptr1|596618,Poptr1|690896,Poptr1|547924,Poptr1|587228,Poptr1|587225,Poptr1|58721  
4,Poptr1|705113,Poptr1|100445,Poptr1|647165,Poptr1|63022,Poptr1|676233  
AT5G58490 Poptr1|722576  
Poptr1|581821  
Poptr1|683658,Poptr1|712228  
AT2G45400  
Poptr1|675667,Poptr1|695419,Poptr1|552050,Poptr1|583803,Poptr1|552046,Poptr1|552049,Poptr1|58883  
9,Poptr1|583802,Poptr1|593100,Poptr1|552043,Poptr1|552044,Poptr1|552048,Poptr1|709899,Poptr1|347860  
Poptr1|556164,Poptr1|743671  
AT2G02400 Poptr1|689917  
Poptr1|587284,Poptr1|557813,Poptr1|682511,Poptr1|686826  
AT4G35420 Poptr1|354333  
AT5G19440  
Poptr1|557814  
Poptr1|590025,Poptr1|349902,Poptr1|730243  
AT2G23910,AT4G30470 Poptr1|344512,Poptr1|702210  
AT5G42800 Poptr1|710079,Poptr1|72935  
Poptr1|571084  
AT1G76470 Poptr1|346533  
Poptr1|672094  
AT4G27250  
AT1G61720 Poptr1|687506,Poptr1|694045  
AT1G25460,AT1G68540 Poptr1|698243,Poptr1|345258  
AT1G09500,AT1G09510,AT1G09490,AT1G09480,AT1G66800  
AT1G51410 Poptr1|705504,Poptr1|641271,Poptr1|557864  
AT1G67620 Poptr1|566833,Poptr1|696630  
AT3G56990 Poptr1|560377,Poptr1|576176  
AT4G32750 Poptr1|561777,Poptr1|578102  
AT1G80510 Poptr1|592680,Poptr1|592681,Poptr1|48870  
AT3G30390,AT5G38820 Poptr1|552755,Poptr1|584645,Poptr1|690077  
Poptr1|564098,Poptr1|568853  
AT2G40420,AT3G56200 Poptr1|698462  
Poptr1|579099,Poptr1|342561  
AT1G11520  
Poptr1|55761,Poptr1|545048  
AT4G21660  
AT1G09910 Poptr1|716387  
Poptr1|352579  
AT4G24430  
Poptr1|551701,Poptr1|551702  
AT1G09880 Poptr1|551700  
AT1G65210,AT4G38030

Poptr1|558976,Poptr1|551699  
AT2G22620,AT4G37950 Poptr1|730697,Poptr1|352580  
AT1G09890  
Poptr1|588571,Poptr1|568044  
Poptr1|701174,Poptr1|570484  
AT5G52230  
AT5G63540 Poptr1|575395  
AT3G63410 Poptr1|559613,Poptr1|551117,Poptr1|696389  
AT4G27910,AT5G53430 Poptr1|574760,Poptr1|569541  
AT5G42400  
Poptr1|550697  
AT3G61740 Poptr1|348075,Poptr1|572391  
AT1G77290 Poptr1|685303  
AT2G37680 Poptr1|586100,Poptr1|576816  
AT1G27300 Poptr1|554770,Poptr1|548037  
AT2G24120 Poptr1|352371,Poptr1|578710  
Poptr1|345225  
Poptr1|580715  
AT1G68990  
AT5G15700  
Poptr1|103412,Poptr1|102823,Poptr1|97026,Poptr1|101039,Poptr1|597018,Poptr1|587440,Poptr1|593369,  
Poptr1|100518,Poptr1|593565,Poptr1|583254,Poptr1|746128,Poptr1|100517,Poptr1|595704,Poptr1|100509,Poptr1|58  
3900,Poptr1|97027,Poptr1|579527,Poptr1|100523,Poptr1|101047  
AT5G44005 Poptr1|573358,Poptr1|553318  
AT3G24255,AT3G23910 Poptr1|65067  
AT1G72010 Poptr1|59007,Poptr1|678125  
AT3G27010 Poptr1|549725,Poptr1|742842  
AT2G37000 Poptr1|650493  
AT1G58100  
AT5G51910 Poptr1|570503  
AT3G47620 Poptr1|647955,Poptr1|580925  
AT5G08330 Poptr1|654962,Poptr1|558669  
AT5G41030  
AT1G69690  
Poptr1|63164,Poptr1|554743  
AT1G35560  
AT2G45680 Poptr1|644380  
Poptr1|554293,Poptr1|548532  
AT3G45150  
Poptr1|589460,Poptr1|584277  
AT5G23280  
AT2G22890,AT1G62190,AT4G27030 Poptr1|569119,Poptr1|700014  
AT2G04790  
Poptr1|573058  
AT5G09310 Poptr1|718591,Poptr1|650600  
AT1G18810  
AT1G14280,AT2G02950 Poptr1|581372  
AT1G16540 Poptr1|719124  
AT1G20030,AT1G75800 Poptr1|710655  
AT4G36000 Poptr1|741173  
Poptr1|747341,Poptr1|548498,Poptr1|669475  
AT2G17860,AT4G36010 Poptr1|679124  
Poptr1|583391,Poptr1|585256,Poptr1|583370,Poptr1|677337,Poptr1|583374,Poptr1|672756,Poptr1|58338  
5,Poptr1|679347,Poptr1|672749,Poptr1|357147,Poptr1|583379,Poptr1|357135,Poptr1|591098,Poptr1|594106,Poptr1|6  
41021  
AT4G38670 Poptr1|697200  
AT2G28790 Poptr1|697660,Poptr1|706190  
Poptr1|48850,Poptr1|680516,Poptr1|553438  
AT1G77700 Poptr1|643657,Poptr1|673336,Poptr1|559199  
Poptr1|559846  
AT1G75050,AT1G75030,AT1G75040 Poptr1|591837  
AT1G73620,AT1G18250 Poptr1|699521,Poptr1|47709  
Poptr1|550868  
AT5G02140 Poptr1|653007  
AT2G24810,AT1G19320  
AT4G24180 Poptr1|52227,Poptr1|550867  
Poptr1|551916  
AT4G38660 Poptr1|721766,Poptr1|713269  
Poptr1|548497  
AT5G40020 Poptr1|668489  
AT5G38280 Poptr1|546340,Poptr1|106192,Poptr1|106770,Poptr1|555314,Poptr1|579656  
AT5G24620 Poptr1|345783,Poptr1|57434  
AT4G11650Poptr1|709407,Poptr1|548446  
AT5G66680  
Poptr1|556496,Poptr1|584054,Poptr1|571850,Poptr1|593259,Poptr1|573517,Poptr1|557286,Poptr1|70343  
0,Poptr1|655250  
AT5G41190Poptr1|693448  
AT5G16100 Poptr1|352626  
AT5G54430,AT4G27320 Poptr1|60635,Poptr1|568987  
Poptr1|702640,Poptr1|571831  
AT1G11360Poptr1|568329  
Poptr1|570097

AT3G27860 Poptr1|556245  
AT3G09670 Poptr1|576648  
AT3G54760 Poptr1|567549,Poptr1|353438  
AT5G02950 Poptr1|570096  
Poptr1|571943,Poptr1|665894  
AT5G51340 Poptr1|665895  
AT2G15270 Poptr1|549947  
AT3G08640,AT3G08630 Poptr1|589613  
AT3G30725  
AT5G38770  
AT4G25760,AT5G57685 Poptr1|585147  
AT5G24920 Poptr1|580727  
AT2G24762,AT4G31730 Poptr1|106883,Poptr1|562029,Poptr1|669220  
Poptr1|580730,Poptr1|545700,Poptr1|545703,Poptr1|670814,Poptr1|580728,Poptr1|545702  
AT3G01150Poptr1|545895,Poptr1|58394  
Poptr1|661468,Poptr1|700810  
AT5G53180  
AT1G16820,AT1G78900 Poptr1|698731,Poptr1|655642  
AT1G28120 Poptr1|640108,Poptr1|646966  
AT1G48160 Poptr1|728715,Poptr1|733120  
AT4G34700 Poptr1|648697,Poptr1|649314  
AT1G58370 Poptr1|710260  
AT1G10050  
AT4G08160  
AT4G11790Poptr1|350161,Poptr1|63611  
Poptr1|544704,Poptr1|545217  
AT5G45940 Poptr1|577020  
AT2G33980,AT1G28960 Poptr1|545218,Poptr1|55909  
AT5G06000 Poptr1|567623  
AT3G11400Poptr1|563940,Poptr1|724626  
AT5G19540 Poptr1|578466  
Poptr1|584013  
Poptr1|641762  
AT3G01780 Poptr1|549660,Poptr1|641761  
AT4G21570,AT1G11200 Poptr1|682694,Poptr1|545020,Poptr1|97913  
AT5G52160  
AT5G07230,AT5G62080 Poptr1|662373,Poptr1|57799,Poptr1|575778  
AT3G18060 Poptr1|688446,Poptr1|569761  
AT2G01330  
AT1G32300,AT5G56490,AT5G56470,AT2G46750,AT2G46740,AT2G46760 Poptr1|342841,Poptr1|342840  
AT5G11540 Poptr1|580640,Poptr1|597452,Poptr1|681547,Poptr1|355123,Poptr1|661364,Poptr1|675390,Poptr1|58064  
2,Poptr1|569391  
AT2G21240,AT4G38910 Poptr1|721839,Poptr1|546149  
AT2G21237  
AT2G35550 Poptr1|349956,Poptr1|590087  
AT1G14685,AT2G01930,AT1G68120 Poptr1|726756,Poptr1|564713  
AT5G42520 Poptr1|715376,Poptr1|550928  
AT1G27420,AT1G67480 Poptr1|658140,Poptr1|565042,Poptr1|592319  
AT1G61350 Poptr1|555490,Poptr1|660453  
AT2G45720 Poptr1|644388,Poptr1|572180  
AT2G05810 Poptr1|343013,Poptr1|573013  
AT5G50900 Poptr1|575431,Poptr1|570325  
AT1G01830  
AT2G21280 Poptr1|697230  
Poptr1|107638  
AT3G20620 Poptr1|584254,Poptr1|581765,Poptr1|97655,Poptr1|107882,Poptr1|97663,Poptr1|104002,Poptr1|579435  
Poptr1|65853  
Poptr1|562218,Poptr1|590131,Poptr1|579434,Poptr1|579428,Poptr1|569113,Poptr1|99378,Poptr1|356758,  
Poptr1|548689,Poptr1|548688,Poptr1|568920,Poptr1|75920  
Poptr1|575603  
Poptr1|353047,Poptr1|737413,Poptr1|717865  
Poptr1|547964,Poptr1|690911  
Poptr1|570755  
Poptr1|578313  
AT1G56240,AT1G56250,AT1G09155 Poptr1|97793,Poptr1|103459,Poptr1|570754  
AT2G02280 Poptr1|581917  
AT2G02300,AT2G02310,AT2G02240,AT2G02250,AT2G02320,AT2G02340,AT2G02360,AT2G02350,AT2G02230  
AT1G80110  
AT5G24560  
AT1G55670 Poptr1|744852,Poptr1|550669  
AT1G43190 Poptr1|342353,Poptr1|694636  
AT2G22650 Poptr1|578795  
AT5G42330 Poptr1|693024,Poptr1|652202  
AT2G43990 Poptr1|562084,Poptr1|99543  
AT2G43160,AT3G59290 Poptr1|552810,Poptr1|57288  
Poptr1|577895

AT5G11710Poptr1|685545  
AT1G30135,AT2G34600 Poptr1|560260,Poptr1|568407  
AT4G01710 Poptr1|684388,Poptr1|703056  
AT1G10220,AT1G59590 Poptr1|572033,Poptr1|644030  
Poptr1|580763,Poptr1|553683,Poptr1|683724  
AT1G80360 Poptr1|553682  
AT5G56940 Poptr1|704840  
AT4G34620 Poptr1|574430,Poptr1|574428,Poptr1|590930,Poptr1|580421,Poptr1|574426,Poptr1|582738  
AT3G61080 Poptr1|347914  
AT2G22240,AT4G39800,AT5G10170 Poptr1|562631,Poptr1|685176  
AT4G21770 Poptr1|555355  
AT2G41950 Poptr1|717730  
AT3G44370  
AT3G44360,AT1G65080 Poptr1|557194,Poptr1|681255  
AT1G05620 Poptr1|654333  
AT2G36310 Poptr1|717449  
AT5G65000 Poptr1|695885,Poptr1|694311  
AT4G39970 Poptr1|718749  
AT3G48420 Poptr1|571958,Poptr1|700980  
AT3G63420 Poptr1|346925  
AT3G22942 Poptr1|667013  
Poptr1|551433  
AT1G09920 Poptr1|643928  
Poptr1|104237  
Poptr1|345462,Poptr1|565801  
Poptr1|565804  
Poptr1|565805,Poptr1|565806,Poptr1|595189,Poptr1|565803  
AT3G23480,AT3G23470,AT3G23510,AT3G23530,AT3G23460  
Poptr1|565802  
Poptr1|585732  
Poptr1|586088,Poptr1|582877  
AT5G24165  
Poptr1|661499,Poptr1|680058,Poptr1|666160  
AT4G23885 Poptr1|646753  
AT3G17460,AT1G09520 Poptr1|565467,Poptr1|354995  
Poptr1|575760  
AT5G51970 Poptr1|728768  
Poptr1|570511  
AT1G66000,AT1G66060,AT2G03010,AT4G16530,AT5G37420,AT5G37430,AT5G37920,AT5G37410,AT4G09440,AT5  
G37470,AT5G37460,AT5G37400,AT5G37650,AT1G66110  
Poptr1|581255  
AT5G37660 Poptr1|552939,Poptr1|555981  
AT2G01660 Poptr1|656963,Poptr1|726827  
AT1G70690 Poptr1|552026,Poptr1|572080,Poptr1|349844  
AT1G61620 Poptr1|544927,Poptr1|588334,Poptr1|568327  
Poptr1|584566  
AT4G10310 Poptr1|669794  
AT4G13200  
Poptr1|645399  
AT5G12260 Poptr1|100756,Poptr1|557721,Poptr1|64604  
Poptr1|588282  
AT3G43340,AT2G39140 Poptr1|696967  
AT4G00355 Poptr1|552182,Poptr1|700227  
AT2G45980  
AT5G43745,AT5G02940 Poptr1|354542  
AT1G26120 Poptr1|698269  
AT3G02410,AT5G15860 Poptr1|693811,Poptr1|580759  
AT3G16270 Poptr1|705785  
AT2G32330,AT2G31580 Poptr1|552840  
AT2G32320  
AT5G39600 Poptr1|105935,Poptr1|356141,Poptr1|683300,Poptr1|570348  
Poptr1|578747  
AT4G18210,AT4G18220,AT4G18197,AT4G18205,AT4G18195 Poptr1|64723,Poptr1|641547  
AT4G18190  
Poptr1|590480,Poptr1|347409  
AT1G44750 Poptr1|591810  
AT5G41160,AT4G08700  
Poptr1|553184  
AT1G75470,AT1G19770,AT1G57990,AT1G57943,AT1G57980,AT1G09860,AT1G47603  
Poptr1|589957  
Poptr1|585404,Poptr1|577355  
AT2G33750,AT1G28230 Poptr1|51910  
AT1G28220  
AT1G30840 Poptr1|48625,Poptr1|554629  
AT2G24220 Poptr1|695220  
AT3G05250 Poptr1|595131,Poptr1|595585  
AT5G19485 Poptr1|691484  
Poptr1|560499,Poptr1|576358  
AT5G13710 Poptr1|582678,Poptr1|683852,Poptr1|722830  
AT1G52380,AT3G15970 Poptr1|693711,Poptr1|63774  
AT5G26800,AT3G05810 Poptr1|704365,Poptr1|662591  
AT3G15790

Poptr1|652802,Poptr1|578938  
 AT1G15340 Poptr1|592714  
 Poptr1|670374,Poptr1|65366,Poptr1|670227,Poptr1|661830,Poptr1|351648,Poptr1|65694,Poptr1|63823,Poptr1|544924  
 AT1G22770 Poptr1|551288,Poptr1|685335  
 AT5G23450 Poptr1|686575,Poptr1|725184  
 AT4G14160,AT3G23660,AT1G05520 Poptr1|579998,Poptr1|65169  
 AT2G21630 Poptr1|553121,Poptr1|700682  
 AT5G43670 Poptr1|354546,Poptr1|55093  
 AT3G48210 Poptr1|570153,Poptr1|575209  
 AT3G28455 Poptr1|701796,Poptr1|698004,Poptr1|696305  
 AT3G21290 Poptr1|703265  
 AT2G35630 Poptr1|550419  
 AT3G28155  
 Poptr1|642575,Poptr1|569209  
 Poptr1|105147  
 AT3G25190  
 AT1G21140,AT3G43630,AT3G43660,AT1G76800 Poptr1|559362,Poptr1|551331  
 AT3G29010 Poptr1|577664  
 AT1G04390 Poptr1|642586  
 AT1G58110Poptr1|553391,Poptr1|584476,Poptr1|645623  
 AT1G35490 Poptr1|575858  
 AT4G35250 Poptr1|697144,Poptr1|648859  
 Poptr1|595413,Poptr1|699843  
 AT1G08780  
 AT4G29070 Poptr1|691496  
 AT4G29530  
 Poptr1|736884  
 AT1G73010,AT1G17710 Poptr1|657610,Poptr1|678457  
 Poptr1|560266,Poptr1|106815  
 Poptr1|576040  
 AT4G14965  
 Poptr1|653923  
 Poptr1|73054,Poptr1|109255,Poptr1|678218  
 AT1G33680,AT4G10070 Poptr1|702518,Poptr1|678217  
 AT4G25280 Poptr1|570587,Poptr1|733991  
 AT3G60180  
 Poptr1|57118  
 AT5G26667 Poptr1|644205,Poptr1|591816  
 AT3G21150Poptr1|567790  
 AT4G21210  
 Poptr1|555376  
 AT3G01200  
 AT4G02660 Poptr1|643248  
 Poptr1|651821,Poptr1|651822  
 Poptr1|643247  
 AT1G03060 Poptr1|551123  
 Poptr1|651820,Poptr1|643249  
 AT1G77540,AT1G21770 Poptr1|716669  
 AT2G33630  
 Poptr1|705567,Poptr1|342094,Poptr1|560000  
 AT2G24960 Poptr1|353036  
 AT4G02210 Poptr1|552487  
 Poptr1|64605,Poptr1|559960,Poptr1|556617  
 Poptr1|570871,Poptr1|595581,Poptr1|570872  
 Poptr1|570870  
 AT5G05250,AT3G56360 Poptr1|738709  
 AT1G14860,AT2G01670 Poptr1|656969,Poptr1|566448  
 AT3G12600 Poptr1|555066,Poptr1|57924  
 AT3G26690,AT1G12880 Poptr1|63227,Poptr1|350526  
 AT1G18300,AT1G73540 Poptr1|569710,Poptr1|106824,Poptr1|661329,Poptr1|575041  
 Poptr1|648141,Poptr1|552937  
 AT3G18050 Poptr1|661700,Poptr1|574981  
 AT4G28100 Poptr1|739104,Poptr1|729171  
 AT1G02680 Poptr1|572633  
 AT1G22882,AT1G71360 Poptr1|584914,Poptr1|743872  
 AT4G23950 Poptr1|63409,Poptr1|554505  
 AT3G55250 Poptr1|102062,Poptr1|688921  
 AT5G05010 Poptr1|105642,Poptr1|701114,Poptr1|570607  
 Poptr1|108666  
 Poptr1|571648  
 AT2G40600  
 AT2G36305 Poptr1|652951  
 AT2G20500 Poptr1|551038,Poptr1|559694  
 AT2G47960 Poptr1|580877,Poptr1|545323  
 AT4G26520,AT4G26530 Poptr1|582569,Poptr1|550631  
 AT2G01140Poptr1|658829,Poptr1|656861  
 AT2G21330,AT4G38970 Poptr1|649324,Poptr1|713130,Poptr1|593043,Poptr1|53423  
 AT3G52930,AT2G36460,AT5G03690 Poptr1|580511,Poptr1|578574  
 AT3G11750,AT5G62980,AT3G21730 Poptr1|587503  
 Poptr1|667587  
 AT2G42160 Poptr1|578923



Poptr1|679104,Poptr1|719167  
AT2G27160,AT2G26000  
AT5G19950 Poptr1|578407  
Poptr1|578406  
AT5G14105 Poptr1|641832  
AT3G25950 Poptr1|565910,Poptr1|566335,Poptr1|345497  
AT3G27270  
AT4G00270  
AT5G14280 Poptr1|49194  
AT5G11080,AT5G25270 Poptr1|583635,Poptr1|578825  
AT5G42220 Poptr1|559910,Poptr1|550805  
AT5G24650,AT3G49560 Poptr1|661644,Poptr1|700741  
AT4G17260 Poptr1|704268,Poptr1|554197  
AT1G50840,AT3G20540  
Poptr1|590949,Poptr1|582238,Poptr1|571522,Poptr1|569110,Poptr1|571521  
AT1G79950 Poptr1|553709,Poptr1|548679  
AT2G05635,AT1G20720,AT1G20750 Poptr1|550758,Poptr1|594080,Poptr1|73171,Poptr1|108325  
AT5G08040 Poptr1|742374  
AT5G39220 Poptr1|694137,Poptr1|591186,Poptr1|577745  
Poptr1|577746  
AT1G13820 Poptr1|566934  
AT5G51300 Poptr1|554163,Poptr1|703000  
AT1G17560  
Poptr1|589319  
AT5G46160 Poptr1|676594,Poptr1|697862  
AT3G06930,AT5G49020 Poptr1|587296,Poptr1|746860,Poptr1|657892  
AT5G52880 Poptr1|355173  
AT3G12140,AT5G06780 Poptr1|734925,Poptr1|561266  
AT2G44440 Poptr1|697681,Poptr1|583281  
AT5G13020 Poptr1|48465,Poptr1|351074  
AT4G36980 Poptr1|716229,Poptr1|562971,Poptr1|558865  
AT5G45030  
AT2G35155 Poptr1|575614,Poptr1|705139  
AT3G12950 Poptr1|699175  
AT5G44785,AT4G20010  
AT1G31010 Poptr1|583053  
AT5G13100 Poptr1|554746,Poptr1|708762  
Poptr1|590702  
Poptr1|590701  
AT4G27585,AT5G54100  
Poptr1|591452,Poptr1|355437,Poptr1|355440,Poptr1|674968,Poptr1|661638,Poptr1|594155  
AT2G40490 Poptr1|357057,Poptr1|702404  
AT3G14930 Poptr1|568804,Poptr1|704980  
Poptr1|668079  
AT1G11040Poptr1|559252,Poptr1|347233  
AT1G56300 Poptr1|729451,Poptr1|690235  
Poptr1|558205  
Poptr1|573995  
Poptr1|654406,Poptr1|590821,Poptr1|654405,Poptr1|654403,Poptr1|670794  
AT2G33735  
AT1G44160  
AT5G16650 Poptr1|56778,Poptr1|573992  
AT2G41000 Poptr1|560275  
Poptr1|654068  
Poptr1|548742,Poptr1|551638  
AT2G20550  
AT1G10350,AT1G59725 Poptr1|721130,Poptr1|721167  
Poptr1|593839,Poptr1|649251  
AT5G49060  
AT4G13830 Poptr1|691690,Poptr1|597063  
AT5G25530 Poptr1|668972  
AT3G14200 Poptr1|673229,Poptr1|646029  
AT2G20560,AT4G28480  
Poptr1|679661,Poptr1|718246,Poptr1|562178,Poptr1|590820,Poptr1|594630,Poptr1|580946  
AT1G71000 Poptr1|698197  
Poptr1|562175,Poptr1|71672  
AT3G47940  
AT1G72416  
AT3G08910,AT5G01390  
AT1G21480 Poptr1|559331,Poptr1|684533  
Poptr1|596018,Poptr1|353252  
AT5G22450 Poptr1|556796,Poptr1|594983  
Poptr1|561036  
AT4G29790,AT2G19390 Poptr1|58468,Poptr1|352034  
AT1G09710,AT1G58220 Poptr1|692610  
AT5G47120 Poptr1|580169,Poptr1|712021,Poptr1|676443  
AT5G47130,AT4G17580  
Poptr1|735414  
AT5G42870 Poptr1|740368  
Poptr1|653756,Poptr1|667714  
AT3G09560  
AT4G17240 Poptr1|351242,Poptr1|575896

AT4G31420,AT2G24500 Poptr1|689089,Poptr1|745302  
AT4G12230 Poptr1|646484,Poptr1|581205  
Poptr1|583248  
AT5G40850  
Poptr1|579328  
AT5G48790 Poptr1|554104  
AT3G22560 Poptr1|593410  
AT2G32030,AT2G32020 Poptr1|593409,Poptr1|698063  
Poptr1|562496,Poptr1|102263  
Poptr1|690541,Poptr1|589746,Poptr1|593168,Poptr1|590204  
AT4G26120,AT1G64280  
Poptr1|72724,Poptr1|711056  
Poptr1|666831  
Poptr1|575565  
Poptr1|717192  
Poptr1|575566,Poptr1|677358  
Poptr1|705524  
AT5G45110,AT4G19660  
AT3G60620,AT2G45150 Poptr1|679341  
AT3G59870,AT2G43945 Poptr1|681222  
AT5G56980,AT4G26130 Poptr1|352092  
AT2G26110Poptr1|561661,Poptr1|577950  
Poptr1|669444  
AT4G30220 Poptr1|670628  
Poptr1|593481,Poptr1|673950,Poptr1|102707,Poptr1|596330,Poptr1|589109,Poptr1|579755,Poptr1|58910  
3,Poptr1|589104,Poptr1|100238,Poptr1|588341,Poptr1|100239,Poptr1|588346,Poptr1|586795,Poptr1|675440,Poptr1|1  
04872,Poptr1|573672,Poptr1|588356,Poptr1|101014,Poptr1|593078,Poptr1|573757,Poptr1|573729,Poptr1|665317,Pop  
tr1|573603,Poptr1|573591,Poptr1|106794,Poptr1|590942,Poptr1|102033,Poptr1|573538,Poptr1|104120,Poptr1|5735  
42,Poptr1|573539,Poptr1|101261,Poptr1|568967,Poptr1|568952,Poptr1|579519,Poptr1|568953,Poptr1|596201,Poptr1|  
594482,Poptr1|573665,Poptr1|597256,Poptr1|576653,Poptr1|573760,Poptr1|573730,Poptr1|61534,Poptr1|594015,Pop  
tr1|679711,Poptr1|596247,Poptr1|573586,Poptr1|591513,Poptr1|573598,Poptr1|106115,Poptr1|591476,Poptr1|59738  
9,Poptr1|579267,Poptr1|597390,Poptr1|101023,Poptr1|675445  
Poptr1|594345,Poptr1|102469,Poptr1|592525,Poptr1|101674,Poptr1|582100,Poptr1|101676,Poptr1|10616  
7,Poptr1|568968,Poptr1|102148,Poptr1|585711,Poptr1|103916,Poptr1|573594,Poptr1|593077,Poptr1|102826,Poptr1|5  
79993  
AT4G26090 Poptr1|344369  
AT1G62630,AT1G63360,AT1G63350,AT5G63020,AT1G12220,AT1G12210,AT1G12280,AT4G10780,AT1G12290,AT1  
G61310,AT1G61180,AT1G61300,AT1G61190,AT1G51480,AT5G43730,AT5G43740,AT1G15890,AT5G05400,AT5G47  
260,AT5G47250 Poptr1|49266  
Poptr1|677258,Poptr1|665200  
Poptr1|107255,Poptr1|581136,Poptr1|591037,Poptr1|594687,Poptr1|585791  
Poptr1|101015  
AT1G52660 Poptr1|104843,Poptr1|100235  
AT4G27190,AT4G27220 Poptr1|571475  
Poptr1|65193  
Poptr1|573671,Poptr1|597115,Poptr1|102695,Poptr1|568966,Poptr1|97911,Poptr1|108962,Poptr1|102851,  
Poptr1|101367  
Poptr1|583538  
AT3G15700 Poptr1|589110  
Poptr1|573574,Poptr1|590943,Poptr1|679299,Poptr1|592527,Poptr1|665201,Poptr1|579995,Poptr1|67544  
8,Poptr1|588347,Poptr1|588351,Poptr1|591512,Poptr1|101368,Poptr1|582890,Poptr1|105742,Poptr1|589111,Poptr1|6  
75446,Poptr1|665212,Poptr1|573612  
Poptr1|570186,Poptr1|575270  
AT4G25130 Poptr1|592961,Poptr1|733870,Poptr1|746972  
AT5G07470,AT5G61640,AT5G07460  
AT2G18030 Poptr1|655450  
AT1G58460 Poptr1|347575,Poptr1|572026  
AT1G48780,AT3G18300 Poptr1|574912,Poptr1|569809  
Poptr1|645710,Poptr1|548794  
AT5G64160 Poptr1|645709,Poptr1|645711  
AT1G08530 Poptr1|102107  
AT5G09995 Poptr1|562699  
Poptr1|585609  
Poptr1|571149,Poptr1|729932,Poptr1|585608,Poptr1|565484  
AT1G50910 Poptr1|569106  
AT3G15650,AT1G52700 Poptr1|693726,Poptr1|640642  
Poptr1|685512,Poptr1|58547  
AT5G20060  
AT1G47780,AT1G47786,AT1G52695,AT1G52460,AT1G52440,AT1G52470,AT1G51300  
AT1G44780,AT4G08310 Poptr1|692717,Poptr1|694554  
AT3G63460,AT1G18830 Poptr1|697534,Poptr1|64502  
AT4G18120,AT1G29400  
Poptr1|681223  
Poptr1|714870,Poptr1|551248  
AT1G37140 Poptr1|551502  
AT5G07290,AT5G61960  
AT3G26120,AT1G67770 Poptr1|354734  
AT5G07930  
AT2G42890  
Poptr1|680103,Poptr1|577156,Poptr1|705287,Poptr1|662241,Poptr1|733777,Poptr1|670015,Poptr1|66224  
0,Poptr1|693280,Poptr1|640107,Poptr1|640106  
AT5G59470,AT4G07390 Poptr1|591998

AT1G71480  
Poptr1|592358  
Poptr1|738750  
AT3G60200,AT2G44600 Poptr1|347737,Poptr1|591811  
Poptr1|571937  
AT5G01960 Poptr1|734405,Poptr1|702822  
AT1G61570 Poptr1|691911,Poptr1|727278  
AT3G61540 Poptr1|348019  
AT1G75690 Poptr1|73025,Poptr1|682014  
AT3G22100  
AT1G30670,AT2G34820 Poptr1|569330  
AT3G11964Poptr1|735126  
AT5G55080  
AT5G20020,AT5G20010  
AT5G55190 Poptr1|561857,Poptr1|578173,Poptr1|561858  
AT5G28400,AT5G28320,AT3G61780 Poptr1|572398  
AT1G77630,AT1G21880 Poptr1|651402,Poptr1|694555,Poptr1|692719  
Poptr1|593385  
AT2G17120 Poptr1|713449  
AT4G00420,AT1G80650 Poptr1|554856  
AT1G47640 Poptr1|591872,Poptr1|551894  
AT1G72170,AT1G22520 Poptr1|574232,Poptr1|592304  
AT1G11800Poptr1|675532,Poptr1|588570  
Poptr1|588565  
AT5G20420 Poptr1|567215  
AT3G42670 Poptr1|659448,Poptr1|659449,Poptr1|665302  
AT2G30710 Poptr1|695751  
AT2G40850,AT3G56600 Poptr1|344065  
Poptr1|583874  
AT1G13640,AT2G03890  
AT1G26270 Poptr1|659020,Poptr1|720820  
Poptr1|348028  
AT2G46200 Poptr1|572321  
Poptr1|680757  
Poptr1|573383  
AT4G28700 Poptr1|349086,Poptr1|645545  
Poptr1|64275  
AT1G64780 Poptr1|107497,Poptr1|571129,Poptr1|665333  
AT3G24290,AT3G24300,AT4G13510 Poptr1|565016  
Poptr1|573384  
AT4G30340 Poptr1|584672  
Poptr1|594751,Poptr1|591624,Poptr1|352440,Poptr1|585142  
Poptr1|585138  
Poptr1|653666  
AT2G18730,AT5G57690  
Poptr1|717612,Poptr1|680051,Poptr1|669482  
AT1G52530 Poptr1|597617  
AT2G20670,AT4G32480 Poptr1|704182,Poptr1|693941,Poptr1|96842,Poptr1|582726  
Poptr1|696856,Poptr1|724700  
AT1G77160,AT1G77145 Poptr1|654611,Poptr1|595380,Poptr1|551351,Poptr1|559338  
AT3G54550,AT2G38820  
AT3G25240  
Poptr1|559623,Poptr1|684590  
AT3G22970,AT4G14620 Poptr1|726454,Poptr1|720965  
Poptr1|703242,Poptr1|574188  
AT2G39650  
AT1G12030,AT1G62420 Poptr1|568182,Poptr1|99373  
AT1G21475  
AT3G07350 Poptr1|556733  
AT1G04670 Poptr1|63095,Poptr1|350657  
AT5G13950 Poptr1|553114,Poptr1|572866,Poptr1|102326  
AT1G04640 Poptr1|555282,Poptr1|639731  
AT1G47580,AT4G31050 Poptr1|644174  
AT2G46900 Poptr1|644697,Poptr1|664221  
AT1G26160 Poptr1|658979,Poptr1|656718  
AT2G23820 Poptr1|717716  
AT1G27470,AT4G07410  
Poptr1|551772,Poptr1|572025  
Poptr1|105772  
AT2G40430  
Poptr1|696754  
AT4G36050 Poptr1|593841,Poptr1|349864  
AT4G10925 Poptr1|63408,Poptr1|554506  
AT4G23960  
AT5G46030 Poptr1|568625,Poptr1|684053  
Poptr1|591705,Poptr1|591706,Poptr1|584425  
AT3G15190 Poptr1|579426  
AT5G19330 Poptr1|566277,Poptr1|696435  
AT5G13060 Poptr1|710754,Poptr1|559555  
AT2G35240,AT1G32580  
AT2G33430 Poptr1|673297,Poptr1|564971  
AT1G72530

Poptr1|725885  
 AT1G11430Poptr1|727762  
 AT3G06790 Poptr1|686965  
 Poptr1|696979  
 Poptr1|595385  
 AT3G10030 Poptr1|739674  
 AT3G18680 Poptr1|562424  
 AT1G69060 Poptr1|656689,Poptr1|659034  
 AT3G45590,AT3G45577,AT5G60230 Poptr1|557107  
 Poptr1|595936  
 AT5G43210 Poptr1|64447,Poptr1|64499,Poptr1|64453  
 AT5G64510 Poptr1|557580  
 AT1G47310  
 AT5G02760 Poptr1|589367,Poptr1|735431  
 AT5G66080,AT3G51370 Poptr1|690500,Poptr1|689686,Poptr1|649192,Poptr1|713388  
 Poptr1|553937  
 AT3G12620 Poptr1|724856,Poptr1|563814  
 AT3G55050  
 AT4G33920 Poptr1|691753,Poptr1|557483  
 AT4G38520  
 AT3G17090 Poptr1|686364  
 AT5G06750 Poptr1|561253,Poptr1|576256  
 Poptr1|72470,Poptr1|643603  
 AT1G77510,AT1G21750,AT3G62510  
 AT2G34980 Poptr1|343399,Poptr1|356443  
 AT5G55150,AT5G24040  
 Poptr1|346631,Poptr1|346621,Poptr1|63110  
 Poptr1|549413  
 AT5G60060  
 AT2G17030,AT2G17036 Poptr1|649176,Poptr1|556686  
 Poptr1|653794  
 AT5G20650 Poptr1|739168  
 Poptr1|103815  
 Poptr1|701463  
 AT5G06240  
 Poptr1|561462  
 AT2G26260,AT1G47290 Poptr1|653788  
 AT2G43420 Poptr1|562212  
 AT3G59950,AT2G44140 Poptr1|746288,Poptr1|562066  
 AT1G71800 Poptr1|347064  
 AT1G07290 Poptr1|557947  
 AT2G13650 Poptr1|558409,Poptr1|562463  
 Poptr1|583922,Poptr1|671374  
 AT5G37510 Poptr1|714215,Poptr1|552885  
 Poptr1|697450,Poptr1|683882  
 AT3G08530,AT3G11130 Poptr1|696774,Poptr1|567249  
 Poptr1|576610  
 Poptr1|642662  
 AT3G20180  
 Poptr1|582325,Poptr1|560065,Poptr1|560064  
 AT5G48290,AT3G07600 Poptr1|697571,Poptr1|705606,Poptr1|573139,Poptr1|596910,Poptr1|596909  
 AT1G55780 Poptr1|560066  
 AT4G05030 Poptr1|65612  
 AT3G14050,AT1G54130 Poptr1|103734,Poptr1|685048,Poptr1|584107,Poptr1|548569  
 Poptr1|571689  
 Poptr1|596260  
 Poptr1|571690  
 AT3G56480,AT2G40820 Poptr1|560354,Poptr1|576131  
 AT2G26770 Poptr1|49086,Poptr1|54632  
 AT3G43240 Poptr1|702688,Poptr1|577798  
 Poptr1|57788,Poptr1|349583,Poptr1|591635,Poptr1|545440,Poptr1|585736,Poptr1|71990,Poptr1|591131,Poptr1|72502,Poptr1|348378,Poptr1|576623,Poptr1|65055,Poptr1|576923,Poptr1|593017  
 AT1G42710 Poptr1|571487,Poptr1|576716,Poptr1|349470,Poptr1|588316,Poptr1|580454  
 Poptr1|586883,Poptr1|588701,Poptr1|72148,Poptr1|593068,Poptr1|574077,Poptr1|587043,Poptr1|593128  
 Poptr1|106765  
 Poptr1|546734,Poptr1|593751,Poptr1|577680,Poptr1|592564,Poptr1|585247,Poptr1|591286  
 Poptr1|63954  
 Poptr1|582672  
 Poptr1|579257  
 Poptr1|588780  
 Poptr1|102552  
 Poptr1|559460,Poptr1|593016,Poptr1|581388,Poptr1|591143,Poptr1|580907,Poptr1|574553,Poptr1|59246  
 5  
 Poptr1|593553,Poptr1|106080,Poptr1|592460,Poptr1|568640,Poptr1|65255,Poptr1|596895,Poptr1|593236,  
 Poptr1|105285,Poptr1|592776,Poptr1|577910,Poptr1|592597,Poptr1|581525,Poptr1|97024,Poptr1|353449,Poptr1|573  
 474,Poptr1|574126,Poptr1|595057,Poptr1|352330,Poptr1|568447,Poptr1|62754,Poptr1|62755,Poptr1|587621,Poptr1|5  
 95758,Poptr1|587223,Poptr1|584048,Poptr1|347786,Poptr1|573973,Poptr1|584330  
 Poptr1|578379  
 AT3G29450,AT1G41920,AT4G09660,AT1G19260,AT3G29763,AT3G29765  
 Poptr1|578056  
 AT1G66410,AT5G37780  
 AT3G51920

AT4G03290,AT1G05990  
AT4G37010  
AT4G12860  
AT3G50770 Poptr1|592402,Poptr1|593988,Poptr1|655240  
AT2G41410 Poptr1|560431,Poptr1|701333  
AT5G17480 Poptr1|554258  
AT1G76650,AT1G76640,AT5G42380  
Poptr1|694939,Poptr1|709761,Poptr1|64932,Poptr1|551911,Poptr1|583581,Poptr1|666641  
Poptr1|63656  
AT3G59450 Poptr1|672610  
AT3G07490 Poptr1|645381  
Poptr1|584868,Poptr1|595431,Poptr1|551119,Poptr1|559611  
AT5G39670,AT3G29000 Poptr1|712797,Poptr1|577660  
AT1G18210,AT1G73630 Poptr1|687739,Poptr1|666293  
AT3G59440,AT2G43290  
AT1G24620 Poptr1|345327  
AT3G03000 Poptr1|554051,Poptr1|346261  
AT3G43810 Poptr1|576061,Poptr1|723414,Poptr1|560295  
AT2G15680 Poptr1|697325  
AT3G50360 Poptr1|651063  
AT4G14640,AT3G22930 Poptr1|657221,Poptr1|658458  
AT3G10190  
AT3G25600 Poptr1|580673,Poptr1|658975  
Poptr1|702296,Poptr1|351579  
Poptr1|551505  
AT1G12310,AT1G62820 Poptr1|693490,Poptr1|671189  
AT3G56800,AT2G27030,AT2G41110  
AT5G49480 Poptr1|698324,Poptr1|564376  
AT1G21550 Poptr1|72514,Poptr1|342394  
AT5G21274  
AT2G41090,AT2G41100  
AT3G47480  
AT3G03430  
AT5G44460,AT4G20780 Poptr1|577233,Poptr1|676209  
Poptr1|645262,Poptr1|648114  
AT1G18530 Poptr1|596498  
Poptr1|564216  
AT2G36180,AT5G17470,AT3G03400,AT3G03410  
Poptr1|56977  
Poptr1|583392  
Poptr1|562983  
AT3G01830  
AT5G37770,AT1G66400 Poptr1|648111,Poptr1|709938  
AT1G32250  
Poptr1|562236,Poptr1|741464  
Poptr1|569388,Poptr1|580637  
Poptr1|588561,Poptr1|593142  
AT1G64650 Poptr1|709057,Poptr1|684833  
AT3G49310,AT4G27720 Poptr1|574699,Poptr1|569605  
AT2G23093 Poptr1|693609  
AT3G27670 Poptr1|683912  
Poptr1|641105  
AT1G07350  
Poptr1|63518  
Poptr1|712057  
AT4G35785 Poptr1|741196  
AT1G36980 Poptr1|651356,Poptr1|692695  
AT1G62250 Poptr1|588578,Poptr1|568048  
AT5G47140,AT4G17570 Poptr1|580168,Poptr1|589916  
AT4G33030 Poptr1|695100  
Poptr1|689350  
AT3G42830,AT5G20570  
Poptr1|553601  
Poptr1|584115  
AT1G66670 Poptr1|714111  
AT5G45390 Poptr1|346298,Poptr1|554124  
Poptr1|678327  
AT1G12410 Poptr1|690132  
Poptr1|581876  
AT5G23140 Poptr1|562818,Poptr1|650895  
Poptr1|580985,Poptr1|583229,Poptr1|592833,Poptr1|348156  
AT1G02560 Poptr1|731676,Poptr1|692259  
AT4G17040 Poptr1|580163  
AT1G11750Poptr1|697290,Poptr1|712936  
Poptr1|576562  
AT3G11530  
AT1G32410 Poptr1|676506,Poptr1|678023,Poptr1|743194  
Poptr1|344537  
AT3G24650  
AT1G28300 Poptr1|555780,Poptr1|580920  
AT3G26790 Poptr1|707114,Poptr1|597091  
AT4G19140 Poptr1|554122,Poptr1|739843

AT4G28740  
Poptr1|553270,Poptr1|688391  
AT1G27980 Poptr1|48584,Poptr1|350600  
Poptr1|640061  
AT3G46750 Poptr1|558036,Poptr1|549138  
Poptr1|65758,Poptr1|705560  
AT5G53860 Poptr1|579451,Poptr1|55954  
AT2G39570 Poptr1|353526,Poptr1|724757  
Poptr1|687401,Poptr1|686546  
AT2G36840 Poptr1|569300,Poptr1|550416  
Poptr1|683832  
AT5G22770,AT5G22780 Poptr1|594849  
AT2G05170 Poptr1|57340  
AT3G53260,AT2G37040 Poptr1|667815,Poptr1|739482,Poptr1|696959,Poptr1|725007  
AT5G04230,AT3G10340  
AT5G37290 Poptr1|63816  
AT2G01640 Poptr1|642025,Poptr1|649609  
AT3G03380 Poptr1|714140,Poptr1|555951,Poptr1|684188  
AT3G22435 Poptr1|345406,Poptr1|566242  
AT1G55060  
AT5G20620,AT5G03240  
AT4G02890  
AT1G65350 Poptr1|571493  
Poptr1|648070  
Poptr1|552893  
AT1G11980  
Poptr1|679519,Poptr1|569085  
AT1G11970 Poptr1|590985  
Poptr1|574686,Poptr1|728795,Poptr1|735338  
AT1G23410  
AT3G52590,AT2G36170  
Poptr1|555369  
AT1G53930  
AT5G37640  
Poptr1|595194  
AT3G62250,AT2G47110  
Poptr1|577089  
Poptr1|733868,Poptr1|746989,Poptr1|684249,Poptr1|547834,Poptr1|731613  
Poptr1|705668  
Poptr1|691451  
Poptr1|589416  
AT2G35635  
Poptr1|560446  
Poptr1|679853  
Poptr1|727606  
Poptr1|562287  
AT4G05050  
AT4G05320 Poptr1|569086,Poptr1|556631  
AT1G31340  
AT3G09790 Poptr1|671548  
AT5G09340  
AT1G53980,AT1G53950  
Poptr1|693069,Poptr1|714807,Poptr1|694382,Poptr1|562862  
Poptr1|748843,Poptr1|584659  
Poptr1|582627  
AT4G03120 Poptr1|693717  
AT3G02690  
Poptr1|580448,Poptr1|575861,Poptr1|728535  
Poptr1|676942  
Poptr1|565808  
AT5G03500,AT5G03220 Poptr1|561207  
AT5G53700,AT5G03480,AT3G09160,AT5G05430  
Poptr1|683015  
AT2G25350,AT4G32160 Poptr1|103791,Poptr1|578225,Poptr1|352941  
AT3G15920 Poptr1|703906  
AT2G26550 Poptr1|703100  
AT1G69720,AT1G58300  
AT2G26670 Poptr1|560611  
Poptr1|648784,Poptr1|721710,Poptr1|721707  
Poptr1|648786  
AT5G02880 Poptr1|739328  
Poptr1|721711  
AT4G38600 Poptr1|713324  
AT2G39260 Poptr1|353446  
AT4G08870,AT4G08900 Poptr1|572088,Poptr1|692439  
AT5G53280 Poptr1|569474,Poptr1|586574  
AT3G58480 Poptr1|667534,Poptr1|561205  
Poptr1|349356,Poptr1|592799,Poptr1|349355  
AT3G13600 Poptr1|62708,Poptr1|351019,Poptr1|62704

Poptr1|575652  
AT4G33050,AT2G26190 Poptr1|717926  
Poptr1|592075  
AT5G57010  
AT3G52870 Poptr1|739731  
Poptr1|576146  
Poptr1|695333  
Poptr1|696988  
AT5G12200 Poptr1|64611,Poptr1|722704  
Poptr1|351384  
AT3G10820,AT5G05140 Poptr1|701304,Poptr1|576137,Poptr1|560356  
AT1G19600 Poptr1|680482,Poptr1|651950,Poptr1|692926  
Poptr1|707006,Poptr1|742850  
AT3G27100  
AT5G04360  
Poptr1|575436  
AT3G17350 Poptr1|564336,Poptr1|682606  
AT1G71230,AT1G22920 Poptr1|672596,Poptr1|583154,Poptr1|737519  
Poptr1|593685  
Poptr1|746941,Poptr1|678271  
AT3G03310 Poptr1|686428  
AT4G19860  
Poptr1|666851  
AT5G07490,AT5G61630 Poptr1|63321  
AT4G16840 Poptr1|589906,Poptr1|553927  
AT2G35360 Poptr1|690005  
AT4G34412 Poptr1|557382,Poptr1|744274  
AT5G50760 Poptr1|63168,Poptr1|693261,Poptr1|570308  
Poptr1|646032  
AT3G61900  
AT3G03850,AT3G03830,AT3G03840,AT3G03820,AT5G18020,AT5G18080,AT5G18010,AT5G18030,AT5G18050,AT5  
G18060,AT2G21200,AT3G03847,AT4G13790,AT4G38850  
AT5G03310 Poptr1|676029  
AT4G34770 Poptr1|546167  
AT1G56150,AT3G12830 Poptr1|655028,Poptr1|650935  
AT5G53590  
Poptr1|567629,Poptr1|353369  
Poptr1|551225  
AT4G12410,AT4G22620 Poptr1|554218,Poptr1|581224  
AT2G36210 Poptr1|344544  
AT1G79130,AT1G16510  
AT3G09870 Poptr1|576714  
AT3G20220  
Poptr1|556573,Poptr1|649288  
Poptr1|578961,Poptr1|560619  
Poptr1|574684,Poptr1|569631  
AT3G51200,AT5G66260  
Poptr1|649291,Poptr1|557152,Poptr1|556557,Poptr1|649292,Poptr1|649293,Poptr1|648718,Poptr1|55656  
2,Poptr1|557149,Poptr1|557145,Poptr1|557146,Poptr1|556564,Poptr1|648719,Poptr1|556563,Poptr1|556565,Poptr1|5  
46165,Poptr1|54410,Poptr1|556560  
AT4G36110,AT2G18010  
AT1G19830,AT1G75580,AT2G21220,AT4G38860,AT2G16580,AT4G34760  
Poptr1|715404,Poptr1|550905,Poptr1|713175,Poptr1|563277  
AT2G46690 Poptr1|664170,Poptr1|348136  
AT1G19840,AT1G75590,AT5G10990 Poptr1|559812,Poptr1|642994  
Poptr1|670338,Poptr1|549894  
AT4G00880  
AT4G09530 Poptr1|574266,Poptr1|592258  
AT4G34750  
AT2G45210,AT3G60690 Poptr1|552025,Poptr1|572079  
AT2G24400,AT4G31320 Poptr1|60821  
Poptr1|563431  
AT5G20810,AT3G43120 Poptr1|58440  
AT4G34800 Poptr1|104026,Poptr1|556572,Poptr1|557144,Poptr1|648723  
AT2G28085  
Poptr1|556554,Poptr1|54414  
AT4G34790,AT4G34810  
Poptr1|556571  
AT4G34780  
Poptr1|557147  
Poptr1|571173  
AT3G53250,AT2G37030  
AT2G21210,AT4G38840 Poptr1|649286,Poptr1|546169,Poptr1|649287  
AT3G01260,AT5G15140  
Poptr1|348788  
Poptr1|585983  
AT3G47800 Poptr1|575692,Poptr1|699262  
AT3G17940 Poptr1|687734  
Poptr1|583777,Poptr1|736262,Poptr1|714475,Poptr1|736257  
AT1G08110 Poptr1|673382  
AT3G59580,AT2G43500 Poptr1|104282,Poptr1|594604,Poptr1|75355,Poptr1|595829  
Poptr1|648927

AT4G24020,AT1G64530 Poptr1|554523,Poptr1|63391  
Poptr1|588113,Poptr1|587907  
Poptr1|108139,Poptr1|62962,Poptr1|593472,Poptr1|592933,Poptr1|592936  
AT1G76350,AT1G20640 Poptr1|52269,Poptr1|346576  
Poptr1|547870,Poptr1|100742,Poptr1|642100,Poptr1|62951,Poptr1|595816  
AT4G38340  
AT2G17150,AT4G35270 Poptr1|54253  
AT5G59410,AT2G29020 Poptr1|706128,Poptr1|558063  
AT2G47870,AT3G62950 Poptr1|664494,Poptr1|665154  
AT5G63030 Poptr1|570110,Poptr1|682958  
Poptr1|664489,Poptr1|664491,Poptr1|573477,Poptr1|57426  
Poptr1|680653  
Poptr1|586055,Poptr1|555743  
AT4G15660,AT4G15670,AT4G15690,AT4G15680,AT4G15700,AT5G18600 Poptr1|657995  
Poptr1|706742  
AT5G14070,AT3G02000 Poptr1|63170,Poptr1|554735,Poptr1|641846  
AT5G40370  
AT1G03020,AT3G62930 Poptr1|573478,Poptr1|731915  
AT4G33040 Poptr1|577834,Poptr1|561643  
AT5G11930  
Poptr1|349076  
AT1G03850,AT1G28480 Poptr1|741532,Poptr1|654414  
AT2G20270,AT4G28730  
AT2G47880,AT3G62960,AT1G06830,AT2G30540 Poptr1|572742,Poptr1|573501  
AT2G25280 Poptr1|654187,Poptr1|702038  
AT5G54090 Poptr1|355445  
Poptr1|580888  
AT1G65070  
Poptr1|552804  
Poptr1|693924  
AT5G63270,AT3G48450 Poptr1|570200,Poptr1|733507  
AT5G55850 Poptr1|660672,Poptr1|550220  
AT5G40645  
Poptr1|64873  
Poptr1|732478  
AT2G17660  
AT2G01770 Poptr1|585779,Poptr1|726760  
Poptr1|580654  
AT5G09400 Poptr1|48865,Poptr1|712230  
Poptr1|586210,Poptr1|569359  
Poptr1|548243,Poptr1|103984  
AT4G23640 Poptr1|693406  
AT2G40540 Poptr1|689932  
Poptr1|103399  
AT4G13420 Poptr1|63229,Poptr1|746851,Poptr1|108630  
Poptr1|581289,Poptr1|558728  
Poptr1|350055  
Poptr1|581260  
AT2G35060,AT1G31120 Poptr1|690159,Poptr1|554185  
AT2G30070 Poptr1|54609  
AT1G70300 Poptr1|345379,Poptr1|698112  
AT3G02050 Poptr1|684170,Poptr1|572873  
Poptr1|350428  
AT1G60160 Poptr1|345378  
Poptr1|354351,Poptr1|566382  
Poptr1|75982,Poptr1|562857,Poptr1|587314,Poptr1|579569,Poptr1|595276,Poptr1|587315  
AT4G19960  
AT5G14880  
AT4G33530  
Poptr1|569358  
AT1G71310 Poptr1|581016  
AT5G47870 Poptr1|693302,Poptr1|690997  
AT5G36700,AT5G36790 Poptr1|696747,Poptr1|55442  
AT5G47760 Poptr1|717277,Poptr1|671977  
AT3G14110Poptr1|98993  
AT5G18120,AT3G03860 Poptr1|573932,Poptr1|699882  
Poptr1|353367  
Poptr1|596302  
Poptr1|725017  
AT3G48430 Poptr1|662090,Poptr1|666581  
AT5G04240  
Poptr1|662091  
AT5G13170 Poptr1|554733,Poptr1|63173  
AT1G21460 Poptr1|551367,Poptr1|551366,Poptr1|692768,Poptr1|551365,Poptr1|694605  
Poptr1|65389  
Poptr1|729496  
Poptr1|570771,Poptr1|596138,Poptr1|729499,Poptr1|581895  
AT5G62850,AT3G28007 Poptr1|706793  
AT5G40260  
AT3G16690,AT4G15920  
AT4G10850,AT1G66770  
AT3G14770 Poptr1|746249,Poptr1|707872



AT2G39060 Poptr1|592972  
AT4G25010,AT5G50800,AT3G48740,AT5G23660 Poptr1|575409  
AT5G50790 Poptr1|575408,Poptr1|592088,Poptr1|570313  
Poptr1|350380  
AT5G53190 Poptr1|586564,Poptr1|569481  
AT3G01180Poptr1|688944  
AT5G24300  
AT1G32900 Poptr1|705646,Poptr1|642515,Poptr1|569276  
AT3G11950Poptr1|695271  
AT3G60650 Poptr1|591665,Poptr1|347827  
Poptr1|545481,Poptr1|545886,Poptr1|545480  
AT4G27640 Poptr1|698416,Poptr1|696720  
AT5G19820 Poptr1|555202,Poptr1|48434  
Poptr1|75799,Poptr1|562668,Poptr1|591030,Poptr1|556326,Poptr1|591033,Poptr1|556017,Poptr1|556016,  
Poptr1|348714  
Poptr1|594185,Poptr1|573936  
AT2G27090 Poptr1|556853  
AT4G39790 Poptr1|654804,Poptr1|71662  
Poptr1|654805  
Poptr1|107556  
AT5G23480 Poptr1|648421  
AT3G51120Poptr1|593878,Poptr1|563248  
Poptr1|568469  
Poptr1|568468  
AT2G16485  
AT5G63700 Poptr1|65185  
AT2G16470  
AT2G16480 Poptr1|556531,Poptr1|557178  
Poptr1|593044  
AT2G18090  
AT5G08430 Poptr1|556277  
Poptr1|717953,Poptr1|668935  
AT1G79880  
AT4G32720  
AT5G64370 Poptr1|695809  
AT2G28020,AT2G28230,AT4G09070 Poptr1|593974,Poptr1|739120  
Poptr1|648537,Poptr1|668653  
AT3G02080,AT5G15520,AT5G61170 Poptr1|596443  
Poptr1|560533,Poptr1|554132  
AT5G45380  
AT5G51820 Poptr1|575734,Poptr1|570540  
AT1G23190,AT1G70730 Poptr1|696513,Poptr1|658745  
AT4G13440  
Poptr1|591012,Poptr1|591016,Poptr1|101696,Poptr1|582992,Poptr1|585598,Poptr1|585596,Poptr1|99736,  
Poptr1|589241,Poptr1|674024,Poptr1|704957,Poptr1|589246,Poptr1|594401,Poptr1|583589,Poptr1|101412,Poptr1|58  
5599,Poptr1|595910,Poptr1|670929,Poptr1|101407  
Poptr1|648939  
AT1G49720,AT3G19290,AT4G34000 Poptr1|744297,Poptr1|54505  
Poptr1|550249  
AT1G45249 Poptr1|551849,Poptr1|591957  
AT2G36270 Poptr1|351746  
AT5G42910  
Poptr1|671427  
Poptr1|649548  
AT3G19190 Poptr1|649546  
Poptr1|671428,Poptr1|649547,Poptr1|101309,Poptr1|349343,Poptr1|671430  
AT1G68100 Poptr1|658676,Poptr1|720768  
AT3G55440 Poptr1|656103,Poptr1|698577  
Poptr1|558071,Poptr1|691399  
AT2G21170Poptr1|713199,Poptr1|721808  
AT2G22140,AT2G21800 Poptr1|562750  
Poptr1|562749  
AT4G33625  
Poptr1|562369,Poptr1|736007  
AT1G56590 Poptr1|97615,Poptr1|570692  
AT4G24160 Poptr1|550934,Poptr1|694821  
AT4G19070 Poptr1|590104  
AT5G38840 Poptr1|584644  
AT3G25980 Poptr1|726128,Poptr1|720448  
Poptr1|576854  
AT4G27360 Poptr1|584663,Poptr1|97894,Poptr1|699119,Poptr1|555491  
AT5G20110  
AT1G23220  
Poptr1|696510,Poptr1|687146  
AT1G52250 Poptr1|645953  
AT3G16120  
Poptr1|575070  
Poptr1|680567,Poptr1|660964,Poptr1|579479,Poptr1|350042,Poptr1|356795  
AT1G48520 Poptr1|345472  
AT5G55690 Poptr1|588539,Poptr1|64150,Poptr1|349092  
AT2G28190  
Poptr1|99154

Poptr1|585000  
Poptr1|665465,Poptr1|729961  
Poptr1|721328  
AT5G18100  
AT1G08830 Poptr1|570930,Poptr1|595511  
AT3G04720 Poptr1|662933,Poptr1|680266,Poptr1|571046,Poptr1|59936,Poptr1|571045  
Poptr1|52112,Poptr1|342276,Poptr1|56639,Poptr1|577018,Poptr1|104205,Poptr1|593772  
Poptr1|670324,Poptr1|584869,Poptr1|670323,Poptr1|65191,Poptr1|677959,Poptr1|106998,Poptr1|582118  
AT2G38290 Poptr1|351934  
Poptr1|65190,Poptr1|103159  
Poptr1|595409,Poptr1|677326,Poptr1|352860  
AT1G63680 Poptr1|63533  
AT1G76600,AT1G21010 Poptr1|550706,Poptr1|73228  
Poptr1|658086  
AT4G33380 Poptr1|591923,Poptr1|692519  
AT5G47420,AT4G17420 Poptr1|646130,Poptr1|689448  
AT4G05150 Poptr1|568318,Poptr1|555470  
AT1G25300  
AT5G49920 Poptr1|98666  
AT5G09620,AT5G64430 Poptr1|649767,Poptr1|642169  
Poptr1|354454,Poptr1|583744,Poptr1|553762,Poptr1|673822  
AT3G18230 Poptr1|345824  
AT2G01190Poptr1|596116,Poptr1|547562,Poptr1|354204,Poptr1|566565  
AT3G48240,AT5G63130 Poptr1|666525,Poptr1|699415  
AT3G26510,AT1G70640  
Poptr1|697974,Poptr1|565159  
Poptr1|347495  
AT3G24715 Poptr1|350664,Poptr1|63088  
AT5G08630 Poptr1|582176  
AT5G47940 Poptr1|641349  
AT4G33985 Poptr1|557391  
Poptr1|655148,Poptr1|558864  
AT3G50350  
AT2G15610,AT2G15590  
AT1G08790 Poptr1|571053,Poptr1|595407  
AT3G04700,AT5G28690  
AT3G06540  
Poptr1|596067,Poptr1|596331,Poptr1|588654,Poptr1|101186,Poptr1|565177,Poptr1|595691,Poptr1|58269  
1,Poptr1|561075,Poptr1|592115,Poptr1|71891  
AT4G03150 Poptr1|572752  
AT3G16730 Poptr1|596112,Poptr1|565557  
AT2G07771,AT2G07681 Poptr1|102096,Poptr1|102519  
AT5G03905 Poptr1|652963  
AT1G10500  
Poptr1|650825,Poptr1|654895  
AT2G46225 Poptr1|711266,Poptr1|664050  
AT5G47860 Poptr1|63253,Poptr1|693303  
Poptr1|674593  
AT5G54960  
Poptr1|693970,Poptr1|585869,Poptr1|699046  
Poptr1|641496  
AT5G01330,AT5G01320,AT4G33070 Poptr1|560932,Poptr1|701635  
Poptr1|674721  
AT5G44500,AT4G20440 Poptr1|569311  
AT1G07480,AT1G07470 Poptr1|723212,Poptr1|706098  
AT5G59230  
AT1G53035,AT3G15358  
Poptr1|693939,Poptr1|743813,Poptr1|98213,Poptr1|568897,Poptr1|579464,Poptr1|591069  
AT1G75630 Poptr1|551446,Poptr1|715363  
Poptr1|648708  
AT2G16510  
AT4G34720 Poptr1|557166  
AT1G19910 Poptr1|710566  
AT4G38920  
Poptr1|655432  
AT4G34450,AT2G16200  
Poptr1|694156,Poptr1|697279  
AT3G27110Poptr1|691641  
Poptr1|581565,Poptr1|582254  
AT2G07722 Poptr1|679412  
AT4G24350,AT4G24340  
AT4G28940 Poptr1|673164  
Poptr1|571436,Poptr1|681196,Poptr1|681195,Poptr1|592447,Poptr1|678202,Poptr1|592357,Poptr1|70323  
9,Poptr1|573862  
AT5G17660 Poptr1|594726,Poptr1|730135  
Poptr1|346198  
AT2G34960 Poptr1|63285,Poptr1|554606  
AT1G17120 Poptr1|49428  
AT1G58030,AT5G36940 Poptr1|573976,Poptr1|571264  
AT4G21120Poptr1|570928,Poptr1|356336  
AT3G03720  
Poptr1|680616,Poptr1|550319,Poptr1|669309

AT3G10600,AT5G04770 Poptr1|747570,Poptr1|720451,Poptr1|567910  
AT1G05940 Poptr1|342644  
AT5G41330 Poptr1|63525,Poptr1|350247  
AT3G09030 Poptr1|576939  
Poptr1|658944,Poptr1|564489,Poptr1|700814  
Poptr1|715230,Poptr1|643102  
AT4G34540 Poptr1|686702  
Poptr1|587881  
AT1G75290,AT1G75280,AT1G75300,AT1G19540  
Poptr1|589048  
Poptr1|590096  
Poptr1|678176,Poptr1|748142,Poptr1|108380,Poptr1|681467,Poptr1|58990,Poptr1|562283  
AT4G13660,AT1G32100 Poptr1|646332,Poptr1|590095  
AT4G39230 Poptr1|546669,Poptr1|557236,Poptr1|563044,Poptr1|60692  
AT3G06200 Poptr1|54933,Poptr1|565307  
AT3G10360 Poptr1|353353  
Poptr1|641163  
Poptr1|347611,Poptr1|592032  
Poptr1|580050  
Poptr1|550537,Poptr1|569190  
Poptr1|348107  
Poptr1|580051  
Poptr1|670661,Poptr1|596229  
AT5G43110,AT5G43090,AT4G08560  
Poptr1|563924,Poptr1|567395  
AT2G29190,AT2G29200,AT2G29140 Poptr1|558039,Poptr1|64350  
AT4G25880  
AT5G56510 Poptr1|48426,Poptr1|350993  
AT3G20250  
AT1G35750,AT1G35730,AT4G08840  
Poptr1|65250  
Poptr1|670660,Poptr1|579130  
AT1G78160,AT1G22240 Poptr1|347371  
Poptr1|655636  
AT3G24090 Poptr1|58955  
Poptr1|588931  
AT5G60730  
Poptr1|563717,Poptr1|725022  
AT3G10350  
AT5G12390 Poptr1|557911  
AT3G57090 Poptr1|652627,Poptr1|701329  
AT5G48310 Poptr1|57364  
AT5G65440  
AT4G24610 Poptr1|551641  
Poptr1|551640  
AT5G18760,AT3G06330 Poptr1|565263  
AT3G09760,AT5G03180 Poptr1|589422  
Poptr1|351297,Poptr1|701269  
AT5G60580 Poptr1|558248  
AT1G64385 Poptr1|646745,Poptr1|548347  
AT3G56040 Poptr1|698486  
AT2G23890 Poptr1|352397,Poptr1|669518,Poptr1|737908  
AT3G55420 Poptr1|656097,Poptr1|724701  
AT3G42630 Poptr1|584573  
AT2G27590 Poptr1|556730,Poptr1|552086  
Poptr1|571242  
AT5G17930 Poptr1|571243  
AT2G02880 Poptr1|732747,Poptr1|569611  
AT3G17970 Poptr1|728734  
Poptr1|676919  
AT5G09420 Poptr1|548801  
AT1G08980 Poptr1|705627,Poptr1|662772  
AT3G28730 Poptr1|577589,Poptr1|712808  
AT4G00090 Poptr1|730864,Poptr1|711141  
AT3G61930 Poptr1|348158,Poptr1|572459  
AT1G16870 Poptr1|700078  
AT5G59140 Poptr1|558014  
AT1G09770 Poptr1|571093,Poptr1|738228  
AT3G19180 Poptr1|569436,Poptr1|96955,Poptr1|569434  
AT4G34850 Poptr1|54407,Poptr1|546176  
Poptr1|647332  
Poptr1|662365,Poptr1|591584  
Poptr1|585734  
Poptr1|62886  
AT5G13930 Poptr1|572875  
Poptr1|651385  
Poptr1|554828,Poptr1|554829,Poptr1|107268,Poptr1|683579,Poptr1|554827  
AT4G00040  
Poptr1|596295  
AT1G02050 Poptr1|551991,Poptr1|59379  
AT4G12830 Poptr1|573185  
AT5G10700 Poptr1|669240,Poptr1|680611

AT5G42560 Poptr1|559820,Poptr1|692966  
AT1G75700,AT1G19950  
AT2G36020 Poptr1|576530,Poptr1|561433  
Poptr1|546171  
Poptr1|719457,Poptr1|557282  
AT4G36690 Poptr1|719459,Poptr1|356996  
AT2G33440  
AT2G33435 Poptr1|647996,Poptr1|670968  
AT1G60830,AT1G60900  
AT5G36670,AT5G36740 Poptr1|346970,Poptr1|559568  
Poptr1|98366,Poptr1|349780,Poptr1|589901  
AT3G14980  
AT4G14920  
AT5G63900  
AT5G58610 Poptr1|551783,Poptr1|557671  
AT1G05380 Poptr1|704618,Poptr1|657157,Poptr1|657158,Poptr1|658524,Poptr1|658523  
AT1G60740,AT1G65970,AT1G65980 Poptr1|683108,Poptr1|571552  
AT3G06050 Poptr1|573766  
AT3G52960 Poptr1|703237  
AT2G43410 Poptr1|562213  
Poptr1|588085  
AT5G03940 Poptr1|352507,Poptr1|58062  
Poptr1|587617  
AT2G45770  
Poptr1|347935  
Poptr1|676315  
AT1G05850  
AT1G02360,AT4G01700 Poptr1|692222,Poptr1|57143  
AT3G12500 Poptr1|649164,Poptr1|721563,Poptr1|697148,Poptr1|556708,Poptr1|649160  
Poptr1|558799  
AT2G43570  
Poptr1|694264  
Poptr1|564414  
AT2G43620,AT2G43610,AT2G43600,AT1G56680  
AT2G43590,AT3G47540,AT2G43580  
Poptr1|677164  
AT3G54420 Poptr1|665854,Poptr1|745071  
Poptr1|557011,Poptr1|557007,Poptr1|649163  
Poptr1|556713  
AT3G16920 Poptr1|698300  
Poptr1|680898  
Poptr1|574381,Poptr1|689314,Poptr1|582769,Poptr1|109098,Poptr1|574380  
AT5G09270 Poptr1|654678,Poptr1|558447  
AT3G54360 Poptr1|647379,Poptr1|708415  
Poptr1|587260  
AT5G09230 Poptr1|51687  
AT2G21530 Poptr1|703528,Poptr1|697096  
Poptr1|573133  
AT4G26550,AT5G56020 Poptr1|690276  
Poptr1|579565,Poptr1|588471,Poptr1|593778,Poptr1|593779  
Poptr1|563295  
Poptr1|588141,Poptr1|643880,Poptr1|100889  
AT1G58200 Poptr1|588142  
AT5G10490 Poptr1|643882  
AT3G18610 Poptr1|695973  
AT1G35660 Poptr1|665756,Poptr1|574275  
Poptr1|595394  
AT5G06370 Poptr1|561143  
Poptr1|106807,Poptr1|648211,Poptr1|741019  
AT5G16360,AT5G16330,AT3G02700  
AT4G00905,AT1G01225 Poptr1|644614,Poptr1|700304  
Poptr1|595395,Poptr1|571064  
Poptr1|556059  
AT5G41010  
Poptr1|661185  
AT1G53690  
AT1G23780,AT1G23770,AT1G70360 Poptr1|574813  
AT3G56720 Poptr1|667287,Poptr1|652599  
AT4G03130 Poptr1|664511  
AT3G21480 Poptr1|657895  
Poptr1|105479,Poptr1|348524,Poptr1|732453  
AT3G52980,AT2G05160 Poptr1|552686  
AT4G32695 Poptr1|561797,Poptr1|578118  
AT4G32700  
Poptr1|668958  
Poptr1|668959  
AT5G41470 Poptr1|63507,Poptr1|350266  
AT2G22400,AT4G40000 Poptr1|71614,Poptr1|685974,Poptr1|576798  
AT5G07320,AT5G61810  
AT5G51050 Poptr1|575487,Poptr1|570383  
Poptr1|649489

AT3G48630,AT3G44150 Poptr1|576477,Poptr1|561165  
 Poptr1|97471  
 AT3G11800  
 AT2G15910  
 AT5G08450 Poptr1|702356,Poptr1|545853,Poptr1|103118  
 Poptr1|596604,Poptr1|573590,Poptr1|596603  
 AT3G10060 Poptr1|576771  
 AT2G26230 Poptr1|698784  
 AT4G06676 Poptr1|596720  
 AT1G55810 Poptr1|708138,Poptr1|582568  
 AT4G26510  
 AT3G27440 Poptr1|577497  
 AT3G27190,AT5G40870 Poptr1|596641,Poptr1|691636  
 AT1G55300 Poptr1|555214,Poptr1|639652  
 AT1G56090 Poptr1|71850  
 AT1G29320 Poptr1|575319,Poptr1|570229,Poptr1|570227  
 AT3G12380 Poptr1|698571  
 Poptr1|568573  
 AT2G34640 Poptr1|550130  
 AT4G16320 Poptr1|643020,Poptr1|559801  
 AT1G31600 Poptr1|350018  
 AT1G23390 Poptr1|566051  
 AT3G24760  
 AT5G51040 Poptr1|666780  
 AT5G65250 Poptr1|558514,Poptr1|75703  
 AT1G16180 Poptr1|555149,Poptr1|547725  
 AT3G06170 Poptr1|354925  
 AT2G17990,AT4G36105,AT5G66250 Poptr1|696164,Poptr1|593860,Poptr1|559708  
 AT3G49180 Poptr1|551844,Poptr1|703129  
 Poptr1|568767  
 Poptr1|575328  
 AT5G23290 Poptr1|695956,Poptr1|558668  
 AT5G09910,AT5G64813 Poptr1|650824,Poptr1|682326  
 AT5G32440 Poptr1|560577,Poptr1|58786  
 AT1G80040 Poptr1|593918  
 AT5G02510  
 AT4G31770 Poptr1|578319  
 AT3G06680,AT3G06700 Poptr1|659050,Poptr1|656674,Poptr1|342916  
 AT2G48030 Poptr1|572787  
 Poptr1|572788  
 AT3G21530 Poptr1|354892,Poptr1|565690  
 AT3G10860,AT5G05370 Poptr1|571933,Poptr1|665904  
 AT4G13195,AT3G24770 Poptr1|569594  
 Poptr1|553323  
 AT5G44040,AT1G04030  
 AT2G33400 Poptr1|657299  
 AT5G48580  
 AT1G58450 Poptr1|674429,Poptr1|589784  
 AT5G45680 Poptr1|554616,Poptr1|691008  
 AT5G48570  
 AT3G25220 Poptr1|553220  
 Poptr1|591592,Poptr1|560334,Poptr1|576113  
 AT4G39710 Poptr1|562642,Poptr1|715944  
 AT3G25230 Poptr1|692053  
 AT5G64350 Poptr1|718535  
 Poptr1|347571  
 Poptr1|688312  
 Poptr1|571236,Poptr1|573893  
 AT5G18260  
 AT1G11390,AT1G61640 Poptr1|544987,Poptr1|568314  
 Poptr1|544986  
 Poptr1|351313,Poptr1|47765  
 AT3G60360 Poptr1|670157  
 AT1G63855 Poptr1|679091  
 AT5G10800,AT5G25060 Poptr1|344775,Poptr1|689072  
 AT3G49990 Poptr1|346740,Poptr1|694818  
 AT1G06950 Poptr1|700079,Poptr1|574507  
 Poptr1|574679,Poptr1|699557,Poptr1|574106  
 AT5G51660 Poptr1|574680  
 AT3G46780 Poptr1|723209,Poptr1|549130  
 AT1G03150 Poptr1|651769,Poptr1|643298  
 AT1G04010 Poptr1|573403  
 AT1G54180,AT3G14000  
 AT5G20540 Poptr1|58433,Poptr1|344358  
 AT1G31880,AT2G21030,AT2G35600 Poptr1|346294,Poptr1|343511  
 AT1G54190 Poptr1|548591,Poptr1|693739  
 Poptr1|569922  
 AT3G45755  
 AT2G27290 Poptr1|679907,Poptr1|648960  
 Poptr1|345107,Poptr1|564011  
 AT3G19820

AT1G70920,AT2G01430  
AT4G16780 Poptr1|349764,Poptr1|740060  
AT5G06710 Poptr1|735065,Poptr1|561243,Poptr1|650344,Poptr1|745407  
AT2G22800,AT4G37790 Poptr1|72115,Poptr1|718008  
Poptr1|684435  
Poptr1|560630  
AT5G47370,AT4G17460  
AT3G60390,AT2G44910 Poptr1|711127,Poptr1|591798  
Poptr1|566499,Poptr1|354246  
Poptr1|75341  
AT5G48480 Poptr1|684136  
AT5G27390 Poptr1|570888  
AT4G33680 Poptr1|557573  
Poptr1|710171  
AT2G13810 Poptr1|597767,Poptr1|53435,Poptr1|346373  
AT5G13980 Poptr1|570344,Poptr1|687835,Poptr1|572860,Poptr1|692100,Poptr1|572859  
AT3G26720  
AT5G66150 Poptr1|343456  
AT1G48360 Poptr1|348688  
AT1G69740 Poptr1|692732  
Poptr1|107760,Poptr1|108345  
AT1G44318  
Poptr1|569667  
AT3G53210 Poptr1|588291,Poptr1|597508,Poptr1|76372  
Poptr1|711315,Poptr1|674086  
AT1G68170,AT1G25270  
AT4G30420 Poptr1|561389,Poptr1|578672,Poptr1|561388  
AT1G21890 Poptr1|559220,Poptr1|692716  
AT5G40240,AT5G40230,AT4G15540  
Poptr1|639794,Poptr1|647356,Poptr1|354400,Poptr1|575128  
Poptr1|569232,Poptr1|569235,Poptr1|569234  
AT1G11460,AT1G11450,AT1G01070,AT4G01430,AT4G01450,AT4G01440  
Poptr1|63584  
AT2G37450,AT2G37460 Poptr1|351743  
Poptr1|352409  
Poptr1|578673,Poptr1|590619  
AT3G18200  
Poptr1|65162  
AT4G08290 Poptr1|559219  
AT1G60050,AT1G70260  
AT5G47470 Poptr1|343411,Poptr1|589864  
Poptr1|582477,Poptr1|661220,Poptr1|569236  
AT3G45870  
AT1G75500 Poptr1|643041,Poptr1|694811  
AT5G13670 Poptr1|353510  
Poptr1|560335,Poptr1|576115  
AT5G07050 Poptr1|683550,Poptr1|712491  
AT4G24980  
AT1G09380 Poptr1|581635  
AT5G64700 Poptr1|691723,Poptr1|580005  
AT4G08300,AT1G44800  
AT1G43650 Poptr1|559378,Poptr1|347125  
AT3G30340 Poptr1|569240,Poptr1|550490,Poptr1|572488  
AT3G56620,AT2G40900  
AT4G16620  
AT2G39510 Poptr1|567472,Poptr1|656050  
Poptr1|72869,Poptr1|346861  
AT3G28070,AT3G28100,AT3G28080,AT3G28130,AT5G40210,AT3G28060  
AT3G28050 Poptr1|64888  
AT4G19185,AT5G45370 Poptr1|703839  
Poptr1|644688  
AT4G28040  
Poptr1|58591  
AT2G24270 Poptr1|578767,Poptr1|717030  
AT4G28005,AT5G52840 Poptr1|741118,Poptr1|648277  
Poptr1|345923  
Poptr1|575105  
AT5G13690  
Poptr1|581226,Poptr1|554217  
AT1G12250  
AT4G00550 Poptr1|731016  
AT3G11670,Poptr1|561146,Poptr1|576506  
AT4G36710 Poptr1|679258,Poptr1|655267  
AT2G45160,AT3G60630  
Poptr1|581250,Poptr1|554194  
AT4G00150 Poptr1|591663,Poptr1|592659,Poptr1|711203,Poptr1|342681  
AT3G02560,AT5G16130,AT1G48830  
Poptr1|670914,Poptr1|648028,Poptr1|351797,Poptr1|688799,Poptr1|574909  
AT5G53770 Poptr1|579472  
AT2G34920,AT1G30860,AT5G44690,AT4G20160 Poptr1|63273,Poptr1|693314  
AT1G15740 Poptr1|578853,Poptr1|60907  
AT5G35180 Poptr1|578799

AT1G06050 Poptr1|718318  
AT5G25020,AT5G24990,AT5G25010  
Poptr1|596069  
AT5G10750 Poptr1|578331  
AT3G54800 Poptr1|567614,Poptr1|563734  
AT4G19040,AT5G45560 Poptr1|343508,Poptr1|702971  
AT2G28320  
AT1G79960 Poptr1|63789,Poptr1|349554  
AT1G32730 Poptr1|593268,Poptr1|589946  
AT5G13140 Poptr1|63169,Poptr1|350582  
Poptr1|641842,Poptr1|683960,Poptr1|586673,Poptr1|589740  
AT3G26960,AT5G41050  
Poptr1|584621  
AT5G65750,AT3G55410 Poptr1|698598,Poptr1|686501  
AT3G15095 Poptr1|596924,Poptr1|550266  
AT5G52970 Poptr1|574866  
Poptr1|576713  
Poptr1|738712  
AT3G19895 Poptr1|567069,Poptr1|353834  
AT5G05230 Poptr1|574118  
AT2G40640  
AT4G26300,AT1G66530 Poptr1|684266  
Poptr1|579124  
AT1G06240 Poptr1|574350  
Poptr1|551157  
AT4G14830,AT3G22530 Poptr1|564853,Poptr1|591341,Poptr1|55124  
AT4G20360 Poptr1|646557,Poptr1|640547  
Poptr1|590508,Poptr1|106939  
AT4G02930 Poptr1|552665,Poptr1|572801  
AT5G53820,AT5G38760,AT5G15960,AT5G15970,AT3G02480  
Poptr1|748355,Poptr1|97049,Poptr1|648343,Poptr1|648345,Poptr1|648346,Poptr1|678670,Poptr1|648335,  
Poptr1|648341,Poptr1|648336,Poptr1|648348  
AT5G14460 Poptr1|549571  
Poptr1|585705  
Poptr1|64498,Poptr1|64452,Poptr1|697535  
AT5G13800  
Poptr1|568003  
AT4G04770,AT5G44316 Poptr1|546348  
AT2G44520 Poptr1|711442  
Poptr1|552841,Poptr1|572895  
AT1G27380  
AT5G16490 Poptr1|665574,Poptr1|703863  
AT2G30570 Poptr1|643207,Poptr1|651851  
Poptr1|576185  
AT3G10220 Poptr1|560410  
AT1G65320 Poptr1|596987,Poptr1|58948  
AT5G28840 Poptr1|742031,Poptr1|662916  
Poptr1|590002  
AT1G20840 Poptr1|550737,Poptr1|73193  
AT4G35300 Poptr1|556762,Poptr1|595017  
AT3G51490 Poptr1|558756  
AT3G57630 Poptr1|351560  
AT1G72070  
AT1G80920 Poptr1|61309,Poptr1|693204  
Poptr1|65891  
AT1G30680  
AT1G30660  
Poptr1|642615  
AT1G12530 Poptr1|350143  
AT1G56420 Poptr1|662610  
Poptr1|664149  
AT1G01220 Poptr1|664148,Poptr1|348114  
Poptr1|572424  
AT5G53330 Poptr1|569461,Poptr1|61230  
AT2G27230 Poptr1|558211,Poptr1|705894  
AT1G64625  
Poptr1|590003,Poptr1|576834,Poptr1|560809,Poptr1|548281,Poptr1|554540  
AT1G19485 Poptr1|560369,Poptr1|721032  
AT2G38680 Poptr1|583105,Poptr1|104612,Poptr1|567878  
AT1G73390,AT1G17940 Poptr1|647779,Poptr1|704988  
AT5G14020 Poptr1|65014  
AT5G23590 Poptr1|721640  
AT1G74830,AT1G18990 Poptr1|590807,Poptr1|575075,Poptr1|570021  
AT1G78800  
Poptr1|585767,Poptr1|583040  
AT3G27340 Poptr1|641729  
AT3G10630 Poptr1|563555  
AT3G14280 Poptr1|553823,Poptr1|584160  
AT2G01170Poptr1|345278,Poptr1|55248  
Poptr1|551408  
Poptr1|643572,Poptr1|643573,Poptr1|643571,Poptr1|564568  
Poptr1|558461,Poptr1|562518

AT5G66230,AT3G51230 Poptr1|584593,Poptr1|593847,Poptr1|646230  
AT3G09580 Poptr1|549551  
AT1G79830 Poptr1|548869,Poptr1|693690,Poptr1|640877  
AT1G70070 Poptr1|565219,Poptr1|565220,Poptr1|658366  
AT2G04560 Poptr1|573031  
AT5G66470 Poptr1|563187  
AT1G62640 Poptr1|554207,Poptr1|554208,Poptr1|581234  
Poptr1|584176  
Poptr1|680508  
AT3G06820,AT1G80210 Poptr1|709569  
AT4G28500  
AT5G56620 Poptr1|653319,Poptr1|582965  
AT4G29230 Poptr1|720167,Poptr1|582964  
AT1G28470 Poptr1|580954,Poptr1|545252  
Poptr1|718263,Poptr1|594624  
AT3G01600,AT5G14490 Poptr1|691582  
AT1G25580 Poptr1|566671  
AT2G45030,AT1G45332 Poptr1|554187,Poptr1|744106  
Poptr1|590610  
Poptr1|107985  
AT1G62750 Poptr1|711780  
Poptr1|108693  
AT1G55820,AT3G13222  
AT3G07660 Poptr1|664908,Poptr1|348514  
Poptr1|691845,Poptr1|568453  
Poptr1|108311  
AT5G47720 Poptr1|652350  
AT5G48230 Poptr1|664897  
AT1G52220 Poptr1|705739,Poptr1|645961  
AT2G46820 Poptr1|644663,Poptr1|572472  
Poptr1|575241  
Poptr1|664653  
AT2G19750,AT5G56670,AT4G29390 Poptr1|728731  
AT2G06510 Poptr1|672412  
Poptr1|672413  
Poptr1|590115,Poptr1|646356  
AT5G45400,AT4G19130  
AT5G08020,AT5G61000 Poptr1|60028  
AT5G10680,AT5G10720 Poptr1|578360,Poptr1|353075  
AT2G19910,AT2G19920,AT2G19930 Poptr1|591179  
Poptr1|587377  
Poptr1|562705  
Poptr1|584507,Poptr1|562707  
AT5G57660 Poptr1|690491,Poptr1|737847  
Poptr1|664500  
AT5G24930 Poptr1|578336,Poptr1|694947  
AT3G02380,AT5G15840,AT5G15850 Poptr1|714450,Poptr1|704129  
AT2G24790  
AT5G23990,AT5G23980 Poptr1|59634,Poptr1|556052  
AT5G50160 Poptr1|345956,Poptr1|575229  
Poptr1|545554,Poptr1|59633  
AT5G49740,AT5G49730 Poptr1|48637  
AT1G23020,AT1G01590,AT1G01580  
AT4G28240 Poptr1|663544,Poptr1|748518,Poptr1|574596  
Poptr1|568147  
AT4G04020,AT4G22240 Poptr1|677234,Poptr1|584733  
AT2G35490 Poptr1|693570,Poptr1|702944  
AT2G03690 Poptr1|659201,Poptr1|696672  
Poptr1|742349  
Poptr1|725646,Poptr1|565554,Poptr1|579897,Poptr1|587875,Poptr1|680703,Poptr1|596106,Poptr1|58776  
8,Poptr1|597459  
AT3G06810  
AT1G54140 Poptr1|584106,Poptr1|548570  
AT3G53860,AT2G31600,AT1G05860 Poptr1|580300,Poptr1|594485,Poptr1|75427,Poptr1|567175  
AT3G30775,AT5G38710 Poptr1|545677,Poptr1|704134  
AT4G05110,AT4G05120,AT4G05130,AT4G05140,AT1G61630  
Poptr1|55787,Poptr1|694040,Poptr1|544983,Poptr1|555474  
AT3G09990  
Poptr1|571814  
AT1G70330  
Poptr1|571813  
AT3G18940 Poptr1|649485,Poptr1|648550  
AT1G65295 Poptr1|665570  
AT5G01015 Poptr1|668274,Poptr1|676197  
AT2G47590 Poptr1|583223,Poptr1|692299  
AT3G26680 Poptr1|572818  
AT2G45700 Poptr1|561558  
Poptr1|714074  
Poptr1|669037,Poptr1|654129  
AT1G29250,AT2G34160  
AT3G04620  
AT1G43700 Poptr1|342366,Poptr1|651545



AT2G12940,AT2G13150,AT2G12900,AT2G21235,AT2G24340  
Poptr1|571661  
Poptr1|574111  
AT4G38900,AT2G21230 Poptr1|721834,Poptr1|713168  
AT1G06850 Poptr1|739018  
AT2G40620  
AT2G31370,AT1G06070 Poptr1|695765  
Poptr1|647351  
AT3G15590  
AT1G15480,AT1G80270 Poptr1|695593,Poptr1|667288  
AT1G07590 Poptr1|558074  
AT3G10140 Poptr1|716928,Poptr1|576372  
AT2G19490,AT3G32920 Poptr1|98318,Poptr1|717577  
Poptr1|582234  
AT1G79050 Poptr1|586875  
AT4G23660  
Poptr1|694374,Poptr1|71817  
Poptr1|661594  
AT5G28640 Poptr1|586807,Poptr1|571071  
AT5G60050 Poptr1|64444  
AT2G13690 Poptr1|562430,Poptr1|595375  
AT3G50780 Poptr1|71926,Poptr1|76227  
AT1G63850 Poptr1|48724,Poptr1|343647  
Poptr1|560379,Poptr1|667305  
Poptr1|555065  
AT2G41230  
AT3G59900,AT2G44080 Poptr1|673768,Poptr1|695708  
Poptr1|652891,Poptr1|678318  
AT1G64220,AT5G41685  
AT2G33220,AT1G04630  
Poptr1|712458,Poptr1|548007  
AT3G13410 Poptr1|595654,Poptr1|588082,Poptr1|593009,Poptr1|597265,Poptr1|62661  
AT5G12410 Poptr1|722978,Poptr1|549036  
Poptr1|585238  
AT1G03650 Poptr1|730471  
AT2G40030  
Poptr1|48505,Poptr1|555044  
AT1G63020 Poptr1|63613  
AT1G63900 Poptr1|572800  
AT1G59560  
Poptr1|580988  
AT5G48950  
AT1G48320 Poptr1|657784  
AT1G08450 Poptr1|562210,Poptr1|594551  
AT1G09210,AT1G56340 Poptr1|729430,Poptr1|744603  
Poptr1|702495  
Poptr1|559870,Poptr1|684659  
AT1G72680 Poptr1|699197  
Poptr1|550258  
Poptr1|579660,Poptr1|576047,Poptr1|351300,Poptr1|343883  
AT2G21890,AT2G21730,AT4G39330 Poptr1|549886  
AT4G37990,AT4G37980  
Poptr1|735177,Poptr1|653426,Poptr1|649951,Poptr1|649947,Poptr1|54645,Poptr1|587092,Poptr1|557762,  
Poptr1|549334,Poptr1|667694  
AT4G37970  
Poptr1|76057  
Poptr1|569971,Poptr1|49305  
AT3G19450,AT4G34230 Poptr1|649626  
Poptr1|587857,Poptr1|104862,Poptr1|576046  
AT4G26770  
AT4G22340,AT1G62430 Poptr1|584754  
AT4G39840 Poptr1|558545,Poptr1|562611  
AT3G18550  
AT1G68800 Poptr1|658950  
Poptr1|569857,Poptr1|574834  
Poptr1|580771  
AT4G34640,AT4G34650 Poptr1|686686,Poptr1|556526  
AT4G29250 Poptr1|701988  
Poptr1|593086,Poptr1|595436  
AT1G76060 Poptr1|550832  
Poptr1|64110  
AT3G48710,AT5G63550 Poptr1|356096,Poptr1|699359  
AT5G55660,AT4G26630 Poptr1|642304,Poptr1|568583  
AT5G64650,AT5G09770 Poptr1|654637,Poptr1|650590  
Poptr1|583535,Poptr1|571782  
AT2G20830  
Poptr1|60274  
AT5G25754,AT5G25757 Poptr1|344678,Poptr1|737022  
AT4G11120 Poptr1|732536  
AT5G45980  
AT2G28610  
AT2G01500

AT5G46010  
Poptr1|573986  
AT3G18010 Poptr1|666295,Poptr1|661686  
AT2G33880 Poptr1|586070  
AT5G17810,AT3G03660  
AT5G05770,AT3G11260 Poptr1|55494  
AT1G49870 Poptr1|649661  
AT5G56720 Poptr1|551995  
Poptr1|579707,Poptr1|597008,Poptr1|575002,Poptr1|591691,Poptr1|583815,Poptr1|550453,Poptr1|70990  
8,Poptr1|347805  
AT5G43330,AT1G04410 Poptr1|564942,Poptr1|747123  
AT3G20430 Poptr1|577884,Poptr1|352720  
AT4G27470 Poptr1|660967,Poptr1|670084  
AT2G23780 Poptr1|689730,Poptr1|686071  
AT1G19310 Poptr1|551914,Poptr1|740265  
AT1G74990  
AT4G28270,AT4G03510 Poptr1|670982,Poptr1|693929,Poptr1|743338,Poptr1|582702  
AT4G25290 Poptr1|734004  
AT4G29660  
Poptr1|661486  
Poptr1|561919  
Poptr1|654172,Poptr1|578231  
Poptr1|642651  
AT2G25320,AT2G25330 Poptr1|578230  
Poptr1|560568  
AT1G68910,AT5G11390 Poptr1|670811  
AT3G12010 Poptr1|561228  
AT2G45690 Poptr1|692423  
AT1G72550 Poptr1|730089,Poptr1|704600  
AT5G57700 Poptr1|561412,Poptr1|689144  
AT3G51010 Poptr1|696131  
AT5G63050 Poptr1|575196,Poptr1|570159  
Poptr1|63669,Poptr1|581572,Poptr1|357113,Poptr1|577472  
AT1G79740 Poptr1|345702  
AT5G33406  
AT1G43260  
AT3G22220 Poptr1|701256,Poptr1|344029  
Poptr1|594844,Poptr1|556939  
AT4G15020 Poptr1|108488  
AT1G36095 Poptr1|104901,Poptr1|545932,Poptr1|348152,Poptr1|355598,Poptr1|573336  
AT5G31412  
Poptr1|357108,Poptr1|100592,Poptr1|583894,Poptr1|102642,Poptr1|104265,Poptr1|569852,Poptr1|56109  
4,Poptr1|98788,Poptr1|103024,Poptr1|591588,Poptr1|581375,Poptr1|596194,Poptr1|578158,Poptr1|63668,Poptr1|545  
212,Poptr1|105279,Poptr1|642815,Poptr1|545949,Poptr1|574050,Poptr1|576979  
AT3G17450  
Poptr1|644917  
Poptr1|574051,Poptr1|572542  
AT3G13030,AT3G13020,AT3G13010 Poptr1|556885,Poptr1|563368  
Poptr1|97342  
Poptr1|655697  
Poptr1|102416,Poptr1|98307,Poptr1|355008,Poptr1|96974,Poptr1|72663,Poptr1|569760  
Poptr1|106154,Poptr1|65541,Poptr1|97930,Poptr1|355803,Poptr1|355802,Poptr1|65593,Poptr1|594565,P  
optr1|352511,Poptr1|568660,Poptr1|587574,Poptr1|99272,Poptr1|591007,Poptr1|561095,Poptr1|581730,Poptr1|59664  
6,Poptr1|596894,Poptr1|595849,Poptr1|583895,Poptr1|572737,Poptr1|586155,Poptr1|585135,Poptr1|579072,Poptr1|5  
81374,Poptr1|105592,Poptr1|591613,Poptr1|582225,Poptr1|580251,Poptr1|592983,Poptr1|64863  
AT1G54217 Poptr1|553537,Poptr1|742910  
AT5G57060,AT4G26060 Poptr1|736913,Poptr1|653256  
AT4G23840 Poptr1|63429  
AT3G59380 Poptr1|695776  
Poptr1|589302  
AT3G51430,AT3G51440,AT3G51450,AT3G51420 Poptr1|596617,Poptr1|558760,Poptr1|716127  
AT1G62730 Poptr1|581222  
AT3G57790 Poptr1|576311  
AT5G37850 Poptr1|555960,Poptr1|348791  
Poptr1|555963  
Poptr1|353461  
AT5G02790,AT5G02780 Poptr1|675943,Poptr1|576631  
AT3G55040  
AT1G16860,AT1G78880 Poptr1|567788,Poptr1|563449,Poptr1|563448,Poptr1|725259  
Poptr1|572440,Poptr1|348134  
Poptr1|568176,Poptr1|99368,Poptr1|568174  
Poptr1|72976,Poptr1|710116  
Poptr1|643048,Poptr1|694809  
AT5G18570 Poptr1|581753  
Poptr1|549175  
AT1G07620  
AT5G06550 Poptr1|576449,Poptr1|673125  
AT5G35520 Poptr1|596452  
Poptr1|590402  
AT5G66960 Poptr1|696055  
AT1G50380 Poptr1|718074  
AT1G69020

AT2G43310 Poptr1|679572,Poptr1|654471  
AT2G32970 Poptr1|552741,Poptr1|732312  
AT4G00390,AT1G61730,AT2G20805,AT4G00238,AT4G00250,AT1G44810,AT1G55950,AT2G01370,AT1G66420,AT4  
G00610,AT2G20613,AT1G11510,AT4G01260 Poptr1|550007,Poptr1|557514  
AT2G25720 Poptr1|647772  
AT2G19640 Poptr1|48616  
AT3G47510 Poptr1|564214,Poptr1|671324  
AT4G04850  
Poptr1|347953  
AT1G01790,AT4G00630  
AT4G00640 Poptr1|700210,Poptr1|347954  
Poptr1|108824  
AT5G24500 Poptr1|574662,Poptr1|569612  
AT3G47450  
Poptr1|590178  
AT1G78560 Poptr1|550354,Poptr1|690484  
AT2G26900 Poptr1|737536  
Poptr1|583528  
AT4G32250 Poptr1|561912,Poptr1|737225  
AT3G48195 Poptr1|570107  
AT4G19180 Poptr1|596878  
Poptr1|575198  
AT5G04590 Poptr1|691434,Poptr1|104659,Poptr1|557859  
Poptr1|104660  
AT5G63010 Poptr1|355944,Poptr1|671916  
AT4G12590 Poptr1|560160,Poptr1|667136  
AT3G61750  
Poptr1|348078  
AT4G17280,AT5G47530 Poptr1|695654,Poptr1|734515  
AT3G07390 Poptr1|553231  
AT4G12980,AT3G25290 Poptr1|684141  
AT3G07570  
AT5G35735 Poptr1|552698,Poptr1|573050  
AT5G48750,AT3G59070 Poptr1|59506,Poptr1|592424,Poptr1|582007,Poptr1|547792  
AT2G04850 Poptr1|342996,Poptr1|573047  
Poptr1|584704,Poptr1|563160  
AT4G39420 Poptr1|562736,Poptr1|71749  
AT5G47090 Poptr1|356543  
AT5G50010 Poptr1|551633,Poptr1|72233  
AT1G34570,AT3G15750 Poptr1|547848  
AT1G49820 Poptr1|65237,Poptr1|722323  
AT4G10650 Poptr1|570113  
AT2G41670 Poptr1|344138  
Poptr1|353966  
AT3G62240,AT2G47090  
Poptr1|552589,Poptr1|572550,Poptr1|581617  
AT3G06580 Poptr1|686369,Poptr1|723945  
Poptr1|108899,Poptr1|585578  
AT5G10860 Poptr1|673753,Poptr1|571952  
Poptr1|559736,Poptr1|551006  
AT2G01350 Poptr1|566508,Poptr1|686308  
AT5G25480 Poptr1|561861  
AT1G78690 Poptr1|56050  
AT4G14180 Poptr1|552834  
AT3G27970,AT5G40310 Poptr1|58347  
AT2G48100 Poptr1|596656,Poptr1|552663  
AT3G15080 Poptr1|684054  
AT4G27700 Poptr1|700772,Poptr1|700773,Poptr1|569609  
AT1G67040 Poptr1|580811,Poptr1|555864  
AT1G07060 Poptr1|641526  
Poptr1|585713  
AT3G28460 Poptr1|579203,Poptr1|691550  
AT1G61760  
AT4G05220 Poptr1|544878,Poptr1|568221  
Poptr1|593483,Poptr1|571165,Poptr1|594315,Poptr1|106517,Poptr1|573882,Poptr1|573883  
AT3G04080,AT5G18280 Poptr1|729946  
Poptr1|567683,Poptr1|563671,Poptr1|563670  
AT4G22010 Poptr1|588573  
AT4G37160,AT2G23630 Poptr1|53328  
Poptr1|556695  
AT5G48450 Poptr1|573208  
AT1G76160,AT1G41830 Poptr1|710957,Poptr1|559908  
AT5G66920 Poptr1|719331  
AT1G21860,AT1G21850  
AT4G12420 Poptr1|646462,Poptr1|704255  
AT5G51480,AT4G25240 Poptr1|104545,Poptr1|575660,Poptr1|570599  
AT4G38420,AT4G28090  
AT3G13390,AT1G55570,AT3G13400,AT1G55560 Poptr1|547564,Poptr1|555163,Poptr1|547563  
AT1G75790 Poptr1|550874  
Poptr1|348614  
AT3G49320 Poptr1|574696  
Poptr1|684832

AT5G41970  
Poptr1|580213,Poptr1|561063,Poptr1|589387,Poptr1|593465  
AT2G07785 Poptr1|592099,Poptr1|747653  
Poptr1|748946,Poptr1|748815  
AT1G49410 Poptr1|649478,Poptr1|556420  
AT5G01730,AT2G38440 Poptr1|653178,Poptr1|577102  
AT1G13690 Poptr1|659197,Poptr1|686382  
AT5G51920 Poptr1|575763  
AT4G37100,AT2G23520 Poptr1|71946,Poptr1|53334  
AT4G22980  
AT5G66950  
Poptr1|343598,Poptr1|640560  
AT2G24300,AT4G31000 Poptr1|58759,Poptr1|344475,Poptr1|108125  
Poptr1|545010  
AT5G62570 Poptr1|570054,Poptr1|570056,Poptr1|733232  
Poptr1|591347,Poptr1|568295,Poptr1|555504,Poptr1|568296  
AT4G25800,AT5G57580  
Poptr1|355122  
AT1G73800 Poptr1|591348  
AT2G18750 Poptr1|702186  
AT1G73805  
AT5G26920 Poptr1|699701,Poptr1|581935  
Poptr1|574923,Poptr1|699504  
AT5G58720 Poptr1|557922  
Poptr1|557923  
AT3G15390 Poptr1|545311,Poptr1|580890,Poptr1|579484  
Poptr1|733017  
AT3G29420  
AT2G18620 Poptr1|741259,Poptr1|563096  
AT2G23800,AT2G18640,AT1G49530,AT3G20160  
AT4G38460 Poptr1|648837,Poptr1|721619  
AT3G29430,AT3G32040,AT3G14530,AT3G14550,AT3G14510  
Poptr1|582252  
AT4G36810  
Poptr1|545427,Poptr1|348834,Poptr1|645278  
AT2G24590,AT4G31580 Poptr1|578368,Poptr1|583120,Poptr1|583122  
AT1G23860  
AT2G18340,AT4G36600  
Poptr1|562688  
AT2G42560 Poptr1|574347  
AT3G53040 Poptr1|97446  
AT4G21020,AT5G44310 Poptr1|693945  
AT3G15280  
AT3G17520 Poptr1|548610,Poptr1|697783  
AT5G51840 Poptr1|570534,Poptr1|57782,Poptr1|570535,Poptr1|570536  
AT5G41390 Poptr1|640460,Poptr1|646651  
Poptr1|644488,Poptr1|664003  
Poptr1|664004,Poptr1|644489,Poptr1|640459  
AT1G63830  
AT4G23470  
AT3G24060 Poptr1|63100,Poptr1|554814,Poptr1|555006,Poptr1|547994  
AT4G33740 Poptr1|550046,Poptr1|557557  
AT2G12875 Poptr1|354528  
Poptr1|641640  
Poptr1|551731  
AT5G40450  
AT3G05900  
AT1G76780  
Poptr1|104207  
AT4G37820,AT2G22795 Poptr1|563322  
AT3G07800 Poptr1|562415,Poptr1|645014  
Poptr1|351230,Poptr1|57849,Poptr1|554699  
AT5G23070  
Poptr1|562414  
AT1G11190 Poptr1|55771  
AT4G21590,AT4G21600,AT4G21585 Poptr1|698888  
AT1G68290  
AT1G65280 Poptr1|574282  
Poptr1|592233  
AT5G65180,AT5G10060 Poptr1|558582,Poptr1|558584,Poptr1|53204  
AT3G26990 Poptr1|641847  
AT1G16970 Poptr1|589384,Poptr1|106011,Poptr1|699057  
AT1G07840 Poptr1|651172  
AT3G57060 Poptr1|560411  
AT1G62280 Poptr1|568054  
AT5G24030 Poptr1|670692  
AT1G12480 Poptr1|548556  
Poptr1|580580,Poptr1|661423  
Poptr1|584691,Poptr1|552770  
Poptr1|567056  
AT4G27970  
AT4G22360 Poptr1|575945,Poptr1|351183

AT1G11400Poptr1|648020,Poptr1|553455  
Poptr1|711808,Poptr1|691251  
AT3G27930 Poptr1|683905  
AT5G01990 Poptr1|589605,Poptr1|577230  
AT1G71090 Poptr1|564590,Poptr1|566524  
Poptr1|590687,Poptr1|348855,Poptr1|545403  
AT1G14710 Poptr1|720808  
AT2G36230 Poptr1|553007,Poptr1|545428  
AT5G28060,AT3G04920 Poptr1|703642,Poptr1|570983,Poptr1|720898,Poptr1|47264  
AT4G13220 Poptr1|553252  
Poptr1|640765  
AT5G13340 Poptr1|595355,Poptr1|579985,Poptr1|65183  
AT4G18040 Poptr1|660574  
Poptr1|565813,Poptr1|696355  
AT5G35620  
AT1G29590,AT1G29550  
AT5G18110Poptr1|571197  
AT4G30820 Poptr1|653618,Poptr1|669544  
Poptr1|551207,Poptr1|685351  
AT1G06670,AT2G30800  
AT1G48650 Poptr1|700840  
AT2G01130Poptr1|698212  
AT2G35920 Poptr1|576491  
Poptr1|742486  
Poptr1|681012,Poptr1|656864  
AT1G58050,AT1G58060  
AT5G04895 Poptr1|567857,Poptr1|563521  
Poptr1|656865  
AT5G07450,AT5G61650  
AT3G05327  
AT3G63120 Poptr1|714972,Poptr1|643309  
AT3G21870 Poptr1|562309  
AT2G44740 Poptr1|575520,Poptr1|746980,Poptr1|591757  
AT3G60550,AT2G45080 Poptr1|572073,Poptr1|692445  
AT5G01470 Poptr1|560908  
AT1G59710  
AT3G01311  
AT1G27100,AT1G69890 Poptr1|565238,Poptr1|565414  
AT3G28630 Poptr1|577559,Poptr1|587022,Poptr1|545779  
Poptr1|577558,Poptr1|587023,Poptr1|545780  
AT1G69900 Poptr1|657568,Poptr1|565413  
AT1G67920,AT1G24600 Poptr1|566445,Poptr1|566447,Poptr1|564662  
AT3G13550 Poptr1|48678  
AT4G27960  
Poptr1|59421  
AT2G46030  
Poptr1|98102,Poptr1|708193  
AT5G05080 Poptr1|716742,Poptr1|734663  
Poptr1|591149,Poptr1|674243,Poptr1|677884,Poptr1|684416,Poptr1|105369  
AT5G53300  
Poptr1|572278,Poptr1|347989,Poptr1|584236,Poptr1|683679,Poptr1|646645  
AT5G41700 Poptr1|734368,Poptr1|738992  
AT5G25760 Poptr1|654010,Poptr1|683083  
AT2G16740  
Poptr1|651102  
AT1G78870,AT1G16890 Poptr1|583035,Poptr1|568821  
AT3G24515 Poptr1|747349  
AT3G20060,AT1G50490 Poptr1|691341,Poptr1|557890  
AT5G50870 Poptr1|666735,Poptr1|662201  
AT5G41340,AT1G63800  
Poptr1|590984  
Poptr1|574283  
Poptr1|586577,Poptr1|661451,Poptr1|640393,Poptr1|693395,Poptr1|561006  
AT2G18600 Poptr1|719430,Poptr1|703429,Poptr1|697294  
AT3G55380 Poptr1|659697,Poptr1|696872,Poptr1|696873,Poptr1|659699  
AT2G02760,AT1G14400 Poptr1|702453,Poptr1|730050,Poptr1|744130  
AT2G32790  
Poptr1|659853,Poptr1|655925  
Poptr1|56911  
Poptr1|700914  
AT3G57870  
AT5G59300  
AT5G56150  
AT4G36800 Poptr1|551921  
AT3G08700  
AT3G46460  
AT1G64230  
AT5G62540  
Poptr1|556640  
AT3G08690  
AT1G36340 Poptr1|354296

Poptr1|577424  
AT5G05920 Poptr1|676237,Poptr1|684730,Poptr1|639751  
Poptr1|591091  
AT1G57770 Poptr1|583501  
AT4G33100 Poptr1|561621  
AT3G12210 Poptr1|684431  
Poptr1|655739,Poptr1|660146  
AT5G04750  
AT4G01690 Poptr1|348445,Poptr1|57141  
Poptr1|64117  
AT2G26660  
AT5G15330 Poptr1|701847  
Poptr1|585368,Poptr1|106256  
Poptr1|561890,Poptr1|702011  
AT5G20150 Poptr1|717404,Poptr1|689185  
AT2G45130 Poptr1|107450,Poptr1|740087,Poptr1|552014  
AT1G13330 Poptr1|564514  
AT4G17010 Poptr1|569409  
AT1G10155,AT1G31200  
Poptr1|587951,Poptr1|705053,Poptr1|575600,Poptr1|563647,Poptr1|747859,Poptr1|580056,Poptr1|58675  
4,Poptr1|575601  
AT2G37990 Poptr1|559764  
AT1G50050,AT1G50060 Poptr1|54561  
AT4G33730  
AT4G30320 Poptr1|578630  
Poptr1|352549  
AT4G25780 Poptr1|578632  
AT4G33720  
AT4G33710,AT5G26130,AT4G07820  
AT5G02730,AT3G09590,AT1G01310  
AT5G57625,AT4G25790  
AT5G66590 Poptr1|558812,Poptr1|563075  
AT4G31470 Poptr1|578386  
AT2G14580,AT2G14610  
Poptr1|581980,Poptr1|748543,Poptr1|649730,Poptr1|649729,Poptr1|550049,Poptr1|595857,Poptr1|59585  
5,Poptr1|707470  
AT2G19980,AT2G19970,AT2G19990  
Poptr1|54565,Poptr1|579850  
AT3G19690  
Poptr1|553180,Poptr1|645427  
AT2G34470  
AT1G24270  
AT1G12020 Poptr1|660322  
AT5G13090 Poptr1|575387,Poptr1|570294,Poptr1|684791,Poptr1|48585  
AT1G06820 Poptr1|561180  
AT1G51650 Poptr1|563472,Poptr1|567814  
AT5G01260 Poptr1|64277,Poptr1|695384  
AT3G57930,AT2G42190 Poptr1|547911  
Poptr1|658024,Poptr1|719841  
Poptr1|710346  
AT3G25400  
Poptr1|664667,Poptr1|553082  
AT5G62790 Poptr1|733322,Poptr1|728585  
AT4G16600,AT2G35710 Poptr1|676387,Poptr1|646104  
Poptr1|553870,Poptr1|676386  
AT1G78010 Poptr1|551541  
AT3G01860  
Poptr1|354664,Poptr1|565883,Poptr1|691633  
AT5G40860,AT3G27210 Poptr1|570240  
Poptr1|562024,Poptr1|737430  
AT5G25780,AT5G27640,AT1G49015  
AT4G33945  
Poptr1|594213,Poptr1|594377,Poptr1|568672,Poptr1|690176  
AT4G30840 Poptr1|561365  
AT4G00100,AT3G60770 Poptr1|666912,Poptr1|662449,Poptr1|552039,Poptr1|663801  
AT1G31860 Poptr1|745221  
AT5G10830,AT4G22530 Poptr1|718621  
Poptr1|592575,Poptr1|562508,Poptr1|71560,Poptr1|562491,Poptr1|558440,Poptr1|562492  
AT2G41380 Poptr1|695580,Poptr1|701330,Poptr1|560418  
AT1G55450,AT3G54150,AT3G61210  
AT1G32370 Poptr1|589976  
AT3G11740,AT5G01750,AT2G14560,AT1G33840,AT3G16900  
AT3G56180 Poptr1|564095,Poptr1|567198  
Poptr1|681715  
AT2G30270 Poptr1|574514  
Poptr1|577130,Poptr1|577114,Poptr1|680614,Poptr1|577132,Poptr1|734260,Poptr1|577128,Poptr1|57711  
7,Poptr1|577126,Poptr1|668152,Poptr1|577129  
AT5G52110Poptr1|701167  
AT5G53930 Poptr1|660905,Poptr1|579430  
AT1G46480 Poptr1|711025,Poptr1|591986  
AT5G59340 Poptr1|64407,Poptr1|558091  
Poptr1|656212

AT2G17950 Poptr1|587553,Poptr1|655458,Poptr1|689700  
AT4G32105,AT4G32110,AT4G32100 Poptr1|578245,Poptr1|352957  
AT1G31812 Poptr1|674050  
Poptr1|646371,Poptr1|739977  
AT4G27500 Poptr1|107073,Poptr1|579456,Poptr1|699096  
AT1G20970 Poptr1|582719,Poptr1|561264  
AT5G17360 Poptr1|558316  
AT1G66730 Poptr1|648065,Poptr1|648067  
AT1G08130,AT1G49250 Poptr1|697754  
AT5G11470Poptr1|578120,Poptr1|561798  
AT3G15605 Poptr1|548624  
AT4G15790 Poptr1|99050  
AT5G19180 Poptr1|345609  
AT4G34180,AT1G44542,AT4G35220 Poptr1|722277,Poptr1|580311,Poptr1|649605,Poptr1|707344,Poptr1|691740,Poptr1|593174,Poptr1|65216  
Poptr1|649604  
AT3G11940,AT2G37270 Poptr1|561203,Poptr1|576427  
AT3G10920 Poptr1|574107,Poptr1|571649  
AT3G56350  
AT5G35090,AT5G11070 Poptr1|553806,Poptr1|654193,Poptr1|349628  
AT5G09820 Poptr1|65148  
AT1G32585,AT1G32610,AT2G35230 Poptr1|590009  
AT5G50810 Poptr1|662195,Poptr1|575412  
AT4G09000,AT1G35160,AT1G78300 Poptr1|559069,Poptr1|551603  
AT2G42590 Poptr1|568816,Poptr1|672511  
AT2G10450 Poptr1|577955  
AT3G02520,AT5G16050,AT5G38480 Poptr1|670888  
AT5G10450,AT5G65430 Poptr1|643848,Poptr1|682144  
Poptr1|576897,Poptr1|559174  
AT1G22290,AT1G22300,AT1G78220  
Poptr1|346316  
AT1G34760 Poptr1|651278,Poptr1|684476  
AT1G26480 Poptr1|656511,Poptr1|698372  
AT3G54570 Poptr1|350835,Poptr1|547847  
AT5G13520 Poptr1|720268,Poptr1|55574  
Poptr1|104198,Poptr1|354886  
Poptr1|354890,Poptr1|104199  
AT5G18890,AT5G18860  
AT5G18870 Poptr1|570906,Poptr1|584785  
AT3G47860 Poptr1|730366  
AT5G64380 Poptr1|577299  
AT3G54050 Poptr1|597428,Poptr1|735683,Poptr1|653063  
Poptr1|560856,Poptr1|701575  
AT1G43670 Poptr1|643486,Poptr1|651552  
Poptr1|584602  
Poptr1|582871,Poptr1|591294,Poptr1|592415,Poptr1|587181  
AT5G04550 Poptr1|344868  
Poptr1|587560  
AT3G23160  
AT5G51670 Poptr1|666929,Poptr1|570566  
Poptr1|75944,Poptr1|71794,Poptr1|672070  
AT5G08280  
AT5G14950 Poptr1|564498,Poptr1|577532,Poptr1|549487  
AT2G34020,AT2G34030,AT1G29020 Poptr1|545221  
AT1G53210 Poptr1|684057  
Poptr1|65573,Poptr1|103245  
AT2G22080 Poptr1|580934  
AT3G50550  
AT2G11910 Poptr1|654180,Poptr1|694972,Poptr1|578246  
AT3G15357 Poptr1|729093  
Poptr1|694338  
Poptr1|675212  
AT1G51720 Poptr1|64121,Poptr1|60165  
AT1G07780,AT5G05590,AT1G29410  
Poptr1|100123,Poptr1|103582,Poptr1|573295,Poptr1|728534,Poptr1|564037  
AT1G04710,AT2G33150 Poptr1|63086  
Poptr1|589775  
AT5G48880  
Poptr1|584349,Poptr1|588399  
Poptr1|692211  
Poptr1|596237  
AT5G02240  
AT2G37660 Poptr1|560773  
AT1G79500,AT1G16340 Poptr1|694651,Poptr1|551267  
AT5G26610 Poptr1|581599,Poptr1|570654  
AT3G19970 Poptr1|75889,Poptr1|654944,Poptr1|51767  
AT2G18245 Poptr1|696108  
Poptr1|352998,Poptr1|352995

Poptr1|597381,Poptr1|104639,Poptr1|578788,Poptr1|669634  
AT4G19820,AT4G19810,AT4G19740,AT4G19720,AT4G19730,AT4G19750,AT4G19760,AT4G19770,AT4G19800  
Poptr1|104902,Poptr1|561291,Poptr1|717157  
Poptr1|64860  
AT5G63150 Poptr1|355979  
AT1G09780,AT3G08590  
Poptr1|587025,Poptr1|688883,Poptr1|589594  
AT5G67050 Poptr1|696027  
AT5G42930,AT1G56630,AT1G45201  
Poptr1|591962,Poptr1|703127,Poptr1|591966,Poptr1|551846,Poptr1|703126  
AT3G14360 Poptr1|349701,Poptr1|346159  
Poptr1|72005  
AT1G20570,AT1G80260 Poptr1|555587,Poptr1|582348  
Poptr1|667616  
AT5G06360 Poptr1|667614,Poptr1|653375  
AT1G15190 Poptr1|579988,Poptr1|65177  
Poptr1|559706  
AT3G23280,AT4G14365 Poptr1|580193,Poptr1|580194,Poptr1|721099  
Poptr1|559705  
AT2G26140 Poptr1|344620  
AT1G53780  
AT1G45000,AT5G43010 Poptr1|694177,Poptr1|697253,Poptr1|643066,Poptr1|685410  
Poptr1|108296,Poptr1|580440,Poptr1|108243  
AT1G07510,AT2G29080 Poptr1|723227  
Poptr1|592443  
Poptr1|597463  
Poptr1|701550  
AT3G05530 Poptr1|581882,Poptr1|570788  
Poptr1|715606,Poptr1|550790  
AT1G09100  
AT3G02450 Poptr1|556179  
AT3G04340  
Poptr1|99351,Poptr1|71493  
Poptr1|561128  
AT5G58290 Poptr1|734677,Poptr1|560313  
Poptr1|662998,Poptr1|593482  
Poptr1|589827  
AT4G04180 Poptr1|99350  
AT5G64580  
AT4G23940 Poptr1|63410  
Poptr1|577919  
AT1G06430,AT2G30950 Poptr1|690615,Poptr1|552657,Poptr1|747188,Poptr1|572817  
AT5G20000,AT5G19990 Poptr1|55173,Poptr1|564750  
AT1G79560  
AT1G53750  
AT3G15120  
Poptr1|586728  
AT3G16290 Poptr1|553755  
Poptr1|591333,Poptr1|560312  
AT5G53170 Poptr1|355222  
Poptr1|99352,Poptr1|662999,Poptr1|591340  
AT1G50250,AT5G42270  
AT5G58870,AT3G47060 Poptr1|557956,Poptr1|64293  
AT5G15250 Poptr1|577650  
AT2G20140,AT4G29040 Poptr1|665101,Poptr1|553258  
Poptr1|577920,Poptr1|685597  
AT4G39100 Poptr1|697250,Poptr1|556513  
AT4G04260,AT4G22140 Poptr1|687469,Poptr1|690469  
Poptr1|583591,Poptr1|580851,Poptr1|645061,Poptr1|573000  
AT4G40045 Poptr1|563630  
AT2G20635  
AT2G33560 Poptr1|684695,Poptr1|694931  
AT1G13020,AT3G26400 Poptr1|697968,Poptr1|354768  
AT4G38710  
Poptr1|552502  
AT5G02090,AT2G37750 Poptr1|560811,Poptr1|576835  
AT1G78430,AT1G17140 Poptr1|684060  
AT2G45330,AT5G23600 Poptr1|663425,Poptr1|551766  
AT1G29990 Poptr1|714511  
Poptr1|559385,Poptr1|347117  
AT3G49070 Poptr1|575854  
AT1G20180 Poptr1|346657,Poptr1|559872  
AT3G23410 Poptr1|597348,Poptr1|686215  
Poptr1|567586  
AT4G28570  
Poptr1|553335  
AT4G19380  
AT1G03990  
AT3G48070,AT5G62910 Poptr1|687785,Poptr1|666395  
AT1G74870  
AT5G67490 Poptr1|732920  
AT4G39690 Poptr1|558579,Poptr1|75769



AT3G49080 Poptr1|662307  
AT4G38390  
AT5G01100  
AT1G20550,AT1G76270 Poptr1|342122,Poptr1|52260  
AT2G37980,AT3G54100 Poptr1|560864  
AT1G52630 Poptr1|63691,Poptr1|349477  
AT3G26370 Poptr1|108207,Poptr1|686197,Poptr1|697966  
AT1G35510 Poptr1|59000  
AT1G29200 Poptr1|647853,Poptr1|728166  
AT1G22460 Poptr1|347420,Poptr1|559064  
AT3G03810  
Poptr1|700820,Poptr1|729137  
AT5G35570 Poptr1|702660  
AT1G62330,AT1G11990 Poptr1|584715,Poptr1|568088  
AT5G63390 Poptr1|575321  
AT2G03280,AT1G14020 Poptr1|656470,Poptr1|724141  
Poptr1|570231,Poptr1|571187  
AT3G02250,AT5G15740 Poptr1|584629,Poptr1|583872  
AT4G24530  
Poptr1|588139,Poptr1|551659  
AT3G07900  
AT2G44500 Poptr1|723398,Poptr1|583251  
Poptr1|585841  
AT4G16650 Poptr1|349738,Poptr1|739867  
AT1G04910 Poptr1|703871,Poptr1|65076  
Poptr1|571188,Poptr1|705607  
AT2G01480,AT1G14970 Poptr1|354258,Poptr1|55219  
AT5G64600 Poptr1|595367  
AT1G38065,AT1G38131 Poptr1|72424,Poptr1|710824  
Poptr1|664728,Poptr1|546314  
AT5G65470 Poptr1|563296  
AT3G30300 Poptr1|585784,Poptr1|98855,Poptr1|746118  
AT5G54150,AT4G27660 Poptr1|666035,Poptr1|661630  
Poptr1|549527  
AT5G23240  
AT3G46180,AT5G59740 Poptr1|64436  
AT1G52230,AT3G16140 Poptr1|693693  
AT5G13450  
Poptr1|697500  
AT3G52070 Poptr1|557794  
AT1G33270 Poptr1|712254,Poptr1|548763  
AT1G04970 Poptr1|573035  
AT3G20270 Poptr1|655640,Poptr1|65421  
Poptr1|655639  
Poptr1|49366  
AT2G39550 Poptr1|696867  
Poptr1|652748  
AT3G29170  
Poptr1|576340  
AT1G58180 Poptr1|716403  
AT1G23730,AT1G70410  
AT3G01500 Poptr1|706713  
AT4G33580 Poptr1|654589,Poptr1|577325  
Poptr1|354809,Poptr1|682561  
Poptr1|570088  
Poptr1|666464,Poptr1|575155,Poptr1|679362,Poptr1|591547  
AT5G14740  
Poptr1|597587,Poptr1|654588,Poptr1|736026  
AT5G42660 Poptr1|692427  
AT1G28240 Poptr1|580911,Poptr1|713946  
AT4G09630,AT1G34550 Poptr1|59522,Poptr1|59017,Poptr1|107425  
Poptr1|566310  
AT1G53040 Poptr1|568898,Poptr1|579463  
AT5G46220  
AT2G02910  
AT4G38500 Poptr1|546264  
AT4G12130 Poptr1|671186,Poptr1|671185,Poptr1|583089,Poptr1|671187,Poptr1|656015  
AT1G55250 Poptr1|639674  
Poptr1|708312  
AT1G55255  
AT2G44950 Poptr1|347800,Poptr1|740134  
AT4G33910 Poptr1|722373  
AT3G28490,AT3G28480 Poptr1|577548  
AT5G66060 Poptr1|585678,Poptr1|593788  
Poptr1|577550  
AT2G23096  
AT1G20270 Poptr1|550833,Poptr1|52240  
Poptr1|565695  
AT4G35810,AT2G17720  
AT3G06300,AT5G18900 Poptr1|565697,Poptr1|696274  
Poptr1|341617  
AT2G43080 Poptr1|684206

AT4G25600 Poptr1|356221  
AT4G35820  
AT4G24840 Poptr1|346008,Poptr1|57667  
AT2G21150Poptr1|697212,Poptr1|648739  
AT1G54780 Poptr1|595551,Poptr1|570885  
Poptr1|345369  
Poptr1|351174  
AT3G51970 Poptr1|734540,Poptr1|54666  
AT5G55350,AT5G55360,AT5G55340,AT5G51420,AT5G55330,AT1G34500,AT1G34520,AT1G34490,AT5G55320,AT5  
G55370,AT5G55380  
Poptr1|560145,Poptr1|575959,Poptr1|344003,Poptr1|63567  
Poptr1|64448,Poptr1|64457,Poptr1|549263  
AT4G02220 Poptr1|684269  
AT1G52180  
AT1G73190,AT1G17810 Poptr1|690449,Poptr1|99886  
Poptr1|704832,Poptr1|558321  
AT4G01470 Poptr1|567479,Poptr1|563850  
AT3G47440 Poptr1|346320,Poptr1|350040  
AT4G17340,AT5G47450 Poptr1|646117,Poptr1|589870  
AT2G25810 Poptr1|561759  
AT2G36830,AT3G26520  
Poptr1|549212,Poptr1|697670  
AT3G16240 Poptr1|680648,Poptr1|640897,Poptr1|645978  
Poptr1|576791,Poptr1|702770,Poptr1|562841  
AT5G61900,AT5G07300 Poptr1|699340,Poptr1|733789,Poptr1|107069  
AT1G08860 Poptr1|570912  
AT3G05010,AT5G27210 Poptr1|595509,Poptr1|729729  
Poptr1|597225,Poptr1|594832  
Poptr1|747700  
Poptr1|552346  
Poptr1|677440,Poptr1|678859,Poptr1|568840  
AT2G28105 Poptr1|584442  
AT4G04320 Poptr1|584713  
Poptr1|746162  
Poptr1|646053,Poptr1|646054  
AT1G34260 Poptr1|740631,Poptr1|702568  
AT3G14270 Poptr1|646052,Poptr1|704808  
AT1G71010 Poptr1|726898,Poptr1|345299  
AT4G33240  
AT4G24110Poptr1|350423,Poptr1|548245  
AT3G44890 Poptr1|558328,Poptr1|584454  
AT4G15840 Poptr1|697828  
Poptr1|593626,Poptr1|587319  
AT4G11280Poptr1|104603,Poptr1|350274,Poptr1|640442  
AT1G01480  
AT5G51690 Poptr1|575708  
AT2G22810,AT4G37770  
Poptr1|684328  
AT1G62960 Poptr1|554269  
AT4G26200 Poptr1|344379,Poptr1|98306  
AT5G28360 Poptr1|570563  
AT3G61510  
AT4G08040 Poptr1|551742  
AT5G65800,AT3G49700 Poptr1|53455  
AT1G33910,AT1G33900,AT1G33930,AT1G33890,AT1G33830,AT2G26820,AT1G33870,AT1G33880,AT1G33960,AT1  
G33950,AT2G34315,AT5G47270,AT4G09930,AT4G09940,AT4G09950  
AT1G33970 Poptr1|665703,Poptr1|740763  
AT1G20520,AT1G76210 Poptr1|346606,Poptr1|559919  
AT2G17070,AT2G17080,AT4G35210,AT4G35200  
Poptr1|54348,Poptr1|556711,Poptr1|556714,Poptr1|557005,Poptr1|556712,Poptr1|557004,Poptr1|546309,  
Poptr1|546308  
AT1G76220 Poptr1|107050,Poptr1|346604,Poptr1|346602,Poptr1|559921,Poptr1|346601,Poptr1|559922  
AT3G51400,AT4G35720  
AT3G51410 Poptr1|349887,Poptr1|558802  
AT4G35710,AT4G35690,AT2G17680  
Poptr1|593758,Poptr1|71916,Poptr1|596256,Poptr1|71915,Poptr1|593759  
AT4G35660  
AT1G48770,AT3G18295 Poptr1|569808  
AT1G25370,AT1G68340 Poptr1|566601  
AT4G17440 Poptr1|591803,Poptr1|591802  
AT1G79850 Poptr1|705735  
Poptr1|652362,Poptr1|57837  
AT4G25434 Poptr1|642311  
AT2G04440,AT2G04430,AT2G04450,AT4G12720  
AT5G47650  
Poptr1|589896,Poptr1|693625  
Poptr1|739941,Poptr1|343535,Poptr1|715919,Poptr1|573112  
AT5G47240 Poptr1|582970  
AT5G25220,AT5G11060  
AT1G62990 Poptr1|691170  
AT4G32040 Poptr1|738080,Poptr1|653520,Poptr1|672778  
Poptr1|352975,Poptr1|689058

Poptr1|584980,Poptr1|102026,Poptr1|558222,Poptr1|556219,Poptr1|562640,Poptr1|578060,Poptr1|58814  
8,Poptr1|577397,Poptr1|558220,Poptr1|558221  
Poptr1|583981  
Poptr1|556262  
Poptr1|678345  
Poptr1|588419  
Poptr1|666413,Poptr1|682778  
AT4G09600,AT4G09610  
Poptr1|715453,Poptr1|346697,Poptr1|550887  
AT1G22690 Poptr1|574284  
Poptr1|592232  
Poptr1|48955  
Poptr1|689595  
AT2G14900 Poptr1|549969,Poptr1|649651  
Poptr1|674821  
AT1G74670  
AT2G18420,AT1G75750 Poptr1|642965,Poptr1|652064  
AT3G02885 Poptr1|553013  
Poptr1|652062  
Poptr1|560438  
AT5G15230 Poptr1|577634  
AT2G30810  
AT5G59845,AT2G39540  
AT1G04730 Poptr1|48557  
AT1G69810  
Poptr1|63892  
Poptr1|348620,Poptr1|732261  
AT4G22070,AT4G04450 Poptr1|568057,Poptr1|584695  
AT4G01720 Poptr1|552620,Poptr1|572520  
AT1G62300  
Poptr1|581356  
AT1G18860,AT5G15130  
AT5G21040 Poptr1|556865  
AT4G24130 Poptr1|640272,Poptr1|712665  
AT5G49600 Poptr1|566870  
AT1G56580,AT1G09310 Poptr1|570697,Poptr1|581672  
AT1G30020  
AT5G46230 Poptr1|647799  
Poptr1|674022,Poptr1|648157,Poptr1|552919,Poptr1|592397,Poptr1|545188  
AT5G43490,AT5G48610  
Poptr1|65056,Poptr1|597065,Poptr1|691688  
AT3G54880  
AT1G15350  
AT5G25360 Poptr1|654141,Poptr1|578207  
AT5G03440  
Poptr1|695507,Poptr1|578946  
Poptr1|691307  
Poptr1|567666,Poptr1|563695  
AT3G15770  
Poptr1|567157,Poptr1|564127  
AT2G31810 Poptr1|562116  
AT5G16290 Poptr1|567156  
AT2G07170 Poptr1|351716  
Poptr1|99230,Poptr1|569108  
AT5G62580 Poptr1|65283,Poptr1|570031,Poptr1|688477  
AT1G27210,AT1G59850 Poptr1|354832  
AT1G50890,AT4G27060 Poptr1|569109,Poptr1|730372  
AT2G40690 Poptr1|56840  
AT5G25040,AT5G25050 Poptr1|562010,Poptr1|578302  
AT5G10820 Poptr1|344774  
AT1G79710 Poptr1|554911,Poptr1|62790  
AT5G46420 Poptr1|705089  
Poptr1|56915  
AT2G38610 Poptr1|577223,Poptr1|739780  
AT1G09660 Poptr1|596753,Poptr1|690367  
AT4G26480,AT5G56140 Poptr1|672144,Poptr1|642696  
AT3G08620  
AT4G33140 Poptr1|561540  
AT4G10930  
AT4G10940 Poptr1|63411  
AT1G35340  
Poptr1|574230  
Poptr1|597054,Poptr1|65072  
AT4G22330 Poptr1|105543,Poptr1|568183,Poptr1|584753  
Poptr1|654154,Poptr1|587853,Poptr1|578215,Poptr1|717899  
AT3G19720  
AT1G53310,AT3G14940 Poptr1|745223,Poptr1|687583  
AT3G42628  
AT2G42600  
Poptr1|564469,Poptr1|658961  
Poptr1|582814,Poptr1|589017  
Poptr1|572845

Poptr1|552645  
 AT1G68750 Poptr1|658962,Poptr1|564468  
 AT5G02250 Poptr1|685742  
 AT1G09700 Poptr1|558990  
 AT5G16950 Poptr1|548239  
 AT5G41320 Poptr1|350236,Poptr1|548454  
 AT1G50510 Poptr1|557900,Poptr1|549043  
 AT5G48020 Poptr1|691480  
 AT5G56220 Poptr1|66002  
 AT4G23440 Poptr1|343642  
 Poptr1|570574  
 AT1G12380,AT1G62870 Poptr1|350113,Poptr1|60461  
 AT4G27280,AT5G54490 Poptr1|596676,Poptr1|587571,Poptr1|582029,Poptr1|569032  
 Poptr1|568330,Poptr1|555416,Poptr1|568989,Poptr1|581154,Poptr1|568990,Poptr1|582064  
 Poptr1|571841,Poptr1|574558  
 AT2G46600 Poptr1|572427  
 AT5G08170 Poptr1|742431  
 AT1G12450  
 AT4G12000,AT4G22850 Poptr1|691183,Poptr1|712590  
 AT2G02370 Poptr1|675658,Poptr1|708950  
 AT4G37860,AT2G22720 Poptr1|721133,Poptr1|696177,Poptr1|64473  
 AT1G44575 Poptr1|551454  
 AT2G26680 Poptr1|592056,Poptr1|572054,Poptr1|684426  
 Poptr1|585852  
 AT4G33760 Poptr1|705452,Poptr1|557552,Poptr1|65323  
 AT1G50170 Poptr1|63770  
 AT1G78310 Poptr1|559068,Poptr1|551604  
 AT5G46780  
 AT1G80300,AT1G15500 Poptr1|693719,Poptr1|548631  
 AT5G14090 Poptr1|64978  
 Poptr1|693253,Poptr1|548048  
 AT3G27025  
 AT2G47290  
 Poptr1|572597  
 AT2G47300 Poptr1|552546  
 AT5G45420 Poptr1|676503  
 AT3G49400 Poptr1|569617  
 Poptr1|572836  
 AT2G43640 Poptr1|672320  
 AT3G49100 Poptr1|715108,Poptr1|692879  
 AT5G17710 Poptr1|571297  
 AT1G36390 Poptr1|72394,Poptr1|559168,Poptr1|711004  
 AT2G41540 Poptr1|351480  
 AT3G07690 Poptr1|693184,Poptr1|746929  
 AT3G25070 Poptr1|711575  
 AT3G04740 Poptr1|562449  
 AT1G10490,AT3G57940 Poptr1|71742,Poptr1|562730  
 AT5G35320 Poptr1|560623,Poptr1|702320  
 AT1G30810,AT2G34880  
 Poptr1|104437  
 AT1G63490 Poptr1|712503  
 AT2G38950 Poptr1|551028  
 AT4G20400 Poptr1|569305,Poptr1|586860,Poptr1|587522  
 AT5G46910 Poptr1|712170,Poptr1|590053  
 AT1G08620 Poptr1|665300,Poptr1|699857  
 Poptr1|738239  
 AT2G35075 Poptr1|671387  
 AT4G21520 Poptr1|647706,Poptr1|647705,Poptr1|568298  
 AT5G61040,AT5G08010 Poptr1|564301  
 AT3G51520 Poptr1|699186  
 AT4G36580,AT2G18330 Poptr1|593928,Poptr1|563169  
 AT3G03060,AT5G16930 Poptr1|569183,Poptr1|65851  
 AT3G12850  
 AT3G61140Poptr1|700184,Poptr1|684348  
 AT2G27120,AT1G08260 Poptr1|594813  
 AT2G47430 Poptr1|572623,Poptr1|597214,Poptr1|565207  
 AT3G55260 Poptr1|567489  
 Poptr1|353493  
 AT1G65590 Poptr1|720567  
 AT2G31870 Poptr1|99542,Poptr1|53033  
 AT2G31865  
 AT1G55915 Poptr1|583004  
 Poptr1|563478  
 AT1G05900,AT2G31450 Poptr1|75414  
 AT5G12220 Poptr1|64612  
 AT4G29910 Poptr1|572271,Poptr1|65659  
 AT4G28210 Poptr1|730523  
 Poptr1|57490,Poptr1|355225  
 AT1G35910  
 AT5G65140,AT5G10100 Poptr1|654797,Poptr1|650738  
 AT5G51460 Poptr1|346140,Poptr1|575657,Poptr1|647218  
 AT4G39770,AT2G22190

AT1G78090,AT1G22210 Poptr1|51933,Poptr1|347364  
AT4G12430,AT4G22590 Poptr1|704257,Poptr1|554210  
AT3G03870,AT5G18130 Poptr1|571199,Poptr1|573931  
AT3G27850,AT3G27830,AT3G27840 Poptr1|706755  
AT5G51200 Poptr1|702785  
AT4G35160,AT4G35150 Poptr1|557036,Poptr1|557037  
Poptr1|586838  
Poptr1|59041  
Poptr1|571762,Poptr1|597596,Poptr1|597595,Poptr1|690031  
Poptr1|740578,Poptr1|705466,Poptr1|588326,Poptr1|585447,Poptr1|107335,Poptr1|104292,Poptr1|59032  
6,Poptr1|582798,Poptr1|588323,Poptr1|588324,Poptr1|579082,Poptr1|671131,Poptr1|109208,Poptr1|690596  
Poptr1|586059,Poptr1|545245,Poptr1|586060,Poptr1|555739  
Poptr1|672337  
Poptr1|597597,Poptr1|584597  
Poptr1|554650  
AT1G26910,AT1G14320,AT1G66580 Poptr1|663639,Poptr1|574458  
AT1G13650  
Poptr1|574875  
AT2G03810 Poptr1|566755,Poptr1|696604  
AT4G03000 Poptr1|565687  
AT5G50170 Poptr1|700960  
AT1G03370 Poptr1|560079,Poptr1|690257  
AT1G21080,AT1G76700 Poptr1|642732  
AT1G77020 Poptr1|72535,Poptr1|342386  
AT4G39150,AT2G21510 Poptr1|556500  
Poptr1|550692,Poptr1|694942  
AT4G29780 Poptr1|73072,Poptr1|674866  
AT5G12010 Poptr1|587961,Poptr1|653855  
Poptr1|585332  
AT2G31340 Poptr1|348581  
AT1G73470 Poptr1|580644  
Poptr1|696409  
Poptr1|571009,Poptr1|726506  
Poptr1|553658,Poptr1|63706,Poptr1|578181,Poptr1|352899,Poptr1|578182  
AT3G04850  
AT4G14770,AT3G22760,AT3G22780  
Poptr1|571010,Poptr1|595447  
AT5G27560 Poptr1|570826  
AT5G11110 Poptr1|58572  
AT1G04920 Poptr1|49255  
AT5G20280 Poptr1|578888,Poptr1|745681  
AT4G10120 Poptr1|56833  
AT4G18375 Poptr1|545092,Poptr1|568422  
AT5G58750 Poptr1|54699  
AT4G24220  
Poptr1|551803,Poptr1|703162,Poptr1|712206,Poptr1|592041,Poptr1|592040,Poptr1|740554,Poptr1|67374  
3,Poptr1|551804,Poptr1|677926  
Poptr1|103519  
Poptr1|562242,Poptr1|557481,Poptr1|594510,Poptr1|594509  
AT1G55160 Poptr1|597636  
AT2G19530 Poptr1|561089  
AT1G68350 Poptr1|564546,Poptr1|566600  
AT1G12370 Poptr1|704231  
AT1G68725  
AT3G02670  
Poptr1|552310,Poptr1|700312  
Poptr1|642306  
AT5G65390,AT5G10430,AT2G22470  
Poptr1|594099  
AT2G14890 Poptr1|557478,Poptr1|549973  
AT2G23130,AT4G37450 Poptr1|553935,Poptr1|558921  
Poptr1|596277  
AT4G09030 Poptr1|72272  
Poptr1|658978  
AT5G04910 Poptr1|563501  
AT1G73940 Poptr1|550493  
AT5G49410 Poptr1|356934  
AT1G47980 Poptr1|106305,Poptr1|353996,Poptr1|106306  
AT3G62730 Poptr1|642406  
Poptr1|656523,Poptr1|592723  
AT1G13770 Poptr1|656524  
AT3G45890 Poptr1|691310  
AT2G05030  
Poptr1|107304,Poptr1|570942,Poptr1|72383,Poptr1|107376,Poptr1|99460,Poptr1|65743,Poptr1|580318,P  
optr1|348268,Poptr1|107469  
Poptr1|52246,Poptr1|693009  
AT1G76120,AT1G20370  
AT1G48570 Poptr1|575011,Poptr1|569733  
AT1G55040  
AT1G70650 Poptr1|55202  
AT2G31890 Poptr1|99539  
Poptr1|596348,Poptr1|563226

AT2G26070 Poptr1|577940,Poptr1|341785  
 AT3G51040  
 AT2G46100 Poptr1|711169  
 AT3G04890  
 AT1G34130 Poptr1|580593,Poptr1|743464,Poptr1|569431  
 Poptr1|587387  
 Poptr1|690576  
 AT5G19690 Poptr1|578521  
 Poptr1|647442  
 AT1G55350 Poptr1|647443,Poptr1|647445,Poptr1|547590  
 AT5G51130Poptr1|578503  
 Poptr1|652940  
 AT4G07400  
 AT5G67250,AT3G50080 Poptr1|651111,Poptr1|655088  
 AT1G47056 Poptr1|347627,Poptr1|591999  
 AT4G31600 Poptr1|737483,Poptr1|353077  
 Poptr1|596446  
 AT4G13890  
 AT4G37930  
 AT4G13930 Poptr1|681317,Poptr1|707158  
 AT4G32520 Poptr1|561693  
 Poptr1|676824  
 Poptr1|589729  
 AT5G26780 Poptr1|643921  
 Poptr1|563419,Poptr1|725211  
 Poptr1|548738  
 AT1G22020,AT1G36370 Poptr1|551519,Poptr1|72393  
 Poptr1|676981,Poptr1|597306  
 AT5G14530 Poptr1|706765,Poptr1|668454  
 AT5G66240 Poptr1|356889  
 Poptr1|566261,Poptr1|564827  
 AT1G03130,AT4G02770  
 AT1G26630,AT1G69410  
 Poptr1|702242,Poptr1|695222  
 Poptr1|677394,Poptr1|724093,Poptr1|696696  
 AT1G13950  
 AT1G07300  
 Poptr1|549087  
 AT5G01225,AT3G09032 Poptr1|560887,Poptr1|576937  
 AT3G10780  
 Poptr1|551472  
 AT1G57620,AT1G09580 Poptr1|553430,Poptr1|709694  
 AT1G21900  
 AT2G03290,AT2G03040,AT1G14010,AT1G69460,AT1G26690  
 Poptr1|566996,Poptr1|659269,Poptr1|589249,Poptr1|720823,Poptr1|596376  
 AT3G29070 Poptr1|595348,Poptr1|736377,Poptr1|597752,Poptr1|99415  
 AT1G67650,AT1G67680 Poptr1|561539,Poptr1|561538  
 AT1G08190 Poptr1|686941,Poptr1|63849  
 Poptr1|103538,Poptr1|546039,Poptr1|557278  
 AT1G49330,AT2G16190  
 AT2G34110,AT1G34355 Poptr1|703192  
 AT1G11060,AT1G61030 Poptr1|647752,Poptr1|670952,Poptr1|647753,Poptr1|670951  
 Poptr1|676660,Poptr1|684936  
 Poptr1|592821,Poptr1|552954,Poptr1|354907  
 AT5G26300,AT5G26280,AT5G26260,AT5G26320,AT5G26290,AT2G04190,AT2G04170,AT4G09780,AT4G09770,AT2  
 G32880,AT2G32870,AT4G00780,AT4G01390,AT3G46190,AT1G58270,AT3G28220,AT3G20360,AT3G20370,AT3G20  
 380,AT1G69650,AT1G69660,AT3G22080,AT2G15710,AT1G65050,AT1G65150,AT1G65370  
 Poptr1|577359,Poptr1|668345,Poptr1|577358,Poptr1|680828  
 AT3G17380 Poptr1|591710,Poptr1|675387,Poptr1|591714  
 AT1G09960 Poptr1|710028  
 AT1G66570,AT2G14670,AT5G43610,AT5G06170,AT1G71890,AT1G71880,AT1G22710  
 Poptr1|593025,Poptr1|592216,Poptr1|702566  
 AT2G02860 Poptr1|55154,Poptr1|354422  
 AT2G38770 Poptr1|547843,Poptr1|693176  
 AT3G50590 Poptr1|71983,Poptr1|696038  
 Poptr1|53320  
 AT4G01110,AT2G46300,AT2G30505 Poptr1|572350,Poptr1|552244  
 AT1G71350 Poptr1|571601,Poptr1|688059,Poptr1|97246  
 AT5G36000,AT3G61730 Poptr1|644578,Poptr1|552271,Poptr1|572390  
 AT3G62500  
 AT2G28840 Poptr1|558084,Poptr1|683826  
 AT3G12570 Poptr1|588737,Poptr1|656079  
 AT5G02480,AT2G37570  
 AT1G45231  
 AT1G30550  
 Poptr1|591959  
 Poptr1|669275  
 Poptr1|737555  
 Poptr1|737553  
 AT2G26890 Poptr1|669276  
 Poptr1|563928  
 AT1G74260 Poptr1|563927

Poptr1|697759  
 AT2G27970  
 AT2G27960 Poptr1|584460  
 AT5G61770 Poptr1|644750,Poptr1|644751  
 AT2G29950  
 AT2G40080 Poptr1|353674  
 AT2G06255 Poptr1|739115  
 Poptr1|557921,Poptr1|64261  
 AT1G17455,AT1G72630 Poptr1|693745,Poptr1|640610,Poptr1|574460  
 AT1G71500  
 Poptr1|581428  
 AT1G10580 Poptr1|565006,Poptr1|54985  
 AT5G54520 Poptr1|730261  
 AT5G13760 Poptr1|686828,Poptr1|691445  
 AT3G32930 Poptr1|693108  
 AT1G60080 Poptr1|576355,Poptr1|560507  
 AT2G40475  
 AT3G56260  
 Poptr1|357056  
 AT5G01790  
 Poptr1|560976,Poptr1|577146  
 AT1G06930 Poptr1|574504,Poptr1|571893  
 AT2G19385,AT2G19380 Poptr1|561030  
 AT4G00590 Poptr1|731038  
 AT2G27730 Poptr1|594966,Poptr1|697077  
 AT4G21620 Poptr1|555520  
 AT2G19000  
 AT1G61255  
 AT1G28080  
 AT5G13250 Poptr1|350559,Poptr1|548079  
 AT1G32790,AT4G10610 Poptr1|574669  
 Poptr1|49454  
 Poptr1|678031,Poptr1|732764,Poptr1|345756  
 AT3G49390,AT5G24440  
 Poptr1|65766  
 Poptr1|680165,Poptr1|661271  
 AT3G14450,AT1G53650 Poptr1|707802,Poptr1|660689  
 AT3G48030 Poptr1|345932,Poptr1|57587  
 Poptr1|571657,Poptr1|571659,Poptr1|97273  
 AT3G54190,AT2G38630 Poptr1|589597,Poptr1|734414  
 Poptr1|591287  
 Poptr1|571660  
 AT3G21300 Poptr1|580256  
 AT2G27860,AT1G08200 Poptr1|594851,Poptr1|649062  
 AT3G12990,AT3G60500 Poptr1|549052  
 AT4G04190 Poptr1|686626  
 AT1G79975 Poptr1|640702,Poptr1|693707  
 Poptr1|572223  
 AT2G38040 Poptr1|576915,Poptr1|560869  
 AT5G44750 Poptr1|557456  
 AT3G43540 Poptr1|717839  
 Poptr1|663286  
 AT1G65000  
 AT1G27930,AT1G67330 Poptr1|554785,Poptr1|548026  
 Poptr1|689632,Poptr1|574206  
 AT1G33800,AT4G09990  
 AT4G24910 Poptr1|570260,Poptr1|575363  
 AT1G71690  
 AT1G09610 Poptr1|596760  
 AT4G10000 Poptr1|678194  
 AT5G03880 Poptr1|561503  
 AT3G19580  
 AT1G27730,AT5G04340,AT5G43170 Poptr1|710467,Poptr1|730802,Poptr1|684005  
 AT3G49930,AT5G67450  
 AT5G56200  
 AT1G49900  
 AT2G26940 Poptr1|548693  
 AT1G02040  
 AT2G17180  
 AT4G35280 Poptr1|594999,Poptr1|556780  
 AT3G10380 Poptr1|686543,Poptr1|698685  
 AT1G28250 Poptr1|647960  
 AT2G41510 Poptr1|587825,Poptr1|350818,Poptr1|560473,Poptr1|576242  
 AT3G63440  
 Poptr1|559778  
 AT1G75450 Poptr1|559779,Poptr1|550963  
 AT5G56970 Poptr1|76017,Poptr1|561098  
 AT5G21482 Poptr1|561588  
 AT4G29740,AT2G19500  
 AT2G48040 Poptr1|585557,Poptr1|572791  
 AT2G48050 Poptr1|572792  
 AT2G43460,AT3G59540 Poptr1|567190,Poptr1|679624,Poptr1|656327,Poptr1|654438

AT1G34000 Poptr1|693060,Poptr1|682163  
AT2G19440,AT1G64760 Poptr1|573902,Poptr1|571222  
AT3G04010,AT5G18220  
AT4G17180 Poptr1|717348,Poptr1|582323  
AT3G24330 Poptr1|578415  
AT4G31140Poptr1|577784,Poptr1|583206  
Poptr1|558031  
AT5G58480  
Poptr1|103596  
Poptr1|595103,Poptr1|562733  
AT5G58090 Poptr1|685761,Poptr1|584534  
Poptr1|583207,Poptr1|103150,Poptr1|593341,Poptr1|106449  
AT5G64790  
AT5G20870 Poptr1|561542  
AT5G51150Poptr1|661533,Poptr1|588174,Poptr1|575511  
AT4G39940  
AT2G14750 Poptr1|697389,Poptr1|642099  
AT3G03900  
AT5G67520  
Poptr1|571204,Poptr1|729987  
Poptr1|652404,Poptr1|667498,Poptr1|667132  
AT4G12570 Poptr1|667499  
AT3G09390,AT5G02380  
Poptr1|677329,Poptr1|690566,Poptr1|690284,Poptr1|580396,Poptr1|558075,Poptr1|683824,Poptr1|56075  
9  
Poptr1|553052  
AT5G07090,AT5G58420,AT2G17360  
Poptr1|47715,Poptr1|570736,Poptr1|690073,Poptr1|341741,Poptr1|577044  
AT1G66520 Poptr1|553027  
AT5G05930 Poptr1|567340,Poptr1|563960  
Poptr1|705111,Poptr1|647169  
AT4G21090,AT4G05450  
AT1G45230 Poptr1|703121,Poptr1|644113  
AT3G46630 Poptr1|592003,Poptr1|740486,Poptr1|592002  
Poptr1|547638  
AT1G11880Poptr1|555232  
AT5G17200  
Poptr1|348280,Poptr1|561884,Poptr1|561886,Poptr1|578195,Poptr1|561885,Poptr1|575580,Poptr1|58674  
9  
AT1G65570 Poptr1|698448  
AT3G26610  
AT2G43870,AT3G59850  
Poptr1|585092,Poptr1|108375,Poptr1|99565,Poptr1|585102,Poptr1|585081,Poptr1|695718,Poptr1|53038,  
Poptr1|585095,Poptr1|585104,Poptr1|104360,Poptr1|353172,Poptr1|55666,Poptr1|594285,Poptr1|562099,Poptr1|752  
64  
AT5G39910 Poptr1|575279  
AT1G02460,AT4G01890  
AT2G43880  
AT1G80170 Poptr1|691196  
Poptr1|64787  
AT1G23460,AT1G70500 Poptr1|742328,Poptr1|49488  
AT3G07850,AT3G14040  
AT4G32370,AT4G32375,AT4G32380  
Poptr1|105430  
AT1G80140 Poptr1|597650  
AT1G48100 Poptr1|353979,Poptr1|723995  
AT5G27530,AT4G35670,AT5G44830,AT5G44840,AT3G15720  
AT2G41850,AT3G57510 Poptr1|735000,Poptr1|351537  
Poptr1|565180  
AT2G43860  
AT1G02790 Poptr1|105911,Poptr1|552472,Poptr1|342896  
AT3G07970  
AT1G05650,AT1G05660  
AT5G14650 Poptr1|49152  
Poptr1|565526,Poptr1|597399,Poptr1|565568,Poptr1|565569  
Poptr1|585105  
Poptr1|585106  
AT1G78400,AT2G33160,AT4G13760,AT2G40310,AT2G15460,AT2G15470,AT2G15450,AT2G26620,AT1G43090,AT1  
G43100,AT1G43080,AT1G17150 Poptr1|550309,Poptr1|558011,Poptr1|569538  
AT1G10640,AT1G60590 Poptr1|726299,Poptr1|345546  
AT3G07820,AT3G07840,AT3G07830,AT5G48140  
Poptr1|585083,Poptr1|640527,Poptr1|588667,Poptr1|581027,Poptr1|592632,Poptr1|60440,Poptr1|53335  
Poptr1|348396  
AT1G56710 Poptr1|97579  
AT2G43890 Poptr1|99573,Poptr1|585108,Poptr1|562085  
AT4G18180 Poptr1|556757  
AT2G37690,AT2G05140 Poptr1|586808,Poptr1|699848  
AT1G28100 Poptr1|63197,Poptr1|554701  
AT2G38790 Poptr1|593448,Poptr1|563626,Poptr1|567975  
AT2G12880  
AT5G52380 Poptr1|356231,Poptr1|699296,Poptr1|667037  
AT3G01360 Poptr1|593935



AT3G27430,AT5G40580 Poptr1|647789,Poptr1|736156  
Poptr1|565977  
AT1G03210,AT4G02850,AT4G02860 Poptr1|724280  
AT5G13550,AT3G12520 Poptr1|724813,Poptr1|686507  
AT4G02700  
AT1G23090 Poptr1|345306,Poptr1|726870,Poptr1|643492  
AT1G77990 Poptr1|692680  
AT3G15990 Poptr1|548672,Poptr1|685024  
Poptr1|561009  
Poptr1|590677  
AT4G08620  
AT5G10180 Poptr1|51732,Poptr1|53195  
Poptr1|597192  
AT1G22150,AT1G78000 Poptr1|72375,Poptr1|710534  
AT3G51895 Poptr1|342288,Poptr1|72795,Poptr1|354505,Poptr1|55109  
Poptr1|586701  
AT5G19600 Poptr1|690402  
AT4G03600,AT1G03730 Poptr1|60725  
AT5G50175 Poptr1|575235  
AT4G28340,AT4G28330  
AT5G17860 Poptr1|571271,Poptr1|573981  
Poptr1|104428  
AT5G17850  
Poptr1|593293,Poptr1|663163,Poptr1|573982  
AT1G08960 Poptr1|699766  
AT3G14070,AT1G54115 Poptr1|584118,Poptr1|343295  
AT1G23205,AT1G70720  
AT2G47670,AT3G62820 Poptr1|552442,Poptr1|664439  
AT5G51520,AT4G25250 Poptr1|570589,Poptr1|575672,Poptr1|575676  
Poptr1|570591,Poptr1|733984  
AT1G62760 Poptr1|646475,Poptr1|97349  
AT4G00080 Poptr1|347839,Poptr1|572085  
AT5G62360 Poptr1|575669,Poptr1|733981,Poptr1|575668  
AT4G25260  
AT5G20740 Poptr1|589329  
AT3G47670 Poptr1|554326,Poptr1|548500  
AT5G62330,AT5G62340  
AT4G12390,AT1G62770 Poptr1|581218,Poptr1|554227  
AT2G01610,AT1G14890 Poptr1|726835,Poptr1|564644  
AT3G47380,AT5G62350 Poptr1|570588  
Poptr1|570658  
AT5G60190  
AT5G43650 Poptr1|354554,Poptr1|566140  
AT4G33250 Poptr1|683074,Poptr1|739236  
Poptr1|656343,Poptr1|665142,Poptr1|656344,Poptr1|567172  
AT1G65470  
Poptr1|354553  
AT4G14510,AT3G23070 Poptr1|698028  
AT3G25440 Poptr1|573197  
AT4G29750 Poptr1|352061  
Poptr1|553129,Poptr1|106849  
AT3G18390 Poptr1|699500  
AT5G16180 Poptr1|97120  
AT3G01370 Poptr1|64739  
AT4G00525 Poptr1|552165  
AT5G56290 Poptr1|708236,Poptr1|704495  
AT5G52890,AT5G54930 Poptr1|571556,Poptr1|569131  
AT1G45233,AT5G42920 Poptr1|551848,Poptr1|703123  
AT3G13235 Poptr1|582553,Poptr1|582557,Poptr1|550640  
AT3G61290,AT3G61280,AT2G45840 Poptr1|552156,Poptr1|552157  
AT3G61270,AT2G45830 Poptr1|731072  
AT1G63420 Poptr1|350201  
AT1G07220 Poptr1|586418,Poptr1|64256  
AT3G48980,AT5G23850 Poptr1|667034  
AT2G39990 Poptr1|696800,Poptr1|659552  
AT2G06025 Poptr1|589283  
AT5G04020,AT2G38800 Poptr1|560433,Poptr1|576215  
Poptr1|687955  
AT3G05060,AT5G27120,AT5G27140  
AT1G56110,AT3G12860 Poptr1|570234,Poptr1|575324  
Poptr1|746054  
AT2G07360 Poptr1|584545  
Poptr1|57133  
AT5G19220 Poptr1|720391  
AT4G39210,AT2G21590 Poptr1|546089,Poptr1|721986  
AT5G48300 Poptr1|573143  
AT1G27680 Poptr1|346791,Poptr1|685406  
AT1G05610 Poptr1|562078,Poptr1|585045  
AT3G51610 Poptr1|577159  
Poptr1|597217  
AT1G75100  
AT1G21660 Poptr1|651462,Poptr1|347217

AT1G75310  
Poptr1|651952,Poptr1|346795  
AT4G12770,AT4G12780 Poptr1|711377,Poptr1|573161  
Poptr1|347727,Poptr1|591823,Poptr1|104997  
Poptr1|568657,Poptr1|568434  
AT1G30280 Poptr1|648413,Poptr1|660533  
AT4G36520 Poptr1|655335,Poptr1|593914,Poptr1|655336  
AT2G31070  
Poptr1|574356,Poptr1|592176  
AT1G53230,AT3G15030 Poptr1|642377,Poptr1|660697  
AT5G65960 Poptr1|76037,Poptr1|684302  
AT5G19530 Poptr1|685577  
Poptr1|726566,Poptr1|564829  
AT4G15880,AT4G00690 Poptr1|587320,Poptr1|697827,Poptr1|593624  
AT3G06910  
AT4G14746 Poptr1|657197  
Poptr1|63743,Poptr1|349525  
Poptr1|680287,Poptr1|571022  
AT3G07150 Poptr1|348989  
AT5G01230 Poptr1|58963  
AT4G39870 Poptr1|558538,Poptr1|685985  
AT2G05590  
Poptr1|658066  
Poptr1|742305,Poptr1|725506,Poptr1|595859,Poptr1|582684,Poptr1|585597  
AT1G56280  
AT3G06760,AT5G49230 Poptr1|673179,Poptr1|586601  
AT3G05700,AT5G26990 Poptr1|671731,Poptr1|662637  
Poptr1|662045  
Poptr1|704191  
AT1G02750,AT4G02200 Poptr1|572658,Poptr1|684268  
AT1G76405,AT1G20816 Poptr1|567107,Poptr1|554772,Poptr1|559984  
AT4G23880 Poptr1|350351,Poptr1|583539,Poptr1|350350,Poptr1|546027,Poptr1|63423  
AT1G15390 Poptr1|640630  
AT5G03370 Poptr1|589469  
AT2G33450 Poptr1|564970,Poptr1|725884  
AT3G24500 Poptr1|669292  
AT2G42680,AT3G58680 Poptr1|682717,Poptr1|683452  
AT2G38050 Poptr1|588604,Poptr1|56853,Poptr1|595475,Poptr1|576916  
AT1G09370,AT1G09360 Poptr1|97597  
AT1G77370 Poptr1|655391  
AT5G20500 Poptr1|591537,Poptr1|669802  
Poptr1|586312  
AT5G50300 Poptr1|570205,Poptr1|575295  
AT3G10960 Poptr1|577151,Poptr1|596945  
AT5G02200 Poptr1|560778,Poptr1|576811  
AT3G10700  
Poptr1|578960,Poptr1|652828  
Poptr1|108449  
Poptr1|585639  
AT5G35930  
Poptr1|590237  
AT1G79230,AT1G16460 Poptr1|71832,Poptr1|686035  
AT3G27700 Poptr1|64730,Poptr1|701787  
AT5G01270 Poptr1|351902  
AT4G21670 Poptr1|743771,Poptr1|555554  
AT1G80950 Poptr1|703073,Poptr1|551926  
Poptr1|640103  
AT1G10870,AT1G60860  
AT5G13300 Poptr1|640102,Poptr1|554695  
AT5G61980 Poptr1|575452  
Poptr1|574339  
AT3G58610 Poptr1|690109,Poptr1|693931,Poptr1|591712  
Poptr1|592190  
AT5G62500,AT3G47690 Poptr1|97423,Poptr1|661879  
AT5G67270 Poptr1|655084,Poptr1|72046  
AT1G06750,AT2G30630 Poptr1|551081,Poptr1|72848  
AT1G04280  
Poptr1|657253,Poptr1|720947,Poptr1|643189,Poptr1|345442  
Poptr1|722038  
AT1G19400,AT1G75180 Poptr1|553348  
AT1G01500 Poptr1|572305,Poptr1|552208  
Poptr1|556463  
AT5G55760 Poptr1|49394  
AT3G56120 Poptr1|702117  
AT3G49580,AT3G49570,AT5G24655,AT5G24660 Poptr1|666013,Poptr1|341979  
AT3G16990 Poptr1|696624  
AT3G24530 Poptr1|578467,Poptr1|584014,Poptr1|565408  
AT1G32080 Poptr1|646321  
AT1G07270,AT2G29680 Poptr1|683807  
AT3G24630 Poptr1|578477  
AT5G42710 Poptr1|588112,Poptr1|553351  
Poptr1|578791

AT1G15860 Poptr1|673874,Poptr1|684770,Poptr1|639936  
Poptr1|551431,Poptr1|583628  
AT1G72250 Poptr1|65688,Poptr1|569144  
AT3G43210  
AT2G47500 Poptr1|572660,Poptr1|342902  
Poptr1|346737  
AT5G02370 Poptr1|695434  
AT5G33300 Poptr1|102775  
Poptr1|589449  
Poptr1|569842  
AT4G39050,AT2G21380 Poptr1|694188,Poptr1|721903  
AT1G21730 Poptr1|551430  
AT5G47820 Poptr1|342592  
Poptr1|737578  
Poptr1|72164,Poptr1|347510  
AT4G14330 Poptr1|354597  
AT2G22610  
AT3G50240  
AT1G12430 Poptr1|548564,Poptr1|693480  
AT5G27550 Poptr1|570825,Poptr1|588656  
AT3G10310 Poptr1|560481  
AT3G20150 Poptr1|550152  
Poptr1|724006  
AT5G42490,AT4G24170  
AT3G44050 Poptr1|594902  
AT2G28620  
AT3G63480 Poptr1|570882  
AT2G36200 Poptr1|688761,Poptr1|685604  
Poptr1|680450  
AT5G27000 Poptr1|729466,Poptr1|581927  
AT1G63640,AT5G41310 Poptr1|63538,Poptr1|350230  
AT1G55550  
Poptr1|681735,Poptr1|590965,Poptr1|592614  
AT5G27950  
Poptr1|576621  
Poptr1|347560  
AT3G19050  
AT3G10180  
AT1G09170  
AT4G26660  
Poptr1|588061,Poptr1|573136  
AT3G23670,AT4G14150 Poptr1|343118  
Poptr1|693139,Poptr1|62659  
AT3G17360  
AT5G55520  
AT5G60930 Poptr1|551661,Poptr1|588144  
Poptr1|692281  
AT4G05190,AT4G21270 Poptr1|685136,Poptr1|687509  
Poptr1|685824  
AT3G54870 Poptr1|353346,Poptr1|725059  
Poptr1|76446  
AT5G66310,AT3G51150 Poptr1|719691,Poptr1|703390  
Poptr1|581466  
AT1G59540 Poptr1|56936  
Poptr1|692280,Poptr1|551662  
AT3G44730 Poptr1|691960,Poptr1|704514  
Poptr1|645981  
AT3G16060 Poptr1|548842  
AT2G37420 Poptr1|560735  
AT3G49650  
AT1G18410,AT1G73860 Poptr1|574896,Poptr1|569827  
Poptr1|53299  
AT1G20060 Poptr1|699927  
Poptr1|595613,Poptr1|579808  
AT3G45850 Poptr1|64446,Poptr1|697675  
AT1G18370 Poptr1|345828,Poptr1|574931  
AT1G18550  
AT4G27180,AT5G54670 Poptr1|56005,Poptr1|730309  
Poptr1|590877  
AT5G23910 Poptr1|575840  
AT3G12020,AT5G06670 Poptr1|576397,Poptr1|695256  
Poptr1|655429,Poptr1|569826  
AT1G01950 Poptr1|342705,Poptr1|688124  
AT2G21300,AT4G38950 Poptr1|713145,Poptr1|697231  
AT5G65930 Poptr1|684086,Poptr1|699189  
Poptr1|591579  
AT5G39250 Poptr1|577740,Poptr1|596221,Poptr1|648543  
AT5G01075 Poptr1|572051,Poptr1|557499  
AT1G10840 Poptr1|552842,Poptr1|732129  
AT5G18420 Poptr1|692121,Poptr1|585317,Poptr1|545413  
Poptr1|590202  
AT3G23490 Poptr1|687004

AT5G63330  
Poptr1|642171  
Poptr1|345997,Poptr1|57654  
AT5G10550,AT5G65630  
AT1G06230  
AT2G34900 Poptr1|353418  
Poptr1|722527,Poptr1|642170  
Poptr1|550095,Poptr1|568478  
Poptr1|681022  
AT1G73150,AT1G17790  
Poptr1|596734  
Poptr1|574351  
AT3G27260 Poptr1|64906  
AT3G01770,AT5G14270  
AT5G46550  
AT3G52280  
Poptr1|660695,Poptr1|642381  
AT5G63320  
Poptr1|576975,Poptr1|560916  
AT3G55960 Poptr1|659512,Poptr1|656249  
Poptr1|352228  
AT4G38930,AT2G21270 Poptr1|648701,Poptr1|649311  
AT2G29070 Poptr1|683816  
AT2G45530 Poptr1|569242,Poptr1|550488  
AT3G21540 Poptr1|739600  
AT1G25330  
Poptr1|545344,Poptr1|580804  
AT1G18400,AT1G73830 Poptr1|661736  
AT4G36930 Poptr1|72016  
AT1G10120 Poptr1|551748,Poptr1|72108  
Poptr1|347641,Poptr1|591980  
AT1G35460,AT4G09180 Poptr1|703215,Poptr1|738792  
AT5G62610  
AT2G18300,AT4G36540  
AT1G59640 Poptr1|686188  
AT3G42310 Poptr1|656738  
AT1G26260  
AT2G46970 Poptr1|700355  
AT2G43010,AT3G59060 Poptr1|651728  
Poptr1|347594  
Poptr1|556478,Poptr1|649402  
AT3G07340,AT5G48560 Poptr1|710327,Poptr1|572918,Poptr1|553223  
Poptr1|575437,Poptr1|570330  
AT3G57800,AT2G42300 Poptr1|704719,Poptr1|701362  
Poptr1|76312,Poptr1|593925  
AT1G68920 Poptr1|656739,Poptr1|566736  
AT3G23690  
AT5G61270,AT1G09530  
AT4G34530  
AT5G50915  
Poptr1|666377  
AT1G51140Poptr1|639895  
Poptr1|554707,Poptr1|63193  
AT1G53120 Poptr1|728397  
AT5G11510  
Poptr1|350938,Poptr1|639772  
Poptr1|717877  
AT4G26930,AT5G55020 Poptr1|582715  
Poptr1|570457,Poptr1|575814  
Poptr1|565490  
AT1G68320,AT1G25340 Poptr1|566603,Poptr1|564542,Poptr1|732992,Poptr1|569814  
AT2G47190  
AT1G66230 Poptr1|552946,Poptr1|555978  
Poptr1|709088,Poptr1|554533,Poptr1|554534,Poptr1|348105  
AT3G01530  
AT2G31180,AT1G06180,AT3G23250 Poptr1|643153,Poptr1|52142,Poptr1|101321,Poptr1|719990  
Poptr1|64485  
AT4G28110  
Poptr1|668762,Poptr1|653954  
AT5G17800  
Poptr1|557085,Poptr1|556633,Poptr1|679119  
Poptr1|561590  
Poptr1|347682  
AT1G57560,AT1G09540  
Poptr1|659040  
AT2G37630 Poptr1|695428  
AT5G62320  
Poptr1|101475,Poptr1|668844,Poptr1|717876,Poptr1|100037,Poptr1|60814  
AT4G21440,AT4G05100 Poptr1|544991  
AT3G30210 Poptr1|545980,Poptr1|545950,Poptr1|98829  
Poptr1|563966,Poptr1|659589  
AT4G17785

AT4G37780  
AT5G40350,AT3G27810 Poptr1|64790  
AT4G12350 Poptr1|575151  
AT1G66390,AT1G56650,AT1G66380,AT1G66370  
Poptr1|348822,Poptr1|552998,Poptr1|552994,Poptr1|348818,Poptr1|348817,Poptr1|552999  
AT1G74650  
AT5G35550  
Poptr1|53269  
AT5G58850,AT5G11050  
AT2G36890 Poptr1|667877,Poptr1|676067,Poptr1|584440,Poptr1|558303  
AT1G79180,AT1G16490,AT3G12820,AT1G56160  
AT5G65230,AT5G10280 Poptr1|643766,Poptr1|51927  
AT3G13540 Poptr1|595828,Poptr1|639636,Poptr1|693120  
Poptr1|57184  
Poptr1|645088  
AT5G12870  
AT3G09230  
Poptr1|354709,Poptr1|356373  
AT5G07700,AT5G07690,AT5G61420  
AT3G53200 Poptr1|589497  
AT4G09460,AT1G35515,AT1G22640  
Poptr1|571286,Poptr1|573987  
Poptr1|347175,Poptr1|559321  
AT4G33450 Poptr1|71521,Poptr1|562466  
Poptr1|552995  
AT5G16770,AT3G02940  
AT4G13480,AT3G24310 Poptr1|354635  
Poptr1|64283  
Poptr1|56512,Poptr1|581592  
Poptr1|580306,Poptr1|571192,Poptr1|571190,Poptr1|596671  
AT1G18960  
AT1G18710,AT1G74430  
AT2G26950,AT2G26960  
Poptr1|356372,Poptr1|688588  
Poptr1|355811  
Poptr1|650712,Poptr1|570087  
AT3G60460 Poptr1|591719,Poptr1|347796  
AT1G63910 Poptr1|646666,Poptr1|691116  
AT5G39700  
AT5G62470,AT3G47600 Poptr1|556366,Poptr1|701828  
Poptr1|60638  
AT5G26660  
AT1G74080,AT1G18570,AT5G60890 Poptr1|700066,Poptr1|665990  
AT5G40330,AT5G14750,AT3G27920  
AT5G49330  
AT4G01680  
AT3G62610,AT2G47460  
Poptr1|75713,Poptr1|71630  
AT3G28910  
Poptr1|570120,Poptr1|575224  
AT1G48000  
Poptr1|342934  
AT3G13890 Poptr1|703929  
AT2G32460  
Poptr1|550654,Poptr1|98110  
Poptr1|548692,Poptr1|697703  
AT4G25560,AT5G52260,AT3G48920 Poptr1|569596,Poptr1|356244  
AT4G32730 Poptr1|701968,Poptr1|561783  
Poptr1|582403,Poptr1|548580,Poptr1|668851,Poptr1|349755  
AT4G38620 Poptr1|678131  
AT4G22680 Poptr1|581214,Poptr1|712000  
AT5G02320,AT3G09370 Poptr1|344245  
Poptr1|655080,Poptr1|558903,Poptr1|592009,Poptr1|644073  
AT3G55730,AT2G39880  
AT5G16600  
Poptr1|642041,Poptr1|722301  
AT2G16720,AT4G34990  
AT5G52600 Poptr1|560580,Poptr1|578919  
Poptr1|568324,Poptr1|568325,Poptr1|544925,Poptr1|571817  
Poptr1|656277  
Poptr1|644814  
AT1G34670 Poptr1|342481  
AT3G61250 Poptr1|731056,Poptr1|644433  
AT5G23000  
AT4G18770 Poptr1|575172,Poptr1|355897,Poptr1|76373,Poptr1|356929  
AT5G57620 Poptr1|61115  
Poptr1|554033,Poptr1|356649  
Poptr1|551740,Poptr1|718021  
AT3G08500 Poptr1|49071,Poptr1|722776  
AT5G65790,AT3G49690  
AT1G71030 Poptr1|714142,Poptr1|684189,Poptr1|105761,Poptr1|566512,Poptr1|564597  
AT5G67300,AT3G50060

Poptr1|71842  
AT5G49620,AT3G06490 Poptr1|345180  
Poptr1|577665  
AT1G69560  
AT1G73410,AT1G17950 Poptr1|743577,Poptr1|569401,Poptr1|562189  
AT3G29020  
Poptr1|574970  
AT3G11440,AT5G06100  
AT2G23290,AT4G37260  
AT5G54230  
AT3G46130,AT5G59780 Poptr1|64431,Poptr1|650305  
Poptr1|353853,Poptr1|567031  
Poptr1|552416,Poptr1|700354  
AT4G00540 Poptr1|350192  
AT5G14340 Poptr1|64892  
Poptr1|64783  
AT2G02820,AT1G14350 Poptr1|354425  
Poptr1|714382,Poptr1|705661,Poptr1|580774  
AT3G28470 Poptr1|577547  
Poptr1|60650,Poptr1|573617  
AT3G12720 Poptr1|63279,Poptr1|554618,Poptr1|345093  
AT5G40360,AT3G27785,AT5G40430,AT2G25230  
Poptr1|345508  
AT1G26780  
AT1G08810 Poptr1|688014  
Poptr1|548691  
AT5G56110  
Poptr1|571811  
AT5G15310,AT3G01140 Poptr1|103277,Poptr1|564238,Poptr1|720738,Poptr1|668604  
AT3G47700 Poptr1|97422  
AT1G08400 Poptr1|558181  
Poptr1|545088  
AT1G73350  
AT4G34280 Poptr1|557476,Poptr1|691750  
Poptr1|100381  
AT4G37830 Poptr1|655509  
Poptr1|63541,Poptr1|554368  
AT4G23120,AT2G25120,AT3G43990  
Poptr1|554369,Poptr1|548465,Poptr1|554367  
AT4G11560  
AT1G08480 Poptr1|558370  
AT4G22720 Poptr1|654459,Poptr1|679578  
AT5G16270 Poptr1|724314  
AT5G40840 Poptr1|585273  
AT5G52820 Poptr1|650010  
AT5G64730 Poptr1|683990  
AT4G32990,AT2G26060  
Poptr1|683399  
AT5G50230  
AT1G71840 Poptr1|740621,Poptr1|702570  
Poptr1|690869,Poptr1|350859  
Poptr1|576250  
AT5G16750 Poptr1|571428,Poptr1|573797  
AT3G49660 Poptr1|51888,Poptr1|696179  
AT2G05720,AT2G41500  
AT4G29830 Poptr1|561028  
Poptr1|710584,Poptr1|64218,Poptr1|572785  
AT5G67320 Poptr1|746796,Poptr1|51865  
Poptr1|344120  
AT4G02730 Poptr1|551164  
AT5G13480  
AT2G43770 Poptr1|574420  
AT4G31790 Poptr1|709838  
AT2G29640 Poptr1|64289  
AT4G11970Poptr1|709514  
AT1G30460 Poptr1|55839,Poptr1|65410  
Poptr1|573770,Poptr1|738290  
AT1G64790 Poptr1|573768  
AT3G51050 Poptr1|719639,Poptr1|593888  
AT3G63430 Poptr1|551114  
AT5G55810 Poptr1|61502,Poptr1|570836  
AT5G60630,AT3G45230 Poptr1|595053  
AT3G02220  
Poptr1|712848  
Poptr1|597206,Poptr1|100068  
Poptr1|657365  
AT4G31240 Poptr1|98482  
AT1G60420  
Poptr1|565873,Poptr1|565874,Poptr1|670127,Poptr1|565875,Poptr1|565876,Poptr1|565872,Poptr1|67896  
1,Poptr1|565871,Poptr1|108162,Poptr1|657367  
Poptr1|715540,Poptr1|642903  
AT1G79020,AT1G16690 Poptr1|106258,Poptr1|582200,Poptr1|573258,Poptr1|563367

AT3G07530  
Poptr1|596867,Poptr1|681152  
AT4G17060  
AT3G24860 Poptr1|553172  
AT2G44730 Poptr1|591748  
AT5G49530 Poptr1|76266  
Poptr1|585677,Poptr1|349433  
Poptr1|585054  
Poptr1|590230,Poptr1|597025  
Poptr1|351406,Poptr1|576167  
AT4G17220 Poptr1|717279  
AT2G01750,AT1G14840,AT1G68060,AT1G24764 Poptr1|686285,Poptr1|566434  
Poptr1|596682  
Poptr1|586814,Poptr1|646815  
AT4G04740,AT4G04720,AT4G21940,AT4G04710  
AT3G51850 Poptr1|695376  
AT2G38490  
AT2G30040,AT1G07150 Poptr1|557665,Poptr1|549424  
Poptr1|59993  
Poptr1|544812,Poptr1|687463  
Poptr1|581486  
Poptr1|56841  
Poptr1|582696,Poptr1|572661  
AT4G10730,AT4G24100 Poptr1|48658  
AT4G08500,AT4G08470  
AT1G60940,AT1G10940 Poptr1|584467,Poptr1|349231  
AT1G61950  
AT4G09570,AT1G35670 Poptr1|703202,Poptr1|574276  
AT4G32830,AT2G25880 Poptr1|577912,Poptr1|695059  
Poptr1|646816,Poptr1|107875  
Poptr1|597745  
AT2G45490 Poptr1|685762  
AT2G26980  
AT5G45820 Poptr1|568702  
Poptr1|709332,Poptr1|350243,Poptr1|570429  
Poptr1|104062  
Poptr1|594915,Poptr1|711591  
AT5G40440 Poptr1|706774  
AT2G23030  
AT1G01140Poptr1|342837,Poptr1|700319  
AT2G31500 Poptr1|679560,Poptr1|53090  
AT4G33950 Poptr1|557335,Poptr1|704298  
AT3G04810,AT5G28290,AT1G54510  
AT5G66210 Poptr1|593843,Poptr1|693587  
AT4G14480 Poptr1|594910,Poptr1|564934  
AT2G30360 Poptr1|574497  
Poptr1|743266  
AT2G41910,AT2G05060,AT5G27790,AT2G34290,AT2G41920,AT5G12090,AT5G27510,AT2G42550,AT2G41930  
AT5G57565,AT5G57630  
AT5G56580 Poptr1|745168  
AT5G10930,AT5G25110 Poptr1|717890,Poptr1|702061  
Poptr1|571403,Poptr1|651230  
AT5G39440  
AT2G35890 Poptr1|557110  
AT5G21326  
AT3G21220,AT1G51660 Poptr1|567821,Poptr1|563479  
AT4G38230 Poptr1|54244,Poptr1|703578  
AT1G30270 Poptr1|98752,Poptr1|578866  
AT5G19360,AT5G12180 Poptr1|49092  
AT2G41860,AT3G57530 Poptr1|560525,Poptr1|701375  
AT4G24400  
AT5G67080,AT3G50310 Poptr1|562964,Poptr1|72010,Poptr1|558873  
AT1G74740,AT1G18890 Poptr1|345904,Poptr1|57559  
Poptr1|345391  
AT5G12480,AT5G19450 Poptr1|49050,Poptr1|722939  
AT4G29810 Poptr1|577971,Poptr1|685693  
AT4G14580,AT3G23000 Poptr1|354537,Poptr1|55097  
AT3G08720,AT3G08730 Poptr1|695351,Poptr1|577198  
AT3G50530 Poptr1|71979,Poptr1|53322  
AT1G54960,AT1G09000  
Poptr1|684864,Poptr1|691100  
AT1G63700  
Poptr1|573848,Poptr1|734288  
AT2G37840,AT3G53930 Poptr1|58153,Poptr1|685725  
Poptr1|551883,Poptr1|703093  
AT3G46140,AT3G45790,AT3G45670,AT3G46160  
AT4G18700 Poptr1|55888,Poptr1|705486,Poptr1|555664  
AT4G04700,AT4G04695  
Poptr1|563495  
AT5G60550,AT3G45240 Poptr1|682531  
AT2G38910 Poptr1|561185,Poptr1|58017

Poptr1|355822  
AT1G18350,AT1G73500 Poptr1|580618,Poptr1|661340  
AT3G12200  
AT3G19100,AT1G49580  
Poptr1|561361  
AT1G32320 Poptr1|356660  
AT5G20930 Poptr1|721419,Poptr1|594899  
Poptr1|101324  
Poptr1|555254,Poptr1|639689  
Poptr1|595442,Poptr1|571018,Poptr1|684585  
AT1G69220 Poptr1|698363  
Poptr1|563496  
Poptr1|345760  
AT1G23700,AT1G70430  
AT5G24430,AT3G49370  
AT1G50700,AT3G20410  
AT1G12680 Poptr1|52267  
AT4G26070  
Poptr1|647398  
Poptr1|565983,Poptr1|590251,Poptr1|354742  
AT3G63280  
AT3G44200 Poptr1|54792,Poptr1|705895  
AT4G30960 Poptr1|669608,Poptr1|681270,Poptr1|561315  
AT4G36070,AT2G17890  
AT5G66850 Poptr1|76146,Poptr1|71969  
Poptr1|554393  
AT3G61960 Poptr1|572478,Poptr1|342855  
AT1G08650,AT3G04530 Poptr1|573711,Poptr1|571090  
AT1G48260,AT3G17510 Poptr1|697782  
AT1G78290 Poptr1|650693,Poptr1|695866,Poptr1|716472,Poptr1|347410  
AT5G35410 Poptr1|736564,Poptr1|560599  
AT1G12580 Poptr1|575756,Poptr1|728605,Poptr1|350160  
AT5G14720 Poptr1|683902  
AT2G41140,AT3G56760 Poptr1|701311,Poptr1|685826  
AT1G49180 Poptr1|586818  
Poptr1|647167  
Poptr1|685947  
AT2G40560,AT2G40500,AT2G40580  
Poptr1|556871  
AT5G07070,AT5G58380 Poptr1|739040  
Poptr1|60652,Poptr1|665248  
AT1G02970 Poptr1|573439  
Poptr1|63612,Poptr1|665249  
AT2G46700 Poptr1|342832,Poptr1|700316  
AT3G01090 Poptr1|577688,Poptr1|705366,Poptr1|546638  
AT1G76040 Poptr1|52238,Poptr1|342148  
AT3G50500,AT5G66880 Poptr1|71960  
AT1G77720 Poptr1|106334,Poptr1|347296  
AT4G40010  
AT3G06030  
AT1G79640 Poptr1|708402  
AT1G05100,AT2G32510 Poptr1|568055,Poptr1|99321,Poptr1|572977,Poptr1|348618  
AT1G53570 Poptr1|558404,Poptr1|75602  
AT4G23650  
AT1G50230  
AT2G34180,AT1G29230  
AT5G55090,AT4G26890  
AT3G29160  
Poptr1|587189,Poptr1|554902,Poptr1|348294  
AT5G01810  
AT5G45810  
AT2G43930 Poptr1|559202  
AT5G63650,AT5G08590  
AT5G01820 Poptr1|577152  
Poptr1|561172,Poptr1|58021  
AT4G35310,AT2G17290  
Poptr1|562413  
AT3G10660,AT5G04870 Poptr1|725373,Poptr1|686560  
Poptr1|672762,Poptr1|650370  
Poptr1|594520  
Poptr1|659272  
AT2G25090  
AT3G15220 Poptr1|579437,Poptr1|568866  
AT5G04510,AT3G10540 Poptr1|725165  
AT3G06230  
AT5G23580 Poptr1|689207  
AT3G20860 Poptr1|684756,Poptr1|683566,Poptr1|672911,Poptr1|667424  
AT5G18310 Poptr1|571148,Poptr1|574984,Poptr1|585605,Poptr1|553245  
Poptr1|660280  
AT2G20060 Poptr1|99345  
Poptr1|570353,Poptr1|579339  
AT1G31220 Poptr1|679414



Poptr1|569856  
Poptr1|594336  
Poptr1|589102  
Poptr1|641458  
Poptr1|705671  
AT2G07698  
AT2G32960,AT1G05000 Poptr1|732326,Poptr1|552731  
AT4G03960 Poptr1|61074,Poptr1|568164  
AT3G02800,AT5G16480 Poptr1|596979  
AT5G44200 Poptr1|718228,Poptr1|689756  
AT3G05040 Poptr1|699802  
AT5G18400 Poptr1|643416,Poptr1|52056  
Poptr1|557830  
Poptr1|567068,Poptr1|564193  
AT4G01360,AT1G01550  
AT2G46080 Poptr1|108787,Poptr1|572298,Poptr1|552200  
AT3G61500  
AT1G07980 Poptr1|558256  
AT4G25610 Poptr1|575842,Poptr1|570434  
AT1G21840 Poptr1|548690  
AT4G37300 Poptr1|587036  
Poptr1|697607  
Poptr1|652518  
Poptr1|576095  
AT2G41020 Poptr1|652519  
AT3G22520,AT4G14840 Poptr1|354488  
AT5G51700  
Poptr1|575710  
AT4G28300 Poptr1|59048,Poptr1|672261  
AT1G14300 Poptr1|665838,Poptr1|582778  
AT2G45060 Poptr1|740101,Poptr1|552004  
AT4G26410 Poptr1|639592  
Poptr1|572055,Poptr1|592055,Poptr1|551797  
AT5G43130,AT1G27720 Poptr1|551795  
AT2G38760 Poptr1|683560  
AT1G68090 Poptr1|566394,Poptr1|354340  
AT5G10220,AT5G10230,AT5G65020 Poptr1|650723,Poptr1|654779  
AT2G38750 Poptr1|690876  
AT5G12380 Poptr1|64649  
Poptr1|547838,Poptr1|555013  
Poptr1|575473,Poptr1|569376,Poptr1|580629  
AT1G35720 Poptr1|643752  
AT1G58230 Poptr1|551710  
AT1G58227 Poptr1|551712  
Poptr1|72181,Poptr1|643949,Poptr1|643951  
AT3G18524 Poptr1|569858  
AT4G33690 Poptr1|550052  
Poptr1|660535  
Poptr1|660537,Poptr1|569843  
AT1G17210  
AT1G48950 Poptr1|703761  
Poptr1|595311,Poptr1|71909  
Poptr1|582577  
AT2G17650 Poptr1|558762  
AT1G21540,AT1G21530,AT1G77240  
AT1G65890,AT1G65880,AT1G68270,AT1G66120  
Poptr1|581281,Poptr1|587835,Poptr1|587666,Poptr1|584333  
Poptr1|560363,Poptr1|717412,Poptr1|701306,Poptr1|592805,Poptr1|552859,Poptr1|552855,Poptr1|55602  
3,Poptr1|71873,Poptr1|560365,Poptr1|587464,Poptr1|645154  
AT3G16910 Poptr1|564415  
AT5G16370,AT5G16340,AT1G75960  
Poptr1|592954,Poptr1|581020,Poptr1|671065,Poptr1|571619,Poptr1|571605,Poptr1|571620,Poptr1|58266  
2,Poptr1|746229,Poptr1|575865  
AT1G76290  
AT1G20560 Poptr1|342119,Poptr1|73149  
AT2G40780 Poptr1|704222  
AT5G11010Poptr1|570022  
AT3G55510 Poptr1|696932  
Poptr1|567563  
AT2G18220 Poptr1|555269,Poptr1|547680  
AT4G10080  
AT4G13530 Poptr1|592378  
Poptr1|569420,Poptr1|704094  
AT5G40900  
AT2G02060,AT1G14590 Poptr1|345358  
Poptr1|347778  
AT1G28710,AT1G28700,AT1G28695 Poptr1|347777,Poptr1|59393,Poptr1|100920  
AT5G44820,AT4G19970,AT4G15970  
AT3G48550 Poptr1|662156,Poptr1|575361  
AT1G55750,AT3G61420 Poptr1|558396,Poptr1|75597  
AT1G09270 Poptr1|570700  
AT3G05720

AT5G03070 Poptr1|702716,Poptr1|576659  
AT1G02690,AT4G02150  
AT4G16143,AT3G06720  
Poptr1|103516,Poptr1|703707,Poptr1|581818,Poptr1|697774,Poptr1|699703,Poptr1|690234,Poptr1|73174  
5,Poptr1|552496  
AT1G32880,AT5G52000,AT5G49310  
Poptr1|596151  
AT2G07687 Poptr1|676931  
AT5G04900 Poptr1|563522  
AT4G13250  
Poptr1|737586  
Poptr1|679825  
AT5G12400 Poptr1|557898  
AT5G22760,AT5G35210 Poptr1|556935  
Poptr1|556934,Poptr1|549040  
AT5G06280,AT3G52520 Poptr1|556672,Poptr1|576529  
Poptr1|564273,Poptr1|698376  
AT1G13930,AT2G03440  
AT5G65540 Poptr1|53441  
AT5G18580 Poptr1|54955,Poptr1|60581  
AT2G36145 Poptr1|695178  
AT5G58760 Poptr1|691359  
AT4G26980 Poptr1|568556  
AT2G31270 Poptr1|692891,Poptr1|694754  
Poptr1|545080  
AT3G54710  
AT3G60150,AT2G44525 Poptr1|732663  
Poptr1|676786  
AT1G50000 Poptr1|707454  
Poptr1|642117,Poptr1|649703  
Poptr1|590813  
AT2G26930 Poptr1|650358,Poptr1|640725  
Poptr1|727333,Poptr1|65757  
AT1G01110 Poptr1|731448  
AT4G10640 Poptr1|700760,Poptr1|591653,Poptr1|569623,Poptr1|591652  
AT4G00820  
Poptr1|664183,Poptr1|644646  
Poptr1|647714,Poptr1|727702  
AT3G17660 Poptr1|661406  
AT5G54310  
Poptr1|660429  
Poptr1|582098,Poptr1|726955  
Poptr1|576641  
AT2G28540  
AT5G60170,AT3G45630 Poptr1|723368  
AT2G31250  
Poptr1|642159,Poptr1|54575  
AT1G09940  
AT1G58290 Poptr1|710027  
AT2G26590  
Poptr1|560698,Poptr1|591630,Poptr1|669723,Poptr1|101556,Poptr1|349335,Poptr1|669724,Poptr1|57888  
4,Poptr1|591631,Poptr1|592669,Poptr1|579291  
AT5G02520 Poptr1|584670,Poptr1|545573,Poptr1|107243  
Poptr1|569395  
AT2G39530 Poptr1|588729  
AT5G16630 Poptr1|545464  
AT3G14590,AT1G53590 Poptr1|550330  
AT1G43580 Poptr1|559388,Poptr1|692794  
AT3G27310 Poptr1|722819,Poptr1|691457  
Poptr1|584780,Poptr1|64884  
AT5G05690 Poptr1|353665,Poptr1|353668,Poptr1|659523  
Poptr1|580101,Poptr1|589983,Poptr1|550774  
AT1G65670,AT4G15300,AT3G30290,AT4G15393,AT4G15396,AT4G15310,AT1G78490,AT5G48000,AT3G44970,AT1  
G55940  
Poptr1|594989,Poptr1|72940  
Poptr1|703119,Poptr1|551854  
AT2G42850 Poptr1|347058  
Poptr1|697487,Poptr1|549346,Poptr1|64586,Poptr1|64587,Poptr1|594988,Poptr1|556724  
AT2G32440,AT1G05160 Poptr1|571955,Poptr1|688380  
AT1G12740 Poptr1|63589,Poptr1|554319  
AT4G36380 Poptr1|76364  
Poptr1|355794  
Poptr1|559753  
Poptr1|577166  
Poptr1|551333  
AT3G30180,AT5G38970 Poptr1|690391,Poptr1|545973  
AT1G73340 Poptr1|585891  
AT2G29090 Poptr1|64359,Poptr1|723222  
AT1G19630 Poptr1|346789  
Poptr1|747568  
AT3G13730 Poptr1|678468,Poptr1|703918  
Poptr1|641396

Poptr1|580996,Poptr1|748604,Poptr1|678966,Poptr1|64656,Poptr1|102757  
AT3G50660 Poptr1|346415,Poptr1|719487  
AT5G14400 Poptr1|49178  
AT3G19270 Poptr1|704322  
AT4G19230,AT5G45340 Poptr1|596860  
Poptr1|688360  
AT5G66810 Poptr1|51844  
AT1G13030 Poptr1|696324  
Poptr1|695912  
AT3G50690 Poptr1|593953,Poptr1|53368  
AT5G59350  
AT2G39560 Poptr1|558090,Poptr1|549186,Poptr1|656081,Poptr1|675626  
AT5G66000  
AT4G35510,AT2G17540 Poptr1|558789,Poptr1|674261  
AT5G55670  
AT1G13190 Poptr1|565962  
Poptr1|568891  
Poptr1|568892  
AT1G53140  
AT1G48460 Poptr1|677769  
AT5G63040 Poptr1|728473  
AT4G37210 Poptr1|76212,Poptr1|651021  
Poptr1|76211  
AT5G01650 Poptr1|668121,Poptr1|688852,Poptr1|653170  
Poptr1|668130,Poptr1|668126,Poptr1|668125,Poptr1|695361  
AT5G57170 Poptr1|579029,Poptr1|652860  
AT3G51660 Poptr1|577083,Poptr1|653173  
Poptr1|652756,Poptr1|576333  
AT3G52105 Poptr1|641367,Poptr1|557769  
Poptr1|577381  
AT1G64190,AT5G41670 Poptr1|548377,Poptr1|343671  
AT3G02360 Poptr1|694086,Poptr1|544734,Poptr1|704127  
Poptr1|345228  
AT3G05780,AT3G05790,AT5G26860 Poptr1|570716,Poptr1|581957  
AT5G47040 Poptr1|689465,Poptr1|704015  
Poptr1|107657,Poptr1|590731  
AT5G54790  
Poptr1|661102,Poptr1|571503  
AT3G20557,AT1G50930  
AT3G21710 Poptr1|572946,Poptr1|552802  
AT4G29500  
AT4G29490 Poptr1|653293  
AT5G10210,AT5G65030 Poptr1|558541,Poptr1|562606  
AT1G04230,AT5G43720 Poptr1|657234,Poptr1|726445  
Poptr1|676923  
Poptr1|666315  
AT1G18270 Poptr1|666316  
Poptr1|733115  
Poptr1|712158  
Poptr1|691247  
AT3G26080,AT3G26070  
Poptr1|554206  
Poptr1|581236,Poptr1|581235  
AT5G61290,AT5G07800 Poptr1|699468  
AT1G63390 Poptr1|569953  
AT1G65860,AT1G62540,AT1G62560,AT1G62570,AT1G12140,AT1G12130,AT1G12160,AT1G63340,AT1G62580,AT1  
G12200  
AT1G63370,AT1G62620,AT1G62600  
AT1G63310 Poptr1|691915,Poptr1|569241  
AT1G60530  
Poptr1|349308  
Poptr1|645730,Poptr1|592435,Poptr1|747362  
Poptr1|646706,Poptr1|48703  
Poptr1|60740  
Poptr1|645731,Poptr1|587864,Poptr1|675203  
AT1G60500,AT1G60540  
Poptr1|747364  
Poptr1|657781  
AT1G48300 Poptr1|552614  
AT5G26980,AT3G05710 Poptr1|744587  
AT4G02195 Poptr1|572657,Poptr1|348302  
AT1G42970 Poptr1|550745,Poptr1|685470  
AT1G12900  
AT3G26650 Poptr1|348486,Poptr1|572827  
AT1G26170 Poptr1|566708,Poptr1|354064  
Poptr1|576589,Poptr1|593711,Poptr1|595754,Poptr1|653733,Poptr1|595752,Poptr1|576588,Poptr1|55107  
2,Poptr1|579370,Poptr1|658407,Poptr1|579368,Poptr1|566128,Poptr1|579369,Poptr1|748928,Poptr1|579367,Poptr1|5  
58101,Poptr1|566130  
AT3G46860  
AT5G43570,AT3G50020,AT5G43580  
AT2G38900,AT2G38870 Poptr1|674768,Poptr1|660854,Poptr1|568811,Poptr1|589027  
AT5G11090,AT5G25280 Poptr1|683096,Poptr1|561939

Poptr1|578832,Poptr1|745625  
AT5G20370  
Poptr1|672953,Poptr1|578831  
AT1G28530 Poptr1|674306,Poptr1|555735  
AT1G64550 Poptr1|683644  
Poptr1|697746,Poptr1|584435  
AT5G09930,AT5G64840 Poptr1|718920,Poptr1|71732  
Poptr1|560134  
Poptr1|585436,Poptr1|584964  
AT5G60790  
Poptr1|673851  
AT3G54540 Poptr1|353106,Poptr1|725221  
Poptr1|107732  
Poptr1|590331  
AT5G50340 Poptr1|691302  
AT3G14120 Poptr1|561958,Poptr1|577958,Poptr1|552673,Poptr1|745842  
AT2G16940 Poptr1|649194,Poptr1|648812  
AT5G09880 Poptr1|717974,Poptr1|716366  
AT5G11890Poptr1|736897,Poptr1|561659  
AT1G17620 Poptr1|592766,Poptr1|593108,Poptr1|597627  
AT3G21465,AT4G15640 Poptr1|565360  
AT3G56680,AT2G40960 Poptr1|576127,Poptr1|583362,Poptr1|652547  
AT5G05100,AT3G10770  
Poptr1|660172,Poptr1|696992  
AT1G51310 Poptr1|549254  
Poptr1|557848  
AT1G61000 Poptr1|709685  
AT3G26560 Poptr1|569452,Poptr1|586590  
AT1G26370  
Poptr1|65139  
Poptr1|679561  
Poptr1|586594  
AT1G27900  
AT5G14900  
AT4G18465 Poptr1|693966  
Poptr1|741453,Poptr1|580734,Poptr1|659338  
AT4G16680  
Poptr1|575527  
Poptr1|659337  
AT1G32490,AT2G35340  
AT2G47680  
Poptr1|549187,Poptr1|580733  
AT5G10370,AT4G01020 Poptr1|71598  
Poptr1|564308  
Poptr1|567085,Poptr1|679563  
AT1G33390 Poptr1|552479  
AT5G13010  
AT2G47250,AT3G62310 Poptr1|57166,Poptr1|348376  
Poptr1|551303  
AT1G76730 Poptr1|714774  
AT3G17340 Poptr1|724002  
AT4G29010 Poptr1|592531,Poptr1|689104  
Poptr1|107521  
Poptr1|346190,Poptr1|712380  
Poptr1|584348,Poptr1|644770,Poptr1|554732  
AT3G06860 Poptr1|725675,Poptr1|596130  
AT3G15290 Poptr1|742962  
AT5G43280 Poptr1|548063  
Poptr1|104753  
Poptr1|579162,Poptr1|596131  
Poptr1|590655,Poptr1|581707  
Poptr1|108080,Poptr1|590665  
AT4G16800  
Poptr1|590523  
AT3G05300  
Poptr1|565482  
Poptr1|699820,Poptr1|742075  
AT5G28050  
Poptr1|590392  
Poptr1|583079  
AT1G34380 Poptr1|592222  
AT5G02850 Poptr1|576638  
AT3G55080 Poptr1|562899,Poptr1|353467  
Poptr1|349752,Poptr1|356486  
Poptr1|104367  
Poptr1|349751  
Poptr1|592245  
AT4G17410,AT5G47430  
Poptr1|591852  
AT5G13720 Poptr1|650015  
AT4G19390 Poptr1|742660  
AT1G32583 Poptr1|351246

AT4G24972 Poptr1|575403,Poptr1|570310  
Poptr1|552838  
Poptr1|353028  
AT4G14070,AT3G23790 Poptr1|674999,Poptr1|65033,Poptr1|703885  
AT3G05210 Poptr1|703687  
AT5G56130 Poptr1|691975  
AT3G51780 Poptr1|688843  
Poptr1|65414  
AT5G62100,AT5G07220 Poptr1|699276,Poptr1|688606  
AT5G40630,AT5G14360 Poptr1|64869  
Poptr1|709451,Poptr1|350168  
Poptr1|706604,Poptr1|557651  
AT5G52060  
AT1G30480 Poptr1|108017,Poptr1|105838,Poptr1|103108,Poptr1|581831,Poptr1|75732,Poptr1|353565,Poptr1|640294,  
Poptr1|588062,Poptr1|680821,Poptr1|49412  
Poptr1|568633,Poptr1|675400  
AT5G37530 Poptr1|714208  
AT5G11650Poptr1|344658,Poptr1|689009  
Poptr1|597426  
AT1G18360,AT1G73480 Poptr1|704109,Poptr1|661356  
Poptr1|721190  
Poptr1|354126  
AT5G34860  
AT2G06908  
AT2G14570 Poptr1|731588,Poptr1|342954,Poptr1|98757  
AT1G43660 Poptr1|551077  
AT2G15020 Poptr1|557459  
AT1G35440 Poptr1|658560,Poptr1|696432  
AT2G26430 Poptr1|659826,Poptr1|344918  
AT5G45190,AT4G19600  
Poptr1|712730,Poptr1|683630  
AT1G27630 Poptr1|692934  
AT4G19560 Poptr1|562865,Poptr1|71851  
AT1G78210 Poptr1|551581  
AT1G72620,AT1G17430 Poptr1|63661  
AT4G39955 Poptr1|75709,Poptr1|694310,Poptr1|71626  
AT5G09430 Poptr1|577405,Poptr1|65109  
AT4G33180,AT5G21950 Poptr1|653796  
Poptr1|568969  
Poptr1|711541  
Poptr1|682550  
Poptr1|345467  
AT1G04480,AT2G33370,AT3G04400  
Poptr1|591181  
Poptr1|546168,Poptr1|591599,Poptr1|567033,Poptr1|594144,Poptr1|595226,Poptr1|554454  
AT5G05810  
AT1G04360,AT5G43420 Poptr1|551052  
Poptr1|568751  
AT3G60966  
AT4G35480,AT2G17450  
AT1G49230 Poptr1|65144,Poptr1|585933  
AT4G17920 Poptr1|349900,Poptr1|590023  
AT1G49200,AT1G49220,AT1G49210,AT3G18773  
Poptr1|346646,Poptr1|73090  
AT4G35840,AT2G17730  
Poptr1|571902,Poptr1|571907,Poptr1|574478  
AT2G47560,AT3G62690  
Poptr1|53283,Poptr1|716114  
AT4G33565 Poptr1|577362,Poptr1|562405  
AT3G43430,AT5G20885 Poptr1|578029,Poptr1|717609  
AT2G28920 Poptr1|550467,Poptr1|699205  
AT5G66070 Poptr1|746418,Poptr1|346337  
AT1G24580  
AT3G11110 Poptr1|353702  
Poptr1|349862,Poptr1|356879,Poptr1|567435,Poptr1|588735,Poptr1|567436,Poptr1|588736,Poptr1|56388  
9,Poptr1|352014  
Poptr1|567883,Poptr1|567882,Poptr1|563561,Poptr1|353234,Poptr1|567884  
Poptr1|568906,Poptr1|579471  
AT5G27420,AT3G05200 Poptr1|595571,Poptr1|662781  
AT5G47610,AT4G17245 Poptr1|550497,Poptr1|569229  
AT2G27940  
AT5G01880 Poptr1|571663,Poptr1|738704  
AT3G16720 Poptr1|595864,Poptr1|725649,Poptr1|596113  
AT5G58580 Poptr1|557654,Poptr1|549430  
AT2G35420 Poptr1|585932

AT2G46160,AT3G61550 Poptr1|644532,Poptr1|57056  
AT1G53010 Poptr1|356452,Poptr1|349717  
AT1G76410,AT1G20823 Poptr1|550739,Poptr1|559985  
AT5G06490 Poptr1|355244  
Poptr1|65683  
AT3G10910,AT5G05280  
AT2G35910 Poptr1|58024,Poptr1|352160  
AT2G34000  
AT4G15975 Poptr1|73091  
AT5G07040 Poptr1|350909,Poptr1|584783,Poptr1|547786  
AT1G22500,AT1G72200 Poptr1|651234  
Poptr1|584601  
Poptr1|593329,Poptr1|562654,Poptr1|558588,Poptr1|558589,Poptr1|562655,Poptr1|562656  
AT3G03550,AT5G17600 Poptr1|56761,Poptr1|574023  
Poptr1|700192,Poptr1|552111  
AT2G37580 Poptr1|693200  
AT4G24015 Poptr1|63397,Poptr1|693365  
AT3G19140,AT3G14320  
AT5G42200 Poptr1|559879,Poptr1|642904  
Poptr1|548737  
Poptr1|677725  
AT2G42350,AT2G42360  
AT2G18670,AT4G30370 Poptr1|578660,Poptr1|352425  
AT1G74410  
AT5G41400 Poptr1|640458,Poptr1|712344  
AT3G18930 Poptr1|557309  
AT2G20030,AT4G28890 Poptr1|587984,Poptr1|578510,Poptr1|578072,Poptr1|352780  
Poptr1|590021,Poptr1|349896  
AT5G10380  
Poptr1|563627,Poptr1|725472  
AT5G41450,AT5G41430,AT5G41440,AT1G51930  
AT4G00305  
AT4G38140,AT4G40070  
AT4G10150,AT4G10160  
AT4G09120,AT4G09110,AT4G09130,AT1G35330,AT2G34990,AT2G35000,AT4G09100  
AT4G11370  
Poptr1|558488,Poptr1|562550  
AT1G11690  
AT3G20350,AT1G50660 Poptr1|55840  
AT1G64690 Poptr1|554571,Poptr1|63340  
Poptr1|544815  
AT5G23395 Poptr1|567758  
AT2G15360  
AT2G03220 Poptr1|353876  
AT1G74420  
Poptr1|547770,Poptr1|555107,Poptr1|350922,Poptr1|547771,Poptr1|547773,Poptr1|555105,Poptr1|555106  
AT2G03210  
AT2G15350,AT2G15370,AT2G15390,AT1G14080,AT1G14110,AT1G14070  
AT4G32860 Poptr1|561735,Poptr1|668875  
AT1G68080 Poptr1|696484  
AT4G11250,AT5G65330,AT4G02235,AT5G39810,AT5G39750,AT5G37415,AT5G41200,AT5G40220,AT5G40120,AT5G40070,AT5G38740,AT3G18650 Poptr1|575173,Poptr1|596719  
Poptr1|595773,Poptr1|571824  
AT1G27410 Poptr1|595772,Poptr1|595771,Poptr1|588322,Poptr1|571827  
AT4G11980Poptr1|554275  
AT2G32170,AT2G32160  
Poptr1|592439,Poptr1|734605,Poptr1|734598,Poptr1|652471,Poptr1|680997,Poptr1|591288  
AT4G39250,AT2G21650 Poptr1|546662,Poptr1|557252  
Poptr1|76296  
Poptr1|352694  
AT5G58900  
Poptr1|348141  
Poptr1|653302  
AT1G19510,AT1G75250 Poptr1|551008,Poptr1|651940  
AT5G61620 Poptr1|63319  
AT5G23650  
Poptr1|710381  
Poptr1|664273,Poptr1|552606  
AT5G56840  
Poptr1|562894  
AT5G05790,AT3G11280  
AT5G08520 Poptr1|558651,Poptr1|718986  
AT4G36570  
AT1G74840,AT1G19000 Poptr1|570027,Poptr1|700892  
AT5G01200,AT2G38090  
Poptr1|735744,Poptr1|560884,Poptr1|48983,Poptr1|557961,Poptr1|656198,Poptr1|659565  
AT3G10580,AT4G09450,AT3G10585,AT3G10590,AT5G47290,AT3G10595  
AT1G49010 Poptr1|699484

Poptr1|719536,Poptr1|593927,Poptr1|649404,Poptr1|556476  
 AT1G70000 Poptr1|354829,Poptr1|698007  
 AT5G04760 Poptr1|691327  
 AT2G21440 Poptr1|556510,Poptr1|581410  
 AT4G20920,AT4G20910 Poptr1|98146,Poptr1|550609  
 AT1G72640 Poptr1|693743  
 AT1G54710 Poptr1|729689,Poptr1|595540  
 Poptr1|571476  
 Poptr1|571477,Poptr1|569070  
 AT1G03380  
 AT5G54730 Poptr1|707524,Poptr1|575175  
 AT4G16660 Poptr1|576003,Poptr1|560245  
 Poptr1|647577  
 AT1G79920,AT1G79930 Poptr1|691220,Poptr1|693705  
 AT5G49910,AT4G24280 Poptr1|596744,Poptr1|583507  
 Poptr1|713515  
 Poptr1|551591,Poptr1|666103,Poptr1|669558  
 AT1G16030 Poptr1|343843,Poptr1|587191,Poptr1|705106  
 Poptr1|563896  
 Poptr1|574721  
 AT5G09600 Poptr1|679375  
 Poptr1|574221,Poptr1|553706  
 AT2G32120 Poptr1|658534,Poptr1|657150  
 AT3G12580  
 Poptr1|107954  
 AT5G02500,AT5G02490,AT3G09440,AT1G56410  
 AT5G09590 Poptr1|686778,Poptr1|49351  
 AT4G37910  
 Poptr1|569578  
 AT1G11660 Poptr1|727116  
 Poptr1|108609  
 Poptr1|705179,Poptr1|687360,Poptr1|563887,Poptr1|656087,Poptr1|705180,Poptr1|696865  
 AT5G42020,AT5G28540 Poptr1|693359,Poptr1|548298  
 Poptr1|571044  
 Poptr1|101238,Poptr1|101246  
 AT1G09080 Poptr1|687928  
 Poptr1|555485  
 AT4G21445 Poptr1|568310  
 Poptr1|655950  
 AT1G07920,AT1G07930,AT1G07940,AT5G60390  
 AT1G35550 Poptr1|567569,Poptr1|674089,Poptr1|670300  
 Poptr1|563769,Poptr1|655949,Poptr1|719935  
 Poptr1|724917,Poptr1|567566,Poptr1|659840  
 AT5G10630 Poptr1|737500,Poptr1|583160  
 Poptr1|576658  
 Poptr1|589403  
 AT1G18070 Poptr1|743925,Poptr1|571639  
 AT5G06440,AT3G11720 Poptr1|576467  
 AT3G13990 Poptr1|63682,Poptr1|343310  
 AT1G50670 Poptr1|569139,Poptr1|550382  
 AT5G28440  
 AT3G61480,AT5G28350 Poptr1|552195  
 AT3G11100,AT5G05550 Poptr1|567243,Poptr1|564061  
 AT1G54060  
 AT3G58630 Poptr1|548550,Poptr1|554278  
 AT3G14180 Poptr1|343873,Poptr1|62912  
 AT4G34680  
 Poptr1|64058  
 AT4G36620,AT3G50870,AT2G18380  
 AT1G08000,AT1G08010,AT2G28340 Poptr1|595069  
 AT3G20750 Poptr1|351064  
 Poptr1|62766  
 AT3G54810 Poptr1|344900,Poptr1|659889  
 AT5G25830 Poptr1|102667,Poptr1|578047,Poptr1|561742  
 Poptr1|713121  
 AT3G06740  
 AT3G45170 Poptr1|664385,Poptr1|348308  
 AT3G51080,AT5G66320 Poptr1|593881,Poptr1|719658  
 AT2G45050,AT3G60530 Poptr1|684368,Poptr1|677594  
 Poptr1|704424  
 AT4G36240  
 Poptr1|650631,Poptr1|571221  
 AT3G24050 Poptr1|690928,Poptr1|693231  
 AT5G26930  
 Poptr1|649333  
 AT4G26150,AT5G56860 Poptr1|653902,Poptr1|577946  
 AT5G49300 Poptr1|60006  
 AT4G32890  
 AT5G26040 Poptr1|352692  
 AT4G01630 Poptr1|552404

AT2G40610 Poptr1|688083,Poptr1|665631,Poptr1|653202  
AT3G55500,AT2G39700  
AT3G60570,AT2G45110  
AT1G20190 Poptr1|709919,Poptr1|652130  
AT1G62980  
AT4G17030 Poptr1|676447  
Poptr1|576783,Poptr1|576797  
AT3G03220 Poptr1|592822,Poptr1|546535  
AT5G05290  
AT3G15370 Poptr1|743024  
Poptr1|552403  
Poptr1|356574,Poptr1|580125  
AT1G65680 Poptr1|572072  
Poptr1|350981,Poptr1|547568,Poptr1|571235  
AT3G29030 Poptr1|648472,Poptr1|556331,Poptr1|58393  
AT2G28950 Poptr1|723264,Poptr1|691396,Poptr1|682432  
AT2G37640 Poptr1|695426  
AT1G12560 Poptr1|63629  
AT5G02260  
AT5G56320  
AT2G20750  
AT2G03090  
AT4G38210 Poptr1|556752,Poptr1|595029  
AT5G39270,AT5G39290,AT5G39300,AT5G39280,AT5G39310,AT5G39260  
AT4G28250 Poptr1|675669,Poptr1|730479,Poptr1|48159  
AT1G69530,AT1G26770 Poptr1|696712,Poptr1|659295  
AT1G71790 Poptr1|714835  
AT5G11860Poptr1|554801,Poptr1|708690  
AT4G18140,AT5G46410 Poptr1|586980,Poptr1|568466  
AT1G29770,AT1G29780  
AT5G45700 Poptr1|545127,Poptr1|568661  
AT5G17870 Poptr1|681956  
AT2G45200 Poptr1|572078,Poptr1|342686  
AT2G30530 Poptr1|665901,Poptr1|571938  
AT1G30050  
Poptr1|710144,Poptr1|665900  
AT5G01970 Poptr1|577227  
AT4G02800 Poptr1|714963  
AT3G51770 Poptr1|735925,Poptr1|344321  
AT4G02680 Poptr1|710727,Poptr1|715033,Poptr1|710726  
Poptr1|577041  
AT5G58550 Poptr1|64681,Poptr1|54604  
AT1G70750 Poptr1|645234,Poptr1|714147,Poptr1|696515,Poptr1|698177  
AT1G04890  
Poptr1|593720  
AT1G18265  
AT4G13630,AT4G13160 Poptr1|668390,Poptr1|645422  
AT2G30690,AT1G08800  
Poptr1|346878,Poptr1|680553,Poptr1|586809  
AT5G16720  
AT3G25940 Poptr1|729518  
AT5G48335,AT3G07580 Poptr1|700650  
Poptr1|554140  
AT1G31480 Poptr1|574170,Poptr1|689636  
AT3G08010 Poptr1|54653,Poptr1|557786  
AT1G24350,AT1G67600 Poptr1|657401  
Poptr1|55010  
Poptr1|568517  
Poptr1|572990  
AT3G12685  
AT3G61770 Poptr1|572396,Poptr1|348080  
AT3G21610 Poptr1|572989,Poptr1|711445  
AT2G25610,AT4G32530 Poptr1|341802,Poptr1|578160  
AT3G52210 Poptr1|659984,Poptr1|581414  
AT3G55760 Poptr1|564900  
AT1G42430 Poptr1|694897,Poptr1|710964  
Poptr1|732486  
AT2G04360  
Poptr1|571337,Poptr1|561427  
AT3G28430 Poptr1|351655,Poptr1|736659  
AT1G32760,AT4G10630 Poptr1|550442  
Poptr1|588916  
Poptr1|561500  
AT5G58530 Poptr1|649815,Poptr1|549440  
AT5G01420 Poptr1|653400,Poptr1|576474  
AT5G03870  
AT3G11773,AT5G06470  
AT2G41330,AT3G57070 Poptr1|576189,Poptr1|560412  
AT5G13810 Poptr1|684743,Poptr1|708493  
AT1G64500 Poptr1|63401,Poptr1|554508  
AT3G28850,AT5G39865 Poptr1|577620  
AT5G39800,AT5G40080 Poptr1|651238,Poptr1|652830



AT5G47570 Poptr1|704267  
AT5G26030  
AT2G30390 Poptr1|702363,Poptr1|582168  
Poptr1|561690,Poptr1|653928,Poptr1|736864  
Poptr1|594226  
Poptr1|72050  
AT5G67290 Poptr1|558391  
Poptr1|590059,Poptr1|646295  
AT2G35520,AT1G32210  
Poptr1|659398,Poptr1|668307  
AT1G65580 Poptr1|564130,Poptr1|659397  
AT1G05630,AT2G31830,AT2G43900 Poptr1|654326,Poptr1|668308  
AT3G47630 Poptr1|573189,Poptr1|63286  
Poptr1|570233,Poptr1|688530  
AT5G63400,AT5G50370  
AT2G17340,AT2G17320,AT4G35360 Poptr1|595023,Poptr1|648904  
AT1G08710 Poptr1|56743  
AT2G33800 Poptr1|713937,Poptr1|580919  
AT4G38440 Poptr1|557035  
Poptr1|738167,Poptr1|582166,Poptr1|740734,Poptr1|574236  
AT1G30690 Poptr1|708068  
Poptr1|72889  
AT4G09160,AT1G72160 Poptr1|738782,Poptr1|592303  
AT3G51670 Poptr1|58227  
AT1G72150,AT1G22530  
AT2G15670  
AT5G51430 Poptr1|554180  
Poptr1|571820,Poptr1|645822  
Poptr1|594216  
Poptr1|588755  
Poptr1|560861  
AT5G13570 Poptr1|567608,Poptr1|563741  
AT1G49350 Poptr1|694147,Poptr1|694148  
AT1G02470  
AT4G01883  
AT1G02475 Poptr1|572557,Poptr1|692238  
AT4G33640  
Poptr1|577296,Poptr1|718508  
AT3G60000,AT2G44190 Poptr1|560048,Poptr1|672033  
AT1G49890,AT3G19570 Poptr1|65272,Poptr1|54542  
AT5G43160 Poptr1|347597  
AT4G30740,AT4G30710,AT2G24070 Poptr1|653603,Poptr1|737954  
AT2G20815  
AT4G25190 Poptr1|356784  
AT4G30780,AT2G24100 Poptr1|737941,Poptr1|561364  
Poptr1|690835,Poptr1|554909  
AT1G54300,AT3G05770 Poptr1|595262,Poptr1|570717  
AT3G01420 Poptr1|696625  
AT1G73680 Poptr1|355513  
AT3G59600,AT1G54250 Poptr1|740588  
Poptr1|586131,Poptr1|592163,Poptr1|730147  
AT1G07310 Poptr1|697595,Poptr1|706032  
Poptr1|567308,Poptr1|656208  
AT5G23950  
Poptr1|728541  
Poptr1|573280,Poptr1|582372,Poptr1|573285,Poptr1|582369  
AT2G30920 Poptr1|572336  
Poptr1|354490  
AT1G05410 Poptr1|55125  
AT4G14010 Poptr1|597078,Poptr1|586606,Poptr1|65039,Poptr1|597077  
AT5G18540 Poptr1|704368  
AT5G48390 Poptr1|573180  
AT2G41160,AT3G56740 Poptr1|57921,Poptr1|717498  
AT3G44380 Poptr1|691325  
Poptr1|570389  
AT5G07360  
Poptr1|575492  
AT3G48425  
Poptr1|575282  
Poptr1|570196  
AT1G15880 Poptr1|554868,Poptr1|708590  
AT4G16180  
AT4G16170 Poptr1|656631,Poptr1|698323  
AT4G12080,AT4G22770 Poptr1|644342,Poptr1|663815,Poptr1|646504,Poptr1|581183  
AT2G33620  
AT1G63480,AT1G63470 Poptr1|691137,Poptr1|343629  
AT5G28590,AT3G04590 Poptr1|729872,Poptr1|586801  
AT5G62260 Poptr1|570570  
AT2G36560  
AT4G00200  
AT5G46640,AT4G17950 Poptr1|580085,Poptr1|676539  
Poptr1|346537,Poptr1|52284,Poptr1|677520

Poptr1|580084  
 Poptr1|556937,Poptr1|594846  
 Poptr1|554255  
 AT2G45850,AT3G61310 Poptr1|572234,Poptr1|347963  
 AT5G51590,AT4G25320  
 AT1G16420  
 AT1G79320,AT1G79330,AT1G79340 Poptr1|567122,Poptr1|564149  
 AT5G04200 Poptr1|576058,Poptr1|652499  
 AT1G79310  
 Poptr1|561234  
 AT2G41940 Poptr1|352219  
 Poptr1|566325  
 AT1G10522 Poptr1|658612  
 AT2G02390,AT2G02380 Poptr1|742620  
 Poptr1|56973  
 Poptr1|583022,Poptr1|103587  
 Poptr1|572682  
 Poptr1|106633,Poptr1|353149  
 Poptr1|546322  
 AT2G31320 Poptr1|684602  
 AT5G22470  
 Poptr1|557064  
 AT4G02390  
 AT5G23080 Poptr1|569839  
 AT5G64930 Poptr1|654863,Poptr1|558613,Poptr1|558612,Poptr1|654864  
 AT2G31190,Poptr1|551040,Poptr1|72882  
 Poptr1|566555  
 AT1G24540 Poptr1|345520,Poptr1|583115  
 Poptr1|558712,Poptr1|354209  
 AT1G66030  
 Poptr1|55700  
 Poptr1|342257,Poptr1|551071,Poptr1|595766,Poptr1|588365,Poptr1|72854  
 Poptr1|649120  
 AT5G51900 Poptr1|593756  
 AT1G13140,AT1G13150,AT3G26125  
 AT5G02900,AT4G39510,AT4G32170,AT4G39500,AT1G47620,AT2G23180,AT4G39480,AT4G39490,AT2G21910,AT5  
 G52320,AT1G65340,AT1G57750 Poptr1|575715,Poptr1|581333,Poptr1|75847  
 AT5G08250,AT5G23190 Poptr1|558688,Poptr1|562811  
 Poptr1|570553,Poptr1|105731  
 Poptr1|357124,Poptr1|575718  
 AT2G27690 Poptr1|649118,Poptr1|594809,Poptr1|571386  
 Poptr1|678684  
 AT2G45970 Poptr1|572270  
 Poptr1|654348  
 AT1G34540,AT3G56630 Poptr1|102197,Poptr1|576119,Poptr1|351364  
 AT1G63710 Poptr1|712508  
 AT5G58860 Poptr1|64287,Poptr1|557951  
 Poptr1|730915,Poptr1|663843  
 Poptr1|64647  
 AT1G01600,AT4G00360  
 AT3G01900 Poptr1|549695,Poptr1|356043  
 AT2G45510,AT2G44890 Poptr1|56982,Poptr1|572135  
 AT5G63450,AT3G48520  
 AT1G69500 Poptr1|564227  
 Poptr1|71541,Poptr1|51676,Poptr1|703937,Poptr1|575263  
 Poptr1|668457  
 Poptr1|668458  
 Poptr1|736187  
 Poptr1|577512  
 AT3G01460 Poptr1|668459  
 AT5G21160,Poptr1|723469  
 Poptr1|588463,Poptr1|705931  
 AT1G53200 Poptr1|346042  
 AT1G31130  
 Poptr1|591350,Poptr1|551376,Poptr1|347180,Poptr1|714634,Poptr1|654652,Poptr1|562471,Poptr1|55930  
 2  
 AT5G44860,AT4G19950 Poptr1|570604,Poptr1|575650  
 AT4G35730 Poptr1|554016  
 AT3G15490 Poptr1|568939  
 Poptr1|696559,Poptr1|678744  
 AT2G14830,AT1G51900 Poptr1|545044  
 AT1G25420 Poptr1|658881  
 Poptr1|580788,Poptr1|545332  
 AT4G29440,AT2G19710  
 AT1G34220 Poptr1|592195  
 Poptr1|653299  
 AT1G13340 Poptr1|698250  
 AT1G55900 Poptr1|642296,Poptr1|568582  
 AT5G52430,AT4G25620 Poptr1|728536  
 Poptr1|102279,Poptr1|343640,Poptr1|63524  
 AT1G63720  
 AT1G71260 Poptr1|553773

AT1G14410,AT2G02740 Poptr1|658581,Poptr1|564801  
AT3G09210 Poptr1|560859  
AT3G47980,AT5G62720 Poptr1|733150  
Poptr1|569997  
AT1G55840 Poptr1|707697  
AT5G47730 Poptr1|688632,Poptr1|695684  
Poptr1|575962  
AT1G12050 Poptr1|652386  
Poptr1|597500  
AT5G35460 Poptr1|736912,Poptr1|561026  
Poptr1|705017,Poptr1|592557,Poptr1|580191,Poptr1|579270,Poptr1|583169  
AT4G31360,AT2G24440  
AT3G51390 Poptr1|554019,Poptr1|590272,Poptr1|356806,Poptr1|593030,Poptr1|585672  
AT1G26190 Poptr1|55299,Poptr1|345216  
AT1G73980 Poptr1|689885  
Poptr1|545367  
AT1G66940 Poptr1|747167,Poptr1|589690,Poptr1|589678,Poptr1|580823,Poptr1|553068,Poptr1|107479,Poptr1|10318  
6,Poptr1|587884,Poptr1|545370  
AT1G71865 Poptr1|678080,Poptr1|665792  
AT2G43190 Poptr1|62849  
AT4G11160  
AT1G17220 Poptr1|687627,Poptr1|65689  
Poptr1|350312  
Poptr1|709213  
Poptr1|350311  
AT4G39910,AT2G22310 Poptr1|71633,Poptr1|718773  
AT1G70350  
AT5G47455,AT4G17310 Poptr1|589737,Poptr1|64920  
AT5G11630Poptr1|344662  
Poptr1|702134  
Poptr1|102304  
Poptr1|678683  
Poptr1|61140,Poptr1|61571,Poptr1|54921,Poptr1|61604,Poptr1|61054,Poptr1|61493,Poptr1|62107,Poptr1|  
106249,Poptr1|105695,Poptr1|61428,Poptr1|101426,Poptr1|106378,Poptr1|100555,Poptr1|61139,Poptr1|61000,Poptr  
1|97716,Poptr1|104708,Poptr1|102268,Poptr1|100371,Poptr1|58943,Poptr1|104099  
Poptr1|661808  
Poptr1|99668  
Poptr1|101136,Poptr1|103997,Poptr1|105426,Poptr1|57495,Poptr1|104064,Poptr1|106309,Poptr1|102178,  
Poptr1|100506,Poptr1|106605,Poptr1|107097,Poptr1|101421,Poptr1|106900,Poptr1|61128,Poptr1|107749,Poptr1|616  
91,Poptr1|61147,Poptr1|61603,Poptr1|651085,Poptr1|62106  
AT1G26220 Poptr1|564462  
AT1G32070 Poptr1|672550,Poptr1|583001,Poptr1|577212  
AT3G01430 Poptr1|590107,Poptr1|554112  
Poptr1|561946  
AT3G48020,AT5G62860 Poptr1|678899,Poptr1|570068,Poptr1|666443  
Poptr1|103392  
AT5G43630 Poptr1|564923,Poptr1|354560,Poptr1|566137  
AT2G26780 Poptr1|691493  
Poptr1|595213  
AT4G34890,AT4G34900 Poptr1|54667  
AT3G04390  
AT2G27150,AT1G04580,AT5G20960,AT3G43600 Poptr1|588889,Poptr1|54299,Poptr1|59838  
Poptr1|584085,Poptr1|587458  
Poptr1|580532,Poptr1|588038  
Poptr1|588887  
Poptr1|586311  
AT4G37500 Poptr1|580533  
AT1G02590 Poptr1|107952  
AT3G52050 Poptr1|745062  
AT1G27430,AT1G24300 Poptr1|549728,Poptr1|64985,Poptr1|102692,Poptr1|703902,Poptr1|549731  
AT5G22210 Poptr1|556820,Poptr1|594960  
AT1G64355 Poptr1|640373  
AT3G26115Poptr1|565966  
AT1G59600 Poptr1|644031  
Poptr1|580780  
AT5G46530  
AT5G18970 Poptr1|588441  
AT1G04560 Poptr1|565838  
AT1G29520 Poptr1|727873,Poptr1|746786  
Poptr1|657644,Poptr1|565301  
Poptr1|585722,Poptr1|546148,Poptr1|557164  
AT2G16530,AT1G72590  
AT3G43840  
AT5G12320 Poptr1|641461,Poptr1|697457  
Poptr1|595049  
AT2G17390,AT4G35450  
Poptr1|659469  
Poptr1|741910,Poptr1|595047  
Poptr1|573779  
Poptr1|663018,Poptr1|573780

Poptr1|663017  
 Poptr1|571137  
 AT5G18410 Poptr1|573781,Poptr1|663019  
 AT5G03455 Poptr1|676077  
 AT1G23740 Poptr1|686226  
 Poptr1|589252  
 Poptr1|49463  
 AT4G13010 Poptr1|106183,Poptr1|549573,Poptr1|549572,Poptr1|583026  
 AT3G15090 Poptr1|691854  
 AT1G01690 Poptr1|572260  
 AT1G43690 Poptr1|684539,Poptr1|694621  
 AT5G14410 Poptr1|575258,Poptr1|549580  
 AT2G07110  
 AT3G46210 Poptr1|578064,Poptr1|352776  
 Poptr1|723010  
 AT5G66750 Poptr1|719482  
 Poptr1|581257,Poptr1|554189  
 AT2G25170 Poptr1|702055,Poptr1|561972  
 AT2G18760 Poptr1|559717  
 Poptr1|665325  
 Poptr1|641046  
 AT3G12810 Poptr1|548778,Poptr1|553466  
 Poptr1|565767  
 AT3G57300 Poptr1|576236,Poptr1|351483  
 AT3G06400,AT5G18620 Poptr1|696240  
 AT2G46020 Poptr1|731124  
 Poptr1|569836  
 Poptr1|641049  
 Poptr1|108735  
 AT1G48310  
 Poptr1|665326  
 Poptr1|641045  
 Poptr1|657056  
 AT2G02090 Poptr1|566361  
 AT5G63950 Poptr1|71553,Poptr1|562497  
 AT5G07810 Poptr1|355730  
 AT4G31900  
 AT2G13370 Poptr1|723011  
 AT5G19310,AT3G06010 Poptr1|566280,Poptr1|354439  
 AT2G44980 Poptr1|591700  
 Poptr1|341711  
 AT3G19210 Poptr1|581508  
 AT3G54280 Poptr1|688016  
 AT1G03750  
 AT1G08600  
 Poptr1|641047  
 AT5G44800  
 Poptr1|641048  
 AT1G12330 Poptr1|97324,Poptr1|693484  
 AT3G28760 Poptr1|58373  
 Poptr1|554810  
 AT2G21180Poptr1|697215,Poptr1|713198  
 AT1G67785 Poptr1|700972  
 AT2G14870,AT5G12190 Poptr1|649901,Poptr1|706504  
 AT1G71950 Poptr1|748592,Poptr1|665763,Poptr1|592238  
 AT2G03600,AT2G03590,AT2G03530 Poptr1|564296,Poptr1|564295  
 AT2G03520  
 AT1G26440  
 AT1G69430,AT1G26650 Poptr1|353888  
 Poptr1|584020  
 AT4G35490 Poptr1|554005  
 Poptr1|550468,Poptr1|569259  
 AT5G51610,AT1G32990  
 Poptr1|676997  
 AT1G64320,AT5G41780 Poptr1|63451,Poptr1|554464  
 AT1G64330,AT5G41790 Poptr1|554465,Poptr1|640386  
 AT5G47020 Poptr1|579833,Poptr1|597368,Poptr1|589947,Poptr1|356564,Poptr1|356560  
 AT4G32920  
 AT5G11700Poptr1|577905,Poptr1|695062  
 Poptr1|595716,Poptr1|572460  
 AT1G77760,AT1G37130 Poptr1|685276,Poptr1|551506  
 AT5G15260,AT3G01170 Poptr1|688945,Poptr1|556322  
 AT1G53885 Poptr1|349683,Poptr1|584157  
 AT4G17670,AT5G47060 Poptr1|589944,Poptr1|690016  
 AT5G65040  
 Poptr1|689538,Poptr1|551980  
 AT2G44670  
 AT1G22160,AT1G78020 Poptr1|551545,Poptr1|694525  
 AT4G39795 Poptr1|718828,Poptr1|558563  
 AT5G49120 Poptr1|703724,Poptr1|657857  
 AT5G22950 Poptr1|584444  
 AT3G45000

AT1G01630 Poptr1|46268,Poptr1|693288  
AT5G63060 Poptr1|666508  
AT1G75170 Poptr1|553349  
AT1G14820 Poptr1|581279,Poptr1|658705,Poptr1|720696,Poptr1|61229  
AT1G22180  
AT4G08690 Poptr1|559134,Poptr1|710228  
Poptr1|573988  
AT4G36640  
Poptr1|679233,Poptr1|719501,Poptr1|76289  
Poptr1|571306  
Poptr1|553186  
AT3G07140 Poptr1|577491,Poptr1|665056  
AT5G53470,AT4G27780 Poptr1|661551,Poptr1|732843  
AT5G43300 Poptr1|596929,Poptr1|548064  
AT5G41080  
AT3G02040 Poptr1|549748  
AT1G80710 Poptr1|58762  
AT3G58140  
Poptr1|103337,Poptr1|689626  
AT5G15410 Poptr1|701855  
Poptr1|353081  
AT2G28260 Poptr1|558271  
AT5G14870 Poptr1|592282  
AT5G57940 Poptr1|689158  
Poptr1|654294  
Poptr1|583117,Poptr1|579345,Poptr1|562050  
AT5G53130 Poptr1|57487,Poptr1|569505  
Poptr1|97011,Poptr1|589444  
AT5G54250 Poptr1|582088  
Poptr1|595077,Poptr1|352428,Poptr1|578656  
Poptr1|579713  
AT4G30560,AT2G23980  
Poptr1|595076  
Poptr1|589443,Poptr1|353082  
AT2G46450,AT2G46440,AT2G46430  
AT3G17690,AT3G17700 Poptr1|97013,Poptr1|743590,Poptr1|569408  
Poptr1|579714  
AT4G01010,AT1G01340 Poptr1|731332,Poptr1|552266  
AT4G30360  
AT3G48010 Poptr1|585267  
AT2G24610 Poptr1|578366  
AT1G15990,AT1G19780 Poptr1|100430,Poptr1|554889  
Poptr1|591003  
Poptr1|577709  
Poptr1|579343  
Poptr1|353715  
AT5G05490  
AT5G42655 Poptr1|347706  
Poptr1|356981,Poptr1|597350,Poptr1|586623,Poptr1|107728,Poptr1|596362  
AT3G29060 Poptr1|595347,Poptr1|577675  
AT3G23430 Poptr1|597349,Poptr1|354601,Poptr1|54969  
Poptr1|576129,Poptr1|560352  
Poptr1|560344  
AT1G69480 Poptr1|345128  
AT2G03240,AT1G14040,AT2G03250,AT2G03260 Poptr1|55395,Poptr1|587131,Poptr1|353879  
AT1G26730,AT1G35350,AT4G25350  
AT1G68740 Poptr1|591317,Poptr1|55292,Poptr1|345219  
AT1G29060,AT4G14600 Poptr1|643834,Poptr1|651229  
AT3G50460,AT3G50470,AT3G50450,AT3G50480 Poptr1|76162  
AT1G05575,AT2G31945 Poptr1|672704,Poptr1|723381,Poptr1|555253,Poptr1|547657  
AT5G28390,AT3G52660 Poptr1|735383,Poptr1|717692  
Poptr1|741791,Poptr1|721324  
AT4G00830 Poptr1|342839,Poptr1|688203  
AT4G27620,AT4G27610 Poptr1|56775,Poptr1|58933  
AT4G11080,AT4G23800 Poptr1|548360,Poptr1|693390  
AT1G03600 Poptr1|643350,Poptr1|714905  
AT2G34770 Poptr1|582602,Poptr1|550596  
AT4G20870  
Poptr1|104092,Poptr1|584972,Poptr1|585979,Poptr1|594704,Poptr1|76171,Poptr1|587549,Poptr1|100131,  
Poptr1|590935,Poptr1|574859,Poptr1|353370  
AT5G49610 Poptr1|568761,Poptr1|574858,Poptr1|72235,Poptr1|355533  
AT5G41720 Poptr1|65908  
AT3G08920 Poptr1|695377  
AT4G24750 Poptr1|570173,Poptr1|575256  
AT1G26945  
AT1G74500 Poptr1|355773,Poptr1|581363  
AT5G15160  
AT3G47710  
AT3G28857,AT5G39860 Poptr1|545751,Poptr1|58377  
Poptr1|108186  
AT5G48840 Poptr1|348951  
AT3G11590Poptr1|561459,Poptr1|576546

AT5G22310  
Poptr1|594947,Poptr1|648968  
AT4G04640 Poptr1|555320  
AT1G15700  
Poptr1|727438  
Poptr1|55743  
AT3G59840 Poptr1|591642  
AT5G41860 Poptr1|646741,Poptr1|548349  
AT5G60030  
AT5G45520 Poptr1|356295  
AT3G28770  
AT1G56660 Poptr1|573947  
AT5G59080,AT3G46880 Poptr1|650211  
AT5G02020 Poptr1|560836  
AT3G55646,AT2G39855,AT5G05965 Poptr1|698548,Poptr1|656162  
AT5G19940 Poptr1|745322  
AT5G57340 Poptr1|669415,Poptr1|704078  
AT5G58260 Poptr1|700098,Poptr1|574450  
Poptr1|706154,Poptr1|564852  
AT3G22480  
Poptr1|552227,Poptr1|57061,Poptr1|664045,Poptr1|343147  
AT5G24090 Poptr1|705038  
Poptr1|660378,Poptr1|355189,Poptr1|586583,Poptr1|586585,Poptr1|746637  
Poptr1|572335  
Poptr1|703415  
AT1G68310,AT3G09380 Poptr1|590069,Poptr1|682069  
AT1G64700 Poptr1|569284,Poptr1|595243,Poptr1|550444  
AT3G61920 Poptr1|572458,Poptr1|342845  
AT4G10910 Poptr1|548313  
AT4G29800  
AT3G63200 Poptr1|559556,Poptr1|551172  
AT2G39220,AT3G54950 Poptr1|686535,Poptr1|567600  
Poptr1|575627,Poptr1|356403  
AT1G28190 Poptr1|640148,Poptr1|554661  
AT5G12340 Poptr1|64638  
AT2G02160 Poptr1|698130,Poptr1|564751  
AT5G64690 Poptr1|585941,Poptr1|597337,Poptr1|65152  
AT1G77800 Poptr1|347311,Poptr1|72404  
AT2G04520,AT5G35680  
Poptr1|552718,Poptr1|732379  
Poptr1|572344  
Poptr1|550977  
AT5G07840 Poptr1|646379  
AT5G62210,AT5G07190 Poptr1|581332,Poptr1|575716,Poptr1|570556  
AT2G41470 Poptr1|578955,Poptr1|351616  
AT2G41440 Poptr1|567522  
AT5G62200 Poptr1|570557,Poptr1|734054,Poptr1|691312  
AT3G11540Poptr1|352484,Poptr1|576559  
AT4G28020 Poptr1|669484  
AT4G24820 Poptr1|666602,Poptr1|570209  
AT4G34265,AT2G15000 Poptr1|642049,Poptr1|649643  
AT2G42000,AT2G23240 Poptr1|556771,Poptr1|595009  
AT3G06350 Poptr1|565260,Poptr1|565769  
Poptr1|570919  
Poptr1|742170,Poptr1|699791,Poptr1|572756,Poptr1|688279  
AT5G16390  
Poptr1|665593  
AT5G15530  
Poptr1|736444,Poptr1|556403  
AT3G24490 Poptr1|553703,Poptr1|702121  
AT1G08290 Poptr1|713454  
AT1G34790 Poptr1|342488  
AT1G13290  
AT1G51220,AT3G20880  
Poptr1|554968,Poptr1|708551,Poptr1|64564  
AT3G57670 Poptr1|576326  
Poptr1|586603,Poptr1|570093,Poptr1|675040,Poptr1|573292,Poptr1|101980,Poptr1|673180  
AT2G26810  
Poptr1|578492  
AT5G05780,AT3G11270 Poptr1|698522,Poptr1|696801  
AT3G25660 Poptr1|689112  
AT4G30350  
AT5G57710 Poptr1|653660  
Poptr1|669488  
AT5G55960 Poptr1|65523  
AT2G27490 Poptr1|55541  
Poptr1|590765  
AT3G03890 Poptr1|699886,Poptr1|738466  
Poptr1|662107  
AT5G23575,AT5G08500 Poptr1|58833,Poptr1|714557  
AT3G10940 Poptr1|573846  
AT3G52180 Poptr1|659974

AT2G45990 Poptr1|700228  
AT2G33390 Poptr1|564980,Poptr1|697885  
Poptr1|577743  
AT4G25000 Poptr1|748076,Poptr1|644125,Poptr1|591946  
Poptr1|698106  
AT1G76130 Poptr1|642873  
AT1G69830  
Poptr1|582545  
AT5G49630 Poptr1|710499  
Poptr1|579398  
AT5G63850,AT5G09220 Poptr1|558464,Poptr1|562523  
Poptr1|561728,Poptr1|561727  
Poptr1|556630  
Poptr1|557088  
AT1G44100  
AT5G23810  
Poptr1|582548,Poptr1|49508,Poptr1|704509,Poptr1|642685,Poptr1|582544,Poptr1|705508,Poptr1|582546  
AT1G77380  
Poptr1|674664,Poptr1|342403,Poptr1|595874,Poptr1|595125,Poptr1|551420,Poptr1|559276,Poptr1|71457  
8  
AT1G10010,AT1G58360  
Poptr1|559649  
Poptr1|561729,Poptr1|582549,Poptr1|587692  
Poptr1|54556  
AT4G19003 Poptr1|676613  
AT3G58750,AT3G58740,AT2G42790 Poptr1|735489,Poptr1|572841  
AT5G38880 Poptr1|61041,Poptr1|60934  
Poptr1|588995  
AT5G63890 Poptr1|550607,Poptr1|690278  
AT2G30890 Poptr1|559496,Poptr1|710624,Poptr1|660544  
AT3G02980,AT5G16800 Poptr1|730252,Poptr1|665408  
AT4G14420 Poptr1|643173,Poptr1|715128,Poptr1|726372  
AT1G04340,AT5G43460 Poptr1|673177,Poptr1|726377  
AT3G23180,AT3G23190,AT3G23175  
AT3G05520 Poptr1|581880,Poptr1|687925  
Poptr1|585649,Poptr1|680784  
AT2G18710 Poptr1|561405,Poptr1|578655  
AT4G31200 Poptr1|582673,Poptr1|98485,Poptr1|61220  
Poptr1|578493  
AT3G06880 Poptr1|596141  
Poptr1|583103  
AT3G11760Poptr1|352163  
AT2G10560,AT5G04860 Poptr1|55680,Poptr1|563532,Poptr1|669059,Poptr1|595960  
AT2G25460  
AT3G02120 Poptr1|683072,Poptr1|545863  
AT1G12830 Poptr1|549768,Poptr1|597096  
AT3G15550 Poptr1|747862,Poptr1|343331,Poptr1|671574,Poptr1|640658  
AT3G15560 Poptr1|640657,Poptr1|671573  
Poptr1|578924,Poptr1|560584  
AT1G05020 Poptr1|348583,Poptr1|348584,Poptr1|573012  
AT2G25430,AT4G32285 Poptr1|737211,Poptr1|561905  
AT1G03050,AT4G02650 Poptr1|59200  
AT3G56900 Poptr1|576107  
AT5G45360 Poptr1|596870  
AT3G20720 Poptr1|569071  
Poptr1|545984  
AT1G13880,AT2G03470 Poptr1|108752,Poptr1|353918,Poptr1|566942  
AT1G26580  
AT2G18850 Poptr1|580469  
AT1G50150,AT3G19750 Poptr1|558701,Poptr1|75970  
AT2G37240 Poptr1|103415  
AT5G64710,AT5G09840 Poptr1|580004,Poptr1|65166  
AT5G35640  
Poptr1|98430,Poptr1|98427,Poptr1|672582  
Poptr1|583133  
AT5G10690 Poptr1|672581  
AT1G79010,AT1G16700 Poptr1|546062,Poptr1|649414  
AT1G53260,AT3G15000 Poptr1|583045,Poptr1|660879  
AT1G19800 Poptr1|348887  
AT2G43210 Poptr1|677478,Poptr1|594472,Poptr1|741417,Poptr1|562282  
AT4G01245,AT4G01270 Poptr1|348014,Poptr1|572307  
AT5G19300 Poptr1|698099,Poptr1|719838  
AT5G17070 Poptr1|574045  
AT5G47830 Poptr1|347630,Poptr1|591992  
AT3G06510  
Poptr1|659129  
Poptr1|659130  
AT2G16460 Poptr1|697237  
AT3G51090 Poptr1|655406  
AT3G04930,AT5G28040 Poptr1|64511  
Poptr1|545423  
AT1G28570,AT1G28580,AT1G28610,AT2G27360,AT1G28590,AT1G28600,AT1G31550,AT1G28660,AT1G28670,AT1

G28640,AT1G28650  
AT3G48460 Poptr1|699390,Poptr1|733517  
AT5G03980 Poptr1|97756,Poptr1|97757,Poptr1|97767  
AT1G09390,AT1G56670 Poptr1|690201  
AT3G62280 Poptr1|572563  
Poptr1|572566,Poptr1|559236,Poptr1|572564,Poptr1|103792  
AT3G27950  
Poptr1|103793,Poptr1|596748,Poptr1|570778,Poptr1|554987,Poptr1|65922  
AT1G67830  
Poptr1|593510,Poptr1|551457,Poptr1|710388,Poptr1|559234,Poptr1|350482,Poptr1|63270  
Poptr1|565999  
Poptr1|572567  
AT3G26430 Poptr1|566000,Poptr1|354769  
AT5G45910 Poptr1|586770,Poptr1|693969  
Poptr1|568739  
Poptr1|595133,Poptr1|566001  
Poptr1|552578  
AT5G14450 Poptr1|691588  
AT3G05180  
AT1G54790 Poptr1|670274,Poptr1|662785,Poptr1|742222  
AT4G01130Poptr1|731252  
Poptr1|711379  
AT4G16450 Poptr1|701230,Poptr1|560196  
AT5G57655  
Poptr1|702191  
AT1G75730 Poptr1|346698,Poptr1|694843  
AT3G05980,AT5G19340 Poptr1|564814,Poptr1|566275  
AT1G49670 Poptr1|686729  
AT1G65330,AT1G65300,AT5G27960,AT5G26650,AT5G26580,AT1G33070,AT1G31630,AT1G31640  
AT5G06500  
AT5G26630  
AT2G28700,AT3G05860  
AT1G22590 Poptr1|561164  
AT5G27810,AT5G48670 Poptr1|97553  
AT5G16840  
Poptr1|658693  
AT5G32450 Poptr1|571178,Poptr1|573950  
Poptr1|548130  
AT1G67950  
AT3G01210 Poptr1|736292,Poptr1|736290  
AT5G46870,AT4G17720 Poptr1|646278,Poptr1|702941  
AT1G14340  
AT3G29130 Poptr1|675402  
AT1G45976 Poptr1|677871,Poptr1|583226,Poptr1|551842  
AT1G32740  
AT1G10650,AT1G60610 Poptr1|687062  
Poptr1|355899  
AT4G35070 Poptr1|556646  
AT5G47050,AT4G17680 Poptr1|580140,Poptr1|356556  
Poptr1|346665,Poptr1|559861  
Poptr1|674320  
AT4G18460  
Poptr1|585302  
AT2G25710,AT1G37150 Poptr1|694544,Poptr1|342443  
AT1G47317,AT2G15045,AT2G21465,AT1G33000,AT1G47320,AT1G26950,AT3G14500,AT5G36905,AT5G45595,AT5  
G06805,AT1G43995,AT4G12275,AT2G22350,AT2G27870,AT5G42905,AT5G26642,AT1G17390,AT2G36402,AT4G08  
860,AT5G33360,AT5G46875 Poptr1|589985,Poptr1|595376,Poptr1|596665,Poptr1|356492,Poptr1|350182  
AT5G61090,AT5G61120 Poptr1|559594  
AT3G43940  
AT5G61080 Poptr1|594462  
AT2G04530 Poptr1|573034  
AT1G74700 Poptr1|744122  
AT1G52510 Poptr1|60155  
Poptr1|711590  
AT1G78030  
AT2G22660,AT4G37900 Poptr1|733022  
AT3G19510,AT3G19530 Poptr1|697367,Poptr1|65247  
AT2G20180 Poptr1|553260  
AT4G28810,AT4G28800,AT4G28790  
Poptr1|108531  
AT5G16715  
Poptr1|545426  
AT1G27160,AT1G14610 Poptr1|558652,Poptr1|686136  
Poptr1|585307  
Poptr1|545425,Poptr1|553010  
AT5G07330 Poptr1|575489,Poptr1|699331,Poptr1|570385  
AT1G63060 Poptr1|554667  
AT2G31010 Poptr1|348480,Poptr1|57259  
AT2G42640,AT3G58640  
AT1G53000 Poptr1|579474,Poptr1|55964  
AT4G00510  
AT1G01710,AT4G00520 Poptr1|700220



AT1G09812 Poptr1|98675,Poptr1|703773  
Poptr1|591740,Poptr1|551977,Poptr1|739845,Poptr1|580148  
AT4G17080,AT2G35170  
AT1G77660,AT1G21920 Poptr1|692711,Poptr1|559216  
AT1G02170 Poptr1|59390  
AT4G25110  
AT5G64240 Poptr1|577403  
Poptr1|577401,Poptr1|577402  
Poptr1|570400,Poptr1|108447,Poptr1|588189,Poptr1|570398,Poptr1|588185,Poptr1|588186,Poptr1|10091  
9,Poptr1|570405,Poptr1|592977,Poptr1|356187  
AT5G59050 Poptr1|697622  
Poptr1|563961,Poptr1|698545,Poptr1|667934,Poptr1|653049  
AT2G39870,AT3G55690,AT3G54000  
Poptr1|698710  
AT5G58560 Poptr1|64679,Poptr1|557647  
AT5G04490  
AT3G55940,AT3G08510 Poptr1|567270,Poptr1|696783  
AT5G58690 Poptr1|48965  
Poptr1|64254  
AT5G58670,AT4G38530 Poptr1|48964  
AT2G40116Poptr1|345043  
AT3G47220,AT3G47290,AT5G58700  
AT1G50350  
AT5G56340,AT4G26400 Poptr1|62667,Poptr1|693137  
AT5G60820,AT5G08139 Poptr1|569927  
AT5G15820,AT3G02340,AT3G30460  
AT4G18110,AT5G54990  
AT2G03000 Poptr1|545881  
AT2G39720  
Poptr1|574311,Poptr1|592207,Poptr1|574312  
AT3G10815  
AT1G74620 Poptr1|587376  
AT1G49850  
Poptr1|576624  
AT3G58720 Poptr1|572816  
AT1G18760,AT1G18770,AT3G13228,AT1G18780,AT2G29840,AT1G21960,AT5G53910  
Poptr1|352585,Poptr1|551449  
AT5G01980 Poptr1|734406  
AT5G59550,AT3G46620  
Poptr1|548460  
AT1G14200  
AT5G64920  
AT1G68180 Poptr1|575663,Poptr1|570596  
AT2G15580 Poptr1|738085,Poptr1|344465  
Poptr1|549771  
Poptr1|583887,Poptr1|584642,Poptr1|594456,Poptr1|554825  
AT3G13430,AT1G55530  
AT1G60360 Poptr1|342430  
Poptr1|562457,Poptr1|75511,Poptr1|108921,Poptr1|71513,Poptr1|562461  
Poptr1|572341  
Poptr1|571232,Poptr1|573894  
AT3G56580,AT2G40830 Poptr1|682288,Poptr1|701293  
AT5G20910 Poptr1|716783  
AT2G44330,AT3G60080 Poptr1|583301  
Poptr1|353573,Poptr1|560785  
Poptr1|743469,Poptr1|355160  
AT1G26800 Poptr1|567037,Poptr1|564210  
Poptr1|64352  
AT3G19950 Poptr1|558672,Poptr1|654963  
Poptr1|556132,Poptr1|582424,Poptr1|593253,Poptr1|591444,Poptr1|104448,Poptr1|569653,Poptr1|10840  
0,Poptr1|591442,Poptr1|596298,Poptr1|109269,Poptr1|355400  
AT5G24490 Poptr1|586947,Poptr1|582827,Poptr1|569684,Poptr1|732721  
AT3G10572 Poptr1|578882,Poptr1|695466  
AT1G04940 Poptr1|704667  
AT3G03280,AT5G17350 Poptr1|553043,Poptr1|546485,Poptr1|354225,Poptr1|566530  
AT4G02090 Poptr1|348336  
AT5G52190 Poptr1|57802  
AT3G56830 Poptr1|347841  
AT1G65420 Poptr1|564111  
Poptr1|574105  
AT1G58080  
AT1G09795 Poptr1|596721,Poptr1|665627  
Poptr1|570080  
AT1G27510 Poptr1|562367,Poptr1|666458,Poptr1|661990  
AT4G33630 Poptr1|577301  
Poptr1|733296  
Poptr1|351626,Poptr1|736609  
AT2G38670 Poptr1|739745,Poptr1|701714  
AT5G11960Poptr1|352654,Poptr1|61300  
AT5G25150 Poptr1|595325,Poptr1|689063,Poptr1|353013  
Poptr1|60583,Poptr1|725820  
AT1G09020 Poptr1|674428,Poptr1|581849,Poptr1|729579,Poptr1|101185,Poptr1|101196

AT5G58005 Poptr1|653557,Poptr1|738024  
AT4G31810 Poptr1|561991,Poptr1|578284  
AT3G60510 Poptr1|703021  
AT2G30660,AT5G65940,AT2G30650 Poptr1|732648  
Poptr1|356477  
Poptr1|105975,Poptr1|586337,Poptr1|586335,Poptr1|583178  
AT1G06550 Poptr1|692802  
AT3G24360,AT4G13360 Poptr1|685671  
AT2G47020  
Poptr1|552605  
AT3G62910 Poptr1|572734  
AT3G53440 Poptr1|98495,Poptr1|98489,Poptr1|577781  
AT1G78810 Poptr1|699066  
AT3G58020  
AT2G18465 Poptr1|691722,Poptr1|99902  
AT4G00580,AT2G01800,AT1G30060,AT4G00920,AT1G56100 Poptr1|75640  
Poptr1|654310,Poptr1|690489  
AT5G09550 Poptr1|577313,Poptr1|75530  
AT2G44100,AT3G59920  
AT1G42990 Poptr1|694930  
AT4G28230 Poptr1|663538,Poptr1|574597  
AT4G26450 Poptr1|98091  
AT3G13360  
AT5G56210 Poptr1|550670,Poptr1|582529  
AT1G02065 Poptr1|347807,Poptr1|740112  
AT2G33810  
Poptr1|584539  
AT1G27370,AT1G27360  
Poptr1|740114  
AT3G57920,AT2G42200 Poptr1|576281  
Poptr1|574181  
AT5G43270 Poptr1|640026,Poptr1|647067  
Poptr1|656548,Poptr1|581397  
AT1G69170 Poptr1|656549  
Poptr1|743830,Poptr1|568872  
Poptr1|594656  
AT5G50570,AT5G50670 Poptr1|733658,Poptr1|699365,Poptr1|712454,Poptr1|640056  
Poptr1|572214,Poptr1|572213  
AT3G09970,AT3G09960 Poptr1|644422,Poptr1|341526,Poptr1|552137  
Poptr1|593083,Poptr1|552711,Poptr1|582841,Poptr1|348551  
Poptr1|732388  
AT5G14780  
AT5G16660,AT3G02900 Poptr1|571412,Poptr1|702464  
AT1G42960 Poptr1|694914  
Poptr1|719161  
AT1G30970 Poptr1|343398,Poptr1|676356  
AT5G58370  
Poptr1|571889,Poptr1|574498  
AT1G51390,AT3G20970 Poptr1|655785,Poptr1|725449  
Poptr1|701415  
AT5G03850,AT3G10090,AT5G64140 Poptr1|655714,Poptr1|660106  
AT3G09850 Poptr1|352282,Poptr1|578806  
AT1G69670,AT1G26830 Poptr1|566300,Poptr1|720255  
AT1G59800,AT1G59790  
Poptr1|581789  
Poptr1|584399  
AT1G02980  
Poptr1|581856,Poptr1|581855,Poptr1|97724,Poptr1|570819  
AT5G46210 Poptr1|694099,Poptr1|586119  
AT4G02570 Poptr1|690137,Poptr1|711781,Poptr1|680491,Poptr1|588083,Poptr1|725818,Poptr1|704369  
AT3G46910,AT4G12100  
AT2G03510 Poptr1|656518,Poptr1|724048  
AT1G68730 Poptr1|658969  
Poptr1|642887  
AT5G27280 Poptr1|652153  
Poptr1|550071,Poptr1|697415  
AT2G22690,AT4G37880 Poptr1|570590,Poptr1|575673  
AT5G09630  
AT1G48430,AT3G17770 Poptr1|96997,Poptr1|687677  
Poptr1|109129,Poptr1|591515  
AT5G07570  
Poptr1|550165,Poptr1|99061,Poptr1|582444,Poptr1|102232,Poptr1|579914,Poptr1|593606,Poptr1|585440,  
Poptr1|581439,Poptr1|569892,Poptr1|107632,Poptr1|586385,Poptr1|585559,Poptr1|584910,Poptr1|590789,Poptr1|58  
4665,Poptr1|592749,Poptr1|581421,Poptr1|587459,Poptr1|573316,Poptr1|579923,Poptr1|579865,Poptr1|102061,Poptr  
r1|582291,Poptr1|569911,Poptr1|579374,Poptr1|565322,Poptr1|589157,Poptr1|552669,Poptr1|108748,Poptr1|592585,  
Poptr1|107633,Poptr1|585345,Poptr1|108668,Poptr1|594368,Poptr1|568516,Poptr1|583964,Poptr1|592093,Poptr1|110  
5374,Poptr1|556212,Poptr1|573791,Poptr1|679291,Poptr1|597471  
AT4G31040 Poptr1|344220,Poptr1|99220  
AT1G48405,AT3G17680 Poptr1|580612,Poptr1|569415  
AT5G14230 Poptr1|565895,Poptr1|641773  
Poptr1|65776,Poptr1|661250  
Poptr1|64924

AT2G30942 Poptr1|639579  
AT3G16400,AT3G16410,AT3G16390,AT2G33070,AT1G54040,AT5G48180  
Poptr1|573111  
AT3G07720  
AT5G43680 Poptr1|551102  
AT3G06310,AT5G18800 Poptr1|721121,Poptr1|686991  
AT5G26730 Poptr1|575902,Poptr1|560198  
AT5G16920 Poptr1|573857  
AT1G79380 Poptr1|564153  
Poptr1|666549,Poptr1|662072,Poptr1|721022  
Poptr1|564152,Poptr1|724254  
AT1G67800  
AT5G63970 Poptr1|718620,Poptr1|715797  
Poptr1|560073  
AT5G14420,AT3G01650 Poptr1|706825  
AT1G47750 Poptr1|347724,Poptr1|591826  
AT4G16210 Poptr1|566844,Poptr1|341903  
AT4G16710 Poptr1|570876,Poptr1|59983  
AT3G26480  
AT2G18900 Poptr1|591313,Poptr1|580503,Poptr1|578583  
AT3G52910 Poptr1|640500  
AT2G38780 Poptr1|708533  
AT5G14680,AT3G01520 Poptr1|577503  
AT5G52900 Poptr1|580578,Poptr1|569443  
AT1G71410,AT1G22870 Poptr1|592384  
AT2G03620 Poptr1|698367,Poptr1|564302  
AT3G58970 Poptr1|351736  
AT3G19640 Poptr1|591503,Poptr1|697395,Poptr1|642113,Poptr1|591486  
AT4G28580  
Poptr1|562546,Poptr1|562545  
AT5G09690  
AT5G64560 Poptr1|687079,Poptr1|354547  
AT1G16010,AT1G80900 Poptr1|554895,Poptr1|587197  
AT5G09710,AT5G09720  
Poptr1|584520  
AT5G20720 Poptr1|739209,Poptr1|736747  
AT1G16225,AT1G16230,AT1G79590,AT1G16240  
Poptr1|571006  
Poptr1|688674,Poptr1|716952,Poptr1|560328,Poptr1|701294  
AT5G07400 Poptr1|570394,Poptr1|575497  
AT5G08230,AT5G23150 Poptr1|695970,Poptr1|558693  
AT2G48160,AT3G63070 Poptr1|545503,Poptr1|572808  
AT1G48440,AT3G17780 Poptr1|661346,Poptr1|670735  
AT3G03160,AT5G17190 Poptr1|720712,Poptr1|726821  
Poptr1|57551  
AT5G50350 Poptr1|575308,Poptr1|570216  
Poptr1|547569,Poptr1|555171  
AT1G55545 Poptr1|639590  
AT1G55540 Poptr1|62665  
AT3G22990 Poptr1|657228  
AT2G38450 Poptr1|577098,Poptr1|747761  
Poptr1|564094  
AT5G05360  
AT1G02910 Poptr1|710226  
AT3G07610 Poptr1|71792,Poptr1|558603  
AT1G09060 Poptr1|581863,Poptr1|570810  
AT1G11950,AT1G62310 Poptr1|568077,Poptr1|99335  
Poptr1|355298,Poptr1|574745  
AT4G00990  
AT4G21430 Poptr1|544985  
AT1G73960 Poptr1|688433  
AT4G19170 Poptr1|738927,Poptr1|558466  
Poptr1|579588,Poptr1|556916,Poptr1|579589,Poptr1|594189,Poptr1|556918,Poptr1|594858,Poptr1|58623  
1,Poptr1|594859  
Poptr1|660513  
AT4G18350,AT1G30100  
AT3G24220 Poptr1|554823  
Poptr1|580841  
Poptr1|673323  
AT1G78390  
AT3G63520  
AT3G14440 Poptr1|55939,Poptr1|745256  
Poptr1|705370,Poptr1|706412,Poptr1|747975,Poptr1|585395,Poptr1|691461  
AT3G11960Poptr1|561208  
AT4G25370 Poptr1|356349  
Poptr1|548568,Poptr1|581181  
AT4G12060  
AT4G01310 Poptr1|572301,Poptr1|552122  
AT5G04800,AT2G05220,AT2G04390,AT3G10610 Poptr1|563545,Poptr1|592978  
AT5G65290 Poptr1|562557,Poptr1|558496  
Poptr1|580476  
AT5G57370 Poptr1|578585

AT2G34780 Poptr1|65920  
AT1G05490 Poptr1|97900  
AT1G21780 Poptr1|347243,Poptr1|72466  
AT1G55760 Poptr1|708147  
AT5G02280 Poptr1|47182  
Poptr1|737839  
AT3G62290,AT2G47170,AT1G70490,AT1G23490,AT1G10630  
AT5G14670 Poptr1|644880,Poptr1|664306,Poptr1|581645  
AT3G22950 Poptr1|699300,Poptr1|575805  
AT5G52210 Poptr1|687859,Poptr1|575790  
AT1G02430,AT1G02440  
Poptr1|716296  
AT3G49860  
AT2G18390 Poptr1|655316  
AT5G67560,AT3G49870 Poptr1|707441,Poptr1|697390  
Poptr1|662566,Poptr1|570684,Poptr1|696657,Poptr1|723997  
AT2G15310 Poptr1|65220  
AT3G03120,AT5G17060 Poptr1|738606,Poptr1|571694  
AT2G24765 Poptr1|654280,Poptr1|702093  
AT5G37680 Poptr1|580843,Poptr1|714184,Poptr1|645212  
AT1G78610 Poptr1|55912  
AT2G17010,AT2G17000 Poptr1|546736  
AT3G14810,AT1G53470  
Poptr1|571351,Poptr1|571352,Poptr1|579749,Poptr1|730162  
Poptr1|346628,Poptr1|571350,Poptr1|581301,Poptr1|559897  
AT1G49260 Poptr1|663229  
Poptr1|589266  
AT5G19520,AT5G12080 Poptr1|352620  
Poptr1|356553  
AT4G17140  
AT1G48090 Poptr1|564344,Poptr1|566891  
AT4G17120  
AT4G17110Poptr1|356552  
AT4G17130  
AT1G32520 Poptr1|580094,Poptr1|676529  
AT5G02560  
Poptr1|669008,Poptr1|669007,Poptr1|561845,Poptr1|695005  
AT4G27230  
AT1G52740  
AT5G54640,AT3G20670  
AT5G59870  
AT1G54690,AT1G08880 Poptr1|595535,Poptr1|729701,Poptr1|699787,Poptr1|595536  
Poptr1|717022  
AT4G13570  
AT5G27670 Poptr1|704386,Poptr1|662712  
Poptr1|555460  
AT3G54560 Poptr1|651830,Poptr1|692862  
AT1G51060 Poptr1|661070,Poptr1|663327  
AT2G38810  
AT3G54860 Poptr1|567651,Poptr1|686542,Poptr1|567652  
AT2G16960,AT2G16950 Poptr1|713392,Poptr1|54365  
AT2G30695 Poptr1|704561  
Poptr1|582765  
AT5G18960,AT3G06250 Poptr1|565675,Poptr1|354904  
Poptr1|575779,Poptr1|570489  
Poptr1|654460,Poptr1|553130,Poptr1|562233,Poptr1|562235  
Poptr1|683244  
Poptr1|576383  
AT4G38180 Poptr1|595036  
AT3G59470  
Poptr1|62985  
AT4G15090 Poptr1|351268  
Poptr1|569206  
AT2G43280 Poptr1|562231  
AT5G28530 Poptr1|573101  
Poptr1|592702  
Poptr1|562227,Poptr1|594526  
Poptr1|578229  
AT3G22170 Poptr1|734562,Poptr1|560233  
Poptr1|562232  
AT4G19990 Poptr1|350060  
AT1G10240 Poptr1|596766  
AT2G27110Poptr1|649000,Poptr1|741723  
AT2G32250 Poptr1|701252  
AT1G76320 Poptr1|647221  
Poptr1|577720  
Poptr1|552498,Poptr1|354058  
AT3G07500 Poptr1|732614  
AT1G52520 Poptr1|592701  
Poptr1|575990

Poptr1|103566  
Poptr1|352945  
Poptr1|564110  
Poptr1|577721  
AT1G80010  
Poptr1|560012,Poptr1|59902  
Poptr1|567843,Poptr1|563499  
AT4G38170  
Poptr1|105751  
AT4G12850  
Poptr1|57381  
AT1G02330  
Poptr1|700345  
Poptr1|666637,Poptr1|666639,Poptr1|346007  
AT5G63420  
Poptr1|733581  
AT3G59640,AT2G43630  
Poptr1|579191  
AT2G33360,AT1G04490  
Poptr1|565818  
Poptr1|106638,Poptr1|580285,Poptr1|687760,Poptr1|700816  
Poptr1|596406  
AT1G49040  
Poptr1|664363  
AT3G47550,AT5G62460  
Poptr1|659309,Poptr1|686408  
Poptr1|582756  
AT2G02960,AT1G14260  
Poptr1|644833,Poptr1|644832  
AT1G02610,AT4G02075  
Poptr1|553038,Poptr1|590688,Poptr1|693895  
AT2G01275  
AT5G38070  
AT1G22275  
Poptr1|347379  
AT4G01320  
Poptr1|47638,Poptr1|644503  
Poptr1|571182  
Poptr1|595370  
AT3G62710  
Poptr1|702444,Poptr1|687990  
AT5G04885  
Poptr1|344839  
AT3G47040,AT3G47000,AT3G47010,AT3G47050  
Poptr1|574210  
AT5G20950,AT5G20940  
Poptr1|686608  
AT1G23180  
Poptr1|354270  
AT2G25840  
Poptr1|554641  
AT5G50110  
Poptr1|575108,Poptr1|570046  
Poptr1|693886,Poptr1|348828  
AT5G37730  
AT1G70780,AT1G23150  
Poptr1|698183,Poptr1|686299  
AT4G02790  
Poptr1|694695  
AT1G22630  
Poptr1|592283  
AT1G52855  
AT2G20835  
Poptr1|579522,Poptr1|582107,Poptr1|568957,Poptr1|580362,Poptr1|677456,Poptr1|580361,Poptr1|66352  
2  
AT5G21030,AT5G21150  
AT5G43810  
Poptr1|726473,Poptr1|564892  
AT2G32940  
Poptr1|732333  
Poptr1|578277  
AT1G69440  
Poptr1|584120  
AT1G48410  
Poptr1|670714,Poptr1|661404  
Poptr1|57888,Poptr1|560288,Poptr1|683794,Poptr1|344827  
AT2G27880  
Poptr1|697765,Poptr1|709670  
AT2G27040  
Poptr1|106093,Poptr1|576054  
AT1G31280,AT1G31290  
Poptr1|575568,Poptr1|586740  
Poptr1|560287  
Poptr1|589537  
Poptr1|590811  
AT3G01940  
Poptr1|48581,Poptr1|554768,Poptr1|641826,Poptr1|707046,Poptr1|597131  
AT3G01950,AT5G14110  
AT5G40960  
Poptr1|549717,Poptr1|689955  
AT5G50660,AT5G50560  
AT5G63500,AT3G48660  
Poptr1|666686,Poptr1|662168  
AT5G40970,AT3G27030  
Poptr1|641828,Poptr1|597133  
AT5G40980  
Poptr1|64970,Poptr1|597134  
Poptr1|554767  
Poptr1|575374  
Poptr1|597135  
AT4G29960  
Poptr1|344199,Poptr1|58820  
AT3G46450  
Poptr1|697661,Poptr1|691412  
AT5G41950  
Poptr1|646818  
AT3G08960  
AT3G08955  
Poptr1|58206  
Poptr1|661911

Poptr1|661912,Poptr1|733175  
AT5G25580 Poptr1|352835,Poptr1|578128  
AT1G18950 Poptr1|355807  
AT5G13920,AT1G54930 Poptr1|557289  
AT3G52770 Poptr1|567947,Poptr1|560740  
AT5G66130 Poptr1|346350  
AT2G47340,AT1G02550 Poptr1|348355,Poptr1|348357  
AT3G36659  
AT5G42510,AT5G42500,AT1G22900,AT1G65870  
AT2G21100Poptr1|54399  
AT2G21110Poptr1|353609  
Poptr1|547850,Poptr1|594249,Poptr1|547851,Poptr1|547849  
Poptr1|555240,Poptr1|105439,Poptr1|593540  
Poptr1|576402,Poptr1|576404,Poptr1|561225,Poptr1|735096  
AT4G38700  
Poptr1|557112  
Poptr1|640735  
AT1G58170 Poptr1|547643,Poptr1|351040  
AT1G55210,AT3G13660,AT5G49040,AT3G13662,AT3G13650  
Poptr1|578894,Poptr1|576403  
AT3G15520 Poptr1|568950,Poptr1|579509  
AT2G32150 Poptr1|564828,Poptr1|658536  
AT5G59480 Poptr1|46330  
Poptr1|574114,Poptr1|723234  
AT3G62040 Poptr1|644719  
AT5G02230 Poptr1|685738  
AT5G59490  
AT1G50940 Poptr1|569098  
Poptr1|104513  
AT5G14800 Poptr1|576194,Poptr1|695578  
Poptr1|108260  
AT3G25680  
AT5G52410  
AT5G23890 Poptr1|699314,Poptr1|734202  
AT3G51160,AT5G66280 Poptr1|563266,Poptr1|593866  
Poptr1|676810  
AT4G31430 Poptr1|672594,Poptr1|583157,Poptr1|583155  
Poptr1|563986,Poptr1|567306  
AT3G55820  
AT3G61800 Poptr1|57092,Poptr1|552280  
AT3G26110,AT1G24520 Poptr1|356033,Poptr1|666640,Poptr1|354725,Poptr1|64864  
AT5G13070 Poptr1|62977  
Poptr1|108765,Poptr1|562494,Poptr1|558441  
AT2G13440  
AT2G40730 Poptr1|587382,Poptr1|587695,Poptr1|573361,Poptr1|668081,Poptr1|574897,Poptr1|554976,Poptr1|70003  
7,Poptr1|58972  
Poptr1|60279,Poptr1|687675  
AT1G76820 Poptr1|569066  
Poptr1|593564  
AT2G27700,AT1G21160,AT1G76720,AT1G76825,AT1G76810  
Poptr1|99014  
AT2G01080 Poptr1|709739,Poptr1|553462  
AT5G09225 Poptr1|576168  
AT5G65840 Poptr1|655530  
Poptr1|571999  
AT1G80190 Poptr1|593186,Poptr1|589281  
AT4G39130,AT2G21490 Poptr1|713051,Poptr1|557213  
AT1G68660 Poptr1|658931,Poptr1|696577  
AT4G36480 Poptr1|672053,Poptr1|97021,Poptr1|345647  
AT4G04885 Poptr1|555362  
Poptr1|562193  
AT4G24210 Poptr1|740519,Poptr1|644072  
Poptr1|561655  
AT2G46210,AT3G61580 Poptr1|644538,Poptr1|572325  
AT4G25940,AT5G57200 Poptr1|579037,Poptr1|560668  
AT1G33340 Poptr1|581062  
AT5G35200 Poptr1|669737,Poptr1|560566  
AT4G40080 Poptr1|559046  
AT1G14910,AT2G01600 Poptr1|640808,Poptr1|675317,Poptr1|669736,Poptr1|658750,Poptr1|720939  
Poptr1|566412,Poptr1|564693  
AT3G16870,AT4G16141 Poptr1|565456  
Poptr1|734216,Poptr1|667065  
AT4G09980 Poptr1|667064  
Poptr1|734215  
Poptr1|728888  
Poptr1|568937,Poptr1|670105  
AT1G13380 Poptr1|658890,Poptr1|682390  
AT3G15480,AT1G52910  
AT4G27435 Poptr1|568938,Poptr1|683323  
AT1G68220 Poptr1|354199,Poptr1|658847  
AT1G61065 Poptr1|569785,Poptr1|555543

AT3G26950 Poptr1|691663  
AT5G24450,AT3G49410 Poptr1|104962,Poptr1|58291,Poptr1|562090  
AT4G22000 Poptr1|732868,Poptr1|661529  
AT5G38520 Poptr1|581060  
AT1G03110Poptr1|559573  
Poptr1|346961  
AT1G56180 Poptr1|567071  
AT5G56360 Poptr1|62669,Poptr1|555175,Poptr1|571230  
AT2G42390 Poptr1|672328  
AT3G55800 Poptr1|563976,Poptr1|567316  
AT4G14100,AT3G23760 Poptr1|682972,Poptr1|63223  
Poptr1|554673  
Poptr1|578636  
AT5G66930 Poptr1|655186  
Poptr1|573182  
AT3G25470  
AT4G38810 Poptr1|556579  
Poptr1|696755  
AT3G56210  
AT2G32640 Poptr1|688328  
AT3G04870 Poptr1|689835  
AT3G10970 Poptr1|702405  
AT3G21810 Poptr1|562306  
Poptr1|562307  
AT2G27830 Poptr1|649081,Poptr1|741654  
Poptr1|554252  
AT2G41680 Poptr1|560485  
Poptr1|105183  
Poptr1|642580  
AT4G35460,AT2G17420 Poptr1|569200  
Poptr1|564016  
AT3G11220 Poptr1|724479  
AT3G58050,AT2G41960 Poptr1|344445,Poptr1|576395  
AT2G42210 Poptr1|672941  
Poptr1|573027,Poptr1|732347,Poptr1|573024  
AT2G15230  
AT5G14180 Poptr1|597152,Poptr1|706967  
AT1G72990 Poptr1|592772  
AT2G03070 Poptr1|55651,Poptr1|679475  
Poptr1|681596  
AT5G05110Poptr1|667246,Poptr1|690699  
Poptr1|593389  
Poptr1|558164,Poptr1|548704  
AT5G12140 Poptr1|679045,Poptr1|62858,Poptr1|711771  
AT2G40880  
AT3G12490  
AT4G16500  
AT5G47550 Poptr1|576488  
AT5G16280 Poptr1|576490,Poptr1|576489  
AT5G18170,AT3G03910 Poptr1|571209,Poptr1|702434  
AT5G07440 Poptr1|676450,Poptr1|575509  
Poptr1|552707  
Poptr1|592241,Poptr1|592243  
Poptr1|348612,Poptr1|572967  
AT4G04610,AT4G21990 Poptr1|588813  
AT1G62180  
AT3G21820 Poptr1|741339  
Poptr1|561129,Poptr1|705129  
AT5G20140  
AT2G07680 Poptr1|350729  
Poptr1|548376,Poptr1|584542  
Poptr1|748016,Poptr1|545007,Poptr1|585002,Poptr1|727721,Poptr1|546378  
AT1G30410,AT1G30420  
Poptr1|593485  
Poptr1|565079  
AT3G59140 Poptr1|355192,Poptr1|569460,Poptr1|100158,Poptr1|746631,Poptr1|748486  
AT2G34660,AT1G30400 Poptr1|698974  
AT3G21250 Poptr1|592737  
AT1G71330  
Poptr1|343672,Poptr1|63462,Poptr1|646708  
AT3G60970,AT3G60160  
Poptr1|577033  
AT3G13080  
Poptr1|587808,Poptr1|555042,Poptr1|555041,Poptr1|350854,Poptr1|550171,Poptr1|65461,Poptr1|350866,  
Poptr1|590236  
AT1G04120 Poptr1|573380,Poptr1|553288  
Poptr1|592739  
AT2G47800,AT3G62700 Poptr1|692309

Poptr1|99223  
AT3G13090,AT3G13100  
Poptr1|588488  
Poptr1|571563  
Poptr1|582855,Poptr1|571564  
Poptr1|571588,Poptr1|587492,Poptr1|106296  
AT2G21045 Poptr1|572712  
Poptr1|346625  
AT5G66170  
AT5G66040 Poptr1|703345  
AT2G17850 Poptr1|741224  
AT4G35770  
Poptr1|567617  
AT4G14145  
AT1G08170  
Poptr1|548736  
AT3G53650,AT2G37470 Poptr1|698696,Poptr1|725127  
AT3G09480,AT5G02570  
AT3G46030,AT3G45980,AT5G59910,AT1G07790  
Poptr1|597304,Poptr1|555931,Poptr1|723333,Poptr1|553020,Poptr1|725141  
AT5G22880,AT2G28720  
AT3G55580 Poptr1|659629  
Poptr1|560808,Poptr1|724631,Poptr1|656140,Poptr1|563938  
AT3G53830 Poptr1|576833  
AT1G25260 Poptr1|661306,Poptr1|550559  
Poptr1|692860  
AT5G20030  
AT4G32440,AT2G25590 Poptr1|640645  
Poptr1|578178,Poptr1|352893  
AT3G06890 Poptr1|705122,Poptr1|565590  
AT4G34920,AT4G34930  
AT4G38690 Poptr1|649253,Poptr1|713244  
AT4G10110Poptr1|581009  
AT2G46500  
AT5G24240 Poptr1|732892,Poptr1|699582  
AT3G43950  
Poptr1|548326  
AT1G64460,AT1G64470 Poptr1|731346  
Poptr1|352454  
Poptr1|585568,Poptr1|586271,Poptr1|587245,Poptr1|109241,Poptr1|62807,Poptr1|594053,Poptr1|350963  
AT1G80780,AT2G32070 Poptr1|702058,Poptr1|694966,Poptr1|48542,Poptr1|554871  
AT1G27890,AT1G27820,AT1G61470,AT3G44240,AT1G06450 Poptr1|584306,Poptr1|545257,Poptr1|578101  
AT3G44260,AT5G22250 Poptr1|686593,Poptr1|679906  
Poptr1|653549  
AT1G15920  
AT5G10960  
Poptr1|551099,Poptr1|72830  
AT1G47720 Poptr1|551884,Poptr1|591886  
AT5G56540,AT4G26320,AT3G13520,AT1G55330 Poptr1|341682,Poptr1|547592,Poptr1|573930  
AT3G16175 Poptr1|349587,Poptr1|553739  
AT4G22900,AT4G11950 Poptr1|554286,Poptr1|48774  
AT5G52580 Poptr1|351582,Poptr1|578917  
AT5G27710 Poptr1|581877  
AT1G74140,AT1G74130,AT1G18600 Poptr1|352665  
AT5G20180 Poptr1|560603,Poptr1|736574  
AT1G73060 Poptr1|587205  
Poptr1|554888  
Poptr1|593547  
Poptr1|580175,Poptr1|573753  
AT5G56300  
Poptr1|58862,Poptr1|573754,Poptr1|573758  
AT5G66430,AT5G04370,AT5G04380,AT3G11480,AT3G21950,AT5G38020,AT2G14060  
AT1G19640 Poptr1|52171  
Poptr1|593443  
AT4G36470 Poptr1|53396  
Poptr1|563193,Poptr1|573110  
AT5G55250 Poptr1|65424  
AT1G51745 Poptr1|349380,Poptr1|64124  
AT4G35190 Poptr1|715601,Poptr1|346605,Poptr1|713418,Poptr1|557017  
Poptr1|589087  
AT2G28305 Poptr1|595075,Poptr1|686929  
AT2G35990  
Poptr1|585681  
Poptr1|574854  
AT3G53450,AT2G37210 Poptr1|667811,Poptr1|59161  
AT5G26140,AT5G11950 Poptr1|561635  
Poptr1|691460,Poptr1|549309  
Poptr1|569994,Poptr1|594577,Poptr1|109318,Poptr1|107362,Poptr1|56848,Poptr1|65505,Poptr1|588095,  
Poptr1|571152,Poptr1|100784,Poptr1|577526  
Poptr1|711981,Poptr1|708284  
Poptr1|587012,Poptr1|99799,Poptr1|586199,Poptr1|585287,Poptr1|597475,Poptr1|573834,Poptr1|583737,  
Poptr1|580245,Poptr1|593422,Poptr1|584777,Poptr1|585279,Poptr1|565384,Poptr1|596601,Poptr1|595235,Poptr1|97



652,Poptr1|585684,Poptr1|597167,Poptr1|591466,Poptr1|99644,Poptr1|587476,Poptr1|61130,Poptr1|48871,Poptr1|58  
8414,Poptr1|596505,Poptr1|585427,Poptr1|585428,Poptr1|571715,Poptr1|568403,Poptr1|590337,Poptr1|345859,Poptr  
r1|72237,Poptr1|584265,Poptr1|545942,Poptr1|583726,Poptr1|583727,Poptr1|597201,Poptr1|576718,Poptr1|64104,Pop  
ptr1|586282,Poptr1|571722,Poptr1|72086,Poptr1|584386,Poptr1|587804,Poptr1|569949,Poptr1|576720,Poptr1|5851  
82,Poptr1|98053,Poptr1|597143,Poptr1|97714,Poptr1|576756,Poptr1|573442,Poptr1|545683,Poptr1|585328,Poptr1|59  
0357,Poptr1|546610,Poptr1|593504,Poptr1|590670,Poptr1|553364,Poptr1|584375,Poptr1|663404,Poptr1|577816,Poptr  
r1|553363,Poptr1|596502,Poptr1|98777,Poptr1|577446,Poptr1|55828,Poptr1|585473,Poptr1|585995,Poptr1|583946,Pop  
ptr1|553568,Poptr1|588784,Poptr1|562835,Poptr1|588042,Poptr1|574850,Poptr1|577478,Poptr1|574033,Poptr1|579  
202,Poptr1|579735,Poptr1|596404,Poptr1|107661,Poptr1|585415,Poptr1|562911,Poptr1|99936,Poptr1|593164,Poptr1|  
101425,Poptr1|577493,Poptr1|585545,Poptr1|588017,Poptr1|58224,Poptr1|588104,Poptr1|585994,Poptr1|596174,Pop  
ptr1|593470,Poptr1|593012,Poptr1|584400,Poptr1|584988,Poptr1|576760,Poptr1|583375,Poptr1|545770,Poptr1|5905  
62,Poptr1|582491,Poptr1|580835,Poptr1|565437,Poptr1|345641,Poptr1|586928,Poptr1|587349,Poptr1|565935,Poptr1|  
584214,Poptr1|584824,Poptr1|101256,Poptr1|583911,Poptr1|583061,Poptr1|569910,Poptr1|593314,Poptr1|584368,Pop  
ptr1|597679,Poptr1|588852,Poptr1|581419,Poptr1|582933,Poptr1|568404,Poptr1|573484,Poptr1|597418,Poptr1|585  
282,Poptr1|590468,Poptr1|597439,Poptr1|577806,Poptr1|72267,Poptr1|596999,Poptr1|580452,Poptr1|586633,Poptr1|  
585741,Poptr1|585739,Poptr1|671565,Poptr1|552420,Poptr1|568754,Poptr1|352405,Poptr1|595236,Poptr1|584361,Pop  
ptr1|550439,Poptr1|580471,Poptr1|597147,Poptr1|102862,Poptr1|583025,Poptr1|355698,Poptr1|585843,Poptr1|586  
683,Poptr1|109276,Poptr1|352145,Poptr1|107931,Poptr1|109117,Poptr1|105679,Poptr1|586181,Poptr1|351807,Poptr1|  
584817,Poptr1|594393,Poptr1|593608,Poptr1|592960,Poptr1|585539,Poptr1|548968,Poptr1|587963,Poptr1|573481,  
Poptr1|593658,Poptr1|585554,Poptr1|592442,Poptr1|565629,Poptr1|587477,Poptr1|51913,Poptr1|588552,Poptr1|585  
175,Poptr1|558374,Poptr1|577072,Poptr1|588307,Poptr1|583398,Poptr1|592599,Poptr1|588619,Poptr1|596513,Poptr  
1|576731,Poptr1|553523,Poptr1|585471,Poptr1|581761,Poptr1|585223,Poptr1|584203,Poptr1|584814,Poptr1|573830,  
Poptr1|587995,Poptr1|593273,Poptr1|72309,Poptr1|571153,Poptr1|573512,Poptr1|72238,Poptr1|591519,Poptr1|1007  
94,Poptr1|584993,Poptr1|548645,Poptr1|584856,Poptr1|582146,Poptr1|592480,Poptr1|593576,Poptr1|582381,Poptr1|  
580556,Poptr1|584068,Poptr1|108180,Poptr1|587051,Poptr1|587543,Poptr1|595729,Poptr1|565624,Poptr1|595699,Pop  
ptr1|580233,Poptr1|596032,Poptr1|588226,Poptr1|597676,Poptr1|587988,Poptr1|571439,Poptr1|581808,Poptr1|596  
687,Poptr1|565354,Poptr1|592544,Poptr1|578042,Poptr1|579514,Poptr1|585469,Poptr1|574847,Poptr1|586274,Poptr  
1|355688,Poptr1|587789,Poptr1|593703,Poptr1|49258,Poptr1|99105,Poptr1|103518,Poptr1|596818,Poptr1|584204,Pop  
ptr1|589233,Poptr1|586437,Poptr1|590874,Poptr1|585214,Poptr1|584396,Poptr1|588046,Poptr1|587989,Poptr1|5970  
02,Poptr1|553954,Poptr1|571714,Poptr1|582923,Poptr1|595837,Poptr1|588676,Poptr1|590200,Poptr1|597590,Poptr1|  
587488

Poptr1|579329  
Poptr1|348503,Poptr1|571440,Poptr1|556362,Poptr1|584373,Poptr1|559050  
AT5G06300 Poptr1|717079,Poptr1|576524  
AT5G03270  
Poptr1|585689,Poptr1|587711,Poptr1|580232,Poptr1|588547  
Poptr1|642986,Poptr1|652045  
Poptr1|65737,Poptr1|590828,Poptr1|584992  
AT3G13677 Poptr1|582099  
Poptr1|553055,Poptr1|348870,Poptr1|555894  
Poptr1|63568,Poptr1|350196  
AT5G38140 Poptr1|555893  
AT1G54830,AT1G08970 Poptr1|570867,Poptr1|595583,Poptr1|565336,Poptr1|571576  
AT5G27910,AT5G50490,AT5G50470,AT5G50480  
AT5G63470,AT3G48590 Poptr1|341997,Poptr1|575368  
AT1G56170 Poptr1|558718,Poptr1|75959  
Poptr1|570824,Poptr1|581845  
Poptr1|671601  
Poptr1|671644  
Poptr1|697861,Poptr1|588650  
AT3G21440 Poptr1|101192,Poptr1|671599  
Poptr1|671600  
AT5G27610,AT3G05380  
AT3G21430  
Poptr1|565739  
AT5G07380 Poptr1|575495  
AT3G25760,AT3G25770,AT3G25780,AT1G13280 Poptr1|580775,Poptr1|556141  
Poptr1|686337  
AT3G05590,AT5G27850 Poptr1|572675,Poptr1|644772,Poptr1|662668,Poptr1|581899  
AT2G47570  
Poptr1|746053,Poptr1|591049  
AT1G11720Poptr1|544794  
Poptr1|678879,Poptr1|717979  
AT4G18240 Poptr1|64727  
AT5G65685 Poptr1|673480  
AT5G24680 Poptr1|355454  
AT1G43330,AT2G13960 Poptr1|572206,Poptr1|593671  
AT5G19240,AT5G19230,AT5G19250,AT3G06035 Poptr1|720254,Poptr1|720267  
AT1G54860 Poptr1|570853,Poptr1|595589,Poptr1|595590,Poptr1|595591,Poptr1|570852  
AT5G41360,AT5G41370  
Poptr1|674287,Poptr1|63516  
AT4G26160 Poptr1|704578,Poptr1|561086  
AT1G08570 Poptr1|730028,Poptr1|573891  
AT2G33270  
AT5G61440  
AT4G29670  
Poptr1|662264,Poptr1|108099  
AT5G61820 Poptr1|103775,Poptr1|575484,Poptr1|662261,Poptr1|575486,Poptr1|701077,Poptr1|582643  
AT4G29000,AT2G20110 Poptr1|98951  
AT3G16160 Poptr1|64027  
AT5G25790  
Poptr1|584051,Poptr1|737629

AT4G28830  
     Poptr1|665597  
 AT1G24706           Poptr1|346457,Poptr1|574075  
 AT1G31730           Poptr1|596858  
 AT1G23940,AT1G23900  
 AT1G60070           Poptr1|701566,Poptr1|351838  
 AT3G24160           Poptr1|693220,Poptr1|690908  
 AT1G19750,AT1G27840           Poptr1|700128  
     Poptr1|64535  
 AT3G52090           Poptr1|722673  
 AT5G61970           Poptr1|570343,Poptr1|701061  
 AT2G36740           Poptr1|704435  
     Poptr1|582040  
 AT4G21150Poptr1|692906,Poptr1|694769  
 AT3G48610           Poptr1|705377,Poptr1|570272,Poptr1|575372  
 AT1G07230           Poptr1|697588,Poptr1|641078  
 AT2G26870           Poptr1|706532  
 AT3G03540,AT3G03530,AT3G03520  
 AT4G05360,AT3G27800,AT3G59550           Poptr1|63820  
     Poptr1|558264  
 AT1G08020  
 AT1G08030  
 AT3G16350           Poptr1|693674,Poptr1|705811  
 AT5G47390           Poptr1|740017,Poptr1|343420  
     Poptr1|106943  
 AT5G62750           Poptr1|663057  
     Poptr1|97405  
     Poptr1|100329  
 AT1G25490  
 AT3G25800,AT1G13320           Poptr1|696575,Poptr1|687194  
 AT1G15800,AT1G80610           Poptr1|673450,Poptr1|668375,Poptr1|549836  
 AT5G25210,AT4G32030           Poptr1|654203  
 AT4G27070,AT5G54810           Poptr1|56813,Poptr1|56018  
     Poptr1|108994  
 AT5G28237           Poptr1|698854  
     Poptr1|109244  
 AT2G33180           Poptr1|640000  
 AT3G61200           Poptr1|692413,Poptr1|700200  
 AT5G35840  
 AT4G16250,AT2G18790           Poptr1|686362,Poptr1|723933  
 AT4G18130  
 AT1G09570           Poptr1|729311  
 AT4G08240           Poptr1|692710  
 AT4G23730  
 AT4G25900  
     Poptr1|548373  
 AT3G61610           Poptr1|711145  
     Poptr1|737712,Poptr1|580517,Poptr1|693145,Poptr1|48476  
 AT5G14500,AT3G01590           Poptr1|64811  
     Poptr1|590777  
 AT5G57330  
 AT5G66530           Poptr1|719543  
 AT3G02180,AT5G15600           Poptr1|680830  
 AT4G23496           Poptr1|683674,Poptr1|693415  
 AT2G03680  
 AT1G69230           Poptr1|577765,Poptr1|698365  
     Poptr1|583708,Poptr1|584347  
 AT1G09300           Poptr1|570698  
 AT4G23620           Poptr1|586953,Poptr1|691105  
 AT5G66860           Poptr1|696043,Poptr1|651041  
 AT1G70760           Poptr1|658753  
 AT4G24510           Poptr1|558994  
 AT4G13840,AT3G23840           Poptr1|549793  
 AT3G07980,AT3G13530           Poptr1|655009,Poptr1|650914,Poptr1|650913  
     Poptr1|716578,Poptr1|551508  
     Poptr1|71820  
     Poptr1|556607  
     Poptr1|591780  
 AT4G08480           Poptr1|551370  
     Poptr1|105756  
     Poptr1|650916  
 AT2G18530           Poptr1|102768,Poptr1|597298  
 AT2G18770,AT5G05670           Poptr1|650565,Poptr1|550873  
 AT5G54860           Poptr1|569116,Poptr1|569114  
     Poptr1|593413  
 AT2G32040           Poptr1|55120  
     Poptr1|677646,Poptr1|743250,Poptr1|589937,Poptr1|644264  
 AT3G60245,AT3G10950  
 AT3G13225           Poptr1|642344  
     Poptr1|665350  
     Poptr1|665348,Poptr1|665351  
 AT3G04260           Poptr1|665349

AT4G32820 Poptr1|580032,Poptr1|577909,Poptr1|352739  
AT2G26050,AT1G80220,AT5G38370,AT1G15430 Poptr1|63704,Poptr1|349492  
AT1G77770  
AT3G25910 Poptr1|561120,Poptr1|704603  
AT4G31410 Poptr1|583159,Poptr1|578390  
AT1G68140 Poptr1|63889,Poptr1|553460  
AT4G08460 Poptr1|72411,Poptr1|710834  
AT3G24740 Poptr1|644990  
AT1G56500  
Poptr1|581685  
AT2G28725,AT1G07795 Poptr1|560748  
AT4G16510 Poptr1|343552  
Poptr1|581248  
AT2G20920 Poptr1|648817,Poptr1|557054  
AT1G64600 Poptr1|48666  
Poptr1|566800,Poptr1|720425,Poptr1|55325  
AT3G16980,AT4G16265  
Poptr1|576936,Poptr1|560886  
AT5G01220  
AT4G19400 Poptr1|693533  
Poptr1|574682  
AT1G01160,AT4G00850 Poptr1|644637,Poptr1|572448  
AT5G27410,AT3G05190 Poptr1|595547  
AT4G24680 Poptr1|575197,Poptr1|570158  
AT5G24360  
AT3G11870,AT2G17520 Poptr1|349881  
Poptr1|342105,Poptr1|559974  
AT1G08120,AT5G26110 Poptr1|643275  
Poptr1|343458,Poptr1|356871  
AT1G52320  
AT5G25590 Poptr1|654044,Poptr1|668960  
Poptr1|63980,Poptr1|343346  
AT1G02110,AT3G60320 Poptr1|347755  
AT4G28910 Poptr1|675263,Poptr1|680818  
AT5G14760 Poptr1|549513  
AT4G19020 Poptr1|712122  
AT1G80740  
Poptr1|555247,Poptr1|62737  
AT1G69770 Poptr1|555246  
Poptr1|683888  
Poptr1|722610  
AT2G30110 Poptr1|557638  
Poptr1|557633  
AT5G06460  
Poptr1|722605  
AT5G17790 Poptr1|571288,Poptr1|579355  
AT1G58350,AT1G09980 Poptr1|689628,Poptr1|574220  
AT5G53310 Poptr1|586578,Poptr1|729037  
Poptr1|640574  
AT4G11910,AT4G22920 Poptr1|548540,Poptr1|554288  
AT1G44000 Poptr1|643550,Poptr1|714613  
AT1G15010,AT2G01300 Poptr1|658802,Poptr1|564591,Poptr1|555917,Poptr1|545405,Poptr1|555914  
AT3G52040 Poptr1|683849,Poptr1|697527,Poptr1|593605  
AT5G40940 Poptr1|354228,Poptr1|564594,Poptr1|71678,Poptr1|580767  
AT1G12790 Poptr1|65596  
AT1G78910 Poptr1|681053  
Poptr1|681052  
AT3G19440  
AT1G54890  
AT5G60530  
AT4G27400,AT5G54370 Poptr1|582104  
Poptr1|568962  
Poptr1|356196  
Poptr1|650456  
AT5G60520 Poptr1|650457,Poptr1|558254  
Poptr1|568961  
AT4G28470,AT2G20580,AT4G08140 Poptr1|594639,Poptr1|695743  
AT4G02725  
Poptr1|714983  
Poptr1|579837,Poptr1|566573  
AT1G02340,AT3G62090,AT1G68240  
AT4G00050 Poptr1|671488,Poptr1|644303,Poptr1|570649  
Poptr1|710215  
AT1G71270,AT1G71300 Poptr1|560298  
AT5G14050 Poptr1|643211,Poptr1|52124  
AT4G34940 Poptr1|546711,Poptr1|649250  
AT5G66200,AT4G36030 Poptr1|679130  
Poptr1|582641  
Poptr1|345953,Poptr1|593610,Poptr1|575225  
AT3G26600 Poptr1|687051  
Poptr1|563930,Poptr1|567387  
AT2G44920

AT1G26940 Poptr1|657869  
 AT1G54650 Poptr1|571076  
 AT3G09080 Poptr1|560876  
 AT1G05430 Poptr1|657177,Poptr1|658512  
 AT1G12230 Poptr1|581230  
 AT2G04700 Poptr1|641561  
 AT2G46230,AT1G26530 Poptr1|644544  
 AT5G24060  
 AT3G59300 Poptr1|552806  
 AT1G53450,AT3G14830 Poptr1|55914,Poptr1|585503,Poptr1|593317  
 AT3G55860 Poptr1|109019  
 AT3G60660  
 AT2G26720,AT2G31050  
 AT5G07475 Poptr1|104214,Poptr1|597406,Poptr1|548229  
 Poptr1|560138  
 AT2G32300 Poptr1|562324  
 Poptr1|669766,Poptr1|64107  
 AT5G57920  
 AT3G20570 Poptr1|569096,Poptr1|571501  
 Poptr1|570923,Poptr1|579624,Poptr1|350135,Poptr1|573952  
 AT3G60270,AT3G60280,AT2G44790 Poptr1|703049  
 AT4G12880,AT5G15350,AT3G01070 Poptr1|556316,Poptr1|577695  
 Poptr1|553152  
 AT1G22480,AT1G72230 Poptr1|341494,Poptr1|692634  
 AT5G25090  
 AT2G02850 Poptr1|342383,Poptr1|709727  
 AT1G48940,AT3G18590  
 AT1G79800 Poptr1|349604,Poptr1|64054  
 AT4G28365,AT4G32490 Poptr1|594662  
 Poptr1|705108,Poptr1|554892  
 AT2G23990,AT4G30590  
 AT4G01380,AT1G45063,AT3G53330,AT3G28958  
 AT4G31840,AT2G25060 Poptr1|669166,Poptr1|561995,Poptr1|695215  
 AT5G20230 Poptr1|578934,Poptr1|578935,Poptr1|652799  
 AT4G27520  
 AT5G26330 Poptr1|696431,Poptr1|726591  
 AT1G64640 Poptr1|709061  
 AT2G27035 Poptr1|577694,Poptr1|549016  
 Poptr1|582282,Poptr1|552190,Poptr1|552136,Poptr1|552143,Poptr1|549335,Poptr1|552138,Poptr1|56194  
 3,Poptr1|561944,Poptr1|551171,Poptr1|576304,Poptr1|546199,Poptr1|553787  
 AT3G27200 Poptr1|641792  
 AT1G17800 Poptr1|562481  
 AT5G17560 Poptr1|571371  
 AT1G72280 Poptr1|569143,Poptr1|65687  
 AT2G38960  
 AT1G20050 Poptr1|646939,Poptr1|548131  
 AT2G47540 Poptr1|552474  
 AT4G02270  
 Poptr1|107058,Poptr1|692286  
 AT1G54970,AT3G62680,AT2G47530 Poptr1|348288,Poptr1|572666  
 AT5G17230 Poptr1|545530,Poptr1|689661  
 Poptr1|585253  
 Poptr1|711679,Poptr1|639664,Poptr1|555222  
 Poptr1|347024,Poptr1|342320,Poptr1|714897  
 Poptr1|547627  
 AT3G09340,AT3G09330,AT5G02170,AT5G02180 Poptr1|576813  
 AT5G15240 Poptr1|577647,Poptr1|577648  
 Poptr1|567647  
 AT3G28960  
 Poptr1|659914  
 AT2G41190Poptr1|351403  
 AT3G54830  
 Poptr1|564204,Poptr1|567043  
 Poptr1|343046  
 AT2G39130 Poptr1|659912,Poptr1|720698  
 AT5G16740  
 Poptr1|350474,Poptr1|691007  
 AT5G17370  
 AT4G15650 Poptr1|565362,Poptr1|107432  
 AT5G56960 Poptr1|561062  
 Poptr1|645616  
 AT1G28400,AT2G33850,AT1G03820 Poptr1|671016,Poptr1|693951  
 AT1G02570,AT2G47360 Poptr1|572607,Poptr1|552535  
 AT5G26960 Poptr1|549362  
 AT2G43250 Poptr1|103219,Poptr1|594479  
 AT3G54720 Poptr1|352186  
 AT4G07670,AT5G19740 Poptr1|352104  
 AT1G48630,AT3G18130,AT1G18080 Poptr1|569764,Poptr1|574969  
 AT5G35400 Poptr1|704865  
 AT5G59980 Poptr1|558126  
 AT5G08320 Poptr1|682131  
 AT4G36250 Poptr1|563236

Poptr1|585706  
 Poptr1|706286  
 AT4G34240 Poptr1|97859,Poptr1|51694  
 AT1G44170 Poptr1|342410,Poptr1|685296  
 AT3G22850  
 Poptr1|580878,Poptr1|546469  
 AT4G27450 Poptr1|579495,Poptr1|728421  
 AT5G19140 Poptr1|657667  
 AT5G43830 Poptr1|720953,Poptr1|47258  
 AT3G15450  
 AT3G26360 Poptr1|658248  
 AT4G38640 Poptr1|648768,Poptr1|649242  
 AT2G19560 Poptr1|685579  
 AT1G58070 Poptr1|573734,Poptr1|596724  
 Poptr1|570078,Poptr1|666455  
 AT5G13700 Poptr1|64524  
 Poptr1|102961,Poptr1|61606  
 AT5G54080 Poptr1|691860  
 AT2G38000 Poptr1|576908,Poptr1|695392  
 AT3G47430 Poptr1|581266,Poptr1|590183,Poptr1|554178  
 Poptr1|567061  
 AT3G19840 Poptr1|659322,Poptr1|564188  
 AT4G38090 Poptr1|563305  
 AT3G59090 Poptr1|551235,Poptr1|559490  
 AT4G33980,AT5G42900 Poptr1|677853,Poptr1|644117  
 Poptr1|694872  
 AT5G66100  
 AT4G35890 Poptr1|593806,Poptr1|696002  
 AT1G66130 Poptr1|552873  
 AT1G34200,AT4G09670 Poptr1|559453,Poptr1|714860  
 AT1G29800 Poptr1|555626  
 AT3G43230 Poptr1|58436,Poptr1|739247  
 AT4G18270 Poptr1|568443  
 AT2G35110Poptr1|575640,Poptr1|570617  
 Poptr1|575639,Poptr1|587889,Poptr1|575636,Poptr1|662489,Poptr1|596211  
 Poptr1|587896,Poptr1|662488,Poptr1|596002  
 Poptr1|575637,Poptr1|669872,Poptr1|100737,Poptr1|596214  
 AT3G42050 Poptr1|702399,Poptr1|730237  
 AT2G47790 Poptr1|684286,Poptr1|688271  
 Poptr1|348354,Poptr1|572604,Poptr1|678389,Poptr1|671766  
 AT1G56460 Poptr1|673850  
 AT3G06660  
 AT2G47350  
 Poptr1|671767,Poptr1|570710  
 Poptr1|564395  
 Poptr1|641383,Poptr1|722752  
 AT2G03870  
 AT5G55120,AT4G26850 Poptr1|727930,Poptr1|691788  
 Poptr1|552990  
 AT1G77840,AT1G36730  
 Poptr1|590689,Poptr1|553039,Poptr1|693894,Poptr1|584639,Poptr1|583885  
 AT3G52940 Poptr1|702804  
 AT1G21326 Poptr1|342372,Poptr1|72565  
 AT3G18360,AT1G68450 Poptr1|561186  
 AT1G27070 Poptr1|355048,Poptr1|354854  
 AT5G54460 Poptr1|691086  
 AT5G24460 Poptr1|574631  
 AT1G44770 Poptr1|559223,Poptr1|684504  
 AT2G26280 Poptr1|561567,Poptr1|578018  
 AT2G43980 Poptr1|695716,Poptr1|577283  
 AT4G00755 Poptr1|644393,Poptr1|663890,Poptr1|572177  
 AT5G28740 Poptr1|713684  
 AT4G20070 Poptr1|702844  
 AT4G22550 Poptr1|554202  
 AT3G51140Poptr1|563251  
 AT5G23040 Poptr1|674365,Poptr1|355580  
 Poptr1|354877,Poptr1|725726  
 AT5G11380Poptr1|737131,Poptr1|561848  
 Poptr1|554004  
 Poptr1|574104,Poptr1|597251,Poptr1|581625  
 AT3G21500,AT4G15560  
 Poptr1|99588  
 AT5G14260 Poptr1|585260  
 AT1G48380 Poptr1|585856,Poptr1|592943,Poptr1|555564,Poptr1|585858  
 AT5G04840 Poptr1|698782  
 Poptr1|582271  
 AT1G03190 Poptr1|346993  
 AT2G32290  
 AT5G18670 Poptr1|696249  
 Poptr1|63388,Poptr1|350382  
 AT4G00490 Poptr1|572252  
 AT4G15210 Poptr1|679498

AT4G17090 Poptr1|589941,Poptr1|743239  
AT3G23920 Poptr1|345478,Poptr1|54993  
AT5G55700  
AT2G45880 Poptr1|663971,Poptr1|644451  
AT5G45300 Poptr1|350020  
AT2G39100 Poptr1|581750  
AT2G02500 Poptr1|742598  
AT1G73220 Poptr1|580606,Poptr1|355152  
AT1G16390,AT1G79360 Poptr1|560415,Poptr1|57933  
Poptr1|567109  
AT1G16370,AT1G79410  
AT3G20660 Poptr1|699130  
AT4G28430,AT2G20590 Poptr1|594644,Poptr1|718222  
AT5G59710  
AT1G07705 Poptr1|58328,Poptr1|691552  
AT4G24580 Poptr1|551643,Poptr1|559020  
AT5G19390,AT5G12150 Poptr1|557695,Poptr1|691495  
AT4G14342,AT3G23325 Poptr1|565775,Poptr1|696362  
Poptr1|64894  
AT5G63280 Poptr1|575298  
AT5G40710  
AT2G43350 Poptr1|594490,Poptr1|685932  
AT2G25080 Poptr1|669182  
AT2G48150,AT3G63080 Poptr1|731984  
AT4G11600  
Poptr1|350213,Poptr1|709364,Poptr1|587397,Poptr1|679037  
AT2G31570  
AT1G63460 Poptr1|548472  
AT4G31870  
Poptr1|659368,Poptr1|564154  
AT1G79390  
AT5G64980  
AT4G02880,AT1G03290 Poptr1|572812  
AT3G61680 Poptr1|572381,Poptr1|342798,Poptr1|593007  
AT3G62590  
AT1G02660 Poptr1|684264  
AT1G65700 Poptr1|691506  
AT4G02485 Poptr1|731881  
AT4G02980  
Poptr1|572796,Poptr1|690498  
Poptr1|344243  
AT4G26870,AT4G31180  
AT2G20890 Poptr1|574584,Poptr1|663549  
Poptr1|586227  
AT4G34350 Poptr1|556431,Poptr1|557296  
Poptr1|674402  
AT2G31530 Poptr1|551187  
AT1G18490 Poptr1|742425,Poptr1|729116  
AT5G15120 Poptr1|545766  
AT5G39890  
Poptr1|730039  
AT3G58670,AT2G42670  
Poptr1|568704,Poptr1|555667  
AT1G57600 Poptr1|687892  
AT5G11800,AT2G19600  
Poptr1|588984,Poptr1|352693  
AT5G51710 Poptr1|728642,Poptr1|575711  
AT1G49880 Poptr1|49318  
AT2G19570 Poptr1|681740,Poptr1|672427,Poptr1|653308  
AT4G29650,AT4G29610,AT4G29640,AT4G29630,AT4G29600,AT4G29620,AT4G29580,AT4G29570  
Poptr1|588457,Poptr1|588456,Poptr1|579253,Poptr1|588159,Poptr1|588160,Poptr1|596354,Poptr1|10019  
1,Poptr1|101087,Poptr1|596355,Poptr1|586726,Poptr1|101091,Poptr1|596356,Poptr1|588161,Poptr1|588459,Poptr1|7  
01095  
AT5G45160 Poptr1|701096  
AT3G13870,AT1G72960 Poptr1|740944,Poptr1|742864  
Poptr1|100197,Poptr1|575528,Poptr1|101088,Poptr1|100200,Poptr1|582001,Poptr1|101098,Poptr1|57925  
2,Poptr1|101086  
Poptr1|584838,Poptr1|588458,Poptr1|101097,Poptr1|101090,Poptr1|100190,Poptr1|100192,Poptr1|10108  
5,Poptr1|586725  
AT1G67210,AT5G38600 Poptr1|580764  
AT1G75510 Poptr1|685416,Poptr1|643039  
AT3G52270 Poptr1|563766,Poptr1|55587  
AT4G24620 Poptr1|709870  
AT3G21700,AT5G54840 Poptr1|569105  
Poptr1|553108,Poptr1|678855,Poptr1|593299  
AT3G47930 Poptr1|351444  
AT3G20510,AT1G50740 Poptr1|688055,Poptr1|699153  
AT1G33470  
Poptr1|107116  
Poptr1|671061,Poptr1|663427  
AT3G54770  
Poptr1|355358,Poptr1|574666

Poptr1|643776  
AT1G20880,AT1G76460 Poptr1|550726,Poptr1|652263  
AT5G53680,AT5G53720,AT1G22335,AT3G06970  
AT1G22910 Poptr1|573565  
AT1G78260,AT1G22330  
Poptr1|655968,Poptr1|659812  
AT2G46780 Poptr1|572461,Poptr1|552349  
AT4G21880,AT4G04790 Poptr1|569075,Poptr1|571481,Poptr1|569073,Poptr1|569074  
AT4G33670 Poptr1|550060,Poptr1|557582  
AT4G22560,AT4G12450,AT1G62520 Poptr1|646453,Poptr1|671227  
AT3G24320 Poptr1|54982  
AT4G09680 Poptr1|551882  
AT3G62190 Poptr1|552604  
AT5G38860  
Poptr1|674138  
Poptr1|574881  
AT1G69010 Poptr1|698288,Poptr1|564449  
AT5G08130 Poptr1|574882,Poptr1|355709  
Poptr1|745734,Poptr1|109061,Poptr1|673557  
AT2G19180 Poptr1|579038  
AT1G78890,AT1G16840 Poptr1|697036  
AT2G44735,AT3G29150,AT3G18720 Poptr1|570347  
AT1G57790,AT3G56470 Poptr1|576591,Poptr1|561499  
AT4G10700,AT4G10660,AT4G12370,AT4G10695  
AT1G49360  
AT5G10040,AT5G65207 Poptr1|562657,Poptr1|590327,Poptr1|650780  
Poptr1|346389  
AT1G19710,AT1G75420 Poptr1|643064,Poptr1|643063  
AT5G17170 Poptr1|738570  
AT2G47115Poptr1|572554,Poptr1|552585  
AT3G27770 Poptr1|64781  
AT1G10660  
AT5G62960 Poptr1|728442,Poptr1|57601  
AT1G70505  
AT1G04960 Poptr1|552719,Poptr1|645036,Poptr1|573037  
AT1G44674,AT1G27000  
AT2G02730 Poptr1|657115,Poptr1|566293  
AT1G11480Poptr1|695801,Poptr1|594421  
AT2G29630 Poptr1|723102,Poptr1|549090  
AT5G24314 Poptr1|666108  
AT2G39730 Poptr1|656126,Poptr1|698568,Poptr1|576820  
Poptr1|555139,Poptr1|48478,Poptr1|62816  
AT1G73110  
AT1G19870 Poptr1|550914  
AT4G34190 Poptr1|691741,Poptr1|697348  
AT2G32980 Poptr1|573008,Poptr1|645054  
Poptr1|584863  
AT5G41850 Poptr1|709188  
Poptr1|559598,Poptr1|747648  
AT5G43860 Poptr1|564875  
AT1G19670  
Poptr1|72799  
AT3G51270 Poptr1|690488  
Poptr1|673933,Poptr1|673314  
Poptr1|585842,Poptr1|675810  
AT3G17810 Poptr1|661339,Poptr1|580617  
AT1G36180,AT1G36160 Poptr1|559146,Poptr1|684485  
AT3G13000 Poptr1|695154  
AT5G66600 Poptr1|558811,Poptr1|563076  
AT3G18900  
Poptr1|550704  
AT3G12540,AT2G39690  
AT5G60720 Poptr1|697741  
AT4G33130,AT3G47675  
AT5G47380 Poptr1|589869  
AT1G21060,AT1G76620,AT1G43020  
AT2G23700  
Poptr1|546651,Poptr1|557301  
AT1G16750  
AT3G09860 Poptr1|688790  
AT3G21190,AT1G51630 Poptr1|725306,Poptr1|563468  
Poptr1|575478  
AT2G06040,AT5G21900  
AT2G06030 Poptr1|589282  
Poptr1|717783  
AT2G44580 Poptr1|64786  
AT3G10620 Poptr1|55687,Poptr1|686558  
AT5G06340 Poptr1|593674  
AT1G30110Poptr1|686305,Poptr1|726879  
Poptr1|576513,Poptr1|653368  
AT5G42850 Poptr1|548701  
AT3G53470 Poptr1|675949,Poptr1|576635

AT1G29330 Poptr1|55877  
Poptr1|641922,Poptr1|577431  
AT3G25040  
AT1G14480,AT1G14500,AT5G54620,AT5G54610,AT4G10720,AT5G15500 Poptr1|588172  
AT2G23370 Poptr1|696021  
AT4G34090 Poptr1|642005,Poptr1|557406  
Poptr1|585896,Poptr1|591176  
AT1G18340 Poptr1|705650,Poptr1|559224  
AT1G65020 Poptr1|597577,Poptr1|663292,Poptr1|47594,Poptr1|597578  
Poptr1|732967  
AT2G30100 Poptr1|641513  
AT1G15220  
Poptr1|553738  
Poptr1|714534  
AT3G03560 Poptr1|571361,Poptr1|571360,Poptr1|571362  
AT5G23510,AT5G23490,AT5G08440  
AT1G01060 Poptr1|552368,Poptr1|731468  
AT5G37260,AT5G17300  
AT2G46830 Poptr1|552367  
AT3G10113,AT1G18330 Poptr1|96978  
AT5G11900Poptr1|577951,Poptr1|561654  
AT3G53670,AT2G37480  
Poptr1|560728  
AT3G45210,AT5G60680,AT2G28400 Poptr1|595060,Poptr1|723531  
AT4G26950  
AT3G15040  
AT4G21930  
AT1G11700,AT1G61930 Poptr1|694075,Poptr1|698823  
AT1G29640,AT2G34340,AT5G45630,AT4G18980  
AT5G03230 Poptr1|702735,Poptr1|576691  
AT4G21970,AT4G04630 Poptr1|568025,Poptr1|647553  
AT3G24315 Poptr1|725955  
Poptr1|554684,Poptr1|708845,Poptr1|575465  
AT1G29880,AT3G44740,AT1G29870  
AT2G35200,AT1G32690 Poptr1|580066,Poptr1|590017  
Poptr1|554344,Poptr1|548482  
Poptr1|680131  
AT2G29550  
Poptr1|560355,Poptr1|734723  
Poptr1|569745,Poptr1|733090  
AT5G62690,AT5G62700 Poptr1|549110,Poptr1|557988  
Poptr1|570525,Poptr1|579315  
Poptr1|738482,Poptr1|571195  
AT5G12250  
Poptr1|550601  
Poptr1|722705,Poptr1|697476  
Poptr1|547597  
AT1G75780,AT1G20010 Poptr1|685438,Poptr1|711612  
AT5G19780,AT5G19770  
Poptr1|647111  
Poptr1|748560  
AT1G04820,AT1G50010,AT4G14960  
AT5G23860  
Poptr1|576903,Poptr1|344282  
Poptr1|711676  
Poptr1|646722  
Poptr1|64606  
AT1G64740  
Poptr1|709348,Poptr1|554362  
AT4G20890,AT5G44340 Poptr1|582598  
AT3G61650,AT5G05620 Poptr1|572355,Poptr1|342791  
Poptr1|707459,Poptr1|557543,Poptr1|711611,Poptr1|577614  
AT4G22600 Poptr1|581232  
AT3G17170 Poptr1|564358  
AT1G27340 Poptr1|343795,Poptr1|708738  
AT5G27490,AT3G05280 Poptr1|570850,Poptr1|595593  
AT2G39805 Poptr1|686470,Poptr1|724612  
AT3G04480 Poptr1|571104,Poptr1|573724  
AT2G18000  
Poptr1|719737  
AT5G45600 Poptr1|557155,Poptr1|694201  
AT4G18070 Poptr1|705094,Poptr1|660568  
AT5G52240 Poptr1|570486,Poptr1|666994  
AT2G24940 Poptr1|341818,Poptr1|737400  
Poptr1|733950  
AT3G48890  
AT5G42620 Poptr1|347717,Poptr1|591836  
AT5G16780 Poptr1|646843  
Poptr1|712731  
AT3G14700  
Poptr1|640254  
AT2G15240 Poptr1|686743,Poptr1|65234



Poptr1|556389  
AT5G15950,AT3G02470  
AT5G18930 Poptr1|565288,Poptr1|565682  
AT3G25570 Poptr1|566183,Poptr1|97052,Poptr1|566714  
AT5G20165 Poptr1|565050,Poptr1|658147  
AT2G31410 Poptr1|572880,Poptr1|553105  
AT2G20410 Poptr1|573708,Poptr1|571088  
Poptr1|109222  
Poptr1|553470,Poptr1|691255  
AT3G26410  
AT5G01920 Poptr1|561000  
AT1G68830 Poptr1|656771,Poptr1|720664,Poptr1|566670  
AT3G15840 Poptr1|705702  
AT5G20900,AT3G43440 Poptr1|695150  
AT3G19360 Poptr1|349486  
AT2G35430,AT1G32360 Poptr1|554027,Poptr1|356641  
Poptr1|670002,Poptr1|556055  
AT5G52520 Poptr1|741028  
Poptr1|648208  
AT3G62120 Poptr1|572525,Poptr1|552617  
AT5G10880  
AT2G28780 Poptr1|549195,Poptr1|558098  
AT3G09450 Poptr1|108289,Poptr1|344227  
AT3G51840 Poptr1|560926,Poptr1|668054  
AT3G09890 Poptr1|667869  
AT4G38980 Poptr1|556536,Poptr1|557176  
AT1G65900 Poptr1|592815  
Poptr1|584438,Poptr1|592816  
Poptr1|352934  
Poptr1|578916  
AT4G32270 Poptr1|578219  
Poptr1|674672,Poptr1|587502,Poptr1|589710,Poptr1|586719,Poptr1|562694  
AT2G44270,AT1G76170 Poptr1|71720  
AT1G79210,AT1G16470 Poptr1|570631,Poptr1|677481,Poptr1|682977,Poptr1|699235  
AT2G39580 Poptr1|656062,Poptr1|724759  
Poptr1|656063  
AT5G28080,AT3G04910 Poptr1|354469,Poptr1|698077,Poptr1|595458  
AT1G64630,AT5G41990 Poptr1|48661,Poptr1|554544,Poptr1|563718  
AT3G48260 Poptr1|345960,Poptr1|575240  
AT5G55560 Poptr1|573071  
AT3G22420  
AT3G51630 Poptr1|577158  
AT1G49160,AT3G18750 Poptr1|595389  
AT5G58350 Poptr1|571883,Poptr1|574491  
AT5G01150,AT5G01140,AT5G01130,AT3G09120,AT3G09110,AT3G09140,AT5G43240,AT5G01120,AT5G37320,AT1  
G11145 Poptr1|549107,Poptr1|691369  
Poptr1|75775  
AT3G03350  
AT5G50770 Poptr1|575394  
AT4G10020 Poptr1|574179,Poptr1|59565  
AT3G47350,AT3G47360,AT5G50590,AT5G50690  
Poptr1|585656,Poptr1|576285,Poptr1|576284,Poptr1|57688,Poptr1|688548,Poptr1|728483  
AT3G03330 Poptr1|596953  
AT5G50600,AT5G50700  
AT1G49540 Poptr1|564564,Poptr1|723689  
AT5G46295 Poptr1|568452  
AT1G06475 Poptr1|643376,Poptr1|559491  
AT5G42890 Poptr1|683223,Poptr1|551855,Poptr1|568397  
Poptr1|349746  
AT4G17380 Poptr1|589877  
AT4G37090 Poptr1|655218  
AT3G60300 Poptr1|591771,Poptr1|551959  
AT5G46390 Poptr1|568463  
AT3G50430 Poptr1|71952  
AT5G15610,AT3G02200 Poptr1|712843,Poptr1|736462  
AT2G39050 Poptr1|738410  
AT2G15290  
Poptr1|697352,Poptr1|642036  
AT2G04740 Poptr1|573063  
AT5G49525 Poptr1|659120  
AT5G26790 Poptr1|581677  
AT1G45150 Poptr1|573241  
AT1G14686,AT2G01920,AT1G25240,AT1G68110 Poptr1|354345  
AT5G61850 Poptr1|701070  
AT5G42970 Poptr1|665031  
AT1G63950  
Poptr1|741108,Poptr1|693827,Poptr1|556109,Poptr1|592919,Poptr1|703328  
Poptr1|595329  
Poptr1|703726  
AT5G52760,AT5G52750,AT5G52770,AT5G52740  
Poptr1|587078  
Poptr1|570449,Poptr1|748139

Poptr1|679206,Poptr1|696117  
Poptr1|346787,Poptr1|72943  
AT1G01490 Poptr1|710061,Poptr1|731190  
AT5G23760 Poptr1|734168  
Poptr1|63497,Poptr1|554413  
AT3G05920,AT5G26690  
Poptr1|350202  
Poptr1|351715,Poptr1|99231  
AT1G63960 Poptr1|592920  
Poptr1|104683  
AT5G32470 Poptr1|571127,Poptr1|573759  
AT5G11580Poptr1|701951  
AT1G79460 Poptr1|564165,Poptr1|564162  
AT1G19850 Poptr1|652033  
AT1G30330 Poptr1|579085  
AT1G34170 Poptr1|573525  
AT3G61830,AT2G46530  
AT1G59750 Poptr1|689910,Poptr1|704693  
Poptr1|642997  
AT1G19220  
AT5G62000 Poptr1|575450,Poptr1|699349  
AT2G33860 Poptr1|713902,Poptr1|99943  
Poptr1|642998  
Poptr1|572407,Poptr1|342812  
AT4G23980 Poptr1|63398,Poptr1|554511  
Poptr1|589437,Poptr1|735501  
Poptr1|693277,Poptr1|690970  
AT5G60450  
Poptr1|583448,Poptr1|596587  
Poptr1|572751  
Poptr1|652030,Poptr1|644829  
AT5G37020 Poptr1|545564,Poptr1|59628  
Poptr1|669880,Poptr1|559171,Poptr1|585195,Poptr1|559532  
Poptr1|575420,Poptr1|72397,Poptr1|551517,Poptr1|575416  
AT4G30080 Poptr1|344901,Poptr1|687394  
AT1G77850  
Poptr1|710138,Poptr1|559533,Poptr1|49364,Poptr1|698975  
AT5G20730 Poptr1|577819,Poptr1|589324  
Poptr1|72398  
AT1G34390,AT1G34310,AT1G35240,AT1G34410,AT1G35520,AT1G35540,AT1G43950  
Poptr1|642999  
Poptr1|685770,Poptr1|690454  
AT2G28350 Poptr1|595068,Poptr1|54811  
AT1G55130,AT3G13772 Poptr1|592757  
Poptr1|578804,Poptr1|575084,Poptr1|569398,Poptr1|669661  
Poptr1|648231,Poptr1|748196,Poptr1|689669,Poptr1|703310,Poptr1|748132  
AT2G24170 Poptr1|352343,Poptr1|578742  
AT5G37310  
AT1G08350 Poptr1|594980  
AT5G35160 Poptr1|717701  
AT1G10950 Poptr1|685082,Poptr1|584468  
AT2G01970,AT1G14670 Poptr1|588958  
AT4G12650 Poptr1|732530,Poptr1|342988  
Poptr1|585248,Poptr1|581367,Poptr1|566385,Poptr1|354349  
AT5G25100,AT5G10840 Poptr1|561994,Poptr1|578289  
Poptr1|569372  
Poptr1|563387  
AT2G21710 Poptr1|557255  
AT4G30180  
AT1G09250 Poptr1|570704,Poptr1|97631  
AT3G17100 Poptr1|566854,Poptr1|656628  
AT3G05800  
AT3G06590  
AT3G07200,AT5G48655 Poptr1|692063,Poptr1|573353  
Poptr1|653051  
AT2G37925 Poptr1|560845  
AT3G46900,AT2G26975,AT5G59030,AT5G59040  
Poptr1|641132,Poptr1|558005  
AT3G07860 Poptr1|346626  
AT5G25340 Poptr1|352935  
AT1G80060  
AT2G47310  
Poptr1|698328  
AT4G03110,AT1G03457  
Poptr1|348372  
Poptr1|348471  
AT4G16280  
AT3G13800 Poptr1|592775  
AT5G62140 Poptr1|570516  
Poptr1|687156,Poptr1|656925  
AT1G14980 Poptr1|697466,Poptr1|641433  
AT1G23100

AT1G20470,AT1G76190  
     Poptr1|577308,Poptr1|577306,Poptr1|58296,Poptr1|591374,Poptr1|577305,Poptr1|577303,Poptr1|557022,  
 Poptr1|557021,Poptr1|546297,Poptr1|556703,Poptr1|72635  
 AT1G29430,AT5G27780,AT1G29440,AT1G29510,AT1G29460,AT1G29450,AT1G29500,AT1G29490,AT1G29420  
     Poptr1|557024,Poptr1|557023  
 AT4G25660,AT4G25680                      Poptr1|678553,Poptr1|693856  
 AT5G01910                                  Poptr1|351999,Poptr1|577197  
 AT5G53070                                  Poptr1|661542,Poptr1|591217,Poptr1|586761  
     Poptr1|548926,Poptr1|685002,Poptr1|653969,Poptr1|668776  
 AT4G29350,AT2G19760,AT5G56600  
 AT2G19770,AT4G29340  
 AT4G15750,AT3G12880                      Poptr1|75980  
     Poptr1|100447,Poptr1|593537,Poptr1|356042  
 AT5G14170,AT3G01890                      Poptr1|742845,Poptr1|549692  
 AT5G23110Poptr1|558698,Poptr1|650901  
 AT2G20320                                  Poptr1|553285  
     Poptr1|582928  
 AT5G35560                                  Poptr1|689344  
 AT5G26680                                  Poptr1|570643  
 AT1G52580  
 AT1G12750,AT1G63120  
 AT4G23070  
 AT5G07250                                  Poptr1|570469,Poptr1|734144  
 AT2G29050                                  Poptr1|706133  
     Poptr1|344250  
 AT1G77860                                  Poptr1|347322  
     Poptr1|717367  
     Poptr1|684888,Poptr1|63585  
 AT3G53780  
     Poptr1|596140,Poptr1|697821  
 AT3G16650,AT4G15900  
 AT3G05230,AT5G27430                      Poptr1|695061,Poptr1|668771,Poptr1|595578  
 AT4G22160                                  Poptr1|568094,Poptr1|704901  
 AT3G01640,AT5G14470                      Poptr1|549568  
     Poptr1|587130  
 AT2G20690                                  Poptr1|670581,Poptr1|582707  
 AT5G26710                                  Poptr1|704334  
 AT2G40110Poptr1|656228,Poptr1|659530  
 AT4G27740                                  Poptr1|661559,Poptr1|574710  
     Poptr1|580938  
 AT4G27745                                  Poptr1|666094,Poptr1|661558  
 AT5G53940                                  Poptr1|728369  
     Poptr1|351227  
     Poptr1|343717,Poptr1|709071  
 AT3G55890,AT3G11230  
 AT3G08990  
 AT4G28130,AT2G20900  
     Poptr1|663551,Poptr1|744645  
 AT1G17490,AT1G72690  
 AT5G57000                                  Poptr1|648057,Poptr1|681903,Poptr1|653278  
     Poptr1|549817,Poptr1|549818  
 AT5G35610  
     Poptr1|55070,Poptr1|686186  
 AT5G15030  
 AT3G24260,AT3G28870,AT1G10250  
 AT1G70030                                  Poptr1|549489  
 AT1G24250,AT1G23810,AT1G27270,AT1G27260,AT1G24230  
 AT5G15040  
 AT1G24220  
 AT1G24210  
 AT1G27250  
 AT1G27280  
 AT1G27240  
 AT5G15020,AT3G01320  
 AT1G70060,AT1G24190,AT1G24200  
 AT1G27220  
 AT1G59890,AT1G10450  
 AT3G52830                                  Poptr1|577975  
 AT3G12360                                  Poptr1|724833,Poptr1|563828  
 AT5G54700  
 AT1G07710                                  Poptr1|75665,Poptr1|71579,Poptr1|558470  
 AT3G09550                                  Poptr1|352537  
 AT2G01680                                  Poptr1|696500,Poptr1|566441  
 AT5G60070  
 AT1G05640,AT2G31820                      Poptr1|718118  
     Poptr1|344561,Poptr1|735408  
     Poptr1|591751,Poptr1|580323,Poptr1|575512,Poptr1|577974,Poptr1|561614,Poptr1|352632,Poptr1|57957  
 3  
 AT2G24600,AT1G10340,AT1G34050,AT5G54710,AT5G50140                      Poptr1|64052  
 AT5G02620  
 AT5G54720                                  Poptr1|654709  
 AT5G58630,AT5G01370                      Poptr1|701621

AT1G14270 Poptr1|354418  
AT1G73240 Poptr1|555273,Poptr1|48462  
AT1G19740,AT1G75460 Poptr1|342203,Poptr1|559785  
AT1G31817 Poptr1|718507  
AT3G09090 Poptr1|735720,Poptr1|560873  
Poptr1|734033,Poptr1|570573  
AT3G12340  
Poptr1|696216  
AT5G05420,AT4G25340  
AT2G30395,AT1G06923 Poptr1|571885  
AT3G18760 Poptr1|578800  
Poptr1|103940  
AT5G40610 Poptr1|104686,Poptr1|577494  
AT3G19830,AT1G50260 Poptr1|353826,Poptr1|567060,Poptr1|588111  
AT4G01090,AT1G01440 Poptr1|640382  
AT3G56410  
AT3G61670,AT2G46380 Poptr1|731271  
Poptr1|646729  
Poptr1|108874  
AT5G39840 Poptr1|736302  
AT4G14790 Poptr1|566213  
AT4G18020 Poptr1|689472  
AT5G05090,AT3G10760 Poptr1|560350,Poptr1|61981  
AT2G01760  
Poptr1|572656  
AT5G62120 Poptr1|566558,Poptr1|742303  
Poptr1|588137,Poptr1|654401,Poptr1|741543  
AT4G16110,AT3G16857 Poptr1|725513  
AT1G49190,AT3G62670  
Poptr1|564674  
AT5G44190  
AT2G40970  
AT1G67710 Poptr1|658208,Poptr1|565094  
AT2G27070,AT5G07210 Poptr1|570522,Poptr1|575747  
AT3G46640,AT5G59570  
AT4G31920,AT2G25180 Poptr1|561296,Poptr1|578782,Poptr1|702054,Poptr1|344757  
AT1G68210,AT4G00760  
Poptr1|742302  
AT2G20570  
AT5G49240  
Poptr1|641157  
AT5G58080  
Poptr1|347912,Poptr1|572186  
AT2G05210,AT2G04395,AT5G06310 Poptr1|355481  
AT5G17500,AT5G16700,AT3G26140,AT1G13130  
AT3G26130 Poptr1|354739  
Poptr1|548402  
AT1G18060 Poptr1|569771  
Poptr1|344948,Poptr1|724801  
AT3G55270  
AT5G44650 Poptr1|554628,Poptr1|548166  
AT3G16550,AT3G16540,AT1G65630,AT1G65640,AT5G40560  
Poptr1|564138  
AT1G54700,AT1G51150,AT5G54745  
AT2G47940 Poptr1|572750  
AT5G40200 Poptr1|728836,Poptr1|575127  
AT5G36950  
Poptr1|576154,Poptr1|641432  
AT2G26800 Poptr1|686806  
Poptr1|579633,Poptr1|641431  
Poptr1|695598  
AT2G20840 Poptr1|571774  
AT1G61250,AT1G11180 Poptr1|675791,Poptr1|568277,Poptr1|694023  
AT1G03550  
Poptr1|568276,Poptr1|545027  
AT1G32050 Poptr1|711857,Poptr1|676623  
AT5G62090 Poptr1|575770,Poptr1|699286  
AT4G25515,AT4G25520  
Poptr1|63597,Poptr1|350172  
Poptr1|354260  
Poptr1|72531  
Poptr1|595377,Poptr1|562429  
AT1G43850 Poptr1|559327,Poptr1|551368,Poptr1|589248,Poptr1|594431  
AT5G65880 Poptr1|571991  
AT1G09190 Poptr1|581936  
Poptr1|585456,Poptr1|593672  
AT1G80830,AT1G15960 Poptr1|587216,Poptr1|100440  
AT4G18790  
Poptr1|72489,Poptr1|559270  
AT2G23150,AT5G67330 Poptr1|587054,Poptr1|587050  
Poptr1|559268  
AT1G47240 Poptr1|347612

AT5G50410 Poptr1|666666,Poptr1|570254,Poptr1|575354  
AT1G64880 Poptr1|109271,Poptr1|571390  
AT1G32540 Poptr1|670410,Poptr1|740050  
AT4G21610 Poptr1|555804  
AT4G20380 Poptr1|642472,Poptr1|687655  
AT1G50500 Poptr1|734621  
AT1G50970  
AT3G13330 Poptr1|48232,Poptr1|46411  
Poptr1|691973,Poptr1|98109  
Poptr1|650002,Poptr1|582677  
AT3G57450 Poptr1|560503,Poptr1|576357,Poptr1|569470  
AT1G63940 Poptr1|554412,Poptr1|640443  
Poptr1|595124,Poptr1|109112,Poptr1|105045  
AT3G09940,AT5G03630  
AT3G27820 Poptr1|706750  
AT3G52880 Poptr1|739728  
AT5G58330 Poptr1|686548  
AT4G21740,AT1G30515 Poptr1|568598,Poptr1|642348  
AT4G20040 Poptr1|349718,Poptr1|349719  
AT4G20050 Poptr1|588705,Poptr1|739794,Poptr1|670231,Poptr1|553848  
Poptr1|552811,Poptr1|666916  
AT4G26970  
Poptr1|692180,Poptr1|700559  
AT2G05710  
AT4G35830 Poptr1|585679,Poptr1|593790  
AT5G54950 Poptr1|670222  
Poptr1|595884  
Poptr1|664665,Poptr1|645326,Poptr1|645327,Poptr1|664664,Poptr1|645325  
AT5G26570 Poptr1|664666,Poptr1|645328  
AT4G16970 Poptr1|553933,Poptr1|580170,Poptr1|346195  
AT4G32090 Poptr1|557128,Poptr1|556589  
AT4G25550 Poptr1|687855,Poptr1|575812  
AT4G29820 Poptr1|577973,Poptr1|561032  
AT2G38140 Poptr1|576947  
Poptr1|545285  
Poptr1|692084  
AT2G32700 Poptr1|63057,Poptr1|684771  
AT4G32551 Poptr1|689027,Poptr1|695011  
Poptr1|547687,Poptr1|351072,Poptr1|547688  
AT3G57980,AT2G42150 Poptr1|583285  
AT3G60110,AT2G44430 Poptr1|545029  
AT1G61215 Poptr1|346653,Poptr1|346652,Poptr1|106210  
AT1G20200,AT1G75990 Poptr1|556658,Poptr1|721660  
AT4G10790 Poptr1|548279,Poptr1|554543  
Poptr1|575201  
AT4G29930,AT5G57150  
Poptr1|669834,Poptr1|579024,Poptr1|351663,Poptr1|351667,Poptr1|351666,Poptr1|351665,Poptr1|560660,Poptr1|702341  
AT3G57280 Poptr1|554034,Poptr1|702934  
AT1G03330 Poptr1|645626,Poptr1|704846  
Poptr1|97427  
Poptr1|590302  
AT1G74470 Poptr1|569972  
Poptr1|592522,Poptr1|594916,Poptr1|649005  
AT1G26640 Poptr1|659252  
AT3G62080 Poptr1|552626  
AT3G46580,AT5G59380,AT5G59800 Poptr1|691401,Poptr1|697649  
Poptr1|575181  
AT5G63000  
Poptr1|576180  
AT2G41290 Poptr1|107623,Poptr1|576179,Poptr1|560403  
AT5G22020  
Poptr1|560404  
AT3G57020,AT3G57010,AT2G41300  
AT3G57030 Poptr1|576181  
Poptr1|351424  
AT1G08470 Poptr1|691230  
Poptr1|354071  
AT3G59530 Poptr1|594543,Poptr1|562217  
AT1G74000,AT1G74020,AT1G74010 Poptr1|355479,Poptr1|575014  
Poptr1|567965  
AT3G16360 Poptr1|578030,Poptr1|561731,Poptr1|64076  
AT3G29350,AT5G39340,AT4G04402,AT1G03430 Poptr1|653101,Poptr1|668001  
AT3G21510 Poptr1|565276,Poptr1|585666,Poptr1|725797,Poptr1|703674,Poptr1|662804  
AT5G19710 Poptr1|102632,Poptr1|65930  
AT1G80100 Poptr1|740890,Poptr1|548936  
AT1G15290 Poptr1|59583  
Poptr1|578700,Poptr1|561367,Poptr1|664124  
Poptr1|644582  
Poptr1|653625  
Poptr1|571404

AT4G28080 Poptr1|561366,Poptr1|578701  
AT3G52140 Poptr1|64591,Poptr1|686813  
AT1G01320 Poptr1|664123  
AT1G30300 Poptr1|687513  
AT4G03610  
AT5G15400 Poptr1|556317,Poptr1|577702,Poptr1|585855  
AT3G16680  
AT3G22320 Poptr1|584052  
AT3G54490 Poptr1|350846,Poptr1|48513  
AT3G57080,AT2G41340 Poptr1|57931  
AT5G57980  
AT4G33150 Poptr1|584342,Poptr1|739280  
Poptr1|589365,Poptr1|589362,Poptr1|739276,Poptr1|590470  
AT5G54855 Poptr1|682731  
AT4G08280 Poptr1|347269,Poptr1|581167  
AT1G29580,AT1G55080 Poptr1|592771  
AT5G66360 Poptr1|561990  
AT2G47420,AT1G64560 Poptr1|597215,Poptr1|572624,Poptr1|572620  
AT1G14680,AT4G09060 Poptr1|692633  
AT5G55640 Poptr1|550204  
Poptr1|342198,Poptr1|52189  
AT2G21410,AT4G39080 Poptr1|556518,Poptr1|686688  
AT2G28520  
AT1G71430 Poptr1|575035  
AT4G39160 Poptr1|565761  
AT4G38495 Poptr1|577080  
Poptr1|577082  
AT5G06260,AT4G34070 Poptr1|685610  
AT1G73570,AT1G18260 Poptr1|575012,Poptr1|569730  
AT1G77470 Poptr1|559258,Poptr1|551429  
AT3G12050 Poptr1|352227,Poptr1|735081  
AT2G13720 Poptr1|64530,Poptr1|557797,Poptr1|575293  
AT3G23890 Poptr1|575362,Poptr1|662157  
AT4G24900 Poptr1|570261  
AT4G30120,AT2G19110,AT4G30110 Poptr1|582853,Poptr1|583831,Poptr1|589122,Poptr1|586147,Poptr1|695480  
Poptr1|349319,Poptr1|587508  
Poptr1|105737  
Poptr1|579049  
Poptr1|594096  
AT1G79190 Poptr1|562860  
AT2G31970 Poptr1|49250  
AT4G21920 Poptr1|544817  
AT3G20340 Poptr1|569138,Poptr1|642439  
AT4G32600 Poptr1|654072  
Poptr1|588960  
AT1G80400  
AT5G49150 Poptr1|75438,Poptr1|103220  
Poptr1|343636  
AT1G63660 Poptr1|596322  
AT3G53180 Poptr1|589509  
AT3G11470Poptr1|653725,Poptr1|653724,Poptr1|735377  
AT2G43720  
AT1G05730,AT2G31725,AT1G05740 Poptr1|745038  
AT4G28260 Poptr1|96830,Poptr1|56850  
AT3G02820 Poptr1|658635  
AT4G08790 Poptr1|720650,Poptr1|567524  
AT5G58410 Poptr1|665950,Poptr1|665949  
AT2G05830 Poptr1|717779  
AT1G11440Poptr1|568374,Poptr1|555442  
Poptr1|49380  
Poptr1|595033  
Poptr1|575997,Poptr1|344030  
AT3G13840 Poptr1|63663,Poptr1|349450  
AT3G50650,AT5G66770 Poptr1|593942,Poptr1|53374  
Poptr1|562334,Poptr1|594419  
AT3G54220 Poptr1|734437,Poptr1|676191  
Poptr1|346824,Poptr1|72910  
AT2G04890  
AT1G66350 Poptr1|545432,Poptr1|645273  
Poptr1|562206,Poptr1|594555  
AT1G50600  
AT4G17230 Poptr1|652427,Poptr1|575909  
Poptr1|549155,Poptr1|558056  
AT5G17490,AT3G03450 Poptr1|567409,Poptr1|720118  
Poptr1|49232  
Poptr1|558055,Poptr1|549154  
AT4G37650 Poptr1|586010

AT3G46600,AT5G59450 Poptr1|650248,Poptr1|641177,Poptr1|558054,Poptr1|549153  
AT1G55580 Poptr1|574701,Poptr1|569603,Poptr1|49523  
AT1G50420 Poptr1|106351,Poptr1|343867,Poptr1|62933  
AT1G07520  
AT5G52510 Poptr1|714252,Poptr1|592851  
AT2G29060,AT1G07530 Poptr1|549156,Poptr1|723239  
Poptr1|64992  
AT1G21450 Poptr1|714639,Poptr1|551373  
Poptr1|57650,Poptr1|345993  
Poptr1|566815,Poptr1|566817,Poptr1|581012,Poptr1|566816,Poptr1|572608,Poptr1|552534  
Poptr1|100269,Poptr1|586823,Poptr1|102789,Poptr1|559357  
AT1G63100 Poptr1|640539,Poptr1|646568  
AT2G37650 Poptr1|344252  
Poptr1|104243,Poptr1|571453,Poptr1|569054  
Poptr1|71829  
AT5G41920  
AT4G08250 Poptr1|552883,Poptr1|551479,Poptr1|559213  
Poptr1|575349  
AT5G48150 Poptr1|57335  
AT5G67411,AT3G49950 Poptr1|558929,Poptr1|553952  
AT1G14920,AT2G01570 Poptr1|726855,Poptr1|719856  
AT2G34740  
AT3G23360 Poptr1|658020,Poptr1|564956  
AT2G33700 Poptr1|693086,Poptr1|73178  
AT1G18030 Poptr1|733020  
Poptr1|99213  
AT1G67820 Poptr1|566003  
AT1G48040,AT3G17250 Poptr1|353982  
Poptr1|740842,Poptr1|592376  
AT2G40860 Poptr1|701296  
AT3G51470 Poptr1|694404,Poptr1|349879  
AT1G22280  
AT2G40180 Poptr1|720558,Poptr1|687309  
Poptr1|704729  
AT4G27800 Poptr1|732848  
AT5G53140 Poptr1|569504,Poptr1|666170  
AT3G15260 Poptr1|660915,Poptr1|579442  
AT5G24940,AT5G10740  
AT1G78200  
AT3G62260 Poptr1|552582,Poptr1|700379  
AT4G28400,AT2G20630 Poptr1|594652  
Poptr1|65933  
AT1G43900 Poptr1|559317,Poptr1|709869  
AT2G25620 Poptr1|578155,Poptr1|561836  
AT1G34750 Poptr1|685264,Poptr1|692658  
AT4G31750 Poptr1|737461,Poptr1|562025  
AT3G63340 Poptr1|694718  
Poptr1|732851  
AT3G27140,AT4G08260,AT2G30020,AT1G07160 Poptr1|54612,Poptr1|691510  
Poptr1|344225  
AT4G12240 Poptr1|350099  
AT5G52010 Poptr1|551832  
AT1G28070,AT2G33510 Poptr1|46266,Poptr1|350569  
AT5G55920,AT4G26600 Poptr1|691839  
AT4G17000 Poptr1|677420,Poptr1|691776,Poptr1|557575  
Poptr1|668415,Poptr1|549662  
AT5G14240  
Poptr1|569089  
AT5G54940 Poptr1|698348  
Poptr1|594466  
Poptr1|654547,Poptr1|682309  
AT5G54760,AT4G27130,AT1G54290 Poptr1|663349  
AT3G57610 Poptr1|688783  
AT5G62440 Poptr1|662756,Poptr1|595600  
AT3G48540 Poptr1|570257,Poptr1|575360  
AT5G03050 Poptr1|552402  
AT2G21970 Poptr1|562701,Poptr1|715978  
Poptr1|562700  
AT1G08220 Poptr1|650559  
AT3G29240 Poptr1|556354  
AT1G33780 Poptr1|738747  
AT2G01050,AT4G08820,AT5G10850,AT2G07740 Poptr1|71663  
AT5G48460 Poptr1|553250  
AT5G55400,AT4G26700 Poptr1|49373,Poptr1|687524  
AT2G04750,AT5G35700 Poptr1|57332  
AT5G53110,Poptr1|569515,Poptr1|574790  
AT1G28040,AT2G46495,AT5G36001,AT2G25410 Poptr1|552270  
Poptr1|350348,Poptr1|63426  
Poptr1|104623,Poptr1|579166,Poptr1|75434,Poptr1|562273  
AT4G36830  
AT1G75000 Poptr1|76241,Poptr1|591839  
AT5G13430,AT5G13440 Poptr1|548109,Poptr1|554683

AT4G18370  
AT3G27925 Poptr1|706718  
Poptr1|589177,Poptr1|590778,Poptr1|577786  
AT5G39830 Poptr1|694089  
Poptr1|556723  
AT2G32730,AT1G04810 Poptr1|688903,Poptr1|691704  
AT3G56460 Poptr1|704206  
Poptr1|62855  
AT1G80410 Poptr1|680579,Poptr1|705520,Poptr1|548659,Poptr1|553694  
Poptr1|641575,Poptr1|103593,Poptr1|63757  
Poptr1|63759,Poptr1|102739  
AT5G12900 Poptr1|547899  
AT1G03250 Poptr1|747010  
Poptr1|61608  
AT3G25100 Poptr1|666600  
AT3G26710 Poptr1|708084  
AT4G03180 Poptr1|573507,Poptr1|572745  
AT1G29965,AT2G34480,AT3G14600  
Poptr1|584490,Poptr1|595970,Poptr1|674082,Poptr1|544696,Poptr1|647815,Poptr1|728108,Poptr1|64336  
6  
AT3G45060,AT5G60780  
Poptr1|650503,Poptr1|585286,Poptr1|584432,Poptr1|595094  
AT1G08100,AT1G08090,AT5G60770 Poptr1|579894,Poptr1|54832,Poptr1|54833  
AT1G12940 Poptr1|662054,Poptr1|575213  
AT5G14570 Poptr1|691559  
Poptr1|568470,Poptr1|674792,Poptr1|107213  
AT3G47810  
AT5G35100 Poptr1|653521  
AT3G07670 Poptr1|573120  
AT1G31230,AT4G19710 Poptr1|592373  
Poptr1|591865  
AT5G21060 Poptr1|556861,Poptr1|594921  
AT3G11900  
Poptr1|51819  
AT5G65990  
AT4G38250,AT2G42005 Poptr1|54249,Poptr1|679959  
AT4G27860,AT4G27870,AT5G24290 Poptr1|569705,Poptr1|590147  
AT3G14430 Poptr1|572462  
AT3G17465 Poptr1|565468  
AT1G65710,AT5G37010 Poptr1|575860,Poptr1|699325  
AT4G15890 Poptr1|100480  
Poptr1|562275  
Poptr1|724336,Poptr1|345076  
AT2G43240,AT3G59360  
AT5G04500 Poptr1|725157  
AT2G33855 Poptr1|555757  
AT3G07890 Poptr1|343001,Poptr1|705201,Poptr1|700614  
AT1G62855  
AT1G62850 Poptr1|671184,Poptr1|646490  
AT2G42330,AT1G17070 Poptr1|571388,Poptr1|574017  
AT4G22750  
AT4G00840 Poptr1|572449  
Poptr1|581196,Poptr1|343578  
AT3G60800 Poptr1|347855  
Poptr1|572432  
AT4G09650 Poptr1|574320  
AT3G03320  
Poptr1|594557,Poptr1|562205  
AT2G43470  
AT3G14760 Poptr1|550356,Poptr1|584887  
AT5G22080 Poptr1|683788,Poptr1|697713  
AT3G49850,AT5G67580 Poptr1|53462,Poptr1|571967  
AT1G72740,AT1G17520,AT1G54260 Poptr1|561043,Poptr1|582938  
AT1G49950 Poptr1|49327,Poptr1|557527  
AT4G31300  
Poptr1|560689,Poptr1|584580  
AT3G17580,AT1G48330 Poptr1|697792  
AT1G61040 Poptr1|55759,Poptr1|555549  
AT2G25100  
Poptr1|344853  
Poptr1|582875  
AT2G43360 Poptr1|562258  
AT5G28900,AT5G28850 Poptr1|573723  
AT1G54450  
AT1G03960,AT5G44090 Poptr1|715218,Poptr1|684617  
Poptr1|574963  
AT2G30790,AT1G06680 Poptr1|551203,Poptr1|694679  
AT3G53760 Poptr1|57205  
AT1G20580,AT1G76300 Poptr1|652209,Poptr1|550771  
Poptr1|553139  
AT3G05470 Poptr1|581870  
AT3G07540,AT5G48360



AT4G15200 Poptr1|654561  
AT1G59910  
AT2G43800 Poptr1|668286,Poptr1|53046  
AT5G54650 Poptr1|571466,Poptr1|569060  
Poptr1|575096  
AT3G25500 Poptr1|553138,Poptr1|732586  
AT1G24150,AT1G70140 Poptr1|587955,Poptr1|354841,Poptr1|565390  
AT5G67470 Poptr1|72129,Poptr1|553967,Poptr1|684965  
AT5G26740 Poptr1|581577  
Poptr1|581581,Poptr1|97534,Poptr1|704332,Poptr1|704333  
AT3G05940  
AT5G52560 Poptr1|692753  
AT3G11510,AT2G36160,AT3G52580  
Poptr1|641003  
Poptr1|648403,Poptr1|727836,Poptr1|558193  
AT5G23300 Poptr1|53242,Poptr1|685192  
Poptr1|554139,Poptr1|739841  
AT1G04170  
AT4G18330,AT2G18720  
AT5G20170 Poptr1|703738  
AT3G53870,AT2G31610,AT5G35530  
Poptr1|570052,Poptr1|653831,Poptr1|666414,Poptr1|578006,Poptr1|597047  
AT5G39490,AT5G39480,AT5G39460,AT5G39450 Poptr1|53150,Poptr1|562506,Poptr1|558451  
AT5G39470  
AT4G00026 Poptr1|591721,Poptr1|692460  
AT3G49970,AT5G67385  
AT3G44820 Poptr1|556931  
AT3G22104 Poptr1|654565,Poptr1|59751  
AT5G48800 Poptr1|645415  
Poptr1|544968,Poptr1|568381  
Poptr1|564192  
AT3G08660,AT3G08570 Poptr1|577211  
AT1G30440 Poptr1|660645,Poptr1|707560  
AT2G14820 Poptr1|557502,Poptr1|49321  
AT5G10250 Poptr1|718782,Poptr1|71638  
AT3G03510,AT5G17580  
Poptr1|646180  
Poptr1|566010  
AT2G30520 Poptr1|574461,Poptr1|571926  
Poptr1|570863  
AT3G49900 Poptr1|72140  
AT3G15570,AT1G52770 Poptr1|548632,Poptr1|581566,Poptr1|349515  
AT1G50280,AT3G19850 Poptr1|353831  
AT3G26490  
AT4G31820 Poptr1|344768,Poptr1|702064  
AT5G64330 Poptr1|75551  
AT5G67440  
AT5G47800 Poptr1|560077  
AT5G48130  
AT1G03010 Poptr1|730684,Poptr1|57226  
AT3G50840,AT5G66560 Poptr1|71939,Poptr1|76214  
AT5G13600  
Poptr1|646179  
AT1G67900 Poptr1|658265,Poptr1|101806,Poptr1|345533  
AT5G03250 Poptr1|353376  
AT2G47860  
AT2G23050,AT4G37590 Poptr1|51875  
AT1G71696 Poptr1|52047  
Poptr1|347090  
AT2G28420 Poptr1|54664  
Poptr1|580048,Poptr1|583532,Poptr1|703769,Poptr1|741175,Poptr1|696148  
AT1G15380,AT1G80160 Poptr1|712435,Poptr1|640628  
Poptr1|562230  
AT2G27170  
Poptr1|594896  
Poptr1|574605  
Poptr1|649035  
AT3G07400 Poptr1|553234,Poptr1|645482  
Poptr1|558645,Poptr1|718965  
AT5G64760,AT5G09900  
AT4G06534  
AT4G06536 Poptr1|585907,Poptr1|59475,Poptr1|347635  
AT2G47390 Poptr1|348346,Poptr1|700400,Poptr1|348345  
AT1G69640,AT1G14290  
Poptr1|685342,Poptr1|710720,Poptr1|559449  
AT3G01720 Poptr1|691616  
AT1G56070 Poptr1|562883,Poptr1|562884,Poptr1|748394,Poptr1|558749  
Poptr1|348142  
AT5G25230,AT1G06220 Poptr1|669672,Poptr1|695243  
AT3G22980 Poptr1|581305,Poptr1|54302,Poptr1|556915,Poptr1|354334  
Poptr1|586017  
Poptr1|102405

AT2G31955 Poptr1|60838,Poptr1|558146  
AT2G30470 Poptr1|571905,Poptr1|571912  
AT4G21550  
AT4G32010 Poptr1|560988  
Poptr1|555506,Poptr1|568292  
AT4G34270 Poptr1|49309,Poptr1|686748  
AT4G10130 Poptr1|591922  
AT5G51110 Poptr1|570402  
Poptr1|570403,Poptr1|588187,Poptr1|580976,Poptr1|575504  
AT1G29810 Poptr1|100336  
AT4G14716,AT4G14710,AT2G26400 Poptr1|720245  
AT5G43850 Poptr1|720930  
Poptr1|698049  
Poptr1|576262  
AT2G33330,AT1G04520 Poptr1|564993,Poptr1|565821  
Poptr1|741014  
AT5G43980 Poptr1|343212  
AT3G60720  
AT3G04370 Poptr1|571113  
AT1G12400 Poptr1|54364,Poptr1|581185  
Poptr1|672996  
AT5G28960,AT5G28910 Poptr1|571107  
AT1G02740 Poptr1|551816,Poptr1|703154  
AT4G37280 Poptr1|76056  
AT5G15750 Poptr1|584628,Poptr1|583871  
AT5G30510 Poptr1|659138,Poptr1|696651  
AT5G02600  
AT3G53530,AT2G37390 Poptr1|576603  
AT3G24450 Poptr1|578421  
AT2G28660 Poptr1|706245  
AT2G15620 Poptr1|54502,Poptr1|704323  
AT1G04200 Poptr1|564880,Poptr1|698048  
AT4G24730 Poptr1|662067  
AT5G12240 Poptr1|649883,Poptr1|691492  
Poptr1|689611  
AT1G34320 Poptr1|574304  
AT5G08660 Poptr1|65186  
AT1G30755 Poptr1|642950,Poptr1|685441  
Poptr1|574305  
Poptr1|595199,Poptr1|576571  
AT3G52570  
Poptr1|595197,Poptr1|595195  
Poptr1|355915,Poptr1|592113  
AT5G50330,AT4G24810 Poptr1|733527,Poptr1|570210  
AT5G24130 Poptr1|106970,Poptr1|593592,Poptr1|591381,Poptr1|586560  
Poptr1|586562,Poptr1|574821,Poptr1|574819  
AT1G65230  
Poptr1|595867,Poptr1|596964  
AT1G68010 Poptr1|649205,Poptr1|713354  
AT2G32360 Poptr1|594464,Poptr1|75462  
AT5G02160  
Poptr1|652999  
AT5G42090 Poptr1|554569,Poptr1|48648  
AT3G09570,AT5G18520 Poptr1|701493,Poptr1|561523  
AT5G02630  
Poptr1|56678  
AT1G22050,AT1G77870  
AT3G26980 Poptr1|690535,Poptr1|707072  
AT3G01050,AT5G15460 Poptr1|545916  
Poptr1|347337  
AT4G24990 Poptr1|666717,Poptr1|687831  
AT1G69840 Poptr1|577584  
AT5G62740  
Poptr1|658442  
Poptr1|97404,Poptr1|355785,Poptr1|577585  
AT5G51570 Poptr1|666917,Poptr1|728640  
AT3G01290  
AT1G76260,AT1G20540 Poptr1|550783  
Poptr1|64284  
AT2G13770,AT1G24370,AT3G30190  
Poptr1|103117,Poptr1|561179,Poptr1|52218,Poptr1|640586  
Poptr1|675091  
Poptr1|58469  
Poptr1|76089  
Poptr1|349200  
AT3G15310,AT5G32621,AT5G34838,AT2G14730,AT2G10980  
Poptr1|577824  
Poptr1|64016  
AT1G43590  
AT2G07520  
Poptr1|64408  
Poptr1|677504

Poptr1|553241  
AT3G07430,AT4G27990  
AT2G30330 Poptr1|729248  
AT1G36940 Poptr1|347313,Poptr1|559175  
Poptr1|574218  
Poptr1|672845,Poptr1|672844  
AT1G33980 Poptr1|672843  
AT1G23320,AT1G70560 Poptr1|354790  
AT1G34040,AT1G34060 Poptr1|342345,Poptr1|710255  
AT4G24670 Poptr1|575217,Poptr1|570115  
AT3G17950 Poptr1|575024,Poptr1|661665  
AT5G65158  
Poptr1|693531  
AT4G39730,AT2G22170 Poptr1|562619,Poptr1|558549,Poptr1|562620,Poptr1|71655  
AT5G62290 Poptr1|701134,Poptr1|662452  
AT4G17620 Poptr1|689461  
AT2G46060 Poptr1|572286  
AT5G09580 Poptr1|65364  
AT1G53345 Poptr1|580614  
AT4G15770 Poptr1|671618  
AT2G26210 Poptr1|561546  
Poptr1|578848,Poptr1|594164  
AT4G32060 Poptr1|596166,Poptr1|58580  
Poptr1|655702,Poptr1|698777,Poptr1|107175,Poptr1|569680,Poptr1|593121,Poptr1|107203  
Poptr1|561174  
AT5G05650 Poptr1|568646  
AT3G11700,AT5G06390,AT3G52370,AT2G35860  
AT1G36310 Poptr1|551529  
AT1G14990  
Poptr1|698193,Poptr1|696529  
AT2G36650 Poptr1|71862  
AT1G52080 Poptr1|349647,Poptr1|99099,Poptr1|548930  
AT3G18480 Poptr1|569871  
AT2G21385 Poptr1|557193,Poptr1|556523  
AT4G01560 Poptr1|592750,Poptr1|679745,Poptr1|644687,Poptr1|731491  
AT1G33040,AT4G10480  
Poptr1|560323,Poptr1|682024  
AT5G13850,AT3G12390  
AT3G49470 Poptr1|104734,Poptr1|574643,Poptr1|345775  
AT1G80720,AT1G15870 Poptr1|690902  
AT4G31930 Poptr1|561965  
AT2G39795,AT3G55605,AT2G46190,AT2G39790  
AT5G02050 Poptr1|735610,Poptr1|653026,Poptr1|647926  
AT5G05990 Poptr1|567368,Poptr1|659621  
AT2G46505  
AT1G58983,AT1G58684,AT1G59359,AT1G58380,AT2G41840,AT3G57490 Poptr1|652732,Poptr1|576349  
Poptr1|549239  
AT3G17611,Poptr1|725590  
AT1G21410,AT1G77000 Poptr1|684529,Poptr1|694597  
AT5G66020,AT3G51460 Poptr1|716159  
AT3G51830  
Poptr1|576989,Poptr1|576990  
AT1G14530,AT2G02180 Poptr1|721173,Poptr1|687125  
AT4G21790 Poptr1|567990,Poptr1|647588  
Poptr1|568686  
Poptr1|553216,Poptr1|349937  
AT1G32160 Poptr1|595140,Poptr1|349936  
AT1G48450,AT3G17800 Poptr1|569371,Poptr1|704104  
AT5G48590,AT3G07310 Poptr1|553215  
AT3G04830,AT5G28220  
Poptr1|587972,Poptr1|681403,Poptr1|662899,Poptr1|683284,Poptr1|680158,Poptr1|597175  
AT1G60550  
Poptr1|587290,Poptr1|691647,Poptr1|108879  
Poptr1|595931,Poptr1|557599  
AT5G03330 Poptr1|745925,Poptr1|589459  
AT5G04250 Poptr1|563715,Poptr1|655877  
AT2G39320  
AT3G02070 Poptr1|732004  
AT3G22260 Poptr1|652462,Poptr1|688656  
Poptr1|725034  
AT3G61350 Poptr1|572245  
Poptr1|689087  
AT1G55270 Poptr1|547631,Poptr1|555226  
AT1G30090 Poptr1|561242  
Poptr1|561959  
AT2G24540  
AT1G16250 Poptr1|725585  
AT2G29900 Poptr1|60025  
AT1G08700  
AT5G56550 Poptr1|64085  
Poptr1|640242,Poptr1|712728  
AT5G05720,AT4G19610

AT3G54460 Poptr1|350861  
Poptr1|582221  
AT1G16770 Poptr1|590397,Poptr1|582218,Poptr1|584782,Poptr1|588880,Poptr1|585631  
Poptr1|58541,Poptr1|344712  
Poptr1|733337,Poptr1|345944  
AT5G25430,AT4G32510  
AT3G06450 Poptr1|352121  
AT2G47160,AT3G62270 Poptr1|552579  
AT1G74810,AT1G15460 Poptr1|349502,Poptr1|63713  
Poptr1|345172  
AT5G58180  
AT5G58060 Poptr1|561300,Poptr1|738035  
AT5G59560 Poptr1|555033,Poptr1|593302,Poptr1|547822  
AT2G38640 Poptr1|668268,Poptr1|589592  
Poptr1|578928,Poptr1|685785  
Poptr1|589589,Poptr1|701713  
AT3G15810  
AT1G80120 Poptr1|740895,Poptr1|705853  
AT5G41590 Poptr1|48712,Poptr1|350283  
AT2G11000Poptr1|680181,Poptr1|669735,Poptr1|560565  
AT5G11500Poptr1|683084,Poptr1|695031  
AT3G62990,AT2G47950 Poptr1|552643,Poptr1|572767  
AT3G14740 Poptr1|65643,Poptr1|99452  
AT5G24880,AT5G10660 Poptr1|583147  
AT2G33540 Poptr1|646986,Poptr1|708815  
AT2G47840 Poptr1|342068  
AT5G55710 Poptr1|580837,Poptr1|594871  
AT5G58730 Poptr1|64262,Poptr1|557924  
AT5G08180 Poptr1|566716,Poptr1|564435  
AT1G29950 Poptr1|568451  
AT2G41430 Poptr1|695573,Poptr1|576219  
AT4G14270 Poptr1|712669,Poptr1|690883  
Poptr1|553090  
Poptr1|584312  
Poptr1|691244  
AT5G23390 Poptr1|563422  
Poptr1|63874,Poptr1|674878  
AT1G71240  
AT2G21720 Poptr1|56728  
AT1G48840,AT3G18350 Poptr1|569816,Poptr1|57510  
Poptr1|643698,Poptr1|716554  
Poptr1|710999  
Poptr1|655604  
AT1G36320  
AT4G37920 Poptr1|655603  
AT5G35600  
AT5G63110Poptr1|575223,Poptr1|570119  
AT3G44680  
AT3G44660,AT3G44490  
Poptr1|569317,Poptr1|684089  
AT4G38130 Poptr1|703587  
AT1G26470 Poptr1|659219,Poptr1|656512  
AT5G08260 Poptr1|686026  
Poptr1|107016,Poptr1|574071  
Poptr1|647734  
Poptr1|558308,Poptr1|558307,Poptr1|584443  
AT5G23210  
AT3G56540,AT3G52020,AT3G52010,AT3G52000,AT2G05850,AT3G63470  
Poptr1|697532,Poptr1|683848,Poptr1|64506,Poptr1|557828  
AT3G07990 Poptr1|353406,Poptr1|724940  
AT2G33530,AT1G28110 Poptr1|554702,Poptr1|708823  
Poptr1|559335,Poptr1|551354  
Poptr1|576148,Poptr1|560360,Poptr1|576136,Poptr1|576150  
Poptr1|71796  
AT3G45010,AT5G22980  
AT3G17180  
AT3G02110Poptr1|668664,Poptr1|545862  
AT4G15100,AT1G11080 Poptr1|568263,Poptr1|555534  
AT1G15000 Poptr1|564615,Poptr1|656911,Poptr1|595362  
Poptr1|669575  
Poptr1|733758,Poptr1|356125  
Poptr1|576152  
AT5G22960  
Poptr1|592649,Poptr1|560366,Poptr1|675011,Poptr1|560367  
AT2G12480,AT5G42240,AT5G42230,AT1G43780  
AT2G35770 Poptr1|344912  
AT3G10410 Poptr1|696969,Poptr1|698686  
AT3G25420,AT4G12910 Poptr1|700678  
AT2G24000,AT2G24010  
AT4G30810

AT2G35780  
AT1G61130  
AT4G30610 Poptr1|578732,Poptr1|344497  
Poptr1|566496  
Poptr1|587944,Poptr1|578708  
Poptr1|71795  
AT2G36070,AT2G20510 Poptr1|694761,Poptr1|551037  
AT5G04120  
AT3G50520 Poptr1|682337  
Poptr1|579742  
AT4G22260  
Poptr1|727508,Poptr1|584739  
AT4G37445 Poptr1|674820  
AT5G14930 Poptr1|665182,Poptr1|573546,Poptr1|65311,Poptr1|591485,Poptr1|591484  
AT2G44040,AT3G59890 Poptr1|654319,Poptr1|746315  
AT1G80770 Poptr1|551933  
AT1G63970 Poptr1|709270,Poptr1|646669  
AT3G06140,AT5G19080 Poptr1|565648,Poptr1|354939  
AT5G03200,AT3G09770,AT3G53410  
Poptr1|576682,Poptr1|589425  
Poptr1|570874,Poptr1|742246  
Poptr1|65118  
AT5G64250 Poptr1|736065  
AT3G06290 Poptr1|565684  
AT3G54380 Poptr1|62829  
AT1G08125 Poptr1|723635  
Poptr1|356565  
AT5G44170 Poptr1|679655  
AT1G06510 Poptr1|651678  
Poptr1|556436,Poptr1|563685  
AT2G27760  
AT3G23630  
AT3G63110  
AT5G19040 Poptr1|354931  
AT3G19160,AT1G68460,AT4G24650,AT1G25410 Poptr1|564538  
AT3G04990 Poptr1|595516,Poptr1|595518  
AT5G38895  
AT5G05910  
AT4G23450  
AT5G15790,AT3G02290 Poptr1|583858,Poptr1|584618  
Poptr1|591605  
AT4G00335 Poptr1|644484,Poptr1|731133  
AT5G41350 Poptr1|709312,Poptr1|712348  
AT2G36010 Poptr1|576527,Poptr1|716859  
AT1G47870 Poptr1|73027,Poptr1|550895  
AT5G22220 Poptr1|54270,Poptr1|59865  
AT5G45090,AT1G33920,AT4G19850  
AT4G19840 Poptr1|746947,Poptr1|100228,Poptr1|575604  
AT5G08560 Poptr1|353100  
Poptr1|559520,Poptr1|551205  
Poptr1|551204  
AT5G43920 Poptr1|730589  
AT1G16650 Poptr1|562888  
AT3G59310,AT3G59340,AT3G59330,AT3G59320 Poptr1|552805  
Poptr1|680637,Poptr1|59581  
AT2G17695 Poptr1|741193  
AT4G23040,AT4G11740 Poptr1|683697,Poptr1|554317  
AT4G00752 Poptr1|730970  
AT5G14440,AT5G40570 Poptr1|641672  
AT2G37300 Poptr1|576625,Poptr1|561537  
AT1G59520 Poptr1|347562,Poptr1|700118  
Poptr1|71947,Poptr1|76190  
AT2G23530,AT4G37110  
Poptr1|687729  
Poptr1|684367  
Poptr1|590175  
AT1G02080 Poptr1|677589,Poptr1|644300  
Poptr1|677591  
Poptr1|577410,Poptr1|712440  
AT1G67320  
AT1G72970 Poptr1|59606,Poptr1|703910  
AT1G12570 Poptr1|548528  
AT5G51930,AT3G56060,AT5G51950 Poptr1|356296  
AT1G14190,AT1G14185 Poptr1|353849,Poptr1|567035,Poptr1|567036  
Poptr1|570507,Poptr1|596582,Poptr1|592098  
Poptr1|105685,Poptr1|597512  
AT1G73050 Poptr1|584070,Poptr1|567819,Poptr1|563477  
Poptr1|707016  
AT1G27390 Poptr1|684782,Poptr1|640016  
AT3G27080,AT3G27070,AT5G40930  
AT2G26300 Poptr1|352591,Poptr1|689004  
Poptr1|640516,Poptr1|554336

Poptr1|356238  
AT4G00670  
AT3G48940,AT5G23750 Poptr1|701188,Poptr1|662340  
AT3G61260,AT2G45820 Poptr1|552155,Poptr1|688146  
AT5G10780 Poptr1|689074,Poptr1|694954  
AT2G25240,AT2G26390,AT3G45220  
Poptr1|583864,Poptr1|105271,Poptr1|98842,Poptr1|582701,Poptr1|583867  
AT2G35580  
Poptr1|99276  
Poptr1|591882  
AT1G64020 Poptr1|569877  
AT1G62170,AT2G14540,AT1G64030,AT1G64010,AT1G51330,AT1G63280  
AT1G47710 Poptr1|591883  
AT5G10470  
AT5G65460 Poptr1|76447  
Poptr1|647216  
AT4G40040 Poptr1|719701  
Poptr1|715371  
AT5G10980  
AT5G65360  
Poptr1|650690  
AT4G40030  
Poptr1|647215  
Poptr1|595937  
AT1G09200  
Poptr1|747465,Poptr1|672228,Poptr1|639900,Poptr1|62989,Poptr1|554937,Poptr1|47643,Poptr1|350773  
AT5G10400  
Poptr1|643807  
AT1G01370  
AT5G65350  
Poptr1|715331  
AT5G12910  
AT5G10390  
Poptr1|710567  
Poptr1|654735  
AT3G27360  
AT1G19890  
AT1G13370,AT1G75600  
Poptr1|593870  
AT4G11720Poptr1|350179,Poptr1|63588  
AT2G25110Poptr1|669144,Poptr1|654227  
AT2G27450 Poptr1|594963  
AT1G21370 Poptr1|710769  
AT1G31410 Poptr1|590137,Poptr1|554142  
AT5G63290 Poptr1|666598,Poptr1|570203  
Poptr1|590503  
AT1G80750 Poptr1|693215,Poptr1|690900  
AT2G44120,AT2G01250,AT3G13580 Poptr1|652850,Poptr1|579008,Poptr1|698749,Poptr1|655662  
Poptr1|556424  
AT3G50800,AT5G66580  
AT4G37240,AT2G23690 Poptr1|651016,Poptr1|719402  
Poptr1|694142  
AT3G20810 Poptr1|48535  
AT5G37478 Poptr1|592874  
AT3G01015,AT5G15510 Poptr1|668651  
Poptr1|357191,Poptr1|546644  
Poptr1|564906,Poptr1|682567  
AT1G52825,AT4G14615  
AT5G51880 Poptr1|570531,Poptr1|575740  
Poptr1|583732  
Poptr1|49381  
AT5G55580 Poptr1|590262  
AT5G67140 Poptr1|53303,Poptr1|651089  
Poptr1|661833  
AT3G42660 Poptr1|574885,Poptr1|661832  
AT3G13440  
Poptr1|554632  
AT1G05350 Poptr1|570256,Poptr1|733614  
AT5G10460 Poptr1|580406  
Poptr1|347227  
AT1G44120,AT1G77460 Poptr1|685298  
AT2G22125 Poptr1|558578,Poptr1|562644  
Poptr1|686139  
Poptr1|678758  
Poptr1|680730  
AT4G15340,AT4G15370,AT5G48010,AT1G78500,AT5G36150,AT5G42600  
Poptr1|557741  
AT1G66960,AT1G78960,AT1G78970  
Poptr1|597517  
Poptr1|592495  
AT1G78480 Poptr1|102819  
AT2G07050 Poptr1|717351,Poptr1|584549

Poptr1|579920  
Poptr1|97981,Poptr1|102820  
Poptr1|747643  
Poptr1|546595,Poptr1|101026,Poptr1|546344  
AT1G78950,AT1G78955 Poptr1|563377,Poptr1|744763  
AT3G45130 Poptr1|344217  
Poptr1|582229  
Poptr1|48552,Poptr1|102941  
AT2G42070 Poptr1|561250,Poptr1|576252  
Poptr1|580964  
Poptr1|561251  
AT3G44310,AT3G44300,AT3G44320,AT5G22300 Poptr1|576545,Poptr1|352473  
Poptr1|556830,Poptr1|556831  
Poptr1|566884,Poptr1|566883  
Poptr1|566885,Poptr1|687234,Poptr1|723971,Poptr1|687235  
AT3G17210 Poptr1|565393,Poptr1|657714  
AT3G58660,AT2G42650,AT1G06380 Poptr1|570417  
AT1G22200  
AT1G36050 Poptr1|685267,Poptr1|342472  
Poptr1|685070,Poptr1|683753  
AT3G22290 Poptr1|652474,Poptr1|576041  
Poptr1|677352,Poptr1|557139,Poptr1|546173,Poptr1|579650,Poptr1|649283,Poptr1|557138  
Poptr1|739464,Poptr1|735494,Poptr1|723536,Poptr1|563742,Poptr1|567607  
Poptr1|682262,Poptr1|701598  
Poptr1|687327,Poptr1|656216,Poptr1|711735  
AT2G39010,AT3G54820  
Poptr1|356845,Poptr1|593805  
AT2G37180,AT2G37170,AT3G53420,AT5G60660  
Poptr1|560889  
Poptr1|590872  
AT2G16850,AT4G35100 Poptr1|721668,Poptr1|648808  
AT4G00430,AT1G01620,AT2G45960,AT3G61430,AT4G23400  
AT4G37190 Poptr1|65457  
AT3G23400 Poptr1|697876,Poptr1|696358  
AT3G45900 Poptr1|676666  
Poptr1|688655,Poptr1|691590,Poptr1|560241  
AT3G22230,AT4G15000,AT2G32220  
AT4G34100 Poptr1|107844,Poptr1|557409,Poptr1|65203  
AT3G06710  
AT4G32670  
AT1G21640 Poptr1|347211,Poptr1|714589  
AT2G46890 Poptr1|700338  
AT4G20880,AT5G44350 Poptr1|672206,Poptr1|550600  
AT1G52590 Poptr1|596066  
AT2G32920,AT1G04980 Poptr1|732350  
AT2G02560  
Poptr1|703806,Poptr1|583461  
Poptr1|678775  
AT2G07715 Poptr1|101788,Poptr1|589222,Poptr1|571672  
Poptr1|581036  
AT3G27090 Poptr1|683950,Poptr1|597161  
AT2G35140 Poptr1|666861  
AT5G42050 Poptr1|709134,Poptr1|684840  
AT1G77230 Poptr1|551394  
AT5G23090,AT5G08190 Poptr1|699492,Poptr1|680893  
AT1G05385 Poptr1|564841  
AT1G29040 Poptr1|728220  
AT4G37610  
AT1G05690 Poptr1|562133,Poptr1|688890  
AT5G67480 Poptr1|349832  
AT5G63160,AT3G48360 Poptr1|700976,Poptr1|570187  
AT2G07671 Poptr1|594183,Poptr1|681382,Poptr1|107958  
AT2G01100  
AT4G19190 Poptr1|596871  
Poptr1|565312  
AT3G63130 Poptr1|684576,Poptr1|72758  
AT3G06000,AT5G19320 Poptr1|566279  
AT1G30590,AT2G39240,AT2G34750 Poptr1|562890,Poptr1|71863  
AT4G28706 Poptr1|553276  
AT5G43910  
Poptr1|597594  
AT1G50575 Poptr1|354704  
Poptr1|583200,Poptr1|690528  
AT1G54080,AT3G14100,AT1G17370 Poptr1|673211,Poptr1|645804  
AT3G14595  
AT1G17080 Poptr1|642408  
AT1G53560  
AT1G29970  
AT3G26670 Poptr1|590564,Poptr1|700493  
AT2G02710 Poptr1|696331  
Poptr1|725225  
AT1G16780,AT1G78920

Poptr1|690237,Poptr1|699694  
Poptr1|595002,Poptr1|583449,Poptr1|681427,Poptr1|591430,Poptr1|660016,Poptr1|591431,Poptr1|75933,  
Poptr1|661376,Poptr1|672734  
AT1G15690 Poptr1|578868,Poptr1|704742  
Poptr1|563427  
AT3G59390 Poptr1|588685  
AT3G44735 Poptr1|594834,Poptr1|556949  
AT1G03920  
AT4G33080 Poptr1|344605  
AT2G19400 Poptr1|592473,Poptr1|561038  
AT3G23310,AT4G14350 Poptr1|54963,Poptr1|345450  
AT5G09890 Poptr1|591951,Poptr1|692530  
AT2G20470 Poptr1|346825,Poptr1|72909  
AT1G30640  
Poptr1|561039  
AT2G02170 Poptr1|55172,Poptr1|696469  
Poptr1|591675  
AT1G67590 Poptr1|565066  
Poptr1|576341,Poptr1|351543  
AT1G30320 Poptr1|691800  
AT1G53860 Poptr1|99021  
AT2G41870  
AT3G57540 Poptr1|581843  
AT5G57570,AT5G57640,AT2G03230,AT5G02210,AT1G14060 Poptr1|574259,Poptr1|592379  
AT5G52950 Poptr1|106986,Poptr1|569457  
AT1G54120,AT3G14060 Poptr1|673194,Poptr1|349434  
AT1G60450  
AT1G09350,AT1G56600 Poptr1|744421,Poptr1|570688,Poptr1|570686  
Poptr1|353985,Poptr1|55348  
AT2G47180 Poptr1|552572,Poptr1|572572  
AT1G60470 Poptr1|106463,Poptr1|565191,Poptr1|658324  
AT5G23790,AT4G26250,AT5G30500  
AT1G05150,AT2G32450 Poptr1|550939,Poptr1|694819  
AT5G61460,AT5G07660 Poptr1|684930  
AT1G11915Poptr1|99324,Poptr1|568058  
Poptr1|659213,Poptr1|564299,Poptr1|562580  
AT1G10380 Poptr1|566080  
AT3G44716 Poptr1|649095  
AT3G07450,AT3G52130 Poptr1|64589  
Poptr1|582239  
AT4G21490,AT4G05020 Poptr1|660452,Poptr1|694032  
Poptr1|588332  
AT4G28220 Poptr1|730525  
AT2G20800 Poptr1|571796  
AT5G40690 Poptr1|641734,Poptr1|691609  
Poptr1|570168,Poptr1|575248  
AT1G67810  
AT5G50210  
AT5G43190 Poptr1|342573  
AT4G27940 Poptr1|728817,Poptr1|705028  
AT2G46320 Poptr1|348050  
AT4G31560 Poptr1|554988,Poptr1|547862  
AT1G28140 Poptr1|593460,Poptr1|691119  
Poptr1|640687  
Poptr1|553696  
AT1G15660 Poptr1|553697  
AT1G01760 Poptr1|731067  
AT3G61620 Poptr1|700269  
Poptr1|562395  
AT1G58120 Poptr1|347458  
AT1G16570 Poptr1|583054  
AT1G78410 Poptr1|65605,Poptr1|568607  
AT5G64170 Poptr1|63915,Poptr1|640811  
AT3G27220 Poptr1|99628,Poptr1|691622  
AT1G51540 Poptr1|720506,Poptr1|567787  
AT4G35530 Poptr1|702020  
AT5G08600,AT4G02400  
AT5G36980 Poptr1|644765  
Poptr1|664422  
Poptr1|596991  
AT5G16520 Poptr1|596992  
AT3G63390 Poptr1|346930  
Poptr1|571652,Poptr1|581035  
Poptr1|571653,Poptr1|581034  
Poptr1|643687,Poptr1|559173  
AT5G09320 Poptr1|54240  
AT3G19770  
AT1G67070  
AT3G02570 Poptr1|545348,Poptr1|60396  
AT1G04210 Poptr1|354522,Poptr1|698044  
AT5G24170 Poptr1|583975,Poptr1|593330,Poptr1|569529  
AT5G23550 Poptr1|714561



AT4G03280 Poptr1|574577,Poptr1|700065  
 AT4G24090 Poptr1|61025  
 Poptr1|545039  
 AT3G56310 Poptr1|738687  
 AT5G08370 Poptr1|566552  
 AT5G08380 Poptr1|567747  
 AT3G52710,AT2G36220 Poptr1|576593,Poptr1|561501  
 AT1G34630 Poptr1|559109,Poptr1|692660  
 AT1G21830 Poptr1|716656,Poptr1|551458  
 AT1G44608  
 AT1G06660,AT2G30820 Poptr1|559510,Poptr1|347025  
 Poptr1|589695  
 AT3G53020,AT2G36620  
 Poptr1|570470,Poptr1|591612,Poptr1|589696,Poptr1|734141,Poptr1|555988,Poptr1|576537,Poptr1|68205  
 2  
 AT1G33400 Poptr1|577257  
 Poptr1|577258  
 AT1G20000  
 AT4G20280 Poptr1|554634,Poptr1|48621  
 Poptr1|65852  
 AT1G16610 Poptr1|687635  
 AT1G79100  
 AT5G11640Poptr1|561741  
 AT2G02800,AT1G14370 Poptr1|687114,Poptr1|345383  
 Poptr1|109157,Poptr1|106304,Poptr1|596681  
 AT4G00710 Poptr1|731084,Poptr1|552160  
 Poptr1|568357  
 AT4G21400,AT4G21410,AT4G00960,AT4G00970,AT4G38830,AT4G21230  
 Poptr1|578982,Poptr1|578755  
 AT1G80640  
 AT2G23770 Poptr1|655239,Poptr1|593989  
 Poptr1|591637  
 Poptr1|579198  
 Poptr1|584268,Poptr1|720623  
 Poptr1|583042,Poptr1|98370,Poptr1|568827  
 Poptr1|569813  
 AT5G11410,AT5G11400,AT5G03350,AT5G25440  
 AT3G01490 Poptr1|577520,Poptr1|549474  
 AT1G18160,AT1G73660 Poptr1|345804,Poptr1|733075  
 Poptr1|576114  
 AT1G21250,AT1G21240,AT1G21230,AT1G21270,AT1G21210,AT3G25490  
 Poptr1|76437  
 AT2G24360,AT4G31170 Poptr1|60825,Poptr1|100074,Poptr1|583203,Poptr1|705025  
 AT2G45910 Poptr1|57030,Poptr1|711039  
 Poptr1|588616  
 Poptr1|568635  
 Poptr1|586856  
 Poptr1|594439  
 AT1G09440  
 Poptr1|591119,Poptr1|568643,Poptr1|588709  
 Poptr1|561605  
 Poptr1|578582  
 AT5G55830 Poptr1|642314,Poptr1|55852  
 Poptr1|661051  
 AT2G28940 Poptr1|54746,Poptr1|49006  
 AT5G01060,AT3G09240  
 Poptr1|741016,Poptr1|592840,Poptr1|648213,Poptr1|545561,Poptr1|706543  
 AT2G45590 Poptr1|342713,Poptr1|56984  
 Poptr1|107544,Poptr1|574797,Poptr1|663636  
 AT5G03140,AT3G53380  
 Poptr1|590198  
 AT4G03230 Poptr1|729183  
 AT3G51550 Poptr1|668221,Poptr1|561003  
 Poptr1|550090,Poptr1|555430,Poptr1|104392,Poptr1|593319,Poptr1|556151,Poptr1|64717  
 Poptr1|582063  
 AT2G17090 Poptr1|582062  
 Poptr1|565618  
 Poptr1|575727,Poptr1|356330  
 AT2G46850 Poptr1|348177  
 AT1G15530 Poptr1|662034,Poptr1|666524  
 AT1G11330,AT1G11350,AT1G11300  
 Poptr1|591415,Poptr1|568346,Poptr1|568344,Poptr1|586667,Poptr1|589261,Poptr1|568343,Poptr1|58808  
 8,Poptr1|55789,Poptr1|597238,Poptr1|568334,Poptr1|568339,Poptr1|589264,Poptr1|568338,Poptr1|544930,Poptr1|54  
 4931  
 Poptr1|549461  
 Poptr1|705613,Poptr1|575189,Poptr1|641974,Poptr1|99908,Poptr1|585946,Poptr1|585465,Poptr1|101716,  
 Poptr1|580011,Poptr1|580022  
 AT5G18500 Poptr1|565460,Poptr1|596054  
 AT4G00955  
 AT3G57770 Poptr1|108524  
 Poptr1|591432

Poptr1|581123  
AT1G26970,AT1G69790  
Poptr1|550409  
Poptr1|579387,Poptr1|550702,Poptr1|572526  
AT1G01540 Poptr1|700244  
AT5G06740 Poptr1|653485,Poptr1|667365  
Poptr1|572263  
AT4G38470 Poptr1|648834,Poptr1|597701  
Poptr1|581131  
AT5G11020  
AT2G48010 Poptr1|591129  
AT1G17540,AT1G72760  
AT4G11900Poptr1|590406  
Poptr1|581559,Poptr1|584003  
AT5G15730 Poptr1|583873,Poptr1|61045  
AT1G66460,AT5G37790 Poptr1|555947,Poptr1|692133  
AT4G17660,AT5G47070  
Poptr1|555157  
Poptr1|584275,Poptr1|733393  
AT5G02070 Poptr1|351817  
Poptr1|565412  
Poptr1|574308,Poptr1|574310,Poptr1|592210  
Poptr1|560795  
Poptr1|578194  
Poptr1|544894,Poptr1|104422  
AT1G10620  
Poptr1|592476,Poptr1|106689  
Poptr1|580277  
Poptr1|644329  
AT5G39370  
AT2G33580 Poptr1|560030  
AT5G01550,AT5G01560,AT5G01540,AT3G08870  
Poptr1|577036,Poptr1|577038,Poptr1|106230,Poptr1|344319  
Poptr1|747080  
Poptr1|55997  
Poptr1|108496  
Poptr1|559278  
AT4G18950 Poptr1|713781  
Poptr1|103440,Poptr1|569964,Poptr1|581954,Poptr1|725732,Poptr1|681117  
AT5G56460 Poptr1|62672,Poptr1|555179  
Poptr1|560796  
Poptr1|674141  
Poptr1|351510  
AT1G16260  
Poptr1|106266,Poptr1|99906,Poptr1|680155,Poptr1|555156,Poptr1|647407,Poptr1|748283,Poptr1|594890,  
Poptr1|679328,Poptr1|547713,Poptr1|62795,Poptr1|747795,Poptr1|62804,Poptr1|554919,Poptr1|555153,Poptr1|6472  
06,Poptr1|678820,Poptr1|679848,Poptr1|594881,Poptr1|103406,Poptr1|579629,Poptr1|547716,Poptr1|547708,Poptr1|  
106912,Poptr1|343922,Poptr1|678814,Poptr1|555154,Poptr1|556892,Poptr1|556874,Poptr1|556873,Poptr1|556899,P  
optr1|584556,Poptr1|584552,Poptr1|592146,Poptr1|584555,Poptr1|105946,Poptr1|559486,Poptr1|572911  
Poptr1|595918  
AT5G57680  
Poptr1|549179,Poptr1|558080  
Poptr1|660409,Poptr1|647725,Poptr1|580364  
Poptr1|596269,Poptr1|571157  
AT1G19090 Poptr1|570143  
Poptr1|586817,Poptr1|586813,Poptr1|102791,Poptr1|562411,Poptr1|562416,Poptr1|102788,Poptr1|10026  
6,Poptr1|586812,Poptr1|595939,Poptr1|562417,Poptr1|595391,Poptr1|590947,Poptr1|562419  
Poptr1|544880,Poptr1|727616,Poptr1|353156,Poptr1|544906,Poptr1|544884,Poptr1|544882,Poptr1|58847  
8,Poptr1|568226,Poptr1|544902  
AT2G01780  
AT5G54380 Poptr1|568958  
Poptr1|562858  
AT3G57710,AT3G57730,AT3G57720  
AT1G76360 Poptr1|710730,Poptr1|52270  
AT4G04490,AT4G04500,AT4G04570,AT4G04540,AT4G04510  
AT3G55950 Poptr1|55474,Poptr1|564026  
AT5G23170 Poptr1|596716  
AT4G28670  
AT5G11850Poptr1|352684  
AT4G35230 Poptr1|556715,Poptr1|557003  
Poptr1|594076,Poptr1|678873  
Poptr1|561882,Poptr1|580662  
AT4G10390,AT1G33260 Poptr1|103598,Poptr1|65828  
Poptr1|557031  
Poptr1|106716  
Poptr1|573592,Poptr1|694110,Poptr1|593705  
Poptr1|578983,Poptr1|744312  
Poptr1|676675  
AT1G29720  
Poptr1|568649,Poptr1|101225,Poptr1|705174,Poptr1|100644,Poptr1|588708,Poptr1|568638,Poptr1|58766  
8,Poptr1|587675,Poptr1|108001,Poptr1|670243,Poptr1|647811,Poptr1|568496,Poptr1|568652,Poptr1|568644,Poptr1|5  
45118,Poptr1|581280

Poptr1|563810,Poptr1|567531  
Poptr1|570820  
AT1G51620  
AT5G54590  
AT1G54820 Poptr1|595573,Poptr1|729648  
Poptr1|108812  
AT5G66790  
Poptr1|656859,Poptr1|658832  
AT1G62400 Poptr1|61077,Poptr1|55733  
Poptr1|559356  
AT2G21480,AT4G39110 Poptr1|557210,Poptr1|546679  
Poptr1|565773  
AT3G50730,AT3G50720  
Poptr1|577774  
AT5G47850 Poptr1|592330  
Poptr1|345196  
Poptr1|588318  
AT5G02800 Poptr1|589374  
Poptr1|574925  
Poptr1|734399  
Poptr1|106545  
AT5G18610 Poptr1|686997,Poptr1|565365  
Poptr1|597602  
AT1G66930,AT1G67000,AT1G66910,AT5G38260,AT5G38250,AT5G38240,AT1G66920  
Poptr1|99249,Poptr1|589034,Poptr1|568368  
AT5G39020,AT5G39030  
AT1G53070  
Poptr1|742634,Poptr1|558276  
AT5G58940  
Poptr1|556897  
AT3G57120 Poptr1|568901  
Poptr1|63015,Poptr1|585535  
Poptr1|351630,Poptr1|578966  
AT5G60090,AT5G60080  
Poptr1|568992,Poptr1|582060,Poptr1|582054,Poptr1|569001,Poptr1|748131,Poptr1|97846,Poptr1|582026,  
Poptr1|568999,Poptr1|569000,Poptr1|704436  
Poptr1|593663,Poptr1|585088,Poptr1|585079,Poptr1|105293  
Poptr1|584944,Poptr1|65714,Poptr1|578987,Poptr1|674894  
Poptr1|97876  
Poptr1|578985  
Poptr1|547709,Poptr1|594877,Poptr1|547719  
Poptr1|103578  
Poptr1|596195  
AT1G72540 Poptr1|98974,Poptr1|349443  
Poptr1|106565  
Poptr1|571604,Poptr1|571616,Poptr1|571618,Poptr1|571599,Poptr1|571609,Poptr1|571600,Poptr1|35709  
0  
Poptr1|558908,Poptr1|582246,Poptr1|558909,Poptr1|109032  
AT1G24030 Poptr1|658625,Poptr1|721062  
Poptr1|560792  
AT4G34440  
AT3G06640,AT3G06620,AT3G06630,AT5G49470,AT1G67890 Poptr1|354024,Poptr1|55332  
AT5G18910 Poptr1|565696,Poptr1|565694  
Poptr1|575218,Poptr1|674509  
Poptr1|102152,Poptr1|65368  
Poptr1|555434  
Poptr1|550520  
Poptr1|107584  
Poptr1|587013,Poptr1|589641  
AT1G70520 Poptr1|566043,Poptr1|583688  
Poptr1|548827,Poptr1|548820,Poptr1|103929,Poptr1|548816,Poptr1|592708  
AT4G18250,AT1G70250 Poptr1|545371  
Poptr1|65379,Poptr1|596193,Poptr1|585091  
AT4G11890Poptr1|597551  
AT4G04960 Poptr1|596011,Poptr1|580912,Poptr1|596012,Poptr1|545294  
AT2G17170 Poptr1|585512  
AT4G00340  
Poptr1|713598,Poptr1|555383,Poptr1|544887,Poptr1|713593,Poptr1|108081,Poptr1|544907,Poptr1|55538  
8,Poptr1|544885,Poptr1|544886,Poptr1|568228  
AT1G26150  
AT3G63260  
Poptr1|590226,Poptr1|747510,Poptr1|595264,Poptr1|581955,Poptr1|581953,Poptr1|702960  
Poptr1|591399  
AT3G16030  
Poptr1|99464  
AT3G49060 Poptr1|356219  
AT2G23200 Poptr1|558910,Poptr1|651093,Poptr1|651121  
AT5G11360Poptr1|577778  
Poptr1|103177  
Poptr1|594876  
Poptr1|583269  
Poptr1|355555

Poptr1|582061,Poptr1|744623  
Poptr1|591859,Poptr1|551896  
AT1G11050Poptr1|552921,Poptr1|552925,Poptr1|552924,Poptr1|546517  
Poptr1|594872,Poptr1|594873,Poptr1|594879,Poptr1|594874,Poptr1|594880,Poptr1|574604,Poptr1|55690  
0,Poptr1|594868  
AT2G29250,AT2G29220 Poptr1|568342  
Poptr1|544940,Poptr1|568367,Poptr1|589634,Poptr1|589640,Poptr1|569016,Poptr1|582034,Poptr1|97854  
AT1G25390 Poptr1|566582,Poptr1|748316,Poptr1|658853,Poptr1|566579  
AT3G09010  
AT4G14780,AT3G22750 Poptr1|342291,Poptr1|52102,Poptr1|345415  
Poptr1|592510,Poptr1|568394,Poptr1|592515  
AT4G20790 Poptr1|569329  
AT1G76370,AT1G20650 Poptr1|73161,Poptr1|550762  
Poptr1|103224  
Poptr1|596408,Poptr1|566156,Poptr1|564909  
AT4G02010 Poptr1|572600,Poptr1|552541  
Poptr1|595080  
Poptr1|588152  
Poptr1|576843,Poptr1|106626,Poptr1|351826  
AT3G46930,AT5G58950 Poptr1|695915,Poptr1|558596  
Poptr1|593690,Poptr1|588617,Poptr1|588615,Poptr1|569035,Poptr1|569037,Poptr1|588611,Poptr1|10467  
7,Poptr1|571438,Poptr1|588618,Poptr1|594131,Poptr1|104309,Poptr1|101170  
AT3G57760  
AT3G16530  
AT5G13160 Poptr1|554734,Poptr1|548061  
Poptr1|582180  
AT5G60900  
Poptr1|103383,Poptr1|343964,Poptr1|579578,Poptr1|592625,Poptr1|672875,Poptr1|547695,Poptr1|54791  
7,Poptr1|107033,Poptr1|583272,Poptr1|101892  
Poptr1|555429  
Poptr1|586369  
AT2G11520Poptr1|578887,Poptr1|583677  
Poptr1|65716,Poptr1|586885,Poptr1|550408,Poptr1|597257,Poptr1|586888,Poptr1|586884,Poptr1|586859,  
Poptr1|100277,Poptr1|586887,Poptr1|65717  
Poptr1|646073,Poptr1|99341  
AT5G38990,AT5G39000 Poptr1|583839,Poptr1|673056,Poptr1|101345,Poptr1|590517  
Poptr1|580847  
Poptr1|678645,Poptr1|741855,Poptr1|107008,Poptr1|594078,Poptr1|102380,Poptr1|55884,Poptr1|693783  
Poptr1|561079  
Poptr1|695396,Poptr1|701572  
AT2G17220 Poptr1|595005  
Poptr1|72013  
AT1G16760,AT1G78940 Poptr1|585615,Poptr1|97984  
Poptr1|547615  
Poptr1|568650  
Poptr1|593724  
AT2G20300 Poptr1|645536,Poptr1|57409  
Poptr1|696273  
AT2G43850,AT3G59830  
AT3G46410  
AT5G03320,AT3G09830 Poptr1|589458  
Poptr1|97843  
AT3G24790  
AT3G26700 Poptr1|684169,Poptr1|732082  
Poptr1|560987,Poptr1|577176  
Poptr1|579197  
AT1G06700,AT2G30740,AT2G30730  
Poptr1|349843  
AT3G58690 Poptr1|572853  
AT1G30570 Poptr1|550622,Poptr1|672184  
Poptr1|545123  
AT5G46570 Poptr1|580104  
AT5G59260,AT5G59270,AT3G46760,AT5G60280,AT3G45440,AT5G60320,AT3G45330,AT3G45410,AT3G45420,AT5  
G60310,AT5G60300,AT3G45430,AT5G60270  
Poptr1|558035,Poptr1|549137,Poptr1|558033,Poptr1|558025,Poptr1|558030,Poptr1|558034,Poptr1|55803  
2,Poptr1|558028  
Poptr1|347193,Poptr1|562039,Poptr1|562038,Poptr1|347194,Poptr1|347195,Poptr1|592667  
Poptr1|342140,Poptr1|103624,Poptr1|715569  
Poptr1|596863  
Poptr1|585581,Poptr1|555155  
Poptr1|102680  
AT5G01850 Poptr1|577161  
Poptr1|52255,Poptr1|342127  
AT4G02410,AT4G02420,AT2G37710,AT3G53810 Poptr1|560798,Poptr1|677145,Poptr1|101621  
Poptr1|597380,Poptr1|578785,Poptr1|597379,Poptr1|738057,Poptr1|590369  
Poptr1|579525  
AT3G59750,AT3G59740,AT3G59700,AT3G59730,AT2G43690,AT2G43700,AT4G29050,AT1G70110,AT1G70130  
Poptr1|62898,Poptr1|555048  
AT1G53060  
AT5G10520,AT5G65530 Poptr1|563288  
Poptr1|576818  
AT1G07460

AT5G50180 Poptr1|49164,Poptr1|58330  
AT2G28250 Poptr1|697739,Poptr1|595081  
Poptr1|575932,Poptr1|667125,Poptr1|596154,Poptr1|107650,Poptr1|576723  
AT3G01300,AT5G15080,AT3G28690  
Poptr1|579821  
Poptr1|589263  
AT2G28930,AT1G07570 Poptr1|558069,Poptr1|549167  
AT1G70530 Poptr1|583687  
Poptr1|347712,Poptr1|591844,Poptr1|357023  
Poptr1|103169,Poptr1|585244,Poptr1|677416,Poptr1|580058,Poptr1|109258,Poptr1|108383,Poptr1|57479  
6,Poptr1|104605,Poptr1|680215  
AT1G55200,AT3G13690 Poptr1|592740  
Poptr1|597239  
AT4G34500 Poptr1|556460,Poptr1|557261  
AT4G23050 Poptr1|554320  
Poptr1|589636  
Poptr1|589538  
Poptr1|103885,Poptr1|597533,Poptr1|105553,Poptr1|106045  
Poptr1|681654  
Poptr1|593567,Poptr1|349842  
Poptr1|106287,Poptr1|579819,Poptr1|656717,Poptr1|568224,Poptr1|748365,Poptr1|593360,Poptr1|59471  
7  
Poptr1|352817  
Poptr1|101582  
AT1G61460,AT1G61420,AT1G61480,AT1G61490,AT1G61500,AT1G61400,AT1G61440,AT1G61430,AT1G61550,AT1  
G61390,AT1G61380,AT1G61360,AT1G11280,AT1G61370  
Poptr1|579192  
AT3G20530 Poptr1|56818  
Poptr1|342368,Poptr1|596287  
Poptr1|705549  
Poptr1|585453  
AT4G13190  
AT5G57035 Poptr1|561040  
Poptr1|747769  
Poptr1|562319,Poptr1|592406  
Poptr1|659779  
AT1G01740  
AT4G35600  
Poptr1|594719  
AT3G17420  
Poptr1|571836  
Poptr1|62827,Poptr1|555117,Poptr1|548696  
AT2G32800 Poptr1|577421,Poptr1|549826  
AT2G39110Poptr1|55607,Poptr1|344890  
Poptr1|550086,Poptr1|585115,Poptr1|550085,Poptr1|549459,Poptr1|104391,Poptr1|108273,Poptr1|56335  
8  
AT2G42630 Poptr1|644969  
AT2G23450 Poptr1|558819,Poptr1|76208  
Poptr1|562314,Poptr1|578992,Poptr1|556896  
AT2G18470 Poptr1|76280,Poptr1|356988  
AT1G52310 Poptr1|702845  
Poptr1|561881  
Poptr1|544779,Poptr1|591351,Poptr1|669917,Poptr1|544895,Poptr1|583908,Poptr1|580820,Poptr1|58969  
3  
AT4G27290  
Poptr1|582052,Poptr1|585444,Poptr1|744629,Poptr1|699125,Poptr1|582053,Poptr1|582044,Poptr1|97864,  
Poptr1|582049,Poptr1|97856,Poptr1|97851,Poptr1|569021,Poptr1|102161,Poptr1|101581,Poptr1|593146,Poptr1|1015  
86,Poptr1|594677,Poptr1|697832,Poptr1|747987,Poptr1|569014  
Poptr1|571840  
Poptr1|594223,Poptr1|582506  
AT3G52530,AT3G57700,AT3G57750  
AT2G07180 Poptr1|351717,Poptr1|584547  
AT1G49270,AT3G18810 Poptr1|557265,Poptr1|556456  
Poptr1|675118  
AT4G35780,AT2G17700 Poptr1|741188,Poptr1|585676  
Poptr1|76501  
AT4G01330 Poptr1|580018  
Poptr1|584228  
AT1G61590 Poptr1|590141,Poptr1|554145  
Poptr1|99584  
AT3G45390 Poptr1|588941  
Poptr1|569304  
AT5G16500,AT3G02810  
AT2G43230,AT3G59350 Poptr1|594474,Poptr1|718385  
Poptr1|596169  
AT3G07070 Poptr1|553153  
AT1G56720 Poptr1|581605  
Poptr1|563939  
AT3G46290,AT5G59700 Poptr1|650315,Poptr1|49039  
AT5G22050 Poptr1|705883,Poptr1|558229  
Poptr1|558458  
AT1G80870 Poptr1|647177

Poptr1|345938,Poptr1|575147  
Poptr1|690514,Poptr1|650982  
AT3G51990 Poptr1|641296,Poptr1|650034  
AT3G55550 Poptr1|576819,Poptr1|353576  
Poptr1|591856,Poptr1|551899  
Poptr1|568341  
Poptr1|588682  
AT5G50000 Poptr1|570074,Poptr1|575140  
AT1G08720 Poptr1|570965  
Poptr1|589638  
Poptr1|563085  
Poptr1|711481  
Poptr1|593792  
AT3G26940  
AT4G02630  
AT5G42120 Poptr1|72567  
Poptr1|574656,Poptr1|650394  
AT1G69730,AT1G79680,AT4G31100,AT4G31110,AT1G19390,AT1G17910,AT1G16120,AT1G16160,AT1G16140,AT1  
G16150,AT1G16130,AT1G79670  
Poptr1|597581  
Poptr1|596814,Poptr1|349397  
Poptr1|582897  
Poptr1|349050,Poptr1|584554  
AT2G24370,AT4G31230 Poptr1|674460,Poptr1|672635,Poptr1|344214  
AT1G70450,AT1G70460,AT1G23540 Poptr1|565194,Poptr1|55061  
Poptr1|589180  
AT4G23140,AT4G23160,AT4G23150,AT4G23230,AT4G23180,AT4G23270,AT4G23280,AT4G23310,AT3G45860,AT4  
G23130,AT4G05200  
Poptr1|588988,Poptr1|555393,Poptr1|555410,Poptr1|586309,Poptr1|544909,Poptr1|587847,Poptr1|54489  
1,Poptr1|544892,Poptr1|555408,Poptr1|544901,Poptr1|568229  
AT3G27560,AT5G40540  
AT1G51940 Poptr1|48907  
AT2G26290 Poptr1|352589  
AT1G34300  
Poptr1|566587  
AT2G41890 Poptr1|560535  
AT5G61350 Poptr1|671334  
Poptr1|571635  
Poptr1|555556,Poptr1|580874  
Poptr1|103577  
Poptr1|354787  
AT3G57640 Poptr1|576243  
AT2G39180 Poptr1|659867  
Poptr1|705320,Poptr1|596191,Poptr1|579196,Poptr1|555435  
AT4G27300  
AT1G28390 Poptr1|694488  
AT5G02290  
AT3G12000  
AT5G24080 Poptr1|345693,Poptr1|580575  
Poptr1|747642,Poptr1|574387,Poptr1|592091,Poptr1|107641  
AT2G19410  
AT1G52290 Poptr1|349569,Poptr1|691266  
AT3G58760  
AT1G65190,AT1G65250,AT1G67470  
Poptr1|567595,Poptr1|353395,Poptr1|589427  
Poptr1|589639  
Poptr1|547712,Poptr1|584073,Poptr1|352242,Poptr1|679844,Poptr1|107935,Poptr1|579725,Poptr1|55561  
5,Poptr1|556683,Poptr1|99234  
AT1G53080  
AT5G18470  
Poptr1|104244  
Poptr1|594897  
AT1G61860 Poptr1|546353,Poptr1|102309,Poptr1|61663  
AT3G24550 Poptr1|737588  
AT3G21630 Poptr1|572994,Poptr1|692191,Poptr1|568081  
Poptr1|568997  
Poptr1|571226,Poptr1|571227  
AT1G07870 Poptr1|706250,Poptr1|723362  
AT3G15356  
Poptr1|103897  
AT1G74490  
AT2G28590  
Poptr1|356327,Poptr1|575732  
AT5G57670 Poptr1|585151,Poptr1|578641  
Poptr1|595222  
AT3G05140 Poptr1|570903  
Poptr1|345640,Poptr1|721159,Poptr1|545761,Poptr1|546623,Poptr1|577579,Poptr1|577575,Poptr1|66851  
5  
AT3G45920  
AT2G17160 Poptr1|597582  
Poptr1|64252  
Poptr1|591139,Poptr1|571598

AT2G39360  
Poptr1|560578,Poptr1|578915  
Poptr1|657760  
Poptr1|589646  
Poptr1|592262,Poptr1|594257  
AT4G23210,AT4G23300,AT4G23190,AT4G23200,AT4G23220,AT4G11530,AT4G11490,AT4G11480,AT4G11470,AT4  
G23240,AT4G23290,AT4G23320,AT4G11460,AT4G23250,AT4G23260  
Poptr1|595976  
AT1G22720 Poptr1|106855  
Poptr1|575929  
AT5G35960 Poptr1|572780  
AT3G15890,AT1G52540  
Poptr1|594434  
AT5G63940  
AT4G00330 Poptr1|644485,Poptr1|731138,Poptr1|723122  
Poptr1|591736,Poptr1|589940  
Poptr1|588985,Poptr1|569002,Poptr1|585511,Poptr1|653859  
AT2G18890 Poptr1|96908,Poptr1|578584  
AT3G57740  
AT2G41970 Poptr1|344449  
Poptr1|568366,Poptr1|568364  
AT1G63500,AT5G41260 Poptr1|693438,Poptr1|683685  
Poptr1|353733  
AT5G28680,AT3G04690 Poptr1|595406,Poptr1|571054  
AT5G65600,AT5G10530 Poptr1|655551,Poptr1|554038,Poptr1|563357  
Poptr1|589691,Poptr1|585716,Poptr1|589689,Poptr1|589687,Poptr1|597556,Poptr1|106362,Poptr1|5808  
9,Poptr1|574929,Poptr1|574924,Poptr1|569802  
AT5G12000,AT5G26150 Poptr1|653860,Poptr1|668741  
Poptr1|680920  
Poptr1|108834  
Poptr1|589568,Poptr1|576755  
AT2G47060,AT3G62220 Poptr1|552601,Poptr1|700369  
AT4G21390 Poptr1|555425,Poptr1|555423,Poptr1|555422,Poptr1|555421,Poptr1|568350  
AT3G17410,AT1G48210,AT1G48220  
AT3G54030  
Poptr1|568355  
AT1G70740 Poptr1|354273  
Poptr1|660232,Poptr1|544802,Poptr1|568023,Poptr1|555318,Poptr1|544799,Poptr1|583716,Poptr1|10669  
3,Poptr1|647558,Poptr1|544798,Poptr1|670217,Poptr1|555315,Poptr1|106771  
Poptr1|344892,Poptr1|567635,Poptr1|353363  
AT1G16670 Poptr1|586879  
Poptr1|574562  
AT1G61610  
AT1G50990  
AT1G21590,AT1G77280 Poptr1|685961,Poptr1|558448,Poptr1|692752,Poptr1|714592  
Poptr1|568773  
AT1G14000 Poptr1|345132  
Poptr1|544944  
AT5G40380 Poptr1|691561  
AT2G30940 Poptr1|545598,Poptr1|678590  
AT3G19300 Poptr1|649575  
AT1G65790,AT1G65800,AT4G21380,AT4G21366,AT4G21370 Poptr1|687503,Poptr1|544938  
AT5G38560 Poptr1|545664,Poptr1|580756,Poptr1|658976  
Poptr1|580674,Poptr1|568233,Poptr1|544921,Poptr1|555411,Poptr1|748508,Poptr1|105790,Poptr1|56839  
8,Poptr1|568232,Poptr1|568244,Poptr1|568235  
Poptr1|72530  
AT3G20200  
Poptr1|75430,Poptr1|672556,Poptr1|75428,Poptr1|594480,Poptr1|355240,Poptr1|355242,Poptr1|579127,  
Poptr1|666163,Poptr1|574791  
Poptr1|568356  
AT1G18390  
AT1G11410,AT1G11340 Poptr1|544941,Poptr1|579199,Poptr1|555424  
AT5G56890 Poptr1|98322,Poptr1|589195,Poptr1|703279  
AT3G01840 Poptr1|65715  
AT2G42960,AT3G59110 Poptr1|692799,Poptr1|72694  
Poptr1|587687,Poptr1|676260  
Poptr1|580279  
Poptr1|109056  
AT4G32000,AT2G25220 Poptr1|737306,Poptr1|717916  
Poptr1|101830  
AT3G09780  
AT2G40270 Poptr1|586828  
AT4G28350  
AT5G56790  
Poptr1|97842  
Poptr1|591121,Poptr1|571837,Poptr1|574564,Poptr1|650232,Poptr1|595265  
Poptr1|588778  
AT5G35380,AT2G07020  
AT3G53840  
Poptr1|581272  
Poptr1|547696  
Poptr1|589642

Poptr1|574930,Poptr1|580017  
AT5G51270,AT4G25160,AT5G61550,AT5G61560  
AT5G24010 Poptr1|648205,Poptr1|678551  
Poptr1|589645  
Poptr1|692395  
AT5G65500  
Poptr1|662800  
Poptr1|584640,Poptr1|657745  
AT5G59010 Poptr1|683813  
Poptr1|596680,Poptr1|578989,Poptr1|578990,Poptr1|560633,Poptr1|578974,Poptr1|578975,Poptr1|59667  
9,Poptr1|596678,Poptr1|578979,Poptr1|578994,Poptr1|578993,Poptr1|560634  
AT1G49730  
AT5G35370 Poptr1|551486  
AT1G16110Poptr1|578211  
AT4G32300 Poptr1|561902  
Poptr1|586668  
Poptr1|569020  
AT2G24620  
Poptr1|102930  
AT4G25390,AT5G51770  
AT5G35580,AT2G05940 Poptr1|589288  
Poptr1|710672,Poptr1|550715  
AT5G42440 Poptr1|551298,Poptr1|559408  
Poptr1|596381  
AT2G19130 Poptr1|571825,Poptr1|663560,Poptr1|574570  
Poptr1|570549,Poptr1|555632  
Poptr1|647655  
AT3G24540  
Poptr1|107313,Poptr1|596382,Poptr1|558027,Poptr1|592624,Poptr1|592622,Poptr1|597493,Poptr1|10712  
7,Poptr1|106033,Poptr1|592623,Poptr1|677964,Poptr1|678643,Poptr1|63014,Poptr1|98518  
AT5G66710 Poptr1|101561  
AT3G59420 Poptr1|562238,Poptr1|59772  
Poptr1|545576,Poptr1|566581  
Poptr1|562270,Poptr1|103221,Poptr1|583015,Poptr1|591213,Poptr1|679010,Poptr1|586549,Poptr1|67738  
7,Poptr1|668293,Poptr1|577277,Poptr1|668292,Poptr1|677386,Poptr1|668295,Poptr1|668290,Poptr1|666858,Poptr1|5  
62124,Poptr1|562127,Poptr1|562355,Poptr1|668291,Poptr1|718169,Poptr1|574794,Poptr1|666165  
AT1G66880,AT5G38210 Poptr1|107453,Poptr1|348885,Poptr1|747165,Poptr1|648047  
AT5G20050  
AT1G67520 Poptr1|105832  
Poptr1|75478  
AT3G21450  
AT2G31800 Poptr1|53042,Poptr1|577280  
Poptr1|584598  
AT4G35030,AT2G16750 Poptr1|546236  
Poptr1|48551,Poptr1|554855  
Poptr1|710059,Poptr1|651183  
AT1G21245 Poptr1|592131  
Poptr1|672561  
Poptr1|681267  
Poptr1|579657  
AT5G01020 Poptr1|734427,Poptr1|702816  
Poptr1|585972  
Poptr1|672171,Poptr1|672172  
Poptr1|595667  
Poptr1|640841  
Poptr1|559856,Poptr1|692986  
AT2G39660,AT3G55450  
AT2G46550,AT1G01240 Poptr1|644599,Poptr1|700299  
AT1G62970  
AT5G09540,AT5G64360 Poptr1|577316,Poptr1|577321,Poptr1|562379  
Poptr1|587897  
AT1G12470 Poptr1|730530  
AT3G56650 Poptr1|344080  
AT4G25170 Poptr1|554165,Poptr1|703001  
Poptr1|703023  
AT5G61490  
AT1G67020  
Poptr1|562676,Poptr1|562673,Poptr1|587299,Poptr1|573420,Poptr1|586394,Poptr1|561109,Poptr1|34986  
3,Poptr1|559087,Poptr1|559088,Poptr1|591230,Poptr1|105630,Poptr1|571696,Poptr1|558356,Poptr1|586937  
Poptr1|109182,Poptr1|98792  
AT5G55570 Poptr1|590261  
Poptr1|58602  
Poptr1|343841,Poptr1|587195  
Poptr1|590971,Poptr1|561999  
AT4G31860,AT2G25070  
AT4G38100 Poptr1|694464  
AT4G01150Poptr1|644547,Poptr1|731247  
AT3G56910 Poptr1|591338,Poptr1|560310,Poptr1|576080  
Poptr1|109233  
AT4G21470 Poptr1|685305,Poptr1|347201  
Poptr1|591972  
AT3G23805,AT4G13950 Poptr1|549784,Poptr1|597073



AT3G05490,AT1G02900  
AT2G33775,AT1G28270 Poptr1|555785,Poptr1|555786  
AT5G67070 Poptr1|716238  
Poptr1|729546,Poptr1|671680,Poptr1|664471  
AT3G16570,AT4G15800 Poptr1|673280  
AT2G38550 Poptr1|734333,Poptr1|717141  
AT1G73740 Poptr1|569791  
AT1G77250 Poptr1|347198,Poptr1|559297  
Poptr1|72180,Poptr1|644362  
AT2G45540  
Poptr1|643950  
Poptr1|644360  
Poptr1|644359,Poptr1|663849,Poptr1|644361,Poptr1|663852,Poptr1|663851  
Poptr1|552072  
Poptr1|644363  
AT3G60920 Poptr1|730921  
AT1G20830 Poptr1|559986,Poptr1|642782  
Poptr1|736485  
AT5G10790 Poptr1|578303,Poptr1|562011  
Poptr1|548169  
AT1G67190 Poptr1|679937  
AT3G61600,AT2G46260 Poptr1|348041,Poptr1|700265  
AT4G01160  
Poptr1|709218,Poptr1|554445  
AT2G21600,AT4G39220 Poptr1|649394,Poptr1|648623,Poptr1|556485  
AT2G18240 Poptr1|694782,Poptr1|643100  
AT2G23310 Poptr1|655092  
AT5G22875 Poptr1|673402  
AT5G01660 Poptr1|577085  
Poptr1|108993  
AT3G11000  
Poptr1|353736  
AT3G07950 Poptr1|655923,Poptr1|659857  
Poptr1|580064,Poptr1|712331,Poptr1|705727,Poptr1|578465  
Poptr1|668951,Poptr1|654039  
AT1G52300,AT3G16080,AT1G15250  
AT4G16695 Poptr1|553883  
Poptr1|676401  
AT2G33585  
Poptr1|652267,Poptr1|678997  
AT3G05680 Poptr1|576494  
Poptr1|568370,Poptr1|713613  
Poptr1|694146  
AT4G36750 Poptr1|563112,Poptr1|741162  
AT5G54500,AT4G27270 Poptr1|569038  
AT5G58800 Poptr1|650149  
Poptr1|550008  
AT1G49980 Poptr1|550009  
Poptr1|693754,Poptr1|585965,Poptr1|590286,Poptr1|61680  
AT2G34040,AT1G29030,AT3G19516 Poptr1|693964,Poptr1|99969  
Poptr1|584181  
AT3G07300 Poptr1|343874,Poptr1|547827  
AT4G15440 Poptr1|688325  
AT5G42650 Poptr1|677770,Poptr1|644172  
Poptr1|671963,Poptr1|556417,Poptr1|556416,Poptr1|593046,Poptr1|582241,Poptr1|557312  
AT5G64230 Poptr1|701755  
AT3G19920  
AT5G17520 Poptr1|730211  
Poptr1|63790  
AT2G25735 Poptr1|578122,Poptr1|585727,Poptr1|352829  
AT5G01740 Poptr1|58233,Poptr1|577106  
Poptr1|574516  
AT3G10985 Poptr1|659435,Poptr1|656319  
AT1G11680 Poptr1|554675,Poptr1|48605  
Poptr1|692422,Poptr1|731009  
AT1G01910  
AT3G47990 Poptr1|733294  
AT4G20760 Poptr1|569326  
AT5G02220 Poptr1|563918,Poptr1|567402,Poptr1|650242,Poptr1|576810  
Poptr1|107242,Poptr1|696282,Poptr1|658004  
AT2G28290 Poptr1|658006  
Poptr1|658007  
Poptr1|656913  
Poptr1|350269,Poptr1|48720  
AT5G63610  
AT4G28980 Poptr1|597231  
AT4G13020 Poptr1|711546  
AT1G18040,AT1G73690  
AT4G36450,AT2G18170 Poptr1|696121,Poptr1|346392  
AT1G76540 Poptr1|694928,Poptr1|684692  
AT3G54180,AT2G38620 Poptr1|577241,Poptr1|591225  
AT3G59790

AT2G42880 Poptr1|72682,Poptr1|684559  
Poptr1|726880,Poptr1|354252  
AT2G01450  
AT3G18040 Poptr1|355504,Poptr1|688447  
AT4G11330  
AT1G01560  
AT5G45430,AT4G19110  
AT2G46070  
AT1G10210,AT1G59580 Poptr1|104536,Poptr1|52174,Poptr1|684630  
AT2G43790 Poptr1|688887,Poptr1|718188  
AT3G45640 Poptr1|49082,Poptr1|697479  
AT1G53510,AT3G14720 Poptr1|704925,Poptr1|684064  
AT1G18150,AT1G73670  
Poptr1|547751,Poptr1|555115,Poptr1|575939,Poptr1|554493  
AT1G07880  
AT4G01370 Poptr1|552199,Poptr1|688162  
AT4G01595  
AT5G19010 Poptr1|696262,Poptr1|725752  
Poptr1|546020  
AT1G49380 Poptr1|722115  
AT4G27595,AT1G65010  
AT4G40020 Poptr1|75692,Poptr1|71608  
AT5G16730,AT3G02930 Poptr1|571421,Poptr1|665371  
AT1G18100 Poptr1|57525  
AT5G03840  
AT4G20370,AT1G65480  
AT2G27550 Poptr1|721288  
AT5G62040  
Poptr1|567173,Poptr1|582519,Poptr1|103812,Poptr1|345078,Poptr1|573457,Poptr1|55440  
AT5G46720 Poptr1|60224  
AT3G02910  
AT4G29170 Poptr1|745189  
AT3G17670 Poptr1|580609  
AT2G15530,AT4G34040 Poptr1|722219,Poptr1|549913  
AT5G52140 Poptr1|76096  
Poptr1|347640  
AT4G00070,AT1G36950,AT5G67120  
Poptr1|347225,Poptr1|559262  
AT5G42940,AT1G45180  
AT3G05170 Poptr1|595560  
Poptr1|712340  
AT1G08940  
AT1G50730 Poptr1|65400  
AT3G12930 Poptr1|642593,Poptr1|727196  
AT5G55540 Poptr1|568530,Poptr1|65450  
Poptr1|568531  
AT4G33090 Poptr1|695112  
Poptr1|703440  
Poptr1|692911  
AT2G06530 Poptr1|681789  
Poptr1|582924  
AT1G03950  
Poptr1|561015  
AT5G44560 Poptr1|691897  
AT3G01340,AT2G30050 Poptr1|345355,Poptr1|575080,Poptr1|726744  
AT4G21820 Poptr1|647584  
AT1G75020 Poptr1|59425,Poptr1|644190  
AT3G18850 Poptr1|557292  
AT3G02790,AT5G16470 Poptr1|702483,Poptr1|742712  
AT4G14970 Poptr1|351293  
AT4G28390 Poptr1|695730,Poptr1|703497  
AT5G17400 Poptr1|345856  
AT5G13490,AT3G08580 Poptr1|683860,Poptr1|722763,Poptr1|554972,Poptr1|547878  
AT5G56450 Poptr1|561644  
AT1G03970,AT5G44080 Poptr1|694626  
AT5G38720  
Poptr1|580741,Poptr1|556184  
Poptr1|582141  
AT1G53580 Poptr1|694666,Poptr1|65623  
AT2G39920 Poptr1|698535  
AT5G51260,AT4G25150 Poptr1|681116  
AT5G24780,AT5G24770  
AT2G38600 Poptr1|653235,Poptr1|734385  
Poptr1|593609,Poptr1|705837  
Poptr1|352101  
AT4G29260,AT4G29270  
AT1G04040,AT5G44020 Poptr1|658058,Poptr1|711542  
Poptr1|566810  
Poptr1|566812  
AT1G56430,AT1G09240,AT5G56080,AT5G04950 Poptr1|581960  
Poptr1|578616,Poptr1|594900  
Poptr1|566809,Poptr1|659072

AT4G21540 Poptr1|568293  
AT3G05070 Poptr1|694006,Poptr1|585887  
AT3G48500 Poptr1|733541  
AT1G76080 Poptr1|550830,Poptr1|652144  
AT3G12955 Poptr1|691934  
AT5G20820  
AT1G17345,AT1G72430 Poptr1|673230,Poptr1|553808  
AT5G03860 Poptr1|570219,Poptr1|57656  
Poptr1|587141  
AT5G11980Poptr1|561631  
Poptr1|561219  
AT3G58550 Poptr1|640030,Poptr1|554786  
AT2G44300,AT2G44290 Poptr1|745430  
AT1G55260 Poptr1|678768,Poptr1|647488,Poptr1|547637  
AT4G02425 Poptr1|552440,Poptr1|572694  
AT4G15417  
AT5G45150  
Poptr1|561566  
Poptr1|348602  
AT3G43920  
AT3G20420 Poptr1|660602  
AT1G01040 Poptr1|552372  
Poptr1|347754,Poptr1|591779  
AT1G02090 Poptr1|747260,Poptr1|553918  
AT5G62630,AT1G74790 Poptr1|575064  
AT5G39970 Poptr1|577557  
AT5G35730  
Poptr1|59756,Poptr1|562310  
AT2G32295  
Poptr1|705166,Poptr1|100831,Poptr1|736382  
AT3G29075  
AT3G03290,AT5G17390 Poptr1|60513  
AT4G13450 Poptr1|565004,Poptr1|54984  
AT1G69080,AT2G03720 Poptr1|55316,Poptr1|564425  
AT3G55360 Poptr1|563899,Poptr1|567433  
Poptr1|696201  
AT5G67590  
Poptr1|347577  
AT4G20350 Poptr1|688092  
AT4G11450Poptr1|548464,Poptr1|343634  
AT1G63520  
AT1G49050 Poptr1|596479  
AT1G77480,AT1G44130 Poptr1|559257,Poptr1|551432  
Poptr1|685159,Poptr1|75668  
Poptr1|673720  
AT4G33490  
Poptr1|576169,Poptr1|652586,Poptr1|711937  
AT5G06839 Poptr1|576288,Poptr1|583626  
AT1G08320 Poptr1|594982  
AT1G58330,AT1G09950  
AT3G12250,AT5G06950,AT5G06960  
Poptr1|564507  
AT1G68640  
AT1G22070,AT1G77920 Poptr1|685273,Poptr1|711000  
AT5G65210,AT5G10030 Poptr1|53207,Poptr1|558594  
AT5G19470,AT5G19460 Poptr1|583989,Poptr1|98946  
Poptr1|579405  
AT3G02320,AT5G15810 Poptr1|556394,Poptr1|583851  
AT5G01610,AT3G08890,AT5G37070 Poptr1|577052,Poptr1|560948  
AT2G03350 Poptr1|724081,Poptr1|656488  
AT2G24830 Poptr1|737411  
AT5G65300 Poptr1|558495,Poptr1|562556  
AT4G33800 Poptr1|65303,Poptr1|557531  
AT1G23270,AT1G31460 Poptr1|590140  
AT1G48140 Poptr1|343163  
AT3G06455,AT4G01000 Poptr1|692359,Poptr1|700288  
AT5G55200,AT4G26780 Poptr1|698963,Poptr1|688468  
AT5G02040 Poptr1|685730  
AT3G11397,AT5G05987 Poptr1|696829,Poptr1|724608  
Poptr1|576841  
AT2G47760 Poptr1|731888  
AT1G52240  
AT5G02010  
AT2G45890  
AT1G79860 Poptr1|548857,Poptr1|349579  
Poptr1|550810,Poptr1|559902  
AT1G31650 Poptr1|702997,Poptr1|350019  
AT3G16130  
AT4G38430 Poptr1|54360,Poptr1|546285  
AT4G13240,AT3G24620,AT5G19560  
AT4G00460,AT1G01700 Poptr1|572255,Poptr1|347975  
Poptr1|107353,Poptr1|104780,Poptr1|659598,Poptr1|656165,Poptr1|659599,Poptr1|560838

AT3G55660,AT5G05940  
AT3G48080,AT3G48090 Poptr1|575094,Poptr1|699443,Poptr1|570033  
AT2G23390 Poptr1|596774  
Poptr1|580569  
AT4G33660 Poptr1|586596,Poptr1|586597,Poptr1|661429  
AT1G04985 Poptr1|682930  
AT3G53270 Poptr1|584801,Poptr1|589061,Poptr1|560574,Poptr1|596165  
AT1G14830 Poptr1|698155  
AT2G44590,AT3G60190  
AT3G61760 Poptr1|342804  
Poptr1|740219,Poptr1|684392,Poptr1|589958  
AT2G14120,AT4G33650 Poptr1|570608,Poptr1|718503  
AT5G42080 Poptr1|712095,Poptr1|691073  
AT5G42770  
AT2G25500,AT5G66550  
Poptr1|730626,Poptr1|76297  
AT3G54110Poptr1|576911,Poptr1|560866  
AT5G58970 Poptr1|691364  
AT4G24570  
AT2G22500  
Poptr1|583335,Poptr1|668325,Poptr1|577345,Poptr1|577323,Poptr1|577322,Poptr1|75548,Poptr1|716414,  
Poptr1|711109  
AT5G09470  
AT5G01340 Poptr1|577001  
AT5G19760 Poptr1|684718,Poptr1|547596  
AT4G03115Poptr1|572760,Poptr1|572764  
AT1G14140 Poptr1|698398  
Poptr1|555733  
Poptr1|554894,Poptr1|587198  
AT1G80890,AT1G16000  
Poptr1|648369  
AT2G42690 Poptr1|349980  
AT2G31690,AT1G05800 Poptr1|664702,Poptr1|348665  
AT1G06250,AT2G31100  
Poptr1|585357  
AT2G44810 Poptr1|342648,Poptr1|677679  
AT2G30550,AT1G06800 Poptr1|559641,Poptr1|342267  
Poptr1|579060,Poptr1|580577,Poptr1|580576,Poptr1|713858  
AT1G51440 Poptr1|650067  
Poptr1|549623  
Poptr1|106352  
Poptr1|591773  
AT4G18550 Poptr1|685115,Poptr1|568737  
AT1G30370 Poptr1|64523,Poptr1|557811  
AT4G16820 Poptr1|589902,Poptr1|553922  
AT1G18190 Poptr1|700856  
AT1G68700,AT1G26140  
AT3G25597 Poptr1|354084  
AT1G31335 Poptr1|341661,Poptr1|63337  
AT4G02610,AT3G54640 Poptr1|643222,Poptr1|651840  
AT5G06070  
AT4G17810  
AT2G37740,AT3G23140  
AT3G53820 Poptr1|560802  
AT3G09290  
AT2G42410 Poptr1|346872,Poptr1|559665  
Poptr1|656132,Poptr1|659644,Poptr1|667900,Poptr1|351811  
AT5G43540 Poptr1|354569  
AT3G23130 Poptr1|564935,Poptr1|55084  
Poptr1|356619  
AT5G65400  
AT4G24380 Poptr1|711115  
Poptr1|583907,Poptr1|351321  
AT3G19650 Poptr1|549999  
AT4G17830 Poptr1|743139,Poptr1|702918  
AT5G25500 Poptr1|561868  
AT1G28490 Poptr1|674303,Poptr1|693959  
Poptr1|554345,Poptr1|548483  
AT5G59890,AT3G46010,AT3G45990,AT3G46000,AT5G59880  
Poptr1|650298,Poptr1|691417,Poptr1|558102,Poptr1|683835,Poptr1|567460,Poptr1|720178  
AT4G25590,AT5G52360 Poptr1|570479,Poptr1|699309  
AT4G00680,AT1G01750  
AT2G16700 Poptr1|648773,Poptr1|649239  
AT4G34970  
AT2G31200 Poptr1|552672,Poptr1|685386,Poptr1|682001  
AT1G22510,AT1G72175 Poptr1|678161,Poptr1|738775  
AT4G33940 Poptr1|581484  
AT1G31910 Poptr1|678245,Poptr1|739979,Poptr1|712033  
AT3G45740 Poptr1|567538,Poptr1|563801  
AT1G31175Poptr1|575615  
AT1G76240 Poptr1|346597  
Poptr1|644348

Poptr1|344571  
Poptr1|663822  
Poptr1|663823  
Poptr1|644347  
AT3G43300 Poptr1|695153  
Poptr1|663824  
AT4G38200,AT4G35380 Poptr1|595030  
AT1G01960,AT3G60860  
Poptr1|644349  
AT3G48110Poptr1|677674  
Poptr1|584590  
Poptr1|677675  
Poptr1|75997,Poptr1|107896  
Poptr1|109268,Poptr1|58838,Poptr1|350171,Poptr1|108003,Poptr1|65730,Poptr1|106625,Poptr1|56626,P  
optr1|71913,Poptr1|105598,Poptr1|354373,Poptr1|357179  
Poptr1|565233,Poptr1|106499,Poptr1|573869  
Poptr1|60304,Poptr1|101531,Poptr1|101513,Poptr1|49093,Poptr1|53274,Poptr1|104810,Poptr1|100776,P  
optr1|106961,Poptr1|98978,Poptr1|62270,Poptr1|644949,Poptr1|648362,Poptr1|657427  
Poptr1|560086,Poptr1|106676,Poptr1|577997  
Poptr1|75908,Poptr1|98016,Poptr1|102986,Poptr1|104084,Poptr1|105724,Poptr1|101544,Poptr1|62165,P  
optr1|108706,Poptr1|103394,Poptr1|107028,Poptr1|105482,Poptr1|104058,Poptr1|104015,Poptr1|349348,Poptr1|608  
62,Poptr1|108320,Poptr1|107152,Poptr1|106594,Poptr1|108738,Poptr1|107928,Poptr1|345619,Poptr1|106419,Poptr1|  
342545,Poptr1|107975,Poptr1|58131,Poptr1|102475,Poptr1|105784  
Poptr1|55979  
Poptr1|59503  
Poptr1|100747  
Poptr1|97606,Poptr1|98900,Poptr1|559374,Poptr1|105452,Poptr1|108446  
Poptr1|108656,Poptr1|102204  
Poptr1|570993  
Poptr1|651765  
AT3G21215 Poptr1|344823,Poptr1|567817  
AT2G42245 Poptr1|651101  
AT3G13700 Poptr1|703271  
AT2G42240  
Poptr1|651100,Poptr1|655110  
Poptr1|109297  
AT5G27470 Poptr1|562832,Poptr1|694377  
AT1G11870  
Poptr1|72288  
Poptr1|597607  
Poptr1|692641  
AT3G10405 Poptr1|567664,Poptr1|353341  
AT4G30950 Poptr1|578752,Poptr1|352328  
AT4G04480,AT4G22030  
Poptr1|101165,Poptr1|101160,Poptr1|99314,Poptr1|588580,Poptr1|99315,Poptr1|588588,Poptr1|579087,P  
optr1|101161,Poptr1|99316,Poptr1|568050,Poptr1|568051,Poptr1|588589,Poptr1|579088  
Poptr1|99313,Poptr1|101159,Poptr1|584689,Poptr1|588586  
AT3G04780 Poptr1|703632,Poptr1|662905  
AT1G56220 Poptr1|570775,Poptr1|671703  
AT2G13840 Poptr1|63908  
AT1G73720 Poptr1|550563,Poptr1|699230  
AT2G39800,AT3G55610 Poptr1|686471,Poptr1|724615  
AT4G32470  
AT5G25450 Poptr1|584504,Poptr1|654109  
Poptr1|570678  
Poptr1|59509  
AT2G37280,AT3G53480  
Poptr1|557928  
Poptr1|708621  
Poptr1|554848  
Poptr1|103651  
AT1G53270 Poptr1|60793  
AT1G15520  
Poptr1|547952,Poptr1|547951,Poptr1|708617,Poptr1|554847,Poptr1|350692,Poptr1|350695,Poptr1|54863  
6,Poptr1|554891,Poptr1|352867,Poptr1|58533  
AT5G52860,AT4G25750 Poptr1|96949  
AT5G13580 Poptr1|353473  
Poptr1|76500,Poptr1|569718,Poptr1|660190  
Poptr1|592247,Poptr1|350696  
AT3G52310  
AT2G29940 Poptr1|64269  
AT4G15215,AT4G15230,AT4G15233,AT4G15236  
Poptr1|732773,Poptr1|101934,Poptr1|55360,Poptr1|564329,Poptr1|353959  
AT2G39350,AT3G55090  
Poptr1|108676  
AT2G37010  
Poptr1|584452  
AT5G60740 Poptr1|554752  
AT1G71960 Poptr1|592248,Poptr1|59011  
AT1G31770 Poptr1|349409,Poptr1|596872  
AT2G26910 Poptr1|702112  
Poptr1|353358

AT5G06530 Poptr1|685664,Poptr1|688740  
Poptr1|568593  
AT3G25620 Poptr1|566694  
AT3G53510,AT2G37360 Poptr1|552145,Poptr1|572217,Poptr1|653758  
Poptr1|353963  
AT2G01320 Poptr1|566522  
AT1G15210,AT1G59870  
AT3G13220 Poptr1|568594,Poptr1|49407  
AT4G27420 Poptr1|579505,Poptr1|568943  
AT2G13610 Poptr1|654661,Poptr1|650613  
Poptr1|63052  
Poptr1|349530  
AT5G19410 Poptr1|106340  
AT3G16340 Poptr1|693676,Poptr1|705805  
AT3G55130,AT3G55110,AT3G55100  
Poptr1|348412,Poptr1|348414,Poptr1|595251  
Poptr1|581554  
Poptr1|342949  
AT1G53390 Poptr1|698676  
AT3G30842  
AT2G36380,AT1G66950 Poptr1|589576,Poptr1|353281  
AT1G20700,AT1G20710  
Poptr1|550759,Poptr1|652233  
AT4G35550 Poptr1|650992  
AT3G56140,AT2G40400 Poptr1|353737  
AT3G60810 Poptr1|711144  
AT5G61670 Poptr1|588169  
AT5G06130 Poptr1|344540  
AT3G57220,AT2G41490 Poptr1|560449,Poptr1|576224  
AT2G39020,AT2G39030 Poptr1|567633,Poptr1|720703,Poptr1|353365  
Poptr1|675200  
Poptr1|597081  
AT3G18790  
AT3G52540,AT2G36050,AT3G52550  
Poptr1|667635,Poptr1|352453  
AT5G04820 Poptr1|567905,Poptr1|563547  
AT1G05894,AT2G31480 Poptr1|75418  
AT5G03890,AT3G10120 Poptr1|576595,Poptr1|653738  
Poptr1|650799  
Poptr1|558608,Poptr1|562690  
AT3G07700 Poptr1|57350  
AT5G64940 Poptr1|578543,Poptr1|650797  
AT1G65950  
AT3G19370 Poptr1|549920,Poptr1|557407  
AT2G29530 Poptr1|706076,Poptr1|650203  
AT3G30540,AT3G10900,AT3G10890  
AT1G02310 Poptr1|552401  
AT2G20680,AT4G28320 Poptr1|672273  
AT5G66460 Poptr1|655340,Poptr1|593912  
Poptr1|651956  
AT5G01930 Poptr1|577200,Poptr1|352004  
Poptr1|346792,Poptr1|592385  
Poptr1|575960,Poptr1|344002  
AT1G50300 Poptr1|724203,Poptr1|564190  
AT3G11150 Poptr1|353690  
AT1G11020 Poptr1|61343,Poptr1|344403  
AT1G50440 Poptr1|655647,Poptr1|660035  
AT2G22120  
Poptr1|51741,Poptr1|686000  
Poptr1|652863,Poptr1|702342  
AT2G19260 Poptr1|98465  
AT5G01280,AT3G09000,AT2G38160  
AT2G40070 Poptr1|353660  
AT1G03760 Poptr1|671955,Poptr1|594660  
AT5G47660 Poptr1|560102,Poptr1|575877  
Poptr1|585937,Poptr1|549871  
AT1G76890  
AT1G33240 Poptr1|65825,Poptr1|727247  
Poptr1|72590,Poptr1|692786  
Poptr1|577994,Poptr1|577988,Poptr1|561592  
AT3G10000,AT5G03680 Poptr1|660195,Poptr1|655813  
AT1G76880 Poptr1|72589,Poptr1|551322  
AT5G28300 Poptr1|571019  
AT1G71697,AT4G09760 Poptr1|347084,Poptr1|559425  
AT2G26830 Poptr1|739609  
AT1G74320 Poptr1|48492,Poptr1|555089  
Poptr1|692079  
AT2G46650  
Poptr1|683057,Poptr1|691705  
Poptr1|689598  
AT1G26340 Poptr1|659196  
AT5G53560

Poptr1|574693,Poptr1|569641,Poptr1|568671,Poptr1|556495,Poptr1|570916,Poptr1|573106,Poptr1|56351  
1  
AT2G32720  
AT1G60660 Poptr1|669396  
AT5G48810  
AT1G33055 Poptr1|569244,Poptr1|550485  
AT1G17890,AT1G73250 Poptr1|561376  
AT1G54590,AT1G03140 Poptr1|559562  
AT2G32100,AT1G05420  
AT4G14860 Poptr1|354485,Poptr1|566240,Poptr1|346965  
AT5G50375 Poptr1|733579  
AT5G53400,AT4G27890 Poptr1|355281,Poptr1|732901  
Poptr1|343510,Poptr1|590103  
Poptr1|594044  
Poptr1|702674  
AT3G22550 Poptr1|551155,Poptr1|559572,Poptr1|597513,Poptr1|566225,Poptr1|550149,Poptr1|586054  
AT3G63210  
Poptr1|678921  
AT3G03305 Poptr1|567187,Poptr1|564112  
AT1G30845 Poptr1|652021  
AT4G13040  
Poptr1|553203  
AT1G59840  
Poptr1|589698,Poptr1|589697,Poptr1|719824  
AT4G27110,AT3G20580 Poptr1|571499  
AT3G16860,AT4G16120,AT5G49270 Poptr1|572655,Poptr1|697771  
AT1G53710 Poptr1|676351  
AT2G39080 Poptr1|721040  
AT5G66055 Poptr1|704963,Poptr1|741191  
AT5G40160 Poptr1|65277,Poptr1|584852  
AT5G26760 Poptr1|666112  
AT1G01930 Poptr1|692428  
AT3G10400  
AT5G18810 Poptr1|354880,Poptr1|697853  
Poptr1|555216,Poptr1|547618  
AT3G13570,AT1G55310 Poptr1|701409  
AT3G55460 Poptr1|55533,Poptr1|353561  
AT4G36290,AT4G36280,AT4G36270 Poptr1|703398  
Poptr1|554737  
AT1G19100  
Poptr1|666497,Poptr1|570162,Poptr1|666498  
Poptr1|570163  
Poptr1|662065  
AT5G13130  
AT4G24970,AT5G50780 Poptr1|733700,Poptr1|699358  
Poptr1|582319,Poptr1|652329  
AT5G56060,AT5G25030,AT5G56075  
AT1G55790,AT1G55800  
Poptr1|582563,Poptr1|349973,Poptr1|569163,Poptr1|674742,Poptr1|569165,Poptr1|569164,Poptr1|56916  
6,Poptr1|586881  
AT3G56840  
Poptr1|579810,Poptr1|695627  
AT5G35338,AT5G35330 Poptr1|673519,Poptr1|560687  
AT5G66290 Poptr1|703387,Poptr1|719706  
AT5G13470 Poptr1|587822,Poptr1|693183  
AT5G57020 Poptr1|561044,Poptr1|582937  
AT2G44175 Poptr1|585241  
AT1G06570 Poptr1|559505,Poptr1|551224  
AT2G39450 Poptr1|698612,Poptr1|563840  
AT3G58060  
AT1G16310,AT1G79520 Poptr1|567090  
Poptr1|567086,Poptr1|353812  
Poptr1|102372,Poptr1|62741,Poptr1|351047,Poptr1|594031,Poptr1|690821,Poptr1|62739  
AT4G25890,AT5G57290  
Poptr1|686877  
AT1G51915,AT1G51920 Poptr1|553650,Poptr1|645871  
AT5G37480 Poptr1|663154  
AT4G26900 Poptr1|722769  
Poptr1|641366  
AT3G57440 Poptr1|597774,Poptr1|560504  
Poptr1|552648  
Poptr1|568709  
AT2G42620  
AT1G60600 Poptr1|595727,Poptr1|668354  
AT2G19430 Poptr1|579839,Poptr1|696210  
Poptr1|569775,Poptr1|345817  
Poptr1|694100  
Poptr1|356016,Poptr1|355746  
AT1G54610 Poptr1|570939,Poptr1|742135,Poptr1|345610  
AT1G67580 Poptr1|687029,Poptr1|686205,Poptr1|687816  
AT5G50860 Poptr1|356110,Poptr1|575427  
AT5G63370

AT3G01085,AT5G39420 Poptr1|577691  
Poptr1|559412,Poptr1|551295  
AT1G09600,AT1G57700 Poptr1|596761,Poptr1|60869  
Poptr1|742987  
AT3G48750 Poptr1|579704,Poptr1|576891  
AT5G44290,AT1G03740,AT4G22940  
AT1G53050 Poptr1|728389  
AT1G18670,AT1G74330 Poptr1|581389,Poptr1|345883  
Poptr1|654918  
Poptr1|702820  
AT3G05050 Poptr1|640317,Poptr1|350378  
AT1G71530 Poptr1|558644  
AT1G20930 Poptr1|699588,Poptr1|717304  
Poptr1|744986  
AT1G66750 Poptr1|576894  
AT4G10010,AT1G33770 Poptr1|592364,Poptr1|58979  
AT5G10270,AT5G64960  
AT1G28310  
AT1G64620 Poptr1|651157,Poptr1|646238  
AT5G65590  
AT2G28810,AT1G07640  
AT1G26790,AT1G69570  
AT2G34140,AT1G29160 Poptr1|555679,Poptr1|660784  
AT2G46590,AT3G61850 Poptr1|348108,Poptr1|664142  
AT3G55370  
AT3G21270,AT1G51700  
AT1G47655 Poptr1|709866,Poptr1|740286  
AT5G39660  
AT4G00940  
AT5G62430,AT3G47500 Poptr1|567032,Poptr1|345118,Poptr1|694115,Poptr1|701841  
AT5G66940,AT3G50410 Poptr1|51831,Poptr1|563045  
Poptr1|558834,Poptr1|76167  
AT5G62940 Poptr1|575167,Poptr1|570095  
AT3G52440 Poptr1|653391  
AT4G38000  
Poptr1|678455  
Poptr1|700777,Poptr1|661556  
Poptr1|545281,Poptr1|580922  
Poptr1|647744,Poptr1|660390  
AT5G02460,AT2G37590 Poptr1|696863,Poptr1|675622,Poptr1|560751,Poptr1|64403,Poptr1|723300  
Poptr1|580923  
AT4G21030,AT4G21050,AT4G21080,AT4G21040  
AT4G24060 Poptr1|712091,Poptr1|63376  
AT3G45610,AT5G60200,AT2G28510  
AT1G21340 Poptr1|643508,Poptr1|559345  
AT5G60850 Poptr1|574876,Poptr1|569900  
Poptr1|571281,Poptr1|573985  
AT2G43110Poptr1|732183  
AT5G39050 Poptr1|569152  
AT5G61160,AT3G29680,AT3G29635,AT3G29720,AT3G29670,AT3G29590  
AT5G39090,AT5G39080  
Poptr1|104938  
Poptr1|104803,Poptr1|58424,Poptr1|579415,Poptr1|583066,Poptr1|583074,Poptr1|554817,Poptr1|103910,  
Poptr1|98393  
AT1G03940 Poptr1|593183,Poptr1|574582  
AT3G29690 Poptr1|594195  
AT3G29636 Poptr1|589779,Poptr1|550517,Poptr1|589817,Poptr1|101509,Poptr1|556210,Poptr1|586778,Poptr1|59298  
4,Poptr1|99312,Poptr1|588725,Poptr1|55546  
Poptr1|556311,Poptr1|545650,Poptr1|596649,Poptr1|558190,Poptr1|555881,Poptr1|555879,Poptr1|55588  
0,Poptr1|594680,Poptr1|685090  
Poptr1|579004,Poptr1|560645  
AT1G44890  
AT5G62050 Poptr1|63427  
AT2G46455,AT2G46470  
AT1G20410 Poptr1|559906  
AT1G34010  
AT1G22790 Poptr1|643442,Poptr1|559415  
AT4G11300,AT4G23530,AT1G63930 Poptr1|63499,Poptr1|554411  
AT1G18740,AT1G43630,AT1G74450 Poptr1|710776,Poptr1|714739  
Poptr1|588845  
AT1G22940 Poptr1|343239  
AT5G58280  
Poptr1|71994,Poptr1|696035,Poptr1|76250,Poptr1|557372,Poptr1|579013,Poptr1|593970,Poptr1|581505,  
Poptr1|557371  
AT5G42700 Poptr1|740362,Poptr1|672233  
Poptr1|557373,Poptr1|557374



AT3G19184  
Poptr1|581504  
AT1G16900 Poptr1|583031,Poptr1|728319  
AT2G04650  
AT1G74910 Poptr1|570040,Poptr1|700899  
AT3G51180,AT5G66270 Poptr1|563267,Poptr1|593864  
AT1G19860  
AT4G13430 Poptr1|590975  
Poptr1|697900  
Poptr1|345471  
AT1G58643,AT1G58936,AT1G59312,AT1G59171,AT1G22100 Poptr1|692931,Poptr1|685407  
AT5G42810  
AT1G55920,AT3G13110 Poptr1|707642  
Poptr1|595652  
AT5G56760 Poptr1|701205,Poptr1|592270  
AT2G17640,AT4G35640 Poptr1|568698,Poptr1|694390  
AT5G01450 Poptr1|560911,Poptr1|735835,Poptr1|64257  
AT2G38220,AT2G38185  
Poptr1|587049  
Poptr1|592022,Poptr1|592027  
AT3G03460,AT5G17510 Poptr1|574012,Poptr1|56774  
AT3G06150,AT5G19060 Poptr1|354936,Poptr1|565326,Poptr1|54927  
AT4G23010  
AT1G12600 Poptr1|350162,Poptr1|691165,Poptr1|700195  
AT5G22280,AT3G44280 Poptr1|703552  
AT5G06265 Poptr1|583780,Poptr1|561442,Poptr1|576539  
AT5G51330 Poptr1|554158,Poptr1|676689  
AT1G10070 Poptr1|710539  
Poptr1|551738  
Poptr1|103486  
AT3G49680,AT5G65780 Poptr1|76469  
Poptr1|577031  
AT1G50110,AT1G50090,AT3G19710 Poptr1|722470  
AT1G10060  
AT5G17460 Poptr1|545417  
Poptr1|350558,Poptr1|63192  
AT5G23680,AT3G48800 Poptr1|356117,Poptr1|666739  
AT2G27020 Poptr1|548687,Poptr1|558179  
AT3G22110Poptr1|717587,Poptr1|575966  
Poptr1|559341,Poptr1|559340  
AT1G78780 Poptr1|746446,Poptr1|568796,Poptr1|746444,Poptr1|585766,Poptr1|746445,Poptr1|680472  
AT5G51795,AT1G55460 Poptr1|719835,Poptr1|567434,Poptr1|101234  
AT1G06110Poptr1|106136,Poptr1|594546,Poptr1|682307  
AT2G33740 Poptr1|643847  
Poptr1|349899  
AT5G27740 Poptr1|689255  
AT5G27380 Poptr1|59979,Poptr1|570889  
Poptr1|105072  
AT5G59750 Poptr1|691426  
AT5G64300 Poptr1|691717  
AT2G22450 Poptr1|71599,Poptr1|562552  
AT5G20830,AT3G43190 Poptr1|589341,Poptr1|736740  
AT5G37180 Poptr1|556032,Poptr1|592812  
AT5G49190  
Poptr1|587744,Poptr1|644849  
AT4G02280 Poptr1|692288  
Poptr1|565553,Poptr1|104465  
AT1G73370 Poptr1|569421,Poptr1|743479  
AT1G69120,AT1G26310 Poptr1|656552,Poptr1|659188  
Poptr1|562326,Poptr1|71791,Poptr1|580449,Poptr1|587046  
AT4G11880,AT4G22950 Poptr1|640573,Poptr1|646538  
AT5G23260 Poptr1|562801  
AT5G20240 Poptr1|651468,Poptr1|709903  
Poptr1|745710,Poptr1|556370  
Poptr1|591593  
AT2G24840 Poptr1|567585,Poptr1|353402  
AT3G57230 Poptr1|643926,Poptr1|51893  
AT5G51860,AT5G51870  
Poptr1|656551  
AT1G17310,AT1G72350  
Poptr1|562385,Poptr1|562386,Poptr1|75542  
AT4G09960 Poptr1|574215,Poptr1|740758  
AT5G65050,AT5G65060,AT1G77080,AT5G65080,AT5G65070,AT5G10140  
AT2G22540 Poptr1|719774  
AT2G45660 Poptr1|730946,Poptr1|644372  
Poptr1|347503  
AT1G31140  
AT3G66656,AT2G34440 Poptr1|546588  
AT2G22630,AT4G37940  
AT1G65360,AT1G01530,AT5G60440,AT4G36590  
Poptr1|56988  
Poptr1|562377

Poptr1|356077,Poptr1|575376  
 AT4G18960 Poptr1|546404,Poptr1|568491  
 Poptr1|562378  
 AT2G14210 Poptr1|54583,Poptr1|65369,Poptr1|642184  
 Poptr1|564322  
 AT2G26320  
 AT4G24540  
 AT2G42830,AT3G58780  
 AT5G62165 Poptr1|570532  
 AT2G03710  
 AT3G30260  
 Poptr1|356323,Poptr1|575735  
 AT3G57390 Poptr1|344137  
 AT1G24260 Poptr1|640054,Poptr1|647036  
 Poptr1|63147  
 AT3G61120,AT2G45650  
 AT3G02310,AT5G15800 Poptr1|583854,Poptr1|648506  
 Poptr1|577315,Poptr1|577312,Poptr1|75533,Poptr1|654587  
 AT1G71692 Poptr1|58984,Poptr1|592338  
 AT5G13790 Poptr1|650029  
 AT5G46320,AT1G47760  
 AT5G60910 Poptr1|661810  
 Poptr1|580430,Poptr1|576996,Poptr1|596142,Poptr1|591433,Poptr1|594443,Poptr1|584741,Poptr1|34707  
 0  
 AT3G54340 Poptr1|342197  
 Poptr1|651191,Poptr1|643871  
 Poptr1|647042,Poptr1|75532,Poptr1|678367,Poptr1|595247,Poptr1|647039,Poptr1|680171,Poptr1|640053  
 Poptr1|575648,Poptr1|570606  
 Poptr1|686107,Poptr1|593885  
 AT3G04100 Poptr1|557926,Poptr1|64263,Poptr1|556246  
 AT3G07120  
 Poptr1|552733,Poptr1|593559,Poptr1|573015  
 AT1G62370  
 AT4G13100,AT3G25030 Poptr1|645432  
 AT4G03965,AT4G22250 Poptr1|99359  
 AT4G18540 Poptr1|108346,Poptr1|545207,Poptr1|545206,Poptr1|568738  
 AT1G51730 Poptr1|640963,Poptr1|683316  
 Poptr1|545782,Poptr1|577549  
 AT5G16310  
 AT1G65650  
 AT3G27240,AT5G40810 Poptr1|721295,Poptr1|48092  
 AT1G05970 Poptr1|594514  
 AT1G20430 Poptr1|550806,Poptr1|652175  
 AT3G03680 Poptr1|571278,Poptr1|571279  
 AT3G61300,AT4G00700  
 AT1G04150 Poptr1|343196  
 AT5G17980 Poptr1|587080,Poptr1|561956,Poptr1|56700  
 AT5G06850 Poptr1|98716,Poptr1|667399,Poptr1|641406  
 AT1G22610 Poptr1|592286,Poptr1|738797  
 Poptr1|552158,Poptr1|731078  
 AT1G51570,AT3G57880 Poptr1|734933,Poptr1|583627  
 Poptr1|595975,Poptr1|580928,Poptr1|580899,Poptr1|546461,Poptr1|344815  
 AT5G48060  
 AT5G44760,AT4G20080  
 AT4G11610Poptr1|554351,Poptr1|63554  
 AT1G74720 Poptr1|58183,Poptr1|351896  
 AT5G12970 Poptr1|639904  
 AT5G03435,AT3G61720  
 Poptr1|562438,Poptr1|562436  
 Poptr1|108756  
 Poptr1|597317,Poptr1|689200,Poptr1|738553,Poptr1|573996  
 Poptr1|57407  
 Poptr1|654576  
 AT1G77120  
 Poptr1|643524  
 AT1G32780 Poptr1|102610,Poptr1|56071,Poptr1|65763  
 AT5G42250 Poptr1|693015  
 AT5G43940 Poptr1|645542  
 AT5G24760 Poptr1|694004  
 AT1G64710  
 Poptr1|589254,Poptr1|562439  
 AT5G63620 Poptr1|97949,Poptr1|58846  
 AT1G22430,AT4G22110,AT1G22440  
 Poptr1|562441,Poptr1|718553,Poptr1|718549,Poptr1|558388,Poptr1|558390,Poptr1|595361  
 Poptr1|595360  
 AT5G14520 Poptr1|577701,Poptr1|579669,Poptr1|712790  
 AT1G48270 Poptr1|721070  
 AT3G58990,AT2G43100,AT2G43090 Poptr1|712500  
 AT3G03210 Poptr1|545543,Poptr1|678526  
 AT4G20930 Poptr1|550610  
 AT5G10810  
 Poptr1|737390,Poptr1|717161

AT3G06210,AT5G18980 Poptr1|345590,Poptr1|565667  
AT4G14280  
AT3G22210 Poptr1|560237  
AT5G22350 Poptr1|556843,Poptr1|594930  
AT5G06180 Poptr1|701468  
AT3G07370 Poptr1|684144  
AT3G12150 Poptr1|667402,Poptr1|745588  
Poptr1|548180  
AT3G02770,AT5G16450  
AT5G56260 Poptr1|744843  
AT1G18560 Poptr1|355594  
Poptr1|673686  
Poptr1|584802,Poptr1|101350,Poptr1|578907,Poptr1|578909,Poptr1|578908  
Poptr1|596968,Poptr1|738639  
Poptr1|583562  
AT5G04140 Poptr1|734780,Poptr1|695596  
AT2G41220  
Poptr1|590208  
AT5G53460 Poptr1|594762,Poptr1|700801  
Poptr1|590800,Poptr1|593753  
AT2G39000 Poptr1|696954,Poptr1|724989  
AT2G33840,AT1G28350 Poptr1|594289,Poptr1|725335,Poptr1|353168  
AT5G17620 Poptr1|689262,Poptr1|663223  
AT4G00560 Poptr1|572209  
AT3G58390,AT4G27650 Poptr1|569355,Poptr1|674081,Poptr1|546489,Poptr1|714881  
AT2G12550 Poptr1|98739,Poptr1|689175  
AT5G67390 Poptr1|558930,Poptr1|349811  
AT2G25340,AT4G32150 Poptr1|352944,Poptr1|737243  
AT4G15780  
AT3G54300 Poptr1|725415,Poptr1|682461  
Poptr1|683577,Poptr1|554835  
AT5G11150  
AT5G22360 Poptr1|650388,Poptr1|705913  
AT3G24890  
AT2G32670,AT1G04760,AT2G33110,AT2G33120,AT1G04750  
Poptr1|733907,Poptr1|746680,Poptr1|684161  
Poptr1|578902  
AT2G27680  
Poptr1|594812  
Poptr1|649116  
AT5G05680 Poptr1|564014,Poptr1|564010,Poptr1|564013  
Poptr1|723020,Poptr1|705990  
AT4G13800,AT3G23870 Poptr1|65062  
Poptr1|641989,Poptr1|703975  
AT2G21120,AT4G38730 Poptr1|713225  
AT4G09640,AT1G34470,AT1G71900 Poptr1|574289,Poptr1|592226  
AT3G56810 Poptr1|576060,Poptr1|351318  
AT2G46375,AT3G61660 Poptr1|552251,Poptr1|664087  
AT3G03140 Poptr1|665376,Poptr1|596939,Poptr1|665377  
AT3G15820,AT3G15830 Poptr1|593271,Poptr1|48873  
AT5G66740 Poptr1|53366  
Poptr1|592037  
AT5G06610 Poptr1|667523,Poptr1|653449  
AT1G79420 Poptr1|720561,Poptr1|567108  
AT5G05840 Poptr1|724572,Poptr1|563964  
AT3G55720  
AT1G49840,AT3G19540 Poptr1|722360,Poptr1|549972  
AT1G27690  
AT1G75160 Poptr1|553357,Poptr1|597191  
AT4G18390 Poptr1|570367,Poptr1|555595,Poptr1|568415  
AT3G02150  
AT5G08070,AT5G60970 Poptr1|680833,Poptr1|556378  
AT1G30210  
AT2G17630,AT4G35630 Poptr1|558766  
AT1G55320 Poptr1|708301  
AT5G23050 Poptr1|582476,Poptr1|742420  
Poptr1|708296  
AT5G02080,AT1G12350 Poptr1|72390,Poptr1|710235  
AT4G23100 Poptr1|709341,Poptr1|682050,Poptr1|584196  
AT5G41120,AT5G41130,AT3G26820,AT3G26840 Poptr1|65010,Poptr1|65012,Poptr1|65007  
Poptr1|570951,Poptr1|570948,Poptr1|65009,Poptr1|570950,Poptr1|595484  
AT3G02030  
AT1G54570 Poptr1|570949,Poptr1|570954,Poptr1|595487,Poptr1|703653,Poptr1|103414,Poptr1|570952  
AT2G39980 Poptr1|567307,Poptr1|563985  
AT5G01210 Poptr1|576934,Poptr1|560885  
Poptr1|587255,Poptr1|553688,Poptr1|705470  
AT5G23940 Poptr1|570420,Poptr1|570424,Poptr1|688629  
Poptr1|108593  
Poptr1|591983,Poptr1|591982  
Poptr1|595393  
AT3G50280,AT3G50300,AT5G38130,AT3G50270,AT5G67150,AT5G67160  
AT5G07860,AT5G07870,AT5G07850,AT5G42830

Poptr1|581329,Poptr1|595930,Poptr1|568839  
Poptr1|100974  
Poptr1|645152,Poptr1|348711,Poptr1|103375,Poptr1|348750,Poptr1|348748,Poptr1|552881,Poptr1|58819  
1,Poptr1|552863,Poptr1|705525,Poptr1|348707,Poptr1|348698,Poptr1|552884,Poptr1|552882,Poptr1|552860,Poptr1|6  
45150,Poptr1|106951,Poptr1|597519,Poptr1|552976,Poptr1|552978,Poptr1|552971,Poptr1|681728,Poptr1|343097  
AT1G10920  
Poptr1|679427,Poptr1|549272  
Poptr1|357190  
Poptr1|555000,Poptr1|674041,Poptr1|547778  
Poptr1|349315  
Poptr1|562060,Poptr1|583118,Poptr1|562056,Poptr1|98448,Poptr1|583134  
Poptr1|645301  
Poptr1|101270  
Poptr1|594638,Poptr1|705237,Poptr1|747319,Poptr1|562169  
Poptr1|580722  
Poptr1|106569  
Poptr1|579740  
AT3G07040  
Poptr1|578339,Poptr1|581659,Poptr1|588244,Poptr1|592671,Poptr1|588236,Poptr1|583412,Poptr1|59007  
7,Poptr1|590084,Poptr1|349952,Poptr1|349951,Poptr1|104819,Poptr1|590083,Poptr1|590079,Poptr1|590080,Poptr1|1  
02574,Poptr1|595586,Poptr1|102576,Poptr1|595584,Poptr1|672173,Poptr1|555196,Poptr1|348512  
Poptr1|590400  
Poptr1|589703,Poptr1|349953  
Poptr1|357189  
AT3G14460  
Poptr1|581641,Poptr1|350841,Poptr1|547802,Poptr1|647269,Poptr1|553710,Poptr1|350849,Poptr1|10148  
0,Poptr1|647281,Poptr1|676846,Poptr1|585136,Poptr1|547833,Poptr1|549271,Poptr1|549273  
Poptr1|570118  
Poptr1|348770  
Poptr1|589727  
Poptr1|555197,Poptr1|663680,Poptr1|592518,Poptr1|64508,Poptr1|353086,Poptr1|552974,Poptr1|745715,  
Poptr1|592896,Poptr1|552972,Poptr1|75884,Poptr1|583984  
Poptr1|356415  
Poptr1|101611  
Poptr1|680084  
Poptr1|354789  
Poptr1|98409  
Poptr1|594255  
Poptr1|584409  
Poptr1|104809  
Poptr1|573944  
Poptr1|594724  
Poptr1|570636  
Poptr1|581653  
Poptr1|557585  
Poptr1|100753,Poptr1|587929,Poptr1|591367,Poptr1|356413,Poptr1|356411,Poptr1|570635,Poptr1|59136  
2,Poptr1|570629,Poptr1|591361,Poptr1|579160,Poptr1|100754,Poptr1|587932,Poptr1|587934,Poptr1|587936,Poptr1|5  
75618  
Poptr1|587930  
Poptr1|587931  
Poptr1|592903,Poptr1|596321  
Poptr1|592885  
Poptr1|106568  
Poptr1|590692  
Poptr1|102651  
Poptr1|641861  
AT3G14470  
Poptr1|347486  
Poptr1|552852,Poptr1|594261  
Poptr1|573114  
Poptr1|585610  
Poptr1|594940,Poptr1|594973,Poptr1|590710  
AT3G46530,AT3G46730,AT3G46710  
AT5G38900 Poptr1|658293  
Poptr1|569041,Poptr1|663695  
Poptr1|587801  
Poptr1|594938,Poptr1|595099  
Poptr1|588246  
AT1G33560,AT5G04720,AT4G33300 Poptr1|710696,Poptr1|703092  
Poptr1|557827  
AT3G50950 Poptr1|584943  
Poptr1|584667,Poptr1|593284,Poptr1|582510,Poptr1|593455,Poptr1|552861,Poptr1|593240,Poptr1|57063  
2,Poptr1|583541,Poptr1|552880,Poptr1|101539,Poptr1|587926,Poptr1|104629  
Poptr1|596903  
Poptr1|585617  
Poptr1|62940  
Poptr1|104595,Poptr1|586242,Poptr1|555021  
Poptr1|594920  
Poptr1|645193  
Poptr1|98433  
Poptr1|588243  
Poptr1|102693

Poptr1|102426,Poptr1|595962,Poptr1|594256,Poptr1|590214,Poptr1|592871,Poptr1|592866,Poptr1|57829  
 3,Poptr1|592863,Poptr1|107946,Poptr1|592824,Poptr1|570123,Poptr1|592870,Poptr1|581295,Poptr1|569471,Poptr1|5  
 52938  
 Poptr1|593064  
 Poptr1|108072  
 Poptr1|573113  
 Poptr1|580189  
 Poptr1|583146  
 Poptr1|675246  
 Poptr1|679204,Poptr1|675462  
 Poptr1|560178,Poptr1|678528  
 Poptr1|591363  
 Poptr1|101482  
 Poptr1|571185,Poptr1|584848  
 Poptr1|574520  
 Poptr1|103737,Poptr1|355498  
 Poptr1|100757,Poptr1|579712,Poptr1|104738,Poptr1|579651,Poptr1|574187,Poptr1|574186,Poptr1|10363  
 6  
 Poptr1|678930  
 Poptr1|586405  
 Poptr1|545461,Poptr1|356707  
 Poptr1|660243  
 AT5G43470,AT5G48620,AT5G35450,AT1G53350,AT1G58400,AT1G58410,AT1G58848,AT1G59218,AT1G58807,AT1  
 G59124,AT1G58602,AT1G58390,AT1G59620,AT1G59780,AT1G50180  
 Poptr1|554587,Poptr1|350440,Poptr1|597405,Poptr1|585803  
 Poptr1|585635  
 Poptr1|586330  
 Poptr1|357186,Poptr1|597358,Poptr1|107655,Poptr1|595963,Poptr1|349316,Poptr1|99770,Poptr1|553401,  
 Poptr1|104568,Poptr1|595138,Poptr1|571047,Poptr1|99764,Poptr1|99768,Poptr1|357182,Poptr1|571956,Poptr1|5904  
 03,Poptr1|588879,Poptr1|590399,Poptr1|593536,Poptr1|593533,Poptr1|594748,Poptr1|109029,Poptr1|97986,Poptr1|6  
 74043,Poptr1|585619,Poptr1|588873,Poptr1|585632,Poptr1|585633,Poptr1|102047,Poptr1|594937,Poptr1|99769,Poptr  
 1|588843  
 Poptr1|553042  
 Poptr1|103227  
 Poptr1|553498  
 Poptr1|100762  
 Poptr1|109046  
 AT4G16095  
 Poptr1|552879  
 Poptr1|100053,Poptr1|100043,Poptr1|100058,Poptr1|105745  
 Poptr1|583413  
 AT3G26470 Poptr1|105843  
 Poptr1|562288  
 Poptr1|107254  
 Poptr1|679724  
 Poptr1|106331  
 Poptr1|581304  
 Poptr1|581678  
 Poptr1|348694  
 Poptr1|671865  
 AT2G43780  
 Poptr1|574418,Poptr1|675668  
 AT5G01940 Poptr1|550314  
 AT5G20920 Poptr1|700090,Poptr1|574465,Poptr1|104247  
 AT3G07920  
 AT4G09150 Poptr1|592309  
 AT1G22930 Poptr1|349244,Poptr1|704842  
 AT5G03750,AT5G03450 Poptr1|589489  
 Poptr1|698687  
 AT5G14640  
 AT1G57870,AT1G09840 Poptr1|583502,Poptr1|703777  
 Poptr1|711412,Poptr1|731636  
 AT2G30980,AT1G06390 Poptr1|647851,Poptr1|699025  
 AT5G26751,AT3G05840 Poptr1|581623,Poptr1|699675  
 AT4G18710  
 AT4G00720,AT3G61160 Poptr1|663875,Poptr1|644407  
 AT4G17150 Poptr1|652311,Poptr1|672024  
 AT3G23540,AT4G14290 Poptr1|345589  
 AT1G20380,AT1G76140  
 Poptr1|670604  
 Poptr1|642868,Poptr1|684669  
 Poptr1|73117,Poptr1|715579  
 Poptr1|642867  
 Poptr1|642869  
 AT1G73810  
 AT5G14550 Poptr1|691558  
 AT1G51770,AT3G21310  
 AT5G57270,AT4G25870  
 AT1G10880  
 AT5G25970,AT5G11730 Poptr1|577893,Poptr1|695068  
 AT4G32290,AT5G25330  
 AT3G52060 Poptr1|597469,Poptr1|660122,Poptr1|353232

Poptr1|574412  
Poptr1|580253  
AT5G16170 Poptr1|546476  
AT2G19160,AT4G30060 Poptr1|652880  
AT5G25990 Poptr1|596769,Poptr1|564553  
AT5G22070 Poptr1|64155  
AT1G10280 Poptr1|583473  
AT1G68380,AT1G68390 Poptr1|103250,Poptr1|574922,Poptr1|354195,Poptr1|566591  
Poptr1|597218,Poptr1|583479  
AT4G31350  
AT1G11940,AT1G62305 Poptr1|348605  
AT1G69370 Poptr1|353901,Poptr1|566969  
Poptr1|701854  
AT5G10870 Poptr1|58596  
AT3G29200  
AT5G62810 Poptr1|355884  
AT4G18260 Poptr1|568448  
AT4G09200,AT4G09310,AT4G09250  
AT1G35470,AT4G09340 Poptr1|574251,Poptr1|740713  
AT1G07090  
Poptr1|588943,Poptr1|354584,Poptr1|342236,Poptr1|559709  
AT3G04510,AT5G28490 Poptr1|571095,Poptr1|573716,Poptr1|556868  
AT2G42610 Poptr1|660852,Poptr1|585775,Poptr1|341556,Poptr1|700508  
Poptr1|555675,Poptr1|660779  
AT3G23290  
Poptr1|722583,Poptr1|706622  
AT1G16910,AT1G78815,AT4G18610  
Poptr1|550562,Poptr1|727377  
AT2G31160  
AT5G58500  
AT3G57170 Poptr1|576218,Poptr1|344117  
Poptr1|655289,Poptr1|719479,Poptr1|593947  
AT2G25737 Poptr1|344681  
Poptr1|701973  
AT1G11540 Poptr1|647679  
Poptr1|712422,Poptr1|691264  
Poptr1|64004,Poptr1|64005  
AT1G61740  
AT4G21260,AT4G21250  
AT1G54470 Poptr1|589750  
AT2G36630 Poptr1|702792  
AT3G11890,AT3G11860 Poptr1|653432  
AT5G25490  
Poptr1|561867,Poptr1|669032  
AT2G26695 Poptr1|60761,Poptr1|685684  
AT3G15680 Poptr1|712480,Poptr1|691199  
Poptr1|72934  
Poptr1|593166,Poptr1|550994  
AT1G75330  
Poptr1|657359,Poptr1|565037,Poptr1|658128  
AT1G67420  
AT4G14385 Poptr1|694759,Poptr1|710685  
AT1G47570 Poptr1|573616,Poptr1|744680  
AT3G45830 Poptr1|54769,Poptr1|49042  
AT1G55265 Poptr1|547634,Poptr1|547633,Poptr1|547635,Poptr1|555229  
AT3G07460,AT3G07470 Poptr1|573209,Poptr1|348929  
AT5G19860 Poptr1|693110,Poptr1|547636  
AT5G16380  
AT5G54530 Poptr1|569042,Poptr1|571445  
AT1G61667 Poptr1|660489,Poptr1|555443  
Poptr1|723716,Poptr1|720441  
AT3G18290 Poptr1|569807  
AT1G74760  
AT1G18910 Poptr1|570008,Poptr1|354194  
AT1G74770,AT1G18920 Poptr1|700883  
Poptr1|572968,Poptr1|348613  
AT3G04090,AT5G18290 Poptr1|571161,Poptr1|573880,Poptr1|587423  
AT2G25920 Poptr1|711366,Poptr1|664376  
Poptr1|353798  
AT1G54310 Poptr1|724233  
AT1G65220,AT5G36230 Poptr1|703858,Poptr1|665579  
AT1G20990 Poptr1|73224  
Poptr1|101235,Poptr1|353546  
Poptr1|703585  
AT2G16050 Poptr1|649475,Poptr1|556422  
AT2G37780  
AT3G16670,AT3G16660 Poptr1|697818  
AT2G42900 Poptr1|559476  
Poptr1|349066  
AT3G04280 Poptr1|63125  
Poptr1|587618,Poptr1|573776,Poptr1|58871,Poptr1|63124  
AT5G26594 Poptr1|553262

Poptr1|554831,Poptr1|350678,Poptr1|350631,Poptr1|554791,Poptr1|586449,Poptr1|554793,Poptr1|54797  
1,Poptr1|547972,Poptr1|547973  
Poptr1|574717,Poptr1|569581  
AT5G53490  
AT1G57610,AT1G09575 Poptr1|571949,Poptr1|574447  
AT2G47485,AT3G62650 Poptr1|700417,Poptr1|348306  
AT4G11175Poptr1|654013,Poptr1|668924  
AT3G29330 Poptr1|701860  
AT5G05520,AT3G11070 Poptr1|687307,Poptr1|696772  
AT1G73655,AT1G18170 Poptr1|699519  
AT2G47600 Poptr1|688262  
AT1G56290 Poptr1|569059,Poptr1|555467  
AT2G21980,AT2G41350 Poptr1|344122  
AT1G30950 Poptr1|676353  
AT1G09815 Poptr1|58934,Poptr1|571392  
AT1G71860 Poptr1|574306,Poptr1|592214  
AT3G07130 Poptr1|553182  
AT3G52810,AT3G52820  
Poptr1|584584  
AT4G13700 Poptr1|554821  
AT3G52780  
Poptr1|577428  
AT2G32770  
Poptr1|108867  
AT3G20500 Poptr1|688056  
Poptr1|678415  
Poptr1|677944,Poptr1|572059,Poptr1|732624  
AT5G48440  
Poptr1|732626  
AT3G21680 Poptr1|348633,Poptr1|572958  
Poptr1|580414,Poptr1|590929,Poptr1|574414,Poptr1|672286,Poptr1|672287,Poptr1|745009  
AT3G59770 Poptr1|672285  
AT3G25805 Poptr1|562755,Poptr1|566645  
AT5G55600 Poptr1|550192  
Poptr1|351244  
AT3G25855 Poptr1|566638  
AT1G68580 Poptr1|686332,Poptr1|566639  
AT4G21130,AT4G05410 Poptr1|579275,Poptr1|558393,Poptr1|718559  
AT1G72410,AT1G17360 Poptr1|584141,Poptr1|349668  
Poptr1|745852,Poptr1|673224  
AT1G10170 Poptr1|97020,Poptr1|355085  
Poptr1|564024  
AT5G05660 Poptr1|567269  
AT1G64570 Poptr1|544806  
AT4G21560,AT4G05000 Poptr1|687498,Poptr1|555508  
AT1G73885  
Poptr1|680883  
Poptr1|596473,Poptr1|590360,Poptr1|596471  
AT4G02580 Poptr1|710930,Poptr1|559635  
AT1G71100  
AT5G44520  
Poptr1|560392  
AT2G01290 Poptr1|566525,Poptr1|686311,Poptr1|640727  
Poptr1|560391  
AT3G04790 Poptr1|106551,Poptr1|595438,Poptr1|571023  
AT5G56090 Poptr1|582551,Poptr1|708165  
AT5G08420 Poptr1|719150  
AT1G22670  
AT1G35625,AT1G35630,AT4G09560  
AT5G07225  
Poptr1|584343  
AT1G71980 Poptr1|103013,Poptr1|592251,Poptr1|702554  
AT5G66160 Poptr1|593821  
AT1G02020 Poptr1|347842  
AT3G06500 Poptr1|577398  
Poptr1|720811  
Poptr1|572412,Poptr1|573290,Poptr1|652065,Poptr1|591295,Poptr1|572413,Poptr1|573291,Poptr1|34810  
2  
AT1G56560 Poptr1|581668,Poptr1|570694  
AT5G22510  
AT3G05820  
Poptr1|685437  
AT1G22650,AT1G72000 Poptr1|574265,Poptr1|59529  
Poptr1|563618,Poptr1|698809  
AT4G34860 Poptr1|546709,Poptr1|54405  
AT1G35580,AT4G09510  
AT5G50240  
AT3G48330  
Poptr1|733450,Poptr1|662075  
AT3G06520  
AT2G46840  
AT1G06340 Poptr1|584156

Poptr1|692249  
AT1G11420,AT2G47220,AT2G47230,AT1G26540,AT1G03300,AT5G23770,AT5G23780,AT5G23800,AT3G62300  
AT1G09320  
AT1G54160,AT3G14020  
AT1G72830,AT1G17590 Poptr1|668702,Poptr1|561021  
AT2G34720,AT1G30500 Poptr1|675405,Poptr1|550256  
Poptr1|652752,Poptr1|549314  
AT5G12840 Poptr1|641280,Poptr1|557856  
AT5G06510,AT3G05690 Poptr1|561162,Poptr1|576480  
AT3G20910  
AT5G41560 Poptr1|709269  
AT4G24175 Poptr1|559845  
Poptr1|572532,Poptr1|565402,Poptr1|586036,Poptr1|554316  
AT5G48120 Poptr1|693673  
AT1G65090,AT5G36100 Poptr1|574044  
Poptr1|557230  
Poptr1|674145,Poptr1|577408  
Poptr1|585804  
AT3G48530 Poptr1|570249,Poptr1|575342  
AT1G69800  
Poptr1|109259  
Poptr1|693759  
AT4G23900,AT4G11010  
AT1G17410  
Poptr1|107419  
AT4G09320 Poptr1|644252,Poptr1|591761  
Poptr1|341656,Poptr1|640355  
AT5G63310 Poptr1|356005  
Poptr1|107498,Poptr1|591924,Poptr1|582516  
Poptr1|589075,Poptr1|594558,Poptr1|586611  
Poptr1|579221,Poptr1|342611  
AT2G15695 Poptr1|649540,Poptr1|704315  
AT5G44250  
AT3G08610 Poptr1|577224  
AT1G73870  
AT1G49130  
AT1G07050  
Poptr1|742447  
Poptr1|658893  
AT1G25440,AT1G68520  
Poptr1|641709  
AT1G72470 Poptr1|349422,Poptr1|98989  
AT5G13150 Poptr1|48590  
AT5G03540 Poptr1|725398,Poptr1|353224  
Poptr1|563471,Poptr1|567808  
AT5G52340 Poptr1|352135,Poptr1|576514  
AT5G13990 Poptr1|586675,Poptr1|549744  
AT5G59730 Poptr1|558114,Poptr1|549217  
AT1G07725,AT2G28640,AT2G28650  
AT1G07000  
AT3G29400 Poptr1|681584,Poptr1|668663,Poptr1|577751,Poptr1|577750  
AT5G58430 Poptr1|574536,Poptr1|729210  
AT4G31540 Poptr1|58623,Poptr1|583127  
Poptr1|585326,Poptr1|673798  
AT1G51640  
AT1G54090,AT3G14090  
AT3G55150,AT2G39380 Poptr1|104666,Poptr1|344941  
AT5G52350  
AT5G61010 Poptr1|596423  
AT5G50380 Poptr1|662149,Poptr1|575343  
AT3G09530,AT3G09520 Poptr1|561517  
Poptr1|592070,Poptr1|557982,Poptr1|64308  
AT3G11320,AT5G05820 Poptr1|567323,Poptr1|563971  
AT1G12500 Poptr1|646517,Poptr1|548555  
Poptr1|572983  
AT3G10290,AT5G04160 Poptr1|560460  
AT1G77610,AT1G21870 Poptr1|694558,Poptr1|551463  
Poptr1|590557,Poptr1|104884  
AT4G36400 Poptr1|76361  
AT1G20070 Poptr1|550861,Poptr1|559853  
AT1G01380,AT4G01060  
AT2G46410  
Poptr1|679515,Poptr1|562293,Poptr1|568212,Poptr1|694076  
Poptr1|552257  
AT2G30432,AT2G30420,AT5G53200 Poptr1|591383,Poptr1|569482  
AT4G02020 Poptr1|348349,Poptr1|731686  
AT2G23380 Poptr1|719252,Poptr1|694432  
AT1G02580  
AT1G11905,AT3G20450  
AT5G42570 Poptr1|664749  
Poptr1|568053,Poptr1|746144  
AT3G07190,AT5G48660 Poptr1|665072,Poptr1|692065



Poptr1|569127  
AT4G27010,AT1G72270 Poptr1|700019  
AT2G39910 Poptr1|696812  
AT1G72450,AT1G17380 Poptr1|584130,Poptr1|645806  
AT1G19180,AT1G74950 Poptr1|739191  
AT1G32800,AT4G10600 Poptr1|550449  
AT5G67380  
Poptr1|551798  
Poptr1|716327,Poptr1|684971  
AT3G50000,AT2G23080  
AT2G23070  
Poptr1|716331,Poptr1|693602  
Poptr1|108028  
AT2G28820  
AT5G02410 Poptr1|685749  
Poptr1|590132  
AT4G23410  
AT5G23030 Poptr1|596447  
AT5G60220,AT3G45600 Poptr1|686918  
AT5G57810,AT2G01960 Poptr1|352407,Poptr1|578678  
AT4G30430,AT2G23810,AT4G28050 Poptr1|578676,Poptr1|685617  
AT2G19580 Poptr1|717525  
AT1G63260 Poptr1|709387  
AT5G46700 Poptr1|646253,Poptr1|689481  
AT1G18520  
AT3G12090 Poptr1|720187,Poptr1|698651  
Poptr1|672246  
AT2G03840  
Poptr1|99182,Poptr1|584471,Poptr1|553395,Poptr1|584472  
AT5G44780,AT4G20020  
AT2G44195 Poptr1|582344  
AT2G44200  
Poptr1|567532,Poptr1|686518  
AT5G24470 Poptr1|732723,Poptr1|574629,Poptr1|699541,Poptr1|348165,Poptr1|572468  
AT2G46670,AT2G46790  
AT5G61380 Poptr1|97435  
AT5G02810  
AT5G60100  
AT4G24440 Poptr1|716390  
AT5G04920 Poptr1|563503,Poptr1|687442,Poptr1|597609  
AT4G13720 Poptr1|343808,Poptr1|690926  
Poptr1|660215  
AT4G04780,AT1G33450,AT5G15690 Poptr1|568001,Poptr1|647581  
AT2G01340  
Poptr1|709990,Poptr1|648121  
AT5G37840,AT1G66480  
AT1G71015 Poptr1|345298  
AT5G37130,AT5G17270 Poptr1|714236  
AT5G05190 Poptr1|581087  
AT4G33540  
Poptr1|564197,Poptr1|567054  
AT5G48830 Poptr1|348955  
AT5G27720 Poptr1|664457,Poptr1|552428  
AT3G55810,AT3G55650,AT3G25960,AT3G04050 Poptr1|104758  
Poptr1|576765  
AT3G22960 Poptr1|687085,Poptr1|686233  
AT1G32440 Poptr1|739995,Poptr1|580106  
Poptr1|578193  
AT2G36580,AT3G52990  
Poptr1|346918,Poptr1|563648  
AT5G08570,AT5G63680 Poptr1|719940,Poptr1|725208  
Poptr1|707462  
AT5G52920 Poptr1|569454  
Poptr1|582013  
Poptr1|720489,Poptr1|698714  
Poptr1|49331,Poptr1|697397  
Poptr1|576767  
Poptr1|559622  
Poptr1|559621  
Poptr1|589553  
AT1G50020  
AT5G56350,AT4G26390 Poptr1|693136,Poptr1|48424  
AT3G50670  
Poptr1|686081,Poptr1|593950  
Poptr1|679248  
AT1G79720 Poptr1|684759,Poptr1|547702  
Poptr1|578844  
AT5G37540,AT1G66180 Poptr1|555992,Poptr1|348764  
AT5G22850 Poptr1|63834,Poptr1|721219  
AT1G08210  
AT4G30040,AT4G30030  
AT5G24820

AT3G25700 Poptr1|564485  
 AT1G25510 Poptr1|564505,Poptr1|658926  
 AT3G52500 Poptr1|561428,Poptr1|576523  
 Poptr1|552837,Poptr1|560781  
 Poptr1|594961  
 AT3G18490 Poptr1|580224  
 AT1G01300 Poptr1|684312,Poptr1|700293  
 Poptr1|578741  
 AT2G42980,AT3G59080 Poptr1|52072  
 AT3G02740  
 AT3G42550  
 AT2G28010,AT2G28030,AT2G28220,AT2G28040  
 AT3G12700  
 AT4G04985 Poptr1|577335  
 AT1G05840 Poptr1|572889  
 AT1G65240,AT5G36260  
 Poptr1|673341  
 Poptr1|554979  
 AT3G20015 Poptr1|650599,Poptr1|53135  
 Poptr1|741238  
 AT3G54400  
 Poptr1|583928  
 AT5G02190 Poptr1|652998  
 AT5G07030 Poptr1|708469,Poptr1|350882  
 Poptr1|574078  
 AT5G33340,AT1G64830 Poptr1|348417,Poptr1|572545,Poptr1|580115  
 AT2G39710 Poptr1|563921,Poptr1|659657  
 AT4G16563 Poptr1|103600,Poptr1|346173,Poptr1|553865  
 Poptr1|744819  
 AT1G31450,AT2G35615 Poptr1|554144  
 AT3G61820  
 Poptr1|661689  
 Poptr1|578740  
 AT2G23945 Poptr1|561371  
 Poptr1|578326  
 Poptr1|587818  
 AT1G09750 Poptr1|551646  
 Poptr1|578658,Poptr1|672083  
 Poptr1|592475  
 AT2G36670 Poptr1|576772  
 Poptr1|710172  
 AT5G45120 Poptr1|100207  
 Poptr1|694447  
 AT5G10760,AT5G10770 Poptr1|737438  
 AT3G50050  
 AT5G43100 Poptr1|740528  
 AT2G03200 Poptr1|60217,Poptr1|549896  
 AT4G12920  
 Poptr1|737445,Poptr1|702084,Poptr1|578327,Poptr1|702082,Poptr1|561695,Poptr1|581446,Poptr1|34464  
 0  
 AT3G59800 Poptr1|562138  
 AT2G43795  
 AT1G71730  
 Poptr1|559430,Poptr1|579720,Poptr1|347080  
 AT1G51360,AT2G31670 Poptr1|97866,Poptr1|726985  
 Poptr1|659588  
 AT3G09035,AT5G01090,AT3G54080 Poptr1|351859,Poptr1|667954  
 AT1G35170,AT1G35180,AT1G45010 Poptr1|72957  
 Poptr1|104650  
 AT5G27730 Poptr1|581881,Poptr1|699730  
 Poptr1|552497,Poptr1|572645  
 Poptr1|557061,Poptr1|556656  
 AT5G47900 Poptr1|554653,Poptr1|63246  
 Poptr1|575051  
 AT3G43684  
 Poptr1|355528,Poptr1|587980,Poptr1|591385,Poptr1|96883,Poptr1|587094  
 Poptr1|589245,Poptr1|72259,Poptr1|597570,Poptr1|594234,Poptr1|587523,Poptr1|593656,Poptr1|593439,  
 Poptr1|583979,Poptr1|585183,Poptr1|581816,Poptr1|590954,Poptr1|595171,Poptr1|593167,Poptr1|591229  
 Poptr1|574064,Poptr1|568613  
 Poptr1|575602  
 AT2G20420 Poptr1|645589,Poptr1|730612  
 AT4G21530 Poptr1|713678  
 AT1G24265,AT1G24267  
 Poptr1|657916,Poptr1|666828,Poptr1|554754,Poptr1|671125,Poptr1|657915,Poptr1|679292,Poptr1|67112  
 4,Poptr1|680937,Poptr1|63151  
 Poptr1|593228  
 AT4G16130 Poptr1|746579  
 Poptr1|582277  
 Poptr1|61038  
 AT3G42850  
 Poptr1|593695  
 AT3G53390,AT2G37160 Poptr1|576679,Poptr1|739435

AT1G32200 Poptr1|739947  
AT2G15890 Poptr1|557326  
Poptr1|574734  
AT4G35590 Poptr1|71890  
AT1G18790,AT1G74480,AT5G66990  
AT5G53040  
AT3G28720 Poptr1|712806,Poptr1|577591  
AT2G47980 Poptr1|572943,Poptr1|692175  
AT1G17030 Poptr1|105970,Poptr1|550347,Poptr1|550345  
Poptr1|588479  
Poptr1|693989  
Poptr1|584899  
AT2G47010 Poptr1|348426  
AT4G09965 Poptr1|574212  
AT5G23160,AT5G08240 Poptr1|571819,Poptr1|582069,Poptr1|562815,Poptr1|558689  
AT5G46750,AT4G17890  
AT2G35210 Poptr1|48146,Poptr1|590013  
AT4G27600 Poptr1|699965  
AT2G41640,AT3G57380  
AT2G03370,AT2G03360 Poptr1|564268,Poptr1|566967  
AT3G10320 Poptr1|652692,Poptr1|576368  
AT3G18170,AT3G18180 Poptr1|569780,Poptr1|574959,Poptr1|574960,Poptr1|355526  
AT3G07050 Poptr1|645400,Poptr1|711279  
AT1G15980 Poptr1|587208  
AT3G06610  
Poptr1|564385,Poptr1|698320  
AT3G15140 Poptr1|569161  
Poptr1|587125  
AT5G37830 Poptr1|645284,Poptr1|555933  
Poptr1|108915,Poptr1|588206  
AT3G24030 Poptr1|63107,Poptr1|350647  
AT2G26970 Poptr1|357155  
Poptr1|565245  
AT3G17900 Poptr1|354857,Poptr1|355058  
AT2G42750 Poptr1|572857  
Poptr1|694024  
AT4G05090 Poptr1|694035  
AT5G54390 Poptr1|579521,Poptr1|568956  
AT5G63980 Poptr1|685957,Poptr1|650608  
AT5G64000,AT5G09290,AT5G63990  
AT2G04940 Poptr1|733374  
AT1G73750  
AT1G15060 Poptr1|723693,Poptr1|720173  
Poptr1|574937,Poptr1|594258,Poptr1|569792  
Poptr1|656851  
AT2G13540 Poptr1|64235,Poptr1|722993  
AT3G43490,AT3G43590,AT5G36240  
Poptr1|556888,Poptr1|594901  
Poptr1|576433  
AT3G18310 Poptr1|345663  
AT1G53820,AT1G72310 Poptr1|684994,Poptr1|356430  
AT2G32080 Poptr1|647415,Poptr1|683525  
Poptr1|573892,Poptr1|571239,Poptr1|571238  
AT3G28350,AT3G28370,AT1G51430 Poptr1|64749  
Poptr1|668480,Poptr1|64750  
AT5G55820 Poptr1|65500  
AT1G03687 Poptr1|582704  
Poptr1|664998  
AT2G35300  
AT1G32560 Poptr1|580088,Poptr1|356610  
AT5G10320 Poptr1|685166  
AT5G05970 Poptr1|353602,Poptr1|698553  
AT5G07270 Poptr1|688615,Poptr1|728552  
AT5G57740 Poptr1|352418,Poptr1|58724  
AT4G00290,AT4G00234 Poptr1|552196,Poptr1|572294  
Poptr1|588256  
Poptr1|596159  
Poptr1|107366,Poptr1|671867  
AT1G17650 Poptr1|595946,Poptr1|579673,Poptr1|592783  
AT3G25530 Poptr1|732551  
AT3G24730 Poptr1|684015  
Poptr1|586093  
Poptr1|583114,Poptr1|579823,Poptr1|567458  
Poptr1|582657,Poptr1|582398,Poptr1|579915,Poptr1|586717,Poptr1|579877,Poptr1|585246  
Poptr1|579632,Poptr1|581704,Poptr1|582494,Poptr1|580261,Poptr1|584258,Poptr1|562351,Poptr1|57343  
1,Poptr1|597633,Poptr1|592064,Poptr1|680917,Poptr1|588531,Poptr1|585426,Poptr1|668836,Poptr1|585929,Poptr1|6  
75852,Poptr1|107511,Poptr1|584217,Poptr1|651165,Poptr1|668863  
Poptr1|585015  
Poptr1|581340,Poptr1|583011  
Poptr1|580842,Poptr1|580174  
Poptr1|581713  
Poptr1|582289,Poptr1|582464,Poptr1|586214,Poptr1|590900,Poptr1|580423

Poptr1|577525,Poptr1|592596,Poptr1|571425,Poptr1|581742,Poptr1|678839,Poptr1|107794,Poptr1|54573  
2,Poptr1|107813,Poptr1|580567,Poptr1|581571,Poptr1|583549,Poptr1|580198,Poptr1|596387,Poptr1|584216  
AT4G04200,AT2G39960 Poptr1|579250,Poptr1|687331,Poptr1|345023  
AT1G16210 Poptr1|649174  
Poptr1|556144  
AT5G61340 Poptr1|569962,Poptr1|581393  
AT1G52980  
Poptr1|703958  
AT5G26600 Poptr1|570656,Poptr1|581602  
AT3G62130 Poptr1|572528,Poptr1|348434  
AT4G22300 Poptr1|61078,Poptr1|55735  
AT3G53770  
AT4G15910 Poptr1|697817  
AT4G02380,AT1G02820 Poptr1|731798,Poptr1|710544  
AT1G54520 Poptr1|742067  
Poptr1|680302  
Poptr1|570984  
Poptr1|564835  
AT1G28260 Poptr1|580918,Poptr1|555784  
AT5G02650  
Poptr1|560381  
AT5G19400 Poptr1|706531  
AT3G26085 Poptr1|696329  
AT5G16550 Poptr1|693860  
Poptr1|349634  
Poptr1|572265  
AT4G01590,AT4G35680  
AT1G23050,AT1G70985 Poptr1|696533,Poptr1|566503  
AT3G06750,AT5G49280,AT4G16140  
AT4G17430 Poptr1|589886,Poptr1|553897  
AT3G52850 Poptr1|577185,Poptr1|577184,Poptr1|344343  
AT2G14720,AT2G14740 Poptr1|707426,Poptr1|697386  
AT2G34940,AT1G30900,AT4G20110 Poptr1|588550,Poptr1|693319,Poptr1|63281  
AT2G30290  
Poptr1|568559,Poptr1|698972  
AT1G50710 Poptr1|568558  
AT3G07510 Poptr1|573188,Poptr1|645382  
Poptr1|54727  
AT2G01580  
AT5G05950 Poptr1|567342  
AT3G46890  
Poptr1|573194,Poptr1|700670  
AT3G04600 Poptr1|721369  
AT5G21990 Poptr1|591080,Poptr1|594857,Poptr1|559008  
AT5G11620Poptr1|561745  
AT5G08565,AT5G63670 Poptr1|563413,Poptr1|660008  
AT2G20725 Poptr1|595219,Poptr1|580387,Poptr1|587957  
AT4G38760 Poptr1|557121  
AT5G24710 Poptr1|695451  
Poptr1|570142,Poptr1|355925,Poptr1|57899,Poptr1|716087  
Poptr1|649204,Poptr1|713359  
AT5G42190 Poptr1|692990,Poptr1|682197,Poptr1|593811  
AT3G53060  
Poptr1|356731  
AT1G75950  
AT3G60020  
AT2G25700,AT1G20140  
AT4G34470,AT4G34210,AT3G60010,AT3G21850,AT3G21860,AT3G21840,AT3G21830,AT2G03160,AT3G25650,AT1  
G10230,AT2G20160,AT2G03190,AT2G03170  
AT4G14320,AT3G23390  
Poptr1|46726  
Poptr1|698748,Poptr1|719050  
AT5G09680 Poptr1|557799,Poptr1|641332  
AT4G25860,AT4G25850,AT5G57240 Poptr1|351684  
AT1G70680,AT1G70670  
AT1G23250,AT1G23240  
AT4G26740,AT5G55240 Poptr1|725917  
AT4G13330 Poptr1|564994  
AT5G29560,AT2G33380  
Poptr1|726818,Poptr1|696503  
Poptr1|64789  
AT5G14660  
Poptr1|680957  
AT2G19830,AT4G29160 Poptr1|561117  
Poptr1|672465  
AT2G35260 Poptr1|590000  
AT4G17840  
Poptr1|748952  
Poptr1|587179,Poptr1|583427  
AT4G21830,AT4G21840,AT4G21850,AT4G04840  
Poptr1|107860  
AT4G04800

Poptr1|707506  
Poptr1|565286  
AT1G53670 Poptr1|568844  
Poptr1|565685  
AT4G04810,AT4G04830,AT4G21860  
AT2G44510,AT5G03830 Poptr1|569331,Poptr1|550571  
AT5G05510 Poptr1|656284  
Poptr1|573064  
AT5G48090  
AT5G55390 Poptr1|550146  
Poptr1|550145  
AT5G48080  
Poptr1|691806  
AT1G21070,AT1G76670,AT5G42420 Poptr1|346503,Poptr1|694941  
AT1G34020,AT4G09810 Poptr1|559417,Poptr1|684550  
Poptr1|677960,Poptr1|585984  
AT2G28315  
AT5G57100 Poptr1|669814,Poptr1|652845  
AT4G39390 Poptr1|695945,Poptr1|694359  
Poptr1|703598,Poptr1|558266  
AT2G30460,AT1G06890 Poptr1|574488,Poptr1|571879  
AT5G55950 Poptr1|707727  
AT4G01940 Poptr1|700388,Poptr1|692248  
Poptr1|642594  
AT2G34840,AT1G30630 Poptr1|682744  
AT2G28910 Poptr1|589953  
AT3G05320 Poptr1|61249  
AT3G60210,AT2G44650 Poptr1|644213,Poptr1|683218  
AT1G44960 Poptr1|350516,Poptr1|548136  
AT5G24520 Poptr1|569681,Poptr1|574635  
Poptr1|576561,Poptr1|352487  
AT1G12910,AT3G26640 Poptr1|677036,Poptr1|644973,Poptr1|747851,Poptr1|572829  
AT3G22680 Poptr1|353752,Poptr1|564862  
AT1G06590 Poptr1|693859  
AT3G48200 Poptr1|345962  
Poptr1|64957  
AT5G39650,AT1G09157 Poptr1|345116  
Poptr1|574316  
AT5G27370 Poptr1|699777  
AT4G28485  
AT3G21550 Poptr1|564478,Poptr1|565691  
Poptr1|59795  
AT3G02430,AT4G24310 Poptr1|596733,Poptr1|98689  
AT3G21520  
AT5G46090,AT4G18425 Poptr1|546448,Poptr1|580950  
AT1G29260 Poptr1|555672,Poptr1|55894  
AT1G10585  
Poptr1|355871,Poptr1|700919  
Poptr1|96843,Poptr1|96844,Poptr1|98216  
AT4G20970 Poptr1|545292,Poptr1|580914  
AT5G60150 Poptr1|71948  
AT2G34190 Poptr1|545167,Poptr1|687562  
AT5G62890 Poptr1|570060,Poptr1|575121  
AT2G05760 Poptr1|57313  
AT1G60030 Poptr1|720220,Poptr1|698119  
AT2G26510 Poptr1|347686,Poptr1|591884  
Poptr1|583005  
Poptr1|76439  
AT5G25420,AT1G65550 Poptr1|572027  
AT1G49960 Poptr1|65301,Poptr1|722433  
AT5G49990  
AT4G38050 Poptr1|719756  
AT2G27810  
Poptr1|741646,Poptr1|54318  
AT1G10540  
AT5G04000 Poptr1|652681,Poptr1|576241  
AT2G02990 Poptr1|589544,Poptr1|686407  
AT1G26820 Poptr1|720331  
AT1G14220  
AT2G39780 Poptr1|732579  
AT1G14210  
AT2G22260 Poptr1|560096  
Poptr1|548501  
AT3G61190,AT2G45760 Poptr1|572200,Poptr1|552128  
Poptr1|647678  
AT5G54680 Poptr1|47600,Poptr1|687616  
AT1G51070  
AT3G23210,AT4G14410 Poptr1|726363  
AT5G50550,AT5G50650,AT2G01470 Poptr1|726873,Poptr1|354255  
AT3G52190 Poptr1|567716  
AT1G36240,AT3G18740,AT1G77940 Poptr1|654831,Poptr1|558583  
Poptr1|648993,Poptr1|679872

AT3G12710  
Poptr1|659018,Poptr1|677241  
AT5G44680 Poptr1|345090,Poptr1|55422,Poptr1|63272,Poptr1|711860  
Poptr1|582686  
AT1G15970,AT1G80850 Poptr1|587209,Poptr1|693206  
AT1G13635 Poptr1|656729,Poptr1|659019  
AT1G75090 Poptr1|347722  
AT5G57970 Poptr1|344491,Poptr1|578745  
Poptr1|657025  
Poptr1|728972,Poptr1|575701,Poptr1|579576,Poptr1|660284,Poptr1|673664  
Poptr1|670179  
AT1G27920 Poptr1|548013,Poptr1|712063  
AT1G14690,AT2G01910 Poptr1|657027  
AT5G51600,AT5G62250  
Poptr1|62862,Poptr1|657026  
AT2G38720 Poptr1|555095  
AT4G26760,AT5G55230 Poptr1|568577,Poptr1|550106  
Poptr1|595390  
AT2G30115Poptr1|547782  
Poptr1|572112  
AT3G60840  
AT5G18230  
Poptr1|699898,Poptr1|738421  
AT2G25680 Poptr1|352844,Poptr1|561812  
AT1G80310  
AT4G31720 Poptr1|669224  
Poptr1|596916,Poptr1|641044,Poptr1|701594  
AT5G66970  
Poptr1|589653  
AT5G49500,AT1G48900,AT1G15310  
AT1G32350 Poptr1|349997  
AT3G27620,AT3G22360,AT3G22370 Poptr1|355229,Poptr1|569498,Poptr1|732929  
AT5G64210  
AT1G72880 Poptr1|597686,Poptr1|597685,Poptr1|592785  
AT4G14930 Poptr1|595817,Poptr1|658531,Poptr1|586709  
Poptr1|584842  
AT5G64860 Poptr1|718902  
AT1G67370 Poptr1|63120,Poptr1|554797  
AT1G30580 Poptr1|684097,Poptr1|582578  
AT1G56050 Poptr1|569187,Poptr1|550540  
Poptr1|588863  
Poptr1|550196  
AT2G04495,AT2G04515 Poptr1|573100  
AT3G13130 Poptr1|701228  
AT1G16950,AT1G29290 Poptr1|568673,Poptr1|693985  
AT1G02300,AT1G02305,AT4G01610 Poptr1|644702,Poptr1|552399  
AT3G43110,AT5G20790 Poptr1|589331  
Poptr1|583692  
AT4G03240 Poptr1|571833  
AT1G04020 Poptr1|349134  
AT4G21070 Poptr1|550126  
AT1G15270,AT3G16040 Poptr1|548838  
AT1G26840 Poptr1|568409  
Poptr1|554880  
AT5G53090,AT5G53100,AT4G27760 Poptr1|96962  
AT3G52860 Poptr1|552455,Poptr1|731805  
Poptr1|556385  
AT5G40830,AT3G27230 Poptr1|643000,Poptr1|652029  
AT4G01240 Poptr1|348025  
AT3G05390 Poptr1|570814  
Poptr1|552898,Poptr1|556002  
AT1G29790 Poptr1|583556,Poptr1|568460,Poptr1|100335  
Poptr1|593154,Poptr1|596821,Poptr1|658636,Poptr1|595821,Poptr1|595916  
AT2G33640 Poptr1|342103,Poptr1|73184  
AT1G69420 Poptr1|353890  
AT4G15080,AT3G22180 Poptr1|344026,Poptr1|575992  
AT4G01730 Poptr1|348439  
AT4G28660  
Poptr1|349103  
AT4G25080 Poptr1|666765,Poptr1|728824  
Poptr1|666764  
AT1G27290 Poptr1|708759,Poptr1|712452  
AT5G09830 Poptr1|641965  
AT2G47650,AT3G62830 Poptr1|342882,Poptr1|572692  
Poptr1|653746  
Poptr1|656070,Poptr1|724745  
AT3G46440,AT5G59290,AT2G28760 Poptr1|706197  
AT2G28755 Poptr1|717080  
AT3G53520 Poptr1|735401  
Poptr1|675337,Poptr1|681513,Poptr1|642436,Poptr1|569137  
AT2G38130 Poptr1|585116,Poptr1|65656,Poptr1|587739  
Poptr1|589299

AT1G50030 Poptr1|697399,Poptr1|65321  
AT3G09470 Poptr1|695442  
AT2G46520 Poptr1|644596,Poptr1|664131,Poptr1|576962  
AT3G05625 Poptr1|699711  
AT5G27320,AT3G05120 Poptr1|687947,Poptr1|742187  
AT3G63010 Poptr1|552633,Poptr1|731944  
Poptr1|592980  
Poptr1|747244,Poptr1|557359  
Poptr1|596375  
Poptr1|555832,Poptr1|60386,Poptr1|564508  
AT5G23530 Poptr1|648080  
Poptr1|556886  
Poptr1|582891  
AT1G47480 Poptr1|591916  
Poptr1|550279,Poptr1|108274  
AT5G06570 Poptr1|653428,Poptr1|576446  
Poptr1|586846,Poptr1|579302  
AT1G49650,AT1G49660,AT1G49640,AT3G48700,AT3G48690,AT2G03550,AT1G19190  
Poptr1|54495,Poptr1|61775,Poptr1|102908,Poptr1|97500,Poptr1|557364,Poptr1|596315,Poptr1|722194,P  
optr1|596317,Poptr1|54494  
Poptr1|585669,Poptr1|587058  
AT2G45600 Poptr1|730928  
Poptr1|581341  
Poptr1|585194  
AT1G68620  
Poptr1|586799,Poptr1|65869  
Poptr1|552820  
Poptr1|582326  
Poptr1|584344,Poptr1|592252,Poptr1|667561  
AT5G62180 Poptr1|575758  
Poptr1|581497  
Poptr1|581492  
Poptr1|557356,Poptr1|581494,Poptr1|557367,Poptr1|747624  
Poptr1|561889  
AT5G16080  
Poptr1|579746,Poptr1|592537  
Poptr1|107326,Poptr1|593491  
Poptr1|571913  
Poptr1|571446  
Poptr1|591917,Poptr1|591918  
Poptr1|576116,Poptr1|593248  
Poptr1|547785,Poptr1|555093  
Poptr1|571184  
Poptr1|649531,Poptr1|596314  
Poptr1|557360  
AT2G45610 Poptr1|342714  
Poptr1|744261,Poptr1|722179  
AT2G18450  
AT5G66760 Poptr1|593943,Poptr1|53373  
AT5G25570 Poptr1|561806,Poptr1|570611  
AT3G04650 Poptr1|571058,Poptr1|59932  
AT3G13275 Poptr1|582556,Poptr1|642674,Poptr1|562451,Poptr1|558395  
AT5G57950 Poptr1|653576  
Poptr1|584455  
AT1G34370 Poptr1|574295,Poptr1|678093  
AT5G20520 Poptr1|344359,Poptr1|688966  
AT3G12370  
AT5G13510 Poptr1|720654,Poptr1|698629  
AT4G23330 Poptr1|646623,Poptr1|691130  
Poptr1|572403,Poptr1|661530  
Poptr1|348089  
AT3G49250 Poptr1|569560  
AT2G02790,AT1G14380  
Poptr1|701813  
AT1G18840,AT1G74690 Poptr1|661888,Poptr1|581360  
AT2G35800  
AT2G26360 Poptr1|720749,Poptr1|687381  
AT2G44760 Poptr1|342652  
AT3G12760  
Poptr1|682414  
AT4G04350 Poptr1|698831  
Poptr1|680015  
AT2G28390 Poptr1|697722,Poptr1|680017  
AT3G54210  
Poptr1|58280,Poptr1|702817  
AT5G13030 Poptr1|48466  
Poptr1|64890  
AT1G27200 Poptr1|565215  
AT4G37420 Poptr1|559956  
AT3G27330,AT5G40720 Poptr1|706898  
AT4G10800 Poptr1|554539,Poptr1|548282  
AT3G05675 Poptr1|576499,Poptr1|561152

AT3G24810,AT5G48820 Poptr1|553160  
Poptr1|707231  
AT2G32710 Poptr1|736076  
AT3G25920 Poptr1|566617,Poptr1|354177  
AT5G40500  
Poptr1|64805,Poptr1|736158  
Poptr1|345516  
AT1G13160,AT4G31520  
AT3G18100 Poptr1|574971  
Poptr1|349724  
Poptr1|553861,Poptr1|351375,Poptr1|558173  
AT4G25200,AT5G51440 Poptr1|693521  
AT3G44326  
AT2G27310 Poptr1|679894  
AT2G36090 Poptr1|595165  
AT1G32530,AT2G35330 Poptr1|589991,Poptr1|580093  
Poptr1|345580  
AT5G59420,AT5G02100,AT3G09300 Poptr1|717366  
Poptr1|574034,Poptr1|589722,Poptr1|566740,Poptr1|580210,Poptr1|580208,Poptr1|568402  
AT1G20350  
AT2G37410 Poptr1|48388,Poptr1|96928,Poptr1|565047  
AT5G11690  
Poptr1|565884  
AT5G57500 Poptr1|580464  
Poptr1|587282,Poptr1|75376  
AT1G64850 Poptr1|571346  
AT3G15250,AT1G53165 Poptr1|579440,Poptr1|660914  
AT1G14730 Poptr1|354331,Poptr1|726759  
Poptr1|581121,Poptr1|354330  
AT4G25570 Poptr1|662338,Poptr1|701190  
AT5G38630 Poptr1|714388,Poptr1|704145,Poptr1|696590  
Poptr1|566404  
AT1G26100 Poptr1|566685,Poptr1|696591  
AT3G54690 Poptr1|710940,Poptr1|108986,Poptr1|559710  
AT5G44270  
AT1G03780 Poptr1|107563,Poptr1|75311,Poptr1|594654  
AT3G13790,AT3G13784,AT1G55120  
AT1G62660,AT1G12240 Poptr1|350217,Poptr1|711782  
Poptr1|733965  
AT5G11920Poptr1|716776,Poptr1|561648  
AT3G52600,AT2G36190 Poptr1|576574,Poptr1|58055,Poptr1|685605  
AT1G65030 Poptr1|570352  
AT1G02260  
Poptr1|583420,Poptr1|592843,Poptr1|584317,Poptr1|592846,Poptr1|678542,Poptr1|583419,Poptr1|67854  
1,Poptr1|350245,Poptr1|681555,Poptr1|678544,Poptr1|675587,Poptr1|673352  
Poptr1|570428,Poptr1|575848  
Poptr1|681264,Poptr1|681554,Poptr1|667058  
AT3G19630 Poptr1|684007  
AT2G39670 Poptr1|563910  
AT1G60230 Poptr1|657532  
Poptr1|565199  
AT5G66890 Poptr1|76159  
Poptr1|563015,Poptr1|76154  
AT5G66910,AT5G66900 Poptr1|563014,Poptr1|76151  
AT2G05950 Poptr1|674164  
Poptr1|679207  
Poptr1|355740,Poptr1|65655  
Poptr1|65677  
Poptr1|71920,Poptr1|577983,Poptr1|101732,Poptr1|355684,Poptr1|72317,Poptr1|98037,Poptr1|101357,P  
optr1|101709,Poptr1|105176,Poptr1|101463,Poptr1|106315,Poptr1|102893,Poptr1|64825,Poptr1|355770,Poptr1|1032  
07,Poptr1|102275,Poptr1|72232,Poptr1|349872,Poptr1|545715,Poptr1|98955,Poptr1|102242,Poptr1|101268,Poptr1|10  
7590,Poptr1|104136,Poptr1|75813,Poptr1|100519,Poptr1|357166,Poptr1|545373,Poptr1|357039,Poptr1|64354,Poptr1|  
76049,Poptr1|98923,Poptr1|351790,Poptr1|663433  
Poptr1|65370,Poptr1|553499,Poptr1|102723,Poptr1|101358,Poptr1|104296,Poptr1|98036,Poptr1|102873,  
Poptr1|75281,Poptr1|640917,Poptr1|98035,Poptr1|63792,Poptr1|64854,Poptr1|549423,Poptr1|104176,Poptr1|352057,  
Poptr1|103074,Poptr1|565950,Poptr1|546025,Poptr1|72077,Poptr1|103003,Poptr1|65584,Poptr1|106393,Poptr1|6578  
0,Poptr1|103113,Poptr1|98400,Poptr1|103122,Poptr1|559094,Poptr1|559137,Poptr1|102135,Poptr1|100128,Poptr1|76  
066,Poptr1|102664,Poptr1|75807,Poptr1|99504,Poptr1|108500,Poptr1|349817,Poptr1|103837,Poptr1|103008,Poptr1|6  
72339,Poptr1|108458,Poptr1|103482,Poptr1|351208,Poptr1|545967,Poptr1|357164,Poptr1|63030,Poptr1|65574,Poptr  
1|64061,Poptr1|103584,Poptr1|108292,Poptr1|100957,Poptr1|349812,Poptr1|98040,Poptr1|108452,Poptr1|97888,Pop  
tr1|666234,Poptr1|355510,Poptr1|105061,Poptr1|99935,Poptr1|64179,Poptr1|101905,Poptr1|545704,Poptr1|675608,P  
optr1|99673,Poptr1|102753,Poptr1|352387,Poptr1|64563,Poptr1|100806,Poptr1|661721,Poptr1|354974,Poptr1|99399,  
Poptr1|99583,Poptr1|64108,Poptr1|103867,Poptr1|100855,Poptr1|64175,Poptr1|101780,Poptr1|72349,Poptr1|352060,  
Poptr1|65611,Poptr1|64271,Poptr1|545899,Poptr1|65155,Poptr1|352430,Poptr1|348645,Poptr1|64086,Poptr1|545157,  
Poptr1|354946,Poptr1|65564,Poptr1|105055,Poptr1|97175,Poptr1|102816,Poptr1|75276,Poptr1|677248,Poptr1|10205  
1,Poptr1|103551,Poptr1|72316,Poptr1|577984,Poptr1|102358,Poptr1|546078,Poptr1|103252,Poptr1|63838,Poptr1|349  
220,Poptr1|72155,Poptr1|350787,Poptr1|102503,Poptr1|98032,Poptr1|355019,Poptr1|578227,Poptr1|104101,Poptr1|1  
01731,Poptr1|349215,Poptr1|106205,Poptr1|545856,Poptr1|105291,Poptr1|96864,Poptr1|64020,Poptr1|64020,Poptr1|  
1|545972,Poptr1|559013,Poptr1|107816,Poptr1|104261,Poptr1|104104,Poptr1|106326,Poptr1|101895,Poptr1|106071,  
Poptr1|99763,Poptr1|348183,Poptr1|593985,Poptr1|103262,Poptr1|106570,Poptr1|100962,Poptr1|101279,Poptr1|560  
980,Poptr1|677353,Poptr1|100281,Poptr1|65859,Poptr1|547919,Poptr1|102964,Poptr1|103130,Poptr1|97665,Poptr1|5  
69952,Poptr1|101418,Poptr1|107180,Poptr1|681193,Poptr1|675205,Poptr1|577887,Poptr1|107379,Poptr1|593994,Pop



ptr1|102942,Poptr1|106117,Poptr1|108780,Poptr1|64495,Poptr1|545722,Poptr1|662402,Poptr1|108805,Poptr1|104245  
Poptr1|108328,Poptr1|99661,Poptr1|76004,Poptr1|107533,Poptr1|545894,Poptr1|678286,Poptr1|100534,Poptr1|1021  
31,Poptr1|678791,Poptr1|64213,Poptr1|553496,Poptr1|64674,Poptr1|102874,Poptr1|96868,Poptr1|100868,Poptr1|973  
05,Poptr1|100309,Poptr1|102528,Poptr1|100857,Poptr1|560217,Poptr1|99980,Poptr1|100646,Poptr1|349548,Poptr1|9  
9893,Poptr1|75898,Poptr1|75939,Poptr1|641294,Poptr1|103494,Poptr1|103626,Poptr1|101001,Poptr1|76388,Poptr1|1  
06535,Poptr1|72082,Poptr1|98080,Poptr1|101002,Poptr1|103495,Poptr1|676812,Poptr1|348574,Poptr1|99872,Poptr1|  
99874,Poptr1|105753,Poptr1|65157,Poptr1|680202,Poptr1|105661,Poptr1|349892,Poptr1|99778,Poptr1|357140,Poptr  
1|349834,Poptr1|98062,Poptr1|545900,Poptr1|103266,Poptr1|65127,Poptr1|105420,Poptr1|680211,Poptr1|60802,Poptr  
r1|104678,Poptr1|99684,Poptr1|101585,Poptr1|104459,Poptr1|105177,Poptr1|559042,Poptr1|671029,Poptr1|107863,  
Poptr1|577831,Poptr1|101053,Poptr1|63972,Poptr1|103071,Poptr1|545778,Poptr1|100688,Poptr1|97455,Poptr1|6001  
7,Poptr1|349349,Poptr1|357120,Poptr1|100952,Poptr1|75759,Poptr1|61331,Poptr1|596928,Poptr1|545790,Poptr1|101  
916,Poptr1|100852,Poptr1|55910,Poptr1|103165,Poptr1|101269,Poptr1|76018,Poptr1|106141,Poptr1|108942,Poptr1|10  
03790,Poptr1|100879,Poptr1|103182,Poptr1|107428,Poptr1|103497,Poptr1|64973,Poptr1|106152,Poptr1|106663,Poptr  
1|545145,Poptr1|107698,Poptr1|107751,Poptr1|105013,Poptr1|65374,Poptr1|663169,Poptr1|545727,Poptr1|106679,  
Poptr1|72532,Poptr1|642435,Poptr1|100853,Poptr1|348640,Poptr1|60341,Poptr1|105773,Poptr1|674981,Poptr1|3512  
67,Poptr1|64824,Poptr1|552363,Poptr1|103244,Poptr1|65755,Poptr1|57480,Poptr1|61412,Poptr1|101283,Poptr1|5734  
7,Poptr1|63929,Poptr1|97709,Poptr1|578274,Poptr1|101052,Poptr1|61521,Poptr1|674975,Poptr1|101831,Poptr1|3556  
39,Poptr1|100565,Poptr1|103801,Poptr1|71971,Poptr1|561419,Poptr1|99604,Poptr1|102209,Poptr1|677315,Poptr1|10  
3241,Poptr1|347881,Poptr1|352627,Poptr1|98067,Poptr1|681685,Poptr1|102458,Poptr1|654852,Poptr1|544962,Poptr  
1|63751,Poptr1|105897,Poptr1|103312,Poptr1|104865,Poptr1|552364,Poptr1|681694,Poptr1|105203,Poptr1|100995,Pop  
ptr1|545814,Poptr1|60206,Poptr1|98042,Poptr1|99665,Poptr1|104844,Poptr1|72353,Poptr1|352128,Poptr1|101772,P  
optr1|349546,Poptr1|349411,Poptr1|103679,Poptr1|63952,Poptr1|63963,Poptr1|99765,Poptr1|63755,Poptr1|349888,P  
optr1|101231,Poptr1|545889,Poptr1|64178,Poptr1|106532,Poptr1|64355,Poptr1|546000,Poptr1|61357,Poptr1|545789,  
Poptr1|64722,Poptr1|103072,Poptr1|103558,Poptr1|104235,Poptr1|348467,Poptr1|99432,Poptr1|545713,Poptr1|7223  
1,Poptr1|75748,Poptr1|100645,Poptr1|552361,Poptr1|107704,Poptr1|569979,Poptr1|60768,Poptr1|97919,Poptr1|5457  
56,Poptr1|98867,Poptr1|63910,Poptr1|106739,Poptr1|645042,Poptr1|554013,Poptr1|64180,Poptr1|662040,Poptr1|106  
116,Poptr1|65565,Poptr1|102969,Poptr1|654940,Poptr1|99856,Poptr1|645993,Poptr1|569768,Poptr1|75987,Poptr1|68  
1477,Poptr1|577832,Poptr1|65387,Poptr1|63984,Poptr1|102675,Poptr1|101408,Poptr1|100564,Poptr1|100590,Poptr1|  
563034,Poptr1|64748,Poptr1|103923,Poptr1|348542,Poptr1|99319,Poptr1|674995,Poptr1|545701,Poptr1|106684,Poptr  
r1|103239,Poptr1|545691,Poptr1|679748,Poptr1|573999,Poptr1|104380,Poptr1|103402,Poptr1|355888,Poptr1|100975  
Poptr1|100954,Poptr1|64046,Poptr1|674994,Poptr1|681711,Poptr1|103103,Poptr1|645798,Poptr1|349354,Poptr1|554  
001,Poptr1|71917,Poptr1|355534,Poptr1|101559,Poptr1|65917,Poptr1|65376,Poptr1|109228,Poptr1|660709,Poptr1|10  
5517,Poptr1|106302,Poptr1|98395,Poptr1|106782,Poptr1|97710,Poptr1|105738,Poptr1|103811,Poptr1|352413,Poptr1|  
101054,Poptr1|102928,Poptr1|100796,Poptr1|72262,Poptr1|106683,Poptr1|349187,Poptr1|97454,Poptr1|103800,Poptr  
r1|63909,Poptr1|352317,Poptr1|63930,Poptr1|101280,Poptr1|101584,Poptr1|72281,Poptr1|65761,Poptr1|104113,Poptr  
r1|103123,Poptr1|562921,Poptr1|105501,Poptr1|103729,Poptr1|351980,Poptr1|99863,Poptr1|546077,Poptr1|355387,  
Poptr1|98046,Poptr1|65858,Poptr1|98392,Poptr1|100724,Poptr1|98347,Poptr1|544961,Poptr1|99932,Poptr1|349221,P  
optr1|103868,Poptr1|352388,Poptr1|65783,Poptr1|105834,Poptr1|349405,Poptr1|65482,Poptr1|102951,Poptr1|10577  
8,Poptr1|349413,Poptr1|97244,Poptr1|106746,Poptr1|352059,Poptr1|75280,Poptr1|545999,Poptr1|65373,Poptr1|1016  
03,Poptr1|349410,Poptr1|349615,Poptr1|71986,Poptr1|646226,Poptr1|545968,Poptr1|106138,Poptr1|675609,Poptr1|6  
3029,Poptr1|349222,Poptr1|100348,Poptr1|654286,Poptr1|352266,Poptr1|99949,Poptr1|668782,Poptr1|63738,Poptr1|  
64879,Poptr1|352822,Poptr1|96878,Poptr1|595734,Poptr1|99404,Poptr1|672904,Poptr1|101514,Poptr1|678226,Poptr  
1|98057,Poptr1|100129,Poptr1|97849,Poptr1|349759,Poptr1|107431,Poptr1|349256,Poptr1|65154,Poptr1|105973,Pop  
tr1|100453,Poptr1|100095,Poptr1|60569,Poptr1|106242,Poptr1|106877,Poptr1|99843,Poptr1|98070,Poptr1|103441,Pop  
ptr1|100665,Poptr1|108004,Poptr1|101273,Poptr1|97066,Poptr1|99404,Poptr1|64062,Poptr1|108989,Poptr1|109011,Pop  
ptr1|107091,Poptr1|108562,Poptr1|97985,Poptr1|108279,Poptr1|105867,Poptr1|63840,Poptr1|108253,Poptr1|10592  
3,Poptr1|545666,Poptr1|98694,Poptr1|101259,Poptr1|101416,Poptr1|97250,Poptr1|99416,Poptr1|97241,Poptr1|34917  
8,Poptr1|349813,Poptr1|109057,Poptr1|101308,Poptr1|97242,Poptr1|103121,Poptr1|105712,Poptr1|104130,Poptr1|34  
8120,Poptr1|545714,Poptr1|101600,Poptr1|353993,Poptr1|348191,Poptr1|63891,Poptr1|101415,Poptr1|64297,Poptr1|  
106190,Poptr1|65143,Poptr1|104160,Poptr1|75805,Poptr1|100994,Poptr1|102634,Poptr1|545793,Poptr1|104783,Poptr  
r1|103268,Poptr1|101252,Poptr1|348639,Poptr1|104517,Poptr1|72304,Poptr1|597555,Poptr1|103095,Poptr1|702638,  
Poptr1|76064,Poptr1|102215,Poptr1|349326,Poptr1|98513,Poptr1|98511,Poptr1|348662,Poptr1|660596,Poptr1|98390,  
Poptr1|348262,Poptr1|545767,Poptr1|103633,Poptr1|63951,Poptr1|63962,Poptr1|101617,Poptr1|349552,Poptr1|9719  
4,Poptr1|102513,Poptr1|355842,Poptr1|97484,Poptr1|595420,Poptr1|96920,Poptr1|75887,Poptr1|545979,Poptr1|3523  
18,Poptr1|65647,Poptr1|357078,Poptr1|97653,Poptr1|348611,Poptr1|352095,Poptr1|65164,Poptr1|105470,Poptr1|103  
142,Poptr1|355132,Poptr1|545390,Poptr1|349438,Poptr1|76220,Poptr1|98614,Poptr1|350560,Poptr1|104690,Poptr1|6  
3973,Poptr1|350207,Poptr1|65034,Poptr1|672250,Poptr1|673585,Poptr1|678352,Poptr1|102189  
Poptr1|660708  
Poptr1|349182,Poptr1|349186,Poptr1|349185,Poptr1|101938,Poptr1|349183,Poptr1|349179,Poptr1|10193  
9,Poptr1|668362  
Poptr1|351253,Poptr1|573362,Poptr1|106374,Poptr1|577889,Poptr1|671064  
Poptr1|102780,Poptr1|99797,Poptr1|583327,Poptr1|680654  
Poptr1|101093,Poptr1|672391,Poptr1|101915,Poptr1|681695  
Poptr1|679741  
Poptr1|72156,Poptr1|660519  
Poptr1|103475,Poptr1|357073,Poptr1|100609,Poptr1|594598,Poptr1|62950,Poptr1|62961,Poptr1|62953,P  
optr1|587901,Poptr1|100750,Poptr1|680203,Poptr1|106828,Poptr1|674714  
AT3G61380,AT2G45900,AT4G00440 Poptr1|552173,Poptr1|572258  
AT5G02390 Poptr1|549176  
AT1G63670 Poptr1|548457  
Poptr1|580117,Poptr1|568400,Poptr1|674195,Poptr1|672352,Poptr1|670499  
Poptr1|672054  
Poptr1|671969,Poptr1|60995,Poptr1|97523  
AT4G02405 Poptr1|644764  
Poptr1|644860  
AT3G62360 Poptr1|644859  
AT5G23340 Poptr1|654942,Poptr1|51766  
AT5G27920 Poptr1|60617  
AT5G01720 Poptr1|560962,Poptr1|577094  
Poptr1|571866,Poptr1|702636  
Poptr1|352769  
AT1G80630 Poptr1|554851

AT2G36370  
AT3G58530 Poptr1|653456  
AT5G40470  
AT1G23840,AT1G23830,AT1G23850 Poptr1|561978  
AT1G16680 Poptr1|661155,Poptr1|674741  
AT1G79030  
AT5G49580 Poptr1|564357,Poptr1|55341  
AT4G17800 Poptr1|590005,Poptr1|580080  
AT1G76500,AT1G20900  
AT2G35270  
AT4G14465 Poptr1|566118,Poptr1|564937  
Poptr1|557689,Poptr1|64632  
AT2G42940 Poptr1|347047,Poptr1|559480  
AT3G60870,AT2G45430  
Poptr1|658099  
AT1G14490,AT5G49700 Poptr1|559014,Poptr1|347462  
AT4G35390  
AT3G04570 Poptr1|571077  
Poptr1|560007,Poptr1|346528  
Poptr1|578362  
AT3G55560 Poptr1|563929  
AT4G22810,AT4G12050 Poptr1|554259,Poptr1|63655,Poptr1|347874,Poptr1|572119  
AT4G26240 Poptr1|653331,Poptr1|679276  
AT1G68720 Poptr1|566701,Poptr1|354082  
Poptr1|665706  
AT5G49650  
Poptr1|553329,Poptr1|347527  
AT3G13226  
Poptr1|65956  
AT2G07675 Poptr1|593311  
Poptr1|673145,Poptr1|587593,Poptr1|673281  
Poptr1|594178  
Poptr1|569140,Poptr1|691890  
AT3G20390  
Poptr1|575357  
AT2G24990,AT5G37350  
AT1G23710,AT1G70420 Poptr1|578648  
AT5G62770,AT3G27880 Poptr1|573176,Poptr1|570091,Poptr1|557383,Poptr1|354508  
AT1G19790,AT1G75520 Poptr1|72987,Poptr1|550944  
Poptr1|556520  
AT5G33210,AT3G51060,AT5G66350 Poptr1|655389,Poptr1|593887  
AT2G21400  
AT3G54430 Poptr1|62894,Poptr1|350877  
AT5G12330 Poptr1|64636,Poptr1|557685  
AT4G36260,AT2G18120  
AT3G62070,AT2G46940,AT4G01670 Poptr1|348221,Poptr1|572511  
AT1G26665,AT5G41910  
Poptr1|590651,Poptr1|675302,Poptr1|586612,Poptr1|588058,Poptr1|587316,Poptr1|681773,Poptr1|68204  
1,Poptr1|675301  
AT5G02680  
AT2G40660 Poptr1|738719  
AT3G59980  
Poptr1|108209  
Poptr1|673754  
AT4G13780 Poptr1|597056,Poptr1|49256  
AT1G12520 Poptr1|646525  
AT2G16920 Poptr1|546247  
AT2G33770 Poptr1|97168,Poptr1|555800  
AT1G53020,AT3G15355 Poptr1|660931,Poptr1|670076  
Poptr1|354016,Poptr1|566845  
AT3G12775 Poptr1|581735  
Poptr1|582716  
AT1G55370 Poptr1|573911,Poptr1|573916  
Poptr1|54430  
AT2G21370 Poptr1|583579  
Poptr1|668145  
AT3G56450,AT3G56190  
Poptr1|687297,Poptr1|564097  
AT3G52230 Poptr1|725175  
AT3G15710  
Poptr1|583152,Poptr1|61206  
AT1G52600 Poptr1|640627,Poptr1|341592  
AT1G75230,AT1G19480 Poptr1|559729,Poptr1|643115  
AT3G50880 Poptr1|585454,Poptr1|655318  
Poptr1|585814  
AT3G60740 Poptr1|688117  
Poptr1|105213  
AT5G64310,AT1G35230 Poptr1|65138  
Poptr1|701411  
AT3G24420 Poptr1|717720  
AT4G37470 Poptr1|349799,Poptr1|558923  
AT3G03990 Poptr1|682882,Poptr1|681953

AT3G44090,AT3G44080,AT3G44060,AT3G42770,AT3G44810,AT2G33796,AT3G42722,AT5G25860,AT5G40050  
AT1G19070,AT1G47920  
AT3G59460 Poptr1|582746  
AT3G44180,AT1G47915  
Poptr1|571849  
AT1G06630,AT3G60040,AT2G42720,AT3G59150  
AT3G14710 Poptr1|568192  
AT1G48390,AT1G48400,AT1G64540,AT5G35995,AT2G29910,AT2G29930,AT1G21990,AT4G27050  
AT3G49150,AT3G59250,AT3G59240,AT3G59270,AT3G59180,AT5G41830,AT4G00320,AT5G41840,AT5G41630,AT4  
G14096,AT4G14103,AT1G58310,AT3G59170,AT3G59160,AT3G59200,AT3G59210,AT3G59230,AT1G56610,AT3G58  
860,AT3G58900,AT3G58910,AT3G03030,AT3G03040,AT3G58940,AT3G58930,AT3G58890,AT3G58950,AT3G58820,  
AT3G59000,AT1G52650,AT4G13960,AT5G38396,AT5G38390,AT5G38386,AT3G58880  
AT3G58870,AT5G12450,AT3G59190  
AT3G58920,AT3G58980,AT3G58960,AT3G54160,AT3G62430,AT5G15620,AT3G62440,AT4G22280  
AT5G33290 Poptr1|583680,Poptr1|58782  
AT5G25310 Poptr1|58570  
Poptr1|589546  
Poptr1|702441  
Poptr1|562348,Poptr1|562350,Poptr1|562345  
AT5G37000 Poptr1|578513  
AT5G11610  
Poptr1|75518,Poptr1|575273  
AT3G07620  
Poptr1|548149  
AT5G19670 Poptr1|669359,Poptr1|562344,Poptr1|653997  
AT5G25820 Poptr1|736995  
AT5G20260 Poptr1|560562,Poptr1|98772,Poptr1|560564,Poptr1|98771  
Poptr1|349754  
Poptr1|573137  
Poptr1|567360,Poptr1|563945  
AT5G03795 Poptr1|589547  
Poptr1|583681  
AT3G42180  
AT4G38040 Poptr1|711864,Poptr1|685245  
AT4G32790 Poptr1|561753  
AT5G11130Poptr1|578233  
AT4G16745  
Poptr1|652769,Poptr1|570189,Poptr1|554644,Poptr1|75509,Poptr1|653996  
Poptr1|682175  
AT4G02620  
AT1G03180 Poptr1|559543,Poptr1|342305  
AT2G06010 Poptr1|596279,Poptr1|589284,Poptr1|60753  
AT5G26230 Poptr1|566274,Poptr1|564815  
AT5G14600 Poptr1|702280  
AT1G56270  
Poptr1|572068,Poptr1|97898,Poptr1|351861,Poptr1|351864,Poptr1|572066,Poptr1|705371,Poptr1|669968  
AT3G21580 Poptr1|678941,Poptr1|657638  
AT1G79140 Poptr1|650939  
AT1G79150  
Poptr1|98094  
AT3G53600,AT2G37430  
Poptr1|706232,Poptr1|558107,Poptr1|563857,Poptr1|659738  
AT3G10470,AT5G04390 Poptr1|659946,Poptr1|563672  
AT2G28200 Poptr1|650539,Poptr1|745968,Poptr1|576790  
AT3G46080,AT3G46090,AT3G46070,AT5G59820,AT2G28710  
AT5G03510  
AT5G57860 Poptr1|682237  
AT2G34170,AT1G29240 Poptr1|555669,Poptr1|568706  
AT5G45850,AT4G18630  
AT2G30990 Poptr1|572850  
AT2G25770  
Poptr1|578038  
AT4G32870 Poptr1|591276,Poptr1|561736,Poptr1|108184,Poptr1|561737  
Poptr1|587379  
AT2G20050 Poptr1|669350,Poptr1|669349  
AT3G06270 Poptr1|565683,Poptr1|696269  
AT5G05240 Poptr1|574117  
AT2G40630 Poptr1|571914  
AT2G45640 Poptr1|572151,Poptr1|552094  
Poptr1|646530  
AT3G49910,AT5G67510 Poptr1|682075,Poptr1|682323,Poptr1|715963  
AT3G46220 Poptr1|49038  
AT2G27980 Poptr1|558337,Poptr1|99164  
AT2G36720 Poptr1|739611  
AT3G53680,AT2G37520 Poptr1|589518,Poptr1|583008,Poptr1|590716,Poptr1|650404,Poptr1|351751  
AT4G16570 Poptr1|356461,Poptr1|553867  
AT3G15110Poptr1|568630  
AT5G17840 Poptr1|702459  
Poptr1|569897,Poptr1|100323  
AT5G08110Poptr1|569898,Poptr1|61275,Poptr1|100315  
AT3G63160,AT3G52420  
Poptr1|677301,Poptr1|76230,Poptr1|581921,Poptr1|548780,Poptr1|565518,Poptr1|552979,Poptr1|591438,

Poptr1|651735,Poptr1|643327  
 AT1G15415,AT1G52680 Poptr1|640638  
 AT1G50400,AT3G20000 Poptr1|593101,Poptr1|730689,Poptr1|563402  
 AT5G52810 Poptr1|556114  
 Poptr1|579591  
 AT4G04330 Poptr1|727483  
 AT4G10170,AT1G33480 Poptr1|646001,Poptr1|730429  
 AT5G55510,AT4G26670 Poptr1|568535,Poptr1|707606  
 AT3G53910  
 Poptr1|585870,Poptr1|555706,Poptr1|568741  
 AT1G53240,AT3G15020 Poptr1|596303  
 AT2G22780 Poptr1|686130  
 Poptr1|707785,Poptr1|728086  
 Poptr1|690460,Poptr1|583880,Poptr1|98858  
 AT5G09660 Poptr1|65339,Poptr1|649749  
 AT3G47520  
 AT2G30080 Poptr1|49109  
 AT4G33020  
 AT1G60960,AT1G10970 Poptr1|736888  
 AT2G32270,AT1G05300  
 Poptr1|586744  
 AT5G62160  
 AT5G45105,AT4G19690,AT4G19680  
 AT3G12750 Poptr1|560115,Poptr1|343996,Poptr1|560118,Poptr1|564168,Poptr1|689436  
 AT2G04032 Poptr1|354102,Poptr1|566719  
 AT1G31260 Poptr1|107742,Poptr1|57732  
 AT1G21280  
 Poptr1|76370,Poptr1|105450,Poptr1|353327,Poptr1|578443,Poptr1|578143,Poptr1|545764,Poptr1|574980,  
 Poptr1|107013,Poptr1|587828,Poptr1|595927,Poptr1|102439,Poptr1|570190,Poptr1|583837,Poptr1|76160,Poptr1|591  
 044,Poptr1|591137,Poptr1|593417,Poptr1|596905,Poptr1|571452,Poptr1|568788,Poptr1|544973,Poptr1|587265,Poptr  
 1|575153,Poptr1|64525,Poptr1|580335,Poptr1|558402,Poptr1|573527,Poptr1|562357,Poptr1|579813,Poptr1|347904,P  
 optr1|589176,Poptr1|106240,Poptr1|106527,Poptr1|590912,Poptr1|590332,Poptr1|563382,Poptr1|108535,Poptr1|103  
 296,Poptr1|579848,Poptr1|583255,Poptr1|588330,Poptr1|597660,Poptr1|571930,Poptr1|565551,Poptr1|596078,Poptr  
 1|349860,Poptr1|573994,Poptr1|348121,Poptr1|349659,Poptr1|75940,Poptr1|584559,Poptr1|588897,Poptr1|582920,P  
 optr1|574143,Poptr1|565699,Poptr1|582504,Poptr1|545065,Poptr1|589882,Poptr1|348569,Poptr1|105817,Poptr1|550  
 426,Poptr1|71856,Poptr1|552857,Poptr1|98937,Poptr1|595733,Poptr1|592425,Poptr1|351191,Poptr1|595882,Poptr1|6  
 2660,Poptr1|66004,Poptr1|102563,Poptr1|579827,Poptr1|557912,Poptr1|354812,Poptr1|109272,Poptr1|106857,Poptr  
 1|581221,Poptr1|544922,Poptr1|65585,Poptr1|594302,Poptr1|552795,Poptr1|103572,Poptr1|591002,Poptr1|597718,P  
 optr1|591062,Poptr1|105436,Poptr1|594673,Poptr1|591084,Poptr1|591115,Poptr1|585590,Poptr1|569960,Poptr1|5936  
 18,Poptr1|65084,Poptr1|583996  
 AT1G49810  
 AT3G19490 Poptr1|54522,Poptr1|549940  
 AT1G73590 Poptr1|699525,Poptr1|575003  
 AT1G23080,AT1G70940,AT2G01420 Poptr1|345301,Poptr1|726892  
 Poptr1|48867  
 AT5G16530 Poptr1|574049,Poptr1|689942  
 AT5G15100 Poptr1|58367,Poptr1|545911  
 AT5G57090 Poptr1|58808  
 Poptr1|560374,Poptr1|701309  
 Poptr1|106029  
 AT1G77110Poptr1|342377,Poptr1|52012  
 Poptr1|590578  
 AT3G24506,AT2G17240  
 Poptr1|702122  
 AT4G27840,AT5G52990 Poptr1|661534,Poptr1|574739  
 AT3G06780 Poptr1|565520,Poptr1|596093  
 AT1G76090  
 AT1G20330 Poptr1|559888,Poptr1|710962  
 AT1G48580 Poptr1|355487

A-R OGs in tree approach

ArabidopsisRice  
 AT2G42220 Orysa4|Os09g10750.1  
 AT2G22900,AT4G37690 Orysa4|Os02g49140.1  
 Orysa4|Os03g19330.1,Orysa4|Os03g19310.1  
 AT5G07720,AT1G18690,AT1G74380 Orysa4|Os12g05380.1,Orysa4|Os02g32750.1  
 AT3G62720,AT4G02500 Orysa4|Os03g18820.1  
 AT4G38310  
 AT3G60590 Orysa4|Os04g45200.1  
 AT2G33550 Orysa4|Os02g31160.1,Orysa4|Os04g32590.1  
 Orysa4|Os01g70230.1  
 Orysa4|Os03g49890.1,Orysa4|Os02g07800.1  
 AT5G45900 Orysa4|Os01g42850.1  
 AT2G38890,AT3G53320,AT2G37070 Orysa4|Os05g03060.1  
 AT4G10030 Orysa4|Os01g66240.1  
 AT3G04490 Orysa4|Os10g33710.1  
 AT4G18940,AT4G18930 Orysa4|Os05g44170.1  
 AT1G20620  
 AT1G20630,AT4G35090 Orysa4|Os03g03910.1,Orysa4|Os06g51150.1  
 Orysa4|Os02g02400.1  
 AT2G27900  
 Orysa4|Os10g39910.1

AT5G46070  
AT1G03830 Orysa4|Os05g48860.1,Orysa4|Os02g20410.1  
AT2G31490 Orysa4|Os01g53140.1  
AT5G42070 Orysa4|Os01g13390.1  
Orysa4|Os03g50940.1  
AT1G02410 Orysa4|Os12g32180.1  
AT3G12180  
AT1G12340,AT1G12390,AT1G62880,AT4G12090 Orysa4|Os06g04500.1  
AT1G17470,AT1G72660  
Orysa4|Os05g28940.1  
AT4G39520 Orysa4|Os07g43470.1  
AT1G27750 Orysa4|Os03g10750.1  
Orysa4|Os08g01770.1  
AT5G47840  
AT5G35170 Orysa4|Os08g19140.1  
AT1G48560,AT3G05430,AT5G27650 Orysa4|Os05g05660.1  
AT3G49890 Orysa4|Os03g10410.1  
AT1G44180,AT1G44820 Orysa4|Os06g10770.1  
AT4G38220 Orysa4|Os08g40110.1  
Orysa4|Os01g40610.1  
AT2G32050,AT3G43250 Orysa4|Os01g40600.1  
AT1G17130  
AT1G68440,AT1G25400 Orysa4|Os09g13920.1  
Orysa4|Os01g61480.1  
AT5G67060,AT3G50330 Orysa4|Os09g28210.1,Orysa4|Os08g36740.1  
AT5G09750 Orysa4|Os08g01700.1  
Orysa4|Os01g38610.1,Orysa4|Os05g46370.1  
Orysa4|Os06g10820.1  
AT3G21330  
AT4G00120  
AT2G40510,AT2G40590,AT3G56340 Orysa4|Os05g39960.1,Orysa4|Os01g60790.1  
AT5G46380 Orysa4|Os01g47430.1,Orysa4|Os05g49180.1  
AT1G29370,AT1G29350,AT4G18150  
AT1G54390  
AT3G24010  
Orysa4|Os03g53700.1  
Orysa4|Os09g25450.1  
Orysa4|Os12g15250.1  
AT3G19790  
AT4G22450 Orysa4|Os04g16940.1,Orysa4|Os12g10550.1  
AT1G16020,AT1G80910 Orysa4|Os08g33076.1  
AT3G50610,AT1G59835 Orysa4|Os03g27680.1  
AT1G60930,AT1G10930  
AT1G27880 Orysa4|Os04g40970.1  
AT3G05740 Orysa4|Os11g44910.1  
AT4G35740 Orysa4|Os02g54020.1  
Orysa4|Os07g48360.1  
Orysa4|Os04g35420.1  
Orysa4|Os08g24360.1  
AT1G31360 Orysa4|Os11g48090.1  
Orysa4|Os05g02740.1  
AT2G35736  
Orysa4|Os05g34770.1  
AT1G22840,AT4G10040  
AT1G17820,AT1G73200 Orysa4|Os02g58110.1  
AT3G47833,AT5G62575 Orysa4|Os09g21470.1  
AT3G62110,Orysa4|Os03g61800.1,Orysa4|Os07g14160.1  
AT3G61490,AT4G23500,AT2G23900,AT3G48950 Orysa4|Os03g03350.1  
AT3G06770,AT5G49215,AT3G16850 Orysa4|Os12g36810.1,Orysa4|Os11g43750.1  
AT4G33440 Orysa4|Os08g01600.1  
AT3G42950,AT1G19170 Orysa4|Os09g26800.1  
Orysa4|Os02g54030.1  
AT4G23820,AT5G41870 Orysa4|Os01g43160.1,Orysa4|Os05g50960.1,Orysa4|Os02g15690.1  
AT5G04600 Orysa4|Os08g31810.1  
AT3G43910,AT3G43900,AT2G26840 Orysa4|Os01g16340.1  
AT3G08670,AT3G51540 Orysa4|Os02g38310.1,Orysa4|Os05g25220.1,Orysa4|Os05g40220.1  
AT2G17200,AT2G17190 Orysa4|Os03g03920.1  
AT2G24580 Orysa4|Os09g32290.1,Orysa4|Os12g35890.1,Orysa4|Os01g21380.1  
Orysa4|Os07g28790.1  
AT1G51110  
AT5G42690,AT4G37080 Orysa4|Os09g28850.1  
AT1G64520,AT5G42040 Orysa4|Os07g25420.1  
AT3G22630,AT4G14800 Orysa4|Os03g48930.1  
AT1G15810,AT1G80620  
Orysa4|Os06g07896.1,Orysa4|Os06g07996.1,Orysa4|Os02g55940.1,Orysa4|Os03g18270.1  
AT4G11130,Orysa4|Os04g39160.1  
AT1G14790  
Orysa4|Os02g50330.1  
AT2G05370,AT3G49500 Orysa4|Os01g34350.1  
AT5G10070 Orysa4|Os03g09920.1

AT3G62010 Orysa4|Os03g38970.1  
AT1G08580 Orysa4|Os02g39180.1  
AT2G27840 Orysa4|Os11g08500.1,Orysa4|Os01g68104.1,Orysa4|Os05g51830.1,Orysa4|Os01g68160.1  
AT3G44750,AT5G22650 Orysa4|Os05g51840.1  
AT5G03740 Orysa4|Os02g33450.1  
AT3G11630,AT5G06290 Orysa4|Os04g33970.1  
AT2G37870 Orysa4|Os01g62980.1  
AT3G53980,AT5G05960 Orysa4|Os05g06780.1,Orysa4|Os04g33920.1,Orysa4|Os04g33930.1  
AT5G38510 Orysa4|Os02g22100.1  
Orysa4|Os01g66580.1  
AT5G09380  
AT4G25180 Orysa4|Os04g32350.1  
AT5G23430,AT5G08390 Orysa4|Os04g58130.1  
Orysa4|Os10g35200.1  
AT1G11160,AT1G61210 Orysa4|Os01g57210.1  
AT1G35680 Orysa4|Os02g15900.1  
AT4G30930 Orysa4|Os05g48410.1  
Orysa4|Os03g38700.1,Orysa4|Os09g14570.1  
AT1G24360  
AT2G29260  
AT5G06060 Orysa4|Os03g16210.1,Orysa4|Os03g16220.1,Orysa4|Os03g16230.1  
Orysa4|Os11g25110.1  
AT2G29170,AT2G29150,AT2G29370,AT2G29360,AT2G29290,AT2G29350,AT2G29320,AT2G29300,AT2G29310,AT2G29340,AT2G29330,AT2G30670,AT1G07450,AT1G07440  
Orysa4|Os04g52400.1  
Orysa4|Os11g25100.1  
Orysa4|Os11g25170.1,Orysa4|Os11g25700.1,Orysa4|Os04g22730.1,Orysa4|Os11g25220.1,Orysa4|Os11g25230.1,Orysa4|Os04g20070.1,Orysa4|Os11g43200.1  
AT4G05530  
AT5G01300 Orysa4|Os05g39250.1  
AT2G38480 Orysa4|Os03g18680.1,Orysa4|Os07g49200.1,Orysa4|Os03g60250.1,Orysa4|Os05g27790.1  
AT3G57370  
AT3G29380,AT4G10680,AT5G39230 Orysa4|Os05g47480.1,Orysa4|Os03g09820.1,Orysa4|Os07g32120.1,Orysa4|Os07g32080.1  
AT3G10330,AT2G41630 Orysa4|Os09g36440.1  
AT5G58200 Orysa4|Os06g08390.1  
AT1G16740 Orysa4|Os05g45220.1,Orysa4|Os01g53280.1  
AT1G30130 Orysa4|Os07g05870.1  
AT4G10360 Orysa4|Os05g40700.1,Orysa4|Os01g60120.1  
AT4G19645,AT1G31300 Orysa4|Os01g56230.1,Orysa4|Os05g43540.1  
AT1G24530 Orysa4|Os06g13140.1,Orysa4|Os02g50740.1,Orysa4|Os04g40560.1  
AT3G51930 Orysa4|Os01g71780.1  
AT5G50120,AT1G24130  
AT2G26490,AT1G47610 Orysa4|Os03g52870.1  
Orysa4|Os03g42710.1,Orysa4|Os12g40260.1  
AT3G50390 Orysa4|Os01g13140.1  
AT3G18950,AT1G49450,AT4G34380  
AT1G06720 Orysa4|Os03g21530.1  
AT4G34260 Orysa4|Os10g19334.1,Orysa4|Os10g19880.1  
AT4G13750 Orysa4|Os03g58910.1  
AT3G22640 Orysa4|Os08g15430.1,Orysa4|Os03g46100.1,Orysa4|Os11g34780.1,Orysa4|Os03g57960.1,Orysa4|Os11g37270.1  
Orysa4|Os06g30380.1  
AT3G57180 Orysa4|Os05g03380.1  
AT4G10620 Orysa4|Os09g19980.1  
Orysa4|Os08g42080.1  
AT1G69040,AT2G03730 Orysa4|Os03g29980.1  
Orysa4|Os03g14370.1  
AT5G25320 Orysa4|Os03g47246.1  
AT1G12420,AT4G22780  
AT3G01990 Orysa4|Os08g42100.1,Orysa4|Os04g32110.1  
AT1G76990 Orysa4|Os02g34990.1  
Orysa4|Os08g02500.1  
AT5G65890 Orysa4|Os03g51990.1  
AT5G50680,AT5G50580,AT4G24940 Orysa4|Os11g30410.1  
AT3G52610 Orysa4|Os01g64256.1  
AT3G49055 Orysa4|Os08g44550.1  
AT1G24560 Orysa4|Os09g39200.1  
AT1G06470 Orysa4|Os01g54580.1  
AT4G10970,AT4G23910 Orysa4|Os08g28690.1  
AT2G25760 Orysa4|Os01g10150.1,Orysa4|Os05g11140.1,Orysa4|Os01g54100.1  
Orysa4|Os03g57940.1  
AT3G13670  
AT3G03940,AT5G18190,AT3G03930 Orysa4|Os01g56580.1  
Orysa4|Os10g26010.1,Orysa4|Os10g25950.1,Orysa4|Os10g25930.1,Orysa4|Os06g13450.1,Orysa4|Os10

g25940.1  
AT3G01120,AT1G33320 Orysa4|Os03g25940.1  
Orysa4|Os06g07960.1,Orysa4|Os06g07860.1  
AT3G57050  
AT1G70180 Orysa4|Os04g39090.1  
Orysa4|Os07g30820.1  
AT1G67325 Orysa4|Os08g41010.1  
AT4G35987  
AT4G35990 Orysa4|Os03g14020.1  
AT4G18590,AT3G52630 Orysa4|Os01g14980.1  
AT1G74160,AT1G18620,AT3G02170,AT5G15580 Orysa4|Os03g30530.1,Orysa4|Os07g01860.1  
AT1G78120  
AT3G14950,AT1G53300,AT3G58620,AT2G42580 Orysa4|Os05g50990.1,Orysa4|Os05g11990.1  
AT5G10090,AT5G65160 Orysa4|Os02g51730.1  
AT2G41760 Orysa4|Os05g32190.1  
AT1G17680 Orysa4|Os11g16540.1  
AT2G41835,AT3G57480  
Orysa4|Os07g38240.1  
AT5G48205  
AT3G28210 Orysa4|Os09g21710.1  
AT1G62020,AT2G21390 Orysa4|Os03g50350.1,Orysa4|Os03g50340.1,Orysa4|Os09g04110.1  
AT5G16810 Orysa4|Os02g46750.1  
AT5G24260 Orysa4|Os02g18850.1  
AT5G59440 Orysa4|Os07g44630.1  
AT4G35980 Orysa4|Os05g28480.1  
AT2G38070,AT5G01170,AT3G09070 Orysa4|Os01g63310.1,Orysa4|Os05g37800.1,Orysa4|Os11g48050.1  
AT5G58930,AT3G46990 Orysa4|Os03g05460.1  
AT4G23570,AT4G11260 Orysa4|Os01g32930.1,Orysa4|Os01g43540.1  
AT4G36100  
AT1G53380,AT3G14870  
AT4G34080,AT2G45260,AT4G33320 Orysa4|Os10g23220.1  
Orysa4|Os11g14490.1,Orysa4|Os05g11650.1,Orysa4|Os01g10680.1  
Orysa4|Os02g42630.1  
AT2G32130  
AT2G30380 Orysa4|Os01g60850.1  
AT5G58960  
AT3G60680 Orysa4|Os10g36400.1  
AT1G29300  
AT3G17365 Orysa4|Os08g40580.1  
AT3G60910 Orysa4|Os07g46340.1,Orysa4|Os05g32590.1  
AT2G35850,AT3G52360 Orysa4|Os12g42670.1  
AT1G79990,AT3G15980,AT1G52360 Orysa4|Os02g11840.1,Orysa4|Os02g11830.1,Orysa4|Os06g05180.1  
AT1G69390 Orysa4|Os12g31450.1  
AT1G24320,AT1G67490 Orysa4|Os01g69210.1  
AT4G01750,AT4G01770,AT1G56550,AT4G01220 Orysa4|Os05g32120.1  
AT4G17050 Orysa4|Os07g31270.1  
AT1G61140,AT1G11100  
Orysa4|Os01g57110.1  
AT5G22750  
AT3G20010,AT1G50410,AT3G16600 Orysa4|Os08g08220.1  
AT5G43530 Orysa4|Os04g09800.1  
AT1G05120,AT1G02670 Orysa4|Os07g32730.1  
Orysa4|Os07g44800.1  
AT2G01650 Orysa4|Os03g43570.1  
AT4G22050 Orysa4|Os12g16280.1,Orysa4|Os11g13500.1  
AT1G69100  
AT1G11910,AT1G62290,AT4G04460 Orysa4|Os01g47410.1,Orysa4|Os05g49200.1  
Orysa4|Os01g44130.1  
Orysa4|Os11g01360.1,Orysa4|Os05g04630.1,Orysa4|Os01g18630.1  
AT1G25290  
Orysa4|Os09g28100.1  
AT3G59500,AT1G30890 Orysa4|Os04g08320.1  
Orysa4|Os11g06770.1  
AT5G25190 Orysa4|Os06g08340.1,Orysa4|Os02g55380.1  
AT5G19790 Orysa4|Os07g10410.1  
Orysa4|Os01g73770.1  
AT2G20880  
AT2G23340,AT4G36900,AT3G50260,AT5G67190,AT4G06746  
AT5G25810,AT5G11590,AT2G25820,AT4G32800,AT1G77200  
AT1G19210,AT1G74930,AT5G21960  
Orysa4|Os07g42510.1  
AT1G36060,AT1G71130  
AT4G23750,AT4G11140  
AT5G51190  
AT3G16770  
Orysa4|Os05g28350.1  
Orysa4|Os06g10780.1  
AT5G44210  
Orysa4|Os08g31580.1,Orysa4|Os09g20350.1,Orysa4|Os06g11860.1,Orysa4|Os02g51670.1,Orysa4|Os03  
g09170.1  
AT1G28360  
AT2G47520

AT2G44940,AT3G60490  
Orysa4|Os04g46220.1,Orysa4|Os02g43790.1  
AT1G15360  
Orysa4|Os03g08460.1  
AT1G28370 Orysa4|Os02g52670.1  
Orysa4|Os10g22600.1  
AT4G17500,AT5G47220  
Orysa4|Os12g41060.1  
AT1G78080,AT1G22190  
Orysa4|Os04g46440.1,Orysa4|Os02g43970.1,Orysa4|Os04g46410.1  
AT1G71450,AT1G33760  
AT2G20350,AT5G67010,AT5G67000,AT1G12890  
Orysa4|Os05g25260.1  
Orysa4|Os04g56150.1  
Orysa4|Os04g46240.1,Orysa4|Os04g46250.1,Orysa4|Os02g43820.1  
AT2G36450  
AT1G03800 Orysa4|Os08g42550.1  
AT3G16280  
AT4G39780,AT2G22200,AT5G65130  
AT1G64380 Orysa4|Os05g49700.1  
Orysa4|Os10g25170.1  
Orysa4|Os04g32620.1,Orysa4|Os02g32140.1  
Orysa4|Os04g55520.1  
AT3G25890,AT1G25470,AT1G68550 Orysa4|Os09g13940.1  
AT5G53290,AT4G27950  
Orysa4|Os03g64260.1  
Orysa4|Os01g04020.1  
AT1G49120  
Orysa4|Os02g54160.1,Orysa4|Os06g09390.1,Orysa4|Os09g26420.1  
AT4G28140  
Orysa4|Os01g21120.1  
Orysa4|Os06g42910.1,Orysa4|Os09g16070.1  
AT1G22810,AT1G71520 Orysa4|Os05g34730.1,Orysa4|Os01g66270.1  
Orysa4|Os05g39590.1  
Orysa4|Os03g08470.1  
Orysa4|Os10g38000.1  
AT5G18560 Orysa4|Os08g07700.1  
Orysa4|Os06g07030.1  
AT3G15210,AT1G53170,AT1G43160  
AT2G38340  
AT5G25390,AT5G11190  
Orysa4|Os02g35240.1,Orysa4|Os04g36640.1  
AT2G40350,AT2G40340,AT5G05410,AT3G11020  
Orysa4|Os10g41330.1  
AT4G31060,AT1G01250  
AT4G13620  
AT2G33710  
Orysa4|Os07g47330.1  
AT3G61630,AT2G46310  
AT5G43410,AT1G04370  
AT1G72360  
AT1G46768  
Orysa4|Os08g27220.1  
Orysa4|Os05g36100.1  
AT5G64750  
AT3G20310,AT1G50640,AT5G61590,AT5G07580 Orysa4|Os04g57340.1  
Orysa4|Os12g41030.1  
Orysa4|Os01g64790.1  
AT3G23220 Orysa4|Os01g54890.1  
AT5G61600 Orysa4|Os05g41760.1  
Orysa4|Os05g27930.1  
AT5G18450  
AT1G28160  
AT1G24590  
AT4G18450  
Orysa4|Os05g41780.1,Orysa4|Os01g58420.1  
Orysa4|Os06g09790.1,Orysa4|Os06g09760.1,Orysa4|Os06g09810.1,Orysa4|Os06g11940.1,Orysa4|Os06  
g09717.1  
Orysa4|Os04g52090.1  
Orysa4|Os01g10370.1,Orysa4|Os02g13710.1  
AT4G25470,AT4G25480,AT4G25490,AT5G51990,AT1G63030,AT1G12610  
Orysa4|Os06g03670.1,Orysa4|Os04g48350.1  
Orysa4|Os12g39330.1  
AT5G13910  
AT5G50080  
Orysa4|Os12g40960.1  
Orysa4|Os09g28440.1  
Orysa4|Os09g11480.1,Orysa4|Os09g11460.1,Orysa4|Os04g18650.1,Orysa4|Os03g05590.1  
AT2G31230,AT1G06160 Orysa4|Os07g22730.1,Orysa4|Os07g22770.1,Orysa4|Os09g39850.1  
AT3G23230 Orysa4|Os03g60120.1  
Orysa4|Os08g45110.1  
Orysa4|Os10g30840.1



Orysa4|Os02g10760.1,Orysa4|Os06g40150.1  
AT3G23240  
Orysa4|Os04g28074.1  
Orysa4|Os07g12510.1  
Orysa4|Os02g06330.1,Orysa4|Os06g47590.1  
AT1G80580  
AT1G77640,AT1G21910,AT1G44830  
AT2G35700,AT4G16750 Orysa4|Os04g46400.1  
AT1G12980  
Orysa4|Os10g41130.1  
Orysa4|Os05g49010.1  
Orysa4|Os02g32040.1,Orysa4|Os04g32790.1  
AT1G53910,AT3G14230  
Orysa4|Os08g41030.1  
AT1G12630,AT5G52020 Orysa4|Os04g48330.1,Orysa4|Os02g45420.1  
AT1G75490  
Orysa4|Os06g23050.1  
AT4G34410  
Orysa4|Os01g46870.1,Orysa4|Os06g06540.1,Orysa4|Os01g12440.1  
Orysa4|Os03g08500.1,Orysa4|Os03g08490.1  
AT5G07310,AT5G61890,AT1G22985,AT5G13330  
AT2G40220  
Orysa4|Os01g07120.1  
AT4G17490,AT5G47230  
Orysa4|Os02g38090.1  
Orysa4|Os08g35240.1  
Orysa4|Os06g42990.1  
Orysa4|Os06g06970.1,Orysa4|Os08g43200.1,Orysa4|Os08g43210.1,Orysa4|Os09g35010.1,Orysa4|Os09  
g35020.1  
AT2G44840 Orysa4|Os02g09650.1  
AT3G57600  
Orysa4|Os04g34970.1,Orysa4|Os05g29810.1,Orysa4|Os02g34260.1,Orysa4|Os02g34270.1  
Orysa4|Os11g42510.1  
AT5G36160 Orysa4|Os02g19924.1  
AT5G53970 Orysa4|Os06g23684.1,Orysa4|Os02g20360.1,Orysa4|Os02g19970.1,Orysa4|Os11g35040.1  
AT4G28420,AT2G20610,AT4G28410,AT2G24850,AT4G23600,AT4G23590  
AT5G22320 Orysa4|Os01g73560.1  
Orysa4|Os03g09270.1  
AT3G49600 Orysa4|Os03g09260.1  
AT5G60750  
Orysa4|Os06g30910.1  
AT2G47510,AT5G50950 Orysa4|Os03g21950.1  
AT4G34460  
Orysa4|Os03g46650.1  
AT2G47770 Orysa4|Os05g05930.1  
AT4G10290,AT4G10280  
AT4G10300  
AT4G28703,AT3G04300 Orysa4|Os04g43060.1,Orysa4|Os02g40700.1  
Orysa4|Os04g36760.1  
Orysa4|Os10g32840.1  
AT1G42440 Orysa4|Os11g19250.1  
Orysa4|Os03g26460.1  
AT3G03773 Orysa4|Os03g45270.1  
AT4G02450 Orysa4|Os08g27070.1  
AT5G52220 Orysa4|Os09g12780.1  
Orysa4|Os04g22800.1  
AT1G04635 Orysa4|Os04g22870.1  
AT1G67730  
Orysa4|Os04g40730.1,Orysa4|Os02g38440.1,Orysa4|Os06g19530.1,Orysa4|Os06g19550.1,Orysa4|Os06  
g19540.1,Orysa4|Os06g19500.1,Orysa4|Os06g19590.1,Orysa4|Os06g19610.1,Orysa4|Os04g02620.1  
AT1G24470  
AT5G51080,AT3G01410 Orysa4|Os08g08050.1  
Orysa4|Os10g32060.1  
Orysa4|Os06g13010.1  
AT1G24090  
AT5G16610 Orysa4|Os03g12120.1  
AT2G21290 Orysa4|Os09g35900.1  
AT3G15430 Orysa4|Os07g27490.1  
AT5G48330 Orysa4|Os02g10380.1  
AT3G47660  
AT1G76950,AT5G42140 Orysa4|Os05g01610.1,Orysa4|Os01g73410.1  
AT1G65920 Orysa4|Os04g49430.1,Orysa4|Os02g45980.1  
Orysa4|Os12g18650.1  
AT1G27060 Orysa4|Os01g56990.1  
AT3G02510,AT5G16040 Orysa4|Os08g33390.1  
Orysa4|Os02g38350.1  
Orysa4|Os04g58960.1  
AT3G26100  
AT5G19420,AT5G12350 Orysa4|Os01g72320.1,Orysa4|Os05g31920.1  
AT5G08710 Orysa4|Os11g34320.1  
AT3G23270,AT4G14370 Orysa4|Os05g46740.1,Orysa4|Os01g50470.1  
AT1G69710

AT5G63860 Orysa4|Os02g34860.1,Orysa4|Os04g35570.1  
AT3G02300 Orysa4|Os03g40260.1  
AT5G60870  
AT3G20320 Orysa4|Os01g74280.1  
AT2G31220,AT1G06170,AT2G31210,AT2G31215 Orysa4|Os01g18870.1,Orysa4|Os04g51070.1  
AT1G48030,AT3G17240 Orysa4|Os03g45990.1,Orysa4|Os05g06750.1  
Orysa4|Os12g10850.1  
Orysa4|Os12g10910.1  
Orysa4|Os12g10830.1  
AT4G12740  
AT4G21320 Orysa4|Os06g46900.1  
Orysa4|Os10g32570.1,Orysa4|Os03g04960.1  
AT3G56300,AT5G38830  
AT2G31170Orysa4|Os09g38420.1  
Orysa4|Os05g24690.1  
AT2G48110,AT3G23590 Orysa4|Os07g11000.1  
Orysa4|Os05g24700.1,Orysa4|Os07g48350.1  
Orysa4|Os02g02980.1  
AT2G21340,AT4G39030  
AT5G02770 Orysa4|Os03g17490.1  
AT3G19670  
AT1G44910 Orysa4|Os01g34780.1  
AT5G58740 Orysa4|Os01g47770.1  
AT2G04620 Orysa4|Os08g32650.1  
AT3G45050 Orysa4|Os06g51470.1  
Orysa4|Os02g45570.1,Orysa4|Os04g48510.1  
Orysa4|Os07g28430.1  
AT4G37740,AT2G22840 Orysa4|Os03g51970.1  
Orysa4|Os02g47280.1  
AT2G06200 Orysa4|Os03g47140.1  
Orysa4|Os11g35030.1,Orysa4|Os12g29980.1  
AT4G24150,AT5G53660  
Orysa4|Os06g10310.1  
AT2G36400  
AT2G45480  
AT1G34780,AT4G08930 Orysa4|Os02g51850.1  
AT5G06160  
Orysa4|Os03g50850.1  
AT4G28310,AT1G52270 Orysa4|Os06g02530.1  
Orysa4|Os02g54830.1  
Orysa4|Os06g08820.1  
Orysa4|Os09g20980.1,Orysa4|Os06g07100.1  
AT3G61460,AT1G63840,AT4G11360  
AT3G60220  
Orysa4|Os08g34550.1  
AT5G40250,AT1G23980 Orysa4|Os06g12680.1,Orysa4|Os02g50930.1  
AT5G46650  
AT2G18650,AT4G30400,AT5G57750  
AT1G72220  
AT4G20150 Orysa4|Os07g31490.1  
AT5G01580 Orysa4|Os01g61240.1  
AT1G07080  
AT4G12870,AT4G12900,AT4G12890,AT4G12960  
AT1G35220 Orysa4|Os01g19760.1  
AT4G11570Orysa4|Os04g47020.1  
Orysa4|Os09g39560.1  
AT1G10720 Orysa4|Os03g52000.1  
AT3G49800,AT5G65910  
Orysa4|Os11g35320.1  
Orysa4|Os05g43520.1,Orysa4|Os01g56100.1  
AT2G10950 Orysa4|Os06g07820.1  
AT3G06180 Orysa4|Os05g32670.1  
AT1G11110,AT4G09300  
Orysa4|Os03g13220.1  
AT1G61150  
AT5G20200 Orysa4|Os06g40460.1  
AT3G48180,AT1G19020 Orysa4|Os02g50710.1,Orysa4|Os06g13190.1  
AT1G63810 Orysa4|Os12g06910.1  
AT1G03260 Orysa4|Os07g46220.1  
AT5G19070  
AT3G18380  
AT1G15215 Orysa4|Os09g17770.1  
Orysa4|Os06g28880.1,Orysa4|Os06g29020.1  
AT5G18180,AT3G03920 Orysa4|Os11g37080.1  
AT3G17790,AT2G01890,AT1G14700,AT1G25230,AT2G01880  
Orysa4|Os10g02750.1,Orysa4|Os03g13540.1,Orysa4|Os11g34710.1,Orysa4|Os11g34720.1  
AT3G62810 Orysa4|Os05g30030.1  
AT2G45440,AT3G60880 Orysa4|Os04g48540.1,Orysa4|Os04g18200.1  
AT3G02600 Orysa4|Os01g04660.1  
AT2G01180  
AT1G15080,AT3G18220  
Orysa4|Os08g27030.1,Orysa4|Os08g27040.1,Orysa4|Os09g13870.1,Orysa4|Os01g47580.1,Orysa4|Os01

g49820.1,Orysa4|Os05g47660.1  
AT3G10680 Orysa4|Os03g45330.1,Orysa4|Os10g30180.1  
AT5G20970,AT2G27140 Orysa4|Os03g06170.1,Orysa4|Os03g45340.1  
AT1G54400,AT5G04890  
Orysa4|Os01g40530.1,Orysa4|Os01g40550.1,Orysa4|Os05g51440.1  
AT2G32910 Orysa4|Os06g12260.1  
Orysa4|Os06g07770.1  
AT5G61910 Orysa4|Os11g32270.1  
AT4G36650 Orysa4|Os03g10070.1  
AT5G58920 Orysa4|Os01g26020.1  
AT1G61700,AT1G11475 Orysa4|Os12g07980.1,Orysa4|Os11g08940.1  
AT3G27530 Orysa4|Os12g35360.1  
AT3G49460,AT5G24510,AT5G47700,AT1G01100,AT4G00810 Orysa4|Os08g02340.1  
AT5G17410 Orysa4|Os04g42330.1  
AT3G15351 Orysa4|Os07g30220.1  
Orysa4|Os01g43450.1,Orysa4|Os02g56710.1  
AT2G21500,AT4G39140  
AT1G19680,AT1G75400 Orysa4|Os01g15630.1  
AT3G23980 Orysa4|Os01g68380.1  
AT3G53580 Orysa4|Os12g37960.1  
AT1G15140 Orysa4|Os02g22260.1  
Orysa4|Os01g03050.1  
AT2G41040 Orysa4|Os06g43800.1  
AT1G78140 Orysa4|Os08g31750.1  
AT2G12280,AT2G12200,AT1G50480 Orysa4|Os09g27420.1  
Orysa4|Os11g18830.1  
AT2G42510,AT1G54380  
AT4G04940 Orysa4|Os06g43690.1  
AT1G73780,AT1G48750,AT3G18280 Orysa4|Os05g47730.1,Orysa4|Os05g47700.1,Orysa4|Os01g49650.1  
AT5G38195,AT5G38180,AT1G66850,AT1G43667,AT2G14846,AT3G57310,AT1G43665,AT1G43666,AT5G38170,AT5  
G38160,AT3G12545,AT1G64235  
Orysa4|Os10g36090.1,Orysa4|Os10g36070.1,Orysa4|Os10g36110.1,Orysa4|Os10g36160.1,Orysa4|Os10  
g36170.1,Orysa4|Os03g02050.1,Orysa4|Os11g40530.1,Orysa4|Os06g49190.1,Orysa4|Os01g49640.1  
AT2G20930 Orysa4|Os09g36976.1  
Orysa4|Os07g48790.1,Orysa4|Os03g20340.1  
AT2G28060  
AT4G16360  
AT5G21170Orysa4|Os05g41220.1  
AT1G70190,AT2G03130 Orysa4|Os03g52400.1  
AT3G06040 Orysa4|Os02g10540.1  
AT4G36420 Orysa4|Os05g48050.1  
AT4G37660 Orysa4|Os07g43310.1  
Orysa4|Os07g01850.1  
AT3G29760  
AT2G36550,AT2G36540,AT4G26190 Orysa4|Os03g54850.1,Orysa4|Os03g54870.1  
AT3G48190 Orysa4|Os01g01689.1  
AT4G35930 Orysa4|Os10g30280.1  
AT3G46120,AT2G18130,AT1G52940,AT4G36350,AT1G56360  
Orysa4|Os12g44010.1  
Orysa4|Os12g44050.1  
AT5G34850 Orysa4|Os06g43640.1  
AT2G16430,AT2G27190 Orysa4|Os01g56880.1  
Orysa4|Os12g44030.1  
AT4G18372 Orysa4|Os06g46390.1  
AT4G33120,AT4G33110 Orysa4|Os06g37610.1  
Orysa4|Os03g62830.1  
AT4G17520,AT5G47210,AT4G16830  
Orysa4|Os05g45660.1,Orysa4|Os01g52390.1,Orysa4|Os01g41880.1,Orysa4|Os05g51180.1  
AT3G29300 Orysa4|Os04g55490.1  
AT1G65820 Orysa4|Os03g50130.1  
AT3G09085  
Orysa4|Os03g15910.1  
AT2G37020 Orysa4|Os10g30640.1  
AT5G66410,AT3G50960 Orysa4|Os11g39140.1,Orysa4|Os05g16630.1  
AT1G35250,AT1G35290,AT1G68280,AT1G68260  
Orysa4|Os02g44134.1,Orysa4|Os02g44200.1,Orysa4|Os04g46730.1  
AT3G27550 Orysa4|Os05g05300.1  
AT4G13070 Orysa4|Os06g20030.1  
AT2G28480 Orysa4|Os01g72820.1  
AT2G37930,AT5G01030,AT2G29510,AT5G59020 Orysa4|Os03g16070.1  
AT4G11820Orysa4|Os08g43170.1,Orysa4|Os09g34960.1,Orysa4|Os03g02710.1  
AT4G04920 Orysa4|Os10g35560.1  
AT3G08650 Orysa4|Os05g25194.1  
AT5G08150,AT3G30580,AT5G38790 Orysa4|Os08g37990.1  
AT3G01380 Orysa4|Os02g37050.1  
AT1G24450 Orysa4|Os03g63740.1  
Orysa4|Os07g33600.1  
AT5G36140,AT5G36110,AT5G36130  
Orysa4|Os07g30950.1,Orysa4|Os07g33620.1,Orysa4|Os07g33440.1  
Orysa4|Os07g33610.1,Orysa4|Os07g33580.1,Orysa4|Os07g33550.1,Orysa4|Os07g33560.1,Orysa4|Os07  
g33540.1,Orysa4|Os07g33420.1,Orysa4|Os07g33480.1,Orysa4|Os09g21260.1

AT3G25540,AT1G13580  
Orysa4|Os02g49590.1,Orysa4|Os02g37080.1  
AT3G19260 Orysa4|Os03g15750.1  
Orysa4|Os09g20630.1  
AT1G33330  
Orysa4|Os01g66379.1  
AT5G42480 Orysa4|Os02g03000.1  
Orysa4|Os08g05840.1  
AT5G55310,AT5G55300  
AT4G31490,AT4G31480 Orysa4|Os01g17430.1,Orysa4|Os11g07280.1  
AT5G23670,AT3G48780,AT3G48790 Orysa4|Os01g70360.1,Orysa4|Os11g31640.1  
AT2G44050 Orysa4|Os04g42000.1  
AT3G51730,AT5G01800 Orysa4|Os05g26954.1,Orysa4|Os01g07250.1  
AT3G28925  
AT5G62410,AT3G47460 Orysa4|Os01g67740.1  
AT5G48600  
AT2G32760 Orysa4|Os05g41160.1,Orysa4|Os06g50110.1  
AT5G11680,Orysa4|Os09g33800.1  
AT5G16350,AT5G12420,AT5G53380,AT5G22490,AT3G49210,AT3G49200,AT3G49190,AT2G43255,AT2G38995,AT5  
G37300,AT1G72110,AT5G53390  
Orysa4|Os01g48874.1,Orysa4|Os05g48260.1,Orysa4|Os05g35920.1,Orysa4|Os01g56370.1  
AT1G54170,AT3G14010 Orysa4|Os02g27950.1  
AT3G13070,AT1G55930  
Orysa4|Os03g39640.1  
AT5G65220 Orysa4|Os02g51790.1  
AT5G18830 Orysa4|Os05g33810.1  
AT1G31830,AT1G31820,AT5G05630 Orysa4|Os08g41370.1,Orysa4|Os02g47210.1,Orysa4|Os03g37984.1  
AT3G13620 Orysa4|Os03g25840.1,Orysa4|Os03g25820.1,Orysa4|Os03g25869.1,Orysa4|Os03g25920.1  
Orysa4|Os12g39080.1  
AT3G19553  
AT5G41820,AT4G24490 Orysa4|Os06g46380.1  
AT5G57510 Orysa4|Os08g34800.1  
AT1G48760 Orysa4|Os01g32880.1  
AT4G20100,AT2G41050 Orysa4|Os01g16170.1  
AT4G36850  
AT1G05370,AT3G22410 Orysa4|Os03g11950.1  
AT2G46915 Orysa4|Os06g01460.1  
Orysa4|Os04g50820.1  
AT4G10770 Orysa4|Os06g03560.1,Orysa4|Os06g03540.1,Orysa4|Os06g03700.1  
AT5G64410 Orysa4|Os01g43940.1,Orysa4|Os02g46850.1  
Orysa4|Os02g46860.1  
AT4G16370  
Orysa4|Os08g23130.1  
Orysa4|Os08g38400.1  
AT5G55930,AT4G26590  
Orysa4|Os03g54000.1  
AT1G09930  
AT5G53510,AT4G27730,AT5G53520  
Orysa4|Os05g30950.1,Orysa4|Os01g71050.1  
Orysa4|Os04g45190.1,Orysa4|Os02g42940.1,Orysa4|Os10g36350.1  
AT4G00170 Orysa4|Os08g05890.1  
AT5G47180 Orysa4|Os10g40170.1,Orysa4|Os10g40140.1  
AT3G60600,AT2G45140 Orysa4|Os08g06020.1  
Orysa4|Os04g46780.1,Orysa4|Os02g44300.1  
AT1G51270,AT2G23830,AT1G08820  
Orysa4|Os02g46510.1  
AT4G24550 Orysa4|Os07g42810.1  
AT5G46630  
Orysa4|Os09g17900.1  
AT1G60780,AT1G10730 Orysa4|Os05g46550.1  
AT5G13500 Orysa4|Os01g16600.1,Orysa4|Os05g32060.1  
AT5G25265,AT2G25260  
AT1G73990 Orysa4|Os02g49570.1  
AT1G18850 Orysa4|Os01g02170.1  
AT4G16420,AT3G07740 Orysa4|Os03g53960.1  
AT5G24690 Orysa4|Os12g18630.1  
AT2G42450 Orysa4|Os09g39790.1  
AT3G05480 Orysa4|Os03g22450.1  
Orysa4|Os08g16930.1  
AT5G57910,AT4G30630 Orysa4|Os09g25410.1  
AT4G17540 Orysa4|Os10g41380.1  
AT1G49975 Orysa4|Os03g52130.1  
AT4G22190 Orysa4|Os01g69290.1,Orysa4|Os11g30430.1  
Orysa4|Os07g36740.1,Orysa4|Os07g36690.1,Orysa4|Os07g36610.1,Orysa4|Os07g36630.1,Orysa4|Os07  
g36750.1,Orysa4|Os08g06380.1,Orysa4|Os12g29300.1,Orysa4|Os10g20260.1  
Orysa4|Os07g36680.1  
AT4G32410,AT2G25540 Orysa4|Os05g08370.1  
AT5G16910,AT3G03050 Orysa4|Os06g02180.1  
AT2G32540,AT2G32530,AT2G32610,AT2G32620,AT4G15320,AT4G15290  
Orysa4|Os04g35020.1,Orysa4|Os10g20090.1,Orysa4|Os04g35030.1  
Orysa4|Os09g30120.1,Orysa4|Os09g30130.1,Orysa4|Os02g49332.1  
AT2G33100 Orysa4|Os06g22980.1

AT4G18780 Orysa4|Os01g54620.1  
AT1G55850  
AT5G17420 Orysa4|Os09g25490.1  
AT5G64740,AT5G09870,AT2G21770,AT4G39350  
AT5G44030 Orysa4|Os10g32980.1  
Orysa4|Os06g39970.1  
AT1G02730 Orysa4|Os12g36890.1  
Orysa4|Os03g62090.1,Orysa4|Os07g24190.1,Orysa4|Os07g14850.1  
Orysa4|Os07g36620.1  
Orysa4|Os10g42750.1  
AT4G24000,AT4G24010,AT4G23990  
AT5G05170 Orysa4|Os07g10770.1,Orysa4|Os03g59340.1  
AT1G32180  
AT4G38190 Orysa4|Os08g25710.1  
AT5G51100,AT4G25100  
AT5G23310  
Orysa4|Os06g02500.1  
AT2G16500,AT4G34710 Orysa4|Os08g33620.1,Orysa4|Os06g04070.1  
Orysa4|Os04g01690.1  
Orysa4|Os04g02730.1  
AT4G38890  
AT2G33570 Orysa4|Os06g22330.1,Orysa4|Os02g48190.1,Orysa4|Os06g41910.1  
AT5G48190,AT3G60990,AT3G07380,AT4G20170,AT5G44670  
AT3G03490,AT5G17550 Orysa4|Os02g44220.1  
AT4G24370 Orysa4|Os08g05540.1  
AT5G50320 Orysa4|Os04g40840.1  
AT1G32220 Orysa4|Os04g33060.1  
AT5G10730 Orysa4|Os02g35039.1  
AT5G15910  
AT5G42146 Orysa4|Os03g64100.1  
AT2G40435,AT3G56220 Orysa4|Os12g02020.1  
Orysa4|Os05g27090.1  
AT1G29270  
Orysa4|Os07g47960.1  
AT1G23870,AT1G70290,AT1G60140  
Orysa4|Os12g32130.1,Orysa4|Os05g03810.1,Orysa4|Os05g06160.1,Orysa4|Os08g31980.1,Orysa4|Os09  
g20990.1  
Orysa4|Os03g12360.1  
AT2G18700  
Orysa4|Os09g25890.1,Orysa4|Os08g34580.1,Orysa4|Os02g54820.1  
AT1G17000,AT1G16980,AT4G27550  
AT1G78580 Orysa4|Os05g44210.1  
AT1G68020 Orysa4|Os09g23350.1  
AT1G06410 Orysa4|Os05g44100.1  
AT4G17770  
AT3G27570,AT5G40510  
AT5G55900,AT4G26620 Orysa4|Os02g49320.1  
AT5G55610 Orysa4|Os12g31490.1  
AT4G27160,AT4G27150,AT4G27170,AT4G27140,AT5G54740 Orysa4|Os05g41970.1  
AT3G19990 Orysa4|Os02g58150.1,Orysa4|Os02g58170.1  
Orysa4|Os01g43280.1,Orysa4|Os01g43270.1,Orysa4|Os02g14540.1,Orysa4|Os02g14570.1,Orysa4|Os02  
g14590.1,Orysa4|Os02g14630.1,Orysa4|Os05g12450.1  
Orysa4|Os07g30690.1,Orysa4|Os07g30760.1,Orysa4|Os07g30610.1,Orysa4|Os07g30469.1,Orysa4|Os07  
g30369.1,Orysa4|Os07g30620.1,Orysa4|Os09g03140.1  
Orysa4|Os02g31990.1,Orysa4|Os03g51420.1  
Orysa4|Os03g46400.1  
Orysa4|Os07g47550.1  
AT2G23210,AT2G23250,AT2G23260  
AT1G01420,AT1G01390,AT4G01070 Orysa4|Os11g38650.1  
Orysa4|Os04g52510.1  
AT2G36770,AT2G36780,AT2G36760,AT2G36800,AT2G36790,AT2G36750,AT3G53160,AT3G53150  
Orysa4|Os01g08100.1,Orysa4|Os01g08110.1,Orysa4|Os01g08090.1  
AT2G28080,AT2G36970 Orysa4|Os10g30560.1  
Orysa4|Os09g11290.1  
AT4G34131,AT4G34135,AT4G34138,AT2G15490,AT2G15480  
Orysa4|Os01g41430.1,Orysa4|Os01g41450.1,Orysa4|Os01g45110.1,Orysa4|Os01g45140.1  
AT5G17040,AT5G17030,AT5G17050,AT1G30530  
Orysa4|Os05g45120.1  
Orysa4|Os10g18490.1,Orysa4|Os02g11670.1  
Orysa4|Os03g62480.1,Orysa4|Os05g45100.1,Orysa4|Os10g07970.1,Orysa4|Os01g53460.1,Orysa4|Os05  
g45080.1,Orysa4|Os01g53430.1,Orysa4|Os05g45200.1,Orysa4|Os01g53330.1,Orysa4|Os01g53350.1,Orysa4|Os01g  
64910.1,Orysa4|Os05g45150.1,Orysa4|Os05g45180.1,Orysa4|Os09g30980.1,Orysa4|Os06g23560.1,Orysa4|Os01g5  
3420.1  
Orysa4|Os09g16110.1  
Orysa4|Os06g39080.1,Orysa4|Os06g39070.1,Orysa4|Os06g08830.1  
AT2G22590,AT5G65550,AT5G49690 Orysa4|Os01g64540.1  
Orysa4|Os02g11700.1,Orysa4|Os02g11640.1,Orysa4|Os02g11680.1,Orysa4|Os02g11130.1,Orysa4|Os02  
g11110.1,Orysa4|Os05g08480.1,Orysa4|Os03g24430.1  
Orysa4|Os06g11720.1  
Orysa4|Os06g37280.1  
AT3G02100  
Orysa4|Os10g18480.1,Orysa4|Os08g07180.1,Orysa4|Os10g18530.1,Orysa4|Os10g18510.1,Orysa4|Os10

g17489.1,Orysa4|Os03g55050.1,Orysa4|Os03g55040.1,Orysa4|Os03g55010.1,Orysa4|Os03g55030.1,Orysa4|Os03g55020.1  
AT5G66690,AT5G26310,AT3G50740,AT2G18570,AT2G18560,AT4G36770  
AT4G15270  
AT2G30150,AT2G30140 Orysa4|Os01g59110.1,Orysa4|Os05g41400.1,Orysa4|Os01g59100.1  
AT1G22380,AT1G22360,AT1G22400,AT1G22340,AT1G22370,AT1G78270  
Orysa4|Os02g51900.1,Orysa4|Os02g51910.1,Orysa4|Os07g42970.1,Orysa4|Os02g36810.1,Orysa4|Os02g36830.1,Orysa4|Os02g45580.1,Orysa4|Os02g36840.1,Orysa4|Os04g25490.1,Orysa4|Os08g31200.1,Orysa4|Os04g25440.1,Orysa4|Os04g25370.1,Orysa4|Os04g25980.1,Orysa4|Os04g25970.1,Orysa4|Os04g25380.1,Orysa4|Os04g24850.1,Orysa4|Os04g25800.1,Orysa4|Os02g51930.1  
Orysa4|Os06g17110.1  
AT3G22250 Orysa4|Os04g44354.1,Orysa4|Os02g42280.1  
AT5G12890  
Orysa4|Os04g20400.1,Orysa4|Os04g20330.1,Orysa4|Os04g20474.1,Orysa4|Os04g20540.1,Orysa4|Os04g20260.1,Orysa4|Os04g42690.1  
Orysa4|Os04g24840.1,Orysa4|Os04g25820.1  
Orysa4|Os03g59350.1,Orysa4|Os03g53350.1,Orysa4|Os05g42020.1,Orysa4|Os05g42040.1,Orysa4|Os05g42070.1  
Orysa4|Os08g07270.1,Orysa4|Os08g07200.1  
Orysa4|Os01g66620.1  
Orysa4|Os09g04760.1  
Orysa4|Os05g42080.1  
Orysa4|Os09g21170.1  
AT5G59590,AT5G59580,AT3G46650,AT3G46680,AT3G46720,AT3G46690,AT3G46700,AT3G46670,AT3G46660,AT5G37950,AT5G38010,AT5G38040,AT2G26480,AT3G55710,AT3G55700,AT5G05900,AT5G05880,AT5G05890,AT5G05860,AT5G05870,AT3G11340  
Orysa4|Os07g13800.1,Orysa4|Os07g13770.1,Orysa4|Os07g13660.1,Orysa4|Os03g60960.1,Orysa4|Os07g13634.1,Orysa4|Os11g25454.1,Orysa4|Os11g25730.1,Orysa4|Os07g13940.1,Orysa4|Os07g13810.1  
Orysa4|Os04g12678.1,Orysa4|Os04g12950.1  
AT1G51210,AT5G03490,AT1G73880,AT1G06000  
Orysa4|Os08g38130.1,Orysa4|Os08g38160.1,Orysa4|Os06g17260.1,Orysa4|Os04g55680.1,Orysa4|Os06g17020.1,Orysa4|Os06g17250.1,Orysa4|Os06g17120.1,Orysa4|Os06g17090.1,Orysa4|Os08g38110.1  
Orysa4|Os04g12710.1  
Orysa4|Os04g04070.1  
AT4G15500,AT4G15490,AT3G21560,AT4G15480  
Orysa4|Os01g49230.1,Orysa4|Os01g49240.1,Orysa4|Os05g47950.1,Orysa4|Os02g09510.1  
AT1G10400  
Orysa4|Os08g07170.1  
Orysa4|Os09g23400.1  
Orysa4|Os04g47720.1,Orysa4|Os04g47770.1,Orysa4|Os04g46970.1,Orysa4|Os04g46990.1,Orysa4|Os07g46610.1  
Orysa4|Os09g16090.1  
Orysa4|Os03g44180.1,Orysa4|Os03g55034.1  
Orysa4|Os04g12690.1  
AT4G15260,AT4G15280,AT3G21790,AT3G21800,AT3G21780,AT3G21760,AT3G21750,AT2G29750,AT2G29740,AT1G07260,AT1G07250,AT1G07240,AT2G29710,AT2G29730  
Orysa4|Os07g31960.1,Orysa4|Os07g32010.1,Orysa4|Os07g32060.1,Orysa4|Os07g32020.1,Orysa4|Os07g37690.1,Orysa4|Os07g32620.1,Orysa4|Os07g32630.1  
Orysa4|Os09g30990.1,Orysa4|Os03g59990.1  
Orysa4|Os05g08510.1  
Orysa4|Os03g30240.1  
Orysa4|Os10g12120.1  
Orysa4|Os07g13780.1  
AT1G24100,AT2G43840,AT2G43820,AT2G31790,AT1G05680,AT2G31750  
Orysa4|Os09g34270.1,Orysa4|Os09g34250.1,Orysa4|Os09g34230.1,Orysa4|Os09g34214.1,Orysa4|Os09g12900.1,Orysa4|Os04g12980.1,Orysa4|Os04g12720.1,Orysa4|Os04g12970.1,Orysa4|Os04g12960.1,Orysa4|Os03g48740.1  
AT2G16890,AT5G14860 Orysa4|Os04g24110.1,Orysa4|Os09g21160.1  
Orysa4|Os05g45140.1  
Orysa4|Os04g44250.1,Orysa4|Os04g44240.1  
Orysa4|Os05g45170.1  
Orysa4|Os02g28900.1  
Orysa4|Os03g11350.1  
AT1G05530,AT1G05560,AT4G15550,AT4G14090  
Orysa4|Os02g10880.1,Orysa4|Os06g39330.1,Orysa4|Os06g39270.1,Orysa4|Os05g08750.1,Orysa4|Os01g08440.1,Orysa4|Os11g25990.1,Orysa4|Os11g04860.1  
Orysa4|Os11g09700.1  
Orysa4|Os06g17220.1  
Orysa4|Os06g18670.1,Orysa4|Os06g18790.1,Orysa4|Os06g18140.1  
Orysa4|Os07g10220.1  
Orysa4|Os10g30570.1  
Orysa4|Os08g15330.1  
Orysa4|Os05g08490.1  
AT3G16520 Orysa4|Os01g53380.1,Orysa4|Os01g53370.1,Orysa4|Os01g50200.1  
Orysa4|Os04g12669.1  
Orysa4|Os10g03320.1,Orysa4|Os06g11270.1,Orysa4|Os12g37510.1,Orysa4|Os03g49550.1,Orysa4|Os02g37690.1,Orysa4|Os07g10240.1,Orysa4|Os03g59030.1,Orysa4|Os07g10190.1,Orysa4|Os07g10160.1,Orysa4|Os02g56010.1,Orysa4|Os07g10230.1  
Orysa4|Os06g11710.1  
Orysa4|Os11g26950.1  
AT1G64910,AT1G64920,AT5G53990,AT4G09500,AT2G22930,AT5G54010,AT4G27570,AT4G27560,AT1G50580,AT3G29630,AT5G54060

AT1G77350 Orysa4|Os05g40780.1  
AT2G11890 Orysa4|Os08g20400.1  
AT1G53870,AT1G53890,AT3G14260,AT1G63410 Orysa4|Os11g40170.1  
AT1G53900,AT1G53880,AT1G72340  
AT4G25990,AT5G57180 Orysa4|Os06g48610.1,Orysa4|Os02g05470.1  
AT5G14370 Orysa4|Os08g02620.1  
AT1G57540 Orysa4|Os01g14790.1  
AT2G24330,AT4G31090 Orysa4|Os04g44180.1,Orysa4|Os02g41990.1  
Orysa4|Os02g58380.1  
AT4G31080 Orysa4|Os04g57690.1  
Orysa4|Os10g39840.1,Orysa4|Os03g01800.1  
AT4G03210  
Orysa4|Os06g48180.1  
Orysa4|Os03g63760.1,Orysa4|Os02g03550.1,Orysa4|Os10g42670.1  
Orysa4|Os03g02610.1  
AT5G13870,AT2G06850 Orysa4|Os11g33270.1  
Orysa4|Os06g48160.1,Orysa4|Os06g48200.1  
Orysa4|Os08g14210.1,Orysa4|Os08g14200.1,Orysa4|Os04g51450.1,Orysa4|Os04g51510.1,Orysa4|Os04g51460.1  
AT2G36870,AT3G44990 Orysa4|Os02g57770.1  
AT4G37800,AT5G65730  
AT1G10550  
AT4G13080,AT4G13090,AT3G25050,AT3G48580 Orysa4|Os06g13040.1  
AT5G57540,AT5G57530,AT4G25820  
Orysa4|Os04g53950.1  
AT1G11545  
AT2G14620  
AT1G32170,AT4G18990  
AT2G01850,AT1G14720 Orysa4|Os10g02770.1,Orysa4|Os03g13570.1,Orysa4|Os09g23220.1  
AT4G28850 Orysa4|Os02g17900.1,Orysa4|Os02g17880.1,Orysa4|Os06g22919.1  
AT4G25810,AT5G57560,AT4G30270,AT4G30280,AT1G65310,AT4G30290,AT5G48070,AT2G18800,AT5G57550,AT3G23730,AT4G14130  
Orysa4|Os08g13920.1,Orysa4|Os04g51520.1,Orysa4|Os06g48170.1  
AT1G31870 Orysa4|Os08g08080.1  
Orysa4|Os02g10000.1  
AT1G21000,AT1G76590,AT1G43000 Orysa4|Os06g41930.1  
AT2G17785,AT1G31040 Orysa4|Os09g03080.1,Orysa4|Os09g02790.1,Orysa4|Os03g12440.1  
AT5G46710  
AT1G32700,AT4G17900  
AT2G12646  
Orysa4|Os02g09070.1  
Orysa4|Os10g42410.1  
Orysa4|Os04g50120.1,Orysa4|Os02g46610.1  
AT2G27930 Orysa4|Os11g24130.1,Orysa4|Os08g44620.1,Orysa4|Os01g33350.1,Orysa4|Os01g33370.1  
Orysa4|Os02g07650.1,Orysa4|Os06g45540.1  
AT3G60670  
AT4G03090 Orysa4|Os05g09630.1  
AT3G21350 Orysa4|Os06g11370.1  
AT2G28360,AT1G07990,AT3G45190  
AT1G30470 Orysa4|Os01g40340.1,Orysa4|Os05g51490.1,Orysa4|Os04g52940.1,Orysa4|Os01g40390.1  
AT5G19280 Orysa4|Os07g11010.1  
AT5G19850  
Orysa4|Os02g47620.1  
AT4G36530  
Orysa4|Os07g38830.1  
AT5G20350 Orysa4|Os02g09130.1,Orysa4|Os06g43680.1  
AT2G14250  
Orysa4|Os11g34860.1  
AT2G14255  
AT3G18270 Orysa4|Os01g04630.1  
Orysa4|Os05g07130.1  
Orysa4|Os03g18310.1  
AT1G07110  
AT4G22830  
Orysa4|Os04g31010.1  
AT5G02130 Orysa4|Os05g38330.1  
AT4G00770,AT4G23020,AT4G11780 Orysa4|Os04g48360.1,Orysa4|Os10g38020.1  
AT1G56345 Orysa4|Os12g37380.1  
AT1G01290 Orysa4|Os04g38700.1  
AT2G26650,AT2G25600,AT4G32500 Orysa4|Os01g45990.1  
Orysa4|Os04g36740.1  
AT4G18290,AT5G46240 Orysa4|Os01g55200.1,Orysa4|Os02g14840.1,Orysa4|Os01g11250.1  
AT3G02850,AT5G37500 Orysa4|Os06g14030.1  
AT4G32650  
Orysa4|Os04g02720.1,Orysa4|Os06g14310.1,Orysa4|Os01g52070.1  
Orysa4|Os03g28120.1  
AT4G22200 Orysa4|Os05g35410.1  
AT2G14835 Orysa4|Os10g20600.1  
AT1G10780 Orysa4|Os08g36570.1,Orysa4|Os09g28120.1  
Orysa4|Os04g41200.1  
AT1G05790  
Orysa4|Os01g67420.1

AT5G05310 Orysa4|Os12g02100.1  
AT3G05330 Orysa4|Os02g26140.1  
Orysa4|Os06g43140.1,Orysa4|Os02g09460.1  
AT1G21065 Orysa4|Os02g37680.1  
AT5G28730,AT1G43722 Orysa4|Os05g28600.1  
Orysa4|Os03g60030.1  
AT4G04635 Orysa4|Os01g66930.1,Orysa4|Os12g31660.1,Orysa4|Os02g13770.1,Orysa4|Os03g42464.1,Orysa4|Os11g25500.1  
AT5G28950  
AT1G71710,AT1G34120 Orysa4|Os01g08780.1  
Orysa4|Os01g51890.1,Orysa4|Os05g45900.1  
AT2G37440 Orysa4|Os05g02350.1  
Orysa4|Os01g26290.1,Orysa4|Os01g59880.1  
Orysa4|Os03g57950.1,Orysa4|Os07g07950.1,Orysa4|Os03g46090.1  
AT4G18010  
AT2G01900 Orysa4|Os08g32960.1,Orysa4|Os09g23140.1,Orysa4|Os03g13520.1  
AT5G65090 Orysa4|Os06g11920.1,Orysa4|Os02g51600.1  
AT1G47510 Orysa4|Os03g42810.1  
AT5G04980 Orysa4|Os05g41000.1  
AT1G05470,AT2G32010,AT3G63240 Orysa4|Os03g06460.1,Orysa4|Os10g28660.1  
AT2G38010 Orysa4|Os01g43520.1  
AT1G07380,AT5G58980  
AT3G16760 Orysa4|Os05g16470.1,Orysa4|Os03g22140.1  
AT1G65270 Orysa4|Os11g16320.1  
AT1G13560,AT3G25585 Orysa4|Os02g02750.1  
AT1G53760 Orysa4|Os02g05870.1  
AT2G41880,AT3G57550 Orysa4|Os12g33100.1  
AT1G50240 Orysa4|Os12g24550.1  
Orysa4|Os03g17440.1  
AT5G02720,AT3G53490 Orysa4|Os05g34680.1  
AT2G28860,AT2G28850,AT2G34500,AT2G34490  
Orysa4|Os01g11340.1,Orysa4|Os01g11300.1,Orysa4|Os01g11280.1,Orysa4|Os01g11270.1  
AT3G12345 Orysa4|Os06g28950.1  
AT2G31980 Orysa4|Os04g28250.1  
AT2G03120 Orysa4|Os02g02530.1,Orysa4|Os05g36070.1  
Orysa4|Os12g40520.1  
AT1G04300,AT5G43560,AT5G52330  
Orysa4|Os10g33830.1  
Orysa4|Os01g56800.1,Orysa4|Os05g43280.1  
AT4G16045  
Orysa4|Os06g10420.1  
AT5G12040 Orysa4|Os03g07910.1  
AT2G28410,AT5G60650 Orysa4|Os10g34010.1  
AT3G08030,AT2G41810,AT2G41800 Orysa4|Os07g10620.1,Orysa4|Os03g59300.1  
AT1G29980,AT2G34510 Orysa4|Os01g55190.1  
Orysa4|Os04g41750.1,Orysa4|Os04g41740.1,Orysa4|Os04g41710.1  
Orysa4|Os03g21130.1  
AT5G11420,AT5G25460,AT4G32460,AT1G80240  
Orysa4|Os01g42520.1  
AT5G14150 Orysa4|Os02g32600.1  
Orysa4|Os02g11040.1  
Orysa4|Os04g41770.1  
AT2G27750,AT5G05210 Orysa4|Os05g30880.1  
AT4G24590,AT5G49710 Orysa4|Os02g54080.1  
AT3G10150 Orysa4|Os01g71420.1  
AT4G08580,AT5G17900  
Orysa4|Os11g11080.1,Orysa4|Os02g19380.1,Orysa4|Os06g22850.1,Orysa4|Os02g17870.1  
AT4G03175 Orysa4|Os07g28930.1  
AT4G35500,AT2G17530  
AT5G22840,AT3G44850,AT3G53030  
AT5G09860 Orysa4|Os03g01970.1  
Orysa4|Os11g32960.1  
AT3G48760  
AT5G04270 Orysa4|Os02g57370.1  
AT3G09320 Orysa4|Os01g62620.1  
AT5G05070,AT3G56920,AT2G40990,AT3G56930 Orysa4|Os11g03910.1,Orysa4|Os12g03730.1  
AT3G18620 Orysa4|Os06g20400.1  
Orysa4|Os08g42620.1  
AT5G41060,AT3G26935 Orysa4|Os08g42370.1,Orysa4|Os09g33450.1,Orysa4|Os01g70100.1  
Orysa4|Os04g47410.1,Orysa4|Os12g29560.1  
Orysa4|Os03g16790.1  
AT3G04970 Orysa4|Os03g24900.1  
AT5G50020,AT4G24630 Orysa4|Os05g36090.1,Orysa4|Os01g64810.1,Orysa4|Os08g01300.1  
AT3G18430 Orysa4|Os02g55880.1  
Orysa4|Os08g34340.1  
AT4G27120 Orysa4|Os07g01320.1  
AT2G03410  
Orysa4|Os03g07600.1  
AT5G47540,AT4G17270 Orysa4|Os07g39630.1  
AT5G18940 Orysa4|Os07g45280.1,Orysa4|Os03g24520.1



AT4G33210 Orysa4|Os10g25680.1  
AT2G34090 Orysa4|Os01g42800.1  
AT5G07610 Orysa4|Os02g41930.1  
AT1G71990 Orysa4|Os04g35270.1,Orysa4|Os12g07290.1  
AT5G34930  
Orysa4|Os06g35050.1  
AT1G15710  
Orysa4|Os06g49520.1  
AT3G01880,AT3G01870,AT2G44230,AT2G44260 Orysa4|Os07g38840.1  
AT5G18490,AT3G04350,AT1G04090,AT5G43950 Orysa4|Os03g51150.1,Orysa4|Os03g04930.1  
AT4G24710 Orysa4|Os04g40290.1  
AT5G03300,AT3G09820 Orysa4|Os04g43750.1  
Orysa4|Os11g38860.1  
Orysa4|Os10g37770.1  
Orysa4|Os12g07870.1,Orysa4|Os12g07840.1,Orysa4|Os11g08314.1  
AT4G10440,AT1G33170  
AT1G19430 Orysa4|Os03g56380.1  
AT3G51070  
AT3G56080  
AT3G23300,AT4G14360,AT1G04430 Orysa4|Os10g33720.1  
AT2G40280 Orysa4|Os01g61250.1,Orysa4|Os05g39520.1  
Orysa4|Os10g36690.1  
AT4G18030 Orysa4|Os10g41970.1  
AT1G31850,AT4G19120  
AT2G03480,AT1G13860  
AT5G14430  
AT1G26850 Orysa4|Os09g24900.1  
Orysa4|Os03g26200.1  
AT1G78240 Orysa4|Os02g51860.1  
AT2G39750,AT5G06050,AT1G77260 Orysa4|Os01g62800.1  
Orysa4|Os04g14150.1  
AT4G00750,AT2G45750 Orysa4|Os04g48230.1,Orysa4|Os02g45310.1,Orysa4|Os06g03750.1  
Orysa4|Os06g01450.1  
AT2G43200 Orysa4|Os01g67360.1  
AT1G29470,AT2G34300,AT5G64030 Orysa4|Os04g59590.1  
AT3G03370  
AT4G00740  
AT3G10200,AT5G04060 Orysa4|Os05g31480.1  
Orysa4|Os07g41560.1  
Orysa4|Os11g30830.1,Orysa4|Os11g30910.1,Orysa4|Os11g30810.1,Orysa4|Os09g38239.1,Orysa4|Os11g26390.1,Orysa4|Os07g41540.1,Orysa4|Os10g11270.1,Orysa4|Os11g15370.1,Orysa4|Os08g14190.1,Orysa4|Os08g14180.1,Orysa4|Os08g17510.1,Orysa4|Os08g20130.1,Orysa4|Os07g05450.1,Orysa4|Os07g05460.1,Orysa4|Os12g17160.1,Orysa4|Os07g41460.1,Orysa4|Os04g29000.1,Orysa4|Os11g30890.1,Orysa4|Os08g40390.1,Orysa4|Os08g40380.1,Orysa4|Os08g40330.1,Orysa4|Os04g44460.1,Orysa4|Os06g42120.1,Orysa4|Os12g04350.1,Orysa4|Os11g04550.1,Orysa4|Os12g04320.1,Orysa4|Os11g04540.1,Orysa4|Os12g04340.1,Orysa4|Os12g04300.1,Orysa4|Os01g20950.1,Orysa4|Os02g45890.1  
AT2G03760,AT2G03770  
AT3G45080,AT3G45070,AT2G27570,AT5G43690,AT4G26280,AT1G13430,AT2G14920,AT1G13420,AT1G28170,AT2G03750  
Orysa4|Os08g17520.1  
AT5G07000,AT5G07010  
AT1G18590,AT1G74090,AT1G74100  
AT3G51210 Orysa4|Os06g14220.1  
AT1G67690 Orysa4|Os01g67590.1  
AT5G43960 Orysa4|Os04g43150.1  
AT3G25150  
AT3G07250,AT5G48650  
AT3G55540,AT1G69250  
AT1G13730,AT2G03640 Orysa4|Os07g41180.1,Orysa4|Os03g30550.1  
AT5G60980 Orysa4|Os02g29480.1,Orysa4|Os04g30430.1  
AT3G10116  
AT3G02210,AT3G29810  
AT5G15630 Orysa4|Os03g30250.1  
AT5G60920 Orysa4|Os03g30260.1,Orysa4|Os07g41310.1,Orysa4|Os03g54750.1,Orysa4|Os05g32110.1  
AT1G09790 Orysa4|Os04g45700.1  
AT5G60950  
AT2G26420  
Orysa4|Os12g04700.1,Orysa4|Os11g04840.1,Orysa4|Os11g04900.1  
AT1G01460  
AT3G09920 Orysa4|Os02g57660.1  
AT3G56960,AT2G41210,AT3G07960 Orysa4|Os03g24170.1,Orysa4|Os07g46490.1,Orysa4|Os03g24160.1  
AT4G01190  
Orysa4|Os03g15550.1  
Orysa4|Os09g38330.1  
AT1G10900,AT1G60890 Orysa4|Os03g49510.1  
AT1G77740,AT1G21980 Orysa4|Os03g49800.1  
AT2G25530 Orysa4|Os03g63500.1  
AT1G63610 Orysa4|Os02g58650.1  
AT5G19190,AT3G06070 Orysa4|Os05g32970.1  
AT3G04560 Orysa4|Os02g57500.1  
Orysa4|Os09g39540.1,Orysa4|Os08g44480.1,Orysa4|Os11g05562.1  
AT2G21580,AT4G39200,AT4G34555

AT2G16360  
AT3G28360,AT3G28390,AT3G28380,AT3G28415,AT3G28345 Orysa4|Os02g09720.1  
Orysa4|Os04g40570.1  
Orysa4|Os01g34970.1  
Orysa4|Os08g05710.1  
Orysa4|Os01g56400.1  
Orysa4|Os05g04600.1  
AT4G25960,AT1G10680 Orysa4|Os02g46680.1  
Orysa4|Os02g21750.1  
AT1G28010,AT1G27940  
AT3G55320,AT2G39480 Orysa4|Os01g74470.1,Orysa4|Os03g17180.1  
AT3G28860 Orysa4|Os04g38570.1  
Orysa4|Os04g54930.1  
Orysa4|Os05g47500.1,Orysa4|Os01g50160.1,Orysa4|Os01g50080.1,Orysa4|Os05g47490.1  
AT2G36910  
Orysa4|Os04g33700.1,Orysa4|Os03g54880.1  
AT5G58270,AT4G28630,AT4G28620 Orysa4|Os06g03770.1  
AT1G70610 Orysa4|Os01g68330.1  
Orysa4|Os01g52550.1  
AT1G65410 Orysa4|Os03g46740.1  
AT4G01820,AT4G01830,AT1G02530,AT1G02520,AT2G47000,AT3G62150  
Orysa4|Os05g04610.1,Orysa4|Os01g18670.1  
AT5G14100 Orysa4|Os11g29850.1  
AT1G63270 Orysa4|Os04g53550.1  
AT1G67940 Orysa4|Os06g48060.1  
Orysa4|Os01g29870.1  
Orysa4|Os01g50070.1  
AT4G33460  
AT5G39040 Orysa4|Os03g54790.1  
AT4G25450 Orysa4|Os07g28090.1  
AT4G18050,AT5G46540  
AT5G03910  
AT5G10010  
AT5G64910 Orysa4|Os02g31960.1,Orysa4|Os04g56590.1  
Orysa4|Os01g05710.1,Orysa4|Os01g05720.1,Orysa4|Os01g05760.1,Orysa4|Os08g30340.1,Orysa4|Os01  
g05744.1  
Orysa4|Os02g20450.1,Orysa4|Os01g05780.1  
AT5G59770  
AT5G10480 Orysa4|Os01g05694.1,Orysa4|Os04g20280.1  
AT3G57290 Orysa4|Os07g12110.1,Orysa4|Os07g07250.1,Orysa4|Os07g32040.1  
Orysa4|Os02g40770.1  
AT3G04380  
AT5G43990,AT1G04050  
AT5G42470 Orysa4|Os06g50170.1  
AT3G21055,AT1G51400 Orysa4|Os02g37060.1  
AT5G50400,AT4G24890 Orysa4|Os09g32840.1  
AT1G13900,AT2G03450 Orysa4|Os07g02090.1  
Orysa4|Os09g32830.1  
AT1G13750 Orysa4|Os12g38760.1,Orysa4|Os12g38750.1,Orysa4|Os12g38770.1,Orysa4|Os03g11530.1  
AT1G13760  
Orysa4|Os01g58640.1  
Orysa4|Os04g22240.1  
Orysa4|Os05g01230.1  
AT1G66050,AT1G66040,AT5G39550,AT1G57800,AT1G57820,AT4G08590  
AT1G76050 Orysa4|Os06g50360.1  
AT4G12790 Orysa4|Os03g21914.1,Orysa4|Os03g50620.1  
AT5G60040  
Orysa4|Os04g42360.1  
Orysa4|Os04g41490.1  
Orysa4|Os08g05940.1  
Orysa4|Os03g32030.1  
AT3G57660 Orysa4|Os06g40950.1  
AT4G35800  
AT1G73030,AT1G17730 Orysa4|Os06g43590.1  
AT2G26470 Orysa4|Os06g27650.1  
AT3G22300 Orysa4|Os06g34780.1  
AT4G24200 Orysa4|Os06g42490.1  
AT3G12650 Orysa4|Os02g48680.1  
AT2G40980 Orysa4|Os02g29890.1  
AT1G08370 Orysa4|Os12g06020.1,Orysa4|Os11g05650.1,Orysa4|Os03g62080.1  
AT2G38695 Orysa4|Os09g27070.1  
AT4G16070  
AT3G14075 Orysa4|Os02g54010.1  
Orysa4|Os03g61540.1,Orysa4|Os12g36770.1  
Orysa4|Os05g22600.1  
Orysa4|Os01g20840.1  
Orysa4|Os05g28180.1  
Orysa4|Os07g49270.1  
AT2G38280  
AT1G76250 Orysa4|Os02g02730.1  
AT3G08800 Orysa4|Os03g17340.1  
AT3G51100Orysa4|Os09g36100.1

AT5G15560,AT1G69280 Orysa4|Os01g09730.1  
 AT3G02125  
 AT2G03630,AT1G74220 Orysa4|Os07g20270.1  
 AT2G27385,AT5G22430 Orysa4|Os02g33170.1  
 AT5G62300,AT3G45030,AT3G47370 Orysa4|Os10g08930.1,Orysa4|Os03g14530.1  
 AT3G57680  
 Orysa4|Os06g21380.1  
 AT4G17740 Orysa4|Os02g57060.1  
 Orysa4|Os08g23410.1  
 AT1G54500  
 AT1G48850 Orysa4|Os03g14990.1  
 AT5G01310 Orysa4|Os03g18210.1  
 AT1G02010 Orysa4|Os06g04450.1  
 AT1G12360,AT4G12120 Orysa4|Os04g18030.1,Orysa4|Os02g25580.1  
 AT4G26220 Orysa4|Os08g38920.1,Orysa4|Os08g38910.1,Orysa4|Os09g30360.1,Orysa4|Os08g38900.1  
 AT1G67990,AT1G67980,AT1G24735  
 AT3G62000,AT3G61990 Orysa4|Os08g05790.1  
 AT4G34050 Orysa4|Os06g06980.1  
 AT1G75980 Orysa4|Os02g02810.1  
 AT2G05910,AT5G20640 Orysa4|Os04g36830.1,Orysa4|Os03g08200.1  
 AT2G03800 Orysa4|Os09g07320.1,Orysa4|Os08g25140.1  
 AT1G63980 Orysa4|Os03g03390.1  
 Orysa4|Os07g06890.1  
 AT5G06580  
 Orysa4|Os04g41910.1  
 AT5G16260  
 AT5G11040  
 Orysa4|Os04g42370.1  
 AT5G57040 Orysa4|Os07g06660.1  
 AT1G27520 Orysa4|Os02g50780.1  
 AT5G43710 Orysa4|Os01g56670.1  
 AT1G06710 Orysa4|Os04g41140.1  
 AT5G62370  
 AT4G19440 Orysa4|Os08g19310.1  
 AT2G39230,AT3G54980 Orysa4|Os01g42620.1  
 AT2G30780,AT2G48000 Orysa4|Os05g33760.1  
 AT1G74580 Orysa4|Os07g01130.1  
 AT2G15630 Orysa4|Os04g40130.1  
 AT2G19280  
 AT1G80150 Orysa4|Os08g39050.1  
 AT3G56030,AT2G40240  
 AT2G31400  
 AT1G09680 Orysa4|Os04g38930.1  
 AT5G06400 Orysa4|Os12g27060.1  
 Orysa4|Os05g32730.1,Orysa4|Os02g21580.1,Orysa4|Os03g11690.1,Orysa4|Os04g57900.1  
 Orysa4|Os08g21570.1  
 AT5G27270  
 AT1G73400 Orysa4|Os02g52220.1  
 AT5G24830  
 AT3G06430 Orysa4|Os03g19650.1  
 AT1G63320  
 AT3G29290  
 AT2G15980 Orysa4|Os12g21930.1  
 Orysa4|Os03g07220.1  
 Orysa4|Os09g36230.1  
 AT5G46100 Orysa4|Os01g48140.1  
 AT4G34830  
 AT1G26500 Orysa4|Os07g40820.1  
 AT4G38150 Orysa4|Os01g36600.1  
 AT2G17525,AT5G15280  
 Orysa4|Os11g39360.1  
 AT3G23020 Orysa4|Os03g06710.1  
 AT1G12300,AT1G12620,AT1G12775,AT3G22470,AT1G12700,AT1G63630,AT1G63230,AT1G62860,AT1G64100,AT1G63400,AT1G62910,AT1G63150,AT1G62590,AT1G63330,AT1G62930,AT1G63130,AT1G62670,AT1G63070,AT1G63080,AT1G62720,AT1G62680,AT5G16640,AT1G06580,AT1G64580,AT3G16710,AT5G41170,AT4G26800,AT2G16880  
 AT4G39620 Orysa4|Os03g58120.1  
 AT1G08610 Orysa4|Os10g33700.1  
 AT2G18940 Orysa4|Os05g19380.1  
 AT3G46610 Orysa4|Os12g18640.1  
 Orysa4|Os02g58300.1,Orysa4|Os10g34370.1  
 AT3G61360  
 AT5G28460,AT3G61520,AT5G28370 Orysa4|Os06g13950.1  
 Orysa4|Os06g12930.1  
 AT1G12670  
 AT5G18950  
 AT5G55840 Orysa4|Os03g40690.1  
 Orysa4|Os06g44820.1  
 AT3G06920 Orysa4|Os07g14530.1  
 AT3G18110 Orysa4|Os06g09880.1  
 AT1G10910  
 Orysa4|Os08g01870.1,Orysa4|Os08g01640.1,Orysa4|Os08g01650.1,Orysa4|Os10g35240.1,Orysa4|Os10

g35230.1,Orysa4|Os10g35436.1,Orysa4|Os08g15000.1,Orysa4|Os10g35640.1,Orysa4|Os10g35790.1  
AT2G17033  
AT2G36240 Orysa4|Os01g68070.1  
AT1G77405 Orysa4|Os10g35090.1,Orysa4|Os12g37550.1  
AT5G21222,AT5G25630  
AT5G47360 Orysa4|Os03g07760.1  
AT5G11310 Orysa4|Os09g31100.1  
AT5G15010  
AT1G51965 Orysa4|Os02g13340.1  
AT1G30290 Orysa4|Os12g42120.1  
AT4G14190  
AT5G64320 Orysa4|Os10g22370.1  
AT1G52620  
AT1G79540 Orysa4|Os09g02260.1  
Orysa4|Os06g49670.1  
AT3G07290  
AT3G09060 Orysa4|Os01g63400.1  
AT5G48730 Orysa4|Os06g07550.1  
AT1G13040 Orysa4|Os07g48850.1  
AT5G18390 Orysa4|Os08g41380.1  
AT1G80880 Orysa4|Os08g17080.1  
Orysa4|Os01g67210.1  
AT5G12100 Orysa4|Os08g31110.1  
AT1G11710,AT5G38730  
AT4G20740 Orysa4|Os07g08180.1  
AT1G74900 Orysa4|Os02g45590.1  
AT2G01360  
AT3G15200 Orysa4|Os01g05860.1  
AT3G16010 Orysa4|Os02g16650.1  
Orysa4|Os02g48122.1  
AT4G28010 Orysa4|Os07g42880.1  
AT5G04810 Orysa4|Os04g58780.1  
Orysa4|Os10g10170.1  
Orysa4|Os04g28234.1  
Orysa4|Os03g52620.1  
AT5G18475 Orysa4|Os02g26890.1  
AT2G18520,AT4G36680 Orysa4|Os02g42210.1  
AT2G32630 Orysa4|Os07g47470.1  
AT1G31840  
AT1G77340,AT5G65560 Orysa4|Os08g20610.1,Orysa4|Os06g47570.1  
AT5G65820 Orysa4|Os03g51840.1  
AT3G14580  
AT4G11690  
Orysa4|Os01g15840.1  
AT5G43820 Orysa4|Os02g20160.1  
AT5G59900 Orysa4|Os01g06000.1  
AT5G39980  
AT1G77360  
AT1G06270,AT2G27800 Orysa4|Os01g54380.1  
Orysa4|Os04g40010.1  
AT1G71210 Orysa4|Os02g03530.1  
AT5G46580  
Orysa4|Os04g39000.1,Orysa4|Os05g50690.1,Orysa4|Os03g24880.1  
AT1G71060 Orysa4|Os01g32090.1  
Orysa4|Os01g07340.1  
Orysa4|Os10g02650.1  
AT2G35130 Orysa4|Os02g07360.1  
Orysa4|Os06g36910.1  
AT4G01570 Orysa4|Os03g50500.1  
AT5G14080 Orysa4|Os03g56960.1  
Orysa4|Os08g28180.1  
AT3G25210  
AT1G02060 Orysa4|Os02g02950.1  
AT1G05600 Orysa4|Os01g68550.1  
AT1G22960 Orysa4|Os12g05640.1  
Orysa4|Os04g21470.1,Orysa4|Os01g42890.1  
AT3G04130 Orysa4|Os02g38950.1  
AT5G46680 Orysa4|Os02g55020.1  
AT5G42310 Orysa4|Os07g36390.1  
AT3G59040  
AT5G60960 Orysa4|Os07g41260.1  
AT5G61990 Orysa4|Os07g20510.1  
AT1G01970 Orysa4|Os07g46730.1  
AT2G41720 Orysa4|Os07g11280.1  
AT1G20300 Orysa4|Os09g37070.1  
AT3G18020 Orysa4|Os07g47720.1  
AT3G53170 Orysa4|Os03g02430.1  
Orysa4|Os05g24270.1,Orysa4|Os11g03850.1  
Orysa4|Os02g21070.1,Orysa4|Os01g61630.1

AT5G14770 Orysa4|Os02g57800.1  
AT4G26680,AT5G40400,AT1G66345  
AT3G13160,AT1G55890,AT3G13150  
AT4G30825 Orysa4|Os09g25550.1  
AT3G16890 Orysa4|Os12g37100.1  
AT2G17140 Orysa4|Os02g03930.1  
Orysa4|Os04g44030.1  
AT1G07740  
AT1G05670 Orysa4|Os07g32900.1  
AT1G02420 Orysa4|Os03g11020.1  
AT1G73710 Orysa4|Os07g28900.1  
Orysa4|Os03g12430.1,Orysa4|Os01g60010.1  
AT5G61370  
AT2G01740 Orysa4|Os10g42760.1  
AT1G79490  
AT5G01110 Orysa4|Os03g06910.1  
AT1G19525  
AT3G09650 Orysa4|Os12g01210.1,Orysa4|Os11g01210.1  
AT1G80550 Orysa4|Os04g55090.1  
AT5G50280 Orysa4|Os05g22870.1  
AT1G74850 Orysa4|Os03g60910.1  
AT4G20090 Orysa4|Os06g30420.1  
AT3G62540,AT5G14820,AT3G62470 Orysa4|Os05g28720.1  
Orysa4|Os09g27740.1,Orysa4|Os06g24900.1  
AT4G21170  
AT1G52640  
AT3G22670 Orysa4|Os03g53490.1  
AT5G61400 Orysa4|Os09g25050.1  
AT2G01390 Orysa4|Os10g21470.1  
Orysa4|Os05g24930.1  
Orysa4|Os06g08570.1  
AT1G19290 Orysa4|Os05g19390.1  
AT1G09820  
AT2G37230 Orysa4|Os02g02020.1  
Orysa4|Os04g28200.1  
AT2G17670 Orysa4|Os02g02740.1  
AT1G53330 Orysa4|Os05g11700.1  
AT4G34820 Orysa4|Os09g04510.1  
AT1G19520 Orysa4|Os03g06370.1  
AT3G53700 Orysa4|Os03g40020.1  
AT1G03560 Orysa4|Os07g30930.1  
AT3G48810 Orysa4|Os05g04160.1  
AT2G28050  
AT1G10270 Orysa4|Os05g30240.1  
Orysa4|Os11g02140.1  
AT3G17370  
AT4G31850 Orysa4|Os10g28600.1  
AT3G49240 Orysa4|Os11g24570.1  
AT3G60050,AT1G55630 Orysa4|Os10g36190.1  
AT5G39710 Orysa4|Os06g05920.1  
AT1G13630 Orysa4|Os10g33874.1  
AT2G06000  
AT1G18900,AT1G74750 Orysa4|Os12g44170.1  
AT1G13800,AT2G26790 Orysa4|Os11g43800.1,Orysa4|Os02g43080.1  
AT1G11900 Orysa4|Os05g40320.1  
AT5G02860 Orysa4|Os07g40120.1  
AT1G76280 Orysa4|Os09g29790.1  
AT1G61870,AT1G11630 Orysa4|Os01g58080.1  
AT1G09900,AT3G04760,AT1G79080 Orysa4|Os02g27070.1,Orysa4|Os01g57410.1  
AT5G13770 Orysa4|Os04g49350.1  
AT2G38420  
Orysa4|Os03g21780.1  
Orysa4|Os02g39820.1  
AT3G42560 Orysa4|Os01g62400.1  
AT4G16390 Orysa4|Os03g11670.1  
Orysa4|Os06g31300.1  
AT5G16420 Orysa4|Os06g03530.1  
Orysa4|Os10g35650.1  
AT3G27050 Orysa4|Os11g29700.1  
AT3G49430  
AT1G09140,AT4G02430,AT1G02840 Orysa4|Os01g21420.1,Orysa4|Os05g30140.1,Orysa4|Os07g47630.1  
AT4G30770,AT5G17590 Orysa4|Os08g26590.1,Orysa4|Os11g09030.1  
AT5G20070 Orysa4|Os06g04910.1  
AT5G52030 Orysa4|Os08g43230.1  
AT5G17690 Orysa4|Os10g17770.1  
AT5G61500 Orysa4|Os10g41110.1,Orysa4|Os01g10290.1  
AT1G69680 Orysa4|Os04g38610.1  
AT4G36190,AT4G36195,AT2G18080 Orysa4|Os10g36780.1,Orysa4|Os10g36760.1  
AT2G27280,AT2G27285,AT1G55928 Orysa4|Os04g35910.1  
AT1G10590 Orysa4|Os05g01050.1  
Orysa4|Os06g01370.1,Orysa4|Os01g55030.1

AT1G03810,AT4G28440,AT2G33845 Orysa4|Os05g15520.1  
AT1G23750  
AT3G54670 Orysa4|Os12g44390.1  
AT2G31440 Orysa4|Os02g17280.1  
Orysa4|Os01g46760.1,Orysa4|Os05g49730.1  
AT5G51760  
Orysa4|Os05g46040.1  
AT3G63320,AT1G17550,AT1G72770,AT1G17545 Orysa4|Os03g38920.1  
Orysa4|Os01g40094.1  
Orysa4|Os04g08560.1  
AT5G57050,AT4G26080  
AT3G11410,AT2G29380,AT1G07430,AT5G59220  
Orysa4|Os05g38290.1,Orysa4|Os01g62760.1,Orysa4|Os09g15670.1,Orysa4|Os03g16170.1  
AT4G11040  
AT4G10060,AT1G33700  
AT5G49900 Orysa4|Os11g13810.1  
Orysa4|Os08g01940.1  
AT3G24180 Orysa4|Os07g26210.1  
AT5G64830 Orysa4|Os04g54820.1  
AT3G09280 Orysa4|Os07g36430.1  
AT3G47910 Orysa4|Os03g06950.1  
AT3G47890,AT3G47900  
AT5G15770 Orysa4|Os02g48650.1,Orysa4|Os09g31310.1  
AT1G71200,AT3G56980,AT3G56970,AT2G41240,AT5G04150 Orysa4|Os01g72370.1  
AT3G53010  
AT4G34215 Orysa4|Os04g20810.1  
Orysa4|Os04g01980.1,Orysa4|Os03g64050.1,Orysa4|Os03g64030.1  
AT5G45610 Orysa4|Os02g03590.1  
AT3G48410 Orysa4|Os04g33600.1,Orysa4|Os04g33590.1,Orysa4|Os02g32970.1  
AT3G54240  
AT3G44510 Orysa4|Os10g37700.1  
AT5G22460,AT3G03230,AT3G03240 Orysa4|Os12g05630.1,Orysa4|Os12g05600.1  
AT3G44520  
Orysa4|Os01g63990.1  
AT1G08310  
AT1G74290,AT1G74280,AT1G74300,AT2G36290  
Orysa4|Os03g02514.1,Orysa4|Os10g37710.1,Orysa4|Os10g37720.1  
AT1G62780 Orysa4|Os04g01540.1  
Orysa4|Os11g43030.1,Orysa4|Os11g43040.1,Orysa4|Os04g12140.1,Orysa4|Os11g45380.1  
Orysa4|Os06g05990.1  
Orysa4|Os06g06000.1  
Orysa4|Os04g19700.1,Orysa4|Os08g03270.1,Orysa4|Os12g10250.1,Orysa4|Os10g32750.1,Orysa4|Os11g11610.1  
AT5G49665 Orysa4|Os04g01160.1  
AT4G37890,AT2G22680,AT5G65683  
Orysa4|Os03g28990.1,Orysa4|Os12g24390.1  
Orysa4|Os09g12720.1  
Orysa4|Os04g42980.1,Orysa4|Os02g40664.1  
AT1G08050  
Orysa4|Os10g32740.1,Orysa4|Os03g04890.1  
AT5G60710,AT3G54780,AT2G38970 Orysa4|Os02g56280.1  
AT1G06010 Orysa4|Os04g56610.1  
AT1G14650,AT1G14640,AT5G06890,AT5G12280,AT3G49130,AT5G06520,AT2G43960,AT3G27600,AT4G16200  
Orysa4|Os02g14780.1  
AT5G05200 Orysa4|Os07g12530.1  
AT2G25310,AT4G32130 Orysa4|Os06g43650.1  
AT1G12800 Orysa4|Os02g02390.1  
AT1G23290,AT1G70600,AT1G12960 Orysa4|Os07g42170.1,Orysa4|Os03g29460.1,Orysa4|Os02g07890.1  
AT1G78895,AT1G16830 Orysa4|Os08g12850.1  
AT2G30200  
Orysa4|Os03g18590.1  
AT5G48240 Orysa4|Os11g16480.1  
AT2G32900 Orysa4|Os11g34310.1  
AT3G62920 Orysa4|Os05g30810.1  
Orysa4|Os01g56960.1,Orysa4|Os01g56980.1  
AT5G15070,AT3G01310 Orysa4|Os03g48300.1  
AT1G23280 Orysa4|Os07g17040.1,Orysa4|Os07g16950.1  
AT1G76920 Orysa4|Os04g59010.1  
AT1G06060 Orysa4|Os01g56820.1  
AT4G17910  
Orysa4|Os03g26090.1  
AT5G37360 Orysa4|Os02g57030.1  
AT1G60640  
Orysa4|Os01g32130.1  
AT1G69935,AT4G33780 Orysa4|Os03g12930.1  
AT2G31060 Orysa4|Os01g54910.1  
AT5G13650  
Orysa4|Os02g18450.1  
AT5G52370,AT5G58990 Orysa4|Os02g27960.1  
AT5G52100 Orysa4|Os03g02570.1,Orysa4|Os03g02690.1  
AT3G05760  
Orysa4|Os03g61640.1

Orysa4|Os10g02814.1  
AT1G31930 Orysa4|Os06g02130.1,Orysa4|Os11g10050.1  
AT2G23460,AT4G34390 Orysa4|Os12g40190.1  
AT2G15760,AT2G26530 Orysa4|Os07g42740.1  
AT2G26990 Orysa4|Os01g17180.1  
AT2G14850,AT4G33890,AT5G67410 Orysa4|Os03g55450.1  
AT2G24530,AT4G31440 Orysa4|Os02g03680.1,Orysa4|Os04g56300.1  
Orysa4|Os04g21650.1  
Orysa4|Os12g39090.1  
AT2G46150,AT2G44000,AT1G64065,AT4G23610  
Orysa4|Os01g53470.1,Orysa4|Os05g45070.1,Orysa4|Os02g16610.1  
AT3G17890 Orysa4|Os10g34200.1  
AT3G21070 Orysa4|Os05g32210.1,Orysa4|Os01g72690.1  
AT1G75660  
AT1G54490  
Orysa4|Os02g28074.1  
AT5G42540  
AT4G29410,AT2G19730 Orysa4|Os02g57540.1,Orysa4|Os05g46430.1,Orysa4|Os01g51020.1  
AT5G44730 Orysa4|Os06g45440.1,Orysa4|Os02g07730.1  
AT3G63330 Orysa4|Os11g37540.1  
AT1G01200 Orysa4|Os06g50060.1,Orysa4|Os09g35860.1  
AT1G02130  
AT5G60860 Orysa4|Os09g15790.1,Orysa4|Os05g48980.1  
Orysa4|Os01g47730.1  
AT1G05810,AT2G31680,AT2G43130 Orysa4|Os08g41340.1  
AT2G33870,AT1G28550,AT3G15060  
AT3G54840 Orysa4|Os10g30520.1,Orysa4|Os03g05740.1  
Orysa4|Os07g31370.1  
AT1G73640,AT1G18200  
AT3G12160  
AT2G21880  
AT1G09630 Orysa4|Os05g01480.1  
AT3G07410  
Orysa4|Os02g43690.1  
AT4G18430  
AT4G18800,AT5G45750 Orysa4|Os06g35814.1  
AT5G10260,AT2G22290  
Orysa4|Os05g27530.1  
AT4G17160  
AT3G09910,AT5G03530 Orysa4|Os10g31830.1,Orysa4|Os03g05280.1  
Orysa4|Os03g09140.1  
AT1G43890  
AT5G46025  
Orysa4|Os05g20050.1  
AT4G07524  
AT1G06400  
AT4G39890  
AT1G22740  
AT3G16100,AT1G52280 Orysa4|Os01g12730.1  
AT5G03520,AT3G09900  
AT3G18820,AT1G49300 Orysa4|Os05g44050.1  
AT4G17170 Orysa4|Os02g37420.1  
AT4G03156,AT4G08190  
AT5G64990  
AT3G46060,AT5G59840,AT3G53610 Orysa4|Os03g60530.1,Orysa4|Os07g13530.1,Orysa4|Os05g38630.1  
Orysa4|Os10g14150.1  
AT5G65270,AT4G39990 Orysa4|Os10g23100.1  
AT4G17530,AT5G47200  
Orysa4|Os04g39440.1  
AT4G09720 Orysa4|Os01g51700.1  
AT5G47960 Orysa4|Os09g10940.1  
AT5G45130,AT4G19640 Orysa4|Os12g43550.1,Orysa4|Os03g46390.1  
AT4G35860  
AT5G47520  
AT3G11730 Orysa4|Os05g01490.1  
AT5G39620  
Orysa4|Os06g47260.1  
Orysa4|Os07g09680.1  
Orysa4|Os02g21710.1  
AT1G07410,AT3G46830,AT5G59150 Orysa4|Os03g60870.1  
AT2G44610  
AT1G16920 Orysa4|Os01g54590.1,Orysa4|Os05g44070.1  
AT3G04460 Orysa4|Os10g32960.1  
AT1G57680 Orysa4|Os04g36630.1,Orysa4|Os01g66190.1  
Orysa4|Os08g25830.1  
AT4G29120  
Orysa4|Os01g33500.1,Orysa4|Os01g53910.1  
AT1G71180,AT1G71170 Orysa4|Os05g49070.1  
AT4G31290,AT5G26220 Orysa4|Os02g26700.1  
AT1G44790 Orysa4|Os04g37580.1  
AT2G39170 Orysa4|Os08g05630.1  
AT2G04630,AT5G51940

Orysa4|Os07g27930.1,Orysa4|Os03g38960.1,Orysa4|Os07g27890.1,Orysa4|Os08g32990.1  
Orysa4|Os02g50840.1  
AT3G48050,AT3G48060  
AT5G55290,AT4G26710 Orysa4|Os04g56540.1  
AT4G32140 Orysa4|Os04g55260.1  
AT2G27720,AT2G27710,AT3G44590  
Orysa4|Os02g32760.1,Orysa4|Os01g09510.1  
AT3G28500,AT5G40040 Orysa4|Os08g15180.1,Orysa4|Os07g28710.1  
Orysa4|Os05g37330.1  
AT5G16850 Orysa4|Os12g19549.1  
AT2G36710,AT2G36700  
Orysa4|Os08g34910.1,Orysa4|Os09g26360.1  
AT2G21610 Orysa4|Os01g44340.1  
AT5G04970,AT3G10720  
Orysa4|Os11g07090.1,Orysa4|Os06g09340.1  
AT4G33220,AT3G43270  
AT5G47500 Orysa4|Os04g46740.1  
AT2G43050,AT3G59010  
AT3G29090 Orysa4|Os10g26680.1  
AT2G26440  
AT5G19730 Orysa4|Os05g44600.1,Orysa4|Os01g53990.1  
AT5G07430,AT5G07420,AT5G07410,AT1G69940,AT5G61680  
AT1G11580,AT1G11370,AT3G27980,AT1G11590,AT4G03930  
Orysa4|Os01g57854.1  
AT1G05310 Orysa4|Os08g10604.1  
AT5G09760,AT5G64640 Orysa4|Os01g65790.1  
AT5G55590 Orysa4|Os07g41650.1  
Orysa4|Os07g46190.1  
Orysa4|Os11g43840.1  
AT4G33230,AT2G26450 Orysa4|Os04g43370.1  
AT3G42160  
Orysa4|Os09g39760.1  
AT3G06830,AT5G49180,AT4G15980  
Orysa4|Os04g35770.1  
AT3G24130,AT5G18990,AT5G26810,AT2G47280,AT2G19150 Orysa4|Os01g19440.1  
AT3G14310,AT1G53830  
Orysa4|Os11g08870.1,Orysa4|Os11g08750.1,Orysa4|Os11g36240.1,Orysa4|Os08g12410.1  
AT1G23200,AT3G60730,AT2G45220,AT3G47400,AT5G51490,AT5G51500,AT4G00190  
Orysa4|Os11g45720.1,Orysa4|Os12g37660.1  
AT3G49220,AT5G53370 Orysa4|Os01g13320.1,Orysa4|Os02g18650.1  
AT3G10710,AT5G04960,AT1G53840,AT3G14300  
AT2G47040,AT2G47030,AT3G62170 Orysa4|Os04g54850.1,Orysa4|Os04g38560.1  
AT1G44980  
AT3G05620 Orysa4|Os01g15039.1  
AT5G27870,AT3G05610 Orysa4|Os03g18860.1  
AT4G02300,AT4G02320 Orysa4|Os01g21034.1,Orysa4|Os07g47830.1  
AT1G02810,AT4G02330,AT2G47550 Orysa4|Os05g29790.1,Orysa4|Os01g20980.1  
AT5G20860  
Orysa4|Os11g43850.1,Orysa4|Os11g43830.1  
AT3G17060 Orysa4|Os03g19610.1  
AT4G14310 Orysa4|Os02g56520.1  
AT1G12850 Orysa4|Os11g31880.1  
AT5G57280 Orysa4|Os02g56020.1  
AT1G32380,AT2G35390  
Orysa4|Os06g41360.1  
AT2G44530 Orysa4|Os02g03540.1  
AT2G36835 Orysa4|Os01g56890.1  
AT1G21700 Orysa4|Os12g07730.1  
AT2G33610 Orysa4|Os02g10060.1  
AT2G47620 Orysa4|Os04g40420.1  
AT4G34430 Orysa4|Os03g51220.1  
AT5G54140 Orysa4|Os04g44110.1  
AT1G44350 Orysa4|Os06g47620.1  
Orysa4|Os01g51060.1  
AT3G02875 Orysa4|Os03g62070.1,Orysa4|Os03g62060.1,Orysa4|Os07g14590.1,Orysa4|Os07g14600.1  
Orysa4|Os07g14610.1  
AT1G51780,AT1G51760 Orysa4|Os01g37960.1  
AT5G56650,AT5G56660  
AT2G40300,AT3G56090,AT3G11050,AT5G01600 Orysa4|Os12g01530.1  
AT4G29680 Orysa4|Os01g10020.1  
AT4G29710,AT4G29700,AT4G29690  
AT4G39740 Orysa4|Os02g06480.1  
AT3G08950  
AT5G09350,AT5G64070 Orysa4|Os11g10420.1  
AT4G16410 Orysa4|Os07g41630.1  
AT4G28680  
Orysa4|Os10g23900.1,Orysa4|Os01g56380.1,Orysa4|Os05g43510.1  
AT2G20340 Orysa4|Os07g25590.1  
Orysa4|Os10g26110.1  
Orysa4|Os08g04560.1,Orysa4|Os08g04540.1  
Orysa4|Os01g22630.1  
AT5G58190



Orysa4|Os08g12760.1,Orysa4|Os04g51940.1  
AT1G09810 Orysa4|Os05g01520.1,Orysa4|Os04g04000.1  
Orysa4|Os07g07490.1  
AT5G61020,AT3G03950  
AT1G48110,AT3G17330 Orysa4|Os03g20180.1  
AT3G13060 Orysa4|Os08g44200.1  
AT1G27960  
AT1G79270 Orysa4|Os01g48790.1  
AT1G55500,AT3G13460 Orysa4|Os03g53670.1,Orysa4|Os03g06240.1  
Orysa4|Os05g06740.1  
AT3G18410,AT1G49140 Orysa4|Os10g42540.1  
AT4G20720,AT1G05090 Orysa4|Os08g34760.1  
AT3G16230,AT3G16220 Orysa4|Os01g13090.1,Orysa4|Os01g13100.1  
AT1G49400,AT3G18880 Orysa4|Os08g27090.1  
AT1G51080 Orysa4|Os03g04580.1  
AT5G55100 Orysa4|Os01g50320.1  
AT2G28800 Orysa4|Os01g05800.1  
AT1G24490 Orysa4|Os03g62750.1  
AT2G21520,AT4G39170 Orysa4|Os02g04020.1  
AT5G47510 Orysa4|Os07g27310.1  
AT4G34580,AT2G16380,AT4G39180,AT2G21540,AT2G18180,AT4G36490  
Orysa4|Os10g03400.1,Orysa4|Os02g24430.1,Orysa4|Os02g04030.1  
AT1G75370,AT1G19650  
AT1G55690,AT5G56160,AT3G24840 Orysa4|Os05g14980.1,Orysa4|Os08g38850.1,Orysa4|Os02g48990.1  
Orysa4|Os01g50616.1  
AT5G44130,AT1G03870,AT2G20520 Orysa4|Os05g48890.1,Orysa4|Os05g48900.1,Orysa4|Os02g20560.1  
AT5G03170 Orysa4|Os05g07060.1,Orysa4|Os01g06580.1  
AT5G60490  
AT2G04780 Orysa4|Os09g30486.1,Orysa4|Os08g39270.1,Orysa4|Os04g39600.1  
Orysa4|Os04g39590.1  
Orysa4|Os02g55520.1  
AT5G45290 Orysa4|Os05g32350.1  
AT4G36390 Orysa4|Os11g38030.1  
AT5G49050 Orysa4|Os03g22390.1,Orysa4|Os07g47620.1  
AT2G47710 Orysa4|Os12g36630.1  
AT2G26740,AT2G26750  
AT3G05600  
AT3G51000 Orysa4|Os01g15120.1,Orysa4|Os03g61340.1,Orysa4|Os05g19150.1  
Orysa4|Os12g43970.1  
AT4G15955,AT4G15960,AT4G02340  
AT1G50590 Orysa4|Os09g31120.1  
Orysa4|Os03g62790.1  
Orysa4|Os08g27720.1  
AT3G59260,AT3G59220,AT2G43120  
AT1G08490 Orysa4|Os12g18900.1  
AT4G35170 Orysa4|Os01g12820.1,Orysa4|Os06g06780.1  
AT3G24600  
AT1G45688,AT5G42860 Orysa4|Os04g59330.1  
AT3G08490 Orysa4|Os03g11710.1  
AT2G41990 Orysa4|Os02g44740.1  
Orysa4|Os04g35130.1  
AT5G07960 Orysa4|Os03g54980.1  
AT3G61070,AT2G45740,AT1G01820 Orysa4|Os03g02590.1  
Orysa4|Os06g03660.1  
AT2G34460 Orysa4|Os06g25439.1  
AT4G21215 Orysa4|Os01g57740.1,Orysa4|Os07g34650.1  
AT4G38370 Orysa4|Os04g14760.1  
AT5G26160  
AT5G20610 Orysa4|Os01g51640.1  
Orysa4|Os02g57210.1  
AT5G06120 Orysa4|Os03g42050.1  
Orysa4|Os11g27300.1,Orysa4|Os12g38640.1  
AT5G08050  
AT1G74730 Orysa4|Os01g40310.1  
AT3G02660 Orysa4|Os01g31610.1  
AT1G01770 Orysa4|Os07g27350.1  
AT1G71190 Orysa4|Os01g73120.1  
AT5G11870 Orysa4|Os01g10100.1  
AT4G02920,AT1G03340 Orysa4|Os05g05140.1  
AT3G01920 Orysa4|Os08g41910.1  
AT5G10620 Orysa4|Os04g51786.1  
Orysa4|Os12g03990.1,Orysa4|Os11g04180.1  
AT4G18593 Orysa4|Os02g15270.1  
AT2G35880 Orysa4|Os11g36340.1  
AT2G25480,AT4G32330  
Orysa4|Os02g10690.1  
AT5G43260 Orysa4|Os02g30320.1  
AT1G53460 Orysa4|Os01g10630.1  
AT5G66640,AT5G17890,AT5G66610,AT5G66620,AT5G66630  
AT1G19270 Orysa4|Os12g40490.1,Orysa4|Os06g08400.1

AT2G39830 Orysa4|Os03g16090.1  
AT4G36860  
AT3G55520 Orysa4|Os01g62610.1,Orysa4|Os05g38370.1  
AT4G33470 Orysa4|Os12g08220.1  
Orysa4|Os06g15580.1,Orysa4|Os01g04510.1  
AT4G33495 Orysa4|Os09g35740.1,Orysa4|Os01g43040.1  
AT1G71850,AT4G24320 Orysa4|Os03g44430.1  
AT3G58520 Orysa4|Os04g46170.1  
AT2G31290 Orysa4|Os06g15550.1  
Orysa4|Os05g49610.1  
AT5G45790 Orysa4|Os12g03630.1,Orysa4|Os02g26550.1  
AT2G39120 Orysa4|Os03g57270.1  
Orysa4|Os03g03330.1,Orysa4|Os10g36680.1  
AT3G63090  
AT1G06440  
AT5G21970 Orysa4|Os03g08350.1,Orysa4|Os11g34160.1  
AT5G62990 Orysa4|Os04g24710.1  
Orysa4|Os04g52790.1  
AT4G08940  
AT5G48040 Orysa4|Os02g32540.1  
Orysa4|Os02g20860.1  
AT2G34050  
AT1G23110,AT1G70900 Orysa4|Os09g24510.1,Orysa4|Os08g33640.1  
AT5G04290 Orysa4|Os05g43060.1  
Orysa4|Os02g53230.1  
AT4G08360,AT4G08350,AT2G34210 Orysa4|Os06g10620.1  
AT2G34590,AT1G30120 Orysa4|Os12g42230.1,Orysa4|Os03g44300.1  
AT5G50850  
Orysa4|Os07g07470.1  
AT3G13450,AT1G55510  
Orysa4|Os09g33500.1  
AT5G64040 Orysa4|Os12g08770.1  
AT1G51405 Orysa4|Os03g11770.1  
AT1G07750,AT2G28680 Orysa4|Os05g02520.1,Orysa4|Os01g74480.1  
AT4G09830,AT5G64780 Orysa4|Os08g30730.1,Orysa4|Os09g19640.1,Orysa4|Os01g40690.1  
Orysa4|Os01g08690.1  
AT5G27820 Orysa4|Os03g48840.1,Orysa4|Os01g15290.1  
AT4G34490 Orysa4|Os08g34780.1  
AT3G12280 Orysa4|Os08g42600.1  
Orysa4|Os11g32900.1  
AT2G43940,AT2G43920,AT2G43910 Orysa4|Os03g62670.1,Orysa4|Os06g06040.1  
Orysa4|Os04g10460.1,Orysa4|Os04g10530.1,Orysa4|Os06g16030.1,Orysa4|Os04g10410.1  
Orysa4|Os01g02500.1,Orysa4|Os04g10640.1  
Orysa4|Os04g10569.1  
AT4G34880  
Orysa4|Os10g06710.1  
Orysa4|Os04g10630.1  
AT3G11450,AT5G06110  
AT1G74250 Orysa4|Os12g31840.1  
AT4G26965 Orysa4|Os05g46140.1,Orysa4|Os09g32430.1  
AT3G11810,AT2G03330 Orysa4|Os12g15520.1  
AT4G01900 Orysa4|Os05g04220.1  
AT1G71720 Orysa4|Os01g40640.1,Orysa4|Os05g45920.1  
AT1G53490 Orysa4|Os02g13810.1  
AT3G59990,AT2G44180 Orysa4|Os08g42910.1,Orysa4|Os12g43370.1  
AT5G51545 Orysa4|Os02g03250.1  
AT1G51350 Orysa4|Os11g41990.1  
Orysa4|Os08g03570.1,Orysa4|Os04g52730.1  
AT2G34850,AT1G30620,AT4G20460,AT5G44480 Orysa4|Os07g04690.1  
AT3G28530,AT4G23920,AT4G10960,AT1G64440 Orysa4|Os05g51670.1  
AT1G63180,AT1G12780 Orysa4|Os09g35800.1  
Orysa4|Os09g15420.1  
AT5G27700,AT3G53890 Orysa4|Os03g22460.1  
AT3G04470 Orysa4|Os02g56530.1  
AT1G62050,AT1G11740 Orysa4|Os07g32790.1  
Orysa4|Os07g25460.1  
AT1G04780,AT3G24210 Orysa4|Os07g25470.1  
Orysa4|Os03g15690.1  
AT3G48850  
AT2G17270 Orysa4|Os09g38100.1  
AT5G14040 Orysa4|Os06g10810.1,Orysa4|Os02g52860.1,Orysa4|Os04g37600.1  
AT1G48510  
AT3G17910 Orysa4|Os03g10360.1  
AT3G30841,AT4G09520 Orysa4|Os12g35040.1  
AT4G34120,AT4G36910 Orysa4|Os09g02710.1,Orysa4|Os08g22149.1  
AT3G52730 Orysa4|Os05g33210.1  
AT3G45970,AT3G45960,AT4G38400 Orysa4|Os03g04020.1,Orysa4|Os10g39640.1,Orysa4|Os06g50960.1  
AT5G45620,AT4G19006 Orysa4|Os01g32800.1,Orysa4|Os03g11570.1  
AT1G16290 Orysa4|Os02g07480.1  
AT2G17570,AT5G60510,AT5G60500  
AT2G23410,AT2G23400,AT5G58782,AT5G58780,AT5G58784,AT5G58770 Orysa4|Os01g63830.1  
AT2G24150,AT4G30850 Orysa4|Os02g08320.1,Orysa4|Os06g44250.1

Orysa4|Os12g32640.1  
AT5G20270 Orysa4|Os06g43620.1  
Orysa4|Os03g31760.1,Orysa4|Os06g47060.1  
AT2G40710,AT4G38320,AT4G37680,AT4G38290,AT4G38330 Orysa4|Os03g10300.1  
AT1G09620 Orysa4|Os09g32650.1,Orysa4|Os09g21110.1,Orysa4|Os05g15150.1  
AT5G51010 Orysa4|Os11g32500.1  
AT4G18596,AT5G45880,AT1G29140 Orysa4|Os05g13340.1  
AT5G10130,AT4G08685,AT1G78040  
Orysa4|Os10g22590.1,Orysa4|Os04g32680.1,Orysa4|Os07g40100.1,Orysa4|Os09g39950.1  
AT4G29940 Orysa4|Os02g05450.1  
Orysa4|Os09g09790.1  
AT4G26500  
AT1G55805 Orysa4|Os02g42400.1,Orysa4|Os03g11990.1  
AT5G03430 Orysa4|Os01g15490.1  
AT4G39810 Orysa4|Os05g01200.1  
AT5G61390,AT5G07710,AT1G74390 Orysa4|Os10g29090.1,Orysa4|Os10g26720.1,Orysa4|Os10g26730.1  
AT5G38530 Orysa4|Os06g42560.1  
AT2G47450 Orysa4|Os03g03990.1  
Orysa4|Os07g14840.1  
AT5G17640 Orysa4|Os08g06640.1  
AT1G10020,AT4G29310,AT1G50040,AT3G19680 Orysa4|Os03g56220.1  
AT2G46180,AT3G61570 Orysa4|Os08g29730.1  
AT5G17910 Orysa4|Os05g41150.1,Orysa4|Os01g59670.1,Orysa4|Os03g64390.1,Orysa4|Os07g28920.1  
AT4G13590 Orysa4|Os11g34180.1  
Orysa4|Os11g28300.1  
AT5G36290  
Orysa4|Os01g12220.1  
Orysa4|Os08g41670.1  
AT1G64150  
AT1G68650,AT1G25520 Orysa4|Os08g33630.1  
AT5G27660  
Orysa4|Os11g14170.1  
AT1G72420,AT1G17350 Orysa4|Os01g52720.1  
Orysa4|Os03g09160.1  
AT2G35980 Orysa4|Os04g58850.1  
AT1G08160  
AT5G36970,AT1G65690,AT1G54540 Orysa4|Os04g58090.1  
AT5G21130,AT2G27080 Orysa4|Os01g59680.1  
Orysa4|Os02g30450.1  
Orysa4|Os09g09460.1,Orysa4|Os08g23460.1  
AT1G05190 Orysa4|Os03g24020.1  
AT2G18400 Orysa4|Os03g51510.1  
AT1G53645 Orysa4|Os06g45390.1  
AT1G52500 Orysa4|Os08g21330.1  
Orysa4|Os06g43610.1  
AT5G43930,AT1G04140 Orysa4|Os09g12550.1,Orysa4|Os02g18820.1  
AT3G10640,AT5G04850 Orysa4|Os01g01350.1  
AT3G54200  
AT3G05975 Orysa4|Os12g02700.1,Orysa4|Os11g02730.1,Orysa4|Os06g32970.1,Orysa4|Os05g40400.1  
Orysa4|Os07g34040.1,Orysa4|Os07g34050.1,Orysa4|Os05g24760.1  
AT3G26570 Orysa4|Os02g38020.1  
AT1G60770 Orysa4|Os04g25410.1  
AT4G21705 Orysa4|Os07g40750.1  
AT2G20710 Orysa4|Os10g35750.1,Orysa4|Os10g35730.1,Orysa4|Os10g35760.1  
AT5G09450 Orysa4|Os04g37720.1  
AT5G27460 Orysa4|Os02g55310.1  
AT1G02150 Orysa4|Os04g46010.1  
AT4G01990,AT1G02370  
AT2G20720,AT4G02820  
AT3G11350,AT3G11380,AT1G28020,AT1G28000,AT1G43010  
Orysa4|Os01g19529.1,Orysa4|Os01g19490.1,Orysa4|Os01g19548.1  
AT1G72060 Orysa4|Os03g52390.1  
AT3G29390 Orysa4|Os03g11520.1  
AT5G13890 Orysa4|Os11g32950.1  
AT5G11720  
AT5G63840 Orysa4|Os03g11720.1  
AT3G45940,AT1G68560 Orysa4|Os01g03950.1  
Orysa4|Os06g46284.1  
AT3G23640 Orysa4|Os07g23944.1,Orysa4|Os07g23880.1  
AT1G80070,AT4G38780 Orysa4|Os05g07050.1  
AT2G02570 Orysa4|Os08g01840.1  
AT5G06420,AT1G01350,AT5G39640,AT4G01023 Orysa4|Os02g19804.1  
AT1G77090 Orysa4|Os12g08830.1  
AT5G12470 Orysa4|Os01g72710.1,Orysa4|Os05g32230.1  
AT1G51160 Orysa4|Os01g33020.1  
AT3G21200 Orysa4|Os08g15500.1  
AT5G04990,AT3G10730 Orysa4|Os05g18770.1  
Orysa4|Os09g29530.1,Orysa4|Os01g16220.1  
AT1G60670,AT1G10820,AT1G68160 Orysa4|Os04g44210.1,Orysa4|Os02g42020.1,Orysa4|Os04g57700.1  
AT3G07565 Orysa4|Os04g41830.1  
AT1G79780,AT3G16300 Orysa4|Os01g52610.1  
AT1G09800 Orysa4|Os12g09290.1

AT1G73180 Orysa4|Os02g39350.1  
AT1G27090,AT3G24690 Orysa4|Os12g36700.1,Orysa4|Os11g11180.1,Orysa4|Os03g48260.1  
AT4G29400 Orysa4|Os01g37820.1  
AT5G08400 Orysa4|Os02g58120.1  
AT1G34640 Orysa4|Os07g43010.1  
AT5G50890 Orysa4|Os01g54810.1,Orysa4|Os01g14080.1,Orysa4|Os07g39810.1,Orysa4|Os01g47610.1  
AT5G48490,AT5G48485 Orysa4|Os07g18990.1,Orysa4|Os07g19000.1,Orysa4|Os07g18750.1,Orysa4|Os01g68589.1  
AT5G57030 Orysa4|Os01g39960.1  
AT3G10230 Orysa4|Os02g09750.1  
AT5G48470 Orysa4|Os11g23790.1  
AT1G47813,AT1G47820 Orysa4|Os06g50350.1  
AT3G17300 Orysa4|Os12g37850.1  
AT5G54660 Orysa4|Os05g42120.1  
AT1G54410 Orysa4|Os03g45280.1  
AT3G11240,AT5G05700 Orysa4|Os05g37434.1  
AT3G62140 Orysa4|Os01g21860.1  
AT3G10040 Orysa4|Os01g21590.1  
AT1G21200,AT1G76870 Orysa4|Os11g06410.1,Orysa4|Os12g06640.1,Orysa4|Os02g33770.1  
AT2G32350 Orysa4|Os09g30390.1  
AT1G50430 Orysa4|Os02g26650.1  
Orysa4|Os01g22440.1  
AT5G64420 Orysa4|Os02g04270.1  
AT3G61710 Orysa4|Os03g15290.1,Orysa4|Os03g44200.1  
AT3G02860 Orysa4|Os05g41530.1  
AT5G52290 Orysa4|Os02g42910.1  
AT2G37330 Orysa4|Os05g02750.1  
AT3G48300,AT3G48270,AT3G48320,AT3G48310,AT3G48290,AT3G48280,AT2G30770,AT2G30750,AT1G11610,AT5G24950,AT5G24960,AT4G13290,AT4G13310,AT5G42590,AT4G20240  
Orysa4|Os08g01520.1,Orysa4|Os08g01510.1,Orysa4|Os08g01490.1,Orysa4|Os08g01470.1,Orysa4|Os08g01450.1,Orysa4|Os06g22020.1,Orysa4|Os11g27730.1  
Orysa4|Os04g03890.1,Orysa4|Os04g03870.1,Orysa4|Os10g36740.1  
Orysa4|Os03g30420.1,Orysa4|Os07g41240.1  
Orysa4|Os07g19160.1,Orysa4|Os12g39310.1  
Orysa4|Os10g12050.1  
Orysa4|Os01g12770.1,Orysa4|Os01g12760.1,Orysa4|Os01g12750.1,Orysa4|Os01g12740.1,Orysa4|Os05g35010.1,Orysa4|Os09g36080.1,Orysa4|Os06g15680.1,Orysa4|Os05g43910.1  
Orysa4|Os12g39230.1,Orysa4|Os03g16840.1  
AT2G22330,AT4G39950,AT5G35917,AT5G05260  
Orysa4|Os04g08824.1,Orysa4|Os04g08828.1,Orysa4|Os03g37290.1  
AT1G58265 Orysa4|Os03g55250.1  
Orysa4|Os05g29750.1  
AT4G13770,AT4G31500  
Orysa4|Os04g40460.1,Orysa4|Os04g40470.1,Orysa4|Os12g16720.1  
Orysa4|Os06g10260.1,Orysa4|Os03g44740.1  
Orysa4|Os06g42610.1,Orysa4|Os10g37034.1  
AT2G26170 Orysa4|Os01g50590.1  
Orysa4|Os02g29960.1  
AT5G35920  
Orysa4|Os06g36920.1  
Orysa4|Os01g50530.1  
Orysa4|Os03g25150.1  
AT2G30490 Orysa4|Os05g25640.1  
AT4G12320,AT4G12310,AT4G12300,AT4G12330,AT5G44620,AT4G22690,AT4G22710  
Orysa4|Os08g43440.1,Orysa4|Os01g50490.1  
Orysa4|Os02g09330.1  
AT5G25900 Orysa4|Os06g37224.1,Orysa4|Os06g37300.1,Orysa4|Os06g37364.1,Orysa4|Os06g37330.1  
Orysa4|Os03g40600.1  
Orysa4|Os11g29720.1  
Orysa4|Os08g01480.1  
Orysa4|Os02g09230.1  
AT3G61035  
Orysa4|Os10g08230.1  
Orysa4|Os03g39550.1  
Orysa4|Os06g43470.1  
Orysa4|Os11g35670.1  
Orysa4|Os10g09110.1  
AT5G07990 Orysa4|Os10g16974.1,Orysa4|Os10g17260.1  
Orysa4|Os03g04190.1  
Orysa4|Os04g09430.1,Orysa4|Os09g26950.1  
AT5G25120,AT5G25130,AT5G25140,AT5G25180,AT3G26310,AT3G26300,AT3G26290,AT3G26320,AT3G26330,AT2G02580,AT5G57260,AT2G24180,AT1G13100,AT1G13090,AT1G13110,AT3G26830,AT3G26210,AT3G26190,AT3G26200,AT3G53280,AT3G44250,AT5G35715,AT3G53300,AT3G53305,AT3G53290,AT3G26170,AT3G26180,AT3G26150,AT3G26160,AT1G13080,AT3G26270,AT3G26280,AT3G26230,AT3G26220  
Orysa4|Os03g63310.1,Orysa4|Os12g32850.1,Orysa4|Os03g37080.1,Orysa4|Os07g19210.1  
AT4G37330,AT4G37320,AT4G37360,AT4G37340,AT1G66540,AT4G37370,AT2G23190,AT2G23220,AT3G28740,AT5G36220,AT5G57220,AT4G37430,AT4G37410,AT4G37400,AT4G37310,AT5G67310,AT5G10600,AT5G10610  
Orysa4|Os03g55260.1,Orysa4|Os03g55240.1,Orysa4|Os02g30110.1,Orysa4|Os02g30100.1,Orysa4|Os02g30090.1,Orysa4|Os02g30080.1,Orysa4|Os04g18380.1,Orysa4|Os12g39240.1,Orysa4|Os12g39300.1  
Orysa4|Os06g39420.1  
AT2G45550,AT2G45570,AT2G45560,AT1G33730,AT1G33720,AT2G45580,AT3G61040,AT3G52970  
Orysa4|Os06g39780.1,Orysa4|Os02g36110.1,Orysa4|Os02g36070.1,Orysa4|Os01g38110.1,Orysa4|Os02

g36280.1,Orysa4|Os02g36030.1,Orysa4|Os08g39660.1,Orysa4|Os08g39730.1,Orysa4|Os08g39640.1,Orysa4|Os08g39694.1,Orysa4|Os08g36310.1,Orysa4|Os12g09790.1,Orysa4|Os09g27500.1,Orysa4|Os09g27510.1  
AT3G61880,AT2G46660,AT1G01190 Orysa4|Os09g35940.1,Orysa4|Os08g43390.1  
Orysa4|Os01g36350.1  
Orysa4|Os03g55230.1  
AT5G09970 Orysa4|Os10g26340.1  
AT4G15110Orysa4|Os02g07680.1  
Orysa4|Os06g43510.1  
AT1G01280 Orysa4|Os08g03682.1  
Orysa4|Os10g21050.1  
Orysa4|Os09g27560.1  
Orysa4|Os03g40610.1  
AT4G20235 Orysa4|Os07g26870.1  
AT3G10570,AT5G04660,AT5G04630,AT3G10560 Orysa4|Os04g33370.1  
AT2G40890 Orysa4|Os05g41440.1  
Orysa4|Os04g08836.1  
AT1G11600Orysa4|Os06g46680.1  
Orysa4|Os03g39540.1  
Orysa4|Os04g45630.1,Orysa4|Os06g24180.1  
AT1G16400,AT1G16410,AT1G58260,AT1G79370  
Orysa4|Os03g37070.1,Orysa4|Os01g36294.1,Orysa4|Os06g43440.1  
Orysa4|Os10g12080.1  
Orysa4|Os01g50580.1  
AT5G06900 Orysa4|Os06g01250.1,Orysa4|Os04g01140.1,Orysa4|Os06g41070.1  
AT1G64950,AT2G12190,AT1G64940,AT1G64930,AT1G64900,AT5G61320,AT3G03470  
Orysa4|Os10g37110.1,Orysa4|Os10g37120.1,Orysa4|Os10g37160.1,Orysa4|Os10g37020.1,Orysa4|Os10g37050.1,Orysa4|Os10g36960.1,Orysa4|Os10g37070.1,Orysa4|Os10g37100.1,Orysa4|Os10g05020.1,Orysa4|Os02g01890.1,Orysa4|Os08g05620.1,Orysa4|Os06g22340.1,Orysa4|Os08g05610.1,Orysa4|Os01g24810.1  
Orysa4|Os11g28060.1,Orysa4|Os02g12530.1  
Orysa4|Os02g12890.1  
AT4G31970,AT4G31950,AT4G31940,AT3G25180,AT2G25160  
Orysa4|Os09g26960.1,Orysa4|Os09g26940.1,Orysa4|Os09g08990.1,Orysa4|Os08g35510.1,Orysa4|Os09g26980.1  
AT1G31800 Orysa4|Os02g57290.1  
Orysa4|Os03g14400.1,Orysa4|Os10g08540.1,Orysa4|Os10g05490.1,Orysa4|Os12g09500.1,Orysa4|Os10g10720.1,Orysa4|Os06g19070.1,Orysa4|Os03g14560.1,Orysa4|Os02g29720.1,Orysa4|Os10g09090.1  
Orysa4|Os01g65750.1  
Orysa4|Os02g26770.1,Orysa4|Os02g26810.1  
AT1G13710,AT1G74110  
AT4G36220,AT5G04330 Orysa4|Os03g02180.1,Orysa4|Os10g36848.1  
Orysa4|Os06g35620.1  
Orysa4|Os07g19150.1  
AT3G53130 Orysa4|Os06g34990.1  
Orysa4|Os04g10160.1,Orysa4|Os04g09920.1,Orysa4|Os03g53060.1,Orysa4|Os09g10340.1,Orysa4|Os02g12550.1,Orysa4|Os02g12540.1,Orysa4|Os12g44290.1,Orysa4|Os02g09260.1,Orysa4|Os02g09240.1,Orysa4|Os02g09270.1,Orysa4|Os02g09250.1,Orysa4|Os02g09200.1,Orysa4|Os02g38930.1,Orysa4|Os02g38940.1,Orysa4|Os02g09310.1,Orysa4|Os02g09290.1,Orysa4|Os06g45960.1,Orysa4|Os06g43384.1,Orysa4|Os06g43410.1,Orysa4|Os06g43350.1,Orysa4|Os06g43400.1,Orysa4|Os06g43304.1,Orysa4|Os06g43320.1,Orysa4|Os02g09410.1,Orysa4|Os02g09390.1,Orysa4|Os02g09400.1,Orysa4|Os06g43480.1,Orysa4|Os06g43490.1,Orysa4|Os11g41710.1,Orysa4|Os06g43420.1,Orysa4|Os01g27890.1,Orysa4|Os06g43520.1,Orysa4|Os06g30179.1,Orysa4|Os06g30500.1,Orysa4|Os10g09160.1,Orysa4|Os01g72740.1,Orysa4|Os01g72760.1,Orysa4|Os01g72730.1,Orysa4|Os03g39760.1,Orysa4|Os03g39690.1,Orysa4|Os03g39650.1,Orysa4|Os07g11870.1,Orysa4|Os07g11970.1,Orysa4|Os07g11890.1,Orysa4|Os07g11739.1,Orysa4|Os02g36190.1,Orysa4|Os02g36150.1,Orysa4|Os02g32770.1,Orysa4|Os10g30380.1,Orysa4|Os10g30390.1,Orysa4|Os10g30410.1,Orysa4|Os02g17760.1  
AT2G42250,AT5G06905,AT1G50560,AT1G50520,AT3G32047,AT2G14100,AT3G20960,AT2G05180,AT4G15360,AT3G20130,AT3G20950,AT3G20940,AT4G15350,AT5G47990,AT2G27010,AT2G27000,AT3G20100,AT3G20110,AT3G20140,AT3G20080,AT4G15380,AT5G42580,AT4G15330,AT1G28430,AT3G20090,AT3G20120  
Orysa4|Os10g09100.1  
Orysa4|Os07g19130.1  
AT1G74540,AT1G74550  
AT2G15260,AT4G13490 Orysa4|Os09g33670.1,Orysa4|Os08g42640.1  
AT3G05545,AT2G47700 Orysa4|Os01g24880.1,Orysa4|Os05g06270.1  
Orysa4|Os02g47350.1  
AT5G19200,AT3G06060  
AT3G05570,AT4G39235,AT2G21640  
Orysa4|Os08g10400.1  
Orysa4|Os03g53390.1  
Orysa4|Os06g02560.1  
AT3G13960 Orysa4|Os02g53690.1  
AT1G09290 Orysa4|Os02g45090.1  
AT2G38250,AT5G01380  
Orysa4|Os02g47370.1,Orysa4|Os04g51320.1  
Orysa4|Os04g46190.1,Orysa4|Os02g43760.1  
AT4G17510 Orysa4|Os04g57190.1  
AT5G41650,AT1G64185 Orysa4|Os06g06420.1  
AT2G39300,AT3G55060 Orysa4|Os07g48700.1,Orysa4|Os03g20580.1  
Orysa4|Os02g52314.1  
Orysa4|Os11g40660.1,Orysa4|Os03g19270.1  
AT1G68300,AT3G25930 Orysa4|Os01g32780.1

AT1G09740  
AT3G11930,AT3G58450 Orysa4|Os03g53900.1  
Orysa4|Os10g29900.1,Orysa4|Os10g30150.1  
AT3G62550  
Orysa4|Os05g12710.1,Orysa4|Os01g19820.1,Orysa4|Os05g28740.1  
AT1G26760  
Orysa4|Os09g25010.1  
Orysa4|Os03g07260.1  
Orysa4|Os08g33650.1  
AT2G07714,AT1G66170,AT2G01810 Orysa4|Os03g50780.1  
AT5G22260 Orysa4|Os09g27620.1  
AT1G33420 Orysa4|Os11g12650.1  
AT5G53750,AT4G27460 Orysa4|Os04g58310.1,Orysa4|Os10g35630.1  
AT2G36500,AT3G52950 Orysa4|Os11g06930.1,Orysa4|Os12g07190.1  
AT5G50530,AT5G50640,AT5G63490 Orysa4|Os11g30350.1,Orysa4|Os01g69900.1  
Orysa4|Os01g73040.1  
AT1G08840 Orysa4|Os04g49860.1  
AT5G04080 Orysa4|Os05g31470.1  
AT1G64660 Orysa4|Os10g37340.1  
AT5G63480 Orysa4|Os04g31910.1  
Orysa4|Os03g14910.1  
AT5G19500 Orysa4|Os07g46780.1  
AT1G32500  
Orysa4|Os01g03650.1  
AT5G12920 Orysa4|Os02g37856.1  
AT1G28540 Orysa4|Os06g33340.1  
Orysa4|Os06g37440.1,Orysa4|Os02g12800.1  
AT1G57720,AT1G09640  
Orysa4|Os09g28130.1,Orysa4|Os11g05510.1,Orysa4|Os12g05730.1  
Orysa4|Os09g28150.1  
AT5G04180  
AT1G08065,AT5G56330,AT1G08080,AT2G28210,AT4G20990,AT4G21000  
Orysa4|Os08g36680.1,Orysa4|Os08g36630.1,Orysa4|Os08g32780.1,Orysa4|Os08g32750.1,Orysa4|Os08  
g32840.1  
AT3G52720 Orysa4|Os04g33660.1,Orysa4|Os02g33030.1  
AT5G53850 Orysa4|Os11g29370.1  
Orysa4|Os01g01120.1  
AT1G32270  
AT5G16830 Orysa4|Os02g47440.1  
AT4G17730,AT5G46860 Orysa4|Os01g15110.1  
AT1G24160,AT1G70100,AT1G70950,AT1G23060,AT3G27350,AT5G40700,AT3G01710,AT3G26050  
Orysa4|Os02g35230.1  
AT2G21430,AT4G39090,AT4G16190 Orysa4|Os04g24600.1,Orysa4|Os02g27030.1  
Orysa4|Os04g12660.1,Orysa4|Os04g13090.1  
AT5G50260,AT3G48340,AT3G48350 Orysa4|Os08g44270.1,Orysa4|Os11g14900.1,Orysa4|Os01g67980.1  
AT3G54940  
AT1G20850,AT4G35350 Orysa4|Os01g73980.1,Orysa4|Os05g01810.1  
AT2G22160 Orysa4|Os04g55650.1  
AT2G34080,AT1G29090,AT1G29110,AT1G29080  
AT2G27395 Orysa4|Os05g43600.1  
Orysa4|Os12g25680.1  
Orysa4|Os07g01800.1,Orysa4|Os03g54130.1,Orysa4|Os01g22670.1,Orysa4|Os01g24560.1,Orysa4|Os01  
g11830.1,Orysa4|Os01g24550.1,Orysa4|Os01g24600.1,Orysa4|Os01g22680.1,Orysa4|Os01g11840.1,Orysa4|Os11g2  
3770.1,Orysa4|Os09g21370.1,Orysa4|Os04g01710.1,Orysa4|Os01g42790.1  
AT4G11320,AT4G11310,AT4G23520  
AT3G49340,AT2G27420  
AT1G06260  
Orysa4|Os09g38920.1  
AT3G45310,AT5G60360 Orysa4|Os09g27030.1  
AT5G43060,AT1G47128,AT4G36880 Orysa4|Os04g57490.1,Orysa4|Os04g57440.1  
AT5G45890  
AT3G19400,AT3G19390,AT3G43960  
AT1G09850 Orysa4|Os05g43230.1  
Orysa4|Os09g39100.1,Orysa4|Os09g39110.1,Orysa4|Os09g39170.1,Orysa4|Os09g39090.1,Orysa4|Os09  
g39140.1,Orysa4|Os09g39120.1,Orysa4|Os09g39070.1,Orysa4|Os09g39060.1,Orysa4|Os09g39160.1  
Orysa4|Os01g13920.1,Orysa4|Os07g29760.1  
Orysa4|Os02g48450.1  
AT2G42370,AT3G58110 Orysa4|Os06g34710.1  
AT1G02650,AT4G02100,AT3G62570,AT2G47440 Orysa4|Os07g49000.1,Orysa4|Os03g19200.1  
Orysa4|Os11g07290.1,Orysa4|Os02g27880.1,Orysa4|Os02g27820.1  
Orysa4|Os01g39770.1  
AT4G01420  
AT5G55990,AT4G26570 Orysa4|Os12g40510.1,Orysa4|Os03g42840.1  
AT4G26560 Orysa4|Os02g27940.1  
AT1G64480  
Orysa4|Os01g41510.1,Orysa4|Os05g45810.1,Orysa4|Os02g18880.1,Orysa4|Os03g33570.1,Orysa4|Os02  
g18930.1  
AT5G24270  
AT4G16350  
AT4G33000  
AT4G17615,AT5G47100  
AT2G43490,AT3G59570 Orysa4|Os01g01010.1

AT1G54770,AT5G30495 Orysa4|Os02g49780.1  
AT2G21195Orysa4|Os07g16150.1  
AT3G29770 Orysa4|Os07g41230.1  
AT4G09900,AT1G33990 Orysa4|Os08g01850.1  
AT3G10870 Orysa4|Os12g02510.1,Orysa4|Os11g02580.1,Orysa4|Os12g02500.1  
AT4G16690,AT5G58310  
AT1G69240,AT1G26360  
AT4G24700 Orysa4|Os02g38170.1  
AT1G04590 Orysa4|Os12g02950.1  
AT4G21190Orysa4|Os01g55290.1  
Orysa4|Os03g13400.1  
Orysa4|Os02g31890.1  
AT5G22890 Orysa4|Os04g08290.1  
AT2G01940,AT1G25250,AT1G68130 Orysa4|Os09g27650.1,Orysa4|Os08g36390.1  
AT5G44160,AT1G03840 Orysa4|Os01g14010.1  
Orysa4|Os02g36360.1  
AT5G03150  
AT4G02670  
Orysa4|Os01g09850.1  
Orysa4|Os02g45054.1,Orysa4|Os04g47860.1,Orysa4|Os10g28330.1  
Orysa4|Os01g39110.1  
AT5G66730,AT3G50700 Orysa4|Os07g39310.1,Orysa4|Os03g10140.1  
AT1G55110,AT3G13810  
AT1G14580,AT2G02080,AT2G02070 Orysa4|Os08g44050.1,Orysa4|Os09g38340.1  
Orysa4|Os01g70870.1  
AT5G60470,AT3G45260  
AT1G45110Orysa4|Os10g27450.1  
AT5G26880 Orysa4|Os08g39600.1  
AT3G60850 Orysa4|Os03g14290.1  
AT4G38800 Orysa4|Os06g02220.1  
AT4G34840  
AT4G33410 Orysa4|Os10g25360.1  
AT5G27990,AT3G22510 Orysa4|Os08g39820.1  
AT4G03080 Orysa4|Os05g05240.1  
AT1G03445  
AT1G08420,AT2G27210 Orysa4|Os03g44500.1,Orysa4|Os12g42310.1  
AT4G16790 Orysa4|Os10g41250.1  
AT3G51640,AT3G51650 Orysa4|Os12g02130.1,Orysa4|Os11g02190.1  
Orysa4|Os01g53710.1,Orysa4|Os05g44910.1  
AT2G35680  
Orysa4|Os10g41240.1  
AT5G56610 Orysa4|Os06g05870.1  
AT2G48070 Orysa4|Os05g33520.1  
Orysa4|Os09g29190.1  
AT3G21110  
AT2G34680 Orysa4|Os07g05470.1  
AT5G01510 Orysa4|Os01g04860.1  
AT2G23470  
AT5G49820 Orysa4|Os05g34650.1,Orysa4|Os01g66350.1  
AT1G49170 Orysa4|Os04g58970.1  
Orysa4|Os12g18140.1  
AT2G06990 Orysa4|Os11g07500.1  
AT1G59760  
AT3G46960 Orysa4|Os02g06500.1  
Orysa4|Os06g45660.1  
AT1G31160  
AT3G56490 Orysa4|Os01g59750.1,Orysa4|Os03g20630.1  
AT2G27460 Orysa4|Os04g33690.1,Orysa4|Os05g37120.1  
AT3G17740 Orysa4|Os02g53270.1  
Orysa4|Os03g13030.1  
AT1G27480 Orysa4|Os03g52010.1  
Orysa4|Os02g37710.1,Orysa4|Os02g37750.1,Orysa4|Os02g37770.1,Orysa4|Os02g37654.1,Orysa4|Os02g37800.1,Orysa4|Os02g37760.1,Orysa4|Os10g08040.1  
Orysa4|Os10g08170.1  
Orysa4|Os10g08050.1,Orysa4|Os10g08018.1  
Orysa4|Os01g71800.1,Orysa4|Os10g08026.1  
Orysa4|Os06g09570.1,Orysa4|Os07g01920.1  
AT3G23860  
AT1G10300,AT1G50920  
Orysa4|Os11g06820.1  
AT2G38120  
AT5G01240 Orysa4|Os05g37470.1,Orysa4|Os01g63770.1  
AT1G77690,AT2G21050 Orysa4|Os03g14080.1  
Orysa4|Os10g05690.1  
AT5G41070,AT3G26932  
AT3G62800  
Orysa4|Os05g05790.1  
Orysa4|Os09g16260.1  
Orysa4|Os09g33460.1  
AT2G28380  
Orysa4|Os08g29530.1  
Orysa4|Os10g33970.1

Orysa4|Os01g56520.1  
AT3G23820 Orysa4|Os08g41440.1,Orysa4|Os09g32670.1  
AT4G30440 Orysa4|Os06g08810.1,Orysa4|Os02g54890.1  
AT1G02000,AT4G00110,AT2G45310,AT4G12250 Orysa4|Os03g14540.1  
AT3G09250 Orysa4|Os01g54960.1,Orysa4|Os02g54710.1  
AT2G42770 Orysa4|Os04g48280.1,Orysa4|Os01g53060.1  
Orysa4|Os01g58060.1,Orysa4|Os02g24580.1  
Orysa4|Os02g24590.1  
AT5G58210,AT3G52170 Orysa4|Os02g42550.1  
AT1G78110,AT1G22230 Orysa4|Os02g51720.1,Orysa4|Os09g20420.1  
AT2G41250 Orysa4|Os07g46520.1  
Orysa4|Os03g24070.1  
AT1G14310 Orysa4|Os08g07300.1  
AT1G72490,AT1G17400 Orysa4|Os03g29270.1,Orysa4|Os07g42290.1,Orysa4|Os03g08290.1  
AT2G04340 Orysa4|Os09g30140.1  
AT4G02530 Orysa4|Os06g49160.1  
AT2G17440,AT4G35470 Orysa4|Os08g40090.1  
AT2G19330,AT4G29880,AT4G26050 Orysa4|Os04g51580.1  
Orysa4|Os05g23250.1  
Orysa4|Os10g42190.1  
AT3G11330,AT5G05850 Orysa4|Os02g38040.1,Orysa4|Os04g40080.1  
AT1G69545  
AT3G26500,AT1G12970  
Orysa4|Os07g37660.1  
Orysa4|Os01g71114.1  
AT5G45510  
Orysa4|Os03g63220.1  
AT3G18165 Orysa4|Os01g16010.1  
AT5G36880 Orysa4|Os02g32490.1,Orysa4|Os04g33190.1  
AT2G45730 Orysa4|Os04g02150.1  
AT2G38710 Orysa4|Os10g42250.1  
AT3G01060 Orysa4|Os05g43650.1  
AT1G17145,AT1G78420  
Orysa4|Os02g14720.1  
Orysa4|Os06g06120.1  
AT5G14250 Orysa4|Os08g02550.1  
Orysa4|Os09g08130.1  
AT5G48220,AT2G04400  
Orysa4|Os04g39270.1  
AT1G43600,AT1G43610,AT3G50376,AT5G54210,AT1G20320,AT3G19600,AT2G04930,AT3G17550,AT2G02290,AT5G23470,AT3G15330  
Orysa4|Os02g55280.1  
AT5G58000 Orysa4|Os05g32430.1  
AT4G01460,AT3G61950,AT2G46810  
Orysa4|Os05g51820.1  
AT5G46690 Orysa4|Os04g50090.1,Orysa4|Os02g46560.1  
AT5G53210 Orysa4|Os02g15760.1,Orysa4|Os06g33450.1  
AT3G24140 Orysa4|Os05g50900.1  
AT3G06120  
AT1G72210,AT1G22490,AT5G65320  
Orysa4|Os08g37730.1,Orysa4|Os09g29360.1,Orysa4|Os02g52190.1,Orysa4|Os10g23050.1,Orysa4|Os03g08930.1  
AT1G76570 Orysa4|Os09g12540.1  
AT3G61470  
AT5G54270 Orysa4|Os07g37550.1  
AT1G29920,AT1G29910,AT1G29930,AT2G34420,AT2G34430  
Orysa4|Os01g52240.1,Orysa4|Os01g41710.1,Orysa4|Os09g17740.1  
AT1G15820  
Orysa4|Os02g52650.1  
AT1G61520 Orysa4|Os02g10390.1  
Orysa4|Os06g28960.1  
AT1G19150 Orysa4|Os09g26810.1  
AT3G47470  
AT3G54890 Orysa4|Os06g21590.1  
AT4G10340 Orysa4|Os11g13890.1  
AT1G45474  
AT2G05100,AT2G05070,AT3G27690  
AT5G01530,AT3G08940 Orysa4|Os07g37240.1  
AT2G40100  
AT5G28450  
Orysa4|Os04g38410.1  
AT5G17240 Orysa4|Os07g28840.1  
AT2G15820 Orysa4|Os02g47360.1  
AT1G29850  
Orysa4|Os05g47446.1  
AT1G11240 Orysa4|Os03g23020.1  
AT2G19450 Orysa4|Os06g36800.1,Orysa4|Os05g10810.1  
AT1G01730 Orysa4|Os04g47010.1  
AT1G72440 Orysa4|Os09g02810.1  
AT1G08560 Orysa4|Os03g52650.1  
AT5G08080,AT3G03800 Orysa4|Os07g07000.1  
AT1G61290,AT1G11250 Orysa4|Os02g11890.1,Orysa4|Os06g39050.1



AT3G11820,AT3G52400 Orysa4|Os03g57310.1  
Orysa4|Os06g07200.1  
AT2G18260 Orysa4|Os10g28530.1,Orysa4|Os12g08980.1  
AT4G03330  
AT2G47910 Orysa4|Os08g07060.1  
AT3G48560  
Orysa4|Os02g30630.1,Orysa4|Os04g32010.1  
Orysa4|Os06g51280.1  
Orysa4|Os09g30446.1  
AT1G79610,AT1G54370 Orysa4|Os09g11450.1  
Orysa4|Os03g05650.1,Orysa4|Os06g31290.1,Orysa4|Os08g29340.1  
AT3G24250  
Orysa4|Os04g45980.1,Orysa4|Os02g43540.1  
Orysa4|Os04g20820.1,Orysa4|Os01g18780.1  
AT2G30560  
AT1G11850  
Orysa4|Os09g25720.1,Orysa4|Os09g25710.1  
Orysa4|Os10g04870.1,Orysa4|Os12g42170.1  
Orysa4|Os01g68730.1  
AT4G15460  
Orysa4|Os09g11990.1,Orysa4|Os09g11970.1  
Orysa4|Os05g41870.1  
Orysa4|Os08g37630.1  
Orysa4|Os02g02870.1  
Orysa4|Os01g18340.1  
AT1G53640  
Orysa4|Os07g25810.1  
Orysa4|Os01g06310.1  
AT1G75550 Orysa4|Os06g22050.1  
Orysa4|Os09g20960.1,Orysa4|Os02g58180.1  
Orysa4|Os09g38870.1  
AT5G58470 Orysa4|Os01g07070.1  
AT2G21060,AT4G38680  
Orysa4|Os03g14620.1  
AT4G30450,AT4G30460 Orysa4|Os09g25690.1  
AT3G44950 Orysa4|Os01g04180.1  
Orysa4|Os01g69020.1,Orysa4|Os12g29160.1  
AT2G11005 Orysa4|Os07g49070.1  
Orysa4|Os08g31360.1,Orysa4|Os08g05070.1  
Orysa4|Os06g10870.1,Orysa4|Os06g09870.1,Orysa4|Os10g31480.1,Orysa4|Os10g31420.1,Orysa4|Os10g31440.1,Orysa4|Os10g31490.1,Orysa4|Os10g31500.1  
AT1G15830  
Orysa4|Os01g68740.1  
Orysa4|Os06g02970.1,Orysa4|Os06g03590.1,Orysa4|Os02g55160.1  
AT1G53625  
Orysa4|Os03g19600.1,Orysa4|Os07g48910.1  
AT3G42130 Orysa4|Os07g20160.1  
Orysa4|Os10g17454.1  
AT1G77030 Orysa4|Os07g24930.1  
Orysa4|Os04g44120.1,Orysa4|Os07g04940.1  
Orysa4|Os07g32700.1,Orysa4|Os07g32710.1  
AT1G02710,AT5G40490,AT1G27710  
AT5G19960  
AT1G15840 Orysa4|Os01g54714.1  
AT1G74230,AT5G61030  
Orysa4|Os10g31330.1,Orysa4|Os12g13890.1  
Orysa4|Os06g21220.1,Orysa4|Os06g21210.1,Orysa4|Os06g21230.1,Orysa4|Os06g21240.1,Orysa4|Os06g21140.1,Orysa4|Os06g21270.1,Orysa4|Os06g21310.1  
Orysa4|Os02g17860.1  
Orysa4|Os11g47494.1  
Orysa4|Os01g36570.1  
AT1G07135,AT3G04640,AT5G25425 Orysa4|Os01g68270.1  
Orysa4|Os06g42070.1,Orysa4|Os07g04380.1  
AT5G61660,AT3G15400  
Orysa4|Os10g28960.1  
Orysa4|Os05g09060.1,Orysa4|Os05g41820.1,Orysa4|Os03g07270.1,Orysa4|Os03g24130.1,Orysa4|Os02g35540.1  
Orysa4|Os12g13860.1,Orysa4|Os12g13840.1  
Orysa4|Os07g37380.1,Orysa4|Os08g24800.1  
Orysa4|Os01g08530.1  
AT3G14480  
Orysa4|Os09g11880.1  
Orysa4|Os03g50790.1  
AT1G04800  
Orysa4|Os03g64010.1,Orysa4|Os12g39130.1  
Orysa4|Os09g30290.1  
Orysa4|Os10g31380.1,Orysa4|Os10g31460.1  
Orysa4|Os03g01320.1  
Orysa4|Os07g41100.1  
AT1G62240 Orysa4|Os11g27970.1  
Orysa4|Os06g35570.1,Orysa4|Os02g36749.1  
AT5G07530,AT5G07540

Orysa4|Os03g01330.1  
Orysa4|Os10g31540.1,Orysa4|Os10g31510.1,Orysa4|Os10g31660.1,Orysa4|Os10g31640.1,Orysa4|Os10g31690.1,Orysa4|Os10g31710.1,Orysa4|Os10g31720.1,Orysa4|Os10g31680.1,Orysa4|Os10g31730.1,Orysa4|Os10g31620.1,Orysa4|Os10g31560.1,Orysa4|Os10g31570.1,Orysa4|Os10g31370.1  
Orysa4|Os02g37540.1,Orysa4|Os02g37520.1,Orysa4|Os02g37550.1  
Orysa4|Os09g31434.1  
Orysa4|Os03g40910.1  
AT2G05510,AT2G05440,AT2G05380,AT2G05520,AT2G05530,AT2G05540  
Orysa4|Os01g32540.1,Orysa4|Os02g43640.1,Orysa4|Os05g12690.1  
Orysa4|Os11g43630.1  
Orysa4|Os11g25620.1  
AT3G55790 Orysa4|Os06g23040.1  
Orysa4|Os12g42930.1,Orysa4|Os02g37400.1  
Orysa4|Os12g43510.1  
Orysa4|Os02g20040.1,Orysa4|Os04g19960.1  
Orysa4|Os06g51440.1  
AT5G46730  
AT5G33390 Orysa4|Os04g08570.1  
AT2G17870,AT4G36020  
AT1G76965  
Orysa4|Os06g41740.1  
AT4G29030,AT1G04660,AT4G29020 Orysa4|Os12g44270.1,Orysa4|Os03g58850.1,Orysa4|Os07g09620.1  
Orysa4|Os08g34390.1  
Orysa4|Os07g32680.1  
Orysa4|Os01g74340.1  
AT4G15150 Orysa4|Os07g48602.1  
AT2G14160,AT4G16240  
Orysa4|Os10g31630.1  
AT2G21660,AT4G39260 Orysa4|Os03g46770.1,Orysa4|Os12g43600.1  
AT4G01985  
Orysa4|Os04g56040.1,Orysa4|Os04g56030.1,Orysa4|Os04g56010.1,Orysa4|Os04g56000.1,Orysa4|Os04g55980.1,Orysa4|Os11g40520.1,Orysa4|Os03g18490.1,Orysa4|Os11g40270.1,Orysa4|Os01g15210.1,Orysa4|Os07g28010.1,Orysa4|Os07g01470.1  
AT5G16940 Orysa4|Os09g23370.1  
AT4G30600 Orysa4|Os08g37444.1  
AT3G47390 Orysa4|Os02g27340.1  
AT1G16880  
AT5G04740 Orysa4|Os12g05650.1  
Orysa4|Os08g14440.1  
AT2G03390 Orysa4|Os08g07540.1,Orysa4|Os01g55880.1,Orysa4|Os08g38450.1  
AT1G78230 Orysa4|Os03g09070.1,Orysa4|Os10g22980.1  
AT4G03260 Orysa4|Os05g42220.1,Orysa4|Os07g01550.1  
AT4G22990,AT4G11810,AT1G63010 Orysa4|Os02g45520.1,Orysa4|Os04g48390.1,Orysa4|Os06g03860.1  
Orysa4|Os09g34990.1  
AT4G12340 Orysa4|Os05g01300.1  
AT3G07270 Orysa4|Os04g56710.1  
AT3G25430 Orysa4|Os08g34160.1  
AT5G51740 Orysa4|Os02g50220.1  
Orysa4|Os10g13700.1  
AT5G65690,AT4G37870 Orysa4|Os03g15050.1  
AT3G05500 Orysa4|Os07g47510.1  
AT2G47780,AT1G67360  
AT3G32940 Orysa4|Os08g01070.1  
AT3G50090,AT3G50100,AT5G67240,AT5G05540 Orysa4|Os04g55700.1  
AT5G55220 Orysa4|Os06g20320.1  
AT3G20870 Orysa4|Os02g10230.1  
Orysa4|Os08g01030.1  
AT1G15020,AT2G01270 Orysa4|Os05g47930.1  
AT1G04440,AT5G43320 Orysa4|Os02g56560.1  
AT4G08800,AT2G19470  
AT4G26100,AT5G57015  
Orysa4|Os10g33650.1  
AT4G28880,AT4G28860 Orysa4|Os01g13060.1,Orysa4|Os02g17910.1  
AT3G23340,AT4G14340,AT4G28540,AT1G03930,AT5G44100  
AT1G72710 Orysa4|Os05g51560.1,Orysa4|Os01g38950.1,Orysa4|Os01g51200.1  
Orysa4|Os06g05000.1,Orysa4|Os06g04950.1,Orysa4|Os06g05020.1,Orysa4|Os06g04990.1  
AT5G25940  
AT3G50110  
AT3G19420 Orysa4|Os12g21890.1  
AT5G39400  
Orysa4|Os02g35020.1  
AT4G33330 Orysa4|Os03g08600.1  
AT3G18660,AT1G77130 Orysa4|Os01g65780.1  
AT1G54940,AT1G08990  
AT1G27330,AT1G27350 Orysa4|Os12g32950.1  
AT3G03710 Orysa4|Os07g07310.1  
AT5G14580  
AT5G49390  
AT5G49370,AT5G49380,AT3G06670 Orysa4|Os05g06470.1,Orysa4|Os01g23590.1  
AT5G64850,AT5G09960 Orysa4|Os10g26540.1,Orysa4|Os03g07380.1  
AT5G19473 Orysa4|Os09g23750.1,Orysa4|Os11g39010.1  
AT4G25230,AT5G51450 Orysa4|Os07g30100.1

AT5G65170,AT4G39720,AT1G35830  
Orysa4|Os07g43140.1,Orysa4|Os03g26990.1,Orysa4|Os06g45570.1,Orysa4|Os09g20460.1,Orysa4|Os08  
g31660.1,Orysa4|Os02g51740.1  
AT1G06530,AT3G58840  
Orysa4|Os09g25380.1  
Orysa4|Os01g46810.1  
AT5G27330,AT3G05130  
AT3G16000 Orysa4|Os05g08790.1,Orysa4|Os01g08510.1  
AT5G27220  
Orysa4|Os04g07150.1,Orysa4|Os04g07280.1,Orysa4|Os04g07890.1  
AT4G31570,AT1G24460  
Orysa4|Os03g48490.1  
AT4G32190 Orysa4|Os02g09340.1  
Orysa4|Os02g50790.1  
AT1G05320,AT2G32240 Orysa4|Os04g52460.1  
AT5G08580 Orysa4|Os02g12880.1  
AT4G27790 Orysa4|Os04g58480.1  
Orysa4|Os01g39134.1  
AT2G25290,AT4G32070 Orysa4|Os08g20020.1,Orysa4|Os09g03890.1,Orysa4|Os09g38390.1  
AT4G30480 Orysa4|Os10g34540.1  
AT5G20360  
AT1G62390 Orysa4|Os09g04990.1  
AT3G23900 Orysa4|Os01g01150.1  
AT5G09650 Orysa4|Os02g52940.1  
AT4G01650 Orysa4|Os01g74010.1  
Orysa4|Os04g12060.1,Orysa4|Os04g12220.1  
Orysa4|Os01g38910.1,Orysa4|Os01g38850.1,Orysa4|Os04g25650.1,Orysa4|Os04g25060.1,Orysa4|Os07  
g35780.1,Orysa4|Os04g56430.1,Orysa4|Os07g35640.1,Orysa4|Os10g18280.1,Orysa4|Os04g09780.1  
Orysa4|Os12g41520.1,Orysa4|Os12g41410.1,Orysa4|Os03g36650.1  
AT5G48540  
Orysa4|Os03g16960.1,Orysa4|Os03g16950.1,Orysa4|Os08g04210.1,Orysa4|Os08g04240.1,Orysa4|Os08  
g04250.1,Orysa4|Os03g19840.1,Orysa4|Os05g02200.1  
AT4G20520,AT4G20700  
AT4G23170,AT1G63550,AT1G63570,AT1G63600,AT1G63560,AT1G63590,AT1G63580,AT5G41290,AT5G41280,AT5  
G41300,AT1G61750,AT2G31620,AT3G21960,AT3G21940,AT4G20670,AT3G21990,AT4G20610,AT4G20710,AT4G20  
560,AT4G20640,AT4G20530,AT4G20540,AT4G20620,AT4G20590,AT4G20600,AT4G20570,AT4G20630,AT4G20580,  
AT4G20550,AT4G20650,AT3G21980,AT3G22000,AT4G20680,AT3G22010,AT3G29040,AT3G21970,AT3G22030,AT3  
G22040,AT3G22050,AT3G22020,AT3G21930,AT3G21920,AT3G21910,AT3G21900,AT3G29050,AT3G22060,AT3G58  
310  
AT5G64050 Orysa4|Os02g02860.1  
AT2G28605 Orysa4|Os04g35530.1  
AT5G24350 Orysa4|Os12g13150.1  
AT1G51740 Orysa4|Os12g05810.1,Orysa4|Os04g44810.1  
AT4G14440,AT4G14430,AT1G65520 Orysa4|Os01g10830.1,Orysa4|Os05g45300.1  
AT1G55620 Orysa4|Os08g38980.1  
AT4G35440 Orysa4|Os01g50860.1  
AT1G55090 Orysa4|Os07g07260.1  
AT5G41220,AT5G41210,AT5G41240 Orysa4|Os11g37730.1  
AT5G52570,AT4G25700 Orysa4|Os10g38940.1,Orysa4|Os03g03370.1,Orysa4|Os04g48880.1  
AT5G49400 Orysa4|Os11g09310.1  
Orysa4|Os01g01730.1  
AT3G01610 Orysa4|Os06g01980.1  
AT3G27120  
AT1G03000 Orysa4|Os04g52690.1  
AT3G09840,AT5G03340,AT3G53230 Orysa4|Os03g05730.1,Orysa4|Os10g30580.1  
Orysa4|Os02g06490.1  
AT4G27680,AT5G53540 Orysa4|Os06g50050.1  
Orysa4|Os08g31870.1  
AT2G45500 Orysa4|Os06g03940.1  
Orysa4|Os09g39034.1  
AT5G08470 Orysa4|Os08g44240.1  
AT2G03670 Orysa4|Os05g31220.1,Orysa4|Os04g42110.1  
AT2G27600 Orysa4|Os01g04814.1  
AT3G56690  
AT2G37910 Orysa4|Os08g29680.1  
Orysa4|Os01g47800.1  
AT1G08270  
AT1G80350 Orysa4|Os01g49000.1  
AT2G34560 Orysa4|Os01g48270.1,Orysa4|Os01g55260.1  
AT2G26520 Orysa4|Os05g34510.1,Orysa4|Os01g66544.1  
AT3G57500 Orysa4|Os03g48960.1  
Orysa4|Os01g42980.1  
AT1G52370,AT4G28360  
AT4G26840  
AT5G55160 Orysa4|Os01g68940.1,Orysa4|Os01g68950.1  
AT5G48700,AT5G48710,AT5G55855,AT2G32765,AT5G55170  
Orysa4|Os03g17920.1  
AT3G52260  
Orysa4|Os04g02510.1  
AT5G54630,AT4G27240,AT1G11490  
AT1G75710 Orysa4|Os04g59380.1  
AT2G29660 Orysa4|Os03g15790.1

Orysa4|Os10g40584.1,Orysa4|Os02g44280.1,Orysa4|Os08g24340.1  
Orysa4|Os11g30340.1,Orysa4|Os11g06840.1  
AT1G27595 Orysa4|Os01g49940.1  
AT5G01400 Orysa4|Os07g49320.1  
AT1G78540,AT1G17040 Orysa4|Os10g41770.1  
AT1G63050,AT1G12640 Orysa4|Os02g45344.1  
AT3G26740 Orysa4|Os01g01340.1  
AT2G18410 Orysa4|Os03g10460.1  
AT5G01160 Orysa4|Os10g35190.1  
AT1G04690 Orysa4|Os02g57240.1  
AT4G23895 Orysa4|Os05g51710.1  
AT5G49010 Orysa4|Os05g05150.1  
AT2G32600 Orysa4|Os03g15700.1  
AT5G03345 Orysa4|Os12g37880.1  
Orysa4|Os02g50830.1  
AT1G70220,AT1G24050  
AT2G43970  
Orysa4|Os08g42980.1  
Orysa4|Os12g12360.1  
AT5G46250 Orysa4|Os01g55170.1  
AT3G19090 Orysa4|Os07g01260.1,Orysa4|Os03g36900.1  
AT5G40660 Orysa4|Os07g44940.1  
Orysa4|Os01g39030.1,Orysa4|Os12g41320.1  
AT1G22015,AT1G77810 Orysa4|Os09g27950.1,Orysa4|Os02g35870.1  
AT1G11730  
AT1G33430 Orysa4|Os05g35274.1  
AT2G32430,AT1G05170,AT4G26940 Orysa4|Os03g38050.1  
Orysa4|Os05g11060.1  
AT1G32930  
Orysa4|Os06g46570.1,Orysa4|Os02g06840.1  
Orysa4|Os11g43340.1  
Orysa4|Os08g02370.1  
AT1G53290,AT3G14960 Orysa4|Os06g06280.1  
AT2G26100  
AT5G53340 Orysa4|Os08g29710.1  
AT2G25300,AT4G32120 Orysa4|Os06g08005.1,Orysa4|Os06g07905.1  
AT3G13050 Orysa4|Os04g51970.1,Orysa4|Os09g38690.1  
Orysa4|Os03g43720.1,Orysa4|Os07g38400.1  
AT5G09480 Orysa4|Os07g40910.1  
AT1G17720,AT1G51690 Orysa4|Os06g36770.1,Orysa4|Os02g13110.1,Orysa4|Os01g41630.1  
AT1G78280 Orysa4|Os03g27250.1  
AT3G63510,AT5G47970 Orysa4|Os04g21000.1  
AT3G10850  
AT2G43430,AT2G31350,AT1G06130 Orysa4|Os09g34100.1  
Orysa4|Os03g21460.1  
AT4G20130 Orysa4|Os05g50980.1  
AT3G18580 Orysa4|Os01g45530.1  
Orysa4|Os03g19340.1  
AT5G49430  
AT2G47410  
AT1G75540,AT4G39070 Orysa4|Os02g43170.1,Orysa4|Os04g45690.1,Orysa4|Os06g49880.1  
AT1G78600 Orysa4|Os06g05890.1  
AT4G10240  
AT4G38960,AT2G21320 Orysa4|Os09g35880.1  
Orysa4|Os05g11510.1,Orysa4|Os01g10580.1,Orysa4|Os12g10660.1  
AT2G31380,AT1G06040 Orysa4|Os02g39360.1,Orysa4|Os04g41560.1  
AT5G53580  
AT1G06690 Orysa4|Os07g05000.1,Orysa4|Os07g04990.1  
Orysa4|Os10g37330.1  
AT5G54830 Orysa4|Os06g44040.1,Orysa4|Os09g38520.1  
AT5G52590  
Orysa4|Os02g48000.1  
AT5G64816 Orysa4|Os03g08710.1  
AT5G06220,AT3G11560 Orysa4|Os08g37610.1  
AT4G13970 Orysa4|Os07g12520.1  
AT1G60560 Orysa4|Os09g13880.1  
AT5G08030,AT1G74210 Orysa4|Os01g55780.1  
Orysa4|Os07g41150.1  
Orysa4|Os03g40670.1  
AT5G46180 Orysa4|Os03g44150.1  
AT1G80600 Orysa4|Os07g27780.1,Orysa4|Os05g03830.1  
AT4G13030 Orysa4|Os05g19280.1  
AT2G15325 Orysa4|Os03g44000.1,Orysa4|Os02g24720.1  
Orysa4|Os06g06340.1,Orysa4|Os03g59380.1,Orysa4|Os01g12020.1,Orysa4|Os08g03690.1  
AT4G33355  
AT5G01870,AT3G08770 Orysa4|Os05g40010.1,Orysa4|Os01g60740.1  
AT2G18370 Orysa4|Os06g34840.1  
Orysa4|Os12g02330.1,Orysa4|Os11g02400.1,Orysa4|Os12g02340.1  
Orysa4|Os07g27940.1  
Orysa4|Os11g02379.1,Orysa4|Os12g02320.1,Orysa4|Os12g02300.1,Orysa4|Os11g02350.1  
AT2G38540,AT2G38530,AT2G15050,AT3G51600,AT5G59310,AT5G59320,AT5G59330,AT3G51590  
AT5G48640,AT5G48630 Orysa4|Os09g32680.1

AT5G67370 Orysa4|Os03g32490.1  
AT5G11840Orysa4|Os05g46250.1  
AT1G64750,AT5G45010  
Orysa4|Os01g16640.1  
AT2G37120,AT3G53370  
AT3G09735 Orysa4|Os04g33420.1  
AT5G23570 Orysa4|Os12g09580.1  
AT2G41750 Orysa4|Os12g04860.1  
AT3G18035,AT1G48620,AT1G48610 Orysa4|Os05g51850.1  
AT5G56740 Orysa4|Os09g17850.1  
AT3G03270 Orysa4|Os02g53320.1  
AT3G17020 Orysa4|Os05g06500.1  
AT3G53990 Orysa4|Os01g63010.1  
Orysa4|Os05g07810.1,Orysa4|Os01g07590.1  
Orysa4|Os01g25220.1,Orysa4|Os03g31044.1,Orysa4|Os03g31079.1,Orysa4|Os01g56490.1  
AT3G11910,AT5G06600 Orysa4|Os12g30540.1,Orysa4|Os11g36470.1  
Orysa4|Os07g06950.1  
Orysa4|Os03g16700.1  
AT1G07540  
AT5G59430,AT3G46590  
AT3G12560,AT5G13820  
AT3G53790  
AT5G11600  
AT1G19990 Orysa4|Os03g14580.1  
AT5G53440 Orysa4|Os01g46710.1  
AT1G20770 Orysa4|Os04g43040.1  
AT4G25650  
AT3G44880  
Orysa4|Os03g59120.1,Orysa4|Os03g59110.1,Orysa4|Os03g59100.1,Orysa4|Os03g59090.1  
Orysa4|Os03g59152.1  
AT1G22660 Orysa4|Os12g07350.1  
AT5G50310 Orysa4|Os04g40740.1  
AT3G49550,AT5G24610 Orysa4|Os10g36550.1  
AT4G14870 Orysa4|Os04g30220.1,Orysa4|Os08g30830.1  
Orysa4|Os10g30880.1  
AT2G42040 Orysa4|Os06g10570.1,Orysa4|Os02g53360.1  
AT5G02740 Orysa4|Os03g17450.1  
AT5G60690  
AT4G32880,AT1G52150  
Orysa4|Os06g50560.1,Orysa4|Os06g50510.1,Orysa4|Os06g50688.1,Orysa4|Os01g10320.1,Orysa4|Os03  
g55990.1  
AT2G34710,AT1G30490 Orysa4|Os03g43930.1,Orysa4|Os12g41860.1  
AT5G65165  
Orysa4|Os09g20440.1  
AT2G34520  
AT5G40650,AT3G27380  
Orysa4|Os08g02640.1  
AT1G51040,AT1G49340  
Orysa4|Os03g50320.1  
AT5G19050 Orysa4|Os07g11060.1  
Orysa4|Os03g53220.1  
AT3G27730 Orysa4|Os02g40450.1  
AT2G42270,AT1G20960  
Orysa4|Os02g01880.1  
AT5G61140Orysa4|Os03g11470.1  
AT4G28990 Orysa4|Os02g17470.1,Orysa4|Os06g22700.1  
AT1G22040 Orysa4|Os10g21930.1,Orysa4|Os02g36520.1  
AT1G44760 Orysa4|Os01g65440.1,Orysa4|Os05g35380.1  
AT5G43140  
AT4G33905,AT2G14860  
Orysa4|Os12g32330.1  
AT5G19750 Orysa4|Os11g03670.1  
AT3G20740 Orysa4|Os08g04290.1,Orysa4|Os08g04270.1  
AT3G03500,AT5G17570 Orysa4|Os04g48820.1  
AT5G13190 Orysa4|Os02g31100.1  
AT3G56880,AT2G41010 Orysa4|Os03g20440.1,Orysa4|Os01g17050.1  
AT2G20760,AT2G40060,AT3G51890 Orysa4|Os07g27750.1,Orysa4|Os04g58240.1,Orysa4|Os06g51510.1  
AT1G07645 Orysa4|Os03g16940.1  
AT5G50100 Orysa4|Os04g57310.1  
AT3G23100,AT1G61410 Orysa4|Os03g53000.1  
AT5G23535 Orysa4|Os12g04160.1,Orysa4|Os11g04370.1  
AT5G45040 Orysa4|Os07g38000.1  
AT1G04080 Orysa4|Os03g11200.1  
AT5G46400 Orysa4|Os08g29124.1  
AT2G21860 Orysa4|Os01g51860.1  
Orysa4|Os09g06230.1  
AT5G08160 Orysa4|Os09g20640.1  
AT2G13680 Orysa4|Os06g08380.1  
Orysa4|Os03g03610.1  
AT2G36850 Orysa4|Os06g02260.1  
AT1G05570,AT2G31960,AT5G36870,AT5G13000 Orysa4|Os06g51270.1,Orysa4|Os02g58560.1  
Orysa4|Os01g34900.1

Orysa4|Os01g34930.1  
AT3G07160  
AT3G59100,AT1G06490 Orysa4|Os01g34880.1  
AT3G14780  
AT2G30680 Orysa4|Os01g34890.1  
Orysa4|Os01g33960.1,Orysa4|Os03g03620.1  
AT4G03550,AT4G04970 Orysa4|Os01g48200.1,Orysa4|Os01g55040.1  
Orysa4|Os02g21200.1  
AT3G14570 Orysa4|Os02g14900.1  
AT2G21160Orysa4|Os06g50154.1  
AT2G16595  
AT2G32560,AT2G26850,AT2G41170 Orysa4|Os01g59180.1  
Orysa4|Os01g17390.1  
AT5G52960 Orysa4|Os05g49410.1  
AT3G48470 Orysa4|Os02g38680.1  
Orysa4|Os02g38490.1  
Orysa4|Os02g35630.1  
AT5G53350 Orysa4|Os02g19150.1  
AT1G33360  
Orysa4|Os01g66330.1  
AT5G49840 Orysa4|Os05g45750.1  
AT3G48680,AT5G63510 Orysa4|Os02g30460.1  
AT1G47260 Orysa4|Os12g07220.1  
AT1G19580,AT5G66510 Orysa4|Os01g18070.1  
Orysa4|Os04g24170.1  
AT3G12640 Orysa4|Os04g39629.1  
AT2G47070,AT3G60030 Orysa4|Os03g61760.1  
AT4G26470 Orysa4|Os02g10470.1,Orysa4|Os06g40720.1  
AT3G24110Orysa4|Os05g05460.1  
AT2G29580,AT1G07360,AT5G07060 Orysa4|Os07g18050.1,Orysa4|Os06g07350.1  
AT5G04210  
AT1G18290 Orysa4|Os01g03080.1  
Orysa4|Os10g38292.1  
AT3G49720,AT5G65810 Orysa4|Os01g05070.1  
AT5G43660,AT1G48700,AT1G48740,AT1G47940 Orysa4|Os01g08570.1,Orysa4|Os01g31770.1  
AT3G18210  
AT1G22950  
AT1G78590 Orysa4|Os09g17680.1  
Orysa4|Os08g45190.1  
AT2G05620  
AT2G04690 Orysa4|Os06g13100.1  
Orysa4|Os02g12870.1  
AT1G67060  
AT5G55940,AT5G51620 Orysa4|Os04g20230.1  
AT3G20440  
Orysa4|Os04g33460.1  
Orysa4|Os06g51084.1  
Orysa4|Os06g26234.1  
AT5G03650,AT2G36390 Orysa4|Os02g32660.1  
AT2G27480 Orysa4|Os08g44390.1  
AT5G04170,AT3G10300 Orysa4|Os11g04480.1,Orysa4|Os12g04240.1  
AT3G12300 Orysa4|Os09g33570.1  
AT1G29700 Orysa4|Os12g44370.1  
Orysa4|Os07g40930.1  
AT5G15550  
AT1G20310,AT1G76070 Orysa4|Os09g37080.1  
AT1G71810 Orysa4|Os04g54790.1  
AT1G79600  
AT3G24190 Orysa4|Os02g57160.1  
AT4G31390 Orysa4|Os11g11000.1  
AT2G39190 Orysa4|Os02g56200.1  
AT5G24970 Orysa4|Os07g27480.1  
AT5G16760  
AT4G33770  
Orysa4|Os02g26720.1  
AT4G08170 Orysa4|Os03g12840.1,Orysa4|Os10g01480.1,Orysa4|Os03g51610.1  
Orysa4|Os10g42550.1  
AT1G60320,AT1G09665  
Orysa4|Os07g37950.1  
AT4G23515,AT1G51280,AT5G45000,AT5G45220,AT5G45080,AT5G45070,AT1G65390,AT5G44900,AT5G44910,AT4  
G19925,AT4G19920,AT4G19910,AT5G44920,AT1G57670,AT4G19515,AT4G19470,AT4G23510,AT4G11340,AT5G47  
280,AT1G47370  
AT4G03750,AT4G09360,AT1G72930  
AT5G41740,AT5G41750,AT5G41540,AT5G41550,AT5G40910,AT1G64070,AT2G16870,AT1G63870,AT1G63880,AT1  
G63750,AT5G58120,AT5G38850,AT1G63730,AT1G63740,AT1G56510,AT1G56520,AT1G56540,AT1G66090,AT5G49  
140,AT4G11170,AT5G18350,AT5G18370,AT5G18360,AT5G17970,AT1G69550,AT5G11250,AT2G14080,AT3G04220,  
AT5G38350,AT1G65850,AT5G38340,AT3G44630,AT3G44480,AT3G44400,AT3G44670,AT3G25510,AT5G44510,AT3  
G04210,AT5G46470,AT5G46450,AT5G40060,AT5G22690,AT4G08450,AT5G46490,AT1G31540,AT5G46270,AT5G46  
260,AT5G46520,AT5G46510,AT4G16920,AT4G16950,AT4G16860,AT4G16960,AT4G16940,AT4G16890,AT4G16900,  
AT5G51630,AT4G04110,AT1G57650,AT4G19500,AT4G16990  
AT1G27170,AT1G27180,AT5G46500,AT5G17680,AT4G12020  
AT2G17055

AT2G20145  
AT5G38344,AT4G16930,AT4G16880  
AT5G45260,AT5G45050,AT4G36140,AT5G45210,AT3G51560,AT4G19520,AT5G45240  
AT2G03300,AT2G03030,AT1G57850  
AT1G52900,AT1G61105  
AT1G19960,AT2G32140  
AT5G36930,AT2G17050,AT1G57630  
AT4G09430,AT1G72840,AT1G17600,AT5G40100,AT1G72860,AT5G48770,AT1G72920,AT1G72940,AT1G72950,AT1G72900,AT1G72910,AT1G17615,AT1G72890,AT4G09420,AT1G72850,AT5G48780,AT1G17610,AT5G40090,AT1G72870  
AT1G57830  
AT5G45230,AT2G17060,AT4G36150,AT5G45200,AT5G45060,AT5G45250,AT3G51570,AT4G19530,AT5G17880,AT5G44870,AT4G19510,AT4G12010  
AT3G25900 Orysa4|Os03g12110.1  
AT3G63250,AT3G22740 Orysa4|Os10g28630.1  
Orysa4|Os01g56610.1  
AT3G19040,AT1G32750 Orysa4|Os06g43790.1  
AT4G15520 Orysa4|Os05g04940.1  
AT5G53480 Orysa4|Os12g38110.1  
Orysa4|Os03g18350.1,Orysa4|Os05g28510.1  
AT3G13740,AT1G55140 Orysa4|Os11g13420.1,Orysa4|Os05g25400.1  
AT5G17380 Orysa4|Os01g32080.1  
AT4G09890 Orysa4|Os06g47220.1  
AT3G13910  
AT5G11970,AT2G19460 Orysa4|Os01g38660.1  
AT1G72720  
AT2G47480,AT3G62640,AT3G05725  
Orysa4|Os02g13060.1,Orysa4|Os03g61590.1,Orysa4|Os01g20000.1,Orysa4|Os05g28840.1,Orysa4|Os07g49020.1  
Orysa4|Os10g03540.1  
AT4G22380,AT5G20160,AT4G12600 Orysa4|Os03g13800.1  
Orysa4|Os10g42299.1  
AT1G74240 Orysa4|Os03g11510.1  
AT1G14560 Orysa4|Os01g51250.1,Orysa4|Os01g38990.1  
AT4G01100Orysa4|Os05g50840.1  
AT1G79900 Orysa4|Os01g12520.1  
AT1G25380  
AT5G42130  
AT5G66380 Orysa4|Os03g52430.1  
AT1G07030,AT2G30160  
Orysa4|Os02g44570.1  
AT4G39460 Orysa4|Os07g19460.1  
AT3G55640 Orysa4|Os01g04990.1,Orysa4|Os03g16080.1  
AT3G20240 Orysa4|Os09g32200.1,Orysa4|Os08g40850.1  
AT4G32400  
Orysa4|Os05g07900.1  
AT4G11440  
Orysa4|Os01g32980.1  
AT2G37890,AT3G53940  
AT2G47490 Orysa4|Os05g28870.1  
AT5G48970,AT3G21390 Orysa4|Os01g70800.1  
AT2G33820 Orysa4|Os11g23170.1  
AT5G46800  
AT5G01500,AT3G51870  
Orysa4|Os01g16040.1  
AT1G07025  
Orysa4|Os07g24060.1  
Orysa4|Os06g40050.1  
AT1G34065  
AT1G78180,AT5G64970 Orysa4|Os03g09110.1  
AT4G26180 Orysa4|Os02g13300.1  
AT1G55150 Orysa4|Os01g10050.1  
AT5G08620,AT5G08610,AT5G63630 Orysa4|Os01g43130.1,Orysa4|Os01g43120.1  
AT1G51380  
AT3G09620,AT1G20920  
Orysa4|Os10g35990.1  
AT3G06480  
AT3G58510,AT2G42520,AT3G58570 Orysa4|Os11g38670.1  
AT3G06980 Orysa4|Os03g01830.1  
AT3G09720 Orysa4|Os07g45360.1  
AT3G22310,AT3G22330 Orysa4|Os07g05050.1  
AT1G12770 Orysa4|Os03g12000.1,Orysa4|Os02g42406.1  
Orysa4|Os07g43980.1  
Orysa4|Os07g33340.1  
Orysa4|Os01g07080.1  
Orysa4|Os03g36930.1,Orysa4|Os01g45190.1  
AT4G00660  
Orysa4|Os01g36890.1,Orysa4|Os01g36920.1  
Orysa4|Os02g42860.1,Orysa4|Os04g45040.1  
Orysa4|Os11g46240.1  
AT3G18600  
AT1G71280,AT1G71370,AT5G05450

AT1G72730  
Orysa4|Os01g68320.1  
AT3G16840 Orysa4|Os04g43140.1  
Orysa4|Os04g59400.1  
AT2G47330 Orysa4|Os03g19530.1  
Orysa4|Os06g40020.1  
AT1G59990  
Orysa4|Os03g58810.1,Orysa4|Os06g34420.1  
AT3G13920,AT1G54270  
AT3G02065 Orysa4|Os02g10770.1  
AT5G11200,AT5G11170  
AT5G51280,AT4G33370  
AT5G60990  
Orysa4|Os03g50090.1  
AT3G53110Orysa4|Os03g06220.1  
AT5G54910  
AT4G09730 Orysa4|Os01g08930.1  
Orysa4|Os03g59050.1  
AT2G07750,AT1G63250 Orysa4|Os02g57980.1  
AT4G34910 Orysa4|Os03g51900.1  
AT5G63120  
AT1G77050 Orysa4|Os08g32090.1  
Orysa4|Os09g21520.1  
AT5G62190 Orysa4|Os09g34910.1  
AT2G33730  
AT4G16630 Orysa4|Os12g29660.1  
Orysa4|Os03g46610.1,Orysa4|Os07g46580.1  
AT1G31970 Orysa4|Os07g20580.1  
AT2G40700 Orysa4|Os05g01990.1  
AT5G19210 Orysa4|Os01g73900.1  
Orysa4|Os02g05330.1,Orysa4|Os06g48750.1  
AT3G61240,AT2G45810  
AT4G15850 Orysa4|Os02g55260.1  
AT3G19760  
AT5G14610,AT3G01540  
AT5G26742  
Orysa4|Os02g05660.1,Orysa4|Os06g48210.1  
AT1G16280  
Orysa4|Os06g33520.1  
AT5G65900  
Orysa4|Os01g36860.1  
AT5G60540 Orysa4|Os02g03740.1  
AT2G42120 Orysa4|Os03g03650.1  
AT3G61870 Orysa4|Os02g03010.1  
AT1G74880 Orysa4|Os01g72950.1  
Orysa4|Os02g15860.1,Orysa4|Os06g33200.1  
AT5G55620,AT3G09950,AT5G06010,AT3G11405  
AT3G55570 Orysa4|Os01g12190.1  
AT2G14635 Orysa4|Os10g41360.1  
AT3G60350,AT2G44900  
AT5G51540 Orysa4|Os06g47210.1  
AT5G24850 Orysa4|Os06g45100.1  
AT4G10760 Orysa4|Os02g45110.1  
Orysa4|Os07g28480.1,Orysa4|Os09g20220.1  
Orysa4|Os06g12290.1  
AT5G62480,AT1G74590  
Orysa4|Os03g39850.1,Orysa4|Os01g72140.1,Orysa4|Os01g72150.1,Orysa4|Os01g72120.1,Orysa4|Os01g72170.1,Orysa4|Os01g72160.1  
Orysa4|Os07g05800.1  
AT3G09270,AT2G29480,AT2G29490,AT2G29460,AT2G29470,AT2G29440,AT2G29450,AT2G29420  
AT1G10370,AT1G10360,AT1G59670,AT1G59700,AT1G27140,AT1G27130,AT1G69920,AT1G69930  
Orysa4|Os10g38350.1,Orysa4|Os10g38340.1,Orysa4|Os10g38600.1,Orysa4|Os10g38610.1,Orysa4|Os10g38590.1,Orysa4|Os10g38630.1,Orysa4|Os10g38640.1,Orysa4|Os10g38489.1,Orysa4|Os10g38540.1,Orysa4|Os10g38580.1,Orysa4|Os10g38360.1,Orysa4|Os10g38670.1,Orysa4|Os10g38660.1,Orysa4|Os10g22070.1,Orysa4|Os10g22310.1,Orysa4|Os01g37750.1,Orysa4|Os07g07320.1,Orysa4|Os10g38690.1,Orysa4|Os10g38730.1,Orysa4|Os10g38780.1,Orysa4|Os01g49720.1,Orysa4|Os01g49710.1,Orysa4|Os10g38720.1,Orysa4|Os10g38700.1,Orysa4|Os10g38710.1,Orysa4|Os10g25590.1  
Orysa4|Os10g38150.1  
Orysa4|Os11g03210.1,Orysa4|Os12g02960.1,Orysa4|Os09g29200.1,Orysa4|Os05g34150.1  
AT1G78380,AT1G78360,AT1G17170,AT1G17180,AT1G78370,AT1G78340,AT1G78320,AT1G17190,AT3G43800,AT1G53680  
Orysa4|Os10g38189.1,Orysa4|Os10g38140.1,Orysa4|Os10g38314.1,Orysa4|Os10g34020.1  
AT1G59610,AT1G10290 Orysa4|Os08g32920.1  
Orysa4|Os06g13820.1,Orysa4|Os02g50550.1,Orysa4|Os10g10580.1,Orysa4|Os03g52230.1,Orysa4|Os10g40770.1  
AT4G34340  
AT5G15570,AT3G02160 Orysa4|Os02g47160.1  
Orysa4|Os03g40650.1  
AT2G39440 Orysa4|Os02g07240.1  
Orysa4|Os05g34840.1  
AT2G02000,AT2G02010  
Orysa4|Os04g37500.1



AT1G65960,AT5G17330 Orysa4|Os03g13300.1,Orysa4|Os03g51080.1  
AT3G17720 Orysa4|Os08g36320.1  
AT3G17760 Orysa4|Os04g37460.1  
AT4G22320,AT5G55210 Orysa4|Os09g11240.1,Orysa4|Os08g25080.1  
AT3G27520 Orysa4|Os02g38180.1  
AT2G36930 Orysa4|Os08g45040.1  
AT1G27320 Orysa4|Os01g69920.1  
Orysa4|Os10g21810.1  
AT2G17820  
AT2G01830 Orysa4|Os02g50480.1,Orysa4|Os03g50860.1  
AT5G35750  
Orysa4|Os05g11930.1  
Orysa4|Os06g08450.1  
Orysa4|Os07g38910.1  
AT4G00450 Orysa4|Os10g40260.1,Orysa4|Os07g45400.1  
AT5G53220 Orysa4|Os01g12180.1  
Orysa4|Os01g46840.1  
Orysa4|Os09g32800.1,Orysa4|Os08g41730.1  
AT3G60820  
AT2G31840 Orysa4|Os05g34470.1  
AT4G28590 Orysa4|Os01g61320.1  
AT5G51960 Orysa4|Os11g03920.1  
AT2G40840 Orysa4|Os07g46790.1  
AT5G60210,AT3G53350,AT2G37080 Orysa4|Os05g03120.1  
AT3G01560,AT5G14540 Orysa4|Os01g07520.1,Orysa4|Os05g07730.1  
AT4G27510 Orysa4|Os02g26300.1  
AT1G66860,AT5G38200,AT1G15040 Orysa4|Os01g04620.1  
AT3G18890  
Orysa4|Os10g01044.1  
Orysa4|Os01g51370.1  
AT5G63960 Orysa4|Os11g08330.1  
AT4G39880 Orysa4|Os07g23244.1  
AT2G33255 Orysa4|Os02g57100.1  
AT5G01700 Orysa4|Os11g01790.1  
AT4G03415,AT1G03590  
AT3G02750,AT5G36250  
Orysa4|Os04g25570.1,Orysa4|Os02g27220.1,Orysa4|Os11g22404.1  
AT5G26010,AT4G32950 Orysa4|Os02g13100.1  
AT3G05640,AT5G27930,AT3G16800 Orysa4|Os05g29030.1  
AT1G16220,AT1G79630 Orysa4|Os08g39100.1  
AT3G60090,AT2G44340,AT3G58000,AT2G42140 Orysa4|Os06g41450.1,Orysa4|Os04g57030.1  
AT4G15930 Orysa4|Os06g29690.1,Orysa4|Os01g15260.1  
AT2G18500 Orysa4|Os11g05780.1,Orysa4|Os12g06160.1,Orysa4|Os04g37510.1,Orysa4|Os03g10150.1  
Orysa4|Os10g38880.1  
Orysa4|Os07g36100.1  
AT2G32840,AT1G04930 Orysa4|Os03g13190.1  
Orysa4|Os07g30800.1  
AT3G60370  
AT4G16380,AT1G51090,AT1G49420 Orysa4|Os11g41120.1  
AT1G64350 Orysa4|Os01g43250.1  
AT4G32640,AT3G44340 Orysa4|Os11g29200.1,Orysa4|Os12g24250.1  
AT3G07100 Orysa4|Os04g04020.1  
AT5G18480 Orysa4|Os02g41520.1  
AT5G27230  
AT4G00650 Orysa4|Os03g63440.1  
Orysa4|Os03g39160.1  
AT1G31814,AT5G16320  
Orysa4|Os03g09310.1  
Orysa4|Os03g39180.1,Orysa4|Os01g08580.1  
Orysa4|Os07g40270.1  
AT5G48385 Orysa4|Os09g07360.1,Orysa4|Os09g07380.1  
AT2G09990,AT5G18380,AT3G04230 Orysa4|Os11g03400.1,Orysa4|Os12g03090.1  
AT5G44320,AT4G20980 Orysa4|Os05g49150.1  
AT1G04470,AT2G33420 Orysa4|Os10g33240.1  
Orysa4|Os04g48040.1,Orysa4|Os10g16430.1  
AT5G06970 Orysa4|Os03g47930.1  
AT2G25800,AT2G20010 Orysa4|Os08g30070.1,Orysa4|Os09g17760.1  
Orysa4|Os02g55290.1  
AT4G11670  
AT1G32460 Orysa4|Os02g46480.1  
AT3G22840,AT4G14690  
Orysa4|Os03g30400.1,Orysa4|Os02g16560.1,Orysa4|Os07g08160.1,Orysa4|Os07g08150.1,Orysa4|Os01g14410.1  
AT1G76450 Orysa4|Os08g40160.1  
AT1G69510  
AT4G16146 Orysa4|Os12g24580.1,Orysa4|Os03g19220.1  
Orysa4|Os01g14690.1  
Orysa4|Os01g19940.1  
AT5G64130 Orysa4|Os01g47490.1,Orysa4|Os05g49160.1  
AT1G50830,AT5G18510,AT4G16050 Orysa4|Os03g36830.1,Orysa4|Os03g36760.1,Orysa4|Os10g11820.1  
AT5G13610  
AT1G69380 Orysa4|Os01g55860.1

Orysa4|Os07g49410.1  
AT4G09620 Orysa4|Os03g62240.1  
AT5G41760 Orysa4|Os06g33210.1  
AT4G35335 Orysa4|Os07g38610.1  
AT4G38350,AT1G42470 Orysa4|Os04g47590.1  
AT1G69450,AT3G01100 Orysa4|Os12g39320.1  
AT4G02900 Orysa4|Os05g32720.1  
AT1G30360 Orysa4|Os07g05570.1  
AT1G32090 Orysa4|Os10g42820.1  
Orysa4|Os03g51620.1  
AT1G58520,AT1G10090 Orysa4|Os03g47070.1,Orysa4|Os12g43720.1  
AT3G54510 Orysa4|Os01g72210.1  
AT1G62320,AT1G11960,AT4G04340,AT4G22120,AT4G15430,AT3G21620  
Orysa4|Os05g51630.1,Orysa4|Os01g35050.1  
AT3G27390,AT5G40640 Orysa4|Os02g38430.1,Orysa4|Os04g40700.1  
AT4G37030  
AT4G12680 Orysa4|Os06g19630.1  
AT5G60410 Orysa4|Os05g03430.1  
Orysa4|Os07g25890.1,Orysa4|Os03g50980.1  
AT5G11330 Orysa4|Os06g39660.1  
AT2G45670 Orysa4|Os06g49790.1  
AT1G27530 Orysa4|Os10g13800.1  
AT5G02440 Orysa4|Os01g62360.1  
AT1G51340 Orysa4|Os10g13940.1  
AT2G38330 Orysa4|Os12g01580.1  
Orysa4|Os05g33910.1,Orysa4|Os12g06050.1,Orysa4|Os12g25160.1,Orysa4|Os01g69010.1,Orysa4|Os03  
g11734.1  
AT4G38380 Orysa4|Os02g58620.1,Orysa4|Os09g37610.1  
AT3G08040  
Orysa4|Os04g10230.1  
AT3G52110 Orysa4|Os03g07810.1  
AT3G54750 Orysa4|Os12g42700.1  
Orysa4|Os06g34970.1,Orysa4|Os11g44870.1,Orysa4|Os11g44460.1,Orysa4|Os11g44520.1,Orysa4|Os12  
g31540.1,Orysa4|Os11g44320.1,Orysa4|Os11g44510.1,Orysa4|Os12g14670.1,Orysa4|Os11g44800.1,Orysa4|Os03g2  
4810.1,Orysa4|Os12g17680.1,Orysa4|Os06g47780.1  
AT2G17780,AT4G35920 Orysa4|Os03g06120.1  
Orysa4|Os12g09280.1  
AT2G29540 Orysa4|Os11g11130.1,Orysa4|Os11g11110.1  
AT3G21260  
AT1G21360 Orysa4|Os04g35790.1  
AT2G33470  
Orysa4|Os07g26460.1  
Orysa4|Os02g40890.1  
AT5G06770,AT3G12130 Orysa4|Os04g57010.1,Orysa4|Os02g10080.1  
AT1G68185 Orysa4|Os01g42250.1  
AT5G66540 Orysa4|Os11g04200.1,Orysa4|Os12g04010.1  
AT1G75150  
AT2G32850 Orysa4|Os02g37880.1,Orysa4|Os09g10720.1  
AT1G31940,AT2G35585 Orysa4|Os02g47000.1  
AT1G32400 Orysa4|Os08g18044.1  
Orysa4|Os08g06250.1  
AT4G28770,AT2G20230 Orysa4|Os06g51480.1  
AT2G20740 Orysa4|Os04g58330.1  
AT1G02030,AT3G60580,AT2G45120  
AT5G61470 Orysa4|Os06g20020.1  
AT4G16610 Orysa4|Os04g46680.1,Orysa4|Os02g44130.1,Orysa4|Os10g40660.1  
Orysa4|Os03g31240.1  
AT4G17550 Orysa4|Os02g43620.1  
AT1G30560,AT4G25220  
AT2G13100 Orysa4|Os06g08170.1  
AT3G47420 Orysa4|Os08g06010.1,Orysa4|Os04g46880.1  
AT3G03880,AT1G55340 Orysa4|Os03g59250.1  
AT5G39590 Orysa4|Os04g56790.1  
AT4G27090,AT2G20450 Orysa4|Os02g40880.1,Orysa4|Os04g43540.1  
Orysa4|Os01g37120.1  
AT2G46560  
AT4G12070 Orysa4|Os09g31360.1,Orysa4|Os02g48640.1,Orysa4|Os08g24434.1,Orysa4|Os09g10950.1  
AT2G06925 Orysa4|Os03g50030.1,Orysa4|Os11g34440.1  
Orysa4|Os03g58050.1,Orysa4|Os07g07709.1  
AT4G09800,AT1G22780,AT1G34030  
Orysa4|Os07g07770.1  
AT4G30720 Orysa4|Os05g34040.1  
AT2G24410  
Orysa4|Os05g46860.1,Orysa4|Os05g46780.1  
AT3G20550  
AT3G52240 Orysa4|Os05g37340.1,Orysa4|Os05g37400.1  
AT5G54260 Orysa4|Os04g54340.1  
AT3G56160 Orysa4|Os02g32930.1  
AT1G01840 Orysa4|Os04g44100.1  
AT4G24270 Orysa4|Os08g02130.1  
AT3G08505 Orysa4|Os06g21390.1  
AT4G10140,AT1G33490 Orysa4|Os05g01510.1

AT5G06650,AT3G58070 Orysa4|Os06g10470.1,Orysa4|Os03g11680.1,Orysa4|Os09g27320.1  
Orysa4|Os01g12210.1  
AT2G17470,AT1G68600,AT1G25480,AT3G18440,AT1G18420 Orysa4|Os06g15779.1,Orysa4|Os02g49790.1  
AT1G03630,AT5G54190,AT4G27440 Orysa4|Os10g35370.1,Orysa4|Os04g58200.1  
Orysa4|Os01g73140.1  
AT1G77710  
Orysa4|Os01g33784.1  
AT1G18460,AT1G73920  
AT3G55830 Orysa4|Os06g49150.1  
AT5G17780,AT5G17720 Orysa4|Os07g48610.1  
AT4G24140,AT1G64670,AT5G41900 Orysa4|Os10g38860.1,Orysa4|Os06g04169.1  
AT5G12930 Orysa4|Os09g31350.1  
AT1G51550  
AT5G23410,AT1G68050 Orysa4|Os11g34460.1  
AT5G57360,AT2G18915 Orysa4|Os06g47890.1,Orysa4|Os02g05700.1  
AT1G16190,AT1G79650 Orysa4|Os02g08300.1  
AT5G16090  
Orysa4|Os08g21630.1  
Orysa4|Os09g24200.1,Orysa4|Os08g33340.1  
AT3G02540,AT5G38470 Orysa4|Os06g15360.1  
AT5G61780,AT5G07350 Orysa4|Os04g32960.1,Orysa4|Os02g32350.1  
Orysa4|Os03g08530.1,Orysa4|Os10g25130.1  
AT1G70580,AT1G23310 Orysa4|Os07g01760.1  
Orysa4|Os10g25140.1  
Orysa4|Os09g26380.1  
AT1G17290,AT1G72330 Orysa4|Os07g42600.1  
AT5G28550  
AT4G22970 Orysa4|Os10g07420.1,Orysa4|Os03g47169.1,Orysa4|Os02g53120.1  
AT4G24300  
Orysa4|Os12g17880.1  
Orysa4|Os07g32940.1  
Orysa4|Os01g72000.1  
AT1G76390,AT1G20780 Orysa4|Os12g17900.1  
Orysa4|Os03g45420.1  
AT1G68940 Orysa4|Os02g49520.1,Orysa4|Os06g16410.1  
AT1G21710 Orysa4|Os02g34750.1  
AT1G55325 Orysa4|Os05g37500.1  
AT3G12590  
Orysa4|Os01g74310.1  
AT5G57450 Orysa4|Os02g35450.1  
AT2G28560 Orysa4|Os12g07900.1  
AT5G20850 Orysa4|Os12g31370.1,Orysa4|Os11g40150.1  
AT3G22880 Orysa4|Os12g04980.1  
Orysa4|Os09g39870.1  
AT3G45090,AT5G60760 Orysa4|Os02g57400.1  
Orysa4|Os04g19740.1  
AT2G45290,AT3G60750 Orysa4|Os06g04270.1  
AT1G24310 Orysa4|Os07g19494.1  
AT1G16720 Orysa4|Os06g49120.1  
AT1G70820 Orysa4|Os06g28194.1  
AT5G17530 Orysa4|Os07g26610.1  
AT4G39300 Orysa4|Os02g17370.1,Orysa4|Os01g37090.1  
Orysa4|Os03g61260.1  
AT1G48350  
AT1G14205 Orysa4|Os03g07340.1  
AT1G17440 Orysa4|Os01g62820.1  
AT3G10070 Orysa4|Os01g63940.1  
AT3G46740,AT1G35860,AT4G09080 Orysa4|Os03g16440.1,Orysa4|Os11g02460.1  
AT1G35880  
AT2G05990  
Orysa4|Os09g10600.1,Orysa4|Os08g23810.1  
AT2G32060,AT1G15930 Orysa4|Os07g05580.1,Orysa4|Os07g12650.1  
AT3G20630 Orysa4|Os01g08200.1  
AT2G19240,AT4G29950,AT5G57210 Orysa4|Os06g45080.1,Orysa4|Os08g40620.1  
AT3G12530 Orysa4|Os01g14610.1  
AT2G20585 Orysa4|Os01g55020.1,Orysa4|Os01g13720.1  
AT1G28395 Orysa4|Os01g53620.1  
AT3G03630 Orysa4|Os01g59920.1  
AT5G28030,AT5G28020,AT3G04940  
Orysa4|Os01g74650.1  
AT1G55880 Orysa4|Os03g11660.1  
Orysa4|Os06g36840.1,Orysa4|Os06g36880.1,Orysa4|Os06g36830.1,Orysa4|Os06g05690.1,Orysa4|Os02g12900.1  
AT3G61440 Orysa4|Os04g08350.1  
AT3G22460,AT4G14880 Orysa4|Os12g42980.1  
Orysa4|Os06g36820.1  
AT2G43750,AT3G59760  
AT5G48545  
Orysa4|Os11g18990.1  
Orysa4|Os12g13120.1  
AT5G42740 Orysa4|Os03g56460.1  
Orysa4|Os11g25920.1

AT5G53900  
AT3G15240,AT3G15230 Orysa4|Os07g03980.1  
AT2G31650,AT1G05830 Orysa4|Os09g04890.1  
AT1G76850,AT1G21170 Orysa4|Os04g34450.1  
Orysa4|Os06g05530.1  
AT1G21312,AT1G76940  
Orysa4|Os09g35850.1,Orysa4|Os08g43360.1  
Orysa4|Os06g03690.1  
AT5G45920 Orysa4|Os09g03490.1,Orysa4|Os01g11570.1,Orysa4|Os06g06230.1  
AT2G38180  
AT5G62930 Orysa4|Os10g33690.1  
AT3G11210,Orysa4|Os11g48070.1  
AT5G50920  
Orysa4|Os02g19450.1,Orysa4|Os02g33420.1  
AT5G51070 Orysa4|Os04g33210.1,Orysa4|Os02g32520.1  
AT2G25140  
Orysa4|Os11g16670.1  
Orysa4|Os02g08490.1  
AT3G48870  
Orysa4|Os11g16590.1  
AT4G14670  
AT3G45450  
AT1G74310 Orysa4|Os05g44340.1  
Orysa4|Os04g32560.1,Orysa4|Os12g12850.1  
AT5G15450 Orysa4|Os03g31300.1  
Orysa4|Os08g20190.1  
Orysa4|Os08g42010.1  
AT1G80530 Orysa4|Os06g08110.1,Orysa4|Os04g42420.1,Orysa4|Os08g15450.1  
AT2G28120,AT2G39210  
Orysa4|Os07g09010.1,Orysa4|Os03g58580.1,Orysa4|Os12g29950.1,Orysa4|Os03g47810.1,Orysa4|Os10  
g08850.1,Orysa4|Os12g44060.1,Orysa4|Os12g44070.1  
AT4G34950,AT2G16660 Orysa4|Os09g36600.1  
AT5G50520,AT5G50630  
AT5G45275,AT4G19450,AT3G01630,AT1G31470 Orysa4|Os12g01570.1,Orysa4|Os11g01590.1  
Orysa4|Os04g31924.1  
AT1G18940,AT1G74780,AT2G34355,AT2G34350  
AT5G14120,AT3G01930  
AT2G30300 Orysa4|Os01g61010.1,Orysa4|Os05g39800.1  
AT1G80860 Orysa4|Os02g39880.1  
AT4G16030  
Orysa4|Os03g21940.1,Orysa4|Os03g38260.1  
AT1G02780,AT4G02230,AT3G16780  
Orysa4|Os07g47430.1  
AT3G28700 Orysa4|Os01g40620.1  
AT4G02160,AT5G61710 Orysa4|Os01g23880.1  
AT3G24590 Orysa4|Os02g16709.1  
AT1G06870,AT2G30440 Orysa4|Os03g55640.1,Orysa4|Os09g28000.1  
AT1G13680 Orysa4|Os03g30130.1  
Orysa4|Os04g59310.1,Orysa4|Os08g01310.1  
AT5G67130 Orysa4|Os09g02729.1  
AT3G19310,AT1G49740 Orysa4|Os04g35100.1  
Orysa4|Os03g40720.1  
Orysa4|Os04g49250.1  
AT1G26570,AT5G15490,AT3G01010,AT5G39320,AT3G29360  
Orysa4|Os03g55070.1,Orysa4|Os12g25690.1,Orysa4|Os12g25700.1  
Orysa4|Os05g36000.1  
AT2G22230  
AT5G10160  
AT4G36080,AT2G17930 Orysa4|Os07g45070.1  
AT2G47720,AT3G62770 Orysa4|Os01g70780.1  
AT5G05150  
AT4G30510 Orysa4|Os02g54910.1  
AT2G40810,AT3G56440 Orysa4|Os05g07710.1  
Orysa4|Os07g47410.1  
AT5G58100 Orysa4|Os03g37320.1,Orysa4|Os02g26984.1  
AT5G57590  
Orysa4|Os08g14770.1  
AT5G57600  
Orysa4|Os03g53230.1  
AT1G19920 Orysa4|Os04g02050.1  
AT4G14680,AT3G22890,AT5G43780  
AT4G32910 Orysa4|Os01g54240.1  
AT3G63150,AT3G05310,AT5G27540 Orysa4|Os03g59600.1,Orysa4|Os03g59590.1  
Orysa4|Os12g32380.1,Orysa4|Os11g41610.1  
Orysa4|Os03g56234.1  
AT4G39380  
Orysa4|Os01g08680.1,Orysa4|Os07g44030.1  
AT2G36960 Orysa4|Os03g13790.1  
AT4G33865,AT3G44010,AT3G43980  
Orysa4|Os03g22160.1  
AT4G02260  
AT1G75560 Orysa4|Os03g60600.1

Orysa4|Os10g39820.1  
AT4G25910 Orysa4|Os06g47940.1  
AT5G49940 Orysa4|Os12g07700.1,Orysa4|Os11g07916.1  
AT1G07210 Orysa4|Os10g35690.1  
Orysa4|Os05g22880.1,Orysa4|Os02g35680.1,Orysa4|Os05g05250.1  
g22590.1,Orysa4|Os06g03360.1,Orysa4|Os08g19740.1,Orysa4|Os02g18980.1,Orysa4|Os12g24700.1,Orysa4|Os11  
g22590.1,Orysa4|Os06g31400.1,Orysa4|Os06g15710.1  
Orysa4|Os08g42500.1  
Orysa4|Os01g38740.1  
Orysa4|Os01g24260.1,Orysa4|Os07g18780.1,Orysa4|Os05g11290.1,Orysa4|Os02g35670.1,Orysa4|Os06  
g19160.1  
Orysa4|Os12g31920.1,Orysa4|Os02g18120.1,Orysa4|Os11g28590.1,Orysa4|Os08g04970.1,Orysa4|Os11  
g28370.1,Orysa4|Os11g29330.1,Orysa4|Os06g23240.1,Orysa4|Os08g30360.1,Orysa4|Os03g48550.1,Orysa4|Os10g  
01440.1  
AT1G03620 Orysa4|Os04g01150.1  
AT3G43400,AT1G67400 Orysa4|Os11g29350.1  
AT3G03610  
Orysa4|Os11g03530.1,Orysa4|Os12g03270.1  
AT2G44770,AT3G60260 Orysa4|Os04g46079.1,Orysa4|Os02g43590.1  
AT5G66840 Orysa4|Os07g42760.1  
Orysa4|Os10g25220.1  
AT5G44710  
Orysa4|Os05g05560.1  
Orysa4|Os01g72940.1  
AT4G25970,AT5G57190  
AT1G65540,AT3G59820 Orysa4|Os04g41950.1  
AT2G36900,AT5G50440 Orysa4|Os03g45260.1  
AT4G25720 Orysa4|Os06g01410.1  
AT2G33250,AT3G04310 Orysa4|Os01g48820.1  
AT5G22390 Orysa4|Os11g05550.1,Orysa4|Os12g05890.1,Orysa4|Os04g33710.1,Orysa4|Os02g33090.1  
AT1G48860,AT2G45300 Orysa4|Os06g04280.1  
AT2G44640  
AT3G06960 Orysa4|Os01g14820.1  
AT2G40113,AT5G47635,AT4G17215 Orysa4|Os10g13914.1,Orysa4|Os10g14194.1  
AT4G29110,AT1G52140,AT3G16330 Orysa4|Os01g70500.1  
AT1G29150 Orysa4|Os03g37950.1,Orysa4|Os04g36700.1  
AT2G04305  
Orysa4|Os08g03600.1  
AT3G50830,AT4G37220  
AT2G23680  
Orysa4|Os03g55850.1  
AT2G15970  
AT3G54500 Orysa4|Os03g27019.1,Orysa4|Os01g31360.1,Orysa4|Os02g51760.1  
AT1G55980,AT1G56000 Orysa4|Os03g57070.1  
AT5G10240,AT5G65010 Orysa4|Os06g15420.1  
Orysa4|Os03g18130.1  
AT3G47340  
AT4G36410  
AT1G75440  
AT5G42990,AT1G45050 Orysa4|Os03g47770.1,Orysa4|Os12g44000.1  
Orysa4|Os03g44620.1  
AT3G57340,AT5G05750  
Orysa4|Os02g43930.1  
Orysa4|Os03g57340.1  
AT3G08970  
Orysa4|Os12g42440.1  
AT5G22060,AT3G44110  
AT3G62600 Orysa4|Os05g06440.1  
AT1G63110,AT1G12730 Orysa4|Os01g64990.1,Orysa4|Os02g46350.1  
AT2G05120 Orysa4|Os03g12450.1  
AT1G70630 Orysa4|Os05g43810.1  
AT4G24230 Orysa4|Os03g14000.1  
AT4G11110,AT2G46340  
AT3G15354,AT1G53090 Orysa4|Os01g52640.1  
AT2G32950 Orysa4|Os02g53140.1  
Orysa4|Os05g49590.1  
AT5G23730,AT5G52250 Orysa4|Os02g02380.1  
AT1G15420 Orysa4|Os12g43830.1  
AT4G20060 Orysa4|Os01g09310.1  
AT5G22030 Orysa4|Os12g42600.1  
AT4G10570,AT4G10590,AT1G32850 Orysa4|Os10g07270.1  
Orysa4|Os11g28360.1,Orysa4|Os01g48600.1,Orysa4|Os11g44540.1,Orysa4|Os07g06610.1  
AT2G40930  
AT4G37810 Orysa4|Os07g04020.1  
Orysa4|Os03g46930.1  
Orysa4|Os08g37890.1  
AT5G10310 Orysa4|Os02g51950.1  
Orysa4|Os11g44810.1  
AT2G33830,AT1G28330  
AT5G44300  
AT5G07340,AT5G61790  
Orysa4|Os04g32950.1

Orysa4|Os10g30120.1  
AT2G46570  
AT5G01040,AT5G01050,AT3G09220  
AT5G07130,AT2G30210  
Orysa4|Os06g37150.1  
Orysa4|Os06g37080.1  
AT2G40370,AT5G05390 Orysa4|Os11g01730.1,Orysa4|Os12g01730.1,Orysa4|Os01g61160.1  
Orysa4|Os10g30140.1,Orysa4|Os02g51440.1,Orysa4|Os11g47390.1  
Orysa4|Os05g38390.1,Orysa4|Os01g62600.1  
AT5G60020,AT2G29130  
Orysa4|Os05g38410.1,Orysa4|Os05g38420.1,Orysa4|Os01g62490.1,Orysa4|Os01g62480.1,Orysa4|Os03  
g16610.1  
Orysa4|Os03g18640.1  
Orysa4|Os12g15530.1,Orysa4|Os12g15920.1,Orysa4|Os12g15680.1,Orysa4|Os07g01110.1,Orysa4|Os01  
g63200.1,Orysa4|Os01g63190.1  
AT5G48100,AT5G09360  
AT4G39830  
AT2G38080,AT5G01190,AT5G58910 Orysa4|Os11g48060.1  
AT5G21105,AT5G21100  
AT5G03260 Orysa4|Os01g44330.1  
AT1G18140  
Orysa4|Os11g42220.1,Orysa4|Os11g42200.1,Orysa4|Os11g16260.1,Orysa4|Os10g20610.1  
AT3G26750 Orysa4|Os02g03820.1  
AT5G37055 Orysa4|Os03g25260.1  
Orysa4|Os10g41930.1  
Orysa4|Os06g01990.1  
AT2G38740 Orysa4|Os09g24230.1  
AT1G24020,AT1G70830,AT1G70850,AT1G70840,AT1G70890,AT1G70880,AT5G28000,AT5G28010,AT1G35310,AT1  
G35260,AT1G23130,AT1G70870 Orysa4|Os04g39150.1  
AT1G24610 Orysa4|Os02g50100.1  
AT4G36610,AT2G18360 Orysa4|Os02g47780.1,Orysa4|Os01g44960.1  
AT4G19830 Orysa4|Os02g07220.1  
AT4G34160,AT3G50070,AT5G67260  
AT4G37630 Orysa4|Os03g42070.1,Orysa4|Os12g39830.1,Orysa4|Os03g10650.1  
AT1G70210 Orysa4|Os09g21450.1,Orysa4|Os08g32540.1,Orysa4|Os06g12980.1  
AT4G03270 Orysa4|Os07g37010.1  
AT5G02110Orysa4|Os11g47950.1  
Orysa4|Os06g11410.1,Orysa4|Os07g42860.1  
Orysa4|Os03g27420.1  
AT5G10440,AT5G65420,AT2G22490  
Orysa4|Os08g37390.1,Orysa4|Os09g29100.1  
AT5G37810,AT5G37820  
Orysa4|Os06g12310.1,Orysa4|Os02g51110.1  
AT3G06100  
AT4G18910,AT4G19030 Orysa4|Os02g13870.1  
Orysa4|Os01g10530.1,Orysa4|Os05g11560.1  
Orysa4|Os06g35930.1  
AT2G29870,AT2G34390,AT1G31885  
Orysa4|Os01g02190.1  
AT1G80760  
Orysa4|Os08g05590.1,Orysa4|Os08g05600.1,Orysa4|Os12g10280.1,Orysa4|Os08g05580.1  
AT4G10380 Orysa4|Os10g36924.1  
AT4G04870 Orysa4|Os01g57930.1  
AT1G53850,AT3G14290 Orysa4|Os11g40140.1  
AT5G19720,AT1G25350 Orysa4|Os05g08990.1,Orysa4|Os01g09000.1  
AT5G49030 Orysa4|Os02g53770.1  
AT2G36810 Orysa4|Os03g05330.1  
AT5G62030 Orysa4|Os02g57050.1  
AT1G64340,AT5G41810 Orysa4|Os02g15800.1,Orysa4|Os06g33390.1  
AT3G54230  
Orysa4|Os02g07070.1  
AT2G33385 Orysa4|Os04g43290.1  
AT1G30825 Orysa4|Os01g46580.1  
AT5G07120,AT5G58440 Orysa4|Os01g61150.1,Orysa4|Os05g27920.1  
AT5G37050  
Orysa4|Os07g04210.1  
AT4G23000,AT4G11800 Orysa4|Os07g01540.1  
Orysa4|Os07g04760.1  
AT2G19880 Orysa4|Os01g67870.1  
AT2G32480,AT1G05140 Orysa4|Os02g17220.1,Orysa4|Os07g48440.1,Orysa4|Os03g38230.1  
AT3G55390 Orysa4|Os12g38100.1  
AT4G16060 Orysa4|Os05g29020.1  
Orysa4|Os09g32976.1,Orysa4|Os08g23710.1,Orysa4|Os01g70010.1  
AT3G62870,AT2G47610  
AT4G26555 Orysa4|Os02g10590.1  
AT2G24090  
Orysa4|Os06g43900.1  
AT1G03475,AT4G03205  
Orysa4|Os04g52130.1  
AT5G08740 Orysa4|Os06g11140.1  
AT4G29460,AT4G29470,AT2G19690 Orysa4|Os02g58500.1  
AT1G66330 Orysa4|Os05g05600.1

AT5G53920  
AT1G03770 Orysa4|Os11g36970.1  
Orysa4|Os01g58400.1,Orysa4|Os05g41800.1  
AT3G20865,AT3G57690,AT2G41905 Orysa4|Os06g21410.1  
AT1G19880 Orysa4|Os04g56720.1  
AT3G09180 Orysa4|Os01g15850.1  
Orysa4|Os05g08950.1  
AT1G71750  
AT5G35690 Orysa4|Os08g39150.1  
AT3G28710,AT3G28715  
Orysa4|Os01g40470.1  
AT2G38210  
AT3G16050 Orysa4|Os05g18780.1,Orysa4|Os01g39280.1,Orysa4|Os10g08960.1,Orysa4|Os10g11520.1  
AT5G01410,AT2G38230  
Orysa4|Os11g48080.1  
AT2G41830,AT5G21080 Orysa4|Os07g10550.1,Orysa4|Os02g05040.1,Orysa4|Os02g53990.1  
AT1G05960 Orysa4|Os01g67290.1  
AT5G26850 Orysa4|Os03g19520.1  
AT1G26880,AT1G69620,AT3G28900  
Orysa4|Os08g06040.1,Orysa4|Os08g33920.1,Orysa4|Os09g24690.1  
AT4G37925 Orysa4|Os04g45600.1  
Orysa4|Os06g17280.1  
AT3G05670 Orysa4|Os03g19020.1,Orysa4|Os07g49030.1  
AT3G51580 Orysa4|Os05g40040.1  
Orysa4|Os04g41970.1  
Orysa4|Os01g64140.1  
AT4G38990,AT4G39000  
Orysa4|Os12g24040.1  
AT1G23210,AT1G70710 Orysa4|Os06g14540.1,Orysa4|Os02g50040.1  
Orysa4|Os06g50140.1  
AT2G44540,AT2G44550,AT2G44560,AT2G44570 Orysa4|Os05g03840.1  
AT1G48930 Orysa4|Os04g57860.1  
Orysa4|Os08g02220.1,Orysa4|Os02g03120.1  
AT2G32990 Orysa4|Os02g05744.1  
AT5G49720 Orysa4|Os03g52630.1,Orysa4|Os03g21210.1  
AT3G43860 Orysa4|Os02g53820.1  
Orysa4|Os06g13830.1,Orysa4|Os02g50490.1,Orysa4|Os08g32940.1  
AT1G64390,AT4G11050 Orysa4|Os05g12150.1,Orysa4|Os01g12070.1  
AT4G39010 Orysa4|Os09g36060.1  
AT1G71380,AT1G22880  
AT3G42155  
AT1G75680,AT1G19940 Orysa4|Os09g36350.1  
AT4G02290,AT1G02800 Orysa4|Os01g21070.1  
AT4G23560,AT4G09740 Orysa4|Os08g29770.1  
AT1G65610  
AT4G24260  
AT3G09310 Orysa4|Os11g47930.1,Orysa4|Os02g15970.1  
AT5G55500 Orysa4|Os08g39380.1  
AT2G38580 Orysa4|Os03g21520.1  
AT5G14690,AT3G01516 Orysa4|Os05g49340.1,Orysa4|Os01g47280.1,Orysa4|Os01g45160.1  
AT3G56290  
Orysa4|Os01g60830.1  
AT3G15420  
Orysa4|Os04g44770.1  
AT5G50750  
AT3G02230,AT5G15650  
AT5G16510 Orysa4|Os04g56520.1  
AT3G08900 Orysa4|Os07g41360.1,Orysa4|Os03g40270.1  
AT1G63210,AT1G65440 Orysa4|Os05g41510.1  
AT1G78650 Orysa4|Os01g10690.1  
AT1G61850 Orysa4|Os07g33670.1  
Orysa4|Os11g04600.1,Orysa4|Os12g04410.1  
AT2G41370,AT3G57130 Orysa4|Os01g72020.1  
AT3G60340  
Orysa4|Os10g41340.1,Orysa4|Os03g01150.1  
AT4G17483,AT4G17480,AT4G17470,AT5G47340,AT5G47330,AT5G47350  
AT5G12950,AT5G12960 Orysa4|Os06g41030.1,Orysa4|Os06g41020.1  
AT4G24500 Orysa4|Os02g30640.1  
AT1G77220 Orysa4|Os05g44080.1  
AT1G23070 Orysa4|Os03g29340.1  
Orysa4|Os04g47530.1,Orysa4|Os02g44910.1  
AT4G38360 Orysa4|Os06g51100.1  
AT5G06590 Orysa4|Os12g42840.1  
AT4G14990,AT3G22270,AT1G79090  
Orysa4|Os02g19220.1,Orysa4|Os02g19330.1,Orysa4|Os01g56300.1,Orysa4|Os02g31220.1  
AT1G05577 Orysa4|Os09g39750.1  
Orysa4|Os01g74370.1  
AT2G28150 Orysa4|Os08g44760.1,Orysa4|Os03g48600.1  
AT3G46110,AT5G59790 Orysa4|Os01g62200.1  
AT5G10150 Orysa4|Os03g09200.1

AT2G38830  
AT5G13860,AT3G12400 Orysa4|Os02g58640.1  
AT5G35980 Orysa4|Os04g51370.1,Orysa4|Os02g47410.1  
AT5G40950 Orysa4|Os01g69950.1  
AT2G23740 Orysa4|Os02g47890.1  
Orysa4|Os02g47900.1  
AT1G64405 Orysa4|Os02g15540.1,Orysa4|Os06g33880.1,Orysa4|Os08g07860.1  
AT4G03560 Orysa4|Os01g48680.1  
AT1G66510 Orysa4|Os04g04320.1  
AT1G14660,AT2G01980 Orysa4|Os12g44360.1  
AT3G57910 Orysa4|Os08g39880.1  
Orysa4|Os10g34580.1  
AT3G02680  
AT5G12300 Orysa4|Os01g72420.1  
AT1G50530  
AT5G55530,AT1G50570 Orysa4|Os07g39620.1,Orysa4|Os03g09840.1  
AT1G12840 Orysa4|Os05g51530.1  
AT5G06380,AT3G11690,AT2G27180  
Orysa4|Os10g25800.1,Orysa4|Os03g53930.1,Orysa4|Os08g35320.1,Orysa4|Os01g15510.1,Orysa4|Os04  
g11860.1,Orysa4|Os12g42650.1  
AT3G18800 Orysa4|Os04g59050.1  
AT5G20290,AT5G59240  
Orysa4|Os04g28180.1,Orysa4|Os02g28810.1  
Orysa4|Os12g41220.1  
Orysa4|Os04g58800.1  
AT3G52560,AT2G36060 Orysa4|Os09g12570.1  
AT1G70660,AT1G23260 Orysa4|Os03g50440.1  
AT3G25120 Orysa4|Os04g30740.1  
Orysa4|Os01g40840.1  
AT4G24740 Orysa4|Os12g27520.1  
AT3G53570 Orysa4|Os01g62080.1  
AT4G32660  
AT1G32130 Orysa4|Os01g05420.1  
AT4G19000  
AT5G17290 Orysa4|Os02g02570.1  
AT5G38460 Orysa4|Os07g07010.1  
Orysa4|Os04g47970.1,Orysa4|Os02g45180.1,Orysa4|Os07g26940.1  
AT5G42000  
AT1G01230  
AT1G17980  
Orysa4|Os04g49870.1  
AT2G25850,AT4G32850 Orysa4|Os02g13400.1,Orysa4|Os06g36360.1  
AT3G06560 Orysa4|Os07g48890.1,Orysa4|Os03g19920.1  
AT5G02670  
Orysa4|Os06g21470.1  
Orysa4|Os01g50730.1  
AT5G51510 Orysa4|Os10g36480.1  
AT4G38225 Orysa4|Os03g03670.1  
AT5G11880,AT3G14390 Orysa4|Os02g24354.1  
AT3G62840,AT2G47640 Orysa4|Os05g24970.1  
Orysa4|Os01g73604.1  
Orysa4|Os12g19430.1,Orysa4|Os01g58000.1  
AT1G05205 Orysa4|Os06g46700.1  
Orysa4|Os03g49610.1,Orysa4|Os03g49600.1  
AT2G44470,AT2G44460,AT3G60140,AT5G24550,AT5G24540,AT2G44490,AT3G60120,AT3G21370,AT1G52400,AT1  
G75940,AT1G66270,AT1G66280,AT3G09260,AT5G28510,AT3G03640,AT2G32860  
AT5G26000,AT5G25980,AT5G48375,AT1G51470,AT1G47600,AT1G51490  
Orysa4|Os04g43380.1,Orysa4|Os04g43390.1,Orysa4|Os04g43410.1,Orysa4|Os04g43360.1  
Orysa4|Os03g20710.1  
Orysa4|Os09g33680.1,Orysa4|Os09g33710.1  
AT1G26560 Orysa4|Os10g17650.1,Orysa4|Os03g11420.1  
Orysa4|Os04g43400.1  
AT5G36890 Orysa4|Os01g67220.1  
AT2G44480  
AT5G54570 Orysa4|Os06g46940.1  
Orysa4|Os05g30320.1  
Orysa4|Os12g23170.1  
AT5G44640,AT5G42260,AT2G25630,AT2G44450,AT3G60130  
Orysa4|Os04g39900.1,Orysa4|Os04g39880.1,Orysa4|Os04g39840.1,Orysa4|Os04g39864.1,Orysa4|Os04  
g39814.1,Orysa4|Os09g31410.1,Orysa4|Os09g31430.1,Orysa4|Os08g39860.1  
AT3G18070,AT3G18080 Orysa4|Os01g32364.1  
AT4G27820,AT4G27830,AT3G62740,AT3G62750,AT5G16580,AT4G22100,AT1G45191,AT1G60090,AT1G02850  
Orysa4|Os05g30390.1,Orysa4|Os05g30350.1,Orysa4|Os01g59840.1,Orysa4|Os01g59819.1,Orysa4|Os01  
g70520.1,Orysa4|Os05g30280.1,Orysa4|Os05g30250.1,Orysa4|Os05g30300.1  
AT5G48175  
AT4G21760,AT1G61810,AT1G61820  
AT5G56280,AT4G26430 Orysa4|Os08g39070.1  
Orysa4|Os12g42810.1,Orysa4|Os12g42730.1  
Orysa4|Os07g29440.1,Orysa4|Os01g22010.1,Orysa4|Os01g18860.1,Orysa4|Os05g04510.1  
AT3G17390  
AT2G36880  
AT1G02500,AT4G01850



Orysa4|Os03g18990.1,Orysa4|Os04g50212.1,Orysa4|Os10g34490.1  
Orysa4|Os11g04380.1,Orysa4|Os12g04170.1  
AT3G17430,AT1G48230 Orysa4|Os03g49570.1  
AT4G32390,AT2G25520,AT5G25400,AT5G11230 Orysa4|Os05g41480.1,Orysa4|Os01g58870.1  
AT3G14410,AT1G53660 Orysa4|Os08g04110.1  
Orysa4|Os03g17220.1  
AT1G07730,AT2G28670 Orysa4|Os01g06250.1  
AT3G55230,AT2G39430  
Orysa4|Os01g62030.1  
AT2G16060  
Orysa4|Os03g12510.1,Orysa4|Os03g13140.1,Orysa4|Os03g13160.1,Orysa4|Os03g13150.1,Orysa4|Os05  
g44140.1  
AT3G10520  
Orysa4|Os03g14450.1,Orysa4|Os10g08550.1,Orysa4|Os06g04510.1  
AT1G74030 Orysa4|Os09g20820.1  
AT2G29560  
AT2G36530  
Orysa4|Os04g58320.1,Orysa4|Os07g46700.1  
Orysa4|Os10g30850.1  
AT1G24440,AT1G13195 Orysa4|Os01g67850.1,Orysa4|Os07g17400.1  
AT5G58787,AT3G47160,AT5G01520  
Orysa4|Os10g35670.1  
AT3G62790,AT2G47690 Orysa4|Os08g44250.1  
AT5G49945,AT4G24330 Orysa4|Os05g35710.1  
AT5G49930 Orysa4|Os12g37720.1  
Orysa4|Os07g08420.1,Orysa4|Os03g58250.1  
AT5G28770  
AT5G24800  
Orysa4|Os12g40920.1  
Orysa4|Os02g07840.1,Orysa4|Os02g16680.1,Orysa4|Os06g45140.1  
AT3G54620,AT4G02640  
AT5G49880 Orysa4|Os01g65580.1  
Orysa4|Os03g63910.1  
AT1G15370  
AT5G43750  
Orysa4|Os01g70400.1  
AT5G23920  
AT1G27990 Orysa4|Os04g31710.1  
AT5G52420 Orysa4|Os10g40040.1  
Orysa4|Os01g11230.1  
AT1G78460  
AT1G78450,AT1G17100  
AT3G26380 Orysa4|Os01g33420.1  
AT1G80200,AT5G11280 Orysa4|Os01g37480.1  
AT4G02460 Orysa4|Os02g37920.1  
AT1G67960 Orysa4|Os03g50730.1  
AT2G06020  
Orysa4|Os07g25710.1,Orysa4|Os03g21240.1  
Orysa4|Os02g47190.1  
Orysa4|Os12g01490.1,Orysa4|Os06g35140.1  
AT1G14600  
AT5G16560 Orysa4|Os08g33050.1,Orysa4|Os08g06370.1  
AT5G45580  
Orysa4|Os09g23200.1  
AT3G12730  
AT4G13640,AT3G24120  
AT3G04030,AT5G18240 Orysa4|Os07g48596.1,Orysa4|Os03g20900.1  
AT4G28610  
AT2G20400  
Orysa4|Os05g40960.1  
AT4G04580  
Orysa4|Os04g47890.1  
AT2G01060 Orysa4|Os09g12770.1,Orysa4|Os08g25820.1  
AT3G13040 Orysa4|Os06g49040.1,Orysa4|Os02g04640.1  
AT2G38300  
Orysa4|Os02g07170.1  
AT2G42660  
Orysa4|Os09g12750.1,Orysa4|Os08g25799.1  
AT1G32240,AT4G17695 Orysa4|Os03g55760.1,Orysa4|Os02g46940.1  
Orysa4|Os05g41240.1  
AT5G29000,AT3G04450  
AT5G42630  
Orysa4|Os01g52820.1  
AT2G40260  
AT1G79430 Orysa4|Os06g45410.1,Orysa4|Os02g07770.1  
Orysa4|Os03g03760.1,Orysa4|Os10g39550.1  
Orysa4|Os06g45890.1  
AT1G69580  
Orysa4|Os08g23189.1  
AT5G06800 Orysa4|Os04g56990.1  
Orysa4|Os04g51130.1  
Orysa4|Os01g16680.1

AT2G41520 Orysa4|Os05g31056.1  
Orysa4|Os05g31062.1  
AT5G12430  
AT5G21920 Orysa4|Os03g08080.1  
Orysa4|Os11g34830.1  
AT5G24810 Orysa4|Os06g48770.1  
AT5G01430,AT3G49420  
AT1G05785 Orysa4|Os10g19190.1  
AT3G03180  
AT3G63220 Orysa4|Os10g24900.1  
AT5G64200 Orysa4|Os03g27030.1,Orysa4|Os07g43050.1  
Orysa4|Os08g37960.1  
AT3G57890,AT2G42230 Orysa4|Os02g10130.1,Orysa4|Os06g41110.1  
AT2G45520 Orysa4|Os06g03090.1,Orysa4|Os06g03920.1  
AT1G49030,AT3G18470,AT3G18450,AT3G18460  
Orysa4|Os06g32910.1  
Orysa4|Os03g61500.1,Orysa4|Os03g61470.1  
AT2G40935  
AT1G68630,AT1G58320  
AT1G52200  
AT1G14880,AT1G14870,AT5G35525 Orysa4|Os02g36950.1,Orysa4|Os02g36940.1  
Orysa4|Os06g15590.1,Orysa4|Os03g61480.1,Orysa4|Os03g61430.1,Orysa4|Os02g18540.1  
Orysa4|Os10g02300.1  
AT1G68610  
Orysa4|Os02g52550.1  
Orysa4|Os03g61440.1  
AT1G14030 Orysa4|Os09g24530.1  
AT5G15000,AT5G14990 Orysa4|Os04g44090.1  
AT2G34730 Orysa4|Os03g57110.1,Orysa4|Os12g41810.1  
Orysa4|Os09g04810.1  
AT5G15270  
AT1G51580 Orysa4|Os09g32300.1  
AT1G14170  
AT5G53060 Orysa4|Os06g23460.1  
AT5G09560,AT5G64390,AT2G22600  
AT2G03110 Orysa4|Os10g35220.1  
Orysa4|Os07g25740.1  
Orysa4|Os03g25970.1  
Orysa4|Os01g13470.1  
AT5G46190 Orysa4|Os08g10030.1  
AT2G45380  
AT4G22740 Orysa4|Os08g02460.1  
Orysa4|Os06g04390.1  
AT5G64670 Orysa4|Os08g21840.1  
AT4G17070 Orysa4|Os03g01090.1  
AT1G69070 Orysa4|Os03g40110.1  
AT1G13920,AT1G69325,AT5G61280 Orysa4|Os10g17790.1,Orysa4|Os03g11300.1  
AT5G16240,AT3G02630  
AT1G43800 Orysa4|Os01g65830.1  
AT2G43710 Orysa4|Os01g69080.1  
Orysa4|Os06g30780.1,Orysa4|Os03g53010.1,Orysa4|Os08g10010.1,Orysa4|Os08g09950.1  
AT3G02620,AT3G02610,AT5G16230  
AT5G53020 Orysa4|Os01g36970.1  
AT5G66180 Orysa4|Os02g21510.1  
AT4G29590  
AT3G01660 Orysa4|Os04g40530.1  
Orysa4|Os01g51530.1  
AT4G30580 Orysa4|Os10g35390.1  
AT3G29100,AT5G39510  
AT5G39630 Orysa4|Os01g37990.1  
AT1G26670 Orysa4|Os01g37980.1,Orysa4|Os01g51120.1  
AT5G04430 Orysa4|Os02g57640.1  
AT2G33990  
AT2G26180 Orysa4|Os01g09790.1  
AT4G14750 Orysa4|Os10g28420.1,Orysa4|Os03g06570.1  
Orysa4|Os01g51230.1,Orysa4|Os05g46350.1  
AT3G22190 Orysa4|Os03g57330.1  
AT3G15050 Orysa4|Os06g06160.1  
AT3G49380  
Orysa4|Os05g38790.1  
AT3G49260,AT5G62070,AT5G07240,AT3G16490,AT1G51960,AT4G29150  
AT3G09710,AT5G03040  
AT3G59690 Orysa4|Os01g67090.1  
Orysa4|Os05g03190.1  
Orysa4|Os03g44610.1,Orysa4|Os12g42430.1  
AT1G17480,AT1G72670  
AT3G51380 Orysa4|Os06g23390.1,Orysa4|Os03g04210.1  
Orysa4|Os06g23380.1,Orysa4|Os02g19640.1  
AT5G35670  
AT2G26410  
AT3G52290  
Orysa4|Os12g41160.1,Orysa4|Os03g43580.1

Orysa4|Os01g61720.1  
AT5G13460,AT1G76705,AT5G03960 Orysa4|Os03g23960.1  
Orysa4|Os01g53980.1,Orysa4|Os05g44630.1  
AT5G38420,AT5G38430,AT5G38410,AT1G67090  
Orysa4|Os12g19470.1,Orysa4|Os12g17600.1,Orysa4|Os12g19394.1  
Orysa4|Os02g05830.1  
AT5G07670,AT5G51380,AT5G51370 Orysa4|Os02g44104.1  
AT3G10650 Orysa4|Os03g57430.1,Orysa4|Os12g27090.1  
Orysa4|Os02g44510.1  
AT1G71220  
AT3G19130,AT1G49600  
AT5G54900,AT4G27000  
AT1G11650Orysa4|Os08g09100.1,Orysa4|Os04g53440.1,Orysa4|Os03g37270.1,Orysa4|Os07g33330.1  
AT5G19350 Orysa4|Os03g07800.1  
AT1G47490,AT1G47500 Orysa4|Os02g35950.1,Orysa4|Os04g37690.1,Orysa4|Os09g28810.1  
AT5G55030  
AT1G76380,AT1G20670 Orysa4|Os03g03870.1,Orysa4|Os09g37760.1  
AT5G55040 Orysa4|Os07g32760.1  
Orysa4|Os03g21450.1  
AT4G17020 Orysa4|Os04g58350.1  
Orysa4|Os03g50410.1  
Orysa4|Os07g29794.1  
Orysa4|Os09g39580.1  
AT5G37710 Orysa4|Os06g14490.1  
AT3G49050,AT4G00500  
AT4G01040 Orysa4|Os01g43220.1  
AT5G67030 Orysa4|Os04g37619.1  
AT5G17650,AT4G19200,AT5G45350,AT2G04063,AT1G31750  
Orysa4|Os07g39680.1  
AT2G32260  
AT4G15130 Orysa4|Os10g42790.1  
Orysa4|Os08g06450.1  
Orysa4|Os02g07720.1  
AT3G18640  
AT2G33835 Orysa4|Os03g37140.1,Orysa4|Os05g41790.1  
AT3G26850  
Orysa4|Os08g04170.1  
AT3G10370 Orysa4|Os04g14790.1  
AT4G04955 Orysa4|Os04g58390.1  
AT5G18150  
AT5G58375 Orysa4|Os11g02200.1  
AT3G43700,AT5G21010  
Orysa4|Os04g18830.1  
AT2G39760  
Orysa4|Os08g31420.1,Orysa4|Os08g31430.1,Orysa4|Os08g12960.1,Orysa4|Os08g13030.1,Orysa4|Os08g12970.1,Orysa4|Os08g13020.1,Orysa4|Os08g13060.1,Orysa4|Os08g13070.1,Orysa4|Os08g13090.1,Orysa4|Os08g03500.1,Orysa4|Os08g13180.1,Orysa4|Os08g03470.1  
Orysa4|Os10g28130.1  
Orysa4|Os08g41200.1,Orysa4|Os08g41190.1,Orysa4|Os08g41240.1,Orysa4|Os03g48120.1,Orysa4|Os09g06890.1,Orysa4|Os08g41120.1,Orysa4|Os08g41180.1,Orysa4|Os08g41150.1,Orysa4|Os08g41170.1,Orysa4|Os08g40490.1,Orysa4|Os08g40460.1,Orysa4|Os09g16870.1,Orysa4|Os09g16850.1,Orysa4|Os08g13130.1  
Orysa4|Os02g20720.1,Orysa4|Os02g20590.1,Orysa4|Os02g20690.1,Orysa4|Os08g09830.1,Orysa4|Os08g03540.1,Orysa4|Os02g20600.1,Orysa4|Os06g45730.1,Orysa4|Os06g14060.1,Orysa4|Os06g45720.1,Orysa4|Os11g41350.1,Orysa4|Os10g28780.1,Orysa4|Os10g28770.1,Orysa4|Os10g28760.1,Orysa4|Os10g28810.1,Orysa4|Os10g29020.1,Orysa4|Os10g29050.1,Orysa4|Os10g28820.1,Orysa4|Os10g29330.1,Orysa4|Os10g29290.1,Orysa4|Os10g29230.1,Orysa4|Os10g29320.1,Orysa4|Os10g29310.1,Orysa4|Os10g29180.1,Orysa4|Os10g29260.1,Orysa4|Os10g29220.1,Orysa4|Os10g29360.1,Orysa4|Os10g29340.1,Orysa4|Os10g29340.1,Orysa4|Os10g29120.1,Orysa4|Os10g29100.1,Orysa4|Os10g29150.1,Orysa4|Os10g29390.1,Orysa4|Os10g29110.1,Orysa4|Os04g35340.1,Orysa4|Os04g35310.1,Orysa4|Os04g35370.1,Orysa4|Os10g29740.1,Orysa4|Os10g29850.1,Orysa4|Os10g30040.1,Orysa4|Os10g29750.1,Orysa4|Os10g29920.1,Orysa4|Os10g29810.1,Orysa4|Os10g29950.1,Orysa4|Os10g29790.1,Orysa4|Os10g30360.1,Orysa4|Os10g30350.1,Orysa4|Os10g28870.1,Orysa4|Os10g28970.1,Orysa4|Os10g28980.1,Orysa4|Os11g40680.1,Orysa4|Os04g53430.1,Orysa4|Os04g53410.1,Orysa4|Os04g53400.1,Orysa4|Os04g53390.1  
Orysa4|Os05g44530.1,Orysa4|Os10g29440.1,Orysa4|Os10g29410.1,Orysa4|Os08g13250.1,Orysa4|Os08g03510.1,Orysa4|Os08g03530.1,Orysa4|Os08g03490.1  
Orysa4|Os08g03480.1,Orysa4|Os08g25240.1  
AT5G19000,AT3G06190  
Orysa4|Os11g41360.1  
Orysa4|Os07g20130.1,Orysa4|Os10g29820.1,Orysa4|Os11g41230.1,Orysa4|Os11g41240.1,Orysa4|Os11g41250.1  
Orysa4|Os10g28840.1,Orysa4|Os10g28860.1,Orysa4|Os11g45560.1,Orysa4|Os11g41290.1,Orysa4|Os11g41310.1,Orysa4|Os11g40220.1  
Orysa4|Os08g12930.1  
Orysa4|Os08g41230.1,Orysa4|Os08g41220.1,Orysa4|Os11g24550.1  
AT3G03740 Orysa4|Os07g07270.1,Orysa4|Os03g57854.1  
Orysa4|Os12g34820.1,Orysa4|Os11g40480.1  
Orysa4|Os10g29460.1  
Orysa4|Os06g45790.1  
Orysa4|Os10g29370.1  
Orysa4|Os06g45770.1,Orysa4|Os05g44540.1  
Orysa4|Os07g46160.1  
Orysa4|Os07g17120.1  
AT2G44060 Orysa4|Os03g62620.1

AT3G07560 Orysa4|Os03g57210.1,Orysa4|Os07g05810.1  
AT3G05630  
AT3G16785 Orysa4|Os01g20860.1,Orysa4|Os05g29050.1  
AT2G23090 Orysa4|Os07g02340.1  
AT4G00020,AT5G01630,AT4G00010 Orysa4|Os01g07110.1  
AT1G63990 Orysa4|Os08g06050.1  
AT5G02820  
AT3G13170 Orysa4|Os12g42760.1  
AT5G03110,AT2G37100 Orysa4|Os05g03440.1  
AT3G52115Orysa4|Os06g41050.1  
AT1G05780,AT2G31710 Orysa4|Os04g52300.1  
AT2G31305 Orysa4|Os04g22860.1,Orysa4|Os05g18774.1  
AT2G39340 Orysa4|Os05g38730.1,Orysa4|Os01g61930.1  
AT5G57320,AT4G30160 Orysa4|Os08g14230.1,Orysa4|Os04g51440.1  
AT2G29890  
AT2G41740,AT3G57410 Orysa4|Os03g24220.1  
Orysa4|Os06g44890.1  
AT4G06599 Orysa4|Os01g65450.1  
AT5G07980,AT5G07940,AT5G07970,AT3G29385 Orysa4|Os03g54970.1,Orysa4|Os10g16640.1  
AT4G13730,AT1G04830 Orysa4|Os01g68010.1  
Orysa4|Os04g30880.1,Orysa4|Os11g28990.1  
Orysa4|Os10g33350.1  
AT3G07090 Orysa4|Os02g56900.1  
AT2G35720 Orysa4|Os10g36370.1  
AT2G35690,AT4G16760 Orysa4|Os06g01390.1  
AT3G54130 Orysa4|Os01g63250.1  
AT5G54750 Orysa4|Os07g44790.1,Orysa4|Os03g28400.1  
AT5G06620 Orysa4|Os10g27060.1  
AT4G00416,AT3G63030,AT4G22745 Orysa4|Os05g33550.1  
AT4G13350,AT4G32630 Orysa4|Os05g45840.1  
AT5G16060  
Orysa4|Os03g15240.1  
AT3G54020,AT2G37940 Orysa4|Os05g37910.1,Orysa4|Os01g63060.1,Orysa4|Os05g21180.1  
AT2G29525 Orysa4|Os09g36990.1  
AT5G66090  
AT4G28450 Orysa4|Os01g13730.1  
Orysa4|Os01g19140.1  
AT2G45270  
AT2G35470 Orysa4|Os04g50780.1,Orysa4|Os02g46830.1,Orysa4|Os10g42520.1  
AT3G54470 Orysa4|Os01g72250.1,Orysa4|Os01g72240.1  
AT5G64270 Orysa4|Os02g05410.1,Orysa4|Os02g05310.1,Orysa4|Os02g27790.1,Orysa4|Os02g04950.1  
AT5G65620,AT5G10540 Orysa4|Os02g58340.1  
AT4G19460 Orysa4|Os10g18310.1,Orysa4|Os08g34000.1  
AT5G59070  
AT1G73160  
AT2G33490,AT5G41100,AT3G26910 Orysa4|Os02g31080.1,Orysa4|Os04g32370.1,Orysa4|Os09g33510.1  
AT4G36090,AT2G17970,AT1G48980 Orysa4|Os06g04660.1  
AT5G40820 Orysa4|Os06g50910.1  
Orysa4|Os02g32460.1  
AT5G55130 Orysa4|Os02g56050.1  
AT3G50910,AT5G66480 Orysa4|Os02g47580.1  
AT4G29380 Orysa4|Os02g55340.1  
Orysa4|Os01g05820.1,Orysa4|Os01g05810.1  
AT4G29210  
AT4G39650,AT4G39640,AT1G69820 Orysa4|Os04g38450.1  
Orysa4|Os08g31730.1,Orysa4|Os02g27730.1  
AT3G07630 Orysa4|Os03g17730.1  
AT1G11790 Orysa4|Os09g39230.1,Orysa4|Os09g39260.1,Orysa4|Os04g33390.1  
AT5G22630,AT3G44720,AT1G08250,AT2G27820  
Orysa4|Os04g55780.1,Orysa4|Os06g45930.1  
Orysa4|Os08g33260.1,Orysa4|Os07g32774.1  
Orysa4|Os12g31910.1  
AT5G07780,AT5G07760,AT5G07650,AT5G07770  
Orysa4|Os10g02980.1  
Orysa4|Os08g17820.1  
Orysa4|Os04g17120.1  
Orysa4|Os07g40520.1  
AT1G31810  
AT3G32410,AT2G25050 Orysa4|Os03g31446.1  
AT5G58160  
Orysa4|Os07g29890.1  
Orysa4|Os06g08540.1  
Orysa4|Os02g55170.1  
Orysa4|Os07g40510.1  
Orysa4|Os03g48190.1  
Orysa4|Os03g31460.1,Orysa4|Os04g17130.1  
AT3G32400  
Orysa4|Os08g15630.1  
Orysa4|Os02g55150.1

AT1G42980  
AT4G35760 Orysa4|Os03g03949.1  
AT4G23060 Orysa4|Os04g48160.1  
AT1G21930,AT3G42150 Orysa4|Os12g29670.1  
AT5G08270,AT5G23200 Orysa4|Os02g42300.1  
Orysa4|Os04g56500.1  
AT2G43060 Orysa4|Os05g06520.1  
AT5G49670  
AT5G49680 Orysa4|Os03g23030.1  
Orysa4|Os03g47760.1  
AT1G58250  
Orysa4|Os11g16550.1  
AT3G59400  
AT5G58520,AT5G07140 Orysa4|Os03g18430.1  
AT2G38500 Orysa4|Os01g60800.1  
AT1G79760 Orysa4|Os01g54090.1  
AT2G42840 Orysa4|Os02g13660.1,Orysa4|Os06g35970.1,Orysa4|Os01g10490.1  
AT1G36020,AT1G35530  
Orysa4|Os11g07870.1  
AT5G63905 Orysa4|Os12g32580.1  
AT1G56440 Orysa4|Os05g03910.1  
AT2G03150 Orysa4|Os06g36710.1  
AT5G14200,AT1G31180,AT1G80560 Orysa4|Os03g45320.1  
AT1G16040 Orysa4|Os03g03690.1  
AT4G39630 Orysa4|Os08g19370.1  
AT1G22410 Orysa4|Os08g37790.1  
Orysa4|Os07g42960.1  
AT4G33510  
AT4G39980  
Orysa4|Os10g41480.1  
AT4G38750 Orysa4|Os10g06610.1  
AT1G10790  
AT3G10810,AT3G56590 Orysa4|Os05g30990.1,Orysa4|Os01g71220.1  
Orysa4|Os02g52910.1  
Orysa4|Os09g28110.1  
Orysa4|Os04g41480.1  
AT2G35640,AT1G31310 Orysa4|Os04g57530.1  
AT1G80000,AT1G15280 Orysa4|Os05g45830.1,Orysa4|Os01g41190.1  
AT5G07630  
Orysa4|Os07g30250.1  
AT1G64180,AT5G41620,AT2G46250 Orysa4|Os06g31190.1,Orysa4|Os02g15980.1  
Orysa4|Os05g45730.1,Orysa4|Os01g52214.1  
AT5G11770  
Orysa4|Os07g02580.1,Orysa4|Os03g30610.1  
AT4G24880 Orysa4|Os01g01130.1  
AT2G18990,AT3G25580 Orysa4|Os08g15204.1  
AT3G02650  
Orysa4|Os08g07040.1,Orysa4|Os06g08120.1,Orysa4|Os03g39520.1  
Orysa4|Os08g07050.1  
AT1G07200,AT2G29970,AT2G40130 Orysa4|Os11g01330.1,Orysa4|Os12g01360.1  
AT2G24860 Orysa4|Os09g25590.1  
AT1G77855,AT1G22030 Orysa4|Os08g01400.1,Orysa4|Os01g65420.1,Orysa4|Os02g34710.1  
AT3G13480,AT1G55475 Orysa4|Os03g58090.1  
AT4G39280 Orysa4|Os10g26130.1  
Orysa4|Os02g49150.1  
AT5G09920 Orysa4|Os02g02510.1  
AT5G23060 Orysa4|Os02g49680.1  
AT1G30450 Orysa4|Os08g23440.1,Orysa4|Os01g19850.1  
Orysa4|Os01g19860.1  
AT4G24520  
AT4G30210 Orysa4|Os08g14570.1,Orysa4|Os04g55960.1,Orysa4|Os09g38620.1  
AT3G02280 Orysa4|Os01g53250.1  
AT3G24710  
AT3G20480 Orysa4|Os07g01200.1  
AT3G48830,AT5G23690,AT1G28090 Orysa4|Os04g32490.1  
Orysa4|Os03g03930.1  
AT2G17580  
AT3G04580 Orysa4|Os04g08740.1  
AT2G40940  
Orysa4|Os07g28060.1  
AT3G23150,AT1G04310  
Orysa4|Os06g38130.1,Orysa4|Os02g57530.1  
AT1G66340 Orysa4|Os03g49500.1  
Orysa4|Os06g15900.1,Orysa4|Os07g15540.1  
AT5G53620 Orysa4|Os08g43060.1  
AT3G29180,AT5G39430,AT1G13970 Orysa4|Os03g55180.1  
AT1G10410,AT1G59650 Orysa4|Os03g48660.1  
AT4G02510 Orysa4|Os05g05950.1  
AT1G02280,AT5G05000 Orysa4|Os03g13730.1  
Orysa4|Os01g25450.1  
Orysa4|Os03g61890.1  
AT2G16640,AT3G16620 Orysa4|Os10g40110.1

AT5G20300 Orysa4|Os12g09570.1  
AT4G15810  
AT4G02482 Orysa4|Os10g40750.1  
Orysa4|Os02g48800.1,Orysa4|Os06g20410.1  
AT3G20280,AT1G50620 Orysa4|Os02g48810.1  
AT3G24200 Orysa4|Os03g62260.1  
Orysa4|Os06g11280.1,Orysa4|Os06g11240.1,Orysa4|Os06g11260.1,Orysa4|Os06g11200.1  
Orysa4|Os01g27240.1  
Orysa4|Os01g27230.1,Orysa4|Os06g11250.1,Orysa4|Os02g35310.1  
AT2G06050 Orysa4|Os08g35740.1  
AT1G76680,AT1G76690,AT1G09400,AT1G17990,AT1G18020  
Orysa4|Os04g45990.1  
AT2G22740,AT2G35160 Orysa4|Os09g19830.1  
AT4G13460,AT2G33290 Orysa4|Os07g25450.1  
AT5G47150,AT5G47160  
Orysa4|Os08g30870.1,Orysa4|Os08g30850.1,Orysa4|Os08g30910.1  
AT5G13960 Orysa4|Os01g70220.1  
Orysa4|Os08g45130.1  
AT3G03750  
AT5G04940,AT1G73100,AT2G24740,AT1G17770,AT2G05900  
Orysa4|Os05g41172.1,Orysa4|Os01g59620.1,Orysa4|Os11g03700.1,Orysa4|Os03g20430.1,Orysa4|Os11  
g38900.1  
AT3G47640 Orysa4|Os11g38870.1,Orysa4|Os07g43530.1  
AT4G36060  
AT3G19860 Orysa4|Os02g23823.1  
AT5G45760 Orysa4|Os01g10790.1  
AT5G26180 Orysa4|Os02g12600.1  
AT5G56900 Orysa4|Os09g19940.1  
Orysa4|Os08g26990.1,Orysa4|Os08g28900.1  
AT2G07440,AT2G41310,AT3G57040 Orysa4|Os11g04720.1,Orysa4|Os12g04500.1  
Orysa4|Os04g36070.1  
Orysa4|Os04g44280.1,Orysa4|Os02g42060.1,Orysa4|Os07g26720.1,Orysa4|Os02g58350.1,Orysa4|Os04  
g57720.1,Orysa4|Os01g72330.1  
AT1G74890,AT1G19050,AT5G62920,AT3G48100,AT1G59940,AT1G10470,AT2G40670,AT3G56380  
AT1G30070 Orysa4|Os01g55270.1  
AT2G47730,AT1G02930,AT1G02920,AT4G02520,AT2G02930,AT1G02950,AT1G02940,AT1G49860  
Orysa4|Os03g04260.1  
Orysa4|Os03g04250.1,Orysa4|Os03g04240.1,Orysa4|Os08g43680.1  
AT2G30860,AT2G30870  
Orysa4|Os09g37240.1  
Orysa4|Os01g70770.1  
AT3G03190,AT5G17220  
AT3G62760 Orysa4|Os01g27360.1,Orysa4|Os01g27340.1,Orysa4|Os01g27260.1,Orysa4|Os01g27300.1,Orysa4|Os01  
g25100.1,Orysa4|Os01g27210.1,Orysa4|Os01g55830.1,Orysa4|Os05g05610.1,Orysa4|Os01g27380.1,Orysa4|Os01g  
27480.1  
Orysa4|Os03g04220.1,Orysa4|Os10g39740.1  
AT4G29870,AT2G19340 Orysa4|Os02g21080.1  
AT4G30000,AT1G69190 Orysa4|Os07g42632.1  
AT3G24820,AT1G69030,AT1G26300 Orysa4|Os02g09500.1,Orysa4|Os02g49450.1  
Orysa4|Os10g25430.1  
AT1G07010  
AT1G71440 Orysa4|Os05g01500.1  
AT3G13970,AT1G54210 Orysa4|Os06g10340.1  
AT4G35910 Orysa4|Os12g39840.1  
AT5G45320 Orysa4|Os06g49650.1  
AT5G06830 Orysa4|Os06g21560.1  
AT1G71780 Orysa4|Os01g08950.1,Orysa4|Os01g51800.1  
AT4G24290 Orysa4|Os01g72860.1,Orysa4|Os07g07194.1  
AT1G29690 Orysa4|Os01g54510.1  
AT1G28380 Orysa4|Os05g48360.1  
Orysa4|Os02g27480.1  
AT1G14780 Orysa4|Os06g14050.1,Orysa4|Os02g50340.1  
AT1G08520 Orysa4|Os03g59640.1  
Orysa4|Os08g14310.1,Orysa4|Os06g44870.1  
AT5G43150 Orysa4|Os07g02460.1,Orysa4|Os03g10860.1  
AT4G28030 Orysa4|Os08g16010.1  
Orysa4|Os01g49150.1  
AT5G38110,AT1G66740  
Orysa4|Os05g48030.1  
Orysa4|Os08g38650.1  
AT1G65810,AT1G65780  
Orysa4|Os10g02930.1  
AT2G19120,AT4G30100  
AT5G47010 Orysa4|Os09g32190.1,Orysa4|Os01g34830.1  
Orysa4|Os04g49320.1,Orysa4|Os04g49340.1  
Orysa4|Os02g45910.1  
AT4G15570 Orysa4|Os03g32526.1,Orysa4|Os06g20500.1,Orysa4|Os04g34670.1  
AT5G52090,AT5G37150,AT5G37140,AT5G37160,AT5G37030,AT4G05540

Orysa4|Os06g04310.1  
Orysa4|Os11g42900.1,Orysa4|Os11g42910.1  
Orysa4|Os02g45900.1,Orysa4|Os04g49270.1,Orysa4|Os04g49310.1,Orysa4|Os10g39230.1  
AT1G16800 Orysa4|Os07g31340.1  
AT2G03270  
AT3G45020 Orysa4|Os09g37740.1  
AT5G67620 Orysa4|Os03g10320.1,Orysa4|Os10g21130.1  
AT1G10530,AT1G60010,AT5G50090,AT5G62900  
Orysa4|Os02g50810.1,Orysa4|Os06g12960.1,Orysa4|Os09g21380.1  
AT3G56230 Orysa4|Os12g02030.1  
AT1G78995  
Orysa4|Os06g49070.1,Orysa4|Os02g04550.1  
AT5G09240,AT5G09250 Orysa4|Os02g34840.1  
AT5G24105  
AT5G53250  
AT3G61640,AT2G46330 Orysa4|Os02g16500.1,Orysa4|Os01g46850.1  
Orysa4|Os10g06970.1  
AT4G10890 Orysa4|Os09g19880.1  
AT1G54070 Orysa4|Os08g35190.1,Orysa4|Os09g26620.1  
AT5G47880  
Orysa4|Os05g31020.1,Orysa4|Os01g71270.1  
Orysa4|Os07g39870.1,Orysa4|Os03g49580.1  
AT3G26618,AT1G12920  
AT1G24480,AT4G24805 Orysa4|Os08g02600.1  
AT3G01910 Orysa4|Os12g25630.1  
Orysa4|Os01g17330.1  
AT3G55620  
AT2G39820  
AT2G06520 Orysa4|Os03g22370.1,Orysa4|Os07g47640.1  
Orysa4|Os01g59890.1  
AT2G27610 Orysa4|Os05g38190.1  
AT1G77010 Orysa4|Os03g63260.1  
Orysa4|Os11g37660.1  
AT4G39530 Orysa4|Os08g25280.1  
Orysa4|Os05g06150.1  
AT1G28690 Orysa4|Os03g25380.1  
Orysa4|Os11g01860.1  
AT2G41080 Orysa4|Os03g60200.1  
AT5G04780 Orysa4|Os12g06070.1  
AT4G13650 Orysa4|Os12g36620.1  
AT5G59600 Orysa4|Os03g16450.1  
AT4G39952 Orysa4|Os04g38980.1  
AT4G22760 Orysa4|Os08g06490.1  
AT1G64310 Orysa4|Os01g36540.1  
AT1G26900 Orysa4|Os08g38610.1  
Orysa4|Os06g12510.1  
AT1G33350 Orysa4|Os02g40750.1  
AT5G15300 Orysa4|Os03g07234.1  
AT4G20770 Orysa4|Os02g07050.1  
AT1G06140,AT2G17210  
AT3G47840 Orysa4|Os05g50460.1  
Orysa4|Os05g30690.1  
Orysa4|Os02g09800.1  
AT4G32430 Orysa4|Os07g47370.1  
Orysa4|Os10g34720.1  
AT5G44230 Orysa4|Os06g47920.1  
AT2G15690  
AT3G16610 Orysa4|Os01g74600.1  
AT3G22150 Orysa4|Os04g51350.1  
AT2G34400  
AT1G43980,AT1G23450,AT3G09040  
AT3G18970,AT1G69350  
AT1G77150,AT1G77170  
AT2G37310 Orysa4|Os03g17510.1  
AT1G32415  
Orysa4|Os03g19980.1  
AT5G48910,AT2G45350,AT4G18840  
AT2G33680 Orysa4|Os01g27650.1  
AT3G61170 Orysa4|Os01g66160.1  
AT2G25580,AT4G32450,AT2G34370,AT1G29710  
AT5G19020 Orysa4|Os01g29430.1  
AT4G18750 Orysa4|Os01g10800.1  
AT1G56690,AT1G09410 Orysa4|Os03g20190.1  
Orysa4|Os02g06880.1  
Orysa4|Os03g07330.1  
AT3G26630,AT1G04840  
AT5G56310 Orysa4|Os01g15530.1  
AT3G15930 Orysa4|Os01g08120.1  
Orysa4|Os01g21050.1  
AT2G22410 Orysa4|Os10g26070.1  
AT2G13600 Orysa4|Os04g35610.1

AT1G17630  
AT5G13230 Orysa4|Os03g32620.1  
Orysa4|Os03g13830.1  
AT2G33760 Orysa4|Os12g08140.1  
Orysa4|Os09g29850.1  
Orysa4|Os01g40680.1  
AT5G15340  
AT3G12770 Orysa4|Os07g15640.1,Orysa4|Os02g41560.1,Orysa4|Os09g24240.1,Orysa4|Os01g68610.1,Orysa4|Os06  
g11300.1  
Orysa4|Os01g41650.1  
AT3G62890  
Orysa4|Os03g42860.1  
AT5G39680 Orysa4|Os05g49740.1  
AT2G46050 Orysa4|Os07g15570.1  
AT1G15510 Orysa4|Os05g49920.1  
Orysa4|Os09g39970.1  
Orysa4|Os12g02280.1,Orysa4|Os11g02310.1,Orysa4|Os07g44300.1  
Orysa4|Os02g49830.1,Orysa4|Os04g01990.1  
AT1G34160 Orysa4|Os12g17080.1  
Orysa4|Os01g58630.1  
AT2G03880 Orysa4|Os06g27790.1  
Orysa4|Os11g29230.1  
Orysa4|Os03g11700.1  
AT4G37380 Orysa4|Os07g02280.1  
Orysa4|Os02g05720.1  
AT5G61800 Orysa4|Os04g32870.1  
Orysa4|Os07g10400.1  
Orysa4|Os06g05140.1  
AT2G36730 Orysa4|Os09g24640.1  
AT5G37570 Orysa4|Os04g33840.1  
AT4G33990 Orysa4|Os03g27880.1  
AT1G56570 Orysa4|Os01g19380.1  
AT1G74400 Orysa4|Os06g46840.1,Orysa4|Os06g02400.1,Orysa4|Os08g42610.1  
AT1G53600 Orysa4|Os08g03676.1  
AT3G02330 Orysa4|Os10g40920.1  
AT3G25060 Orysa4|Os10g39460.1  
AT3G29230 Orysa4|Os12g38880.1  
AT2G02750  
Orysa4|Os02g50280.1  
AT5G52850 Orysa4|Os03g64370.1  
AT1G31920 Orysa4|Os02g46980.1  
AT2G04860  
AT3G13880 Orysa4|Os03g62400.1,Orysa4|Os01g72930.1  
AT3G56550  
AT5G09950 Orysa4|Os01g40720.1  
AT5G08490 Orysa4|Os02g18810.1  
AT3G21470  
Orysa4|Os11g10740.1,Orysa4|Os12g03700.1  
AT4G04370 Orysa4|Os02g26940.1  
Orysa4|Os04g21910.1  
AT3G50420  
Orysa4|Os08g37520.1  
AT2G37320 Orysa4|Os11g17530.1,Orysa4|Os08g13990.1  
AT1G62260 Orysa4|Os06g12360.1  
AT5G50390 Orysa4|Os08g04400.1  
AT3G11460 Orysa4|Os01g60430.1  
AT1G74630 Orysa4|Os01g51810.1  
Orysa4|Os07g44170.1  
Orysa4|Os11g27240.1  
AT4G33170 Orysa4|Os03g38580.1  
AT1G71460 Orysa4|Os02g32780.1  
AT3G08820 Orysa4|Os11g01836.1,Orysa4|Os12g01850.1  
AT3G51320  
AT5G03800 Orysa4|Os07g07620.1  
AT3G05340 Orysa4|Os05g05490.1  
AT4G16470  
AT5G42450  
Orysa4|Os02g58330.1  
AT1G50270,AT2G29760  
AT1G59720 Orysa4|Os07g09370.1  
AT5G65570  
AT5G08310 Orysa4|Os10g30590.1  
AT1G18485,AT5G40410  
AT3G49170 Orysa4|Os05g12130.1  
Orysa4|Os01g20770.1  
AT4G14050 Orysa4|Os05g34570.1  
AT1G25360  
AT4G18520 Orysa4|Os03g44210.1  
Orysa4|Os12g15460.1  
AT4G02750  
AT4G38010 Orysa4|Os04g41120.1



AT1G20230 Orysa4|Os05g30710.1  
Orysa4|Os04g09530.1  
AT3G20730 Orysa4|Os04g53630.1  
AT1G08070  
AT1G11290 Orysa4|Os06g02200.1  
AT4G30700 Orysa4|Os06g08660.1  
AT3G14730  
AT1G31790  
AT3G24000 Orysa4|Os10g30760.1  
AT4G37170 Orysa4|Os03g13230.1  
AT3G57430 Orysa4|Os04g02850.1  
AT5G59200 Orysa4|Os03g60690.1  
AT1G03510 Orysa4|Os03g63510.1  
AT3G13770,AT3G14330  
Orysa4|Os04g43430.1,Orysa4|Os01g10090.1  
AT1G03540 Orysa4|Os06g40860.1  
Orysa4|Os09g38310.1  
AT2G21090 Orysa4|Os10g41740.1  
Orysa4|Os06g29290.1  
Orysa4|Os12g30620.1,Orysa4|Os01g68490.1  
AT1G10330 Orysa4|Os05g18950.1  
AT5G66500 Orysa4|Os03g42650.1  
AT4G14850 Orysa4|Os11g37330.1  
Orysa4|Os01g19790.1  
AT5G52630 Orysa4|Os01g46230.1  
AT1G22830,AT1G71490 Orysa4|Os08g02040.1,Orysa4|Os07g19400.1  
Orysa4|Os01g25270.1,Orysa4|Os09g07780.1  
AT3G26780 Orysa4|Os07g20420.1  
AT1G09220 Orysa4|Os01g60000.1  
AT4G19220 Orysa4|Os01g71180.1  
AT2G01510  
AT1G16480 Orysa4|Os11g45410.1  
Orysa4|Os04g21880.1  
Orysa4|Os07g14100.1  
Orysa4|Os01g53610.1  
AT1G05750 Orysa4|Os02g53050.1  
Orysa4|Os05g02210.1  
AT2G20540 Orysa4|Os05g36350.1  
AT2G02980 Orysa4|Os03g58100.1  
Orysa4|Os11g05980.1,Orysa4|Os08g39130.1,Orysa4|Os04g49520.1  
AT5G55740 Orysa4|Os01g42280.1  
Orysa4|Os11g29360.1,Orysa4|Os02g34960.1  
Orysa4|Os08g15090.1  
Orysa4|Os01g62220.1  
Orysa4|Os03g62690.1  
Orysa4|Os01g45840.1  
AT5G16860 Orysa4|Os05g23960.1,Orysa4|Os04g14130.1  
AT3G47530 Orysa4|Os08g33700.1  
AT2G35030 Orysa4|Os11g24530.1  
Orysa4|Os10g33730.1  
Orysa4|Os11g14980.1  
AT2G03380,AT5G39350,AT3G01580  
AT3G05240 Orysa4|Os08g40020.1  
AT4G35130 Orysa4|Os03g04390.1  
AT5G66520  
Orysa4|Os05g45850.1  
AT3G03580  
Orysa4|Os07g05560.1  
AT1G14470  
AT5G50990  
AT3G49140  
Orysa4|Os04g57940.1  
AT1G31430  
AT4G16835 Orysa4|Os08g05750.1  
AT1G13410,AT2G44880  
Orysa4|Os10g23830.1,Orysa4|Os03g49930.1  
AT3G15130 Orysa4|Os04g58980.1  
Orysa4|Os03g08680.1,Orysa4|Os06g48660.1  
AT5G47460  
AT3G58590 Orysa4|Os01g55070.1  
AT3G26540 Orysa4|Os04g35650.1  
AT3G23330 Orysa4|Os07g39090.1  
AT5G08510 Orysa4|Os06g03570.1  
AT1G71420  
AT4G21300 Orysa4|Os03g56850.1  
AT2G22070 Orysa4|Os03g56400.1  
Orysa4|Os07g06960.1  
Orysa4|Os05g25930.1  
Orysa4|Os01g60250.1  
AT5G06540,AT3G22690,AT5G40405  
Orysa4|Os06g29800.1  
AT4G01030 Orysa4|Os05g50950.1

AT3G25970 Orysa4|Os08g28830.1  
Orysa4|Os05g24150.1,Orysa4|Os05g24890.1  
AT3G02010  
AT3G28640,AT3G28660 Orysa4|Os03g06300.1  
Orysa4|Os01g28930.1,Orysa4|Os03g55840.1  
Orysa4|Os01g28570.1  
Orysa4|Os09g24520.1  
AT4G15720 Orysa4|Os12g06650.1  
AT3G04750  
AT1G74600 Orysa4|Os09g24680.1  
AT5G46440,AT5G46460  
AT5G13270  
AT4G14170 Orysa4|Os05g33920.1  
Orysa4|Os12g13110.1  
Orysa4|Os01g55960.1  
AT4G14820 Orysa4|Os04g14450.1  
AT2G42920 Orysa4|Os03g43470.1  
Orysa4|Os11g27250.1  
AT1G68930,AT3G49710  
Orysa4|Os03g49464.1  
AT1G06145  
AT4G08210,AT3G18840 Orysa4|Os02g57340.1  
AT2G40720,AT5G27110  
AT5G43790 Orysa4|Os12g03450.1  
Orysa4|Os11g40760.1  
AT2G36980 Orysa4|Os09g34870.1  
AT3G63370 Orysa4|Os04g39410.1  
AT1G19720 Orysa4|Os03g59264.1  
AT4G25270 Orysa4|Os03g63560.1  
AT3G49740,AT4G31070,AT2G39620 Orysa4|Os02g44970.1,Orysa4|Os01g25530.1  
AT3G53360 Orysa4|Os06g30940.1  
AT3G46790 Orysa4|Os01g62910.1  
Orysa4|Os05g41320.1,Orysa4|Os05g18690.1,Orysa4|Os11g27700.1  
Orysa4|Os11g29180.1,Orysa4|Os01g55390.1  
Orysa4|Os05g22560.1  
Orysa4|Os11g44640.1,Orysa4|Os06g03450.1,Orysa4|Os12g27160.1,Orysa4|Os03g23150.1  
Orysa4|Os02g24150.1  
Orysa4|Os04g14380.1  
Orysa4|Os09g23700.1,Orysa4|Os05g11400.1  
Orysa4|Os10g17070.1  
AT2G07340 Orysa4|Os02g26440.1  
Orysa4|Os05g39640.1  
AT3G26580 Orysa4|Os03g31490.1  
Orysa4|Os02g44690.1  
AT2G23940,AT4G30500  
AT1G33265 Orysa4|Os04g48840.1  
AT1G67460  
AT1G67440 Orysa4|Os04g31270.1  
AT3G62580 Orysa4|Os12g37060.1,Orysa4|Os11g44940.1  
Orysa4|Os12g37080.1  
Orysa4|Os12g37070.1  
AT1G05460 Orysa4|Os03g06440.1  
Orysa4|Os05g06170.1  
AT2G30880 Orysa4|Os07g04550.1,Orysa4|Os03g46340.1  
AT1G66240,AT3G56240 Orysa4|Os08g10480.1  
AT5G66110 Orysa4|Os03g06080.1  
Orysa4|Os06g35060.1  
Orysa4|Os08g40130.1  
Orysa4|Os04g42350.1  
Orysa4|Os10g39210.1  
AT2G18196 Orysa4|Os03g02860.1  
AT1G06330,AT1G29100  
AT4G39700 Orysa4|Os08g31140.1,Orysa4|Os09g20000.1  
AT1G71050,AT1G22990,AT5G17450 Orysa4|Os01g32330.1  
Orysa4|Os03g26650.1  
Orysa4|Os01g55320.1  
AT4G27590 Orysa4|Os04g49260.1  
AT3G48970  
AT4G08570  
Orysa4|Os01g20830.1  
AT4G35060,AT4G38580  
AT4G16330 Orysa4|Os06g06720.1  
Orysa4|Os07g07410.1  
AT3G47190,AT5G58660 Orysa4|Os04g33360.1  
AT2G34555,AT1G30040,AT1G78440 Orysa4|Os05g43880.1,Orysa4|Os01g55240.1,Orysa4|Os05g48700.1  
AT1G05010,AT1G62380,AT1G12010 Orysa4|Os09g27820.1,Orysa4|Os09g27750.1,Orysa4|Os02g53180.1  
Orysa4|Os08g30230.1  
Orysa4|Os02g52840.1  
AT5G63590,AT5G08640,AT5G43935,AT5G63580,AT5G63600,AT5G63595  
AT1G17010,AT1G17020,AT4G25300,AT4G25310,AT1G78550  
AT1G77330 Orysa4|Os05g05670.1,Orysa4|Os05g05680.1,Orysa4|Os11g08380.1  
Orysa4|Os11g03510.1

AT1G44090  
Orysa4|Os01g25010.1,Orysa4|Os01g24980.1,Orysa4|Os03g63900.1,Orysa4|Os10g40900.1,Orysa4|Os10g40880.1,Orysa4|Os10g40990.1,Orysa4|Os10g40934.1,Orysa4|Os09g18520.1,Orysa4|Os09g18470.1,Orysa4|Os09g18450.1,Orysa4|Os03g32470.1,Orysa4|Os10g41020.1  
Orysa4|Os08g30240.1  
AT1G14120,AT1G14130 Orysa4|Os04g39980.1  
AT1G52820,AT4G03070,AT1G52810,AT1G28030,AT1G52790,AT1G52800,AT1G15540,AT1G80320  
Orysa4|Os08g32160.1,Orysa4|Os08g32170.1,Orysa4|Os01g21830.1,Orysa4|Os05g50090.1,Orysa4|Os11g16450.1  
Orysa4|Os09g07450.1  
AT2G19590 Orysa4|Os06g37590.1  
Orysa4|Os04g55070.1  
Orysa4|Os11g25060.1  
Orysa4|Os01g22920.1  
AT3G51240 Orysa4|Os04g56700.1  
AT2G06960,AT2G36690 Orysa4|Os09g39720.1,Orysa4|Os08g44590.1  
AT1G02400,AT1G47990 Orysa4|Os05g06670.1  
AT5G51810,AT4G25420,AT5G07200,AT1G60980 Orysa4|Os07g07420.1,Orysa4|Os03g63970.1  
AT3G60290,AT2G44800,AT5G07480 Orysa4|Os04g57180.1  
Orysa4|Os05g16900.1  
AT5G24530 Orysa4|Os04g49194.1,Orysa4|Os10g39140.1  
Orysa4|Os08g37456.1  
AT4G23340,AT5G51310  
AT4G22870 Orysa4|Os09g18390.1  
AT4G10490,AT4G10500 Orysa4|Os04g49210.1  
AT3G50210,AT3G49620,AT3G49630  
AT4G21200  
AT1G55290,AT3G13610,AT3G12900,AT5G12270  
AT3G21420 Orysa4|Os01g70930.1  
Orysa4|Os09g07020.1  
AT5G05600,AT3G11180,AT3G55970 Orysa4|Os03g18030.1,Orysa4|Os05g03640.1  
Orysa4|Os08g30150.1,Orysa4|Os08g30100.1,Orysa4|Os08g30080.1,Orysa4|Os03g64280.1,Orysa4|Os03g48430.1  
Orysa4|Os11g16460.1  
AT4G22880  
AT1G80340,AT1G15550,AT1G80330,AT4G21690 Orysa4|Os05g08540.1,Orysa4|Os01g08220.1  
AT3G46500,AT3G46480,AT3G46490,AT1G35190 Orysa4|Os01g09300.1  
Orysa4|Os08g30170.1  
Orysa4|Os06g07941.1,Orysa4|Os06g08041.1  
AT5G20550,AT5G20400,AT1G49390,AT5G54000  
Orysa4|Os06g08060.1,Orysa4|Os06g07932.1,Orysa4|Os02g21550.1,Orysa4|Os06g08014.1  
Orysa4|Os05g34854.1,Orysa4|Os01g66100.1  
AT2G38240  
AT4G03060,AT4G03050  
AT1G03400,AT1G03410,AT1G06620,AT3G61400,AT1G06640,AT1G06650,AT2G25450,AT2G30830,AT2G30840,AT5G59540,AT5G59530,AT1G04380,AT1G04350,AT5G43450,AT5G43440 Orysa4|Os04g10350.1  
Orysa4|Os07g01340.1  
AT3G19000,AT3G19010 Orysa4|Os08g15149.1,Orysa4|Os03g42130.1  
AT4G16765,AT4G16770 Orysa4|Os10g37880.1,Orysa4|Os10g37899.1  
Orysa4|Os06g42130.1,Orysa4|Os01g27490.1  
Orysa4|Os04g44150.1,Orysa4|Os02g41954.1  
Orysa4|Os01g35230.1,Orysa4|Os06g14400.1  
Orysa4|Os04g10300.1  
AT1G50960  
Orysa4|Os01g39860.1  
AT1G34350 Orysa4|Os05g35720.1,Orysa4|Os08g01350.1  
AT2G41770,AT3G57420 Orysa4|Os07g46300.1,Orysa4|Os05g32500.1  
AT2G43760 Orysa4|Os02g04740.1  
AT2G01410 Orysa4|Os01g51480.1,Orysa4|Os01g42140.1  
AT5G45990,AT3G13210,AT5G41770,AT3G51110  
Orysa4|Os06g33250.1,Orysa4|Os05g22260.1,Orysa4|Os10g18150.1  
AT5G53530,AT4G27690 Orysa4|Os03g47560.1,Orysa4|Os11g41130.1,Orysa4|Os12g31640.1  
AT2G21870 Orysa4|Os02g03860.1  
AT1G04240,AT5G43700,AT3G23030,AT4G14560  
AT2G01200,AT1G15050 Orysa4|Os11g11420.1,Orysa4|Os11g11430.1  
AT4G14550,AT3G23050,AT1G04250,AT3G04730  
Orysa4|Os03g43400.1,Orysa4|Os12g40890.1,Orysa4|Os03g53150.1  
AT1G51950,AT3G16500,AT5G25890  
Orysa4|Os05g09480.1,Orysa4|Os01g09450.1,Orysa4|Os05g44810.1,Orysa4|Os01g53880.1  
Orysa4|Os07g08460.1,Orysa4|Os03g58350.1,Orysa4|Os09g35870.1  
AT1G04550,AT2G33310,AT4G28640,AT1G04100 Orysa4|Os02g57250.1  
Orysa4|Os05g08570.1,Orysa4|Os01g08320.1,Orysa4|Os06g39590.1  
AT3G17600 Orysa4|Os02g49160.1,Orysa4|Os01g18360.1  
AT1G52830,AT3G15540,AT1G15580  
AT1G80390  
AT3G62100,AT2G46990 Orysa4|Os06g07040.1  
Orysa4|Os02g56120.1  
AT4G29080,AT2G22670,AT5G65670  
Orysa4|Os01g13030.1,Orysa4|Os05g14180.1,Orysa4|Os06g22870.1,Orysa4|Os01g48450.1,Orysa4|Os05g48590.1  
Orysa4|Os06g24850.1,Orysa4|Os08g01780.1,Orysa4|Os11g11410.1  
AT4G32280

AT1G21380,AT1G76970 Orysa4|Os11g09329.1  
 AT5G01760,AT2G38410 Orysa4|Os05g27320.1  
 AT5G63640 Orysa4|Os08g01740.1  
 AT4G32760,AT3G08790 Orysa4|Os01g12880.1,Orysa4|Os02g17350.1  
 Orysa4|Os01g61030.1,Orysa4|Os05g39760.1  
 AT4G08540,AT1G77890 Orysa4|Os07g43322.1  
 AT5G17990 Orysa4|Os03g03450.1  
 AT5G44180 Orysa4|Os05g48820.1,Orysa4|Os01g48180.1  
 Orysa4|Os01g48170.1  
 AT4G12750 Orysa4|Os07g42750.1  
 AT1G28420  
 AT4G19700,AT5G45100,AT3G12920,AT1G79110,AT2G12290 Orysa4|Os03g48870.1  
 AT3G05410 Orysa4|Os01g70820.1  
 AT2G19870  
 Orysa4|Os01g53890.1  
 AT3G62370 Orysa4|Os03g19580.1  
 AT2G15860 Orysa4|Os03g52780.1  
 AT1G58766,AT1G59077,AT1G59453,AT1G17450 Orysa4|Os02g21210.1,Orysa4|Os02g42200.1  
 Orysa4|Os02g21190.1  
 Orysa4|Os01g65500.1  
 AT5G40890,AT3G27170 Orysa4|Os12g25200.1  
 AT5G26240 Orysa4|Os03g48940.1  
 AT5G49890 Orysa4|Os02g35190.1  
 AT5G33280 Orysa4|Os04g55210.1  
 Orysa4|Os08g20570.1  
 AT5G59960 Orysa4|Os01g05830.1  
 AT4G25690,AT4G25670,AT5G52550 Orysa4|Os06g01770.1  
 AT3G10390 Orysa4|Os04g47270.1  
 Orysa4|Os02g51880.1  
 AT4G29720  
 AT1G62830  
 AT3G13682 Orysa4|Os08g04780.1  
 AT4G16310  
 AT5G08120 Orysa4|Os09g29970.1,Orysa4|Os06g17440.1  
 AT1G74270,AT1G07070,AT1G41880,AT3G55750  
 Orysa4|Os05g48310.1,Orysa4|Os05g48220.1,Orysa4|Os02g54470.1  
 AT3G09050 Orysa4|Os01g63410.1  
 Orysa4|Os05g37780.1  
 AT3G48480 Orysa4|Os11g10780.1  
 AT3G55005,AT3G55000  
 Orysa4|Os11g01170.1  
 AT4G11400,AT2G46040 Orysa4|Os01g63354.1  
 AT2G17130  
 AT1G32480  
 AT3G09810,AT5G03290  
 AT4G35650 Orysa4|Os04g40310.1  
 AT4G35260  
 AT5G52980 Orysa4|Os02g13200.1  
 AT5G66420 Orysa4|Os06g27800.1  
 AT1G11930 Orysa4|Os05g05740.1  
 AT4G26860  
 AT4G28180 Orysa4|Os01g57150.1  
 AT4G01860 Orysa4|Os03g02110.1  
 AT2G21690  
 Orysa4|Os07g39560.1  
 AT2G33410,AT4G14300 Orysa4|Os10g33230.1  
 AT5G47620  
 AT2G37510 Orysa4|Os03g17060.1  
 AT4G36960 Orysa4|Os01g71770.1  
 AT1G17640 Orysa4|Os06g37000.1,Orysa4|Os02g12850.1  
 AT5G54580 Orysa4|Os07g36490.1,Orysa4|Os08g04440.1  
 AT1G18630  
 AT3G26420 Orysa4|Os03g61990.1  
 AT5G62110  
 Orysa4|Os07g41120.1  
 Orysa4|Os11g41890.1  
 AT5G06210 Orysa4|Os04g33810.1  
 Orysa4|Os03g56020.1  
 AT2G16260  
 Orysa4|Os04g49440.1  
 Orysa4|Os01g56120.1,Orysa4|Os01g56110.1  
 AT4G13860  
 AT1G73530  
 Orysa4|Os08g38410.1  
 AT3G13224 Orysa4|Os08g23120.1  
 AT3G07810  
 AT5G55550,AT4G26650  
 AT3G08000  
 AT5G04280,AT1G60650 Orysa4|Os03g47800.1,Orysa4|Os07g08960.1  
 AT1G58470 Orysa4|Os07g03240.1  
 AT2G27330  
 AT4G13850,AT3G23830 Orysa4|Os01g68790.1

AT1G19980 Orysa4|Os04g02680.1  
AT4G22410,AT4G22350 Orysa4|Os09g24250.1  
AT3G44330 Orysa4|Os08g01180.1  
Orysa4|Os08g45200.1  
AT1G10385 Orysa4|Os07g10110.1  
AT5G49830 Orysa4|Os07g38060.1  
AT1G10180 Orysa4|Os01g61580.1,Orysa4|Os05g39110.1  
AT5G58640,AT3G47300 Orysa4|Os10g34130.1,Orysa4|Os10g34150.1  
Orysa4|Os10g34040.1  
AT5G25260,AT5G25250,AT5G64870 Orysa4|Os10g34040.1  
AT1G32060 Orysa4|Os02g47020.1  
AT4G26990,AT5G54920 Orysa4|Os04g53450.1  
Orysa4|Os04g43280.1  
Orysa4|Os10g33250.1,Orysa4|Os02g40784.1  
Orysa4|Os02g56920.1  
Orysa4|Os02g29600.1  
AT1G02190,AT2G37700  
AT1G02205 Orysa4|Os02g08230.1,Orysa4|Os09g25850.1  
AT5G57800 Orysa4|Os01g54040.1,Orysa4|Os05g44590.1  
AT2G25740 Orysa4|Os03g58620.1  
AT2G02590 Orysa4|Os03g22610.1,Orysa4|Os05g51800.1  
AT5G19830 Orysa4|Os05g47630.1,Orysa4|Os01g49900.1  
AT1G18440 Orysa4|Os01g04130.1  
AT5G16140,AT5G38290 Orysa4|Os01g04130.1  
AT1G05870,AT2G31560,AT2G43340 Orysa4|Os11g17930.1  
Orysa4|Os05g03130.1  
Orysa4|Os05g04700.1  
AT3G05880,AT3G05890 Orysa4|Os07g44180.1  
AT1G57550 Orysa4|Os03g17790.1  
Orysa4|Os03g25460.1  
AT2G38905 Orysa4|Os05g51450.1  
AT4G30660,AT2G24040,AT4G28088,AT4G30650  
AT1G09130  
AT1G49970 Orysa4|Os05g51450.1  
AT5G40670 Orysa4|Os12g18110.1  
AT4G32360 Orysa4|Os02g17700.1  
AT2G38700,AT3G54250 Orysa4|Os02g01760.1,Orysa4|Os02g01920.1  
AT1G16320,AT1G79510 Orysa4|Os04g52330.1  
AT2G46220 Orysa4|Os01g12200.1  
Orysa4|Os09g19560.1  
AT3G20020  
AT4G29510,AT2G19670  
AT1G04870 Orysa4|Os04g58060.1  
AT3G12270 Orysa4|Os07g44640.1  
AT2G39090 Orysa4|Os05g05720.1  
Orysa4|Os05g29800.1  
AT5G54180 Orysa4|Os12g01980.1  
AT4G02990 Orysa4|Os09g26890.1,Orysa4|Os05g33500.1  
AT4G38160 Orysa4|Os08g40430.1  
AT2G44020 Orysa4|Os02g54200.1  
AT4G14605 Orysa4|Os02g39040.1  
AT1G78170,AT1G22250,AT4G08910 Orysa4|Os03g09120.1  
AT5G55000 Orysa4|Os03g06160.1,Orysa4|Os10g30190.1  
AT5G06660,AT3G12030 Orysa4|Os03g51160.1  
AT1G03160 Orysa4|Os05g32390.1  
AT1G09010 Orysa4|Os05g32530.1  
AT2G38860,AT3G54600 Orysa4|Os11g37920.1  
AT3G02720 Orysa4|Os04g57590.1  
AT5G11260 Orysa4|Os02g10860.1  
AT3G17609 Orysa4|Os01g07880.1  
Orysa4|Os06g39960.1  
AT3G13490 Orysa4|Os02g41470.1  
AT3G11710 Orysa4|Os03g38980.1  
AT1G02860 Orysa4|Os07g47590.1  
AT2G38920 Orysa4|Os03g44810.1  
AT5G11490 Orysa4|Os01g43630.1  
AT4G11380,AT4G23460 Orysa4|Os03g23950.1  
Orysa4|Os02g21009.1  
AT5G01490 Orysa4|Os05g51610.1,Orysa4|Os01g37690.1  
AT2G38170,AT3G51860 Orysa4|Os05g51610.1,Orysa4|Os01g37690.1  
AT1G55730,AT1G55720,AT3G13320 Orysa4|Os04g55940.1,Orysa4|Os03g27960.1  
Orysa4|Os02g04630.1  
AT1G55910 Orysa4|Os03g29850.1  
Orysa4|Os08g42150.1,Orysa4|Os01g74110.1  
AT5G59520

AT3G02370,AT3G57360 Orysa4|Os09g32700.1  
AT4G30300,AT4G19210,AT3G13640 Orysa4|Os02g18180.1  
AT3G20800,AT5G12980  
AT2G32550  
Orysa4|Os02g19660.1,Orysa4|Os02g19880.1  
Orysa4|Os02g19420.1  
Orysa4|Os04g52340.1,Orysa4|Os07g37790.1,Orysa4|Os03g57130.1  
AT1G22980,AT1G22970,AT1G71150 Orysa4|Os05g48070.1  
AT4G33010,AT2G26080 Orysa4|Os06g40940.1,Orysa4|Os01g51410.1  
Orysa4|Os06g14170.1,Orysa4|Os05g04120.1  
AT5G26820 Orysa4|Os12g37530.1  
Orysa4|Os06g01690.1  
AT5G24020  
AT1G10150,AT1G59510,AT3G49790 Orysa4|Os10g01290.1,Orysa4|Os07g03190.1  
AT1G64970 Orysa4|Os02g47310.1  
Orysa4|Os01g46970.1,Orysa4|Os05g49420.1  
Orysa4|Os03g59460.1,Orysa4|Os07g10890.1  
AT1G32150,AT2G35530 Orysa4|Os02g03580.1,Orysa4|Os12g13170.1  
Orysa4|Os03g13614.1  
AT2G46270,AT4G01120  
AT4G36730  
AT3G44530 Orysa4|Os09g39420.1  
Orysa4|Os01g67080.1,Orysa4|Os02g42580.1  
AT1G15130 Orysa4|Os10g35250.1  
AT4G19985 Orysa4|Os05g44020.1  
AT3G13200 Orysa4|Os06g01700.1  
AT1G09230 Orysa4|Os03g21020.1  
AT2G36885 Orysa4|Os03g04470.1  
AT1G22060 Orysa4|Os10g21940.1  
Orysa4|Os04g52850.1  
AT3G62940  
AT2G17300,AT4G35320 Orysa4|Os08g40060.1  
AT4G29890 Orysa4|Os06g48510.1  
AT3G46560 Orysa4|Os05g02050.1,Orysa4|Os12g38310.1  
AT5G02120 Orysa4|Os12g29570.1,Orysa4|Os05g22730.1  
AT3G46310,AT3G46300,AT5G02640 Orysa4|Os05g02900.1  
AT4G21780 Orysa4|Os03g36960.1  
AT1G21610,AT1G77310  
Orysa4|Os05g34900.1  
Orysa4|Os01g66050.1  
AT5G03406,AT3G46100  
Orysa4|Os02g51830.1  
AT3G46970  
AT3G29320 Orysa4|Os03g55090.1  
Orysa4|Os01g06450.1,Orysa4|Os07g49370.1  
Orysa4|Os04g01280.1,Orysa4|Os10g13810.1  
AT1G27600  
Orysa4|Os01g48440.1  
AT2G37090 Orysa4|Os05g03174.1,Orysa4|Os03g17850.1  
AT1G23010,AT1G71040  
Orysa4|Os01g03640.1,Orysa4|Os01g03630.1,Orysa4|Os01g03620.1,Orysa4|Os01g03530.1,Orysa4|Os01  
g03549.1  
AT2G19270 Orysa4|Os02g07920.1  
AT3G06850  
AT3G13930,AT1G54220 Orysa4|Os02g01500.1,Orysa4|Os07g22720.1,Orysa4|Os06g01630.1  
AT3G52200 Orysa4|Os06g30460.1  
AT3G11620 Orysa4|Os01g72870.1  
AT3G56820 Orysa4|Os01g59520.1  
Orysa4|Os09g25860.1  
AT4G36630 Orysa4|Os03g50740.1  
Orysa4|Os03g20650.1,Orysa4|Os07g48660.1  
Orysa4|Os01g64730.1,Orysa4|Os05g36160.1,Orysa4|Os08g43600.1  
AT3G44460  
AT2G41070,AT3G56850 Orysa4|Os05g41070.1  
AT1G21150,AT5G07900,AT1G79220,AT5G64950  
Orysa4|Os02g51460.1,Orysa4|Os02g51450.1,Orysa4|Os05g33460.1,Orysa4|Os05g33440.1,Orysa4|Os05  
g34160.1,Orysa4|Os04g54510.1,Orysa4|Os07g24090.1  
AT1G51420,AT2G35840,AT3G52340 Orysa4|Os02g05030.1,Orysa4|Os01g27880.1,Orysa4|Os05g05270.1  
AT3G54270  
Orysa4|Os05g02010.1  
AT5G59400  
Orysa4|Os04g31950.1  
AT3G59810,AT2G43810  
Orysa4|Os07g03230.1,Orysa4|Os02g03080.1  
AT3G56150,AT3G22860  
AT2G42380,AT3G58120 Orysa4|Os01g11350.1  
Orysa4|Os01g55150.1  
AT4G08960 Orysa4|Os06g11640.1  
AT5G11430,AT5G25520,AT2G25640 Orysa4|Os06g39480.1,Orysa4|Os02g11780.1  
Orysa4|Os04g55190.1  
AT1G67310 Orysa4|Os04g31900.1  
AT4G16150,AT3G16940

AT5G09410,AT5G64220  
Orysa4|Os01g69910.1  
AT2G22300 Orysa4|Os10g22950.1,Orysa4|Os03g09100.1,Orysa4|Os03g27080.1,Orysa4|Os07g43030.1  
AT5G62680,AT3G47960,AT1G18880 Orysa4|Os03g48180.1  
Orysa4|Os08g41600.1  
AT5G13400 Orysa4|Os01g01360.1  
Orysa4|Os07g26450.1  
Orysa4|Os10g42870.1,Orysa4|Os10g42900.1,Orysa4|Os04g50950.1,Orysa4|Os04g50940.1,Orysa4|Os02  
g47090.1,Orysa4|Os07g41250.1,Orysa4|Os12g13790.1,Orysa4|Os04g50930.1  
Orysa4|Os10g40600.1,Orysa4|Os03g01290.1  
Orysa4|Os12g05030.1  
AT2G37900,AT3G53960 Orysa4|Os03g60850.1  
AT2G02020,AT1G62200,AT2G02040  
Orysa4|Os03g13274.1  
Orysa4|Os12g15600.1,Orysa4|Os11g18100.1  
Orysa4|Os03g17770.1  
AT5G11570  
AT5G46050,AT5G46040  
Orysa4|Os10g33210.1  
AT3G54450  
Orysa4|Os08g31960.1,Orysa4|Os04g34640.1  
AT1G52190,AT3G16180 Orysa4|Os01g55610.1  
AT1G27080,AT1G69870,AT1G69860 Orysa4|Os04g56560.1,Orysa4|Os01g68510.1  
Orysa4|Os01g65130.1  
AT1G22540,AT1G72140,AT1G72130,AT1G22550,AT1G22570,AT1G72120  
Orysa4|Os05g35650.1,Orysa4|Os05g35594.1,Orysa4|Os01g65110.1,Orysa4|Os01g65100.1,Orysa4|Os08  
g41590.1,Orysa4|Os04g59480.1  
Orysa4|Os11g18110.1,Orysa4|Os11g18044.1,Orysa4|Os11g17970.1,Orysa4|Os12g12934.1,Orysa4|Os04  
g41450.1,Orysa4|Os04g41400.1,Orysa4|Os04g41410.1  
Orysa4|Os08g05910.1  
Orysa4|Os01g65210.1  
AT3G21670 Orysa4|Os04g39030.1,Orysa4|Os02g37040.1  
Orysa4|Os10g22560.1,Orysa4|Os10g02220.1,Orysa4|Os10g02210.1,Orysa4|Os10g02260.1,Orysa4|Os10  
g02240.1,Orysa4|Os10g02340.1  
Orysa4|Os06g49230.1  
AT1G32450,AT4G21680 Orysa4|Os02g46460.1  
AT2G40460 Orysa4|Os05g27010.1  
AT5G28470  
Orysa4|Os03g51050.1  
Orysa4|Os02g31980.1,Orysa4|Os02g52060.1,Orysa4|Os10g02230.1,Orysa4|Os01g28980.1  
Orysa4|Os01g65150.1,Orysa4|Os01g65169.1,Orysa4|Os01g65190.1,Orysa4|Os01g65140.1,Orysa4|Os01  
g65120.1  
Orysa4|Os11g23890.1,Orysa4|Os01g55600.1  
AT1G59740,AT1G33440 Orysa4|Os11g12740.1,Orysa4|Os04g36040.1  
AT3G01350,AT5G14940 Orysa4|Os06g13200.1,Orysa4|Os06g13210.1  
Orysa4|Os10g33170.1,Orysa4|Os03g04570.1  
Orysa4|Os05g34000.1,Orysa4|Os05g33960.1,Orysa4|Os05g34030.1,Orysa4|Os05g34010.1  
AT3G45710,AT3G45700,AT3G45690,AT3G45680,AT3G45720,AT3G45660,AT3G45650 Orysa4|Os05g27304.1  
Orysa4|Os01g67640.1,Orysa4|Os01g67630.1  
Orysa4|Os05g27050.1  
Orysa4|Os07g21960.1  
AT5G19640 Orysa4|Os02g48570.1  
AT3G25280,AT3G25260  
Orysa4|Os03g13250.1,Orysa4|Os03g13240.1  
AT1G69850,AT1G27040,AT5G62730 Orysa4|Os06g38294.1  
Orysa4|Os05g35670.1,Orysa4|Os09g16150.1  
AT1G12110  
AT3G54140,AT5G01180 Orysa4|Os07g01070.1,Orysa4|Os01g04950.1  
Orysa4|Os06g19560.1  
Orysa4|Os06g49250.1,Orysa4|Os06g49220.1,Orysa4|Os06g49240.1,Orysa4|Os10g02100.1,Orysa4|Os10  
g02080.1  
AT1G68570 Orysa4|Os06g15370.1  
AT2G38100  
Orysa4|Os01g65200.1  
AT2G26690 Orysa4|Os01g37590.1  
AT5G61330 Orysa4|Os01g34200.1  
Orysa4|Os06g42810.1  
AT3G21660  
AT4G15410,AT4G22150,AT4G04210 Orysa4|Os04g39040.1  
AT2G13290 Orysa4|Os12g41780.1  
AT3G01620,AT5G14480,AT3G27540,AT3G26445,AT1G12990,AT1G67880  
Orysa4|Os02g38140.1,Orysa4|Os02g38160.1,Orysa4|Os04g40150.1  
Orysa4|Os09g39490.1  
AT2G13570  
AT5G47640  
Orysa4|Os05g49780.1,Orysa4|Os01g61810.1  
Orysa4|Os08g07740.1  
AT1G09030,AT2G47810  
Orysa4|Os01g70890.1  
Orysa4|Os07g41580.1  
AT2G38880,AT3G53340,AT2G37060 Orysa4|Os05g38820.1  
Orysa4|Os01g70880.1

Orysa4|Os06g17480.1  
Orysa4|Os02g49410.1  
AT5G47670,AT1G21970 Orysa4|Os02g49370.1  
AT4G14540  
AT5G17280 Orysa4|Os09g36120.1  
Orysa4|Os07g05360.1  
AT1G79040 Orysa4|Os08g10020.1  
AT3G43930,AT2G26270 Orysa4|Os09g26870.1  
AT2G44160,AT3G59970 Orysa4|Os03g60090.1  
AT5G65280  
AT2G20770,AT1G52920 Orysa4|Os10g35480.1  
AT1G71920,AT5G10330 Orysa4|Os02g47940.1  
AT5G24330 Orysa4|Os02g03030.1  
AT5G09790 Orysa4|Os01g73460.1  
AT5G59990  
AT3G12890 Orysa4|Os10g32900.1,Orysa4|Os03g04620.1  
Orysa4|Os01g61900.1,Orysa4|Os05g38990.1,Orysa4|Os12g01080.1,Orysa4|Os12g16160.1  
AT1G26110,Orysa4|Os01g02090.1,Orysa4|Os06g30060.1  
AT5G45330,AT4G19360  
AT2G31300,AT2G30910 Orysa4|Os02g57220.1  
Orysa4|Os04g52570.1,Orysa4|Os03g45760.1  
AT1G16520,AT1G56080  
AT4G15545  
AT5G13680 Orysa4|Os07g37640.1  
AT3G01510 Orysa4|Os08g29160.1  
AT2G34260 Orysa4|Os07g46620.1  
AT2G45860 Orysa4|Os02g57830.1  
AT5G02970,AT3G09690 Orysa4|Os12g34990.1,Orysa4|Os03g17900.1  
AT3G28917  
AT1G14687,AT5G42780  
AT5G39760,AT3G28920,AT5G15210,AT5G60480,AT1G69600  
Orysa4|Os04g35500.1  
Orysa4|Os06g23030.1,Orysa4|Os08g34010.1  
AT2G02540,AT1G14440 Orysa4|Os11g13930.1  
AT1G75240,AT2G18350 Orysa4|Os03g50920.1  
Orysa4|Os09g24810.1  
AT3G50890  
AT1G74660  
AT4G24660  
Orysa4|Os01g44430.1,Orysa4|Os05g50310.1  
Orysa4|Os02g47770.1  
AT5G65410 Orysa4|Os08g37400.1,Orysa4|Os09g29130.1  
Orysa4|Os12g03110.1  
AT3G62630 Orysa4|Os03g19090.1,Orysa4|Os11g44920.1  
Orysa4|Os06g42690.1,Orysa4|Os02g09830.1,Orysa4|Os12g43790.1  
AT5G08141,AT5G60830,AT1G59530,AT5G38800,AT3G30530,AT5G15830,AT2G04038,AT1G13600,AT1G68880  
Orysa4|Os09g29820.1,Orysa4|Os08g38020.1  
AT5G27150,AT3G05030,AT3G06370 Orysa4|Os05g05590.1  
AT5G55470 Orysa4|Os06g21360.1  
AT3G21720 Orysa4|Os07g34520.1  
AT1G32550 Orysa4|Os03g48040.1  
AT1G08540 Orysa4|Os11g26160.1  
AT3G53920 Orysa4|Os05g51150.1  
AT2G36990 Orysa4|Os08g14450.1  
AT5G13730  
AT1G64860 Orysa4|Os08g06630.1  
AT1G26460 Orysa4|Os07g40800.1  
AT2G04660 Orysa4|Os04g40830.1  
Orysa4|Os03g62640.1  
AT5G17440,AT3G03340 Orysa4|Os02g39300.1  
AT5G13780 Orysa4|Os04g54330.1  
AT1G78915 Orysa4|Os07g18720.1  
AT2G41460 Orysa4|Os01g58680.1,Orysa4|Os01g58690.1  
AT3G21650,AT4G15415  
AT5G03470,AT3G09880,AT3G54930  
AT3G26030  
AT5G25510 Orysa4|Os05g48150.1  
Orysa4|Os05g27800.1,Orysa4|Os01g08310.1,Orysa4|Os05g08560.1  
Orysa4|Os10g39414.1,Orysa4|Os09g37060.1  
AT1G13460,AT3G26020 Orysa4|Os08g02860.1  
Orysa4|Os07g17360.1,Orysa4|Os03g62730.1  
Orysa4|Os04g40860.1  
AT1G07970 Orysa4|Os03g17950.1  
Orysa4|Os11g06590.1,Orysa4|Os12g01160.1  
AT3G45770  
AT4G08810 Orysa4|Os07g43990.1  
AT2G04280,AT4G12700 Orysa4|Os10g31810.1  
Orysa4|Os01g59070.1  
AT5G45310 Orysa4|Os01g73110.1  
Orysa4|Os06g20340.1,Orysa4|Os02g48840.1  
AT2G04550  
AT1G14450,AT2G02510 Orysa4|Os02g35610.1



AT2G35900 Orysa4|Os01g56470.1  
AT2G44360 Orysa4|Os09g38080.1  
AT1G24240,AT4G11630,AT5G11750  
Orysa4|Os02g11030.1  
AT5G47190,AT4G17560 Orysa4|Os02g43600.1  
AT4G02560 Orysa4|Os01g70810.1  
AT1G27385  
Orysa4|Os04g31690.1  
AT4G12970 Orysa4|Os08g41360.1,Orysa4|Os01g68598.1  
AT4G13550 Orysa4|Os04g43030.1  
Orysa4|Os03g50530.1  
AT2G01755  
Orysa4|Os12g21789.1  
AT5G67540,AT3G49880 Orysa4|Os01g65720.1  
AT3G63290 Orysa4|Os10g14180.1  
AT4G14210 Orysa4|Os03g08570.1  
AT1G72560 Orysa4|Os07g42180.1  
AT1G61580,AT1G43170 Orysa4|Os11g06750.1,Orysa4|Os12g07010.1  
AT5G22920 Orysa4|Os03g05270.1,Orysa4|Os10g31850.1  
AT3G62970  
AT5G18650 Orysa4|Os03g22680.1  
Orysa4|Os12g35320.1  
Orysa4|Os01g52110.1  
AT5G25560  
Orysa4|Os12g01830.1,Orysa4|Os11g01830.1,Orysa4|Os12g15190.1,Orysa4|Os12g15314.1  
AT2G40410,AT3G56170 Orysa4|Os01g07200.1,Orysa4|Os01g07212.1  
AT1G10510 Orysa4|Os03g27430.1  
Orysa4|Os06g13050.1  
AT1G22130,AT1G77980,AT1G77950  
AT2G03060  
AT1G18750  
AT1G69540  
Orysa4|Os06g11970.1,Orysa4|Os08g38590.1  
Orysa4|Os11g43740.1  
AT1G18480 Orysa4|Os11g15570.1  
AT3G52155 Orysa4|Os09g11510.1  
AT3G50810,AT4G37235  
AT1G49405 Orysa4|Os03g55870.1  
AT3G23200,AT3G53850,AT5G02060  
AT2G28370 Orysa4|Os03g10870.1,Orysa4|Os10g20250.1  
AT2G37200  
AT1G18680 Orysa4|Os10g18890.1  
AT3G47490  
Orysa4|Os03g07370.1  
AT5G09210,AT5G08550  
Orysa4|Os03g63670.1  
AT3G28030 Orysa4|Os03g10780.1  
Orysa4|Os04g14710.1,Orysa4|Os04g14690.1,Orysa4|Os09g37650.1,Orysa4|Os06g10170.1,Orysa4|Os06g10190.1,Orysa4|Os09g37690.1,Orysa4|Os06g10180.1,Orysa4|Os09g37620.1  
AT1G19250,AT5G45180 Orysa4|Os03g08410.1  
AT5G52910 Orysa4|Os05g11980.1  
Orysa4|Os04g11130.1  
Orysa4|Os02g07600.1  
AT2G02120,AT2G02100,AT2G02130,AT1G61070,AT2G02140,AT2G31957,AT2G31953,AT5G63660  
Orysa4|Os03g03810.1  
AT2G02147 Orysa4|Os01g70680.1  
AT5G07550,AT5G07560,AT5G07520,AT5G07510,AT5G07600  
Orysa4|Os06g27910.1  
AT1G48990,AT3G18570 Orysa4|Os01g45624.1,Orysa4|Os05g50110.1  
AT5G51210,AT4G25140,AT2G25890 Orysa4|Os09g15520.1,Orysa4|Os04g46200.1  
AT5G61610  
AT3G27660,AT5G40420,AT3G01570  
AT3G48150 Orysa4|Os06g46540.1,Orysa4|Os02g43920.1  
AT1G69260,AT1G13740,AT3G29575,AT3G02140 Orysa4|Os07g41160.1,Orysa4|Os03g30570.1  
AT1G77730  
Orysa4|Os03g49770.1  
AT2G31035,AT2G31030  
AT4G08180  
AT4G22540,AT4G12460 Orysa4|Os08g05870.1,Orysa4|Os10g40590.1  
AT1G13170 Orysa4|Os12g18770.1  
AT2G31020  
AT3G25990,AT1G13450 Orysa4|Os04g40930.1  
AT4G38790,AT2G21190 Orysa4|Os08g43470.1,Orysa4|Os09g36370.1  
AT1G19970,AT1G75760  
AT3G25160  
Orysa4|Os10g30980.1  
AT2G21960  
Orysa4|Os04g54640.1  
AT4G20260,AT5G44610 Orysa4|Os02g18410.1,Orysa4|Os01g13210.1  
AT1G37010,AT5G06680 Orysa4|Os09g27370.1  
AT2G26200 Orysa4|Os03g04940.1  
Orysa4|Os07g37310.1

AT5G54240,AT4G27350  
Orysa4|Os01g22600.1  
AT5G26200,AT1G72820 Orysa4|Os03g07890.1,Orysa4|Os10g25830.1,Orysa4|Os09g27240.1  
AT5G15640 Orysa4|Os03g54760.1  
AT4G33550 Orysa4|Os10g05720.1  
AT4G30880 Orysa4|Os03g25350.1,Orysa4|Os01g58660.1,Orysa4|Os01g58650.1  
AT1G61010 Orysa4|Os03g63590.1  
AT2G01730  
Orysa4|Os09g23380.1  
AT3G63170  
Orysa4|Os07g38390.1  
AT2G26310 Orysa4|Os06g10210.1,Orysa4|Os02g53810.1  
AT1G28320 Orysa4|Os12g41430.1,Orysa4|Os05g41810.1  
AT2G21550,AT4G34570,AT2G16370 Orysa4|Os12g26060.1,Orysa4|Os11g29390.1  
AT1G48690 Orysa4|Os11g32510.1  
AT4G27260,AT5G54510 Orysa4|Os05g42150.1,Orysa4|Os01g57610.1  
AT1G28130 Orysa4|Os11g32520.1,Orysa4|Os06g30440.1  
AT5G13320,AT1G23160,AT1G48670,AT1G48660,AT5G51470  
AT5G13360,AT5G13370,AT5G13380,AT5G13350  
AT4G03400  
AT2G46370 Orysa4|Os05g50890.1  
Orysa4|Os11g08340.1,Orysa4|Os01g12160.1  
AT2G47750 Orysa4|Os07g47490.1  
Orysa4|Os05g05180.1  
AT2G14960,AT1G59500,AT4G37390,AT2G23170  
Orysa4|Os07g38860.1,Orysa4|Os07g38890.1,Orysa4|Os07g40290.1  
Orysa4|Os11g34660.1,Orysa4|Os06g47200.1  
AT1G73560,AT1G18280,AT1G73550,AT4G12360,AT1G62790 Orysa4|Os06g49770.1  
AT1G04450,AT2G33460  
Orysa4|Os02g06660.1,Orysa4|Os06g46754.1,Orysa4|Os04g53580.1,Orysa4|Os02g56580.1  
AT3G23380 Orysa4|Os07g26480.1  
AT1G03982,AT2G20430,AT4G28556,AT4G04900  
AT5G62760 Orysa4|Os02g12360.1  
AT1G21500 Orysa4|Os09g34140.1  
AT4G31210 Orysa4|Os02g27440.1,Orysa4|Os06g16980.1  
AT3G22590 Orysa4|Os03g46190.1  
AT2G42180,AT3G57950,AT5G06790 Orysa4|Os09g10730.1  
AT1G27850 Orysa4|Os12g13660.1,Orysa4|Os12g13670.1  
AT4G16810  
AT2G35670  
AT5G51230 Orysa4|Os04g08034.1,Orysa4|Os09g13630.1  
Orysa4|Os11g14390.1  
AT4G16845  
AT3G13230 Orysa4|Os03g02420.1,Orysa4|Os01g57910.1  
AT2G27350 Orysa4|Os04g33780.1  
AT5G48170 Orysa4|Os03g10040.1  
AT2G31090 Orysa4|Os05g11900.1,Orysa4|Os01g11600.1  
AT1G16500,AT1G79160 Orysa4|Os03g45870.1,Orysa4|Os04g52700.1  
AT2G40120 Orysa4|Os05g39080.1,Orysa4|Os01g61620.1  
AT3G17750  
AT1G73460,AT1G73450  
Orysa4|Os03g51020.1  
AT1G79120 Orysa4|Os03g46460.1  
AT4G28160,AT2G20870 Orysa4|Os07g37850.1  
AT1G60730,AT1G60690,AT1G60710,AT1G60680,AT1G10810  
Orysa4|Os04g26920.1,Orysa4|Os04g26900.1,Orysa4|Os04g26910.1,Orysa4|Os04g26870.1,Orysa4|Os04  
g27060.1  
Orysa4|Os04g27300.1  
Orysa4|Os04g26890.1  
Orysa4|Os10g28320.1,Orysa4|Os01g43090.1  
AT4G29520 Orysa4|Os06g05740.1  
Orysa4|Os03g12820.1  
Orysa4|Os06g13860.1,Orysa4|Os04g57640.1  
AT1G32230,AT2G35510 Orysa4|Os03g63770.1,Orysa4|Os10g42710.1  
AT3G47720,AT5G62520,AT1G70440,AT1G23550  
AT3G02555,AT5G16110,AT1G68490,AT1G13390 Orysa4|Os12g40840.1  
Orysa4|Os05g01210.1  
Orysa4|Os05g34810.1  
AT1G02816,AT4G02370,AT1G02813,AT4G02360 Orysa4|Os05g29900.1,Orysa4|Os05g29920.1  
Orysa4|Os04g36600.1,Orysa4|Os11g13770.1,Orysa4|Os11g13720.1,Orysa4|Os12g09620.1,Orysa4|Os03  
g27570.1,Orysa4|Os03g27580.1  
AT5G19590 Orysa4|Os01g41220.1  
AT1G25500 Orysa4|Os02g36960.1  
AT4G02600 Orysa4|Os01g66510.1  
Orysa4|Os02g35490.1  
Orysa4|Os05g09050.1  
AT1G42560,AT2G33670 Orysa4|Os10g39520.1  
Orysa4|Os06g29110.1,Orysa4|Os03g03700.1  
AT2G44110  
AT4G24250  
AT2G17480,AT5G65970,AT2G17430  
Orysa4|Os01g24760.1,Orysa4|Os04g36680.1

AT1G11000  
AT1G11310,AT1G61560,AT2G39200,AT3G45290  
Orysa4|Os04g58420.1  
AT5G53760,AT1G26700  
AT3G25130 Orysa4|Os11g26990.1  
AT5G51680 Orysa4|Os03g03580.1  
AT3G06690,AT1G06290,AT1G06310 Orysa4|Os06g24704.1  
AT5G65110Orysa4|Os11g39220.1  
AT2G44930,AT2G28580,AT3G60470,AT1G65985,AT1G67150  
AT3G50140,AT3G50190,AT3G50130,AT3G50120,AT3G50170,AT3G50160,AT3G50150,AT3G50180  
AT5G11290  
Orysa4|Os11g33430.1,Orysa4|Os11g33394.1  
Orysa4|Os11g33970.1  
Orysa4|Os01g21670.1,Orysa4|Os01g21650.1,Orysa4|Os01g21710.1,Orysa4|Os05g15230.1,Orysa4|Os01g38120.1,Orysa4|Os01g38190.1,Orysa4|Os02g15500.1,Orysa4|Os03g19700.1,Orysa4|Os08g42570.1,Orysa4|Os12g32880.1,Orysa4|Os12g32920.1,Orysa4|Os05g03972.1,Orysa4|Os01g19610.1,Orysa4|Os05g04060.1,Orysa4|Os01g38430.1  
Orysa4|Os06g35860.1  
Orysa4|Os11g33942.1,Orysa4|Os01g38090.1  
Orysa4|Os04g42650.1  
Orysa4|Os01g38380.1  
Orysa4|Os11g33950.1  
Orysa4|Os09g08160.1,Orysa4|Os09g09550.1  
AT3G50200 Orysa4|Os06g08760.1  
AT5G22560,AT5G22550,AT5G22540,AT3G44700,AT3G44710,AT3G47200,AT3G47250,AT3G47210,AT2G36430  
Orysa4|Os05g10920.1  
Orysa4|Os09g13250.1  
Orysa4|Os11g33450.1  
Orysa4|Os04g55390.1,Orysa4|Os05g10900.1,Orysa4|Os01g33740.1,Orysa4|Os09g12840.1,Orysa4|Os10g31240.1,Orysa4|Os10g31080.1,Orysa4|Os10g31170.1,Orysa4|Os09g13040.1,Orysa4|Os09g12970.1,Orysa4|Os09g13470.1,Orysa4|Os08g26840.1,Orysa4|Os08g26850.1,Orysa4|Os08g26820.1,Orysa4|Os08g26710.1,Orysa4|Os08g26220.1,Orysa4|Os08g30520.1,Orysa4|Os03g06730.1,Orysa4|Os06g33350.1  
Orysa4|Os12g29650.1,Orysa4|Os11g34090.1,Orysa4|Os08g25030.1  
AT4G31980  
AT1G74520 Orysa4|Os06g12220.1,Orysa4|Os02g51290.1,Orysa4|Os11g38920.1  
AT4G36720  
AT5G62490,AT1G69700  
Orysa4|Os09g27730.1,Orysa4|Os08g36440.1  
AT5G50720,AT4G24960 Orysa4|Os11g30500.1  
AT2G42820 Orysa4|Os01g52780.1  
Orysa4|Os09g38030.1,Orysa4|Os02g02560.1  
Orysa4|Os01g15910.1  
AT5G17310,AT3G03250  
Orysa4|Os03g63420.1  
AT3G54900  
Orysa4|Os01g07950.1,Orysa4|Os01g34620.1  
AT3G15660  
AT4G32580,AT4G04950 Orysa4|Os10g35720.1  
AT2G38270 Orysa4|Os12g07650.1  
Orysa4|Os12g25500.1,Orysa4|Os12g31650.1,Orysa4|Os07g44990.1,Orysa4|Os10g19080.1,Orysa4|Os02g43060.1,Orysa4|Os11g10230.1,Orysa4|Os03g58730.1,Orysa4|Os01g09206.1,Orysa4|Os06g16930.1,Orysa4|Os03g16640.1,Orysa4|Os06g30150.1,Orysa4|Os01g03200.1,Orysa4|Os04g29780.1,Orysa4|Os11g09390.1,Orysa4|Os05g02430.1,Orysa4|Os07g45770.1,Orysa4|Os11g35250.1,Orysa4|Os10g42980.1,Orysa4|Os11g1120.1,Orysa4|Os01g37900.1,Orysa4|Os04g14330.1,Orysa4|Os07g15180.1,Orysa4|Os12g22470.1,Orysa4|Os08g08330.1,Orysa4|Os04g53750.1,Orysa4|Os09g12950.1,Orysa4|Os08g03780.1,Orysa4|Os12g22350.1  
Orysa4|Os04g15730.1  
AT5G53670  
Orysa4|Os09g03760.1,Orysa4|Os06g21710.1  
Orysa4|Os02g50410.1,Orysa4|Os01g58980.1  
AT2G19080 Orysa4|Os06g07160.1  
AT5G51410 Orysa4|Os07g27300.1  
Orysa4|Os10g37410.1  
AT5G53570  
AT5G41940  
AT3G49350,AT5G24390 Orysa4|Os09g35960.1  
AT1G80450 Orysa4|Os11g12790.1,Orysa4|Os04g55240.1  
AT5G08480  
AT3G15300,AT5G53830,AT1G28280,AT2G33780 Orysa4|Os01g54400.1,Orysa4|Os05g44270.1  
AT5G27010,AT5G06350,AT4G04680 Orysa4|Os04g39220.1  
Orysa4|Os02g02210.1,Orysa4|Os04g52440.1  
AT3G22200 Orysa4|Os08g10510.1  
AT5G38320,AT1G67050,AT1G68330 Orysa4|Os01g04080.1  
AT3G19870 Orysa4|Os02g58250.1  
AT2G04060  
AT2G28470 Orysa4|Os03g15020.1  
AT3G53050 Orysa4|Os05g35370.1  
Orysa4|Os06g37560.1,Orysa4|Os02g12730.1  
AT4G36360,AT1G45130 Orysa4|Os03g06940.1  
AT3G53070 Orysa4|Os12g24170.1  
AT1G31740,AT5G20710 Orysa4|Os06g42310.1,Orysa4|Os10g18400.1,Orysa4|Os10g19960.1  
AT2G32810 Orysa4|Os12g24184.1  
AT3G53080

AT3G13750,AT5G56870,AT4G26140,AT3G52840 Orysa4|Os01g39830.1  
AT1G77410,AT5G63800 Orysa4|Os05g35360.1  
AT4G35010,AT2G16730,AT4G38590 Orysa4|Os09g36810.1,Orysa4|Os08g43570.1  
AT5G63810 Orysa4|Os01g65460.1  
AT5G07830,AT5G61250 Orysa4|Os12g38920.1  
Orysa4|Os03g11320.1  
AT5G34940 Orysa4|Os06g08090.1,Orysa4|Os02g55870.1  
Orysa4|Os07g40740.1  
AT1G61940,AT2G47900 Orysa4|Os07g47110.1,Orysa4|Os03g22800.1  
Orysa4|Os12g06630.1  
AT1G43640,AT1G76900,AT1G25280  
AT2G18280 Orysa4|Os02g47640.1  
Orysa4|Os01g64700.1,Orysa4|Os05g36190.1  
AT1G47270  
AT1G53320 Orysa4|Os05g48670.1,Orysa4|Os01g48370.1,Orysa4|Os01g55430.1,Orysa4|Os05g43850.1  
Orysa4|Os04g59130.1,Orysa4|Os08g01290.1  
AT5G18680,AT3G06380  
Orysa4|Os02g03440.1,Orysa4|Os08g05530.1  
AT4G30330,AT2G18740  
AT5G47030 Orysa4|Os07g31300.1  
AT2G38560 Orysa4|Os07g12630.1,Orysa4|Os03g60130.1  
AT2G32380,AT1G05210,AT1G05220 Orysa4|Os03g44450.1,Orysa4|Os07g27450.1,Orysa4|Os07g27430.1  
AT3G61320,AT2G45870 Orysa4|Os03g01570.1  
AT2G17710 Orysa4|Os04g47310.1  
AT4G05210,AT4G21220 Orysa4|Os07g04200.1  
Orysa4|Os08g44440.1  
AT3G52220  
AT3G15460,AT1G52930 Orysa4|Os02g37870.1  
AT1G09340 Orysa4|Os12g23180.1  
Orysa4|Os09g38740.1  
AT4G00585  
AT3G09150 Orysa4|Os01g72090.1  
Orysa4|Os02g33730.1  
AT1G15120,AT2G01090 Orysa4|Os11g06340.1  
Orysa4|Os10g34350.1  
AT1G77670 Orysa4|Os09g28050.1  
AT3G59520 Orysa4|Os01g67040.1  
AT5G39940 Orysa4|Os12g44160.1  
AT4G36440 Orysa4|Os01g15790.1  
AT5G51720 Orysa4|Os07g28400.1  
AT1G24120 Orysa4|Os06g13060.1,Orysa4|Os02g50760.1  
AT1G68370 Orysa4|Os01g32870.1  
AT1G59980  
AT3G05560,AT5G27770 Orysa4|Os03g22340.1  
AT1G02830  
AT5G03990,AT3G51940 Orysa4|Os11g04510.1,Orysa4|Os12g04280.1,Orysa4|Os01g58700.1  
AT1G20110,Orysa4|Os06g50840.1  
AT4G34670,AT3G04840 Orysa4|Os12g21798.1,Orysa4|Os03g10340.1,Orysa4|Os02g18550.1  
AT3G11780,AT5G06480 Orysa4|Os07g06590.1,Orysa4|Os03g57420.1  
AT2G16005,AT3G44100  
AT2G20780 Orysa4|Os04g58220.1  
AT5G26340  
AT1G75220,AT1G19450 Orysa4|Os05g49260.1,Orysa4|Os05g49270.1,Orysa4|Os05g50280.1  
Orysa4|Os05g32900.1  
Orysa4|Os03g60820.1  
Orysa4|Os12g32760.1  
Orysa4|Os04g38280.1  
AT5G16150  
AT3G05150  
AT1G54720,AT1G08900,AT1G08890  
AT4G16480,AT2G35740 Orysa4|Os04g43210.1  
Orysa4|Os03g10100.1,Orysa4|Os03g10090.1  
AT2G18480,AT4G36670 Orysa4|Os10g21590.1  
AT2G43330 Orysa4|Os04g41460.1  
AT3G03090,AT5G17010 Orysa4|Os10g42830.1  
AT1G30220 Orysa4|Os07g05640.1  
AT1G11260,AT4G21480,AT3G19940,AT1G50310,AT5G23270,AT3G19930  
Orysa4|Os08g08070.1,Orysa4|Os01g38670.1,Orysa4|Os07g37320.1,Orysa4|Os07g01560.1,Orysa4|Os09  
g12590.1,Orysa4|Os03g39710.1  
AT1G05030 Orysa4|Os09g27900.1,Orysa4|Os09g23110.1  
AT4G02050 Orysa4|Os09g24924.1  
AT5G61520 Orysa4|Os07g03910.1,Orysa4|Os07g03960.1,Orysa4|Os09g09520.1,Orysa4|Os06g04900.1  
Orysa4|Os05g07750.1  
Orysa4|Os02g36490.1,Orysa4|Os12g04640.1  
Orysa4|Os01g04190.1  
AT3G05960,AT5G26250 Orysa4|Os07g10590.1  
AT1G67300,AT1G79820 Orysa4|Os02g17500.1  
AT5G18840 Orysa4|Os11g42430.1  
AT2G48020  
AT1G34580  
Orysa4|Os03g24860.1  
Orysa4|Os04g37990.1,Orysa4|Os04g38010.1,Orysa4|Os02g36440.1,Orysa4|Os02g36450.1,Orysa4|Os02

g36414.1,Orysa4|Os04g37970.1,Orysa4|Os04g38220.1,Orysa4|Os04g38026.1  
Orysa4|Os03g01170.1,Orysa4|Os10g41190.1  
AT3G05155  
AT5G59250  
AT1G77210 Orysa4|Os09g15330.1  
AT2G16130,AT2G16120,AT3G18830 Orysa4|Os01g73590.1,Orysa4|Os07g39350.1,Orysa4|Os07g39360.1  
Orysa4|Os10g40950.1,Orysa4|Os12g32940.1,Orysa4|Os11g41840.1,Orysa4|Os11g41850.1,Orysa4|Os11  
g41870.1  
AT1G08930,AT1G08920,AT3G05400,AT5G27360,AT5G27350,AT3G05160,AT3G05165,AT1G54730,AT3G20460  
AT4G04760,AT4G04750  
AT1G07340  
AT3G27160,AT5G63300 Orysa4|Os02g09590.1  
AT2G41945 Orysa4|Os06g10440.1  
AT2G25670,AT4G32610 Orysa4|Os01g08410.1,Orysa4|Os05g08730.1  
AT3G45300 Orysa4|Os05g03480.1  
AT4G14230,AT4G14240 Orysa4|Os05g32850.1  
AT1G03270  
AT1G47330  
AT2G14520,AT4G33700 Orysa4|Os03g47120.1  
AT5G52790  
AT4G38490 Orysa4|Os09g27690.1  
AT5G27290,AT1G54680 Orysa4|Os01g28540.1  
AT2G35450 Orysa4|Os03g01450.1,Orysa4|Os04g32150.1  
AT3G56430,AT2G40800 Orysa4|Os01g07382.1  
Orysa4|Os02g58310.1  
AT3G19900  
Orysa4|Os10g12330.1  
Orysa4|Os02g26510.1  
AT4G03680 Orysa4|Os10g24940.1,Orysa4|Os10g35890.1  
AT5G34540 Orysa4|Os03g41300.1  
Orysa4|Os08g13680.1  
Orysa4|Os04g28480.1,Orysa4|Os12g25260.1  
Orysa4|Os04g23360.1,Orysa4|Os02g26500.1,Orysa4|Os06g36060.1,Orysa4|Os04g28820.1,Orysa4|Os01  
g45880.1,Orysa4|Os03g42380.1,Orysa4|Os07g25650.1,Orysa4|Os12g27380.1,Orysa4|Os01g73070.1,Orysa4|Os10g  
11780.1,Orysa4|Os03g31560.1,Orysa4|Os01g08890.1,Orysa4|Os12g26850.1,Orysa4|Os01g28620.1,Orysa4|Os11g2  
8660.1,Orysa4|Os06g22380.1,Orysa4|Os11g13920.1,Orysa4|Os11g40920.1,Orysa4|Os08g24450.1,Orysa4|Os07g45  
750.1,Orysa4|Os02g32670.1,Orysa4|Os01g70630.1,Orysa4|Os07g02230.1,Orysa4|Os01g29390.1,Orysa4|Os12g166  
30.1,Orysa4|Os07g09300.1,Orysa4|Os06g29550.1,Orysa4|Os05g04260.1,Orysa4|Os08g18080.1,Orysa4|Os04g0375  
0.1,Orysa4|Os08g34850.1,Orysa4|Os07g44670.1,Orysa4|Os11g44014.1,Orysa4|Os08g41070.1,Orysa4|Os05g19050.  
1,Orysa4|Os01g19460.1,Orysa4|Os07g15980.1,Orysa4|Os08g20520.1  
Orysa4|Os07g10070.1  
Orysa4|Os02g21270.1  
Orysa4|Os04g34180.1  
Orysa4|Os06g29560.1  
AT3G30420,AT1G54430  
Orysa4|Os11g41190.1,Orysa4|Os11g38300.1,Orysa4|Os11g44830.1,Orysa4|Os05g02090.1,Orysa4|Os05  
g44786.1,Orysa4|Os11g47410.1,Orysa4|Os10g32030.1,Orysa4|Os10g31990.1,Orysa4|Os04g04390.1,Orysa4|Os01g  
62100.1,Orysa4|Os02g22280.1,Orysa4|Os01g43980.1  
AT3G43330  
Orysa4|Os10g35880.1,Orysa4|Os01g14200.1,Orysa4|Os01g12340.1,Orysa4|Os12g32690.1,Orysa4|Os10  
g23110.1,Orysa4|Os07g23540.1,Orysa4|Os01g37580.1,Orysa4|Os12g06230.1,Orysa4|Os04g29310.1,Orysa4|Os02g  
19290.1,Orysa4|Os09g28370.1,Orysa4|Os08g19470.1,Orysa4|Os02g19280.1  
Orysa4|Os11g28650.1,Orysa4|Os07g44770.1,Orysa4|Os05g28260.1,Orysa4|Os12g27370.1,Orysa4|Os05  
g14380.1,Orysa4|Os12g35410.1,Orysa4|Os06g29540.1,Orysa4|Os05g04250.1,Orysa4|Os01g07990.1,Orysa4|Os03g  
08400.1,Orysa4|Os04g51490.1,Orysa4|Os10g01780.1  
AT1G64410,AT1G52960,AT3G43350,AT3G42340,AT4G03690,AT3G30560,AT3G13250,AT3G42100,AT1G35940,AT5  
G32070,AT3G31980,AT5G37110,AT2G05080,AT4G03916  
Orysa4|Os08g22970.1  
AT5G28780 Orysa4|Os01g14770.1  
Orysa4|Os09g08960.1  
Orysa4|Os05g14390.1,Orysa4|Os04g29300.1  
AT4G07800  
Orysa4|Os09g04980.1,Orysa4|Os01g44200.1,Orysa4|Os10g22130.1,Orysa4|Os02g47340.1,Orysa4|Os02  
g24780.1,Orysa4|Os02g24090.1,Orysa4|Os12g23030.1,Orysa4|Os02g44350.1,Orysa4|Os06g09490.1,Orysa4|Os04g  
11850.1,Orysa4|Os10g11620.1,Orysa4|Os10g10730.1,Orysa4|Os07g15160.1,Orysa4|Os02g16300.1  
Orysa4|Os01g16130.1,Orysa4|Os04g05800.1,Orysa4|Os09g01380.1,Orysa4|Os08g30490.1,Orysa4|Os09  
g01390.1  
Orysa4|Os02g22590.1  
Orysa4|Os01g43990.1,Orysa4|Os01g62750.1  
Orysa4|Os12g19570.1  
AT3G51700,AT3G51690  
Orysa4|Os02g18170.1  
Orysa4|Os07g07030.1  
Orysa4|Os02g27870.1  
Orysa4|Os11g41400.1  
AT3G30730 Orysa4|Os12g17690.1  
AT3G42320 Orysa4|Os05g23690.1  
Orysa4|Os12g35460.1,Orysa4|Os11g12570.1,Orysa4|Os12g16620.1  
AT5G11810,Orysa4|Os02g04260.1  
AT2G33320,AT1G04540,AT2G13350,AT3G04360,AT4G01200 Orysa4|Os01g47040.1,Orysa4|Os02g57000.1  
AT1G20810 Orysa4|Os02g02550.1  
Orysa4|Os08g03700.1

Orysa4|Os03g32664.1,Orysa4|Os03g07010.1  
Orysa4|Os03g52570.1  
AT5G06090,AT3G11430,AT3G11325 Orysa4|Os05g38350.1  
AT2G38110Orysa4|Os01g63580.1  
Orysa4|Os05g37600.1  
AT1G06520 Orysa4|Os01g44069.1  
AT1G01610,AT4G00400 Orysa4|Os02g02340.1  
AT4G01950,AT1G02390  
Orysa4|Os06g35750.1,Orysa4|Os01g22560.1,Orysa4|Os01g22570.1,Orysa4|Os03g61720.1,Orysa4|Os12  
g37600.1,Orysa4|Os05g20100.1,Orysa4|Os01g14900.1,Orysa4|Os01g19390.1,Orysa4|Os10g41070.1  
Orysa4|Os03g07060.1,Orysa4|Os10g27330.1  
AT5G54540 Orysa4|Os03g10390.1,Orysa4|Os08g08190.1  
AT2G30090  
Orysa4|Os06g44100.1,Orysa4|Os02g08400.1  
AT2G23060,AT4G37580,AT5G67430 Orysa4|Os07g02540.1,Orysa4|Os03g55530.1,Orysa4|Os03g10810.1  
AT1G30960 Orysa4|Os08g10649.1  
Orysa4|Os02g49730.1  
AT1G70400,AT1G60170  
Orysa4|Os07g04850.1,Orysa4|Os04g46890.1  
AT2G28490 Orysa4|Os03g21790.1  
Orysa4|Os10g21330.1,Orysa4|Os04g16790.1,Orysa4|Os08g15250.1,Orysa4|Os05g22710.1,Orysa4|Os06  
g39700.1,Orysa4|Os01g57944.1,Orysa4|Os09g07910.1  
AT2G47830 Orysa4|Os03g22550.1  
AT4G03020 Orysa4|Os01g28680.1,Orysa4|Os05g05210.1,Orysa4|Os05g33710.1  
Orysa4|Os01g65890.1  
AT1G19025 Orysa4|Os08g01630.1  
Orysa4|Os08g06480.1  
AT2G25420 Orysa4|Os05g15040.1  
AT3G15880  
AT3G16830  
AT1G15750,AT1G80490 Orysa4|Os03g14980.1  
AT5G27030 Orysa4|Os01g15020.1  
AT3G07330  
Orysa4|Os11g13650.1,Orysa4|Os07g03260.1  
AT5G03760,AT5G22740 Orysa4|Os02g09930.1,Orysa4|Os06g42020.1  
AT5G16190,AT1G24070,AT4G13410,AT4G16590,AT3G56000,AT1G23480,AT2G35650  
Orysa4|Os09g25900.1  
Orysa4|Os02g51060.1,Orysa4|Os08g33740.1  
AT3G28180  
Orysa4|Os06g12460.1  
Orysa4|Os09g39920.1  
AT4G07960 Orysa4|Os05g43530.1,Orysa4|Os01g56130.1,Orysa4|Os03g56060.1  
AT2G24630,AT4G31590 Orysa4|Os08g15420.1  
Orysa4|Os03g07350.1,Orysa4|Os10g26630.1,Orysa4|Os09g26770.1,Orysa4|Os03g26044.1,Orysa4|Os07  
g43710.1  
Orysa4|Os11g06360.1  
AT1G78820,AT1G78830,AT1G78850,AT1G78860  
Orysa4|Os11g03860.1  
AT4G34150 Orysa4|Os06g43190.1  
AT1G60490 Orysa4|Os08g21590.1,Orysa4|Os05g08810.1  
AT1G77550 Orysa4|Os03g08140.1  
AT2G35500 Orysa4|Os10g42700.1  
AT2G17972 Orysa4|Os06g50130.1  
AT1G09450 Orysa4|Os07g44360.1  
AT3G47070 Orysa4|Os03g61090.1  
AT1G22750 Orysa4|Os06g38320.1  
AT5G14850 Orysa4|Os02g02110.1,Orysa4|Os01g39810.1  
AT5G26640  
AT3G05870 Orysa4|Os07g22840.1  
AT1G43245 Orysa4|Os04g34610.1  
AT2G31260 Orysa4|Os10g07994.1,Orysa4|Os03g14380.1  
AT5G59180 Orysa4|Os05g33240.1  
AT3G05100 Orysa4|Os07g47150.1  
AT2G14110Orysa4|Os03g52720.1,Orysa4|Os03g52730.1  
Orysa4|Os11g24630.1  
Orysa4|Os03g39830.1  
AT4G13500,AT2G05310  
AT2G21470 Orysa4|Os07g39780.1  
Orysa4|Os08g09860.1  
AT3G14420,AT3G14415,AT4G18360 Orysa4|Os03g57220.1  
Orysa4|Os04g53210.1  
Orysa4|Os07g42430.1  
AT3G14150,AT3G14130 Orysa4|Os07g42440.1  
AT4G12760 Orysa4|Os05g34480.1  
Orysa4|Os04g46290.1,Orysa4|Os02g43840.1  
AT5G25170,AT1G80690,AT2G25190 Orysa4|Os06g08360.1  
Orysa4|Os06g36490.1  
AT1G47740 Orysa4|Os03g10200.1  
AT4G17486,AT5G47310 Orysa4|Os03g01130.1  
AT1G03360 Orysa4|Os04g43922.1  
Orysa4|Os03g64020.1  
Orysa4|Os08g21900.1,Orysa4|Os08g41460.1

AT4G11960,AT4G22890 Orysa4|Os08g21880.1  
Orysa4|Os02g21960.1  
Orysa4|Os07g15520.1  
Orysa4|Os03g35400.1  
AT4G13320  
AT5G19840 Orysa4|Os01g56640.1  
Orysa4|Os01g08420.1  
AT2G25660  
AT4G10050 Orysa4|Os04g36620.1  
AT1G12000,AT4G04040  
AT1G20950,AT1G76550 Orysa4|Os02g48360.1,Orysa4|Os06g22060.1  
Orysa4|Os09g12650.1,Orysa4|Os08g25720.1  
AT4G08876  
Orysa4|Os08g15030.1  
AT3G20330  
AT1G70150 Orysa4|Os07g29770.1  
AT5G20090 Orysa4|Os09g20660.1  
AT3G03100 Orysa4|Os10g42840.1  
Orysa4|Os04g42870.1  
AT1G23360  
AT4G40050 Orysa4|Os09g29470.1  
Orysa4|Os12g35680.1  
AT3G03570  
AT1G53500,AT3G14790,AT1G78570 Orysa4|Os03g17000.1  
Orysa4|Os02g45540.1  
AT1G63000  
Orysa4|Os05g11360.1  
AT3G16150  
Orysa4|Os03g26100.1,Orysa4|Os01g55620.1,Orysa4|Os04g51420.1,Orysa4|Os02g33160.1,Orysa4|Os03g51120.1,Orysa4|Os04g46150.1,Orysa4|Os04g55710.1  
AT5G08100 Orysa4|Os03g40070.1  
AT4G25030,AT5G45410  
Orysa4|Os10g43060.1  
Orysa4|Os07g06550.1,Orysa4|Os06g02540.1  
AT1G55280 Orysa4|Os11g29900.1  
AT5G28646,AT3G04630,AT1G54460,AT3G23090  
Orysa4|Os03g58480.1,Orysa4|Os07g08790.1,Orysa4|Os11g38010.1  
Orysa4|Os02g52230.1,Orysa4|Os11g27450.1  
Orysa4|Os11g31620.1  
AT5G49980,AT4G24390 Orysa4|Os03g08850.1  
AT3G62980,AT4G03190 Orysa4|Os05g05800.1  
AT2G39940 Orysa4|Os05g37690.1,Orysa4|Os01g63420.1,Orysa4|Os03g15880.1  
AT1G12820,AT3G26810 Orysa4|Os04g32460.1  
Orysa4|Os02g42230.1  
Orysa4|Os06g47830.1  
AT3G02920  
AT2G24490 Orysa4|Os02g58220.1  
AT3G17030 Orysa4|Os03g61700.1  
AT1G78660,AT1G78680,AT1G78670 Orysa4|Os05g44130.1  
AT5G53870 Orysa4|Os06g46740.1,Orysa4|Os02g06670.1  
AT1G55740  
AT5G20250 Orysa4|Os06g07600.1  
AT4G01970  
Orysa4|Os12g36870.1  
AT5G40390 Orysa4|Os01g07530.1  
Orysa4|Os08g26200.1  
AT4G01265 Orysa4|Os01g15410.1  
AT3G57520 Orysa4|Os03g59430.1,Orysa4|Os07g10840.1  
Orysa4|Os04g40520.1  
Orysa4|Os01g61680.1,Orysa4|Os05g39060.1  
AT4G08330 Orysa4|Os05g03590.1  
AT3G24495 Orysa4|Os01g08540.1  
AT3G20475  
AT4G02070  
Orysa4|Os09g24220.1  
AT4G25540 Orysa4|Os04g58630.1  
AT1G60850,AT1G60620 Orysa4|Os02g49180.1,Orysa4|Os03g18410.1  
AT1G67140  
Orysa4|Os06g30894.1  
AT4G34030  
Orysa4|Os08g32850.1  
Orysa4|Os12g06660.1  
AT3G12110,Orysa4|Os12g44350.1,Orysa4|Os03g50890.1  
AT1G49240,AT3G18780  
AT2G37620,AT3G53750,AT5G59370,AT3G46520  
AT3G60830 Orysa4|Os03g56970.1  
Orysa4|Os01g64630.1,Orysa4|Os05g36290.1  
AT2G42170,AT2G42100  
AT1G73910  
AT1G18450 Orysa4|Os08g04280.1  
AT5G09810  
Orysa4|Os05g01600.1,Orysa4|Os01g73310.1,Orysa4|Os10g36650.1,Orysa4|Os11g06390.1

AT3G33520 Orysa4|Os01g16414.1  
AT1G13180 Orysa4|Os02g38340.1  
Orysa4|Os03g61970.1  
AT2G42090  
AT5G56180  
AT3G27000 Orysa4|Os08g28190.1  
AT5G06810 Orysa4|Os08g40630.1  
AT5G45113,AT4G19650  
AT3G60400 Orysa4|Os07g22670.1  
AT2G32200,AT2G32210,AT2G32190,AT1G05340,AT3G22231,AT1G56060 Orysa4|Os07g38050.1  
AT4G18300,AT2G34970,AT3G02270 Orysa4|Os02g56740.1  
AT1G77590 Orysa4|Os11g06880.1,Orysa4|Os12g07110.1  
AT4G23850,AT4G11030,AT1G64400 Orysa4|Os01g48910.1,Orysa4|Os01g46750.1  
AT1G49430  
AT2G47240 Orysa4|Os05g04170.1  
AT3G05970,AT5G27600 Orysa4|Os11g04980.1  
AT2G04350 Orysa4|Os05g25310.1  
Orysa4|Os09g15810.1  
AT2G38660  
AT3G12290 Orysa4|Os05g05830.1  
AT4G00600,AT4G00620 Orysa4|Os02g02850.1  
AT3G56510 Orysa4|Os07g46760.1  
Orysa4|Os05g03870.1  
AT5G38610,AT5G46970,AT5G46930,AT5G46940,AT5G46950,AT5G46960,AT5G46980,AT1G54620,AT5G46990  
Orysa4|Os02g46290.1,Orysa4|Os02g01310.1,Orysa4|Os02g01300.1  
AT4G06634 Orysa4|Os05g01550.1,Orysa4|Os02g34680.1  
AT5G61450 Orysa4|Os07g28260.1,Orysa4|Os03g01250.1  
AT2G33040  
Orysa4|Os10g17280.1  
AT2G37550,AT3G53710 Orysa4|Os03g17020.1  
Orysa4|Os01g53630.1,Orysa4|Os12g41380.1  
AT1G09730,AT4G33620 Orysa4|Os05g11770.1  
AT1G10570,AT1G60220 Orysa4|Os06g29310.1  
AT5G43070,AT1G47200,AT5G27940 Orysa4|Os03g11060.1  
AT2G22730,AT5G65687  
AT5G64500 Orysa4|Os04g44430.1  
AT5G22240  
AT5G19650  
Orysa4|Os05g36970.1,Orysa4|Os01g64430.1,Orysa4|Os01g12690.1  
AT5G46850 Orysa4|Os12g40500.1  
AT1G18640 Orysa4|Os12g31820.1,Orysa4|Os11g41160.1  
AT4G01995 Orysa4|Os05g04070.1  
AT1G03055  
AT1G64680  
Orysa4|Os11g37650.1  
AT3G24570 Orysa4|Os01g12800.1  
AT4G10330 Orysa4|Os01g66320.1  
Orysa4|Os11g13880.1  
AT1G08640 Orysa4|Os08g03380.1,Orysa4|Os10g33790.1  
AT5G67170 Orysa4|Os04g57480.1  
AT5G52270 Orysa4|Os08g21580.1  
AT1G11890  
Orysa4|Os01g13350.1  
Orysa4|Os06g09850.1,Orysa4|Os03g57760.1  
AT2G03050,AT2G34620  
AT2G36000 Orysa4|Os03g24590.1  
AT3G18870  
AT5G50460,AT4G24920  
AT3G48570  
Orysa4|Os02g08180.1  
AT4G34140 Orysa4|Os01g07540.1  
AT2G02410 Orysa4|Os03g62610.1  
AT1G79260 Orysa4|Os01g48760.1  
AT5G58130 Orysa4|Os02g04620.1,Orysa4|Os02g04560.1  
AT1G52730,AT3G15610,AT1G15470 Orysa4|Os02g11060.1,Orysa4|Os06g39760.1  
AT1G21440,AT1G77060  
AT2G43180 Orysa4|Os04g31700.1,Orysa4|Os04g42580.1  
AT4G15093 Orysa4|Os01g65690.1  
Orysa4|Os05g39770.1,Orysa4|Os03g21960.1  
AT2G38400  
AT4G39660 Orysa4|Os03g07570.1  
AT3G08860  
AT5G19480,AT5G12230 Orysa4|Os12g41962.1,Orysa4|Os03g44010.1  
AT5G05710 Orysa4|Os01g63800.1  
AT2G29700  
Orysa4|Os01g01280.1  
AT4G24930  
AT1G74060,AT1G74050,AT1G18540 Orysa4|Os02g37862.1,Orysa4|Os04g39700.1  
AT5G03415 Orysa4|Os10g30420.1,Orysa4|Os03g05760.1  
AT5G02470  
AT5G64180 Orysa4|Os12g31790.1  
AT5G36800,AT5G36710,AT3G02640,AT5G16250



Orysa4|Os01g67110.1,Orysa4|Os05g43140.1,Orysa4|Os04g41900.1  
Orysa4|Os01g62150.1,Orysa4|Os05g38610.1  
AT3G09800,AT4G08520,AT1G60970 Orysa4|Os02g21250.1  
Orysa4|Os01g57890.1  
AT4G17710,AT5G46880 Orysa4|Os10g42490.1  
AT2G32370  
AT4G00730,AT3G61150,AT5G52170 Orysa4|Os02g45250.1,Orysa4|Os04g48070.1  
AT4G26920,AT5G07260 Orysa4|Os01g44320.1  
Orysa4|Os07g47130.1,Orysa4|Os12g37090.1,Orysa4|Os07g24350.1,Orysa4|Os07g24330.1  
AT1G05230,AT4G04890,AT4G21750 Orysa4|Os04g53540.1,Orysa4|Os08g08820.1,Orysa4|Os08g04190.1  
AT1G34650,AT5G17320,AT3G03260  
AT1G79840  
AT1G17920,AT1G73360  
AT4G25530  
AT1G21720,AT1G77440 Orysa4|Os02g08520.1  
AT2G01120  
Orysa4|Os01g49010.1  
AT1G27760 Orysa4|Os03g33590.1,Orysa4|Os07g39900.1,Orysa4|Os02g12720.1  
AT2G22790  
Orysa4|Os08g35410.1,Orysa4|Os03g27850.1  
AT3G50340,AT5G67020 Orysa4|Os09g28340.1,Orysa4|Os08g36820.1  
AT1G10520 Orysa4|Os06g13020.1  
AT5G19910  
Orysa4|Os07g07020.1,Orysa4|Os10g41450.1  
AT5G61540  
Orysa4|Os04g46370.1  
Orysa4|Os02g37430.1  
AT3G07590,AT4G02840  
AT2G25830 Orysa4|Os05g44350.1  
Orysa4|Os04g26860.1  
AT2G31660 Orysa4|Os02g27470.1,Orysa4|Os04g26850.1  
AT3G59020  
AT1G20340,AT1G76100 Orysa4|Os06g01210.1  
Orysa4|Os03g46640.1  
AT3G46940  
AT4G25430,AT5G51850,AT5G62170 Orysa4|Os04g01610.1  
AT3G60100,AT2G44350 Orysa4|Os11g33240.1,Orysa4|Os02g10070.1  
AT2G11270Orysa4|Os02g55820.1  
Orysa4|Os10g41520.1  
AT5G47080,AT4G17640,AT3G60250,AT2G44680 Orysa4|Os07g31280.1  
AT5G53450 Orysa4|Os01g46720.1  
Orysa4|Os04g57350.1  
AT3G20290,AT4G05520 Orysa4|Os02g06340.1,Orysa4|Os06g47330.1  
AT1G69610,AT5G39785 Orysa4|Os09g24700.1  
AT3G61410,AT5G47740 Orysa4|Os06g18820.1  
AT3G54610 Orysa4|Os10g28040.1  
AT1G68000,AT4G38570 Orysa4|Os06g29650.1,Orysa4|Os02g03110.1  
AT5G63080 Orysa4|Os01g36630.1  
AT5G39360,AT5G15440 Orysa4|Os03g31310.1,Orysa4|Os07g40710.1  
AT3G63060 Orysa4|Os05g41490.1  
AT4G15140 Orysa4|Os04g42540.1  
AT5G22110Orysa4|Os08g36330.1,Orysa4|Os05g06840.1  
AT3G61590 Orysa4|Os01g47050.1  
AT5G61220  
Orysa4|Os10g26640.1,Orysa4|Os08g14070.1  
AT1G70160 Orysa4|Os08g32910.1  
AT4G27020,AT5G54870 Orysa4|Os01g58114.1  
AT3G58170 Orysa4|Os08g44930.1,Orysa4|Os02g57510.1  
AT4G14455  
AT1G31660 Orysa4|Os09g18320.1  
Orysa4|Os02g48130.1  
AT1G26090  
AT1G02510  
Orysa4|Os09g12790.1  
AT5G46360,AT5G46370,AT4G18160,AT4G01840  
AT5G55630 Orysa4|Os03g54100.1,Orysa4|Os07g01810.1  
Orysa4|Os10g21210.1  
Orysa4|Os01g58040.1  
Orysa4|Os10g41689.1,Orysa4|Os02g24630.1  
AT1G09995,AT1G79890 Orysa4|Os05g13300.1  
AT3G07060 Orysa4|Os08g04120.1  
AT1G49590 Orysa4|Os06g11170.1  
AT1G78100,AT1G22220 Orysa4|Os01g59690.1,Orysa4|Os03g20500.1  
AT4G18380,AT5G46170,AT1G30200 Orysa4|Os01g56390.1,Orysa4|Os05g43490.1  
AT4G37200 Orysa4|Os03g55820.1  
AT2G37290 Orysa4|Os03g17540.1  
AT2G39280,AT3G55020 Orysa4|Os05g38950.1  
AT1G65720 Orysa4|Os10g34270.1,Orysa4|Os03g01960.1  
AT4G30993 Orysa4|Os06g08470.1  
AT3G16190 Orysa4|Os02g17620.1,Orysa4|Os02g17640.1  
AT1G80930  
Orysa4|Os12g15420.1,Orysa4|Os11g05390.1

AT1G52325 Orysa4|Os12g17550.1  
 AT2G01110 Orysa4|Os01g31680.1  
 Orysa4|Os12g17370.1  
 Orysa4|Os03g58900.1,Orysa4|Os07g09670.1  
 AT4G21060 Orysa4|Os08g03670.1  
 AT3G06440 Orysa4|Os08g30140.1  
 AT1G27120,AT1G74800,AT5G62620 Orysa4|Os03g58920.1,Orysa4|Os07g09690.1  
 Orysa4|Os02g36770.1  
 Orysa4|Os12g41956.1  
 Orysa4|Os01g22550.1  
 Orysa4|Os12g16480.1  
 AT1G26810 Orysa4|Os06g12390.1  
 AT4G33350 Orysa4|Os06g11020.1  
 AT3G23710 Orysa4|Os07g19030.1  
 AT4G18810 Orysa4|Os02g13970.1  
 AT5G53000 Orysa4|Os11g04520.1,Orysa4|Os12g04290.1  
 AT1G73790,AT4G09550 Orysa4|Os03g60900.1,Orysa4|Os03g32150.1,Orysa4|Os03g32140.1  
 AT3G60520,AT1G02070 Orysa4|Os02g44090.1,Orysa4|Os04g46600.1  
 Orysa4|Os03g08840.1  
 Orysa4|Os04g37700.1  
 AT2G35020,AT1G31070 Orysa4|Os04g52370.1,Orysa4|Os08g10600.1  
 Orysa4|Os08g14090.1,Orysa4|Os08g14109.1,Orysa4|Os11g17540.1,Orysa4|Os08g14000.1,Orysa4|Os08g14020.1,Orysa4|Os11g17504.1  
 Orysa4|Os08g18860.1,Orysa4|Os08g14030.1  
 Orysa4|Os08g14060.1  
 Orysa4|Os05g33190.1,Orysa4|Os05g33200.1  
 Orysa4|Os05g33090.1  
 AT3G23570,AT3G23600 Orysa4|Os05g33110.1,Orysa4|Os05g33100.1  
 AT3G11580,AT5G06250,AT2G36080 Orysa4|Os02g45850.1,Orysa4|Os04g49230.1,Orysa4|Os03g02900.1,Orysa4|Os08g06120.1  
 AT1G13260,AT3G25730,AT1G25560,AT1G68840 Orysa4|Os01g04800.1,Orysa4|Os01g04750.1,Orysa4|Os01g49830.1  
 Orysa4|Os11g05740.1  
 AT3G61970,AT2G46870,AT4G01500,AT1G01030  
 AT1G51120,AT1G50680 Orysa4|Os02g25820.1,Orysa4|Os02g25830.1  
 Orysa4|Os12g06080.1  
 AT4G32020,AT2G25250,AT4G02040 Orysa4|Os02g55430.1  
 Orysa4|Os05g33580.1  
 AT3G21570 Orysa4|Os01g28790.1  
 AT1G64980 Orysa4|Os07g23120.1,Orysa4|Os10g37230.1  
 AT2G16070 Orysa4|Os07g03130.1  
 AT3G44190,AT5G22140 Orysa4|Os02g05680.1  
 Orysa4|Os11g05970.1  
 AT4G16444 Orysa4|Os06g09840.1  
 AT1G31190 Orysa4|Os02g07350.1  
 AT3G02870 Orysa4|Os03g39000.1  
 Orysa4|Os07g48950.1  
 AT3G66658 Orysa4|Os07g48920.1  
 AT1G74920,AT3G48170 Orysa4|Os04g39020.1,Orysa4|Os08g32870.1  
 AT2G14170 Orysa4|Os07g09060.1  
 Orysa4|Os06g39230.1  
 AT3G24503 Orysa4|Os01g40860.1,Orysa4|Os01g40870.1  
 AT3G48000,AT1G23800 Orysa4|Os02g49720.1  
 AT1G79440 Orysa4|Os02g07760.1  
 AT1G54100 Orysa4|Os09g26880.1  
 AT2G42975 Orysa4|Os01g47630.1  
 AT5G35740,AT2G04910,AT1G29380,AT2G30933,AT5G53600,AT5G53610,AT5G63230,AT4G09090,AT5G63250,AT5G63240,AT4G16165,AT1G66870,AT1G66855  
 AT5G20340,AT5G20330,AT1G33220,AT5G20390,AT5G20560  
 AT3G46570 Orysa4|Os07g13580.1  
 AT3G55780,AT3G61810 Orysa4|Os08g04140.1,Orysa4|Os05g50490.1  
 AT4G29360 Orysa4|Os01g53750.1  
 Orysa4|Os03g56130.1,Orysa4|Os01g71474.1,Orysa4|Os05g31140.1  
 AT1G30080,AT4G18340 Orysa4|Os06g34020.1  
 AT1G66250  
 AT3G58100  
 AT1G77790,AT1G77780 Orysa4|Os05g41610.1,Orysa4|Os01g58730.1  
 AT1G26450,AT1G69295  
 AT4G16260,AT3G57240,AT3G57260,AT3G57270 Orysa4|Os01g71350.1,Orysa4|Os01g51570.1,Orysa4|Os01g71340.1,Orysa4|Os01g71400.1,Orysa4|Os01g71380.1,Orysa4|Os01g71670.1,Orysa4|Os01g71810.1,Orysa4|Os01g71830.1,Orysa4|Os01g71860.1,Orysa4|Os01g71680.1,Orysa4|Os01g71930.1,Orysa4|Os03g40330.1,Orysa4|Os01g71410.1  
 AT3G07320,AT4G14080,AT3G23770 Orysa4|Os03g62860.1,Orysa4|Os08g41410.1  
 Orysa4|Os03g14210.1,Orysa4|Os10g07290.1,Orysa4|Os06g04080.1  
 AT2G42930 Orysa4|Os07g43940.1,Orysa4|Os03g25790.1  
 AT3G13560 Orysa4|Os07g38930.1  
 AT4G05430  
 AT3G28250,AT2G43670,AT2G43660,AT1G78520

Orysa4|Os06g35920.1  
Orysa4|Os03g22530.1  
AT3G15800,AT2G26600 Orysa4|Os06g40490.1,Orysa4|Os02g10660.1  
Orysa4|Os03g61780.1  
AT2G27500 Orysa4|Os04g33640.1,Orysa4|Os02g33000.1,Orysa4|Os05g37130.1  
AT2G01630 Orysa4|Os03g12140.1  
AT1G09460  
Orysa4|Os07g35520.1,Orysa4|Os07g35560.1,Orysa4|Os07g35350.1,Orysa4|Os07g35510.1,Orysa4|Os08  
g14700.1,Orysa4|Os07g35470.1  
AT5G67460 Orysa4|Os01g55820.1,Orysa4|Os03g54910.1,Orysa4|Os03g30830.1  
Orysa4|Os10g20650.1  
AT5G56590  
Orysa4|Os01g14140.1  
AT2G39640,AT3G55430 Orysa4|Os11g47820.1  
AT5G24318  
AT2G16230,AT4G34480,AT5G42720 Orysa4|Os03g51240.1,Orysa4|Os03g12620.1,Orysa4|Os03g46660.1  
AT1G32860,AT5G42100  
AT1G11820,Orysa4|Os07g32600.1  
Orysa4|Os09g36280.1  
AT4G13600 Orysa4|Os06g45450.1  
AT5G55180,AT4G26830,AT2G05790 Orysa4|Os02g53200.1  
Orysa4|Os06g34660.1  
AT2G03505,AT1G13830,AT5G08000,AT5G61130,AT1G18650  
AT5G13880,AT5G47920 Orysa4|Os02g30240.1,Orysa4|Os04g31350.1  
AT1G79915 Orysa4|Os06g43250.1  
AT1G28510 Orysa4|Os01g14020.1  
Orysa4|Os02g20844.1  
AT3G58150 Orysa4|Os01g54950.1  
AT3G50030,AT5G43120  
AT5G10200 Orysa4|Os05g34820.1  
AT1G43860 Orysa4|Os08g01620.1  
AT2G25930,AT3G21320 Orysa4|Os01g38530.1,Orysa4|Os06g05060.1  
AT1G02120  
Orysa4|Os07g30940.1  
Orysa4|Os10g39430.1  
Orysa4|Os12g40800.1  
AT1G42550 Orysa4|Os09g38090.1  
AT2G32415 Orysa4|Os07g32890.1  
AT4G29060 Orysa4|Os12g35630.1  
AT4G32260 Orysa4|Os03g17070.1  
AT4G26310 Orysa4|Os03g59160.1  
AT3G03790 Orysa4|Os07g07080.1  
AT1G13050,AT3G26350 Orysa4|Os01g68080.1,Orysa4|Os01g68090.1  
AT5G56050,AT4G26490,AT5G56070 Orysa4|Os08g38580.1  
AT3G17920,AT1G48540  
Orysa4|Os03g12160.1  
AT2G33280,AT1G04570 Orysa4|Os07g24230.1  
AT1G64890 Orysa4|Os05g32320.1  
AT2G24290,AT4G30996,AT4G04360,AT1G05070,AT2G32580 Orysa4|Os04g42340.1  
AT5G28750 Orysa4|Os03g43430.1  
AT1G34360 Orysa4|Os02g01110.1  
Orysa4|Os10g23060.1  
AT2G14095  
Orysa4|Os04g37760.1  
AT1G36280,AT4G18440 Orysa4|Os03g19930.1  
AT3G56750,AT2G41150 Orysa4|Os07g44700.1,Orysa4|Os03g25110.1  
AT3G01740,AT5G14290 Orysa4|Os12g14080.1  
AT1G16090 Orysa4|Os05g18800.1  
Orysa4|Os07g07380.1  
Orysa4|Os08g15590.1  
Orysa4|Os10g25180.1  
AT3G14205 Orysa4|Os03g08430.1  
Orysa4|Os02g54150.1,Orysa4|Os06g09540.1  
AT1G17340  
Orysa4|Os07g23930.1  
AT3G43220,AT5G20840  
AT1G22620 Orysa4|Os06g24840.1,Orysa4|Os08g01750.1  
AT5G06760 Orysa4|Os09g10620.1,Orysa4|Os08g23870.1,Orysa4|Os06g21910.1  
AT2G43950 Orysa4|Os12g12370.1  
Orysa4|Os02g39600.1  
AT4G20960 Orysa4|Os03g02600.1,Orysa4|Os04g09810.1  
AT1G67030  
AT1G10480 Orysa4|Os01g32920.1  
AT1G68360 Orysa4|Os01g04120.1  
Orysa4|Os03g19380.1  
AT3G62410,AT2G47400 Orysa4|Os01g19740.1  
Orysa4|Os08g40240.1  
AT1G76560  
Orysa4|Os04g50760.1  
AT1G32340 Orysa4|Os04g50740.1,Orysa4|Os04g50720.1  
Orysa4|Os02g46730.1,Orysa4|Os02g46720.1,Orysa4|Os02g46740.1  
Orysa4|Os11g15210.1,Orysa4|Os04g47080.1,Orysa4|Os04g47040.1,Orysa4|Os04g47059.1,Orysa4|Os01

g39480.1,Orysa4|Os01g39580.1  
AT4G09820 Orysa4|Os07g11020.1  
AT5G41315,AT1G63650,AT4G00480 Orysa4|Os01g39560.1  
AT1G18000,AT1G18010 Orysa4|Os04g01520.1  
AT2G18230 Orysa4|Os02g47600.1  
AT4G01480,AT1G01050,AT2G46860 Orysa4|Os10g26600.1  
Orysa4|Os01g21900.1,Orysa4|Os04g59040.1,Orysa4|Os01g64670.1,Orysa4|Os05g36260.1  
AT3G53620 Orysa4|Os01g74350.1  
Orysa4|Os08g31880.1,Orysa4|Os08g31890.1,Orysa4|Os08g31910.1,Orysa4|Os08g31920.1  
AT1G61600,AT1G13510,AT1G13540,AT1G13470,AT1G13520,AT1G13480,AT1G13490,AT1G13500,AT1G13530,AT1  
G13550 Orysa4|Os08g31860.1,Orysa4|Os08g31850.1  
AT4G14305 Orysa4|Os08g45210.1  
AT4G04470 Orysa4|Os02g13270.1  
AT2G45450,AT3G60890 Orysa4|Os09g34890.1  
AT1G07020 Orysa4|Os01g38490.1  
AT1G72610,AT5G20630 Orysa4|Os08g35760.1  
Orysa4|Os02g29020.1,Orysa4|Os02g29010.1  
Orysa4|Os01g72290.1,Orysa4|Os03g44880.1,Orysa4|Os01g18170.1  
Orysa4|Os09g39510.1  
Orysa4|Os05g10830.1  
AT3G05930,AT5G26700  
AT1G18970,AT1G18980,AT1G74820 Orysa4|Os03g58980.1,Orysa4|Os03g59010.1,Orysa4|Os03g58990.1  
Orysa4|Os01g50900.1  
Orysa4|Os08g35750.1  
Orysa4|Os08g08960.1,Orysa4|Os08g08920.1,Orysa4|Os08g09010.1,Orysa4|Os08g09020.1,Orysa4|Os08  
g09040.1,Orysa4|Os08g09000.1,Orysa4|Os08g08990.1,Orysa4|Os08g09080.1,Orysa4|Os08g13440.1,Orysa4|Os08g  
08980.1,Orysa4|Os12g05840.1,Orysa4|Os12g05860.1,Orysa4|Os12g05880.1,Orysa4|Os04g52720.1  
AT1G09560  
AT5G61750 Orysa4|Os11g33110.1  
Orysa4|Os03g48760.1,Orysa4|Os03g48780.1,Orysa4|Os03g48750.1  
AT3G10080 Orysa4|Os02g32980.1  
AT3G04200,AT3G05950,AT3G04180,AT3G04190,AT3G04150,AT3G04170,AT5G38930,AT5G38940,AT5G38910,AT4  
G14630,AT5G38950,AT5G38960,AT5G39180,AT5G39150,AT5G39120,AT5G39110,AT5G39100,AT5G39190,AT5G39  
160,AT5G39130  
Orysa4|Os09g39530.1,Orysa4|Os09g39520.1  
AT1G10460 Orysa4|Os03g08150.1  
Orysa4|Os08g01020.1  
AT3G62020 Orysa4|Os01g14670.1,Orysa4|Os05g19670.1  
AT3G24460,AT4G13345 Orysa4|Os01g08460.1  
AT2G33205 Orysa4|Os04g42720.1  
Orysa4|Os01g01020.1  
AT2G46950,AT4G27710,AT2G46960  
Orysa4|Os07g44110.1,Orysa4|Os07g44130.1,Orysa4|Os07g23710.1,Orysa4|Os07g23570.1,Orysa4|Os01  
g24780.1,Orysa4|Os06g09220.1,Orysa4|Os06g09210.1,Orysa4|Os03g25480.1  
AT1G67110,AT5G38450 Orysa4|Os08g33300.1  
AT5G24910,AT5G24900  
Orysa4|Os12g02630.1  
Orysa4|Os02g39764.1  
Orysa4|Os01g52790.1,Orysa4|Os05g30890.1,Orysa4|Os01g43760.1,Orysa4|Os01g43750.1,Orysa4|Os01  
g43720.1,Orysa4|Os01g43774.1,Orysa4|Os01g41820.1,Orysa4|Os01g43740.1,Orysa4|Os01g43700.1  
Orysa4|Os11g32790.1  
AT1G75130 Orysa4|Os05g33590.1,Orysa4|Os05g33600.1  
Orysa4|Os01g52800.1,Orysa4|Os03g25500.1  
AT5G52400 Orysa4|Os02g57810.1  
AT2G26710 Orysa4|Os06g39880.1,Orysa4|Os02g11020.1,Orysa4|Os01g29150.1,Orysa4|Os07g45290.1  
AT3G14660,AT3G14650,AT3G14690,AT3G14640,AT3G14680,AT3G14610,AT3G14630,AT3G14620,AT1G17060  
Orysa4|Os05g31580.1  
Orysa4|Os11g02710.1,Orysa4|Os12g02640.1,Orysa4|Os05g40384.1  
Orysa4|Os01g41800.1  
Orysa4|Os07g48330.1,Orysa4|Os03g21400.1  
AT2G37380,AT2G39370 Orysa4|Os05g02980.1,Orysa4|Os05g38690.1,Orysa4|Os03g17260.1  
AT1G17330 Orysa4|Os10g34470.1  
Orysa4|Os08g09370.1  
AT1G78510,AT1G17050 Orysa4|Os12g17320.1,Orysa4|Os05g50550.1  
AT2G34630 Orysa4|Os06g46450.1  
AT2G19520,AT4G29730  
Orysa4|Os01g51300.1  
AT3G27610,AT2G01220 Orysa4|Os01g49670.1  
Orysa4|Os02g02970.1  
AT2G45620 Orysa4|Os10g11034.1  
AT4G35410,AT2G17380 Orysa4|Os03g57040.1  
Orysa4|Os03g59660.1  
AT3G50860  
Orysa4|Os01g25110.1,Orysa4|Os03g12710.1  
Orysa4|Os12g10560.1  
AT1G47830  
AT2G19790 Orysa4|Os08g30480.1,Orysa4|Os10g22330.1  
AT1G02720,AT4G02130,AT3G62660 Orysa4|Os03g18890.1  
Orysa4|Os02g50600.1,Orysa4|Os06g13760.1  
AT1G24170,AT1G70090  
AT1G19300,AT3G50760 Orysa4|Os10g31650.1,Orysa4|Os03g47530.1  
AT3G28340

AT3G06260 Orysa4|Os07g45260.1,Orysa4|Os03g24510.1  
AT1G13250 Orysa4|Os04g44850.1  
AT1G52160,AT3G16260 Orysa4|Os01g13150.1  
AT1G53520 Orysa4|Os02g21520.1  
Orysa4|Os06g37660.1,Orysa4|Os02g12580.1  
AT1G50370,AT3G19980 Orysa4|Os01g49690.1  
AT4G11240,AT1G64040 Orysa4|Os06g06880.1  
AT1G59830,AT1G10430,AT1G69960  
Orysa4|Os03g07150.1,Orysa4|Os10g27050.1  
AT3G46820,AT5G59160 Orysa4|Os02g57450.1  
Orysa4|Os08g35440.1  
AT5G63870 Orysa4|Os08g40200.1  
AT2G29400  
AT5G55260,AT4G26720 Orysa4|Os09g11230.1  
AT2G42810 Orysa4|Os05g11550.1  
AT5G43380  
AT3G05580,AT5G27840 Orysa4|Os01g24750.1  
AT3G58500,AT2G42500 Orysa4|Os03g59060.1  
AT2G39840 Orysa4|Os03g16110.1  
AT1G48120  
AT5G10900  
AT1G48175 Orysa4|Os03g20570.1  
AT5G48720 Orysa4|Os01g68930.1  
AT5G08060 Orysa4|Os01g55770.1  
AT3G07170,AT5G48680 Orysa4|Os08g41480.1  
AT3G46870 Orysa4|Os07g36450.1  
AT1G62350 Orysa4|Os03g18620.1  
AT3G55160 Orysa4|Os08g07290.1  
AT2G46980 Orysa4|Os10g26560.1  
Orysa4|Os09g32170.1  
AT1G72380 Orysa4|Os10g25200.1  
Orysa4|Os03g07720.1  
AT1G72390  
Orysa4|Os01g02860.1  
AT5G07500  
AT3G55980,AT2G40140,AT5G58620 Orysa4|Os05g03760.1  
Orysa4|Os07g47240.1  
AT5G44260,AT1G03790  
AT5G12850  
Orysa4|Os05g10670.1,Orysa4|Os01g09620.1  
Orysa4|Os10g32800.1  
Orysa4|Os01g53650.1,Orysa4|Os05g45020.1  
Orysa4|Os07g38090.1  
AT2G19810,AT4G29190,AT2G25900  
Orysa4|Os07g38740.1  
AT2G41900  
Orysa4|Os04g41060.1  
Orysa4|Os12g33090.1,Orysa4|Os03g49170.1  
AT4G21700  
Orysa4|Os01g48640.1,Orysa4|Os01g48660.1,Orysa4|Os01g48620.1,Orysa4|Os01g48610.1,Orysa4|Os05  
g48370.1  
AT1G79790 Orysa4|Os11g19460.1  
AT3G06483 Orysa4|Os03g25400.1,Orysa4|Os07g44330.1  
AT4G33925 Orysa4|Os07g40310.1  
AT1G80180,AT1G15400,AT5G20100  
Orysa4|Os01g50870.1,Orysa4|Os05g46500.1,Orysa4|Os01g07890.1,Orysa4|Os05g08390.1,Orysa4|Os06  
g39912.1  
AT1G08233  
AT1G67640,AT1G24400 Orysa4|Os12g14100.1  
AT4G35180  
AT1G08230 Orysa4|Os01g63854.1  
AT1G25530 Orysa4|Os04g38860.1  
AT5G40780,AT1G48640  
AT5G41800 Orysa4|Os01g43320.1,Orysa4|Os05g50920.1  
Orysa4|Os08g03350.1  
AT1G71680  
Orysa4|Os05g14820.1  
Orysa4|Os10g27980.1  
AT1G47670 Orysa4|Os12g30040.1  
AT3G01760,AT1G61270  
AT1G16080 Orysa4|Os08g16570.1  
AT2G30320  
Orysa4|Os03g21980.1  
AT3G51820 Orysa4|Os05g28200.1  
AT2G27530,AT1G08360,AT5G22440 Orysa4|Os02g21660.1,Orysa4|Os01g64090.1,Orysa4|Os08g44450.1  
AT3G55880,AT2G40095 Orysa4|Os03g03200.1  
AT3G10840 Orysa4|Os11g02660.1  
AT1G80280,AT1G15490,AT1G52750 Orysa4|Os01g45960.1  
AT5G57300 Orysa4|Os01g74520.1  
AT4G02030 Orysa4|Os03g52770.1  
AT5G14030 Orysa4|Os05g01262.1  
AT3G56660,AT2G40950

AT3G10800 Orysa4|Os07g44950.1  
AT5G23120 Orysa4|Os06g51330.1  
AT5G52490 Orysa4|Os10g32500.1  
AT5G52470,AT4G25630 Orysa4|Os02g57590.1  
AT4G19370,AT1G31720 Orysa4|Os02g47450.1  
AT3G53630 Orysa4|Os03g17140.1  
AT5G50960 Orysa4|Os02g38900.1  
Orysa4|Os03g58280.1  
AT1G50900 Orysa4|Os07g33660.1  
AT2G15220,AT2G15130,AT2G15170 Orysa4|Os10g34910.1,Orysa4|Os10g34930.1,Orysa4|Os10g34920.1  
AT3G01160 Orysa4|Os07g34740.1  
Orysa4|Os01g58760.1,Orysa4|Os05g41540.1  
AT3G51960  
AT4G35040,AT2G16770 Orysa4|Os06g50310.1  
AT5G50970 Orysa4|Os03g63470.1  
AT5G19920 Orysa4|Os07g40460.1  
AT1G26660 Orysa4|Os09g33870.1  
AT2G43370  
AT1G35620 Orysa4|Os04g35290.1,Orysa4|Os02g34530.1  
AT4G29735 Orysa4|Os06g37070.1  
AT4G26730,AT2G16030 Orysa4|Os01g57620.1  
AT5G02310 Orysa4|Os01g05500.1  
AT5G42760 Orysa4|Os03g56370.1  
AT3G43260,AT3G62530  
AT3G58180 Orysa4|Os12g06620.1  
AT5G04830 Orysa4|Os01g73500.1  
AT4G24790 Orysa4|Os12g19180.1  
Orysa4|Os08g02670.1  
AT4G18820,AT5G45720 Orysa4|Os05g45340.1,Orysa4|Os01g53070.1  
AT2G02480,AT1G14460 Orysa4|Os12g10670.1,Orysa4|Os11g13990.1  
AT4G16160 Orysa4|Os03g19290.1  
AT2G28900 Orysa4|Os05g02060.1  
Orysa4|Os01g19770.1  
AT3G31415,AT4G16740,AT4G16730,AT3G25830,AT3G25820,AT3G25810,AT2G24210  
Orysa4|Os05g16980.1  
AT2G37140 Orysa4|Os02g26014.1  
Orysa4|Os03g22620.1  
Orysa4|Os05g24500.1  
Orysa4|Os03g24720.1  
Orysa4|Os04g27480.1  
AT1G61680 Orysa4|Os10g34790.1,Orysa4|Os02g02930.1  
AT3G14490,AT3G29410,AT3G32030,AT1G33750,AT3G14540,AT3G14520,AT1G31950,AT4G13300,AT4G13280,AT5  
G44630,AT4G20200,AT1G66020,AT4G20230,AT3G29190,AT4G20210,AT3G29110,AT1G48820,AT1G48800,AT2G23  
230,AT4G15870,AT5G48110,AT1G70080,AT5G23960  
Orysa4|Os08g07100.1,Orysa4|Os08g07080.1,Orysa4|Os08g07120.1,Orysa4|Os01g23530.1,Orysa4|Os08  
g04500.1,Orysa4|Os05g17010.1,Orysa4|Os04g27190.1,Orysa4|Os04g27760.1,Orysa4|Os04g27790.1,Orysa4|Os04g  
27540.1,Orysa4|Os04g27400.1,Orysa4|Os04g27430.1,Orysa4|Os04g27720.1,Orysa4|Os04g26980.1,Orysa4|Os04g2  
6960.1,Orysa4|Os04g27070.1,Orysa4|Os01g42610.1,Orysa4|Os03g22634.1,Orysa4|Os03g22634.1,Orysa4|Os03g24710.1,Orysa4|Os03g24  
650.1,Orysa4|Os03g24690.1,Orysa4|Os03g24680.1,Orysa4|Os04g01810.1  
AT4G13870,AT4G13885 Orysa4|Os04g03990.1  
AT4G24450  
AT1G10760 Orysa4|Os06g30310.1  
AT5G52640 Orysa4|Os04g01740.1  
Orysa4|Os09g30438.1,Orysa4|Os08g39140.1  
AT5G56010,AT5G56030,AT5G56000  
Orysa4|Os09g36420.1  
Orysa4|Os02g25570.1  
AT2G04030 Orysa4|Os08g38086.1,Orysa4|Os09g29840.1  
AT4G24190 Orysa4|Os06g50300.1  
AT3G07770 Orysa4|Os12g32986.1  
AT4G37720,AT2G22860,AT3G49780,AT5G65870,AT1G13590  
Orysa4|Os11g35310.1,Orysa4|Os07g03200.1,Orysa4|Os03g12990.1  
AT2G44850 Orysa4|Os02g43810.1  
AT3G01390,AT4G23710 Orysa4|Os02g47320.1,Orysa4|Os04g51270.1  
AT4G25950  
AT1G50450 Orysa4|Os11g04490.1,Orysa4|Os12g04260.1  
AT2G20190 Orysa4|Os02g40430.1,Orysa4|Os04g42840.1  
Orysa4|Os02g57120.1  
AT3G58830 Orysa4|Os01g58390.1  
AT5G37630 Orysa4|Os06g14460.1  
AT1G75670 Orysa4|Os06g07190.1  
AT3G23940 Orysa4|Os08g44530.1

AT5G51400,AT2G45010 Orysa4|Os03g01210.1  
AT2G18660 Orysa4|Os06g47390.1,Orysa4|Os06g47360.1  
Orysa4|Os08g37930.1  
AT4G30380 Orysa4|Os09g29690.1,Orysa4|Os09g29710.1,Orysa4|Os09g29740.1  
AT5G48520 Orysa4|Os07g08810.1,Orysa4|Os06g08730.1  
AT3G57200,AT2G41450,AT3G08550 Orysa4|Os01g13200.1  
Orysa4|Os12g02380.1,Orysa4|Os11g02450.1  
AT3G08740  
AT2G45100,AT3G09360,AT2G01280,AT4G19550 Orysa4|Os05g23940.1  
AT4G05523,AT1G13120 Orysa4|Os02g38250.1  
Orysa4|Os04g52710.1  
AT3G22425,AT4G14910  
AT3G17470 Orysa4|Os05g06920.1,Orysa4|Os05g06890.1  
AT4G13580,AT3G24020 Orysa4|Os03g05030.1  
Orysa4|Os12g19530.1  
AT1G67840  
AT5G66870  
AT1G31320 Orysa4|Os03g45750.1  
AT1G16530  
AT4G22700,AT5G35900,AT2G23660  
Orysa4|Os04g33250.1,Orysa4|Os02g48270.1  
AT2G42430 Orysa4|Os02g57490.1  
AT1G65620  
AT3G27940 Orysa4|Os08g31080.1  
AT2G42440,AT3G58190 Orysa4|Os01g56530.1  
AT2G31310 Orysa4|Os03g41600.1  
AT2G40470 Orysa4|Os01g66590.1  
AT3G13850,AT1G72980  
AT2G30130 Orysa4|Os05g27980.1  
AT5G06080  
AT3G11090  
AT3G03760 Orysa4|Os03g05510.1  
Orysa4|Os01g39180.1  
Orysa4|Os08g06659.1,Orysa4|Os01g39220.1,Orysa4|Os01g39150.1,Orysa4|Os01g39160.1  
AT4G00220,AT2G45420  
AT1G36000,AT2G19510,AT2G19820  
AT2G30340 Orysa4|Os10g07510.1  
Orysa4|Os08g44940.1  
AT5G63090,AT3G27650 Orysa4|Os11g01550.1,Orysa4|Os12g01550.1  
AT2G45410,AT4G00210  
AT2G28500,AT1G07900 Orysa4|Os05g03160.1,Orysa4|Os03g17810.1  
AT3G47870  
AT1G06280 Orysa4|Os01g14030.1  
AT3G26660,AT3G26620,AT3G50510  
Orysa4|Os03g05500.1  
AT2G21070 Orysa4|Os02g02880.1  
AT1G62800,AT5G19550  
AT2G30970 Orysa4|Os06g35540.1,Orysa4|Os02g14110.1  
AT4G31990 Orysa4|Os02g55420.1  
Orysa4|Os01g55540.1  
AT5G11520  
AT2G22880,AT4G37710 Orysa4|Os03g47280.1  
AT2G30060,AT1G07140,AT5G58590 Orysa4|Os03g18180.1,Orysa4|Os05g28290.1  
AT1G44920 Orysa4|Os03g51930.1  
AT1G09830 Orysa4|Os12g09540.1,Orysa4|Os08g09210.1  
AT2G20495 Orysa4|Os07g27460.1  
Orysa4|Os06g09820.1,Orysa4|Os06g09830.1  
AT1G19130  
AT1G14850 Orysa4|Os06g20090.1  
AT5G23230,AT5G23220 Orysa4|Os04g44420.1  
AT4G10710,AT4G10670 Orysa4|Os08g31240.1,Orysa4|Os04g25550.1  
AT4G29330 Orysa4|Os02g43912.1  
AT5G51290 Orysa4|Os02g43906.1  
AT4G24080,AT4G24070,AT4G10750 Orysa4|Os09g36030.1  
AT5G44790 Orysa4|Os02g07630.1,Orysa4|Os06g45500.1  
Orysa4|Os07g43040.1,Orysa4|Os03g27040.1  
AT1G63440  
AT5G21930 Orysa4|Os03g08070.1  
AT4G33520 Orysa4|Os08g37950.1  
AT4G37270 Orysa4|Os06g47550.1  
Orysa4|Os04g46940.1  
Orysa4|Os02g10290.1  
AT1G13300,AT3G25790,AT1G68670,AT1G25550 Orysa4|Os02g22020.1

AT4G37180,AT1G49560 Orysa4|Os07g02800.1,Orysa4|Os03g55590.1,Orysa4|Os12g39640.1  
AT2G03500  
AT3G51980 Orysa4|Os09g33780.1  
AT4G38060,AT5G65480 Orysa4|Os09g20930.1,Orysa4|Os08g31940.1  
AT1G11780Orysa4|Os11g29690.1  
AT2G47630,AT3G62860  
Orysa4|Os01g21310.1  
Orysa4|Os01g62010.1  
AT5G19290,AT5G14980 Orysa4|Os01g21580.1,Orysa4|Os01g21520.1,Orysa4|Os01g21560.1  
Orysa4|Os01g21300.1,Orysa4|Os05g29974.1  
AT1G11090Orysa4|Os07g37840.1  
AT5G16120 Orysa4|Os10g04620.1  
AT2G39410,AT2G39420,AT3G55180,AT2G39400,AT3G55190 Orysa4|Os11g01040.1,Orysa4|Os12g16180.1  
AT1G52760 Orysa4|Os02g11720.1  
AT1G77420  
AT1G77122 Orysa4|Os04g35760.1  
AT1G69210 Orysa4|Os07g06090.1  
Orysa4|Os07g36940.1  
AT4G30680,AT1G62410,AT2G24050,AT5G57870 Orysa4|Os02g39840.1  
AT3G60240  
Orysa4|Os06g32730.1,Orysa4|Os06g32860.1  
AT1G29395,AT1G29390 Orysa4|Os05g49170.1  
AT3G10550,AT5G04540 Orysa4|Os08g44260.1  
AT3G50220,AT5G67210,AT2G15440  
Orysa4|Os02g06380.1,Orysa4|Os06g47310.1,Orysa4|Os04g55640.1,Orysa4|Os05g37530.1  
AT2G17900 Orysa4|Os03g49730.1  
AT3G17120,AT4G01960,AT1G02380 Orysa4|Os01g19410.1,Orysa4|Os05g04150.1  
AT5G08750,AT5G63780 Orysa4|Os04g59580.1  
Orysa4|Os02g03310.1  
Orysa4|Os10g27470.1  
AT4G26000 Orysa4|Os10g41440.1  
AT3G04610 Orysa4|Os12g40560.1,Orysa4|Os03g42900.1  
AT1G19010,AT1G74860 Orysa4|Os02g37020.1  
AT5G04040,AT3G57140 Orysa4|Os03g59620.1  
AT2G20330 Orysa4|Os10g32710.1  
AT3G27320,AT5G14310  
Orysa4|Os12g15400.1  
Orysa4|Os01g67600.1  
AT1G10030 Orysa4|Os12g43670.1  
AT3G55200,AT3G55220 Orysa4|Os02g04480.1  
AT2G28450  
Orysa4|Os04g01480.1  
AT2G01460 Orysa4|Os04g21110.1  
AT3G04860,AT5G28150  
AT4G12690,AT2G04220,AT5G48270,AT3G13229 Orysa4|Os02g10530.1  
Orysa4|Os03g59200.1  
Orysa4|Os07g38460.1  
AT5G11000,AT2G25200  
Orysa4|Os01g68140.1  
Orysa4|Os05g01790.1  
AT2G27770,AT2G36470  
Orysa4|Os08g34120.1,Orysa4|Os09g24970.1,Orysa4|Os04g39340.1,Orysa4|Os02g33100.1,Orysa4|Os02g10670.1,Orysa4|Os06g08350.1,Orysa4|Os04g33350.1,Orysa4|Os11g05280.1,Orysa4|Os08g44310.1,Orysa4|Os09g39370.1,Orysa4|Os03g53380.1  
AT3G04120,AT1G13440  
Orysa4|Os02g38920.1  
AT1G16300,AT1G79530 Orysa4|Os06g45590.1,Orysa4|Os02g07490.1  
AT5G16460  
AT2G34380,AT1G29760 Orysa4|Os09g36360.1  
Orysa4|Os12g05330.1  
AT1G62130,AT4G24860  
AT4G28000,AT1G64110 Orysa4|Os05g50750.1  
Orysa4|Os01g43480.1  
AT3G19740,AT1G50140 Orysa4|Os06g12160.1,Orysa4|Os02g51400.1  
AT4G02480,AT1G02890 Orysa4|Os11g43970.1  
Orysa4|Os07g47530.1,Orysa4|Os03g22420.1  
AT1G36380 Orysa4|Os02g34730.1  
AT2G21350,AT4G39040 Orysa4|Os10g36860.1  
AT5G50200,AT4G24720 Orysa4|Os02g38230.1  
AT2G14660 Orysa4|Os05g34590.1,Orysa4|Os08g37860.1,Orysa4|Os03g47260.1  
AT3G59680 Orysa4|Os01g29860.1  
AT4G21010,AT4G20330 Orysa4|Os03g07930.1,Orysa4|Os10g25770.1  
AT1G25375 Orysa4|Os01g04200.1  
AT5G07880  
AT1G13890,AT5G61210 Orysa4|Os03g11380.1,Orysa4|Os02g24080.1,Orysa4|Os02g32740.1  
AT5G58220  
Orysa4|Os03g27320.1  
AT5G54290 Orysa4|Os11g04500.1  
AT4G01800 Orysa4|Os01g21820.1  
Orysa4|Os01g21790.1  
Orysa4|Os05g34880.1  
AT1G21650 Orysa4|Os11g08980.1



AT4G15030 Orysa4|Os11g42000.1  
AT5G49800 Orysa4|Os11g14070.1  
AT5G57440,AT4G25840 Orysa4|Os08g14580.1  
AT2G39930 Orysa4|Os08g40930.1  
Orysa4|Os05g08110.1  
Orysa4|Os09g29404.1  
AT4G09020 Orysa4|Os05g32710.1  
AT1G03310  
AT1G27150,AT1G27110 Orysa4|Os03g48380.1  
AT4G37670,AT2G22910 Orysa4|Os07g39690.1  
Orysa4|Os07g25410.1  
Orysa4|Os07g05300.1  
AT1G13270,AT3G25740 Orysa4|Os04g52100.1  
AT2G45240 Orysa4|Os10g36470.1  
AT4G37040 Orysa4|Os02g52420.1  
AT3G55850 Orysa4|Os01g72350.1  
AT4G23890 Orysa4|Os07g09800.1  
AT2G20360 Orysa4|Os02g57180.1  
AT1G52870,AT4G03410  
Orysa4|Os03g38730.1  
AT2G46090 Orysa4|Os03g03400.1  
AT2G42310,AT3G57785 Orysa4|Os08g39480.1,Orysa4|Os09g31260.1  
Orysa4|Os03g47380.1  
AT4G02720 Orysa4|Os09g28220.1  
Orysa4|Os08g36750.1  
AT1G05440 Orysa4|Os03g53580.1  
AT1G54740 Orysa4|Os11g42410.1  
AT1G59660,AT1G10390 Orysa4|Os12g06870.1,Orysa4|Os12g06890.1  
AT1G63540,AT1G63530  
Orysa4|Os01g28690.1  
AT5G05980,AT3G55630 Orysa4|Os10g35940.1,Orysa4|Os03g02030.1  
AT3G10160  
AT1G26520 Orysa4|Os07g40790.1  
Orysa4|Os04g51100.1  
Orysa4|Os07g40404.1  
AT1G80480,AT1G15730 Orysa4|Os02g55630.1  
AT4G33160 Orysa4|Os07g42590.1,Orysa4|Os03g28130.1  
Orysa4|Os07g48390.1  
AT5G60800,AT2G28090,AT5G03380,AT2G36950 Orysa4|Os10g30450.1  
AT3G02960  
Orysa4|Os10g14870.1  
AT5G24580,AT5G50730  
Orysa4|Os07g20340.1  
AT3G21490  
AT5G63530,AT5G50740 Orysa4|Os04g32030.1,Orysa4|Os02g30650.1  
AT1G29000  
AT1G03320 Orysa4|Os02g57350.1  
AT3G11250,AT3G09200,AT2G40010 Orysa4|Os12g03880.1,Orysa4|Os11g04070.1,Orysa4|Os08g03640.1  
AT1G73875,AT3G18500,AT5G11350  
AT3G58560,AT3G58580 Orysa4|Os03g07080.1,Orysa4|Os10g27230.1  
AT1G31500 Orysa4|Os05g32330.1  
AT1G31530  
Orysa4|Os06g15410.1  
Orysa4|Os01g42490.1  
AT5G07020 Orysa4|Os02g35090.1  
AT2G28310,AT1G08040 Orysa4|Os01g68260.1,Orysa4|Os02g19510.1,Orysa4|Os01g73970.1  
Orysa4|Os07g23190.1,Orysa4|Os01g69050.1  
AT4G18530  
AT1G61240,AT1G11170 Orysa4|Os07g37760.1  
AT4G12840  
AT3G26440,AT1G13000,AT3G27470,AT1G67850,AT1G24570  
Orysa4|Os06g51190.1,Orysa4|Os06g51200.1,Orysa4|Os06g51180.1  
Orysa4|Os07g18550.1  
AT3G54970 Orysa4|Os02g15360.1  
AT3G54650 Orysa4|Os12g40860.1,Orysa4|Os03g43390.1  
AT4G31150 Orysa4|Os06g45330.1  
Orysa4|Os01g46980.1  
Orysa4|Os01g12260.1  
AT1G64200,AT4G11150,AT3G08560  
AT5G22010 Orysa4|Os11g36390.1  
AT5G43500  
Orysa4|Os04g09860.1  
AT4G16155,AT3G16950 Orysa4|Os05g06460.1,Orysa4|Os01g23610.1  
AT5G42610,AT4G36820,AT2G23790,AT5G66650  
Orysa4|Os06g09260.1,Orysa4|Os10g35770.1,Orysa4|Os03g13050.1  
AT3G50560 Orysa4|Os08g37130.1  
AT4G26230,AT5G56710,AT2G19740 Orysa4|Os06g21480.1,Orysa4|Os02g48660.1  
AT1G30910,AT5G44720 Orysa4|Os09g38777.1  
AT3G28970 Orysa4|Os07g43720.1  
AT5G14910 Orysa4|Os05g27100.1  
AT5G63880,AT5G09260 Orysa4|Os02g38300.1

Orysa4|Os11g36460.1  
AT5G15920 Orysa4|Os05g51790.1  
AT1G69320,AT1G26600 Orysa4|Os01g55850.1,Orysa4|Os05g43660.1  
AT2G16570,AT4G34740,AT4G38880  
Orysa4|Os01g65260.1  
Orysa4|Os06g39440.1  
Orysa4|Os01g68770.1  
AT4G14040,AT4G14030,AT3G23800  
Orysa4|Os01g61290.1  
AT3G02090  
Orysa4|Os01g51390.1  
AT4G25120 Orysa4|Os07g30980.1  
AT2G15560 Orysa4|Os08g13390.1  
AT2G38020 Orysa4|Os01g47650.1  
AT2G35760,AT4G16442 Orysa4|Os03g10030.1  
AT4G25830 Orysa4|Os02g08110.1,Orysa4|Os06g44610.1  
AT1G61780  
Orysa4|Os08g09180.1  
AT4G18905,AT4G18900,AT4G35370 Orysa4|Os06g30680.1,Orysa4|Os01g69970.1  
AT2G42780 Orysa4|Os08g07280.1  
AT1G79690  
Orysa4|Os02g55030.1  
AT4G14590 Orysa4|Os11g07030.1  
AT5G06430 Orysa4|Os01g66310.1,Orysa4|Os11g38590.1,Orysa4|Os11g38450.1,Orysa4|Os11g38040.1  
Orysa4|Os09g16910.1  
AT5G65720  
AT2G32520 Orysa4|Os01g34700.1  
AT1G48200 Orysa4|Os06g05670.1  
AT5G57610  
AT1G04700  
AT3G24720 Orysa4|Os03g28300.1  
Orysa4|Os02g54510.1  
Orysa4|Os06g08280.1  
AT2G35050  
Orysa4|Os07g25680.1  
AT3G46920 Orysa4|Os06g43840.1  
AT1G16270,AT1G79570  
AT4G26170,AT5G56770,AT5G56780 Orysa4|Os07g39800.1  
AT1G02700,AT4G02140 Orysa4|Os07g47840.1  
AT1G47420 Orysa4|Os04g34100.1  
AT1G56310 Orysa4|Os05g28860.1  
AT1G76340 Orysa4|Os03g11590.1,Orysa4|Os02g06010.1  
AT5G19980 Orysa4|Os08g10350.1  
AT1G36550 Orysa4|Os08g19290.1  
Orysa4|Os01g61830.1  
AT2G20280  
Orysa4|Os02g18750.1,Orysa4|Os02g18690.1,Orysa4|Os09g30320.1,Orysa4|Os08g38810.1  
AT1G49320 Orysa4|Os06g17000.1,Orysa4|Os06g19800.1,Orysa4|Os06g13240.1  
AT5G25610  
Orysa4|Os05g12410.1,Orysa4|Os05g12640.1,Orysa4|Os05g12630.1,Orysa4|Os05g12400.1,Orysa4|Os05g13490.1,Orysa4|Os04g14990.1  
Orysa4|Os03g47780.1  
AT2G22040,AT3G18140  
AT1G07960 Orysa4|Os03g17860.1  
AT2G47470 Orysa4|Os01g23740.1  
AT1G33140,AT1G33120,AT4G10450 Orysa4|Os09g31180.1,Orysa4|Os02g01332.1  
AT3G03150 Orysa4|Os04g50970.1  
AT5G06140 Orysa4|Os01g64280.1  
AT1G29630  
AT1G18090  
AT2G02550  
Orysa4|Os01g56940.1  
AT3G51790 Orysa4|Os10g39870.1  
AT1G30880 Orysa4|Os04g52180.1  
AT3G47850 Orysa4|Os05g13390.1  
AT3G13940 Orysa4|Os11g40090.1  
AT5G13560,AT2G37370 Orysa4|Os01g06270.1,Orysa4|Os05g06980.1,Orysa4|Os03g17270.1  
Orysa4|Os10g25020.1,Orysa4|Os10g25030.1  
AT4G37000  
AT5G23720 Orysa4|Os01g24470.1  
AT3G06110  
Orysa4|Os01g20940.1  
AT3G23610 Orysa4|Os01g29469.1  
AT4G34310 Orysa4|Os03g08700.1  
AT2G40360 Orysa4|Os07g25440.1  
AT5G13630 Orysa4|Os07g46310.1,Orysa4|Os03g20700.1  
AT4G27490 Orysa4|Os08g02360.1,Orysa4|Os03g62720.1  
Orysa4|Os01g46600.1  
AT2G21820 Orysa4|Os08g29600.1  
AT5G13750,AT5G13740,AT3G43790 Orysa4|Os01g16260.1  
Orysa4|Os12g03899.1,Orysa4|Os11g04104.1,Orysa4|Os11g04030.1,Orysa4|Os12g03860.1,Orysa4|Os12g03830.1,Orysa4|Os11g04020.1,Orysa4|Os12g03870.1,Orysa4|Os11g04060.1

Orysa4|Os12g03950.1,Orysa4|Os07g08310.1  
AT5G61510 Orysa4|Os10g41170.1,Orysa4|Os03g01190.1  
AT4G21580 Orysa4|Os06g27920.1  
AT1G73760,AT1G17970 Orysa4|Os01g49770.1,Orysa4|Os05g47670.1  
Orysa4|Os09g35690.1,Orysa4|Os04g48260.1  
AT3G63530 Orysa4|Os03g07790.1  
AT1G53190,AT3G15070 Orysa4|Os05g48970.1,Orysa4|Os01g47740.1  
AT3G19910 Orysa4|Os08g43480.1  
Orysa4|Os04g51400.1,Orysa4|Os08g14320.1  
AT5G10650,AT5G24870,AT4G31450  
Orysa4|Os06g48040.1,Orysa4|Os02g05692.1  
AT3G47180  
AT5G52150  
AT2G37150 Orysa4|Os05g07070.1,Orysa4|Os01g06590.1  
AT4G35870 Orysa4|Os03g04450.1  
AT1G72020 Orysa4|Os04g35300.1  
Orysa4|Os04g56210.1,Orysa4|Os04g56230.1  
AT5G47770,AT4G17190 Orysa4|Os01g50050.1,Orysa4|Os01g50760.1  
AT3G59280,AT5G61880 Orysa4|Os10g33910.1  
AT1G64080 Orysa4|Os01g12640.1  
AT3G54170 Orysa4|Os06g27970.1  
AT1G22850 Orysa4|Os01g66170.1  
AT1G44478 Orysa4|Os06g45900.1,Orysa4|Os06g45910.1  
AT1G53720  
AT5G49550 Orysa4|Os02g09780.1  
AT1G60200 Orysa4|Os08g32100.1  
AT3G48910,AT3G48900 Orysa4|Os08g01130.1  
AT1G33810 Orysa4|Os08g02060.1  
Orysa4|Os07g46680.1  
AT1G76010,AT1G20220  
Orysa4|Os09g37006.1  
AT1G72080 Orysa4|Os01g55000.1  
Orysa4|Os04g34940.1  
Orysa4|Os03g52490.1,Orysa4|Os03g06980.1  
Orysa4|Os11g23220.1  
Orysa4|Os02g57190.1  
AT1G50360,AT3G19960 Orysa4|Os10g34710.1  
Orysa4|Os07g37560.1  
AT4G28715  
Orysa4|Os10g25560.1  
AT3G58160  
AT4G28710  
Orysa4|Os02g53740.1,Orysa4|Os10g19860.1,Orysa4|Os10g19342.1  
AT4G27370,AT5G54280  
AT5G20470  
AT5G20450 Orysa4|Os02g06510.1  
AT1G42680  
AT5G20490,AT1G17580  
AT4G33200  
Orysa4|Os05g46030.1,Orysa4|Os01g51630.1  
AT1G08730,AT1G54560 Orysa4|Os06g29350.1  
AT1G04600,AT2G33240,AT1G04160,AT5G43900,AT2G20290 Orysa4|Os02g34080.1  
Orysa4|Os01g40200.1  
Orysa4|Os03g48140.1  
AT2G31900 Orysa4|Os03g53660.1  
AT5G22400  
Orysa4|Os12g05900.1,Orysa4|Os11g05540.1,Orysa4|Os01g73630.1  
AT4G03100  
Orysa4|Os12g34840.1  
AT2G46710 Orysa4|Os04g48790.1,Orysa4|Os02g45600.1  
AT2G27440,AT1G08340  
AT3G11490  
AT1G72320 Orysa4|Os10g25110.1  
AT2G46240 Orysa4|Os02g15930.1  
AT1G12060 Orysa4|Os01g50430.1,Orysa4|Os11g31060.1,Orysa4|Os02g48780.1  
AT3G12680 Orysa4|Os01g42970.1  
AT5G16540,AT3G02830 Orysa4|Os01g68860.1  
Orysa4|Os12g18120.1  
AT2G32930,AT1G04990  
AT5G18550,AT3G06410,AT2G47850 Orysa4|Os01g15460.1,Orysa4|Os01g15350.1  
AT1G29600 Orysa4|Os12g03554.1  
Orysa4|Os12g21700.1,Orysa4|Os11g28270.1  
Orysa4|Os06g32720.1  
AT5G63260,AT3G48440,AT1G48195  
AT3G24100,AT4G13615 Orysa4|Os05g33700.1  
AT1G61120 Orysa4|Os02g36210.1,Orysa4|Os04g09900.1  
AT4G02780 Orysa4|Os02g17780.1  
Orysa4|Os09g15050.1  
AT4G21810,AT4G04860 Orysa4|Os03g63520.1  
Orysa4|Os05g09550.1  
Orysa4|Os02g13900.1,Orysa4|Os06g35900.1  
Orysa4|Os01g08180.1

AT4G18890,AT1G78700 Orysa4|Os01g10610.1  
AT1G19350,AT1G75080 Orysa4|Os07g39220.1  
AT3G50750  
AT4G36780  
Orysa4|Os03g04740.1,Orysa4|Os10g32850.1  
AT4G28690,AT2G20310 Orysa4|Os10g42270.1  
AT5G20935 Orysa4|Os07g06990.1  
AT5G35910,AT1G54440 Orysa4|Os10g30100.1  
AT5G25080 Orysa4|Os08g16880.1  
AT1G18130,AT5G26830,AT1G17960  
Orysa4|Os08g19850.1  
AT2G04842 Orysa4|Os02g33500.1  
Orysa4|Os11g42100.1,Orysa4|Os04g41380.1,Orysa4|Os11g42060.1,Orysa4|Os05g50790.1,Orysa4|Os03  
g40250.1,Orysa4|Os01g72410.1  
Orysa4|Os01g58520.1  
AT5G45500 Orysa4|Os02g34490.1  
AT2G37195 Orysa4|Os02g56190.1  
Orysa4|Os03g55310.1  
AT1G49520,AT3G19080  
AT4G26810 Orysa4|Os09g04720.1  
AT4G34290,AT2G14880  
Orysa4|Os03g55570.1  
AT3G48600,AT1G31760,AT3G03590,AT2G35605 Orysa4|Os02g03730.1  
AT2G14260 Orysa4|Os05g43830.1  
Orysa4|Os06g13180.1,Orysa4|Os02g50730.1  
AT1G70170,AT1G24140,AT1G59970  
AT2G45040,AT4G16640 Orysa4|Os10g40830.1  
Orysa4|Os10g40859.1  
AT5G41410 Orysa4|Os06g01934.1  
Orysa4|Os10g39030.1,Orysa4|Os03g03260.1  
AT2G27990  
AT2G35940,AT2G27220 Orysa4|Os12g06340.1,Orysa4|Os11g06020.1  
Orysa4|Os03g47730.1  
AT4G34610,AT2G16400 Orysa4|Os12g43950.1,Orysa4|Os03g47740.1,Orysa4|Os03g06930.1  
AT4G32980  
Orysa4|Os01g62920.1,Orysa4|Os05g38120.1  
AT1G75410,AT1G19700,AT1G75430  
AT2G23760,AT4G36870 Orysa4|Os03g52239.1  
AT5G02030  
Orysa4|Os06g36680.1  
Orysa4|Os02g13310.1  
AT3G17205 Orysa4|Os05g06690.1  
AT1G55860,AT1G70320  
Orysa4|Os09g07900.1  
Orysa4|Os12g24080.1  
AT4G34200,AT3G19480 Orysa4|Os04g55720.1  
AT1G72190  
AT1G17745  
Orysa4|Os06g44460.1,Orysa4|Os08g34720.1  
AT4G02120 Orysa4|Os12g36950.1  
AT3G12670,AT2G34890,AT1G30820,AT4G20320  
Orysa4|Os05g49460.1,Orysa4|Os01g43020.1,Orysa4|Os05g49770.1,Orysa4|Os01g46570.1  
AT4G14815,AT3G22600,AT2G48130 Orysa4|Os07g07930.1  
Orysa4|Os07g07860.1,Orysa4|Os07g07790.1,Orysa4|Os03g57990.1,Orysa4|Os07g07870.1  
Orysa4|Os04g38840.1  
AT1G03103  
AT5G13900 Orysa4|Os11g37280.1,Orysa4|Os03g20760.1,Orysa4|Os06g23360.1,Orysa4|Os03g46180.1,Orysa4|Os03  
g46150.1  
AT2G27130 Orysa4|Os05g41030.1,Orysa4|Os01g59870.1  
AT3G43720  
AT3G22570,AT3G22580  
AT3G22620,AT1G05450,AT2G48140 Orysa4|Os07g07920.1,Orysa4|Os03g57980.1  
AT1G27950 Orysa4|Os08g42040.1  
AT2G13820,AT5G64080,AT5G09370,AT1G36150,AT4G08670  
Orysa4|Os11g37320.1  
Orysa4|Os03g26800.1,Orysa4|Os03g26820.1,Orysa4|Os07g43290.1,Orysa4|Os07g30590.1  
Orysa4|Os03g30800.1  
AT3G16700,AT4G15940 Orysa4|Os03g61330.1  
AT5G22860,AT3G28680  
AT2G24280 Orysa4|Os06g43930.1  
AT5G65760 Orysa4|Os01g56150.1  
AT1G09430  
Orysa4|Os11g47120.1,Orysa4|Os11g47330.1,Orysa4|Os12g37870.1  
AT1G10670,AT1G60810  
AT1G16445  
Orysa4|Os05g43582.1  
AT3G29310 Orysa4|Os05g43670.1  
AT5G54770 Orysa4|Os07g34570.1  
AT2G30620,AT1G06760 Orysa4|Os07g08710.1,Orysa4|Os03g58470.1  
AT2G18050 Orysa4|Os06g04020.1,Orysa4|Os04g18090.1  
AT5G15802 Orysa4|Os03g30092.1

Orysa4|Os02g14090.1  
Orysa4|Os07g46740.1  
AT1G30700,AT4G20830,AT4G20840,AT1G11770,AT1G01980,AT1G30740,AT1G26410,AT1G26420,AT1G26390,AT1G26400,AT1G26380,AT4G20800,AT1G30710,AT1G34575,AT2G34810,AT1G30720,AT1G30730  
Orysa4|Os08g06190.1  
AT5G44390,AT5G44400,AT5G44380,AT2G34790,AT1G30760  
Orysa4|Os05g21140.1,Orysa4|Os01g18230.1,Orysa4|Os01g42990.1  
AT5G44360,AT4G20860,AT5G44410,AT5G44440,AT4G20820  
Orysa4|Os05g48440.1,Orysa4|Os05g48480.1,Orysa4|Os05g28490.1,Orysa4|Os06g35560.1  
Orysa4|Os08g06180.1,Orysa4|Os08g06170.1,Orysa4|Os08g25490.1  
Orysa4|Os06g35630.1,Orysa4|Os06g35650.1,Orysa4|Os06g35700.1,Orysa4|Os11g30310.1,Orysa4|Os06g35590.1,Orysa4|Os06g35660.1  
Orysa4|Os10g21690.1  
AT5G57420 Orysa4|Os04g55950.1  
AT1G67025,AT1G18380 Orysa4|Os05g47750.1  
AT1G77750  
Orysa4|Os03g49710.1  
AT5G14320  
AT5G55860 Orysa4|Os12g17310.1  
AT2G26570,AT4G33390,AT1G45545,AT5G42880 Orysa4|Os07g42700.1,Orysa4|Os03g27800.1  
Orysa4|Os01g49740.1  
AT1G12150,AT4G17210  
Orysa4|Os06g20860.1  
AT3G13190  
Orysa4|Os03g01930.1,Orysa4|Os09g28450.1  
AT3G12120 Orysa4|Os07g23410.1,Orysa4|Os02g48560.1,Orysa4|Os07g23430.1  
AT2G29980,AT3G11170,AT5G05580 Orysa4|Os11g01340.1,Orysa4|Os12g01370.1,Orysa4|Os03g18070.1  
AT5G57140 Orysa4|Os06g48570.1  
Orysa4|Os09g36290.1  
AT2G46880,AT5G63140  
AT2G42490  
Orysa4|Os02g37990.1,Orysa4|Os04g04950.1,Orysa4|Os04g40040.1  
Orysa4|Os02g38010.1  
AT4G37120,AT1G65660,AT3G45950  
Orysa4|Os08g03390.1  
AT3G52430 Orysa4|Os11g09010.1  
AT5G03900 Orysa4|Os02g33010.1  
Orysa4|Os12g39920.1  
Orysa4|Os12g38460.1,Orysa4|Os12g39700.1  
AT3G28880  
AT3G04710  
Orysa4|Os12g40770.1,Orysa4|Os12g40780.1,Orysa4|Os09g03630.1,Orysa4|Os09g03680.1,Orysa4|Os09g03750.1,Orysa4|Os02g29210.1,Orysa4|Os02g29190.1,Orysa4|Os08g23590.1,Orysa4|Os03g42350.1,Orysa4|Os08g13640.1,Orysa4|Os02g29130.1,Orysa4|Os02g29040.1,Orysa4|Os02g29140.1,Orysa4|Os02g29160.1,Orysa4|Os12g43840.1,Orysa4|Os12g43940.1,Orysa4|Os01g09410.1,Orysa4|Os02g29110.1,Orysa4|Os02g29100.1,Orysa4|Os01g07980.1,Orysa4|Os01g09370.1,Orysa4|Os01g07640.1,Orysa4|Os03g47640.1,Orysa4|Os03g47620.1,Orysa4|Os03g47650.1,Orysa4|Os03g47686.1,Orysa4|Os03g47670.1,Orysa4|Os03g47720.1,Orysa4|Os05g01310.1  
AT5G14970,AT2G14910 Orysa4|Os12g39200.1  
AT1G65840 Orysa4|Os04g57550.1,Orysa4|Os04g57560.1  
AT3G59050,AT2G43020 Orysa4|Os04g53190.1  
AT1G52155 Orysa4|Os11g27800.1,Orysa4|Os01g48570.1  
AT2G45280 Orysa4|Os01g39630.1  
AT3G15470,AT5G54200 Orysa4|Os04g58180.1,Orysa4|Os02g42590.1  
Orysa4|Os11g08400.1  
Orysa4|Os04g44700.1  
AT5G53500,AT5G24320,AT1G64610,AT5G42010 Orysa4|Os03g02440.1,Orysa4|Os04g48010.1  
AT1G48870 Orysa4|Os02g33630.1,Orysa4|Os04g34080.1  
AT2G37670,AT5G02430  
AT5G17210  
Orysa4|Os02g39510.1  
Orysa4|Os05g35930.1,Orysa4|Os05g35910.1,Orysa4|Os05g35800.1,Orysa4|Os05g35810.1,Orysa4|Os05g35830.1,Orysa4|Os05g35820.1,Orysa4|Os05g35960.1  
Orysa4|Os06g02440.1  
AT3G09630,AT5G02870 Orysa4|Os07g08330.1  
AT5G22580 Orysa4|Os11g05290.1  
AT4G21110 Orysa4|Os01g63890.1,Orysa4|Os04g55290.1,Orysa4|Os05g37390.1,Orysa4|Os12g05410.1  
AT1G64770 Orysa4|Os03g06230.1  
AT4G32770 Orysa4|Os02g17650.1  
AT3G13882 Orysa4|Os01g39010.1  
AT5G67570 Orysa4|Os05g25060.1  
AT1G30610 Orysa4|Os01g48380.1  
AT4G26020 Orysa4|Os02g05520.1  
Orysa4|Os05g44380.1,Orysa4|Os01g10350.1  
AT3G16310  
AT1G63780 Orysa4|Os08g05880.1  
AT5G16620 Orysa4|Os04g35900.1  
AT2G18910 Orysa4|Os02g26370.1  
AT2G46420,AT3G61700 Orysa4|Os05g12170.1,Orysa4|Os01g12080.1  
AT5G02580 Orysa4|Os05g38680.1  
AT5G04090,AT3G10250 Orysa4|Os06g49180.1,Orysa4|Os02g04450.1  
AT3G28990,AT3G55240  
Orysa4|Os03g17200.1

AT1G15240 Orysa4|Os05g50660.1  
AT2G15900 Orysa4|Os11g06040.1  
Orysa4|Os01g52170.1  
AT3G24430  
AT4G19540 Orysa4|Os03g42880.1  
Orysa4|Os05g25550.1  
AT5G62670,AT3G47950 Orysa4|Os03g48310.1,Orysa4|Os12g44150.1,Orysa4|Os07g09340.1  
AT1G17260 Orysa4|Os03g08560.1  
AT2G07560,AT3G42640 Orysa4|Os02g55400.1  
Orysa4|Os11g29750.1,Orysa4|Os11g29490.1,Orysa4|Os03g01670.1,Orysa4|Os02g57920.1  
AT3G60330 Orysa4|Os03g01120.1  
AT4G11730  
AT2G18960,AT4G30190,AT5G57350,AT2G24520  
AT1G80660  
AT5G46560 Orysa4|Os03g01016.2  
AT1G56230  
Orysa4|Os01g24480.1  
AT5G64630 Orysa4|Os08g01680.1  
Orysa4|Os05g15530.1  
AT5G57850  
Orysa4|Os02g17330.1  
Orysa4|Os07g09790.1  
AT3G42860 Orysa4|Os06g10400.1,Orysa4|Os03g57260.1  
AT2G01440 Orysa4|Os02g48100.1  
AT4G08455 Orysa4|Os07g15490.1  
AT1G01210,AT4G07950 Orysa4|Os02g45120.1  
AT3G27890 Orysa4|Os01g72460.1,Orysa4|Os01g72430.1  
AT2G27050,AT3G20770  
AT5G65100,AT5G10120 Orysa4|Os04g38400.1,Orysa4|Os02g36510.1  
AT1G73730 Orysa4|Os08g39830.1,Orysa4|Os09g31400.1  
AT5G21120  
Orysa4|Os03g20790.1,Orysa4|Os03g20780.1,Orysa4|Os07g48630.1  
Orysa4|Os07g17160.1  
AT1G18700 Orysa4|Os07g43870.1  
Orysa4|Os01g53720.1  
Orysa4|Os09g23060.1,Orysa4|Os09g22000.1  
Orysa4|Os02g13360.1  
AT2G25870  
AT1G74530  
Orysa4|Os07g27980.1  
Orysa4|Os08g07430.1  
AT3G26900  
AT2G21940,AT4G39540 Orysa4|Os06g12150.1,Orysa4|Os04g54800.1  
AT1G77400,AT1G21695 Orysa4|Os11g07950.1,Orysa4|Os03g62330.1  
AT2G21620 Orysa4|Os02g47650.1  
AT2G17550 Orysa4|Os03g03860.1  
Orysa4|Os01g52180.1  
Orysa4|Os07g34420.1,Orysa4|Os07g34440.1,Orysa4|Os07g34400.1  
AT5G24220,AT5G24180,AT5G24190,AT5G24210,AT5G24200,AT5G24230  
AT4G10955,AT2G05260 Orysa4|Os02g18480.1  
AT4G04980,AT1G11070 Orysa4|Os07g15100.1  
AT1G07120 Orysa4|Os03g18300.1  
AT3G25690 Orysa4|Os12g01449.1  
AT4G18570 Orysa4|Os01g46340.1,Orysa4|Os05g49820.1  
Orysa4|Os08g03560.1  
AT1G48280  
AT5G63920 Orysa4|Os03g06900.1  
AT2G32000  
Orysa4|Os09g32450.1  
AT5G39410 Orysa4|Os07g40620.1  
AT2G30350 Orysa4|Os07g12710.1  
Orysa4|Os07g04950.1,Orysa4|Os07g04930.1,Orysa4|Os07g04960.1,Orysa4|Os03g56944.1,Orysa4|Os03g56940.1,Orysa4|Os03g56930.1  
AT2G22510,AT4G38080 Orysa4|Os08g37300.1  
AT5G09520,AT5G09530 Orysa4|Os07g40870.1,Orysa4|Os07g40890.1,Orysa4|Os07g40830.1  
AT3G52490 Orysa4|Os01g45630.1,Orysa4|Os02g33460.1,Orysa4|Os04g33980.1,Orysa4|Os11g05820.1  
AT4G29920,AT5G57130 Orysa4|Os02g26600.1,Orysa4|Os04g23220.1  
AT5G42765 Orysa4|Os03g56320.1  
AT5G36210 Orysa4|Os06g11190.1,Orysa4|Os06g11180.1  
AT4G16580  
AT4G33500 Orysa4|Os03g09220.1  
AT5G66720  
Orysa4|Os02g42250.1,Orysa4|Os02g42270.1  
AT2G30170 Orysa4|Os01g07090.1  
AT5G04610 Orysa4|Os08g40890.1  
Orysa4|Os04g01240.1  
AT2G31140,AT1G06200  
AT4G15510 Orysa4|Os12g37710.1,Orysa4|Os07g17390.1  
AT1G01860 Orysa4|Os02g03050.1  
AT3G48930,AT5G23740,AT4G30800  
Orysa4|Os07g37770.1,Orysa4|Os04g52354.1,Orysa4|Os04g42380.1,Orysa4|Os08g10608.1  
AT5G42390 Orysa4|Os06g41990.1

AT4G39450 Orysa4|Os01g08750.1  
AT1G13400,AT1G68480 Orysa4|Os01g03840.1  
AT4G32350,AT1G79910,AT1G52315 Orysa4|Os06g47250.1,Orysa4|Os02g06430.1  
AT3G54826 Orysa4|Os02g57430.1  
AT5G49210 Orysa4|Os12g05170.1,Orysa4|Os11g05120.1  
AT1G52570,AT3G15730 Orysa4|Os05g07880.1,Orysa4|Os01g07760.1  
Orysa4|Os02g02790.1  
Orysa4|Os06g40180.1,Orysa4|Os06g40170.1,Orysa4|Os06g40190.1  
Orysa4|Os09g37100.1  
AT1G55180  
AT5G25370  
AT4G00240,AT2G42010,AT4G11850,AT4G11840,AT4G11830 Orysa4|Os03g02740.1,Orysa4|Os10g38060.1  
AT4G35790 Orysa4|Os03g62410.1,Orysa4|Os07g15680.1  
Orysa4|Os06g09610.1  
AT3G26060  
AT1G33520,AT4G25020 Orysa4|Os01g01140.1,Orysa4|Os03g14860.1  
AT1G73170  
AT3G10420 Orysa4|Os07g08970.1  
AT1G33290 Orysa4|Os06g06190.1  
AT1G20225,AT1G76020 Orysa4|Os09g37020.1  
Orysa4|Os04g15690.1  
Orysa4|Os04g31040.1  
AT1G08550  
AT5G61150 Orysa4|Os03g54930.1,Orysa4|Os12g38970.1  
AT1G78060 Orysa4|Os11g18730.1,Orysa4|Os11g19210.1,Orysa4|Os11g19160.1,Orysa4|Os11g18690.1,Orysa4|Os02  
g51620.1  
AT5G09700,AT5G09730,AT5G64570 Orysa4|Os04g54810.1  
AT3G19620 Orysa4|Os11g47350.1,Orysa4|Os01g19220.1  
AT5G49360,AT1G02640 Orysa4|Os11g44950.1  
AT5G10560 Orysa4|Os04g44840.1  
AT3G59490 Orysa4|Os09g33992.1  
AT1G18335 Orysa4|Os02g53260.1  
AT5G61200 Orysa4|Os07g40770.1  
AT5G01290,AT3G09100,AT5G28210 Orysa4|Os11g11070.1,Orysa4|Os12g09120.1  
AT4G18230 Orysa4|Os03g30934.1  
AT4G31330,AT5G10580,AT5G24790  
AT5G46060  
AT5G24600 Orysa4|Os08g05770.1,Orysa4|Os02g19060.1  
AT3G18215  
AT5G43180 Orysa4|Os01g49030.1  
Orysa4|Os09g15780.1,Orysa4|Os08g28970.1  
AT4G37230  
AT3G50820,AT5G66570 Orysa4|Os01g31690.1  
AT3G56940 Orysa4|Os01g17170.1  
AT3G05350 Orysa4|Os07g10540.1  
AT4G36760 Orysa4|Os06g45360.1,Orysa4|Os11g33330.1,Orysa4|Os11g33340.1  
AT4G20030  
AT5G59860  
AT3G20930 Orysa4|Os02g49820.1  
Orysa4|Os05g24130.1  
AT2G16980,AT2G16970,AT2G16990,AT5G42210 Orysa4|Os05g24140.1,Orysa4|Os02g44730.1  
AT3G21400 Orysa4|Os12g35550.1  
AT5G49555 Orysa4|Os12g43590.1  
AT3G61010 Orysa4|Os06g20130.1  
AT5G05460,AT3G11040  
Orysa4|Os05g27960.1  
AT1G74680 Orysa4|Os08g34020.1  
AT3G03650,AT3G45400 Orysa4|Os11g03410.1,Orysa4|Os12g03100.1,Orysa4|Os03g20850.1  
AT1G34270 Orysa4|Os04g57510.1  
AT5G16890 Orysa4|Os01g59630.1  
AT1G67410 Orysa4|Os01g69220.1  
AT2G35100,AT5G44930 Orysa4|Os07g37960.1  
AT5G47810 Orysa4|Os04g39420.1  
AT5G61580  
AT2G22480 Orysa4|Os08g34050.1,Orysa4|Os09g24910.1,Orysa4|Os10g26570.1  
AT4G26270,AT5G56630,AT4G29220,AT4G32840 Orysa4|Os05g10650.1,Orysa4|Os01g09570.1  
Orysa4|Os01g53680.1,Orysa4|Os06g11080.1  
Orysa4|Os09g30240.1  
Orysa4|Os05g44922.1  
AT4G03320 Orysa4|Os07g38110.1  
AT1G08910,AT5G41580 Orysa4|Os06g06870.1  
AT3G12080  
Orysa4|Os11g41910.1  
AT3G15620 Orysa4|Os02g10990.1  
AT4G04614 Orysa4|Os06g42430.1

AT5G24400  
AT5G24410,AT3G49360,AT5G24420  
Orysa4|Os08g43370.1,Orysa4|Os09g35970.1  
AT1G13700 Orysa4|Os03g30300.1  
AT2G22370 Orysa4|Os02g10050.1  
AT5G47790 Orysa4|Os08g23680.1  
AT2G37975  
Orysa4|Os09g15760.1,Orysa4|Os03g21390.1  
AT1G48420 Orysa4|Os02g53330.1  
AT4G14147 Orysa4|Os03g63090.1  
AT5G65860 Orysa4|Os03g55330.1  
AT3G55480 Orysa4|Os01g74180.1  
AT2G39630 Orysa4|Os03g60700.1  
AT1G23000 Orysa4|Os01g03490.1  
AT3G06130,AT5G19090,AT3G05220 Orysa4|Os11g05010.1,Orysa4|Os12g05040.1  
AT5G37860  
Orysa4|Os01g61070.1  
AT4G23882,AT3G04900,AT1G30473  
AT1G56210,AT5G27690  
Orysa4|Os03g22490.1,Orysa4|Os07g47480.1,Orysa4|Os01g70710.1,Orysa4|Os05g30570.1,Orysa4|Os09  
g14240.1,Orysa4|Os05g05820.1  
Orysa4|Os05g30410.1  
AT1G07170,AT2G30000  
Orysa4|Os04g56760.1  
Orysa4|Os11g30290.1  
AT5G43600 Orysa4|Os12g40550.1  
AT1G49940 Orysa4|Os03g40840.1,Orysa4|Os08g03620.1  
AT3G51280 Orysa4|Os09g36740.1  
AT5G44330,AT4G20900  
AT1G04770 Orysa4|Os05g43040.1  
AT5G48850  
AT3G61030,AT3G60950,AT3G61050 Orysa4|Os07g22640.1  
Orysa4|Os03g14700.1  
AT5G13830 Orysa4|Os03g60750.1  
AT5G16790,AT3G02950 Orysa4|Os05g49470.1,Orysa4|Os08g06360.1  
AT3G04800 Orysa4|Os04g47900.1,Orysa4|Os02g45100.1  
AT1G72750,AT1G17530 Orysa4|Os10g37530.1,Orysa4|Os03g02390.1,Orysa4|Os03g47300.1  
AT5G57460 Orysa4|Os08g14620.1  
AT2G37920 Orysa4|Os02g35620.1  
AT1G19490 Orysa4|Os11g05640.1  
AT5G12110,AT5G19510 Orysa4|Os07g46750.1  
AT2G18110,AT1G30230 Orysa4|Os03g29260.1,Orysa4|Os07g42300.1  
AT1G70770,AT1G23170,AT3G11880 Orysa4|Os01g03760.1  
AT2G18070  
AT3G01040,AT5G15470 Orysa4|Os03g11330.1,Orysa4|Os12g38930.1  
AT5G47780 Orysa4|Os08g23780.1  
AT3G58790 Orysa4|Os01g52710.1  
AT2G38650 Orysa4|Os03g21250.1,Orysa4|Os07g48370.1,Orysa4|Os11g03160.1,Orysa4|Os12g02910.1  
AT3G61130,Orysa4|Os09g36190.1,Orysa4|Os09g36180.1,Orysa4|Os06g49810.1  
Orysa4|Os08g38740.1  
AT4G38270 Orysa4|Os10g21890.1,Orysa4|Os06g51160.1  
AT2G46480  
Orysa4|Os03g30000.1  
AT2G20810 Orysa4|Os04g54360.1  
AT1G18580,AT3G25140,AT3G02350 Orysa4|Os06g12280.1,Orysa4|Os02g51130.1  
AT5G54690  
AT2G30575,AT1G06780 Orysa4|Os11g37980.1  
AT3G05000 Orysa4|Os07g19060.1,Orysa4|Os09g06970.1  
AT3G24440  
Orysa4|Os02g05840.1  
AT2G18870 Orysa4|Os12g34850.1  
Orysa4|Os08g12430.1  
AT2G18880,AT4G30200,AT5G57380  
AT1G04130 Orysa4|Os03g53910.1  
AT1G08680 Orysa4|Os03g20720.1,Orysa4|Os01g59850.1  
AT5G51020 Orysa4|Os11g32160.1  
AT4G28760,AT2G20240,AT5G43880  
Orysa4|Os02g40410.1,Orysa4|Os04g42770.1,Orysa4|Os03g04990.1,Orysa4|Os02g57140.1  
AT3G53540 Orysa4|Os03g17210.1  
Orysa4|Os05g02990.1  
AT4G31130,Orysa4|Os05g38960.1  
AT3G02060 Orysa4|Os11g32880.1  
AT1G48240,AT3G17440 Orysa4|Os03g25390.1  
AT2G35190 Orysa4|Os06g50120.1  
AT5G22100 Orysa4|Os03g61790.1  
Orysa4|Os11g13400.1  
AT1G04070,AT5G43970 Orysa4|Os02g03880.1,Orysa4|Os02g29400.1  
AT2G29210  
Orysa4|Os03g16369.1  
Orysa4|Os05g26870.1  
Orysa4|Os03g08740.1  
AT5G66820



AT2G41610 Orysa4|Os03g14880.1  
AT4G32175,AT2G25355 Orysa4|Os01g47256.1,Orysa4|Os01g66730.1  
AT3G25520,AT5G39740 Orysa4|Os01g67134.1  
AT1G21350 Orysa4|Os07g15670.1  
AT4G18975 Orysa4|Os07g36180.1  
AT5G22370 Orysa4|Os02g34950.1  
AT3G14750 Orysa4|Os07g32450.1  
AT1G67170 Orysa4|Os03g60360.1  
AT2G30120  
AT1G55170 Orysa4|Os12g09089.1  
AT5G61920 Orysa4|Os04g40300.1  
Orysa4|Os08g33330.1  
AT3G21740 Orysa4|Os04g53612.1  
AT5G61930 Orysa4|Os07g40920.1  
AT1G64810  
AT5G57930 Orysa4|Os02g50010.1  
AT3G52300 Orysa4|Os08g37320.1  
AT3G57000 Orysa4|Os02g18830.1  
Orysa4|Os05g49440.1  
AT2G31985,AT1G05510  
AT4G18920,AT5G45690,AT1G29680 Orysa4|Os01g54520.1,Orysa4|Os01g52830.1  
AT1G16350,AT1G79470 Orysa4|Os03g56800.1  
AT2G01860 Orysa4|Os02g02590.1  
Orysa4|Os03g47804.1  
AT4G14900,AT3G22440 Orysa4|Os07g07680.1,Orysa4|Os03g58070.1  
AT1G80520,AT1G15760,AT2G12462 Orysa4|Os06g43770.1,Orysa4|Os04g55120.1  
AT1G64300,AT5G41730,AT1G01450 Orysa4|Os05g34910.1,Orysa4|Os05g50830.1,Orysa4|Os01g43350.1  
AT5G01460,AT3G08930 Orysa4|Os06g03760.1  
AT1G01880 Orysa4|Os09g35000.1  
Orysa4|Os02g29540.1,Orysa4|Os07g10610.1  
AT4G13270,AT1G52330 Orysa4|Os03g48950.1  
Orysa4|Os04g34580.1  
Orysa4|Os03g05990.1,Orysa4|Os03g05920.1,Orysa4|Os03g05860.1,Orysa4|Os03g05880.1,Orysa4|Os03g05900.1,Orysa4|Os03g05910.1  
Orysa4|Os03g05840.1  
AT5G05320,AT4G38540  
AT4G15765,AT4G15760  
AT2G35660,AT2G29720 Orysa4|Os07g30960.1  
AT1G55480 Orysa4|Os07g07540.1  
AT4G02940,AT2G48080 Orysa4|Os05g33310.1  
AT3G24560 Orysa4|Os02g16670.1  
AT5G16010 Orysa4|Os07g06800.1  
AT5G57900,AT4G30640 Orysa4|Os08g16840.1  
AT1G09330 Orysa4|Os05g06700.1,Orysa4|Os01g22870.1  
AT5G04190 Orysa4|Os01g15990.1  
AT1G74970 Orysa4|Os03g55930.1  
AT5G60340 Orysa4|Os07g22950.1  
AT2G03420 Orysa4|Os03g11230.1  
AT5G23870  
AT4G19410,AT5G45280 Orysa4|Os04g51340.1  
Orysa4|Os01g21630.1  
AT3G62060,AT2G46930,AT5G26670,AT3G05910,AT1G09550,AT1G57590 Orysa4|Os07g44070.1  
AT3G09410 Orysa4|Os01g74330.1,Orysa4|Os05g02120.1,Orysa4|Os01g66850.1,Orysa4|Os01g66830.1,Orysa4|Os01g66840.1  
AT4G19420 Orysa4|Os02g47400.1  
AT2G01720  
AT1G76400 Orysa4|Os05g23600.1  
AT3G17590 Orysa4|Os02g49190.1  
AT4G21180,AT1G79940 Orysa4|Os04g24180.1  
AT3G18370 Orysa4|Os01g03820.1  
AT5G58575 Orysa4|Os05g28370.1  
AT1G68590,AT5G15760 Orysa4|Os04g38750.1  
AT1G67270,AT1G67780,AT5G38690 Orysa4|Os02g20950.1,Orysa4|Os05g23530.1  
AT1G78930 Orysa4|Os10g36750.1,Orysa4|Os09g38720.1  
AT1G76750 Orysa4|Os03g18530.1  
Orysa4|Os11g06730.1,Orysa4|Os12g06970.1  
Orysa4|Os01g49250.1  
AT1G66680 Orysa4|Os01g03090.1  
AT3G52030 Orysa4|Os11g07970.1  
AT5G27970 Orysa4|Os01g56590.1  
Orysa4|Os10g40510.1,Orysa4|Os10g40530.1,Orysa4|Os10g40520.1,Orysa4|Os03g58670.1,Orysa4|Os06g01580.1,Orysa4|Os10g40470.1,Orysa4|Os10g40460.1,Orysa4|Os10g40480.1,Orysa4|Os10g40440.1,Orysa4|Os10g40430.1,Orysa4|Os10g20840.1,Orysa4|Os10g20830.1,Orysa4|Os10g20860.1,Orysa4|Os10g20880.1  
AT4G00165 Orysa4|Os04g52260.1,Orysa4|Os04g52250.1,Orysa4|Os02g44320.1,Orysa4|Os04g46830.1  
AT4G12490,AT4G12500,AT4G12470,AT4G12480,AT4G12510,AT4G12520,AT1G12090,AT1G62510,AT4G12545,AT4G12550,AT4G22460,AT4G12530,AT5G46890,AT5G46900,AT2G45180  
Orysa4|Os04g46820.1,Orysa4|Os04g46810.1,Orysa4|Os02g44310.1,Orysa4|Os10g40614.1  
AT2G10940 Orysa4|Os06g43600.1  
AT4G22610,AT4G22520

Orysa4|Os03g01300.1,Orysa4|Os03g01310.1,Orysa4|Os03g50960.1,Orysa4|Os10g09920.1  
AT1G62500  
Orysa4|Os04g55170.1  
AT4G22490  
AT1G12100  
Orysa4|Os03g14630.1  
Orysa4|Os06g46830.1  
AT5G03555 Orysa4|Os02g44680.1  
AT5G40740 Orysa4|Os02g22370.1  
AT1G80680 Orysa4|Os03g07580.1  
AT3G54290 Orysa4|Os01g64250.1  
AT1G72040 Orysa4|Os05g35520.1  
AT1G75060,AT1G19330 Orysa4|Os10g21460.1  
Orysa4|Os02g57740.1,Orysa4|Os04g08450.1  
AT3G08710 Orysa4|Os05g07690.1,Orysa4|Os01g07376.1  
AT3G17880 Orysa4|Os09g23650.1  
Orysa4|Os05g40190.1  
AT1G19730 Orysa4|Os07g08840.1  
AT3G56420,AT2G40790  
Orysa4|Os01g14850.1  
Orysa4|Os12g18220.1  
AT3G53220  
Orysa4|Os09g38670.1  
AT5G39950 Orysa4|Os07g09310.1,Orysa4|Os03g58630.1  
AT4G22670 Orysa4|Os02g01030.1  
AT1G69880,AT1G59730  
AT5G42980,AT1G45145  
AT5G16400,AT3G02730 Orysa4|Os01g68480.1  
AT3G51030  
AT1G11530Orysa4|Os04g53740.1  
AT1G31020,AT2G35010 Orysa4|Os06g45510.1  
Orysa4|Os01g70320.1  
AT5G23700,AT3G48860  
AT4G08630  
AT5G13260  
Orysa4|Os05g05580.1,Orysa4|Os11g31960.1  
AT4G25070  
Orysa4|Os02g48330.1  
AT1G76490,AT2G17370 Orysa4|Os09g31970.1,Orysa4|Os08g40180.1  
AT4G02250,AT1G55770 Orysa4|Os03g61530.1  
AT5G13220 Orysa4|Os04g32480.1  
AT5G20600 Orysa4|Os04g56350.1  
AT5G01010 Orysa4|Os05g24020.1  
AT3G51800 Orysa4|Os05g28280.1  
AT4G16700 Orysa4|Os03g01216.1  
AT5G03280 Orysa4|Os07g06130.1,Orysa4|Os07g06190.1,Orysa4|Os03g49400.1  
AT3G07180 Orysa4|Os11g11520.1,Orysa4|Os01g67960.1  
AT1G29940 Orysa4|Os10g35290.1  
AT5G45140 Orysa4|Os03g28960.1  
AT3G18090,AT3G23780 Orysa4|Os08g07480.1  
AT4G21710 Orysa4|Os03g44484.1  
AT5G08410,AT5G23440 Orysa4|Os04g44650.1,Orysa4|Os02g42570.1  
AT5G64620 Orysa4|Os01g02070.1,Orysa4|Os01g20970.1,Orysa4|Os12g18560.1,Orysa4|Os08g01670.1  
Orysa4|Os09g21100.1  
AT1G10600 Orysa4|Os01g47262.1  
AT1G48790,AT4G16144 Orysa4|Os01g31470.1,Orysa4|Os01g23640.1  
AT2G35120 Orysa4|Os02g07410.1  
AT2G35370,AT1G32470 Orysa4|Os10g37180.1  
AT5G56120 Orysa4|Os08g38760.1  
AT3G12870 Orysa4|Os03g56700.1  
AT5G08530 Orysa4|Os07g45090.1  
AT5G63460 Orysa4|Os12g25640.1,Orysa4|Os11g29340.1  
Orysa4|Os03g07300.1  
AT3G01850,AT1G63290  
AT5G61410  
Orysa4|Os09g32810.1  
Orysa4|Os06g49000.1  
Orysa4|Os05g14680.1,Orysa4|Os05g25890.1,Orysa4|Os07g08270.1,Orysa4|Os07g08290.1,Orysa4|Os08  
g11500.1,Orysa4|Os10g39570.1,Orysa4|Os11g15510.1  
Orysa4|Os04g07040.1,Orysa4|Os11g43180.1,Orysa4|Os05g31710.1,Orysa4|Os11g15490.1  
Orysa4|Os04g06990.1,Orysa4|Os04g07250.1,Orysa4|Os04g06810.1,Orysa4|Os04g06900.1,Orysa4|Os04  
g05090.1,Orysa4|Os12g21940.1,Orysa4|Os04g06910.1,Orysa4|Os04g05770.1,Orysa4|Os04g05700.1,Orysa4|Os04g  
07110.1,Orysa4|Os04g08080.1,Orysa4|Os04g08190.1,Orysa4|Os08g09570.1,Orysa4|Os04g12110.1,Orysa4|Os04g0  
6920.1  
Orysa4|Os04g06840.1  
Orysa4|Os07g17050.1,Orysa4|Os12g40200.1  
Orysa4|Os10g05300.1  
AT5G45530,AT5G45470,AT5G45480,AT5G45540,AT4G19090  
Orysa4|Os07g01840.1,Orysa4|Os07g01520.1,Orysa4|Os10g20770.1,Orysa4|Os11g42030.1,Orysa4|Os01  
g72380.1,Orysa4|Os01g58500.1  
Orysa4|Os07g16760.1  
Orysa4|Os04g06890.1

AT5G45460  
Orysa4|Os10g05440.1,Orysa4|Os10g05410.1,Orysa4|Os07g16600.1,Orysa4|Os07g16930.1,Orysa4|Os08g05410.1,Orysa4|Os05g46690.1,Orysa4|Os04g14540.1,Orysa4|Os02g14700.1,Orysa4|Os02g14870.1,Orysa4|Os02g14810.1,Orysa4|Os09g38930.1,Orysa4|Os08g04490.1,Orysa4|Os10g10480.1,Orysa4|Os11g39920.1,Orysa4|Os07g26560.1  
AT4G19080 Orysa4|Os08g05370.1  
Orysa4|Os07g16740.1  
Orysa4|Os04g06930.1  
AT5G05740 Orysa4|Os01g04900.1  
AT3G58130,AT2G27340 Orysa4|Os04g58210.1  
AT1G76200 Orysa4|Os05g03150.1,Orysa4|Os06g50970.1  
AT5G15540 Orysa4|Os07g01940.1  
AT1G21190,AT1G76860  
Orysa4|Os01g64690.1  
AT1G76480,AT1G20890 Orysa4|Os08g28740.1,Orysa4|Os03g58930.1  
AT4G32420 Orysa4|Os02g10970.1  
AT4G34960 Orysa4|Os09g36670.1  
AT3G62030  
AT5G13120  
AT3G56070  
Orysa4|Os01g18210.1  
AT5G67530 Orysa4|Os03g10400.1  
Orysa4|Os10g06630.1  
Orysa4|Os06g04000.1  
AT2G15790 Orysa4|Os02g52360.1,Orysa4|Os06g11320.1  
AT5G58710,AT2G29960 Orysa4|Os06g49480.1  
AT1G01940  
AT4G38740,AT2G21130,AT2G16600,AT4G34870 Orysa4|Os02g02890.1  
AT2G38730  
Orysa4|Os09g39780.1  
Orysa4|Os07g08190.1  
Orysa4|Os03g59700.1  
AT3G55920  
Orysa4|Os06g49470.1  
AT2G36130 Orysa4|Os08g44520.1  
AT3G44600 Orysa4|Os08g44330.1  
AT4G33060 Orysa4|Os01g40050.1  
AT3G63400  
Orysa4|Os05g01270.1  
AT3G22920 Orysa4|Os02g02090.1  
AT2G35290 Orysa4|Os12g25770.1,Orysa4|Os03g07400.1  
AT5G11270,Orysa4|Os06g39906.1  
AT2G30230,AT1G06980,AT1G29195 Orysa4|Os01g07150.1,Orysa4|Os03g18660.1,Orysa4|Os05g39710.1  
Orysa4|Os12g30500.1,Orysa4|Os11g36740.1  
AT3G11850,AT5G06560,AT3G54740 Orysa4|Os03g44800.1  
AT5G57830,AT4G30830 Orysa4|Os07g06810.1,Orysa4|Os03g57530.1  
AT1G27700,AT2G18860,AT4G30240 Orysa4|Os03g10920.1,Orysa4|Os10g20240.1  
AT2G25910 Orysa4|Os01g38620.1  
AT1G30510,AT4G05390 Orysa4|Os03g57120.1,Orysa4|Os07g05400.1  
AT5G66190,AT1G20020 Orysa4|Os06g01850.1,Orysa4|Os02g01340.1  
AT4G15470 Orysa4|Os05g33360.1  
AT4G14730 Orysa4|Os11g37200.1,Orysa4|Os07g08060.1  
AT4G02690,AT1G03070,AT3G63310 Orysa4|Os03g58150.1,Orysa4|Os03g53400.1  
AT5G41140,AT1G63300 Orysa4|Os10g36060.1  
Orysa4|Os03g01710.1  
AT5G52280  
AT1G21690 Orysa4|Os12g07720.1  
Orysa4|Os05g15360.1  
AT3G01790 Orysa4|Os01g67200.1,Orysa4|Os05g15370.1  
AT5G54850 Orysa4|Os07g33650.1  
Orysa4|Os05g37160.1  
AT5G55280 Orysa4|Os04g56970.1  
AT2G36250,AT3G52750 Orysa4|Os03g44420.1  
AT5G52650,AT4G25740,AT5G41520 Orysa4|Os04g35090.1,Orysa4|Os02g34460.1,Orysa4|Os01g73160.1  
AT1G05180,AT2G32410,AT3G25880 Orysa4|Os03g60550.1  
AT4G10260,AT1G50390,AT1G06030,AT1G06020,AT2G31390,AT3G59480  
AT1G69200 Orysa4|Os03g40550.1  
AT5G51830  
AT1G66430 Orysa4|Os06g12600.1  
AT3G54090 Orysa4|Os01g63220.1  
AT1G04850  
Orysa4|Os02g30180.1  
AT5G48690 Orysa4|Os08g41500.1  
AT3G01130,AT5G15320 Orysa4|Os04g02670.1  
Orysa4|Os02g20980.1  
AT1G28760 Orysa4|Os03g45180.1  
AT5G67610,AT3G49840 Orysa4|Os03g31570.1  
AT5G58250 Orysa4|Os03g21370.1  
AT2G41705 Orysa4|Os10g41749.1  
Orysa4|Os12g01260.1,Orysa4|Os11g01300.1  
AT2G45070,AT3G60540 Orysa4|Os12g07490.1,Orysa4|Os01g38510.1  
AT5G60460

Orysa4|Os03g31700.1  
Orysa4|Os09g27340.1  
Orysa4|Os06g48250.1,Orysa4|Os06g48240.1  
AT2G46620 Orysa4|Os03g02330.1  
AT1G43910  
AT4G05380,AT4G05340  
Orysa4|Os12g29830.1  
AT2G18190,AT2G18193 Orysa4|Os01g42030.1,Orysa4|Os05g51130.1  
AT5G57480,AT4G25835,AT4G30250 Orysa4|Os09g26260.1  
AT4G05370,AT5G40010,AT3G28580,AT3G28560,AT3G28540,AT3G28510,AT3G28520,AT3G28610,AT3G28600,AT5  
G40000,AT3G28570  
Orysa4|Os12g28137.1,Orysa4|Os12g28177.1,Orysa4|Os12g28710.1,Orysa4|Os12g28590.1,Orysa4|Os12  
g28550.1,Orysa4|Os12g28460.1,Orysa4|Os07g09470.1,Orysa4|Os07g09480.1,Orysa4|Os01g19260.1,Orysa4|Os07g  
09420.1,Orysa4|Os03g58790.1,Orysa4|Os07g09490.1,Orysa4|Os12g44220.1,Orysa4|Os12g44210.1,Orysa4|Os12g4  
4190.1,Orysa4|Os12g24320.1  
Orysa4|Os05g02440.1,Orysa4|Os05g24830.1  
AT3G50930,AT3G50940  
Orysa4|Os04g34699.1  
Orysa4|Os07g33410.1,Orysa4|Os07g33390.1,Orysa4|Os10g22700.1,Orysa4|Os03g38800.1,Orysa4|Os01  
g40140.1,Orysa4|Os07g33380.1  
Orysa4|Os07g25830.1  
AT5G17750,AT5G17740,AT5G17730,AT5G17760,AT3G29800  
Orysa4|Os01g19180.1  
AT2G44150,AT3G59960 Orysa4|Os09g13740.1  
AT4G30860 Orysa4|Os02g39800.1  
AT1G78790 Orysa4|Os04g40550.1  
AT5G54890 Orysa4|Os08g08860.1  
AT4G31010 Orysa4|Os08g07790.1  
Orysa4|Os01g31110.1  
Orysa4|Os08g08890.1  
AT1G23400 Orysa4|Os01g21990.1  
AT2G20020  
Orysa4|Os09g01630.1  
AT2G40650  
Orysa4|Os04g48600.1,Orysa4|Os09g31458.1  
AT3G57990 Orysa4|Os09g10690.1  
AT1G55680,AT3G13340,AT5G56190 Orysa4|Os08g38880.1,Orysa4|Os02g48964.1  
Orysa4|Os08g31560.1  
AT1G78070,AT1G36070 Orysa4|Os03g26870.1  
AT1G63160 Orysa4|Os04g48060.1  
AT4G10320 Orysa4|Os02g09120.1,Orysa4|Os06g43760.1  
Orysa4|Os02g09100.1  
AT4G13050,AT3G25110  
Orysa4|Os01g31760.1  
AT1G08510 Orysa4|Os02g43090.1,Orysa4|Os11g43820.1,Orysa4|Os06g05130.1,Orysa4|Os06g39520.1  
Orysa4|Os09g32760.1  
AT4G10090 Orysa4|Os03g17560.1  
AT2G22010 Orysa4|Os07g43380.1  
AT3G13300,AT3G13290 Orysa4|Os02g49090.1,Orysa4|Os06g19660.1  
AT1G10700 Orysa4|Os01g52530.1  
AT2G42910 Orysa4|Os02g48390.1  
AT3G28670 Orysa4|Os08g01110.1,Orysa4|Os10g11110.1  
AT5G24890,AT4G31510,AT2G24550,AT3G03170 Orysa4|Os08g40510.1,Orysa4|Os09g32330.1  
AT1G08460  
Orysa4|Os05g36930.1,Orysa4|Os05g36920.1  
AT5G42320 Orysa4|Os02g02710.1  
AT3G19240,AT4G33400 Orysa4|Os02g54780.1,Orysa4|Os02g08190.1  
AT5G39380,AT5G15430,AT5G61260,AT5G07820 Orysa4|Os12g38910.1  
AT3G28020,AT3G48770 Orysa4|Os11g31480.1,Orysa4|Os11g31500.1,Orysa4|Os12g29350.1  
AT4G39680 Orysa4|Os07g43316.1,Orysa4|Os03g26630.1  
AT5G03660,AT3G09980,AT2G36410,AT3G52920,AT2G27740,AT2G36355,AT3G52900  
Orysa4|Os02g32650.1,Orysa4|Os04g33450.1  
AT5G18590 Orysa4|Os11g43590.1,Orysa4|Os12g35350.1  
AT3G46200 Orysa4|Os05g02640.1  
AT5G21050 Orysa4|Os03g51210.1  
AT5G64090 Orysa4|Os11g06860.1  
AT3G16090,AT1G65040 Orysa4|Os05g33830.1,Orysa4|Os06g19680.1  
Orysa4|Os01g22500.1  
AT5G30490  
AT3G08840 Orysa4|Os07g49110.1  
AT1G10320  
AT3G44785  
AT1G27650,AT5G42820 Orysa4|Os01g47750.1,Orysa4|Os05g48960.1  
Orysa4|Os09g31482.1  
Orysa4|Os02g35150.1  
AT1G07985 Orysa4|Os03g42520.1  
AT1G19240 Orysa4|Os01g05140.1  
Orysa4|Os08g44320.1  
AT3G44620  
Orysa4|Os03g28980.1,Orysa4|Os03g19990.1,Orysa4|Os12g24330.1  
AT4G01870 Orysa4|Os07g44410.1  
AT1G21680,AT1G21670

Orysa4|Os03g62370.1  
Orysa4|Os04g20930.1  
AT5G15680 Orysa4|Os02g58410.1  
AT1G78190,AT1G22270 Orysa4|Os07g43020.1  
AT5G38380 Orysa4|Os07g18250.1  
AT1G29220 Orysa4|Os01g55490.1  
AT3G21000,AT3G20980 Orysa4|Os08g15690.1  
Orysa4|Os11g43510.1  
AT5G18630,AT5G18640  
Orysa4|Os01g71010.1,Orysa4|Os05g30900.1,Orysa4|Os03g22670.1,Orysa4|Os07g47250.1  
AT4G12620,AT4G14700 Orysa4|Os06g08790.1  
AT2G45790 Orysa4|Os04g58580.1  
AT1G61050,AT3G09020,AT5G01250,AT2G38150 Orysa4|Os04g44740.1  
AT4G34360 Orysa4|Os11g35340.1  
AT3G44940,AT5G22930,AT2G28140  
AT5G59760 Orysa4|Os04g05070.1,Orysa4|Os05g02450.1  
AT3G06840,AT5G49170 Orysa4|Os05g29080.1  
Orysa4|Os01g49190.1,Orysa4|Os05g47980.1  
Orysa4|Os03g55874.1,Orysa4|Os06g39740.1,Orysa4|Os12g10570.1,Orysa4|Os10g21270.1  
AT5G08670,AT5G08690,AT5G08680  
AT5G25770 Orysa4|Os06g06770.1  
Orysa4|Os03g16870.1  
AT3G04020  
AT3G59410  
Orysa4|Os04g41510.1  
AT3G54010 Orysa4|Os03g25140.1  
AT2G48060 Orysa4|Os01g29220.1  
AT1G44446 Orysa4|Os10g41760.1,Orysa4|Os10g41780.1  
AT5G62600  
Orysa4|Os10g33770.1  
AT5G19970 Orysa4|Os01g45900.1  
AT2G32090 Orysa4|Os03g45720.1  
AT1G15410 Orysa4|Os01g37470.1  
AT3G19800 Orysa4|Os04g44340.1  
AT4G27540 Orysa4|Os09g04880.1  
AT1G14345 Orysa4|Os03g07440.1  
AT5G65520 Orysa4|Os02g10950.1,Orysa4|Os02g10940.1  
AT1G52780 Orysa4|Os07g39240.1,Orysa4|Os07g39250.1,Orysa4|Os02g46270.1,Orysa4|Os01g08170.1  
AT2G35035 Orysa4|Os02g07670.1  
AT4G14760,AT3G22790,AT4G02710,AT1G03080 Orysa4|Os03g06510.1,Orysa4|Os10g28610.1  
AT2G30500,AT5G58320 Orysa4|Os05g07680.1,Orysa4|Os01g07370.1,Orysa4|Os01g07360.1  
AT3G10880,AT5G05180  
Orysa4|Os03g43684.1,Orysa4|Os12g41200.1  
AT5G04260 Orysa4|Os02g57380.1  
Orysa4|Os02g53400.1  
AT5G06690  
AT2G30370 Orysa4|Os01g60900.1  
Orysa4|Os05g39880.1  
Orysa4|Os11g37190.1,Orysa4|Os03g06610.1  
AT4G14723,AT3G22820  
AT3G21060 Orysa4|Os03g10990.1  
AT5G24840 Orysa4|Os06g12990.1  
AT1G10740,AT1G23330 Orysa4|Os05g33820.1  
AT5G23880 Orysa4|Os09g39590.1  
Orysa4|Os02g06940.1  
AT5G52540,AT5G24000  
Orysa4|Os06g01790.1  
Orysa4|Os07g08400.1,Orysa4|Os03g58240.1  
AT2G38840  
AT1G73230,AT1G17880  
Orysa4|Os03g01910.1  
Orysa4|Os03g63400.1  
AT5G65120,AT5G10110 Orysa4|Os02g51640.1  
AT2G42130,AT3G58010 Orysa4|Os04g57020.1  
AT3G58460 Orysa4|Os03g44830.1  
AT1G02620  
AT3G62560,AT4G02080 Orysa4|Os01g15010.1,Orysa4|Os12g37360.1  
AT1G09180,AT1G56330  
Orysa4|Os06g12090.1  
AT1G29840,AT3G47560,AT3G47590,AT2G19550,AT5G11910  
Orysa4|Os01g39800.1,Orysa4|Os01g39790.1,Orysa4|Os05g46210.1  
AT5G54110  
AT4G21450,AT4G05060 Orysa4|Os08g04620.1,Orysa4|Os07g37270.1  
AT1G80420  
Orysa4|Os06g05190.1  
AT3G56570 Orysa4|Os01g65730.1  
AT2G26340 Orysa4|Os03g07960.1  
Orysa4|Os03g40450.1  
AT3G48140 Orysa4|Os07g17310.1,Orysa4|Os07g17330.1  
AT3G29970 Orysa4|Os07g41350.1,Orysa4|Os07g41340.1  
AT3G15270,AT1G53160  
Orysa4|Os08g40260.1

AT1G20980,AT1G76580  
Orysa4|Os03g18440.1  
AT5G58510  
Orysa4|Os04g36730.1,Orysa4|Os02g35600.1  
AT2G02470,AT1G14510 Orysa4|Os07g41740.1  
AT5G20510,AT3G42790,AT5G26210 Orysa4|Os05g34640.1,Orysa4|Os01g66420.1  
AT5G05610,AT3G11200 Orysa4|Os03g60390.1,Orysa4|Os05g07040.1,Orysa4|Os01g06540.1  
AT2G19540 Orysa4|Os12g03822.1,Orysa4|Os11g03990.1  
AT2G44860 Orysa4|Os07g19190.1,Orysa4|Os01g33050.1  
AT3G52100,AT3G08020 Orysa4|Os12g34330.1  
AT1G09760 Orysa4|Os02g13990.1  
Orysa4|Os04g47110.1  
AT1G03910  
Orysa4|Os03g58590.1  
AT5G46740,AT4G17895 Orysa4|Os02g46650.1  
Orysa4|Os02g55180.1,Orysa4|Os06g08530.1  
AT1G17110Orysa4|Os02g14730.1  
AT3G14400  
AT4G30890 Orysa4|Os07g46660.1  
AT5G65450,AT4G24560 Orysa4|Os09g28940.1,Orysa4|Os08g37350.1  
AT5G57990  
Orysa4|Os11g34270.1  
Orysa4|Os05g43480.1  
AT4G31670,AT2G24640  
AT1G75120,AT1G75110,AT1G19360 Orysa4|Os07g39840.1  
AT5G47630  
AT5G36280,AT1G65290 Orysa4|Os03g23000.1,Orysa4|Os03g22950.1,Orysa4|Os05g31290.1  
AT2G44620 Orysa4|Os07g12150.1  
AT4G01897 Orysa4|Os03g36630.1  
AT5G56750,AT2G19620,AT5G11790  
Orysa4|Os06g36740.1,Orysa4|Os02g13150.1,Orysa4|Os05g10740.1,Orysa4|Os01g09670.1  
Orysa4|Os04g42210.1,Orysa4|Os02g33740.1  
Orysa4|Os02g48980.1  
AT5G56170  
Orysa4|Os06g19990.1  
Orysa4|Os09g12620.1  
AT2G20700,AT4G28280  
AT4G39920 Orysa4|Os02g35110.1  
AT4G14000 Orysa4|Os09g19570.1  
Orysa4|Os09g33920.1  
AT2G43320 Orysa4|Os04g41500.1  
AT2G37500  
Orysa4|Os03g17120.1  
Orysa4|Os08g44640.1  
AT2G27920 Orysa4|Os03g27480.1,Orysa4|Os03g27590.1,Orysa4|Os03g27510.1,Orysa4|Os03g27530.1  
AT3G01020,AT4G04080,AT4G22220 Orysa4|Os05g49300.1,Orysa4|Os01g47340.1  
AT4G12610 Orysa4|Os03g14720.1,Orysa4|Os10g10990.1  
AT1G35420 Orysa4|Os05g35470.1  
AT1G14520 Orysa4|Os06g36560.1  
AT5G56640,AT4G26260,AT2G19800  
AT4G28025 Orysa4|Os02g39730.1  
AT5G44150 Orysa4|Os05g48940.1  
AT4G33560,AT2G14070,AT4G10265,AT4G10270  
Orysa4|Os04g54310.1,Orysa4|Os04g54240.1,Orysa4|Os04g54300.1,Orysa4|Os08g08090.1,Orysa4|Os04g54230.1,Orysa4|Os02g06560.1,Orysa4|Os06g46970.1  
Orysa4|Os03g37470.1  
AT4G23030 Orysa4|Os04g48290.1,Orysa4|Os02g45380.1,Orysa4|Os10g37920.1  
AT4G21900,AT4G21910,AT1G11670,AT1G61890  
Orysa4|Os10g20400.1  
AT5G49130 Orysa4|Os12g36660.1  
AT1G58340 Orysa4|Os03g12790.1  
AT5G52050  
AT4G22790 Orysa4|Os03g64150.1  
AT3G21690 Orysa4|Os03g37411.1,Orysa4|Os03g37490.1,Orysa4|Os03g37640.1  
AT5G65380,AT5G44050,AT5G10420 Orysa4|Os03g08910.1  
Orysa4|Os12g03240.1,Orysa4|Os02g57580.1,Orysa4|Os11g03484.1  
AT2G34360,AT5G52450,AT1G73700  
Orysa4|Os06g29950.1,Orysa4|Os06g29844.1,Orysa4|Os06g29994.1,Orysa4|Os04g30490.1,Orysa4|Os10g11354.1,Orysa4|Os10g20390.1,Orysa4|Os10g20350.1,Orysa4|Os10g20450.1  
AT3G03620,AT5G17700  
Orysa4|Os02g57570.1  
AT1G33100,AT1G33110,AT1G33090,AT1G33080 Orysa4|Os12g03260.1,Orysa4|Os11g03240.1  
AT1G15180,AT1G15170,AT1G15150,AT1G15160,AT1G71140  
Orysa4|Os05g48040.1,Orysa4|Os01g49120.1,Orysa4|Os01g31980.1  
Orysa4|Os07g33310.1  
Orysa4|Os12g03200.1  
AT5G19700,AT4G29140 Orysa4|Os06g36330.1  
AT4G25640,AT4G00350 Orysa4|Os08g44870.1  
AT5G38030,AT3G26590,AT1G12950,AT1G23300,AT1G47530 Orysa4|Os08g43654.1  
Orysa4|Os12g03230.1  
AT3G59030  
AT1G71870 Orysa4|Os03g62270.1

Orysa4|Os03g08900.1,Orysa4|Os10g20380.1  
Orysa4|Os03g42830.1,Orysa4|Os10g11860.1,Orysa4|Os01g56050.1  
AT3G23550,AT3G23560 Orysa4|Os07g01750.1,Orysa4|Os07g31884.1  
Orysa4|Os06g29900.1  
AT1G64820,AT1G66780,AT1G66760,AT2G04070,AT2G04050,AT2G04040,AT2G04066,AT2G04080,AT2G04090,AT2  
G04100  
Orysa4|Os09g35600.1,Orysa4|Os08g43250.1  
Orysa4|Os09g29284.1  
AT2G38510  
AT1G05720 Orysa4|Os01g66960.1  
AT5G58030 Orysa4|Os01g51220.1  
AT4G33360 Orysa4|Os03g08630.1  
AT2G45000 Orysa4|Os01g63780.1  
Orysa4|Os03g12900.1  
AT5G24155,AT5G24160,AT5G24150,AT5G24140  
Orysa4|Os03g12910.1  
AT1G58440  
AT2G22830,AT4G37760  
Orysa4|Os03g55660.1,Orysa4|Os09g28019.1  
AT4G37130  
AT3G53800 Orysa4|Os03g16460.1  
Orysa4|Os03g60780.1  
AT5G02150,AT3G09350  
AT1G14810  
Orysa4|Os03g55280.1  
AT4G11860,Orysa4|Os06g49800.1  
AT4G22960  
AT1G30010 Orysa4|Os12g21870.1  
AT5G46920 Orysa4|Os06g35020.1  
AT1G67180 Orysa4|Os12g14840.1,Orysa4|Os08g31930.1  
AT5G22040 Orysa4|Os03g16730.1  
AT2G16860 Orysa4|Os06g49710.1  
Orysa4|Os07g48810.1  
AT5G19370  
Orysa4|Os01g65910.1  
Orysa4|Os10g21290.1  
Orysa4|Os08g15280.1  
AT5G64610,AT5G09740  
Orysa4|Os07g43360.1  
AT4G30410,AT5G57780  
Orysa4|Os08g16030.1,Orysa4|Os02g54870.1,Orysa4|Os06g44320.1,Orysa4|Os02g08220.1  
AT2G44130,AT3G59940 Orysa4|Os02g35530.1,Orysa4|Os11g14140.1,Orysa4|Os12g31390.1  
AT1G80440,AT1G15670 Orysa4|Os06g39370.1  
AT4G30550,AT2G23970,AT2G23960,AT4G30530,AT4G30540  
Orysa4|Os03g48060.1  
AT4G36210,AT2G18100 Orysa4|Os10g36830.1,Orysa4|Os03g02170.1  
AT1G10960,AT1G60950  
Orysa4|Os03g45710.1  
AT5G10000  
Orysa4|Os03g61960.1  
AT4G14890  
AT2G27510  
Orysa4|Os05g37140.1,Orysa4|Os01g64120.1  
Orysa4|Os08g01380.1  
AT1G79350  
Orysa4|Os08g12680.1  
Orysa4|Os04g52020.1  
Orysa4|Os04g52030.1  
AT2G07741 Orysa4|Os01g58010.1,Orysa4|Os12g23610.1  
AT2G24970 Orysa4|Os01g56090.1  
AT3G53900 Orysa4|Os05g38170.1  
AT4G03030 Orysa4|Os02g21110.1  
Orysa4|Os02g45880.1  
AT4G39470 Orysa4|Os05g08930.1  
AT5G27620 Orysa4|Os03g52750.1  
AT5G13240 Orysa4|Os04g56730.1  
AT5G44450 Orysa4|Os03g56830.1  
Orysa4|Os04g35810.1,Orysa4|Os12g05550.1  
AT1G08280 Orysa4|Os01g63970.1,Orysa4|Os04g42760.1  
Orysa4|Os06g40110.1  
AT5G23710  
Orysa4|Os12g08000.1  
AT1G75210 Orysa4|Os03g56310.1  
AT1G75340 Orysa4|Os06g49080.1  
AT5G38660 Orysa4|Os08g27010.1  
AT4G19670 Orysa4|Os12g43560.1  
Orysa4|Os11g38710.1,Orysa4|Os09g26460.1  
Orysa4|Os11g03730.1,Orysa4|Os12g03470.1,Orysa4|Os12g03530.1,Orysa4|Os11g03780.1,Orysa4|Os12  
g03480.1,Orysa4|Os07g48750.1,Orysa4|Os03g20420.1  
AT5G26120,AT3G10740  
AT2G22570 Orysa4|Os03g44159.1,Orysa4|Os02g39400.1  
AT1G51560,AT3G21140 Orysa4|Os08g40570.1,Orysa4|Os02g05500.1

Orysa4|Os02g45940.1  
Orysa4|Os04g49420.1  
AT1G07660  
Orysa4|Os05g38760.1  
AT5G59690  
Orysa4|Os05g39050.1  
AT1G07820  
AT3G53730  
AT5G59970  
AT3G45930  
Orysa4|Os10g39410.1  
AT2G28740  
Orysa4|Os05g38740.1  
Orysa4|Os07g36500.1  
Orysa4|Os09g26340.1  
AT3G46320  
Orysa4|Os09g38020.1  
Orysa4|Os01g61920.1  
Orysa4|Os03g02780.1  
Orysa4|Os02g01020.1  
AT4G32620  
Orysa4|Os01g08430.1  
Orysa4|Os01g68680.1  
AT3G04240  
Orysa4|Os02g28830.1  
AT1G18730  
Orysa4|Os02g51020.1  
AT3G24800  
Orysa4|Os09g33740.1,Orysa4|Os02g40810.1  
AT3G45880  
Orysa4|Os09g31050.1  
AT1G34150  
Orysa4|Os03g26440.1  
AT3G21865  
Orysa4|Os04g53690.1  
Orysa4|Os04g57680.1  
AT3G63180,AT3G22380  
Orysa4|Os07g38360.1  
AT5G02270  
Orysa4|Os03g20170.1  
AT1G03905,AT5G44110  
Orysa4|Os02g56550.1  
AT2G06210  
Orysa4|Os07g29360.1  
AT1G11655,AT4G04745  
Orysa4|Os07g33320.1  
AT1G16810  
Orysa4|Os07g09700.1,Orysa4|Os02g49530.1  
AT3G24170  
Orysa4|Os02g56850.1  
AT3G54660  
Orysa4|Os03g06740.1  
Orysa4|Os05g39840.1  
AT3G56270,AT2G40480  
Orysa4|Os03g11190.1  
AT3G51720,AT2G38370  
Orysa4|Os07g48080.1,Orysa4|Os03g22040.1  
Orysa4|Os03g34230.1  
AT5G18660  
Orysa4|Os03g22780.1  
AT3G21640  
Orysa4|Os12g05090.1,Orysa4|Os11g05090.1  
AT4G07990  
Orysa4|Os07g03270.1,Orysa4|Os03g51830.1  
AT2G40390,AT5G64190  
Orysa4|Os07g12800.1,Orysa4|Os01g07130.1  
AT3G12940  
Orysa4|Os07g31440.1  
AT5G24120  
Orysa4|Os05g50930.1  
AT5G56930  
Orysa4|Os01g39100.1  
AT4G39120  
Orysa4|Os09g15400.1,Orysa4|Os07g09330.1  
AT1G64450,AT4G23930  
Orysa4|Os01g13340.1,Orysa4|Os05g14880.1  
AT1G04650  
Orysa4|Os03g05040.1  
AT4G27340  
Orysa4|Os01g29409.1  
AT4G21105  
Orysa4|Os07g45320.1,Orysa4|Os02g06650.1  
Orysa4|Os02g34850.1  
AT1G77300  
AT1G76710  
AT5G40280  
Orysa4|Os01g53600.1  
AT1G09590,AT1G09690,AT1G57660,AT1G57860  
Orysa4|Os10g32820.1,Orysa4|Os03g04750.1  
AT3G01175  
AT3G20260  
Orysa4|Os08g40820.1  
AT1G73850  
Orysa4|Os01g03870.1  
AT5G10910  
Orysa4|Os02g04500.1  
AT4G08920  
Orysa4|Os02g36380.1,Orysa4|Os04g37920.1  
AT1G04400  
Orysa4|Os02g41550.1  
AT3G24080  
Orysa4|Os05g41100.1  
AT3G56860,AT2G41060  
Orysa4|Os01g16090.1  
AT2G22100,AT2G22090  
Orysa4|Os06g20010.1,Orysa4|Os04g54440.1,Orysa4|Os10g38170.1,Orysa4|Os06g29830.1,Orysa4|Os02g39060.1  
AT2G18830,AT3G15010  
Orysa4|Os03g03770.1  
AT2G02050  
AT5G63440  
Orysa4|Os07g19470.1  
AT5G42950  
Orysa4|Os07g04530.1  
AT5G54440  
Orysa4|Os12g36760.1  
AT3G57650  
Orysa4|Os11g41900.1  
AT1G51260  
Orysa4|Os04g35060.1



AT2G23420,AT4G36940 Orysa4|Os03g62110.1  
AT1G21580 Orysa4|Os06g43120.1  
AT1G21570  
AT4G35050,AT2G16780 Orysa4|Os09g36900.1  
AT5G58230 Orysa4|Os03g43890.1  
AT5G63350,AT3G48510,AT5G50360,AT5G40800,AT3G27250,AT5G40790 Orysa4|Os12g13910.1  
AT3G44830  
AT5G13640 Orysa4|Os09g27210.1  
AT5G03790  
AT3G01470 Orysa4|Os02g49700.1  
AT3G61890,AT2G46680 Orysa4|Os04g45810.1,Orysa4|Os02g43330.1,Orysa4|Os09g35910.1  
AT4G40060,AT2G22430,AT5G65310  
AT2G36610  
AT2G18550,AT4G36740,AT5G66700 Orysa4|Os07g39320.1  
AT1G69780,AT1G26960 Orysa4|Os03g07450.1  
AT5G15150,AT3G01220  
Orysa4|Os08g37580.1,Orysa4|Os09g29460.1,Orysa4|Os10g23090.1  
Orysa4|Os09g21180.1,Orysa4|Os08g32080.1  
AT5G53980,AT1G27050  
AT2G40520,AT3G56320  
Orysa4|Os07g48170.1,Orysa4|Os12g18530.1  
AT3G61690 Orysa4|Os03g11240.1  
Orysa4|Os12g02260.1,Orysa4|Os11g02320.1  
AT3G51620  
Orysa4|Os03g21850.1  
AT2G36895 Orysa4|Os03g05800.1  
AT1G19690 Orysa4|Os01g15660.1  
AT3G12100  
Orysa4|Os02g58580.1  
AT5G50430,AT1G17280 Orysa4|Os06g09330.1  
Orysa4|Os06g45840.1  
Orysa4|Os05g07010.1,Orysa4|Os01g06320.1  
Orysa4|Os02g45670.1  
AT4G01280,AT1G01520  
AT5G02840,AT3G09600  
AT5G52660  
AT1G66080 Orysa4|Os03g13450.1  
Orysa4|Os08g31720.1  
AT4G26580,AT5G55970 Orysa4|Os01g50750.1  
AT2G04240,AT1G15100,AT2G01150  
AT3G51325 Orysa4|Os11g04281.1,Orysa4|Os11g04280.1,Orysa4|Os12g04090.1  
Orysa4|Os10g30310.1  
AT3G61180  
AT3G55530  
Orysa4|Os12g39110.1  
Orysa4|Os03g10890.1  
AT1G63170,AT1G12760,AT4G11680 Orysa4|Os07g27950.1,Orysa4|Os04g48050.1  
AT1G68070,AT2G01735 Orysa4|Os02g50290.1  
AT3G04770,AT1G72370  
Orysa4|Os03g08440.1,Orysa4|Os07g42450.1  
AT1G06730 Orysa4|Os03g06880.1  
Orysa4|Os04g42920.1  
AT1G54340,AT1G65930 Orysa4|Os01g46610.1  
Orysa4|Os01g14580.1  
AT5G14590  
AT2G42400  
AT1G28520  
Orysa4|Os01g54930.1,Orysa4|Os05g43950.1  
AT5G49570 Orysa4|Os07g31460.1  
Orysa4|Os12g06480.1  
Orysa4|Os11g06130.1  
AT1G43770,AT4G17850  
AT5G61100 Orysa4|Os03g11490.1  
Orysa4|Os12g06464.1,Orysa4|Os12g06440.1  
AT5G16680,AT3G02890 Orysa4|Os03g30740.1,Orysa4|Os10g42196.1,Orysa4|Os12g24540.1  
AT3G50920,AT5G66450 Orysa4|Os02g47570.1  
AT1G75390,AT4G34590,AT2G18160  
Orysa4|Os02g03960.1,Orysa4|Os09g13570.1  
AT5G49450,AT4G37730,AT2G22850,AT3G49760  
Orysa4|Os01g36130.1,Orysa4|Os01g36220.1,Orysa4|Os03g19370.1,Orysa4|Os03g47200.1,Orysa4|Os03g56010.1  
AT3G62420 Orysa4|Os05g03860.1,Orysa4|Os12g37410.1  
Orysa4|Os08g35710.1  
AT1G02180 Orysa4|Os02g58740.1  
AT3G60440,AT3G60430,AT3G60450,AT3G60420 Orysa4|Os03g01180.1  
AT5G46020 Orysa4|Os01g54920.1  
Orysa4|Os05g43970.1  
AT2G38570 Orysa4|Os03g21630.1  
AT1G21810,AT1G77580,AT3G05270 Orysa4|Os11g06910.1,Orysa4|Os12g07160.1,Orysa4|Os07g32340.1  
AT2G23360 Orysa4|Os04g42610.1,Orysa4|Os02g40100.1,Orysa4|Os04g55570.1  
AT1G19835,AT1G47900,AT2G24470,AT4G36120 Orysa4|Os10g07480.1,Orysa4|Os03g14250.1

AT5G39790 Orysa4|Os02g04330.1  
AT1G33230,AT4G10430 Orysa4|Os08g05660.1,Orysa4|Os02g01720.1  
AT1G29820,AT1G29830,AT2G42950 Orysa4|Os01g41720.1,Orysa4|Os01g47460.1  
Orysa4|Os02g17920.1  
Orysa4|Os05g14194.1  
AT1G67280  
AT1G11840Orysa4|Os08g09250.1  
AT3G55280,AT2G39460 Orysa4|Os01g24690.1,Orysa4|Os04g42270.1  
AT4G28290 Orysa4|Os10g07440.1,Orysa4|Os10g07450.1  
AT1G22860 Orysa4|Os05g01360.1  
Orysa4|Os01g32964.1  
AT1G68410  
Orysa4|Os03g27780.1  
AT1G09160 Orysa4|Os03g18970.1,Orysa4|Os07g49040.1  
AT1G47380 Orysa4|Os04g37660.1,Orysa4|Os02g35910.1,Orysa4|Os09g28560.1  
AT4G27920  
Orysa4|Os05g12260.1  
Orysa4|Os02g15620.1  
AT4G01026,AT1G01360  
AT5G53160  
AT5G45860,AT5G45870,AT4G18620,AT2G40330,AT2G38310,AT5G05440  
Orysa4|Os05g39580.1,Orysa4|Os01g61210.1,Orysa4|Os03g18600.1  
AT1G73000,AT2G26040 Orysa4|Os06g36670.1,Orysa4|Os02g13330.1  
AT4G17870,AT5G46790 Orysa4|Os10g42280.1  
Orysa4|Os06g33690.1,Orysa4|Os06g33640.1,Orysa4|Os06g33480.1,Orysa4|Os02g15640.1  
AT5G67090 Orysa4|Os01g64850.1,Orysa4|Os05g36010.1  
AT1G04110Orysa4|Os03g04950.1  
AT5G51750  
Orysa4|Os02g22130.1  
AT5G45640,AT5G45650 Orysa4|Os01g52750.1  
AT4G30020,AT2G19170 Orysa4|Os06g48650.1  
AT2G39850  
Orysa4|Os03g31630.1,Orysa4|Os07g48650.1,Orysa4|Os05g30580.1  
AT3G14067 Orysa4|Os02g53860.1  
Orysa4|Os07g27850.1  
AT1G01900  
Orysa4|Os04g47150.1,Orysa4|Os02g44590.1,Orysa4|Os04g10360.1  
AT4G00230,AT5G03620,AT5G58820,AT5G58830,AT5G58840,AT5G59090,AT5G59120,AT5G59130,AT3G46840,AT3G46850,AT5G59100,AT5G59190,AT4G15040  
Orysa4|Os04g03802.1  
AT5G59810,AT2G04160 Orysa4|Os09g30250.1,Orysa4|Os02g10520.1  
Orysa4|Os04g03660.1  
Orysa4|Os09g26920.1  
Orysa4|Os04g03796.1  
AT5G59110  
Orysa4|Os04g47160.1  
Orysa4|Os02g49070.1  
AT1G32980  
Orysa4|Os04g35140.1  
Orysa4|Os07g31830.1,Orysa4|Os04g03050.1,Orysa4|Os07g31720.1  
AT4G05330,AT4G21160 Orysa4|Os06g40700.1,Orysa4|Os02g10480.1  
AT2G01540,AT1G70790,AT1G70800,AT1G70810,AT1G23140,AT3G17980,AT1G48590,AT1G73580,AT5G37740,AT1G66360  
AT3G07940 Orysa4|Os05g31720.1,Orysa4|Os01g72230.1  
AT1G20160,AT1G20150  
Orysa4|Os04g02990.1  
Orysa4|Os02g53910.1,Orysa4|Os02g53970.1,Orysa4|Os02g53850.1  
Orysa4|Os02g17000.1  
Orysa4|Os04g02970.1,Orysa4|Os10g41880.1  
Orysa4|Os09g07800.1,Orysa4|Os11g15530.1  
AT5G67360 Orysa4|Os03g40830.1,Orysa4|Os03g55350.1  
Orysa4|Os09g36110.1  
Orysa4|Os07g01770.1  
AT4G34980 Orysa4|Os03g13930.1  
AT5G47710  
Orysa4|Os07g39020.1  
Orysa4|Os02g53840.1  
Orysa4|Os06g41880.1  
Orysa4|Os04g45960.1  
AT4G10520,AT4G10530,AT4G10510,AT4G10540,AT4G10550,AT1G32950,AT1G32960,AT1G32940,AT1G32970,AT4G21640,AT4G21630,AT4G21650,AT1G66210,AT1G66220,AT4G21326,AT5G11940,AT4G21323  
Orysa4|Os01g58260.1,Orysa4|Os01g58240.1,Orysa4|Os01g58280.1,Orysa4|Os01g58290.1,Orysa4|Os02g16940.1,Orysa4|Os02g17090.1,Orysa4|Os02g17060.1,Orysa4|Os02g17080.1,Orysa4|Os04g03810.1,Orysa4|Os04g02980.1,Orysa4|Os04g03060.1,Orysa4|Os04g03100.1,Orysa4|Os11g15520.1  
Orysa4|Os01g50680.1  
AT4G26330 Orysa4|Os03g06290.1  
AT4G20430,AT5G44530 Orysa4|Os01g56320.1  
AT1G62340  
Orysa4|Os04g03850.1  
Orysa4|Os07g01780.1  
AT1G30600  
AT3G14240 Orysa4|Os08g35090.1

Orysa4|Os12g23980.1  
AT2G05920 Orysa4|Os10g25450.1  
AT1G04620 Orysa4|Os04g25400.1  
Orysa4|Os05g23890.1,Orysa4|Os03g05240.1  
AT3G60310 Orysa4|Os06g05640.1  
AT1G72500,AT1G19110 Orysa4|Os07g42280.1,Orysa4|Os03g29350.1,Orysa4|Os01g03970.1  
AT4G10920,AT4G00980 Orysa4|Os01g50960.1  
AT4G31740,AT2G17980 Orysa4|Os03g42320.1  
AT1G54530  
Orysa4|Os09g30506.1,Orysa4|Os09g31000.1,Orysa4|Os09g31040.1,Orysa4|Os10g02680.1,Orysa4|Os08  
g39290.1  
Orysa4|Os11g30180.1,Orysa4|Os03g29770.1  
AT2G44310  
AT4G27900,AT5G53420 Orysa4|Os05g51690.1  
AT1G11570,Orysa4|Os08g42000.1  
AT1G27310,AT1G27970  
Orysa4|Os07g22600.1  
AT5G53120 Orysa4|Os02g15550.1,Orysa4|Os06g33710.1  
AT1G70310,AT1G23820  
AT4G03200 Orysa4|Os01g70950.1  
AT5G62390 Orysa4|Os02g01520.1,Orysa4|Os06g01500.1  
AT2G34150,AT1G29170,AT4G18600 Orysa4|Os01g11040.1  
Orysa4|Os02g51120.1  
AT1G65910  
AT3G56530 Orysa4|Os11g04960.1  
Orysa4|Os05g34310.1,Orysa4|Os02g12310.1  
AT1G03490 Orysa4|Os03g18729.1,Orysa4|Os08g06140.1  
AT5G04410,AT3G10500  
Orysa4|Os05g34600.1  
AT5G08790,AT5G63790  
Orysa4|Os07g12340.1,Orysa4|Os01g60020.1  
Orysa4|Os10g33760.1,Orysa4|Os04g43560.1,Orysa4|Os02g41450.1  
Orysa4|Os11g34340.1,Orysa4|Os06g33940.1  
AT1G61110  
AT1G01720,AT1G77450 Orysa4|Os01g66120.1,Orysa4|Os05g34830.1  
AT5G14000 Orysa4|Os11g31380.1,Orysa4|Os11g31330.1,Orysa4|Os11g31360.1,Orysa4|Os11g31340.1  
Orysa4|Os06g01230.1  
AT3G44290,AT5G22290,AT2G27300,AT1G33060,AT4G35580,AT5G24590,AT3G49530  
AT1G12260,AT1G62700 Orysa4|Os02g42970.1  
AT4G28530 Orysa4|Os02g56600.1  
Orysa4|Os04g08730.1  
Orysa4|Os02g06950.1  
Orysa4|Os09g38010.1  
Orysa4|Os03g21030.1,Orysa4|Os07g48550.1  
AT3G04420,AT1G02220,AT1G02250,AT1G01010  
Orysa4|Os01g59640.1  
Orysa4|Os01g01470.1,Orysa4|Os01g29840.1  
Orysa4|Os11g08210.1  
AT2G43000  
AT3G18400,AT5G53950,AT3G15170  
Orysa4|Os04g45340.1  
Orysa4|Os09g33490.1,Orysa4|Os08g42400.1,Orysa4|Os01g70110.1,Orysa4|Os08g33670.1  
AT3G56520,AT5G41090  
Orysa4|Os11g29430.1  
AT1G56010 Orysa4|Os08g10080.1,Orysa4|Os06g46270.1  
Orysa4|Os05g43960.1  
Orysa4|Os04g52810.1  
AT1G69490  
Orysa4|Os04g59470.1  
AT5G46590,AT4G17980,AT1G32510 Orysa4|Os10g42130.1  
AT5G64530  
Orysa4|Os03g42630.1  
Orysa4|Os12g43530.1  
AT3G12910  
Orysa4|Os07g04560.1,Orysa4|Os03g56580.1  
Orysa4|Os06g01480.1  
AT3G17730 Orysa4|Os09g38000.1  
Orysa4|Os07g37920.1  
AT4G10350,AT1G33280  
AT2G17040 Orysa4|Os03g04070.1,Orysa4|Os06g51070.1  
Orysa4|Os11g45950.1  
Orysa4|Os08g02300.1  
AT2G24430 Orysa4|Os09g32260.1  
AT1G26870  
Orysa4|Os12g03050.1,Orysa4|Os11g03310.1,Orysa4|Os11g03370.1  
AT2G02450 Orysa4|Os01g66490.1  
AT1G34180,AT1G34190,AT1G32870 Orysa4|Os09g32040.1  
Orysa4|Os06g23650.1  
AT1G64105,AT5G18300,AT1G19040  
AT2G18060,AT4G36160,AT5G66300 Orysa4|Os10g38834.1,Orysa4|Os03g03540.1  
AT1G76420 Orysa4|Os08g40030.1  
Orysa4|Os03g02800.1

AT5G13180,AT2G33480 Orysa4|Os12g29330.1  
Orysa4|Os04g35660.1,Orysa4|Os02g34970.1  
Orysa4|Os11g03300.1  
Orysa4|Os10g21560.1  
AT5G18270,AT3G04060  
Orysa4|Os08g33910.1  
Orysa4|Os08g44820.1  
Orysa4|Os12g41680.1  
AT5G22380,AT3G44350 Orysa4|Os05g37080.1,Orysa4|Os01g64310.1,Orysa4|Os12g05990.1  
AT5G39820  
Orysa4|Os07g48450.1  
AT1G79580 Orysa4|Os02g15340.1  
AT3G03200,AT5G17260  
Orysa4|Os08g02160.1  
AT5G64060,AT5G09330  
AT5G50820  
AT5G62380  
AT1G32770,AT2G46770,AT3G61910  
Orysa4|Os03g47902.1  
AT3G12977 Orysa4|Os11g31370.1  
AT3G10480,AT3G10490  
AT4G01540,AT4G01520,AT4G01550,AT3G04430 Orysa4|Os01g15640.1  
AT5G04400 Orysa4|Os03g01870.1  
AT1G52880,AT3G15510  
AT1G71930 Orysa4|Os08g01330.1  
Orysa4|Os04g27750.1,Orysa4|Os03g14820.1  
AT3G04070  
AT1G54330  
Orysa4|Os06g04090.1  
AT5G61430,AT5G07680,AT3G29035,AT5G39610 Orysa4|Os02g36880.1,Orysa4|Os04g38720.1  
AT1G52890,AT3G15500,AT4G27410  
AT2G25625 Orysa4|Os05g49940.1  
AT2G22425,AT4G40042 Orysa4|Os12g25210.1  
AT1G66160,AT5G37490,AT3G02840  
Orysa4|Os02g50460.1,Orysa4|Os06g13870.1,Orysa4|Os10g03440.1,Orysa4|Os03g13740.1  
Orysa4|Os06g32710.1  
AT3G52450,AT2G35930,AT3G11840  
Orysa4|Os02g12410.1,Orysa4|Os04g49970.1,Orysa4|Os02g46500.1,Orysa4|Os12g06410.1  
Orysa4|Os01g64570.1,Orysa4|Os04g58920.1,Orysa4|Os12g08290.1,Orysa4|Os11g36490.1,Orysa4|Os02g33590.1,Orysa4|Os04g34030.1  
AT2G41120  
Orysa4|Os11g03580.1,Orysa4|Os12g03350.1,Orysa4|Os05g22630.1  
AT5G52780 Orysa4|Os10g38910.1  
AT4G19100 Orysa4|Os06g21530.1  
AT2G13360 Orysa4|Os08g39300.1  
AT5G62650 Orysa4|Os01g12550.1  
AT2G30400,AT1G06920  
AT3G52525 Orysa4|Os01g32810.1,Orysa4|Os03g21870.1,Orysa4|Os07g48150.1  
AT4G18830 Orysa4|Os01g54570.1  
AT5G58360  
AT5G01840 Orysa4|Os05g39950.1,Orysa4|Os01g60810.1,Orysa4|Os05g25910.1  
AT2G29570,AT1G07370 Orysa4|Os02g56130.1  
AT1G24340 Orysa4|Os01g67550.1  
Orysa4|Os02g52010.1,Orysa4|Os06g11660.1,Orysa4|Os02g52000.1,Orysa4|Os02g51970.1,Orysa4|Os06g11700.1,Orysa4|Os06g11680.1  
AT5G09440,AT5G64260 Orysa4|Os06g11650.1,Orysa4|Os08g37840.1  
AT4G08950,AT1G35140  
AT2G17230,AT2G35150  
AT3G02970  
AT5G51550 Orysa4|Os06g04250.1  
Orysa4|Os07g31430.1  
AT1G03880,AT5G44120,AT4G28520,AT1G03890  
Orysa4|Os10g26060.1,Orysa4|Os01g55690.1,Orysa4|Os03g31360.1,Orysa4|Os01g55630.1,Orysa4|Os02g15169.1,Orysa4|Os02g15178.1,Orysa4|Os02g15150.1,Orysa4|Os02g15070.1,Orysa4|Os02g16820.1,Orysa4|Os02g16830.1,Orysa4|Os02g15090.1,Orysa4|Os02g25860.1,Orysa4|Os02g25640.1,Orysa4|Os08g03410.1  
Orysa4|Os01g06454.1  
AT5G03030,AT3G09700  
AT2G35795  
Orysa4|Os03g56540.1  
AT1G80730  
AT1G66140,AT1G24625 Orysa4|Os03g13600.1  
AT5G48890 Orysa4|Os03g57240.1,Orysa4|Os07g05900.1,Orysa4|Os05g05970.1,Orysa4|Os12g42250.1  
AT5G57520  
Orysa4|Os12g39220.1,Orysa4|Os03g41110.1,Orysa4|Os07g40300.1  
Orysa4|Os09g38610.1,Orysa4|Os08g44190.1,Orysa4|Os08g17640.1,Orysa4|Os02g08510.1,Orysa4|Os04g36650.1,Orysa4|Os09g26100.1,Orysa4|Os09g26200.1,Orysa4|Os09g26050.1,Orysa4|Os09g26210.1  
AT3G54390 Orysa4|Os09g38570.1  
AT2G22870 Orysa4|Os03g13000.1  
AT5G11480 Orysa4|Os01g53150.1  
AT2G26240,AT3G43520  
Orysa4|Os04g55930.1  
AT2G02810,AT1G14360 Orysa4|Os06g39260.1

AT2G25730 Orysa4|Os01g40990.1  
AT3G19150,AT1G49620,AT2G23430 Orysa4|Os11g40030.1,Orysa4|Os06g11050.1  
AT1G70340,AT1G23790  
Orysa4|Os04g39330.1,Orysa4|Os01g01890.1  
AT3G14170 Orysa4|Os03g08390.1  
AT3G19610,AT2G31920  
AT1G08760 Orysa4|Os08g42870.1,Orysa4|Os09g34110.1,Orysa4|Os11g16400.1  
AT4G13370 Orysa4|Os12g02710.1,Orysa4|Os11g02740.1  
Orysa4|Os11g37480.1  
AT5G17770 Orysa4|Os01g59930.1,Orysa4|Os05g40990.1  
AT5G20080 Orysa4|Os01g07910.1  
AT1G67080 Orysa4|Os01g03750.1  
Orysa4|Os02g48010.1  
AT1G67230,AT1G13220,AT1G68790  
AT5G65770 Orysa4|Os01g56140.1  
Orysa4|Os04g28690.1  
AT4G33790,AT3G44550,AT3G44560,AT5G22500,AT3G44540,AT5G22420  
Orysa4|Os08g44360.1,Orysa4|Os09g39410.1,Orysa4|Os08g20200.1,Orysa4|Os07g30600.1  
AT3G56700,AT3G60060  
AT3G11980Orysa4|Os03g07140.1  
Orysa4|Os04g28600.1,Orysa4|Os07g23380.1,Orysa4|Os04g28520.1,Orysa4|Os04g28620.1  
Orysa4|Os04g28680.1  
Orysa4|Os07g23340.1  
AT5G66010 Orysa4|Os12g03710.1,Orysa4|Os11g03890.1  
AT3G20890  
Orysa4|Os03g51820.1  
Orysa4|Os11g38020.1  
AT5G57960  
Orysa4|Os08g30780.1  
AT5G61690,AT5G61730,AT3G47730 Orysa4|Os08g30740.1  
AT5G61740,AT5G61700,AT3G47760,AT3G47750,AT3G47770,AT3G47780,AT3G47740,AT3G47790  
Orysa4|Os09g19680.1,Orysa4|Os08g30770.1  
Orysa4|Os02g01820.1,Orysa4|Os02g11960.1  
Orysa4|Os06g38950.1  
AT2G41700  
AT2G29410  
AT3G61940,AT2G46800 Orysa4|Os05g03780.1  
AT3G63100  
AT3G58810  
AT1G64510 Orysa4|Os03g62630.1  
AT5G07920 Orysa4|Os12g38780.1  
AT5G63770 Orysa4|Os12g12260.1  
AT5G02830 Orysa4|Os03g17634.1  
AT4G17600,AT5G47110 Orysa4|Os02g03330.1  
AT2G22940 Orysa4|Os11g19500.1,Orysa4|Os09g26470.1  
AT5G37560,AT2G21420,AT2G25380,AT3G45470,AT2G25370,AT2G25360,AT5G60250,AT3G45500,AT3G45490,AT3G45525,AT2G16520,AT3G45480,AT3G45510,AT3G43180,AT3G45560,AT3G45460,AT3G45580,AT3G45570,AT3G43750,AT3G45555,AT3G45540,AT2G26135,AT2G26130,AT5G07640,AT2G19610  
AT3G53690  
AT3G14250 Orysa4|Os09g11170.1,Orysa4|Os08g35060.1  
Orysa4|Os09g25260.1,Orysa4|Os09g25220.1,Orysa4|Os09g25200.1,Orysa4|Os09g25190.1  
AT1G80500 Orysa4|Os04g42500.1  
AT1G02100 Orysa4|Os06g04820.1  
AT2G22250 Orysa4|Os01g65090.1  
Orysa4|Os02g49992.1  
AT1G23230  
AT2G36590,AT2G39890,AT3G55740 Orysa4|Os03g44230.1,Orysa4|Os07g01090.1  
Orysa4|Os01g68050.1  
AT1G54150 Orysa4|Os03g08000.1  
AT5G47890 Orysa4|Os04g24520.1  
AT1G69340 Orysa4|Os03g05660.1,Orysa4|Os10g30750.1  
AT5G64680 Orysa4|Os01g15520.1,Orysa4|Os08g32690.1  
AT1G63770 Orysa4|Os08g44860.1  
AT5G52200 Orysa4|Os05g23610.1  
Orysa4|Os02g39030.1  
AT4G11640Orysa4|Os04g46930.1  
AT4G17650 Orysa4|Os01g56560.1  
Orysa4|Os03g13970.1  
AT4G38630 Orysa4|Os10g05180.1  
AT5G22340  
Orysa4|Os03g20640.1  
Orysa4|Os05g02110.1,Orysa4|Os03g16760.1  
Orysa4|Os02g18150.1  
AT2G46920  
AT3G16560 Orysa4|Os04g33080.1  
AT5G02400,AT3G09400,AT2G28890,AT1G07630 Orysa4|Os03g60650.1  
AT2G35350 Orysa4|Os02g46490.1  
AT4G04930 Orysa4|Os02g42660.1  
Orysa4|Os11g04240.1  
AT1G03280,AT4G20340,AT4G20810  
Orysa4|Os12g04060.1,Orysa4|Os11g04230.1  
AT3G04820 Orysa4|Os01g56620.1,Orysa4|Os05g43370.1

AT2G23670 Orysa4|Os02g57020.1  
AT4G27390 Orysa4|Os05g42280.1  
AT5G46840 Orysa4|Os03g63730.1  
AT3G63490  
Orysa4|Os05g32220.1  
AT2G42710 Orysa4|Os03g30670.1,Orysa4|Os06g35470.1  
AT5G11450Orysa4|Os01g43070.1  
Orysa4|Os01g59610.1  
AT3G61980,AT4G01575  
AT2G35610 Orysa4|Os03g38930.1  
AT4G13140 Orysa4|Os02g09440.1  
AT2G29990,AT1G07180 Orysa4|Os01g61410.1  
Orysa4|Os05g02380.1  
AT1G44835 Orysa4|Os02g52880.1  
AT4G28370,AT2G20650  
Orysa4|Os07g31850.1  
AT3G54630 Orysa4|Os08g36490.1  
Orysa4|Os12g42960.1  
AT3G03970  
AT1G54385 Orysa4|Os11g37100.1  
AT2G17410,AT1G76510,AT1G20910 Orysa4|Os06g41730.1  
Orysa4|Os02g48370.1  
Orysa4|Os02g37910.1  
AT5G42370  
AT5G45710,AT4G18880 Orysa4|Os01g54550.1  
AT1G46264  
Orysa4|Os03g63750.1  
Orysa4|Os08g43334.1  
AT2G41690  
AT3G02990,AT5G16820  
Orysa4|Os06g22610.1,Orysa4|Os03g53340.1  
Orysa4|Os11g08970.1  
Orysa4|Os06g35960.1,Orysa4|Os02g13800.1  
AT4G13980 Orysa4|Os02g29340.1  
Orysa4|Os06g36930.1,Orysa4|Os01g39020.1  
AT5G54070  
AT4G11660,AT5G62020  
Orysa4|Os03g25120.1,Orysa4|Os07g44690.1  
Orysa4|Os09g28200.1,Orysa4|Os08g36700.1  
AT1G32330,AT4G17750  
AT2G26150  
AT4G36990  
Orysa4|Os04g48030.1  
Orysa4|Os05g45410.1  
AT1G67970 Orysa4|Os03g12370.1  
AT3G24520 Orysa4|Os01g43590.1,Orysa4|Os01g53220.1  
AT5G43840  
AT3G22830,AT3G63350,AT3G51910  
Orysa4|Os03g06630.1,Orysa4|Os10g28340.1,Orysa4|Os03g58160.1,Orysa4|Os07g08140.1  
Orysa4|Os09g35790.1  
AT5G03720 Orysa4|Os02g32590.1  
AT4G19630,AT1G77570,AT4G18870  
Orysa4|Os09g28354.1  
Orysa4|Os06g28740.1  
AT5G57230  
AT1G21760 Orysa4|Os04g35190.1  
AT3G21160,AT1G51590 Orysa4|Os04g51690.1  
AT1G30000 Orysa4|Os05g11850.1  
AT1G07130 Orysa4|Os03g25130.1  
AT2G25940,AT4G32940 Orysa4|Os01g37910.1  
AT1G62710 Orysa4|Os04g45470.1,Orysa4|Os02g43010.1  
AT3G20210 Orysa4|Os06g01610.1,Orysa4|Os05g51570.1  
AT4G11270Orysa4|Os06g22550.1  
AT3G54350,AT1G75530,AT1G60700 Orysa4|Os07g09320.1,Orysa4|Os03g58640.1  
AT4G08320  
Orysa4|Os06g06470.1,Orysa4|Os06g06450.1,Orysa4|Os06g06760.1  
AT4G12400,AT1G12270,AT1G62740 Orysa4|Os02g43020.1,Orysa4|Os04g45480.1  
AT1G10610  
Orysa4|Os03g46860.1,Orysa4|Os12g43620.1,Orysa4|Os03g46790.1  
AT4G17880,AT5G46760,AT1G32640,AT5G46830 Orysa4|Os10g42430.1  
AT2G28160 Orysa4|Os04g31290.1  
AT4G21330  
AT2G22760,AT2G22770,AT2G22750,AT4G37850 Orysa4|Os03g51580.1  
Orysa4|Os09g34330.1  
AT1G01260,AT2G46510 Orysa4|Os01g13460.1,Orysa4|Os01g50940.1  
Orysa4|Os10g01530.1  
AT4G16430  
AT4G00870  
AT5G53050 Orysa4|Os02g19650.1,Orysa4|Os05g46460.1  
AT5G57770 Orysa4|Os08g30350.1,Orysa4|Os12g41140.1  
AT5G47440,AT4G17350,AT4G16670 Orysa4|Os02g44040.1,Orysa4|Os10g41060.1  
Orysa4|Os10g41870.1

Orysa4|Os01g13070.1  
AT4G32780  
AT3G63300,AT4G14740,AT3G22810,AT5G43870  
AT4G32785 Orysa4|Os04g42040.1  
AT1G55000 Orysa4|Os03g49250.1  
Orysa4|Os01g29820.1  
AT4G10180 Orysa4|Os01g01484.1  
AT3G22660 Orysa4|Os07g29320.1  
AT3G55770,AT2G39900  
Orysa4|Os12g32620.1  
Orysa4|Os03g15940.1  
AT3G61230,AT2G45800,AT1G01780 Orysa4|Os04g45010.1,Orysa4|Os02g42820.1,Orysa4|Os10g35930.1  
Orysa4|Os06g13030.1  
AT1G10200  
AT1G12650 Orysa4|Os09g35670.1  
Orysa4|Os06g04630.1  
AT3G04520,AT1G08630 Orysa4|Os04g43650.1  
Orysa4|Os05g28800.1  
AT1G72570  
AT1G79700,AT1G16060  
Orysa4|Os06g43220.1  
Orysa4|Os05g32270.1,Orysa4|Os07g39110.1  
AT5G17430  
Orysa4|Os06g05340.1  
AT2G41710  
Orysa4|Os06g44770.1,Orysa4|Os06g44750.1,Orysa4|Os03g19900.1  
Orysa4|Os07g03250.1  
AT5G57390  
Orysa4|Os01g67410.1  
AT2G28550 Orysa4|Os05g03040.1  
Orysa4|Os04g55970.1  
Orysa4|Os02g51300.1,Orysa4|Os08g07440.1  
Orysa4|Os12g03290.1,Orysa4|Os11g03540.1  
AT3G54320  
AT3G20840,AT1G51190  
Orysa4|Os03g07940.1  
Orysa4|Os02g40070.1,Orysa4|Os04g42570.1,Orysa4|Os03g37710.1  
Orysa4|Os03g12950.1  
AT4G37750  
Orysa4|Os04g55560.1  
AT5G67180,AT4G36920  
Orysa4|Os08g34360.1,Orysa4|Os09g25600.1  
AT3G54990,AT2G39250,AT5G60120  
Orysa4|Os01g59780.1  
Orysa4|Os03g56050.1  
Orysa4|Os07g13170.1,Orysa4|Os03g60430.1  
AT5G10510,AT5G65510  
Orysa4|Os11g19060.1  
AT2G41530 Orysa4|Os01g71300.1  
Orysa4|Os07g08210.1  
AT2G18250 Orysa4|Os02g04120.1  
AT4G29560 Orysa4|Os06g37570.1  
AT4G19980 Orysa4|Os02g07460.1  
Orysa4|Os09g33470.1,Orysa4|Os02g13170.1  
AT2G39970 Orysa4|Os03g15860.1  
AT1G07320 Orysa4|Os03g15870.1  
Orysa4|Os05g44320.1  
AT1G15440  
Orysa4|Os08g39560.1,Orysa4|Os09g31280.1  
AT3G57810  
Orysa4|Os01g67490.1  
AT2G38025 Orysa4|Os03g15930.1  
AT5G20040 Orysa4|Os06g51350.1  
AT1G71740 Orysa4|Os02g11950.1  
AT2G06005,AT5G20580 Orysa4|Os02g53780.1  
AT3G23620 Orysa4|Os05g43130.1,Orysa4|Os01g33030.1  
AT1G59900,AT1G24180 Orysa4|Os02g50620.1,Orysa4|Os06g13720.1  
AT1G01090 Orysa4|Os04g02900.1  
AT3G17000 Orysa4|Os03g19500.1  
AT1G77680 Orysa4|Os02g51780.1  
AT2G26350 Orysa4|Os07g41800.1  
AT1G50950,AT3G20560,AT4G27080 Orysa4|Os07g34030.1  
Orysa4|Os09g17830.1,Orysa4|Os09g17840.1,Orysa4|Os03g11440.1  
Orysa4|Os12g43070.1,Orysa4|Os09g33770.1,Orysa4|Os12g43080.1,Orysa4|Os12g43300.1,Orysa4|Os12g41840.1,Orysa4|Os09g33720.1,Orysa4|Os03g48590.1  
AT1G78720  
AT2G34250,AT1G29310  
AT3G03690 Orysa4|Os10g30080.1  
AT1G03520,AT4G03340 Orysa4|Os08g04790.1  
Orysa4|Os03g05180.1  
AT2G37585 Orysa4|Os03g16890.1  
Orysa4|Os01g56570.1

AT5G39990,AT5G15050 Orysa4|Os03g48560.1,Orysa4|Os12g44240.1  
AT3G24040  
AT1G71070 Orysa4|Os05g06050.1,Orysa4|Os01g03160.1  
Orysa4|Os06g40060.1  
AT1G53100,AT3G15350,AT4G27480 Orysa4|Os01g10440.1  
AT3G55600,AT1G54110 Orysa4|Os09g10000.1,Orysa4|Os08g42110.1  
AT5G53045 Orysa4|Os08g42210.1,Orysa4|Os02g20330.1,Orysa4|Os02g20280.1  
AT5G20660 Orysa4|Os04g43916.1  
AT1G07830 Orysa4|Os06g03790.1  
AT4G14120,AT3G23740 Orysa4|Os01g01170.1  
AT2G40550 Orysa4|Os01g07260.1  
AT1G19120  
AT3G14080 Orysa4|Os04g36810.1  
Orysa4|Os06g35420.1,Orysa4|Os07g03760.1,Orysa4|Os06g49020.1  
AT5G23540 Orysa4|Os05g30800.1,Orysa4|Os01g16190.1  
AT1G30520  
AT4G19010 Orysa4|Os10g42800.1  
AT1G62940 Orysa4|Os04g24530.1  
AT3G48990 Orysa4|Os04g58710.1  
AT1G20490,AT1G20500  
AT1G65060 Orysa4|Os02g46970.1  
AT5G63380 Orysa4|Os01g67530.1,Orysa4|Os01g67540.1,Orysa4|Os07g17970.1  
AT1G51680,AT3G21240,AT3G21230  
Orysa4|Os06g44620.1,Orysa4|Os02g08100.1,Orysa4|Os08g14760.1,Orysa4|Os08g34790.1  
AT4G05160 Orysa4|Os03g05780.1  
AT1G20510,AT1G20480,AT5G38120 Orysa4|Os03g04000.1  
Orysa4|Os07g44560.1  
AT3G16170  
AT1G58280  
AT1G09932,AT1G09935  
AT5G64460  
AT2G17280 Orysa4|Os04g01230.1  
AT3G53950  
AT1G67290,AT5G19580 Orysa4|Os05g48520.1,Orysa4|Os01g48540.1  
AT1G14430,AT3G57620  
Orysa4|Os11g06870.1  
AT1G75620,AT1G19900 Orysa4|Os03g15320.1  
AT4G16447 Orysa4|Os10g21860.1  
AT3G14990,AT1G53280  
Orysa4|Os01g11860.1  
Orysa4|Os06g34040.1  
AT4G34020 Orysa4|Os05g44330.1  
AT5G37340,AT5G22480 Orysa4|Os08g36774.1  
AT3G24830,AT3G07110,AT4G13170,AT5G48760  
Orysa4|Os03g54860.1,Orysa4|Os03g54890.1,Orysa4|Os07g01870.1  
AT3G01750 Orysa4|Os09g36690.1,Orysa4|Os02g38970.1  
AT3G04140 Orysa4|Os05g23320.1  
Orysa4|Os06g44790.1,Orysa4|Os06g44840.1  
Orysa4|Os06g43880.1  
AT2G18950  
Orysa4|Os01g42470.1  
AT5G11340  
AT5G01570,AT3G08880 Orysa4|Os04g36780.1  
AT2G43030  
Orysa4|Os02g04460.1  
AT5G54410  
AT5G25870  
AT4G36700,AT2G18540 Orysa4|Os03g10110.1  
AT3G55470 Orysa4|Os01g62430.1  
AT1G63220 Orysa4|Os02g42710.1,Orysa4|Os04g44870.1  
Orysa4|Os02g44560.1  
AT5G51220 Orysa4|Os07g30790.1  
Orysa4|Os12g13930.1  
AT3G26760,AT3G26770,AT4G03140  
Orysa4|Os07g46830.1,Orysa4|Os07g46840.1,Orysa4|Os07g46930.1,Orysa4|Os07g46920.1,Orysa4|Os07g46980.1,Orysa4|Os07g46970.1,Orysa4|Os07g46940.1,Orysa4|Os07g40250.1,Orysa4|Os07g46852.1,Orysa4|Os07g46846.1,Orysa4|Os07g46870.1,Orysa4|Os07g46860.1,Orysa4|Os12g16010.1,Orysa4|Os11g32030.1  
AT5G10050,AT5G65205 Orysa4|Os04g38420.1  
AT3G42960  
AT3G05260,AT1G54870 Orysa4|Os05g04870.1  
AT1G52340 Orysa4|Os03g59610.1  
AT1G62610,AT1G63380,AT3G55290,AT3G55310,AT3G46170,AT2G17845 Orysa4|Os08g39960.1  
AT1G10310 Orysa4|Os02g35170.1  
AT3G29250,AT3G29260,AT2G47130,AT2G47120,AT2G47140,AT2G47150 Orysa4|Os03g61740.1  
Orysa4|Os02g30060.1,Orysa4|Os04g30760.1  
AT3G51680 Orysa4|Os07g49120.1,Orysa4|Os03g18740.1  
Orysa4|Os04g10010.1,Orysa4|Os04g10000.1,Orysa4|Os04g33240.1  
AT3G03980,AT5G18210,AT3G04000,AT4G13180  
Orysa4|Os07g37420.1,Orysa4|Os07g07450.1,Orysa4|Os10g31780.1,Orysa4|Os06g08600.1,Orysa4|Os03g53690.1  
AT3G23580  
AT5G40942,AT3G27060



Orysa4|Os06g14620.1,Orysa4|Os06g03720.1  
AT2G42110Orysa4|Os03g03630.1  
AT3G05990 Orysa4|Os05g32660.1  
AT3G19230 Orysa4|Os09g28470.1,Orysa4|Os03g08610.1  
AT5G15380,AT5G14620 Orysa4|Os12g01800.1,Orysa4|Os03g02010.1,Orysa4|Os11g01810.1  
AT3G17310 Orysa4|Os05g04330.1  
AT4G31120Orysa4|Os02g04660.1  
AT3G59780  
Orysa4|Os05g37000.1  
Orysa4|Os01g67120.1  
Orysa4|Os10g39990.1  
Orysa4|Os10g40010.1  
Orysa4|Os11g07930.1,Orysa4|Os11g07922.1  
AT4G09750 Orysa4|Os06g39040.1  
AT5G02540,AT2G37540 Orysa4|Os01g05840.1  
AT4G24050,AT1G64590 Orysa4|Os06g03830.1,Orysa4|Os03g02460.1  
AT4G11410,AT4G23430,AT4G23420  
AT5G50130  
Orysa4|Os10g40000.1,Orysa4|Os10g40020.1,Orysa4|Os10g40030.1,Orysa4|Os04g22380.1  
AT5G04070,AT5G15940 Orysa4|Os09g17750.1  
AT4G01050 Orysa4|Os02g15750.1  
AT3G25480 Orysa4|Os01g66600.1  
AT3G58800 Orysa4|Os02g13650.1  
AT1G73930 Orysa4|Os03g15390.1  
AT1G55970,AT3G12980  
AT1G67220 Orysa4|Os01g14370.1  
AT1G16705  
Orysa4|Os06g49130.1,Orysa4|Os02g04490.1  
AT1G79000,AT1G16710  
AT2G17510 Orysa4|Os03g03710.1  
AT3G55010 Orysa4|Os03g61600.1  
Orysa4|Os05g04850.1  
AT1G51510  
Orysa4|Os03g59550.1  
AT4G22310,AT4G05590,AT4G14695 Orysa4|Os08g25590.1,Orysa4|Os07g26700.1,Orysa4|Os07g36800.1  
AT5G43050  
Orysa4|Os04g41150.1  
AT5G09850 Orysa4|Os11g06650.1  
AT5G42300 Orysa4|Os02g41820.1  
AT3G45180  
AT5G62220 Orysa4|Os04g48480.1,Orysa4|Os06g23420.1  
AT4G22580 Orysa4|Os10g40559.1  
AT1G68470  
Orysa4|Os10g32110.1,Orysa4|Os10g32080.1,Orysa4|Os12g38450.1  
Orysa4|Os03g05070.1  
AT5G41250,AT1G63450  
Orysa4|Os01g16460.1,Orysa4|Os03g08420.1,Orysa4|Os10g26510.1  
Orysa4|Os12g12290.1  
AT2G20370 Orysa4|Os03g05110.1  
Orysa4|Os10g32170.1,Orysa4|Os10g32160.1  
AT4G13990,AT2G29040,AT2G32750,AT2G32740,AT2G31990  
AT2G42700 Orysa4|Os11g06810.1  
AT5G22410 Orysa4|Os09g15510.1,Orysa4|Os09g15500.1,Orysa4|Os10g41720.1  
AT5G58400,AT5G58390  
Orysa4|Os01g18890.1  
Orysa4|Os07g48020.1,Orysa4|Os07g48030.1,Orysa4|Os07g48050.1,Orysa4|Os07g48010.1,Orysa4|Os07  
g47990.1,Orysa4|Os03g22010.1  
Orysa4|Os10g39170.1  
AT3G50990  
AT4G30170,AT2G18980  
Orysa4|Os04g06860.1,Orysa4|Os05g42000.1,Orysa4|Os07g01420.1  
Orysa4|Os01g18910.1,Orysa4|Os05g04450.1  
AT4G21960  
Orysa4|Os06g33090.1  
Orysa4|Os07g01380.1  
AT2G22420 Orysa4|Os09g29490.1  
Orysa4|Os07g44460.1,Orysa4|Os07g44499.1,Orysa4|Os07g44550.1,Orysa4|Os07g44590.1,Orysa4|Os03  
g25300.1,Orysa4|Os03g25320.1,Orysa4|Os03g25370.1,Orysa4|Os03g25360.1,Orysa4|Os03g25340.1,Orysa4|Os03g  
25330.1,Orysa4|Os05g04470.1,Orysa4|Os05g04500.1,Orysa4|Os05g04490.1  
AT4G25980,AT1G77100 Orysa4|Os11g10460.1,Orysa4|Os12g08920.1  
Orysa4|Os03g22020.1,Orysa4|Os07g48060.1  
AT5G05340 Orysa4|Os12g02080.1,Orysa4|Os11g02130.1  
AT1G71695 Orysa4|Os01g73170.1,Orysa4|Os01g73200.1,Orysa4|Os01g73220.1,Orysa4|Os01g73190.1  
AT1G14540,AT1G14550  
AT2G43480,AT5G24070,AT4G33870  
Orysa4|Os07g06286.1,Orysa4|Os07g06380.1,Orysa4|Os07g06175.1,Orysa4|Os01g18930.1,Orysa4|Os05  
g04380.1,Orysa4|Os05g04440.1,Orysa4|Os01g18970.1,Orysa4|Os04g04750.1,Orysa4|Os05g04410.1,Orysa4|Os10g  
39160.1,Orysa4|Os06g27850.1,Orysa4|Os03g05770.1  
AT4G26010,AT1G34510,AT5G17820,AT3G03670  
Orysa4|Os03g32060.1  
AT4G33420 Orysa4|Os08g02110.1  
Orysa4|Os07g34670.1

Orysa4|Os01g18900.1  
AT2G39040  
AT5G39580,AT5G64120,AT5G64100,AT5G64110  
Orysa4|Os10g01760.1  
Orysa4|Os03g32050.1,Orysa4|Os03g13180.1  
AT1G49570  
Orysa4|Os12g34524.1  
Orysa4|Os09g32964.1  
AT5G42180 Orysa4|Os02g58720.1  
Orysa4|Os09g13730.1,Orysa4|Os07g44600.1  
AT4G37530,AT4G37520,AT5G67400,AT3G49960 Orysa4|Os03g55420.1,Orysa4|Os07g02440.1  
AT5G66390,AT2G18140,AT2G18150,AT4G36430  
Orysa4|Os01g15830.1,Orysa4|Os01g36240.1,Orysa4|Os04g34630.1  
Orysa4|Os04g59260.1,Orysa4|Os04g59210.1,Orysa4|Os04g59200.1,Orysa4|Os04g59160.1,Orysa4|Os04g59150.1  
AT3G01190,AT5G15180,AT1G05240,AT1G05250  
Orysa4|Os06g20150.1,Orysa4|Os06g29470.1,Orysa4|Os11g43980.1,Orysa4|Os07g01370.1,Orysa4|Os05g41990.1,Orysa4|Os07g01400.1,Orysa4|Os04g53640.1  
AT5G19890 Orysa4|Os03g13210.1,Orysa4|Os10g02070.1  
AT1G30870 Orysa4|Os07g31610.1  
AT2G41480 Orysa4|Os01g07770.1  
AT5G14130  
Orysa4|Os01g16450.1  
Orysa4|Os02g21330.1  
Orysa4|Os01g22230.1,Orysa4|Os01g22249.1,Orysa4|Os01g22336.1,Orysa4|Os05g06970.1  
Orysa4|Os12g09460.1,Orysa4|Os12g40850.1  
AT3G21770,AT1G05260,AT4G11290 Orysa4|Os02g06630.1  
Orysa4|Os04g01550.1  
AT4G16270 Orysa4|Os08g20730.1  
AT5G51890  
AT1G44970 Orysa4|Os01g15810.1  
AT2G34060  
AT3G28200,AT5G40150,AT5G47000,AT4G17690,AT1G24110 Orysa4|Os02g50770.1  
Orysa4|Os07g34710.1,Orysa4|Os03g36560.1  
Orysa4|Os11g02100.1,Orysa4|Os12g02060.1,Orysa4|Os04g55740.1  
Orysa4|Os06g33080.1,Orysa4|Os06g33100.1,Orysa4|Os06g32990.1  
AT2G35380  
Orysa4|Os06g35480.1,Orysa4|Os06g35520.1,Orysa4|Os06g35490.1,Orysa4|Os02g14180.1,Orysa4|Os01g10850.1,Orysa4|Os02g14160.1,Orysa4|Os02g14170.1,Orysa4|Os02g14440.1,Orysa4|Os02g14430.1,Orysa4|Os02g14460.1  
Orysa4|Os10g33390.1,Orysa4|Os12g11800.1  
AT2G37130 Orysa4|Os07g49360.1  
Orysa4|Os06g48000.1,Orysa4|Os06g48010.1,Orysa4|Os06g48020.1,Orysa4|Os06g48030.1  
AT3G17070 Orysa4|Os05g14260.1  
Orysa4|Os03g55410.1  
AT4G08770,AT4G08780,AT3G49120,AT3G49110,AT3G32980,AT2G38390,AT2G38380,AT5G06730,AT5G06720,AT5G19880  
AT1G68850  
AT2G24800,AT4G31760 Orysa4|Os04g42100.1  
Orysa4|Os12g34810.1  
AT3G42570  
AT5G55110,AT4G26880,AT1G50720  
AT1G53130  
Orysa4|Os05g18940.1,Orysa4|Os01g14540.1  
AT1G11925  
AT1G50650  
AT3G17040 Orysa4|Os03g19560.1  
AT5G04420 Orysa4|Os02g57690.1  
Orysa4|Os12g35560.1  
AT5G27630,AT3G05420 Orysa4|Os03g61930.1  
AT3G04950 Orysa4|Os06g19480.1  
AT1G08660 Orysa4|Os11g36420.1  
AT3G48820 Orysa4|Os02g02620.1  
AT2G46140,AT1G01470 Orysa4|Os05g50710.1,Orysa4|Os01g43530.1,Orysa4|Os01g12580.1  
AT5G11100 Orysa4|Os08g20544.1  
AT2G21010,AT2G20990,AT1G20080 Orysa4|Os02g25060.1  
Orysa4|Os01g60340.1,Orysa4|Os09g36770.1  
AT5G04220 Orysa4|Os06g47130.1  
AT1G05500  
AT2G21040  
AT1G15230 Orysa4|Os09g17580.1  
AT2G16490  
Orysa4|Os03g39910.1  
Orysa4|Os12g38440.1  
AT4G00380,AT1G15910,AT1G80790  
AT3G29375 Orysa4|Os07g02240.1,Orysa4|Os04g21730.1  
AT4G01780,AT3G48670,AT3G12550,AT4G01180,AT5G59390,AT1G13790  
Orysa4|Os01g44230.1,Orysa4|Os01g03570.1,Orysa4|Os05g06130.1,Orysa4|Os03g39940.1,Orysa4|Os02g19130.1  
Orysa4|Os01g05440.1,Orysa4|Os01g05470.1  
AT1G25570 Orysa4|Os01g04720.1  
AT1G28340

AT4G30690,AT2G24060 Orysa4|Os02g55120.1  
AT5G28660,AT2G47370,AT2G16760 Orysa4|Os10g30620.1,Orysa4|Os03g19452.1,Orysa4|Os10g26190.1  
AT1G50080  
AT5G14140 Orysa4|Os11g30484.1  
AT4G39020  
AT1G31440 Orysa4|Os03g16000.1  
AT4G34660 Orysa4|Os04g45670.1  
AT4G18060 Orysa4|Os07g32460.1  
AT1G76110Orysa4|Os09g37250.1  
AT1G04880 Orysa4|Os02g27060.1  
AT1G55650,AT3G13350  
AT1G62530,AT1G12120 Orysa4|Os10g40580.1  
AT1G21630 Orysa4|Os06g51250.1  
AT1G20760  
Orysa4|Os03g03830.1  
AT4G30010 Orysa4|Os02g07910.1  
AT3G25610,AT1G13210,AT1G26130,AT1G68710 Orysa4|Os05g01030.1,Orysa4|Os06g29380.1  
AT3G18700  
Orysa4|Os03g21680.1  
Orysa4|Os03g20970.1  
Orysa4|Os09g03310.1,Orysa4|Os10g27220.1  
AT1G17500,AT1G72700,AT1G54280,AT3G13900  
Orysa4|Os03g20949.1,Orysa4|Os05g26990.1  
Orysa4|Os06g36990.1  
Orysa4|Os08g30380.1  
AT5G44240 Orysa4|Os11g25980.1  
Orysa4|Os08g29150.1  
AT5G04930 Orysa4|Os01g17010.1  
AT1G59820  
AT3G27870  
Orysa4|Os03g20958.1  
AT3G16200 Orysa4|Os01g31220.1  
AT1G48170 Orysa4|Os12g08230.1  
AT4G14950,AT1G05360 Orysa4|Os07g38380.1,Orysa4|Os01g57066.1  
AT1G76660 Orysa4|Os03g16400.1,Orysa4|Os01g01390.1  
AT5G44740 Orysa4|Os01g55300.1  
AT2G30700 Orysa4|Os10g38980.1  
AT1G61900  
AT5G63200 Orysa4|Os01g67920.1  
Orysa4|Os01g38580.1  
AT4G32810  
AT4G03380,AT1G03530 Orysa4|Os05g42300.1  
AT1G60390,AT1G23760,AT1G70370 Orysa4|Os08g29200.1,Orysa4|Os09g16010.1  
Orysa4|Os10g26940.1  
AT3G07080 Orysa4|Os06g46820.1  
AT4G17330 Orysa4|Os10g41030.1  
AT2G21790 Orysa4|Os06g07210.1  
AT5G20890 Orysa4|Os05g48290.1,Orysa4|Os03g42220.1  
AT3G02530,AT5G16070 Orysa4|Os05g05470.1  
AT1G24510 Orysa4|Os06g36700.1  
AT4G08640  
Orysa4|Os10g37060.1,Orysa4|Os02g22780.1  
AT1G67760  
AT3G03960 Orysa4|Os11g36950.1,Orysa4|Os03g59020.1  
Orysa4|Os06g21620.1  
AT5G26360 Orysa4|Os02g14929.1,Orysa4|Os06g34690.1  
AT3G20050  
AT3G11830Orysa4|Os06g47320.1  
AT3G18190  
Orysa4|Os04g23420.1  
Orysa4|Os09g36840.1  
AT5G10710 Orysa4|Os04g21610.1  
AT4G16340 Orysa4|Os03g21080.1  
Orysa4|Os10g05580.1  
AT5G51060,AT4G25090,AT5G47910,AT5G07390  
AT5G60010,AT3G45810 Orysa4|Os05g38980.1,Orysa4|Os01g61880.1  
AT1G19230 Orysa4|Os09g26660.1,Orysa4|Os08g35210.1  
AT1G09090 Orysa4|Os01g25820.1  
Orysa4|Os04g30680.1  
AT1G64060 Orysa4|Os01g53294.1,Orysa4|Os05g45210.1  
AT4G11230  
AT3G27720,AT3G27710  
AT5G63730,AT5G63750,AT5G63760,AT5G08730  
AT2G31760,AT2G31770,AT2G31780  
AT4G34370,AT2G16090 Orysa4|Os03g13100.1  
Orysa4|Os08g42740.1,Orysa4|Os09g33876.1  
AT2G31510,AT1G05890  
Orysa4|Os09g38640.1,Orysa4|Os09g38630.1  
Orysa4|Os03g42790.1,Orysa4|Os03g42760.1,Orysa4|Os03g42780.1  
AT1G05880  
AT1G65430  
AT1G04190 Orysa4|Os12g41190.1

AT2G17350 Orysa4|Os08g40100.1  
AT5G43220  
AT3G01810,AT5G43230 Orysa4|Os12g13340.1  
AT3G57780,AT2G42320,AT5G06930 Orysa4|Os09g31230.1,Orysa4|Os08g39490.1  
AT3G48960,AT3G49010,AT5G23900 Orysa4|Os03g37970.1,Orysa4|Os06g02510.1  
AT1G17860,AT1G73330,AT1G73325,AT1G72290,AT1G73260 Orysa4|Os04g44470.1  
AT5G03080 Orysa4|Os03g17940.1  
AT3G16565 Orysa4|Os01g03030.1  
AT5G19630 Orysa4|Os02g48590.1  
AT5G20430,AT5G20440 Orysa4|Os03g29570.1,Orysa4|Os10g25674.1  
AT5G45550  
AT4G19050 Orysa4|Os08g06610.1,Orysa4|Os03g38020.1  
AT5G22120 Orysa4|Os01g73470.1  
AT5G63910 Orysa4|Os04g59630.1  
Orysa4|Os10g41160.1  
AT1G49290,AT5G13620 Orysa4|Os07g17300.1  
AT3G07760 Orysa4|Os12g32992.1  
AT5G61530 Orysa4|Os07g30300.1  
AT1G22730 Orysa4|Os03g12180.1  
AT5G63190,AT3G48390,AT4G24800 Orysa4|Os08g02690.1  
Orysa4|Os11g32090.1  
AT3G12070,AT5G12210 Orysa4|Os08g40140.1  
Orysa4|Os03g11890.1  
AT3G63500  
AT1G14740 Orysa4|Os03g13590.1  
AT5G48160,AT3G07780 Orysa4|Os12g32980.1  
AT5G42670,AT5G52070 Orysa4|Os05g04860.1  
AT3G57560 Orysa4|Os04g46460.1,Orysa4|Os02g44000.1  
Orysa4|Os08g37290.1,Orysa4|Os09g28900.1  
Orysa4|Os01g11910.1  
AT2G40200  
AT1G68810,AT3G25710,AT3G56770,AT2G41130  
Orysa4|Os09g24490.1,Orysa4|Os08g33590.1,Orysa4|Os03g15440.1  
Orysa4|Os01g06640.1,Orysa4|Os05g07120.1  
AT2G26500 Orysa4|Os03g55720.1  
AT1G14150 Orysa4|Os02g36850.1  
AT4G12280,AT4G12290  
AT4G14940,AT1G31690,AT1G31710 Orysa4|Os06g23140.1,Orysa4|Os06g23114.1  
Orysa4|Os04g39120.1  
AT1G31680,AT1G31670  
AT4G12270  
Orysa4|Os04g20164.1  
AT2G35612  
Orysa4|Os12g27110.1  
AT1G62810,AT3G43670  
AT1G08390 Orysa4|Os03g47990.1  
Orysa4|Os10g34700.1  
AT1G11230,AT1G11220,AT1G61260,AT1G11210  
Orysa4|Os07g37620.1  
AT5G54300  
AT4G04990  
AT3G52640 Orysa4|Os02g50360.1  
AT5G47680 Orysa4|Os02g49360.1  
AT2G28000 Orysa4|Os03g64210.1  
AT1G26230  
AT5G18820 Orysa4|Os09g38980.1  
AT5G56500,AT3G13470,AT1G55490 Orysa4|Os06g02380.1,Orysa4|Os02g01280.1  
AT3G13860 Orysa4|Os05g46290.1  
AT2G33210,AT3G23990  
Orysa4|Os10g32550.1,Orysa4|Os03g04970.1  
AT1G77620 Orysa4|Os03g15580.1  
AT3G63000,AT2G47970 Orysa4|Os01g27990.1  
AT5G18920 Orysa4|Os05g33514.1  
Orysa4|Os06g10520.1  
AT1G60440  
AT4G32180 Orysa4|Os09g36270.1  
AT2G28100  
Orysa4|Os09g34920.1  
AT5G67550  
AT2G25270  
AT2G12400 Orysa4|Os02g55590.1  
Orysa4|Os02g09080.1,Orysa4|Os04g55110.1  
AT1G80540  
AT1G71110 Orysa4|Os01g03110.1  
Orysa4|Os11g16310.1  
AT5G59460 Orysa4|Os01g05130.1  
Orysa4|Os08g31710.1,Orysa4|Os09g20520.1  
AT2G18590  
Orysa4|Os08g31700.1  
AT4G36790 Orysa4|Os03g59450.1,Orysa4|Os07g10820.1  
AT1G78130,AT5G10190  
Orysa4|Os08g31670.1,Orysa4|Os09g20480.1,Orysa4|Os09g20500.1,Orysa4|Os09g20490.1,Orysa4|Os09

g20510.1  
AT5G27680 Orysa4|Os05g05810.1  
AT2G43560 Orysa4|Os08g42850.1  
AT1G45207,AT4G36970 Orysa4|Os09g28300.1,Orysa4|Os08g36760.1,Orysa4|Os02g52810.1  
AT1G80130,AT4G32340,AT5G20190  
AT4G17940 Orysa4|Os10g42610.1  
Orysa4|Os03g04710.1,Orysa4|Os04g43160.1  
Orysa4|Os04g41930.1,Orysa4|Os06g40440.1  
AT1G22800 Orysa4|Os12g10200.1  
AT5G16710 Orysa4|Os06g12630.1  
AT5G36270,AT1G75270,AT1G19550,AT1G19570  
Orysa4|Os02g39280.1  
AT3G59660 Orysa4|Os09g34130.1  
AT3G25860 Orysa4|Os08g33440.1,Orysa4|Os09g24320.1  
AT1G34430 Orysa4|Os12g08170.1  
AT3G02420 Orysa4|Os01g42010.1,Orysa4|Os05g51140.1  
Orysa4|Os01g45439.1  
AT1G12550,AT5G28310,AT2G45630 Orysa4|Os04g01674.1  
Orysa4|Os04g01650.1,Orysa4|Os04g01600.1,Orysa4|Os07g40660.1,Orysa4|Os08g34570.1,Orysa4|Os04  
g01660.1  
AT1G79870 Orysa4|Os01g12830.1  
AT2G16910 Orysa4|Os07g36460.1,Orysa4|Os02g02820.1  
Orysa4|Os11g32100.1  
AT5G10570,AT5G65640 Orysa4|Os10g39750.1,Orysa4|Os03g04310.1  
AT1G12860,AT3G26744 Orysa4|Os01g70310.1  
AT5G27200,AT3G05020,AT1G54630,AT1G54580  
Orysa4|Os09g36860.1,Orysa4|Os08g43580.1,Orysa4|Os03g63930.1  
AT4G25050 Orysa4|Os11g31900.1  
AT4G05010,AT4G21510,AT1G61340 Orysa4|Os07g37400.1  
Orysa4|Os06g08900.1,Orysa4|Os06g09120.1,Orysa4|Os06g09130.1,Orysa4|Os06g08890.1  
AT5G48410,AT5G48400,AT3G07520,AT3G04110 Orysa4|Os09g26144.1,Orysa4|Os02g54640.1  
Orysa4|Os09g31160.1  
Orysa4|Os05g40690.1  
Orysa4|Os06g08880.1  
Orysa4|Os09g26160.1  
AT2G32400  
AT1G05200,AT2G32390 Orysa4|Os06g46670.1,Orysa4|Os07g01310.1  
Orysa4|Os06g09050.1  
Orysa4|Os09g25940.1,Orysa4|Os06g09090.1  
Orysa4|Os06g08910.1  
Orysa4|Os06g13730.1  
Orysa4|Os07g33790.1,Orysa4|Os09g25930.1  
Orysa4|Os06g06130.1  
AT2G29100,AT2G29110,AT2G29120,AT2G24710,AT2G24720,AT4G31710,AT5G27100,AT5G11180,AT5G11210  
Orysa4|Os09g26000.1,Orysa4|Os09g25960.1,Orysa4|Os09g25990.1,Orysa4|Os09g25980.1  
AT2G17260,AT4G35290,AT1G42540,AT3G51480 Orysa4|Os02g02540.1,Orysa4|Os04g49570.1  
AT1G05805,AT2G43140 Orysa4|Os01g67480.1  
AT2G42280 Orysa4|Os09g31300.1  
Orysa4|Os04g41229.1,Orysa4|Os02g39140.1  
AT5G24740 Orysa4|Os08g02350.1  
AT4G27310,AT5G54470 Orysa4|Os01g11020.1,Orysa4|Os08g08120.1  
AT3G21890,AT4G15248  
Orysa4|Os03g13360.1  
AT1G78770 Orysa4|Os03g13370.1  
AT2G36480,AT2G36485 Orysa4|Os09g39270.1  
Orysa4|Os04g49610.1  
AT5G41960  
AT5G67220 Orysa4|Os06g49870.1  
AT1G67340,AT5G50450  
Orysa4|Os02g30300.1,Orysa4|Os04g31610.1,Orysa4|Os11g29710.1,Orysa4|Os01g69270.1  
AT2G45710,AT3G61110,AT5G47930 Orysa4|Os04g27860.1  
AT4G35905 Orysa4|Os10g30300.1  
AT1G51100Orysa4|Os01g48500.1  
AT1G15320  
Orysa4|Os01g06560.1  
AT4G18650,AT1G55710,AT4G18690,AT5G45830,AT4G18660,AT4G18680  
AT3G14880 Orysa4|Os05g48650.1  
AT5G22090 Orysa4|Os03g49830.1,Orysa4|Os03g15530.1,Orysa4|Os05g32420.1  
AT2G20980 Orysa4|Os09g36820.1  
AT5G61760,AT5G07370 Orysa4|Os06g42460.1,Orysa4|Os02g32370.1  
AT2G40316 Orysa4|Os03g18540.1  
AT1G11860Orysa4|Os04g53230.1  
AT5G35430 Orysa4|Os09g03600.1  
AT1G61280 Orysa4|Os12g02680.1,Orysa4|Os10g41950.1,Orysa4|Os03g43900.1  
AT2G39770  
AT4G30570  
AT3G55590  
Orysa4|Os08g13930.1,Orysa4|Os01g62840.1,Orysa4|Os03g16150.1  
AT1G73600,AT1G48600,AT3G18000 Orysa4|Os05g47540.1  
AT5G26940 Orysa4|Os04g53200.1,Orysa4|Os03g18940.1

Orysa4|Os01g46860.1  
Orysa4|Os03g05610.1,Orysa4|Os10g30790.1,Orysa4|Os03g05620.1,Orysa4|Os10g30770.1,Orysa4|Os03g05640.1,Orysa4|Os04g10690.1,Orysa4|Os04g10750.1,Orysa4|Os03g04360.1,Orysa4|Os08g45000.1  
AT2G32830,AT5G43370,AT5G43350,AT5G43360  
Orysa4|Os04g10800.1  
Orysa4|Os06g21920.1  
AT5G43340  
AT2G38940,AT3G54700  
Orysa4|Os06g21930.1  
Orysa4|Os10g20500.1  
AT1G20860,AT1G76430 Orysa4|Os06g21950.1  
AT4G08895  
AT4G08878 Orysa4|Os02g39750.1  
AT4G02350 Orysa4|Os06g33170.1,Orysa4|Os01g24950.1  
AT3G56640 Orysa4|Os10g27990.1,Orysa4|Os03g06760.1  
AT2G31940 Orysa4|Os09g27330.1  
AT5G19875 Orysa4|Os02g53510.1,Orysa4|Os06g10510.1  
AT1G27460 Orysa4|Os03g10350.1  
AT4G28600  
Orysa4|Os03g04500.1,Orysa4|Os10g33290.1  
AT2G43040 Orysa4|Os11g46230.1,Orysa4|Os12g37780.1  
AT5G66030  
Orysa4|Os12g34500.1,Orysa4|Os11g42490.1  
AT5G08290 Orysa4|Os10g34520.1  
Orysa4|Os05g47640.1  
AT4G29840,AT1G72810  
AT5G64290  
AT5G64280  
Orysa4|Os08g37600.1,Orysa4|Os09g29430.1  
Orysa4|Os12g33080.1  
AT5G12860  
AT1G47560  
AT1G47550  
Orysa4|Os03g42750.1,Orysa4|Os11g17600.1  
AT4G19490 Orysa4|Os04g13470.1  
AT4G22840,AT4G12030  
Orysa4|Os09g34900.1  
AT3G25410 Orysa4|Os02g27490.1  
AT2G17975 Orysa4|Os04g02000.1  
AT3G16380  
AT4G09040 Orysa4|Os08g37700.1  
AT1G01080 Orysa4|Os08g02390.1  
AT5G50250,AT4G24770 Orysa4|Os09g39180.1,Orysa4|Os08g44290.1  
AT2G36660 Orysa4|Os03g17030.1  
AT2G18510  
AT1G71770,AT1G22760  
Orysa4|Os05g13650.1,Orysa4|Os05g13630.1,Orysa4|Os05g13620.1  
AT2G35410 Orysa4|Os04g50110.1  
Orysa4|Os10g31900.1  
AT3G52380 Orysa4|Os07g06450.1  
AT5G03580  
Orysa4|Os08g22354.1,Orysa4|Os09g02700.1  
AT4G34110,AT1G49760,AT2G15500  
AT3G52150  
Orysa4|Os04g42600.1  
AT3G19350 Orysa4|Os09g18560.1  
AT3G46020  
AT1G34140  
Orysa4|Os06g38980.1  
AT1G60000  
Orysa4|Os02g57010.1  
Orysa4|Os04g58590.1  
AT2G37220,AT3G53460 Orysa4|Os07g43810.1,Orysa4|Os03g25960.1  
AT2G23350  
AT5G19030  
AT1G66810 Orysa4|Os08g38370.1,Orysa4|Os03g18950.1  
AT1G68200 Orysa4|Os05g50080.1,Orysa4|Os01g45730.1  
AT4G16566  
Orysa4|Os04g45280.1  
AT5G55490 Orysa4|Os07g47194.1,Orysa4|Os09g27040.1  
Orysa4|Os02g24380.1  
Orysa4|Os11g14180.1  
AT2G44090,AT3G59910 Orysa4|Os02g35480.1  
AT3G56500 Orysa4|Os03g20600.1  
AT3G15353 Orysa4|Os05g11320.1  
AT5G20990 Orysa4|Os04g56620.1  
AT4G31780  
Orysa4|Os09g25580.1  
Orysa4|Os08g20420.1  
AT2G11810  
AT5G20410 Orysa4|Os02g55910.1  
AT2G40190 Orysa4|Os12g39340.1

AT4G01660  
Orysa4|Os01g21610.1  
AT1G47840  
AT1G50460,AT3G20040 Orysa4|Os01g71320.1,Orysa4|Os05g31110.1  
AT4G37840  
Orysa4|Os01g09460.1,Orysa4|Os05g09500.1,Orysa4|Os07g26540.1  
AT2G19860,AT4G29130  
Orysa4|Os01g52450.1,Orysa4|Os05g45590.1,Orysa4|Os01g53930.1,Orysa4|Os05g44760.1  
AT5G42750 Orysa4|Os08g36970.1,Orysa4|Os09g28550.1  
AT1G30380 Orysa4|Os07g05480.1  
AT1G19715 Orysa4|Os05g43240.1  
AT1G73040  
Orysa4|Os01g51050.1  
Orysa4|Os04g26320.1  
AT1G09040,AT1G09050,AT1G55050,AT2G47820 Orysa4|Os03g22560.1,Orysa4|Os07g38080.1  
AT4G03430  
Orysa4|Os01g15860.1,Orysa4|Os10g35550.1  
AT2G41620,AT3G57350 Orysa4|Os03g22690.1  
AT1G64720 Orysa4|Os02g03230.1,Orysa4|Os04g02910.1  
AT5G54170  
AT4G14500,AT3G23080 Orysa4|Os07g08760.1  
AT1G55960,AT3G13062 Orysa4|Os02g26860.1  
AT5G16020 Orysa4|Os01g42060.1  
AT5G27760,AT3G05550 Orysa4|Os02g37930.1,Orysa4|Os07g47670.1  
AT1G08845 Orysa4|Os10g41050.1  
Orysa4|Os06g30870.1  
AT3G22450 Orysa4|Os10g34320.1  
AT3G20230 Orysa4|Os02g46440.1  
AT2G37760  
Orysa4|Os05g38220.1,Orysa4|Os05g38230.1  
AT5G62420  
Orysa4|Os10g02390.1,Orysa4|Os10g02380.1,Orysa4|Os03g13390.1,Orysa4|Os10g02470.1,Orysa4|Os10  
g02480.1,Orysa4|Os10g02490.1  
AT2G21250,AT2G21260  
AT1G59950,AT1G59960 Orysa4|Os04g37480.1,Orysa4|Os04g37490.1  
AT5G01670 Orysa4|Os05g39690.1  
AT2G37790,AT2G37770,AT3G53880 Orysa4|Os01g62860.1,Orysa4|Os01g62870.1,Orysa4|Os01g62880.1  
Orysa4|Os04g08550.1  
AT2G17705 Orysa4|Os03g04370.1  
AT4G13400 Orysa4|Os05g48230.1  
AT1G03350 Orysa4|Os01g16670.1,Orysa4|Os07g45310.1  
AT4G13110  
AT2G29650  
AT2G38060 Orysa4|Os05g37820.1  
AT3G46980 Orysa4|Os01g63290.1  
AT5G20380  
AT5G44370 Orysa4|Os12g07970.1,Orysa4|Os11g08370.1  
AT4G00370 Orysa4|Os09g39680.1  
Orysa4|Os01g17240.1  
AT5G08415 Orysa4|Os05g43576.1,Orysa4|Os01g56310.1  
AT2G20860 Orysa4|Os04g38330.1  
AT1G54920 Orysa4|Os12g05100.1  
AT5G12460  
AT1G05280  
AT1G07850  
AT1G33250 Orysa4|Os10g37260.1  
AT2G37730,AT3G11420 Orysa4|Os02g31210.1,Orysa4|Os03g16290.1,Orysa4|Os03g16334.1  
Orysa4|Os03g03270.1,Orysa4|Os10g39020.1,Orysa4|Os02g45700.1,Orysa4|Os04g48950.1  
AT4G15240 Orysa4|Os08g04300.1  
AT1G01570,AT4G00300,AT4G11350,AT4G23490,AT5G41460  
Orysa4|Os11g02650.1,Orysa4|Os06g19820.1  
AT4G28200 Orysa4|Os02g01350.1  
Orysa4|Os02g33330.1,Orysa4|Os04g33860.1  
AT3G11600,AT5G06270 Orysa4|Os05g37030.1  
AT5G22270 Orysa4|Os04g58790.1  
Orysa4|Os12g06130.1  
AT1G73430 Orysa4|Os08g34970.1  
AT3G55340 Orysa4|Os05g02400.1  
Orysa4|Os03g03140.1  
AT1G21790 Orysa4|Os01g64930.1  
AT2G03780 Orysa4|Os01g16100.1  
AT1G13245  
AT2G36985,AT3G53232 Orysa4|Os05g01960.1,Orysa4|Os05g38380.1  
AT2G39705,AT2G29125,AT1G07490,AT5G59510  
Orysa4|Os05g08620.1  
AT1G67700 Orysa4|Os02g38820.1  
AT2G01590 Orysa4|Os09g13600.1  
AT1G80570  
Orysa4|Os02g55540.1,Orysa4|Os04g30320.1,Orysa4|Os04g30180.1,Orysa4|Os04g30200.1,Orysa4|Os04  
g30210.1,Orysa4|Os04g30230.1,Orysa4|Os12g33210.1,Orysa4|Os12g34220.1,Orysa4|Os12g33220.1,Orysa4|Os12g  
33230.1,Orysa4|Os02g55550.1  
AT4G28070,AT4G30490 Orysa4|Os08g16480.1

AT5G21070 Orysa4|Os01g17020.1  
AT1G79730 Orysa4|Os08g06070.1  
AT4G08990,AT4G14140,AT4G13610,AT5G49160  
Orysa4|Os07g08500.1  
Orysa4|Os03g58400.1  
AT1G49005,AT1G73965,AT1G68795 Orysa4|Os02g21890.1  
AT3G31960  
AT4G27040 Orysa4|Os09g36020.1  
AT5G04520 Orysa4|Os03g24830.1  
AT5G10080 Orysa4|Os02g51540.1  
AT4G35880  
AT3G51340,AT3G51350,AT3G51330,AT3G51360,AT2G17760 Orysa4|Os06g50390.1,Orysa4|Os04g15790.1  
AT4G27630,AT1G64990 Orysa4|Os04g51180.1  
AT4G30790 Orysa4|Os02g08350.1  
AT5G44000  
Orysa4|Os02g56970.1  
AT4G19880,AT5G45020,AT5G44990 Orysa4|Os02g21460.1  
AT1G62040  
AT4G04620,AT4G21980  
AT4G16520,AT2G45170,AT3G60640  
AT3G15580,AT3G06420 Orysa4|Os11g01010.1  
AT2G05630  
Orysa4|Os04g53240.1,Orysa4|Os08g09240.1  
AT3G18520 Orysa4|Os07g06980.1  
AT5G61070  
AT5G61050,AT5G61060  
AT1G01920 Orysa4|Os06g03676.1  
AT1G49930  
AT1G50200  
AT5G22800 Orysa4|Os06g13660.1  
Orysa4|Os10g10244.1  
AT3G04500  
Orysa4|Os02g40900.1  
Orysa4|Os08g45240.1  
AT3G23060 Orysa4|Os03g58390.1  
AT1G06770,AT2G30580 Orysa4|Os12g40790.1,Orysa4|Os03g43360.1  
Orysa4|Os01g09290.1  
AT4G24120  
Orysa4|Os02g43410.1  
Orysa4|Os04g44320.1,Orysa4|Os02g42220.1,Orysa4|Os04g44300.1,Orysa4|Os04g44330.1  
Orysa4|Os08g17830.1,Orysa4|Os02g02450.1,Orysa4|Os01g61390.1,Orysa4|Os05g16280.1,Orysa4|Os05  
g16290.1,Orysa4|Os01g13710.1,Orysa4|Os02g02460.1  
Orysa4|Os03g56640.1  
AT5G41000,AT3G27020 Orysa4|Os04g32050.1  
Orysa4|Os04g32060.1  
Orysa4|Os04g57840.1  
AT5G45450,AT3G17650,AT1G48370,AT1G65730  
AT5G53550,AT5G24380 Orysa4|Os04g45900.1,Orysa4|Os02g43370.1,Orysa4|Os04g45860.1  
AT1G67500  
Orysa4|Os07g10860.1  
Orysa4|Os07g47280.1  
AT5G27980  
AT3G22500,AT3G22490  
Orysa4|Os06g23350.1  
Orysa4|Os12g28520.1,Orysa4|Os03g06360.1,Orysa4|Os03g53610.1  
AT1G03120 Orysa4|Os10g29570.1  
AT5G53270,AT5G53260  
Orysa4|Os12g23900.1,Orysa4|Os12g43140.1,Orysa4|Os03g53620.1  
AT3G60780,AT2G45360,AT1G62840,AT1G12320 Orysa4|Os02g25780.1  
AT5G62280  
Orysa4|Os08g01910.1  
AT2G05320 Orysa4|Os08g36690.1,Orysa4|Os02g55470.1  
AT3G24880,AT3G24870 Orysa4|Os08g08000.1,Orysa4|Os05g51550.1  
AT1G61690 Orysa4|Os03g46710.1  
AT3G01980 Orysa4|Os03g63290.1  
Orysa4|Os01g73550.1  
Orysa4|Os01g09560.1  
AT3G16480,AT1G51980 Orysa4|Os05g44916.1,Orysa4|Os01g53700.1  
Orysa4|Os10g28060.1,Orysa4|Os03g06700.1  
Orysa4|Os09g19650.1  
AT1G19440 Orysa4|Os05g49290.1  
Orysa4|Os01g34560.1,Orysa4|Os04g02640.1,Orysa4|Os06g15020.1,Orysa4|Os06g15170.1,Orysa4|Os06  
g14810.1,Orysa4|Os02g49920.1,Orysa4|Os06g15250.1  
Orysa4|Os03g26530.1,Orysa4|Os02g56860.1,Orysa4|Os03g26620.1,Orysa4|Os10g33370.1  
Orysa4|Os07g15190.1  
AT1G71160,AT5G49070  
Orysa4|Os11g37900.1  
AT3G10280,AT2G46720  
AT2G15090,AT4G34250,AT4G34520  
Orysa4|Os02g11070.1  
AT4G34510,AT2G16280  
AT2G26640 Orysa4|Os05g49900.1



AT3G52160  
Orysa4|Os09g34930.1  
Orysa4|Os01g21620.1  
AT1G07720,AT2G28630  
AT1G25450,AT1G68530 Orysa4|Os03g12030.1  
AT1G01120Orysa4|Os10g07010.1,Orysa4|Os03g14170.1  
AT5G04530  
Orysa4|Os03g13630.1  
Orysa4|Os03g42334.1  
AT5G43760,AT1G04220  
AT2G26250 Orysa4|Os03g08360.1  
AT5G03160 Orysa4|Os02g10180.1,Orysa4|Os01g74580.1  
AT4G20310 Orysa4|Os01g46590.1  
AT1G32190 Orysa4|Os08g06420.1  
AT5G38220,AT1G66900 Orysa4|Os01g49510.1  
Orysa4|Os02g09770.1,Orysa4|Os06g42730.1,Orysa4|Os08g38092.1  
AT1G13610,AT3G30380  
Orysa4|Os02g31200.1  
AT3G01690,AT5G14390,AT4G24760 Orysa4|Os12g18860.1  
AT2G24320,AT4G31020  
AT4G02715 Orysa4|Os03g06420.1  
AT3G50685 Orysa4|Os10g15300.1  
Orysa4|Os01g67310.1  
Orysa4|Os12g36610.1,Orysa4|Os12g36530.1,Orysa4|Os03g27610.1,Orysa4|Os11g40009.1,Orysa4|Os11g39990.1,Orysa4|Os08g37180.1,Orysa4|Os08g37210.1,Orysa4|Os08g28880.1,Orysa4|Os08g37250.1  
AT4G37070,AT4G37060,AT5G43590,AT4G37050  
AT2G26560 Orysa4|Os09g28770.1  
AT5G19610  
AT1G13980 Orysa4|Os03g46330.1  
Orysa4|Os02g22090.1  
Orysa4|Os02g36040.1,Orysa4|Os03g49790.1  
AT5G39500  
Orysa4|Os04g02690.1  
Orysa4|Os07g18874.1  
AT2G28070 Orysa4|Os03g64200.1  
AT1G51500,AT3G21090,AT1G51460 Orysa4|Os05g13520.1  
Orysa4|Os09g07670.1,Orysa4|Os09g03939.1,Orysa4|Os10g08014.1,Orysa4|Os12g22110.1,Orysa4|Os12g22284.1  
Orysa4|Os09g07700.1  
Orysa4|Os09g29670.1,Orysa4|Os09g29660.1  
AT1G17840 Orysa4|Os04g44610.1,Orysa4|Os10g35180.1  
AT3G21080 Orysa4|Os10g08010.1  
Orysa4|Os12g22120.1  
AT5G11780Orysa4|Os01g41640.1  
AT5G01770,AT3G08850 Orysa4|Os12g01922.1  
AT5G19430,AT5G12310 Orysa4|Os01g72480.1  
Orysa4|Os02g01960.1  
AT2G31240 Orysa4|Os02g57470.1  
AT3G27960,AT1G27500 Orysa4|Os02g47880.1  
Orysa4|Os03g05540.1  
AT4G10840  
Orysa4|Os06g33810.1  
AT4G23860  
AT5G46600,AT5G46610,AT4G17970 Orysa4|Os10g42180.1  
AT4G00910 Orysa4|Os06g22600.1,Orysa4|Os04g47930.1  
Orysa4|Os01g53570.1  
AT4G17585  
Orysa4|Os02g45150.1  
AT1G08430,AT1G08440,AT2G27240,AT3G11680 Orysa4|Os04g34010.1  
AT3G25545 Orysa4|Os01g11970.1  
AT5G15930,AT3G02460 Orysa4|Os08g31840.1  
AT3G20070 Orysa4|Os06g13640.1,Orysa4|Os01g04600.1  
Orysa4|Os01g09320.1  
AT4G00570 Orysa4|Os10g35960.1  
AT2G13560 Orysa4|Os07g31380.1  
AT5G11670,AT5G25880  
Orysa4|Os02g44550.1  
AT2G19900  
Orysa4|Os01g54030.1  
AT1G79750  
Orysa4|Os01g52500.1  
AT1G51450 Orysa4|Os11g04890.1,Orysa4|Os12g04930.1,Orysa4|Os11g04930.1  
AT1G34210,AT1G71830 Orysa4|Os04g38480.1  
Orysa4|Os01g48390.1  
AT3G17640  
AT3G43740,AT5G21090 Orysa4|Os01g17250.1,Orysa4|Os01g59440.1  
Orysa4|Os04g14570.1  
Orysa4|Os11g07130.1  
AT1G28440 Orysa4|Os01g13800.1  
Orysa4|Os04g03210.1,Orysa4|Os06g23190.1  
Orysa4|Os03g45430.1  
Orysa4|Os01g49910.1

AT4G03390,AT2G20850 Orysa4|Os06g45020.1,Orysa4|Os02g07960.1,Orysa4|Os07g37810.1  
AT1G34420 Orysa4|Os11g09130.1,Orysa4|Os12g08180.1  
Orysa4|Os09g17880.1,Orysa4|Os08g28890.1  
Orysa4|Os01g16230.1  
AT5G66330 Orysa4|Os02g43250.1  
AT5G49660  
Orysa4|Os09g19500.1  
Orysa4|Os02g40190.1  
AT3G15410 Orysa4|Os02g58030.1  
Orysa4|Os07g02450.1,Orysa4|Os11g35410.1,Orysa4|Os02g17400.1,Orysa4|Os01g41780.1,Orysa4|Os01  
g41750.1,Orysa4|Os10g22930.1,Orysa4|Os11g10720.1  
Orysa4|Os05g16420.1,Orysa4|Os05g07850.1  
AT5G58150  
AT5G13290 Orysa4|Os09g19360.1,Orysa4|Os01g70260.1  
Orysa4|Os11g39370.1  
Orysa4|Os11g36090.1,Orysa4|Os11g36190.1,Orysa4|Os11g36150.1,Orysa4|Os11g36160.1,Orysa4|Os11  
g35500.1,Orysa4|Os11g36180.1,Orysa4|Os02g42370.1  
Orysa4|Os02g05950.1,Orysa4|Os02g05970.1,Orysa4|Os02g05980.1,Orysa4|Os02g05940.1,Orysa4|Os02  
g05910.1,Orysa4|Os02g05920.1,Orysa4|Os02g05960.1,Orysa4|Os06g47760.1,Orysa4|Os06g47650.1,Orysa4|Os02g  
06190.1,Orysa4|Os02g06030.1,Orysa4|Os02g06070.1,Orysa4|Os02g06180.1,Orysa4|Os02g06200.1,Orysa4|Os02g0  
6210.1,Orysa4|Os02g06270.1,Orysa4|Os02g06260.1,Orysa4|Os02g06130.1  
Orysa4|Os02g06220.1  
AT4G33430,AT2G13800,AT2G13790  
AT1G27190,AT1G69990,AT3G28450 Orysa4|Os04g41030.1  
Orysa4|Os04g55440.1  
Orysa4|Os10g18990.1,Orysa4|Os10g19160.1,Orysa4|Os08g14940.1,Orysa4|Os08g14950.1,Orysa4|Os08  
g14960.1  
Orysa4|Os11g36200.1  
AT5G05160  
Orysa4|Os11g06540.1  
Orysa4|Os04g58910.1  
Orysa4|Os11g47160.1,Orysa4|Os11g46960.1,Orysa4|Os11g46980.1,Orysa4|Os10g13970.1,Orysa4|Os06  
g16070.1,Orysa4|Os11g46970.1,Orysa4|Os11g47180.1,Orysa4|Os11g47000.1,Orysa4|Os11g47210.1,Orysa4|Os11g  
0310.1,Orysa4|Os01g12790.1,Orysa4|Os07g03990.1,Orysa4|Os11g47290.1,Orysa4|Os11g47310.1,Orysa4|Os11g472  
40.1,Orysa4|Os02g30540.1  
Orysa4|Os09g18620.1  
Orysa4|Os03g01410.1  
Orysa4|Os05g51740.1  
AT5G06940  
AT1G75820  
AT3G56370,AT5G01890 Orysa4|Os05g40050.1,Orysa4|Os03g21730.1  
AT2G26380,AT1G33590,AT1G33610,AT1G33600,AT1G33670  
AT5G45800 Orysa4|Os02g14480.1,Orysa4|Os06g35200.1  
AT1G13910  
Orysa4|Os03g32580.1  
AT1G73070,AT1G73080,AT1G17750 Orysa4|Os08g34640.1,Orysa4|Os08g34650.1  
AT1G66150,AT2G01820 Orysa4|Os03g50810.1  
Orysa4|Os09g18550.1  
AT3G24240,AT5G48940 Orysa4|Os04g04330.1  
AT1G78530,AT5G41680  
AT4G20270 Orysa4|Os11g12620.1  
AT1G74360 Orysa4|Os10g03420.1,Orysa4|Os07g40630.1  
Orysa4|Os09g25540.1  
Orysa4|Os01g66810.1  
Orysa4|Os03g44260.1,Orysa4|Os01g06750.1  
Orysa4|Os10g22920.1  
Orysa4|Os02g06280.1  
Orysa4|Os02g26310.1  
Orysa4|Os01g43190.1  
Orysa4|Os01g14510.1  
Orysa4|Os06g47710.1  
Orysa4|Os11g14050.1,Orysa4|Os12g10740.1  
AT3G23750  
AT3G11010,AT5G27060,AT3G28890,AT3G11080,AT3G05650,AT3G05660,AT2G15080,AT1G47890,AT1G45616,AT4  
G13880,AT4G13920,AT4G13810,AT4G13820,AT1G71400,AT1G71390,AT3G05360,AT3G05370,AT3G23120,AT3G23  
110,AT3G23010,AT3G24982,AT3G25020,AT3G25010,AT3G24900,AT2G33020,AT2G32680,AT2G25440,AT2G33060,  
AT2G33050,AT2G33080,AT2G32660,AT5G40170  
AT5G59616 Orysa4|Os02g53720.1  
AT3G28040 Orysa4|Os01g72700.1  
AT3G57830,AT2G42290 Orysa4|Os08g39590.1  
AT5G46080 Orysa4|Os09g18000.1  
Orysa4|Os10g23030.1  
Orysa4|Os05g45010.1  
Orysa4|Os10g05570.1  
Orysa4|Os01g33110.1  
Orysa4|Os05g17800.1  
AT1G63430,AT5G41180  
Orysa4|Os10g33140.1  
AT2G02220 Orysa4|Os02g41890.1  
AT4G23740 Orysa4|Os01g12390.1  
AT2G27060 Orysa4|Os03g20450.1  
AT1G06840 Orysa4|Os01g72990.1

Orysa4|Os05g40770.1,Orysa4|Os01g60060.1  
AT5G65710 Orysa4|Os04g55420.1  
Orysa4|Os01g53920.1,Orysa4|Os05g44770.1  
AT3G50230,AT5G67200,AT5G43020 Orysa4|Os04g55620.1  
Orysa4|Os02g02490.1  
Orysa4|Os11g35640.1  
Orysa4|Os07g42626.1,Orysa4|Os03g27990.1  
Orysa4|Os09g23570.1,Orysa4|Os08g33090.1  
Orysa4|Os11g07190.1  
Orysa4|Os04g13640.1,Orysa4|Os02g06150.1  
Orysa4|Os05g09640.1  
Orysa4|Os06g12120.1  
AT4G08850,AT1G35710 Orysa4|Os02g34790.1  
Orysa4|Os02g10100.1  
Orysa4|Os06g08154.1  
AT1G53730,AT3G14350 Orysa4|Os10g25090.1  
AT1G69910 Orysa4|Os08g38630.1  
Orysa4|Os07g28300.1,Orysa4|Os01g41770.1,Orysa4|Os01g41930.1,Orysa4|Os11g35660.1,Orysa4|Os11g35450.1,Orysa4|Os11g35850.1,Orysa4|Os11g35490.1,Orysa4|Os11g36120.1,Orysa4|Os11g35840.1,Orysa4|Os11g36020.1,Orysa4|Os11g36000.1,Orysa4|Os11g35890.1  
AT5G62710 Orysa4|Os12g44090.1  
AT4G18760,AT5G45770  
AT5G48740 Orysa4|Os02g13410.1  
AT3G12610,AT3G20820,AT5G12940 Orysa4|Os08g39550.1  
Orysa4|Os05g16920.1  
Orysa4|Os11g35980.1  
Orysa4|Os10g33080.1,Orysa4|Os10g38450.1,Orysa4|Os10g33110.1,Orysa4|Os10g33060.1,Orysa4|Os10g33040.1,Orysa4|Os02g06620.1,Orysa4|Os02g06600.1,Orysa4|Os08g16580.1  
AT5G37450  
AT2G14440,AT2G14510,AT1G07550,AT3G46420,AT3G46340,AT3G46400,AT3G46370,AT3G46350,AT5G59650,AT5G59680,AT5G59660,AT5G59670,AT3G46330,AT5G16900,AT1G07560,AT1G51850,AT1G51820,AT1G51805,AT3G21340,AT2G04300,AT1G51810,AT1G49100,AT2G28990,AT2G28970,AT2G28960,AT2G29000,AT4G20450,AT1G51870,AT1G51860,AT1G51880,AT1G51890,AT1G51910,AT1G51800,AT2G19230,AT2G19210,AT2G19190,AT4G29990,AT1G05700,AT4G29450,AT4G29180,AT1G51790  
Orysa4|Os01g66820.1  
AT2G37050 Orysa4|Os12g01200.1,Orysa4|Os11g01200.1  
AT3G02880,AT5G16590  
AT2G25790,AT5G51350  
AT1G24650  
AT5G61480 Orysa4|Os08g05290.1  
Orysa4|Os03g18370.1  
Orysa4|Os11g19480.1  
Orysa4|Os04g38910.1  
AT5G07180,AT5G62230 Orysa4|Os06g03970.1  
AT5G65240,AT5G10290 Orysa4|Os02g18320.1,Orysa4|Os03g49620.1  
AT3G53590  
AT5G06820 Orysa4|Os02g10110.1  
Orysa4|Os01g59580.1,Orysa4|Os01g59570.1,Orysa4|Os01g59550.1  
Orysa4|Os09g22300.1  
Orysa4|Os04g39650.1  
AT5G07620  
Orysa4|Os04g03180.1  
Orysa4|Os03g13940.1  
Orysa4|Os09g19400.1  
Orysa4|Os11g12560.1,Orysa4|Os11g12530.1  
Orysa4|Os09g18510.1  
AT2G41820 Orysa4|Os07g10630.1  
AT4G20940 Orysa4|Os07g05190.1  
Orysa4|Os05g24010.1  
Orysa4|Os11g35810.1  
AT5G23400 Orysa4|Os04g58080.1  
AT5G20690,AT3G42880,AT1G72460  
Orysa4|Os05g45000.1  
Orysa4|Os08g39940.1,Orysa4|Os09g31450.1,Orysa4|Os07g38130.1  
Orysa4|Os11g31550.1,Orysa4|Os11g31560.1,Orysa4|Os11g31530.1,Orysa4|Os11g31540.1  
Orysa4|Os03g48880.1  
AT1G56130,AT1G56140,AT1G56120,AT1G56145  
Orysa4|Os04g52614.1,Orysa4|Os04g52600.1,Orysa4|Os04g52590.1,Orysa4|Os04g22470.1,Orysa4|Os05g17604.1,Orysa4|Os05g16930.1,Orysa4|Os05g16740.1,Orysa4|Os05g16824.1,Orysa4|Os08g10320.1,Orysa4|Os08g10310.1,Orysa4|Os08g10300.1,Orysa4|Os08g10290.1,Orysa4|Os08g10330.1  
Orysa4|Os12g06110.1,Orysa4|Os03g53090.1,Orysa4|Os06g45630.1  
AT3G20190,AT1G50610,AT5G35390,AT2G07040,AT4G31250  
Orysa4|Os02g07810.1,Orysa4|Os06g45240.1,Orysa4|Os08g40990.1  
Orysa4|Os09g39860.1  
Orysa4|Os03g32180.1  
AT3G17840,AT1G48480 Orysa4|Os03g12250.1,Orysa4|Os03g50450.1  
AT3G59510  
Orysa4|Os01g19160.1  
AT3G14840,AT1G53420  
Orysa4|Os01g04230.1  
AT1G67510

Orysa4|Os02g34800.1,Orysa4|Os02g34770.1  
AT1G09970,AT3G19700 Orysa4|Os12g43640.1  
AT5G25910,AT5G25930  
Orysa4|Os02g13460.1,Orysa4|Os02g13430.1,Orysa4|Os06g36310.1,Orysa4|Os06g36270.1,Orysa4|Os02  
g12910.1,Orysa4|Os02g12940.1  
Orysa4|Os02g17730.1  
AT1G29730,AT1G29740  
AT2G33170,AT5G63930 Orysa4|Os04g42700.1  
Orysa4|Os01g54630.1  
AT3G03770 Orysa4|Os03g57780.1,Orysa4|Os07g07230.1  
Orysa4|Os08g40650.1,Orysa4|Os05g15720.1  
AT4G39400 Orysa4|Os01g52050.1  
Orysa4|Os09g29540.1  
Orysa4|Os12g13300.1  
Orysa4|Os02g13420.1  
AT3G25560,AT5G16000,AT4G30520,AT2G23950  
AT5G46330 Orysa4|Os04g52780.1  
AT1G11130  
AT2G33030  
Orysa4|Os02g12420.1,Orysa4|Os02g12400.1,Orysa4|Os02g12450.1,Orysa4|Os06g38490.1,Orysa4|Os12  
g42520.1  
AT2G16250,AT4G39270 Orysa4|Os07g04220.1,Orysa4|Os03g56250.1,Orysa4|Os03g51440.1  
Orysa4|Os06g18000.1  
Orysa4|Os05g07820.1  
AT1G55610,AT3G13380 Orysa4|Os09g12240.1,Orysa4|Os08g25380.1  
AT1G12460,AT1G62950 Orysa4|Os10g38800.1  
AT5G06870,AT5G06860 Orysa4|Os05g01370.1,Orysa4|Os05g01380.1  
AT1G51830 Orysa4|Os09g18040.1  
Orysa4|Os10g05560.1  
Orysa4|Os02g16790.1,Orysa4|Os01g51400.1  
Orysa4|Os01g74550.1  
Orysa4|Os03g21510.1,Orysa4|Os07g48310.1  
AT4G04220  
AT5G45780 Orysa4|Os02g14120.1  
Orysa4|Os09g19229.1,Orysa4|Os09g19350.1,Orysa4|Os09g19140.1,Orysa4|Os09g18360.1,Orysa4|Os09  
g18030.1,Orysa4|Os09g18020.1,Orysa4|Os09g18260.1,Orysa4|Os09g18230.1,Orysa4|Os09g17910.1,Orysa4|Os09g  
18594.1  
Orysa4|Os09g15700.1,Orysa4|Os08g28870.1  
AT5G61570  
Orysa4|Os07g28570.1  
Orysa4|Os01g07560.1,Orysa4|Os05g07740.1  
AT1G34290 Orysa4|Os06g08680.1  
AT1G08590,AT4G28650 Orysa4|Os02g02140.1,Orysa4|Os03g05140.1  
AT1G67720  
AT5G10020 Orysa4|Os07g43350.1  
AT2G34930 Orysa4|Os06g04830.1,Orysa4|Os06g04840.1,Orysa4|Os08g42840.1,Orysa4|Os06g04810.1  
AT1G69270  
Orysa4|Os04g57660.1,Orysa4|Os04g57630.1  
Orysa4|Os02g06240.1  
AT5G07280  
AT2G42800 Orysa4|Os05g45430.1,Orysa4|Os01g52880.1  
Orysa4|Os02g12440.1  
AT2G26730 Orysa4|Os05g51070.1,Orysa4|Os01g42294.1  
AT1G68400  
Orysa4|Os02g40200.1,Orysa4|Os02g40180.1,Orysa4|Os07g03000.1,Orysa4|Os02g39660.1,Orysa4|Os02  
g39670.1,Orysa4|Os11g07160.1,Orysa4|Os11g07140.1,Orysa4|Os11g07120.1,Orysa4|Os11g07060.1,Orysa4|Os11g0  
7210.1,Orysa4|Os11g07260.1,Orysa4|Os11g07270.1,Orysa4|Os11g07240.1,Orysa4|Os11g07170.1,Orysa4|Os11g071  
10.1,Orysa4|Os07g14820.1,Orysa4|Os11g07250.1,Orysa4|Os11g07230.1  
AT1G68780,AT3G25670,AT1G13230 Orysa4|Os01g02060.1  
Orysa4|Os04g15530.1  
AT4G03010,AT1G03440 Orysa4|Os05g33690.1  
Orysa4|Os05g06240.1  
AT4G36180,AT1G75640 Orysa4|Os04g48760.1  
Orysa4|Os10g35040.1  
AT1G72300,AT1G17240,AT1G17250  
Orysa4|Os06g47700.1,Orysa4|Os06g47740.1,Orysa4|Os06g47750.1,Orysa4|Os06g47720.1  
AT5G49290,AT1G74180,AT2G25470,AT1G54480,AT1G74170,AT1G74190,AT1G74200,AT1G58190,AT3G53240,AT1  
G07390  
Orysa4|Os03g12730.1  
AT5G63710  
Orysa4|Os05g41230.1  
AT5G45840 Orysa4|Os11g06530.1  
AT3G49750,AT5G65830 Orysa4|Os09g04490.1  
Orysa4|Os05g18090.1  
Orysa4|Os03g28270.1  
AT1G66830  
AT2G26330 Orysa4|Os06g10230.1  
AT3G47580,AT3G47090,AT3G47570,AT3G47110,AT5G20480  
Orysa4|Os01g05940.1,Orysa4|Os01g05640.1,Orysa4|Os01g05960.1,Orysa4|Os01g05870.1,Orysa4|Os10  
g22860.1  
Orysa4|Os11g35960.1  
AT2G36570

Orysa4|Os06g07260.1  
Orysa4|Os01g06720.1,Orysa4|Os01g06520.1,Orysa4|Os01g06760.1,Orysa4|Os01g06920.1,Orysa4|Os01g06890.1,Orysa4|Os01g06670.1,Orysa4|Os04g28210.1,Orysa4|Os12g10870.1,Orysa4|Os12g10930.1,Orysa4|Os12g11370.1,Orysa4|Os12g11500.1,Orysa4|Os12g11930.1,Orysa4|Os12g11940.1,Orysa4|Os12g12130.1,Orysa4|Os12g11680.1,Orysa4|Os12g12010.1,Orysa4|Os12g11720.1,Orysa4|Os12g12120.1,Orysa4|Os12g11860.1,Orysa4|Os01g07280.1,Orysa4|Os01g04070.1,Orysa4|Os04g40440.1,Orysa4|Os01g06836.1,Orysa4|Os01g06820.1,Orysa4|Os01g06790.1  
AT1G53440,AT1G53430,AT1G29750  
Orysa4|Os02g01730.1  
AT1G80080  
Orysa4|Os11g33380.1  
AT5G58300,AT3G08680 Orysa4|Os05g40200.1,Orysa4|Os01g60330.1  
AT2G24130 Orysa4|Os06g08690.1,Orysa4|Os06g08710.1  
Orysa4|Os09g19160.1,Orysa4|Os08g10130.1  
Orysa4|Os05g40270.1,Orysa4|Os01g60280.1  
AT1G17230 Orysa4|Os07g05740.1  
AT1G60630 Orysa4|Os02g58390.1  
Orysa4|Os10g06760.1,Orysa4|Os10g06740.1  
AT2G01950 Orysa4|Os10g02500.1  
AT5G53890 Orysa4|Os07g01710.1  
AT1G47885  
AT4G26540,AT5G56040 Orysa4|Os09g30190.1,Orysa4|Os08g38560.1  
AT1G64210  
AT4G22130 Orysa4|Os06g42800.1,Orysa4|Os02g09740.1  
Orysa4|Os06g16300.1,Orysa4|Os02g49600.1  
Orysa4|Os06g07130.1  
AT4G18640  
Orysa4|Os02g17710.1  
AT1G72180 Orysa4|Os01g65650.1  
AT4G28560  
Orysa4|Os07g38640.1  
Orysa4|Os01g10900.1,Orysa4|Os09g04480.1  
AT5G14210,AT5G63410 Orysa4|Os11g20360.1  
Orysa4|Os09g19180.1  
Orysa4|Os02g40130.1  
Orysa4|Os10g02870.1  
Orysa4|Os10g24850.1  
Orysa4|Os05g44950.1  
Orysa4|Os04g46320.1,Orysa4|Os11g40840.1  
Orysa4|Os05g14030.1  
AT3G49670,AT5G65700 Orysa4|Os03g56270.1,Orysa4|Os07g04190.1  
AT2G35620,AT1G31420 Orysa4|Os03g16010.1  
AT1G79620 Orysa4|Os03g21230.1  
AT1G51840  
AT5G61240 Orysa4|Os03g11340.1  
Orysa4|Os06g07590.1  
Orysa4|Os05g44940.1,Orysa4|Os05g44930.1,Orysa4|Os05g44960.1,Orysa4|Os05g44970.1,Orysa4|Os01g03370.1,Orysa4|Os05g44990.1,Orysa4|Os02g05730.1  
AT2G23300,AT4G37250,AT5G67280,AT4G34220,AT2G15300  
Orysa4|Os09g31420.1  
AT1G60800 Orysa4|Os01g07630.1  
AT2G01210,AT1G25320 Orysa4|Os01g33090.1  
AT5G49780,AT5G49760,AT5G49770,AT5G49750  
AT2G02780,AT1G14390 Orysa4|Os06g38970.1  
AT5G58540  
AT2G15320  
AT3G24660 Orysa4|Os08g45060.1  
AT5G39390  
Orysa4|Os11g14420.1  
AT4G28490  
AT3G02130 Orysa4|Os03g54900.1,Orysa4|Os07g41140.1  
AT2G24230 Orysa4|Os08g17410.1  
AT5G44700,AT4G20140 Orysa4|Os07g31500.1  
AT3G56050  
AT1G78980,AT3G13065 Orysa4|Os09g38700.1  
AT5G48380  
AT3G51740,AT3G56100 Orysa4|Os12g01700.1,Orysa4|Os11g01620.1,Orysa4|Os03g18630.1  
AT2G31880  
Orysa4|Os03g51060.1,Orysa4|Os05g33160.1,Orysa4|Os05g38010.1,Orysa4|Os11g40550.1  
AT5G24100,AT5G53320  
AT5G01950  
AT1G34110,Orysa4|Os06g38990.1  
AT4G16162  
Orysa4|Os10g03050.1,Orysa4|Os10g02970.1  
Orysa4|Os02g43870.1  
AT1G07650 Orysa4|Os09g17630.1  
Orysa4|Os04g58700.1  
Orysa4|Os05g48660.1  
Orysa4|Os01g41910.1  
Orysa4|Os01g43440.1  
AT5G07150  
AT3G12145

Orysa4|Os01g49920.1  
Orysa4|Os03g30050.1  
AT4G29240,AT2G19780  
AT1G65380 Orysa4|Os02g39100.1  
Orysa4|Os11g40970.1,Orysa4|Os11g40890.1,Orysa4|Os02g13780.1,Orysa4|Os06g38830.1,Orysa4|Os08  
g24310.1,Orysa4|Os11g40810.1,Orysa4|Os06g38760.1,Orysa4|Os06g38730.1,Orysa4|Os06g38670.1,Orysa4|Os06g  
38930.1,Orysa4|Os06g38780.1,Orysa4|Os06g38640.1,Orysa4|Os06g38650.1,Orysa4|Os06g38590.1,Orysa4|Os02g1  
1980.1,Orysa4|Os02g01800.1,Orysa4|Os02g12030.1,Orysa4|Os02g12040.1,Orysa4|Os02g11930.1,Orysa4|Os04g15  
660.1,Orysa4|Os04g15630.1,Orysa4|Os04g15650.1  
AT5G51560,AT2G45340,AT4G22730 Orysa4|Os06g04370.1,Orysa4|Os08g02440.1  
Orysa4|Os10g19850.1,Orysa4|Os12g33600.1  
Orysa4|Os02g12340.1  
AT5G39720,AT5G39730,AT3G28940,AT3G28930,AT3G28950,AT4G31310,AT2G24390  
Orysa4|Os02g04800.1,Orysa4|Os06g48960.1  
AT2G03820 Orysa4|Os10g42320.1  
Orysa4|Os10g35360.1  
Orysa4|Os10g36729.1,Orysa4|Os10g40740.1  
Orysa4|Os06g08500.1,Orysa4|Os02g55250.1  
AT2G14760,AT4G33880,AT5G43175,AT1G27740 Orysa4|Os07g39940.1,Orysa4|Os03g10770.1  
AT4G30980,AT2G24260  
Orysa4|Os09g25040.1  
Orysa4|Os03g55550.1  
Orysa4|Os03g42100.1,Orysa4|Os12g39850.1,Orysa4|Os12g32400.1,Orysa4|Os11g41640.1  
Orysa4|Os06g09370.1  
AT5G67110  
AT5G58010  
AT5G37800,AT1G66470 Orysa4|Os01g02110.1,Orysa4|Os02g48060.1  
AT4G02590,AT1G03040 Orysa4|Os07g08440.1,Orysa4|Os03g58330.1  
AT1G75200 Orysa4|Os10g22110.1,Orysa4|Os03g56390.1  
AT3G15150 Orysa4|Os05g48880.1  
AT2G14680 Orysa4|Os03g31730.1  
AT4G05070 Orysa4|Os04g54210.1  
Orysa4|Os08g41430.1,Orysa4|Os02g33250.1  
AT4G35520 Orysa4|Os09g37930.1  
AT2G35810,AT2G35830,AT2G35820  
Orysa4|Os01g61670.1  
Orysa4|Os04g25390.1  
Orysa4|Os01g64900.1  
AT5G47690  
AT5G10950  
AT1G77600  
AT4G31880,AT1G80810,AT1G15940 Orysa4|Os02g39920.1  
Orysa4|Os06g27830.1  
Orysa4|Os01g43370.1  
AT1G64140  
AT5G09670,AT5G64550 Orysa4|Os02g36590.1,Orysa4|Os04g38520.1,Orysa4|Os04g54830.1  
Orysa4|Os02g15880.1,Orysa4|Os06g33180.1  
AT3G16250 Orysa4|Os07g30670.1  
AT4G32590 Orysa4|Os05g48160.1  
AT5G41150 Orysa4|Os03g01100.1  
AT3G58600 Orysa4|Os01g42830.1  
AT2G31150,AT1G06190 Orysa4|Os03g08480.1  
AT4G30920,AT4G30910,AT2G24200 Orysa4|Os12g24650.1,Orysa4|Os02g55140.1  
AT4G00860,AT1G01170  
Orysa4|Os11g06240.1,Orysa4|Os06g02470.1,Orysa4|Os06g02420.1  
Orysa4|Os04g41980.1  
AT5G02710 Orysa4|Os03g24844.1  
AT1G09150 Orysa4|Os01g21180.1  
AT1G08380 Orysa4|Os04g33830.1  
AT1G20450,AT1G20440,AT1G76180 Orysa4|Os02g44870.1  
AT4G38410  
AT3G19810 Orysa4|Os04g01780.1  
AT1G22700  
Orysa4|Os08g25890.1,Orysa4|Os10g32300.1  
AT2G19720,AT4G29430 Orysa4|Os02g15610.1  
AT5G59850,AT1G07770,AT3G46040  
AT2G39590  
Orysa4|Os07g10720.1,Orysa4|Os02g27760.1  
Orysa4|Os02g16880.1  
AT1G43130  
AT2G18460  
AT2G20130,AT2G20120 Orysa4|Os05g45280.1  
Orysa4|Os01g64780.1,Orysa4|Os05g36110.1  
Orysa4|Os12g29750.1  
AT3G62210,AT3G62200,AT5G61180,AT3G60940,AT5G61190,AT3G56730,AT5G64590,AT3G13280,AT3G62850,AT4  
G30760,AT3G62050,AT2G19890,AT3G62460,AT3G61100,AT3G61090,AT5G64450  
Orysa4|Os03g25420.1,Orysa4|Os07g44320.1  
AT1G07280,AT2G29670,AT3G47080 Orysa4|Os08g29390.1,Orysa4|Os05g37520.1,Orysa4|Os01g63620.1  
Orysa4|Os10g35800.1  
AT3G54120 Orysa4|Os01g63240.1,Orysa4|Os04g29920.1  
AT3G61560,AT2G46170  
AT5G41600,AT1G64090,AT4G11220,AT4G23630

Orysa4|Os01g53520.1,Orysa4|Os05g45050.1,Orysa4|Os01g12650.1  
Orysa4|Os02g16620.1,Orysa4|Os06g30750.1  
AT2G23640,AT1G68230,AT2G01240  
AT4G01230  
AT3G10260 Orysa4|Os07g04910.1,Orysa4|Os03g56900.1  
Orysa4|Os05g24770.1  
AT3G10915 Orysa4|Os03g21840.1  
AT3G19460,AT2G15280 Orysa4|Os04g57420.1  
AT3G18260 Orysa4|Os01g04640.1,Orysa4|Os05g47690.1  
Orysa4|Os02g24340.1  
AT5G60620 Orysa4|Os07g34730.1  
AT4G11060Orysa4|Os05g43440.1  
AT3G62900,AT1G02990,AT4G15730 Orysa4|Os03g22580.1,Orysa4|Os07g47360.1  
AT1G09870 Orysa4|Os03g60370.1  
AT3G09925 Orysa4|Os10g39890.1  
AT5G05500  
Orysa4|Os01g06990.1,Orysa4|Os01g07020.1,Orysa4|Os01g06960.1,Orysa4|Os01g07010.1,Orysa4|Os01g06940.1,Orysa4|Os01g07000.1,Orysa4|Os01g07040.1,Orysa4|Os01g07030.1,Orysa4|Os01g07060.1  
AT4G21280,AT4G05180 Orysa4|Os07g36080.1  
AT2G01918 Orysa4|Os04g44200.1  
AT1G69330  
AT3G29270 Orysa4|Os03g11260.1,Orysa4|Os03g31320.1  
AT1G74370  
AT4G28550,AT2G20440  
AT5G54780,AT4G27100 Orysa4|Os07g34130.1  
AT1G19380,AT4G36660,AT5G65650 Orysa4|Os07g41660.1  
AT1G06210  
Orysa4|Os10g42730.1  
AT5G16880 Orysa4|Os02g46962.1  
AT4G31805,AT5G10890,AT3G09730  
Orysa4|Os06g08520.1,Orysa4|Os02g55190.1,Orysa4|Os02g08470.1,Orysa4|Os06g43990.1  
AT1G17760 Orysa4|Os12g38380.1  
AT3G18770 Orysa4|Os11g06320.1  
AT3G49590 Orysa4|Os04g45570.1,Orysa4|Os02g43040.1  
AT1G34245 Orysa4|Os04g38470.1  
AT2G20875  
AT2G07751 Orysa4|Os12g34130.1  
Orysa4|Os12g34070.1  
AT5G39900  
AT5G08650 Orysa4|Os02g06300.1  
AT1G78050,AT1G22170  
Orysa4|Os06g11960.1  
AT5G19900 Orysa4|Os09g38070.1,Orysa4|Os02g58570.1  
AT2G31740 Orysa4|Os04g31000.1  
AT1G51130,AT3G20760 Orysa4|Os02g10090.1,Orysa4|Os06g41380.1  
Orysa4|Os04g10870.1,Orysa4|Os08g40010.1  
AT2G30600 Orysa4|Os05g27880.1  
Orysa4|Os01g53820.1  
AT2G39270,AT2G37250 Orysa4|Os03g03820.1,Orysa4|Os04g57540.1  
AT3G01820 Orysa4|Os08g02540.1  
AT3G13120 Orysa4|Os03g10060.1  
AT1G16070 Orysa4|Os02g08310.1  
AT1G03030 Orysa4|Os12g40880.1  
Orysa4|Os04g41300.1  
AT3G01800  
AT1G50120 Orysa4|Os06g41440.1  
AT1G71820 Orysa4|Os02g51430.1  
Orysa4|Os05g32610.1  
Orysa4|Os08g19270.1,Orysa4|Os06g14440.1,Orysa4|Os07g25390.1,Orysa4|Os08g14610.1,Orysa4|Os08g19260.1  
AT2G16390,AT2G21450  
Orysa4|Os03g06920.1  
AT1G05480,AT3G24340 Orysa4|Os02g43460.1  
AT3G25850,AT1G45243  
AT4G09690  
AT5G01480  
AT3G06990,AT3G07000,AT1G58037,AT5G45730,AT5G29624,AT5G54050,AT5G54030,AT5G54040,AT5G54020,AT4G14980,AT5G44770,AT2G04500,AT5G40320,AT4G11540,AT4G11550,AT4G11390,AT4G01930,AT4G01910,AT4G01920,AT4G02180,AT4G01925,AT4G01740,AT4G01760,AT4G02190,AT1G69150,AT3G43890,AT1G65180,AT4G01350,AT5G59920,AT5G59940,AT5G59930,AT5G22355,AT3G45840,AT3G48400,AT5G37620,AT2G04680,AT2G19660,AT2G19650,AT3G46810,AT3G46800,AT5G42840,AT3G27473,AT3G28650,AT3G45530,AT3G27510,AT3G27500,AT3G27480,AT3G27490,AT2G43220,AT4G16015,AT5G43040,AT5G43030,AT5G26190,AT1G55380,AT1G55420,AT1G55430,AT1G55390,AT5G42280,AT1G55440,AT2G23100,AT1G55700,AT3G11390,AT3G11385,AT3G11370,AT3G11402,AT2G17590,AT2G17600,AT1G35610,AT3G13760,AT5G17960,AT3G59120,AT2G02640,AT2G02610,AT2G02630,AT2G02690,AT2G02620,AT2G02700,AT2G02680,AT2G40050,AT1G61840,AT3G26550,AT4G10370,AT5G46670,AT5G46660,AT5G55780,AT1G44050,AT5G55800,AT5G55770,AT5G02350,AT2G13900,AT5G02330,AT2G13950,AT5G02340,AT5G02360,AT1G53340,AT1G61710,AT1G34480,AT3G21210,AT3G13590,AT2G28460,AT4G10560,AT1G44020,AT1G44030,AT1G29180,AT4G26380,AT5G03360,AT5G37210,AT4G02540,AT1G62030,AT3G26250,AT3G26240,AT4G15070,AT5G48320,AT4G13130,AT1G66450,AT1G66440,AT3G50010  
AT3G59130  
Orysa4|Os07g42030.1  
AT2G37810,AT2G37800,AT2G37820

AT2G21810  
AT1G29179,AT2G27660,AT2G44400,AT2G44390,AT2G44380,AT5G43520,AT2G28270,AT2G17740,AT2G44370,AT5  
G40590,AT2G42060,AT5G16430,AT2G21850,AT2G21830,AT2G21840  
Orysa4|Os07g39290.1,Orysa4|Os06g08770.1  
AT5G22330 Orysa4|Os07g08170.1,Orysa4|Os01g62040.1  
AT3G49830,AT5G67630  
Orysa4|Os01g68540.1  
AT3G07880,AT1G12070,AT1G62450 Orysa4|Os06g21340.1,Orysa4|Os02g48730.1  
AT5G55060 Orysa4|Os07g32670.1  
AT3G01440 Orysa4|Os07g01480.1  
AT2G47580 Orysa4|Os05g06280.1  
AT3G16630,AT4G15885 Orysa4|Os01g43580.1  
AT1G06960,AT2G30260  
Orysa4|Os03g18720.1  
AT3G53640,AT1G13350,AT3G25840 Orysa4|Os03g50230.1  
Orysa4|Os12g44330.1  
AT2G25950 Orysa4|Os01g37832.1  
AT3G12350 Orysa4|Os12g32630.1  
AT2G33260 Orysa4|Os07g12330.1  
AT5G22820 Orysa4|Os03g47980.1  
AT3G22845 Orysa4|Os03g53310.1  
AT3G07680 Orysa4|Os09g32968.1,Orysa4|Os08g42050.1  
AT5G41020 Orysa4|Os05g11630.1,Orysa4|Os06g19980.1  
AT1G66245  
AT1G11380Orysa4|Os07g36820.1  
AT1G04420 Orysa4|Os03g41510.1  
Orysa4|Os11g42540.1  
AT5G21940 Orysa4|Os08g35630.1  
AT3G43850 Orysa4|Os06g10220.1,Orysa4|Os02g53830.1  
AT3G57150 Orysa4|Os03g25450.1,Orysa4|Os07g44190.1,Orysa4|Os11g38600.1,Orysa4|Os04g48700.1  
AT1G02870 Orysa4|Os05g30420.1  
Orysa4|Os11g43900.1  
AT3G16640  
AT3G05540  
AT1G19370,AT1G75140 Orysa4|Os06g02480.1  
AT1G47970,AT3G17160 Orysa4|Os01g22990.1  
AT4G29905,AT5G57123,AT5G10695 Orysa4|Os08g13400.1,Orysa4|Os04g51680.1,Orysa4|Os06g44980.1  
AT5G40190,AT3G28140 Orysa4|Os09g20860.1  
AT1G48130 Orysa4|Os07g44440.1,Orysa4|Os07g44430.1  
AT2G20210 Orysa4|Os12g12740.1  
Orysa4|Os09g12600.1  
AT5G46110Orysa4|Os05g15160.1,Orysa4|Os01g13770.1  
AT4G03950  
Orysa4|Os07g33954.1,Orysa4|Os07g33910.1,Orysa4|Os07g34006.1  
AT5G17630  
AT1G61800,AT5G54800 Orysa4|Os08g08840.1  
AT1G43310,AT5G33320  
AT3G01550  
Orysa4|Os03g56600.1  
AT3G48380 Orysa4|Os12g18760.1  
AT1G27440,AT5G61840 Orysa4|Os04g32670.1,Orysa4|Os02g32110.1,Orysa4|Os01g70200.1  
Orysa4|Os01g70180.1  
AT2G28110,AT5G22940 Orysa4|Os03g01760.1  
Orysa4|Os10g10080.1  
AT3G50640,AT5G66800,AT3G19200 Orysa4|Os08g36950.1,Orysa4|Os09g28520.1,Orysa4|Os02g52490.1  
AT5G52800 Orysa4|Os07g28470.1  
AT1G07700 Orysa4|Os02g35900.1  
AT2G46280,AT2G46290 Orysa4|Os05g16660.1,Orysa4|Os08g21660.1,Orysa4|Os11g39300.1  
Orysa4|Os06g19640.1  
AT1G14620  
AT2G17787,AT4G35940 Orysa4|Os10g03550.1  
AT1G27400,AT1G67430 Orysa4|Os08g41810.1,Orysa4|Os09g08430.1  
AT4G40100,AT2G22475 Orysa4|Os09g29120.1,Orysa4|Os06g11430.1  
AT4G01600  
Orysa4|Os07g42890.1,Orysa4|Os03g08860.1  
AT5G23360,AT5G23350,AT5G23370,AT5G08350  
Orysa4|Os04g44510.1,Orysa4|Os02g42440.1,Orysa4|Os02g42430.1,Orysa4|Os04g44500.1  
AT1G28200  
AT5G13200 Orysa4|Os12g29400.1  
Orysa4|Os03g52670.1  
AT2G29180 Orysa4|Os03g16470.1  
AT5G65980,AT2G17500 Orysa4|Os09g38210.1,Orysa4|Os09g38130.1  
AT1G76520,AT1G76530,AT1G20925 Orysa4|Os09g31478.1  
AT5G39530,AT5G39520 Orysa4|Os10g43030.1,Orysa4|Os03g07200.1  
Orysa4|Os03g48080.1  
AT5G09570  
AT5G64400  
Orysa4|Os12g44080.1  
AT5G03730 Orysa4|Os09g39320.1,Orysa4|Os02g32610.1  
AT4G24480 Orysa4|Os04g52140.1  
AT4G17790 Orysa4|Os04g50216.1,Orysa4|Os02g46660.1  
AT4G09580,AT1G71940 Orysa4|Os03g49700.1



AT2G40090 Orysa4|Os03g49140.1  
AT5G19930 Orysa4|Os01g08290.1,Orysa4|Os01g32280.1  
AT1G60430 Orysa4|Os02g14000.1  
Orysa4|Os05g42010.1  
AT2G32340,AT1G05270  
AT5G57880 Orysa4|Os08g44180.1  
AT3G47610 Orysa4|Os09g24660.1  
AT1G31170Orysa4|Os06g07760.1  
AT3G17860,AT1G48500,AT1G70700 Orysa4|Os09g23660.1  
AT5G46150 Orysa4|Os03g57170.1  
AT1G79450,AT1G16360,AT1G54320,AT3G12740  
Orysa4|Os02g07750.1,Orysa4|Os06g45430.1,Orysa4|Os09g38768.1  
Orysa4|Os05g45370.1,Orysa4|Os03g02830.1  
AT5G65490 Orysa4|Os08g34740.1  
AT5G23130,AT5G08200 Orysa4|Os06g51360.1,Orysa4|Os10g34420.1  
AT1G54350 Orysa4|Os01g11946.1  
AT1G24280,AT5G13110 Orysa4|Os07g22350.1  
AT5G40760,AT3G27300 Orysa4|Os02g38840.1  
AT5G35790 Orysa4|Os03g29950.1  
AT1G09420 Orysa4|Os03g20300.1  
AT5G35080 Orysa4|Os06g43710.1  
AT3G47650  
Orysa4|Os06g22690.1  
AT5G04460 Orysa4|Os09g39690.1  
Orysa4|Os03g01720.1  
AT2G27950 Orysa4|Os07g31650.1  
AT5G57840  
Orysa4|Os10g03360.1,Orysa4|Os10g03390.1,Orysa4|Os10g02000.1,Orysa4|Os10g01930.1,Orysa4|Os10g01800.1,Orysa4|Os10g01920.1,Orysa4|Os04g09590.1,Orysa4|Os04g11810.1,Orysa4|Os06g48560.1,Orysa4|Os04g09260.1  
Orysa4|Os10g30490.1,Orysa4|Os03g48890.1,Orysa4|Os11g40230.1  
AT5G41040 Orysa4|Os11g31090.1  
AT1G27620 Orysa4|Os01g01520.1  
Orysa4|Os01g42870.1,Orysa4|Os01g42880.1,Orysa4|Os09g13450.1  
Orysa4|Os05g25150.1,Orysa4|Os05g22300.1,Orysa4|Os07g36560.1,Orysa4|Os05g06380.1,Orysa4|Os04g42830.1,Orysa4|Os06g49660.1  
AT4G31910  
AT5G17540,AT3G03480 Orysa4|Os10g35950.1  
AT1G32910,AT1G78990,AT5G16410 Orysa4|Os04g51980.1,Orysa4|Os04g51990.1  
AT5G48930 Orysa4|Os02g39850.1,Orysa4|Os04g42250.1  
Orysa4|Os09g33700.1  
AT1G03390  
Orysa4|Os11g42290.1,Orysa4|Os11g42370.1,Orysa4|Os03g08720.1,Orysa4|Os10g23310.1,Orysa4|Os10g23820.1,Orysa4|Os10g18430.1,Orysa4|Os05g02590.1,Orysa4|Os03g47860.1,Orysa4|Os09g37200.1,Orysa4|Os09g37180.1,Orysa4|Os04g56910.1  
Orysa4|Os12g27330.1  
AT1G28680 Orysa4|Os06g06180.1  
AT2G40230  
Orysa4|Os10g01690.1,Orysa4|Os10g01720.1,Orysa4|Os10g01680.1,Orysa4|Os10g01700.1  
AT1G65445  
AT2G19070  
AT1G31490  
Orysa4|Os10g01650.1,Orysa4|Os03g45740.1,Orysa4|Os07g23960.1,Orysa4|Os12g27254.1,Orysa4|Os12g27220.1,Orysa4|Os12g27350.1,Orysa4|Os10g04400.1,Orysa4|Os10g04429.1  
Orysa4|Os08g43020.1,Orysa4|Os08g43040.1,Orysa4|Os08g10420.1,Orysa4|Os09g25460.1,Orysa4|Os06g08580.1,Orysa4|Os06g08640.1  
Orysa4|Os11g42380.1  
Orysa4|Os07g40880.1,Orysa4|Os10g18410.1,Orysa4|Os02g47040.1,Orysa4|Os01g65610.1  
AT3G62160  
Orysa4|Os05g08640.1,Orysa4|Os01g08380.1,Orysa4|Os06g39470.1,Orysa4|Os01g18744.1,Orysa4|Os05g04584.1,Orysa4|Os05g19910.1,Orysa4|Os01g09010.1,Orysa4|Os06g39390.1  
Orysa4|Os05g04930.1,Orysa4|Os07g14080.1,Orysa4|Os01g24790.1  
AT5G63560,AT3G48720  
AT2G23510,AT2G25150,AT5G07080,AT3G47170,AT1G65450  
AT2G34910,AT1G30850,AT5G44660,AT4G20190 Orysa4|Os07g31660.1,Orysa4|Os06g37600.1  
AT4G34730 Orysa4|Os06g04610.1  
AT2G34357 Orysa4|Os02g54110.1  
AT4G23540 Orysa4|Os01g72780.1  
AT3G13445,AT1G55520 Orysa4|Os10g29660.1  
Orysa4|Os12g39070.1,Orysa4|Os03g45410.1  
Orysa4|Os02g55370.1,Orysa4|Os02g55390.1,Orysa4|Os06g08320.1  
AT3G02190,AT4G31985,AT2G25210  
AT1G18500,AT1G74040 Orysa4|Os12g04440.1,Orysa4|Os11g04670.1  
AT5G23020,AT5G23010  
AT1G25988,AT1G25682 Orysa4|Os02g21880.1  
AT5G35630 Orysa4|Os04g56400.1  
AT5G16570  
AT1G66200,AT5G37600  
Orysa4|Os02g50240.1  
AT1G48470,AT3G17820 Orysa4|Os03g50490.1  
AT5G19130 Orysa4|Os01g48980.1  
AT5G40770,AT3G27280 Orysa4|Os04g38900.1,Orysa4|Os02g37000.1

AT2G20530,AT4G28510,AT5G44140,AT1G03860  
Orysa4|Os03g60000.1,Orysa4|Os03g62490.1,Orysa4|Os07g15880.1  
AT5G14300  
Orysa4|Os03g59840.1  
AT2G22640 Orysa4|Os02g58320.1  
AT1G29120 Orysa4|Os06g06080.1  
AT4G25770  
Orysa4|Os02g43850.1  
AT1G10040 Orysa4|Os03g51670.1  
AT5G51180  
AT3G29280 Orysa4|Os03g11130.1,Orysa4|Os03g15190.1  
AT1G14570 Orysa4|Os04g57520.1  
Orysa4|Os07g19390.1,Orysa4|Os02g42800.1  
AT1G59550,AT4G14250,AT3G23605  
AT4G30870,AT5G39770 Orysa4|Os01g71960.1  
AT2G23600,AT2G23590,AT2G23620,AT2G23570,AT2G23550,AT2G23580,AT2G23560,AT2G23610,AT4G37140,AT4  
G37150,AT5G10300  
Orysa4|Os05g30780.1,Orysa4|Os05g30760.1,Orysa4|Os11g30030.1,Orysa4|Os01g70850.1,Orysa4|Os01  
g70860.1,Orysa4|Os01g70830.1,Orysa4|Os01g37630.1,Orysa4|Os01g25360.1,Orysa4|Os01g37650.1,Orysa4|Os01g  
57770.1  
Orysa4|Os11g30040.1  
AT3G50440  
AT4G17610 Orysa4|Os10g05290.1,Orysa4|Os03g01110.1,Orysa4|Os06g28730.1,Orysa4|Os10g25300.1,Orysa4|Os07  
g40390.1  
AT3G56110,AT2G40380,AT5G05380,AT2G38360,AT5G01640,AT5G07110  
Orysa4|Os01g61170.1,Orysa4|Os05g39670.1,Orysa4|Os12g01690.1  
AT4G29658  
AT1G08770  
AT5G56230,AT1G55640,AT1G04260  
AT3G13710,AT3G13720,AT1G55190 Orysa4|Os01g10010.1,Orysa4|Os05g11120.1  
Orysa4|Os07g41940.1,Orysa4|Os03g53070.1,Orysa4|Os03g58410.1  
AT1G17700  
AT4G03520,AT1G03680  
AT1G76760,AT1G43560  
Orysa4|Os12g08730.1  
Orysa4|Os04g44830.1,Orysa4|Os02g42700.1  
AT2G15570 Orysa4|Os04g35150.1  
AT3G06730 Orysa4|Os08g29110.1  
AT1G50320 Orysa4|Os04g57930.1  
AT3G15360  
AT4G12170  
AT1G80380  
Orysa4|Os01g48990.1  
Orysa4|Os10g33630.1  
AT1G03900  
AT5G60430,AT2G16650  
Orysa4|Os02g17360.1  
AT2G32230 Orysa4|Os04g59600.1  
AT4G30940,AT2G24240 Orysa4|Os02g39910.1,Orysa4|Os04g42310.1  
AT5G18440 Orysa4|Os01g59860.1  
AT4G35140,AT4G38480 Orysa4|Os06g50880.1  
Orysa4|Os10g39760.1  
AT3G45620 Orysa4|Os03g17780.1  
AT1G53250,AT1G53800 Orysa4|Os10g12354.1  
AT4G09140 Orysa4|Os01g72880.1  
AT5G18200 Orysa4|Os07g07550.1  
AT4G37460 Orysa4|Os07g02300.1  
AT5G23630 Orysa4|Os05g33390.1  
AT5G62270 Orysa4|Os01g58750.1  
AT2G20825,AT4G28190 Orysa4|Os05g42290.1,Orysa4|Os01g57240.1  
AT2G01490 Orysa4|Os05g39650.1,Orysa4|Os03g50040.1  
AT4G26910,AT5G55070 Orysa4|Os02g31040.1,Orysa4|Os04g32330.1  
AT3G57190  
AT5G20320 Orysa4|Os04g43050.1  
AT3G03300 Orysa4|Os09g14610.1,Orysa4|Os03g38740.1  
AT1G56350 Orysa4|Os03g19300.1  
AT5G36170  
Orysa4|Os10g21100.1,Orysa4|Os03g10469.1  
AT4G38300,AT4G38650 Orysa4|Os03g14010.1  
AT4G33810,AT4G33820,AT2G14690  
AT4G33830,AT4G33840,AT4G33850,AT4G33860 Orysa4|Os03g10440.1,Orysa4|Os03g10478.1  
AT1G15110,Orysa4|Os01g49020.1,Orysa4|Os05g48060.1  
Orysa4|Os03g45290.1  
Orysa4|Os01g61330.1  
AT4G19150 Orysa4|Os10g43040.1  
AT2G03430 Orysa4|Os03g55110.1  
AT5G13970  
AT5G13310 Orysa4|Os04g32580.1  
Orysa4|Os11g19770.1  
AT4G24830 Orysa4|Os12g13320.1  
AT2G23930,AT3G11500 Orysa4|Os07g41790.1,Orysa4|Os03g29740.1

AT3G54440 Orysa4|Os01g72340.1  
AT2G21950,AT2G44700,AT2G44630,AT4G02310,AT2G22030,AT2G22050,AT2G41360,AT3G46050,AT5G03000,AT5  
G03010,AT5G03020,AT5G02980,AT5G02990,AT2G44030,AT1G77880,AT4G19865,AT4G19870,AT4G19330,AT4G19  
250,AT4G39060,AT4G39760,AT5G28180,AT5G28160,AT4G39753,AT4G39756,AT4G39750,AT4G35120,AT4G29370,  
AT5G39560,AT4G39560,AT4G39550,AT5G49000,AT4G39570,AT1G19930,AT1G60570,AT2G03460,AT5G51250,AT3  
G08810,AT3G06570,AT4G25710,AT5G38680,AT5G38670,AT2G20380,AT5G48990,AT5G48980,AT4G39600,AT4G39  
580,AT4G05620,AT2G22060,AT1G48190,AT1G61540,AT4G39590,AT4G11750,AT4G11770,AT4G11745,AT4G23580,  
AT4G33900,AT4G34170,AT4G39290,AT3G43710,AT4G14905,AT4G39240,AT3G27910,AT2G29800,AT2G29600,AT2  
G29810,AT2G29770,AT2G29780,AT2G29820,AT2G29830,AT2G29860,AT2G29610,AT1G19470,AT1G19460,AT2G21  
680,AT3G10510,AT4G38940,AT4G36840,AT3G24610 Orysa4|Os07g47650.1  
AT5G41480 Orysa4|Os12g42870.1  
AT4G08230  
Orysa4|Os03g15720.1  
AT3G49920,AT5G67500 Orysa4|Os03g10510.1  
AT5G37610  
AT5G15090,AT3G01280 Orysa4|Os05g45950.1,Orysa4|Os01g51770.1,Orysa4|Os01g40570.1  
AT1G35513,AT1G74710,AT1G18870 Orysa4|Os09g19734.1  
AT5G57490 Orysa4|Os03g04460.1  
AT5G65950 Orysa4|Os02g48380.1  
AT2G39810 Orysa4|Os03g52700.1  
Orysa4|Os03g52710.1  
Orysa4|Os04g35590.1  
AT2G29590 Orysa4|Os01g65950.1,Orysa4|Os02g32200.1  
AT1G04290 Orysa4|Os01g65960.1  
Orysa4|Os04g38950.1  
AT5G57890,AT1G25220,AT1G24909,AT1G25083,AT1G25155,AT1G24807 Orysa4|Os03g50880.1  
AT3G55330  
AT2G39470 Orysa4|Os08g25920.1  
Orysa4|Os10g32348.1,Orysa4|Os10g32400.1  
AT1G72050 Orysa4|Os02g02424.1,Orysa4|Os05g03020.1  
AT1G77320 Orysa4|Os11g08660.1  
AT2G37190,AT3G53430,AT5G60670 Orysa4|Os04g50990.1,Orysa4|Os02g47140.1  
AT3G21360 Orysa4|Os01g09430.1  
Orysa4|Os08g29510.1  
AT1G79400,AT1G16380 Orysa4|Os08g43690.1,Orysa4|Os02g58660.1  
AT2G13620 Orysa4|Os01g60140.1,Orysa4|Os05g40650.1  
AT3G52080 Orysa4|Os12g44300.1  
AT1G08135,AT1G08140,AT1G08150,AT2G28180,AT3G44900,AT5G22900,AT3G44930,AT3G44920,AT3G44910,AT5  
G22910  
AT2G28170  
Orysa4|Os10g05450.1  
AT5G58460,AT5G37060  
AT2G31910,AT1G05580  
AT3G17630 Orysa4|Os12g42200.1,Orysa4|Os05g19500.1  
Orysa4|Os05g39600.1  
Orysa4|Os11g03070.1,Orysa4|Os12g02840.1  
Orysa4|Os12g01820.1,Orysa4|Os11g01820.1,Orysa4|Os08g02450.1  
AT2G30240,AT1G06970,AT5G01690,AT5G01680  
Orysa4|Os01g73810.1,Orysa4|Os05g31730.1  
Orysa4|Os08g36250.1  
AT1G64170  
AT4G23700,AT5G41610  
AT3G53720 Orysa4|Os05g02240.1  
AT5G48960 Orysa4|Os01g14810.1  
AT5G45170  
Orysa4|Os12g43520.1  
Orysa4|Os06g19840.1  
AT5G62530 Orysa4|Os05g45960.1  
AT3G51130 Orysa4|Os06g49990.1  
AT1G19080 Orysa4|Os08g17294.1  
AT1G69485,AT1G26740 Orysa4|Os10g26690.1,Orysa4|Os03g07290.1  
Orysa4|Os12g42260.1,Orysa4|Os03g44310.1  
AT1G48970,AT5G38640,AT2G44070  
AT2G22530 Orysa4|Os02g54070.1  
AT3G27180 Orysa4|Os01g69120.1  
AT4G08200,AT5G41980,AT5G35695  
Orysa4|Os07g48400.1,Orysa4|Os04g32890.1,Orysa4|Os11g06790.1,Orysa4|Os12g10770.1  
AT4G21720 Orysa4|Os04g58380.1  
AT3G13780 Orysa4|Os06g36940.1  
Orysa4|Os08g24390.1  
AT1G64430  
AT3G18730 Orysa4|Os02g54290.1,Orysa4|Os02g54170.1  
AT5G51120  
AT5G10350,AT5G65260 Orysa4|Os06g11620.1,Orysa4|Os02g52140.1  
AT5G54130,AT5G54120,AT1G02270 Orysa4|Os10g13550.1  
AT5G10940 Orysa4|Os03g08830.1  
AT1G54990 Orysa4|Os11g34140.1  
AT3G15380 Orysa4|Os04g58504.1,Orysa4|Os04g58470.1  
AT2G27100  
Orysa4|Os06g48530.1,Orysa4|Os08g40560.1  
Orysa4|Os08g40540.1  
AT4G12640 Orysa4|Os09g12730.1

AT1G61670,AT1G10980 Orysa4|Os03g21690.1  
AT1G72480 Orysa4|Os09g26830.1  
AT2G01070 Orysa4|Os11g34360.1  
Orysa4|Os07g42310.1  
AT2G23840 Orysa4|Os07g07480.1  
AT4G38110Orysa4|Os08g05670.1  
Orysa4|Os01g62350.1,Orysa4|Os05g38520.1  
AT2G37600,AT3G53740,AT5G02450  
AT1G56320 Orysa4|Os05g28780.1,Orysa4|Os03g19170.1,Orysa4|Os01g14990.1  
AT5G42680 Orysa4|Os08g37150.1,Orysa4|Os09g28880.1  
AT2G41660  
AT3G25640,AT5G23100 Orysa4|Os01g45510.1,Orysa4|Os05g50160.1  
AT5G06990,AT2G21990,AT4G39610 Orysa4|Os01g59200.1,Orysa4|Os03g59690.1  
AT2G37880 Orysa4|Os05g20030.1  
Orysa4|Os12g36070.1,Orysa4|Os03g52290.1,Orysa4|Os01g16320.1  
Orysa4|Os02g47980.1,Orysa4|Os06g30030.1  
AT1G21050,AT1G76610,AT2G22460,AT5G65340  
Orysa4|Os04g54600.1,Orysa4|Os08g07500.1  
AT1G05910 Orysa4|Os09g33980.1  
Orysa4|Os03g62650.1  
Orysa4|Os01g64980.1  
AT5G49960  
AT2G35320 Orysa4|Os06g02028.1  
Orysa4|Os10g08570.1  
Orysa4|Os07g27110.1  
Orysa4|Os07g08320.1  
AT2G44710 Orysa4|Os04g45930.1  
AT3G51510 Orysa4|Os05g41190.1  
Orysa4|Os03g05250.1  
AT5G40880,AT5G49200 Orysa4|Os01g09252.1  
AT4G25440,AT5G51980 Orysa4|Os02g45480.1  
Orysa4|Os03g05210.1  
AT1G44414 Orysa4|Os05g35970.1  
AT1G13360,AT3G25870 Orysa4|Os01g04010.1  
AT3G07220,AT3G07260 Orysa4|Os08g41710.1  
Orysa4|Os11g27530.1  
Orysa4|Os09g32750.1  
Orysa4|Os02g03040.1  
AT4G25500,AT5G52040  
AT2G46610,AT3G61860 Orysa4|Os04g02870.1  
AT1G16430,AT1G07950 Orysa4|Os01g04110.1  
AT1G07040  
AT1G27020,AT1G27030 Orysa4|Os10g32680.1  
AT2G34585 Orysa4|Os07g05950.1  
AT1G73440 Orysa4|Os04g45180.1  
AT4G33480 Orysa4|Os04g59570.1  
AT5G45740 Orysa4|Os05g45320.1  
AT1G16960 Orysa4|Os09g17620.1  
AT1G53400  
AT1G73380 Orysa4|Os10g34810.1  
AT3G57470,AT2G41790,AT3G57460  
Orysa4|Os07g38270.1,Orysa4|Os07g38280.1,Orysa4|Os07g38260.1  
AT5G01440  
AT1G06900 Orysa4|Os03g21810.1  
Orysa4|Os01g57082.1  
AT5G25620,AT4G13260 Orysa4|Os05g45240.1,Orysa4|Os01g53200.1  
Orysa4|Os12g32750.1  
Orysa4|Os03g06654.1  
AT5G11320,AT4G32540 Orysa4|Os01g45760.1  
AT1G21430,AT1G48910  
Orysa4|Os11g10140.1,Orysa4|Os11g10170.1,Orysa4|Os02g17230.1,Orysa4|Os12g08780.1  
AT4G28720,AT1G04180,AT5G43890,AT2G33230,AT1G04610 Orysa4|Os07g25540.1,Orysa4|Os04g03980.1  
Orysa4|Os11g19070.1,Orysa4|Os01g25470.1  
Orysa4|Os01g12490.1  
Orysa4|Os01g16750.1  
AT3G51260,AT5G66140 Orysa4|Os08g43540.1  
AT1G47250,AT5G42790 Orysa4|Os02g04100.1  
AT3G20490 Orysa4|Os04g53360.1,Orysa4|Os12g05070.1  
AT1G21090 Orysa4|Os04g34540.1,Orysa4|Os02g33790.1,Orysa4|Os01g73270.1  
AT5G20980  
Orysa4|Os12g42884.1  
AT3G03780,AT5G17920  
AT3G56950 Orysa4|Os03g20410.1  
AT3G12040 Orysa4|Os02g53430.1  
AT5G11240Orysa4|Os03g18840.1  
Orysa4|Os01g46060.1  
AT4G12670  
AT5G03780,AT1G01150 Orysa4|Os11g06190.1  
AT3G21175,AT1G51600  
AT4G24470 Orysa4|Os02g05510.1  
Orysa4|Os03g52450.1,Orysa4|Os03g47970.1  
AT5G66120 Orysa4|Os09g36800.1

AT2G28240 Orysa4|Os02g41610.1  
Orysa4|Os02g02050.1,Orysa4|Os06g01320.1  
AT1G08060 Orysa4|Os04g09670.1  
AT1G62900 Orysa4|Os12g13810.1  
AT3G53140 Orysa4|Os02g57760.1  
AT1G21120,AT1G21110,AT1G21130,AT1G21100,AT1G76790,AT1G77530,AT1G77520,AT1G63140,AT5G37170,AT5  
G53810,AT1G33030,AT5G54160,AT1G51990  
Orysa4|Os04g09680.1,Orysa4|Os04g09604.1,Orysa4|Os04g09654.1,Orysa4|Os04g01470.1,Orysa4|Os12  
g09770.1,Orysa4|Os12g10140.1,Orysa4|Os12g13800.1,Orysa4|Os08g06100.1  
Orysa4|Os12g10170.1  
Orysa4|Os01g52420.1  
AT4G22930 Orysa4|Os01g54370.1  
AT4G30990 Orysa4|Os01g40250.1  
AT2G31040 Orysa4|Os01g48300.1  
Orysa4|Os07g42420.1  
AT1G74960  
AT5G46290 Orysa4|Os04g36800.1  
AT2G04540 Orysa4|Os02g10320.1  
AT2G19940  
Orysa4|Os10g35170.1,Orysa4|Os03g42110.1  
AT5G43430 Orysa4|Os04g10400.1  
AT3G59650 Orysa4|Os03g10930.1  
Orysa4|Os01g48720.1  
AT3G49000  
AT1G60060 Orysa4|Os02g50900.1,Orysa4|Os06g12740.1  
Orysa4|Os06g40760.1,Orysa4|Os01g35420.1,Orysa4|Os05g46010.1,Orysa4|Os08g42830.1  
Orysa4|Os01g06300.1,Orysa4|Os01g40890.1  
Orysa4|Os07g45250.1,Orysa4|Os07g45180.1,Orysa4|Os07g45220.1,Orysa4|Os04g17740.1  
Orysa4|Os12g40530.1  
Orysa4|Os05g07970.1  
Orysa4|Os04g40350.1  
Orysa4|Os10g13760.1,Orysa4|Os03g59780.1  
Orysa4|Os04g38820.1,Orysa4|Os08g33450.1  
Orysa4|Os03g41850.1,Orysa4|Os08g26430.1  
Orysa4|Os05g32000.1,Orysa4|Os01g57180.1  
Orysa4|Os02g05110.1,Orysa4|Os05g01770.1,Orysa4|Os08g23270.1,Orysa4|Os02g05990.1  
Orysa4|Os11g32420.1  
Orysa4|Os01g57830.1  
Orysa4|Os04g27310.1  
Orysa4|Os11g46260.1,Orysa4|Os12g20420.1  
Orysa4|Os09g03180.1,Orysa4|Os04g12520.1,Orysa4|Os06g23580.1  
Orysa4|Os04g53010.1  
Orysa4|Os02g43990.1  
Orysa4|Os01g34670.1,Orysa4|Os02g37950.1,Orysa4|Os03g45130.1  
Orysa4|Os01g02240.1,Orysa4|Os04g38240.1,Orysa4|Os04g30190.1,Orysa4|Os03g01950.1,Orysa4|Os05  
g05990.1,Orysa4|Os04g10610.1,Orysa4|Os02g34300.1,Orysa4|Os05g43150.1,Orysa4|Os11g43350.1,Orysa4|Os05g  
04480.1  
Orysa4|Os12g11700.1,Orysa4|Os08g29410.1,Orysa4|Os12g31930.1,Orysa4|Os10g08730.1,Orysa4|Os03  
g49530.1,Orysa4|Os07g33530.1,Orysa4|Os01g60500.1,Orysa4|Os04g29590.1,Orysa4|Os01g46690.1,Orysa4|Os09g  
19870.1,Orysa4|Os05g07440.1,Orysa4|Os03g26380.1,Orysa4|Os05g30170.1,Orysa4|Os02g54950.1  
Orysa4|Os03g61460.1  
Orysa4|Os01g35410.1,Orysa4|Os02g38360.1  
AT1G64255 Orysa4|Os05g16500.1,Orysa4|Os11g44240.1,Orysa4|Os01g49950.1,Orysa4|Os03g55690.1,Orysa4|Os01  
g46660.1,Orysa4|Os12g04670.1,Orysa4|Os02g27510.1,Orysa4|Os02g46230.1,Orysa4|Os02g18440.1,Orysa4|Os08g  
36670.1,Orysa4|Os08g39620.1,Orysa4|Os11g33080.1,Orysa4|Os03g13710.1,Orysa4|Os01g61090.1,Orysa4|Os08g0  
3660.1,Orysa4|Os08g06820.1,Orysa4|Os07g30230.1,Orysa4|Os06g20210.1,Orysa4|Os01g54220.1,Orysa4|Os08g05  
450.1,Orysa4|Os06g44480.1,Orysa4|Os06g41900.1,Orysa4|Os03g28204.1,Orysa4|Os07g34310.1,Orysa4|Os01g744  
00.1,Orysa4|Os07g05770.1,Orysa4|Os05g47710.1,Orysa4|Os08g41130.1,Orysa4|Os07g17240.1,Orysa4|Os01g2076  
0.1,Orysa4|Os01g56340.1,Orysa4|Os12g31729.1,Orysa4|Os03g62350.1,Orysa4|Os03g60830.1,Orysa4|Os01g36910.  
1,Orysa4|Os03g11830.1,Orysa4|Os06g34820.1,Orysa4|Os10g18160.1,Orysa4|Os07g28130.1,Orysa4|Os09g12420.1,  
Orysa4|Os10g32560.1,Orysa4|Os06g37030.1,Orysa4|Os06g47990.1,Orysa4|Os09g37630.1,Orysa4|Os11g09120.1,  
Orysa4|Os01g15650.1,Orysa4|Os01g43970.1,Orysa4|Os05g45970.1,Orysa4|Os01g21840.1,Orysa4|Os04g56380.1,Ory  
sa4|Os02g41870.1,Orysa4|Os01g64420.1,Orysa4|Os03g19050.1,Orysa4|Os01g18480.1,Orysa4|Os01g51180.1,Ory  
sa4|Os02g09950.1,Orysa4|Os06g12900.1,Orysa4|Os04g31650.1,Orysa4|Os07g12860.1,Orysa4|Os07g42210.1,Ory  
sa4|Os09g38900.1,Orysa4|Os10g02660.1,Orysa4|Os12g16500.1,Orysa4|Os11g25520.1,Orysa4|Os07g35040.1,Ory  
sa4|Os11g44410.1,Orysa4|Os12g39150.1,Orysa4|Os02g46630.1,Orysa4|Os03g38820.1,Orysa4|Os04g53480.1,Ory  
sa4|Os12g31700.1,Orysa4|Os06g42010.1,Orysa4|Os03g52740.1,Orysa4|Os02g01620.1,Orysa4|Os01g09490.1,Ory  
sa4|Os09g37820.1,Orysa4|Os04g02350.1,Orysa4|Os01g68220.1,Orysa4|Os10g36990.1,Orysa4|Os04g51470.1,Ory  
sa4|Os01g04960.1,Orysa4|Os01g71890.1,Orysa4|Os06g14290.1,Orysa4|Os02g45960.1,Orysa4|Os10g42600.1,Ory  
sa4|Os07  
g42530.1,Orysa4|Os10g22164.1,Orysa4|Os01g26916.1,Orysa4|Os02g06110.1,Orysa4|Os04g54060.1,Orysa4|Os03g  
63030.1,Orysa4|Os06g14250.1,Orysa4|Os02g04200.1,Orysa4|Os06g50320.1,Orysa4|Os06g36470.1,Orysa4|Os07g4  
0650.1,Orysa4|Os01g47000.1,Orysa4|Os07g18060.1,Orysa4|Os07g12500.1,Orysa4|Os09g32390.1,Orysa4|Os04g58  
150.1,Orysa4|Os03g46830.1,Orysa4|Os02g45550.1,Orysa4|Os09g30370.1,Orysa4|Os06g25580.1,Orysa4|Os06g047  
70.1,Orysa4|Os11g43660.1,Orysa4|Os05g38240.1,Orysa4|Os03g19160.1,Orysa4|Os01g73870.1,Orysa4|Os04g0998  
0.1,Orysa4|Os11g47444.1,Orysa4|Os11g44210.1,Orysa4|Os10g30740.1,Orysa4|Os11g17830.1,Orysa4|Os07g46140.  
1,Orysa4|Os07g29650.1,Orysa4|Os11g35880.1,Orysa4|Os10g28650.1,Orysa4|Os07g42980.1,Orysa4|Os01g47790.1,  
Orysa4|Os04g47800.1,Orysa4|Os05g50740.1,Orysa4|Os07g13390.1,Orysa4|Os01g12040.1,Orysa4|Os07g32580.1,O  
rysa4|Os02g09110.1,Orysa4|Os02g03350.1,Orysa4|Os02g18360.1,Orysa4|Os06g19230.1,Orysa4|Os11g33290.1,Ory  
sa4|Os03g04290.1,Orysa4|Os01g60880.1,Orysa4|Os03g51310.1,Orysa4|Os04g59390.1,Orysa4|Os10g24790.1,Ory

aa4|Os11g06280.1,Orysa4|Os02g10910.1,Orysa4|Os04g53820.1,Orysa4|Os12g22150.1,Orysa4|Os06g06110.1,Orysa4|Os10g33220.1,Orysa4|Os02g58240.1,Orysa4|Os02g11730.1,Orysa4|Os01g35220.1,Orysa4|Os10g36380.1,Orysa4|Os03g16620.1,Orysa4|Os03g29900.1,Orysa4|Os01g74390.1,Orysa4|Os05g06850.1,Orysa4|Os01g72110.1,Orysa4|Os09g23670.1,Orysa4|Os12g22060.1,Orysa4|Os05g47720.1,Orysa4|Os06g37970.1,Orysa4|Os06g38360.1,Orysa4|Os12g05460.1,Orysa4|Os07g37590.1,Orysa4|Os01g03440.1,Orysa4|Os02g01690.1,Orysa4|Os05g35750.1,Orysa4|Os06g19950.1,Orysa4|Os08g41140.1,Orysa4|Os03g61450.1,Orysa4|Os05g40760.1,Orysa4|Os12g02270.1,Orysa4|Os12g10800.1,Orysa4|Os12g27390.1,Orysa4|Os03g59910.1,Orysa4|Os01g03452.1,Orysa4|Os12g21510.1  
Orysa4|Os03g03050.1  
Orysa4|Os07g20240.1,Orysa4|Os01g33240.1,Orysa4|Os12g30900.1,Orysa4|Os01g19894.1,Orysa4|Os11g13640.1,Orysa4|Os01g36250.1,Orysa4|Os04g55450.1,Orysa4|Os07g22610.1,Orysa4|Os03g05790.1,Orysa4|Os01g36260.1,Orysa4|Os03g03060.1,Orysa4|Os02g30680.1,Orysa4|Os03g02140.1,Orysa4|Os04g24730.1,Orysa4|Os11g15170.1,Orysa4|Os01g23930.1,Orysa4|Os09g17200.1,Orysa4|Os05g16910.1,Orysa4|Os06g35800.1,Orysa4|Os04g53090.1,Orysa4|Os04g02370.1,Orysa4|Os02g24280.1,Orysa4|Os08g13970.1,Orysa4|Os01g63170.1,Orysa4|Os04g41840.1,Orysa4|Os04g02420.1,Orysa4|Os04g02434.1,Orysa4|Os01g73920.1,Orysa4|Os03g47890.1,Orysa4|Os05g35610.1,Orysa4|Os11g25410.1,Orysa4|Os09g01880.1,Orysa4|Os03g59894.1  
Orysa4|Os04g43500.1,Orysa4|Os03g29880.1,Orysa4|Os06g42400.1,Orysa4|Os08g12440.1,Orysa4|Os07g20430.1,Orysa4|Os05g33370.1,Orysa4|Os02g27750.1  
Orysa4|Os10g07470.1,Orysa4|Os12g38510.1  
AT2G04865 Orysa4|Os04g55580.1  
Orysa4|Os01g41210.1  
Orysa4|Os01g62720.1  
Orysa4|Os01g56280.1,Orysa4|Os11g43060.1  
AT1G49920 Orysa4|Os11g10210.1  
AT2G25010 Orysa4|Os04g48300.1  
Orysa4|Os01g23430.1  
Orysa4|Os09g22400.1,Orysa4|Os01g07350.1,Orysa4|Os06g25570.1,Orysa4|Os06g12640.1  
Orysa4|Os02g13740.1,Orysa4|Os06g14850.1,Orysa4|Os10g21760.1,Orysa4|Os01g40910.1,Orysa4|Os01g57190.1  
Orysa4|Os04g24274.1,Orysa4|Os02g13500.1,Orysa4|Os05g06880.1,Orysa4|Os12g31940.1  
Orysa4|Os05g42030.1  
Orysa4|Os04g04220.1,Orysa4|Os01g74380.1  
Orysa4|Os06g42640.1,Orysa4|Os08g38050.1  
Orysa4|Os11g32850.1  
Orysa4|Os11g40640.1,Orysa4|Os02g45510.1,Orysa4|Os02g46070.1,Orysa4|Os07g46650.1,Orysa4|Os10g30630.1,Orysa4|Os06g42230.1,Orysa4|Os08g19180.1  
AT1G64260 Orysa4|Os01g26856.1,Orysa4|Os01g26980.1,Orysa4|Os09g22380.1,Orysa4|Os04g11910.1,Orysa4|Os02g34550.1,Orysa4|Os09g01870.1,Orysa4|Os06g45030.1,Orysa4|Os05g13800.1,Orysa4|Os03g31660.1,Orysa4|Os01g23420.1,Orysa4|Os01g31790.1,Orysa4|Os11g30390.1,Orysa4|Os03g41500.1  
Orysa4|Os06g23220.1,Orysa4|Os07g32412.1,Orysa4|Os01g59540.1,Orysa4|Os07g32406.1  
Orysa4|Os07g36970.1  
Orysa4|Os02g24290.1,Orysa4|Os03g31670.1  
Orysa4|Os11g06250.1,Orysa4|Os06g27440.1,Orysa4|Os09g11810.1,Orysa4|Os07g13480.1  
Orysa4|Os08g25350.1,Orysa4|Os06g05810.1  
AT1G17930 Orysa4|Os08g24960.1  
Orysa4|Os09g16530.1,Orysa4|Os12g19460.1,Orysa4|Os02g56390.1,Orysa4|Os02g04910.1,Orysa4|Os12g30050.1,Orysa4|Os06g21610.1,Orysa4|Os01g21190.1,Orysa4|Os01g73930.1,Orysa4|Os12g38500.1,Orysa4|Os11g30170.1  
Orysa4|Os07g44980.1,Orysa4|Os03g41480.1  
Orysa4|Os05g28120.1,Orysa4|Os05g40600.1,Orysa4|Os02g02610.1,Orysa4|Os04g29600.1,Orysa4|Os07g05140.1,Orysa4|Os03g32650.1,Orysa4|Os01g62710.1,Orysa4|Os10g27240.1,Orysa4|Os01g67990.1,Orysa4|Os06g22710.1,Orysa4|Os11g12660.1,Orysa4|Os12g06040.1,Orysa4|Os04g38830.1,Orysa4|Os11g46290.1,Orysa4|Os10g23190.1,Orysa4|Os10g02520.1,Orysa4|Os02g39900.1,Orysa4|Os03g49540.1,Orysa4|Os02g05100.1,Orysa4|Os02g41720.1,Orysa4|Os09g19860.1,Orysa4|Os08g38040.1,Orysa4|Os06g14840.1,Orysa4|Os01g57120.1,Orysa4|Os04g27320.1,Orysa4|Os02g16050.1,Orysa4|Os08g16440.1,Orysa4|Os09g25870.1,Orysa4|Os07g44240.1,Orysa4|Os05g26010.1,Orysa4|Os02g27520.1,Orysa4|Os02g14280.1,Orysa4|Os01g28140.1,Orysa4|Os11g22190.1,Orysa4|Os01g56250.1,Orysa4|Os05g41560.1,Orysa4|Os01g53320.1,Orysa4|Os06g37890.1,Orysa4|Os10g18140.1,Orysa4|Os06g11570.1,Orysa4|Os06g49540.1,Orysa4|Os11g05220.1,Orysa4|Os01g68430.1,Orysa4|Os04g17770.1,Orysa4|Os08g42120.1,Orysa4|Os11g14510.1,Orysa4|Os01g31900.1,Orysa4|Os11g06380.1,Orysa4|Os09g21680.1,Orysa4|Os02g06000.1  
AT3G62330 Orysa4|Os01g14920.1  
AT3G05440,AT1G09070  
AT4G15740 Orysa4|Os01g70790.1  
Orysa4|Os01g45700.1,Orysa4|Os04g56100.1  
AT4G15755,AT3G16510  
AT3G62780 Orysa4|Os02g31867.1  
Orysa4|Os07g47390.1,Orysa4|Os07g47400.1,Orysa4|Os05g30740.1,Orysa4|Os05g05650.1,Orysa4|Os01g27190.1  
AT3G09500,AT3G55170,AT2G39390,AT5G02610  
Orysa4|Os02g30050.1,Orysa4|Os04g30730.1  
Orysa4|Os06g51530.1  
AT4G20410 Orysa4|Os04g52760.1  
AT1G16560,AT5G62130 Orysa4|Os10g38030.1,Orysa4|Os05g13330.1  
AT2G05840,AT5G35590 Orysa4|Os03g08280.1  
Orysa4|Os07g42260.1  
Orysa4|Os07g41300.1  
Orysa4|Os04g16720.1,Orysa4|Os08g15240.1,Orysa4|Os10g21340.1,Orysa4|Os12g34550.1  
AT3G56790,AT3G55930,AT1G28060 Orysa4|Os09g07500.1  
AT1G65260 Orysa4|Os01g67000.1  
AT1G80050,AT5G11160 Orysa4|Os02g40010.1,Orysa4|Os04g42520.1  
Orysa4|Os07g30150.1

AT1G27450  
AT4G22570,AT4G12440  
Orysa4|Os12g40130.1,Orysa4|Os12g39860.1  
AT3G45140 Orysa4|Os12g37350.1,Orysa4|Os12g37260.1,Orysa4|Os02g10120.1  
AT1G67560  
AT1G17420,AT1G72520 Orysa4|Os03g08220.1  
Orysa4|Os02g19790.1,Orysa4|Os12g37320.1  
Orysa4|Os06g04420.1  
AT3G22400,AT1G55020  
Orysa4|Os03g52860.1,Orysa4|Os03g49350.1,Orysa4|Os03g49260.1,Orysa4|Os03g49380.1,Orysa4|Os11  
g36719.1  
Orysa4|Os08g39850.1,Orysa4|Os08g39840.1  
Orysa4|Os05g23880.1  
Orysa4|Os04g37430.1  
AT1G30540 Orysa4|Os07g05380.1,Orysa4|Os09g04800.1  
AT4G14220  
Orysa4|Os03g57500.1  
AT5G22000 Orysa4|Os11g36430.1  
AT2G01990,AT1G14630 Orysa4|Os08g36380.1,Orysa4|Os02g53280.1  
AT2G44210  
AT5G25960,AT5G25950  
AT2G27320,AT2G38255,AT2G35250,AT5G46820,AT5G46810,AT4G17860,AT5G46200,AT4G17505,AT5G25410,AT5  
G60380,AT5G25415,AT5G11660,AT5G05030,AT5G36770,AT5G36680,Orysa4|Os08g31740.1  
AT2G03930  
AT2G44250  
AT5G18460  
Orysa4|Os11g03810.1,Orysa4|Os11g10920.1  
AT1G10190,AT4G15050,AT4G15056,AT4G15053,AT4G10210,AT4G10220,AT4G23080,AT5G37520,AT2G24950  
AT5G19170,AT3G48230  
Orysa4|Os11g47740.1,Orysa4|Os07g08370.1,Orysa4|Os02g55240.1,Orysa4|Os07g05520.1  
Orysa4|Os06g16640.1,Orysa4|Os01g37000.1,Orysa4|Os01g74160.1,Orysa4|Os01g37020.1  
AT2G17750,AT2G19360  
Orysa4|Os01g26320.1,Orysa4|Os01g26804.1,Orysa4|Os11g11620.1,Orysa4|Os11g11530.1,Orysa4|Os07  
g08240.1,Orysa4|Os12g29370.1,Orysa4|Os01g61800.1,Orysa4|Os12g30640.1,Orysa4|Os06g45920.1,Orysa4|Os07g  
24050.1,Orysa4|Os02g55220.1,Orysa4|Os02g54960.1,Orysa4|Os02g55230.1,Orysa4|Os05g27500.1,Orysa4|Os04g1  
2639.1,Orysa4|Os02g55210.1,Orysa4|Os11g18140.1  
AT4G23390,AT2G20170,AT4G23350,AT4G23360,AT4G23380,AT4G23370  
Orysa4|Os05g26880.1  
AT3G13510,AT1G55360,AT5G56530 Orysa4|Os03g59240.1,Orysa4|Os07g38590.1  
AT1G70550,AT1G23340,AT5G50150,AT1G10750  
Orysa4|Os05g07764.1,Orysa4|Os01g07570.1,Orysa4|Os06g28000.1,Orysa4|Os01g36660.1  
AT2G44240,AT2G44220  
AT2G18630  
AT3G48640,AT3G28270,AT3G57100  
AT4G34330,AT4G34320 Orysa4|Os10g21540.1,Orysa4|Os03g10240.1  
AT5G66670,AT5G66660,AT5G66675  
AT3G49490 Orysa4|Os08g06130.1  
AT5G19855 Orysa4|Os07g38230.1,Orysa4|Os03g59320.1  
AT1G20530  
AT5G54480,AT1G77500,AT1G21740 Orysa4|Os01g72970.1,Orysa4|Os05g35070.1  
AT4G30130,AT2G19090  
AT2G34670  
AT2G17110,AT4G35240 Orysa4|Os02g44900.1,Orysa4|Os04g47480.1  
Orysa4|Os02g07850.1  
Orysa4|Os09g35620.1  
Orysa4|Os09g37520.1,Orysa4|Os08g43730.1  
AT3G44610 Orysa4|Os11g05320.1  
Orysa4|Os09g08420.1  
AT3G45780 Orysa4|Os12g01140.1,Orysa4|Os11g01140.1  
Orysa4|Os02g49310.1  
AT5G47750 Orysa4|Os08g38320.1,Orysa4|Os09g30150.1  
AT3G27580  
AT3G12690,AT1G79250,AT1G16440 Orysa4|Os01g13270.1,Orysa4|Os05g14750.1  
AT5G40030  
AT1G45160  
AT5G55910,AT4G26610  
AT5G58140 Orysa4|Os04g23890.1  
Orysa4|Os12g29580.1  
Orysa4|Os12g05394.1  
Orysa4|Os12g09630.1  
Orysa4|Os05g04710.1  
AT1G53700,AT3G14370 Orysa4|Os03g14840.1  
AT3G25250,AT4G13000 Orysa4|Os02g39090.1,Orysa4|Os04g41160.1  
Orysa4|Os10g41290.1  
AT2G44830 Orysa4|Os02g43740.1,Orysa4|Os04g46180.1  
AT2G26700 Orysa4|Os01g07940.1  
Orysa4|Os02g18430.1  
Orysa4|Os04g33500.1  
AT5G62310 Orysa4|Os12g42660.1  
AT2G36350,AT3G52890,AT5G03640  
AT2G20040  
Orysa4|Os09g17790.1

AT1G51170,AT3G20830 Orysa4|Os09g31210.1,Orysa4|Os08g39460.1  
AT2G34650 Orysa4|Os10g15160.1,Orysa4|Os03g44020.1,Orysa4|Os12g42020.1  
AT3G17850,AT1G48490  
AT1G06320 Orysa4|Os03g19550.1,Orysa4|Os03g19540.1  
AT5G48430  
Orysa4|Os01g71080.1,Orysa4|Os01g71090.1,Orysa4|Os01g71060.1,Orysa4|Os01g71140.1,Orysa4|Os01  
g71160.1  
AT5G19120  
AT1G03230,AT1G03220  
Orysa4|Os05g33430.1,Orysa4|Os05g33400.1,Orysa4|Os05g33410.1,Orysa4|Os09g25910.1  
AT5G19100,AT5G19110  
Orysa4|Os09g39334.1,Orysa4|Os01g52700.1  
Orysa4|Os03g29360.1,Orysa4|Os07g42220.1,Orysa4|Os06g09900.1,Orysa4|Os03g08250.1  
AT3G22540,AT4G14819 Orysa4|Os03g46300.1  
Orysa4|Os03g06430.1,Orysa4|Os10g28700.1  
AT2G09970,AT1G72510,AT5G20670,AT1G54095  
Orysa4|Os03g53540.1  
AT5G25840,AT1G79770 Orysa4|Os06g36040.1,Orysa4|Os01g10260.1  
Orysa4|Os02g13620.1  
AT2G25780 Orysa4|Os05g11300.1,Orysa4|Os01g10310.1  
Orysa4|Os01g54140.1,Orysa4|Os05g44410.1,Orysa4|Os01g54170.1  
AT1G33940,AT5G18700 Orysa4|Os01g15480.1  
AT1G05950 Orysa4|Os09g33940.1  
Orysa4|Os06g35730.1,Orysa4|Os05g11710.1,Orysa4|Os02g14059.1  
AT5G45775,AT4G18730,AT3G58700,AT2G42740  
AT3G04160 Orysa4|Os04g28170.1  
AT4G31460 Orysa4|Os07g36090.1  
AT3G10110,AT1G18320 Orysa4|Os03g18500.1  
AT2G33793 Orysa4|Os07g10810.1,Orysa4|Os03g62160.1  
AT1G55240,AT1G55230,AT5G19870 Orysa4|Os08g36030.1,Orysa4|Os09g27250.1  
AT1G49470 Orysa4|Os08g36040.1  
Orysa4|Os11g40570.1  
AT3G07790 Orysa4|Os06g30710.1  
AT4G24690  
Orysa4|Os04g40090.1,Orysa4|Os02g38050.1  
AT3G13672  
AT3G58040,AT2G41980  
AT5G37930,AT1G66650,AT1G66630,AT5G62800,AT5G37870  
Orysa4|Os01g03220.1,Orysa4|Os01g03250.1,Orysa4|Os01g03400.1  
Orysa4|Os06g20610.1  
Orysa4|Os02g03620.1  
Orysa4|Os01g03170.1,Orysa4|Os01g03190.1,Orysa4|Os01g03210.1,Orysa4|Os01g03290.1,Orysa4|Os01  
g03300.1  
Orysa4|Os07g46560.1,Orysa4|Os03g24040.1  
Orysa4|Os01g03420.1  
AT3G61790,AT4G27880,AT5G53360 Orysa4|Os02g19140.1  
Orysa4|Os05g14860.1,Orysa4|Os01g13370.1  
AT3G61530,AT2G46110  
Orysa4|Os01g12570.1,Orysa4|Os01g12560.1  
AT3G10210 Orysa4|Os01g71980.1  
AT4G35750 Orysa4|Os02g44820.1,Orysa4|Os04g47330.1  
AT1G14250,AT1G14240,AT1G14230,AT2G02970 Orysa4|Os08g33850.1,Orysa4|Os03g26080.1  
AT5G19490  
AT3G12480 Orysa4|Os05g41450.1,Orysa4|Os11g34200.1  
AT5G62950,AT3G28956 Orysa4|Os12g30510.1  
Orysa4|Os06g20354.1  
AT4G16720,AT4G17390  
Orysa4|Os05g19370.1  
AT5G63830 Orysa4|Os10g37640.1  
AT5G10920 Orysa4|Os03g19280.1  
AT1G11760 Orysa4|Os10g40070.1  
Orysa4|Os02g10400.1,Orysa4|Os03g10080.1  
AT3G59670,AT3G50040 Orysa4|Os01g21460.1,Orysa4|Os05g30210.1,Orysa4|Os05g30340.1  
AT1G20680,AT1G20740  
AT4G38260 Orysa4|Os04g47680.1,Orysa4|Os09g15480.1  
AT5G54600 Orysa4|Os06g46930.1  
AT5G63220 Orysa4|Os01g07100.1  
AT5G16200,AT1G66890,AT1G68430 Orysa4|Os08g27100.1  
AT5G21430 Orysa4|Os12g31460.1  
Orysa4|Os09g33520.1,Orysa4|Os08g42420.1  
AT3G26890,AT5G41110  
AT4G00231 Orysa4|Os03g02720.1  
AT4G38510 Orysa4|Os06g37180.1,Orysa4|Os01g51380.1  
AT1G20260,AT1G76030  
AT4G37020 Orysa4|Os10g25000.1  
AT5G41270 Orysa4|Os01g34660.1,Orysa4|Os01g35990.1  
AT5G64150  
Orysa4|Os12g41830.1  
AT1G11320 Orysa4|Os04g33620.1,Orysa4|Os10g30210.1,Orysa4|Os06g50850.1  
AT2G20790 Orysa4|Os12g34370.1  
Orysa4|Os02g54880.1,Orysa4|Os07g42910.1  
AT1G22450,AT4G28060,AT5G57815 Orysa4|Os04g42060.1,Orysa4|Os03g27290.1



AT1G32710  
AT3G14140,AT3G14160 Orysa4|Os03g60190.1  
AT5G01780  
AT5G37475,AT1G66070 Orysa4|Os02g02990.1  
Orysa4|Os05g41630.1  
AT2G44870 Orysa4|Os10g41940.1  
AT4G39850 Orysa4|Os01g73530.1,Orysa4|Os05g01700.1  
AT3G15160 Orysa4|Os04g53530.1  
Orysa4|Os02g04650.1,Orysa4|Os06g49030.1  
AT5G58110  
Orysa4|Os04g35750.1  
AT1G43790 Orysa4|Os03g55014.1  
AT3G29570  
AT1G22420  
AT1G12810 Orysa4|Os08g42450.1  
AT2G15880,AT4G33970,AT3G19020,AT1G49490 Orysa4|Os01g25460.1  
Orysa4|Os03g54050.1  
AT1G79480,AT3G22070,AT3G50570,AT3G50580  
Orysa4|Os10g04280.1  
AT1G23040,AT1G70990,AT1G02405  
AT1G15825  
AT4G15160,AT3G22120 Orysa4|Os06g07220.1  
AT5G57070,AT3G43583  
AT2G27390  
Orysa4|Os09g13770.1  
Orysa4|Os06g20070.1,Orysa4|Os04g34150.1  
Orysa4|Os08g16720.1  
Orysa4|Os01g67390.1  
AT1G62440,AT1G12040,AT3G22800,AT3G24480,AT4G13340,AT4G18670,AT5G25550  
Orysa4|Os05g08770.1,Orysa4|Os01g08470.1,Orysa4|Os01g41120.1,Orysa4|Os03g58110.1,Orysa4|Os07  
g07990.1,Orysa4|Os03g43650.1  
Orysa4|Os10g11370.1  
AT1G49750,AT3G19320  
AT4G06744 Orysa4|Os04g57430.1,Orysa4|Os04g42620.1  
AT1G54215,AT1G72600  
AT1G61080 Orysa4|Os07g39390.1  
Orysa4|Os11g06150.1  
AT4G16980  
Orysa4|Os02g48170.1  
AT1G72790 Orysa4|Os07g37360.1  
Orysa4|Os04g53730.1  
AT4G28380 Orysa4|Os11g43640.1,Orysa4|Os12g35710.1  
AT4G22470  
AT4G00890 Orysa4|Os11g05870.1  
AT4G27850 Orysa4|Os09g14614.1  
AT5G48920  
AT5G14920  
AT5G55750 Orysa4|Os04g31620.1  
AT1G56530 Orysa4|Os12g06820.1  
AT3G19070  
AT5G17340  
Orysa4|Os05g02630.1,Orysa4|Os05g29870.1,Orysa4|Os05g30470.1  
Orysa4|Os06g41290.1,Orysa4|Os04g56630.1,Orysa4|Os06g21120.1,Orysa4|Os04g34910.1  
Orysa4|Os10g19200.1,Orysa4|Os11g02010.1  
AT5G11990  
Orysa4|Os06g49100.1,Orysa4|Os02g04540.1  
AT1G31250  
AT2G28440  
AT4G11430  
AT2G33520  
AT2G43150,AT3G54590,AT3G54580,AT3G28550,AT1G23720,AT4G08400,AT4G08410,AT5G49080,AT5G06630,AT2  
G24980,AT5G06640,AT5G35190,AT4G13390,AT1G21310,AT1G26240,AT1G26250,AT4G08380,AT4G08370,AT1G76  
930,AT5G26070,AT5G26080,AT3G20850,AT5G19800,AT5G19810  
AT5G15780 Orysa4|Os10g13850.1  
Orysa4|Os08g02590.1  
AT5G59170,AT2G27380,AT4G38770  
Orysa4|Os05g13900.1,Orysa4|Os05g13940.1,Orysa4|Os05g13850.1,Orysa4|Os07g23660.1,Orysa4|Os07  
g23640.1,Orysa4|Os04g34170.1  
Orysa4|Os07g40850.1,Orysa4|Os07g40900.1  
Orysa4|Os01g40190.1  
Orysa4|Os01g41170.1  
Orysa4|Os08g23170.1,Orysa4|Os11g33030.1,Orysa4|Os01g42200.1,Orysa4|Os01g02150.1  
AT5G43770 Orysa4|Os03g58180.1  
Orysa4|Os02g37200.1  
AT5G08720 Orysa4|Os03g62170.1  
AT1G52260,AT3G16110 Orysa4|Os06g06790.1  
AT5G60640,AT3G54960 Orysa4|Os02g01010.1  
AT1G48605,AT3G18030 Orysa4|Os06g09910.1  
AT3G01450,AT3G18530,AT5G14790 Orysa4|Os08g42268.1,Orysa4|Os08g42189.1  
AT4G15830 Orysa4|Os01g70560.1  
AT2G16270,AT1G16630 Orysa4|Os01g56020.1  
Orysa4|Os03g46920.1

AT3G26000  
Orysa4|Os08g33140.1  
AT3G27290 Orysa4|Os04g40910.1  
AT2G01620  
Orysa4|Os11g38949.1,Orysa4|Os03g05980.1  
Orysa4|Os03g26229.1  
AT5G15200,AT5G39850  
AT5G15170 Orysa4|Os07g34598.1  
AT1G26550 Orysa4|Os09g24540.1  
AT2G45320 Orysa4|Os06g37430.1  
AT2G27402,AT2G32180,AT2G32650 Orysa4|Os02g54360.1  
AT1G78620 Orysa4|Os01g52864.1  
AT3G52760,AT2G36300 Orysa4|Os03g17990.1  
AT1G03700,AT4G03540 Orysa4|Os01g13560.1,Orysa4|Os05g15630.1  
AT4G15610,AT3G06390 Orysa4|Os07g26110.1  
AT3G11550,AT5G06200,AT2G36100,AT2G27370  
AT4G25040  
AT5G44550,AT4G20390 Orysa4|Os12g41690.1  
Orysa4|Os08g42430.1,Orysa4|Os01g26120.1  
Orysa4|Os04g58760.1,Orysa4|Os08g01160.1  
AT5G15290 Orysa4|Os02g51010.1,Orysa4|Os06g12500.1,Orysa4|Os04g38690.1  
AT1G14160  
AT5G54980 Orysa4|Os02g12760.1  
AT1G17200,AT3G14380 Orysa4|Os04g21320.1  
AT3G29470,AT2G04135,AT5G33303,AT5G32482,AT4G08056,AT3G30843,AT3G29220  
Orysa4|Os12g16020.1,Orysa4|Os04g18180.1,Orysa4|Os03g30320.1,Orysa4|Os09g10800.1,Orysa4|Os12  
g36360.1,Orysa4|Os10g42590.1  
Orysa4|Os02g22250.1,Orysa4|Os06g29660.1,Orysa4|Os01g25780.1,Orysa4|Os07g11080.1,Orysa4|Os11  
g26590.1,Orysa4|Os07g34930.1,Orysa4|Os01g16570.1,Orysa4|Os03g36980.1,Orysa4|Os05g09250.1,Orysa4|Os02g  
07270.1,Orysa4|Os07g12190.1,Orysa4|Os10g18780.1  
AT3G29265 Orysa4|Os06g14720.1  
AT2G34690  
AT4G39670 Orysa4|Os03g50280.1  
Orysa4|Os03g57140.1  
Orysa4|Os03g31780.1  
AT4G15530 Orysa4|Os05g33570.1,Orysa4|Os03g31750.1  
Orysa4|Os11g48020.1,Orysa4|Os07g01150.1  
AT1G07420,AT2G29390  
AT4G22756,AT4G12110,AT4G22753 Orysa4|Os03g01820.1,Orysa4|Os10g39810.1  
AT1G17160 Orysa4|Os01g47550.1  
Orysa4|Os01g50622.1  
AT1G75380,AT1G19660 Orysa4|Os08g26870.1  
AT5G66050  
AT4G26460,AT3G44860,AT3G44870,AT3G44840,AT1G66690,AT1G66700,AT1G66720,AT5G38100,AT5G38780,AT5  
G37970,AT5G37990,AT1G68040,AT1G15125  
AT4G26420 Orysa4|Os01g15550.1  
AT2G47990 Orysa4|Os07g12320.1  
AT4G02060 Orysa4|Os12g37400.1  
AT2G14050 Orysa4|Os06g11500.1  
AT5G44635  
AT3G09660 Orysa4|Os05g38850.1  
Orysa4|Os05g14590.1  
Orysa4|Os05g08100.1  
AT1G44900 Orysa4|Os11g29380.1  
Orysa4|Os10g20900.1  
AT5G46280 Orysa4|Os05g39850.1  
AT2G07690 Orysa4|Os02g55410.1  
AT2G16440 Orysa4|Os01g36390.1  
Orysa4|Os03g11040.1,Orysa4|Os03g11030.1,Orysa4|Os02g39260.1,Orysa4|Os02g39420.1  
AT5G43080,AT1G47210,AT1G47230,AT1G47220  
Orysa4|Os01g17402.1  
Orysa4|Os12g39210.1  
AT1G16330  
AT1G14750 Orysa4|Os03g12414.1  
AT1G77390  
AT4G35620,AT2G17620  
AT1G34460,AT5G06150,AT3G11520,AT4G37490,AT2G26760 Orysa4|Os01g59120.1,Orysa4|Os05g41390.1  
Orysa4|Os05g42200.1  
AT5G11300,AT5G25380,AT1G80370,AT1G15570 Orysa4|Os12g31810.1  
AT1G20590,AT1G20610,AT1G76310 Orysa4|Os04g47580.1,Orysa4|Os06g51110.1  
AT1G44110,Orysa4|Os12g20324.1,Orysa4|Os01g13260.1,Orysa4|Os01g13229.1,Orysa4|Os05g14730.1  
AT2G01310  
AT5G15880 Orysa4|Os09g02130.1  
AT3G13980,AT1G54200,AT5G12050,AT3G42800  
Orysa4|Os10g25810.1,Orysa4|Os03g07920.1,Orysa4|Os02g53660.1,Orysa4|Os09g27160.1  
AT1G73970 Orysa4|Os02g03090.1  
AT4G05420,AT4G21100 Orysa4|Os05g51480.1  
Orysa4|Os01g40320.1  
Orysa4|Os03g24910.1  
AT3G50620,AT4G34420,AT2G15730 Orysa4|Os03g27760.1  
AT1G70200 Orysa4|Os02g22070.1  
AT2G46000 Orysa4|Os03g05450.1

AT1G79070 Orysa4|Os08g03590.1  
AT3G07020  
AT1G43620 Orysa4|Os01g64750.1  
Orysa4|Os07g23740.1  
Orysa4|Os04g04240.1,Orysa4|Os04g04254.1,Orysa4|Os07g23750.1  
AT4G15010 Orysa4|Os04g44540.1  
AT1G21600 Orysa4|Os12g01950.1,Orysa4|Os11g01890.1  
AT2G16710,AT2G36260 Orysa4|Os12g30030.1  
Orysa4|Os01g01610.1  
AT3G49290,AT5G24310,AT5G42030  
Orysa4|Os01g55560.1  
Orysa4|Os01g13530.1  
Orysa4|Os01g37110.1  
Orysa4|Os04g41570.1  
Orysa4|Os01g57580.1,Orysa4|Os05g42180.1,Orysa4|Os08g08160.1,Orysa4|Os04g53990.1  
AT1G27660 Orysa4|Os01g01600.1  
Orysa4|Os02g17680.1  
Orysa4|Os04g47810.1  
Orysa4|Os01g13000.1,Orysa4|Os05g14010.1  
AT1G05710,AT2G31730 Orysa4|Os03g55220.1  
AT1G31050 Orysa4|Os02g45010.1  
AT1G49830,AT3G19500  
AT2G20100,AT4G29100  
Orysa4|Os03g17130.1  
AT3G20640,AT1G61660  
AT4G05170,AT4G21340  
AT3G15760,AT1G52565 Orysa4|Os06g40210.1  
AT1G13810  
AT1G67660 Orysa4|Os08g13890.1,Orysa4|Os04g40900.1  
Orysa4|Os08g33680.1  
Orysa4|Os10g26700.1  
AT1G18720,AT1G74440 Orysa4|Os02g36870.1  
AT3G15395 Orysa4|Os02g10370.1  
AT5G24860,AT5G10625,AT4G31380  
Orysa4|Os04g21350.1,Orysa4|Os02g26210.1  
Orysa4|Os01g15340.1,Orysa4|Os01g70730.1,Orysa4|Os03g22510.1  
AT5G62820,AT2G36330,AT5G40300 Orysa4|Os01g45360.1,Orysa4|Os01g47200.1,Orysa4|Os02g04180.1  
AT3G07210 Orysa4|Os08g41700.1,Orysa4|Os01g68830.1  
AT1G23440  
AT1G56700 Orysa4|Os07g44610.1,Orysa4|Os09g23280.1,Orysa4|Os03g25270.1  
Orysa4|Os04g44580.1  
Orysa4|Os01g04590.1  
Orysa4|Os02g58100.1  
AT5G49220,AT1G15030,AT2G01260 Orysa4|Os03g61580.1,Orysa4|Os07g14310.1,Orysa4|Os01g20120.1  
AT5G08360,AT5G23380  
AT1G73210,AT1G17830,AT1G03610,AT4G03420,AT4G28150 Orysa4|Os10g35150.1  
AT4G16100 Orysa4|Os01g33000.1  
AT2G40320,AT3G11030 Orysa4|Os03g60350.1  
AT1G73140  
Orysa4|Os03g60300.1  
AT2G42570,AT2G34070,AT1G29050  
AT3G28150 Orysa4|Os06g12810.1,Orysa4|Os06g12820.1  
Orysa4|Os05g51020.1,Orysa4|Os01g42810.1  
AT5G01360 Orysa4|Os03g18120.1  
AT4G25360,AT5G51640 Orysa4|Os01g68630.1  
AT5G20680  
AT1G78710  
AT1G60790 Orysa4|Os04g42900.1  
Orysa4|Os01g30970.1  
Orysa4|Os03g26500.1  
AT2G38320 Orysa4|Os11g01570.1,Orysa4|Os12g01560.1  
AT2G31110 Orysa4|Os01g66340.1,Orysa4|Os06g12830.1  
AT1G48880 Orysa4|Os05g35190.1,Orysa4|Os01g65800.1  
Orysa4|Os05g28830.1  
AT1G70230 Orysa4|Os09g20850.1,Orysa4|Os06g12870.1  
AT5G06700,AT3G12060  
Orysa4|Os02g53380.1  
Orysa4|Os12g33194.1,Orysa4|Os12g36750.1,Orysa4|Os11g13800.1  
Orysa4|Os06g12860.1,Orysa4|Os06g12850.1,Orysa4|Os06g12840.1,Orysa4|Os07g15230.1  
Orysa4|Os04g58340.1,Orysa4|Os01g46680.1  
Orysa4|Os07g46230.1  
AT2G31120  
AT3G54260  
AT3G06080,AT5G19160 Orysa4|Os11g05080.1,Orysa4|Os12g05080.1  
Orysa4|Os01g46410.1,Orysa4|Os01g46400.1,Orysa4|Os06g16200.1,Orysa4|Os06g16170.1,Orysa4|Os06g16150.1,Orysa4|Os06g16160.1,Orysa4|Os02g49660.1,Orysa4|Os06g16250.1,Orysa4|Os02g49650.1  
AT2G40150,AT3G55990,AT2G40160  
Orysa4|Os07g49280.1,Orysa4|Os03g18140.1,Orysa4|Os05g28630.1,Orysa4|Os11g01370.1,Orysa4|Os12g01380.1  
AT3G02440,AT5G15900,AT5G15890  
AT5G64480 Orysa4|Os02g05530.1  
AT3G14850

AT5G40180  
AT5G49340  
AT5G58600,AT2G30010 Orysa4|Os03g18110.1  
AT3G11570,AT5G06230  
Orysa4|Os06g10560.1  
AT5G20590 Orysa4|Os06g44900.1  
AT3G62390 Orysa4|Os03g19470.1  
AT5G64470 Orysa4|Os02g02580.1  
AT4G11090,AT4G23790,AT4G01080,AT1G01430 Orysa4|Os05g12380.1,Orysa4|Os06g33330.1  
AT2G37720,AT5G64020 Orysa4|Os09g23360.1  
Orysa4|Os01g46350.1  
AT2G14530 Orysa4|Os07g31550.1  
Orysa4|Os06g15560.1  
Orysa4|Os06g34060.1,Orysa4|Os01g11810.1  
AT2G30900  
AT5G01620  
AT5G04010 Orysa4|Os01g58670.1  
AT5G23330,AT5G08340 Orysa4|Os03g58710.1  
AT2G17880,AT4G36040 Orysa4|Os08g43490.1  
AT3G17830  
AT2G22360,AT4G39960 Orysa4|Os05g26914.1,Orysa4|Os05g26902.1  
AT1G28210  
Orysa4|Os01g17030.1  
AT5G59610  
AT3G13310  
AT5G48030 Orysa4|Os06g02620.1  
AT4G09350 Orysa4|Os11g10990.1  
AT5G18140  
Orysa4|Os12g07060.1  
AT1G80030 Orysa4|Os02g56040.1  
AT1G25540 Orysa4|Os09g13610.1  
AT5G11560 Orysa4|Os05g14170.1  
AT5G58240 Orysa4|Os12g02730.1,Orysa4|Os11g02760.1  
AT2G47930,AT5G18690,AT3G06360 Orysa4|Os01g71170.1  
AT1G65560 Orysa4|Os01g66720.1  
AT5G37960 Orysa4|Os12g12550.1  
Orysa4|Os06g40070.1  
Orysa4|Os01g66740.1  
AT5G17000,AT5G16970,AT5G16990,AT5G16980,AT3G03080,AT1G26320,AT5G37940,AT5G38000,AT5G37980,AT5G16960,AT3G59845  
Orysa4|Os12g12580.1,Orysa4|Os12g12560.1,Orysa4|Os12g12590.1,Orysa4|Os12g12514.1,Orysa4|Os11g14910.1,Orysa4|Os04g41960.1  
AT5G16210 Orysa4|Os01g33060.1  
AT1G55535,AT3G13420  
Orysa4|Os07g12220.1  
Orysa4|Os12g14939.1  
AT5G38360 Orysa4|Os04g31240.1  
AT1G18800,AT1G74560 Orysa4|Os02g36710.1  
AT2G35480,AT1G32260 Orysa4|Os02g03560.1  
AT1G55590 Orysa4|Os08g39060.1  
AT2G17020  
AT5G05480 Orysa4|Os05g32820.1  
AT3G14920  
Orysa4|Os01g10920.1,Orysa4|Os01g10930.1,Orysa4|Os01g11010.1,Orysa4|Os01g10960.1,Orysa4|Os01g10950.1  
AT5G52180 Orysa4|Os06g03820.1  
AT3G21180  
AT2G41560,AT3G57330 Orysa4|Os11g04460.1,Orysa4|Os12g04220.1,Orysa4|Os05g41580.1  
AT1G27770  
AT5G53010  
AT3G63380,AT3G22910  
AT1G07810,AT1G07670 Orysa4|Os05g02940.1,Orysa4|Os03g17310.1  
AT4G00900  
Orysa4|Os03g42020.1,Orysa4|Os12g39660.1  
Orysa4|Os08g40530.1  
AT2G22950,AT4G37640 Orysa4|Os03g10640.1  
AT1G10130 Orysa4|Os03g52090.1  
AT5G57110,AT4G29900 Orysa4|Os04g51610.1,Orysa4|Os02g08010.1  
AT3G05090 Orysa4|Os12g06810.1  
AT5G14220 Orysa4|Os04g41260.1  
AT3G10050 Orysa4|Os03g50510.1  
AT2G27270 Orysa4|Os01g64480.1,Orysa4|Os12g06220.1  
Orysa4|Os01g12500.1,Orysa4|Os02g01060.1  
AT4G01410 Orysa4|Os09g36210.1,Orysa4|Os05g30490.1  
AT5G22870 Orysa4|Os10g39970.1,Orysa4|Os02g44670.1  
AT5G53730  
AT4G09590,AT2G35970,AT2G35960,AT3G52470,AT3G11660,AT5G06330,AT5G05657,AT5G22200,AT3G44220  
Orysa4|Os11g05860.1,Orysa4|Os12g06260.1,Orysa4|Os02g33550.1,Orysa4|Os04g33990.1,Orysa4|Os08g01220.1,Orysa4|Os04g58860.1  
Orysa4|Os03g33090.1,Orysa4|Os07g40000.1  
AT1G68510 Orysa4|Os01g32770.1  
Orysa4|Os01g20800.1,Orysa4|Os03g41330.1

AT5G67420,AT3G49940  
AT4G37540 Orysa4|Os01g03890.1  
AT1G67100,AT3G02550  
AT1G43710 Orysa4|Os04g04640.1,Orysa4|Os10g01640.1,Orysa4|Os02g20729.1,Orysa4|Os06g26170.1,Orysa4|Os02g33710.1  
AT2G22270,AT4G39860  
Orysa4|Os02g36500.1,Orysa4|Os04g38310.1  
AT1G78150,AT1G35780 Orysa4|Os03g27010.1,Orysa4|Os07g43070.1  
AT5G62550 Orysa4|Os06g38960.1  
Orysa4|Os03g17960.1  
AT3G59710 Orysa4|Os02g39490.1  
Orysa4|Os04g45000.1,Orysa4|Os04g44950.1,Orysa4|Os04g44980.1,Orysa4|Os04g44920.1,Orysa4|Os02g42810.1,Orysa4|Os02g42790.1  
Orysa4|Os07g48640.1  
AT2G24190,AT3G61220,AT1G01800  
AT5G51030,AT5G61830  
AT4G14520,AT4G14660,AT3G22900 Orysa4|Os05g06490.1  
Orysa4|Os03g64350.1  
AT1G17850  
AT4G36890,AT5G67230 Orysa4|Os01g05400.1  
AT4G15475  
Orysa4|Os11g16280.1  
Orysa4|Os02g42412.1  
AT2G25490,AT5G25350 Orysa4|Os06g40360.1,Orysa4|Os02g10700.1  
AT4G01290 Orysa4|Os06g01680.1  
AT4G30260,AT2G18840 Orysa4|Os01g64760.1  
AT5G16870,AT3G03010  
Orysa4|Os04g55860.1  
AT4G32900  
Orysa4|Os05g44390.1  
AT1G05820,AT2G43070  
Orysa4|Os01g68620.1  
AT1G63690,AT1G01650 Orysa4|Os06g51430.1,Orysa4|Os02g57710.1  
Orysa4|Os11g24540.1  
AT5G05350,AT3G10980 Orysa4|Os05g39730.1  
Orysa4|Os11g01850.1,Orysa4|Os01g61060.1,Orysa4|Os05g27570.1,Orysa4|Os12g01890.1,Orysa4|Os11g01842.1,Orysa4|Os02g47460.1  
AT3G03070 Orysa4|Os08g06430.1  
AT4G12540 Orysa4|Os05g45580.1  
Orysa4|Os06g06910.1  
AT3G55350 Orysa4|Os11g47650.1,Orysa4|Os01g62160.1  
AT3G63270 Orysa4|Os07g07880.1  
AT5G53650 Orysa4|Os01g40650.1,Orysa4|Os05g45910.1  
AT3G14860  
AT5G14890  
AT1G70280,AT1G23880 Orysa4|Os02g49770.1,Orysa4|Os06g15820.1  
AT1G23890 Orysa4|Os08g31970.1  
AT2G39950 Orysa4|Os07g01060.1  
AT3G15630,AT1G52720 Orysa4|Os05g09700.1,Orysa4|Os05g08420.1  
AT5G47480,AT5G47490 Orysa4|Os06g01650.1,Orysa4|Os02g01490.1  
AT5G62840 Orysa4|Os01g47190.1  
AT3G44160,AT3G48620 Orysa4|Os05g43470.1  
AT5G19620 Orysa4|Os02g10260.1  
AT4G02110 Orysa4|Os07g49010.1,Orysa4|Os03g19190.1  
AT4G35970  
Orysa4|Os04g14680.1  
AT4G32320  
Orysa4|Os04g35520.1,Orysa4|Os02g34810.1  
AT1G77490 Orysa4|Os12g07820.1,Orysa4|Os12g07830.1  
AT4G35000 Orysa4|Os08g43560.1,Orysa4|Os09g36750.1  
AT4G08390  
AT1G33660  
AT3G09640 Orysa4|Os07g49400.1,Orysa4|Os03g17690.1  
Orysa4|Os08g41090.1  
AT1G07890  
AT4G04670 Orysa4|Os07g33100.1  
AT5G53150  
AT5G37760 Orysa4|Os05g28440.1  
AT5G62780,AT4G19570,AT5G37750,AT5G37440,AT4G19590,AT4G19580  
AT3G04960,AT4G27980,AT3G05110  
AT2G01710 Orysa4|Os08g37270.1,Orysa4|Os09g28890.1  
Orysa4|Os12g44260.1,Orysa4|Os11g36530.1  
AT2G25560 Orysa4|Os04g31940.1,Orysa4|Os03g28310.1  
Orysa4|Os10g03610.1,Orysa4|Os03g36160.1,Orysa4|Os03g62140.1,Orysa4|Os03g62130.1,Orysa4|Os03g62150.1  
AT2G05230,AT2G05250,AT5G35753  
AT5G37380  
AT5G50115 Orysa4|Os01g69930.1  
Orysa4|Os03g61550.1  
AT2G35540 Orysa4|Os06g02170.1

AT3G04980,AT5G27240 Orysa4|Os01g70250.1  
AT5G18750,AT3G06340 Orysa4|Os01g27740.1,Orysa4|Os06g34440.1  
AT1G09260  
AT1G47660 Orysa4|Os03g37878.1,Orysa4|Os01g07660.1,Orysa4|Os07g01120.1  
Orysa4|Os03g42654.1  
AT4G40090 Orysa4|Os03g24560.1  
AT1G70590 Orysa4|Os04g40030.1  
AT1G80290 Orysa4|Os08g40920.1  
AT4G35540 Orysa4|Os08g42020.1  
AT2G16800,AT4G35080 Orysa4|Os06g02580.1  
AT5G37580,AT5G37590 Orysa4|Os04g20960.1  
AT5G50190,AT4G30090  
AT4G31340,AT2G24420 Orysa4|Os08g40790.1,Orysa4|Os09g32250.1  
Orysa4|Os01g55950.1  
AT4G37550,AT4G37560  
Orysa4|Os05g29010.1  
AT5G41880  
Orysa4|Os01g41610.1  
AT2G19680,AT4G29480,AT4G26210 Orysa4|Os01g52200.1,Orysa4|Os05g45740.1  
AT1G48635,AT3G18160 Orysa4|Os09g14510.1  
AT2G46580 Orysa4|Os03g02450.1  
Orysa4|Os09g23890.1  
AT3G20650 Orysa4|Os08g08200.1  
AT5G13420 Orysa4|Os01g70170.1  
AT1G48050 Orysa4|Os03g63920.1  
Orysa4|Os05g44310.1  
AT4G04910  
AT3G53500,AT2G37340 Orysa4|Os01g06290.1,Orysa4|Os05g02880.1,Orysa4|Os05g07000.1  
AT3G56330 Orysa4|Os05g25880.1,Orysa4|Os05g25870.1  
AT3G27130 Orysa4|Os12g25720.1  
AT3G11920  
AT4G08550 Orysa4|Os06g12030.1  
Orysa4|Os10g34170.1  
AT4G17760 Orysa4|Os06g04190.1  
Orysa4|Os05g03884.1,Orysa4|Os01g19694.1  
AT1G23380,AT1G70510  
Orysa4|Os03g51710.1  
Orysa4|Os03g47042.1,Orysa4|Os03g47022.1  
AT4G08150 Orysa4|Os03g51690.1  
AT1G62360 Orysa4|Os03g56140.1,Orysa4|Os03g56110.1,Orysa4|Os07g03770.1  
Orysa4|Os03g13840.1  
AT4G15450,AT3G21600,AT3G21590 Orysa4|Os01g52480.1  
AT4G35985,AT2G17840,AT3G51250 Orysa4|Os06g50330.1  
Orysa4|Os01g58610.1,Orysa4|Os05g41640.1  
AT1G79550 Orysa4|Os02g07260.1,Orysa4|Os06g45710.1  
AT1G56190,AT3G12780  
Orysa4|Os10g30550.1  
AT5G14060,AT3G02020,AT5G13280 Orysa4|Os01g70300.1,Orysa4|Os07g20544.1  
AT1G08500 Orysa4|Os01g17470.1  
Orysa4|Os12g26880.1,Orysa4|Os11g29910.1  
AT1G49710,AT3G19280 Orysa4|Os08g36840.1  
AT3G07750 Orysa4|Os12g21500.1  
Orysa4|Os05g22800.1  
AT3G01270,AT5G15110  
AT3G53190,AT5G04310,AT3G54920 Orysa4|Os10g31910.1  
AT4G13210,AT3G24670,AT5G48900,AT3G07010 Orysa4|Os04g05050.1  
Orysa4|Os06g38520.1,Orysa4|Os06g38510.1,Orysa4|Os02g12300.1  
Orysa4|Os08g25420.1  
AT4G13710,AT1G04680,AT3G24230  
AT5G09280 Orysa4|Os08g18980.1,Orysa4|Os08g18970.1  
AT4G24780,AT5G63180,AT1G67750,AT3G27400  
Orysa4|Os01g36620.1  
Orysa4|Os01g62000.1  
AT5G55720  
AT3G55140,AT3G09540  
AT2G02720,AT1G14420 Orysa4|Os06g05272.1,Orysa4|Os06g05209.1,Orysa4|Os06g05260.1  
AT1G30350,AT1G11920,AT4G22080,AT4G22090  
AT4G03820,AT4G22270,AT1G50630,AT3G20300 Orysa4|Os04g37520.1,Orysa4|Os06g42850.1  
AT2G21080 Orysa4|Os08g41000.1  
AT1G67570 Orysa4|Os08g03430.1  
AT2G17790,AT3G51310 Orysa4|Os03g58700.1  
AT1G75850  
AT2G40290,AT5G05470 Orysa4|Os07g49220.1,Orysa4|Os03g18510.1  
AT5G19150 Orysa4|Os11g17610.1  
AT1G08750 Orysa4|Os02g12740.1  
AT5G49950,AT1G34340 Orysa4|Os05g35730.1,Orysa4|Os01g65070.1  
AT3G50790 Orysa4|Os02g43340.1  
AT3G55070 Orysa4|Os05g06760.1  
AT2G20515 Orysa4|Os04g43670.1  
Orysa4|Os12g13590.1  
AT5G12370  
AT4G11385

Orysa4|Os10g41670.1,Orysa4|Os02g06780.1,Orysa4|Os07g36580.1,Orysa4|Os11g06030.1,Orysa4|Os05g38870.1,Orysa4|Os02g33220.1,Orysa4|Os02g30330.1  
AT5G49320 Orysa4|Os01g14960.1  
AT3G57320 Orysa4|Os07g46710.1  
Orysa4|Os04g23180.1  
AT1G51610  
AT5G04480 Orysa4|Os10g39900.1  
AT4G01210 Orysa4|Os01g43380.1  
AT3G07420 Orysa4|Os12g22600.1  
AT1G68420,AT5G38750  
AT5G56680,AT1G70980 Orysa4|Os01g27520.1  
AT4G17300 Orysa4|Os07g30200.1  
AT3G23700 Orysa4|Os03g62780.1  
AT1G79810 Orysa4|Os05g19480.1  
AT4G32690 Orysa4|Os06g39140.1  
AT5G40530 Orysa4|Os02g38060.1  
Orysa4|Os03g57920.1,Orysa4|Os03g57900.1  
AT2G36320,AT3G52800,AT2G27580  
AT4G25380  
Orysa4|Os07g07350.1,Orysa4|Os03g57890.1  
AT1G51200  
Orysa4|Os05g23470.1  
Orysa4|Os06g41010.1  
AT4G12040,AT4G22820,AT1G12440,AT4G14225  
Orysa4|Os01g56040.1,Orysa4|Os02g32840.1,Orysa4|Os01g51990.1,Orysa4|Os01g52030.1,Orysa4|Os07g07370.1,Orysa4|Os07g07400.1,Orysa4|Os08g33880.1  
AT3G12630 Orysa4|Os08g39450.1,Orysa4|Os09g31200.1  
AT2G46540 Orysa4|Os05g46450.1  
AT3G27460,AT5G40550 Orysa4|Os12g19350.1  
AT3G03420 Orysa4|Os04g40650.1,Orysa4|Os12g19090.1  
AT4G11190,AT4G11210,AT4G11180,AT4G23690,AT1G64160  
Orysa4|Os07g44260.1,Orysa4|Os07g44370.1,Orysa4|Os07g44250.1,Orysa4|Os07g44920.1,Orysa4|Os07g44450.1,Orysa4|Os07g44380.1,Orysa4|Os07g44930.1  
AT5G03570,AT2G38460 Orysa4|Os06g36450.1  
AT5G45590 Orysa4|Os10g42860.1  
Orysa4|Os11g24320.1  
Orysa4|Os11g24510.1  
Orysa4|Os11g24340.1  
Orysa4|Os06g32780.1,Orysa4|Os03g52070.1,Orysa4|Os03g52080.1,Orysa4|Os03g52040.1  
Orysa4|Os11g42390.1,Orysa4|Os10g01110.1,Orysa4|Os04g09720.1,Orysa4|Os10g01134.1,Orysa4|Os11g27200.1,Orysa4|Os11g27264.1  
AT3G12240,AT3G12230,AT3G12220,AT3G12203,AT5G36180,AT1G73300,AT1G73280,AT1G73310,AT1G73290,AT1G73270,AT3G10450,AT2G22970,AT2G22920,AT2G22990,AT2G23010,AT2G23000,AT2G22980,AT2G22960,AT1G33540,AT5G09640  
Orysa4|Os11g24180.1  
Orysa4|Os12g39170.1  
Orysa4|Os11g24240.1  
AT4G20300 Orysa4|Os01g48830.1,Orysa4|Os05g48280.1  
AT1G15790  
Orysa4|Os11g35750.1,Orysa4|Os08g45080.1  
AT1G15780,AT1G15770,AT2G10440 Orysa4|Os04g03860.1,Orysa4|Os12g14150.1  
Orysa4|Os12g14140.1  
AT5G60160 Orysa4|Os12g13390.1  
AT5G04710 Orysa4|Os01g73680.1  
AT3G06470,AT3G06460 Orysa4|Os03g49480.1  
AT1G24040 Orysa4|Os04g39140.1  
AT2G37035 Orysa4|Os10g33820.1  
AT4G01140,AT4G23720 Orysa4|Os04g49140.1,Orysa4|Os06g06430.1  
AT3G08600 Orysa4|Os12g02550.1  
Orysa4|Os10g37650.1  
AT4G27750 Orysa4|Os06g03850.1  
AT5G27830 Orysa4|Os02g37940.1  
AT2G24820 Orysa4|Os02g54980.1  
Orysa4|Os09g32520.1,Orysa4|Os09g32532.1,Orysa4|Os08g41300.1,Orysa4|Os09g32500.1  
AT5G46430,AT4G18100  
AT3G23350 Orysa4|Os08g45230.1  
AT3G46540  
AT1G08670 Orysa4|Os01g62370.1  
AT1G76980,AT1G21390 Orysa4|Os11g09350.1  
AT5G49970  
Orysa4|Os10g23120.1  
Orysa4|Os02g08380.1  
AT4G30620,AT2G24020  
AT1G26180 Orysa4|Os02g22060.1  
AT3G13782  
AT5G56950,AT4G26110,AT2G19480 Orysa4|Os01g51450.1,Orysa4|Os06g40920.1  
Orysa4|Os06g05660.1  
AT1G01510 Orysa4|Os03g03460.1,Orysa4|Os10g38900.1  
AT5G44060,AT1G04000,AT3G23440 Orysa4|Os04g43310.1,Orysa4|Os02g40820.1,Orysa4|Os10g33360.1  
Orysa4|Os02g29380.1  
AT5G04560  
AT2G36490

AT4G34060  
AT3G10010 Orysa4|Os01g11900.1  
Orysa4|Os05g37350.1,Orysa4|Os05g37410.1  
AT3G18860 Orysa4|Os07g03160.1  
AT2G34200 Orysa4|Os05g11720.1,Orysa4|Os01g53130.1  
AT5G05830 Orysa4|Os05g37900.1  
AT5G59000  
AT2G37950,AT5G01070  
Orysa4|Os03g23980.1  
AT4G31530  
AT4G15420 Orysa4|Os01g35040.1  
AT5G14710 Orysa4|Os10g25600.1  
AT1G74070 Orysa4|Os01g02080.1  
AT1G20460,AT1G76185 Orysa4|Os03g12630.1  
AT3G55030,AT2G39290 Orysa4|Os03g17520.1  
AT5G58170,AT5G58050 Orysa4|Os02g09450.1  
AT1G66970,AT1G66980,AT4G26690,AT5G55480,AT3G20520  
Orysa4|Os02g37590.1,Orysa4|Os04g39610.1,Orysa4|Os12g27102.1,Orysa4|Os08g39350.1,Orysa4|Os09  
g17000.1  
AT1G09483,AT1G09470,AT3G05830,AT5G26770 Orysa4|Os01g18840.1,Orysa4|Os05g04530.1  
AT2G14045 Orysa4|Os07g08820.1  
AT3G10130 Orysa4|Os02g33020.1  
AT5G49810 Orysa4|Os05g01470.1  
AT5G51170 Orysa4|Os02g43480.1  
AT4G31700,AT5G10360 Orysa4|Os03g27260.1,Orysa4|Os07g42950.1  
AT4G20850 Orysa4|Os02g44520.1  
AT1G28150 Orysa4|Os04g44590.1  
AT5G47560 Orysa4|Os08g39370.1,Orysa4|Os09g31130.1  
AT1G04950  
AT1G54360 Orysa4|Os01g32750.1  
Orysa4|Os04g47700.1  
AT5G05570 Orysa4|Os07g49300.1  
Orysa4|Os06g11420.1  
Orysa4|Os01g54360.1  
Orysa4|Os02g38400.1  
AT1G77180 Orysa4|Os02g52250.1  
AT2G04900 Orysa4|Os03g53980.1  
AT4G33280 Orysa4|Os01g52514.1  
Orysa4|Os01g52540.1  
AT2G39725 Orysa4|Os08g17650.1  
AT5G38050  
AT1G71080 Orysa4|Os01g32300.1  
AT4G14570 Orysa4|Os10g28030.1,Orysa4|Os10g28020.1  
AT5G18070 Orysa4|Os07g09720.1  
AT2G44690  
AT4G35020 Orysa4|Os02g58730.1  
AT2G17800,AT4G35950,AT3G51300  
Orysa4|Os01g12900.1  
AT4G28950 Orysa4|Os05g43820.1  
AT5G45970 Orysa4|Os02g20850.1  
Orysa4|Os02g02840.1  
AT5G62880,AT3G48040 Orysa4|Os02g50860.1,Orysa4|Os06g12790.1  
Orysa4|Os11g19800.1,Orysa4|Os01g35850.1  
AT1G75840,AT1G20090  
AT4G08980 Orysa4|Os02g52130.1,Orysa4|Os06g11630.1,Orysa4|Os04g37590.1  
Orysa4|Os05g19954.1  
AT3G06950  
AT3G52250 Orysa4|Os05g03550.1  
AT2G47920 Orysa4|Os07g47090.1  
AT1G58210,AT1G09720,AT2G22560,AT5G10500  
Orysa4|Os05g39000.1,Orysa4|Os01g61910.1,Orysa4|Os05g02790.1,Orysa4|Os07g49480.1  
AT4G03153,AT1G03470  
AT3G01435 Orysa4|Os02g49640.1,Orysa4|Os02g09600.1  
AT5G13840 Orysa4|Os01g74146.1  
AT4G11920,AT4G22910 Orysa4|Os03g03150.1  
AT4G33270,AT4G33260,AT5G27080,AT5G26900,AT5G27570,AT5G27945  
Orysa4|Os09g06680.1,Orysa4|Os02g47180.1  
AT2G28600 Orysa4|Os12g05230.1  
AT3G07480 Orysa4|Os09g33950.1  
AT5G13390 Orysa4|Os11g32470.1  
AT1G64960 Orysa4|Os03g42040.1  
AT2G37970 Orysa4|Os01g63210.1  
AT4G16440 Orysa4|Os03g53750.1  
Orysa4|Os04g52830.1  
Orysa4|Os05g18280.1,Orysa4|Os11g08830.1  
AT5G60570  
AT1G14330,AT2G02870,AT1G26930,AT1G74510 Orysa4|Os11g38980.1,Orysa4|Os03g07530.1  
AT5G40680,AT3G27150  
AT1G69520  
Orysa4|Os02g51030.1  
AT1G69523,AT1G69526



AT1G23465  
AT3G08980 Orysa4|Os03g05430.1,Orysa4|Os04g08340.1  
AT1G53530 Orysa4|Os11g40500.1  
AT4G31370,AT2G24450,AT3G12660  
AT2G45470,AT3G60900 Orysa4|Os03g03600.1,Orysa4|Os04g48490.1  
AT5G55730,AT4G12730 Orysa4|Os08g23180.1,Orysa4|Os09g07350.1,Orysa4|Os09g30010.1,Orysa4|Os08g38270.1,Orysa4|Os06g17460.1  
Orysa4|Os02g26290.1,Orysa4|Os04g21570.1,Orysa4|Os02g26320.1  
AT3G46550 Orysa4|Os05g38500.1,Orysa4|Os01g62380.1  
Orysa4|Os02g49420.1  
Orysa4|Os02g28130.1,Orysa4|Os06g44660.1  
AT2G43540 Orysa4|Os04g41800.1  
AT2G20950,AT4G38550,AT4G38560,AT2G20960,AT5G11140 Orysa4|Os06g49700.1  
AT3G53970,AT1G48530 Orysa4|Os07g36420.1  
AT4G25433  
AT5G62150 Orysa4|Os10g38040.1,Orysa4|Os04g48380.1  
AT3G52790  
AT3G48880 Orysa4|Os10g35920.1  
AT4G11580,Orysa4|Os03g36439.1  
AT1G74640 Orysa4|Os09g24710.1  
AT2G44280,AT3G60070 Orysa4|Os03g07170.1  
Orysa4|Os07g39010.1  
Orysa4|Os01g61420.1,Orysa4|Os05g39380.1  
AT2G42030,AT3G58030,AT2G44410 Orysa4|Os08g06510.1  
AT1G05590 Orysa4|Os05g32410.1,Orysa4|Os03g11980.1,Orysa4|Os07g38790.1  
AT3G61060,AT1G12710,AT1G63090,AT5G52120 Orysa4|Os04g48270.1,Orysa4|Os09g35680.1,Orysa4|Os02g13160.1,Orysa4|Os03g02550.1  
AT3G53000  
AT3G15640,AT1G52710,AT1G80230 Orysa4|Os01g42650.1,Orysa4|Os06g05080.1  
AT1G02140 Orysa4|Os08g01660.1,Orysa4|Os12g18880.1  
Orysa4|Os11g06900.1,Orysa4|Os12g07150.1  
Orysa4|Os09g16580.1  
AT5G64440 Orysa4|Os04g01250.1  
AT3G58490 Orysa4|Os03g59070.1  
AT5G28615  
AT2G07760,AT5G28823,AT5G32613,AT5G16486,AT1G43760 Orysa4|Os09g09560.1  
AT1G19030,AT5G13655,AT3G17200,AT5G41505,AT3G49280,AT2G15600,AT1G32390,AT1G47783,AT2G03540,AT4G11710,AT1G35570,AT4G05145,AT5G52065,AT2G40680,AT1G21330,AT1G62890,AT5G49090,AT1G54955,AT3G25727,AT2G02520,AT1G43730,AT4G04650,AT4G05095,AT5G18880,AT1G60720,AT1G33710,AT3G25720,AT4G10613  
AT5G46120,AT3G27590,AT5G59060  
AT4G13470,AT1G34440  
AT3G43760,AT1G43570  
AT1G67930 Orysa4|Os05g31490.1  
AT1G09280 Orysa4|Os12g37630.1  
AT3G51880  
AT2G34450 Orysa4|Os01g47600.1  
AT4G35570,AT2G17560  
AT5G23405,AT5G23420 Orysa4|Os06g51220.1  
AT1G20693,AT1G20696  
AT5G05330 Orysa4|Os08g01100.1  
Orysa4|Os04g47690.1,Orysa4|Os02g44930.1  
Orysa4|Os09g37910.1  
Orysa4|Os05g13660.1  
AT3G09680,AT5G02960 Orysa4|Os01g61820.1,Orysa4|Os03g60400.1  
AT4G33590,AT4G33600 Orysa4|Os09g29160.1  
AT5G63070  
AT1G33850,AT5G43640,AT5G09500,AT5G09490,AT1G04270,AT5G09510 Orysa4|Os07g08660.1,Orysa4|Os03g58430.1  
AT2G30410 Orysa4|Os02g57150.1  
AT5G43310 Orysa4|Os07g26440.1,Orysa4|Os03g64320.1  
AT5G13940  
AT3G19340 Orysa4|Os11g32490.1,Orysa4|Os12g29550.1,Orysa4|Os01g70390.1  
AT5G37670  
AT4G27670 Orysa4|Os03g14180.1  
Orysa4|Os02g03570.1  
AT5G12030,AT5G12020 Orysa4|Os01g04340.1  
Orysa4|Os02g10710.1  
AT1G59860,AT1G07400,AT2G29500  
AT3G46230,AT1G53540,AT5G59720 Orysa4|Os03g16020.1,Orysa4|Os03g16030.1,Orysa4|Os03g15960.1,Orysa4|Os03g16040.1  
Orysa4|Os03g61940.1  
AT4G21870 Orysa4|Os07g33350.1  
AT1G52560 Orysa4|Os02g12610.1  
Orysa4|Os01g04350.1  
Orysa4|Os02g48140.1,Orysa4|Os11g13980.1  
AT2G19310

Orysa4|Os01g08860.1  
AT1G54050 Orysa4|Os02g54140.1  
AT4G10250 Orysa4|Os04g36750.1  
Orysa4|Os01g04380.1,Orysa4|Os01g04370.1,Orysa4|Os01g04360.1  
AT5G42160  
AT1G53940,AT5G40990,AT1G53990,AT3G14225,AT1G53920  
AT2G04020  
Orysa4|Os02g50690.1,Orysa4|Os02g44860.1  
AT2G19050,AT2G19060,AT4G30140,AT2G19010  
AT5G41890 Orysa4|Os04g48800.1  
AT2G40250 Orysa4|Os05g39220.1,Orysa4|Os01g61570.1  
Orysa4|Os02g19000.1,Orysa4|Os01g72850.1,Orysa4|Os02g18990.1,Orysa4|Os02g18954.1,Orysa4|Os06  
g50950.1,Orysa4|Os06g50940.1  
AT1G71120  
Orysa4|Os04g55660.1,Orysa4|Os09g39430.1  
AT2G23540,AT3G50400  
Orysa4|Os12g03280.1,Orysa4|Os11g03520.1  
AT1G71691 Orysa4|Os05g34700.1  
AT5G37690 Orysa4|Os02g50000.1,Orysa4|Os06g14630.1  
AT1G23500,AT1G73610,AT5G63170,AT1G75920,AT1G75910,AT1G75930  
AT1G33811 Orysa4|Os12g17570.1  
AT2G03980 Orysa4|Os06g36520.1  
Orysa4|Os03g07070.1  
Orysa4|Os08g02094.1  
AT2G31550,AT2G31540,AT1G58430,AT2G30220,AT2G30310,AT2G24560,AT1G06990,AT5G45960  
Orysa4|Os02g26090.1  
AT4G28780,AT3G04290,AT5G33370,AT5G18430  
Orysa4|Os02g40440.1,Orysa4|Os04g42860.1,Orysa4|Os10g32580.1,Orysa4|Os08g45150.1,Orysa4|Os02  
g57110.1  
AT2G42990,AT4G26790,AT2G04570 Orysa4|Os02g09620.1,Orysa4|Os06g43044.1,Orysa4|Os02g09610.1  
AT5G03810,AT5G03820,AT5G22810,AT3G53100 Orysa4|Os03g47940.1  
Orysa4|Os11g42050.1  
AT5G45950 Orysa4|Os02g01980.1  
Orysa4|Os02g26080.1  
AT3G09930,AT5G03610,AT5G03600  
AT1G74460 Orysa4|Os06g12410.1  
AT5G15720  
Orysa4|Os09g04710.1,Orysa4|Os09g07290.1,Orysa4|Os09g04624.1  
AT3G16370 Orysa4|Os06g05550.1  
AT4G10950 Orysa4|Os02g18870.1  
AT1G71250,AT5G08460  
AT1G29660,AT1G29670,AT5G45670,AT4G18970  
Orysa4|Os01g54470.1,Orysa4|Os05g44200.1,Orysa4|Os01g52770.1  
AT4G16220  
Orysa4|Os01g13680.1  
AT5G55050 Orysa4|Os03g38390.1,Orysa4|Os03g38470.1  
AT1G20130,AT1G20120,AT1G75900,AT1G75880,AT1G75890,AT1G59406,AT1G59030,AT1G58725,AT3G43550,AT3  
G43570,AT1G58480,AT3G14820,AT5G42170  
Orysa4|Os10g30290.1,Orysa4|Os09g36880.1,Orysa4|Os03g64170.1,Orysa4|Os02g01140.1,Orysa4|Os06  
g24404.1,Orysa4|Os10g05088.1  
AT4G16230  
Orysa4|Os03g19670.1  
Orysa4|Os03g38400.1  
Orysa4|Os07g47210.1  
Orysa4|Os04g47390.1,Orysa4|Os02g44850.1  
AT1G54010,AT1G54000,AT1G54020,AT3G14210,AT3G14220,AT1G54030  
AT5G03770 Orysa4|Os01g63840.1  
AT4G31115  
AT5G04440 Orysa4|Os03g05320.1  
AT2G30280 Orysa4|Os12g01940.1  
AT2G44970 Orysa4|Os12g01930.1,Orysa4|Os11g01880.1  
Orysa4|Os05g48416.1  
AT4G11990,AT4G22860,AT5G62240 Orysa4|Os06g03980.1  
Orysa4|Os03g11600.1  
AT1G69180  
AT4G00180,AT2G45190,AT2G26580 Orysa4|Os12g42610.1,Orysa4|Os03g44710.1,Orysa4|Os07g06620.1  
AT1G23420  
AT3G47120  
Orysa4|Os03g61110.1  
AT3G20680 Orysa4|Os05g42100.1  
AT1G31330 Orysa4|Os03g56670.1  
AT5G22620 Orysa4|Os11g05260.1  
Orysa4|Os01g13570.1  
AT3G06550  
AT5G46340,AT1G29890,AT2G34410 Orysa4|Os05g50510.1  
AT3G06547  
Orysa4|Os03g19970.1  
AT2G45950,AT3G61415 Orysa4|Os03g01660.1  
AT5G58040 Orysa4|Os03g51520.1  
AT3G66652 Orysa4|Os03g19570.1  
AT5G44070,AT1G03980 Orysa4|Os05g34290.1,Orysa4|Os06g01260.1  
AT1G79060,AT3G12970,AT1G56020

Orysa4|Os06g46250.1,Orysa4|Os02g06960.1,Orysa4|Os01g53440.1,Orysa4|Os12g41660.1,Orysa4|Os04  
g52800.1  
Orysa4|Os11g01020.1,Orysa4|Os12g01010.1  
Orysa4|Os07g13300.1  
AT5G02530  
AT5G59950 Orysa4|Os03g17010.1  
AT1G66260,AT5G37720 Orysa4|Os08g33120.1,Orysa4|Os06g14470.1  
AT2G42760 Orysa4|Os02g38860.1,Orysa4|Os06g35770.1  
Orysa4|Os01g13930.1  
AT3G21100,AT1G51520,AT1G51530,AT5G12440,AT3G63450,AT3G51950  
Orysa4|Os03g21160.1,Orysa4|Os07g48410.1,Orysa4|Os12g02970.1,Orysa4|Os11g03220.1  
AT2G25570 Orysa4|Os02g10820.1  
Orysa4|Os03g55140.1  
AT1G49910,AT3G19590 Orysa4|Os03g33580.1  
Orysa4|Os07g39950.1  
AT1G69400  
AT1G15850,AT1G80670 Orysa4|Os08g07960.1,Orysa4|Os01g44394.1  
AT5G55140  
Orysa4|Os06g23210.1  
AT1G80460 Orysa4|Os04g55410.1  
AT4G15802 Orysa4|Os06g16270.1  
AT5G58070 Orysa4|Os08g34150.1,Orysa4|Os02g39930.1  
AT3G32090  
Orysa4|Os02g26430.1  
AT5G43290  
AT5G07100  
AT1G69310  
AT4G01250,AT4G23550,AT5G52830  
Orysa4|Os05g50700.1,Orysa4|Os01g43550.1,Orysa4|Os06g30860.1,Orysa4|Os02g16540.1  
AT4G39410  
AT4G26440,AT5G56270 Orysa4|Os09g30400.1,Orysa4|Os08g38990.1  
AT2G23320  
AT2G40740 Orysa4|Os05g25700.1  
AT2G30590,AT3G04670,AT5G28650 Orysa4|Os12g40570.1,Orysa4|Os03g53050.1  
Orysa4|Os02g43560.1  
Orysa4|Os03g45450.1  
AT1G68150  
AT4G30935  
AT1G66600,AT1G66560,AT1G66550,AT1G80590,AT5G22570,AT5G01900,AT3G56400,AT2G40750  
AT5G49520  
AT5G26170  
Orysa4|Os01g60520.1,Orysa4|Os11g45850.1,Orysa4|Os01g60600.1,Orysa4|Os01g60540.1,Orysa4|Os12  
g02420.1,Orysa4|Os11g02480.1,Orysa4|Os03g20550.1,Orysa4|Os11g02470.1,Orysa4|Os12g02400.1,Orysa4|Os01g  
60490.1,Orysa4|Os05g14370.1,Orysa4|Os09g09630.1,Orysa4|Os11g02540.1  
Orysa4|Os09g25070.1  
Orysa4|Os08g13840.1,Orysa4|Os04g51560.1  
AT3G58710  
AT2G44745  
AT2G04880  
AT4G24240  
Orysa4|Os01g47560.1  
Orysa4|Os05g39720.1  
AT2G47260  
AT3G56390  
AT2G38470  
Orysa4|Os01g53040.1  
AT2G37260  
Orysa4|Os01g53260.1  
Orysa4|Os04g46060.1  
AT2G03340,AT1G13960,AT3G01080 Orysa4|Os03g33020.1,Orysa4|Os12g32250.1  
Orysa4|Os01g51690.1,Orysa4|Os05g46020.1,Orysa4|Os05g09020.1,Orysa4|Os01g09100.1,Orysa4|Os01  
g40260.1  
Orysa4|Os06g44010.1  
Orysa4|Os05g03900.1  
Orysa4|Os03g63810.1  
Orysa4|Os01g74140.1  
AT5G13080 Orysa4|Os11g29870.1  
AT5G64810,AT2G21900  
Orysa4|Os05g49100.1  
AT2G46130  
Orysa4|Os04g34800.1,Orysa4|Os07g27670.1,Orysa4|Os04g47510.1,Orysa4|Os01g62510.1,Orysa4|Os05  
g45230.1,Orysa4|Os03g21710.1,Orysa4|Os07g48260.1,Orysa4|Os05g40080.1,Orysa4|Os05g40060.1,Orysa4|Os01g  
60640.1,Orysa4|Os05g25770.1  
Orysa4|Os01g43650.1  
AT2G30250  
AT3G01970  
Orysa4|Os01g40430.1  
AT1G29280 Orysa4|Os01g54600.1  
Orysa4|Os08g17400.1  
AT1G55600  
AT4G11070,AT4G23810  
Orysa4|Os08g29660.1,Orysa4|Os09g16510.1,Orysa4|Os05g49620.1,Orysa4|Os01g46800.1,Orysa4|Os06

g06360.1  
AT5G24110  
AT4G26640 Orysa4|Os07g39480.1  
AT1G80840,AT2G25000,AT4G31800 Orysa4|Os09g25060.1  
Orysa4|Os03g58420.1  
AT1G30650,AT2G34830,AT5G45270 Orysa4|Os04g50920.1,Orysa4|Os02g47060.1  
AT3G62340  
AT1G64000,AT5G41570  
AT2G24570,AT4G31550  
AT2G46400  
AT1G29860,AT5G46350,AT4G18170  
Orysa4|Os03g55080.1,Orysa4|Os07g02060.1  
Orysa4|Os05g27730.1  
Orysa4|Os04g21950.1  
Orysa4|Os05g46100.1,Orysa4|Os09g32360.1  
AT3G24780,AT5G13210  
Orysa4|Os09g32370.1,Orysa4|Os12g04770.1  
Orysa4|Os06g44240.1,Orysa4|Os02g08330.1  
AT5G43400,AT5G43390  
Orysa4|Os01g27530.1  
AT2G28880 Orysa4|Os06g48620.1  
AT5G05730,AT3G55870,AT2G29690 Orysa4|Os03g15780.1,Orysa4|Os03g61120.1  
AT4G15250,AT3G21880  
Orysa4|Os07g47140.1  
Orysa4|Os09g33550.1,Orysa4|Os08g42440.1  
AT1G68190,AT1G60250  
AT2G47890  
AT2G32310 Orysa4|Os02g01990.1  
AT2G33500,AT1G28050  
Orysa4|Os06g01340.1  
AT5G48250,AT3G07650  
Orysa4|Os02g49230.1,Orysa4|Os06g19444.1  
AT1G05290  
AT1G04510,AT2G33340 Orysa4|Os10g32880.1  
AT1G17870 Orysa4|Os03g51920.1  
AT5G17250 Orysa4|Os10g08940.1  
AT2G18040 Orysa4|Os04g56800.1  
Orysa4|Os04g02830.1  
AT5G35360  
AT1G03090 Orysa4|Os12g41250.1  
AT4G36550  
Orysa4|Os07g39590.1  
AT5G65920,AT3G49810 Orysa4|Os03g13010.1  
Orysa4|Os03g16824.1  
AT1G71020,AT1G23030 Orysa4|Os02g49950.1  
AT4G16490 Orysa4|Os04g25350.1  
AT5G18340,AT5G18320,AT5G18330  
Orysa4|Os06g06490.1  
AT5G64660,AT5G09800,AT3G18710 Orysa4|Os04g34140.1,Orysa4|Os02g33680.1  
AT2G23140,AT5G67340 Orysa4|Os01g66130.1,Orysa4|Os08g01900.1  
Orysa4|Os04g30470.1  
AT1G08315  
AT5G01830 Orysa4|Os01g60860.1  
AT1G01680 Orysa4|Os10g08790.1  
Orysa4|Os07g34840.1  
Orysa4|Os04g35680.1  
AT1G01670 Orysa4|Os03g29280.1  
AT1G10560,AT1G60190  
Orysa4|Os04g41250.1  
AT3G03440 Orysa4|Os01g02200.1  
AT3G54850 Orysa4|Os06g01304.1  
Orysa4|Os01g72600.1  
AT1G29340 Orysa4|Os02g13960.1  
AT4G21350 Orysa4|Os08g04470.1  
AT5G58680,AT3G01400 Orysa4|Os07g39880.1,Orysa4|Os03g32100.1  
AT1G01660  
AT5G14510  
AT3G46510,AT2G28830 Orysa4|Os12g38210.1  
AT3G19380,AT1G49780  
AT2G25130,AT4G31890 Orysa4|Os09g25000.1  
Orysa4|Os10g40490.1,Orysa4|Os10g40120.1  
AT3G54790  
Orysa4|Os04g26050.1,Orysa4|Os09g21120.1,Orysa4|Os07g18580.1  
AT3G07360 Orysa4|Os04g28100.1,Orysa4|Os02g28720.1  
AT5G65200,AT3G47820,AT5G62560,AT5G40140  
Orysa4|Os09g21740.1,Orysa4|Os06g13080.1,Orysa4|Os06g13090.1  
AT5G42340 Orysa4|Os06g51130.1  
Orysa4|Os09g07490.1  
AT3G20170  
Orysa4|Os02g47670.1,Orysa4|Os06g28590.1  
Orysa4|Os11g06000.1  
AT3G61390,AT2G45920

AT1G24330,AT1G67530,AT1G27910 Orysa4|Os01g67500.1  
AT1G15165 Orysa4|Os12g01300.1  
AT4G12710  
AT5G60700 Orysa4|Os09g26440.1,Orysa4|Os12g08300.1,Orysa4|Os02g56260.1  
AT1G05055 Orysa4|Os04g42990.1  
AT3G27325 Orysa4|Os09g09360.1  
AT3G44450,AT3G52740 Orysa4|Os02g32990.1,Orysa4|Os04g33610.1  
AT2G04235 Orysa4|Os06g40590.1  
AT2G44750,AT1G02880 Orysa4|Os01g25440.1  
Orysa4|Os01g70580.1,Orysa4|Os05g30454.1  
AT2G30720  
AT5G48370 Orysa4|Os09g34190.1  
AT4G38020 Orysa4|Os03g48050.1  
Orysa4|Os09g31506.1,Orysa4|Os03g60279.1  
AT1G51410,AT5G19440 Orysa4|Os01g34480.1  
Orysa4|Os01g18120.1,Orysa4|Os01g18110.1,Orysa4|Os02g56690.1,Orysa4|Os02g56700.1,Orysa4|Os02g56460.1,Orysa4|Os09g08720.1  
AT1G25460,AT1G68540  
AT2G33600,AT2G33590,AT1G76470 Orysa4|Os08g08500.1,Orysa4|Os06g41810.1,Orysa4|Os06g41840.1  
AT4G27250 Orysa4|Os06g46920.1  
AT2G02400 Orysa4|Os01g74660.1  
Orysa4|Os09g04050.1,Orysa4|Os08g17500.1,Orysa4|Os02g08420.1  
Orysa4|Os09g09230.1  
Orysa4|Os01g61230.1  
AT1G61720 Orysa4|Os04g53830.1,Orysa4|Os04g53850.1,Orysa4|Os04g53920.1,Orysa4|Os04g53800.1,Orysa4|Os04g53810.1,Orysa4|Os04g53780.1,Orysa4|Os10g33774.1  
Orysa4|Os09g31498.1,Orysa4|Os09g31490.1,Orysa4|Os09g31514.1,Orysa4|Os09g31502.1,Orysa4|Os09g31494.1,Orysa4|Os09g31510.1,Orysa4|Os09g31522.1  
Orysa4|Os06g41800.1  
AT1G09500,AT1G09510,AT1G09490,AT1G09480,AT1G66800  
AT1G80820,AT1G15950 Orysa4|Os08g34280.1,Orysa4|Os09g25150.1  
Orysa4|Os09g09270.1  
Orysa4|Os10g42620.1  
Orysa4|Os07g41070.1,Orysa4|Os07g40690.1,Orysa4|Os07g40974.1,Orysa4|Os07g41060.1,Orysa4|Os06g44170.1,Orysa4|Os06g44180.1  
Orysa4|Os09g31518.1  
Orysa4|Os01g60160.1  
Orysa4|Os01g44260.1  
AT5G14700 Orysa4|Os05g50250.1,Orysa4|Os01g45200.1  
AT4G35420 Orysa4|Os08g40440.1  
AT2G45400  
AT2G23910,AT4G30470  
AT5G58490 Orysa4|Os03g60380.1  
AT5G42800  
AT1G67620 Orysa4|Os12g13824.1  
AT3G56990 Orysa4|Os06g03780.1  
AT4G32750 Orysa4|Os02g17250.1  
AT2G40420,AT3G56200 Orysa4|Os01g61044.1  
AT3G30390,AT5G38820 Orysa4|Os09g26290.1,Orysa4|Os02g49510.1,Orysa4|Os06g16420.1  
AT1G80510 Orysa4|Os06g43700.1  
Orysa4|Os02g09810.1,Orysa4|Os06g42720.1  
Orysa4|Os02g58090.1  
AT4G21660  
AT1G11520Orysa4|Os02g15960.1  
AT1G09880 Orysa4|Os12g03790.1  
AT2G22620,AT4G37950,AT1G65210,AT4G38030  
Orysa4|Os08g21720.1  
AT1G09910,AT1G09890 Orysa4|Os08g44040.1,Orysa4|Os08g44020.1  
AT4G24430 Orysa4|Os04g52380.1  
AT5G52230 Orysa4|Os08g10580.1  
AT5G63540 Orysa4|Os04g32090.1  
Orysa4|Os12g42090.1  
Orysa4|Os07g08200.1  
AT3G63410 Orysa4|Os01g11960.1  
Orysa4|Os12g41900.1  
AT4G27910,AT5G53430 Orysa4|Os01g46700.1  
Orysa4|Os08g34370.1  
AT5G42400 Orysa4|Os09g38440.1  
AT3G61740 Orysa4|Os01g11952.1  
AT1G77290 Orysa4|Os04g35560.1  
AT2G37680 Orysa4|Os01g05090.1  
AT1G27300 Orysa4|Os02g30610.1  
AT2G24120 Orysa4|Os06g44230.1  
Orysa4|Os09g07120.1

AT1G68990  
AT5G15700  
AT1G72010,AT1G35560,AT1G58100  
AT5G08330,AT5G23280 Orysa4|Os04g44440.1,Orysa4|Os02g42380.1  
AT3G47620 Orysa4|Os06g12230.1,Orysa4|Os02g51280.1  
AT5G51910,AT2G45680 Orysa4|Os09g34950.1,Orysa4|Os08g43160.1  
AT2G37000  
AT1G69690  
Orysa4|Os11g07460.1,Orysa4|Os12g07480.1  
Orysa4|Os04g11830.1  
Orysa4|Os01g69980.1  
AT3G45150 Orysa4|Os01g14380.1  
AT3G27010,AT5G41030  
AT2G22890,AT1G62190,AT4G27030 Orysa4|Os08g08850.1  
Orysa4|Os02g37600.1  
AT2G04790  
AT5G09310 Orysa4|Os01g72960.1  
AT1G14280,AT2G02950,AT1G18810 Orysa4|Os10g26670.1  
AT1G77700 Orysa4|Os04g59370.1  
Orysa4|Os12g38170.1,Orysa4|Os12g38150.1,Orysa4|Os11g47680.1,Orysa4|Os11g47670.1  
Orysa4|Os10g05600.1,Orysa4|Os03g14030.1  
Orysa4|Os10g38100.1  
Orysa4|Os06g16990.1  
Orysa4|Os07g23730.1  
Orysa4|Os12g43450.1,Orysa4|Os12g43490.1,Orysa4|Os12g43410.1,Orysa4|Os12g43380.1,Orysa4|Os12g43430.1,Orysa4|Os12g43440.1  
AT2G24810,AT1G19320,AT1G75050,AT1G75030,AT1G75040  
AT5G38280  
AT4G24180,AT4G38660,AT4G36000 Orysa4|Os08g43510.1  
AT2G28790 Orysa4|Os01g62260.1  
Orysa4|Os01g62180.1  
AT5G40020 Orysa4|Os10g27280.1  
AT4G11650,Orysa4|Os03g46060.1,Orysa4|Os03g45960.1  
AT4G38670,AT1G20030,AT1G75800,AT2G17860,AT4G36010  
Orysa4|Os03g14050.1,Orysa4|Os10g05660.1,Orysa4|Os06g50240.1,Orysa4|Os09g36560.1  
AT5G02140 Orysa4|Os11g47944.1  
AT1G73620,AT1G18250 Orysa4|Os06g47600.1  
AT5G24620 Orysa4|Os08g40600.1,Orysa4|Os09g32280.1  
Orysa4|Os02g02200.1,Orysa4|Os03g13070.1  
AT5G66680 Orysa4|Os07g10830.1  
AT5G41190,Orysa4|Os02g02360.1  
AT5G16100 Orysa4|Os12g12970.1  
Orysa4|Os01g14420.1  
Orysa4|Os05g42230.1  
AT5G54430,AT4G27320 Orysa4|Os03g25830.1,Orysa4|Os07g36600.1  
AT1G11360  
Orysa4|Os05g38810.1  
AT3G09670,AT5G02950 Orysa4|Os05g03110.1,Orysa4|Os11g19810.1  
Orysa4|Os05g38800.1  
AT3G54760 Orysa4|Os05g01100.1  
AT3G27860 Orysa4|Os12g44130.1  
Orysa4|Os07g49380.1  
Orysa4|Os04g28010.1  
AT5G51340  
AT2G15270 Orysa4|Os09g01690.1  
AT3G08640,AT3G08630  
Orysa4|Os01g59740.1  
Orysa4|Os08g15070.1,Orysa4|Os02g08170.1,Orysa4|Os06g44420.1  
AT2G24762,AT4G31730,AT5G24920,AT3G30725  
AT5G38770 Orysa4|Os06g42660.1  
AT4G25760,AT5G57685 Orysa4|Os08g34700.1  
AT3G01150,Orysa4|Os03g25980.1  
AT5G53180  
Orysa4|Os08g33830.1  
Orysa4|Os01g43170.1  
AT1G16820,AT1G78900 Orysa4|Os02g07870.1,Orysa4|Os06g45120.1  
AT1G28120 Orysa4|Os08g42540.1  
Orysa4|Os04g55840.1  
Orysa4|Os06g23430.1  
AT1G48160  
AT4G34700 Orysa4|Os06g50000.1  
Orysa4|Os11g30950.1,Orysa4|Os05g23830.1  
Orysa4|Os06g24500.1  
AT1G58370,AT4G08160,AT1G10050 Orysa4|Os03g47010.1  
Orysa4|Os05g23350.1,Orysa4|Os05g25560.1,Orysa4|Os01g04300.1,Orysa4|Os01g04290.1  
AT4G11790,Orysa4|Os03g46480.1  
Orysa4|Os08g28860.1,Orysa4|Os08g28840.1  
AT2G33980,AT1G28960,AT5G45940 Orysa4|Os05g11870.1  
Orysa4|Os02g54690.1  
AT3G11400,AT5G06000 Orysa4|Os02g54700.1  
AT5G19540 Orysa4|Os08g29780.1  
Orysa4|Os11g07470.1

AT3G01780  
AT4G21570,AT1G11200 Orysa4|Os07g32230.1  
AT5G07230,AT5G62080,AT5G52160 Orysa4|Os09g35700.1,Orysa4|Os08g43290.1  
AT1G32300,AT5G56490,AT5G56470,AT2G46750,AT2G46740,AT2G46760  
Orysa4|Os04g29210.1,Orysa4|Os08g02230.1,Orysa4|Os02g03200.1,Orysa4|Os02g03210.1,Orysa4|Os08  
g40720.1,Orysa4|Os03g36530.1  
AT5G11540Orysa4|Os01g49360.1  
AT2G21240,AT4G38910  
AT5G42520 Orysa4|Os06g04010.1  
AT2G21237  
AT1G14685,AT2G01930,AT1G68120 Orysa4|Os10g02509.1,Orysa4|Os10g02584.1,Orysa4|Os10g02620.1  
AT2G35550  
AT1G27420,AT1G67480 Orysa4|Os04g31120.1,Orysa4|Os02g30210.1  
Orysa4|Os11g42360.1  
AT2G45720 Orysa4|Os10g37850.1,Orysa4|Os03g02580.1  
Orysa4|Os02g06530.1  
AT1G61350 Orysa4|Os07g37350.1  
AT5G50900 Orysa4|Os12g26720.1  
AT2G05810 Orysa4|Os09g05030.1  
AT1G01830  
AT2G21280 Orysa4|Os02g58790.1  
Orysa4|Os02g10600.1,Orysa4|Os09g20650.1  
AT3G20620 Orysa4|Os05g49450.1  
Orysa4|Os02g56810.1,Orysa4|Os02g56820.1,Orysa4|Os02g56840.1,Orysa4|Os02g56760.1,Orysa4|Os02  
g56770.1,Orysa4|Os02g56750.1,Orysa4|Os08g05480.1  
Orysa4|Os09g01890.1  
AT2G02280,AT1G80110,AT1G56240,AT1G56250,AT1G09155  
AT5G24560 Orysa4|Os04g21130.1  
AT2G02300,AT2G02310,AT2G02240,AT2G02250,AT2G02320,AT2G02340,AT2G02360,AT2G02350,AT2G02230  
Orysa4|Os12g03594.1  
AT1G55670 Orysa4|Os09g30340.1  
AT1G43190 Orysa4|Os01g64770.1,Orysa4|Os05g36120.1  
Orysa4|Os06g30270.1  
AT2G22650 Orysa4|Os06g08300.1  
AT5G42330 Orysa4|Os07g29190.1  
AT2G43990 Orysa4|Os11g14240.1  
AT5G11710Orysa4|Os01g53670.1,Orysa4|Os04g51120.1  
AT2G43160,AT3G59290 Orysa4|Os02g56270.1  
AT4G01710 Orysa4|Os11g35360.1  
AT1G10220,AT1G59590 Orysa4|Os07g39720.1,Orysa4|Os03g31740.1  
AT1G80360 Orysa4|Os01g08270.1  
AT5G56940 Orysa4|Os08g40610.1,Orysa4|Os09g32270.1  
AT4G34620  
AT2G22240,AT4G39800,AT5G10170 Orysa4|Os10g22450.1,Orysa4|Os03g09250.1  
AT4G21770 Orysa4|Os07g46600.1  
AT2G41950 Orysa4|Os03g12560.1  
AT3G44360,AT1G65080 Orysa4|Os06g07474.1  
AT3G44370  
AT1G05620 Orysa4|Os03g31170.1  
AT2G36310 Orysa4|Os09g39440.1,Orysa4|Os08g44370.1  
AT5G65000 Orysa4|Os02g36390.1  
AT4G39970 Orysa4|Os08g37940.1  
AT3G48420 Orysa4|Os03g36750.1  
Orysa4|Os02g04520.1  
AT3G22942,AT3G63420 Orysa4|Os03g43480.1  
AT1G09920 Orysa4|Os03g24184.1,Orysa4|Os07g46390.1  
Orysa4|Os12g16640.1  
AT3G23480,AT3G23470,AT3G23510,AT3G23530,AT3G23460 Orysa4|Os07g29220.1,Orysa4|Os12g16650.1  
Orysa4|Os07g29200.1  
AT4G23885,AT5G24165 Orysa4|Os06g33920.1  
AT5G51970 Orysa4|Os08g43190.1  
Orysa4|Os10g22970.1,Orysa4|Os10g36340.1  
AT1G66000,AT1G66060,AT2G03010,AT4G16530,AT5G37420,AT5G37430,AT5G37920,AT5G37410,AT4G09440,AT5  
G37470,AT5G37460,AT5G37400,AT5G37650,AT1G66110  
AT1G61620 Orysa4|Os03g17170.1  
Orysa4|Os01g20160.1  
AT4G10310 Orysa4|Os04g51820.1,Orysa4|Os02g07830.1  
Orysa4|Os06g48800.1,Orysa4|Os06g48810.1  
Orysa4|Os04g51830.1  
Orysa4|Os04g43350.1  
AT4G13200  
AT5G12260 Orysa4|Os01g18060.1  
AT3G43340,AT2G39140 Orysa4|Os03g05806.1  
AT4G00355,AT2G45980 Orysa4|Os02g57600.1,Orysa4|Os04g08310.1  
Orysa4|Os07g23550.1  
AT1G26120,AT3G02410,AT5G15860 Orysa4|Os01g45460.1,Orysa4|Os05g50170.1,Orysa4|Os06g49440.1  
AT3G16270 Orysa4|Os01g13160.1  
AT2G32330,AT2G31580,AT2G32320 Orysa4|Os05g45890.1  
AT5G39600 Orysa4|Os02g18090.1  
Orysa4|Os03g08880.1  
AT1G75470,AT1G19770,AT1G57990,AT1G57943,AT1G57980,AT1G09860,AT1G47603  
AT2G33750,AT1G28230,AT1G28220

AT2G24220 Orysa4|Os09g38510.1  
AT1G44750,AT5G41160,AT4G08700 Orysa4|Os04g49739.1,Orysa4|Os02g46380.1  
AT1G30840 Orysa4|Os05g48300.1,Orysa4|Os01g48800.1,Orysa4|Os01g31940.1  
AT4G18210,AT4G18220,AT4G18197,AT4G18205,AT4G18195,AT4G18190  
Orysa4|Os09g29239.1  
Orysa4|Os09g37640.1,Orysa4|Os04g49757.1,Orysa4|Os01g11820.1,Orysa4|Os04g49748.1  
AT3G05250 Orysa4|Os03g59540.1  
AT5G19485 Orysa4|Os06g23160.1  
AT5G13710 Orysa4|Os07g10600.1  
Orysa4|Os03g59290.1  
Orysa4|Os11g19140.1  
AT1G52380,AT3G15970 Orysa4|Os05g28190.1  
AT5G26800,AT3G05810 Orysa4|Os10g05940.1,Orysa4|Os01g19400.1  
AT1G15340,AT3G15790  
Orysa4|Os12g42550.1  
Orysa4|Os09g12220.1  
AT1G22770 Orysa4|Os01g08700.1  
Orysa4|Os08g05650.1  
AT5G23450 Orysa4|Os04g45800.1,Orysa4|Os10g37280.1  
AT4G14160,AT3G23660,AT1G05520 Orysa4|Os11g24560.1  
AT2G21630 Orysa4|Os09g28610.1  
AT5G43670 Orysa4|Os03g53140.1  
AT3G48210 Orysa4|Os01g37030.1,Orysa4|Os01g74170.1,Orysa4|Os05g02000.1  
AT3G21290 Orysa4|Os03g08820.1  
AT3G28155  
AT2G35630 Orysa4|Os01g60050.1,Orysa4|Os01g60040.1  
AT1G21140,AT3G43630,AT3G43660,AT1G76800,AT3G25190 Orysa4|Os04g45520.1,Orysa4|Os02g43030.1  
Orysa4|Os11g06310.1,Orysa4|Os04g59020.1  
AT3G29010 Orysa4|Os08g33810.1  
AT1G04390 Orysa4|Os06g46240.1  
AT1G35490 Orysa4|Os12g09250.1  
AT1G58110,Orysa4|Os11g11100.1,Orysa4|Os12g09270.1  
AT4G35250 Orysa4|Os08g44000.1  
AT1G08780 Orysa4|Os03g43020.1  
AT4G29070 Orysa4|Os07g46420.1  
AT1G73010,AT1G17710,AT4G29530 Orysa4|Os02g13290.1,Orysa4|Os01g52230.1,Orysa4|Os01g41660.1  
Orysa4|Os03g10790.1  
AT4G14965  
AT1G33680,AT4G10070 Orysa4|Os08g01930.1  
Orysa4|Os02g13130.1  
AT4G25280 Orysa4|Os04g01530.1  
AT5G26667 Orysa4|Os07g43170.1,Orysa4|Os02g53790.1  
Orysa4|Os06g02000.1  
AT3G60180  
Orysa4|Os06g10200.1  
AT3G21150,Orysa4|Os02g07930.1,Orysa4|Os06g45040.1  
AT3G01200  
AT4G21210  
Orysa4|Os07g34640.1  
AT1G03060  
AT4G02660  
Orysa4|Os03g53280.1  
AT1G77540,AT1G21770 Orysa4|Os04g35200.1  
AT2G33630 Orysa4|Os02g48460.1  
AT3G26690,AT1G12880 Orysa4|Os11g32750.1,Orysa4|Os04g32740.1  
AT1G18300,AT1G73540  
AT1G14860,AT2G01670 Orysa4|Os06g14420.1,Orysa4|Os02g50130.1  
AT3G12600 Orysa4|Os03g59580.1,Orysa4|Os07g11120.1  
AT3G18050,AT4G28100 Orysa4|Os06g30210.1  
AT1G02680 Orysa4|Os01g23630.1  
AT4G23950 Orysa4|Os01g41600.1  
AT1G22882,AT1G71360  
AT3G55250 Orysa4|Os05g45030.1  
AT5G05010 Orysa4|Os01g61710.1,Orysa4|Os05g24594.1  
Orysa4|Os03g21830.1  
AT2G40600  
Orysa4|Os06g34540.1,Orysa4|Os08g04480.1  
AT2G36305 Orysa4|Os05g28950.1  
AT2G47960 Orysa4|Os10g35570.1  
AT4G26520,AT4G26530 Orysa4|Os06g40640.1  
AT2G21330,AT4G38970  
AT2G01140,Orysa4|Os01g02880.1  
Orysa4|Os09g02540.1  
Orysa4|Os08g02700.1  
AT3G52930,AT2G36460,AT5G03690 Orysa4|Os10g08022.1,Orysa4|Os05g33380.1,Orysa4|Os01g67860.1  
Orysa4|Os12g07210.1  
AT3G11750,AT5G62980,AT3G21730  
Orysa4|Os06g06100.1,Orysa4|Os09g38759.1,Orysa4|Os08g44210.1  
Orysa4|Os02g09060.1  
AT2G27160,AT2G26000  
AT2G42160 Orysa4|Os04g55480.1  
Orysa4|Os01g08280.1



AT5G19950  
AT5G14105 Orysa4|Os01g46650.1,Orysa4|Os03g52280.1  
AT3G25950,AT5G14280,AT3G27270,AT4G00270 Orysa4|Os12g13940.1,Orysa4|Os05g23700.1  
AT5G42220  
AT5G11080,AT5G25270 Orysa4|Os08g19830.1  
AT5G24650,AT3G49560 Orysa4|Os02g32530.1,Orysa4|Os04g33220.1  
AT4G17260 Orysa4|Os06g01590.1,Orysa4|Os02g01510.1  
AT1G50840,AT3G20540 Orysa4|Os04g54500.1,Orysa4|Os08g07840.1  
Orysa4|Os01g40980.1  
AT1G79950  
AT2G05635,AT1G20720,AT1G20750 Orysa4|Os09g37920.1  
AT5G08040 Orysa4|Os12g38650.1  
AT1G13820,AT5G39220 Orysa4|Os07g41080.1  
AT5G46160,AT1G17560 Orysa4|Os12g42180.1  
Orysa4|Os01g57950.1  
AT3G06930,AT5G49020 Orysa4|Os07g47500.1  
AT5G52880 Orysa4|Os01g11780.1,Orysa4|Os05g45040.1  
Orysa4|Os10g30054.1  
AT5G13020,AT2G44440  
AT3G12140,AT5G06780 Orysa4|Os09g10710.1,Orysa4|Os08g23930.1  
Orysa4|Os08g39970.1,Orysa4|Os04g56440.1  
AT4G36980 Orysa4|Os03g27840.1  
Orysa4|Os04g52479.1,Orysa4|Os08g31470.1  
AT2G35155,AT5G45030  
AT3G12950  
AT1G31010,AT5G44785,AT4G20010 Orysa4|Os03g41530.1,Orysa4|Os01g72049.1  
AT5G13100 Orysa4|Os07g37120.1,Orysa4|Os01g01295.1  
AT4G27585,AT5G54100  
Orysa4|Os01g45040.1  
Orysa4|Os08g15600.1  
Orysa4|Os08g06200.1  
AT3G14930 Orysa4|Os01g43390.1  
AT2G40490 Orysa4|Os03g22060.1,Orysa4|Os03g21900.1  
AT1G11040,AT1G44160  
Orysa4|Os02g10220.1  
Orysa4|Os01g13760.1  
AT2G20550  
Orysa4|Os01g01160.1  
AT2G20560,AT4G28480 Orysa4|Os02g20394.1  
AT4G13830  
AT5G16650 Orysa4|Os02g46640.1  
AT2G41000 Orysa4|Os01g17040.1  
AT2G33735 Orysa4|Os02g52270.1  
AT1G56300,AT1G71000 Orysa4|Os01g42190.1  
Orysa4|Os05g03630.1  
AT5G49060 Orysa4|Os05g30130.1  
AT5G25530 Orysa4|Os08g28700.1  
AT3G08910,AT5G01390  
Orysa4|Os08g35160.1  
Orysa4|Os09g20320.1  
AT1G10350,AT1G59725,AT3G47940  
Orysa4|Os07g32950.1  
AT3G14200 Orysa4|Os06g09560.1,Orysa4|Os02g54130.1  
AT1G72416  
Orysa4|Os02g03600.1,Orysa4|Os08g06460.1  
Orysa4|Os03g18200.1  
Orysa4|Os12g34400.1  
Orysa4|Os05g28300.1  
AT5G22450 Orysa4|Os05g01690.1,Orysa4|Os01g73620.1  
AT4G29790,AT2G19390  
AT1G09710,AT1G58220 Orysa4|Os02g34630.1  
AT5G47120 Orysa4|Os02g03280.1  
AT5G47130,AT4G17580  
Orysa4|Os05g38710.1  
AT3G09560  
AT5G42870 Orysa4|Os11g40080.1  
AT4G17240 Orysa4|Os03g53970.1,Orysa4|Os05g46920.1  
AT4G31420,AT2G24500 Orysa4|Os06g47840.1  
AT4G12230 Orysa4|Os10g08840.1  
AT5G40850 Orysa4|Os01g44050.1  
AT5G48790 Orysa4|Os02g03670.1  
AT3G22560  
AT2G32030,AT2G32020  
Orysa4|Os03g58020.1,Orysa4|Os03g58010.1,Orysa4|Os03g58030.1,Orysa4|Os04g18810.1,Orysa4|Os03  
g46200.1  
Orysa4|Os01g09800.1  
Orysa4|Os03g46440.1  
AT5G45110,AT4G19660  
AT4G26120,AT1G64280  
AT3G60620,AT2G45150 Orysa4|Os02g03460.1  
AT3G59870,AT2G43945 Orysa4|Os01g23680.1  
AT5G56980,AT4G26130,AT2G26110

Orysa4|Os01g51310.1,Orysa4|Os05g46340.1,Orysa4|Os09g19970.1,Orysa4|Os08g31090.1,Orysa4|Os06g37020.1  
AT4G30220 Orysa4|Os11g43620.1,Orysa4|Os02g08090.1  
Orysa4|Os12g10410.1,Orysa4|Os03g14900.1,Orysa4|Os09g14060.1,Orysa4|Os09g14010.1,Orysa4|Os09g14100.1,Orysa4|Os03g10910.1,Orysa4|Os09g15390.1,Orysa4|Os09g10054.1,Orysa4|Os12g30720.1,Orysa4|Os12g30760.1,Orysa4|Os11g36410.1  
AT1G52660,AT3G15700  
Orysa4|Os01g58530.1  
AT4G26090 Orysa4|Os04g43440.1  
AT1G62630,AT1G63360,AT1G63350,AT5G63020,AT1G12220,AT1G12210,AT1G12280,AT4G10780,AT1G12290,AT1G61310,AT1G61180,AT1G61300,AT1G61190,AT1G51480,AT5G43730,AT5G43740,AT1G15890,AT5G05400,AT5G47260,AT5G47250  
AT4G27190,AT4G27220 Orysa4|Os04g39460.1  
AT5G07470,AT5G61640,AT5G07460  
Orysa4|Os04g40620.1,Orysa4|Os04g40600.1,Orysa4|Os10g41400.1  
AT2G18030 Orysa4|Os06g04650.1  
AT4G25130  
AT1G58460 Orysa4|Os04g28410.1  
AT5G64160 Orysa4|Os02g51700.1  
AT1G08530  
AT5G09995  
Orysa4|Os12g24240.1  
AT1G47780,AT1G47786,AT1G52695,AT1G52460,AT1G52440,AT1G52470,AT1G51300  
AT3G15650,AT1G52700,AT5G20060 Orysa4|Os01g07960.1  
Orysa4|Os05g51050.1,Orysa4|Os04g09540.1,Orysa4|Os01g42690.1  
AT1G44780,AT4G08310 Orysa4|Os11g34190.1  
AT3G63460,AT1G18830 Orysa4|Os07g46370.1  
Orysa4|Os02g03990.1  
AT4G18120,AT1G29400  
AT2G42890  
AT5G07290,AT5G61960 Orysa4|Os05g01240.1,Orysa4|Os02g31290.1  
AT1G37140 Orysa4|Os09g36140.1,Orysa4|Os02g06320.1  
AT3G26120,AT1G67770 Orysa4|Os01g68000.1  
Orysa4|Os02g48790.1  
AT5G07930  
AT5G59470,AT4G07390 Orysa4|Os07g29610.1  
Orysa4|Os09g09320.1  
AT1G71480  
AT3G60200,AT2G44600  
Orysa4|Os09g07150.1,Orysa4|Os10g41800.1,Orysa4|Os04g49850.1,Orysa4|Os02g46420.1  
AT5G01960 Orysa4|Os01g07390.1  
AT3G61540 Orysa4|Os06g06820.1  
AT1G75690 Orysa4|Os03g14040.1  
AT3G22100,AT1G30670,AT2G34820 Orysa4|Os12g31430.1  
AT3G11964,Orysa4|Os07g10350.1  
AT5G20020,AT5G20010  
AT5G55080  
AT5G55190 Orysa4|Os01g42530.1  
AT1G77630,AT1G21880 Orysa4|Os06g10660.1,Orysa4|Os02g53000.1  
AT2G17120 Orysa4|Os11g34570.1,Orysa4|Os03g04110.1,Orysa4|Os09g37600.1  
Orysa4|Os09g27890.1  
AT1G47640 Orysa4|Os03g55730.1  
AT1G72170,AT1G22520 Orysa4|Os03g62420.1  
AT1G11800,Orysa4|Os12g22620.1  
Orysa4|Os07g32610.1  
AT2G30710 Orysa4|Os09g34040.1  
Orysa4|Os04g57300.1  
AT1G13640,AT2G03890,AT1G26270 Orysa4|Os08g38200.1,Orysa4|Os09g29890.1,Orysa4|Os06g17290.1  
AT2G40850,AT3G56600 Orysa4|Os11g08480.1,Orysa4|Os01g16470.1  
AT2G46200 Orysa4|Os01g12670.1  
AT4G28700 Orysa4|Os02g40730.1,Orysa4|Os04g43070.1,Orysa4|Os02g40710.1  
AT3G24290,AT3G24300,AT4G13510,AT1G64780  
Orysa4|Os04g28270.1  
AT4G30340,AT2G18730,AT5G57690 Orysa4|Os02g54650.1  
AT1G52530 Orysa4|Os04g44620.1  
Orysa4|Os01g74250.1  
AT2G20670,AT4G32480 Orysa4|Os05g44300.1,Orysa4|Os01g54340.1  
AT3G22970,AT4G14620,AT3G54550,AT2G38820  
Orysa4|Os10g28210.1,Orysa4|Os03g06680.1,Orysa4|Os07g08390.1  
AT1G77160,AT1G77145 Orysa4|Os01g65740.1  
AT1G12030,AT1G62420 Orysa4|Os01g68650.1,Orysa4|Os11g25040.1,Orysa4|Os02g48850.1  
AT2G39650  
AT1G21475  
AT3G07350,AT3G25240  
AT5G13950 Orysa4|Os07g27760.1  
AT1G04640 Orysa4|Os03g20560.1  
AT1G47580,AT4G31050  
AT2G46900 Orysa4|Os09g33970.1  
AT1G26160 Orysa4|Os01g45390.1  
AT2G23820 Orysa4|Os02g08260.1  
Orysa4|Os03g52470.1  
AT1G27470,AT4G07410

Orysa4|Os04g35050.1  
AT2G40430  
Orysa4|Os05g05220.1  
AT4G36050 Orysa4|Os09g36530.1  
AT4G23960,AT4G10925 Orysa4|Os01g36940.1  
AT5G46030  
Orysa4|Os06g06270.1  
AT3G15190 Orysa4|Os01g48690.1  
AT5G19330 Orysa4|Os05g33050.1  
AT5G13060  
AT1G72530  
AT2G35240,AT1G32580  
AT3G06790 Orysa4|Os03g38490.1  
Orysa4|Os06g02600.1,Orysa4|Os04g51280.1  
AT2G33430  
AT1G11430Orysa4|Os08g04450.1  
AT3G18680  
AT3G10030  
Orysa4|Os01g73450.1  
AT1G69060 Orysa4|Os03g54150.1  
AT3G45590,AT3G45577,AT5G60230 Orysa4|Os06g33980.1,Orysa4|Os11g38930.1  
AT1G47310  
AT5G64510 Orysa4|Os01g56180.1  
AT3G12620,AT3G55050,AT5G02760  
Orysa4|Os03g04430.1  
AT5G66080,AT3G51370 Orysa4|Os06g50380.1  
AT3G17090 Orysa4|Os03g61690.1  
AT4G33920 Orysa4|Os12g39120.1  
Orysa4|Os03g10950.1  
AT4G38520  
AT5G06750 Orysa4|Os04g49490.1,Orysa4|Os02g46080.1  
Orysa4|Os07g02330.1,Orysa4|Os03g55320.1  
Orysa4|Os01g74530.1  
AT1G77510,AT1G21750,AT3G62510  
Orysa4|Os02g34940.1,Orysa4|Os04g35600.1,Orysa4|Os11g09280.1  
AT2G34980 Orysa4|Os02g40870.1  
AT2G17030,AT2G17036,AT5G60060,AT5G55150,AT5G24040 Orysa4|Os04g49360.1  
AT5G20650 Orysa4|Os08g35490.1,Orysa4|Os09g26900.1  
AT5G06240 Orysa4|Os08g13219.1,Orysa4|Os05g02190.1  
AT2G43420 Orysa4|Os09g34090.1  
AT2G26260,AT1G47290 Orysa4|Os03g29150.1,Orysa4|Os03g29170.1  
AT3G59950,AT2G44140 Orysa4|Os03g27350.1,Orysa4|Os04g58560.1  
AT2G13650  
AT1G07290 Orysa4|Os03g61100.1  
AT5G37510 Orysa4|Os03g50540.1  
AT3G08530,AT3G11130 Orysa4|Os11g01380.1,Orysa4|Os12g01390.1  
Orysa4|Os02g37330.1,Orysa4|Os02g37320.1,Orysa4|Os02g37290.1,Orysa4|Os02g37280.1,Orysa4|Os02g37300.1,Orysa4|Os04g39010.1,Orysa4|Os04g39350.1,Orysa4|Os04g39370.1,Orysa4|Os04g39360.1,Orysa4|Os04g39380.1  
AT4G05030  
AT1G55780  
Orysa4|Os04g39300.1,Orysa4|Os04g39290.1,Orysa4|Os02g37180.1,Orysa4|Os09g15860.1,Orysa4|Os02g37160.1  
AT3G20180  
AT5G48290,AT3G07600 Orysa4|Os09g09930.1  
AT3G14050,AT1G54130 Orysa4|Os09g27050.1,Orysa4|Os08g35620.1  
Orysa4|Os02g47120.1  
Orysa4|Os07g42160.1  
Orysa4|Os07g44830.1,Orysa4|Os03g24940.1  
AT3G56480,AT2G40820,AT2G26770 Orysa4|Os01g59130.1  
AT3G43240  
Orysa4|Os08g27240.1,Orysa4|Os08g35010.1,Orysa4|Os08g35050.1,Orysa4|Os08g35000.1,Orysa4|Os09g26390.1  
Orysa4|Os12g24130.1,Orysa4|Os03g31970.1,Orysa4|Os11g25900.1  
Orysa4|Os12g34390.1  
AT1G42710  
Orysa4|Os10g29170.1  
Orysa4|Os09g14530.1,Orysa4|Os01g18920.1,Orysa4|Os08g34830.1,Orysa4|Os12g08960.1,Orysa4|Os07g25550.1  
Orysa4|Os02g27100.1,Orysa4|Os01g08610.1,Orysa4|Os04g16130.1,Orysa4|Os02g13930.1,Orysa4|Os02g26460.1,Orysa4|Os02g19230.1,Orysa4|Os02g43780.1,Orysa4|Os02g38700.1,Orysa4|Os04g18540.1,Orysa4|Os04g15910.1  
Orysa4|Os06g23540.1  
Orysa4|Os10g30820.1  
Orysa4|Os08g07550.1  
Orysa4|Os02g27020.1  
Orysa4|Os09g19150.1  
Orysa4|Os01g22720.1  
Orysa4|Os11g14270.1,Orysa4|Os11g14280.1,Orysa4|Os11g39200.1,Orysa4|Os08g27290.1,Orysa4|Os02g19850.1,Orysa4|Os05g10640.1,Orysa4|Os06g02090.1,Orysa4|Os11g28740.1,Orysa4|Os08g24480.1,Orysa4|Os07g15340.1,Orysa4|Os06g11830.1,Orysa4|Os04g12190.1,Orysa4|Os04g21740.1,Orysa4|Os05g14500.1,Orysa4|Os06g36530.1

Orysa4|Os05g35300.1  
AT3G29450,AT1G41920,AT4G09660,AT1G19260,AT3G29763,AT3G29765 Orysa4|Os07g28150.1  
AT4G37010  
AT3G47480  
Orysa4|Os05g13580.1,Orysa4|Os01g04330.1,Orysa4|Os05g31620.1,Orysa4|Os01g72100.1  
AT3G01830  
AT1G24620  
Orysa4|Os12g04580.1,Orysa4|Os12g04560.1,Orysa4|Os03g59870.1,Orysa4|Os03g59790.1,Orysa4|Os03g59770.1,Orysa4|Os11g04820.1,Orysa4|Os07g12240.1,Orysa4|Os09g24580.1  
AT1G66410,AT5G37780  
AT1G18210,AT1G73630,AT5G37770,AT1G66400,AT2G36180,AT5G17470,AT3G03400,AT3G03410  
AT3G25600,AT1G18530 Orysa4|Os01g41990.1,Orysa4|Os05g50180.1  
AT5G17480,AT3G03430 Orysa4|Os08g44660.1  
Orysa4|Os03g50760.1  
Orysa4|Os05g22270.1  
Orysa4|Os01g59530.1  
Orysa4|Os07g43800.1  
Orysa4|Os12g03816.1  
AT3G51920  
AT3G56800,AT2G27030,AT2G41110,AT3G43810,AT5G21274  
Orysa4|Os03g20370.1,Orysa4|Os07g48780.1,Orysa4|Os01g16240.1  
Orysa4|Os11g37550.1  
AT5G44460,AT4G20780 Orysa4|Os07g48340.1  
Orysa4|Os05g41200.1  
Orysa4|Os10g25010.1  
Orysa4|Os06g47640.1  
AT3G03000,AT1G32250 Orysa4|Os01g32120.1  
AT4G14640,AT3G22930  
AT1G76650,AT1G76640,AT5G42380  
Orysa4|Os01g72540.1,Orysa4|Os01g72550.1,Orysa4|Os11g01390.1,Orysa4|Os12g01400.1,Orysa4|Os01g72530.1  
Orysa4|Os04g30050.1  
AT5G49480 Orysa4|Os03g19720.1  
AT1G21550  
AT2G15680 Orysa4|Os09g28490.1  
AT1G12310,AT1G62820 Orysa4|Os08g02420.1  
AT2G41090,AT2G41100  
AT5G39670,AT3G29000 Orysa4|Os11g38780.1  
Orysa4|Os02g50080.1,Orysa4|Os02g50060.1  
AT3G59450  
Orysa4|Os03g53200.1  
Orysa4|Os05g41210.1  
Orysa4|Os01g17190.1  
AT3G50770  
Orysa4|Os06g07560.1  
AT4G03290,AT1G05990,AT3G07490,AT3G59440,AT2G43290,AT4G12860 Orysa4|Os12g12730.1  
Orysa4|Os12g41110.1  
Orysa4|Os05g24780.1  
Orysa4|Os01g56030.1  
Orysa4|Os02g39380.1,Orysa4|Os04g41540.1  
AT3G50360 Orysa4|Os07g42660.1  
AT2G41410,AT3G10190 Orysa4|Os11g04560.1,Orysa4|Os12g04360.1,Orysa4|Os01g72080.1  
AT2G23093 Orysa4|Os08g02190.1  
AT1G64650,AT3G49310,AT4G27720 Orysa4|Os03g02380.1,Orysa4|Os10g37520.1  
AT3G27670 Orysa4|Os01g07490.1  
AT1G07350  
Orysa4|Os08g29650.1  
AT4G35785 Orysa4|Os06g50890.1  
Orysa4|Os01g26840.1  
Orysa4|Os03g15890.1  
Orysa4|Os08g36550.1,Orysa4|Os09g27960.1  
AT1G36980 Orysa4|Os02g35880.1  
AT1G62250 Orysa4|Os03g53300.1  
AT5G47140,AT4G17570 Orysa4|Os04g46020.1  
AT4G33030 Orysa4|Os05g32140.1  
Orysa4|Os01g01700.1  
Orysa4|Os02g47870.1  
AT3G42830,AT5G20570  
Orysa4|Os08g15270.1,Orysa4|Os06g39720.1,Orysa4|Os12g10590.1  
Orysa4|Os03g19510.1  
Orysa4|Os03g29810.1  
AT4G17040  
Orysa4|Os01g16530.1  
AT5G23140  
AT1G11750  
AT1G12410  
AT1G66670 Orysa4|Os01g32350.1  
AT5G45390 Orysa4|Os10g43050.1  
AT1G02560  
Orysa4|Os06g04530.1  
Orysa4|Os03g22430.1  
AT1G32410

AT3G11530 Orysa4|Os01g73570.1  
AT3G24650 Orysa4|Os01g68370.1  
AT1G28300  
AT3G26790  
Orysa4|Os04g58010.1,Orysa4|Os04g58000.1,Orysa4|Os08g01090.1,Orysa4|Os01g51610.1  
AT4G19140 Orysa4|Os04g51166.1  
AT4G28740  
Orysa4|Os04g42800.1  
AT1G27980 Orysa4|Os01g01080.1  
AT2G39570 Orysa4|Os05g02220.1  
AT2G36840 Orysa4|Os09g39740.1  
AT5G22770,AT5G22780 Orysa4|Os03g02150.1  
AT2G05170 Orysa4|Os04g31390.1  
Orysa4|Os08g21670.1  
AT3G53260,AT2G37040,AT5G04230,AT3G10340  
Orysa4|Os02g41670.1,Orysa4|Os02g41680.1,Orysa4|Os05g35290.1,Orysa4|Os04g43800.1,Orysa4|Os11  
g48110.1,Orysa4|Os12g33610.1,Orysa4|Os04g43760.1,Orysa4|Os02g41630.1  
AT3G03380 Orysa4|Os02g48180.1  
AT3G22435 Orysa4|Os03g06340.1  
Orysa4|Os01g53100.1,Orysa4|Os03g59370.1  
Orysa4|Os04g53620.1  
AT1G11980 Orysa4|Os10g39590.1  
Orysa4|Os12g17820.1  
AT1G11970 Orysa4|Os10g24870.1  
Orysa4|Os11g18670.1,Orysa4|Os10g33620.1  
AT4G05320 Orysa4|Os06g46770.1,Orysa4|Os02g06640.1,Orysa4|Os05g42424.1  
AT5G20620,AT5G03240  
AT4G05050  
AT3G52590,AT2G36170 Orysa4|Os09g39500.1,Orysa4|Os03g13170.1  
Orysa4|Os10g34990.1  
AT1G53980,AT1G53950  
AT1G53930 Orysa4|Os09g31019.1  
AT5G09340 Orysa4|Os08g08700.1  
AT3G09790  
Orysa4|Os01g45420.1,Orysa4|Os01g45400.1  
AT1G31340 Orysa4|Os09g25320.1  
Orysa4|Os06g44080.1  
AT2G35635  
AT5G37640  
AT1G23410  
AT1G65350,AT4G02890  
Orysa4|Os01g22490.1  
Orysa4|Os07g30640.1  
Orysa4|Os05g38310.1  
Orysa4|Os08g08790.1,Orysa4|Os09g27930.1  
Orysa4|Os10g34960.1  
Orysa4|Os06g46120.1  
AT1G55060  
Orysa4|Os08g08760.1  
AT3G62250,AT2G47110  
AT4G03120  
Orysa4|Os02g16640.1  
AT3G02690 Orysa4|Os10g35140.1  
AT5G03500,AT5G03220 Orysa4|Os04g56640.1  
AT5G53700,AT5G03480,AT3G09160,AT5G05430  
AT3G15920,AT2G25350,AT4G32160 Orysa4|Os06g43560.1  
AT2G26670,AT1G69720,AT1G58300  
AT2G26550 Orysa4|Os03g27770.1  
AT5G02880 Orysa4|Os05g03100.1,Orysa4|Os05g38830.1  
AT4G38600 Orysa4|Os02g01170.1  
AT2G39260 Orysa4|Os02g42040.1  
AT5G53280 Orysa4|Os06g30930.1,Orysa4|Os02g16450.1  
AT3G52870 Orysa4|Os12g05420.1,Orysa4|Os11g05340.1  
AT4G33050,AT2G26190,AT5G57010 Orysa4|Os01g38980.1,Orysa4|Os05g10840.1  
AT3G58480,AT3G13600  
Orysa4|Os07g43970.1,Orysa4|Os03g25760.1,Orysa4|Os03g07110.1,Orysa4|Os10g27170.1  
Orysa4|Os06g10490.1  
AT5G12200 Orysa4|Os01g59340.1  
Orysa4|Os08g40070.1,Orysa4|Os07g44820.1,Orysa4|Os03g24950.1  
AT3G10820,AT5G05140  
Orysa4|Os01g17990.1,Orysa4|Os05g34210.1  
AT1G19600 Orysa4|Os01g01620.1  
AT3G27100 Orysa4|Os01g69110.1  
AT5G04360 Orysa4|Os04g08270.1  
AT3G17350 Orysa4|Os05g33860.1  
AT1G71230,AT1G22920 Orysa4|Os04g56070.1  
AT3G03310  
Orysa4|Os09g33820.1  
AT4G19860  
AT2G35360 Orysa4|Os09g39980.1  
AT1G19840,AT1G75590,AT5G10990,AT4G34750 Orysa4|Os04g56680.1,Orysa4|Os04g56690.1  
Orysa4|Os08g02520.1,Orysa4|Os08g02530.1

AT3G03850,AT3G03830,AT3G03840,AT3G03820,AT5G18020,AT5G18080,AT5G18010,AT5G18030,AT5G18050,AT5G18060,AT2G21200,AT3G03847,AT4G13790,AT4G38850,AT2G21210,AT4G38840,AT4G34790,AT4G34810,AT4G34800,AT4G34770  
AT2G45210,AT3G60690,AT4G12410,AT4G22620 Orysa4|Os02g42990.1  
AT2G36210  
AT5G20810,AT3G43120 Orysa4|Os09g26610.1  
AT1G19830,AT1G75580,AT2G21220,AT4G38860,AT2G16580,AT4G34760,AT4G36110,AT2G18010,AT3G51200,AT5G66260 Orysa4|Os02g24740.1,Orysa4|Os02g24700.1,Orysa4|Os06g04590.1  
AT2G24400,AT4G31320 Orysa4|Os04g51890.1  
AT4G09530  
AT3G20220 Orysa4|Os02g05050.1,Orysa4|Os06g48860.1  
AT4G34780  
Orysa4|Os06g48850.1,Orysa4|Os02g05060.1  
AT5G50760  
Orysa4|Os02g30810.1,Orysa4|Os01g70050.1,Orysa4|Os08g42277.1,Orysa4|Os08g42198.1,Orysa4|Os09g32984.1  
AT3G53250,AT2G37030,AT5G03310 Orysa4|Os04g43740.1  
AT1G56150,AT3G12830,AT1G79130,AT1G16510  
Orysa4|Os02g07110.1,Orysa4|Os06g45950.1,Orysa4|Os12g43110.1,Orysa4|Os03g45800.1,Orysa4|Os04g52670.1,Orysa4|Os06g45970.1  
AT3G09870,AT2G28085  
AT2G46690,AT4G00880,AT3G61900,AT5G53590 Orysa4|Os06g50040.1  
Orysa4|Os02g52990.1  
AT3G17940 Orysa4|Os10g06720.1  
AT3G01260,AT5G15140  
Orysa4|Os02g36600.1,Orysa4|Os04g38530.1,Orysa4|Os04g38540.1,Orysa4|Os03g26430.1  
Orysa4|Os09g02140.1  
AT3G47800  
AT1G08110Orysa4|Os05g22970.1  
Orysa4|Os11g40110.1  
AT1G76350,AT1G20640 Orysa4|Os03g03900.1,Orysa4|Os09g37710.1  
Orysa4|Os05g10380.1  
AT4G24020,AT1G64530 Orysa4|Os01g13540.1  
Orysa4|Os11g16290.1,Orysa4|Os04g41850.1  
AT2G17150,AT4G35270,AT4G38340  
Orysa4|Os02g04340.1  
AT3G59580,AT2G43500  
Orysa4|Os07g05630.1  
AT2G20270,AT4G28730  
Orysa4|Os08g45140.1  
Orysa4|Os01g27140.1,Orysa4|Os01g26912.1,Orysa4|Os05g05730.1,Orysa4|Os01g70990.1,Orysa4|Os12g35340.1,Orysa4|Os11g43550.1,Orysa4|Os11g43580.1,Orysa4|Os11g43530.1,Orysa4|Os11g43520.1,Orysa4|Os12g35330.1  
AT4G15660,AT4G15670,AT4G15690,AT4G15680,AT4G15700,AT5G18600,AT1G03020,AT3G62930,AT2G47870,AT3G62950,AT2G47880,AT3G62960,AT1G06830,AT2G30540  
AT4G33040,AT5G11930 Orysa4|Os01g09830.1,Orysa4|Os05g10930.1  
AT5G63030  
AT5G40370 Orysa4|Os02g40500.1,Orysa4|Os04g42930.1  
AT1G03850,AT1G28480 Orysa4|Os01g47760.1,Orysa4|Os05g48930.1  
AT5G14070,AT3G02000 Orysa4|Os02g30850.1,Orysa4|Os04g32300.1  
AT2G25280 Orysa4|Os05g24580.1  
AT5G54090 Orysa4|Os10g36530.1  
AT1G65070  
Orysa4|Os04g58410.1  
AT2G17660 Orysa4|Os06g17870.1,Orysa4|Os02g49340.1  
Orysa4|Os04g52950.1  
AT5G55850  
AT5G63270,AT3G48450,AT5G40645  
AT2G01770 Orysa4|Os09g23300.1,Orysa4|Os04g38940.1  
Orysa4|Os08g39950.1,Orysa4|Os01g70660.1  
AT2G30070  
Orysa4|Os06g45940.1  
Orysa4|Os08g36340.1,Orysa4|Os09g27580.1  
AT1G70300,AT5G14880 Orysa4|Os06g42030.1,Orysa4|Os02g49760.1  
Orysa4|Os05g27240.1  
AT4G19960  
AT4G23640  
AT1G60160  
AT2G35060,AT1G31120 Orysa4|Os08g10550.1,Orysa4|Os09g38960.1  
AT4G13420  
Orysa4|Os02g31910.1,Orysa4|Os02g31940.1,Orysa4|Os04g32920.1,Orysa4|Os01g70490.1,Orysa4|Os03g37930.1,Orysa4|Os03g37830.1,Orysa4|Os03g37840.1,Orysa4|Os07g01214.1  
Orysa4|Os04g52120.1  
AT5G09400,AT4G33530 Orysa4|Os07g32530.1  
AT2G40540 Orysa4|Os03g21890.1,Orysa4|Os07g48130.1  
AT3G02050 Orysa4|Os07g47350.1,Orysa4|Os01g70940.1,Orysa4|Os01g27170.1  
Orysa4|Os03g55370.1  
AT5G47870 Orysa4|Os09g33790.1  
AT1G71310 Orysa4|Os01g65560.1  
AT5G47760 Orysa4|Os09g08660.1  
AT5G36700,AT5G36790 Orysa4|Os04g41340.1  
Orysa4|Os12g23150.1

AT3G14110Orysa4|Os01g32730.1  
AT5G18120,AT3G03860 Orysa4|Os12g35640.1,Orysa4|Os03g59170.1  
AT5G04240 Orysa4|Os03g05680.1  
AT3G48430  
Orysa4|Os12g28860.1  
Orysa4|Os12g07200.1,Orysa4|Os12g18150.1  
Orysa4|Os03g05480.1  
AT2G39060 Orysa4|Os03g22590.1  
Orysa4|Os02g19820.1  
AT4G25010,AT5G50800,AT3G48740,AT5G23660 Orysa4|Os12g29220.1,Orysa4|Os11g31190.1  
AT5G53190 Orysa4|Os01g12130.1,Orysa4|Os05g12320.1  
AT4G10850,AT1G66770  
AT1G21460 Orysa4|Os05g35140.1,Orysa4|Os01g65880.1  
Orysa4|Os01g21230.1,Orysa4|Os01g40960.1  
AT5G50790  
AT5G13170  
AT5G40260  
AT3G16690,AT4G15920  
AT5G62850,AT3G28007  
Orysa4|Os01g42110.1,Orysa4|Os01g42090.1,Orysa4|Os09g08490.1,Orysa4|Os09g08440.1,Orysa4|Os09g08270.1,Orysa4|Os09g08030.1,Orysa4|Os12g07860.1,Orysa4|Os05g51090.1  
AT3G14770 Orysa4|Os01g50460.1  
Orysa4|Os08g42350.1  
Orysa4|Os03g22200.1  
Orysa4|Os06g06560.1  
AT5G24300  
Orysa4|Os02g51070.1  
Orysa4|Os10g30156.1  
Orysa4|Os06g04200.1  
Orysa4|Os07g13880.1,Orysa4|Os06g12450.1  
AT3G01180  
AT1G32900 Orysa4|Os07g22930.1  
AT3G11950Orysa4|Os07g38850.1  
AT5G19820  
Orysa4|Os10g09740.1  
Orysa4|Os03g49420.1,Orysa4|Os07g38760.1  
AT4G27640 Orysa4|Os03g15540.1  
AT2G27090 Orysa4|Os07g48690.1  
AT4G39790 Orysa4|Os05g16640.1,Orysa4|Os05g07980.1,Orysa4|Os09g20340.1  
AT2G16480 Orysa4|Os10g36810.1  
AT5G23480,AT2G18090 Orysa4|Os05g34790.1  
Orysa4|Os09g36090.1  
AT2G16485  
AT3G51120  
AT2G16470  
AT5G08430,AT5G63700 Orysa4|Os01g66140.1  
Orysa4|Os03g02160.1  
Orysa4|Os10g20680.1  
Orysa4|Os02g21740.1,Orysa4|Os08g30220.1,Orysa4|Os10g06470.1,Orysa4|Os08g11730.1,Orysa4|Os02g27920.1,Orysa4|Os12g29790.1,Orysa4|Os04g15900.1,Orysa4|Os08g11350.1,Orysa4|Os12g23080.1,Orysa4|Os03g21340.1,Orysa4|Os04g08300.1,Orysa4|Os04g04620.1,Orysa4|Os07g33180.1,Orysa4|Os02g29990.1,Orysa4|Os06g32000.1,Orysa4|Os12g19710.1,Orysa4|Os08g17950.1,Orysa4|Os07g45860.1,Orysa4|Os07g45840.1,Orysa4|Os05g19420.1,Orysa4|Os10g06360.1,Orysa4|Os10g06390.1,Orysa4|Os06g14980.1,Orysa4|Os04g18510.1,Orysa4|Os11g12670.1,Orysa4|Os05g34780.1,Orysa4|Os04g24000.1,Orysa4|Os10g08200.1,Orysa4|Os11g24660.1,Orysa4|Os01g34130.1,Orysa4|Os10g18620.1,Orysa4|Os04g12330.1,Orysa4|Os04g30080.1,Orysa4|Os07g16450.1,Orysa4|Os12g11090.1,Orysa4|Os10g11710.1,Orysa4|Os04g07690.1,Orysa4|Os12g11140.1,Orysa4|Os07g16870.1,Orysa4|Os09g24070.1,Orysa4|Os02g16440.1,Orysa4|Os10g06480.1,Orysa4|Os10g11120.1,Orysa4|Os11g01960.1,Orysa4|Os04g22520.1,Orysa4|Os04g31890.1,Orysa4|Os06g24640.1,Orysa4|Os11g15550.1,Orysa4|Os08g11390.1,Orysa4|Os11g27900.1,Orysa4|Os11g31010.1,Orysa4|Os07g14200.1,Orysa4|Os07g22160.1,Orysa4|Os09g17780.1  
Orysa4|Os02g39700.1,Orysa4|Os04g42010.1  
AT4G32720  
AT1G79880  
AT5G64370 Orysa4|Os07g30170.1  
AT2G28020,AT2G28230,AT4G09070 Orysa4|Os09g27140.1  
AT3G02080,AT5G15520,AT5G61170 Orysa4|Os03g31090.1  
AT5G45380 Orysa4|Os10g42960.1  
AT1G23190,AT1G70730  
AT5G51820 Orysa4|Os10g11140.1  
AT5G42910  
AT2G36270  
AT1G45249 Orysa4|Os06g10880.1,Orysa4|Os02g52780.1,Orysa4|Os09g28310.1,Orysa4|Os08g36790.1  
AT1G49720,AT3G19290,AT4G34000  
Orysa4|Os09g36910.1  
AT3G19190 Orysa4|Os06g15700.1  
AT1G68100 Orysa4|Os08g36420.1  
AT2G21170Orysa4|Os09g36450.1  
Orysa4|Os01g62420.1  
AT3G55440 Orysa4|Os01g05490.1  
AT2G22140,AT2G21800 Orysa4|Os04g55500.1  
AT4G33625 Orysa4|Os07g02710.1  
AT1G56590 Orysa4|Os05g31780.1  
AT4G24160 Orysa4|Os09g34860.1

AT5G38840 Orysa4|Os06g16430.1  
AT1G52250,AT3G16120,AT4G27360  
AT1G23220  
AT5G20110Orysa4|Os01g37490.1  
Orysa4|Os04g38880.1,Orysa4|Os02g36990.1  
Orysa4|Os02g50020.1  
AT1G48520 Orysa4|Os11g34210.1  
AT5G55690 Orysa4|Os01g67890.1  
AT1G08830 Orysa4|Os03g22810.1  
Orysa4|Os03g11960.1  
AT2G28190  
AT5G18100  
Orysa4|Os08g44770.1  
AT3G04720 Orysa4|Os11g37970.1,Orysa4|Os11g37950.1,Orysa4|Os11g37940.1,Orysa4|Os11g37930.1  
Orysa4|Os01g65000.1  
Orysa4|Os03g62200.1  
Orysa4|Os02g34580.1  
AT2G38290  
Orysa4|Os01g42740.1,Orysa4|Os11g01410.1,Orysa4|Os05g39240.1,Orysa4|Os01g61510.1,Orysa4|Os01  
g61550.1  
Orysa4|Os12g01420.1  
AT4G33380 Orysa4|Os06g11070.1,Orysa4|Os02g52410.1  
Orysa4|Os02g57170.1  
AT5G47420,AT4G17420 Orysa4|Os03g53600.1  
AT1G25300 Orysa4|Os01g04650.1  
AT5G49920 Orysa4|Os02g52790.1,Orysa4|Os05g35260.1  
Orysa4|Os11g25800.1,Orysa4|Os11g25780.1  
Orysa4|Os11g27390.1,Orysa4|Os03g48520.1,Orysa4|Os02g56480.1,Orysa4|Os07g37040.1,Orysa4|Os04  
g21590.1  
AT3G24715  
AT2G01190,AT3G18230  
AT3G48240,AT5G63130  
AT3G26510,AT1G70640  
AT5G09620,AT5G64430,AT4G05150  
AT5G08630 Orysa4|Os04g35880.1,Orysa4|Os02g35100.1  
AT4G33985,AT2G15610,AT2G15590  
AT1G08790,AT3G04700,AT5G28690 Orysa4|Os02g26170.1,Orysa4|Os04g21340.1  
AT3G50350  
Orysa4|Os02g52770.1  
AT4G03150 Orysa4|Os12g34880.1  
AT2G07771,AT2G07681 Orysa4|Os12g34010.1  
AT1G10500  
AT5G03905  
Orysa4|Os06g05400.1  
AT2G46225 Orysa4|Os05g50800.1,Orysa4|Os01g43420.1  
AT5G47860 Orysa4|Os04g33280.1  
Orysa4|Os09g20530.1,Orysa4|Os10g33980.1,Orysa4|Os11g06520.1,Orysa4|Os07g02030.1,Orysa4|Os07  
g01910.1  
Orysa4|Os11g38910.1  
AT5G01330,AT5G01320,AT4G33070,AT5G54960  
Orysa4|Os07g49250.1,Orysa4|Os03g18220.1,Orysa4|Os01g06660.1  
Orysa4|Os05g39310.1,Orysa4|Os05g39320.1  
AT5G44500,AT4G20440 Orysa4|Os07g07220.1  
AT5G59230,AT1G07480,AT1G07470 Orysa4|Os05g22670.1  
AT4G34720,AT2G16510,AT4G38920,AT1G19910,AT1G75630  
Orysa4|Os11g06890.1,Orysa4|Os05g01560.1,Orysa4|Os02g34510.1  
Orysa4|Os01g73130.1  
Orysa4|Os03g12590.1,Orysa4|Os07g10150.1  
AT4G34450,AT2G16200  
AT3G27110Orysa4|Os01g73910.1  
AT4G24350,AT4G24340  
Orysa4|Os06g02210.1  
AT4G28940 Orysa4|Os01g12940.1,Orysa4|Os05g13970.1  
AT5G17660 Orysa4|Os01g35170.1  
AT1G05940  
Orysa4|Os03g43980.1  
AT3G03720  
AT1G17120 Orysa4|Os06g34830.1  
AT2G34960 Orysa4|Os01g11160.1  
Orysa4|Os04g45950.1  
AT4G21120Orysa4|Os03g43970.1,Orysa4|Os12g41890.1  
Orysa4|Os10g30090.1  
AT3G10600,AT5G04770  
AT1G58030,AT5G36940 Orysa4|Os03g45170.1,Orysa4|Os12g42850.1  
AT3G09030  
AT5G41330 Orysa4|Os07g23720.1  
AT4G34540 Orysa4|Os02g47610.1  
Orysa4|Os01g13590.1  
Orysa4|Os12g16260.1,Orysa4|Os01g13610.1  
Orysa4|Os01g01650.1,Orysa4|Os01g01660.1  
AT4G13660,AT1G32100 Orysa4|Os12g16240.1,Orysa4|Os12g16220.1  
Orysa4|Os06g28550.1



Orysa4|Os01g13600.1  
 AT1G75290,AT1G75280,AT1G75300,AT1G19540,AT4G39230 Orysa4|Os06g27770.1  
 Orysa4|Os12g16250.1,Orysa4|Os12g16290.1  
 Orysa4|Os03g15360.1  
 AT3G06200 Orysa4|Os03g20460.1  
 Orysa4|Os01g62650.1  
 Orysa4|Os12g30520.1,Orysa4|Os11g37090.1  
 AT4G25880 Orysa4|Os09g32210.1,Orysa4|Os08g40830.1  
 AT3G10360 Orysa4|Os02g57390.1  
 AT5G43110,AT5G43090,AT4G08560  
 AT2G29190,AT2G29200,AT2G29140  
 Orysa4|Os04g12480.1  
 Orysa4|Os04g20800.1  
 Orysa4|Os09g20560.1  
 AT5G56510  
 Orysa4|Os09g08730.1,Orysa4|Os04g20774.1  
 Orysa4|Os11g47940.1  
 AT3G20250  
 Orysa4|Os05g01910.1,Orysa4|Os01g74030.1  
 AT1G78160,AT1G22240,AT1G35750,AT1G35730,AT4G08840 Orysa4|Os03g09150.1,Orysa4|Os12g31000.1  
 Orysa4|Os12g38590.1  
 Orysa4|Os03g09300.1  
 AT3G24090 Orysa4|Os12g03720.1  
 AT3G10350 Orysa4|Os02g51100.1  
 AT5G60730  
 AT3G57090 Orysa4|Os01g72280.1,Orysa4|Os05g31770.1  
 AT5G12390  
 AT5G48310 Orysa4|Os02g10490.1  
 AT5G65440  
 AT4G24610 Orysa4|Os02g52280.1  
 AT5G60580,AT3G09760,AT5G03180  
 Orysa4|Os02g06920.1,Orysa4|Os06g46366.1  
 AT5G18760,AT3G06330  
 Orysa4|Os06g23274.1  
 AT1G64385 Orysa4|Os05g49750.1  
 AT3G56040 Orysa4|Os05g39230.1  
 AT2G23890 Orysa4|Os09g25640.1  
 AT3G55420 Orysa4|Os05g38470.1  
 AT3G42630 Orysa4|Os08g40870.1  
 AT2G02880 Orysa4|Os03g26220.1  
 AT1G08980 Orysa4|Os04g02754.1,Orysa4|Os04g02780.1  
 AT3G17970 Orysa4|Os03g50010.1  
 AT5G09420 Orysa4|Os02g51810.1  
 AT3G28730  
 Orysa4|Os01g08970.1,Orysa4|Os05g08970.1  
 AT5G59140 Orysa4|Os11g48030.1  
 AT1G09770 Orysa4|Os04g28090.1  
 AT3G19180 Orysa4|Os04g57920.1  
 AT1G02050,AT4G00040  
 AT4G34850 Orysa4|Os07g22850.1  
 Orysa4|Os10g08680.1  
 Orysa4|Os10g34360.1  
 AT5G13930 Orysa4|Os07g11440.1,Orysa4|Os11g32650.1  
 Orysa4|Os11g32550.1  
 Orysa4|Os04g23940.1,Orysa4|Os11g35930.1,Orysa4|Os01g41834.1  
 Orysa4|Os10g36972.1  
 Orysa4|Os10g07040.1,Orysa4|Os10g08620.1,Orysa4|Os05g12180.1,Orysa4|Os05g12240.1,Orysa4|Os05g12210.1,Orysa4|Os05g12190.1,Orysa4|Os10g09860.1,Orysa4|Os10g08710.1,Orysa4|Os07g31750.1,Orysa4|Os07g31770.1,Orysa4|Os07g34140.1,Orysa4|Os07g34260.1,Orysa4|Os07g17010.1,Orysa4|Os11g32610.1,Orysa4|Os11g32580.1,Orysa4|Os12g07690.1,Orysa4|Os11g32620.1  
 Orysa4|Os11g32540.1  
 AT4G12830 Orysa4|Os01g69060.1  
 AT2G36020  
 Orysa4|Os07g38100.1  
 AT5G42560,AT1G75700,AT1G19950  
 Orysa4|Os03g14610.1,Orysa4|Os10g09870.1,Orysa4|Os03g04030.1,Orysa4|Os02g02920.1,Orysa4|Os09g36340.1  
 Orysa4|Os12g06180.1,Orysa4|Os11g05800.1  
 Orysa4|Os03g04520.1  
 AT2G33440 Orysa4|Os01g72650.1  
 AT2G33435  
 AT1G60830,AT1G60900,AT4G36690 Orysa4|Os11g41820.1,Orysa4|Os11g45590.1  
 AT3G14980 Orysa4|Os04g59510.1,Orysa4|Os04g35430.1  
 AT5G36670,AT5G36740,AT1G05380,AT4G14920 Orysa4|Os07g07690.1,Orysa4|Os03g53630.1  
 Orysa4|Os01g73480.1  
 AT5G58610,AT5G63900  
 AT1G60740,AT1G65970,AT1G65980 Orysa4|Os01g48420.1  
 AT3G52960  
 Orysa4|Os02g09940.1,Orysa4|Os06g42000.1  
 AT3G06050 Orysa4|Os01g16152.1  
 AT2G43410 Orysa4|Os09g34070.1  
 AT5G03940 Orysa4|Os11g05556.1

AT2G45770 Orysa4|Os01g72800.1  
AT3G54420 Orysa4|Os04g41620.1,Orysa4|Os04g41680.1  
Orysa4|Os12g12110.1  
Orysa4|Os12g15490.1  
AT3G12500 Orysa4|Os03g04060.1,Orysa4|Os10g39680.1  
Orysa4|Os06g51060.1,Orysa4|Os06g51050.1,Orysa4|Os05g33140.1,Orysa4|Os05g33130.1,Orysa4|Os05g33150.1  
AT2G43570  
AT3G16920,AT1G05850 Orysa4|Os09g32080.1,Orysa4|Os08g41100.1  
AT1G02360,AT4G01700 Orysa4|Os05g04690.1,Orysa4|Os01g18400.1  
AT2G43620,AT2G43610,AT2G43600,AT1G56680  
Orysa4|Os12g13610.1  
AT2G43590,AT3G47540,AT2G43580  
Orysa4|Os04g41640.1  
Orysa4|Os02g39330.1  
AT5G09270 Orysa4|Os01g64190.1  
AT3G54360 Orysa4|Os01g01420.1,Orysa4|Os02g55200.1  
AT5G09230 Orysa4|Os12g07950.1  
AT2G21530 Orysa4|Os12g03070.1,Orysa4|Os11g03390.1  
AT4G26550,AT5G56020 Orysa4|Os06g40630.1  
AT1G58200 Orysa4|Os03g31839.1  
AT5G10490  
AT3G18610 Orysa4|Os08g33350.1,Orysa4|Os04g52960.1  
AT1G35660 Orysa4|Os01g65320.1  
AT5G06370 Orysa4|Os05g36910.1  
AT5G16360,AT5G16330,AT3G02700  
Orysa4|Os05g24560.1  
AT4G00905,AT1G01225 Orysa4|Os09g35810.1,Orysa4|Os08g43350.1  
Orysa4|Os11g41500.1  
Orysa4|Os07g01450.1  
AT5G41010  
AT1G53690 Orysa4|Os05g05980.1  
AT3G21480  
Orysa4|Os01g71256.1  
AT4G03130 Orysa4|Os05g05440.1  
AT3G52980,AT2G05160  
Orysa4|Os08g03310.1  
Orysa4|Os07g39440.1  
Orysa4|Os12g19370.1  
AT4G32700  
AT4G32695  
AT5G41470 Orysa4|Os03g64380.1  
AT2G22400,AT4G40000 Orysa4|Os09g29630.1,Orysa4|Os08g37780.1  
AT5G07320,AT5G61810,AT5G51050 Orysa4|Os06g40200.1,Orysa4|Os02g10740.1  
Orysa4|Os06g45070.1  
AT3G48630,AT3G44150,AT3G11800 Orysa4|Os03g44560.1  
AT2G15910  
Orysa4|Os03g57320.1  
AT5G08450 Orysa4|Os07g29450.1  
AT3G10060 Orysa4|Os07g09040.1  
AT2G26230 Orysa4|Os01g64520.1  
AT4G06676 Orysa4|Os04g35380.1  
AT3G27440  
AT1G55810,AT4G26510 Orysa4|Os02g17320.1,Orysa4|Os11g16370.1  
Orysa4|Os09g32820.1,Orysa4|Os08g41790.1  
AT3G27190,AT5G40870  
AT1G55300 Orysa4|Os05g28010.1  
AT1G56090 Orysa4|Os04g52580.1  
AT1G29320 Orysa4|Os07g32350.1  
Orysa4|Os01g56350.1  
AT2G34640  
AT1G31600 Orysa4|Os04g51360.1  
AT1G23390,AT3G24760 Orysa4|Os01g50840.1,Orysa4|Os09g12150.1,Orysa4|Os02g26670.1  
AT5G65250 Orysa4|Os08g37820.1  
AT1G16180 Orysa4|Os02g54990.1  
AT3G06170 Orysa4|Os03g34300.1  
Orysa4|Os05g23580.1  
Orysa4|Os09g30090.1  
AT3G49180 Orysa4|Os07g22534.1  
AT5G23290 Orysa4|Os10g34670.1  
AT5G09910,AT5G64813 Orysa4|Os03g13860.1,Orysa4|Os10g04580.1  
AT5G02510 Orysa4|Os01g42420.1  
AT5G32440 Orysa4|Os06g43550.1,Orysa4|Os02g09180.1  
AT1G80040 Orysa4|Os09g03090.1  
AT4G31770 Orysa4|Os03g51540.1  
AT3G06680,AT3G06700 Orysa4|Os05g28750.1  
AT2G48030,AT3G21530 Orysa4|Os03g24610.1,Orysa4|Os07g45100.1  
AT3G10860,AT5G05370 Orysa4|Os06g07969.1,Orysa4|Os06g07869.1  
AT5G44040,AT1G04030,AT2G33400 Orysa4|Os04g43230.1,Orysa4|Os03g04550.1  
Orysa4|Os06g45340.1  
AT3G25220,AT5G48580 Orysa4|Os01g68710.1  
AT5G45680

AT1G58450 Orysa4|Os04g28440.1  
Orysa4|Os09g32526.1  
AT3G25230,AT5G48570 Orysa4|Os02g28980.1,Orysa4|Os04g28420.1  
AT5G64350 Orysa4|Os02g52290.1  
Orysa4|Os01g38359.1,Orysa4|Os01g38180.1  
AT4G39710 Orysa4|Os02g51570.1  
Orysa4|Os03g20980.1  
AT5G18260 Orysa4|Os10g26610.1  
Orysa4|Os07g37180.1  
AT1G11390,AT1G61640  
Orysa4|Os04g56510.1  
AT3G60360 Orysa4|Os01g59500.1  
AT1G63855 Orysa4|Os02g02800.1  
AT5G10800,AT5G25060 Orysa4|Os02g08360.1  
AT3G49990 Orysa4|Os07g44050.1,Orysa4|Os03g25620.1  
AT1G06950 Orysa4|Os10g35030.1,Orysa4|Os10g35010.1  
AT5G51660 Orysa4|Os04g18010.1  
AT3G46780 Orysa4|Os05g22614.1  
AT1G03150 Orysa4|Os03g49230.1  
AT1G04010 Orysa4|Os02g56910.1  
Orysa4|Os03g63650.1  
AT5G20540  
Orysa4|Os04g39940.1  
AT1G54180,AT3G14000 Orysa4|Os09g27220.1  
AT1G31880,AT2G21030,AT2G35600 Orysa4|Os04g51172.1,Orysa4|Os02g47230.1  
AT1G54190 Orysa4|Os09g27230.1,Orysa4|Os08g36020.1  
Orysa4|Os02g19670.1,Orysa4|Os08g44720.1  
Orysa4|Os09g07110.1  
Orysa4|Os11g31260.1,Orysa4|Os11g40380.1,Orysa4|Os12g33140.1,Orysa4|Os02g18740.1,Orysa4|Os03  
g62000.1,Orysa4|Os10g37950.1,Orysa4|Os07g31780.1,Orysa4|Os01g70480.1,Orysa4|Os09g33590.1,Orysa4|Os09g  
38170.1,Orysa4|Os06g50200.1,Orysa4|Os08g09440.1,Orysa4|Os10g11090.1,Orysa4|Os10g37370.1,Orysa4|Os02g4  
4460.1,Orysa4|Os08g12900.1,Orysa4|Os08g35300.1,Orysa4|Os01g26960.1,Orysa4|Os01g26848.1,Orysa4|Os01g54  
280.1,Orysa4|Os01g05330.1,Orysa4|Os07g35630.1,Orysa4|Os02g26760.1,Orysa4|Os11g25050.1,Orysa4|Os04g509  
00.1,Orysa4|Os11g18720.1,Orysa4|Os07g22760.1,Orysa4|Os02g07860.1,Orysa4|Os02g50870.1,Orysa4|Os02g3205  
0.1,Orysa4|Os12g31630.1,Orysa4|Os09g02040.1,Orysa4|Os02g18530.1,Orysa4|Os09g18070.1,Orysa4|Os05g14480.  
1,Orysa4|Os03g29330.1,Orysa4|Os03g41160.1,Orysa4|Os04g10720.1,Orysa4|Os03g56170.1,Orysa4|Os06g16600.1,  
Orysa4|Os11g03360.1,Orysa4|Os10g29450.1,Orysa4|Os03g39190.1,Orysa4|Os04g13430.1,Orysa4|Os01g09330.1,O  
rysa4|Os04g41170.1,Orysa4|Os01g37860.1,Orysa4|Os10g10060.1,Orysa4|Os03g62050.1,Orysa4|Os12g09520.1,Ory  
sa4|Os06g09530.1,Orysa4|Os02g29810.1,Orysa4|Os03g31440.1,Orysa4|Os10g29430.1,Orysa4|Os01g57170.1,Ory  
sa4|Os08g38680.1,Orysa4|Os05g50030.1,Orysa4|Os11g08530.1,Orysa4|Os09g29620.1,Orysa4|Os12g09450.1  
Orysa4|Os02g54480.1,Orysa4|Os01g27640.1,Orysa4|Os07g11620.1,Orysa4|Os06g18130.1,Orysa4|Os01  
g73662.1,Orysa4|Os07g38450.1,Orysa4|Os05g14280.1,Orysa4|Os06g21680.1,Orysa4|Os12g34030.1,Orysa4|Os02g  
31310.1,Orysa4|Os05g39340.1  
Orysa4|Os05g23120.1,Orysa4|Os07g29130.1,Orysa4|Os01g45740.1,Orysa4|Os11g30660.1,Orysa4|Os05  
g47910.1,Orysa4|Os03g42270.1,Orysa4|Os11g25210.1,Orysa4|Os02g06750.1  
AT3G45755 Orysa4|Os10g31300.1  
Orysa4|Os12g29890.1  
AT2G27290 Orysa4|Os04g33940.1  
AT3G19820  
Orysa4|Os10g25780.1  
Orysa4|Os03g12860.1,Orysa4|Os10g01470.1  
AT5G06710  
Orysa4|Os02g35770.1  
Orysa4|Os01g59009.1,Orysa4|Os05g50130.1,Orysa4|Os09g38890.1  
AT1G70920,AT2G01430  
Orysa4|Os09g27450.1,Orysa4|Os08g36220.1  
Orysa4|Os02g05640.1,Orysa4|Os06g48290.1  
AT4G16780,AT5G47370,AT4G17460,AT3G60390,AT2G44910 Orysa4|Os04g46350.1  
AT2G22800,AT4G37790  
Orysa4|Os01g45570.1  
Orysa4|Os06g04850.1,Orysa4|Os06g04870.1,Orysa4|Os10g39720.1,Orysa4|Os10g41230.1  
AT5G27390 Orysa4|Os07g45300.1  
AT2G13810 Orysa4|Os03g09910.1  
AT4G33680 Orysa4|Os03g18810.1  
AT3G26720  
AT5G66150 Orysa4|Os10g05069.1  
AT5G13980 Orysa4|Os11g32260.1  
AT1G48360 Orysa4|Os06g07490.1  
Orysa4|Os06g49110.1  
AT1G69740,AT1G44318  
Orysa4|Os10g07998.1,Orysa4|Os05g28930.1,Orysa4|Os12g18960.1,Orysa4|Os10g12500.1,Orysa4|Os10  
g12400.1,Orysa4|Os08g31130.1,Orysa4|Os10g12190.1  
AT3G56620,AT2G40900  
Orysa4|Os09g25800.1  
AT4G30420,AT4G28040 Orysa4|Os09g25770.1,Orysa4|Os09g25810.1  
AT5G13670,AT4G24980  
AT1G75500 Orysa4|Os08g44750.1  
AT1G11460,AT1G11450,AT1G01070,AT4G01430,AT4G01450,AT4G01440,AT3G30340  
Orysa4|Os06g01966.1,Orysa4|Os02g01326.1,Orysa4|Os06g01972.1,Orysa4|Os06g01840.1,Orysa4|Os04  
g38430.1,Orysa4|Os04g34490.1  
AT4G19185,AT5G45370,AT3G45870 Orysa4|Os02g47500.1  
AT5G40240,AT5G40230,AT4G15540,AT3G28050,AT3G28070,AT3G28100,AT3G28080,AT3G28130,AT5G40210,AT3

G28060,AT1G60050,AT1G70260  
Orysa4|Os04g59120.1  
Orysa4|Os02g02310.1  
AT1G68170,AT1G25270  
AT1G09380 Orysa4|Os01g19240.1,Orysa4|Os01g19290.1  
AT5G07050 Orysa4|Os01g58910.1,Orysa4|Os05g41420.1,Orysa4|Os05g33900.1  
AT5G47470,AT4G16620 Orysa4|Os07g30210.1,Orysa4|Os11g37720.1,Orysa4|Os06g01660.1  
AT2G39510,AT2G37450,AT2G37460  
AT4G08290 Orysa4|Os02g52930.1,Orysa4|Os10g14920.1  
AT3G18200 Orysa4|Os02g22680.1,Orysa4|Os01g02870.1  
Orysa4|Os01g36580.1,Orysa4|Os07g34070.1,Orysa4|Os07g34340.1,Orysa4|Os07g34110.1,Orysa4|Os01  
g36590.1  
Orysa4|Os10g12390.1,Orysa4|Os11g04140.1,Orysa4|Os09g25784.1  
AT1G21890,AT4G08300,AT1G44800  
AT5G64700 Orysa4|Os12g03920.1,Orysa4|Os12g33300.1,Orysa4|Os11g04130.1,Orysa4|Os01g10970.1,Orysa4|Os01  
g10980.1,Orysa4|Os05g01570.1,Orysa4|Os05g01580.1  
AT3G53210  
Orysa4|Os04g34530.1  
AT1G43650  
AT2G24270 Orysa4|Os08g34210.1  
AT4G28005,AT5G52840 Orysa4|Os03g19890.1  
AT5G13690  
Orysa4|Os04g55730.1  
AT1G12250  
Orysa4|Os02g42960.1  
AT3G11670,Orysa4|Os11g05990.1  
Orysa4|Os03g16140.1  
AT4G00550 Orysa4|Os03g11560.1  
Orysa4|Os02g33580.1,Orysa4|Os04g34000.1  
AT4G00150,AT2G45160,AT3G60630,AT4G36710  
Orysa4|Os02g44360.1,Orysa4|Os02g44370.1,Orysa4|Os04g46860.1,Orysa4|Os10g40390.1,Orysa4|Os06  
g01620.1  
Orysa4|Os03g18580.1,Orysa4|Os03g18570.1,Orysa4|Os05g27940.1  
AT3G02560,AT5G16130,AT1G48830  
Orysa4|Os02g21900.1  
AT5G53770 Orysa4|Os01g48210.1  
AT1G15740 Orysa4|Os02g39970.1,Orysa4|Os04g42470.1  
AT4G19040,AT5G45560 Orysa4|Os10g31770.1  
Orysa4|Os02g01270.1,Orysa4|Os06g02590.1  
AT5G25020,AT5G24990,AT5G25010,AT5G10750  
Orysa4|Os01g35920.1  
AT3G54800,AT2G28320 Orysa4|Os10g33930.1  
Orysa4|Os06g48320.1  
AT5G35180 Orysa4|Os08g34060.1  
AT1G06050  
AT1G32730 Orysa4|Os08g03550.1  
AT5G13140,AT3G26960,AT5G41050 Orysa4|Os09g32988.1,Orysa4|Os12g28770.1  
AT5G65750,AT3G55410 Orysa4|Os04g32020.1,Orysa4|Os07g49520.1  
AT3G15095 Orysa4|Os06g24540.1  
Orysa4|Os03g60140.1  
AT5G05230,AT2G40640  
AT3G19895 Orysa4|Os02g58280.1  
AT4G26300,AT1G66530 Orysa4|Os01g06510.1,Orysa4|Os05g07030.1  
AT1G06240 Orysa4|Os01g11590.1  
AT4G14830,AT3G22530 Orysa4|Os01g18010.1,Orysa4|Os03g06390.1,Orysa4|Os07g07670.1  
AT4G20360 Orysa4|Os02g38210.1  
AT4G02930 Orysa4|Os03g63410.1  
AT5G14460 Orysa4|Os05g01750.1  
AT5G13800 Orysa4|Os06g24730.1  
AT4G04770,AT5G44316  
Orysa4|Os01g61400.1  
AT2G44520 Orysa4|Os01g34390.1  
AT1G27380 Orysa4|Os11g28310.1  
AT5G16490 Orysa4|Os03g63060.1,Orysa4|Os01g68890.1  
AT2G30570 Orysa4|Os05g43310.1,Orysa4|Os01g56680.1  
AT3G10220 Orysa4|Os04g59560.1  
AT1G65320 Orysa4|Os08g41740.1,Orysa4|Os01g69090.1  
AT5G28840 Orysa4|Os11g37890.1,Orysa4|Os10g28200.1  
Orysa4|Os02g58530.1,Orysa4|Os11g28610.1  
AT3G51490  
AT1G20840  
AT4G35300 Orysa4|Os02g13560.1,Orysa4|Os10g39440.1  
Orysa4|Os10g13460.1,Orysa4|Os10g13440.1,Orysa4|Os03g03680.1  
AT1G72070  
AT1G80920 Orysa4|Os06g44160.1  
Orysa4|Os06g45980.1  
AT1G30680  
AT1G30660  
Orysa4|Os12g37390.1  
AT1G56420  
AT1G12530 Orysa4|Os03g12720.1

AT1G01220  
Orysa4|Os03g02410.1  
AT5G53330 Orysa4|Os06g06530.1  
AT2G27230 Orysa4|Os01g64560.1  
Orysa4|Os11g06010.1,Orysa4|Os12g06330.1  
AT1G64625  
Orysa4|Os02g45170.1  
AT1G19485 Orysa4|Os07g27140.1,Orysa4|Os01g63910.1,Orysa4|Os02g20440.1  
AT5G14020 Orysa4|Os11g31570.1  
Orysa4|Os04g44530.1  
AT1G73390,AT1G17940 Orysa4|Os02g58160.1  
AT5G23590 Orysa4|Os03g04400.1  
AT1G78800  
Orysa4|Os04g49960.1  
AT3G27340 Orysa4|Os01g67730.1,Orysa4|Os02g10430.1  
AT3G10630 Orysa4|Os09g12530.1  
AT3G14280 Orysa4|Os10g25150.1  
Orysa4|Os04g35540.1  
Orysa4|Os01g71700.1,Orysa4|Os01g71710.1,Orysa4|Os01g71740.1,Orysa4|Os01g71760.1,Orysa4|Os01  
g71720.1  
AT2G01170Orysa4|Os01g42234.1  
AT5G66230,AT3G51230 Orysa4|Os10g42660.1  
AT3G09580 Orysa4|Os07g43370.1  
AT1G79830 Orysa4|Os05g48620.1  
AT1G70070 Orysa4|Os02g50560.1  
AT2G04560 Orysa4|Os01g54900.1  
AT5G66470 Orysa4|Os05g49220.1  
AT1G62640  
Orysa4|Os04g55060.1  
AT3G06820,AT1G80210 Orysa4|Os05g46490.1  
AT1G25580 Orysa4|Os06g15690.1  
AT3G01600,AT5G14490  
AT5G56620 Orysa4|Os05g10620.1,Orysa4|Os01g09550.1  
AT4G29230  
Orysa4|Os06g36480.1  
AT4G28500 Orysa4|Os05g48850.1  
AT1G28470  
Orysa4|Os04g40140.1  
AT2G45030,AT1G45332 Orysa4|Os03g36780.1  
AT1G62750 Orysa4|Os04g45490.1  
AT1G55820,AT3G13222  
Orysa4|Os09g08670.1  
AT3G07660 Orysa4|Os09g08680.1  
Orysa4|Os01g02020.1  
AT5G47720,AT5G48230 Orysa4|Os09g07830.1  
Orysa4|Os10g39150.1  
AT1G52220 Orysa4|Os01g55570.1  
AT2G46820 Orysa4|Os09g07630.1,Orysa4|Os07g28610.1  
AT2G19750,AT5G56670,AT4G29390 Orysa4|Os06g07580.1  
AT5G08020,AT5G61000 Orysa4|Os03g11540.1  
AT5G45400,AT4G19130  
AT2G06510 Orysa4|Os02g53680.1  
Orysa4|Os05g02030.1,Orysa4|Os05g02040.1  
AT5G10680,AT5G10720 Orysa4|Os06g44410.1  
Orysa4|Os01g10130.1  
Orysa4|Os01g10140.1  
AT2G19910,AT2G19920,AT2G19930  
AT5G24930,AT2G24790,AT5G57660  
Orysa4|Os04g42020.1,Orysa4|Os02g39710.1,Orysa4|Os02g08150.1  
AT3G02380,AT5G15840,AT5G15850 Orysa4|Os06g16370.1  
Orysa4|Os08g15050.1,Orysa4|Os09g06464.1  
Orysa4|Os07g15770.1,Orysa4|Os10g41100.1  
AT1G23020,AT1G01590,AT1G01580,AT5G23990,AT5G23980 Orysa4|Os04g48930.1  
AT5G50160  
AT5G49740,AT5G49730 Orysa4|Os04g36720.1  
AT4G28240 Orysa4|Os07g37290.1  
AT2G35490 Orysa4|Os10g42500.1  
Orysa4|Os09g04790.1  
AT4G04020,AT4G22240  
AT2G03690 Orysa4|Os05g09650.1,Orysa4|Os04g57790.1  
AT3G06810  
Orysa4|Os07g47820.1  
AT1G54140 Orysa4|Os07g42150.1,Orysa4|Os03g29470.1  
Orysa4|Os01g37520.1  
AT3G53860,AT2G31600,AT1G05860 Orysa4|Os05g23840.1  
Orysa4|Os12g12950.1  
AT3G30775,AT5G38710 Orysa4|Os10g40360.1  
AT4G05110,AT4G05120,AT4G05130,AT4G05140,AT1G61630  
AT3G09990  
AT1G70330 Orysa4|Os08g10450.1  
Orysa4|Os07g37130.1,Orysa4|Os07g37110.1  
Orysa4|Os07g37100.1

AT3G18940 Orysa4|Os03g55784.1  
AT5G01015 Orysa4|Os11g02820.1  
Orysa4|Os11g27540.1  
AT1G65295 Orysa4|Os01g68840.1  
AT2G47590 Orysa4|Os03g22330.1  
AT3G26680 Orysa4|Os04g32930.1  
AT2G45700  
Orysa4|Os09g26760.1  
AT3G04620 Orysa4|Os12g30550.1  
AT1G29250,AT2G34160 Orysa4|Os01g07810.1  
Orysa4|Os02g10810.1,Orysa4|Os06g40040.1  
AT2G40620  
Orysa4|Os04g41820.1  
AT1G06850 Orysa4|Os07g48180.1  
AT4G38900,AT2G21230 Orysa4|Os10g38820.1,Orysa4|Os03g03550.1  
AT1G43700 Orysa4|Os12g06520.1  
Orysa4|Os03g45350.1,Orysa4|Os04g10310.1  
Orysa4|Os08g43090.1  
AT2G31370,AT1G06070 Orysa4|Os09g34060.1  
AT2G12940,AT2G13150,AT2G12900,AT2G21235,AT2G24340 Orysa4|Os09g34880.1,Orysa4|Os04g10260.1  
AT1G07590 Orysa4|Os08g06500.1  
AT1G15480,AT1G80270,AT3G15590 Orysa4|Os12g07260.1,Orysa4|Os01g17320.1  
Orysa4|Os07g12140.1  
AT1G79050 Orysa4|Os03g43850.1  
Orysa4|Os11g19720.1  
AT3G10140 Orysa4|Os01g71690.1  
AT2G19490,AT3G32920 Orysa4|Os01g67510.1  
AT4G23660  
Orysa4|Os08g29970.1,Orysa4|Os08g29910.1  
AT5G28640 Orysa4|Os03g52320.1  
Orysa4|Os11g40100.1  
Orysa4|Os12g40480.1  
AT2G13690 Orysa4|Os07g15600.1,Orysa4|Os04g20920.1,Orysa4|Os12g08720.1  
AT3G50780 Orysa4|Os03g55950.1  
AT5G60050  
AT1G63850 Orysa4|Os04g49060.1  
Orysa4|Os08g02180.1  
AT2G41230  
AT3G59900,AT2G44080  
Orysa4|Os05g32150.1,Orysa4|Os01g72590.1,Orysa4|Os05g34530.1,Orysa4|Os04g36670.1,Orysa4|Os12  
g10750.1  
Orysa4|Os01g43640.1  
AT1G64220,AT5G41685  
Orysa4|Os03g09210.1  
AT2G33220,AT1G04630  
AT3G13410 Orysa4|Os11g03380.1,Orysa4|Os12g03060.1  
AT5G12410 Orysa4|Os11g36060.1  
Orysa4|Os11g34820.1  
AT1G03650 Orysa4|Os10g35680.1  
Orysa4|Os04g48370.1  
Orysa4|Os01g73430.1,Orysa4|Os02g05880.1  
AT2G40030  
AT1G63020  
AT1G63900 Orysa4|Os07g45350.1  
AT1G59560 Orysa4|Os03g24480.1,Orysa4|Os03g24500.1  
AT5G48950  
AT1G48320 Orysa4|Os05g04660.1,Orysa4|Os03g48480.1  
AT1G08450 Orysa4|Os05g43170.1,Orysa4|Os01g67054.1  
AT1G09210,AT1G56340 Orysa4|Os08g44670.1,Orysa4|Os03g61670.1,Orysa4|Os07g14270.1  
AT3G19450,AT4G34230  
Orysa4|Os04g15920.1  
Orysa4|Os11g01980.1  
AT1G72680 Orysa4|Os10g11810.1,Orysa4|Os11g40690.1  
AT2G21890,AT2G21730,AT4G39330,AT4G37990,AT4G37980,AT4G37970  
Orysa4|Os09g23550.1,Orysa4|Os09g23540.1,Orysa4|Os09g23560.1,Orysa4|Os09g23530.1,Orysa4|Os03  
g12270.1,Orysa4|Os08g16910.1,Orysa4|Os04g52280.1  
AT4G26770  
AT4G22340,AT1G62430 Orysa4|Os10g17990.1,Orysa4|Os01g55360.1  
AT4G39840 Orysa4|Os08g31760.1,Orysa4|Os09g20540.1  
AT1G68800,AT3G18550 Orysa4|Os03g49880.1  
AT4G34640,AT4G34650 Orysa4|Os07g10130.1,Orysa4|Os03g59040.1  
AT4G29250 Orysa4|Os03g53360.1  
AT1G76060 Orysa4|Os03g04380.1  
AT5G55660,AT4G26630 Orysa4|Os03g40010.1  
Orysa4|Os03g29960.1  
AT3G48710,AT5G63550 Orysa4|Os01g70020.1  
AT5G64650,AT5G09770 Orysa4|Os05g38580.1,Orysa4|Os01g62210.1  
Orysa4|Os03g38540.1  
Orysa4|Os06g02610.1,Orysa4|Os06g03740.1  
Orysa4|Os07g34610.1  
AT2G20830  
AT5G25754,AT5G25757 Orysa4|Os01g12870.1,Orysa4|Os05g13950.1

AT4G11120 Orysa4|Os08g30884.1  
Orysa4|Os07g34880.1, Orysa4|Os01g47710.1, Orysa4|Os05g48990.1  
AT3G18010, AT2G01500  
Orysa4|Os01g62310.1  
AT5G05770, AT3G11260 Orysa4|Os01g63510.1  
AT5G17810, AT3G03660  
AT2G33880, AT5G45980  
AT2G28610  
Orysa4|Os07g48560.1, Orysa4|Os03g20910.1, Orysa4|Os08g14400.1  
AT5G46010  
AT1G49870 Orysa4|Os03g40780.1  
AT5G43330, AT1G04410 Orysa4|Os10g33800.1  
AT5G56720 Orysa4|Os04g46560.1  
AT3G20430 Orysa4|Os01g37842.1  
AT1G74990  
AT4G28270, AT4G03510, AT4G27470 Orysa4|Os04g44820.1, Orysa4|Os02g42690.1  
AT2G23780, AT1G19310 Orysa4|Os03g47500.1, Orysa4|Os12g43930.1, Orysa4|Os01g56070.1  
AT4G25290 Orysa4|Os09g36240.1  
AT4G29660  
Orysa4|Os05g46280.1  
AT2G25320, AT2G25330 Orysa4|Os02g39990.1  
AT1G68910, AT5G11390 Orysa4|Os05g15140.1  
AT3G12010 Orysa4|Os10g26140.1  
AT2G45690 Orysa4|Os02g03070.1  
AT1G72550 Orysa4|Os05g48510.1  
AT5G57700 Orysa4|Os07g33220.1  
AT3G51010 Orysa4|Os05g03540.1  
AT5G31412 Orysa4|Os01g68200.1  
AT5G33406  
AT3G22220  
Orysa4|Os10g03230.1  
Orysa4|Os08g19870.1  
AT1G79740 Orysa4|Os01g12280.1  
AT3G17450  
Orysa4|Os09g32380.1  
AT4G15020  
AT1G36095 Orysa4|Os01g36670.1  
AT1G43260  
Orysa4|Os05g24790.1  
Orysa4|Os10g03220.1, Orysa4|Os05g26040.1, Orysa4|Os01g52430.1, Orysa4|Os05g16730.1, Orysa4|Os12g35120.1, Orysa4|Os01g28200.1, Orysa4|Os12g35220.1, Orysa4|Os12g35250.1, Orysa4|Os10g40240.1, Orysa4|Os11g30590.1  
AT3G13030, AT3G13020, AT3G13010 Orysa4|Os06g49050.1  
AT4G23840 Orysa4|Os05g12140.1  
AT3G59380 Orysa4|Os09g33930.1  
AT3G51430, AT3G51440, AT3G51450, AT3G51420 Orysa4|Os10g39710.1  
AT3G57790 Orysa4|Os09g31270.1  
AT5G02790, AT5G02780 Orysa4|Os03g17470.1, Orysa4|Os03g17480.1, Orysa4|Os03g17460.1  
AT3G55040  
AT1G16860, AT1G78880 Orysa4|Os08g13350.1  
Orysa4|Os06g43020.1  
Orysa4|Os11g47800.1  
AT1G07620  
Orysa4|Os03g58540.1  
AT5G18570  
AT5G06550 Orysa4|Os11g36450.1  
AT5G35520 Orysa4|Os02g40680.1  
AT5G66960  
AT1G50380  
AT1G69020 Orysa4|Os09g29950.1  
AT2G32970 Orysa4|Os02g53210.1  
Orysa4|Os05g51860.1  
AT2G19640 Orysa4|Os08g10470.1  
Orysa4|Os04g58620.1  
AT4G00640  
AT4G04850 Orysa4|Os12g42300.1  
AT1G01790, AT4G00630  
Orysa4|Os02g01440.1  
AT3G47450  
AT1G78560  
AT2G26900  
Orysa4|Os04g31210.1  
AT3G48195 Orysa4|Os01g36870.1  
AT4G19180 Orysa4|Os10g21000.1  
AT5G63010 Orysa4|Os05g13680.1, Orysa4|Os04g42880.1  
AT4G12590 Orysa4|Os09g32220.1  
AT5G48750, AT3G59070, AT4G17280, AT5G47530, AT5G35735  
AT3G07570 Orysa4|Os04g41810.1, Orysa4|Os01g67030.1  
Orysa4|Os08g24790.1  
AT3G61750 Orysa4|Os01g48850.1  
Orysa4|Os01g66900.1  
AT3G07390 Orysa4|Os08g41290.1

AT2G04850 Orysa4|Os03g09850.1  
Orysa4|Os03g09880.1,Orysa4|Os03g09900.1  
AT4G12980,AT3G25290 Orysa4|Os09g32470.1,Orysa4|Os08g41280.1  
AT5G47090 Orysa4|Os06g04780.1  
AT5G50010 Orysa4|Os03g27390.1  
AT1G49820 Orysa4|Os04g57400.1  
AT4G10650 Orysa4|Os10g42170.1  
AT2G41670 Orysa4|Os11g26030.1  
Orysa4|Os01g38700.1,Orysa4|Os01g38780.1,Orysa4|Os01g38710.1,Orysa4|Os01g38720.1,Orysa4|Os01g38760.1,Orysa4|Os07g43850.1,Orysa4|Os07g43840.1,Orysa4|Os07g43830.1,Orysa4|Os01g38690.1  
AT3G62240,AT2G47090 Orysa4|Os05g19970.1  
AT3G06580 Orysa4|Os03g61710.1  
AT5G10860 Orysa4|Os03g52690.1  
Orysa4|Os01g44360.1  
AT5G25480 Orysa4|Os01g42630.1  
AT1G78690 Orysa4|Os04g57150.1  
AT4G14180  
Orysa4|Os04g28020.1  
AT2G48100  
AT3G15080 Orysa4|Os08g28980.1  
AT3G27970,AT5G40310 Orysa4|Os02g47920.1  
AT4G27700 Orysa4|Os09g36040.1  
AT1G67040 Orysa4|Os05g47790.1,Orysa4|Os01g04160.1  
AT1G07060 Orysa4|Os11g01540.1  
Orysa4|Os03g52640.1  
AT3G28460  
AT4G05220,AT1G61760 Orysa4|Os11g37680.1,Orysa4|Os04g53650.1,Orysa4|Os07g34720.1  
Orysa4|Os11g03230.1,Orysa4|Os12g02980.1,Orysa4|Os12g03030.1,Orysa4|Os11g03290.1,Orysa4|Os11g03270.1,Orysa4|Os11g25330.1  
AT3G04080,AT5G18280 Orysa4|Os07g48430.1  
Orysa4|Os04g47400.1  
AT4G38420,AT4G28090  
AT5G48450 Orysa4|Os01g01030.1  
AT4G22010  
Orysa4|Os06g46500.1  
AT1G21860,AT1G21850,AT1G76160,AT1G41830  
AT1G75790  
Orysa4|Os06g01490.1,Orysa4|Os10g36390.1,Orysa4|Os08g05820.1  
AT5G66920,AT4G37160,AT2G23630 Orysa4|Os07g02840.1,Orysa4|Os07g02810.1  
AT3G13390,AT1G55570,AT3G13400,AT1G55560 Orysa4|Os05g40740.1,Orysa4|Os01g60080.1  
AT5G51480,AT4G25240,AT4G12420  
AT3G49320,AT5G41970 Orysa4|Os02g46150.1  
AT1G13690 Orysa4|Os03g40310.1  
AT4G22980  
AT4G37100,AT2G23520,AT5G66950 Orysa4|Os12g40010.1,Orysa4|Os03g55704.1  
AT5G51920 Orysa4|Os08g43180.1  
Orysa4|Os03g18960.1  
Orysa4|Os04g03220.1  
Orysa4|Os11g44610.1,Orysa4|Os11g44680.1,Orysa4|Os11g44630.1,Orysa4|Os12g36920.1,Orysa4|Os12g36940.1,Orysa4|Os03g56660.1,Orysa4|Os11g44170.1,Orysa4|Os11g44340.1,Orysa4|Os11g44310.1,Orysa4|Os12g36110.1,Orysa4|Os12g36910.1  
AT1G73800  
AT4G25800,AT5G57580,AT2G18750 Orysa4|Os04g36660.1,Orysa4|Os02g35470.1,Orysa4|Os02g08120.1  
AT5G26920  
AT1G73805  
Orysa4|Os09g13890.1,Orysa4|Os08g27170.1  
AT5G62570 Orysa4|Os03g60890.1,Orysa4|Os03g32160.1  
AT2G24300,AT4G31000  
Orysa4|Os01g04280.1  
Orysa4|Os11g44700.1  
AT3G15390 Orysa4|Os02g42670.1  
AT5G58720 Orysa4|Os01g12530.1  
AT3G29420 Orysa4|Os05g14580.1  
AT4G38460 Orysa4|Os02g44780.1  
Orysa4|Os01g14630.1  
AT2G23800,AT2G18640,AT1G49530,AT3G20160,AT3G29430,AT3G32040,AT3G14530,AT3G14550,AT3G14510,AT2G18620,AT4G36810  
Orysa4|Os07g39270.1  
AT2G24590,AT4G31580,AT1G23860 Orysa4|Os02g54770.1,Orysa4|Os02g39720.1  
AT4G21020,AT5G44310 Orysa4|Os04g52110.1  
AT3G17520  
Orysa4|Os03g20680.1  
AT2G42560  
AT3G53040  
AT3G15280 Orysa4|Os02g15250.1  
Orysa4|Os03g07180.1  
AT2G18340,AT4G36600  
AT5G51840 Orysa4|Os10g11060.1  
AT4G23470  
Orysa4|Os03g03180.1,Orysa4|Os10g39100.1  
AT5G41390,AT1G63830  
AT1G76780



AT3G05900 Orysa4|Os01g71040.1  
Orysa4|Os01g56660.1  
Orysa4|Os03g60170.1  
Orysa4|Os01g39000.1  
Orysa4|Os06g36050.1  
AT4G37820,AT2G22795,AT4G33740 Orysa4|Os03g51640.1,Orysa4|Os03g56200.1  
AT5G40450  
AT2G12875  
AT1G68290 Orysa4|Os01g03740.1  
AT1G11190 Orysa4|Os04g54390.1  
AT4G21590,AT4G21600,AT4G21585 Orysa4|Os04g55850.1  
Orysa4|Os01g33800.1  
Orysa4|Os01g33840.1  
AT1G65280  
Orysa4|Os01g70060.1  
AT5G65180,AT5G10060 Orysa4|Os04g54420.1  
Orysa4|Os11g03570.1,Orysa4|Os12g03340.1  
AT3G26990  
AT1G16970 Orysa4|Os07g08729.1  
AT5G24030,AT4G27970 Orysa4|Os05g50770.1  
Orysa4|Os05g13320.1,Orysa4|Os01g28840.1,Orysa4|Os07g08350.1  
Orysa4|Os01g12680.1  
Orysa4|Os06g08970.1,Orysa4|Os02g32814.1  
AT1G62280 Orysa4|Os05g18670.1,Orysa4|Os01g14520.1  
AT1G12480 Orysa4|Os04g48530.1  
AT4G22360 Orysa4|Os08g39310.1  
AT1G11400 Orysa4|Os03g15560.1  
AT3G27930 Orysa4|Os05g50210.1,Orysa4|Os05g50200.1  
AT1G71090 Orysa4|Os08g09190.1  
AT5G01990 Orysa4|Os01g60230.1,Orysa4|Os05g40330.1  
AT1G14710 Orysa4|Os10g02760.1,Orysa4|Os05g04720.1,Orysa4|Os03g13560.1  
AT2G36230 Orysa4|Os05g33260.1  
AT5G28060,AT3G04920 Orysa4|Os01g52490.1,Orysa4|Os06g36160.1,Orysa4|Os02g13530.1  
AT4G13220 Orysa4|Os12g17830.1  
Orysa4|Os11g34150.1  
AT5G13340 Orysa4|Os10g15390.1  
AT5G18110 Orysa4|Os03g15590.1  
AT4G18040 Orysa4|Os01g73880.1  
AT5G35620 Orysa4|Os10g32970.1  
AT1G29590,AT1G29550  
AT4G30820 Orysa4|Os06g07480.1  
Orysa4|Os03g53760.1  
AT2G35920  
AT1G06670,AT2G30800  
AT1G48650,AT2G01130  
AT5G04895  
AT1G58050,AT1G58060 Orysa4|Os04g35260.1  
Orysa4|Os01g56190.1  
Orysa4|Os04g53680.1  
AT3G63120 Orysa4|Os05g33040.1  
AT3G60550,AT2G45080 Orysa4|Os04g46660.1  
AT3G05327  
AT3G21870  
AT2G44740,AT5G07450,AT5G61650 Orysa4|Os02g43550.1,Orysa4|Os10g41430.1  
AT5G01470 Orysa4|Os03g61140.1  
AT1G27100,AT1G69890,AT1G59710 Orysa4|Os03g58740.1,Orysa4|Os07g09384.1  
AT3G28630,AT3G01311  
AT1G69900  
Orysa4|Os05g43050.1  
AT2G46030  
AT5G41340,AT1G63800  
AT5G25760 Orysa4|Os02g42314.1  
Orysa4|Os04g49130.1  
AT3G20060,AT1G50490 Orysa4|Os01g16650.1  
Orysa4|Os01g60410.1,Orysa4|Os01g60360.1,Orysa4|Os04g57220.1  
AT1G36340  
AT5G05080 Orysa4|Os06g45000.1  
AT5G41700  
AT2G32790  
AT3G08690  
Orysa4|Os01g46926.1  
Orysa4|Os06g30970.1  
Orysa4|Os02g48920.1,Orysa4|Os02g48950.1,Orysa4|Os02g48910.1  
AT2G16740 Orysa4|Os02g02830.1  
AT3G24515 Orysa4|Os01g42040.1  
AT5G59300  
Orysa4|Os01g46920.1  
AT5G62540  
AT3G08700  
AT4G27960  
AT1G78870,AT1G16890 Orysa4|Os01g48280.1  
AT3G46460 Orysa4|Os05g38550.1,Orysa4|Os01g62244.1

AT3G57870  
AT1G64230 Orysa4|Os02g16040.1  
AT2G18600 Orysa4|Os09g15320.1,Orysa4|Os08g28680.1,Orysa4|Os10g11260.1  
AT5G56150  
AT5G53300  
AT3G13550 Orysa4|Os07g38940.1  
AT5G50870 Orysa4|Os01g70140.1  
AT3G55380  
Orysa4|Os09g12230.1  
AT2G02760,AT1G14400 Orysa4|Os03g57790.1,Orysa4|Os07g07240.1,Orysa4|Os05g08960.1  
Orysa4|Os10g31000.1  
AT4G36800  
Orysa4|Os10g39120.1,Orysa4|Os03g03130.1  
AT5G05920 Orysa4|Os09g25370.1,Orysa4|Os03g52970.1  
AT1G57770 Orysa4|Os03g62510.1  
AT4G33100 Orysa4|Os09g19750.1  
AT3G12210 Orysa4|Os03g51880.1  
Orysa4|Os02g33070.1  
AT5G04750 Orysa4|Os08g44460.1  
AT4G01690 Orysa4|Os01g18320.1  
AT2G45130 Orysa4|Os07g42330.1,Orysa4|Os03g29250.1,Orysa4|Os10g25310.1  
AT5G15330  
AT5G20150,AT2G26660 Orysa4|Os02g10780.1,Orysa4|Os06g40120.1  
AT4G17010 Orysa4|Os02g29220.1,Orysa4|Os04g35220.1,Orysa4|Os01g46420.1  
AT2G37990 Orysa4|Os04g58830.1  
Orysa4|Os07g03620.1,Orysa4|Os07g03610.1,Orysa4|Os07g14070.1,Orysa4|Os07g14030.1  
Orysa4|Os01g28450.1,Orysa4|Os01g28500.1,Orysa4|Os10g11500.1,Orysa4|Os07g03710.1,Orysa4|Os07g03730.1,Orysa4|Os07g03740.1,Orysa4|Os07g03690.1,Orysa4|Os07g03750.1,Orysa4|Os07g03680.1,Orysa4|Os07g03499.1,Orysa4|Os07g03409.1,Orysa4|Os07g03319.1,Orysa4|Os07g03600.1,Orysa4|Os07g03279.1,Orysa4|Os07g03590.1,Orysa4|Os07g03288.1,Orysa4|Os07g03377.1,Orysa4|Os07g03467.1  
AT4G30320  
AT4G31470 Orysa4|Os05g51660.1,Orysa4|Os05g51680.1  
AT5G02730,AT3G09590,AT1G01310  
AT5G66590  
Orysa4|Os04g22230.1,Orysa4|Os04g22220.1,Orysa4|Os04g22340.1,Orysa4|Os04g22330.1,Orysa4|Os02g54570.1  
Orysa4|Os06g24290.1,Orysa4|Os02g27300.1,Orysa4|Os02g54530.1  
AT2G19980,AT2G19970,AT2G19990,AT1G50050,AT1G50060,AT4G33730,AT2G14580,AT2G14610,AT4G33720,AT3G19690,AT4G33710,AT5G26130,AT4G07820  
AT4G25780  
Orysa4|Os12g43700.1  
AT5G57625,AT4G25790  
Orysa4|Os02g54540.1  
AT2G34470 Orysa4|Os05g49050.1  
AT1G12020,AT5G13090,AT1G24270 Orysa4|Os02g30420.1,Orysa4|Os11g29810.1  
AT1G51650 Orysa4|Os08g15170.1  
AT5G01260 Orysa4|Os01g63810.1,Orysa4|Os05g37450.1  
Orysa4|Os01g10810.1  
AT3G57930,AT2G42190 Orysa4|Os06g21580.1,Orysa4|Os02g48600.1  
Orysa4|Os09g31446.1  
Orysa4|Os04g43550.1  
AT3G25400  
Orysa4|Os02g27810.1  
AT5G62790 Orysa4|Os01g01710.1  
AT4G16600,AT2G35710 Orysa4|Os04g46750.1  
Orysa4|Os10g40640.1  
AT1G78010 Orysa4|Os08g31460.1  
Orysa4|Os01g69100.1  
AT3G01860 Orysa4|Os04g31110.1  
AT5G40860,AT3G27210  
AT5G25780,AT5G27640,AT1G49015  
Orysa4|Os10g41960.1  
AT4G33945 Orysa4|Os02g52370.1  
Orysa4|Os07g38540.1  
AT4G00100,AT3G60770 Orysa4|Os08g02400.1,Orysa4|Os08g02410.1  
Orysa4|Os01g16940.1  
AT1G31860  
AT2G41380  
AT5G10830,AT4G22530,AT1G55450,AT3G54150,AT3G61210 Orysa4|Os01g51870.1,Orysa4|Os01g40660.1  
AT1G32370 Orysa4|Os02g17850.1  
AT2G30270 Orysa4|Os05g27340.1  
AT3G56180 Orysa4|Os03g60210.1,Orysa4|Os03g60220.1  
AT3G11740,AT5G01750,AT2G14560,AT1G33840,AT3G16900 Orysa4|Os07g12730.1  
AT5G52110Orysa4|Os10g37840.1  
Orysa4|Os05g02730.1  
Orysa4|Os11g01130.1,Orysa4|Os12g01120.1  
AT2G17950 Orysa4|Os04g56780.1  
AT1G46480 Orysa4|Os04g55590.1  
AT5G59340  
Orysa4|Os06g02490.1  
Orysa4|Os08g06550.1  
AT1G31812

AT1G20970  
Orysa4|Os08g40250.1  
AT4G27500 Orysa4|Os08g30060.1,Orysa4|Os09g17730.1  
Orysa4|Os10g34750.1  
AT1G66730 Orysa4|Os01g49180.1  
AT1G08130,AT1G49250  
AT5G17360  
AT3G15605  
AT5G11470Orysa4|Os01g42460.1  
AT4G15790 Orysa4|Os12g35620.1  
AT5G19180 Orysa4|Os01g16540.1  
Orysa4|Os02g09420.1,Orysa4|Os06g43180.1  
AT4G34180,AT1G44542,AT4G35220 Orysa4|Os08g23100.1,Orysa4|Os09g02270.1  
AT3G11940,AT2G37270 Orysa4|Os01g01060.1,Orysa4|Os11g29190.1  
AT3G10920  
AT3G56350  
Orysa4|Os05g25850.1  
Orysa4|Os12g03460.1  
AT5G50810 Orysa4|Os08g42380.1  
AT1G26480  
AT1G34760  
AT5G10450,AT5G65430  
Orysa4|Os11g34450.1  
AT3G02520,AT5G16050,AT5G38480  
Orysa4|Os04g38870.1,Orysa4|Os02g36974.1,Orysa4|Os08g33370.1,Orysa4|Os03g50290.1  
Orysa4|Os01g11110.1  
AT1G22290,AT1G22300,AT1G78220 Orysa4|Os11g39540.1  
AT2G42590  
AT4G09000,AT1G35160,AT1G78300  
AT2G10450  
Orysa4|Os08g37490.1  
AT3G54570 Orysa4|Os01g72190.1,Orysa4|Os05g31690.1  
AT5G13520 Orysa4|Os03g60460.1  
AT5G18890,AT5G18860,AT5G18870 Orysa4|Os05g33644.1,Orysa4|Os05g33630.1  
AT3G47860 Orysa4|Os04g53490.1  
AT5G64380 Orysa4|Os06g45370.1  
AT3G54050 Orysa4|Os03g16050.1  
AT1G43670 Orysa4|Os05g36270.1,Orysa4|Os01g64660.1  
Orysa4|Os10g39880.1  
Orysa4|Os10g21200.1,Orysa4|Os08g35420.1  
Orysa4|Os04g16730.1  
Orysa4|Os03g59830.1  
Orysa4|Os11g13490.1  
AT3G23160 Orysa4|Os04g08764.1  
AT5G04550  
Orysa4|Os12g05180.1  
Orysa4|Os10g23840.1,Orysa4|Os08g13850.1,Orysa4|Os03g16390.1,Orysa4|Os01g62670.1,Orysa4|Os05  
g38320.1  
AT5G51670 Orysa4|Os03g64130.1  
AT5G08280  
Orysa4|Os02g07230.1  
AT2G34020,AT2G34030,AT1G29020  
AT1G53210 Orysa4|Os01g11414.1,Orysa4|Os02g14980.1  
AT3G15357 Orysa4|Os02g18390.1  
Orysa4|Os04g54430.1  
Orysa4|Os02g16480.1  
Orysa4|Os05g12280.1  
AT2G22080  
AT3G50550  
Orysa4|Os02g09140.1  
AT2G11910Orysa4|Os09g38400.1  
AT1G07780,AT5G05590,AT1G29410 Orysa4|Os02g16630.1  
AT5G48880  
AT1G04710,AT2G33150 Orysa4|Os02g57260.1  
Orysa4|Os10g31950.1  
AT2G37660 Orysa4|Os03g60740.1  
AT5G02240 Orysa4|Os05g01970.1  
AT1G79500,AT1G16340 Orysa4|Os12g10784.1  
AT5G26610 Orysa4|Os04g02500.1  
AT2G18245 Orysa4|Os02g04110.1  
AT3G19970 Orysa4|Os06g51390.1  
AT4G19820,AT4G19810,AT4G19740,AT4G19720,AT4G19730,AT4G19750,AT4G19760,AT4G19770,AT4G19800  
Orysa4|Os04g30770.1,Orysa4|Os11g27400.1  
AT5G63150 Orysa4|Os03g46730.1  
Orysa4|Os01g60190.1,Orysa4|Os05g40420.1  
AT1G09780,AT3G08590  
AT5G42930,AT1G56630,AT1G45201,AT5G67050,AT3G14360  
Orysa4|Os02g52830.1,Orysa4|Os06g10850.1,Orysa4|Os04g56240.1  
Orysa4|Os05g06140.1  
AT1G20570,AT1G80260 Orysa4|Os02g32340.1  
AT5G06360 Orysa4|Os07g47580.1  
AT3G23280,AT4G14365 Orysa4|Os07g26490.1

Orysa4|Os02g21970.1  
AT5G20000,AT5G19990 Orysa4|Os02g11050.1  
AT5G58290  
AT5G64580  
Orysa4|Os09g38730.1  
AT3G15120  
AT3G02450  
AT1G07510,AT2G29080 Orysa4|Os01g62500.1,Orysa4|Os05g38400.1  
Orysa4|Os04g39190.1  
AT4G23940  
AT2G26140 Orysa4|Os01g39250.1,Orysa4|Os01g39260.1  
Orysa4|Os06g51029.1  
Orysa4|Os06g39870.1  
AT4G04180 Orysa4|Os02g50680.1  
AT3G04340  
AT5G58870,AT3G47060 Orysa4|Os02g43350.1  
AT1G79560  
AT1G53750 Orysa4|Os02g54340.1,Orysa4|Os06g09290.1  
Orysa4|Os01g40820.1  
AT1G50250,AT5G42270  
AT1G45000,AT5G43010 Orysa4|Os06g40560.1,Orysa4|Os02g10640.1  
AT5G15250 Orysa4|Os06g12370.1  
AT2G20140,AT4G29040 Orysa4|Os07g49150.1  
AT3G05530,AT1G09100 Orysa4|Os02g56000.1  
AT5G53170 Orysa4|Os01g43150.1  
AT3G16290  
AT1G06430,AT2G30950 Orysa4|Os06g45820.1  
AT1G53780  
AT4G39100 Orysa4|Os03g58530.1,Orysa4|Os07g08880.1  
AT4G04260,AT4G22140 Orysa4|Os09g21770.1,Orysa4|Os08g32620.1  
AT4G40045 Orysa4|Os12g10510.1  
AT2G33560 Orysa4|Os02g10020.1  
AT2G20635 Orysa4|Os02g23930.1  
AT4G38710 Orysa4|Os02g24330.1  
AT1G13020,AT3G26400 Orysa4|Os04g40400.1,Orysa4|Os02g38220.1  
Orysa4|Os11g30320.1  
Orysa4|Os01g19990.1  
AT1G78430,AT1G17140 Orysa4|Os01g55280.1,Orysa4|Os05g43870.1  
AT2G45330,AT5G23600 Orysa4|Os06g04300.1  
AT1G29990 Orysa4|Os02g14860.1  
Orysa4|Os12g16770.1,Orysa4|Os04g34590.1  
AT3G49070 Orysa4|Os03g05440.1  
AT1G20180  
AT3G23410,AT4G28570  
Orysa4|Os10g33520.1,Orysa4|Os10g33540.1,Orysa4|Os10g33460.1,Orysa4|Os02g40840.1  
AT1G03990  
AT4G19380  
Orysa4|Os06g30690.1,Orysa4|Os10g33530.1,Orysa4|Os07g04290.1,Orysa4|Os10g33550.1,Orysa4|Os08g10520.1,Orysa4|Os08g26890.1,Orysa4|Os08g25990.1  
AT3G48070,AT5G62910 Orysa4|Os04g38970.1,Orysa4|Os02g37030.1  
AT1G74870  
AT5G67490 Orysa4|Os06g06330.1  
AT4G39690 Orysa4|Os04g54410.1  
AT3G49080 Orysa4|Os07g46440.1  
Orysa4|Os09g37590.1  
AT1G22460  
AT3G30300,AT3G03810  
AT1G52630  
AT5G01100  
Orysa4|Os02g04590.1  
Orysa4|Os06g17390.1,Orysa4|Os02g49460.1  
AT1G35510 Orysa4|Os12g07540.1  
Orysa4|Os06g11600.1  
AT1G20550,AT1G76270  
AT3G02250,AT5G15740  
Orysa4|Os01g07410.1,Orysa4|Os03g21090.1  
AT5G35570 Orysa4|Os09g27080.1  
AT4G38390  
Orysa4|Os04g47520.1  
AT2G01480,AT1G14970 Orysa4|Os01g62390.1,Orysa4|Os05g38490.1  
AT5G65470,AT4G24530 Orysa4|Os09g24570.1  
AT4G16650 Orysa4|Os04g46570.1  
AT1G38065,AT1G38131  
Orysa4|Os09g29940.1  
AT1G04910 Orysa4|Os11g29120.1,Orysa4|Os12g23760.1  
AT1G62330,AT1G11990 Orysa4|Os06g13220.1  
AT5G64600 Orysa4|Os12g08820.1  
AT2G44500,AT3G07900,AT5G63390  
AT2G37980,AT3G54100 Orysa4|Os01g63230.1,Orysa4|Os05g37880.1  
AT2G03280,AT1G14020 Orysa4|Os03g07310.1  
AT1G29200 Orysa4|Os06g35410.1  
AT3G26370 Orysa4|Os06g47290.1,Orysa4|Os02g06400.1

AT5G23240 Orysa4|Os04g57880.1  
Orysa4|Os06g28050.1  
AT3G46180,AT5G59740 Orysa4|Os05g02490.1  
Orysa4|Os06g43850.1  
AT5G13450  
AT3G52070 Orysa4|Os03g11780.1  
AT1G33270 Orysa4|Os11g34370.1  
AT3G20270  
Orysa4|Os09g32240.1  
AT1G04970 Orysa4|Os09g30474.1,Orysa4|Os06g20430.1  
AT2G39550 Orysa4|Os01g05680.1  
AT3G29170  
Orysa4|Os12g03500.1,Orysa4|Os11g03760.1  
AT1G58180,AT4G33580  
Orysa4|Os01g45274.1  
AT1G23730,AT1G70410,AT3G01500,AT5G14740  
Orysa4|Os05g45490.1,Orysa4|Os01g19870.1  
AT2G02910  
Orysa4|Os02g51160.1  
AT4G09630,AT1G34550  
Orysa4|Os11g09170.1  
AT5G46220  
AT4G38500 Orysa4|Os06g50860.1  
AT5G42660 Orysa4|Os01g54530.1,Orysa4|Os03g55920.1  
AT1G53040,AT1G28240  
AT4G12130 Orysa4|Os06g04380.1  
AT1G55255  
AT1G55250 Orysa4|Os10g41590.1  
AT2G44950 Orysa4|Os04g46450.1  
Orysa4|Os03g58880.1,Orysa4|Os07g09630.1,Orysa4|Os03g58890.1  
AT2G23096  
Orysa4|Os10g35470.1  
AT1G20270 Orysa4|Os02g58070.1  
AT3G28490,AT3G28480  
AT4G35820  
AT4G25600 Orysa4|Os01g07920.1  
AT2G43080 Orysa4|Os04g27850.1  
AT4G33910 Orysa4|Os03g55380.1  
Orysa4|Os10g27340.1  
AT3G06300,AT5G18900 Orysa4|Os05g41010.1  
AT5G66060,AT4G35810,AT2G17720  
Orysa4|Os03g06990.1,Orysa4|Os03g07000.1  
AT4G24840 Orysa4|Os03g63250.1  
AT2G21150 Orysa4|Os09g36480.1  
AT1G54780 Orysa4|Os05g33280.1  
AT3G51970,AT5G55350,AT5G55360,AT5G55340,AT5G51420,AT5G55330,AT1G34500,AT1G34520,AT1G34490,AT5G55320,AT5G55370,AT5G55380  
Orysa4|Os02g26840.1,Orysa4|Os04g20880.1,Orysa4|Os04g40580.1,Orysa4|Os04g40590.1,Orysa4|Os02g25700.1,Orysa4|Os01g46270.1  
AT4G02220 Orysa4|Os01g39650.1,Orysa4|Os03g18830.1  
AT3G16240 Orysa4|Os06g22960.1  
AT3G47440 Orysa4|Os04g46490.1  
AT1G52180  
AT2G25810 Orysa4|Os05g14240.1,Orysa4|Os01g13120.1  
AT2G36830,AT3G26520 Orysa4|Os03g05290.1  
AT4G01470 Orysa4|Os01g74450.1  
AT1G73190,AT1G17810 Orysa4|Os04g44570.1,Orysa4|Os10g35050.1  
AT4G17340,AT5G47450  
AT5G61900,AT5G07300 Orysa4|Os08g03890.1,Orysa4|Os02g32160.1  
AT1G08860 Orysa4|Os05g30970.1  
AT3G05010,AT5G27210 Orysa4|Os03g54920.1  
Orysa4|Os10g21310.1  
Orysa4|Os08g17980.1  
Orysa4|Os12g10600.1  
Orysa4|Os06g39710.1,Orysa4|Os09g04680.1,Orysa4|Os08g15260.1  
AT2G28105 Orysa4|Os10g39830.1  
Orysa4|Os09g23070.1  
AT4G04320  
AT1G71010 Orysa4|Os08g33200.1,Orysa4|Os09g23740.1,Orysa4|Os06g14750.1  
AT1G34260 Orysa4|Os04g59540.1,Orysa4|Os08g01390.1,Orysa4|Os09g10650.1,Orysa4|Os12g13440.1  
AT3G14270,AT4G33240 Orysa4|Os03g28140.1,Orysa4|Os08g34950.1  
AT4G24110 Orysa4|Os03g02300.1  
AT3G44890 Orysa4|Os02g57670.1  
AT4G26200 Orysa4|Os05g10780.1  
AT5G51690,AT1G62960 Orysa4|Os06g03990.1  
AT5G28360,AT3G61510,AT1G01480,AT4G11280 Orysa4|Os04g48850.1  
AT5G65800,AT3G49700,AT2G22810,AT4G37770,AT4G08040 Orysa4|Os03g51740.1  
AT1G33910,AT1G33900,AT1G33930,AT1G33890,AT1G33830,AT2G26820,AT1G33870,AT1G33880,AT1G33960,AT1G33950,AT2G34315,AT5G47270,AT4G09930,AT4G09940,AT4G09950  
AT1G33970 Orysa4|Os04g36030.1,Orysa4|Os02g35130.1  
AT1G25370,AT1G68340,AT1G48770,AT3G18295,AT4G17440  
Orysa4|Os05g47830.1,Orysa4|Os05g47820.1,Orysa4|Os01g49440.1

AT5G47240  
Orysa4|Os04g46280.1  
AT4G25434  
AT5G47650 Orysa4|Os06g42790.1  
AT2G04440,AT2G04430,AT2G04450,AT4G12720  
Orysa4|Os02g13350.1  
AT4G32040  
Orysa4|Os02g08544.1,Orysa4|Os06g43860.1  
AT1G62990 Orysa4|Os03g03164.1  
Orysa4|Os08g19650.1  
Orysa4|Os03g47016.1  
AT5G25220,AT5G11060  
Orysa4|Os04g16750.1  
Orysa4|Os10g38248.1  
Orysa4|Os04g16760.1,Orysa4|Os10g38229.1,Orysa4|Os10g21250.1  
Orysa4|Os03g41060.1  
AT2G18420,AT1G75750  
AT1G22690  
AT5G15230,AT1G74670  
Orysa4|Os04g39110.1  
Orysa4|Os09g24840.1,Orysa4|Os06g15620.1  
AT2G14900,AT5G59845,AT2G39540  
AT3G02885,AT2G30810  
Orysa4|Os05g31280.1  
Orysa4|Os05g35690.1  
AT4G09600,AT4G09610  
Orysa4|Os06g51320.1  
AT1G04730 Orysa4|Os03g15810.1  
Orysa4|Os05g49210.1  
Orysa4|Os04g04300.1  
Orysa4|Os06g05380.1  
AT1G18860,AT5G15130  
AT4G01720 Orysa4|Os01g18584.1,Orysa4|Os01g18600.1,Orysa4|Os05g04640.1  
AT1G69810  
AT4G22070,AT4G04450,AT1G62300 Orysa4|Os01g14440.1  
Orysa4|Os02g53100.1  
AT5G21040 Orysa4|Os04g52870.1  
Orysa4|Os07g02690.1,Orysa4|Os07g02880.1,Orysa4|Os07g02850.1,Orysa4|Os07g02920.1,Orysa4|Os07g02900.1,Orysa4|Os07g02870.1,Orysa4|Os07g02700.1,Orysa4|Os11g38240.1,Orysa4|Os11g38220.1,Orysa4|Os11g38210.1  
AT4G24130 Orysa4|Os10g37400.1  
Orysa4|Os05g49790.1,Orysa4|Os01g46390.1  
AT5G46230,AT1G30020 Orysa4|Os06g34790.1,Orysa4|Os01g11240.1  
AT1G56580,AT1G09310,AT5G49600  
AT5G43490,AT5G48610 Orysa4|Os08g41420.1  
Orysa4|Os03g63040.1  
AT5G03440  
Orysa4|Os07g29640.1  
AT3G54880  
Orysa4|Os01g07750.1  
AT3G15770  
AT1G15350  
AT5G25360 Orysa4|Os02g10720.1  
AT5G16290,AT2G31810 Orysa4|Os11g14950.1,Orysa4|Os02g39570.1  
AT1G27210,AT1G59850,AT5G62580 Orysa4|Os06g13600.1  
AT1G50890,AT4G27060 Orysa4|Os07g33630.1  
AT2G07170 Orysa4|Os09g38710.1  
AT2G40690 Orysa4|Os07g12640.1  
AT5G10820 Orysa4|Os09g25560.1  
AT5G25040,AT5G25050,AT1G79710 Orysa4|Os04g42130.1  
AT5G46420 Orysa4|Os05g49130.1  
AT1G09660 Orysa4|Os01g66300.1,Orysa4|Os05g34670.1  
AT2G38610,AT3G08620 Orysa4|Os03g60110.1,Orysa4|Os07g12490.1  
Orysa4|Os01g60260.1,Orysa4|Os05g40290.1  
AT4G26480,AT5G56140 Orysa4|Os02g49080.1  
AT4G33140 Orysa4|Os06g09320.1  
AT4G10940 Orysa4|Os12g10700.1  
AT4G10930  
AT1G35340 Orysa4|Os11g11210.1  
AT4G22330 Orysa4|Os03g49180.1  
AT3G19720 Orysa4|Os12g07880.1  
AT3G42628 Orysa4|Os01g54230.1  
AT1G68750 Orysa4|Os01g02050.1  
AT1G53310,AT3G14940 Orysa4|Os09g14670.1,Orysa4|Os08g27840.1,Orysa4|Os01g55350.1  
Orysa4|Os02g14770.1  
AT2G42600  
AT5G02250 Orysa4|Os01g62440.1  
AT1G09700 Orysa4|Os05g24160.1,Orysa4|Os11g01869.1  
AT5G16950 Orysa4|Os06g08510.1  
AT1G50510 Orysa4|Os08g39420.1  
AT5G48020 Orysa4|Os02g48630.1  
AT4G23440 Orysa4|Os01g55530.1

Orysa4|Os11g05350.1,Orysa4|Os11g36760.1  
AT5G56220 Orysa4|Os09g30380.1  
AT1G12380,AT1G62870 Orysa4|Os04g19140.1,Orysa4|Os02g25230.1  
AT2G46600 Orysa4|Os02g03020.1  
AT4G27280,AT5G54490 Orysa4|Os01g57470.1  
Orysa4|Os06g46950.1  
AT5G08170 Orysa4|Os04g39210.1  
Orysa4|Os07g44020.1  
AT4G12000,AT4G22850,AT1G12450 Orysa4|Os07g28440.1  
AT2G02370 Orysa4|Os03g25750.1  
AT4G37860,AT2G22720 Orysa4|Os02g44530.1  
AT1G44575 Orysa4|Os05g08590.1,Orysa4|Os01g64960.1  
Orysa4|Os04g59440.1  
AT2G26680 Orysa4|Os03g36910.1  
AT4G33760 Orysa4|Os01g06020.1  
AT1G50170  
Orysa4|Os02g19440.1  
AT1G78310,AT5G46780 Orysa4|Os10g42650.1  
AT1G80300,AT1G15500 Orysa4|Os02g11740.1,Orysa4|Os01g45910.1  
AT3G27025,AT5G14090 Orysa4|Os11g29840.1  
AT2G47300,AT2G47290 Orysa4|Os11g45250.1  
AT5G45420 Orysa4|Os08g06240.1  
AT3G49400 Orysa4|Os01g50690.1  
AT2G43640 Orysa4|Os04g53220.1  
AT1G36390 Orysa4|Os04g35180.1  
AT5G17710 Orysa4|Os02g39870.1  
Orysa4|Os05g41590.1,Orysa4|Os01g58740.1  
AT3G07690  
AT2G41540 Orysa4|Os01g71280.1  
AT3G25070  
Orysa4|Os02g30190.1,Orysa4|Os04g31030.1,Orysa4|Os06g43000.1,Orysa4|Os11g29210.1,Orysa4|Os03  
g63140.1  
AT3G04740 Orysa4|Os08g24400.1,Orysa4|Os09g10960.1  
AT1G10490,AT3G57940 Orysa4|Os12g07300.1  
AT1G08620  
Orysa4|Os06g51490.1  
AT5G46910 Orysa4|Os10g42690.1  
AT2G38950  
Orysa4|Os02g46930.1  
AT1G63490  
AT1G30810,AT2G34880,AT4G20400 Orysa4|Os05g23670.1  
AT4G21520  
AT2G35075 Orysa4|Os03g52794.1  
AT5G61040,AT5G08010 Orysa4|Os12g38730.1  
AT4G36580,AT2G18330 Orysa4|Os02g47760.1  
AT3G03060,AT5G16930 Orysa4|Os02g46990.1  
AT3G12850 Orysa4|Os03g02540.1  
AT3G61140  
AT2G27120,AT1G08260 Orysa4|Os02g30800.1  
AT3G55260 Orysa4|Os05g02510.1  
AT1G65590 Orysa4|Os05g34320.1,Orysa4|Os01g66700.1  
AT1G55915  
Orysa4|Os06g09170.1  
AT1G05900,AT2G31450 Orysa4|Os11g16580.1  
AT5G12220 Orysa4|Os01g59320.1,Orysa4|Os12g08800.1  
AT1G78090,AT1G22210,AT1G35910,AT4G39770,AT2G22190,AT5G65140,AT5G10100  
Orysa4|Os09g20390.1,Orysa4|Os08g31630.1  
Orysa4|Os03g26910.1,Orysa4|Os07g43160.1  
Orysa4|Os04g46760.1,Orysa4|Os02g44230.1  
AT5G51460,AT4G12430,AT4G22590 Orysa4|Os10g40550.1  
Orysa4|Os08g25410.1,Orysa4|Os06g23010.1  
Orysa4|Os06g11840.1,Orysa4|Os02g51680.1  
Orysa4|Os12g09060.1  
AT3G03870,AT5G18130 Orysa4|Os07g10420.1,Orysa4|Os03g59180.1  
AT3G27850,AT3G27830,AT3G27840 Orysa4|Os05g49320.1,Orysa4|Os01g47330.1  
AT5G51200 Orysa4|Os02g10790.1  
Orysa4|Os11g19780.1  
Orysa4|Os08g07260.1,Orysa4|Os08g35310.1,Orysa4|Os08g19420.1,Orysa4|Os11g20160.1,Orysa4|Os11  
g20090.1,Orysa4|Os11g12760.1,Orysa4|Os11g20040.1,Orysa4|Os11g19880.1,Orysa4|Os11g19790.1,Orysa4|Os11g2  
0080.1,Orysa4|Os07g28040.1,Orysa4|Os07g27880.1,Orysa4|Os07g27970.1,Orysa4|Os12g25870.1,Orysa4|Os12g25  
450.1,Orysa4|Os12g25820.1,Orysa4|Os12g25490.1,Orysa4|Os05g43930.1,Orysa4|Os05g43940.1,Orysa4|Os10g028  
80.1,Orysa4|Os10g02840.1,Orysa4|Os09g17560.1,Orysa4|Os11g33300.1,Orysa4|Os06g16960.1  
Orysa4|Os12g25860.1  
AT4G35160,AT4G35150  
Orysa4|Os11g11390.1  
AT1G26910,AT1G14320,AT1G66580  
Orysa4|Os03g21470.1  
AT2G03810 Orysa4|Os02g37120.1,Orysa4|Os04g39240.1  
AT1G13650  
AT4G03000  
AT5G50170 Orysa4|Os04g40070.1  
AT1G03370 Orysa4|Os06g19400.1,Orysa4|Os08g38440.1

Orysa4|Os02g10630.1,Orysa4|Os06g40570.1  
AT4G39150,AT2G21510 Orysa4|Os01g50700.1,Orysa4|Os05g46620.1  
Orysa4|Os09g32050.1,Orysa4|Os08g41110.1  
AT1G77020 Orysa4|Os02g35000.1  
AT1G21080,AT1G76700  
AT4G29780,AT5G12010  
Orysa4|Os05g09210.1,Orysa4|Os05g09280.1,Orysa4|Os05g09240.1,Orysa4|Os02g45610.1,Orysa4|Os01  
g09220.1,Orysa4|Os05g51520.1  
AT2G31340 Orysa4|Os09g12500.1  
AT1G73470 Orysa4|Os09g27610.1  
AT4G14770,AT3G22760,AT3G22780  
AT3G04850 Orysa4|Os05g51040.1  
Orysa4|Os04g09560.1  
Orysa4|Os07g07974.1  
Orysa4|Os05g43380.1  
Orysa4|Os12g41230.1,Orysa4|Os03g43730.1  
AT5G27560 Orysa4|Os06g05390.1  
AT1G04920 Orysa4|Os01g69030.1  
Orysa4|Os06g42820.1,Orysa4|Os11g12810.1  
Orysa4|Os11g12820.1  
AT4G10120  
AT5G11110,AT5G20280 Orysa4|Os02g09170.1,Orysa4|Os06g43630.1  
AT5G58750  
AT4G24220 Orysa4|Os03g30870.1,Orysa4|Os07g41050.1,Orysa4|Os03g32170.1  
AT2G19530,AT1G55160 Orysa4|Os01g39780.1,Orysa4|Os05g51540.1  
AT1G68350 Orysa4|Os01g04170.1  
AT1G12370 Orysa4|Os10g08580.1  
Orysa4|Os04g38580.1,Orysa4|Os09g36620.1  
AT2G14890,AT2G21330,AT4G37450 Orysa4|Os07g40130.1  
AT3G02670 Orysa4|Os03g43114.1  
AT5G65390,AT5G10430,AT2G22470,AT4G09030 Orysa4|Os04g37770.1  
Orysa4|Os05g40900.1  
AT1G68725  
Orysa4|Os07g42270.1  
Orysa4|Os09g07940.1,Orysa4|Os09g36470.1  
Orysa4|Os11g26720.1  
AT5G04910 Orysa4|Os01g16080.1  
AT1G73940  
AT5G49410 Orysa4|Os08g27140.1  
AT3G62730 Orysa4|Os03g22470.1  
AT1G47980 Orysa4|Os04g33150.1  
Orysa4|Os05g05920.1  
AT3G45890 Orysa4|Os04g22360.1  
AT1G13770 Orysa4|Os03g11500.1  
Orysa4|Os02g44810.1  
AT1G76120,AT1G20370  
AT1G48570  
AT1G55040 Orysa4|Os07g22024.1  
AT1G70650 Orysa4|Os03g50430.1  
AT2G31890 Orysa4|Os03g31150.1  
AT3G51040 Orysa4|Os03g58520.1  
AT2G26070 Orysa4|Os05g46240.1,Orysa4|Os01g51430.1  
AT3G04890  
AT2G46100 Orysa4|Os04g48860.1  
AT5G19690 Orysa4|Os05g44360.1  
AT1G34130 Orysa4|Os04g57890.1  
AT1G55350 Orysa4|Os02g47970.1  
AT5G51130,Orysa4|Os08g42760.1  
AT1G47056,AT4G07400,AT5G67250,AT3G50080  
Orysa4|Os03g19660.1,Orysa4|Os03g45910.1,Orysa4|Os04g42670.1  
Orysa4|Os03g42740.1  
AT4G31600 Orysa4|Os06g08860.1  
AT1G22020,AT1G36370 Orysa4|Os05g35440.1  
AT4G32520  
AT4G13930 Orysa4|Os11g26860.1,Orysa4|Os12g22030.1  
AT5G26780  
AT4G37930 Orysa4|Os03g52840.1  
AT4G13890  
AT5G66240 Orysa4|Os07g40030.1  
AT5G14530 Orysa4|Os05g46570.1  
AT1G03130,AT4G02770  
Orysa4|Os08g44680.1  
Orysa4|Os12g32240.1  
AT1G26630,AT1G69410  
Orysa4|Os07g02210.1,Orysa4|Os07g40580.1  
Orysa4|Os07g13230.1  
AT1G13950  
AT5G01225,AT3G09032,AT1G07300 Orysa4|Os01g63500.1  
Orysa4|Os03g21110.1  
AT1G57620,AT1G09580  
AT1G21900  
AT2G03290,AT2G03040,AT1G14010,AT1G69460,AT1G26690,AT3G29070



Orysa4|Os03g25930.1,Orysa4|Os07g43890.1  
Orysa4|Os06g10760.1,Orysa4|Os02g52920.1  
AT3G10780  
Orysa4|Os08g36560.1,Orysa4|Os09g27980.1  
AT1G67650,AT1G67680 Orysa4|Os01g66560.1  
AT1G49330,AT2G16190 Orysa4|Os12g13400.1,Orysa4|Os05g47580.1,Orysa4|Os05g47620.1  
AT2G34110,AT1G34355 Orysa4|Os11g07050.1  
AT1G11060,AT1G61030 Orysa4|Os10g35380.1  
AT1G09960 Orysa4|Os12g44380.1  
AT2G02860 Orysa4|Os02g58080.1  
Orysa4|Os03g07480.1,Orysa4|Os10g26470.1  
AT1G66570,AT2G14670,AT5G43610,AT5G06170,AT1G71890,AT1G71880,AT1G22710  
AT2G38770 Orysa4|Os03g26960.1  
AT3G50590 Orysa4|Os09g24260.1  
AT5G36000,AT3G61730,AT3G62500 Orysa4|Os01g11990.1  
AT2G28840  
Orysa4|Os01g74320.1,Orysa4|Os03g16780.1,Orysa4|Os11g29600.1,Orysa4|Os10g32780.1,Orysa4|Os05  
g02130.1  
AT5G02480,AT2G37570,AT3G12570 Orysa4|Os01g05790.1,Orysa4|Os01g62300.1  
Orysa4|Os02g07130.1,Orysa4|Os03g16910.1  
AT1G30550 Orysa4|Os06g08800.1  
AT1G45231 Orysa4|Os03g27930.1  
AT2G26890  
Orysa4|Os10g42439.1  
AT1G74260 Orysa4|Os05g01440.1,Orysa4|Os01g66500.1  
Orysa4|Os03g05300.1  
AT2G27970  
AT2G27960  
AT5G61770 Orysa4|Os03g22350.1  
AT2G40080,AT2G29950 Orysa4|Os08g27870.1,Orysa4|Os08g27860.1  
AT2G06255,AT1G17455,AT1G72630 Orysa4|Os11g40610.1  
Orysa4|Os03g29680.1  
Orysa4|Os11g13850.1  
AT1G71500  
AT1G10580  
AT5G54520 Orysa4|Os02g21490.1  
Orysa4|Os03g27970.1  
Orysa4|Os03g44840.1  
AT5G13760 Orysa4|Os07g46240.1  
AT3G32930 Orysa4|Os07g41710.1  
AT1G06930,AT2G40475,AT5G01790  
Orysa4|Os01g60940.1,Orysa4|Os05g39830.1,Orysa4|Os05g07280.1,Orysa4|Os01g07240.1  
Orysa4|Os07g12720.1  
AT3G56260 Orysa4|Os02g26330.1  
AT2G19385,AT2G19380 Orysa4|Os01g40110.1  
AT4G00590 Orysa4|Os04g58600.1  
Orysa4|Os11g32450.1,Orysa4|Os08g44470.1  
AT2G27730 Orysa4|Os09g39550.1  
AT4G21620  
AT2G19000 Orysa4|Os07g03180.1,Orysa4|Os12g43820.1  
AT1G61255 Orysa4|Os03g47270.1  
AT5G13250,AT1G28080 Orysa4|Os01g70340.1  
AT3G49390,AT5G24440  
Orysa4|Os08g02330.1  
AT1G32790,AT4G10610  
AT3G14450,AT1G53650  
Orysa4|Os06g21940.1,Orysa4|Os01g11120.1  
Orysa4|Os06g35030.1,Orysa4|Os02g14760.1  
Orysa4|Os09g14550.1  
AT3G48030 Orysa4|Os09g20900.1  
Orysa4|Os02g06460.1  
Orysa4|Os02g54090.1,Orysa4|Os12g31440.1  
AT3G54190,AT2G38630 Orysa4|Os01g60200.1,Orysa4|Os05g40410.1  
AT3G21300 Orysa4|Os01g09750.1  
AT3G12990,AT3G60500 Orysa4|Os02g34570.1  
AT4G04190 Orysa4|Os01g09500.1,Orysa4|Os04g33510.1  
AT1G79975 Orysa4|Os01g41040.1  
AT2G38040  
AT5G44750 Orysa4|Os06g47580.1  
AT3G43540 Orysa4|Os09g26580.1  
AT1G65000 Orysa4|Os03g64060.1  
AT4G24910  
AT1G27930,AT1G67330 Orysa4|Os11g29780.1  
AT1G33800,AT4G09990,AT1G09610,AT1G71690 Orysa4|Os11g13870.1,Orysa4|Os12g10320.1  
Orysa4|Os08g44400.1  
AT4G10000  
AT5G03880  
Orysa4|Os07g39970.1,Orysa4|Os07g39960.1  
AT1G49900 Orysa4|Os11g25610.1,Orysa4|Os07g40950.1,Orysa4|Os03g49132.1  
Orysa4|Os03g32230.1,Orysa4|Os03g32220.1,Orysa4|Os07g40080.1  
AT1G27730,AT5G04340,AT5G43170,AT3G19580,AT3G49930,AT5G67450  
Orysa4|Os03g41390.1,Orysa4|Os12g39400.1

AT5G56200  
AT4G35280,AT2G17180  
AT1G02040  
AT2G26940 Orysa4|Os02g19180.1  
AT3G10380 Orysa4|Os08g22864.1  
AT1G28250 Orysa4|Os07g20410.1  
Orysa4|Os04g44230.1,Orysa4|Os10g34230.1  
AT2G41510,AT3G63440 Orysa4|Os01g71310.1,Orysa4|Os05g31040.1  
AT5G21482  
AT1G75450 Orysa4|Os01g56810.1  
AT4G29740,AT2G19500,AT5G56970  
Orysa4|Os01g10110.1,Orysa4|Os01g09260.1,Orysa4|Os06g37500.1,Orysa4|Os02g12780.1  
AT2G48050  
AT2G48040 Orysa4|Os01g29230.1  
Orysa4|Os11g24610.1  
AT2G43460,AT3G59540  
AT1G34000 Orysa4|Os01g40710.1  
AT5G58090 Orysa4|Os02g04670.1  
AT5G20870 Orysa4|Os03g27980.1  
AT3G24330  
AT5G58480 Orysa4|Os03g18520.1  
AT4G31140  
Orysa4|Os08g12800.1  
AT3G04010,AT5G18220,AT2G19440,AT1G64760  
Orysa4|Os07g07340.1,Orysa4|Os03g57880.1,Orysa4|Os03g45390.1,Orysa4|Os11g36940.1  
AT4G17180 Orysa4|Os08g23720.1,Orysa4|Os09g09980.1  
AT5G64790 Orysa4|Os05g45860.1,Orysa4|Os06g39060.1  
AT5G51150,Orysa4|Os07g31260.1  
Orysa4|Os01g49790.1  
AT3G03900 Orysa4|Os11g41650.1  
AT5G67520  
AT4G39940  
AT2G14750  
Orysa4|Os07g38560.1  
AT4G12570 Orysa4|Os09g31090.1  
AT3G09390,AT5G02380  
Orysa4|Os12g38300.1,Orysa4|Os12g38064.1,Orysa4|Os12g38010.1,Orysa4|Os12g38270.1,Orysa4|Os12g38290.1,Orysa4|Os03g17870.1,Orysa4|Os05g02070.1,Orysa4|Os01g74300.1,Orysa4|Os01g05650.1  
AT5G07090,AT5G58420,AT2G17360 Orysa4|Os05g30530.1,Orysa4|Os01g25610.1  
AT1G66520 Orysa4|Os01g49330.1  
AT5G05930 Orysa4|Os05g37950.1  
AT4G21090,AT4G05450  
Orysa4|Os07g01930.1  
AT1G45230 Orysa4|Os02g52744.1  
AT3G46630 Orysa4|Os08g21700.1  
AT1G11880,Orysa4|Os12g31480.1  
AT4G18180 Orysa4|Os08g23790.1  
AT5G17200,AT5G27530,AT4G35670,AT5G44830,AT5G44840,AT3G15720,AT4G32370,AT4G32375,AT4G32380,AT1G80140  
AT1G48100 Orysa4|Os05g20020.1  
Orysa4|Os05g14150.1  
Orysa4|Os06g35370.1,Orysa4|Os06g35320.1,Orysa4|Os06g35300.1,Orysa4|Os06g40890.1,Orysa4|Os01g33300.1,Orysa4|Os02g10300.1  
Orysa4|Os06g40880.1  
AT5G14650  
AT5G39910 Orysa4|Os01g07790.1  
Orysa4|Os06g28670.1  
Orysa4|Os01g19170.1  
AT3G07820,AT3G07840,AT3G07830,AT5G48140,AT3G07850,AT3G14040,AT1G78400,AT2G33160,AT4G13760,AT2G40310,AT2G15460,AT2G15470,AT2G15450,AT2G26620,AT1G43090,AT1G43100,AT1G43080,AT1G17150  
Orysa4|Os01g36830.1  
AT1G56710,AT1G02460,AT4G01890  
Orysa4|Os03g11760.1  
AT1G23460,AT1G70500 Orysa4|Os02g03750.1  
AT2G43870,AT3G59850,AT1G65570,AT2G43860,AT2G43890,AT1G05650,AT1G05660,AT2G43880  
Orysa4|Os01g66710.1,Orysa4|Os01g43490.1,Orysa4|Os11g14410.1,Orysa4|Os11g14400.1  
AT1G80170 Orysa4|Os05g46510.1  
AT1G10640,AT1G60590 Orysa4|Os05g50260.1,Orysa4|Os01g45060.1  
AT2G41850,AT3G57510,AT3G07970  
Orysa4|Os07g10740.1,Orysa4|Os07g10680.1,Orysa4|Os07g10730.1,Orysa4|Os07g10700.1,Orysa4|Os03g59330.1  
AT1G02790  
Orysa4|Os01g22590.1  
AT3G26610  
Orysa4|Os01g10280.1  
AT2G37690,AT2G05140  
AT5G52380  
AT2G12880 Orysa4|Os04g46920.1  
AT3G01360 Orysa4|Os06g13160.1  
AT3G27430,AT5G40580 Orysa4|Os05g09490.1  
AT1G03210,AT4G02850,AT4G02860 Orysa4|Os03g32040.1,Orysa4|Os01g16146.1  
Orysa4|Os10g31760.1,Orysa4|Os07g18700.1

AT3G51895,AT4G02700  
AT1G23090 Orysa4|Os04g55800.1  
AT1G22150,AT1G78000,AT4G08620 Orysa4|Os08g31410.1  
AT3G15990 Orysa4|Os06g05160.1  
Orysa4|Os03g09940.1  
Orysa4|Os03g09980.1,Orysa4|Os03g09970.1  
AT5G13550,AT3G12520 Orysa4|Os09g06499.1  
AT5G10180,AT1G77990 Orysa4|Os03g09930.1  
Orysa4|Os03g06520.1  
AT5G19600 Orysa4|Os01g41050.1,Orysa4|Os01g52130.1  
AT5G50175,AT4G28340,AT4G28330,AT4G03600,AT1G03730 Orysa4|Os12g19860.1  
Orysa4|Os11g05070.1  
AT5G17860  
Orysa4|Os03g40320.1  
AT5G17850  
AT3G14070,AT1G54115 Orysa4|Os03g08230.1  
Orysa4|Os12g42910.1,Orysa4|Os03g45370.1,Orysa4|Os11g01580.1,Orysa4|Os10g30070.1  
AT1G08960  
Orysa4|Os09g16170.1  
AT2G01610,AT1G14890,AT1G23205,AT1G70720  
AT1G62760,AT5G62360,AT5G51520,AT4G25250,AT3G47670,AT3G47380,AT5G62350,AT4G25260,AT4G12390,AT1  
G62770,AT5G20740,AT4G00080  
Orysa4|Os08g24160.1,Orysa4|Os06g49760.1,Orysa4|Os04g01570.1  
AT2G47670,AT3G62820  
AT5G62330,AT5G62340  
Orysa4|Os10g10560.1,Orysa4|Os10g10620.1,Orysa4|Os10g10630.1,Orysa4|Os10g10700.1,Orysa4|Os03  
g40900.1  
AT5G60190  
Orysa4|Os11g01180.1,Orysa4|Os12g01180.1,Orysa4|Os12g01290.1,Orysa4|Os11g01290.1,Orysa4|Os08  
g39040.1  
AT5G43650 Orysa4|Os01g56690.1,Orysa4|Os03g53020.1  
AT4G33250 Orysa4|Os03g08450.1  
Orysa4|Os07g17210.1  
AT1G65470  
Orysa4|Os01g67100.1  
AT3G01370 Orysa4|Os04g39060.1  
AT4G29750 Orysa4|Os09g19850.1  
AT4G14510,AT3G23070 Orysa4|Os11g37990.1  
AT3G18390 Orysa4|Os05g47850.1  
AT3G25440 Orysa4|Os04g41550.1  
AT5G16180 Orysa4|Os08g27150.1  
AT4G00525 Orysa4|Os04g47130.1  
AT5G56290 Orysa4|Os08g39080.1  
AT3G13235 Orysa4|Os02g10510.1  
AT1G07220 Orysa4|Os05g05690.1  
AT3G48980,AT5G23850,AT1G63420,AT3G61270,AT2G45830,AT3G61290,AT3G61280,AT2G45840  
Orysa4|Os08g01150.1,Orysa4|Os06g05940.1,Orysa4|Os04g45160.1,Orysa4|Os02g42920.1  
AT2G39990 Orysa4|Os05g01450.1  
AT2G06025 Orysa4|Os03g07990.1  
Orysa4|Os03g22730.1,Orysa4|Os03g22740.1  
AT3G05060,AT5G27120,AT5G27140  
AT1G56110,AT3G12860 Orysa4|Os07g46720.1,Orysa4|Os03g22880.1  
AT2G07360 Orysa4|Os03g15900.1  
AT1G27680,AT4G39210,AT2G21590 Orysa4|Os01g44220.1,Orysa4|Os05g50380.1  
AT1G05610  
AT5G19220 Orysa4|Os03g52460.1  
AT5G48300 Orysa4|Os09g12660.1,Orysa4|Os08g25734.1  
Orysa4|Os11g09850.1  
AT3G51610 Orysa4|Os05g07640.1  
AT1G30280  
AT1G75100  
AT4G36520,AT1G75310  
Orysa4|Os03g10180.1  
AT4G12770,AT4G12780 Orysa4|Os11g43950.1,Orysa4|Os12g36180.1  
Orysa4|Os02g02900.1  
Orysa4|Os06g46440.1  
Orysa4|Os01g44310.1,Orysa4|Os05g50370.1  
AT1G21660  
AT2G31070  
AT1G53230,AT3G15030 Orysa4|Os01g55100.1,Orysa4|Os09g24480.1,Orysa4|Os01g11550.1  
AT5G65960 Orysa4|Os04g49530.1  
AT5G19530 Orysa4|Os02g14190.1  
Orysa4|Os03g29630.1,Orysa4|Os03g22400.1,Orysa4|Os01g25370.1  
AT4G15880,AT4G00690,AT3G06910  
Orysa4|Os11g37210.1  
AT4G14746  
Orysa4|Os10g28400.1,Orysa4|Os10g28380.1,Orysa4|Os03g06580.1  
AT3G07150 Orysa4|Os01g68960.1  
AT5G01230 Orysa4|Os06g49140.1  
AT4G39870 Orysa4|Os06g11790.1,Orysa4|Os02g51770.1  
AT2G05590 Orysa4|Os07g25700.1  
Orysa4|Os02g20170.1

Orysa4|Os01g48190.1,Orysa4|Os05g48800.1  
 AT1G02750,AT4G02200,AT3G06760,AT5G49230,AT3G05700,AT5G26990,AT1G56280 Orysa4|Os12g36900.1  
 Orysa4|Os01g73960.1,Orysa4|Os05g01730.1  
 AT1G76405,AT1G20816 Orysa4|Os02g58550.1  
 AT1G15390 Orysa4|Os01g37510.1  
 AT5G03370 Orysa4|Os06g15390.1,Orysa4|Os06g15380.1  
 AT3G24500 Orysa4|Os06g39240.1  
 AT2G42680,AT3G58680  
 Orysa4|Os08g27850.1  
 AT2G38050 Orysa4|Os11g08110.1,Orysa4|Os01g63260.1  
 AT5G20500 Orysa4|Os06g44910.1  
 AT1G77370 Orysa4|Os02g43180.1  
 AT3G10960 Orysa4|Os05g33450.1,Orysa4|Os05g26840.1  
 AT5G50300 Orysa4|Os11g24060.1  
 AT5G35930 Orysa4|Os06g02160.1  
 AT1G79230,AT1G16460 Orysa4|Os02g07040.1  
 AT3G27700 Orysa4|Os04g32340.1  
 AT5G01270 Orysa4|Os01g63820.1  
 AT4G21670 Orysa4|Os04g44710.1,Orysa4|Os02g42600.1  
 AT1G80950 Orysa4|Os05g28960.1  
 AT1G10870,AT1G60860 Orysa4|Os02g42134.1  
 AT5G13300,AT5G61980 Orysa4|Os08g42530.1,Orysa4|Os09g33600.1  
 Orysa4|Os02g05780.1  
 AT3G58610 Orysa4|Os05g49800.1,Orysa4|Os01g46380.1  
 Orysa4|Os10g30970.1  
 AT5G67270 Orysa4|Os10g35580.1  
 AT5G62500,AT3G47690 Orysa4|Os04g54940.1  
 AT1G06750,AT2G30630,AT1G04280 Orysa4|Os01g56764.1,Orysa4|Os05g43300.1,Orysa4|Os03g43010.1  
 AT1G19400,AT1G75180 Orysa4|Os03g56420.1  
 Orysa4|Os03g12700.1  
 AT1G01500  
 AT5G55760 Orysa4|Os04g20270.1  
 AT3G56120 Orysa4|Os02g39370.1  
 AT3G49580,AT3G49570,AT5G24655,AT5G24660  
 Orysa4|Os10g36580.1,Orysa4|Os10g36610.1,Orysa4|Os02g03710.1  
 AT3G16990 Orysa4|Os03g19390.1  
 AT3G24530 Orysa4|Os02g16660.1  
 Orysa4|Os01g32830.1  
 AT1G32080 Orysa4|Os10g42780.1  
 AT1G07270,AT2G29680 Orysa4|Os01g63710.1  
 AT3G24630 Orysa4|Os01g12840.1  
 AT5G42710 Orysa4|Os03g56430.1  
 AT1G15860 Orysa4|Os08g34070.1  
 Orysa4|Os04g30720.1  
 Orysa4|Os01g14090.1  
 AT5G27550 Orysa4|Os05g33030.1  
 Orysa4|Os09g35890.1,Orysa4|Os08g43400.1  
 AT1G59540 Orysa4|Os11g35090.1  
 AT3G16060  
 AT2G47500 Orysa4|Os03g18980.1  
 AT1G09170  
 AT2G28620  
 AT3G19050  
 AT5G60930  
 Orysa4|Os06g10500.1  
 AT1G21730  
 AT5G55520  
 Orysa4|Os02g50910.1  
 AT1G72250 Orysa4|Os12g42160.1  
 AT1G01950  
 Orysa4|Os04g53760.1  
 AT4G14330 Orysa4|Os02g56540.1  
 AT3G12020,AT5G06670 Orysa4|Os02g53520.1  
 AT2G36200 Orysa4|Os08g44420.1  
 AT2G22610  
 AT3G50240  
 Orysa4|Os03g02290.1  
 Orysa4|Os01g54080.1  
 AT1G20060 Orysa4|Os02g01180.1  
 AT5G33300  
 Orysa4|Os11g44880.1,Orysa4|Os12g36100.1  
 AT2G37420  
 AT5G42490,AT4G24170  
 AT5G27000  
 Orysa4|Os07g44400.1  
 AT1G55550  
 AT3G23670,AT4G14150 Orysa4|Os02g28850.1,Orysa4|Os04g28260.1  
 AT1G18410,AT1G73860 Orysa4|Os06g36080.1  
 Orysa4|Os04g35510.1  
 AT3G45850 Orysa4|Os05g02670.1  
 Orysa4|Os12g39980.1  
 Orysa4|Os11g37140.1

AT5G02370 Orysa4|Os05g38480.1  
           Orysa4|Os01g15540.1  
           Orysa4|Os02g13570.1  
 AT5G23910  
 AT1G18550  
 AT5G47820 Orysa4|Os09g02650.1  
 AT3G54870 Orysa4|Os03g05820.1  
 AT3G44050  
           Orysa4|Os01g42070.1  
 AT3G49650 Orysa4|Os03g56260.1  
 AT2G21300,AT4G38950 Orysa4|Os02g43050.1,Orysa4|Os02g43130.1,Orysa4|Os04g45580.1  
 AT3G17360  
 AT1G18370 Orysa4|Os01g33040.1  
 AT3G10310  
 AT3G20150 Orysa4|Os03g39020.1  
 AT4G39050,AT2G21380 Orysa4|Os10g36880.1  
 AT5G65930 Orysa4|Os04g57140.1  
 AT1G12430 Orysa4|Os06g04560.1  
 AT4G26660  
           Orysa4|Os06g10480.1  
 AT3G43210  
 AT5G66310,AT3G51150  
 AT1G63640,AT5G41310  
 AT3G63480 Orysa4|Os08g02380.1  
 AT3G10180  
 AT4G05190,AT4G21270,AT4G27180,AT5G54670 Orysa4|Os03g64415.1  
 AT5G27950 Orysa4|Os11g42800.1  
 AT3G44730  
           Orysa4|Os03g53920.1  
 AT5G39250 Orysa4|Os03g30920.1  
 AT1G10840 Orysa4|Os04g30780.1  
 AT5G18420 Orysa4|Os12g09610.1,Orysa4|Os11g13694.1  
 AT5G63320  
 AT3G01770,AT5G14270  
 AT3G52280  
 AT5G63330  
           Orysa4|Os01g11580.1  
 AT1G06230  
 AT3G27260 Orysa4|Os08g03360.1  
 AT1G73150,AT1G17790  
 AT5G10550,AT5G65630 Orysa4|Os08g09340.1  
           Orysa4|Os07g32420.1  
           Orysa4|Os06g24870.1  
           Orysa4|Os02g38980.1  
 AT2G34900 Orysa4|Os06g04640.1  
           Orysa4|Os01g46040.1,Orysa4|Os02g15220.1  
 AT5G46550  
 AT3G55960 Orysa4|Os05g39070.1,Orysa4|Os01g61640.1  
           Orysa4|Os04g48770.1,Orysa4|Os09g32020.1  
 AT4G38930,AT2G21270 Orysa4|Os02g08480.1  
 AT2G29070  
           Orysa4|Os01g05120.1  
 AT2G45530 Orysa4|Os10g34030.1  
 AT3G21540 Orysa4|Os03g05720.1  
 AT4G34530  
 AT1G68920,AT1G26260  
           Orysa4|Os06g16400.1  
 AT5G62610  
           Orysa4|Os12g41650.1  
           Orysa4|Os02g47660.1  
 AT1G59640  
 AT1G51140  
 AT2G18300,AT4G36540  
 AT3G07340,AT5G48560  
           Orysa4|Os03g12940.1,Orysa4|Os03g51910.1  
 AT2G46970  
 AT1G18400,AT1G73830,AT1G25330  
 AT3G57800,AT2G42300 Orysa4|Os06g41060.1  
           Orysa4|Os09g32510.1,Orysa4|Os08g41320.1,Orysa4|Os01g68700.1,Orysa4|Os04g28280.1  
 AT1G35460,AT4G09180  
 AT5G61270,AT1G09530  
 AT3G23690  
 AT1G10120  
           Orysa4|Os08g38080.1,Orysa4|Os09g29830.1  
 AT2G43010,AT3G59060 Orysa4|Os03g56950.1  
           Orysa4|Os09g33580.1,Orysa4|Os08g42470.1  
 AT5G50915  
           Orysa4|Os12g40590.1,Orysa4|Os12g40730.1  
           Orysa4|Os03g58830.1  
 AT4G36930 Orysa4|Os02g56140.1,Orysa4|Os06g06900.1  
 AT3G42310 Orysa4|Os04g52770.1  
 AT1G53120 Orysa4|Os01g54390.1

AT5G49620,AT3G06490  
AT5G15310,AT3G01140  
AT4G17785  
AT4G18770  
AT4G38620 Orysa4|Os09g36730.1  
Orysa4|Os01g12700.1,Orysa4|Os05g41166.1  
Orysa4|Os01g09590.1,Orysa4|Os01g52410.1  
AT4G21440,AT4G05100  
Orysa4|Os08g43450.1  
Orysa4|Os03g29614.1  
Orysa4|Os04g50680.1  
Orysa4|Os03g27090.1  
AT1G63910 Orysa4|Os08g05520.1  
AT1G57560,AT1G09540  
AT3G46130,AT5G59780 Orysa4|Os11g47460.1,Orysa4|Os12g37970.1  
Orysa4|Os02g36890.1  
AT1G66230,AT5G16600  
AT3G12720  
AT5G65230,AT5G10280  
AT4G00540  
Orysa4|Os02g54520.1  
AT3G55730,AT2G39880  
AT5G40360,AT3G27785,AT5G40430,AT2G25230  
Orysa4|Os01g19970.1  
AT4G22680 Orysa4|Os09g36250.1  
AT3G08500 Orysa4|Os12g33070.1  
AT5G62470,AT3G47600,AT3G28910,AT1G74650,AT1G08810 Orysa4|Os11g03440.1,Orysa4|Os12g03150.1  
Orysa4|Os01g74410.1  
AT2G23290,AT4G37260  
AT3G53200  
AT4G26930,AT5G55020  
AT1G18960  
AT2G37630 Orysa4|Os12g38400.1  
AT4G25560,AT5G52260,AT3G48920 Orysa4|Os04g45020.1,Orysa4|Os02g42850.1,Orysa4|Os02g02370.1  
AT5G54230  
Orysa4|Os07g37210.1  
Orysa4|Os01g63680.1,Orysa4|Os07g12130.1  
AT1G48000 Orysa4|Os03g20090.1  
AT5G40350,AT3G27810,AT3G01530 Orysa4|Os01g45090.1,Orysa4|Os05g49310.1  
AT5G40330,AT5G14750,AT3G27920,AT5G52600  
Orysa4|Os06g40330.1  
Orysa4|Os11g01430.1  
AT5G56110  
Orysa4|Os05g48010.1,Orysa4|Os01g49160.1  
AT2G32460  
Orysa4|Os02g49250.1  
Orysa4|Os02g17190.1  
AT2G26950,AT2G26960 Orysa4|Os01g07430.1  
AT1G73410,AT1G17950,AT1G26780,AT4G33450,AT3G29020,AT1G69560  
AT5G35550  
AT5G17800  
AT3G30210,AT4G13480,AT3G24310 Orysa4|Os04g42950.1,Orysa4|Os02g40530.1  
Orysa4|Os09g26170.1  
AT4G28110  
AT5G67300,AT3G50060  
AT5G16770,AT3G02940  
Orysa4|Os04g32570.1,Orysa4|Os12g02430.1,Orysa4|Os03g14100.1,Orysa4|Os02g09670.1,Orysa4|Os09g32972.1,Orysa4|Os04g51800.1  
Orysa4|Os06g46560.1  
AT3G09230  
AT5G07700,AT5G07690,AT5G61420  
AT3G62610,AT2G47460  
Orysa4|Os03g04900.1  
Orysa4|Os06g11780.1  
AT5G14340  
Orysa4|Os05g04820.1,Orysa4|Os01g18240.1  
AT3G28470  
AT4G12350  
Orysa4|Os09g24800.1,Orysa4|Os08g33940.1,Orysa4|Os07g43580.1,Orysa4|Os03g26130.1,Orysa4|Os07g25150.1  
AT3G61250 Orysa4|Os04g45060.1  
Orysa4|Os01g50720.1,Orysa4|Os05g46610.1,Orysa4|Os01g36460.1,Orysa4|Os03g25550.1,Orysa4|Os07g44090.1,Orysa4|Os01g07450.1  
Orysa4|Os05g31650.1  
Orysa4|Os04g39470.1  
Orysa4|Os08g33800.1  
Orysa4|Os01g19330.1,Orysa4|Os05g04210.1  
Orysa4|Os08g43550.1  
Orysa4|Os01g59660.1  
AT1G79180,AT1G16490,AT3G12820,AT1G56160 Orysa4|Os02g46780.1,Orysa4|Os04g50770.1  
AT5G62320  
AT5G26660

Orysa4|Os06g04960.1  
AT5G65790,AT3G49690  
AT4G09460,AT1G35515,AT1G22640  
AT4G32730,AT5G11510 Orysa4|Os12g13570.1,Orysa4|Os01g12860.1  
AT3G13890 Orysa4|Os01g51260.1  
Orysa4|Os09g01960.1  
Orysa4|Os12g37690.1,Orysa4|Os11g45740.1  
Orysa4|Os10g35660.1,Orysa4|Os03g38210.1  
Orysa4|Os01g65370.1  
Orysa4|Os01g16810.1  
AT2G16720,AT4G34990  
AT5G57620  
Orysa4|Os06g43090.1,Orysa4|Os02g09480.1  
Orysa4|Os03g13310.1  
AT5G39700 Orysa4|Os06g32930.1  
AT4G37780  
AT2G02820,AT1G14350 Orysa4|Os07g43420.1  
AT3G60460  
AT2G31180,AT1G06180,AT3G23250 Orysa4|Os10g33810.1,Orysa4|Os04g43680.1  
AT5G12870  
AT2G36890,AT5G23000  
AT1G68320,AT1G25340 Orysa4|Os01g03720.1  
AT2G47190  
Orysa4|Os06g06740.1,Orysa4|Os12g07610.1  
AT1G74080,AT1G18570,AT5G60890  
AT3G11440,AT5G06100  
Orysa4|Os08g15020.1  
AT1G66390,AT1G56650,AT1G66380,AT1G66370  
AT5G58850,AT5G11050  
Orysa4|Os05g28320.1,Orysa4|Os01g74590.1  
Orysa4|Os07g25370.1,Orysa4|Os07g30130.1  
AT4G01680  
Orysa4|Os06g02250.1  
Orysa4|Os07g31470.1  
Orysa4|Os08g33150.1,Orysa4|Os09g23620.1,Orysa4|Os06g14670.1,Orysa4|Os02g49986.1  
AT1G34670  
AT5G02320,AT3G09370 Orysa4|Os01g62410.1,Orysa4|Os05g38460.1  
Orysa4|Os03g56090.1  
Orysa4|Os01g63160.1  
AT1G71030  
AT3G13540 Orysa4|Os01g50110.1  
Orysa4|Os03g18480.1  
Orysa4|Os08g33660.1  
AT1G18710,AT1G74430  
Orysa4|Os08g37970.1  
AT5G49330  
Orysa4|Os02g49240.1  
Orysa4|Os03g10310.1  
AT1G08400 Orysa4|Os07g48720.1  
AT3G47700 Orysa4|Os02g51330.1  
Orysa4|Os02g42540.1  
AT1G73350  
AT4G37830 Orysa4|Os03g56190.1  
Orysa4|Os01g34330.1  
AT4G11560  
AT4G23120,AT2G25120,AT3G43990  
AT1G08480 Orysa4|Os08g02080.1  
Orysa4|Os08g16610.1  
AT5G40840 Orysa4|Os04g41110.1  
Orysa4|Os01g67250.1  
AT5G16270  
AT3G49660  
AT4G02730 Orysa4|Os07g38430.1  
AT5G67320  
AT2G43770 Orysa4|Os06g44370.1  
AT4G29830 Orysa4|Os11g43890.1  
AT5G52820 Orysa4|Os11g38170.1,Orysa4|Os10g01540.1  
AT5G64730 Orysa4|Os02g33860.1  
AT5G16750 Orysa4|Os04g50660.1  
Orysa4|Os03g23909.1  
AT5G13480  
Orysa4|Os07g22220.1  
AT5G50230 Orysa4|Os03g53510.1  
Orysa4|Os07g14830.1  
AT1G71840 Orysa4|Os03g48090.1  
AT2G05720,AT2G41500  
Orysa4|Os03g51550.1  
Orysa4|Os04g31760.1  
AT4G32990,AT2G26060  
AT4G31790 Orysa4|Os03g23970.1  
AT2G29640 Orysa4|Os03g15850.1  
AT1G30460 Orysa4|Os06g46400.1

AT4G11970  
AT1G64790 Orysa4|Os03g51140.1  
AT3G63430 Orysa4|Os10g02690.1,Orysa4|Os11g37670.1  
AT5G55810 Orysa4|Os03g41470.1  
Orysa4|Os09g17870.1,Orysa4|Os02g56980.1  
Orysa4|Os01g55730.1  
AT3G02220  
AT4G31240  
Orysa4|Os11g11440.1  
Orysa4|Os03g29244.1  
Orysa4|Os01g58194.1  
AT1G60420 Orysa4|Os03g29240.1,Orysa4|Os03g29190.1  
AT1G79020,AT1G16690 Orysa4|Os08g25130.1  
AT3G07530 Orysa4|Os03g13960.1  
AT2G44730,AT4G17060,AT3G24860 Orysa4|Os04g45940.1,Orysa4|Os10g41460.1,Orysa4|Os08g37810.1  
AT5G49530 Orysa4|Os08g16780.1  
Orysa4|Os04g16819.1  
AT4G17220 Orysa4|Os03g11650.1  
AT2G01750,AT1G14840,AT1G68060,AT1G24764  
Orysa4|Os02g50320.1,Orysa4|Os06g14080.1,Orysa4|Os12g44340.1  
AT1G48260,AT3G17510 Orysa4|Os01g18800.1,Orysa4|Os05g04550.1,Orysa4|Os07g44290.1  
AT2G30040,AT1G07150  
AT1G53570 Orysa4|Os04g35700.1,Orysa4|Os02g35010.1,Orysa4|Os11g10100.1  
AT1G54960,AT1G09000  
AT2G41140,AT3G56760 Orysa4|Os07g44710.1,Orysa4|Os03g25070.1  
AT1G12580 Orysa4|Os06g03682.1  
AT4G24400  
Orysa4|Os05g36960.1  
AT1G76040 Orysa4|Os04g47300.1  
Orysa4|Os03g53880.1  
AT5G01820,AT2G30360,AT2G38490  
Orysa4|Os09g33910.1  
AT2G31500  
AT3G06030  
AT3G01090,AT3G29160 Orysa4|Os05g45420.1  
AT1G50700,AT3G20410  
Orysa4|Os04g59450.1  
Orysa4|Os03g40400.1  
Orysa4|Os07g09610.1  
AT1G79640 Orysa4|Os02g54900.1  
AT1G77720  
Orysa4|Os06g50030.1  
AT3G04810,AT5G28290,AT1G54510  
AT5G21326  
AT5G14720  
Orysa4|Os03g21580.1  
Orysa4|Os11g04170.1,Orysa4|Os12g03970.1  
AT3G46140,AT3G45790,AT3G45670,AT3G46160  
Orysa4|Os01g55440.1  
AT5G39440  
Orysa4|Os02g44642.1,Orysa4|Os04g47240.1  
AT1G63700  
Orysa4|Os03g17980.1  
Orysa4|Os03g50330.1  
Orysa4|Os11g02240.1  
AT5G66850 Orysa4|Os03g55560.1,Orysa4|Os07g02780.1  
AT4G09570,AT1G35670  
Orysa4|Os06g29120.1  
AT1G12680  
AT2G38910  
Orysa4|Os03g59390.1  
AT4G08500,AT4G08470 Orysa4|Os04g27100.1,Orysa4|Os03g49640.1  
AT5G01810  
AT5G19360,AT5G12180 Orysa4|Os01g59360.1  
AT4G04740,AT4G04720,AT4G21940,AT4G04710  
AT1G18350,AT1G73500,AT3G06230  
Orysa4|Os07g32400.1  
AT2G37840,AT3G53930 Orysa4|Os03g16130.1  
AT4G18700,AT5G45810,AT2G34180,AT1G29230 Orysa4|Os05g43840.1,Orysa4|Os01g55450.1  
AT3G21220,AT1G51660 Orysa4|Os06g09180.1,Orysa4|Os02g54600.1  
AT3G51850 Orysa4|Os01g61590.1  
AT5G67080,AT3G50310,AT2G41910,AT2G05060,AT5G27790,AT2G34290,AT2G41920,AT5G12090,AT5G27510,AT2G42550,AT2G41930,AT2G40560,AT2G40500,AT2G40580  
AT3G61960 Orysa4|Os03g02980.1  
Orysa4|Os03g22050.1,Orysa4|Os07g48100.1,Orysa4|Os05g26820.1  
Orysa4|Os12g41180.1  
Orysa4|Os01g43410.1,Orysa4|Os05g50810.1  
AT2G41860,AT3G57530  
AT1G60940,AT1G10940 Orysa4|Os02g34600.1,Orysa4|Os04g35240.1  
AT5G56580 Orysa4|Os01g32660.1  
AT1G08650,AT3G04530 Orysa4|Os04g43710.1,Orysa4|Os02g41580.1,Orysa4|Os02g56310.1  
Orysa4|Os10g39420.1,Orysa4|Os03g03660.1



Orysa4|Os01g10870.1  
AT1G78290  
AT2G43930 Orysa4|Os02g41980.1  
AT4G23650  
Orysa4|Os02g06570.1,Orysa4|Os01g60910.1  
AT5G40440 Orysa4|Os06g27890.1  
Orysa4|Os02g04240.1  
Orysa4|Os07g33110.1  
AT4G38230,AT4G35310,AT2G17290 Orysa4|Os04g49510.1,Orysa4|Os02g46090.1  
AT5G60550,AT3G45240  
AT4G30960 Orysa4|Os08g34240.1,Orysa4|Os09g25100.1  
AT1G23700,AT1G70430  
AT3G44200  
AT2G26980  
Orysa4|Os07g08000.1  
Orysa4|Os05g39890.1  
AT1G32320 Orysa4|Os02g46760.1  
Orysa4|Os09g21510.1,Orysa4|Os08g32600.1  
AT5G55090,AT4G26890,AT1G05100,AT2G32510  
AT5G23580 Orysa4|Os12g07230.1,Orysa4|Os11g07040.1  
AT5G57565,AT5G57630 Orysa4|Os02g08140.1  
Orysa4|Os09g29170.1  
AT2G35890  
Orysa4|Os03g57510.1,Orysa4|Os07g06740.1  
AT4G10730,AT4G24100 Orysa4|Os10g37480.1,Orysa4|Os03g02320.1  
AT1G01140,Orysa4|Os03g03510.1  
AT5G45820 Orysa4|Os01g10890.1  
Orysa4|Os07g48090.1,Orysa4|Os05g26940.1  
AT5G04510,AT3G10540 Orysa4|Os01g65230.1  
AT4G36070,AT2G17890,AT5G66210 Orysa4|Os02g03410.1,Orysa4|Os07g22710.1  
AT1G69220  
Orysa4|Os01g64490.1  
Orysa4|Os01g18150.1,Orysa4|Os01g42400.1,Orysa4|Os03g50550.1  
AT5G07070,AT5G58380  
AT3G20860 Orysa4|Os02g37830.1  
AT3G50530 Orysa4|Os07g42770.1  
AT4G26070  
Orysa4|Os05g39900.1  
AT5G24430,AT3G49370  
Orysa4|Os05g41090.1  
AT2G45490 Orysa4|Os03g55620.1  
Orysa4|Os10g04000.1,Orysa4|Os10g04010.1,Orysa4|Os01g50420.1,Orysa4|Os01g50410.1,Orysa4|Os01g50370.1,Orysa4|Os01g50400.1,Orysa4|Os05g46760.1,Orysa4|Os05g46750.1,Orysa4|Os02g21700.1  
AT5G10930,AT5G25110,AT2G25090 Orysa4|Os09g25090.1  
AT4G14580,AT3G23000 Orysa4|Os03g43440.1,Orysa4|Os12g41090.1  
Orysa4|Os02g08240.1  
AT1G02970  
AT2G46700  
AT4G40010  
Orysa4|Os05g35760.1  
AT3G12200  
AT5G12480,AT5G19450 Orysa4|Os07g38120.1  
AT4G04700,AT4G04695  
AT4G32830,AT2G25880 Orysa4|Os01g09580.1  
AT2G23030  
AT3G08720,AT3G08730 Orysa4|Os07g48290.1,Orysa4|Os03g21620.1  
Orysa4|Os05g35770.1  
AT4G29810 Orysa4|Os06g05520.1  
Orysa4|Os03g49750.1  
AT3G50500,AT5G66880  
Orysa4|Os11g03970.1,Orysa4|Os12g03810.1  
Orysa4|Os07g48760.1,Orysa4|Os03g20380.1  
Orysa4|Os02g58520.1  
AT4G14480 Orysa4|Os03g47470.1  
Orysa4|Os07g47950.1  
Orysa4|Os04g58990.1  
AT1G61950  
AT1G50230  
Orysa4|Os10g03260.1  
Orysa4|Os10g36710.1  
AT3G15220  
Orysa4|Os01g64970.1  
AT5G35410 Orysa4|Os06g40370.1  
AT5G20930  
AT5G63650,AT5G08590  
AT3G63280  
Orysa4|Os10g06510.1,Orysa4|Os10g06580.1,Orysa4|Os10g06560.1,Orysa4|Os10g06950.1,Orysa4|Os10g06800.1,Orysa4|Os10g03480.1,Orysa4|Os10g06930.1  
AT1G74740,AT1G18890 Orysa4|Os03g48270.1  
AT1G30270 Orysa4|Os07g05620.1  
Orysa4|Os10g41490.1  
AT3G10660,AT5G04870 Orysa4|Os03g57450.1

AT4G33950 Orysa4|Os12g39630.1,Orysa4|Os03g55600.1  
AT3G19100,AT1G49580  
Orysa4|Os12g30300.1,Orysa4|Os12g30150.1  
AT1G49180  
AT2G20060 Orysa4|Os12g30490.1,Orysa4|Os11g37510.1  
AT1G31220 Orysa4|Os05g18790.1,Orysa4|Os06g22560.1  
Orysa4|Os03g19360.1,Orysa4|Os01g08350.1  
AT2G07698  
Orysa4|Os12g23630.1,Orysa4|Os09g08910.1  
Orysa4|Os10g21240.1,Orysa4|Os09g08880.1,Orysa4|Os03g48471.1  
Orysa4|Os04g16740.1,Orysa4|Os10g38270.1  
AT3G02800,AT5G16480 Orysa4|Os12g23190.1  
Orysa4|Os02g53160.1  
Orysa4|Os09g05020.1  
AT2G32960,AT1G05000,AT4G03960  
Orysa4|Os06g10650.1  
AT3G05040 Orysa4|Os01g26160.1  
AT5G18400 Orysa4|Os04g57810.1  
AT2G46080,AT4G01360,AT1G01550 Orysa4|Os10g36950.1  
Orysa4|Os04g57760.1  
AT3G61500  
AT1G07980 Orysa4|Os03g63530.1  
AT4G25610 Orysa4|Os09g39660.1  
AT1G21840 Orysa4|Os02g07150.1  
AT4G37300  
Orysa4|Os05g37830.1  
Orysa4|Os03g15920.1  
AT2G41020  
Orysa4|Os01g68760.1  
AT5G51700 Orysa4|Os02g33180.1  
AT1G14300 Orysa4|Os10g26660.1  
AT4G26410 Orysa4|Os03g20860.1  
AT2G45060 Orysa4|Os02g01450.1  
Orysa4|Os02g43750.1  
AT5G43130,AT1G27720 Orysa4|Os03g32590.1  
Orysa4|Os09g20330.1  
AT5G12380 Orysa4|Os01g31270.1  
Orysa4|Os09g23160.1  
Orysa4|Os09g27990.1  
AT1G68090  
AT2G38750 Orysa4|Os05g31750.1  
AT2G38760 Orysa4|Os07g46550.1,Orysa4|Os05g31760.1  
AT5G10220,AT5G10230,AT5G65020,AT1G35720 Orysa4|Os06g11800.1  
AT1G58227  
AT1G58230 Orysa4|Os06g46480.1  
AT3G18524 Orysa4|Os05g19270.1  
AT4G33690 Orysa4|Os08g09300.1,Orysa4|Os07g11290.1  
AT1G48950 Orysa4|Os01g42080.1  
AT1G17210 Orysa4|Os03g57160.1,Orysa4|Os07g05610.1  
Orysa4|Os08g03630.1  
AT1G21540,AT1G21530,AT1G77240,AT5G16370,AT5G16340,AT1G75960 Orysa4|Os04g57850.1  
Orysa4|Os03g03790.1,Orysa4|Os09g38350.1  
AT1G76290  
AT3G16910 Orysa4|Os03g19240.1  
AT1G20560,AT2G17650  
Orysa4|Os01g24030.1,Orysa4|Os02g02700.1,Orysa4|Os03g04130.1,Orysa4|Os03g04120.1  
AT1G65890,AT1G65880,AT1G68270,AT1G66120  
AT2G40780 Orysa4|Os03g02310.1  
AT5G11010 Orysa4|Os01g25260.1,Orysa4|Os01g25240.1  
AT3G55510 Orysa4|Os12g06610.1  
AT2G18220 Orysa4|Os10g35280.1  
AT4G13530,AT4G10080 Orysa4|Os02g35220.1,Orysa4|Os01g66150.1  
AT2G02060,AT1G14590 Orysa4|Os02g46120.1,Orysa4|Os04g49590.1  
AT1G28710,AT1G28700,AT1G28695 Orysa4|Os03g52160.1  
AT5G44820,AT4G19970,AT4G15970  
AT5G40900  
Orysa4|Os01g69190.1,Orysa4|Os01g69160.1,Orysa4|Os01g69140.1,Orysa4|Os01g69200.1,Orysa4|Os03g63280.1,Orysa4|Os08g41800.1,Orysa4|Os03g63270.1,Orysa4|Os07g19444.1  
Orysa4|Os03g03730.1  
AT3G48550 Orysa4|Os02g30380.1  
AT1G55750,AT3G61420 Orysa4|Os08g25060.1  
AT3G05720  
AT4G16143,AT3G06720 Orysa4|Os01g14950.1  
AT5G03070 Orysa4|Os01g06470.1  
Orysa4|Os01g24060.1  
Orysa4|Os05g06350.1  
AT1G02690,AT4G02150  
Orysa4|Os07g48880.1  
AT1G09270  
AT1G32880,AT5G52000,AT5G49310  
AT4G13250  
Orysa4|Os07g05250.1

AT5G04900 Orysa4|Os03g45194.1  
Orysa4|Os01g12710.1  
Orysa4|Os11g05140.1,Orysa4|Os01g58880.1  
AT5G22760,AT5G35210 Orysa4|Os11g05130.1  
AT5G12400 Orysa4|Os07g46690.1  
Orysa4|Os03g11220.1  
AT1G13930,AT2G03440  
AT5G65540 Orysa4|Os03g58780.1  
AT5G18580 Orysa4|Os05g05710.1  
AT2G36145 Orysa4|Os01g64270.1  
AT5G58760 Orysa4|Os01g04870.1  
AT4G26980 Orysa4|Os06g46590.1  
AT2G31270,AT3G54710 Orysa4|Os04g10650.1,Orysa4|Os01g08880.1  
Orysa4|Os10g34820.1  
AT3G60150,AT2G44525 Orysa4|Os10g42090.1  
AT2G26930 Orysa4|Os01g58790.1  
AT4G10640,AT1G01110,AT4G00820 Orysa4|Os08g02250.1  
AT3G17660  
Orysa4|Os07g37650.1  
AT5G54310  
AT5G60170,AT3G45630,AT2G28540 Orysa4|Os12g01190.1,Orysa4|Os11g01190.1,Orysa4|Os01g11130.1  
AT1G58290,AT1G09940,AT2G31250 Orysa4|Os10g35840.1  
AT2G26590 Orysa4|Os05g51640.1  
AT2G39530 Orysa4|Os11g34730.1  
AT5G16630 Orysa4|Os08g33082.1  
AT3G14590,AT1G53590 Orysa4|Os02g20970.1,Orysa4|Os01g14050.1  
AT1G43580 Orysa4|Os02g33830.1,Orysa4|Os04g34620.1  
AT3G27310 Orysa4|Os04g40870.1  
Orysa4|Os10g23160.1  
AT3G19270 Orysa4|Os09g28390.1,Orysa4|Os08g36860.1  
Orysa4|Os12g18820.1,Orysa4|Os03g45619.1,Orysa4|Os10g19140.1,Orysa4|Os10g10040.1  
AT1G12740 Orysa4|Os02g45280.1,Orysa4|Os04g48170.1  
AT3G30180,AT5G38970 Orysa4|Os03g40540.1  
AT1G19630 Orysa4|Os05g01120.1  
Orysa4|Os03g61980.1  
AT2G42850  
Orysa4|Os07g29960.1,Orysa4|Os04g48200.1  
AT5G05690 Orysa4|Os12g04480.1,Orysa4|Os11g04710.1  
Orysa4|Os04g48210.1  
AT4G19230,AT5G45340 Orysa4|Os02g47470.1  
Orysa4|Os07g04410.1  
Orysa4|Os10g10050.1  
AT1G65670,AT4G15300,AT3G30290,AT4G15393,AT4G15396,AT4G15310,AT1G78490,AT5G48000,AT3G44970,AT1  
G55940  
Orysa4|Os10g23180.1  
AT3G50660,AT5G14400,AT1G73340  
AT4G36380  
Orysa4|Os10g19110.1,Orysa4|Os03g45528.1  
AT3G13730 Orysa4|Os05g11130.1,Orysa4|Os01g10040.1  
AT2G32440,AT1G05160 Orysa4|Os06g02019.1  
AT2G29090  
AT5G66810 Orysa4|Os10g24070.1  
AT1G13030 Orysa4|Os12g19040.1  
AT3G50690 Orysa4|Os03g46600.1,Orysa4|Os07g41694.1  
AT5G59350,AT2G39560 Orysa4|Os11g47730.1  
AT4G35510,AT2G17540,AT5G66000 Orysa4|Os06g51240.1  
AT1G13190  
AT5G55670 Orysa4|Os04g39250.1  
Orysa4|Os01g54420.1  
AT1G53140  
AT1G48460  
AT5G63040 Orysa4|Os01g50830.1  
AT4G37210 Orysa4|Os07g03070.1  
AT3G51660  
AT5G01650 Orysa4|Os12g01680.1,Orysa4|Os11g01600.1  
AT5G57170  
AT3G52105 Orysa4|Os03g07870.1  
AT3G02360 Orysa4|Os06g02144.1  
AT1G64190,AT5G41670 Orysa4|Os11g29400.1  
AT5G47040 Orysa4|Os09g36300.1  
AT3G05780,AT3G05790,AT5G26860 Orysa4|Os07g48960.1  
Orysa4|Os03g43940.1  
AT3G20557,AT1G50930 Orysa4|Os04g53560.1  
AT3G21710  
AT5G54790 Orysa4|Os07g34020.1  
AT5G10210,AT5G65030 Orysa4|Os04g38320.1,Orysa4|Os07g43130.1  
AT1G04230,AT5G43720 Orysa4|Os03g58340.1  
AT1G18270  
Orysa4|Os06g14740.1  
AT3G26080,AT3G26070  
Orysa4|Os03g49720.1  
AT1G63390,AT1G63370,AT1G62620,AT1G62600,AT1G65860,AT1G62540,AT1G62560,AT1G62570,AT1G12140,AT1

G12130,AT1G12160,AT1G63340,AT1G62580,AT1G12200 Orysa4|Os10g40570.1  
AT5G61290,AT5G07800  
Orysa4|Os07g02100.1,Orysa4|Os07g02120.1,Orysa4|Os01g26876.1,Orysa4|Os07g02130.1,Orysa4|Os07  
g02140.1,Orysa4|Os06g23800.1  
Orysa4|Os10g40610.1  
AT1G63310 Orysa4|Os01g01680.1,Orysa4|Os04g01500.1  
Orysa4|Os04g04050.1  
Orysa4|Os03g15420.1,Orysa4|Os04g04060.1  
AT1G60530  
AT1G60500,AT1G60540  
AT1G48300 Orysa4|Os05g04620.1  
AT3G26650,AT1G12900 Orysa4|Os04g38600.1  
AT1G42970  
AT1G26170 Orysa4|Os06g16280.1  
AT3G46860 Orysa4|Os05g25630.1  
AT5G43570,AT3G50020,AT5G43580,AT2G38900,AT2G38870 Orysa4|Os06g21540.1  
AT5G11090,AT5G25280,AT5G20370 Orysa4|Os02g55600.1  
AT1G28530 Orysa4|Os02g01970.1  
AT5G09930,AT5G64840 Orysa4|Os11g39020.1  
Orysa4|Os04g56330.1  
AT1G64550 Orysa4|Os02g58020.1  
Orysa4|Os08g45010.1,Orysa4|Os09g39910.1  
AT5G60790  
AT3G54540 Orysa4|Os03g32630.1  
AT5G50340 Orysa4|Os06g05820.1  
AT3G14120 Orysa4|Os11g42420.1  
AT5G09880 Orysa4|Os03g05830.1  
AT2G16940  
AT1G17620,AT5G11890 Orysa4|Os01g09880.1,Orysa4|Os05g11010.1,Orysa4|Os01g39290.1  
Orysa4|Os02g16030.1  
Orysa4|Os09g39462.1  
AT3G56680,AT2G40960,AT5G05100,AT3G10770 Orysa4|Os05g34070.1  
Orysa4|Os03g07850.1  
AT1G51310  
AT1G61000 Orysa4|Os03g45770.1  
Orysa4|Os01g21280.1  
Orysa4|Os03g17432.1  
Orysa4|Os05g32370.1  
AT1G27900 Orysa4|Os11g20554.1  
AT2G47680 Orysa4|Os01g15300.1  
AT1G32490,AT2G35340 Orysa4|Os08g24760.1  
AT5G10370,AT4G01020 Orysa4|Os07g42900.1  
AT3G26560 Orysa4|Os02g19860.1  
Orysa4|Os06g23530.1  
AT5G13010  
Orysa4|Os06g09280.1  
Orysa4|Os07g32430.1  
AT2G47250,AT3G62310  
AT4G18465 Orysa4|Os01g11370.1  
AT4G16680  
Orysa4|Os11g31630.1  
Orysa4|Os08g09990.1  
AT1G26370  
AT1G33390 Orysa4|Os02g50370.1  
AT5G14900 Orysa4|Os11g09060.1  
AT1G76730 Orysa4|Os12g07020.1  
AT3G17340 Orysa4|Os11g47130.1,Orysa4|Os11g47320.1  
AT5G43280  
AT3G15290  
AT4G29010 Orysa4|Os02g17390.1  
AT4G16800  
Orysa4|Os05g29880.1  
Orysa4|Os02g43710.1,Orysa4|Os02g43720.1  
AT3G06860 Orysa4|Os05g06300.1,Orysa4|Os01g24680.1  
AT5G28050  
AT3G05300  
Orysa4|Os07g14150.1,Orysa4|Os03g61810.1  
AT1G34380 Orysa4|Os01g65400.1  
AT5G02850 Orysa4|Os11g05150.1,Orysa4|Os09g36890.1  
AT3G55080 Orysa4|Os01g74500.1  
Orysa4|Os03g21570.1,Orysa4|Os03g21700.1,Orysa4|Os03g45730.1  
Orysa4|Os10g29560.1  
Orysa4|Os03g21610.1  
AT4G17410,AT5G47430  
Orysa4|Os01g09810.1,Orysa4|Os03g52910.1  
AT5G13720 Orysa4|Os07g46330.1  
AT4G19390 Orysa4|Os06g49640.1  
AT1G32583  
AT4G24972 Orysa4|Os12g28750.1  
Orysa4|Os10g14020.1  
AT4G14070,AT3G23790 Orysa4|Os03g62850.1  
AT3G05210 Orysa4|Os10g37490.1

AT5G56130 Orysa4|Os03g32020.1,Orysa4|Os09g12710.1  
AT3G51780 Orysa4|Os01g61500.1  
AT5G62100,AT5G07220,AT5G52060 Orysa4|Os08g43270.1,Orysa4|Os06g03640.1  
AT5G40630,AT5G14360  
Orysa4|Os04g40790.1,Orysa4|Os04g40680.1,Orysa4|Os02g38410.1,Orysa4|Os01g67950.1  
Orysa4|Os04g52890.1  
AT5G37530 Orysa4|Os06g14040.1  
AT5G11650,Orysa4|Os01g10250.1  
AT1G18360,AT1G73480 Orysa4|Os03g51010.1,Orysa4|Os09g23150.1  
Orysa4|Os04g25300.1,Orysa4|Os10g05650.1,Orysa4|Os07g03490.1,Orysa4|Os07g03400.1,Orysa4|Os07g03310.1,Orysa4|Os06g30700.1,Orysa4|Os07g31990.1,Orysa4|Os12g14360.1,Orysa4|Os11g30240.1,Orysa4|Os03g41570.1,Orysa4|Os09g03160.1,Orysa4|Os09g08590.1,Orysa4|Os02g27420.1,Orysa4|Os02g17550.1,Orysa4|Os11g32660.1,Orysa4|Os03g44590.1,Orysa4|Os05g41040.1,Orysa4|Os09g01370.1,Orysa4|Os01g28400.1,Orysa4|Os09g20380.1,Orysa4|Os06g20750.1,Orysa4|Os08g25960.1,Orysa4|Os07g12950.1,Orysa4|Os01g41580.1,Orysa4|Os11g1770.1,Orysa4|Os10g01790.1,Orysa4|Os11g07080.1,Orysa4|Os01g41590.1,Orysa4|Os12g35430.1  
AT5G34860  
Orysa4|Os07g39460.1  
Orysa4|Os07g45210.1  
Orysa4|Os02g09900.1,Orysa4|Os10g01550.1  
Orysa4|Os07g40760.1,Orysa4|Os02g48930.1,Orysa4|Os04g27730.1,Orysa4|Os01g22730.1,Orysa4|Os08g16770.1  
AT2G06908 Orysa4|Os04g25310.1  
Orysa4|Os07g23860.1  
AT1G43660 Orysa4|Os11g41620.1  
AT2G14570  
AT2G15020 Orysa4|Os03g25850.1  
Orysa4|Os12g30020.1  
Orysa4|Os02g04010.1,Orysa4|Os02g24190.1  
AT4G19560  
AT1G27630  
AT5G45190,AT4G19600  
AT1G35440  
AT2G26430 Orysa4|Os11g05850.1  
AT1G72620,AT1G17430  
AT4G33180,AT5G21950 Orysa4|Os01g07420.1,Orysa4|Os07g42140.1,Orysa4|Os03g08090.1  
Orysa4|Os03g08110.1  
AT1G78210,AT5G09430,AT4G39955 Orysa4|Os07g42994.1,Orysa4|Os03g27110.1,Orysa4|Os10g22960.1  
AT1G04480,AT2G33370,AT3G04400  
Orysa4|Os10g32920.1,Orysa4|Os03g04590.1,Orysa4|Os02g56960.1  
Orysa4|Os06g45580.1  
Orysa4|Os05g36310.1,Orysa4|Os01g64620.1  
Orysa4|Os06g34620.1,Orysa4|Os06g34860.1,Orysa4|Os06g34650.1  
Orysa4|Os06g16940.1  
AT1G24580 Orysa4|Os09g30160.1,Orysa4|Os08g38460.1  
Orysa4|Os09g36500.1,Orysa4|Os03g05560.1,Orysa4|Os12g24530.1,Orysa4|Os12g24490.1,Orysa4|Os06g34560.1,Orysa4|Os06g34880.1,Orysa4|Os04g16970.1,Orysa4|Os06g34640.1  
Orysa4|Os06g34430.1  
AT4G24015  
AT1G49230,AT1G49200,AT1G49220,AT1G49210,AT3G18773 Orysa4|Os02g33720.1,Orysa4|Os04g34230.1  
Orysa4|Os06g14640.1,Orysa4|Os06g14650.1,Orysa4|Os05g39940.1,Orysa4|Os01g11520.1,Orysa4|Os02g08200.1,Orysa4|Os01g20910.1,Orysa4|Os06g16060.1  
Orysa4|Os07g34180.1,Orysa4|Os01g49570.1,Orysa4|Os01g11500.1,Orysa4|Os05g46680.1,Orysa4|Os12g10450.1  
AT4G35480,AT2G17450  
Orysa4|Os03g44636.1,Orysa4|Os03g44642.1,Orysa4|Os07g48680.1,Orysa4|Os03g08920.1,Orysa4|Os03g05570.1  
AT1G22500,AT1G72200,AT5G27420,AT3G05200,AT4G09120,AT4G09110,AT4G09130,AT1G35330,AT2G34990,AT2G35000,AT4G09100  
Orysa4|Os08g37760.1,Orysa4|Os06g11450.1,Orysa4|Os02g52210.1,Orysa4|Os02g36300.1,Orysa4|Os04g37730.1,Orysa4|Os02g36320.1  
AT2G18670,AT4G30370,AT3G19140,AT3G14320  
Orysa4|Os02g36330.1,Orysa4|Os04g37740.1,Orysa4|Os09g29370.1  
AT5G01880,AT3G10910,AT5G05280 Orysa4|Os05g40020.1  
AT5G58580 Orysa4|Os01g11490.1,Orysa4|Os05g11860.1  
AT2G46160,AT3G61550 Orysa4|Os01g53500.1,Orysa4|Os05g45060.1  
Orysa4|Os07g29600.1  
AT1G76410,AT1G20823 Orysa4|Os10g39450.1  
AT4G35840,AT2G17730,AT5G66070 Orysa4|Os10g39770.1  
AT5G07040  
AT1G74410 Orysa4|Os02g50990.1,Orysa4|Os06g12560.1  
Orysa4|Os02g14990.1  
Orysa4|Os02g44700.1  
AT2G20030,AT4G28890 Orysa4|Os05g51780.1  
AT5G10380  
Orysa4|Os01g11480.1,Orysa4|Os01g11460.1,Orysa4|Os02g15120.1,Orysa4|Os05g39260.1,Orysa4|Os01g61470.1,Orysa4|Os06g06150.1,Orysa4|Os06g34400.1,Orysa4|Os02g15020.1,Orysa4|Os02g15080.1  
Orysa4|Os11g05300.1,Orysa4|Os12g05370.1  
AT2G35910,AT5G06490 Orysa4|Os07g06560.1,Orysa4|Os03g57410.1  
Orysa4|Os02g15000.1,Orysa4|Os02g15010.1  
Orysa4|Os02g58540.1  
Orysa4|Os08g44950.1

Orysa4|Os02g45780.1,Orysa4|Os04g49160.1,Orysa4|Os08g06090.1,Orysa4|Os07g23970.1  
Orysa4|Os07g06540.1,Orysa4|Os12g42540.1  
AT5G42200  
Orysa4|Os09g37050.1  
AT4G15975  
Orysa4|Os06g50370.1,Orysa4|Os08g43670.1  
AT5G47610,AT4G17245 Orysa4|Os02g01700.1  
Orysa4|Os03g30020.1,Orysa4|Os12g02350.1  
AT2G47560,AT3G62690  
AT2G34000 Orysa4|Os01g55110.1  
Orysa4|Os12g02220.1,Orysa4|Os11g02260.1  
Orysa4|Os04g49170.1  
Orysa4|Os02g15100.1,Orysa4|Os06g09310.1,Orysa4|Os05g15170.1  
AT4G33565  
AT1G53010  
Orysa4|Os11g39640.1  
Orysa4|Os11g47690.1  
AT3G18930 Orysa4|Os12g40460.1  
AT2G42350,AT2G42360 Orysa4|Os06g34360.1  
AT5G41450,AT5G41430,AT5G41440,AT1G51930,AT3G43430,AT5G20885,AT2G28920,AT4G00305  
AT2G27940  
Orysa4|Os02g33640.1,Orysa4|Os10g41660.1,Orysa4|Os04g49700.1,Orysa4|Os02g46340.1  
AT4G38140,AT4G40070  
Orysa4|Os02g45390.1  
AT4G11370  
Orysa4|Os03g28040.1,Orysa4|Os03g27360.1  
AT2G35420  
Orysa4|Os03g22080.1,Orysa4|Os03g22110.1,Orysa4|Os05g29676.1,Orysa4|Os05g29710.1,Orysa4|Os05  
g29150.1,Orysa4|Os02g37450.1,Orysa4|Os03g28080.1,Orysa4|Os07g42610.1,Orysa4|Os11g47700.1  
AT5G05810 Orysa4|Os05g07140.1  
Orysa4|Os12g01750.1  
AT4G10150,AT4G10160 Orysa4|Os02g35144.1  
AT3G16720  
AT5G41400 Orysa4|Os04g49000.1  
AT4G17920 Orysa4|Os10g42390.1  
AT3G03550,AT5G17600 Orysa4|Os04g50100.1  
AT1G04360,AT5G43420 Orysa4|Os02g57460.1  
AT3G11110 Orysa4|Os09g38110.1  
AT2G37580  
Orysa4|Os02g35329.1,Orysa4|Os02g35383.1,Orysa4|Os02g35401.1,Orysa4|Os02g35429.1,Orysa4|Os02  
g35347.1,Orysa4|Os02g35440.1,Orysa4|Os02g45440.1,Orysa4|Os12g42530.1  
AT3G60966  
AT1G64690 Orysa4|Os10g41300.1  
AT3G20350,AT1G50660 Orysa4|Os08g09170.1,Orysa4|Os04g53350.1,Orysa4|Os05g41910.1  
AT1G11690  
Orysa4|Os07g01230.1  
AT5G23395 Orysa4|Os04g44550.1  
AT2G15350,AT2G15370,AT2G15390,AT1G14080,AT1G14110,AT1G14070,AT2G03220,AT2G03210,AT1G74420  
Orysa4|Os10g03650.1,Orysa4|Os02g52630.1,Orysa4|Os06g10960.1,Orysa4|Os06g10950.1,Orysa4|Os06  
g10930.1,Orysa4|Os06g10910.1,Orysa4|Os06g10970.1,Orysa4|Os02g52610.1,Orysa4|Os02g17600.1,Orysa4|Os02g  
17534.1  
Orysa4|Os04g37650.1,Orysa4|Os04g37640.1,Orysa4|Os02g25630.1,Orysa4|Os06g10980.1,Orysa4|Os02  
g52590.1,Orysa4|Os08g24750.1,Orysa4|Os06g10920.1,Orysa4|Os09g28460.1  
AT2G15360 Orysa4|Os03g50800.1  
Orysa4|Os02g17590.1  
AT1G68080 Orysa4|Os03g13550.1  
AT1G27410 Orysa4|Os01g57440.1  
AT4G11980 Orysa4|Os06g03910.1  
AT5G04760,AT5G23650  
AT5G56840  
Orysa4|Os05g37050.1,Orysa4|Os05g37060.1,Orysa4|Os05g37040.1,Orysa4|Os01g64360.1  
AT1G49010  
AT4G36570 Orysa4|Os12g33950.1,Orysa4|Os02g47744.1  
Orysa4|Os08g05510.1  
Orysa4|Os06g07640.1  
Orysa4|Os05g10690.1,Orysa4|Os01g09640.1,Orysa4|Os05g51160.1,Orysa4|Os01g41900.1  
Orysa4|Os04g27410.1,Orysa4|Os01g34060.1,Orysa4|Os03g62100.1  
AT3G10580,AT4G09450,AT3G10585,AT3G10590,AT5G47290,AT3G10595  
AT4G39250,AT2G21650 Orysa4|Os01g44370.1  
AT5G08520 Orysa4|Os04g58020.1  
Orysa4|Os08g04840.1  
Orysa4|Os03g63890.1  
Orysa4|Os05g50350.1,Orysa4|Os01g44390.1  
AT1G19510,AT1G75250  
AT5G61620  
AT5G01200,AT2G38090,AT5G58900,AT5G05790,AT3G11280  
Orysa4|Os01g63460.1,Orysa4|Os05g37730.1,Orysa4|Os01g04930.1  
Orysa4|Os01g47370.1,Orysa4|Os05g49240.1  
AT1G70000,AT1G74840,AT1G19000  
AT2G21440  
Orysa4|Os03g58720.1  
AT4G20920,AT4G20910 Orysa4|Os07g06970.1

AT1G72640 Orysa4|Os03g29730.1  
AT5G54730 Orysa4|Os01g57720.1  
AT1G54710 Orysa4|Os05g33610.1  
AT1G03380  
AT5G49910,AT4G24280 Orysa4|Os05g23740.1  
AT5G09600  
AT3G12580 Orysa4|Os05g38530.1,Orysa4|Os01g62290.1  
Orysa4|Os11g08470.1,Orysa4|Os11g08440.1,Orysa4|Os11g08460.1  
AT5G42020,AT5G28540 Orysa4|Os02g02410.1  
AT2G32120 Orysa4|Os03g11910.1  
AT4G37910  
Orysa4|Os09g31486.1  
Orysa4|Os08g09770.1,Orysa4|Os05g35400.1,Orysa4|Os05g30480.1  
Orysa4|Os01g49430.1  
AT1G11660 Orysa4|Os06g46600.1  
AT1G16030  
AT5G02500,AT5G02490,AT3G09440,AT1G56410  
Orysa4|Os03g50250.1  
Orysa4|Os03g16920.1  
Orysa4|Os11g47370.1  
Orysa4|Os06g10990.1  
Orysa4|Os12g05760.1  
Orysa4|Os03g60620.1,Orysa4|Os11g47760.1  
Orysa4|Os12g38180.1  
AT1G79920,AT1G79930 Orysa4|Os05g08840.1  
Orysa4|Os12g14070.1  
AT4G16660 Orysa4|Os02g48110.1  
Orysa4|Os03g16880.1  
AT1G09080  
AT5G09590 Orysa4|Os03g02260.1,Orysa4|Os02g53420.1  
AT4G21445 Orysa4|Os04g54320.1  
AT1G35550 Orysa4|Os03g08010.1,Orysa4|Os03g08050.1,Orysa4|Os03g08060.1  
AT1G18070 Orysa4|Os02g25870.1,Orysa4|Os04g20220.1  
Orysa4|Os04g58140.1  
AT5G10630 Orysa4|Os04g50870.1,Orysa4|Os01g02720.1  
AT1G07920,AT1G07930,AT1G07940,AT5G60390  
AT5G06440,AT3G11720 Orysa4|Os11g36070.1  
AT3G13990 Orysa4|Os03g29750.1,Orysa4|Os06g10430.1  
AT1G50670 Orysa4|Os02g06890.1  
AT5G28440  
AT3G61480,AT5G28350 Orysa4|Os02g54500.1  
AT3G58630 Orysa4|Os01g48320.1,Orysa4|Os05g48690.1  
AT3G11100,AT5G05550  
Orysa4|Os11g34800.1,Orysa4|Os03g18340.1,Orysa4|Os03g18330.1,Orysa4|Os01g52090.1  
AT3G14180,AT1G54060 Orysa4|Os02g35690.1  
AT4G36620,AT3G50870,AT2G18380 Orysa4|Os05g49280.1,Orysa4|Os01g47360.1,Orysa4|Os05g50270.1  
AT2G45050,AT3G60530  
Orysa4|Os02g43150.1  
Orysa4|Os11g08410.1,Orysa4|Os03g03850.1  
Orysa4|Os12g42970.1  
AT3G24050  
Orysa4|Os09g08150.1,Orysa4|Os10g40810.1  
AT1G08000,AT1G08010,AT2G28340,AT3G45170  
AT3G54810  
Orysa4|Os01g54210.1  
AT3G51080,AT5G66320  
AT4G26150,AT5G56860  
AT3G20750 Orysa4|Os02g47100.1,Orysa4|Os12g07120.1,Orysa4|Os10g32070.1  
AT5G26930 Orysa4|Os06g37450.1,Orysa4|Os02g12790.1,Orysa4|Os01g74540.1  
AT4G34680  
Orysa4|Os05g06340.1,Orysa4|Os01g24070.1  
Orysa4|Os03g05160.1  
Orysa4|Os02g56250.1  
AT4G36240  
AT5G25830,AT4G32890  
AT5G49300,AT3G06740  
AT5G26040 Orysa4|Os06g37420.1  
AT3G60570,AT2G45110  
AT2G37640,AT5G02260  
AT1G20190 Orysa4|Os04g15840.1  
Orysa4|Os12g36040.1,Orysa4|Os08g44790.1  
Orysa4|Os10g30330.1,Orysa4|Os03g31480.1,Orysa4|Os03g06060.1,Orysa4|Os03g06050.1,Orysa4|Os03g06040.1,Orysa4|Os10g30340.1,Orysa4|Os03g06020.1,Orysa4|Os03g06000.1  
Orysa4|Os04g44780.1  
AT1G65680  
Orysa4|Os03g44290.1,Orysa4|Os04g46630.1,Orysa4|Os02g44106.1,Orysa4|Os02g44108.1,Orysa4|Os04g46650.1  
Orysa4|Os02g16809.1,Orysa4|Os02g16839.1,Orysa4|Os02g16850.1,Orysa4|Os02g16780.1,Orysa4|Os02g16800.1,Orysa4|Os02g16730.1,Orysa4|Os06g50400.1  
AT3G03220 Orysa4|Os04g49410.1  
Orysa4|Os07g31390.1

AT5G39270,AT5G39290,AT5G39300,AT5G39280,AT5G39310,AT5G39260  
AT2G28950,AT3G55500,AT2G39700 Orysa4|Os03g60720.1  
AT4G38210 Orysa4|Os06g41700.1  
AT3G15370  
AT4G28250,AT2G20750 Orysa4|Os02g42650.1  
AT1G12560,AT1G62980 Orysa4|Os06g01920.1  
Orysa4|Os10g40710.1,Orysa4|Os03g01270.1,Orysa4|Os10g40700.1,Orysa4|Os10g40720.1,Orysa4|Os10  
g40730.1,Orysa4|Os03g01260.1,Orysa4|Os03g01650.1,Orysa4|Os03g01610.1,Orysa4|Os03g01630.1  
AT4G17030  
AT1G69530,AT1G26770,AT2G03090,AT3G29030,AT5G56320,AT2G40610,AT5G05290  
Orysa4|Os01g60770.1,Orysa4|Os05g39990.1,Orysa4|Os03g21820.1,Orysa4|Os01g16770.1,Orysa4|Os02  
g51040.1  
Orysa4|Os05g19570.1,Orysa4|Os05g19600.1,Orysa4|Os01g14650.1  
AT4G01630  
AT1G71790 Orysa4|Os03g26450.1  
Orysa4|Os01g47540.1,Orysa4|Os05g49120.1  
AT5G45700 Orysa4|Os05g11570.1  
AT4G18140,AT5G46410  
AT1G29770,AT1G29780  
AT5G11860,Orysa4|Os07g10690.1,Orysa4|Os03g63300.1  
Orysa4|Os01g43870.1  
AT2G45200 Orysa4|Os02g03450.1  
AT4G02800 Orysa4|Os04g15800.1  
AT5G01970,AT1G30050,AT2G30530 Orysa4|Os12g02570.1,Orysa4|Os11g02640.1,Orysa4|Os05g25070.1  
Orysa4|Os05g40310.1  
AT3G51770 Orysa4|Os03g18360.1  
AT5G58550  
Orysa4|Os07g08120.1  
AT4G02680 Orysa4|Os11g37520.1  
AT2G30690,AT1G08800  
Orysa4|Os03g50100.1  
Orysa4|Os08g34350.1  
AT4G13630,AT4G13160,AT1G04890  
Orysa4|Os02g31090.1,Orysa4|Os04g38920.1  
Orysa4|Os12g29740.1  
Orysa4|Os01g56790.1,Orysa4|Os03g58490.1  
Orysa4|Os08g16790.1  
Orysa4|Os04g24610.1  
AT5G16720  
Orysa4|Os03g06890.1  
AT1G70750 Orysa4|Os03g15410.1  
AT1G18265  
AT3G25940 Orysa4|Os03g50380.1  
AT5G48335,AT3G07580 Orysa4|Os02g38750.1,Orysa4|Os02g39630.1  
Orysa4|Os08g01920.1  
Orysa4|Os07g22390.1  
AT1G31480  
AT1G24350,AT1G67600 Orysa4|Os08g03370.1  
Orysa4|Os04g40980.1  
Orysa4|Os05g47530.1  
Orysa4|Os06g33930.1  
AT3G12685  
AT3G21610  
AT3G61770 Orysa4|Os05g45770.1  
AT2G25610,AT4G32530 Orysa4|Os01g42430.1  
AT3G52210 Orysa4|Os02g54000.1  
AT3G55760  
AT1G42430 Orysa4|Os03g04100.1  
Orysa4|Os11g37560.1  
Orysa4|Os02g45410.1  
AT2G04360  
Orysa4|Os08g25700.1  
AT3G28430 Orysa4|Os04g23210.1  
AT5G58530 Orysa4|Os05g39450.1,Orysa4|Os01g61350.1,Orysa4|Os05g28530.1  
AT5G03870  
AT5G13810,AT2G41330,AT3G57070 Orysa4|Os03g24030.1,Orysa4|Os07g46570.1  
AT1G32760,AT4G10630 Orysa4|Os04g33680.1,Orysa4|Os02g01200.1  
Orysa4|Os06g12190.1,Orysa4|Os02g51370.1,Orysa4|Os08g07450.1,Orysa4|Os04g54860.1,Orysa4|Os03  
g07470.1  
AT5G01420,AT3G11773,AT5G06470 Orysa4|Os07g06600.1,Orysa4|Os03g44650.1  
AT1G64500 Orysa4|Os01g13480.1  
Orysa4|Os10g20310.1  
AT3G28850,AT5G39865  
AT5G39800,AT5G40080 Orysa4|Os02g40490.1  
AT5G47570 Orysa4|Os10g40410.1  
AT2G30390 Orysa4|Os05g29760.1  
AT5G26030  
Orysa4|Os09g12560.1  
AT5G67290  
Orysa4|Os01g41160.1,Orysa4|Os07g06080.1  
AT2G35520,AT1G32210  
Orysa4|Os04g32550.1



AT1G05630,AT2G31830,AT2G43900  
Orysa4|Os02g27620.1  
AT1G65580 Orysa4|Os08g41270.1,Orysa4|Os09g32440.1  
AT3G47630 Orysa4|Os11g34760.1,Orysa4|Os11g34840.1  
AT5G63400,AT5G50370  
Orysa4|Os12g13380.1,Orysa4|Os11g20790.1  
AT2G17340,AT2G17320,AT4G35360 Orysa4|Os06g21980.1  
AT1G08710 Orysa4|Os01g59910.1  
AT2G33800  
Orysa4|Os03g34040.1  
AT4G38440 Orysa4|Os06g37640.1  
AT1G72150,AT1G22530  
AT3G51670,AT2G15670  
AT1G30690 Orysa4|Os06g45990.1  
AT4G09160,AT1G72160 Orysa4|Os01g65380.1,Orysa4|Os05g35460.1  
AT5G51430 Orysa4|Os06g45830.1  
Orysa4|Os05g22830.1  
Orysa4|Os04g16820.1,Orysa4|Os02g24620.1,Orysa4|Os05g22860.1  
Orysa4|Os10g21220.1,Orysa4|Os04g16830.1,Orysa4|Os02g24610.1  
AT5G13570 Orysa4|Os02g56210.1  
AT1G49350 Orysa4|Os05g09370.1  
AT1G02475,AT4G01883,AT1G02470 Orysa4|Os01g22510.1  
AT4G33640  
Orysa4|Os03g48390.1  
AT4G30740,AT4G30710,AT2G24070 Orysa4|Os09g25500.1,Orysa4|Os08g34320.1  
AT2G20815 Orysa4|Os03g38480.1  
Orysa4|Os02g55110.1  
AT4G25190 Orysa4|Os10g40620.1  
AT3G60000,AT2G44190 Orysa4|Os09g11440.1  
AT5G43160  
Orysa4|Os07g02470.1,Orysa4|Os03g55470.1  
AT1G49890,AT3G19570 Orysa4|Os10g20510.1,Orysa4|Os03g10820.1  
Orysa4|Os09g04160.1  
AT1G54300,AT3G05770  
AT4G30780,AT2G24100 Orysa4|Os02g55070.1,Orysa4|Os06g08740.1  
AT1G73680  
AT3G01420 Orysa4|Os12g26290.1  
AT3G59600,AT1G54250 Orysa4|Os06g48230.1  
AT1G07310 Orysa4|Os01g63470.1  
Orysa4|Os08g44850.1,Orysa4|Os09g39770.1  
AT5G23950  
Orysa4|Os06g05910.1,Orysa4|Os06g05900.1  
AT2G30920  
AT1G05410 Orysa4|Os03g53590.1  
AT5G18540 Orysa4|Os07g47340.1  
AT5G48390 Orysa4|Os01g66690.1  
AT2G41160,AT3G56740 Orysa4|Os01g16330.1,Orysa4|Os01g59160.1  
AT5G07360  
Orysa4|Os11g33090.1  
AT3G48425  
Orysa4|Os12g18200.1  
AT1G15880 Orysa4|Os08g34140.1,Orysa4|Os09g24980.1  
AT4G16170 Orysa4|Os03g19690.1  
AT4G16180  
AT5G46640,AT4G17950 Orysa4|Os04g49990.1  
AT1G63480,AT1G63470  
AT5G62260  
AT4G12080,AT4G22770,AT4G00200 Orysa4|Os02g03270.1,Orysa4|Os08g02490.1  
AT2G33620 Orysa4|Os09g31470.1,Orysa4|Os08g40150.1  
Orysa4|Os06g22030.1  
AT5G28590,AT3G04590 Orysa4|Os04g58730.1  
Orysa4|Os03g01540.1  
AT2G36560  
AT2G45850,AT3G61310 Orysa4|Os02g57820.1  
AT5G51590,AT4G25320  
Orysa4|Os12g05200.1,Orysa4|Os11g05160.1  
AT5G04200 Orysa4|Os11g04010.1  
AT1G79320,AT1G79330,AT1G79340,AT1G79310,AT1G16420  
Orysa4|Os01g58580.1,Orysa4|Os05g41670.1,Orysa4|Os05g41660.1  
AT2G41940 Orysa4|Os08g36110.1  
AT1G10522 Orysa4|Os09g21460.1  
AT2G02390,AT2G02380 Orysa4|Os12g10730.1,Orysa4|Os12g10720.1,Orysa4|Os11g14040.1  
AT4G02390  
AT2G31320 Orysa4|Os07g23110.1  
Orysa4|Os01g24920.1  
AT5G22470 Orysa4|Os02g32860.1  
AT5G23080 Orysa4|Os06g29400.1  
AT5G64930 Orysa4|Os02g53070.1,Orysa4|Os01g68970.1  
AT2G31190 Orysa4|Os04g43690.1  
AT2G45510,AT2G44890 Orysa4|Os04g48460.1  
AT5G08250,AT5G23190 Orysa4|Os10g34480.1  
Orysa4|Os02g22000.1,Orysa4|Os12g05480.1

AT1G34540,AT3G56630  
Orysa4|Os01g59020.1,Orysa4|Os01g58990.1,Orysa4|Os01g58950.1,Orysa4|Os01g58960.1,Orysa4|Os01g58970.1,Orysa4|Os01g59000.1,Orysa4|Os01g59050.1,Orysa4|Os11g04290.1,Orysa4|Os12g04100.1,Orysa4|Os11g04310.1,Orysa4|Os12g04110.1,Orysa4|Os03g12260.1  
Orysa4|Os10g36320.1  
AT3G01900,AT5G63450,AT3G48520 Orysa4|Os12g25660.1,Orysa4|Os11g29290.1  
AT1G69500 Orysa4|Os03g07250.1  
Orysa4|Os08g16310.1  
AT5G58860 Orysa4|Os01g63540.1  
AT1G24540,AT1G13140,AT1G13150,AT3G26125 Orysa4|Os02g38290.1  
AT1G66030 Orysa4|Os04g05060.1  
Orysa4|Os10g38090.1,Orysa4|Os10g38110.1,Orysa4|Os10g38120.1  
AT5G02900,AT4G39510,AT4G32170,AT4G39500,AT1G47620,AT2G23180,AT4G39480,AT4G39490,AT2G21910,AT5G52320,AT1G65340,AT1G57750  
Orysa4|Os03g04630.1,Orysa4|Os03g04640.1,Orysa4|Os03g04650.1,Orysa4|Os03g04660.1,Orysa4|Os08g16320.1,Orysa4|Os08g16260.1,Orysa4|Os08g16430.1,Orysa4|Os03g04530.1,Orysa4|Os05g08850.1,Orysa4|Os01g08800.1  
Orysa4|Os10g03290.1  
AT1G63710,AT1G01600,AT4G00360,AT2G45970 Orysa4|Os02g44654.1,Orysa4|Os04g47250.1  
Orysa4|Os05g31740.1,Orysa4|Os01g72260.1,Orysa4|Os01g72270.1  
AT5G51900  
Orysa4|Os06g03930.1  
AT2G27690 Orysa4|Os11g05380.1,Orysa4|Os12g05440.1,Orysa4|Os05g37250.1,Orysa4|Os01g63930.1  
Orysa4|Os02g09920.1  
Orysa4|Os02g09910.1  
AT3G01460  
AT5G21160Orysa4|Os01g16110.1  
AT1G53200 Orysa4|Os06g13570.1  
Orysa4|Os08g01590.1  
AT5G44860,AT4G19950,AT1G31130 Orysa4|Os01g58620.1  
Orysa4|Os01g49350.1  
AT4G29440,AT2G19710  
AT2G14830,AT1G51900,AT3G15490  
Orysa4|Os08g07830.1  
AT4G35730 Orysa4|Os09g37510.1  
AT1G25420  
AT1G13340 Orysa4|Os03g15210.1,Orysa4|Os03g15220.1,Orysa4|Os03g15230.1,Orysa4|Os03g50210.1  
Orysa4|Os01g51010.1  
AT1G34220  
AT1G55900 Orysa4|Os01g55700.1,Orysa4|Os05g43770.1  
AT1G63720,AT5G52430,AT4G25620 Orysa4|Os02g57610.1  
AT1G14410,AT2G02740 Orysa4|Os06g05350.1  
AT1G71260 Orysa4|Os02g06370.1  
AT3G09210 Orysa4|Os03g61030.1  
AT3G47980,AT5G62720 Orysa4|Os03g48030.1  
AT5G47730,AT1G55840 Orysa4|Os06g40510.1,Orysa4|Os02g10650.1,Orysa4|Os09g08390.1  
AT1G12050 Orysa4|Os02g10310.1  
AT4G31360,AT2G24440  
Orysa4|Os05g16170.1,Orysa4|Os11g47770.1  
AT1G73980,AT1G26190 Orysa4|Os02g47860.1  
AT1G66940 Orysa4|Os01g49560.1  
AT2G43190 Orysa4|Os05g39530.1  
AT4G11160  
Orysa4|Os05g49970.1  
AT1G17220  
Orysa4|Os09g34010.1  
AT4G39910,AT2G22310 Orysa4|Os03g09080.1  
Orysa4|Os02g36400.1,Orysa4|Os04g37950.1  
AT1G70350  
Orysa4|Os02g44100.1  
AT5G47455,AT4G17310  
AT5G11630Orysa4|Os02g13630.1  
Orysa4|Os04g26640.1  
Orysa4|Os04g18680.1,Orysa4|Os05g24070.1,Orysa4|Os11g23800.1,Orysa4|Os12g26490.1,Orysa4|Os02g21620.1,Orysa4|Os10g13930.1,Orysa4|Os12g24740.1,Orysa4|Os03g40360.1,Orysa4|Os02g24890.1,Orysa4|Os02g19760.1,Orysa4|Os08g16900.1,Orysa4|Os06g16750.1,Orysa4|Os10g21990.1,Orysa4|Os02g26280.1,Orysa4|Os08g24250.1  
Orysa4|Os04g14040.1  
Orysa4|Os02g22340.1  
Orysa4|Os08g17140.1  
Orysa4|Os03g33600.1  
Orysa4|Os01g31400.1,Orysa4|Os05g20890.1  
Orysa4|Os06g23990.1,Orysa4|Os06g27690.1,Orysa4|Os11g22140.1  
Orysa4|Os04g20740.1  
Orysa4|Os03g33000.1,Orysa4|Os08g21434.1,Orysa4|Os04g07960.1,Orysa4|Os11g32190.1,Orysa4|Os06g25050.1,Orysa4|Os10g18930.1,Orysa4|Os01g31380.1,Orysa4|Os11g22880.1,Orysa4|Os08g19280.1,Orysa4|Os02g23824.1,Orysa4|Os12g19960.1,Orysa4|Os03g33310.1,Orysa4|Os02g24910.1,Orysa4|Os10g16580.1,Orysa4|Os10g08240.1,Orysa4|Os01g23320.1,Orysa4|Os07g22480.1,Orysa4|Os08g19010.1,Orysa4|Os02g22690.1,Orysa4|Os04g16620.1,Orysa4|Os04g06320.1,Orysa4|Os05g20080.1,Orysa4|Os10g17220.1,Orysa4|Os05g12700.1,Orysa4|Os09g19480.1,Orysa4|Os08g23610.1,Orysa4|Os02g24980.1,Orysa4|Os08g20040.1,Orysa4|Os02g23827.1,Orysa4|Os03g33610.1,Orysa4|Os06g35310.1,Orysa4|Os06g35340.1,Orysa4|Os11g23110.1,Orysa4|Os08g21420.1,Orysa4|Os04g17574.1,Orysa4|Os06g28430.1,Orysa4|Os04g19210.1,Orysa4|Os09g12460.1,Orysa4|Os01g32020.1,Orysa4|Os03g41780.1,

Orysa4|Os10g18980.1,Orysa4|Os10g07160.1,Orysa4|Os04g12050.1,Orysa4|Os06g24370.1,Orysa4|Os04g06550.1,Orysa4|Os04g16640.1  
Orysa4|Os06g35010.1  
Orysa4|Os11g26430.1  
Orysa4|Os10g18960.1  
Orysa4|Os10g24410.1,Orysa4|Os12g19510.1  
Orysa4|Os01g39520.1,Orysa4|Os07g25860.1,Orysa4|Os09g11150.1,Orysa4|Os01g33580.1,Orysa4|Os04g17960.1,Orysa4|Os03g42530.1,Orysa4|Os05g16410.1,Orysa4|Os11g22150.1,Orysa4|Os01g38930.1,Orysa4|Os11g26980.1,Orysa4|Os03g41860.1,Orysa4|Os11g27360.1,Orysa4|Os01g28750.1,Orysa4|Os09g08290.1,Orysa4|Os05g28070.1,Orysa4|Os04g23990.1,Orysa4|Os10g09640.1,Orysa4|Os01g29488.1,Orysa4|Os12g17650.1,Orysa4|Os04g03430.1,Orysa4|Os07g17980.1,Orysa4|Os07g18680.1,Orysa4|Os03g33620.1  
Orysa4|Os12g25670.1,Orysa4|Os03g33012.1,Orysa4|Os02g22670.1,Orysa4|Os02g25660.1  
Orysa4|Os02g24900.1,Orysa4|Os06g19350.1,Orysa4|Os02g22360.1,Orysa4|Os09g03520.1,Orysa4|Os07g20380.1,Orysa4|Os02g23825.1,Orysa4|Os04g14060.1,Orysa4|Os02g24990.1,Orysa4|Os04g20150.1,Orysa4|Os08g20050.1,Orysa4|Os04g18970.1,Orysa4|Os06g28460.1,Orysa4|Os10g07090.1,Orysa4|Os10g11480.1,Orysa4|Os04g14070.1,Orysa4|Os05g22350.1,Orysa4|Os07g25870.1,Orysa4|Os11g22780.1,Orysa4|Os05g22680.1,Orysa4|Os02g19570.1,Orysa4|Os06g24380.1,Orysa4|Os01g33120.1,Orysa4|Os12g21520.1  
Orysa4|Os05g22700.1,Orysa4|Os12g19480.1,Orysa4|Os10g22160.1,Orysa4|Os06g25060.1,Orysa4|Os12g08660.1,Orysa4|Os07g20830.1  
Orysa4|Os06g32140.1,Orysa4|Os06g31990.1,Orysa4|Os06g32220.1,Orysa4|Os04g17970.1,Orysa4|Os02g23880.1,Orysa4|Os01g21690.1  
Orysa4|Os08g21770.1  
Orysa4|Os03g33014.1,Orysa4|Os11g26410.1,Orysa4|Os11g23120.1,Orysa4|Os06g28440.1  
AT1G32070 Orysa4|Os05g40260.1  
AT1G26220 Orysa4|Os08g01170.1  
AT3G48020,AT5G62860,AT3G01430 Orysa4|Os02g50940.1  
AT5G43630 Orysa4|Os01g56780.1  
AT2G26780 Orysa4|Os11g04220.1  
AT4G37500  
Orysa4|Os07g07050.1  
AT1G02590  
AT4G34890,AT4G34900  
Orysa4|Os03g58380.1  
AT2G27150,AT1G04580,AT5G20960,AT3G43600 Orysa4|Os03g57680.1,Orysa4|Os07g18120.1  
Orysa4|Os07g18154.1  
AT3G04390 Orysa4|Os03g57720.1  
AT3G52050 Orysa4|Os03g12610.1  
AT1G27430,AT1G24300 Orysa4|Os01g69990.1  
AT1G64355 Orysa4|Os05g49650.1  
AT3G26115,Orysa4|Os01g50060.1  
AT1G59600 Orysa4|Os07g39730.1,Orysa4|Os01g41000.1  
AT5G18970 Orysa4|Os05g33220.1  
Orysa4|Os10g32720.1  
AT1G29520,AT5G46530 Orysa4|Os01g14530.1,Orysa4|Os01g50440.1  
AT1G04560 Orysa4|Os07g24000.1,Orysa4|Os05g31670.1  
AT3G43840  
AT2G16530,AT1G72590  
Orysa4|Os04g48750.1  
Orysa4|Os03g63480.1  
AT5G12320 Orysa4|Os07g46500.1  
Orysa4|Os09g33810.1,Orysa4|Os08g42690.1  
AT2G17390,AT4G35450  
AT5G18410  
Orysa4|Os03g05020.1  
AT5G03455 Orysa4|Os10g39860.1,Orysa4|Os03g01770.1  
Orysa4|Os04g28870.1,Orysa4|Os04g28990.1,Orysa4|Os04g29030.1  
Orysa4|Os09g32570.1,Orysa4|Os09g32620.1,Orysa4|Os09g32640.1  
AT1G23740  
AT4G13010 Orysa4|Os04g30420.1  
AT3G15090  
AT1G01690 Orysa4|Os03g01590.1  
AT1G43690 Orysa4|Os04g34440.1  
AT5G14410 Orysa4|Os01g71210.1  
AT3G46210,AT2G07110 Orysa4|Os03g63720.1  
AT2G25170,AT4G31900  
AT2G44980 Orysa4|Os03g01200.1  
Orysa4|Os05g05230.1  
AT5G19310,AT3G06010  
Orysa4|Os07g46590.1  
AT2G18760 Orysa4|Os01g01312.1  
AT1G03750  
AT3G54280  
AT1G48310 Orysa4|Os07g44210.1  
Orysa4|Os05g45290.1  
Orysa4|Os02g46450.1  
Orysa4|Os05g15890.1  
AT5G63950 Orysa4|Os04g59620.1  
Orysa4|Os01g44990.1  
Orysa4|Os06g08480.1  
AT3G12810  
AT3G06400,AT5G18620 Orysa4|Os01g27040.1,Orysa4|Os01g26872.1,Orysa4|Os05g05780.1  
AT5G44800

Orysa4|Os02g57200.1  
AT3G57300 Orysa4|Os03g22900.1  
AT2G13370  
AT1G08600 Orysa4|Os10g31970.1  
Orysa4|Os02g06588.1  
AT5G07810 Orysa4|Os07g40730.1  
Orysa4|Os07g31450.1  
Orysa4|Os01g65850.1  
AT5G66750 Orysa4|Os03g51230.1,Orysa4|Os09g27060.1  
Orysa4|Os02g06592.1  
AT2G02090 Orysa4|Os04g47830.1  
AT3G19210 Orysa4|Os02g52510.1  
AT2G46020 Orysa4|Os02g02290.1  
AT1G12330 Orysa4|Os03g14500.1  
AT3G28760 Orysa4|Os03g07420.1  
AT2G21180Orysa4|Os03g14570.1  
Orysa4|Os10g09240.1  
AT1G67785 Orysa4|Os01g68030.1  
AT2G14870,AT5G12190 Orysa4|Os03g59710.1  
AT1G71950 Orysa4|Os07g25690.1,Orysa4|Os03g62210.1,Orysa4|Os01g52960.1,Orysa4|Os04g50750.1  
AT2G03600,AT2G03590,AT2G03530,AT2G03520,AT1G26440  
Orysa4|Os12g31890.1,Orysa4|Os12g31850.1,Orysa4|Os12g31860.1  
AT1G69430,AT1G26650 Orysa4|Os07g40470.1  
Orysa4|Os03g03020.1  
AT4G35490 Orysa4|Os10g32870.1  
AT5G51610,AT1G32990  
AT1G64330,AT5G41790,AT1G64320,AT5G41780  
Orysa4|Os11g07940.1  
AT5G11700,AT4G32920 Orysa4|Os05g09360.1,Orysa4|Os01g09246.1  
AT5G47020 Orysa4|Os04g10380.1  
AT1G77760,AT1G37130 Orysa4|Os02g53130.1  
Orysa4|Os08g36480.1,Orysa4|Os08g36500.1,Orysa4|Os10g17780.1  
AT5G15260,AT3G01170 Orysa4|Os03g10160.1,Orysa4|Os01g59950.1,Orysa4|Os05g40950.1  
AT5G65040  
Orysa4|Os06g50080.1  
AT1G22160,AT1G78020,AT4G39795  
Orysa4|Os09g20240.1,Orysa4|Os08g31510.1,Orysa4|Os02g51550.1,Orysa4|Os06g11980.1  
AT4G17670,AT5G47060,AT2G44670 Orysa4|Os04g49620.1  
Orysa4|Os02g46190.1,Orysa4|Os04g49660.1,Orysa4|Os04g49670.1,Orysa4|Os04g49680.1,Orysa4|Os02g46210.1,Orysa4|Os02g46180.1,Orysa4|Os04g49650.1  
AT5G49120,AT1G53885  
Orysa4|Os03g08520.1,Orysa4|Os09g26370.1,Orysa4|Os07g42390.1,Orysa4|Os11g43790.1  
AT5G22950,AT3G45000 Orysa4|Os07g29630.1  
Orysa4|Os05g18294.1  
AT1G75170,AT4G36640 Orysa4|Os03g51430.1  
AT5G63060  
Orysa4|Os01g16000.1  
AT1G14820  
Orysa4|Os05g18470.1  
AT4G08690,AT1G22180 Orysa4|Os02g51610.1  
AT1G01630 Orysa4|Os01g70210.1,Orysa4|Os03g63370.1  
AT3G07140 Orysa4|Os11g28980.1  
Orysa4|Os04g58490.1  
AT5G53470,AT4G27780 Orysa4|Os04g58550.1  
AT5G43300,AT3G02040,AT5G41080 Orysa4|Os08g42390.1  
AT1G80710 Orysa4|Os08g18150.1,Orysa4|Os08g18880.1  
Orysa4|Os12g34860.1  
AT3G58140  
Orysa4|Os12g28260.1,Orysa4|Os03g44440.1  
AT3G17690,AT3G17700 Orysa4|Os06g10580.1,Orysa4|Os02g53340.1  
Orysa4|Os02g41710.1  
AT5G53130 Orysa4|Os06g33610.1,Orysa4|Os06g33570.1,Orysa4|Os02g15580.1  
AT4G01010,AT1G01340,AT2G46450,AT2G46440,AT2G46430  
AT3G48010,AT5G14870 Orysa4|Os12g06570.1  
AT4G30560,AT2G23980,AT5G57940,AT1G15990,AT1G19780 Orysa4|Os04g55080.1  
AT2G28260  
Orysa4|Os09g38580.1  
AT5G15410 Orysa4|Os03g55100.1  
AT2G24610,AT4G30360 Orysa4|Os06g08850.1,Orysa4|Os02g54760.1  
AT5G54250 Orysa4|Os01g57370.1  
AT5G05490 Orysa4|Os05g50410.1  
AT5G42655 Orysa4|Os03g52920.1  
Orysa4|Os01g02000.1  
AT3G29060,AT1G69480,AT2G03240,AT1G14040,AT2G03250,AT2G03260,AT1G26730,AT1G35350,AT4G25350  
AT1G68740 Orysa4|Os06g29790.1  
AT3G23430 Orysa4|Os02g56510.1  
Orysa4|Os03g08870.1  
AT1G29060,AT4G14600 Orysa4|Os07g38990.1  
AT1G05575,AT2G31945 Orysa4|Os06g10530.1,Orysa4|Os02g53410.1,Orysa4|Os09g27410.1  
Orysa4|Os12g38800.1  
AT4G00830 Orysa4|Os10g06130.1,Orysa4|Os11g14430.1  
AT5G28390,AT3G52660 Orysa4|Os12g04180.1,Orysa4|Os11g04390.1

AT4G27620,AT4G27610 Orysa4|Os05g51000.1,Orysa4|Os02g37130.1  
AT4G11080,AT4G23800 Orysa4|Os02g15810.1  
AT2G34770,AT4G20870 Orysa4|Os03g56820.1  
AT3G08920  
AT4G24750 Orysa4|Os02g38240.1  
AT3G28857,AT5G39860,AT5G15160,AT1G26945,AT1G74500,AT3G47710  
Orysa4|Os10g26410.1,Orysa4|Os03g07540.1,Orysa4|Os02g51320.1,Orysa4|Os06g12210.1,Orysa4|Os11  
g39000.1,Orysa4|Os04g54900.1,Orysa4|Os03g07510.1  
AT5G48840 Orysa4|Os03g63490.1  
AT3G11590,AT5G22310  
Orysa4|Os07g12920.1,Orysa4|Os02g30280.1,Orysa4|Os05g34800.1,Orysa4|Os04g31400.1  
AT1G15700 Orysa4|Os07g32880.1  
AT4G04640  
AT3G59840 Orysa4|Os05g42110.1  
AT5G60030  
AT1G56660 Orysa4|Os07g07040.1  
AT5G45520  
Orysa4|Os02g38470.1  
AT3G28770  
Orysa4|Os04g51960.1  
AT5G19940 Orysa4|Os04g51792.1  
AT5G57340 Orysa4|Os06g47930.1  
AT3G22480  
Orysa4|Os11g36050.1  
AT5G24090  
Orysa4|Os01g64100.1,Orysa4|Os01g64110.1  
Orysa4|Os01g19750.1  
Orysa4|Os06g24990.1,Orysa4|Os07g43820.1,Orysa4|Os11g47590.1,Orysa4|Os11g47610.1,Orysa4|Os11  
g47600.1,Orysa4|Os06g25010.1,Orysa4|Os08g40740.1,Orysa4|Os11g47580.1,Orysa4|Os11g47500.1,Orysa4|Os11g4  
7510.1,Orysa4|Os08g40690.1,Orysa4|Os05g15770.1,Orysa4|Os05g15850.1,Orysa4|Os05g15880.1,Orysa4|Os05g15  
920.1,Orysa4|Os11g47530.1,Orysa4|Os08g40680.1,Orysa4|Os11g47520.1,Orysa4|Os11g47570.1,Orysa4|Os11g4756  
0.1,Orysa4|Os11g47550.1,Orysa4|Os01g28590.1,Orysa4|Os12g18750.1,Orysa4|Os07g23850.1,Orysa4|Os04g27980.  
1,Orysa4|Os01g49320.1,Orysa4|Os01g47070.1  
Orysa4|Os07g19040.1  
AT1G68310,AT3G09380  
Orysa4|Os03g56410.1  
AT2G39220,AT3G54950,AT4G29800 Orysa4|Os03g14950.1  
AT3G63200  
Orysa4|Os06g25240.1,Orysa4|Os12g41720.1,Orysa4|Os03g43880.1,Orysa4|Os06g46350.1,Orysa4|Os03  
g57080.1  
AT5G12340 Orysa4|Os05g31970.1,Orysa4|Os01g72360.1  
AT1G28190 Orysa4|Os11g33050.1  
AT2G02160 Orysa4|Os02g58440.1,Orysa4|Os04g57600.1,Orysa4|Os05g08400.1  
AT1G77800 Orysa4|Os06g10690.1,Orysa4|Os02g52960.1  
Orysa4|Os06g23440.1,Orysa4|Os02g19770.1  
AT2G04520,AT5G35680  
AT5G62210,AT5G07190,AT5G62200,AT2G41470,AT2G41440 Orysa4|Os01g07780.1,Orysa4|Os05g07890.1  
AT3G11540,Orysa4|Os08g44510.1  
AT4G28020 Orysa4|Os09g25950.1  
Orysa4|Os02g38800.1  
AT4G24820 Orysa4|Os01g74360.1,Orysa4|Os02g38810.1,Orysa4|Os04g40850.1  
Orysa4|Os01g27760.1  
AT3G06350 Orysa4|Os01g27770.1,Orysa4|Os01g27750.1  
Orysa4|Os03g30150.1,Orysa4|Os09g31140.1  
Orysa4|Os06g40960.1  
AT1G51220,AT3G20880 Orysa4|Os08g39390.1,Orysa4|Os09g31150.1  
AT3G57670  
AT1G34790 Orysa4|Os09g10980.1  
AT1G13290 Orysa4|Os09g13680.1  
AT1G08290 Orysa4|Os05g37190.1,Orysa4|Os01g63980.1  
Orysa4|Os07g44730.1  
AT2G26810  
AT3G25660 Orysa4|Os04g55050.1  
Orysa4|Os02g54720.1  
AT5G57710,AT4G30350 Orysa4|Os08g15230.1  
AT5G55960 Orysa4|Os06g19390.1  
AT2G27490 Orysa4|Os01g25880.1  
AT3G03890 Orysa4|Os07g38620.1  
AT3G10940 Orysa4|Os12g02120.1,Orysa4|Os11g02180.1  
AT3G52180 Orysa4|Os03g01750.1  
AT2G45990 Orysa4|Os07g23520.1  
AT4G25000  
Orysa4|Os02g52710.1,Orysa4|Os02g52700.1,Orysa4|Os01g25510.1,Orysa4|Os06g49970.1,Orysa4|Os09  
g28430.1,Orysa4|Os09g28420.1,Orysa4|Os08g36900.1,Orysa4|Os09g28400.1,Orysa4|Os08g36910.1  
AT1G69830 Orysa4|Os01g51754.1  
AT1G76130 Orysa4|Os04g33040.1  
AT1G10010,AT1G58360,AT5G49630  
Orysa4|Os12g10240.1  
Orysa4|Os08g32070.1  
AT5G23810 Orysa4|Os02g49060.1,Orysa4|Os04g56470.1,Orysa4|Os04g39489.1  
Orysa4|Os12g08130.1,Orysa4|Os12g08090.1,Orysa4|Os12g09320.1  
Orysa4|Os09g25880.1,Orysa4|Os03g05080.1

Orysa4|Os06g12350.1,Orysa4|Os12g09300.1,Orysa4|Os01g65660.1,Orysa4|Os01g65670.1  
AT5G63850,AT5G09220,AT1G77380,AT1G44100 Orysa4|Os02g01210.1  
Orysa4|Os02g46810.1  
Orysa4|Os04g41350.1  
Orysa4|Os06g36210.1,Orysa4|Os06g36180.1,Orysa4|Os06g12330.1  
Orysa4|Os07g04180.1  
Orysa4|Os05g34980.1,Orysa4|Os01g66010.1  
AT4G19003 Orysa4|Os01g46932.1  
AT3G58750,AT3G58740,AT2G42790 Orysa4|Os02g13840.1  
AT5G38880 Orysa4|Os04g35620.1  
AT5G63890 Orysa4|Os01g13190.1  
AT2G30890 Orysa4|Os05g49040.1  
AT3G02980,AT5G16800 Orysa4|Os02g46700.1  
AT3G23180,AT3G23190,AT3G23175  
AT4G14420 Orysa4|Os10g30860.1,Orysa4|Os03g05520.1,Orysa4|Os04g10240.1  
AT1G04340,AT5G43460  
AT3G05520 Orysa4|Os07g23200.1  
AT2G18710 Orysa4|Os08g15460.1  
AT4G31200 Orysa4|Os06g46880.1  
AT3G06880 Orysa4|Os05g30010.1  
AT2G25460 Orysa4|Os01g09770.1  
AT2G10560,AT5G04860  
AT3G11760,Orysa4|Os12g42570.1,Orysa4|Os03g44670.1  
AT3G15560  
Orysa4|Os02g46110.1  
Orysa4|Os05g33770.1  
AT3G15550 Orysa4|Os01g08150.1  
AT2G25430,AT4G32285 Orysa4|Os03g16800.1  
Orysa4|Os05g02140.1  
AT1G03050,AT4G02650  
Orysa4|Os01g65860.1  
Orysa4|Os09g29680.1,Orysa4|Os05g35160.1  
AT1G05020 Orysa4|Os06g37780.1  
AT3G56900 Orysa4|Os12g03540.1  
AT5G45360 Orysa4|Os06g49530.1  
AT3G20720 Orysa4|Os04g53670.1  
AT1G13880,AT2G03470,AT1G26580 Orysa4|Os03g31230.1  
AT2G18850 Orysa4|Os08g14660.1  
AT2G37240 Orysa4|Os01g70450.1,Orysa4|Os02g35960.1,Orysa4|Os03g17600.1  
AT5G64710,AT5G09840,AT5G35640 Orysa4|Os11g06680.1,Orysa4|Os12g06560.1  
AT5G10690 Orysa4|Os09g26190.1  
AT1G79010,AT1G16700  
Orysa4|Os03g56300.1  
AT1G53260,AT3G15000 Orysa4|Os09g33480.1  
AT1G19800 Orysa4|Os04g46700.1  
AT2G43210 Orysa4|Os11g18880.1  
AT4G01245,AT4G01270 Orysa4|Os12g18550.1,Orysa4|Os08g05560.1  
AT5G19300 Orysa4|Os04g17064.1  
AT5G17070 Orysa4|Os06g19650.1  
AT5G47830 Orysa4|Os02g06390.1  
AT3G06510  
Orysa4|Os11g45710.1  
AT3G51090 Orysa4|Os06g49890.1  
AT2G16460  
Orysa4|Os08g36450.1  
AT3G04930,AT5G28040 Orysa4|Os01g14750.1  
Orysa4|Os03g50110.1  
Orysa4|Os03g25430.1,Orysa4|Os07g44200.1,Orysa4|Os01g14720.1  
AT1G28570,AT1G28580,AT1G28610,AT2G27360,AT1G28590,AT1G28600,AT1G31550,AT1G28660,AT1G28670,AT1G28640,AT1G28650  
Orysa4|Os03g25010.1,Orysa4|Os03g25030.1,Orysa4|Os01g46120.1,Orysa4|Os01g42730.1,Orysa4|Os01g46210.1,Orysa4|Os01g46220.1  
AT1G54790,AT3G05180  
AT1G09390,AT1G56670,AT3G62280  
Orysa4|Os01g22640.1,Orysa4|Os01g22660.1,Orysa4|Os05g06710.1,Orysa4|Os01g22780.1  
AT3G26430,AT1G67830 Orysa4|Os07g39740.1,Orysa4|Os07g39750.1  
AT5G14450,AT3G27950  
Orysa4|Os01g11620.1,Orysa4|Os06g06290.1,Orysa4|Os06g03900.1,Orysa4|Os06g06260.1,Orysa4|Os02g15230.1,Orysa4|Os06g34070.1,Orysa4|Os01g11650.1,Orysa4|Os06g34120.1  
AT5G03980  
Orysa4|Os02g39150.1,Orysa4|Os02g39590.1,Orysa4|Os02g39170.1,Orysa4|Os06g47910.1,Orysa4|Os11g31940.1  
Orysa4|Os01g46260.1  
AT5G45910 Orysa4|Os01g11710.1  
Orysa4|Os05g04240.1  
Orysa4|Os10g25380.1,Orysa4|Os10g25340.1,Orysa4|Os10g25400.1,Orysa4|Os10g25420.1  
Orysa4|Os01g11660.1,Orysa4|Os01g12320.1,Orysa4|Os01g11700.1,Orysa4|Os01g11760.1,Orysa4|Os01g11790.1,Orysa4|Os01g11750.1,Orysa4|Os01g11730.1,Orysa4|Os05g11970.1,Orysa4|Os05g11950.1,Orysa4|Os05g43120.1,Orysa4|Os05g43100.1,Orysa4|Os05g43110.1,Orysa4|Os05g43090.1  
Orysa4|Os03g25000.1  
Orysa4|Os06g03890.1,Orysa4|Os05g06720.1  
AT3G48460 Orysa4|Os03g62740.1

AT4G01130Orysa4|Os06g06520.1  
AT4G16450 Orysa4|Os08g33460.1  
AT5G57655  
Orysa4|Os07g47290.1  
AT1G75730 Orysa4|Os02g02910.1  
AT1G49670 Orysa4|Os09g28570.1  
AT5G16840 Orysa4|Os04g53330.1,Orysa4|Os04g50790.1,Orysa4|Os06g02240.1  
AT1G67950 Orysa4|Os03g50560.1  
AT1G14340 Orysa4|Os04g54870.1  
AT5G46870,AT4G17720  
AT5G32450 Orysa4|Os03g53770.1  
AT3G01210  
AT3G29130 Orysa4|Os03g43910.1  
AT5G47050,AT4G17680,AT1G32740 Orysa4|Os02g46220.1  
AT1G45976 Orysa4|Os03g15730.1  
AT4G35070  
Orysa4|Os04g32980.1,Orysa4|Os04g33030.1,Orysa4|Os02g32420.1,Orysa4|Os11g34020.1,Orysa4|Os09  
g28950.1,Orysa4|Os11g17940.1,Orysa4|Os11g34080.1,Orysa4|Os03g46570.1  
AT1G10650,AT1G60610 Orysa4|Os02g03760.1  
AT4G18460 Orysa4|Os01g14040.1  
AT2G04530 Orysa4|Os09g30466.1  
AT1G74700  
Orysa4|Os02g12290.1  
AT1G52510 Orysa4|Os04g55180.1  
AT1G78030,AT2G22660,AT4G37900 Orysa4|Os11g40590.1  
AT2G20180,AT4G28810,AT4G28800,AT4G28790 Orysa4|Os12g40630.1  
Orysa4|Os07g06940.1  
AT1G27160,AT1G14610 Orysa4|Os03g02100.1,Orysa4|Os03g48850.1,Orysa4|Os03g21740.1  
AT5G16715  
AT1G63060,AT5G07330 Orysa4|Os11g32890.1  
AT2G31010,AT2G42640,AT3G58640 Orysa4|Os02g14530.1,Orysa4|Os01g48330.1  
AT1G53000 Orysa4|Os05g48750.1  
AT1G01710,AT4G00520 Orysa4|Os04g47120.1  
AT4G00510  
AT1G09812 Orysa4|Os05g35230.1,Orysa4|Os01g65630.1  
AT5G64240  
Orysa4|Os03g27210.1,Orysa4|Os03g27170.1,Orysa4|Os03g27190.1  
AT1G02170,AT4G25110  
Orysa4|Os10g41534.1  
AT1G77660,AT1G21920 Orysa4|Os09g28060.1  
AT4G17080,AT2G35170  
AT5G59050,AT2G39870,AT3G55690,AT3G54000 Orysa4|Os05g37930.1,Orysa4|Os01g63050.1  
AT5G04490 Orysa4|Os04g57500.1  
AT5G58560 Orysa4|Os12g01480.1,Orysa4|Os11g01450.1,Orysa4|Os01g61560.1  
AT5G58690,AT2G40116 Orysa4|Os12g37560.1  
AT5G58670,AT4G38530,AT3G55940,AT3G08510 Orysa4|Os05g03610.1  
AT3G47220,AT3G47290,AT5G58700  
Orysa4|Os03g18000.1  
Orysa4|Os07g49330.1,Orysa4|Os03g18010.1  
Orysa4|Os05g01940.1,Orysa4|Os03g16480.1  
Orysa4|Os02g49550.1  
Orysa4|Os03g26370.1,Orysa4|Os03g26300.1,Orysa4|Os03g26420.1  
Orysa4|Os02g09820.1  
Orysa4|Os12g04590.1,Orysa4|Os12g04660.1  
AT4G18110,AT5G54990,AT1G74620 Orysa4|Os01g44240.1  
AT2G39720  
AT2G44330,AT3G60080  
AT5G20910 Orysa4|Os09g26400.1  
AT1G49850  
AT1G60360 Orysa4|Os02g52870.1,Orysa4|Os06g10800.1  
AT3G56580,AT2G40830 Orysa4|Os03g22830.1  
Orysa4|Os01g16950.1,Orysa4|Os03g20870.1  
Orysa4|Os06g42700.1  
AT1G68180  
AT1G26800,AT1G14200  
AT1G50350  
Orysa4|Os11g04690.1,Orysa4|Os12g04460.1,Orysa4|Os12g04650.1  
Orysa4|Os06g05200.1  
Orysa4|Os11g05200.1  
AT5G56340,AT4G26400,AT3G13430,AT1G55530 Orysa4|Os05g40980.1,Orysa4|Os03g59760.1  
Orysa4|Os01g74040.1  
AT1G18760,AT1G18770,AT3G13228,AT1G18780,AT2G29840,AT1G21960,AT5G53910  
Orysa4|Os04g43220.1  
Orysa4|Os12g05280.1  
Orysa4|Os08g38060.1  
AT5G59550,AT3G46620  
AT5G64920 Orysa4|Os09g27380.1,Orysa4|Os08g36170.1  
Orysa4|Os01g58780.1,Orysa4|Os05g41520.1  
AT2G03000 Orysa4|Os07g43740.1  
AT3G19950 Orysa4|Os06g01200.1,Orysa4|Os10g34590.1  
Orysa4|Os11g37230.1  
AT5G60820,AT5G08139

AT5G01980 Orysa4|Os11g02670.1  
AT2G15580 Orysa4|Os06g08250.1,Orysa4|Os02g55480.1  
AT3G58720  
AT3G10815 Orysa4|Os12g04450.1,Orysa4|Os11g04680.1  
AT5G15820,AT3G02340,AT3G30460 Orysa4|Os09g06740.1  
AT5G24490 Orysa4|Os03g63950.1  
AT3G10572 Orysa4|Os06g48970.1  
AT1G04940 Orysa4|Os01g73150.1  
AT4G02090 Orysa4|Os03g19260.1  
AT3G03280,AT5G17350 Orysa4|Os05g47960.1,Orysa4|Os01g49210.1  
AT5G52190 Orysa4|Os04g48020.1  
AT3G56830  
AT1G65420 Orysa4|Os09g11520.1  
Orysa4|Os10g34400.1  
AT1G27510 Orysa4|Os01g01790.1  
AT4G33630 Orysa4|Os08g12830.1,Orysa4|Os10g24810.1  
AT2G38670 Orysa4|Os11g03050.1,Orysa4|Os12g02820.1  
AT5G11960 Orysa4|Os01g51190.1  
AT5G25150 Orysa4|Os07g10520.1,Orysa4|Os06g44030.1  
Orysa4|Os04g32880.1  
AT1G09020 Orysa4|Os03g63940.1  
AT5G58005 Orysa4|Os08g34270.1  
AT2G30660,AT5G65940,AT2G30650 Orysa4|Os10g42220.1  
AT3G24360,AT4G13360 Orysa4|Os06g39344.1  
AT4G31810  
AT3G60510 Orysa4|Os10g40540.1  
Orysa4|Os10g42210.1,Orysa4|Os12g16350.1  
AT1G06550 Orysa4|Os01g54860.1  
AT2G47020 Orysa4|Os05g19630.1  
AT3G62910  
AT3G53440 Orysa4|Os01g40000.1  
AT1G78810 Orysa4|Os06g06014.1  
Orysa4|Os01g55420.1  
AT3G58020  
AT2G18465 Orysa4|Os04g59060.1,Orysa4|Os05g01590.1  
AT2G44100,AT3G59920  
Orysa4|Os05g34540.1,Orysa4|Os05g23860.1  
Orysa4|Os07g16970.1  
AT5G09550  
AT1G42990 Orysa4|Os06g41770.1  
AT4G26450 Orysa4|Os04g39540.1  
AT5G56210,AT3G13360 Orysa4|Os09g30350.1  
AT1G02065  
Orysa4|Os11g30370.1  
Orysa4|Os01g69830.1  
Orysa4|Os02g04680.1  
AT2G33810  
Orysa4|Os04g46580.1  
AT3G57920,AT2G42200 Orysa4|Os09g31438.1,Orysa4|Os08g39890.1  
Orysa4|Os07g32170.1,Orysa4|Os06g44860.1,Orysa4|Os04g56170.1  
AT1G27370,AT1G27360,AT5G43270  
AT1G69170  
AT5G50570,AT5G50670 Orysa4|Os09g32944.1  
Orysa4|Os02g07780.1,Orysa4|Os06g45310.1  
AT3G09970,AT3G09960 Orysa4|Os04g33470.1  
AT5G14780 Orysa4|Os06g29220.1,Orysa4|Os06g29180.1  
AT1G42960  
AT5G16660,AT3G02900 Orysa4|Os12g39370.1  
AT1G30970 Orysa4|Os09g38790.1  
Orysa4|Os08g36610.1,Orysa4|Os03g60180.1  
AT5G58370  
AT1G51390,AT3G20970 Orysa4|Os05g06330.1  
Orysa4|Os08g07400.1,Orysa4|Os04g55030.1  
Orysa4|Os04g55000.1  
AT1G69670,AT1G26830 Orysa4|Os02g51180.1  
Orysa4|Os01g70920.1  
AT4G02570  
AT1G59800,AT1G59790  
Orysa4|Os01g39840.1  
Orysa4|Os05g05700.1,Orysa4|Os01g27150.1  
Orysa4|Os01g50980.1  
AT1G02980  
Orysa4|Os01g27160.1  
AT3G46910,AT4G12100  
AT5G46210 Orysa4|Os03g57290.1  
Orysa4|Os05g10580.1,Orysa4|Os12g13360.1  
AT2G03510 Orysa4|Os03g30790.1  
Orysa4|Os01g42050.1  
AT5G27280 Orysa4|Os06g50870.1  
AT1G68730



AT2G22690,AT4G37880  
AT5G09630 Orysa4|Os06g38940.1  
AT1G48430,AT3G17770 Orysa4|Os03g51000.1  
AT4G31040 Orysa4|Os08g12780.1  
AT1G48405,AT3G17680 Orysa4|Os03g01980.1  
AT5G14230 Orysa4|Os04g41290.1  
Orysa4|Os04g41280.1  
Orysa4|Os02g25960.1  
AT2G30942 Orysa4|Os07g26550.1,Orysa4|Os07g26520.1  
AT3G16400,AT3G16410,AT3G16390,AT2G33070,AT1G54040,AT5G48180  
AT3G07720 Orysa4|Os09g07460.1  
AT5G43680 Orysa4|Os11g34980.1,Orysa4|Os11g34950.1  
AT3G06310,AT5G18800 Orysa4|Os03g18420.1  
AT1G79380 Orysa4|Os08g04130.1  
AT5G63970 Orysa4|Os01g73000.1  
Orysa4|Os09g39190.1  
Orysa4|Os08g38600.1,Orysa4|Os06g40650.1  
AT5G14420,AT3G01650,AT1G67800  
Orysa4|Os01g68060.1  
Orysa4|Os12g19030.1  
AT1G47750 Orysa4|Os03g19000.1,Orysa4|Os03g19010.1  
AT4G16210 Orysa4|Os03g19680.1  
AT3G52910 Orysa4|Os01g55900.1  
AT2G38780 Orysa4|Os05g31680.1  
AT1G71410,AT1G22870 Orysa4|Os01g42950.1  
AT2G03620  
AT5G09690 Orysa4|Os01g64890.1,Orysa4|Os01g68040.1  
AT1G16010,AT1G80900 Orysa4|Os06g44150.1  
AT3G58970,AT4G28580 Orysa4|Os03g04480.1,Orysa4|Os10g39790.1  
AT5G64560 Orysa4|Os03g53110.1  
AT3G19640 Orysa4|Os04g42280.1  
AT5G09710,AT5G09720  
AT5G20720 Orysa4|Os06g09679.1,Orysa4|Os09g26730.1  
Orysa4|Os02g02720.1,Orysa4|Os08g17600.1  
AT1G16225,AT1G16230,AT1G79590,AT1G16240  
AT5G07400 Orysa4|Os04g33050.1  
AT2G48160,AT3G63070 Orysa4|Os07g46180.1,Orysa4|Os03g24339.1  
AT5G08230,AT5G23150 Orysa4|Os08g01054.1  
AT1G48440,AT3G17780 Orysa4|Os03g13750.1  
AT3G03160,AT5G17190 Orysa4|Os02g50210.1  
AT5G50350 Orysa4|Os06g40740.1  
AT3G22990 Orysa4|Os07g41900.1  
AT2G38450 Orysa4|Os05g27660.1,Orysa4|Os03g18700.1  
AT5G05360  
AT1G02910 Orysa4|Os01g25600.1  
Orysa4|Os07g37140.1  
Orysa4|Os03g31594.1,Orysa4|Os02g58210.1  
AT1G09060 Orysa4|Os03g22540.1  
AT3G07610  
AT1G11950,AT1G62310 Orysa4|Os09g22040.1,Orysa4|Os09g22540.1  
AT4G21430 Orysa4|Os02g01940.1  
AT4G00990  
AT1G73960 Orysa4|Os09g24440.1  
AT3G14440,AT1G78390,AT4G18350,AT1G30100  
Orysa4|Os03g44380.1,Orysa4|Os12g42280.1,Orysa4|Os07g05940.1  
Orysa4|Os04g04230.1  
AT3G24220  
AT3G63520 Orysa4|Os12g44310.1  
AT4G19170 Orysa4|Os02g47510.1,Orysa4|Os12g24800.1  
Orysa4|Os10g08980.1  
AT3G11960 Orysa4|Os07g10390.1  
AT4G01310 Orysa4|Os03g03360.1  
AT5G04800,AT2G05220,AT2G04390,AT3G10610 Orysa4|Os10g27190.1,Orysa4|Os03g01900.1  
AT5G65290 Orysa4|Os06g11520.1  
AT5G57370 Orysa4|Os06g32190.1,Orysa4|Os06g32230.1  
AT2G34780 Orysa4|Os01g56290.1  
Orysa4|Os11g42170.1  
AT1G05490  
AT1G55760 Orysa4|Os08g38700.1  
AT1G21780  
AT5G02280  
Orysa4|Os07g27150.1  
AT1G02430,AT1G02440  
AT3G03120,AT5G17060 Orysa4|Os02g47110.1,Orysa4|Os10g42940.1  
Orysa4|Os06g02390.1  
AT5G37680 Orysa4|Os02g49980.1  
AT2G24765 Orysa4|Os08g15040.1

AT5G67560,AT3G49870 Orysa4|Os03g10370.1  
AT2G18390 Orysa4|Os02g22140.1  
AT2G15310  
AT5G52210 Orysa4|Os03g27450.1,Orysa4|Os07g42820.1  
Orysa4|Os07g12200.1,Orysa4|Os07g12170.1  
AT3G62290,AT2G47170,AT1G70490,AT1G23490,AT1G10630,AT5G14670  
Orysa4|Os01g59790.1,Orysa4|Os05g41060.1  
Orysa4|Os01g16030.1  
AT3G49860  
Orysa4|Os03g59740.1  
AT3G22950 Orysa4|Os11g37640.1  
AT1G78610,AT3G14810,AT1G53470 Orysa4|Os02g44770.1  
AT1G49260,AT5G19520,AT5G12080  
AT2G17010,AT2G17000  
Orysa4|Os02g27130.1  
AT4G17110,AT4G17130  
AT1G48090 Orysa4|Os02g27110.1  
AT4G17120  
AT4G17140  
AT1G32520 Orysa4|Os11g11330.1  
Orysa4|Os05g38640.1  
AT1G52740  
AT5G54640,AT3G20670,AT1G51060,AT4G27230  
Orysa4|Os07g36130.1,Orysa4|Os12g25120.1,Orysa4|Os07g36140.1,Orysa4|Os08g33100.1  
Orysa4|Os07g18140.1,Orysa4|Os11g27140.1,Orysa4|Os07g37340.1,Orysa4|Os08g19240.1,Orysa4|Os04  
g13530.1  
AT5G02560  
AT4G13570  
AT5G27670,AT5G59870  
AT1G54690,AT1G08880 Orysa4|Os03g51200.1,Orysa4|Os12g34510.1  
Orysa4|Os03g17100.1,Orysa4|Os01g31800.1,Orysa4|Os05g02300.1  
AT3G54560,AT2G38810 Orysa4|Os10g28230.1,Orysa4|Os03g06670.1,Orysa4|Os03g53190.1  
AT3G54860 Orysa4|Os04g14654.1  
AT2G16960,AT2G16950 Orysa4|Os04g59494.1  
Orysa4|Os01g66980.1  
AT2G30695 Orysa4|Os09g34000.1  
Orysa4|Os04g26270.1  
Orysa4|Os01g11680.1  
Orysa4|Os07g39490.1,Orysa4|Os03g27400.1,Orysa4|Os08g27740.1,Orysa4|Os08g31300.1,Orysa4|Os07  
g35710.1,Orysa4|Os02g25460.1,Orysa4|Os12g24810.1,Orysa4|Os10g19270.1,Orysa4|Os09g01520.1,Orysa4|Os07g  
18260.1  
Orysa4|Os06g29880.1,Orysa4|Os09g27840.1  
Orysa4|Os03g45300.1  
Orysa4|Os09g11390.1,Orysa4|Os11g09870.1  
AT3G59470  
AT5G28530  
Orysa4|Os06g42520.1,Orysa4|Os03g12490.1,Orysa4|Os06g42420.1,Orysa4|Os05g39480.1,Orysa4|Os08  
g25040.1,Orysa4|Os04g04400.1,Orysa4|Os05g37540.1,Orysa4|Os04g54880.1,Orysa4|Os04g28580.1,Orysa4|Os01g  
63030.1,Orysa4|Os02g40950.1,Orysa4|Os01g19050.1,Orysa4|Os11g17430.1,Orysa4|Os07g32110.1,Orysa4|Os11g17  
300.1  
Orysa4|Os07g04860.1  
Orysa4|Os12g05940.1,Orysa4|Os10g42160.1,Orysa4|Os02g01860.1,Orysa4|Os12g28580.1,Orysa4|Os03  
g25020.1,Orysa4|Os04g46550.1,Orysa4|Os03g37920.1,Orysa4|Os02g28180.1,Orysa4|Os02g10840.1  
AT1G76320,AT4G19990,AT4G15090,AT3G22170,AT2G32250  
Orysa4|Os01g37310.1,Orysa4|Os11g26770.1,Orysa4|Os06g25610.1,Orysa4|Os07g05910.1,Orysa4|Os01  
g23840.1  
Orysa4|Os12g24870.1,Orysa4|Os01g64210.1,Orysa4|Os08g32440.1,Orysa4|Os06g32530.1,Orysa4|Os03  
g41800.1,Orysa4|Os11g02980.1,Orysa4|Os10g24020.1,Orysa4|Os12g18910.1,Orysa4|Os06g28150.1,Orysa4|Os07g  
46900.1,Orysa4|Os06g28250.1  
Orysa4|Os01g20960.1  
AT1G52520,AT1G80010 Orysa4|Os03g62660.1,Orysa4|Os02g39520.1,Orysa4|Os02g39540.1  
Orysa4|Os04g10390.1,Orysa4|Os03g16540.1,Orysa4|Os01g43000.1,Orysa4|Os06g13770.1,Orysa4|Os05  
g10760.1,Orysa4|Os09g11920.1  
Orysa4|Os02g34590.1,Orysa4|Os06g07010.1  
Orysa4|Os01g16740.1,Orysa4|Os05g03090.1,Orysa4|Os07g35720.1,Orysa4|Os03g24970.1,Orysa4|Os04  
g49380.1,Orysa4|Os03g40160.1,Orysa4|Os03g24980.1,Orysa4|Os04g30870.1  
AT2G43280,AT4G12850  
Orysa4|Os02g16240.1,Orysa4|Os02g39220.1,Orysa4|Os08g44170.1,Orysa4|Os02g26780.1,Orysa4|Os03  
g06860.1,Orysa4|Os01g33540.1,Orysa4|Os12g32140.1,Orysa4|Os05g03800.1  
Orysa4|Os06g41320.1  
Orysa4|Os03g15010.1,Orysa4|Os04g40060.1  
Orysa4|Os10g16500.1  
Orysa4|Os10g17750.1  
Orysa4|Os07g43400.1  
Orysa4|Os03g08370.1,Orysa4|Os07g42400.1,Orysa4|Os01g64940.1,Orysa4|Os01g63380.1,Orysa4|Os04  
g52560.1,Orysa4|Os03g56630.1,Orysa4|Os07g37630.1,Orysa4|Os07g31400.1  
Orysa4|Os04g34430.1  
AT4G38180,AT4G38170,AT2G27110,AT5G18960,AT3G06250  
Orysa4|Os06g39680.1,Orysa4|Os12g12380.1,Orysa4|Os03g50900.1,Orysa4|Os11g14020.1,Orysa4|Os08  
g06930.1  
AT1G10240 Orysa4|Os04g36590.1  
Orysa4|Os08g15510.1,Orysa4|Os05g39790.1,Orysa4|Os01g16660.1,Orysa4|Os11g11220.1,Orysa4|Os01

g06852.1  
AT3G07500 Orysa4|Os09g10380.1,Orysa4|Os11g41380.1,Orysa4|Os07g27770.1,Orysa4|Os07g27800.1,Orysa4|Os07g18290.1,Orysa4|Os05g25320.1,Orysa4|Os09g01780.1,Orysa4|Os06g13900.1,Orysa4|Os09g07200.1,Orysa4|Os08g40310.1,Orysa4|Os08g33270.1,Orysa4|Os03g21330.1,Orysa4|Os05g40670.1,Orysa4|Os01g61100.1,Orysa4|Os02g01950.1,Orysa4|Os01g64200.1,Orysa4|Os01g71850.1,Orysa4|Os04g44630.1,Orysa4|Os04g25690.1,Orysa4|Os07g01270.1,Orysa4|Os08g20486.1,Orysa4|Os10g34884.1,Orysa4|Os05g15930.1,Orysa4|Os02g06820.1,Orysa4|Os09g25510.1,Orysa4|Os06g36970.1,Orysa4|Os09g08460.1,Orysa4|Os05g10280.1  
Orysa4|Os08g16370.1,Orysa4|Os02g44790.1,Orysa4|Os05g30720.1,Orysa4|Os05g30310.1,Orysa4|Os09g27390.1  
Orysa4|Os07g18820.1,Orysa4|Os03g15040.1  
Orysa4|Os07g31420.1  
Orysa4|Os11g09860.1,Orysa4|Os08g14880.1,Orysa4|Os08g18850.1,Orysa4|Os09g12670.1,Orysa4|Os01g32700.1,Orysa4|Os10g06890.1  
Orysa4|Os03g27330.1,Orysa4|Os08g37340.1  
Orysa4|Os12g28300.1  
AT1G02330 Orysa4|Os03g25720.1  
Orysa4|Os02g33610.1  
AT5G63420  
AT1G49040 Orysa4|Os01g39380.1  
Orysa4|Os01g49280.1,Orysa4|Os05g47900.1  
Orysa4|Os01g66970.1  
AT2G01275  
AT3G47550,AT5G62460 Orysa4|Os08g33860.1,Orysa4|Os09g24650.1,Orysa4|Os11g38800.1,Orysa4|Os02g36740.1  
Orysa4|Os01g03100.1  
AT2G02960,AT1G14260  
AT5G38070  
AT1G02610,AT4G02075 Orysa4|Os05g28730.1,Orysa4|Os01g19800.1  
AT1G22275 Orysa4|Os04g37960.1  
AT4G01320 Orysa4|Os02g45650.1  
AT5G04885 Orysa4|Os01g56510.1  
Orysa4|Os03g53790.1  
Orysa4|Os02g03870.1,Orysa4|Os03g53800.1  
AT3G62710  
AT5G20950,AT5G20940  
AT3G47040,AT3G47000,AT3G47010,AT3G47050 Orysa4|Os05g37700.1  
AT1G23180 Orysa4|Os01g34080.1  
AT5G50110,Orysa4|Os06g13170.1  
AT5G37730,AT1G70780,AT1G23150 Orysa4|Os02g21920.1  
AT4G02790 Orysa4|Os05g35540.1  
AT1G22630 Orysa4|Os05g01530.1  
AT2G20835 Orysa4|Os07g37700.1  
AT1G52855  
AT5G21030,AT5G21150  
AT1G48410  
AT2G27040 Orysa4|Os02g40320.1  
Orysa4|Os02g45070.1,Orysa4|Os04g47870.1  
Orysa4|Os03g47830.1,Orysa4|Os02g40280.1  
AT2G32940 Orysa4|Os07g16224.1  
AT2G27880 Orysa4|Os07g09020.1  
AT1G69440 Orysa4|Os03g33650.1  
Orysa4|Os02g07310.1  
Orysa4|Os01g16860.1  
Orysa4|Os07g28850.1  
Orysa4|Os03g57540.1  
AT1G31280,AT1G31290 Orysa4|Os04g52550.1,Orysa4|Os04g52540.1  
AT5G43810 Orysa4|Os06g39640.1  
Orysa4|Os04g06770.1  
Orysa4|Os03g58600.1,Orysa4|Os03g44950.1,Orysa4|Os03g14790.1,Orysa4|Os03g23050.1  
Orysa4|Os01g01180.1  
Orysa4|Os04g31820.1,Orysa4|Os02g30470.1  
AT5G63500,AT3G48660  
AT5G40960 Orysa4|Os01g63000.1  
AT3G01950,AT5G14110  
Orysa4|Os11g30360.1  
Orysa4|Os05g01290.1  
AT5G40970,AT3G27030 Orysa4|Os04g31870.1,Orysa4|Os02g30600.1  
AT5G40980,AT3G01940 Orysa4|Os02g30550.1,Orysa4|Os01g69890.1  
AT5G50660,AT5G50560  
Orysa4|Os05g01280.1  
AT4G29960 Orysa4|Os04g51780.1  
AT3G46450 Orysa4|Os03g60610.1  
AT5G41950 Orysa4|Os10g37430.1,Orysa4|Os03g02270.1  
AT3G08955,AT3G08960 Orysa4|Os07g49260.1,Orysa4|Os03g18190.1  
Orysa4|Os07g09580.1,Orysa4|Os03g58820.1  
AT5G25580,AT1G18950 Orysa4|Os01g08550.1  
AT3G52770 Orysa4|Os11g05430.1,Orysa4|Os12g05560.1,Orysa4|Os02g32850.1,Orysa4|Os04g33560.1

AT5G66130 Orysa4|Os03g13850.1  
AT2G47340,AT1G02550,AT3G36659 Orysa4|Os12g37480.1  
AT2G21100  
AT5G42510,AT5G42500,AT1G22900,AT1G65870  
Orysa4|Os11g27620.1,Orysa4|Os11g07830.1,Orysa4|Os11g07770.1,Orysa4|Os11g07740.1  
AT2G21110,AT4G38700 Orysa4|Os03g59440.1  
Orysa4|Os11g07670.1,Orysa4|Os11g07680.1,Orysa4|Os11g07710.1,Orysa4|Os11g07690.1,Orysa4|Os12  
g07580.1,Orysa4|Os07g42520.1,Orysa4|Os07g42570.1,Orysa4|Os10g25870.1,Orysa4|Os03g28180.1,Orysa4|Os11g  
42500.1,Orysa4|Os11g42550.1,Orysa4|Os07g01680.1,Orysa4|Os07g01660.1,Orysa4|Os07g01620.1,Orysa4|Os07g0  
1630.1,Orysa4|Os08g28790.1,Orysa4|Os11g10870.1,Orysa4|Os11g10790.1,Orysa4|Os11g10840.1,Orysa4|Os11g108  
50.1,Orysa4|Os11g10800.1  
AT1G55210,AT3G13660,AT5G49040,AT3G13662,AT3G13650,AT1G58170  
AT3G15520 Orysa4|Os07g37830.1  
AT2G32150  
AT5G59480,AT5G59490  
AT3G62040 Orysa4|Os07g44060.1  
AT5G02230 Orysa4|Os01g74152.1,Orysa4|Os03g16670.1  
AT1G50940 Orysa4|Os03g61920.1  
AT5G14800 Orysa4|Os01g71990.1  
AT5G23890,AT5G52410 Orysa4|Os03g64400.1  
AT3G25680 Orysa4|Os06g30390.1  
Orysa4|Os06g04620.1  
Orysa4|Os04g30550.1  
AT3G51160,AT5G66280  
AT4G31430 Orysa4|Os04g56140.1  
Orysa4|Os03g13490.1  
Orysa4|Os05g15700.1  
AT3G55820  
AT3G61800 Orysa4|Os02g19170.1  
AT5G13070 Orysa4|Os09g31190.1,Orysa4|Os02g48670.1  
Orysa4|Os01g72980.1  
AT2G13440  
AT2G40730 Orysa4|Os01g60440.1  
Orysa4|Os05g51500.1  
AT2G27700,AT1G21160,AT1G76720,AT1G76825,AT1G76810  
AT1G76820 Orysa4|Os01g40150.1  
Orysa4|Os09g26480.1  
AT2G01080 Orysa4|Os03g15630.1  
AT5G09225 Orysa4|Os12g03980.1,Orysa4|Os11g04174.1  
Orysa4|Os03g51960.1  
AT5G65840 Orysa4|Os03g51950.1  
AT1G80190 Orysa4|Os05g37980.1  
AT1G68660 Orysa4|Os08g33540.1  
AT4G36480 Orysa4|Os10g11200.1,Orysa4|Os02g56300.1,Orysa4|Os03g14800.1  
AT2G46210,AT3G61580 Orysa4|Os09g16920.1  
AT4G25940,AT5G57200 Orysa4|Os02g07900.1,Orysa4|Os06g45050.1,Orysa4|Os06g48630.1  
AT1G33340 Orysa4|Os11g14000.1  
AT4G40080  
AT1G14910,AT2G01600 Orysa4|Os05g47550.1,Orysa4|Os01g50010.1  
AT5G35200 Orysa4|Os02g55970.1,Orysa4|Os06g07830.1  
AT4G09980 Orysa4|Os03g05420.1,Orysa4|Os01g16180.1,Orysa4|Os10g31030.1  
AT1G13380 Orysa4|Os09g10910.1  
Orysa4|Os04g58160.1,Orysa4|Os04g58170.1,Orysa4|Os10g35294.1  
AT1G68220 Orysa4|Os08g16130.1  
AT1G61065,AT4G27435,AT3G15480,AT1G52910 Orysa4|Os07g27810.1  
AT3G26950 Orysa4|Os11g31110.1  
AT5G24450,AT3G49410 Orysa4|Os01g34420.1,Orysa4|Os01g34430.1  
AT4G22000 Orysa4|Os05g02410.1  
AT5G38520 Orysa4|Os05g34630.1  
AT1G03110Orysa4|Os03g53530.1  
AT1G56180 Orysa4|Os02g07250.1  
Orysa4|Os01g54880.1  
AT5G56360 Orysa4|Os01g16970.1  
AT2G42390  
AT3G55800 Orysa4|Os04g16680.1  
Orysa4|Os07g09140.1,Orysa4|Os07g09150.1,Orysa4|Os07g29240.1,Orysa4|Os03g63380.1  
AT4G14100,AT3G23760  
AT5G66930 Orysa4|Os12g24060.1  
Orysa4|Os11g14230.1  
AT3G25470  
AT4G38810 Orysa4|Os10g09850.1,Orysa4|Os03g14590.1  
AT3G56210 Orysa4|Os03g46310.1  
AT2G32640 Orysa4|Os08g32630.1  
AT3G04870 Orysa4|Os07g10490.1  
AT3G10970 Orysa4|Os05g07632.1  
AT3G21810 Orysa4|Os06g46890.1,Orysa4|Os02g06584.1  
AT2G27830 Orysa4|Os02g32070.1,Orysa4|Os02g32580.1,Orysa4|Os04g33310.1,Orysa4|Os06g04480.1  
AT2G41680 Orysa4|Os07g46410.1  
Orysa4|Os04g44260.1  
AT4G35460,AT2G17420  
Orysa4|Os06g22140.1,Orysa4|Os02g48290.1  
AT3G11220Orysa4|Os06g43280.1

AT3G58050,AT2G41960 Orysa4|Os03g12550.1,Orysa4|Os10g01610.1  
Orysa4|Os09g10740.1  
AT2G42210 Orysa4|Os02g48610.1  
Orysa4|Os04g21160.1  
AT5G14180 Orysa4|Os08g41780.1  
Orysa4|Os06g42860.1  
AT2G15230  
AT1G72990 Orysa4|Os05g46200.1  
AT2G03070 Orysa4|Os03g31010.1  
Orysa4|Os01g68670.1  
AT4G16500  
Orysa4|Os01g16430.1  
AT2G40880  
Orysa4|Os01g68660.1  
AT5G05110  
AT5G47550  
AT5G12140 Orysa4|Os05g41460.1  
Orysa4|Os05g33880.1  
AT3G12490  
Orysa4|Os01g58890.1  
AT5G16280 Orysa4|Os03g57300.1  
AT5G18170,AT3G03910 Orysa4|Os03g58040.1  
Orysa4|Os02g43470.1  
AT5G07440  
Orysa4|Os04g45970.1  
AT4G04610,AT4G21990,AT1G62180 Orysa4|Os07g32570.1  
AT3G21820 Orysa4|Os04g53700.1  
Orysa4|Os06g39690.1  
AT5G20140  
Orysa4|Os01g67580.1  
AT1G30410,AT1G30420  
Orysa4|Os04g49900.1  
AT1G04120 Orysa4|Os03g04920.1  
AT3G60970,AT3G60160 Orysa4|Os04g49890.1  
AT2G34660,AT1G30400 Orysa4|Os04g52900.1  
AT1G71330  
AT2G47800,AT3G62700 Orysa4|Os01g25386.1,Orysa4|Os04g13210.1  
AT3G21250 Orysa4|Os06g36650.1,Orysa4|Os05g10730.1  
AT2G07680 Orysa4|Os06g08560.1  
AT3G13080,AT3G13090,AT3G13100 Orysa4|Os02g18700.1,Orysa4|Os02g18670.1,Orysa4|Os01g07870.1  
AT3G59140 Orysa4|Os11g05700.1,Orysa4|Os06g06440.1,Orysa4|Os12g37580.1  
Orysa4|Os10g21280.1  
Orysa4|Os11g32770.1  
Orysa4|Os12g10580.1,Orysa4|Os05g35330.1,Orysa4|Os01g58020.1,Orysa4|Os06g39730.1  
AT2G21045 Orysa4|Os04g17660.1,Orysa4|Os02g01220.1  
AT5G66170  
AT5G66040,AT4G35770  
Orysa4|Os06g50930.1  
AT2G17850 Orysa4|Os12g24020.1,Orysa4|Os02g06290.1  
AT4G14145 Orysa4|Os03g17910.1  
Orysa4|Os05g38560.1  
AT3G46030,AT3G45980,AT5G59910,AT1G07790,AT5G22880,AT2G28720,AT3G53650,AT2G37470,AT3G09480,AT5  
G02570 Orysa4|Os01g06010.1,Orysa4|Os05g49860.1,Orysa4|Os01g05610.1,Orysa4|Os01g05630.1,Orysa4|Os01  
g05900.1,Orysa4|Os01g05970.1,Orysa4|Os01g05990.1,Orysa4|Os01g05950.1,Orysa4|Os01g31810.1,Orysa4|Os03g  
17084.1,Orysa4|Os08g38300.1  
AT1G08170 Orysa4|Os09g39730.1  
Orysa4|Os05g38270.1,Orysa4|Os01g62810.1  
AT3G55580  
AT3G53830  
AT1G25260 Orysa4|Os12g01430.1,Orysa4|Os11g01420.1  
Orysa4|Os10g18234.1  
AT4G32440,AT2G25590  
AT5G20030 Orysa4|Os06g39900.1  
Orysa4|Os03g58190.1  
Orysa4|Os01g42540.1  
AT3G06890 Orysa4|Os07g47660.1,Orysa4|Os03g22360.1  
AT4G38690,AT4G34920,AT4G34930 Orysa4|Os09g36520.1  
AT4G10110 Orysa4|Os01g13490.1,Orysa4|Os01g65530.1  
Orysa4|Os01g13360.1  
Orysa4|Os02g18840.1,Orysa4|Os06g23290.1  
AT3G43950  
AT1G64460,AT1G64470,AT5G24240,AT2G46500 Orysa4|Os05g51230.1  
AT1G27890,AT1G27820,AT1G61470,AT3G44240,AT1G06450  
Orysa4|Os10g03880.1,Orysa4|Os10g03530.1,Orysa4|Os10g03560.1,Orysa4|Os07g07430.1,Orysa4|Os06  
g30770.1,Orysa4|Os06g30790.1,Orysa4|Os06g34520.1,Orysa4|Os03g53260.1  
Orysa4|Os09g24990.1,Orysa4|Os02g55300.1  
AT3G44260,AT5G22250  
AT1G15920  
Orysa4|Os04g58810.1  
AT1G80780,AT2G32070,AT5G10960  
AT1G47720

Orysa4|Os03g43420.1  
AT3G16175 Orysa4|Os01g12920.1,Orysa4|Os01g12910.1  
AT5G27710 Orysa4|Os07g47570.1  
AT1G74140,AT1G74130,AT1G18600 Orysa4|Os01g55740.1  
AT5G20180 Orysa4|Os03g59720.1  
AT5G56300  
AT4G36470 Orysa4|Os01g50480.1,Orysa4|Os01g50610.1  
Orysa4|Os06g13460.1  
AT5G55250 Orysa4|Os04g56950.1  
Orysa4|Os10g09360.1  
Orysa4|Os06g20770.1,Orysa4|Os06g20630.1,Orysa4|Os02g48770.1,Orysa4|Os06g13390.1,Orysa4|Os06  
g13350.1,Orysa4|Os06g13310.1,Orysa4|Os06g13530.1,Orysa4|Os06g13560.1,Orysa4|Os06g13470.1,Orysa4|Os06g  
13490.1,Orysa4|Os06g13520.1,Orysa4|Os11g15130.1,Orysa4|Os11g15180.1,Orysa4|Os11g15040.1,Orysa4|Os11g15  
060.1,Orysa4|Os11g15030.1,Orysa4|Os11g15410.1,Orysa4|Os11g15300.1,Orysa4|Os11g15310.1  
Orysa4|Os06g13510.1,Orysa4|Os06g21720.1  
Orysa4|Os04g57070.1,Orysa4|Os04g57080.1,Orysa4|Os06g21820.1,Orysa4|Os06g21760.1,Orysa4|Os04  
g57090.1  
Orysa4|Os06g21020.1,Orysa4|Os06g20960.1,Orysa4|Os06g20920.1,Orysa4|Os06g20790.1,Orysa4|Os06  
g22440.1,Orysa4|Os05g01140.1  
Orysa4|Os11g15340.1  
AT1G19640  
AT5G66430,AT5G04370,AT5G04380,AT3G11480,AT3G21950,AT5G38020,AT2G14060  
AT1G51745 Orysa4|Os01g37790.1  
AT3G53450,AT2G37210,AT2G28305 Orysa4|Os02g41770.1,Orysa4|Os04g43840.1  
Orysa4|Os05g51390.1,Orysa4|Os01g40630.1  
Orysa4|Os03g49050.1  
AT5G03270  
Orysa4|Os03g01880.1,Orysa4|Os10g33900.1  
AT2G35990 Orysa4|Os03g64070.1  
AT5G06300  
AT5G26140,AT5G11950 Orysa4|Os05g46360.1,Orysa4|Os01g51210.1  
AT4G35190 Orysa4|Os09g37540.1  
AT3G13677 Orysa4|Os03g38500.1  
Orysa4|Os06g45640.1,Orysa4|Os02g07450.1  
Orysa4|Os04g58680.1  
AT1G56170  
AT5G38140,AT5G27910,AT5G50490,AT5G50470,AT5G50480  
AT1G54830,AT1G08970  
AT5G63470,AT3G48590 Orysa4|Os09g30310.1,Orysa4|Os08g38780.1,Orysa4|Os03g14669.1  
Orysa4|Os08g10560.1  
AT3G21440  
AT3G21430 Orysa4|Os01g09760.1  
AT5G27610,AT3G05380  
Orysa4|Os03g43800.1  
AT5G07380 Orysa4|Os01g01400.1  
AT3G25760,AT3G25770,AT3G25780,AT1G13280  
Orysa4|Os03g32314.1  
AT3G05590,AT5G27850 Orysa4|Os07g47780.1,Orysa4|Os03g22180.1,Orysa4|Os05g06310.1  
AT2G47570  
AT4G18240 Orysa4|Os01g52250.1,Orysa4|Os05g45720.1  
AT5G65685  
Orysa4|Os02g56320.1  
AT1G11720 Orysa4|Os08g09230.1,Orysa4|Os04g53310.1  
AT5G24680 Orysa4|Os02g01710.1  
AT1G54860  
AT5G19240,AT5G19230,AT5G19250,AT3G06035 Orysa4|Os07g45060.1  
AT5G41360,AT5G41370 Orysa4|Os01g49680.1  
AT4G26160,AT4G29670  
AT2G33270  
AT5G61440  
Orysa4|Os05g11090.1  
AT1G08570 Orysa4|Os03g21000.1,Orysa4|Os07g48510.1  
AT5G61820 Orysa4|Os08g42590.1  
AT4G29000,AT2G20110 Orysa4|Os01g55580.1  
AT3G16160 Orysa4|Os08g27640.1,Orysa4|Os08g28214.1  
AT5G25790 Orysa4|Os06g22670.1,Orysa4|Os02g17460.1  
AT4G28830 Orysa4|Os06g06730.1  
AT1G24706 Orysa4|Os01g68810.1  
AT1G60070,AT1G23940,AT1G23900 Orysa4|Os02g56110.1,Orysa4|Os06g07090.1  
AT1G31730 Orysa4|Os01g68750.1  
AT3G24160 Orysa4|Os08g45220.1  
AT1G19750,AT1G27840 Orysa4|Os01g63900.1,Orysa4|Os02g20430.1  
AT3G52090 Orysa4|Os07g07610.1  
AT5G61970 Orysa4|Os08g23360.1  
AT2G36740 Orysa4|Os08g09320.1  
AT4G21150 Orysa4|Os01g68324.1  
Orysa4|Os11g38050.1  
AT3G03540,AT3G03530,AT3G03520  
AT3G48610  
AT2G26870 Orysa4|Os11g38060.1,Orysa4|Os03g63580.1  
AT1G07230 Orysa4|Os03g61130.1  
AT1G08020

AT1G08030 Orysa4|Os06g06370.1  
 AT3G16350 Orysa4|Os01g09280.1  
 AT5G47390 Orysa4|Os11g45220.1  
 AT5G62750 Orysa4|Os08g30800.1  
 AT1G25490  
 AT3G25800,AT1G13320 Orysa4|Os09g07510.1  
 AT4G27070,AT5G54810 Orysa4|Os08g04180.1  
 AT5G28237  
 AT3G61200 Orysa4|Os07g27960.1,Orysa4|Os07g27870.1  
 AT4G16250,AT2G18790,AT4G18130  
 AT5G35840 Orysa4|Os03g54084.1  
 AT1G09570 Orysa4|Os03g51030.1  
 AT4G08240 Orysa4|Os02g35890.1  
 AT5G66530 Orysa4|Os09g15820.1  
 AT5G14500,AT3G01590  
 AT3G61610 Orysa4|Os05g49430.1,Orysa4|Os01g46950.1  
 Orysa4|Os08g14330.1,Orysa4|Os04g51390.1  
 AT4G23730 Orysa4|Os04g56290.1  
 AT5G57330  
 AT4G25900 Orysa4|Os02g08030.1  
 AT2G03680 Orysa4|Os12g31780.1,Orysa4|Os11g41150.1  
 Orysa4|Os04g48870.1  
 AT3G02180,AT5G15600  
 AT4G23496 Orysa4|Os03g30430.1  
 AT1G69230  
 AT1G09300 Orysa4|Os12g37640.1  
 AT5G66860  
 AT4G23620 Orysa4|Os05g18750.1,Orysa4|Os01g41030.1  
 AT1G70760 Orysa4|Os05g28090.1  
 AT4G24510,AT4G13840,AT3G23840 Orysa4|Os04g52164.1  
 Orysa4|Os04g27150.1  
 Orysa4|Os03g15570.1  
 AT2G18530  
 AT4G08480 Orysa4|Os02g53030.1  
 Orysa4|Os02g53040.1  
 AT3G07980,AT3G13530 Orysa4|Os04g56530.1  
 AT2G18770,AT5G05670 Orysa4|Os06g27870.1,Orysa4|Os08g41250.1  
 AT2G32040 Orysa4|Os03g58080.1,Orysa4|Os07g07654.1  
 AT5G54860  
 AT3G60245,AT3G10950 Orysa4|Os01g48770.1,Orysa4|Os05g48320.1  
 AT4G32820 Orysa4|Os03g48100.1  
 Orysa4|Os07g23790.1  
 AT3G24740 Orysa4|Os04g04010.1  
 AT1G68140,AT4G08460,AT1G77770 Orysa4|Os09g27860.1,Orysa4|Os02g35840.1  
 AT3G25910 Orysa4|Os01g42700.1  
 AT2G26050,AT1G80220,AT5G38370,AT1G15430  
 AT4G31410 Orysa4|Os02g05710.1,Orysa4|Os06g47860.1  
 AT1G56500 Orysa4|Os03g19760.1  
 AT2G28725,AT1G07795 Orysa4|Os12g37900.1  
 Orysa4|Os02g44330.1  
 AT4G16510  
 AT2G20920 Orysa4|Os03g04440.1  
 AT1G64600 Orysa4|Os07g20150.1  
 Orysa4|Os03g01230.1  
 Orysa4|Os12g37370.1  
 AT3G16980,AT4G16265  
 Orysa4|Os07g01030.1  
 AT5G01220 Orysa4|Os03g15840.1,Orysa4|Os01g04920.1  
 AT4G19400 Orysa4|Os05g15180.1  
 AT1G01160,AT4G00850 Orysa4|Os12g31350.1  
 AT5G27410,AT3G05190 Orysa4|Os03g24460.1  
 AT4G24680 Orysa4|Os11g47100.1,Orysa4|Os11g46250.1,Orysa4|Os12g37860.1  
 AT1G08120,AT5G26110 Orysa4|Os10g28640.1  
 AT5G25590,AT1G52320 Orysa4|Os05g32760.1  
 Orysa4|Os01g31580.1  
 Orysa4|Os03g27270.1,Orysa4|Os11g35830.1,Orysa4|Os06g08190.1,Orysa4|Os07g02740.1,Orysa4|Os02g43770.1  
 Orysa4|Os07g11070.1  
 AT1G02110,AT3G60320 Orysa4|Os10g41310.1  
 Orysa4|Os01g40330.1  
 Orysa4|Os09g36760.1  
 AT4G28910 Orysa4|Os05g48500.1  
 AT5G14760 Orysa4|Os02g04170.1  
 Orysa4|Os10g01570.1,Orysa4|Os03g12570.1  
 AT1G80740

AT1G69770  
AT4G19020 Orysa4|Os05g13780.1  
AT2G30110,AT5G06460  
Orysa4|Os11g01510.1,Orysa4|Os12g01520.1  
Orysa4|Os07g49230.1,Orysa4|Os03g18380.1  
AT5G17790 Orysa4|Os01g59980.1  
AT1G58350,AT1G09980 Orysa4|Os11g06690.1,Orysa4|Os12g06800.1  
AT5G53310 Orysa4|Os01g43360.1  
Orysa4|Os04g59610.1  
AT1G44000  
AT4G11910,AT4G22920  
Orysa4|Os09g36200.1  
AT1G15010,AT2G01300 Orysa4|Os05g44060.1  
AT3G52040 Orysa4|Os01g16550.1  
AT1G12790 Orysa4|Os05g51060.1  
AT1G78910  
Orysa4|Os09g01620.1  
AT3G19440  
Orysa4|Os09g32560.1  
AT4G27400,AT5G54370,AT1G54890  
Orysa4|Os11g32220.1  
Orysa4|Os07g23690.1  
Orysa4|Os05g47940.1,Orysa4|Os11g05360.1,Orysa4|Os04g33520.1,Orysa4|Os01g73710.1,Orysa4|Os01  
g73720.1,Orysa4|Os01g73700.1,Orysa4|Os01g73730.1,Orysa4|Os05g01680.1  
AT5G60520,AT5G60530  
Orysa4|Os10g42150.1  
AT4G28470,AT2G20580,AT4G08140 Orysa4|Os06g48640.1,Orysa4|Os09g15750.1,Orysa4|Os02g05340.1  
Orysa4|Os03g49450.1  
AT4G02725  
AT4G00050,AT1G02340,AT3G62090,AT1G68240  
Orysa4|Os05g04740.1,Orysa4|Os01g18290.1  
Orysa4|Os10g34680.1  
AT1G71270,AT1G71300 Orysa4|Os03g30460.1  
Orysa4|Os03g14090.1,Orysa4|Os10g05730.1  
AT5G66200,AT4G36030,AT4G34940 Orysa4|Os08g43500.1,Orysa4|Os09g36550.1  
AT3G26600  
Orysa4|Os01g67910.1  
AT2G44920  
Orysa4|Os01g05080.1  
AT1G26940 Orysa4|Os11g38990.1  
AT1G54650 Orysa4|Os07g23169.1  
AT1G12230 Orysa4|Os08g05830.1  
AT2G04700 Orysa4|Os09g07570.1  
AT2G46230,AT1G26530 Orysa4|Os06g06410.1  
AT3G59300 Orysa4|Os01g67370.1  
AT5G24060 Orysa4|Os11g34130.1  
AT1G53450,AT3G14830 Orysa4|Os06g05950.1  
Orysa4|Os05g45400.1,Orysa4|Os01g52920.1  
AT3G55860,AT3G60660 Orysa4|Os07g30110.1  
AT1G79800 Orysa4|Os06g36010.1  
AT5G26330 Orysa4|Os07g38290.1  
AT4G31840,AT2G25060,AT5G25090,AT2G23990,AT4G30590,AT5G57920  
Orysa4|Os06g50650.1,Orysa4|Os06g50420.1  
AT1G17800  
Orysa4|Os07g02200.1,Orysa4|Os03g55120.1  
AT2G02850 Orysa4|Os03g15340.1,Orysa4|Os03g50160.1  
Orysa4|Os02g48820.1  
AT4G01380,AT1G45063,AT3G53330,AT3G28958  
Orysa4|Os07g07170.1,Orysa4|Os03g57740.1  
Orysa4|Os02g49350.1  
AT5G07475  
AT2G26720,AT2G31050  
AT5G20230  
Orysa4|Os06g17730.1,Orysa4|Os01g16610.1,Orysa4|Os08g17160.1,Orysa4|Os02g06690.1  
Orysa4|Os02g49850.1  
AT2G32300 Orysa4|Os04g53710.1,Orysa4|Os07g01440.1  
AT3G60270,AT3G60280,AT2G44790 Orysa4|Os02g43660.1,Orysa4|Os04g46130.1  
AT3G27200,AT1G22480,AT1G72230 Orysa4|Os11g24140.1  
Orysa4|Os06g11490.1,Orysa4|Os02g52180.1,Orysa4|Os07g35860.1,Orysa4|Os03g57730.1,Orysa4|Os08  
g37670.1,Orysa4|Os09g29390.1,Orysa4|Os08g37660.1  
Orysa4|Os09g36940.1,Orysa4|Os03g44630.1  
AT4G12880,AT5G15350,AT3G01070,AT2G27035  
AT1G48940,AT3G18590 Orysa4|Os04g57750.1  
Orysa4|Os09g38540.1  
Orysa4|Os02g15710.1,Orysa4|Os02g15730.1,Orysa4|Os04g34480.1  
AT4G28365,AT4G32490,AT4G27520 Orysa4|Os01g54430.1,Orysa4|Os01g10480.1  
Orysa4|Os03g50140.1  
Orysa4|Os08g04350.1,Orysa4|Os08g04340.1,Orysa4|Os08g04360.1,Orysa4|Os08g04310.1,Orysa4|Os01  
g57690.1,Orysa4|Os12g05470.1  
AT1G64640 Orysa4|Os03g02400.1  
Orysa4|Os05g49580.1  
AT3G20570 Orysa4|Os01g57880.1



AT5G17560 Orysa4|Os06g28970.1  
AT5G17230 Orysa4|Os06g51290.1  
Orysa4|Os09g38320.1  
Orysa4|Os12g43130.1  
AT2G39130,AT3G54830 Orysa4|Os04g12508.1  
Orysa4|Os11g19240.1  
Orysa4|Os05g30150.1,Orysa4|Os01g40410.1,Orysa4|Os01g41400.1,Orysa4|Os01g40360.1,Orysa4|Os01g40380.1  
Orysa4|Os08g31900.1  
Orysa4|Os12g38570.1  
AT2G41190 Orysa4|Os02g54730.1  
Orysa4|Os04g38660.1  
Orysa4|Os04g12499.1,Orysa4|Os04g12530.1,Orysa4|Os02g01100.1  
Orysa4|Os06g12320.1  
AT5G16740 Orysa4|Os04g38680.1  
AT5G15240,AT3G28960  
AT3G09340,AT3G09330,AT5G02170,AT5G02180  
Orysa4|Os04g38670.1  
AT5G17370 Orysa4|Os07g01730.1  
AT5G56960 Orysa4|Os05g11070.1,Orysa4|Os01g09990.1,Orysa4|Os01g39330.1,Orysa4|Os02g12820.1  
Orysa4|Os12g33990.1  
AT5G26960 Orysa4|Os03g30160.1,Orysa4|Os12g04130.1,Orysa4|Os11g04330.1  
AT2G43250 Orysa4|Os04g41330.1  
AT3G54720 Orysa4|Os03g57660.1  
AT4G07670,AT5G19740 Orysa4|Os01g53800.1,Orysa4|Os01g53810.1,Orysa4|Os01g54010.1  
AT1G48630,AT3G18130,AT1G18080 Orysa4|Os01g49290.1,Orysa4|Os05g47890.1  
AT5G35400 Orysa4|Os06g45250.1  
AT5G59980 Orysa4|Os12g01060.1,Orysa4|Os11g01074.1,Orysa4|Os12g07680.1  
AT4G36250 Orysa4|Os02g43194.1,Orysa4|Os04g45720.1  
AT1G44170,AT4G34240 Orysa4|Os12g07810.1,Orysa4|Os11g08300.1  
AT5G19140 Orysa4|Os11g05050.1  
AT4G27450,AT3G15450 Orysa4|Os04g58280.1  
AT5G43830,AT3G22850 Orysa4|Os03g58170.1,Orysa4|Os03g53270.1  
AT3G26360 Orysa4|Os03g48830.1  
AT2G19560 Orysa4|Os09g21760.1  
AT1G58070 Orysa4|Os12g08160.1,Orysa4|Os11g09040.1  
AT5G13700 Orysa4|Os09g20260.1,Orysa4|Os09g20284.1  
AT5G54080 Orysa4|Os06g01360.1  
AT2G38000 Orysa4|Os05g25210.1  
AT3G47430 Orysa4|Os04g45210.1  
AT3G19840 Orysa4|Os10g34380.1  
AT4G38090 Orysa4|Os08g37310.1  
AT3G59090 Orysa4|Os01g54784.1  
Orysa4|Os10g30320.1,Orysa4|Os03g06070.1  
AT4G35890,AT5G66100 Orysa4|Os09g02330.1,Orysa4|Os09g36920.1  
AT1G34200,AT4G09670 Orysa4|Os10g26400.1  
Orysa4|Os10g26390.1  
AT1G66130  
AT3G43230 Orysa4|Os07g17130.1  
Orysa4|Os07g42500.1  
AT1G29800 Orysa4|Os06g35910.1,Orysa4|Os02g13890.1  
AT4G18270 Orysa4|Os01g11260.1  
Orysa4|Os08g43130.1  
AT2G35110  
AT3G42050 Orysa4|Os07g36480.1  
Orysa4|Os07g36470.1  
AT2G47790 Orysa4|Os12g19590.1  
AT1G56460 Orysa4|Os03g59680.1,Orysa4|Os12g37430.1  
AT3G06660  
AT2G47350 Orysa4|Os08g08040.1  
AT2G03870 Orysa4|Os12g08810.1  
Orysa4|Os12g41800.1,Orysa4|Os01g67520.1  
AT5G55120,AT4G26850  
AT1G77840,AT1G36730 Orysa4|Os06g48350.1,Orysa4|Os09g15770.1  
AT3G52940 Orysa4|Os09g39220.1,Orysa4|Os01g25189.1  
AT3G18360,AT1G68450 Orysa4|Os06g40090.1  
AT1G21326 Orysa4|Os02g33600.1,Orysa4|Os08g01260.1  
AT1G27070 Orysa4|Os03g48170.1  
AT5G24460 Orysa4|Os06g49780.1  
AT1G44770 Orysa4|Os03g49490.1  
Orysa4|Os06g09890.1  
AT2G26280 Orysa4|Os03g08270.1  
AT2G43980 Orysa4|Os09g34300.1  
AT4G00755 Orysa4|Os03g64360.1,Orysa4|Os03g02560.1  
AT5G28740 Orysa4|Os11g02510.1,Orysa4|Os06g12910.1,Orysa4|Os01g49270.1,Orysa4|Os07g44970.1

AT4G20070 Orysa4|Os06g45480.1  
Orysa4|Os02g47430.1  
AT4G22550 Orysa4|Os02g44290.1  
AT3G51140  
AT5G23040 Orysa4|Os09g21250.1,Orysa4|Os08g32130.1  
AT3G21500,AT4G15560  
AT5G11380Orysa4|Os06g05100.1  
Orysa4|Os05g33840.1  
Orysa4|Os07g09190.1  
AT5G14260 Orysa4|Os12g13460.1  
AT1G48380 Orysa4|Os06g51380.1  
AT5G04840 Orysa4|Os02g33560.1  
AT1G03190  
Orysa4|Os05g05260.1  
Orysa4|Os06g33130.1  
AT5G18670 Orysa4|Os10g07130.1,Orysa4|Os02g49580.1,Orysa4|Os03g22790.1,Orysa4|Os07g47120.1  
Orysa4|Os01g13550.1  
AT3G23920 Orysa4|Os03g04770.1  
Orysa4|Os01g70700.1  
AT5G45300 Orysa4|Os02g03690.1  
AT4G17090 Orysa4|Os10g41550.1  
AT4G00490 Orysa4|Os09g39570.1  
AT2G45880  
AT5G55700  
AT4G15210,AT2G32290 Orysa4|Os07g35880.1  
AT1G16370,AT1G79410  
AT1G16390,AT1G79360  
Orysa4|Os07g37510.1,Orysa4|Os07g37530.1,Orysa4|Os01g10240.1,Orysa4|Os01g22700.1,Orysa4|Os01  
g22710.1,Orysa4|Os07g37454.1  
AT3G20660 Orysa4|Os04g53930.1  
AT1G73220  
AT4G28430,AT2G20590 Orysa4|Os02g19990.1  
AT1G07705,AT5G59710 Orysa4|Os02g54120.1  
Orysa4|Os05g40790.1  
AT4G24580 Orysa4|Os03g15180.1,Orysa4|Os03g11140.1  
AT5G19390,AT5G12150 Orysa4|Os07g46450.1,Orysa4|Os03g24180.1  
AT4G14342,AT3G23325 Orysa4|Os08g34480.1  
AT5G40710  
AT5G63280 Orysa4|Os12g13130.1  
AT2G43350,AT2G31570  
AT2G48150,AT3G63080  
AT2G25080,AT4G31870 Orysa4|Os06g08670.1  
AT1G63460,AT4G11600 Orysa4|Os04g46960.1,Orysa4|Os02g44500.1  
AT1G79390 Orysa4|Os02g29320.1  
AT5G64980 Orysa4|Os05g32810.1  
AT4G02880,AT1G03290 Orysa4|Os10g16440.1  
AT1G02660,AT3G62590 Orysa4|Os01g15000.1  
AT3G61680 Orysa4|Os01g43140.1  
AT4G02485 Orysa4|Os11g43610.1  
Orysa4|Os12g34450.1,Orysa4|Os12g34460.1  
AT4G02980  
Orysa4|Os02g46130.1,Orysa4|Os02g04700.1  
AT4G26870,AT4G31180  
AT2G20890 Orysa4|Os07g37250.1  
AT4G34350 Orysa4|Os03g52180.1,Orysa4|Os03g52170.1  
Orysa4|Os03g52210.1  
AT2G31530 Orysa4|Os05g33020.1  
Orysa4|Os04g06790.1  
Orysa4|Os01g40450.1,Orysa4|Os05g51470.1  
AT3G58670,AT2G42670  
AT5G15120,AT5G39890 Orysa4|Os01g09030.1  
Orysa4|Os03g45210.1,Orysa4|Os03g45250.1,Orysa4|Os08g37470.1  
AT1G18490 Orysa4|Os08g04010.1,Orysa4|Os08g03870.1  
Orysa4|Os09g14700.1  
AT1G57600 Orysa4|Os05g05200.1  
AT5G11800,AT2G19600 Orysa4|Os06g36590.1  
AT5G51710 Orysa4|Os03g03590.1  
AT1G49880  
Orysa4|Os03g10850.1  
AT2G19570,AT4G29650,AT4G29610,AT4G29640,AT4G29630,AT4G29600,AT4G29620,AT4G29580,AT4G29570  
Orysa4|Os06g40910.1,Orysa4|Os01g51540.1  
AT5G45160  
AT3G13870,AT1G72960 Orysa4|Os01g39310.1  
Orysa4|Os11g37260.1  
Orysa4|Os12g41170.1  
AT1G67210,AT5G38600 Orysa4|Os06g30020.1  
AT1G75510 Orysa4|Os05g43450.1,Orysa4|Os01g56550.1  
AT3G52270  
AT4G24620 Orysa4|Os08g37380.1,Orysa4|Os09g29070.1  
AT3G21700,AT5G54840 Orysa4|Os07g33850.1  
AT3G47930 Orysa4|Os11g04740.1  
AT3G20510,AT1G50740 Orysa4|Os03g38790.1

Orysa4|Os06g41790.1  
AT1G20880,AT1G76460  
Orysa4|Os03g17760.1  
Orysa4|Os01g72834.1  
AT1G22910  
AT1G78260,AT1G22330 Orysa4|Os06g11730.1,Orysa4|Os02g51890.1  
AT1G33470  
AT3G54770  
Orysa4|Os01g65550.1  
AT2G46780  
Orysa4|Os02g48340.1  
Orysa4|Os03g14190.1  
AT5G53680,AT5G53720,AT1G22335,AT3G06970  
AT4G21880,AT4G04790 Orysa4|Os02g03970.1  
AT4G33670 Orysa4|Os12g29760.1  
AT4G09680 Orysa4|Os09g20910.1  
AT3G62190 Orysa4|Os07g44310.1  
Orysa4|Os08g38210.1  
AT1G69010,AT5G08130,AT5G38860 Orysa4|Os02g49480.1  
AT2G19180,AT1G78890,AT1G16840 Orysa4|Os06g45060.1,Orysa4|Os08g13320.1  
AT1G19710,AT1G75420 Orysa4|Os01g15780.1  
AT5G62960 Orysa4|Os01g07700.1  
AT3G27770  
AT1G70505  
AT1G10660  
AT2G47115Orysa4|Os01g19120.1,Orysa4|Os07g46430.1  
AT1G04960 Orysa4|Os09g30478.1  
AT1G44674,AT1G27000,AT2G02730 Orysa4|Os01g08990.1  
AT1G11480Orysa4|Os10g41600.1,Orysa4|Os07g36200.1  
AT5G24314 Orysa4|Os01g50930.1  
AT1G73110Orysa4|Os04g56320.1  
AT2G39730 Orysa4|Os11g47970.1  
Orysa4|Os11g47980.1  
AT1G19870 Orysa4|Os04g56740.1  
AT4G34190 Orysa4|Os11g40600.1  
AT2G32980 Orysa4|Os08g10410.1  
AT5G41850 Orysa4|Os05g12330.1  
AT5G43860 Orysa4|Os10g28370.1  
Orysa4|Os02g18500.1  
AT1G19670  
AT3G51270 Orysa4|Os01g66520.1  
AT3G17810 Orysa4|Os02g50350.1  
AT1G36180,AT1G36160 Orysa4|Os05g22940.1,Orysa4|Os10g21910.1  
Orysa4|Os02g05900.1,Orysa4|Os06g47770.1  
AT3G12540,AT2G39690 Orysa4|Os01g05480.1  
AT4G33130,AT3G47675  
AT5G66600,AT2G23700 Orysa4|Os07g03140.1,Orysa4|Os03g55890.1,Orysa4|Os03g13130.1  
AT1G21060,AT1G76620,AT1G43020 Orysa4|Os08g40420.1,Orysa4|Os09g32010.1  
AT3G18900  
AT1G16750  
AT5G60720 Orysa4|Os03g64230.1  
AT5G47380 Orysa4|Os10g41040.1  
AT3G13000 Orysa4|Os06g49060.1  
AT3G09860 Orysa4|Os03g38120.1  
AT3G21190,AT1G51630 Orysa4|Os09g32320.1  
AT2G06030,AT2G06040,AT5G21900 Orysa4|Os08g35700.1  
AT2G44580 Orysa4|Os05g02810.1  
AT5G06340,AT3G10620 Orysa4|Os04g58900.1  
AT1G30110  
AT5G42850 Orysa4|Os06g21550.1  
AT3G53470 Orysa4|Os03g17660.1  
Orysa4|Os04g30800.1  
AT3G25040  
Orysa4|Os11g28340.1  
AT1G29330  
AT4G34090 Orysa4|Os03g01920.1  
AT2G23370  
AT1G65020 Orysa4|Os10g42630.1  
Orysa4|Os03g11360.1  
AT2G30100 Orysa4|Os10g31790.1  
Orysa4|Os05g28500.1  
Orysa4|Os02g17520.1  
AT1G15220  
AT3G03560 Orysa4|Os03g49960.1  
Orysa4|Os05g01060.1  
AT5G23510,AT5G23490,AT5G08440  
AT2G46830,AT1G01060  
AT3G10113,AT1G18330  
Orysa4|Os08g06110.1  
AT5G37260,AT5G17300 Orysa4|Os06g51260.1  
AT5G11900Orysa4|Os01g09890.1  
Orysa4|Os05g02260.1

AT3G53670,AT2G37480 Orysa4|Os01g59900.1  
Orysa4|Os08g39470.1,Orysa4|Os07g33270.1  
Orysa4|Os10g33990.1,Orysa4|Os04g45834.1,Orysa4|Os04g33760.1,Orysa4|Os10g27350.1,Orysa4|Os12  
g05980.1,Orysa4|Os11g05600.1  
AT5G03230,AT3G45210,AT5G60680,AT2G28400 Orysa4|Os04g43990.1  
AT4G21970,AT4G04630,AT4G26950  
Orysa4|Os05g45450.1,Orysa4|Os01g54450.1  
AT1G29640,AT2G34340,AT5G45630,AT4G18980 Orysa4|Os01g52730.1  
AT3G15040 Orysa4|Os07g32810.1  
AT1G11700,AT1G61930,AT4G21930  
AT3G24315 Orysa4|Os02g44111.1  
Orysa4|Os04g32650.1  
AT1G29880,AT3G44740,AT1G29870  
AT2G35200,AT1G32690 Orysa4|Os02g15670.1,Orysa4|Os02g46620.1,Orysa4|Os04g50176.1  
AT1G04820,AT1G50010,AT4G14960  
AT5G23860  
AT2G29550  
AT5G19780,AT5G19770 Orysa4|Os07g38730.1  
Orysa4|Os03g11970.1  
Orysa4|Os06g07280.1  
Orysa4|Os01g59150.1  
AT1G64740  
AT1G75780,AT1G20010  
Orysa4|Os11g14220.1,Orysa4|Os03g51600.1  
Orysa4|Os05g34170.1  
AT4G20890,AT5G44340 Orysa4|Os02g07060.1,Orysa4|Os06g46000.1,Orysa4|Os03g56810.1  
Orysa4|Os01g18050.1  
AT5G62690,AT5G62700 Orysa4|Os03g01530.1  
AT3G61650,AT5G05620 Orysa4|Os05g06450.1  
AT5G12250  
AT4G22600 Orysa4|Os02g44250.1  
AT3G17170 Orysa4|Os12g37610.1  
AT1G27340 Orysa4|Os01g69940.1  
AT5G27490,AT3G05280 Orysa4|Os01g42480.1  
AT2G39805 Orysa4|Os05g38200.1,Orysa4|Os05g38180.1  
Orysa4|Os02g42740.1  
AT5G52240,AT3G48890 Orysa4|Os10g35870.1  
Orysa4|Os10g35850.1  
AT2G24940  
AT5G42620 Orysa4|Os03g52150.1  
AT5G16780  
Orysa4|Os02g30730.1  
AT3G14700  
AT2G15240 Orysa4|Os09g02170.1  
AT3G25570,AT5G15950,AT3G02470 Orysa4|Os04g42090.1,Orysa4|Os02g39790.1,Orysa4|Os09g25620.1  
AT5G18930 Orysa4|Os09g24600.1,Orysa4|Os05g04990.1  
AT2G31410 Orysa4|Os02g38190.1  
AT2G20410 Orysa4|Os03g64250.1  
Orysa4|Os02g35060.1  
AT3G26410  
AT1G68830 Orysa4|Os05g47560.1  
AT5G01920  
AT3G15840 Orysa4|Os03g38950.1  
AT3G19360 Orysa4|Os01g07930.1  
AT2G35430,AT1G32360 Orysa4|Os08g06330.1  
Orysa4|Os12g25710.1  
AT3G62120  
AT5G52520 Orysa4|Os07g07060.1  
AT5G10880  
AT2G28780,AT3G09450 Orysa4|Os11g01030.1,Orysa4|Os12g01020.1,Orysa4|Os05g41300.1  
AT3G51840 Orysa4|Os05g07090.1,Orysa4|Os01g06600.1  
Orysa4|Os06g23870.1,Orysa4|Os06g23780.1,Orysa4|Os08g08592.1,Orysa4|Os06g23760.1  
AT3G09890 Orysa4|Os03g05260.1  
AT4G38980 Orysa4|Os02g26960.1  
AT1G65900 Orysa4|Os03g02820.1  
AT4G32270 Orysa4|Os02g40030.1  
AT2G44270,AT1G76170 Orysa4|Os01g41570.1,Orysa4|Os02g52470.1  
AT1G79210,AT1G16470 Orysa4|Os02g42320.1,Orysa4|Os03g26970.1  
AT2G39580 Orysa4|Os12g37890.1  
AT5G55560 Orysa4|Os07g39520.1  
AT3G48260 Orysa4|Os05g01780.1  
AT1G49160,AT3G18750 Orysa4|Os11g06140.1  
AT5G28080,AT3G04910,AT3G22420 Orysa4|Os07g38530.1,Orysa4|Os07g08750.1  
AT1G64630,AT5G41990 Orysa4|Os02g45130.1  
AT5G58350,AT3G51630 Orysa4|Os11g02300.1,Orysa4|Os12g02250.1  
AT5G01150,AT5G01140,AT5G01130,AT3G09120,AT3G09110,AT3G09140,AT5G43240,AT5G01120,AT5G37320,AT1  
G11145 Orysa4|Os04g50810.1,Orysa4|Os04g50800.1  
AT3G47350,AT3G47360,AT5G50590,AT5G50690,AT5G50770  
AT3G03330 Orysa4|Os11g16410.1  
AT3G03350  
Orysa4|Os02g30670.1,Orysa4|Os02g30714.1,Orysa4|Os11g30560.1  
AT4G10020 Orysa4|Os03g62590.1

AT5G50600,AT5G50700 Orysa4|Os12g27830.1,Orysa4|Os04g32070.1,Orysa4|Os04g32080.1  
AT1G49540 Orysa4|Os08g38570.1  
AT5G42890 Orysa4|Os01g25500.1,Orysa4|Os02g52720.1,Orysa4|Os06g10890.1  
AT4G17380 Orysa4|Os07g30240.1  
AT4G37090 Orysa4|Os02g09380.1  
AT3G60300 Orysa4|Os11g35870.1  
AT5G46390 Orysa4|Os01g47450.1  
AT3G50430 Orysa4|Os07g02950.1  
AT5G15610,AT3G02200 Orysa4|Os04g01290.1  
Orysa4|Os12g08310.1  
Orysa4|Os03g20920.1  
Orysa4|Os03g21040.1,Orysa4|Os07g48460.1,Orysa4|Os07g48490.1  
AT2G39050 Orysa4|Os07g48500.1,Orysa4|Os01g01450.1  
Orysa4|Os06g43130.1,Orysa4|Os02g09470.1  
AT2G15290  
AT2G04740 Orysa4|Os06g21330.1  
AT1G45150 Orysa4|Os07g39300.1  
AT5G61850 Orysa4|Os04g51000.1  
AT5G42970 Orysa4|Os03g10120.1  
AT1G63960 Orysa4|Os09g09850.1,Orysa4|Os09g09830.1,Orysa4|Os01g48710.1  
AT3G05920,AT5G26690 Orysa4|Os01g14700.1,Orysa4|Os01g14710.1,Orysa4|Os03g25610.1  
AT5G23760 Orysa4|Os10g36200.1  
Orysa4|Os04g45130.1  
Orysa4|Os04g56570.1  
AT1G63950  
AT5G52760,AT5G52750,AT5G52770,AT5G52740  
AT1G01490 Orysa4|Os03g03500.1,Orysa4|Os10g38870.1,Orysa4|Os04g57200.1  
AT5G32470 Orysa4|Os08g45160.1  
AT5G11580,Orysa4|Os01g52630.1  
AT1G79460  
Orysa4|Os04g52240.1,Orysa4|Os04g52210.1,Orysa4|Os04g52230.1,Orysa4|Os02g36140.1,Orysa4|Os04g10060.1,Orysa4|Os11g28500.1,Orysa4|Os11g28530.1,Orysa4|Os02g36264.1,Orysa4|Os02g36220.1,Orysa4|Os12g30800.1,Orysa4|Os12g30824.1,Orysa4|Os11g28490.1  
Orysa4|Os12g41950.1  
Orysa4|Os02g41800.1,Orysa4|Os04g43910.1  
Orysa4|Os07g08540.1,Orysa4|Os07g08530.1,Orysa4|Os07g08600.1  
AT4G30080,AT2G28350 Orysa4|Os06g47150.1,Orysa4|Os10g33940.1  
AT1G77850 Orysa4|Os04g59430.1  
AT5G37020 Orysa4|Os04g57610.1  
AT1G59750 Orysa4|Os02g35140.1  
AT1G19850 Orysa4|Os04g56850.1  
AT1G34170,AT1G34390,AT1G34310,AT1G35240,AT1G34410,AT1G35520,AT1G35540,AT1G43950  
Orysa4|Os02g04810.1,Orysa4|Os06g48950.1,Orysa4|Os08g40900.1  
Orysa4|Os02g46710.1  
Orysa4|Os12g29520.1,Orysa4|Os11g32110.1  
AT5G60450  
AT2G33860 Orysa4|Os01g48060.1,Orysa4|Os05g48870.1,Orysa4|Os05g43920.1,Orysa4|Os01g54990.1  
AT5G20730,AT1G19220 Orysa4|Os06g09660.1  
AT5G62000 Orysa4|Os01g70270.1  
AT1G30330 Orysa4|Os06g46410.1,Orysa4|Os02g06910.1  
AT4G23980,AT3G61830,AT2G46530 Orysa4|Os01g13520.1  
AT2G01970,AT1G14670 Orysa4|Os10g02350.1,Orysa4|Os03g13380.1  
AT5G37310  
AT5G35160 Orysa4|Os02g55440.1  
Orysa4|Os08g19160.1  
AT4G12650 Orysa4|Os02g49050.1,Orysa4|Os08g38820.1  
Orysa4|Os08g17370.1  
Orysa4|Os05g07650.1  
AT1G08350  
AT1G55130,AT3G13772 Orysa4|Os06g37160.1  
Orysa4|Os08g44150.1  
AT5G25100,AT5G10840,AT2G24170  
Orysa4|Os08g44100.1,Orysa4|Os08g44090.1,Orysa4|Os08g44140.1,Orysa4|Os09g38530.1,Orysa4|Os06g44140.1  
AT1G10950 Orysa4|Os11g07910.1,Orysa4|Os12g07670.1,Orysa4|Os02g34690.1  
AT2G21710 Orysa4|Os07g04230.1  
Orysa4|Os01g14110.1  
AT3G05800  
Orysa4|Os08g36580.1  
AT1G09250  
AT4G30180 Orysa4|Os01g43950.1  
AT3G17100,AT3G06590 Orysa4|Os07g48900.1  
AT2G37925,AT3G46900,AT2G26975,AT5G59030,AT5G59040  
Orysa4|Os01g56420.1,Orysa4|Os05g35050.1,Orysa4|Os01g56430.1,Orysa4|Os03g25470.1,Orysa4|Os04g33900.1  
AT3G07860 Orysa4|Os04g56770.1  
AT5G25340  
AT1G80060 Orysa4|Os02g09530.1  
AT4G16280  
Orysa4|Os09g03610.1  
AT2G47310  
Orysa4|Os11g32820.1

Orysa4|Os07g46820.1  
AT4G03110,AT1G03457  
Orysa4|Os01g71200.1,Orysa4|Os05g30980.1  
AT3G13800 Orysa4|Os09g19920.1  
AT5G62140 Orysa4|Os02g45460.1  
AT1G14980,AT1G23100 Orysa4|Os07g44740.1,Orysa4|Os03g25050.1  
AT1G29430,AT5G27780,AT1G29440,AT1G29510,AT1G29460,AT1G29450,AT1G29500,AT1G29490,AT1G29420  
Orysa4|Os09g37380.1,Orysa4|Os09g37490.1,Orysa4|Os03g18050.1,Orysa4|Os09g37350.1,Orysa4|Os09  
g37460.1,Orysa4|Os08g43700.1,Orysa4|Os09g37470.1,Orysa4|Os09g37400.1,Orysa4|Os09g37430.1,Orysa4|Os09g  
37410.1,Orysa4|Os09g37420.1,Orysa4|Os09g37390.1,Orysa4|Os09g37480.1,Orysa4|Os09g37500.1,Orysa4|Os09g3  
7440.1,Orysa4|Os09g37330.1  
AT1G20470,AT1G76190 Orysa4|Os07g29310.1  
AT4G25660,AT4G25680 Orysa4|Os10g38970.1  
Orysa4|Os06g01780.1  
AT5G01910 Orysa4|Os05g25620.1  
AT5G53070 Orysa4|Os05g45270.1  
AT2G19770,AT4G29340  
AT4G29350,AT2G19760,AT5G56600  
Orysa4|Os06g05880.1,Orysa4|Os10g17660.1  
AT5G14170,AT3G01890 Orysa4|Os04g31320.1  
AT5G35560  
Orysa4|Os02g53700.1  
AT2G20320 Orysa4|Os03g05200.1  
AT5G26680 Orysa4|Os05g46270.1,Orysa4|Os03g61820.1  
AT5G07250,AT1G12750,AT1G63120 Orysa4|Os08g43320.1,Orysa4|Os09g35730.1,Orysa4|Os03g02530.1  
AT1G77860  
AT4G23070 Orysa4|Os04g48130.1  
Orysa4|Os10g37760.1  
AT2G29050 Orysa4|Os11g47840.1  
AT3G53780  
AT1G52580 Orysa4|Os01g05430.1  
Orysa4|Os03g21990.1  
AT3G16650,AT4G15900  
Orysa4|Os01g04030.1  
AT3G05230,AT5G27430 Orysa4|Os09g38370.1  
AT3G01640,AT5G14470 Orysa4|Os11g11060.1  
Orysa4|Os12g35580.1  
AT2G20690  
AT5G26710 Orysa4|Os01g16520.1  
AT4G27740  
Orysa4|Os10g22410.1,Orysa4|Os03g09290.1,Orysa4|Os07g39510.1  
Orysa4|Os12g29960.1  
AT2G40110,Orysa4|Os03g49150.1  
AT3G08990  
AT4G27745  
AT5G53940  
AT3G55890,AT3G11230  
Orysa4|Os08g08110.1,Orysa4|Os04g54200.1  
AT4G28130,AT2G20900  
AT5G57000,AT1G17490,AT1G72690 Orysa4|Os09g19910.1  
AT1G70060,AT1G24190,AT1G24200  
Orysa4|Os02g42390.1  
AT1G27250  
AT1G27240 Orysa4|Os08g25200.1  
AT1G24210  
AT1G27220  
AT3G24260,AT3G28870,AT1G10250 Orysa4|Os05g51110.1  
Orysa4|Os01g01960.1,Orysa4|Os05g01020.1  
AT1G27280  
AT1G24250,AT1G23810,AT1G27270,AT1G27260,AT1G24230  
AT1G59890,AT1G10450  
AT5G15040  
AT1G24220  
AT5G15030  
AT5G15020,AT3G01320,AT1G70030,AT5G35610  
AT1G07710,AT5G60070 Orysa4|Os03g17250.1  
Orysa4|Os07g09560.1  
AT3G52830  
AT5G54700  
AT5G02620  
AT3G12360,AT3G09550 Orysa4|Os01g61990.1,Orysa4|Os03g17240.1  
AT5G54720 Orysa4|Os07g09550.1,Orysa4|Os07g09530.1  
AT1G05640,AT2G31820 Orysa4|Os09g34280.1,Orysa4|Os08g42960.1  
AT2G01680 Orysa4|Os02g50270.1  
AT2G24600,AT1G10340,AT1G34050,AT5G54710,AT5G50140  
AT1G14270 Orysa4|Os09g24670.1  
AT1G73240 Orysa4|Os02g45920.1  
AT1G19740,AT1G75460 Orysa4|Os03g29540.1,Orysa4|Os07g32560.1  
AT1G31817 Orysa4|Os01g42640.1,Orysa4|Os03g26860.1  
AT3G09090 Orysa4|Os03g61050.1  
Orysa4|Os09g12270.1  
Orysa4|Os04g36890.1

Orysa4|Os09g01650.1  
Orysa4|Os11g09800.1,Orysa4|Os09g01670.1  
AT3G12340  
AT5G05420,AT4G25340  
AT2G30395,AT1G06923 Orysa4|Os07g48140.1,Orysa4|Os05g26210.1  
AT3G18760 Orysa4|Os01g12090.1  
AT3G61670,AT2G46380 Orysa4|Os06g33320.1,Orysa4|Os02g15820.1  
AT4G01090,AT1G01440  
Orysa4|Os05g50910.1,Orysa4|Os01g43330.1  
AT3G56410  
AT4G14790 Orysa4|Os03g53500.1  
AT5G39840 Orysa4|Os04g38630.1  
AT3G46640,AT5G59570 Orysa4|Os01g74020.1  
AT4G31920,AT2G25180,AT5G49240  
Orysa4|Os06g24070.1  
AT5G58080  
Orysa4|Os01g67770.1  
AT2G01760  
AT5G62120 Orysa4|Os05g32880.1  
AT1G68210,AT4G00760  
AT2G27070,AT5G07210  
Orysa4|Os10g32600.1,Orysa4|Os05g32890.1  
AT4G18020  
Orysa4|Os02g55320.1,Orysa4|Os06g08440.1  
AT2G20570 Orysa4|Os01g13740.1  
Orysa4|Os06g43910.1,Orysa4|Os02g08500.1  
AT5G44190  
AT5G05090,AT3G10760,AT2G40970 Orysa4|Os05g34110.1  
AT4G16110,AT3G16857  
Orysa4|Os01g62660.1  
Orysa4|Os03g12350.1  
AT1G67710  
AT1G49190,AT3G62670  
AT2G05210,AT2G04395,AT5G06310 Orysa4|Os04g39280.1  
Orysa4|Os08g39360.1  
Orysa4|Os02g38260.1,Orysa4|Os04g40510.1  
AT5G17500,AT5G16700,AT3G26140,AT1G13130,AT3G26130 Orysa4|Os04g40490.1  
AT1G18060 Orysa4|Os01g03040.1  
Orysa4|Os05g02500.1  
AT3G55270  
AT5G44650 Orysa4|Os01g58470.1  
AT1G54700,AT1G51150,AT5G54745  
AT2G47940 Orysa4|Os05g05480.1  
Orysa4|Os05g34460.1  
AT5G40200 Orysa4|Os06g12780.1,Orysa4|Os02g50880.1  
AT5G36950  
AT3G16550,AT3G16540,AT1G65630,AT1G65640,AT5G40560  
AT2G26800  
Orysa4|Os01g16350.1  
Orysa4|Os12g04020.1,Orysa4|Os11g04210.1  
Orysa4|Os03g38600.1,Orysa4|Os03g38590.1  
AT1G32050 Orysa4|Os04g50890.1,Orysa4|Os02g47010.1  
Orysa4|Os08g06440.1  
AT1G61250,AT1G11180,AT2G20840,AT1G03550  
Orysa4|Os05g42330.1,Orysa4|Os01g57220.1,Orysa4|Os07g37740.1  
AT1G43850 Orysa4|Os11g10060.1  
AT5G62090,AT4G25515,AT4G25520 Orysa4|Os06g03600.1  
AT5G65880 Orysa4|Os03g47240.1  
Orysa4|Os02g03900.1  
Orysa4|Os07g15460.1,Orysa4|Os07g15370.1  
Orysa4|Os01g31870.1  
Orysa4|Os01g53210.1,Orysa4|Os03g41064.1,Orysa4|Os03g41070.1  
AT1G47240,AT4G18790,AT2G23150,AT5G67330 Orysa4|Os12g39180.1  
AT1G80830,AT1G15960 Orysa4|Os06g46310.1  
Orysa4|Os03g11010.1  
AT1G64880 Orysa4|Os02g01230.1  
AT1G32540 Orysa4|Os08g06280.1  
Orysa4|Os02g56360.1,Orysa4|Os07g28910.1  
Orysa4|Os08g03610.1  
AT4G20380 Orysa4|Os12g41700.1,Orysa4|Os03g43840.1  
AT4G21610 Orysa4|Os01g42710.1  
AT1G50500,AT1G50970 Orysa4|Os01g67880.1  
Orysa4|Os06g19730.1  
AT3G13330  
AT3G57450 Orysa4|Os03g58510.1,Orysa4|Os07g08830.1,Orysa4|Os10g28170.1  
AT3G09940,AT5G03630  
AT3G52880 Orysa4|Os08g44340.1,Orysa4|Os09g39380.1  
AT3G27820 Orysa4|Os02g47790.1  
AT1G63940 Orysa4|Os08g05570.1  
AT4G20040  
AT4G20050 Orysa4|Os04g52320.1  
AT5G54950,AT4G26970,AT2G05710,AT4G35830 Orysa4|Os08g09200.1

Orysa4|Os06g19960.1  
Orysa4|Os12g20150.1  
AT5G26570  
AT4G16970 Orysa4|Os10g41390.1  
AT4G32090 Orysa4|Os11g32070.1,Orysa4|Os11g32080.1,Orysa4|Os02g30780.1  
AT4G25550 Orysa4|Os04g58640.1  
AT4G29820  
AT2G38140 Orysa4|Os05g09400.1  
Orysa4|Os01g42270.1  
AT4G32551 Orysa4|Os01g08190.1  
AT2G32700 Orysa4|Os02g56880.1  
AT3G60110,AT2G44430,AT3G57980,AT2G42150 Orysa4|Os09g31454.1,Orysa4|Os08g39980.1  
AT1G61215 Orysa4|Os07g37800.1  
AT1G20200,AT1G75990 Orysa4|Os09g37000.1  
Orysa4|Os06g36760.1  
AT4G10790 Orysa4|Os10g37630.1  
AT4G29930,AT5G57150 Orysa4|Os04g23440.1,Orysa4|Os04g23550.1  
AT3G57280 Orysa4|Os04g39450.1,Orysa4|Os06g19690.1  
AT1G03330 Orysa4|Os08g05850.1  
Orysa4|Os01g16020.1  
AT1G74470  
Orysa4|Os02g51080.1  
AT1G26640 Orysa4|Os01g55890.1  
AT3G62080 Orysa4|Os12g01810.1,Orysa4|Os01g18280.1  
AT5G63000 Orysa4|Os01g16510.1  
Orysa4|Os04g59300.1  
AT3G57030,AT2G41290 Orysa4|Os11g04650.1,Orysa4|Os12g04424.1,Orysa4|Os11g04660.1  
AT1G08470,AT5G22020 Orysa4|Os03g53950.1  
AT3G57020,AT3G57010,AT2G41300  
AT1G74000,AT1G74020,AT1G74010  
Orysa4|Os09g20720.1  
Orysa4|Os07g42250.1  
Orysa4|Os09g20684.1  
Orysa4|Os06g41820.1,Orysa4|Os06g41850.1,Orysa4|Os07g36060.1,Orysa4|Os07g35970.1,Orysa4|Os07g35990.1,Orysa4|Os07g36040.1,Orysa4|Os01g50330.1,Orysa4|Os08g07810.1,Orysa4|Os08g34330.1  
Orysa4|Os09g20810.1  
AT3G59530  
Orysa4|Os06g35950.1  
AT1G80100  
AT5G19710  
Orysa4|Os09g39400.1,Orysa4|Os08g44350.1  
AT3G29350,AT5G39340,AT4G04402,AT1G03430,AT3G21510  
AT3G16360 Orysa4|Os05g44570.1,Orysa4|Os01g54050.1,Orysa4|Os05g09410.1  
AT1G15290  
AT1G01320  
Orysa4|Os02g15660.1  
Orysa4|Os04g55230.1  
AT4G28080  
AT3G52140 Orysa4|Os02g48620.1  
Orysa4|Os07g23990.1  
Orysa4|Os03g44110.1,Orysa4|Os03g44140.1,Orysa4|Os03g44100.1,Orysa4|Os04g14304.1  
AT1G30300 Orysa4|Os12g42110.1,Orysa4|Os12g42100.1  
AT4G03610  
AT5G15400 Orysa4|Os12g36710.1,Orysa4|Os03g31400.1  
AT5G57980  
Orysa4|Os04g41040.1  
AT3G22320 Orysa4|Os01g59140.1  
AT3G57080,AT2G41340,AT3G54490 Orysa4|Os12g04510.1,Orysa4|Os11g04730.1  
AT3G16680  
AT5G54855 Orysa4|Os02g21280.1  
AT1G29580,AT1G55080 Orysa4|Os01g31629.1  
Orysa4|Os10g10434.1  
AT2G47420,AT1G64560 Orysa4|Os08g08270.1  
AT5G66360  
Orysa4|Os07g32550.1  
AT1G14680,AT4G09060 Orysa4|Os02g58470.1  
Orysa4|Os03g39820.1  
AT5G55640 Orysa4|Os03g29910.1  
AT2G28520 Orysa4|Os01g61780.1  
AT2G21410,AT4G39080 Orysa4|Os03g14690.1,Orysa4|Os10g10500.1  
AT1G71430 Orysa4|Os01g43060.1  
AT4G39160 Orysa4|Os03g62388.1  
Orysa4|Os03g62379.1  
AT4G38495 Orysa4|Os04g20590.1  
AT5G06260,AT4G34070 Orysa4|Os12g06100.1  
AT1G73570,AT1G18260 Orysa4|Os03g15350.1  
AT1G77470 Orysa4|Os02g53500.1  
AT3G12050 Orysa4|Os08g36150.1  
AT2G13720  
AT3G23890 Orysa4|Os01g13310.1,Orysa4|Os02g47150.1  
AT4G24900 Orysa4|Os09g32940.1  
Orysa4|Os01g64880.1



Orysa4|Os07g12900.1  
AT4G30120,AT2G19110,AT4G30110  
Orysa4|Os01g26100.1,Orysa4|Os06g48720.1  
AT1G79190 Orysa4|Os10g42510.1  
AT2G31970 Orysa4|Os02g29464.1  
Orysa4|Os05g08610.1,Orysa4|Os01g08340.1,Orysa4|Os02g54624.1  
AT4G32600  
AT1G80400  
Orysa4|Os09g15430.1  
AT5G49150 Orysa4|Os09g25650.1  
AT1G63660 Orysa4|Os08g23730.1  
AT3G53180 Orysa4|Os10g31820.1  
AT3G11470Orysa4|Os08g14490.1  
AT2G43720  
AT1G05730,AT2G31725,AT1G05740 Orysa4|Os11g14990.1  
AT4G28260 Orysa4|Os10g35710.1  
AT3G02820 Orysa4|Os02g52460.1  
AT4G08790 Orysa4|Os12g31830.1  
AT5G58410 Orysa4|Os01g74610.1  
AT2G05830 Orysa4|Os11g11050.1  
AT5G52510 Orysa4|Os02g45760.1,Orysa4|Os04g49110.1  
AT3G13840 Orysa4|Os08g36230.1,Orysa4|Os03g29480.1  
Orysa4|Os04g35250.1  
AT3G50650,AT5G66770 Orysa4|Os03g51330.1  
AT4G37650 Orysa4|Os03g31880.1,Orysa4|Os07g39820.1  
AT1G21450 Orysa4|Os01g65900.1  
Orysa4|Os07g39470.1  
AT1G50420 Orysa4|Os06g10900.1,Orysa4|Os01g71970.1  
Orysa4|Os12g06540.1  
AT1G66350,AT1G14920,AT2G01570,AT5G17490,AT3G03450 Orysa4|Os03g49990.1  
AT1G63100  
Orysa4|Os05g42130.1  
AT4G17230 Orysa4|Os03g09280.1,Orysa4|Os10g22430.1  
Orysa4|Os11g47890.1,Orysa4|Os11g47870.1,Orysa4|Os11g47900.1,Orysa4|Os12g38490.1,Orysa4|Os11  
g04400.1,Orysa4|Os11g47910.1  
AT3G54220 Orysa4|Os12g02870.1,Orysa4|Os11g03110.1  
Orysa4|Os01g62460.1  
AT1G55580 Orysa4|Os02g10360.1,Orysa4|Os06g40780.1  
Orysa4|Os07g36170.1  
Orysa4|Os12g05060.1  
Orysa4|Os04g50060.1  
AT2G29060,AT1G07530,AT1G07520,AT3G46600,AT5G59450  
Orysa4|Os03g37900.1,Orysa4|Os06g03710.1,Orysa4|Os07g16330.1  
Orysa4|Os08g04610.1  
Orysa4|Os05g40710.1  
Orysa4|Os11g04570.1,Orysa4|Os12g04370.1,Orysa4|Os11g04590.1,Orysa4|Os12g04380.1  
AT2G37650 Orysa4|Os03g48450.1  
Orysa4|Os07g38030.1  
Orysa4|Os01g67670.1,Orysa4|Os01g67650.1  
Orysa4|Os05g49930.1,Orysa4|Os01g45860.1  
AT4G08250 Orysa4|Os03g15680.1  
Orysa4|Os05g31420.1  
AT5G67411,AT3G49950 Orysa4|Os07g40020.1  
AT5G48150,AT1G50600,AT2G04890  
Orysa4|Os03g40080.1  
Orysa4|Os08g34040.1,Orysa4|Os05g31390.1  
Orysa4|Os11g31100.1  
AT5G41920  
Orysa4|Os11g06180.1  
Orysa4|Os01g43100.1  
AT4G27800 Orysa4|Os01g37130.1  
Orysa4|Os06g33530.1,Orysa4|Os06g33549.1  
Orysa4|Os02g38690.1,Orysa4|Os02g38710.1,Orysa4|Os04g42260.1,Orysa4|Os02g39480.1  
AT3G23360  
Orysa4|Os06g48300.1,Orysa4|Os02g05630.1  
Orysa4|Os12g09640.1,Orysa4|Os11g13820.1  
Orysa4|Os02g33120.1,Orysa4|Os07g33230.1  
AT3G63340  
Orysa4|Os06g08140.1,Orysa4|Os02g55560.1  
AT2G40860  
AT5G53140 Orysa4|Os05g50970.1  
Orysa4|Os02g15594.1  
AT1G43900  
AT4G28400,AT2G20630,AT3G15260  
AT2G33700  
AT3G62260 Orysa4|Os01g19130.1,Orysa4|Os05g04360.1  
AT2G34740  
AT1G48040,AT3G17250  
AT2G25620 Orysa4|Os06g39600.1  
Orysa4|Os09g38550.1  
AT3G27140,AT4G08260,AT2G30020,AT1G07160,AT2G40180 Orysa4|Os03g18150.1  
Orysa4|Os01g52810.1,Orysa4|Os02g39410.1

AT1G34750,AT1G22280,AT1G78200  
AT5G24940,AT5G10740  
AT4G31750 Orysa4|Os04g56450.1  
AT3G51470 Orysa4|Os10g39540.1  
AT1G18030 Orysa4|Os09g14540.1  
AT1G67820  
Orysa4|Os04g52000.1  
AT4G12240  
AT5G52010 Orysa4|Os06g07020.1  
AT1G28070,AT2G33510 Orysa4|Os02g31140.1  
AT5G55920,AT4G26600 Orysa4|Os02g49270.1,Orysa4|Os09g37860.1  
AT4G17000 Orysa4|Os03g56070.1  
AT5G14240 Orysa4|Os01g08960.1  
AT5G54760,AT4G27130,AT1G54290,AT5G54940 Orysa4|Os01g58220.1,Orysa4|Os05g41900.1  
Orysa4|Os03g07840.1  
AT3G57610 Orysa4|Os03g49220.1  
AT5G62440 Orysa4|Os03g08810.1  
AT3G48540 Orysa4|Os01g55974.1  
AT2G21970 Orysa4|Os04g54630.1  
AT1G08220 Orysa4|Os05g08410.1  
AT1G33780 Orysa4|Os05g34720.1,Orysa4|Os01g66280.1  
AT3G29240 Orysa4|Os10g18370.1  
AT2G04750,AT5G35700 Orysa4|Os02g37580.1,Orysa4|Os02g48740.1  
AT5G48460 Orysa4|Os01g33080.1  
AT5G55400,AT4G26700  
AT1G75000,AT4G36830 Orysa4|Os12g43890.1  
AT5G13430,AT5G13440 Orysa4|Os04g32660.1,Orysa4|Os02g32120.1  
AT3G27925 Orysa4|Os05g49380.1  
AT4G18370  
AT5G39830 Orysa4|Os04g38640.1  
Orysa4|Os12g42210.1  
AT2G32730,AT1G04810 Orysa4|Os04g51910.1,Orysa4|Os08g12820.1  
AT3G56460 Orysa4|Os05g24880.1  
AT1G80410 Orysa4|Os01g43030.1  
Orysa4|Os07g07180.1  
AT5G12900 Orysa4|Os09g31370.1,Orysa4|Os08g39740.1  
AT1G03250 Orysa4|Os11g04990.1,Orysa4|Os12g05000.1  
Orysa4|Os12g14930.1  
AT3G25100 Orysa4|Os12g03130.1,Orysa4|Os11g03430.1  
AT4G03180 Orysa4|Os12g35270.1  
AT1G29965,AT2G34480,AT3G14600 Orysa4|Os01g47660.1,Orysa4|Os05g49030.1,Orysa4|Os01g54870.1  
AT1G08100,AT1G08090,AT5G60770 Orysa4|Os02g02190.1  
AT5G14570 Orysa4|Os01g36720.1  
AT3G45060,AT5G60780  
AT1G12940 Orysa4|Os01g50820.1  
AT3G47810 Orysa4|Os02g16550.1  
AT5G35100 Orysa4|Os08g19610.1  
AT3G07670 Orysa4|Os02g49326.1  
AT5G21060 Orysa4|Os12g03190.1,Orysa4|Os11g03470.1  
AT1G31230,AT4G19710 Orysa4|Os09g12290.1,Orysa4|Os08g25390.1,Orysa4|Os09g21490.1  
AT4G38250,AT2G42005,AT5G65990 Orysa4|Os02g44980.1,Orysa4|Os04g47780.1  
AT3G11900 Orysa4|Os07g12770.1  
AT4G27860,AT4G27870,AT5G24290 Orysa4|Os06g01440.1  
AT3G14430 Orysa4|Os08g41680.1  
AT3G17465 Orysa4|Os01g14830.1  
AT4G15890 Orysa4|Os12g36170.1  
Orysa4|Os02g39200.1,Orysa4|Os04g41320.1  
Orysa4|Os01g67330.1  
AT2G43240,AT3G59360  
AT5G04500 Orysa4|Os03g48010.1  
Orysa4|Os05g46260.1  
AT2G33855 Orysa4|Os04g39950.1  
AT3G07890 Orysa4|Os08g25010.1  
AT1G62855  
AT1G62850 Orysa4|Os03g14510.1  
AT2G42330,AT1G17070 Orysa4|Os12g42140.1  
AT3G60800 Orysa4|Os03g58960.1  
AT4G00840 Orysa4|Os07g28460.1  
AT4G22750  
AT4G09650 Orysa4|Os02g51470.1  
Orysa4|Os03g52660.1  
AT3G03320 Orysa4|Os11g16420.1  
AT2G43470  
AT3G14760 Orysa4|Os02g21530.1,Orysa4|Os02g21640.1  
AT5G22080 Orysa4|Os03g15480.1  
AT1G49950 Orysa4|Os12g41920.1  
AT3G49850,AT5G67580  
Orysa4|Os01g40670.1  
Orysa4|Os01g51154.1  
AT1G72740,AT1G17520,AT1G54260  
AT4G31300 Orysa4|Os06g04800.1,Orysa4|Os02g53060.1  
AT3G17580,AT1G48330 Orysa4|Os05g04680.1,Orysa4|Os01g18450.1

AT1G61040 Orysa4|Os12g35030.1  
AT2G25100 Orysa4|Os11g05570.1  
AT2G43360 Orysa4|Os08g42730.1  
Orysa4|Os02g09840.1  
AT1G03960,AT5G44090  
AT5G28900,AT5G28850,AT1G54450 Orysa4|Os10g33680.1  
AT2G30790,AT1G06680 Orysa4|Os07g04840.1  
AT1G20580,AT1G76300  
Orysa4|Os03g13760.1,Orysa4|Os02g01250.1  
Orysa4|Os07g36150.1,Orysa4|Os04g01070.1  
Orysa4|Os09g34180.1  
AT3G07540,AT5G48360  
Orysa4|Os08g33430.1  
AT1G24150,AT1G70140,AT1G59910 Orysa4|Os02g50570.1  
AT2G43800,AT3G25500 Orysa4|Os01g67240.1  
AT3G05470 Orysa4|Os04g38810.1  
AT5G54650,AT4G15200 Orysa4|Os02g06580.1  
Orysa4|Os03g10680.1,Orysa4|Os10g20710.1,Orysa4|Os07g39920.1  
AT5G67470  
Orysa4|Os07g13500.1  
Orysa4|Os01g41980.1  
AT5G26740,AT3G05940 Orysa4|Os03g61210.1,Orysa4|Os07g14090.1  
AT5G52560 Orysa4|Os06g48760.1  
AT3G11510,AT2G36160,AT3G52580  
Orysa4|Os02g33140.1,Orysa4|Os04g33750.1,Orysa4|Os02g06700.1  
Orysa4|Os02g01540.1  
AT5G23300 Orysa4|Os04g57950.1  
Orysa4|Os12g07740.1,Orysa4|Os12g41400.1  
AT4G18330,AT2G18720  
AT1G04170  
AT5G20170 Orysa4|Os12g44140.1  
AT3G53870,AT2G31610,AT5G35530  
Orysa4|Os07g41750.1,Orysa4|Os03g38000.1  
AT5G39490,AT5G39480,AT5G39460,AT5G39450,AT5G39470 Orysa4|Os08g01430.1  
AT3G44820  
AT4G31820 Orysa4|Os06g08550.1,Orysa4|Os09g25330.1  
AT1G50280,AT3G19850 Orysa4|Os04g57800.1  
AT3G03510,AT5G17580  
AT5G64330 Orysa4|Os02g35970.1  
AT3G49900  
AT3G49970,AT5G67385  
Orysa4|Os09g29350.1  
AT5G48130 Orysa4|Os07g39530.1  
Orysa4|Os08g21650.1  
Orysa4|Os03g10880.1  
AT1G03010,AT2G47860 Orysa4|Os03g22600.1  
Orysa4|Os12g31320.1  
Orysa4|Os07g39850.1  
AT2G30520 Orysa4|Os11g02610.1,Orysa4|Os12g02530.1,Orysa4|Os05g11190.1  
AT5G48800  
AT5G10250  
AT3G22104 Orysa4|Os07g36230.1  
AT3G08660,AT3G08570 Orysa4|Os12g02540.1,Orysa4|Os11g02620.1  
Orysa4|Os06g11900.1,Orysa4|Os12g09830.1,Orysa4|Os08g23420.1  
AT3G15570,AT1G52770 Orysa4|Os01g08130.1,Orysa4|Os05g08530.1  
AT5G03250,AT5G13600 Orysa4|Os01g57230.1  
AT3G50840,AT5G66560 Orysa4|Os03g55830.1  
AT1G30440 Orysa4|Os12g41910.1,Orysa4|Os03g43990.1  
Orysa4|Os07g44580.1  
Orysa4|Os07g44570.1  
AT1G67900,AT3G26490,AT5G47800 Orysa4|Os04g40100.1,Orysa4|Os02g38120.1  
AT2G14820,AT2G23050,AT4G37590,AT5G67440  
Orysa4|Os12g39380.1,Orysa4|Os03g41350.1,Orysa4|Os03g10800.1  
AT1G71696 Orysa4|Os06g05240.1  
AT1G15380,AT1G80160 Orysa4|Os01g07850.1,Orysa4|Os05g07940.1  
AT2G28420 Orysa4|Os07g46360.1  
AT2G27170 Orysa4|Os02g04060.1  
Orysa4|Os02g04080.1,Orysa4|Os02g04050.1  
AT3G07400 Orysa4|Os02g28040.1  
Orysa4|Os03g63430.1  
AT5G64760,AT5G09900  
AT4G06536  
AT4G06534 Orysa4|Os02g40110.1  
AT2G47390 Orysa4|Os07g48970.1  
Orysa4|Os07g43460.1  
Orysa4|Os06g22490.1  
AT1G69640,AT1G14290 Orysa4|Os02g51150.1,Orysa4|Os06g12250.1  
AT3G01720 Orysa4|Os01g67750.1  
AT5G25230,AT1G06220 Orysa4|Os06g40600.1  
Orysa4|Os02g32030.1,Orysa4|Os04g02820.1,Orysa4|Os01g53900.1  
AT3G22980 Orysa4|Os03g44780.1,Orysa4|Os02g33850.1

AT1G56070  
AT2G31955 Orysa4|Os02g15870.1,Orysa4|Os12g32230.1  
Orysa4|Os07g37610.1  
AT4G21550  
AT4G32010,AT2G30470 Orysa4|Os07g48200.1  
AT4G34270 Orysa4|Os03g55270.1  
AT4G10130 Orysa4|Os08g36980.1  
Orysa4|Os03g01030.1  
AT5G51110  
AT1G29810 Orysa4|Os01g47420.1  
Orysa4|Os04g27830.1  
AT4G14716,AT4G14710,AT2G26400 Orysa4|Os10g28350.1,Orysa4|Os03g06620.1  
AT5G43850  
AT3G60720 Orysa4|Os02g43000.1  
AT2G33330,AT1G04520,AT5G43980,AT3G04370 Orysa4|Os06g14280.1,Orysa4|Os02g50200.1  
AT1G12400 Orysa4|Os05g10980.1  
AT5G28960,AT5G28910 Orysa4|Os02g56500.1  
AT4G37280 Orysa4|Os04g01130.1,Orysa4|Os11g34300.1  
AT1G02740  
AT5G15750 Orysa4|Os04g56670.1  
AT5G30510 Orysa4|Os03g20100.1  
AT2G28660  
Orysa4|Os08g31340.1  
AT3G24450 Orysa4|Os01g52160.1,Orysa4|Os05g45820.1  
Orysa4|Os01g74490.1  
AT3G53530,AT2G37390 Orysa4|Os03g60480.1  
Orysa4|Os01g41200.1  
AT5G02600  
Orysa4|Os01g25520.1  
AT2G15620 Orysa4|Os02g52730.1,Orysa4|Os01g25484.1  
Orysa4|Os01g15450.1  
AT4G24730 Orysa4|Os07g48840.1  
AT1G34320  
Orysa4|Os05g35530.1,Orysa4|Os01g65330.1  
AT1G30755 Orysa4|Os06g50220.1  
Orysa4|Os10g27090.1,Orysa4|Os11g07840.1  
AT5G08660  
Orysa4|Os02g34650.1  
Orysa4|Os04g35410.1  
AT3G52570  
Orysa4|Os01g64262.1  
AT5G50330,AT4G24810 Orysa4|Os01g67720.1  
AT5G24130 Orysa4|Os02g15740.1  
AT1G65230 Orysa4|Os01g68450.1  
AT1G68010 Orysa4|Os02g01150.1  
AT5G02160  
Orysa4|Os05g01950.1  
AT3G09570,AT5G18520,AT5G02630 Orysa4|Os05g38720.1,Orysa4|Os01g61970.1,Orysa4|Os01g61960.1  
Orysa4|Os02g40550.1,Orysa4|Os04g42960.1  
AT5G42090 Orysa4|Os06g04130.1  
Orysa4|Os06g12020.1,Orysa4|Os02g51500.1  
AT1G22050,AT1G77870  
AT3G26980,AT4G24990 Orysa4|Os04g32270.1  
AT3G01050,AT5G15460  
AT1G69840 Orysa4|Os08g30790.1  
AT3G01290 Orysa4|Os10g32700.1  
AT5G62740  
Orysa4|Os01g40580.1  
Orysa4|Os05g51420.1  
AT5G51570 Orysa4|Os06g04460.1  
Orysa4|Os01g40560.1  
AT1G76260,AT1G20540 Orysa4|Os08g44010.1  
Orysa4|Os07g31620.1  
Orysa4|Os06g20280.1  
Orysa4|Os12g12500.1,Orysa4|Os05g43630.1,Orysa4|Os01g27580.1,Orysa4|Os06g50290.1,Orysa4|Os03  
g27540.1,Orysa4|Os05g23330.1,Orysa4|Os11g14150.1,Orysa4|Os02g33480.1,Orysa4|Os06g36859.1,Orysa4|Os09g  
18430.1,Orysa4|Os06g21507.1,Orysa4|Os06g21498.1,Orysa4|Os10g41350.1,Orysa4|Os01g60580.1,Orysa4|Os10g3  
1130.1,Orysa4|Os01g34400.1,Orysa4|Os02g54430.1,Orysa4|Os08g15520.1,Orysa4|Os01g65240.1,Orysa4|Os07g36  
260.1,Orysa4|Os06g34370.1,Orysa4|Os07g38770.1,Orysa4|Os11g31520.1,Orysa4|Os09g25670.1,Orysa4|Os08g129  
40.1,Orysa4|Os04g21870.1,Orysa4|Os02g26750.1,Orysa4|Os12g36410.1,Orysa4|Os10g27010.1,Orysa4|Os11g2829  
0.1,Orysa4|Os04g47760.1  
Orysa4|Os09g08510.1,Orysa4|Os01g36710.1,Orysa4|Os07g10750.1,Orysa4|Os05g32740.1,Orysa4|Os01  
g08500.1,Orysa4|Os08g40480.1,Orysa4|Os09g14650.1,Orysa4|Os12g35900.1,Orysa4|Os12g07170.1,Orysa4|Os07g  
36850.1,Orysa4|Os08g22230.1,Orysa4|Os09g18240.1,Orysa4|Os03g31940.1  
Orysa4|Os02g20770.1  
AT1G43590 Orysa4|Os01g11320.1  
Orysa4|Os10g41810.1  
Orysa4|Os04g47500.1,Orysa4|Os04g34810.1,Orysa4|Os07g12880.1,Orysa4|Os02g45400.1,Orysa4|Os07  
g27660.1,Orysa4|Os02g28420.1  
Orysa4|Os01g74560.1,Orysa4|Os01g15700.1,Orysa4|Os08g37850.1,Orysa4|Os08g17860.1  
Orysa4|Os06g42870.1  
Orysa4|Os06g44990.1,Orysa4|Os06g02720.1

Orysa4|Os11g24470.1  
AT2G13770,AT1G24370,AT3G30190  
Orysa4|Os02g23950.1,Orysa4|Os01g27920.1  
AT2G07520 Orysa4|Os11g19530.1,Orysa4|Os03g37350.1  
AT3G15310,AT5G32621,AT5G34838,AT2G14730,AT2G10980 Orysa4|Os09g14250.1  
AT3G07430,AT4G27990  
Orysa4|Os07g08770.1  
AT2G30330 Orysa4|Os12g02070.1,Orysa4|Os11g02110.1,Orysa4|Os12g22760.1  
AT1G33980 Orysa4|Os04g35920.1  
AT1G34040,AT1G34060 Orysa4|Os01g51980.1,Orysa4|Os01g52010.1  
AT1G23320,AT1G70560,AT4G24670 Orysa4|Os05g07720.1,Orysa4|Os01g07500.1  
AT3G17950 Orysa4|Os02g50050.1,Orysa4|Os06g14530.1  
Orysa4|Os10g21670.1,Orysa4|Os10g21790.1  
AT4G39730,AT2G22170,AT5G65158  
Orysa4|Os04g38370.1,Orysa4|Os04g38360.1,Orysa4|Os04g38390.1,Orysa4|Os06g11810.1,Orysa4|Os02g51710.1  
AT5G62290 Orysa4|Os03g14520.1,Orysa4|Os10g08879.1  
AT4G17620 Orysa4|Os05g32580.1  
AT2G46060 Orysa4|Os10g30910.1  
AT1G53345 Orysa4|Os02g45950.1  
AT5G09580 Orysa4|Os11g06670.1  
AT4G15770 Orysa4|Os07g47420.1  
AT2G26210 Orysa4|Os07g42640.1  
AT4G32060 Orysa4|Os04g42430.1,Orysa4|Os02g39950.1  
AT3G11700,AT5G06390,AT3G52370,AT2G35860,AT5G05650  
Orysa4|Os03g57490.1,Orysa4|Os03g57460.1,Orysa4|Os07g06680.1  
Orysa4|Os01g42120.1  
AT1G14990  
AT1G52080 Orysa4|Os05g09380.1  
AT2G36650 Orysa4|Os01g39890.1  
AT3G18480 Orysa4|Os03g50300.1  
AT2G21385 Orysa4|Os09g36130.1  
AT4G01560 Orysa4|Os06g04600.1  
AT3G49470,AT1G33040,AT4G10480 Orysa4|Os07g22450.1,Orysa4|Os01g50360.1,Orysa4|Os03g02960.1  
Orysa4|Os01g71230.1  
AT5G13850,AT3G12390  
Orysa4|Os05g38210.1  
AT1G80720,AT1G15870,AT4G31930 Orysa4|Os09g38500.1,Orysa4|Os08g34130.1  
AT5G02050  
Orysa4|Os06g22070.1  
AT2G46505  
AT2G39795,AT3G55605,AT2G46190,AT2G39790,AT5G05990  
Orysa4|Os01g05050.1,Orysa4|Os01g05010.1,Orysa4|Os01g05060.1  
AT1G58983,AT1G58684,AT1G59359,AT1G58380,AT2G41840,AT3G57490  
Orysa4|Os03g59310.1,Orysa4|Os07g10660.1  
AT3G17611 Orysa4|Os01g18100.1  
AT1G21410,AT1G77000 Orysa4|Os05g35110.1  
AT3G51830  
Orysa4|Os03g18080.1  
AT5G66020,AT3G51460 Orysa4|Os11g20384.1,Orysa4|Os02g34884.1  
Orysa4|Os02g45870.1  
AT1G14530,AT2G02180 Orysa4|Os03g02850.1,Orysa4|Os10g39220.1  
AT4G21790 Orysa4|Os07g01250.1,Orysa4|Os03g36790.1  
AT1G32160 Orysa4|Os04g50860.1  
AT5G48590,AT3G07310 Orysa4|Os11g26890.1  
AT1G48450,AT3G17800 Orysa4|Os03g50870.1  
AT3G04830,AT5G28220 Orysa4|Os02g03470.1  
AT1G60550 Orysa4|Os01g47350.1  
AT5G04250  
AT2G39320  
Orysa4|Os03g39230.1,Orysa4|Os03g64219.1  
AT5G03330 Orysa4|Os02g57410.1  
AT3G22260 Orysa4|Os06g45850.1  
AT3G02070 Orysa4|Os04g32970.1  
Orysa4|Os02g10850.1  
Orysa4|Os06g44500.1  
AT3G61350 Orysa4|Os02g02350.1  
AT2G24540  
AT1G30090 Orysa4|Os07g05880.1  
AT1G55270 Orysa4|Os03g07160.1,Orysa4|Os10g26990.1  
AT1G16250  
Orysa4|Os03g40700.1  
AT2G29900  
AT1G08700 Orysa4|Os01g16930.1  
AT5G56550 Orysa4|Os02g45930.1,Orysa4|Os04g49370.1  
AT5G05720,AT4G19610  
Orysa4|Os04g52200.1  
AT3G54460 Orysa4|Os01g72310.1  
AT1G16770 Orysa4|Os02g04780.1  
AT3G06450  
Orysa4|Os12g37840.1  
AT1G74810,AT1G15460,AT5G25430,AT4G32510 Orysa4|Os01g08020.1

AT2G47160,AT3G62270  
Orysa4|Os01g64650.1  
AT5G58060,AT5G58180 Orysa4|Os01g73300.1  
AT5G59560 Orysa4|Os05g02690.1  
AT2G38640 Orysa4|Os11g02750.1,Orysa4|Os12g02720.1,Orysa4|Os05g40630.1,Orysa4|Os05g24650.1  
Orysa4|Os11g02800.1,Orysa4|Os12g02760.1  
AT5G41590  
AT1G80120,AT3G15810 Orysa4|Os05g43460.1,Orysa4|Os01g56450.1  
AT2G11000Orysa4|Os02g55950.1  
Orysa4|Os01g54670.1  
AT5G11500Orysa4|Os05g13440.1  
AT3G14740 Orysa4|Os08g19374.1,Orysa4|Os01g08820.1  
AT2G33540 Orysa4|Os11g31890.1  
AT5G55710 Orysa4|Os02g49470.1  
AT2G47840  
AT5G58730 Orysa4|Os03g52760.1  
AT5G08180 Orysa4|Os06g16290.1  
AT1G29950 Orysa4|Os02g21090.1,Orysa4|Os03g39432.1,Orysa4|Os03g35350.1,Orysa4|Os01g43680.1  
AT4G14270,AT2G41430 Orysa4|Os07g46670.1,Orysa4|Os03g23010.1  
Orysa4|Os04g16780.1  
AT2G21720 Orysa4|Os03g06180.1  
AT5G23390 Orysa4|Os04g58100.1,Orysa4|Os02g42530.1  
AT1G71240 Orysa4|Os01g64870.1  
AT1G48840,AT3G18350 Orysa4|Os05g17990.1,Orysa4|Os10g03830.1  
AT4G37920  
Orysa4|Os08g23160.1  
AT1G36320  
Orysa4|Os02g18940.1  
AT4G38130  
AT5G35600  
AT3G44660,AT3G44490 Orysa4|Os03g35880.1  
AT3G44680  
Orysa4|Os01g12310.1  
Orysa4|Os02g12350.1,Orysa4|Os02g12380.1,Orysa4|Os06g38470.1  
AT5G63110Orysa4|Os08g25570.1  
Orysa4|Os04g33480.1  
Orysa4|Os11g09370.1,Orysa4|Os11g09440.1,Orysa4|Os01g40350.1,Orysa4|Os01g40400.1  
AT1G26470 Orysa4|Os05g43680.1  
Orysa4|Os02g42310.1  
AT5G08260  
AT5G22960  
Orysa4|Os06g13410.1,Orysa4|Os07g46350.1,Orysa4|Os03g09190.1  
AT3G07990,AT2G35780 Orysa4|Os01g06490.1  
Orysa4|Os04g44410.1  
AT3G02110  
Orysa4|Os10g39560.1  
AT5G23210  
AT2G12480,AT5G42240,AT5G42230,AT1G43780  
AT3G25420,AT4G12910  
Orysa4|Os06g51370.1  
AT3G10410 Orysa4|Os07g29620.1,Orysa4|Os02g02320.1  
Orysa4|Os04g25560.1  
AT4G15100,AT1G11080,AT1G61130  
Orysa4|Os12g15470.1  
AT3G56540,AT3G52020,AT3G52010,AT3G52000,AT2G05850,AT3G63470  
Orysa4|Os03g26920.1,Orysa4|Os03g26930.1,Orysa4|Os09g28830.1,Orysa4|Os09g28840.1  
Orysa4|Os11g24290.1  
AT1G15000  
Orysa4|Os01g11670.1,Orysa4|Os05g50600.1,Orysa4|Os06g36570.1,Orysa4|Os05g50570.1,Orysa4|Os05  
g50580.1,Orysa4|Os01g43890.1  
AT4G30610,AT2G24000,AT2G24010 Orysa4|Os02g55130.1  
AT4G30810 Orysa4|Os06g08720.1  
Orysa4|Os11g24200.1  
Orysa4|Os02g26480.1  
AT2G33530,AT1G28110 Orysa4|Os04g32540.1,Orysa4|Os11g31980.1  
Orysa4|Os11g10750.1  
AT2G35770  
AT3G17180 Orysa4|Os05g06660.1,Orysa4|Os01g22954.1,Orysa4|Os01g22980.1  
AT3G45010,AT5G22980  
AT2G36070,AT2G20510 Orysa4|Os07g22700.1  
AT3G50520 Orysa4|Os11g04320.1,Orysa4|Os12g04120.1,Orysa4|Os08g37140.1  
AT5G04120  
Orysa4|Os03g63010.1,Orysa4|Os04g57320.1  
AT4G22260  
AT4G37445 Orysa4|Os02g03430.1  
AT2G44040,AT3G59890 Orysa4|Os03g14120.1  
Orysa4|Os02g24020.1  
AT1G80770 Orysa4|Os08g06230.1  
AT1G63970 Orysa4|Os02g45660.1  
AT3G06140,AT5G19080 Orysa4|Os05g33000.1  
Orysa4|Os01g27720.1  
AT5G03200,AT3G09770,AT3G53410

Orysa4|Os03g15000.1,Orysa4|Os10g13670.1  
AT5G64250 Orysa4|Os08g37874.1  
AT3G06290 Orysa4|Os07g45160.1  
AT3G54380 Orysa4|Os03g22870.1  
Orysa4|Os06g01180.1  
AT1G08125 Orysa4|Os02g57330.1  
AT5G44170 Orysa4|Os05g48950.1  
AT1G06510 Orysa4|Os01g50120.1  
AT3G19160,AT1G68460,AT4G24650,AT1G25410 Orysa4|Os07g09220.1,Orysa4|Os01g49390.1  
AT5G19040,AT3G23630  
AT3G63110,Orysa4|Os03g24440.1,Orysa4|Os03g24240.1,Orysa4|Os05g24660.1,Orysa4|Os03g59570.1  
AT2G27760 Orysa4|Os01g73760.1  
AT5G15790,AT3G02290,AT5G38895 Orysa4|Os01g70160.1  
Orysa4|Os11g41140.1  
AT5G41350,AT4G00335 Orysa4|Os11g18947.1,Orysa4|Os10g05230.1  
AT4G23450  
AT5G05910 Orysa4|Os03g40170.1  
AT1G47870 Orysa4|Os04g02140.1  
AT2G36010,AT5G22220 Orysa4|Os04g33950.1,Orysa4|Os02g33430.1,Orysa4|Os12g06200.1  
AT5G45090,AT1G33920,AT4G19850,AT4G19840 Orysa4|Os01g06500.1  
AT5G08560 Orysa4|Os02g19210.1  
AT5G43920 Orysa4|Os10g32770.1  
AT1G16650 Orysa4|Os12g41670.1  
AT3G59310,AT3G59340,AT3G59330,AT3G59320  
Orysa4|Os08g42720.1,Orysa4|Os09g33830.1,Orysa4|Os05g37220.1,Orysa4|Os05g23460.1,Orysa4|Os05g23440.1  
Orysa4|Os05g37200.1,Orysa4|Os05g37210.1  
AT2G17695 Orysa4|Os03g01730.1,Orysa4|Os04g02890.1  
AT4G00752,AT4G23040,AT4G11740 Orysa4|Os09g35710.1  
AT1G59520 Orysa4|Os10g01380.1,Orysa4|Os04g10420.1  
Orysa4|Os03g50420.1  
AT2G23530,AT4G37110 Orysa4|Os03g37570.1,Orysa4|Os11g36030.1  
Orysa4|Os03g01240.1,Orysa4|Os10g40780.1  
AT1G02080  
Orysa4|Os07g22400.1  
AT1G67320  
AT1G14190,AT1G14185  
AT5G51930,AT3G56060,AT5G51950,AT1G12570  
Orysa4|Os02g45530.1,Orysa4|Os04g48400.1,Orysa4|Os03g02700.1,Orysa4|Os10g38050.1  
Orysa4|Os05g49000.1  
AT1G72970 Orysa4|Os08g31030.1,Orysa4|Os09g19930.1  
AT1G73050 Orysa4|Os06g44540.1  
AT3G27080,AT3G27070,AT5G40930,AT1G27390 Orysa4|Os01g69250.1  
AT2G26300 Orysa4|Os05g27520.1,Orysa4|Os05g26890.1  
AT3G61260,AT2G45820,AT3G48940,AT5G23750  
Orysa4|Os02g42880.1,Orysa4|Os04g45070.1,Orysa4|Os03g02040.1,Orysa4|Os10g36000.1  
AT4G00670 Orysa4|Os02g57840.1  
AT5G10780 Orysa4|Os03g24580.1  
Orysa4|Os05g43590.1,Orysa4|Os01g56010.1  
AT1G64020  
Orysa4|Os11g11500.1,Orysa4|Os11g11720.1  
Orysa4|Os11g18660.1  
AT2G25240,AT2G26390,AT3G45220,AT1G47710,AT2G35580,AT1G62170,AT2G14540,AT1G64030,AT1G64010,AT1G51330,AT1G63280 Orysa4|Os03g41419.1,Orysa4|Os03g41438.1  
Orysa4|Os04g45120.1,Orysa4|Os04g45110.1,Orysa4|Os01g16200.1,Orysa4|Os11g12420.1,Orysa4|Os11g12410.1,Orysa4|Os11g12460.1,Orysa4|Os11g12520.1,Orysa4|Os11g13530.1,Orysa4|Os11g13540.1,Orysa4|Os11g13560.1,Orysa4|Os11g12390.1  
Orysa4|Os11g12400.1  
Orysa4|Os11g37110.1  
Orysa4|Os09g08254.1  
AT5G65460,AT5G10470 Orysa4|Os06g11380.1  
Orysa4|Os06g06510.1  
Orysa4|Os12g22650.1,Orysa4|Os12g22680.1  
AT5G12910  
AT5G65350  
AT1G19890  
AT5G65360  
Orysa4|Os02g25940.1  
AT1G09200  
AT3G27360  
AT5G10980  
Orysa4|Os04g34240.1  
AT1G01370  
Orysa4|Os03g27310.1  
AT1G13370,AT1G75600  
AT5G10390  
Orysa4|Os11g05730.1  
AT5G10400  
Orysa4|Os06g06460.1  
AT4G40030  
Orysa4|Os06g06480.1  
Orysa4|Os01g64640.1

Orysa4|Os04g37780.1  
Orysa4|Os05g41080.1  
AT4G40040  
Orysa4|Os05g36280.1  
Orysa4|Os06g04030.1  
AT4G11720Orysa4|Os09g35720.1,Orysa4|Os05g18730.1  
Orysa4|Os08g34190.1  
AT2G25110Orysa4|Os08g17680.1  
AT2G27450 Orysa4|Os02g33080.1  
AT1G21370 Orysa4|Os04g35780.1  
AT1G31410 Orysa4|Os04g51310.1  
AT2G44120,AT2G01250,AT3G13580 Orysa4|Os08g13690.1,Orysa4|Os04g51630.1  
AT1G80750 Orysa4|Os11g19260.1,Orysa4|Os08g42920.1  
AT4G37240,AT2G23690,AT3G50800,AT5G66580 Orysa4|Os03g52940.1,Orysa4|Os07g03120.1  
AT3G20810 Orysa4|Os09g31380.1  
AT5G37478 Orysa4|Os09g13650.1  
AT3G01015,AT5G15510 Orysa4|Os03g11400.1  
AT1G52825,AT4G14615  
Orysa4|Os07g08410.1  
AT5G51880 Orysa4|Os03g02730.1  
AT5G55580 Orysa4|Os07g39430.1  
AT5G67140 Orysa4|Os06g07000.1  
AT3G42660 Orysa4|Os09g06560.1  
Orysa4|Os03g60920.1  
AT3G13440  
AT1G05350 Orysa4|Os02g30310.1  
AT5G10460 Orysa4|Os08g42950.1  
Orysa4|Os06g11990.1  
AT2G22125  
AT1G44120,AT1G77460 Orysa4|Os11g08090.1  
Orysa4|Os02g04760.1  
AT2G07050  
AT3G45130  
AT4G15340,AT4G15370,AT5G48010,AT1G78500,AT5G36150,AT5G42600,AT1G78950,AT1G78955,AT1G66960,AT1G78960,AT1G78970 Orysa4|Os08g12730.1  
Orysa4|Os06g28820.1  
Orysa4|Os02g04690.1,Orysa4|Os02g04710.1,Orysa4|Os11g08569.1  
Orysa4|Os02g04730.1  
Orysa4|Os11g18310.1  
Orysa4|Os11g35710.1  
Orysa4|Os11g18340.1  
Orysa4|Os11g18194.1  
Orysa4|Os05g14800.1  
Orysa4|Os02g04750.1  
Orysa4|Os11g18366.1  
AT1G78480  
Orysa4|Os06g28830.1  
Orysa4|Os09g38040.1  
AT2G42070  
Orysa4|Os02g42350.1,Orysa4|Os02g42330.1  
AT3G44310,AT3G44300,AT3G44320,AT5G22300  
Orysa4|Os01g33170.1  
Orysa4|Os01g33160.1  
AT3G17210  
AT3G58660,AT2G42650,AT1G06380 Orysa4|Os04g42200.1,Orysa4|Os05g48422.1  
AT3G22290 Orysa4|Os03g57100.1  
AT1G36050,AT1G22200 Orysa4|Os03g20520.1,Orysa4|Os05g41120.1  
Orysa4|Os02g57720.1,Orysa4|Os02g44630.1  
AT4G00430,AT1G01620,AT2G45960,AT3G61430,AT4G23400  
Orysa4|Os10g34000.1,Orysa4|Os03g64330.1  
Orysa4|Os04g47220.1  
AT2G39010,AT3G54820  
AT2G37180,AT2G37170,AT3G53420,AT5G60660  
Orysa4|Os04g44060.1,Orysa4|Os02g41860.1,Orysa4|Os07g26630.1  
AT2G16850,AT4G35100 Orysa4|Os04g16450.1  
AT4G37190 Orysa4|Os05g31190.1,Orysa4|Os03g13770.1,Orysa4|Os12g39650.1  
AT3G45900 Orysa4|Os03g63660.1  
AT3G22230,AT4G15000,AT2G32220 Orysa4|Os02g18380.1,Orysa4|Os10g41470.1  
AT4G34100 Orysa4|Os06g43210.1  
AT3G06710  
Orysa4|Os06g43200.1  
AT4G32670 Orysa4|Os08g01040.1  
AT1G21640 Orysa4|Os11g08590.1,Orysa4|Os11g08670.1  
AT2G46890 Orysa4|Os04g01510.1  
AT1G52590 Orysa4|Os01g07800.1  
AT2G02560 Orysa4|Os02g07340.1  
AT3G27090 Orysa4|Os05g41930.1  
AT2G35140 Orysa4|Os09g39020.1  
AT5G42050 Orysa4|Os05g51590.1,Orysa4|Os01g36950.1  
AT1G77230 Orysa4|Os02g34830.1  
AT5G23090,AT5G08190 Orysa4|Os08g29500.1  
AT1G05385 Orysa4|Os03g53640.1



AT1G29040 Orysa4|Os01g42770.1  
AT5G67480,AT4G37610  
AT1G05690 Orysa4|Os01g66890.1  
AT5G63160,AT3G48360 Orysa4|Os02g38320.1,Orysa4|Os04g40630.1  
AT4G19190 Orysa4|Os06g49510.1  
AT2G01100  
AT3G06000,AT5G19320,AT3G63130 Orysa4|Os05g33870.1,Orysa4|Os05g46560.1  
AT1G30590,AT2G39240,AT2G34750 Orysa4|Os06g47350.1  
Orysa4|Os08g45180.1  
AT4G28706,AT5G43910 Orysa4|Os10g32830.1  
AT1G50575 Orysa4|Os03g39010.1  
Orysa4|Os08g40880.1  
AT1G54080,AT3G14100,AT1G17370 Orysa4|Os11g40510.1  
Orysa4|Os07g42380.1  
AT3G14595  
AT1G29970  
AT1G17080,AT1G53560 Orysa4|Os01g47680.1,Orysa4|Os05g49020.1,Orysa4|Os01g14070.1  
AT3G26670 Orysa4|Os02g31874.1  
AT2G02710 Orysa4|Os01g09120.1  
AT1G16780,AT1G78920 Orysa4|Os02g33490.1  
Orysa4|Os02g55890.1,Orysa4|Os06g08080.1  
AT1G15690 Orysa4|Os02g09150.1  
Orysa4|Os05g06480.1,Orysa4|Os01g23580.1  
AT3G59390 Orysa4|Os11g16560.1  
AT2G19400  
AT4G33080 Orysa4|Os01g09200.1  
Orysa4|Os12g19290.1,Orysa4|Os05g43570.1  
AT1G30640  
AT5G09890  
AT2G20470,AT1G03920,AT3G23310,AT4G14350 Orysa4|Os10g33640.1  
Orysa4|Os02g39000.1  
AT1G30320 Orysa4|Os04g52920.1  
Orysa4|Os03g02840.1  
AT2G02170 Orysa4|Os02g02500.1  
AT3G57540,AT2G41870 Orysa4|Os07g10780.1  
Orysa4|Os02g44102.1  
AT1G53860 Orysa4|Os11g40210.1  
Orysa4|Os12g41940.1  
AT1G67590  
AT5G57570,AT5G57640,AT2G03230,AT5G02210,AT1G14060 Orysa4|Os07g06460.1  
AT5G52950 Orysa4|Os01g12250.1  
AT2G47180,AT1G09350,AT1G56600,AT5G23790,AT4G26250,AT5G30500,AT1G60470,AT1G60450  
Orysa4|Os07g48830.1,Orysa4|Os03g20120.1  
AT1G05150,AT2G32450 Orysa4|Os03g15740.1  
AT5G61460,AT5G07660 Orysa4|Os09g03370.1  
AT1G11915,AT1G10380,AT3G44716 Orysa4|Os06g25950.1  
AT2G20800,AT4G21490,AT4G05020 Orysa4|Os08g04630.1,Orysa4|Os05g26660.1  
AT4G28220 Orysa4|Os06g47000.1  
Orysa4|Os12g19304.1  
AT1G67810  
AT5G50210  
AT5G43190 Orysa4|Os01g33490.1  
AT4G27940,AT2G46320 Orysa4|Os01g12470.1,Orysa4|Os08g29720.1  
AT4G31560 Orysa4|Os01g71330.1  
AT1G28140 Orysa4|Os03g63360.1  
Orysa4|Os01g43050.1  
AT1G15660  
AT3G61620 Orysa4|Os09g07820.1  
AT1G58120 Orysa4|Os02g52300.1  
AT1G16570 Orysa4|Os06g36890.1,Orysa4|Os03g08300.1  
AT1G51540  
AT3G27220 Orysa4|Os08g03420.1  
AT4G35530 Orysa4|Os05g07260.1  
AT5G36980,AT5G08600,AT4G02400 Orysa4|Os03g22320.1  
AT5G16520 Orysa4|Os01g01040.1  
AT3G63390 Orysa4|Os11g40200.1  
Orysa4|Os03g15650.1  
AT3G19770  
AT5G09320 Orysa4|Os04g39970.1  
Orysa4|Os01g19510.1,Orysa4|Os03g62580.1  
AT3G02570,AT1G67070  
Orysa4|Os01g03710.1,Orysa4|Os09g22090.1,Orysa4|Os11g38810.1,Orysa4|Os02g45230.1  
AT1G04210 Orysa4|Os03g53250.1  
AT5G24170 Orysa4|Os01g11980.1  
AT5G23550 Orysa4|Os02g35640.1  
AT4G03280 Orysa4|Os07g37030.1  
AT4G24090 Orysa4|Os09g35990.1  
AT3G56310 Orysa4|Os07g48160.1  
AT5G08370  
AT5G08380 Orysa4|Os10g35070.1  
Orysa4|Os07g26900.1

Orysa4|Os10g35110.1  
AT3G52710,AT2G36220 Orysa4|Os02g33060.1,Orysa4|Os04g33670.1,Orysa4|Os01g64180.1  
AT1G34630 Orysa4|Os03g09090.1  
AT1G44608,AT1G21830 Orysa4|Os04g59420.1  
AT1G06660,AT2G30820 Orysa4|Os06g45870.1,Orysa4|Os02g07180.1,Orysa4|Os03g56590.1  
AT3G53020,AT2G36620 Orysa4|Os07g12250.1,Orysa4|Os05g40820.1  
Orysa4|Os10g36250.1  
AT1G33400  
Orysa4|Os11g26150.1,Orysa4|Os12g36030.1,Orysa4|Os06g46149.1  
AT1G16610,AT1G79100 Orysa4|Os01g72890.1,Orysa4|Os05g01540.1  
AT5G11640 Orysa4|Os01g10340.1  
Orysa4|Os11g44860.1  
AT5G38560,AT1G26150 Orysa4|Os05g01040.1,Orysa4|Os01g02040.1  
Orysa4|Os09g16650.1  
AT1G30570 Orysa4|Os07g05370.1,Orysa4|Os04g52860.1  
Orysa4|Os11g40240.1  
AT1G61860  
AT4G23050,AT4G00340  
Orysa4|Os01g03690.1  
AT3G57760 Orysa4|Os11g35100.1,Orysa4|Os04g30280.1,Orysa4|Os11g29510.1,Orysa4|Os04g29950.1  
AT1G55200,AT3G13690 Orysa4|Os05g51190.1,Orysa4|Os01g41870.1  
AT2G41970 Orysa4|Os02g35760.1  
Orysa4|Os08g18920.1  
AT1G11330,AT1G11350,AT1G11300  
AT5G15730  
AT3G49060  
Orysa4|Os01g38840.1,Orysa4|Os01g38900.1  
Orysa4|Os10g09690.1  
AT3G17420  
Orysa4|Os03g31260.1  
AT2G32800 Orysa4|Os11g25860.1  
AT2G45590,AT4G25390,AT5G51770 Orysa4|Os03g14710.1  
Orysa4|Os05g16670.1,Orysa4|Os05g17810.1,Orysa4|Os04g52630.1  
Orysa4|Os12g06670.1  
Orysa4|Os09g16950.1,Orysa4|Os09g17110.1  
Orysa4|Os04g56090.1,Orysa4|Os04g56080.1,Orysa4|Os06g06920.1,Orysa4|Os06g06930.1,Orysa4|Os06g06940.1,Orysa4|Os12g34320.1  
AT2G24620  
Orysa4|Os10g09620.1,Orysa4|Os10g02720.1,Orysa4|Os10g09700.1,Orysa4|Os10g06030.1,Orysa4|Os10g06140.1,Orysa4|Os07g14490.1,Orysa4|Os10g01390.1,Orysa4|Os10g17910.1,Orysa4|Os10g02250.1,Orysa4|Os11g46900.1,Orysa4|Os11g46870.1,Orysa4|Os11g47150.1,Orysa4|Os11g46880.1,Orysa4|Os11g46950.1,Orysa4|Os11g4860.1,Orysa4|Os11g47110.1  
AT4G35030,AT2G16750 Orysa4|Os03g13820.1  
AT5G56890  
AT3G01300,AT5G15080,AT3G28690  
AT3G01840,AT2G30940  
Orysa4|Os06g46330.1,Orysa4|Os02g06930.1,Orysa4|Os08g10070.1  
Orysa4|Os08g25430.1  
AT3G26940 Orysa4|Os03g17550.1  
Orysa4|Os01g36550.1  
Orysa4|Os02g08530.1,Orysa4|Os05g25540.1  
Orysa4|Os10g12620.1  
AT5G58940  
AT3G27560,AT5G40540,AT5G50180 Orysa4|Os02g38080.1  
AT1G21590,AT1G77280,AT5G63940 Orysa4|Os03g62340.1  
AT2G46850 Orysa4|Os10g21090.1  
AT2G40270 Orysa4|Os01g20900.1,Orysa4|Os01g20880.1  
AT3G15356  
Orysa4|Os05g14220.1  
AT5G60900  
AT3G58690 Orysa4|Os05g11750.1  
AT1G24030 Orysa4|Os09g20880.1  
AT5G57680  
Orysa4|Os12g26940.1  
AT1G80870 Orysa4|Os08g17320.1  
AT5G11850  
Orysa4|Os05g30870.1,Orysa4|Os01g71000.1  
Orysa4|Os10g09570.1  
Orysa4|Os06g50920.1  
Orysa4|Os06g10160.1,Orysa4|Os02g53750.1,Orysa4|Os08g35600.1  
AT3G51990 Orysa4|Os05g32170.1  
Orysa4|Os11g39490.1,Orysa4|Os04g30040.1,Orysa4|Os11g17380.1,Orysa4|Os04g30030.1  
AT2G41890 Orysa4|Os10g01100.1  
Orysa4|Os10g38920.1  
Orysa4|Os12g42050.1,Orysa4|Os12g42040.1,Orysa4|Os03g44050.1  
AT2G17090  
AT4G11900  
AT1G51940 Orysa4|Os01g53840.1  
Orysa4|Os11g40430.1  
AT3G59420 Orysa4|Os03g43670.1  
Orysa4|Os04g30360.1  
AT5G35380,AT2G07020,AT2G24370,AT4G31230,AT1G16760,AT1G78940

Orysa4|Os02g54590.1,Orysa4|Os06g09230.1  
AT4G28670  
Orysa4|Os05g44030.1,Orysa4|Os01g54700.1,Orysa4|Os03g38710.1,Orysa4|Os09g14580.1,Orysa4|Os03  
g16260.1  
AT2G23770  
Orysa4|Os04g30340.1  
Orysa4|Os09g20750.1  
Orysa4|Os07g38070.1  
Orysa4|Os04g12180.1,Orysa4|Os04g12080.1  
AT1G29720  
Orysa4|Os01g23970.1  
Orysa4|Os01g09860.1  
Orysa4|Os05g13770.1  
AT3G24550 Orysa4|Os05g12680.1  
AT4G02410,AT4G02420,AT2G37710,AT3G53810  
Orysa4|Os07g38800.1,Orysa4|Os07g38820.1,Orysa4|Os02g42780.1,Orysa4|Os04g44900.1,Orysa4|Os03  
g15250.1,Orysa4|Os07g38810.1,Orysa4|Os04g44910.1,Orysa4|Os10g30540.1,Orysa4|Os10g30530.1,Orysa4|Os06g  
14260.1,Orysa4|Os07g15930.1,Orysa4|Os07g18230.1,Orysa4|Os07g03880.1,Orysa4|Os07g03830.1,Orysa4|Os09g0  
9500.1,Orysa4|Os07g03810.1,Orysa4|Os03g56160.1,Orysa4|Os07g03820.1,Orysa4|Os07g03840.1,Orysa4|Os07g03  
890.1,Orysa4|Os07g03860.1,Orysa4|Os09g09510.1,Orysa4|Os07g18240.1,Orysa4|Os07g03850.1,Orysa4|Os07g037  
80.1,Orysa4|Os07g03900.1,Orysa4|Os07g03920.1,Orysa4|Os07g03950.1,Orysa4|Os07g04010.1,Orysa4|Os07g0387  
0.1,Orysa4|Os02g19530.1,Orysa4|Os07g03790.1,Orysa4|Os07g04000.1  
Orysa4|Os09g24330.1  
AT1G52310 Orysa4|Os01g01410.1  
Orysa4|Os06g05050.1,Orysa4|Os02g02120.1,Orysa4|Os02g56400.1,Orysa4|Os02g56630.1,Orysa4|Os02  
g56380.1,Orysa4|Os02g56330.1,Orysa4|Os08g27780.1,Orysa4|Os09g29584.1,Orysa4|Os09g29520.1,Orysa4|Os09g  
20740.1,Orysa4|Os06g07330.1,Orysa4|Os02g41480.1,Orysa4|Os02g41500.1,Orysa4|Os01g26780.1,Orysa4|Os01g2  
6280.1,Orysa4|Os04g43730.1,Orysa4|Os06g49260.1,Orysa4|Os06g49170.1  
AT1G76360  
AT3G16530 Orysa4|Os12g14699.1  
AT4G00955 Orysa4|Os01g40540.1  
Orysa4|Os12g41490.1,Orysa4|Os12g41530.1,Orysa4|Os12g41510.1,Orysa4|Os12g41540.1,Orysa4|Os12  
g41270.1  
AT3G45920  
AT3G57740  
Orysa4|Os04g10970.1  
Orysa4|Os05g07420.1,Orysa4|Os05g07450.1,Orysa4|Os05g07300.1,Orysa4|Os05g07470.1,Orysa4|Os04  
g01310.1,Orysa4|Os04g01320.1,Orysa4|Os04g28780.1,Orysa4|Os07g08860.1,Orysa4|Os11g10280.1,Orysa4|Os04g  
34330.1,Orysa4|Os04g34390.1,Orysa4|Os04g07200.1,Orysa4|Os05g07080.1,Orysa4|Os10g20120.1,Orysa4|Os10g2  
0160.1,Orysa4|Os04g34410.1,Orysa4|Os04g34420.1,Orysa4|Os04g34370.1,Orysa4|Os04g34270.1,Orysa4|Os04g34  
320.1,Orysa4|Os04g34290.1,Orysa4|Os04g34250.1,Orysa4|Os04g42740.1,Orysa4|Os01g06240.1  
AT5G22050  
Orysa4|Os02g05820.1  
Orysa4|Os07g04820.1,Orysa4|Os06g13320.1,Orysa4|Os07g04810.1,Orysa4|Os04g56120.1,Orysa4|Os04  
g56130.1,Orysa4|Os04g56110.1  
Orysa4|Os07g14470.1  
Orysa4|Os01g04450.1  
Orysa4|Os11g45280.1  
Orysa4|Os11g45540.1  
AT1G19090,AT5G40380,AT1G70530  
Orysa4|Os07g04110.1  
Orysa4|Os02g48080.1,Orysa4|Os06g30130.1  
Orysa4|Os01g02770.1,Orysa4|Os01g02840.1,Orysa4|Os01g02750.1,Orysa4|Os01g02790.1,Orysa4|Os01  
g02600.1,Orysa4|Os01g02400.1,Orysa4|Os01g02560.1,Orysa4|Os01g02440.1,Orysa4|Os01g02420.1,Orysa4|Os01g  
02690.1,Orysa4|Os01g02360.1,Orysa4|Os01g02290.1  
Orysa4|Os07g26170.1,Orysa4|Os12g16540.1  
AT1G11050,Orysa4|Os01g66020.1,Orysa4|Os05g34950.1  
Orysa4|Os10g17950.1,Orysa4|Os10g17960.1,Orysa4|Os10g18260.1  
AT3G05140,AT5G35960,AT5G18910  
AT3G06640,AT3G06620,AT3G06630,AT5G49470,AT1G67890 Orysa4|Os12g37570.1  
AT1G62400  
Orysa4|Os06g35870.1  
AT4G17660,AT5G47070  
AT5G11360,AT5G11410,AT5G11400,AT5G03350,AT5G25440  
Orysa4|Os11g35260.1  
Orysa4|Os05g41370.1  
Orysa4|Os01g65940.1  
Orysa4|Os04g04790.1,Orysa4|Os12g41570.1  
AT4G35600  
Orysa4|Os07g15940.1  
Orysa4|Os11g46810.1  
AT4G00330 Orysa4|Os03g05470.1,Orysa4|Os01g63280.1  
AT5G18610  
Orysa4|Os07g36570.1  
AT3G55950 Orysa4|Os05g03620.1  
Orysa4|Os09g09220.1  
AT3G12000 Orysa4|Os02g57700.1  
AT1G70740 Orysa4|Os09g24340.1  
Orysa4|Os03g12520.1  
AT1G25390,AT1G66880,AT5G38210,AT1G18390  
AT4G03230 Orysa4|Os04g54190.1  
Orysa4|Os04g45170.1

AT2G17160  
AT5G03320,AT3G09830,AT2G39110 Orysa4|Os10g30600.1,Orysa4|Os02g57420.1  
Orysa4|Os02g39560.1  
Orysa4|Os12g01740.1,Orysa4|Os11g01740.1  
AT5G01060,AT3G09240  
Orysa4|Os01g57560.1,Orysa4|Os05g42210.1  
Orysa4|Os01g12720.1  
AT3G09010 Orysa4|Os03g15770.1  
Orysa4|Os06g07230.1  
Orysa4|Os04g51040.1,Orysa4|Os04g51050.1  
AT4G23210,AT4G23300,AT4G23190,AT4G23200,AT4G23220,AT4G11530,AT4G11490,AT4G11480,AT4G11470,AT4  
G23240,AT4G23290,AT4G23320,AT4G11460,AT4G23250,AT4G23260,AT4G23140,AT4G23160,AT4G23150,AT4G23  
230,AT4G23180,AT4G23270,AT4G23280,AT4G23310,AT3G45860,AT4G23130,AT4G05200,AT4G21400,AT4G21410,  
AT4G00960,AT4G00970,AT4G38830,AT4G21230  
AT3G55550 Orysa4|Os12g38610.1  
Orysa4|Os01g39970.1  
Orysa4|Os04g54180.1,Orysa4|Os04g54130.1  
Orysa4|Os09g39650.1  
Orysa4|Os09g16980.1  
Orysa4|Os07g49470.1  
AT5G57670 Orysa4|Os08g15060.1  
AT3G46290,AT5G59700 Orysa4|Os06g22810.1,Orysa4|Os05g06990.1,Orysa4|Os03g17300.1  
Orysa4|Os09g39930.1  
AT2G39180,AT3G09780,AT5G39370  
AT5G02290  
AT5G01550,AT5G01560,AT5G01540,AT3G08870  
Orysa4|Os02g42620.1  
AT2G42960,AT3G59110 Orysa4|Os01g41730.1,Orysa4|Os10g35450.1,Orysa4|Os01g44110.1  
AT3G21630 Orysa4|Os09g33630.1,Orysa4|Os08g42580.1  
AT5G59010,AT3G54030  
Orysa4|Os10g10540.1,Orysa4|Os04g30110.1,Orysa4|Os07g06570.1  
Orysa4|Os08g03002.1  
Orysa4|Os04g39180.1  
Orysa4|Os02g12130.1  
Orysa4|Os01g49580.1  
AT5G13160 Orysa4|Os02g30900.1,Orysa4|Os04g32310.1  
AT1G70450,AT1G70460,AT1G23540,AT1G10620  
Orysa4|Os06g47530.1,Orysa4|Os06g47790.1,Orysa4|Os06g47470.1  
Orysa4|Os07g14500.1  
AT5G24080 Orysa4|Os04g29680.1  
AT2G26290  
Orysa4|Os07g35140.1  
AT4G21390,AT1G61610  
Orysa4|Os07g12850.1  
Orysa4|Os11g10710.1,Orysa4|Os11g10690.1,Orysa4|Os11g10640.1  
AT5G10520,AT5G65530 Orysa4|Os06g45350.1  
Orysa4|Os09g29560.1,Orysa4|Os09g29510.1  
Orysa4|Os07g04130.1,Orysa4|Os07g04040.1  
AT3G46410 Orysa4|Os01g59560.1  
AT2G33580 Orysa4|Os02g09960.1,Orysa4|Os06g41980.1,Orysa4|Os06g41960.1  
Orysa4|Os06g34960.1  
AT1G07460 Orysa4|Os06g38160.1  
AT5G56790  
Orysa4|Os03g29410.1,Orysa4|Os07g42200.1  
Orysa4|Os01g23690.1,Orysa4|Os04g29580.1  
AT1G76370,AT1G20650  
AT5G35370 Orysa4|Os09g28180.1,Orysa4|Os02g52850.1,Orysa4|Os12g44320.1  
Orysa4|Os01g73390.1  
Orysa4|Os10g34220.1,Orysa4|Os11g28104.1  
AT5G35580,AT2G05940 Orysa4|Os03g08170.1,Orysa4|Os10g25550.1  
AT4G02010 Orysa4|Os01g14932.1  
Orysa4|Os05g30820.1,Orysa4|Os01g70970.1  
Orysa4|Os03g60710.1  
AT1G65790,AT1G65800,AT4G21380,AT4G21366,AT4G21370  
Orysa4|Os01g57540.1,Orysa4|Os01g57510.1,Orysa4|Os03g35600.1,Orysa4|Os07g36544.1  
AT3G20200  
AT4G02630 Orysa4|Os11g44550.1  
Orysa4|Os09g37810.1  
AT4G10390,AT1G33260  
Orysa4|Os02g43290.1,Orysa4|Os04g45730.1,Orysa4|Os10g37190.1,Orysa4|Os03g02190.1  
AT1G16260,AT1G69730,AT1G79680,AT4G31100,AT4G31110,AT1G19390,AT1G17910,AT1G16120,AT1G16160,AT1  
G16140,AT1G16150,AT1G16130,AT1G79670  
AT4G01330  
Orysa4|Os08g13420.1,Orysa4|Os08g13870.1,Orysa4|Os03g61310.1  
Orysa4|Os04g01890.1  
Orysa4|Os10g26000.1  
AT5G65500  
Orysa4|Os07g39760.1,Orysa4|Os08g01280.1  
Orysa4|Os12g08050.1,Orysa4|Os12g07990.1,Orysa4|Os11g08950.1  
Orysa4|Os04g34300.1

AT4G18250,AT1G70250,AT1G66930,AT1G67000,AT1G66910,AT5G38260,AT5G38250,AT5G38240,AT1G66920,AT5G39020,AT5G39030  
Orysa4|Os01g04550.1,Orysa4|Os01g04570.1,Orysa4|Os01g04490.1,Orysa4|Os04g09770.1,Orysa4|Os01g04460.1,Orysa4|Os01g04580.1,Orysa4|Os08g24630.1,Orysa4|Os08g24780.1,Orysa4|Os01g04520.1  
Orysa4|Os05g44290.1,Orysa4|Os01g54350.1  
Orysa4|Os01g01110.1  
AT2G28930,AT1G07570 Orysa4|Os05g02020.1,Orysa4|Os01g74200.1,Orysa4|Os03g16740.1  
Orysa4|Os01g01740.1  
AT4G04960,AT4G28350,AT1G15530  
Orysa4|Os11g44660.1,Orysa4|Os11g44690.1  
Orysa4|Os11g35330.1  
Orysa4|Os06g10790.1,Orysa4|Os10g38960.1  
Orysa4|Os01g60700.1  
Orysa4|Os07g31210.1,Orysa4|Os07g31130.1,Orysa4|Os07g31190.1  
Orysa4|Os05g28520.1,Orysa4|Os07g49240.1  
AT3G63260  
Orysa4|Os11g46850.1  
Orysa4|Os04g54020.1,Orysa4|Os04g54070.1  
Orysa4|Os03g12150.1  
AT5G54380  
AT4G04490,AT4G04500,AT4G04570,AT4G04540,AT4G04510  
Orysa4|Os11g02860.1  
Orysa4|Os01g21970.1  
AT2G11520 Orysa4|Os04g42480.1,Orysa4|Os09g03620.1  
AT3G51550 Orysa4|Os01g56330.1,Orysa4|Os03g21540.1  
Orysa4|Os06g44430.1  
AT5G18470  
Orysa4|Os04g30250.1,Orysa4|Os02g27310.1  
Orysa4|Os08g24770.1,Orysa4|Os12g42060.1,Orysa4|Os11g35240.1  
AT1G21245  
Orysa4|Os06g07070.1  
Orysa4|Os09g16590.1  
AT4G32000,AT2G25220,AT5G11020  
Orysa4|Os01g02350.1,Orysa4|Os01g02320.1,Orysa4|Os01g02580.1,Orysa4|Os01g02390.1,Orysa4|Os01g02570.1,Orysa4|Os01g02430.1,Orysa4|Os01g02700.1,Orysa4|Os01g02410.1,Orysa4|Os01g02680.1,Orysa4|Os01g02610.1,Orysa4|Os01g02830.1,Orysa4|Os01g02800.1,Orysa4|Os01g02730.1,Orysa4|Os01g02780.1,Orysa4|Os01g02550.1  
AT5G12000,AT5G26150 Orysa4|Os02g12660.1  
AT3G20530  
Orysa4|Os05g25390.1  
AT2G17170  
AT5G65600,AT5G10530  
Orysa4|Os03g56180.1,Orysa4|Os03g60810.1  
Orysa4|Os03g53410.1  
Orysa4|Os11g12270.1,Orysa4|Os10g01410.1,Orysa4|Os10g05160.1,Orysa4|Os11g35120.1,Orysa4|Os10g05400.1,Orysa4|Os11g35220.1,Orysa4|Os11g35290.1,Orysa4|Os11g35274.1,Orysa4|Os10g02360.1  
AT1G22720  
AT1G28390  
AT4G11890  
AT2G20300 Orysa4|Os02g57080.1  
Orysa4|Os02g02780.1  
Orysa4|Os05g47770.1,Orysa4|Os01g49529.1,Orysa4|Os01g49614.1  
AT3G59750,AT3G59740,AT3G59700,AT3G59730,AT2G43690,AT2G43700,AT4G29050,AT1G70110,AT1G70130  
AT2G47060,AT3G62220  
Orysa4|Os03g62180.1  
Orysa4|Os06g41560.1,Orysa4|Os06g41510.1  
AT2G28250 Orysa4|Os02g02040.1  
Orysa4|Os03g61060.1  
Orysa4|Os05g38770.1  
AT1G63500,AT5G41260 Orysa4|Os04g58750.1  
AT1G72540  
Orysa4|Os06g48980.1  
AT5G51270,AT4G25160,AT5G61550,AT5G61560  
Orysa4|Os03g01160.1,Orysa4|Os10g41220.1,Orysa4|Os06g04880.1  
Orysa4|Os06g41500.1  
Orysa4|Os11g10290.1  
Orysa4|Os04g59000.1,Orysa4|Os08g01270.1  
Orysa4|Os04g12200.1  
AT5G57035,AT2G19410 Orysa4|Os02g12670.1,Orysa4|Os06g37620.1  
AT2G42630 Orysa4|Os08g13700.1,Orysa4|Os03g39150.1  
AT1G66460,AT5G37790  
Orysa4|Os06g05830.1,Orysa4|Os08g28710.1,Orysa4|Os11g44500.1,Orysa4|Os12g31560.1,Orysa4|Os11g44260.1,Orysa4|Os11g44430.1  
AT1G01540 Orysa4|Os03g03410.1  
Orysa4|Os10g01060.1  
AT2G07180 Orysa4|Os06g45280.1  
AT5G18500  
Orysa4|Os09g19390.1  
Orysa4|Os11g40400.1  
Orysa4|Os02g12810.1  
AT1G18160,AT1G73660  
Orysa4|Os04g51030.1,Orysa4|Os04g51010.1

Orysa4|Os04g01860.1,Orysa4|Os04g01874.1,Orysa4|Os08g40270.1  
AT3G45390 Orysa4|Os07g29330.1  
AT5G06740 Orysa4|Os04g49460.1  
AT1G61460,AT1G61420,AT1G61480,AT1G61490,AT1G61500,AT1G61400,AT1G61440,AT1G61430,AT1G61550,AT1  
G61390,AT1G61380,AT1G61360,AT1G11280,AT1G61370  
Orysa4|Os01g73370.1  
Orysa4|Os07g47270.1  
Orysa4|Os08g29020.1  
Orysa4|Os05g25370.1,Orysa4|Os05g25450.1  
AT1G52290,AT3G24540  
AT5G23170  
Orysa4|Os10g17890.1  
Orysa4|Os07g34980.1  
Orysa4|Os06g45300.1  
AT1G70520 Orysa4|Os05g03920.1  
Orysa4|Os02g06160.1  
AT5G61350 Orysa4|Os03g55210.1  
AT2G39360  
Orysa4|Os10g04730.1,Orysa4|Os10g04720.1,Orysa4|Os01g26390.1  
AT5G54590 Orysa4|Os08g04420.1  
Orysa4|Os12g30180.1  
AT1G16110  
Orysa4|Os02g48200.1,Orysa4|Os02g48210.1,Orysa4|Os06g22290.1,Orysa4|Os08g40280.1  
Orysa4|Os03g21170.1  
Orysa4|Os01g66630.1,Orysa4|Os01g66680.1  
AT3G19300,AT1G49730 Orysa4|Os04g35114.1  
AT4G34500 Orysa4|Os03g12680.1  
Orysa4|Os02g56420.1  
AT3G57770 Orysa4|Os11g35860.1  
AT3G15890,AT1G52540  
AT1G06700,AT2G30740,AT2G30730  
AT2G43230,AT3G59350 Orysa4|Os09g33860.1  
AT1G65190,AT1G65250,AT1G67470,AT3G57640  
AT1G53070 Orysa4|Os05g16360.1  
Orysa4|Os11g11780.1  
Orysa4|Os02g45750.1  
Orysa4|Os05g04520.1  
AT2G23450,AT5G66790 Orysa4|Os12g40419.1  
AT4G38470 Orysa4|Os09g37230.1  
Orysa4|Os11g18980.1,Orysa4|Os01g65030.1  
Orysa4|Os09g14660.1  
Orysa4|Os04g45920.1,Orysa4|Os02g43430.1  
Orysa4|Os04g29770.1,Orysa4|Os04g20680.1,Orysa4|Os04g30330.1,Orysa4|Os04g30270.1,Orysa4|Os04  
g30060.1,Orysa4|Os04g29960.1,Orysa4|Os04g30160.1,Orysa4|Os04g30240.1,Orysa4|Os04g29990.1,Orysa4|Os04g  
30010.1,Orysa4|Os04g29930.1,Orysa4|Os04g30370.1  
AT3G53840  
AT1G11410,AT1G11340  
Orysa4|Os07g35290.1,Orysa4|Os07g35300.1,Orysa4|Os07g35260.1,Orysa4|Os07g35580.1,Orysa4|Os07  
g35680.1,Orysa4|Os07g35660.1,Orysa4|Os07g43560.1,Orysa4|Os07g35690.1,Orysa4|Os07g35650.1,Orysa4|Os07g  
35700.1,Orysa4|Os07g35310.1,Orysa4|Os07g35390.1,Orysa4|Os07g35370.1,Orysa4|Os07g35810.1,Orysa4|Os07g3  
5790.1,Orysa4|Os07g35750.1,Orysa4|Os07g35740.1,Orysa4|Os07g36980.1,Orysa4|Os07g35770.1,Orysa4|Os07g43  
570.1  
AT3G21450  
Orysa4|Os11g26140.1  
Orysa4|Os04g54010.1,Orysa4|Os04g54120.1,Orysa4|Os04g54080.1,Orysa4|Os04g53998.1,Orysa4|Os04  
g54110.1,Orysa4|Os04g54002.1,Orysa4|Os04g53994.1,Orysa4|Os04g15580.1,Orysa4|Os09g37840.1,Orysa4|Os09g  
37880.1,Orysa4|Os09g37890.1,Orysa4|Os09g37800.1,Orysa4|Os09g37780.1,Orysa4|Os08g08140.1  
AT3G16030 Orysa4|Os11g42440.1,Orysa4|Os01g42310.1  
Orysa4|Os02g57560.1  
AT1G08720 Orysa4|Os10g29540.1,Orysa4|Os03g06410.1  
AT5G28680,AT3G04690 Orysa4|Os05g20150.1,Orysa4|Os01g14926.1  
Orysa4|Os10g01560.1,Orysa4|Os03g56470.1  
Orysa4|Os09g19380.1,Orysa4|Os09g19510.1,Orysa4|Os09g17970.1,Orysa4|Os09g18530.1  
Orysa4|Os04g58250.1  
Orysa4|Os01g26300.1,Orysa4|Os01g26788.1,Orysa4|Os01g26210.1,Orysa4|Os03g62430.1,Orysa4|Os04  
g03830.1,Orysa4|Os02g42110.1,Orysa4|Os10g10130.1,Orysa4|Os10g10030.1,Orysa4|Os04g24290.1,Orysa4|Os04g  
24220.1,Orysa4|Os04g24300.1,Orysa4|Os04g21790.1,Orysa4|Os04g21820.1,Orysa4|Os02g42160.1,Orysa4|Os02g4  
2190.1,Orysa4|Os05g04460.1  
AT1G67520,AT4G27290,AT4G27300  
Orysa4|Os02g26160.1  
Orysa4|Os12g14610.1  
AT1G14000 Orysa4|Os07g43900.1  
Orysa4|Os07g48730.1  
Orysa4|Os12g14480.1  
Orysa4|Os01g36500.1  
Orysa4|Os09g07730.1  
AT4G32300 Orysa4|Os06g29810.1  
AT3G57710,AT3G57730,AT3G57720  
AT5G42440 Orysa4|Os11g06780.1  
AT5G01020 Orysa4|Os12g02810.1,Orysa4|Os11g02830.1  
Orysa4|Os07g07390.1

Orysa4|Os12g41260.1  
Orysa4|Os02g19550.1,Orysa4|Os07g03930.1  
Orysa4|Os03g03890.1  
Orysa4|Os05g41950.1,Orysa4|Os01g57940.1  
Orysa4|Os05g16320.1  
AT5G46570 Orysa4|Os10g42110.1  
AT3G46930,AT5G58950 Orysa4|Os01g10450.1  
Orysa4|Os02g09359.1  
Orysa4|Os02g34430.1,Orysa4|Os04g35080.1  
Orysa4|Os01g04470.1,Orysa4|Os09g29600.1,Orysa4|Os09g02410.1,Orysa4|Os01g26270.1  
Orysa4|Os03g13080.1  
Orysa4|Os11g40370.1  
AT5G55830 Orysa4|Os06g17490.1  
AT2G17220 Orysa4|Os06g51170.1,Orysa4|Os02g02600.1,Orysa4|Os02g44920.1,Orysa4|Os04g47620.1  
Orysa4|Os10g09550.1  
Orysa4|Os11g40250.1  
AT3G57120  
AT5G60090,AT5G60080  
Orysa4|Os11g11890.1  
AT3G26700 Orysa4|Os01g70410.1  
Orysa4|Os03g61010.1  
Orysa4|Os07g31290.1  
AT2G23200 Orysa4|Os03g03280.1,Orysa4|Os10g39010.1  
AT4G14780,AT3G22750 Orysa4|Os03g43760.1  
AT2G45910 Orysa4|Os02g44600.1,Orysa4|Os10g40100.1,Orysa4|Os10g40060.1  
AT2G19130 Orysa4|Os01g40499.1,Orysa4|Os01g66610.1,Orysa4|Os01g65010.1,Orysa4|Os01g45520.1  
Orysa4|Os12g29430.1  
AT3G07070,AT3G24790,AT4G13190  
AT1G49270,AT3G18810,AT4G34440  
AT1G56720,AT1G09440 Orysa4|Os01g21960.1  
Orysa4|Os02g44610.1  
Orysa4|Os04g24510.1  
AT3G52530,AT3G57700,AT3G57750  
AT5G20050 Orysa4|Os06g05070.1  
Orysa4|Os01g51290.1  
AT5G56460 Orysa4|Os10g29620.1,Orysa4|Os03g06330.1  
Orysa4|Os05g34390.1  
Orysa4|Os01g66250.1,Orysa4|Os12g07800.1,Orysa4|Os12g03650.1,Orysa4|Os11g03840.1,Orysa4|Os12g03670.1,Orysa4|Os11g03880.1,Orysa4|Os12g03690.1,Orysa4|Os12g03640.1,Orysa4|Os03g30890.1,Orysa4|Os06g38100.1,Orysa4|Os06g37750.1,Orysa4|Os06g37690.1,Orysa4|Os06g37670.1  
AT2G01780  
AT2G29250,AT2G29220  
AT1G26970,AT1G69790,AT2G02800,AT1G14370 Orysa4|Os10g26520.1  
AT1G61590  
Orysa4|Os09g12000.1,Orysa4|Os05g25430.1  
Orysa4|Os04g03579.1,Orysa4|Os04g05470.1,Orysa4|Os04g04914.1,Orysa4|Os04g04670.1,Orysa4|Os10g03990.1,Orysa4|Os04g06210.1,Orysa4|Os04g03530.1,Orysa4|Os04g06244.1,Orysa4|Os04g05580.1  
Orysa4|Os01g67340.1  
Orysa4|Os01g28290.1  
Orysa4|Os01g04530.1  
Orysa4|Os01g53640.1  
Orysa4|Os07g30410.1,Orysa4|Os07g30510.1  
AT1G53060  
Orysa4|Os09g36320.1  
Orysa4|Os08g27810.1  
Orysa4|Os02g58610.1  
AT5G02070  
AT3G17410,AT1G48210,AT1G48220  
Orysa4|Os07g35540.1,Orysa4|Os07g35410.1,Orysa4|Os07g35380.1,Orysa4|Os07g35340.1,Orysa4|Os07g35330.1,Orysa4|Os07g35280.1  
AT2G21480,AT4G39110 Orysa4|Os06g03610.1  
Orysa4|Os01g36790.1  
AT1G34300  
AT5G50000,AT3G01490 Orysa4|Os05g50190.1,Orysa4|Os01g45380.1  
Orysa4|Os11g34610.1,Orysa4|Os11g34624.1  
Orysa4|Os08g01830.1  
Orysa4|Os03g37120.1,Orysa4|Os06g29080.1  
AT1G54820 Orysa4|Os05g33080.1  
Orysa4|Os07g20610.1  
Orysa4|Os09g38830.1,Orysa4|Os02g56370.1,Orysa4|Os12g16520.1,Orysa4|Os09g38840.1,Orysa4|Os09g38850.1,Orysa4|Os09g38910.1,Orysa4|Os08g39220.1,Orysa4|Os09g30454.1,Orysa4|Os08g39240.1,Orysa4|Os08g29040.1,Orysa4|Os08g39170.1,Orysa4|Os08g39210.1  
Orysa4|Os04g58890.1  
AT2G43850,AT3G59830,AT2G31800 Orysa4|Os01g66860.1  
AT4G35230 Orysa4|Os10g39670.1,Orysa4|Os03g04050.1  
Orysa4|Os03g59400.1  
AT2G18470  
Orysa4|Os08g03070.1  
AT5G38990,AT5G39000  
Orysa4|Os07g35004.1  
Orysa4|Os09g39640.1  
Orysa4|Os01g04480.1

Orysa4|Os03g31070.1,Orysa4|Os03g31000.1,Orysa4|Os03g59950.1  
AT5G47850 Orysa4|Os04g35890.1,Orysa4|Os11g11490.1  
AT5G24010  
Orysa4|Os09g16670.1  
AT5G59260,AT5G59270,AT3G46760,AT5G60280,AT3G45440,AT5G60320,AT3G45330,AT3G45410,AT3G45420,AT5  
G60310,AT5G60300,AT3G45430,AT5G60270  
Orysa4|Os09g17010.1  
Orysa4|Os06g12590.1,Orysa4|Os02g50970.1  
AT4G18950,AT3G58760 Orysa4|Os01g54480.1  
AT5G66710,AT3G50730,AT3G50720  
AT2G39660,AT3G55450  
AT4G20790  
Orysa4|Os11g38850.1  
Orysa4|Os06g29340.1  
Orysa4|Os02g32680.1  
Orysa4|Os01g12410.1,Orysa4|Os01g12400.1,Orysa4|Os01g12420.1,Orysa4|Os01g12430.1,Orysa4|Os01  
g12300.1,Orysa4|Os01g12290.1,Orysa4|Os07g36760.1  
Orysa4|Os04g06090.1  
Orysa4|Os01g46030.1  
Orysa4|Os09g27150.1  
AT1G17540,AT1G72760  
AT2G28940  
AT5G01850 Orysa4|Os03g60150.1  
Orysa4|Os10g05170.1  
Orysa4|Os04g23720.1,Orysa4|Os04g23640.1,Orysa4|Os04g23700.1,Orysa4|Os04g23760.1,Orysa4|Os04  
g23600.1,Orysa4|Os01g10700.1,Orysa4|Os06g35850.1  
AT1G53080  
Orysa4|Os01g57100.1  
Orysa4|Os11g19490.1,Orysa4|Os11g47490.1  
Orysa4|Os04g55750.1  
Orysa4|Os09g39620.1  
AT4G35780,AT2G17700  
Orysa4|Os01g57490.1,Orysa4|Os01g57480.1  
AT2G24360,AT4G31170 Orysa4|Os04g51950.1,Orysa4|Os08g12750.1  
AT2G48010 Orysa4|Os01g28730.1  
AT1G80640  
Orysa4|Os07g26180.1  
Orysa4|Os04g12580.1,Orysa4|Os04g12560.1,Orysa4|Os04g12540.1,Orysa4|Os04g12600.1,Orysa4|Os04  
g39930.1  
Orysa4|Os05g51400.1  
AT4G00710,AT1G01740  
Orysa4|Os01g02340.1,Orysa4|Os01g02310.1  
AT5G16500,AT3G02810  
AT5G42120  
AT1G50990 Orysa4|Os09g37790.1  
AT5G03140,AT3G53380 Orysa4|Os05g03450.1  
Orysa4|Os01g40590.1,Orysa4|Os09g19700.1  
AT1G74490  
AT2G18890 Orysa4|Os04g56060.1,Orysa4|Os06g47820.1  
Orysa4|Os08g03100.1,Orysa4|Os08g03160.1,Orysa4|Os08g03020.1,Orysa4|Os08g03090.1,Orysa4|Os08  
g03040.1,Orysa4|Os08g03240.1,Orysa4|Os08g02996.1,Orysa4|Os04g22120.1,Orysa4|Os07g38250.1,Orysa4|Os09g  
16540.1  
AT1G21250,AT1G21240,AT1G21230,AT1G21270,AT1G21210,AT3G25490  
Orysa4|Os01g48000.1,Orysa4|Os01g47900.1,Orysa4|Os01g48020.1,Orysa4|Os01g47810.1,Orysa4|Os01  
g47820.1,Orysa4|Os01g48040.1,Orysa4|Os01g47840.1  
Orysa4|Os03g62700.1  
AT1G51620  
AT1G07870,AT2G28590  
AT5G02800  
AT1G16670 Orysa4|Os12g41710.1  
AT2G46550,AT1G01240 Orysa4|Os09g19890.1,Orysa4|Os08g30930.1  
AT5G09540,AT5G64360,AT1G62970 Orysa4|Os10g23230.1  
AT1G12470 Orysa4|Os08g08060.1  
AT3G56650 Orysa4|Os01g59090.1  
AT4G25170,AT5G61490 Orysa4|Os04g46480.1,Orysa4|Os02g44010.1  
AT5G55570 Orysa4|Os01g55670.1  
Orysa4|Os02g38780.1  
AT4G31860,AT2G25070  
Orysa4|Os06g44210.1  
Orysa4|Os08g33380.1  
AT4G38100 Orysa4|Os09g29080.1  
AT4G01150  
Orysa4|Os02g49870.1,Orysa4|Os06g15400.1  
AT3G56910 Orysa4|Os01g17150.1  
Orysa4|Os01g55310.1  
AT4G21470 Orysa4|Os10g14814.1,Orysa4|Os10g32730.1  
AT3G23805,AT4G13950  
Orysa4|Os03g22440.1,Orysa4|Os01g70690.1,Orysa4|Os01g15320.1,Orysa4|Os12g35670.1,Orysa4|Os01  
g25560.1,Orysa4|Os02g44940.1,Orysa4|Os10g18170.1,Orysa4|Os12g35690.1,Orysa4|Os04g54090.1,Orysa4|Os01g  
10470.1,Orysa4|Os05g11330.1  
AT5G67070  
AT2G33775,AT1G28270,AT3G16570,AT4G15800,AT3G05490,AT1G02900



AT2G38550 Orysa4|Os01g60650.1  
AT1G73740 Orysa4|Os01g33230.1  
AT1G77250 Orysa4|Os01g66070.1  
AT3G60920  
Orysa4|Os02g06720.1  
AT2G45540 Orysa4|Os02g44380.1  
AT1G20830 Orysa4|Os04g49540.1  
AT5G10790 Orysa4|Os04g55360.1  
AT1G67190 Orysa4|Os01g64030.1  
AT4G01160  
Orysa4|Os06g31090.1,Orysa4|Os06g31100.1  
AT3G61600,AT2G46260  
AT2G21600,AT4G39220,AT2G18240  
Orysa4|Os01g01640.1  
AT2G23310 Orysa4|Os08g21760.1  
AT5G22875 Orysa4|Os04g08330.1  
AT5G01660 Orysa4|Os07g35610.1  
Orysa4|Os01g07140.1,Orysa4|Os05g07220.1  
AT3G11000  
Orysa4|Os04g01300.1  
AT3G07950 Orysa4|Os03g24390.1  
Orysa4|Os08g03450.1,Orysa4|Os02g02130.1,Orysa4|Os02g56990.1  
AT1G52300,AT3G16080,AT1G15250  
Orysa4|Os08g40190.1  
AT2G33585  
AT3G05680 Orysa4|Os03g35340.1  
AT5G54500,AT4G27270  
Orysa4|Os05g42190.1,Orysa4|Os01g57570.1  
Orysa4|Os08g04460.1  
AT5G58800  
AT4G36750  
AT1G49980 Orysa4|Os03g42010.1  
AT2G34040,AT1G29030,AT3G19516 Orysa4|Os02g20930.1  
AT3G07300 Orysa4|Os10g25320.1  
Orysa4|Os02g12690.1  
AT4G15440 Orysa4|Os02g02000.1  
AT5G42650 Orysa4|Os03g12500.1  
AT3G19920  
AT5G64230 Orysa4|Os02g51820.1  
AT5G17520 Orysa4|Os04g51330.1  
AT2G25735 Orysa4|Os01g08670.1  
AT3G10985 Orysa4|Os05g27580.1,Orysa4|Os03g18770.1  
AT5G01740 Orysa4|Os05g27590.1  
AT1G11680 Orysa4|Os11g32240.1  
Orysa4|Os05g34380.1,Orysa4|Os02g21810.1,Orysa4|Os07g28140.1,Orysa4|Os07g28110.1,Orysa4|Os07g28160.1,Orysa4|Os07g37980.1,Orysa4|Os05g12040.1,Orysa4|Os07g37970.1  
Orysa4|Os09g34970.1  
AT1G01910  
AT3G47990 Orysa4|Os05g05280.1  
AT4G20760 Orysa4|Os12g41590.1  
AT5G02220 Orysa4|Os08g41980.1  
AT2G28290 Orysa4|Os06g14412.1  
Orysa4|Os06g14406.1  
AT4G01370 Orysa4|Os08g06060.1  
AT1G01560  
AT2G43790 Orysa4|Os06g06090.1  
AT3G59790  
AT4G28980  
AT1G18040,AT1G73690 Orysa4|Os05g32600.1  
AT5G19010 Orysa4|Os05g05160.1,Orysa4|Os11g17080.1  
Orysa4|Os01g45620.1,Orysa4|Os05g50120.1  
Orysa4|Os05g37860.1  
AT5G63610  
Orysa4|Os04g48690.1,Orysa4|Os01g39350.1  
AT2G01450  
AT5G45430,AT4G19110  
AT1G07880  
AT3G54180,AT2G38620  
AT1G10210,AT1G59580 Orysa4|Os06g48590.1  
AT2G42880 Orysa4|Os01g43910.1  
AT1G76540 Orysa4|Os08g40170.1  
Orysa4|Os02g31050.1,Orysa4|Os12g23700.1,Orysa4|Os12g23930.1,Orysa4|Os12g24420.1,Orysa4|Os12g24140.1,Orysa4|Os12g23940.1  
Orysa4|Os02g49040.1  
Orysa4|Os01g59310.1  
Orysa4|Os06g02550.1  
Orysa4|Os03g02680.1,Orysa4|Os03g01850.1,Orysa4|Os02g03060.1  
AT4G36450,AT2G18170  
Orysa4|Os12g30580.1  
AT2G46070  
AT3G45640  
AT4G13020 Orysa4|Os03g63020.1

AT1G53510,AT3G14720,AT4G01595 Orysa4|Os06g26340.1  
Orysa4|Os06g31220.1  
Orysa4|Os03g17700.1  
Orysa4|Os02g29080.1  
AT1G18150,AT1G73670,AT3G18040 Orysa4|Os02g04230.1,Orysa4|Os06g49430.1  
AT4G11330  
Orysa4|Os03g21770.1  
Orysa4|Os02g47220.1  
AT1G49380 Orysa4|Os03g55970.1  
AT4G40020 Orysa4|Os04g37790.1,Orysa4|Os02g36350.1,Orysa4|Os08g37500.1,Orysa4|Os03g08980.1  
AT5G16730,AT3G02930,AT4G27595,AT1G65010  
Orysa4|Os02g24270.1,Orysa4|Os04g50204.1,Orysa4|Os05g02820.1  
AT4G20370,AT1G65480  
Orysa4|Os05g44180.1,Orysa4|Os01g54490.1  
AT2G27550 Orysa4|Os11g05470.1,Orysa4|Os12g05590.1,Orysa4|Os02g32950.1  
AT1G18100 Orysa4|Os06g30370.1  
AT5G62040  
AT5G03840  
Orysa4|Os09g33850.1  
Orysa4|Os12g13030.1,Orysa4|Os11g18870.1  
Orysa4|Os01g02120.1  
Orysa4|Os06g06300.1,Orysa4|Os06g06320.1,Orysa4|Os01g11940.1  
Orysa4|Os01g10590.1,Orysa4|Os02g13830.1  
AT5G46720 Orysa4|Os11g04420.1  
AT3G02910 Orysa4|Os03g63700.1  
AT4G29170 Orysa4|Os09g10850.1  
AT3G17670 Orysa4|Os04g57780.1  
AT4G00070,AT1G36950,AT5G67120,AT5G52140  
Orysa4|Os04g10680.1  
AT5G42940,AT1G45180,AT2G15530,AT4G34040 Orysa4|Os04g55510.1  
Orysa4|Os10g13450.1,Orysa4|Os06g01950.1  
Orysa4|Os06g33800.1  
AT1G08940  
AT3G05170 Orysa4|Os05g04960.1  
AT4G33090 Orysa4|Os09g19800.1,Orysa4|Os08g30810.1,Orysa4|Os02g12650.1  
AT5G44560 Orysa4|Os03g43860.1  
Orysa4|Os07g10480.1  
AT2G06530 Orysa4|Os11g47710.1,Orysa4|Os07g13270.1  
AT1G03950 Orysa4|Os10g33660.1  
Orysa4|Os03g61630.1,Orysa4|Os07g14280.1  
AT3G01340,AT2G30050 Orysa4|Os02g04320.1  
AT4G21820 Orysa4|Os07g33370.1  
AT1G75020,AT3G18850 Orysa4|Os05g42270.1,Orysa4|Os01g57360.1  
AT3G02790,AT5G16470 Orysa4|Os06g49490.1  
AT4G14970 Orysa4|Os07g05960.1  
AT4G28390  
AT5G13490,AT3G08580 Orysa4|Os02g48720.1  
AT5G56450 Orysa4|Os05g46220.1  
Orysa4|Os05g23720.1  
AT5G17400 Orysa4|Os11g43960.1  
AT5G38720  
Orysa4|Os02g49620.1  
AT1G53580 Orysa4|Os01g47690.1  
Orysa4|Os06g36400.1  
AT5G24780,AT5G24770  
AT5G51260,AT4G25150 Orysa4|Os06g04790.1  
AT4G29260,AT4G29270  
Orysa4|Os05g10210.1,Orysa4|Os05g09740.1,Orysa4|Os05g09724.1,Orysa4|Os05g09704.1,Orysa4|Os07g27580.1,Orysa4|Os05g09680.1,Orysa4|Os05g10370.1,Orysa4|Os05g10310.1,Orysa4|Os05g10330.1,Orysa4|Os05g09732.1  
Orysa4|Os01g09540.1  
AT2G38600 Orysa4|Os07g48320.1,Orysa4|Os03g21480.1  
AT1G04040,AT5G44020  
AT2G39920 Orysa4|Os03g38650.1  
AT1G56430,AT1G09240,AT5G56080,AT5G04950 Orysa4|Os03g19420.1,Orysa4|Os03g19436.1  
Orysa4|Os09g15600.1  
AT4G21540 Orysa4|Os01g57350.1,Orysa4|Os07g37580.1  
AT3G05070 Orysa4|Os06g51420.1  
AT3G48500 Orysa4|Os01g67570.1  
AT1G76080 Orysa4|Os07g29410.1  
AT5G20820 Orysa4|Os09g26590.1,Orysa4|Os08g35110.1  
AT3G12955 Orysa4|Os12g41600.1  
AT1G17345,AT1G72430  
AT5G11980 Orysa4|Os12g35290.1  
AT1G55260,AT2G44300,AT2G44290,AT3G58550  
Orysa4|Os07g09970.1,Orysa4|Os03g58940.1,Orysa4|Os03g07100.1  
AT4G02425 Orysa4|Os01g21410.1  
AT3G20420,AT5G45150 Orysa4|Os01g37050.1,Orysa4|Os05g18850.1  
AT4G15417  
Orysa4|Os08g05320.1,Orysa4|Os06g25250.1  
AT3G43920 Orysa4|Os01g68120.1  
AT1G01040 Orysa4|Os03g02970.1

AT1G02090 Orysa4|Os07g30840.1  
AT5G62630,AT1G74790,AT5G39970 Orysa4|Os12g44230.1,Orysa4|Os03g48540.1  
Orysa4|Os07g09520.1  
AT2G32295  
AT5G35730 Orysa4|Os12g40340.1  
Orysa4|Os02g50980.1,Orysa4|Os06g12580.1  
Orysa4|Os07g48420.1  
AT3G29075  
AT3G03290,AT5G17390,AT1G69080,AT2G03720 Orysa4|Os12g31710.1  
AT4G13450 Orysa4|Os03g40130.1  
Orysa4|Os06g44630.1  
AT5G67590  
Orysa4|Os07g39710.1  
AT4G20350 Orysa4|Os10g28410.1  
AT4G11450,AT1G63520 Orysa4|Os03g01550.1,Orysa4|Os10g40324.1  
AT4G33490  
AT1G77480,AT1G44130  
Orysa4|Os11g08180.1  
AT1G49050 Orysa4|Os06g15760.1  
Orysa4|Os11g08190.1,Orysa4|Os11g08100.1,Orysa4|Os12g07780.1,Orysa4|Os11g08200.1  
Orysa4|Os08g07970.1  
Orysa4|Os05g41280.1  
Orysa4|Os02g10140.1,Orysa4|Os06g41100.1,Orysa4|Os09g10840.1  
AT1G58330,AT1G09950 Orysa4|Os01g20030.1  
AT1G68640  
Orysa4|Os01g59350.1,Orysa4|Os01g17260.1  
Orysa4|Os01g65970.1,Orysa4|Os10g41640.1,Orysa4|Os06g15480.1  
AT5G65210,AT5G10030,AT1G22070,AT1G77920 Orysa4|Os04g54474.1  
Orysa4|Os02g10150.1  
AT3G12250,AT5G06950,AT5G06960  
Orysa4|Os08g44900.1  
AT1G08320 Orysa4|Os05g37170.1,Orysa4|Os01g64020.1,Orysa4|Os12g05680.1  
Orysa4|Os03g20310.1,Orysa4|Os07g48820.1  
AT5G06839 Orysa4|Os09g31390.1  
AT5G19470,AT5G19460  
Orysa4|Os09g15340.1  
AT3G02320,AT5G15810 Orysa4|Os10g21360.1  
AT5G01610,AT3G08890,AT5G37070 Orysa4|Os01g38500.1  
AT2G03350 Orysa4|Os03g11210.1  
Orysa4|Os03g18560.1  
AT4G33800 Orysa4|Os03g10260.1  
AT1G23270,AT1G31460 Orysa4|Os06g49680.1  
AT1G48140 Orysa4|Os02g51420.1  
AT3G06455,AT4G01000 Orysa4|Os01g48930.1  
AT5G55200,AT4G26780 Orysa4|Os09g11250.1,Orysa4|Os08g25090.1  
AT3G11397,AT5G05987  
AT5G02040 Orysa4|Os01g62890.1  
AT2G47760 Orysa4|Os01g07720.1  
Orysa4|Os09g24610.1,Orysa4|Os04g44170.1  
AT4G38430 Orysa4|Os09g37270.1  
AT5G02010 Orysa4|Os05g38000.1,Orysa4|Os01g62990.1  
Orysa4|Os01g48410.1,Orysa4|Os05g48640.1,Orysa4|Os01g55520.1  
AT1G79860,AT1G52240,AT3G16130  
AT3G55660,AT5G05940  
AT4G13240,AT3G24620,AT5G19560 Orysa4|Os02g17240.1  
AT1G31650 Orysa4|Os02g47420.1  
AT4G00460,AT1G01700,AT2G45890 Orysa4|Os07g29780.1,Orysa4|Os10g40270.1  
AT3G48080,AT3G48090 Orysa4|Os09g22450.1  
AT2G23390 Orysa4|Os04g36062.1  
AT1G04985 Orysa4|Os04g57330.1  
Orysa4|Os09g39960.1  
Orysa4|Os04g31190.1  
AT5G42080 Orysa4|Os01g48900.1,Orysa4|Os05g48240.1  
AT1G14830,AT2G44590,AT3G60190  
Orysa4|Os10g41820.1  
AT2G14120,AT4G33650 Orysa4|Os01g69130.1  
AT3G61760  
Orysa4|Os03g12810.1  
AT2G25500,AT5G66550 Orysa4|Os03g51479.1  
AT5G42770  
Orysa4|Os11g34850.1  
AT5G09470  
AT3G54110  
Orysa4|Os11g48040.1  
AT5G58970  
AT4G03115 Orysa4|Os12g34870.1  
AT2G22500,AT4G24570 Orysa4|Os08g37370.1,Orysa4|Os09g29050.1  
AT5G19760 Orysa4|Os05g11780.1,Orysa4|Os11g24450.1  
AT1G14140  
AT5G01340 Orysa4|Os03g18160.1  
Orysa4|Os01g74640.1  
AT1G80890,AT1G16000 Orysa4|Os12g36930.1

Orysa4|Os08g17060.1  
AT2G31690,AT1G05800  
Orysa4|Os11g19340.1,Orysa4|Os11g19290.1,Orysa4|Os01g67430.1,Orysa4|Os02g42170.1,Orysa4|Os01  
g67450.1,Orysa4|Os11g27980.1  
AT2G42690  
AT1G30370  
Orysa4|Os06g12700.1  
AT2G30550,AT1G06800 Orysa4|Os05g32380.1  
Orysa4|Os03g39870.1  
AT1G51440  
AT2G44810 Orysa4|Os11g04940.1  
Orysa4|Os05g28150.1  
AT1G06250,AT2G31100,AT4G18550  
Orysa4|Os01g73740.1,Orysa4|Os05g49830.1,Orysa4|Os01g46240.1,Orysa4|Os01g46250.1,Orysa4|Os05  
g49840.1,Orysa4|Os01g46290.1  
Orysa4|Os12g41970.1,Orysa4|Os12g42010.1  
AT4G16820 Orysa4|Os02g43700.1,Orysa4|Os10g41270.1  
Orysa4|Os09g37680.1  
AT1G18190 Orysa4|Os04g55810.1  
AT1G68700,AT1G26140,AT3G25597 Orysa4|Os02g47950.1  
AT1G31335 Orysa4|Os03g56782.1  
AT4G02610,AT3G54640  
Orysa4|Os03g58260.1,Orysa4|Os07g08430.1,Orysa4|Os03g58290.1,Orysa4|Os03g58320.1  
AT3G23130 Orysa4|Os02g01090.1,Orysa4|Os04g08600.1  
AT4G17810  
AT2G37740,AT3G23140,AT2G42410  
AT5G06070 Orysa4|Os04g50070.1,Orysa4|Os07g01180.1,Orysa4|Os11g48000.1  
Orysa4|Os05g20930.1  
AT5G43540 Orysa4|Os03g05490.1,Orysa4|Os05g14130.1,Orysa4|Os07g23450.1  
Orysa4|Os02g57550.1  
AT3G53820,AT3G09290  
AT4G24380 Orysa4|Os04g37710.1  
AT5G65400  
Orysa4|Os07g48770.1  
AT3G19650 Orysa4|Os03g10590.1  
AT4G17830 Orysa4|Os02g46520.1  
AT5G25500 Orysa4|Os11g10110.1  
AT1G28490 Orysa4|Os11g06740.1,Orysa4|Os01g73230.1  
Orysa4|Os07g20170.1,Orysa4|Os10g37670.1  
Orysa4|Os03g60580.1,Orysa4|Os03g60590.1  
AT2G16700,AT4G34970 Orysa4|Os03g13950.1  
AT2G31200 Orysa4|Os03g56790.1,Orysa4|Os12g43340.1  
AT4G25590,AT5G52360,AT4G00680,AT1G01750  
Orysa4|Os04g46910.1,Orysa4|Os02g44470.1,Orysa4|Os07g30090.1  
AT5G59890,AT3G46010,AT3G45990,AT3G46000,AT5G59880  
AT4G33940  
AT1G22510,AT1G72175 Orysa4|Os03g62250.1  
AT1G31910 Orysa4|Os03g14830.1  
Orysa4|Os03g48160.1  
AT3G45740 Orysa4|Os03g17590.1  
AT1G31175Orysa4|Os07g38010.1  
AT1G76240  
Orysa4|Os07g13370.1,Orysa4|Os06g50980.1,Orysa4|Os06g51000.1,Orysa4|Os10g36660.1,Orysa4|Os10  
g36670.1,Orysa4|Os06g51010.1,Orysa4|Os08g39200.1,Orysa4|Os06g47520.1  
AT3G43300 Orysa4|Os07g37750.1  
Orysa4|Os02g10040.1  
AT4G38200,AT4G35380  
Orysa4|Os03g14260.1  
AT1G01960,AT3G60860  
AT3G48110Orysa4|Os06g01400.1  
Orysa4|Os04g30350.1,Orysa4|Os01g19680.1,Orysa4|Os12g24630.1,Orysa4|Os02g26410.1,Orysa4|Os07  
g19230.1,Orysa4|Os05g44850.1  
Orysa4|Os05g12230.1  
Orysa4|Os12g04550.1,Orysa4|Os12g09020.1,Orysa4|Os04g53960.1  
Orysa4|Os04g26970.1,Orysa4|Os08g33610.1  
Orysa4|Os11g23740.1  
Orysa4|Os01g35890.1  
Orysa4|Os07g05340.1  
Orysa4|Os12g37500.1  
Orysa4|Os11g10220.1,Orysa4|Os03g22980.1,Orysa4|Os05g24920.1  
Orysa4|Os03g34110.1  
Orysa4|Os02g07290.1,Orysa4|Os03g36970.1,Orysa4|Os01g23490.1  
Orysa4|Os10g31010.1,Orysa4|Os11g39440.1,Orysa4|Os04g13440.1,Orysa4|Os07g27910.1,Orysa4|Os01  
g37400.1,Orysa4|Os05g19260.1,Orysa4|Os06g12750.1,Orysa4|Os10g14880.1,Orysa4|Os12g21820.1  
Orysa4|Os11g09730.1  
Orysa4|Os02g16920.1  
Orysa4|Os10g14900.1  
AT3G13700 Orysa4|Os06g05800.1  
AT2G42245,AT2G42240 Orysa4|Os06g47300.1  
AT3G21215 Orysa4|Os08g15080.1  
Orysa4|Os01g37837.1,Orysa4|Os03g10190.1  
AT5G27470

AT1G11870  
Orysa4|Os11g39670.1  
AT4G30950  
Orysa4|Os08g34220.1  
AT4G04480,AT4G22030 Orysa4|Os02g13220.1,Orysa4|Os02g13260.1,Orysa4|Os02g13190.1  
Orysa4|Os05g04570.1,Orysa4|Os12g01970.1,Orysa4|Os02g28590.1  
AT3G04780 Orysa4|Os03g58130.1  
AT1G56220 Orysa4|Os03g22270.1  
Orysa4|Os03g09180.1  
AT2G13840  
AT1G73720 Orysa4|Os01g21940.1  
AT2G39800,AT3G55610 Orysa4|Os01g62900.1,Orysa4|Os05g38150.1  
AT5G25450,AT4G32470 Orysa4|Os07g10500.1,Orysa4|Os03g59220.1  
AT5G52860,AT4G25750 Orysa4|Os06g30730.1  
AT2G26910 Orysa4|Os01g08260.1  
Orysa4|Os02g41920.1  
Orysa4|Os02g21350.1  
AT1G53270 Orysa4|Os01g42900.1  
AT2G39350,AT3G55090,AT5G13580,AT3G53510,AT2G37360 Orysa4|Os03g17350.1  
AT2G13610  
AT2G37010  
AT1G15210,AT1G59870,AT3G16340 Orysa4|Os06g36090.1,Orysa4|Os01g52560.1  
AT4G27420  
Orysa4|Os05g02890.1,Orysa4|Os01g61940.1  
AT1G71960 Orysa4|Os11g07600.1  
Orysa4|Os03g17370.1  
AT1G53390  
Orysa4|Os06g24460.1  
AT2G36380,AT1G66950 Orysa4|Os02g21340.1,Orysa4|Os11g37700.1  
AT3G13220  
Orysa4|Os09g16458.1  
AT3G30842 Orysa4|Os09g16449.1,Orysa4|Os09g16380.1,Orysa4|Os09g16290.1  
Orysa4|Os09g16330.1  
AT3G55130,AT3G55110,AT3G55100  
AT3G25620 Orysa4|Os10g13830.1  
AT5G06530,AT3G52310 Orysa4|Os03g06139.1  
AT2G37280,AT3G53480,AT4G15215,AT4G15230,AT4G15233,AT4G15236  
Orysa4|Os12g13720.1,Orysa4|Os02g32690.1  
Orysa4|Os12g13730.1  
Orysa4|Os10g30610.1  
Orysa4|Os12g32820.1  
Orysa4|Os02g37100.1,Orysa4|Os07g04660.1  
AT1G15520  
Orysa4|Os01g42410.1,Orysa4|Os01g24010.1,Orysa4|Os01g42350.1,Orysa4|Os01g42370.1,Orysa4|Os01g42380.1,Orysa4|Os08g29570.1  
AT5G60740 Orysa4|Os06g51460.1,Orysa4|Os11g22350.1  
Orysa4|Os04g11820.1  
Orysa4|Os08g43120.1  
AT2G29940  
AT5G19410  
AT1G31770 Orysa4|Os08g07010.1  
AT2G01320 Orysa4|Os01g03144.1  
Orysa4|Os01g60270.1  
AT4G35550  
AT1G20700,AT1G20710  
AT3G56140,AT2G40400 Orysa4|Os05g39680.1  
AT3G60810 Orysa4|Os03g64140.1  
AT5G06130  
AT5G61670 Orysa4|Os02g43500.1  
AT3G57220,AT2G41490  
Orysa4|Os07g46640.1  
AT2G39020,AT2G39030 Orysa4|Os03g05710.1  
AT3G18790 Orysa4|Os02g39050.1  
Orysa4|Os11g05770.1,Orysa4|Os12g06150.1  
AT5G04820  
Orysa4|Os04g58820.1,Orysa4|Os04g33870.1,Orysa4|Os08g01190.1,Orysa4|Os01g64410.1,Orysa4|Os05g36990.1  
AT3G52540,AT2G36050,AT3G52550 Orysa4|Os01g40970.1  
AT5G64940  
AT3G07700 Orysa4|Os09g07660.1  
AT1G65950 Orysa4|Os11g34750.1  
AT2G29530 Orysa4|Os07g13950.1  
Orysa4|Os03g61270.1  
AT5G01930 Orysa4|Os05g25480.1  
Orysa4|Os02g52800.1  
AT3G30540,AT3G10900,AT3G10890  
AT5G66460 Orysa4|Os01g47400.1  
AT1G02310  
Orysa4|Os11g02600.1,Orysa4|Os12g02520.1  
AT2G20680,AT4G28320 Orysa4|Os01g54300.1  
AT1G50300 Orysa4|Os07g19560.1,Orysa4|Os09g12800.1

AT3G11150 Orysa4|Os01g61440.1  
Orysa4|Os11g39130.1  
AT1G11020 Orysa4|Os01g42500.1  
AT2G22120  
AT1G50440 Orysa4|Os02g03950.1  
AT2G19260 Orysa4|Os04g34720.1  
AT5G01280,AT3G09000,AT2G38160 Orysa4|Os01g19420.1  
AT2G40070 Orysa4|Os01g04880.1  
AT1G03760 Orysa4|Os01g70330.1  
Orysa4|Os02g43300.1,Orysa4|Os10g37240.1,Orysa4|Os02g23920.1,Orysa4|Os08g17100.1,Orysa4|Os03  
g02240.1  
AT3G10000,AT5G03680  
Orysa4|Os02g01380.1  
AT5G47660  
AT5G28300  
AT1G33240,AT1G76880,AT1G76890  
AT2G26830 Orysa4|Os09g26700.1  
AT1G74320,AT1G71697,AT4G09760 Orysa4|Os01g51920.1,Orysa4|Os05g45880.1,Orysa4|Os01g08760.1  
AT5G53560 Orysa4|Os10g37420.1  
Orysa4|Os12g12170.1  
AT2G32720  
AT2G46650 Orysa4|Os02g43360.1  
Orysa4|Os01g73990.1,Orysa4|Os05g01820.1  
AT5G48810  
AT1G26340,AT1G60660  
AT1G17890,AT1G73250 Orysa4|Os06g44270.1  
Orysa4|Os06g44260.1  
Orysa4|Os03g49430.1  
AT1G54590,AT1G03140 Orysa4|Os07g38420.1  
AT2G32100,AT1G05420,AT4G14860 Orysa4|Os10g29610.1,Orysa4|Os03g06350.1  
AT5G50375 Orysa4|Os11g19700.1  
AT5G53400,AT4G27890  
Orysa4|Os06g12530.1,Orysa4|Os02g51000.1  
AT3G22550,AT3G63210 Orysa4|Os03g46260.1  
Orysa4|Os01g52100.1  
Orysa4|Os01g41010.1  
Orysa4|Os07g07900.1,Orysa4|Os10g28680.1,Orysa4|Os03g53520.1,Orysa4|Os05g08800.1,Orysa4|Os01  
g08520.1  
Orysa4|Os03g15430.1  
AT3G03305 Orysa4|Os07g17280.1,Orysa4|Os01g66920.1  
AT1G30845 Orysa4|Os03g03530.1  
AT4G13040  
Orysa4|Os02g29550.1  
Orysa4|Os04g55690.1  
AT1G59840  
AT4G27110,AT3G20580 Orysa4|Os06g47110.1  
AT3G16860,AT4G16120,AT5G49270  
Orysa4|Os07g49080.1,Orysa4|Os03g18910.1  
AT1G53710 Orysa4|Os03g27950.1  
AT2G39080 Orysa4|Os01g26970.1,Orysa4|Os01g26852.1,Orysa4|Os01g26920.1  
AT5G66055 Orysa4|Os03g04300.1  
AT5G40160 Orysa4|Os06g13000.1  
AT5G26760 Orysa4|Os05g04370.1  
AT3G13570,AT1G55310 Orysa4|Os07g43950.1,Orysa4|Os03g25770.1  
AT5G18810 Orysa4|Os03g24890.1  
Orysa4|Os11g47830.1  
AT3G10400  
AT3G55460 Orysa4|Os12g38430.1,Orysa4|Os02g15310.1  
Orysa4|Os02g27000.1  
AT1G19100  
Orysa4|Os11g26830.1  
Orysa4|Os01g36840.1  
AT4G24970,AT5G50780  
AT5G13130  
AT4G36290,AT4G36280,AT4G36270  
Orysa4|Os04g24550.1  
AT1G55790,AT1G55800,AT5G56060,AT5G25030,AT5G56075 Orysa4|Os09g30210.1,Orysa4|Os09g30200.1  
AT3G56840 Orysa4|Os01g59490.1  
AT5G35338,AT5G35330 Orysa4|Os09g32090.1  
Orysa4|Os06g48870.1  
AT5G66290 Orysa4|Os03g51700.1  
AT5G13470 Orysa4|Os01g71262.1  
AT5G57020  
AT2G44175 Orysa4|Os01g51170.1  
AT1G06570  
Orysa4|Os02g07160.1  
AT2G39450 Orysa4|Os05g38670.1,Orysa4|Os01g62070.1  
Orysa4|Os03g12530.1,Orysa4|Os02g53490.1  
AT1G16310,AT1G79520 Orysa4|Os01g03914.1  
AT3G58060  
Orysa4|Os06g48780.1,Orysa4|Os01g13080.1  
AT4G25890,AT5G57290

AT5G37480 Orysa4|Os03g53740.1  
AT4G26900 Orysa4|Os03g15120.1  
Orysa4|Os03g54230.1  
AT3G57440 Orysa4|Os07g46290.1  
AT2G42620 Orysa4|Os06g06050.1  
AT1G60600 Orysa4|Os03g09060.1  
AT2G19430 Orysa4|Os09g19900.1  
AT1G67580  
AT4G10010,AT1G33770  
AT3G05050 Orysa4|Os12g23950.1  
AT3G01085,AT5G39420 Orysa4|Os11g24210.1,Orysa4|Os08g36600.1  
Orysa4|Os01g67160.1  
AT1G53050 Orysa4|Os10g42950.1  
Orysa4|Os05g40540.1  
AT5G44290,AT1G03740,AT4G22940 Orysa4|Os02g39010.1,Orysa4|Os04g41100.1  
AT1G66750 Orysa4|Os06g47880.1,Orysa4|Os10g06770.1  
AT1G54610 Orysa4|Os01g27020.1,Orysa4|Os01g26864.1,Orysa4|Os07g47180.1,Orysa4|Os03g22700.1  
AT1G71530  
AT1G18670,AT1G74330 Orysa4|Os07g40550.1  
AT3G48750 Orysa4|Os05g32360.1,Orysa4|Os01g72790.1  
AT1G20930  
AT5G10270,AT5G64960 Orysa4|Os12g10190.1,Orysa4|Os11g13860.1,Orysa4|Os02g35300.1  
Orysa4|Os12g38860.1  
AT5G63370  
AT1G09600,AT1G57700 Orysa4|Os01g70130.1  
AT5G50860 Orysa4|Os02g29070.1  
Orysa4|Os02g20140.1  
AT2G46590,AT3G61850,AT4G24060,AT1G64620 Orysa4|Os01g55340.1  
AT5G02460,AT2G37590,AT2G28810,AT1G07640 Orysa4|Os02g47810.1  
AT5G62940 Orysa4|Os02g15350.1  
AT5G66940,AT3G50410 Orysa4|Os05g36900.1,Orysa4|Os01g64590.1  
AT1G21340  
AT1G28310  
AT1G26790,AT1G69570  
AT3G45610,AT5G60200,AT2G28510 Orysa4|Os01g48290.1  
AT1G47655 Orysa4|Os06g17410.1,Orysa4|Os02g49440.1,Orysa4|Os09g29960.1,Orysa4|Os08g38220.1  
AT5G65590,AT4G38000  
AT3G55370 Orysa4|Os07g48570.1,Orysa4|Os01g15900.1  
AT3G52440 Orysa4|Os03g55610.1  
AT5G60850 Orysa4|Os10g26620.1,Orysa4|Os03g07360.1  
Orysa4|Os01g09720.1,Orysa4|Os05g02150.1,Orysa4|Os10g35300.1,Orysa4|Os07g32510.1,Orysa4|Os04g58190.1  
Orysa4|Os03g60630.1,Orysa4|Os07g13260.1,Orysa4|Os03g16850.1,Orysa4|Os12g38200.1  
Orysa4|Os12g39990.1,Orysa4|Os03g42200.1  
AT5G62430,AT3G47500,AT5G39660 Orysa4|Os03g38870.1  
AT3G21270,AT1G51700  
AT2G34140,AT1G29160,AT4G21030,AT4G21050,AT4G21080,AT4G21040,AT4G00940  
AT2G43110 Orysa4|Os04g28060.1  
AT3G29636 Orysa4|Os04g54550.1  
AT3G29690,AT1G03940 Orysa4|Os02g57480.1,Orysa4|Os07g23150.1,Orysa4|Os06g05310.1,Orysa4|Os06g05320.1,Orysa4|Os06g05300.1,Orysa4|Os06g05284.1,Orysa4|Os08g07730.1,Orysa4|Os04g54570.1,Orysa4|Os08g07720.1,Orysa4|Os03g28910.1,Orysa4|Os10g26290.1,Orysa4|Os04g12820.1,Orysa4|Os01g18620.1,Orysa4|Os02g18780.1  
AT5G39090,AT5G39080,AT5G39050,AT5G61160,AT3G29680,AT3G29635,AT3G29720,AT3G29670,AT3G29590  
AT2G46455,AT2G46470,AT5G62050,AT1G44890 Orysa4|Os03g02480.1,Orysa4|Os10g37690.1  
AT1G20410 Orysa4|Os04g47380.1  
AT1G22790,AT1G34010 Orysa4|Os05g51370.1,Orysa4|Os01g40700.1  
AT1G18740,AT1G43630,AT1G74450 Orysa4|Os04g59140.1  
Orysa4|Os12g06780.1,Orysa4|Os11g06440.1  
AT4G11300,AT4G23530,AT1G63930 Orysa4|Os02g01930.1  
AT1G22940 Orysa4|Os12g09000.1  
Orysa4|Os01g13300.1  
Orysa4|Os03g08620.1  
AT5G58280 Orysa4|Os05g40280.1  
AT5G42700,AT3G19184

Orysa4|Os06g09420.1  
AT1G16900 Orysa4|Os01g11070.1  
AT2G04650  
AT1G74910 Orysa4|Os03g11050.1  
Orysa4|Os02g03260.1  
AT4G13430  
AT1G58643,AT1G58936,AT1G59312,AT1G59171,AT1G22100,AT5G42810 Orysa4|Os04g56580.1  
Orysa4|Os03g08660.1,Orysa4|Os03g10050.1  
AT2G17640,AT4G35640  
AT5G56760 Orysa4|Os05g45710.1,Orysa4|Os01g52260.1,Orysa4|Os02g10830.1  
AT1G55920,AT3G13110  
Orysa4|Os03g04140.1  
Orysa4|Os06g14200.1,Orysa4|Os02g43320.1  
AT2G38220,AT2G38185,AT5G01450 Orysa4|Os05g44550.1  
AT3G03460,AT5G17510 Orysa4|Os12g27994.1  
AT3G06150,AT5G19060 Orysa4|Os05g32960.1  
AT4G23010 Orysa4|Os03g02670.1  
AT1G12600  
AT5G06265 Orysa4|Os07g14650.1,Orysa4|Os03g62030.1  
AT5G22280,AT3G44280 Orysa4|Os02g33290.1  
AT5G51330 Orysa4|Os12g42820.1,Orysa4|Os12g42830.1,Orysa4|Os03g44760.1  
Orysa4|Os04g47190.1  
AT1G50110,AT1G50090,AT3G19710 Orysa4|Os03g12890.1  
AT1G10070,AT1G10060  
AT3G49680,AT5G65780 Orysa4|Os10g40200.1,Orysa4|Os05g48450.1,Orysa4|Os03g01600.1  
AT5G17460 Orysa4|Os01g03500.1  
AT5G23680,AT3G48800 Orysa4|Os12g29480.1,Orysa4|Os03g63320.1  
AT3G22110  
Orysa4|Os06g07978.1,Orysa4|Os06g07878.1,Orysa4|Os06g07140.1  
Orysa4|Os07g28590.1  
AT2G27020 Orysa4|Os01g59600.1  
AT1G78780 Orysa4|Os01g53090.1,Orysa4|Os01g53110.1  
Orysa4|Os01g14550.1,Orysa4|Os01g14590.1  
AT5G51795,AT1G55460 Orysa4|Os03g37330.1  
AT1G06110,Orysa4|Os11g16330.1,Orysa4|Os11g16390.1  
AT2G33740 Orysa4|Os03g08800.1,Orysa4|Os10g23204.1  
Orysa4|Os10g42400.1  
AT5G27740 Orysa4|Os03g57870.1  
Orysa4|Os12g16200.1  
AT5G27380 Orysa4|Os11g42350.1,Orysa4|Os12g34380.1  
AT5G59750 Orysa4|Os05g38570.1  
AT5G64300,AT2G22450 Orysa4|Os02g36340.1  
AT5G49190  
AT1G73370,AT5G37180 Orysa4|Os04g24430.1,Orysa4|Os02g58480.1  
AT5G20830,AT3G43190 Orysa4|Os07g42490.1,Orysa4|Os03g28330.1,Orysa4|Os06g09450.1  
AT4G02280 Orysa4|Os03g22120.1  
Orysa4|Os02g06860.1  
Orysa4|Os12g10540.1  
AT5G23260,AT1G31140  
AT2G03710  
AT4G09960,AT4G18960,AT2G42830,AT3G58780 Orysa4|Os01g10504.1  
AT3G30260  
AT3G61120,AT2G45650  
Orysa4|Os05g23780.1,Orysa4|Os08g20460.1,Orysa4|Os06g22760.1  
Orysa4|Os06g01910.1  
AT3G57230,AT2G22630,AT4G37940 Orysa4|Os04g38770.1,Orysa4|Os02g36924.1,Orysa4|Os02g49840.1  
Orysa4|Os12g21850.1,Orysa4|Os06g30810.1,Orysa4|Os06g22540.1,Orysa4|Os09g02830.1,Orysa4|Os01g74440.1,Orysa4|Os09g02780.1  
AT1G71692 Orysa4|Os08g02070.1,Orysa4|Os12g10520.1  
AT2G26320  
AT3G54340  
AT2G14210  
Orysa4|Os07g41370.1,Orysa4|Os12g31748.1,Orysa4|Os03g03070.1,Orysa4|Os06g23980.1,Orysa4|Os04g38780.1,Orysa4|Os02g20680.1  
Orysa4|Os06g49840.1  
Orysa4|Os06g45650.1,Orysa4|Os02g07430.1,Orysa4|Os04g52410.1  
AT1G69120,AT1G26310,AT5G60910 Orysa4|Os07g01820.1,Orysa4|Os03g54160.1  
Orysa4|Os06g06750.1,Orysa4|Os03g11614.1  
Orysa4|Os04g23910.1  
AT3G57390,AT5G13790  
Orysa4|Os08g33488.1  
AT5G65050,AT5G65060,AT1G77080,AT5G65080,AT5G65070,AT5G10140  
Orysa4|Os06g23950.1  
AT3G02310,AT5G15800,AT1G24260 Orysa4|Os08g41950.1,Orysa4|Os09g32948.1  
AT1G65360,AT1G01530,AT5G60440,AT4G36590,AT2G24840,AT3G04100,AT3G66656,AT2G34440,AT5G46320,AT1G47760,AT1G17310,AT1G72350  
Orysa4|Os01g69850.1,Orysa4|Os08g41960.1,Orysa4|Os03g03100.1  
AT5G20240 Orysa4|Os01g66030.1  
Orysa4|Os02g45770.1,Orysa4|Os04g49150.1  
AT5G62165,AT2G45660,AT4G11880,AT4G22950,AT5G51860,AT5G51870 Orysa4|Os10g39130.1  
AT2G22540,AT4G24540 Orysa4|Os06g11330.1,Orysa4|Os02g52340.1,Orysa4|Os03g08754.1  
Orysa4|Os05g11380.1,Orysa4|Os05g11414.1



AT4G13100,AT3G25030,AT4G03965,AT4G22250,AT1G62370 Orysa4|Os01g68900.1  
AT3G07120 Orysa4|Os03g12850.1,Orysa4|Os09g32730.1  
AT4G18540 Orysa4|Os01g42760.1  
AT1G51730 Orysa4|Os01g37770.1  
Orysa4|Os02g57630.1  
AT5G16310 Orysa4|Os02g08370.1  
AT1G65650  
AT3G27240,AT5G40810 Orysa4|Os05g23620.1  
AT1G05970 Orysa4|Os04g59340.1,Orysa4|Os09g02400.1,Orysa4|Os02g44890.1,Orysa4|Os07g15270.1  
Orysa4|Os07g31940.1  
AT5G44760,AT4G20080  
AT5G12970  
AT1G51570,AT3G57880 Orysa4|Os05g30750.1  
AT5G17980  
AT1G04150 Orysa4|Os02g57090.1  
AT3G61300,AT4G00700  
AT5G06850,AT5G48060 Orysa4|Os06g41090.1  
AT3G03680 Orysa4|Os03g44890.1  
AT1G22610 Orysa4|Os04g59520.1,Orysa4|Os05g35480.1  
Orysa4|Os04g39680.1  
AT5G03435,AT3G61720  
Orysa4|Os12g08670.1  
AT4G11610 Orysa4|Os04g58720.1  
Orysa4|Os02g44490.1,Orysa4|Os07g30020.1  
AT1G74720 Orysa4|Os01g40480.1  
AT5G63620 Orysa4|Os08g01760.1  
Orysa4|Os11g10520.1,Orysa4|Os11g10510.1,Orysa4|Os11g10480.1  
AT5G43940 Orysa4|Os02g57040.1  
AT1G32780 Orysa4|Os10g07229.1  
AT1G22430,AT4G22110,AT1G22440,AT5G42250  
Orysa4|Os03g08999.1,Orysa4|Os03g09020.1,Orysa4|Os07g42924.1  
AT1G77120  
AT1G64710  
AT5G24760 Orysa4|Os02g42520.1  
AT5G14520 Orysa4|Os03g49210.1  
AT1G48270 Orysa4|Os06g09930.1  
AT3G58990,AT2G43100,AT2G43090 Orysa4|Os02g43830.1  
AT3G03210 Orysa4|Os10g39400.1  
AT4G20930 Orysa4|Os06g46372.1  
Orysa4|Os02g39830.1  
AT5G10810  
AT3G06210,AT5G18980,AT4G14280  
Orysa4|Os03g24820.1,Orysa4|Os03g24730.1,Orysa4|Os01g33930.1,Orysa4|Os01g34010.1,Orysa4|Os01  
g33869.1,Orysa4|Os11g39400.1,Orysa4|Os01g34000.1,Orysa4|Os10g36260.1,Orysa4|Os12g32930.1,Orysa4|Os12g  
34360.1,Orysa4|Os07g45370.1  
AT5G06180  
AT5G22350 Orysa4|Os04g33770.1,Orysa4|Os02g33230.1  
AT3G07370 Orysa4|Os08g02140.1  
Orysa4|Os05g01460.1  
AT3G12150 Orysa4|Os02g10160.1  
Orysa4|Os08g34690.1  
Orysa4|Os04g25520.1  
Orysa4|Os01g50340.1  
Orysa4|Os08g08240.1,Orysa4|Os04g53660.1,Orysa4|Os01g23410.1,Orysa4|Os12g33640.1,Orysa4|Os12  
g25520.1,Orysa4|Os03g60730.1  
Orysa4|Os04g25210.1,Orysa4|Os01g26868.1,Orysa4|Os04g46690.1,Orysa4|Os07g28760.1,Orysa4|Os01  
g43010.1,Orysa4|Os06g18860.1,Orysa4|Os01g60100.1,Orysa4|Os04g01110.1,Orysa4|Os01g18650.1,Orysa4|Os02g  
08340.1,Orysa4|Os02g55620.1,Orysa4|Os08g39520.1,Orysa4|Os04g09410.1  
Orysa4|Os04g43090.1,Orysa4|Os12g29970.1  
AT5G56260  
Orysa4|Os05g12780.1,Orysa4|Os03g15830.1,Orysa4|Os06g37760.1,Orysa4|Os08g25660.1,Orysa4|Os06  
g24530.1,Orysa4|Os01g58830.1,Orysa4|Os03g36550.1,Orysa4|Os12g15440.1,Orysa4|Os12g28110.1,Orysa4|Os03g  
09830.1,Orysa4|Os09g01300.1,Orysa4|Os02g56350.1,Orysa4|Os05g14160.1  
Orysa4|Os01g52460.1,Orysa4|Os02g52430.1  
Orysa4|Os08g37120.1,Orysa4|Os10g12140.1,Orysa4|Os06g10740.1,Orysa4|Os03g14600.1,Orysa4|Os04  
g03000.1,Orysa4|Os07g34230.1,Orysa4|Os02g25950.1,Orysa4|Os01g19210.1,Orysa4|Os01g14190.1,Orysa4|Os10g  
14230.1,Orysa4|Os06g29630.1,Orysa4|Os03g38450.1,Orysa4|Os03g28950.1,Orysa4|Os05g25800.1,Orysa4|Os05g5  
1300.1,Orysa4|Os10g02910.1,Orysa4|Os11g39940.1,Orysa4|Os03g31110.1  
Orysa4|Os05g14940.1,Orysa4|Os03g52310.1,Orysa4|Os05g50624.1,Orysa4|Os05g50640.1,Orysa4|Os01  
g33410.1  
AT3G02770,AT5G16450  
Orysa4|Os05g13590.1,Orysa4|Os08g17850.1  
Orysa4|Os02g52450.1  
AT1G18560 Orysa4|Os01g02100.1  
Orysa4|Os01g27030.1,Orysa4|Os09g11840.1,Orysa4|Os03g06850.1,Orysa4|Os03g42920.1  
Orysa4|Os03g32330.1,Orysa4|Os11g18220.1  
Orysa4|Os11g14470.1,Orysa4|Os04g01100.1  
Orysa4|Os02g48310.1,Orysa4|Os10g08970.1,Orysa4|Os10g34860.1,Orysa4|Os02g26120.1,Orysa4|Os06  
g40290.1,Orysa4|Os09g02890.1,Orysa4|Os10g30680.1,Orysa4|Os02g32170.1,Orysa4|Os02g14250.1,Orysa4|Os02g  
10280.1  
Orysa4|Os08g09810.1,Orysa4|Os08g09800.1,Orysa4|Os08g09880.1  
Orysa4|Os05g30590.1

AT5G04140,AT2G41220 Orysa4|Os07g46460.1  
AT5G53460 Orysa4|Os05g48200.1,Orysa4|Os01g48960.1  
Orysa4|Os08g09260.1  
AT2G33840,AT1G28350  
Orysa4|Os02g49030.1,Orysa4|Os04g58400.1  
Orysa4|Os07g47860.1  
Orysa4|Os08g23110.1,Orysa4|Os08g05490.1  
AT5G17620 Orysa4|Os01g64920.1  
AT4G00560 Orysa4|Os02g57990.1  
AT3G58390,AT4G27650 Orysa4|Os04g56480.1  
AT2G12550 Orysa4|Os04g55150.1  
AT5G67390  
Orysa4|Os12g39100.1,Orysa4|Os03g40770.1,Orysa4|Os03g55400.1,Orysa4|Os03g32790.1,Orysa4|Os12  
g32360.1  
AT2G25340,AT4G32150,AT5G11150  
Orysa4|Os03g58840.1,Orysa4|Os07g09600.1  
AT3G24890 Orysa4|Os03g06960.1  
Orysa4|Os02g55990.1,Orysa4|Os06g07780.1  
AT2G32670,AT1G04760,AT2G33110,AT2G33120,AT1G04750  
Orysa4|Os12g44250.1  
AT3G54300 Orysa4|Os08g44430.1  
AT5G22360  
AT4G15780 Orysa4|Os07g14540.1  
AT2G27680  
Orysa4|Os09g39390.1  
AT5G05680 Orysa4|Os04g51900.1  
Orysa4|Os01g65310.1,Orysa4|Os05g35570.1  
AT2G21120,AT4G38730  
Orysa4|Os05g43790.1  
Orysa4|Os11g09140.1  
AT4G09640,AT1G34470,AT1G71900 Orysa4|Os01g65986.1,Orysa4|Os05g35060.1  
AT4G13800,AT3G23870 Orysa4|Os02g29510.1,Orysa4|Os04g30450.1  
AT3G56810 Orysa4|Os03g20350.1  
AT3G03140 Orysa4|Os02g47170.1  
AT3G15820,AT3G15830 Orysa4|Os06g40500.1  
AT5G06610 Orysa4|Os10g27110.1,Orysa4|Os03g07120.1  
AT1G79420  
Orysa4|Os01g01500.1,Orysa4|Os10g27120.1  
AT5G66740,AT1G75160,AT5G05840,AT3G55720 Orysa4|Os05g16300.1,Orysa4|Os03g16060.1  
AT1G49840,AT3G19540,AT1G27690 Orysa4|Os12g39160.1,Orysa4|Os03g40930.1,Orysa4|Os07g40150.1  
AT4G18390,AT1G30210 Orysa4|Os03g57190.1  
AT5G08070,AT5G60970,AT3G02150 Orysa4|Os01g55750.1  
Orysa4|Os08g33530.1  
Orysa4|Os12g02090.1,Orysa4|Os07g04510.1,Orysa4|Os02g51310.1,Orysa4|Os10g13900.1,Orysa4|Os12  
g42190.1  
AT2G17630,AT4G35630 Orysa4|Os03g06200.1  
AT5G23050 Orysa4|Os09g21230.1  
AT1G55320  
AT5G02080,AT1G12350 Orysa4|Os08g07880.1,Orysa4|Os02g36550.1  
AT4G23100 Orysa4|Os05g03820.1,Orysa4|Os07g27790.1  
Orysa4|Os01g26000.1  
AT1G54570 Orysa4|Os01g25990.1,Orysa4|Os01g26039.1  
AT5G41120,AT5G41130,AT3G26820,AT3G26840,AT3G02030 Orysa4|Os09g33530.1  
Orysa4|Os06g01350.1,Orysa4|Os07g04970.1  
Orysa4|Os08g01960.1,Orysa4|Os08g01950.1,Orysa4|Os08g02030.1,Orysa4|Os08g02020.1,Orysa4|Os04  
g30570.1,Orysa4|Os08g01980.1  
Orysa4|Os04g30600.1  
AT2G39980,AT5G01210 Orysa4|Os05g37660.1,Orysa4|Os01g63480.1  
AT3G50280,AT3G50300,AT5G38130,AT3G50270,AT5G67150,AT5G67160  
AT5G23940 Orysa4|Os08g44840.1  
Orysa4|Os08g01970.1  
AT5G07860,AT5G07870,AT5G07850,AT5G42830  
Orysa4|Os11g44580.1  
Orysa4|Os11g45620.1,Orysa4|Os04g53000.1  
AT3G46530,AT3G46730,AT3G46710  
Orysa4|Os04g30660.1,Orysa4|Os04g30690.1  
Orysa4|Os06g30430.1  
Orysa4|Os06g48990.1  
Orysa4|Os05g34230.1  
Orysa4|Os12g30590.1  
Orysa4|Os12g10390.1  
Orysa4|Os05g12570.1,Orysa4|Os06g15750.1  
Orysa4|Os07g33690.1  
Orysa4|Os04g11430.1  
Orysa4|Os08g19694.1  
Orysa4|Os02g18140.1  
AT3G26470  
Orysa4|Os08g16450.1,Orysa4|Os02g27540.1  
Orysa4|Os07g31800.1  
Orysa4|Os05g41310.1,Orysa4|Os05g41290.1  
AT3G14470  
Orysa4|Os08g42930.1,Orysa4|Os08g43050.1,Orysa4|Os08g43010.1,Orysa4|Os08g43000.1,Orysa4|Os05

g31570.1,Orysa4|Os05g31530.1,Orysa4|Os05g31550.1,Orysa4|Os01g25810.1,Orysa4|Os01g25760.1,Orysa4|Os01g25630.1,Orysa4|Os03g63200.1,Orysa4|Os03g63150.1,Orysa4|Os10g04090.1,Orysa4|Os10g04060.1,Orysa4|Os10g04120.1,Orysa4|Os01g25740.1  
Orysa4|Os10g36270.1  
Orysa4|Os04g53060.1,Orysa4|Os12g10360.1  
Orysa4|Os11g11900.1  
Orysa4|Os01g35300.1,Orysa4|Os11g15670.1  
Orysa4|Os11g29110.1  
Orysa4|Os06g41480.1,Orysa4|Os04g02110.1,Orysa4|Os01g57340.1,Orysa4|Os01g57310.1,Orysa4|Os01g57280.1,Orysa4|Os11g35210.1,Orysa4|Os05g30220.1,Orysa4|Os02g04530.1,Orysa4|Os04g25900.1,Orysa4|Os04g02030.1,Orysa4|Os04g30930.1,Orysa4|Os02g30150.1,Orysa4|Os12g10180.1,Orysa4|Os12g10710.1,Orysa4|Os06g20050.1,Orysa4|Os12g32660.1,Orysa4|Os12g32680.1,Orysa4|Os12g32790.1,Orysa4|Os12g32710.1,Orysa4|Os02g16330.1,Orysa4|Os02g16270.1,Orysa4|Os01g02250.1,Orysa4|Os10g03670.1,Orysa4|Os06g49420.1,Orysa4|Os06g49380.1,Orysa4|Os12g29690.1,Orysa4|Os12g29710.1,Orysa4|Os07g04900.1,Orysa4|Os11g24170.1,Orysa4|Os08g19980.1,Orysa4|Os08g20000.1,Orysa4|Os11g29520.1,Orysa4|Os04g52970.1,Orysa4|Os02g02640.1,Orysa4|Os02g02670.1,Orysa4|Os04g53030.1,Orysa4|Os04g22090.1  
Orysa4|Os02g16100.1,Orysa4|Os12g32670.1,Orysa4|Os09g20030.1,Orysa4|Os02g16260.1  
Orysa4|Os03g26260.1  
Orysa4|Os06g17900.1,Orysa4|Os06g17920.1,Orysa4|Os06g17880.1,Orysa4|Os06g03500.1,Orysa4|Os06g05359.1  
AT1G10920 Orysa4|Os11g10620.1  
Orysa4|Os06g17950.1  
Orysa4|Os02g18070.1  
Orysa4|Os02g16060.1  
Orysa4|Os02g38392.1  
Orysa4|Os07g33740.1  
Orysa4|Os11g10610.1,Orysa4|Os11g10550.1,Orysa4|Os01g71100.1,Orysa4|Os06g43670.1,Orysa4|Os09g15850.1,Orysa4|Os09g16000.1,Orysa4|Os03g37720.1  
Orysa4|Os01g33684.1  
Orysa4|Os04g30530.1  
Orysa4|Os11g45130.1  
Orysa4|Os02g20210.1  
Orysa4|Os11g17014.1,Orysa4|Os01g70080.1  
Orysa4|Os11g45600.1  
Orysa4|Os11g41540.1  
Orysa4|Os06g17890.1  
Orysa4|Os01g72390.1  
Orysa4|Os06g49360.1  
Orysa4|Os09g34150.1  
Orysa4|Os02g20460.1  
Orysa4|Os01g08370.1  
Orysa4|Os04g53050.1,Orysa4|Os11g12020.1  
Orysa4|Os04g30540.1,Orysa4|Os06g37810.1  
AT5G38900  
Orysa4|Os12g03080.1  
Orysa4|Os09g14490.1,Orysa4|Os04g43340.1  
Orysa4|Os03g38330.1,Orysa4|Os03g38250.1,Orysa4|Os11g29970.1,Orysa4|Os11g29990.1,Orysa4|Os11g30060.1,Orysa4|Os11g30210.1,Orysa4|Os11g29980.1,Orysa4|Os11g29920.1  
Orysa4|Os07g10560.1  
Orysa4|Os12g29280.1,Orysa4|Os12g29290.1,Orysa4|Os10g07400.1  
Orysa4|Os11g45190.1,Orysa4|Os11g45060.1,Orysa4|Os11g45090.1,Orysa4|Os11g44960.1,Orysa4|Os11g45180.1,Orysa4|Os11g44990.1,Orysa4|Os11g40780.1,Orysa4|Os11g45160.1,Orysa4|Os11g44970.1,Orysa4|Os08g15880.1,Orysa4|Os11g13940.1,Orysa4|Os09g11020.1,Orysa4|Os01g05620.1,Orysa4|Os01g05600.1,Orysa4|Os08g24380.1,Orysa4|Os02g25900.1,Orysa4|Os05g12770.1,Orysa4|Os03g48370.1,Orysa4|Os05g16200.1,Orysa4|Os11g47780.1,Orysa4|Os11g28950.1,Orysa4|Os09g13820.1,Orysa4|Os09g14450.1,Orysa4|Os07g29820.1,Orysa4|Os10g33440.1,Orysa4|Os09g14410.1,Orysa4|Os07g29810.1  
Orysa4|Os08g32890.1,Orysa4|Os08g32880.1  
Orysa4|Os01g25720.1,Orysa4|Os11g12350.1  
Orysa4|Os03g36920.1,Orysa4|Os06g45690.1  
Orysa4|Os02g16250.1,Orysa4|Os10g36280.1  
Orysa4|Os04g02450.1  
Orysa4|Os10g10360.1  
Orysa4|Os11g45020.1  
Orysa4|Os03g50150.1  
Orysa4|Os02g27710.1  
Orysa4|Os02g27680.1  
Orysa4|Os12g10340.1  
Orysa4|Os07g33730.1  
AT1G33560,AT5G04720,AT4G33300  
Orysa4|Os11g30050.1  
Orysa4|Os08g16460.1  
Orysa4|Os12g10460.1,Orysa4|Os06g15730.1  
Orysa4|Os09g20020.1  
Orysa4|Os12g03750.1  
Orysa4|Os12g09710.1  
Orysa4|Os09g20040.1  
AT3G14460 Orysa4|Os03g20840.1  
Orysa4|Os11g42070.1  
Orysa4|Os11g15700.1  
Orysa4|Os08g09110.1  
Orysa4|Os04g53160.1  
Orysa4|Os11g40160.1

Orysa4|Os12g10330.1  
Orysa4|Os05g23990.1  
Orysa4|Os09g13810.1,Orysa4|Os11g42090.1,Orysa4|Os04g41370.1  
Orysa4|Os11g10570.1  
Orysa4|Os07g33720.1  
Orysa4|Os07g17220.1  
Orysa4|Os02g35550.1,Orysa4|Os02g27690.1,Orysa4|Os02g38386.1  
Orysa4|Os07g17250.1,Orysa4|Os02g05686.1  
Orysa4|Os10g25487.1,Orysa4|Os12g37290.1  
Orysa4|Os01g17130.1,Orysa4|Os07g17230.1  
Orysa4|Os07g33710.1  
Orysa4|Os04g02120.1  
Orysa4|Os04g30610.1  
AT5G43470,AT5G48620,AT5G35450,AT1G53350,AT1G58400,AT1G58410,AT1G58848,AT1G59218,AT1G58807,AT1G59124,AT1G58602,AT1G58390,AT1G59620,AT1G59780,AT1G50180  
Orysa4|Os11g30010.1  
Orysa4|Os03g63240.1  
AT3G50950 Orysa4|Os08g16120.1  
Orysa4|Os09g34160.1  
AT4G16095 Orysa4|Os05g16180.1  
Orysa4|Os11g30110.1  
Orysa4|Os11g10770.1,Orysa4|Os11g12260.1  
AT3G07040  
Orysa4|Os08g09430.1,Orysa4|Os04g46300.1,Orysa4|Os10g07978.1,Orysa4|Os06g22460.1,Orysa4|Os01g36640.1,Orysa4|Os11g12340.1,Orysa4|Os11g12330.1,Orysa4|Os11g12000.1,Orysa4|Os11g12240.1,Orysa4|Os11g1960.1,Orysa4|Os11g11990.1,Orysa4|Os11g11950.1,Orysa4|Os04g14220.1,Orysa4|Os11g12050.1,Orysa4|Os11g12300.1,Orysa4|Os11g12040.1,Orysa4|Os11g11770.1,Orysa4|Os02g09790.1,Orysa4|Os10g21400.1,Orysa4|Os11g35580.1,Orysa4|Os11g45330.1,Orysa4|Os01g33810.1,Orysa4|Os10g04674.1,Orysa4|Os04g21890.1,Orysa4|Os07g08890.1,Orysa4|Os09g09490.1,Orysa4|Os12g31620.1,Orysa4|Os04g02860.1,Orysa4|Os12g14330.1,Orysa4|Os08g05800.1,Orysa4|Os11g42040.1  
Orysa4|Os07g15360.1  
Orysa4|Os11g42010.1,Orysa4|Os06g41670.1  
Orysa4|Os05g50780.1  
Orysa4|Os03g40194.1  
Orysa4|Os07g26730.1,Orysa4|Os02g16070.1  
Orysa4|Os06g41640.1,Orysa4|Os06g41660.1  
Orysa4|Os08g42700.1,Orysa4|Os08g42670.1  
Orysa4|Os02g20480.1,Orysa4|Os11g10760.1  
Orysa4|Os05g01330.1  
AT2G43780 Orysa4|Os12g41760.1  
AT5G01940,AT3G07920  
AT5G20920 Orysa4|Os03g21550.1,Orysa4|Os07g48300.1  
AT1G22930,AT4G09150 Orysa4|Os04g35860.1,Orysa4|Os04g35840.1,Orysa4|Os02g35080.1  
AT5G03750,AT5G03450 Orysa4|Os10g39850.1,Orysa4|Os03g01790.1  
Orysa4|Os11g45430.1  
Orysa4|Os01g14860.1  
AT5G26751,AT3G05840 Orysa4|Os01g19150.1,Orysa4|Os05g04340.1  
AT5G14640  
Orysa4|Os10g37740.1  
AT2G30980,AT1G06390,AT4G18710 Orysa4|Os05g11730.1,Orysa4|Os01g10840.1,Orysa4|Os06g35530.1  
AT1G57870,AT1G09840 Orysa4|Os03g62500.1  
AT4G00720,AT3G61160  
Orysa4|Os11g20310.1  
AT4G17150 Orysa4|Os02g10440.1,Orysa4|Os06g40730.1  
AT3G23540,AT4G14290 Orysa4|Os03g24450.1  
Orysa4|Os01g01830.1,Orysa4|Os04g47360.1  
AT1G20380,AT1G76140  
Orysa4|Os04g31150.1  
AT5G25990  
AT4G32290,AT5G25330  
AT3G52060,AT5G22070 Orysa4|Os12g42420.1,Orysa4|Os03g44580.1,Orysa4|Os07g06490.1  
AT2G19160,AT4G30060,AT5G57270,AT4G25870  
Orysa4|Os02g07880.1,Orysa4|Os06g45110.1,Orysa4|Os06g48700.1,Orysa4|Os08g12890.1  
AT5G25970,AT5G11730,AT1G51770,AT3G21310 Orysa4|Os03g52120.1  
AT5G14550  
Orysa4|Os01g04220.1,Orysa4|Os01g04210.1,Orysa4|Os10g08280.1  
AT1G11940,AT1G62305 Orysa4|Os01g50040.1  
Orysa4|Os01g65490.1  
AT4G31350  
AT1G68380,AT1G68390,AT1G73810 Orysa4|Os02g22160.1  
AT5G16170,AT1G10880  
AT1G10280 Orysa4|Os08g01890.1  
Orysa4|Os12g43880.1  
AT5G10870 Orysa4|Os08g34290.1,Orysa4|Os02g08410.1  
Orysa4|Os12g38900.1  
AT1G69370  
Orysa4|Os01g55870.1  
AT3G29200  
AT5G62810 Orysa4|Os05g50220.1,Orysa4|Os01g01720.1  
Orysa4|Os02g35070.1  
AT1G35470,AT4G09340  
AT4G09200,AT4G09310,AT4G09250

AT3G04510,AT5G28490  
AT1G07090 Orysa4|Os05g28040.1  
AT2G42610,AT1G16910,AT1G78815,AT4G18610  
AT5G58500 Orysa4|Os02g41460.1,Orysa4|Os04g43580.1,Orysa4|Os02g56610.1,Orysa4|Os02g07030.1  
AT3G23290 Orysa4|Os07g04670.1  
Orysa4|Os01g61310.1,Orysa4|Os05g39500.1  
AT2G31160 Orysa4|Os08g09660.1,Orysa4|Os08g14970.1,Orysa4|Os05g27120.1,Orysa4|Os01g54180.1,Orysa4|Os06  
g46030.1  
AT1G54470,AT1G11540,AT1G61740,AT4G21260,AT4G21250 Orysa4|Os01g57700.1,Orysa4|Os01g57710.1  
AT2G25737 Orysa4|Os09g17600.1,Orysa4|Os08g30020.1,Orysa4|Os08g29760.1  
AT2G36630 Orysa4|Os03g51650.1  
AT3G11890,AT3G11860 Orysa4|Os08g29100.1  
AT3G15680,AT5G25490 Orysa4|Os06g04920.1  
AT2G26695 Orysa4|Os01g37460.1  
AT1G75330  
Orysa4|Os02g47590.1  
AT1G67420 Orysa4|Os07g19530.1  
AT4G14385 Orysa4|Os01g13250.1,Orysa4|Os12g20310.1  
AT1G47570 Orysa4|Os08g02950.1,Orysa4|Os11g07450.1  
AT3G45830 Orysa4|Os05g02680.1  
AT1G55265 Orysa4|Os03g48626.1  
AT3G07460,AT3G07470,AT5G16380,AT5G54530,AT1G61667 Orysa4|Os09g19340.1,Orysa4|Os01g68500.1  
AT5G19860  
AT1G74770,AT1G18920,AT1G74760,AT1G18910  
AT3G18290 Orysa4|Os05g47780.1,Orysa4|Os01g49470.1  
AT3G04090,AT5G18290 Orysa4|Os01g08660.1  
AT2G25920 Orysa4|Os05g06420.1  
AT1G54310 Orysa4|Os02g07740.1  
AT1G65220,AT5G36230 Orysa4|Os11g21990.1  
AT2G37780  
AT1G20990 Orysa4|Os09g31980.1  
Orysa4|Os01g68470.1,Orysa4|Os01g68460.1  
Orysa4|Os08g31170.1,Orysa4|Os08g31250.1,Orysa4|Os08g31280.1,Orysa4|Os08g30590.1  
Orysa4|Os09g20150.1  
AT2G16050 Orysa4|Os12g40470.1  
AT2G42900 Orysa4|Os05g50500.1  
AT3G04280,AT5G26594  
Orysa4|Os03g53100.1  
Orysa4|Os04g13480.1  
Orysa4|Os10g35810.1  
AT5G53490  
AT1G57610,AT1G09575 Orysa4|Os11g03130.1,Orysa4|Os12g02880.1,Orysa4|Os01g60110.1  
AT2G47485,AT3G62650 Orysa4|Os05g29000.1,Orysa4|Os01g20730.1  
AT4G11175 Orysa4|Os12g33960.1  
AT3G29330 Orysa4|Os10g17740.1  
AT5G05520,AT3G11070 Orysa4|Os11g01490.1,Orysa4|Os12g01500.1,Orysa4|Os05g39390.1  
AT1G73655,AT1G18170 Orysa4|Os03g50080.1  
AT2G47600 Orysa4|Os02g43110.1,Orysa4|Os11g43860.1  
AT1G56290 Orysa4|Os03g52980.1  
AT2G21980,AT2G41350 Orysa4|Os08g14220.1  
AT1G30950 Orysa4|Os06g45460.1  
AT1G09815 Orysa4|Os08g43080.1,Orysa4|Os09g34850.1,Orysa4|Os08g06620.1  
AT1G71860 Orysa4|Os11g07850.1,Orysa4|Os12g07590.1  
AT2G32770  
AT3G52810,AT3G52820  
Orysa4|Os04g33530.1,Orysa4|Os12g05510.1  
AT3G20500 Orysa4|Os03g37130.1  
AT3G07130 Orysa4|Os03g63074.1  
AT4G13700 Orysa4|Os08g17784.1  
AT3G52780 Orysa4|Os12g05540.1,Orysa4|Os11g05410.1  
AT5G48440  
Orysa4|Os09g33900.1  
AT3G59770 Orysa4|Os01g25330.1  
AT3G25855  
AT1G68580 Orysa4|Os10g26430.1,Orysa4|Os09g24290.1,Orysa4|Os09g24310.1  
AT5G55600 Orysa4|Os07g41640.1  
AT4G21130,AT4G05410 Orysa4|Os03g42770.1  
AT1G72410,AT1G17360 Orysa4|Os07g42410.1  
AT1G10170 Orysa4|Os06g14190.1  
AT5G05660 Orysa4|Os01g06550.1  
AT4G21560,AT4G05000 Orysa4|Os01g57260.1  
AT1G73885 Orysa4|Os03g50270.1  
Orysa4|Os01g57500.1  
AT4G02580 Orysa4|Os05g43360.1  
Orysa4|Os03g56869.1  
AT2G01290,AT1G71100  
AT5G44520  
AT3G04790 Orysa4|Os07g08030.1  
AT5G56090 Orysa4|Os08g38720.1

AT5G08420 Orysa4|Os01g51620.1,Orysa4|Os10g31520.1  
AT5G07225  
AT5G66160  
AT1G71980,AT1G22670 Orysa4|Os03g07130.1,Orysa4|Os08g01360.1  
AT1G35625,AT1G35630,AT4G09560  
AT1G02020 Orysa4|Os10g11340.1  
Orysa4|Os02g03320.1  
Orysa4|Os11g07440.1  
AT1G56560,AT3G05820,AT3G06500 Orysa4|Os01g22900.1  
AT1G22650,AT1G72000,AT1G35580,AT4G09510 Orysa4|Os04g35280.1,Orysa4|Os02g34560.1  
AT5G22510  
AT4G34860  
Orysa4|Os04g33490.1,Orysa4|Os02g32730.1  
Orysa4|Os03g20020.1  
Orysa4|Os08g44280.1  
AT3G48330  
AT5G50240  
Orysa4|Os04g40540.1  
AT1G11420,AT2G47220,AT2G47230,AT1G26540,AT1G03300,AT5G23770,AT5G23780,AT5G23800,AT3G62300  
Orysa4|Os11g19730.1  
AT1G09320 Orysa4|Os05g04180.1  
AT1G06340,AT2G46840  
AT3G06520  
AT2G34720,AT1G30500 Orysa4|Os12g41880.1  
AT5G12840,AT3G20910  
AT1G54160,AT3G14020,AT1G72830,AT1G17590  
Orysa4|Os03g29760.1,Orysa4|Os07g41720.1,Orysa4|Os03g07880.1,Orysa4|Os10g25850.1,Orysa4|Os02  
g53620.1  
AT5G06510,AT3G05690 Orysa4|Os07g06470.1,Orysa4|Os12g42400.1  
AT5G41560 Orysa4|Os03g03420.1  
AT4G24175 Orysa4|Os04g17700.1,Orysa4|Os04g24410.1  
AT5G48120 Orysa4|Os07g08050.1  
AT3G48530  
Orysa4|Os01g44250.1  
Orysa4|Os01g69240.1  
AT1G69800 Orysa4|Os01g40420.1  
Orysa4|Os12g16300.1  
Orysa4|Os04g31340.1  
AT1G17410  
Orysa4|Os02g35700.1  
Orysa4|Os05g51700.1  
Orysa4|Os07g30970.1  
AT4G09320  
AT4G23900,AT4G11010  
AT5G63310 Orysa4|Os12g36194.1  
Orysa4|Os10g41410.1  
Orysa4|Os11g40070.1  
AT2G15695  
AT5G44250  
Orysa4|Os06g11040.1  
AT3G08610 Orysa4|Os05g40300.1  
AT1G49130  
AT1G73870  
Orysa4|Os06g15330.1  
AT1G25440,AT1G68520  
AT1G07050  
Orysa4|Os07g10970.1,Orysa4|Os07g10920.1  
AT3G29400,AT5G61010  
Orysa4|Os10g05050.1  
AT5G52350  
Orysa4|Os04g58880.1  
Orysa4|Os08g41820.1  
AT1G54090,AT3G14090,AT1G72470 Orysa4|Os08g35470.1,Orysa4|Os09g26820.1  
AT5G13990,AT5G13150 Orysa4|Os12g06840.1,Orysa4|Os11g06700.1  
AT1G51640  
Orysa4|Os09g21150.1,Orysa4|Os12g39960.1,Orysa4|Os01g05580.1  
AT1G07725,AT2G28640,AT2G28650,AT5G59730,AT3G09530,AT3G09520,AT3G55150,AT2G39380  
Orysa4|Os11g43049.1,Orysa4|Os03g33520.1,Orysa4|Os12g01040.1  
AT5G03540,AT5G52340 Orysa4|Os11g05880.1  
AT4G31540 Orysa4|Os06g48330.1,Orysa4|Os02g05620.1  
AT5G50380 Orysa4|Os04g31330.1,Orysa4|Os02g30230.1  
Orysa4|Os06g08460.1  
Orysa4|Os11g43000.1  
Orysa4|Os02g28310.1,Orysa4|Os08g40840.1,Orysa4|Os03g24420.1  
AT5G58430,AT1G07000 Orysa4|Os01g61180.1,Orysa4|Os05g39610.1,Orysa4|Os01g61190.1  
Orysa4|Os04g58870.1  
Orysa4|Os01g28600.1,Orysa4|Os02g36619.1,Orysa4|Os01g67820.1,Orysa4|Os01g67810.1,Orysa4|Os07  
g10960.1,Orysa4|Os07g10910.1,Orysa4|Os07g10940.1,Orysa4|Os01g69280.1  
Orysa4|Os05g04760.1  
AT1G77610,AT1G21870 Orysa4|Os04g59550.1,Orysa4|Os08g01410.1  
AT3G10290,AT5G04160  
AT1G12500

AT3G11320,AT5G05820  
Orysa4|Os05g03070.1  
AT1G01380,AT4G01060,AT2G30432,AT2G30420,AT5G53200,AT2G46410 Orysa4|Os01g43180.1  
AT2G23380 Orysa4|Os06g16390.1  
AT1G02580  
AT4G02020 Orysa4|Os03g19480.1  
AT5G42570 Orysa4|Os05g19040.1,Orysa4|Os06g26270.1,Orysa4|Os02g21650.1  
AT3G07190,AT5G48660 Orysa4|Os07g19070.1,Orysa4|Os03g63110.1  
AT1G11905,AT3G20450  
AT4G27010,AT1G72270  
Orysa4|Os04g55130.1  
Orysa4|Os04g53380.1  
AT2G39910 Orysa4|Os06g47900.1  
AT1G19180,AT1G74950,AT1G72450,AT1G17380  
Orysa4|Os03g08330.1,Orysa4|Os10g25230.1,Orysa4|Os03g08310.1,Orysa4|Os10g25290.1,Orysa4|Os03g08320.1,Orysa4|Os03g27900.1,Orysa4|Os09g26780.1,Orysa4|Os07g42370.1  
Orysa4|Os03g10940.1  
AT5G67380 Orysa4|Os03g55389.1  
AT2G23070  
Orysa4|Os07g02350.1  
Orysa4|Os03g55490.1  
AT3G50000,AT2G23080  
AT5G02410 Orysa4|Os04g42490.1  
AT5G23030,AT1G18520  
AT4G23410 Orysa4|Os05g03530.1  
AT5G60220,AT3G45600 Orysa4|Os05g03140.1  
Orysa4|Os08g16050.1  
AT3G12090  
AT5G57810,AT2G01960,AT2G03840  
AT1G63260  
Orysa4|Os03g63600.1,Orysa4|Os12g14580.1,Orysa4|Os03g63620.1  
Orysa4|Os02g49630.1  
AT2G19580 Orysa4|Os02g12750.1,Orysa4|Os06g37510.1  
AT4G30430,AT2G23810,AT4G28050 Orysa4|Os06g44310.1,Orysa4|Os09g25760.1  
AT5G46700  
Orysa4|Os05g36370.1  
AT5G44780,AT4G20020 Orysa4|Os11g11020.1  
AT2G46670,AT2G46790 Orysa4|Os11g05930.1  
AT5G61380 Orysa4|Os02g40510.1  
Orysa4|Os03g17570.1,Orysa4|Os07g49460.1  
AT5G60100  
AT5G24470 Orysa4|Os09g36220.1  
AT5G02810  
AT4G24440 Orysa4|Os01g73890.1,Orysa4|Os05g01710.1  
AT5G04920 Orysa4|Os01g59800.1  
AT4G13720 Orysa4|Os10g31940.1  
AT4G04780,AT1G33450,AT5G15690 Orysa4|Os08g04150.1  
AT5G37840,AT1G66480,AT1G71015,AT2G01340  
Orysa4|Os02g49960.1,Orysa4|Os06g14780.1,Orysa4|Os09g23780.1,Orysa4|Os08g33210.1  
AT5G37130,AT5G17270 Orysa4|Os07g27180.1  
AT5G05190 Orysa4|Os12g02490.1,Orysa4|Os11g02550.1,Orysa4|Os02g26560.1  
AT4G33540 Orysa4|Os02g58260.1,Orysa4|Os02g58270.1  
AT5G48830 Orysa4|Os02g31070.1  
AT5G27720 Orysa4|Os01g15310.1  
AT1G50020  
AT2G36580,AT3G52990  
Orysa4|Os03g46910.1  
AT1G32440 Orysa4|Os10g42100.1  
Orysa4|Os11g05110.1,Orysa4|Os12g05110.1  
Orysa4|Os11g10980.1  
AT5G08570,AT5G63680 Orysa4|Os04g58110.1  
AT3G22960  
AT5G56350,AT4G26390,AT3G55810,AT3G55650,AT3G25960,AT3G04050  
Orysa4|Os03g20880.1,Orysa4|Os01g16960.1  
AT5G52920 Orysa4|Os01g47080.1  
Orysa4|Os11g34870.1  
Orysa4|Os09g22410.1  
AT3G50670  
Orysa4|Os02g11750.1  
Orysa4|Os10g02630.1  
Orysa4|Os07g40260.1  
Orysa4|Os04g12160.1  
AT1G31450,AT2G35615,AT5G33340,AT1G64830,AT2G28010,AT2G28030,AT2G28220,AT2G28040  
Orysa4|Os01g08330.1  
Orysa4|Os04g26490.1  
AT2G23945,AT4G30040,AT4G30030,AT4G12920  
Orysa4|Os05g31170.1,Orysa4|Os12g39360.1,Orysa4|Os10g39260.1,Orysa4|Os10g39300.1,Orysa4|Os10g39380.1,Orysa4|Os10g39340.1,Orysa4|Os10g39320.1,Orysa4|Os10g39270.1,Orysa4|Os10g39330.1,Orysa4|Os10g39310.1,Orysa4|Os10g39350.1,Orysa4|Os10g39390.1,Orysa4|Os04g37570.1  
Orysa4|Os07g34850.1,Orysa4|Os07g34900.1,Orysa4|Os07g34870.1,Orysa4|Os01g50170.1  
Orysa4|Os09g37012.1  
AT5G24820 Orysa4|Os08g10670.1,Orysa4|Os04g50850.1,Orysa4|Os08g10730.1

Orysa4|Os05g51350.1,Orysa4|Os06g11010.1,Orysa4|Os12g05750.1  
AT1G05840,AT3G02740,AT1G65240,AT5G36260  
Orysa4|Os04g26834.1,Orysa4|Os02g27360.1,Orysa4|Os04g26790.1  
Orysa4|Os06g20120.1,Orysa4|Os06g20110.1,Orysa4|Os06g20140.1  
AT5G07030,AT3G54400 Orysa4|Os07g46480.1,Orysa4|Os01g72510.1  
Orysa4|Os04g26470.1  
Orysa4|Os03g20270.1,Orysa4|Os03g20260.1,Orysa4|Os03g20230.1,Orysa4|Os04g24750.1,Orysa4|Os06  
g10670.1  
AT3G50050  
AT1G79720 Orysa4|Os09g25570.1,Orysa4|Os08g16660.1  
Orysa4|Os09g27910.1,Orysa4|Os08g36530.1,Orysa4|Os07g34920.1  
AT5G45120 Orysa4|Os05g43550.1  
Orysa4|Os01g42320.1,Orysa4|Os02g48870.1,Orysa4|Os06g02730.1,Orysa4|Os06g02900.1,Orysa4|Os06  
g02780.1,Orysa4|Os06g03080.1,Orysa4|Os06g03120.1,Orysa4|Os06g20190.1  
Orysa4|Os06g40818.1,Orysa4|Os09g30434.1  
AT2G36670,AT5G22850,AT1G08210 Orysa4|Os01g56930.1  
AT3G42550  
AT1G09750 Orysa4|Os03g08790.1  
AT1G01300,AT3G61820 Orysa4|Os05g51220.1,Orysa4|Os01g41550.1  
AT3G12700 Orysa4|Os01g48750.1,Orysa4|Os05g48330.1  
Orysa4|Os09g27940.1  
Orysa4|Os01g48740.1  
Orysa4|Os01g64840.1,Orysa4|Os01g64830.1,Orysa4|Os05g31830.1,Orysa4|Os12g26470.1  
AT5G37540,AT1G66180  
AT5G43100  
AT2G42980,AT3G59080 Orysa4|Os02g21040.1  
Orysa4|Os07g34910.1  
AT5G02190,AT2G39710 Orysa4|Os03g16500.1,Orysa4|Os01g62630.1  
AT4G16563 Orysa4|Os04g45270.1  
AT3G18490,AT1G25510  
AT3G20015 Orysa4|Os04g58070.1  
Orysa4|Os04g26380.1,Orysa4|Os05g31890.1  
AT3G52500 Orysa4|Os03g17280.1,Orysa4|Os04g58840.1  
AT4G04985  
Orysa4|Os02g48900.1,Orysa4|Os06g20040.1  
Orysa4|Os08g36540.1,Orysa4|Os07g34940.1  
Orysa4|Os05g09530.1  
AT5G10760,AT5G10770  
AT3G25700  
AT2G03200 Orysa4|Os04g37550.1  
AT1G71730 Orysa4|Os05g08920.1  
AT3G09035,AT5G01090,AT3G54080 Orysa4|Os07g01100.1  
AT1G35170,AT1G35180,AT1G45010 Orysa4|Os01g15770.1  
AT5G47900 Orysa4|Os04g33200.1,Orysa4|Os02g32504.1,Orysa4|Os11g34110.1  
Orysa4|Os11g14080.1  
AT5G27730 Orysa4|Os01g70550.1  
Orysa4|Os05g06360.1  
Orysa4|Os12g09210.1  
AT3G43684 Orysa4|Os11g37020.1,Orysa4|Os12g09200.1,Orysa4|Os04g20510.1,Orysa4|Os11g20260.1  
AT2G20420 Orysa4|Os02g40830.1  
AT4G21530 Orysa4|Os02g54490.1  
AT3G42850  
Orysa4|Os02g04840.1,Orysa4|Os06g48940.1  
Orysa4|Os03g13690.1  
AT4G16130  
AT3G53390,AT2G37160 Orysa4|Os12g07450.1  
AT1G32200 Orysa4|Os10g42720.1  
AT2G15890 Orysa4|Os03g55670.1,Orysa4|Os03g55680.1  
Orysa4|Os04g26080.1,Orysa4|Os02g51090.1  
AT4G35590,AT1G18790,AT1G74480,AT5G66990  
AT5G53040  
Orysa4|Os01g37100.1  
AT3G28720 Orysa4|Os06g38550.1  
AT2G47980 Orysa4|Os05g09620.1  
AT2G47010,AT1G17030 Orysa4|Os05g19000.1,Orysa4|Os05g19030.1  
AT4G09965  
Orysa4|Os12g39690.1  
AT2G35210,AT5G46750,AT4G17890 Orysa4|Os10g42420.1  
AT4G27600 Orysa4|Os10g42240.1  
Orysa4|Os02g22480.1,Orysa4|Os03g37010.1,Orysa4|Os12g13640.1,Orysa4|Os01g02900.1,Orysa4|Os06  
g27560.1,Orysa4|Os02g22380.1  
Orysa4|Os08g34680.1,Orysa4|Os06g13710.1,Orysa4|Os06g49300.1  
Orysa4|Os06g20570.1  
AT3G18170,AT3G18180 Orysa4|Os01g02940.1  
Orysa4|Os01g02930.1,Orysa4|Os01g02920.1,Orysa4|Os04g12010.1,Orysa4|Os02g22190.1,Orysa4|Os06  
g28124.1  
Orysa4|Os05g32544.1  
AT2G41640,AT3G57380,AT3G10320 Orysa4|Os01g31370.1  
Orysa4|Os06g49320.1,Orysa4|Os10g35020.1  
Orysa4|Os11g36700.1,Orysa4|Os01g72610.1  
AT2G03370,AT2G03360  
Orysa4|Os07g46380.1



AT3G07050 Orysa4|Os01g27730.1  
AT1G15980 Orysa4|Os08g17390.1  
AT3G06610 Orysa4|Os03g61680.1  
AT3G15140 Orysa4|Os06g24594.1  
Orysa4|Os07g20140.1  
AT5G37830 Orysa4|Os01g73514.1  
AT2G26970 Orysa4|Os04g23830.1  
Orysa4|Os02g26660.1  
AT3G17900 Orysa4|Os03g05812.1  
AT2G42750 Orysa4|Os01g53020.1  
AT5G64000,AT5G09290,AT5G63990  
AT4G05090 Orysa4|Os07g37230.1  
AT5G54390  
AT5G63980 Orysa4|Os12g08270.1,Orysa4|Os12g08280.1  
Orysa4|Os02g56170.1  
AT2G04940 Orysa4|Os04g51080.1  
AT1G73750 Orysa4|Os01g49760.1,Orysa4|Os08g27050.1  
AT1G15060  
AT3G43490,AT3G43590,AT5G36240  
Orysa4|Os11g36480.1  
AT2G32080 Orysa4|Os01g15600.1  
AT3G28350,AT3G28370,AT1G51430 Orysa4|Os06g12940.1,Orysa4|Os06g13580.1  
AT5G55820 Orysa4|Os08g38310.1,Orysa4|Os09g30070.1  
AT1G03687 Orysa4|Os08g14390.1,Orysa4|Os06g23504.1  
AT1G32560,AT2G35300 Orysa4|Os04g49980.1  
Orysa4|Os04g37810.1  
AT5G10320  
AT5G05970 Orysa4|Os09g09470.1  
AT5G57740 Orysa4|Os02g54860.1  
AT5G07270 Orysa4|Os10g37730.1  
Orysa4|Os06g03800.1  
AT4G00290,AT4G00234 Orysa4|Os02g45690.1,Orysa4|Os04g48940.1  
AT1G17650 Orysa4|Os01g39270.1  
AT3G25530 Orysa4|Os02g35500.1  
AT4G04200,AT2G39960 Orysa4|Os04g36868.1,Orysa4|Os04g36859.1,Orysa4|Os02g35720.1  
AT1G16210 Orysa4|Os03g03980.1,Orysa4|Os04g47370.1,Orysa4|Os05g28880.1  
AT5G61340 Orysa4|Os12g38810.1,Orysa4|Os12g32260.1,Orysa4|Os06g44360.1  
AT1G52980 Orysa4|Os03g22890.1  
AT3G62130,AT5G26600 Orysa4|Os01g18660.1,Orysa4|Os01g18640.1  
AT4G22300 Orysa4|Os04g57370.1  
Orysa4|Os04g57390.1,Orysa4|Os04g57380.1  
AT4G02380,AT1G02820,AT4G15910,AT3G53770 Orysa4|Os05g29930.1,Orysa4|Os01g21250.1  
Orysa4|Os03g48920.1  
AT1G54520 Orysa4|Os08g02570.1,Orysa4|Os08g02560.1,Orysa4|Os08g02580.1  
AT1G28260  
AT5G02650  
AT5G19400 Orysa4|Os08g21350.1  
AT3G26085 Orysa4|Os05g22930.1  
Orysa4|Os09g23170.1  
AT5G16550 Orysa4|Os08g32980.1  
AT4G01590,AT4G35680 Orysa4|Os07g42080.1  
AT3G06750,AT5G49280,AT4G16140,AT1G23050,AT1G70985 Orysa4|Os09g16280.1,Orysa4|Os01g02160.1  
AT4G17430 Orysa4|Os10g41180.1  
AT2G34940,AT1G30900,AT4G20110 Orysa4|Os04g52190.1,Orysa4|Os06g45380.1  
AT2G14720,AT2G14740 Orysa4|Os10g20630.1  
AT3G52850,AT2G30290 Orysa4|Os03g21720.1,Orysa4|Os07g48229.1,Orysa4|Os12g02390.1  
AT1G50710 Orysa4|Os02g02690.1  
AT5G05950,AT3G46890 Orysa4|Os07g13600.1  
AT2G01580 Orysa4|Os04g01960.1  
AT3G07510 Orysa4|Os10g09930.1  
AT3G04600 Orysa4|Os07g17770.1,Orysa4|Os12g35570.1  
AT5G21990 Orysa4|Os04g35690.1,Orysa4|Os07g06710.1  
AT5G11620 Orysa4|Os06g36030.1  
AT5G08565,AT5G63670 Orysa4|Os07g43060.1  
AT5G24710 Orysa4|Os01g46510.1  
Orysa4|Os01g46460.1,Orysa4|Os01g46450.1  
Orysa4|Os09g36830.1  
AT3G60020 Orysa4|Os07g43230.1,Orysa4|Os07g43220.1,Orysa4|Os02g42980.1,Orysa4|Os12g41100.1,Orysa4|Os09g10020.1,Orysa4|Os10g33380.1,Orysa4|Os10g21720.1,Orysa4|Os06g02270.1  
Orysa4|Os02g13180.1,Orysa4|Os09g10300.1,Orysa4|Os09g10260.1,Orysa4|Os09g10200.1,Orysa4|Os07g05150.1,Orysa4|Os07g05180.1,Orysa4|Os06g02350.1,Orysa4|Os06g02360.1,Orysa4|Os08g28800.1,Orysa4|Os08g28820.1,Orysa4|Os08g28780.1,Orysa4|Os09g10230.1,Orysa4|Os09g10270.1,Orysa4|Os07g05160.1,Orysa4|Os07g2680.1  
AT3G53060 Orysa4|Os02g01160.1  
AT2G25700,AT1G20140  
AT5G42190,AT1G75950  
Orysa4|Os07g43270.1,Orysa4|Os07g43260.1,Orysa4|Os07g43180.1,Orysa4|Os07g43240.1

Orysa4|Os11g26910.1  
AT4G34470,AT4G34210,AT3G60010,AT3G21850,AT3G21860,AT3G21840,AT3G21830,AT2G03160,AT3G25650,AT1  
G10230,AT2G20160,AT2G03190,AT2G03170  
AT4G14320,AT3G23390  
Orysa4|Os07g33979.1,Orysa4|Os07g33921.1,Orysa4|Os07g33880.1,Orysa4|Os07g26740.1,Orysa4|Os07  
g33870.1,Orysa4|Os07g33943.1,Orysa4|Os07g33860.1,Orysa4|Os07g33970.1  
AT4G13330  
Orysa4|Os02g50150.1,Orysa4|Os02g50140.1,Orysa4|Os06g14324.1,Orysa4|Os06g14350.1  
AT1G23250,AT1G23240  
AT4G26740,AT5G55240,AT5G29560,AT2G33380 Orysa4|Os04g43170.1,Orysa4|Os04g43200.1  
AT1G70680,AT1G70670 Orysa4|Os06g14370.1  
Orysa4|Os03g12230.1  
Orysa4|Os01g44980.1,Orysa4|Os01g45070.1  
AT5G14660  
Orysa4|Os06g40620.1  
AT2G19830,AT4G29160 Orysa4|Os09g09480.1  
Orysa4|Os12g02830.1,Orysa4|Os11g03060.1  
Orysa4|Os07g30830.1  
Orysa4|Os06g22010.1,Orysa4|Os10g21260.1,Orysa4|Os10g38210.1,Orysa4|Os01g58030.1,Orysa4|Os12  
g19420.1,Orysa4|Os04g39830.1  
Orysa4|Os06g27760.1  
AT4G04800  
AT1G53670  
Orysa4|Os05g33510.1  
AT4G21830,AT4G21840,AT4G21850,AT4G04840  
Orysa4|Os03g24600.1  
AT4G04810,AT4G04830,AT4G21860  
AT2G44510,AT5G03830 Orysa4|Os03g63690.1  
AT5G05510 Orysa4|Os12g03180.1,Orysa4|Os11g03460.1  
Orysa4|Os12g12300.1  
Orysa4|Os03g15990.1  
AT5G48080  
Orysa4|Os08g24952.1,Orysa4|Os01g32720.1  
Orysa4|Os08g24930.1  
AT5G55390,AT5G48090  
Orysa4|Os01g32710.1,Orysa4|Os08g24946.1  
Orysa4|Os08g24880.1  
AT1G21070,AT1G76670,AT5G42420 Orysa4|Os07g39280.1  
AT5G57100  
Orysa4|Os10g33920.1,Orysa4|Os02g41780.1  
AT2G28315 Orysa4|Os06g19380.1  
AT2G30460,AT1G06890 Orysa4|Os05g07670.1  
AT1G34020,AT4G09810,AT4G39390  
Orysa4|Os02g40090.1,Orysa4|Os05g12490.1,Orysa4|Os12g05780.1,Orysa4|Os12g05830.1  
Orysa4|Os01g60780.1  
AT5G55950 Orysa4|Os02g49260.1  
AT4G01940 Orysa4|Os03g20010.1  
Orysa4|Os04g52270.1  
AT2G34840,AT1G30630 Orysa4|Os04g55200.1  
AT2G28910 Orysa4|Os05g23240.1,Orysa4|Os09g01640.1  
AT3G05320 Orysa4|Os02g07200.1  
AT3G60210,AT2G44650 Orysa4|Os10g41710.1  
AT1G44960 Orysa4|Os11g33100.1  
AT5G24520 Orysa4|Os02g45810.1  
AT1G12910,AT3G26640 Orysa4|Os02g32430.1  
AT1G06590 Orysa4|Os12g43120.1  
AT3G48200 Orysa4|Os08g38140.1,Orysa4|Os05g51620.1  
AT5G27370  
Orysa4|Os01g26904.1,Orysa4|Os01g29240.1,Orysa4|Os07g22510.1,Orysa4|Os01g29280.1,Orysa4|Os01  
g29330.1  
Orysa4|Os12g22270.1,Orysa4|Os02g27800.1,Orysa4|Os06g24490.1  
AT5G46090,AT4G18425 Orysa4|Os05g48840.1  
Orysa4|Os01g27100.1,Orysa4|Os01g27070.1  
AT3G21550,AT3G21520 Orysa4|Os03g25440.1  
AT5G39650,AT1G09157,AT4G28485  
Orysa4|Os01g65992.1  
AT3G02430,AT4G24310 Orysa4|Os08g01530.1  
AT1G29260 Orysa4|Os02g14790.1  
Orysa4|Os01g01840.1,Orysa4|Os01g01870.1  
AT4G20970 Orysa4|Os02g13670.1  
AT1G10585  
AT5G60150 Orysa4|Os11g01220.1,Orysa4|Os12g01220.1,Orysa4|Os12g37564.1  
AT2G27810  
AT2G34190 Orysa4|Os08g28170.1,Orysa4|Os09g15170.1,Orysa4|Os01g55500.1  
AT1G60030,AT1G10540,AT5G62890,AT5G49990 Orysa4|Os09g21340.1,Orysa4|Os08g32500.1  
AT5G25420,AT1G65550  
AT2G05760  
AT1G49960 Orysa4|Os03g48810.1  
AT2G26510 Orysa4|Os12g39420.1  
AT4G38050  
Orysa4|Os01g63870.1  
AT5G04000 Orysa4|Os05g41620.1

AT1G26820,AT1G14220,AT1G14210  
AT2G02990 Orysa4|Os08g33710.1  
Orysa4|Os09g36700.1,Orysa4|Os09g36680.1  
AT2G39780 Orysa4|Os07g43600.1,Orysa4|Os07g43640.1,Orysa4|Os07g43670.1  
AT2G22260 Orysa4|Os06g17830.1  
AT3G61190,AT2G45760 Orysa4|Os09g35780.1  
Orysa4|Os06g03810.1  
Orysa4|Os05g38140.1,Orysa4|Os02g02480.1  
AT3G23210,AT4G14410  
AT5G54680,AT1G51070 Orysa4|Os08g04390.1,Orysa4|Os07g35870.1  
AT5G50550,AT5G50650,AT2G01470 Orysa4|Os11g39650.1  
AT3G52190 Orysa4|Os03g58570.1,Orysa4|Os07g09000.1  
AT1G36240,AT3G18740,AT1G77940 Orysa4|Os01g59730.1,Orysa4|Os05g41110.1,Orysa4|Os01g16890.1  
AT1G15970,AT1G80850  
AT1G75090 Orysa4|Os03g10220.1  
AT5G57970 Orysa4|Os04g42290.1  
Orysa4|Os06g44050.1  
AT1G13635 Orysa4|Os08g38170.1  
Orysa4|Os09g25290.1  
AT5G44680,AT3G12710 Orysa4|Os01g58550.1  
Orysa4|Os06g40840.1  
Orysa4|Os05g45980.1,Orysa4|Os02g03400.1  
AT2G30115  
AT2G38720 Orysa4|Os05g33890.1  
AT5G51600,AT5G62250 Orysa4|Os05g47970.1,Orysa4|Os01g49200.1  
AT3G60840  
AT1G27920 Orysa4|Os08g41890.1  
AT4G26760,AT5G55230 Orysa4|Os02g48830.1,Orysa4|Os06g20370.1  
AT1G14690,AT2G01910 Orysa4|Os03g13460.1  
AT1G80310 Orysa4|Os01g45830.1  
AT2G25680  
Orysa4|Os01g56600.1  
AT5G66970 Orysa4|Os05g43390.1  
AT5G49500,AT1G48900,AT1G15310  
AT3G27620,AT3G22360,AT3G22370,AT1G32350,AT5G64210  
Orysa4|Os04g46770.1,Orysa4|Os02g47200.1,Orysa4|Os05g39360.1,Orysa4|Os06g07570.1,Orysa4|Os04  
g51150.1,Orysa4|Os04g51160.1,Orysa4|Os02g21300.1  
AT1G72880 Orysa4|Os01g51280.1  
AT4G14930 Orysa4|Os07g10460.1  
Orysa4|Os01g07170.1,Orysa4|Os09g20800.1,Orysa4|Os12g41350.1  
Orysa4|Os03g10580.1,Orysa4|Os09g32930.1  
AT1G67370 Orysa4|Os03g10570.1  
AT1G30580 Orysa4|Os08g09940.1  
AT1G56050 Orysa4|Os03g56840.1  
AT1G02300,AT1G02305,AT4G01610 Orysa4|Os05g24550.1  
Orysa4|Os01g57460.1  
AT4G03240  
AT4G21070 Orysa4|Os05g40810.1  
AT1G04020 Orysa4|Os04g43300.1  
AT1G15270,AT3G16040 Orysa4|Os02g06450.1  
AT1G26840 Orysa4|Os07g43540.1  
AT5G53090,AT5G53100,AT4G27760 Orysa4|Os02g02470.1  
AT3G52860 Orysa4|Os05g06290.1  
AT5G40830,AT3G27230 Orysa4|Os06g04680.1  
Orysa4|Os08g02150.1  
AT4G01240  
AT3G05390 Orysa4|Os06g27980.1  
AT1G29790 Orysa4|Os10g42770.1  
AT4G15080,AT3G22180 Orysa4|Os09g38970.1,Orysa4|Os08g44230.1  
AT1G69420 Orysa4|Os10g19180.1,Orysa4|Os03g11110.1  
AT2G33640 Orysa4|Os04g49560.1  
AT4G01730 Orysa4|Os12g16210.1  
AT4G28660  
Orysa4|Os01g71190.1  
AT1G27290 Orysa4|Os01g69870.1,Orysa4|Os09g32960.1  
AT5G09830 Orysa4|Os01g64680.1  
AT2G47650,AT3G62830 Orysa4|Os01g21320.1,Orysa4|Os05g29990.1,Orysa4|Os07g47700.1  
AT3G53520 Orysa4|Os01g62020.1,Orysa4|Os03g17230.1  
AT3G46440,AT5G59290,AT2G28760 Orysa4|Os03g16980.1  
AT2G28755  
AT2G38130 Orysa4|Os11g32280.1  
AT1G50030 Orysa4|Os05g14550.1  
AT3G09470 Orysa4|Os12g37920.1,Orysa4|Os12g37939.1  
AT2G46520 Orysa4|Os01g13430.1  
AT3G05625 Orysa4|Os01g24090.1  
Orysa4|Os06g11130.1,Orysa4|Os08g37060.1  
AT5G06570  
Orysa4|Os07g06850.1,Orysa4|Os03g57640.1,Orysa4|Os01g06210.1,Orysa4|Os01g06060.1,Orysa4|Os01  
g06220.1,Orysa4|Os07g06840.1,Orysa4|Os07g06830.1,Orysa4|Os07g06860.1  
Orysa4|Os10g40680.1  
Orysa4|Os05g33940.1  
AT3G63010,AT5G27320,AT3G05120 Orysa4|Os05g33730.1

AT5G62180,AT2G45610,AT2G45600 Orysa4|Os08g43430.1,Orysa4|Os03g14730.1  
Orysa4|Os03g15270.1  
AT1G49650,AT1G49660,AT1G49640,AT3G48700,AT3G48690,AT2G03550,AT1G19190  
AT5G23530 Orysa4|Os11g13670.1,Orysa4|Os11g13630.1,Orysa4|Os11g13570.1,Orysa4|Os07g41590.1,Orysa4|Os07  
g44850.1,Orysa4|Os07g44860.1,Orysa4|Os07g44900.1,Orysa4|Os06g20200.1,Orysa4|Os07g44890.1,Orysa4|Os07g  
44910.1  
AT1G68620 Orysa4|Os09g28760.1  
AT5G16080 Orysa4|Os02g36460.1,Orysa4|Os08g37010.1,Orysa4|Os05g34300.1  
Orysa4|Os11g04360.1,Orysa4|Os12g04150.1,Orysa4|Os12g04140.1,Orysa4|Os11g04350.1  
Orysa4|Os01g27350.1,Orysa4|Os02g35940.1,Orysa4|Os04g37680.1,Orysa4|Os01g43670.1,Orysa4|Os05  
g04080.1  
Orysa4|Os07g34240.1,Orysa4|Os07g34370.1,Orysa4|Os07g34170.1,Orysa4|Os09g26500.1,Orysa4|Os02  
g53960.1,Orysa4|Os07g31790.1,Orysa4|Os09g26510.1,Orysa4|Os09g28650.1,Orysa4|Os09g28640.1,Orysa4|Os09g  
28630.1,Orysa4|Os09g28620.1,Orysa4|Os09g28660.1,Orysa4|Os09g28230.1,Orysa4|Os09g28720.1,Orysa4|Os06g1  
1090.1,Orysa4|Os08g37050.1,Orysa4|Os08g37040.1,Orysa4|Os09g28690.1,Orysa4|Os08g37030.1,Orysa4|Os09g28  
740.1,Orysa4|Os09g28730.1  
Orysa4|Os03g57630.1  
AT1G47480 Orysa4|Os03g19640.1  
Orysa4|Os07g48070.1  
AT3G04650 Orysa4|Os12g40540.1  
AT5G57950 Orysa4|Os09g25310.1  
Orysa4|Os01g65080.1  
Orysa4|Os12g07280.1  
AT1G34370 Orysa4|Os03g62230.1  
Orysa4|Os08g44830.1  
AT5G20520 Orysa4|Os07g41730.1  
Orysa4|Os05g03030.1  
AT5G13510  
AT3G12370  
AT3G49250 Orysa4|Os01g13404.1  
AT1G18840,AT1G74690,AT2G02790,AT1G14380 Orysa4|Os01g51840.1  
AT2G26360,AT2G35800 Orysa4|Os11g01270.1  
AT2G44760 Orysa4|Os04g46100.1  
AT3G12760 Orysa4|Os06g12690.1  
AT4G04350 Orysa4|Os01g03020.1  
AT2G28390 Orysa4|Os01g74460.1  
AT3G54210 Orysa4|Os03g60100.1  
AT5G13030 Orysa4|Os06g21600.1  
AT4G37420 Orysa4|Os06g51210.1  
Orysa4|Os12g16690.1  
AT1G27200  
AT3G27330,AT5G40720 Orysa4|Os08g02850.1  
AT3G05675 Orysa4|Os07g47260.1  
AT4G10800 Orysa4|Os06g03840.1  
AT3G24810,AT5G48820,AT2G32710 Orysa4|Os01g37740.1,Orysa4|Os10g33310.1,Orysa4|Os02g52480.1  
AT3G25920 Orysa4|Os03g12020.1  
Orysa4|Os04g40670.1  
AT5G40500 Orysa4|Os04g53770.1  
AT1G13160,AT4G31520  
AT3G18100 Orysa4|Os07g04700.1  
Orysa4|Os07g04430.1  
Orysa4|Os07g04420.1  
AT4G25200,AT5G51440 Orysa4|Os02g52150.1,Orysa4|Os06g11610.1  
AT2G27310,AT2G36090,AT3G44326 Orysa4|Os12g06030.1,Orysa4|Os11g05660.1,Orysa4|Os02g33240.1,Orysa4|Os04g33820.1  
Orysa4|Os05g04950.1  
AT1G32530,AT2G35330 Orysa4|Os09g20550.1  
Orysa4|Os02g51050.1,Orysa4|Os05g07250.1,Orysa4|Os03g30220.1  
AT5G11690  
AT2G37410,AT1G20350 Orysa4|Os03g30200.1,Orysa4|Os07g41330.1  
Orysa4|Os06g09270.1  
AT5G57500 Orysa4|Os09g26300.1,Orysa4|Os09g26310.1,Orysa4|Os09g26320.1,Orysa4|Os05g47880.1,Orysa4|Os02  
g54390.1,Orysa4|Os02g54420.1,Orysa4|Os02g54450.1,Orysa4|Os02g54370.1,Orysa4|Os09g26330.1  
AT1G64850 Orysa4|Os04g51250.1,Orysa4|Os04g51240.1  
AT1G14730 Orysa4|Os03g50820.1  
AT5G38630 Orysa4|Os08g29520.1  
Orysa4|Os10g02920.1  
Orysa4|Os10g36030.1  
AT4G25570 Orysa4|Os02g42890.1,Orysa4|Os04g45090.1  
AT1G26100 Orysa4|Os08g01140.1  
AT3G54690 Orysa4|Os02g06360.1  
AT1G03780 Orysa4|Os07g32390.1  
AT5G44270

AT3G52600,AT2G36190  
Orysa4|Os03g52560.1,Orysa4|Os04g33720.1,Orysa4|Os02g33110.1,Orysa4|Os04g33740.1  
Orysa4|Os09g08120.1,Orysa4|Os09g08072.1,Orysa4|Os04g56920.1,Orysa4|Os04g56930.1,Orysa4|Os01  
g73580.1  
Orysa4|Os02g01590.1  
AT1G62660,AT1G12240  
AT3G13790,AT3G13784,AT1G55120,AT5G11920  
Orysa4|Os04g45290.1  
AT1G65030 Orysa4|Os12g42150.1  
AT1G02260 Orysa4|Os02g57620.1  
Orysa4|Os10g31040.1  
Orysa4|Os03g01700.1,Orysa4|Os10g39980.1  
AT2G39670 Orysa4|Os01g74190.1  
AT3G19630 Orysa4|Os03g10520.1  
AT1G60230 Orysa4|Os01g45370.1  
Orysa4|Os06g20970.1  
Orysa4|Os04g03884.1,Orysa4|Os07g33300.1  
AT2G05950  
Orysa4|Os01g05240.1  
Orysa4|Os11g27570.1  
Orysa4|Os11g27580.1  
AT3G61380,AT2G45900,AT4G00440 Orysa4|Os04g47180.1  
AT5G02390 Orysa4|Os01g05660.1,Orysa4|Os12g38260.1  
AT1G63670  
AT4G02405 Orysa4|Os07g14350.1  
AT5G27920 Orysa4|Os12g36670.1  
Orysa4|Os01g73750.1  
Orysa4|Os10g05800.1  
AT2G36370  
AT5G40470  
AT5G23340  
AT5G01720 Orysa4|Os12g01760.1,Orysa4|Os11g01780.1  
AT3G58530 Orysa4|Os02g17990.1  
AT1G80630  
AT1G79030 Orysa4|Os12g41820.1  
AT1G16680  
AT5G49580 Orysa4|Os03g61730.1  
Orysa4|Os06g41860.1,Orysa4|Os06g04540.1  
Orysa4|Os01g72450.1  
Orysa4|Os08g06320.1  
AT4G14465,AT3G04570 Orysa4|Os07g13100.1,Orysa4|Os08g44910.1,Orysa4|Os02g57520.1  
AT4G35390  
AT4G22810,AT4G12050,AT3G60870,AT2G45430,AT2G42940  
AT4G17800,AT2G35270 Orysa4|Os04g50030.1  
Orysa4|Os02g48320.1,Orysa4|Os06g22100.1  
AT1G14490,AT5G49700 Orysa4|Os09g28930.1  
AT3G55560 Orysa4|Os03g16350.1  
AT1G76500,AT1G20900  
AT4G26240 Orysa4|Os01g37850.1  
Orysa4|Os06g29430.1  
AT1G68720  
Orysa4|Os07g44660.1  
AT5G49650  
AT3G13226  
Orysa4|Os04g57230.1  
Orysa4|Os07g06820.1  
AT2G24990,AT5G37350  
AT5G62770,AT3G27880,AT1G23710,AT1G70420 Orysa4|Os02g04130.1  
AT5G12330 Orysa4|Os05g32070.1,Orysa4|Os01g72490.1  
AT4G36260,AT2G18120,AT5G33210,AT3G51060,AT5G66350,AT1G19790,AT1G75520,AT2G21400  
Orysa4|Os08g43410.1,Orysa4|Os09g36160.1,Orysa4|Os06g49830.1  
AT3G54430  
AT1G26665,AT5G41910 Orysa4|Os09g35920.1  
AT5G02680  
AT2G40660 Orysa4|Os01g60660.1  
AT4G13780 Orysa4|Os10g26050.1  
Orysa4|Os04g23820.1  
AT3G59980  
Orysa4|Os04g48410.1  
AT1G12520  
AT3G12775  
Orysa4|Os05g14300.1,Orysa4|Os01g13170.1  
Orysa4|Os01g12950.1,Orysa4|Os01g13280.1  
AT2G16920 Orysa4|Os01g03520.1  
Orysa4|Os05g06120.1  
AT1G53020,AT3G15355 Orysa4|Os01g48580.1,Orysa4|Os09g12310.1  
AT2G33770 Orysa4|Os05g48390.1  
AT1G55370 Orysa4|Os03g53710.1  
AT2G21370 Orysa4|Os07g22650.1  
Orysa4|Os08g18110.1  
AT3G56450,AT3G56190  
AT3G52230 Orysa4|Os01g73780.1

AT1G52600,AT3G15710 Orysa4|Os06g16260.1,Orysa4|Os05g23260.1  
Orysa4|Os05g49250.1  
AT1G75230,AT1G19480,AT3G50880 Orysa4|Os05g50290.1  
AT3G60740 Orysa4|Os10g36490.1  
Orysa4|Os03g34310.1  
Orysa4|Os05g38280.1  
AT5G64310,AT1G35230 Orysa4|Os06g28560.1  
AT3G24420  
Orysa4|Os05g51240.1,Orysa4|Os01g41240.1,Orysa4|Os05g08740.1  
AT3G03990 Orysa4|Os03g10620.1  
AT4G37470 Orysa4|Os03g32270.1  
AT3G14710,AT3G49150,AT3G59250,AT3G59240,AT3G59270,AT3G59180,AT5G41830,AT4G00320,AT5G41840,AT5  
G41630,AT4G14096,AT4G14103,AT1G58310,AT3G59170,AT3G59160,AT3G59200,AT3G59210,AT3G59230,AT1G56  
610,AT3G58860,AT3G58900,AT3G58910,AT3G03030,AT3G03040,AT3G58940,AT3G58930,AT3G58890,AT3G58950,  
AT3G58820,AT3G59000,AT1G52650,AT4G13960,AT5G38396,AT5G38390,AT5G38386,AT3G58880,AT3G59460,AT3  
G44180,AT1G47915,AT1G19070,AT1G47920,AT1G48390,AT1G48400,AT1G64540,AT5G35995,AT2G29910,AT2G29  
930,AT1G21990,AT4G27050,AT3G58870,AT5G12450,AT3G59190,AT3G58920,AT3G58980,AT3G58960,AT3G54160,  
AT3G62430,AT5G15620,AT3G62440,AT4G22280,AT1G06630,AT3G60040,AT2G42720,AT3G59150,AT3G44090,AT3  
G44080,AT3G44060,AT3G42770,AT3G44810,AT2G33796,AT3G42722,AT5G25860,AT5G40050  
Orysa4|Os01g57920.1  
AT5G19670,AT4G32790,AT5G25820,AT5G37000,AT5G11610  
AT5G03795 Orysa4|Os07g09050.1  
AT4G38040 Orysa4|Os06g43160.1,Orysa4|Os02g09430.1  
Orysa4|Os01g01780.1  
Orysa4|Os01g45350.1  
AT4G16745  
Orysa4|Os11g24300.1  
AT5G25310 Orysa4|Os06g07887.1,Orysa4|Os06g07987.1,Orysa4|Os04g01930.1  
AT3G07620  
AT5G33290,AT3G42180,AT5G20260,AT5G11130  
AT4G02620  
Orysa4|Os04g05080.1  
AT2G06010 Orysa4|Os04g36850.1  
AT5G14600 Orysa4|Os04g25990.1,Orysa4|Os04g25360.1,Orysa4|Os05g07830.1  
AT3G21580 Orysa4|Os05g33230.1  
AT1G79150  
AT1G79140 Orysa4|Os06g30320.1  
Orysa4|Os09g03500.1  
AT2G28200,AT3G10470,AT5G04390,AT5G03510,AT3G46080,AT3G46090,AT3G46070,AT5G59820,AT2G28710,AT3  
G53600,AT2G37430 Orysa4|Os02g57790.1,Orysa4|Os04g08060.1  
Orysa4|Os05g38620.1,Orysa4|Os01g62130.1,Orysa4|Os03g60540.1,Orysa4|Os05g38600.1,Orysa4|Os01  
g62190.1,Orysa4|Os03g60560.1,Orysa4|Os03g60570.1,Orysa4|Os11g47620.1  
AT5G57860 Orysa4|Os03g24920.1  
AT2G34170,AT1G29240,AT5G45850,AT4G18630,AT2G30990 Orysa4|Os01g55410.1  
AT4G32870,AT2G25770 Orysa4|Os05g11250.1,Orysa4|Os01g52570.1  
Orysa4|Os01g10210.1,Orysa4|Os05g11210.1,Orysa4|Os12g34470.1  
AT2G20050 Orysa4|Os02g17970.1  
AT3G06270 Orysa4|Os07g45170.1  
AT5G05240,AT2G40630 Orysa4|Os02g03940.1  
AT2G45640  
Orysa4|Os02g02960.1  
AT3G49910,AT5G67510 Orysa4|Os01g04730.1,Orysa4|Os12g05430.1  
AT3G46220 Orysa4|Os05g02650.1  
Orysa4|Os03g17050.1  
AT3G53680,AT2G37520  
AT2G27980,AT2G36720 Orysa4|Os06g51450.1,Orysa4|Os06g01170.1  
AT4G16570 Orysa4|Os06g01640.1  
AT3G15110 Orysa4|Os02g20490.1  
Orysa4|Os02g02150.1  
Orysa4|Os07g41570.1  
AT5G08110  
AT3G63160,AT3G52420 Orysa4|Os02g48480.1  
AT1G50400,AT3G20000 Orysa4|Os01g16910.1,Orysa4|Os03g20750.1  
AT5G52810 Orysa4|Os10g38930.1  
AT4G04330 Orysa4|Os08g32930.1  
AT4G10170,AT1G33480 Orysa4|Os08g01880.1  
AT5G55510,AT4G26670 Orysa4|Os12g33020.1,Orysa4|Os03g09870.1  
AT2G22780,AT5G09660 Orysa4|Os03g56280.1,Orysa4|Os12g43630.1  
Orysa4|Os01g61380.1,Orysa4|Os08g33720.1  
AT3G47520  
AT1G53240,AT3G15020 Orysa4|Os05g49880.1,Orysa4|Os01g46070.1  
Orysa4|Os07g43700.1  
AT3G53910  
AT2G32270,AT1G05300  
AT2G04032,AT1G31260,AT5G45105,AT4G19690,AT4G19680 Orysa4|Os03g46454.1,Orysa4|Os03g46470.1  
AT2G30080 Orysa4|Os05g07210.1  
AT3G12750,AT5G62160 Orysa4|Os05g39560.1,Orysa4|Os07g12890.1  
AT1G60960,AT1G10970,AT4G33020 Orysa4|Os05g10940.1  
AT3G19490,AT1G49810 Orysa4|Os09g02214.1  
Orysa4|Os05g50140.1  
AT5G16530 Orysa4|Os01g69070.1  
AT5G15100 Orysa4|Os01g51780.1

Orysa4|Os11g02950.1  
 AT1G73590 Orysa4|Os02g50960.1,Orysa4|Os06g12610.1  
 Orysa4|Os12g04000.1,Orysa4|Os11g04190.1  
 Orysa4|Os09g32770.1,Orysa4|Os08g41720.1  
 AT5G57090 Orysa4|Os06g44970.1  
 AT1G23080,AT1G70940,AT2G01420  
 Orysa4|Os01g58860.1  
 AT1G77110  
 AT3G24506,AT2G17240 Orysa4|Os02g40040.1  
 AT1G20330,AT1G76090 Orysa4|Os03g04340.1  
 AT1G48580 Orysa4|Os07g15500.1

A-M OGs in tree approach  
 ArabidopsisMoss  
 AT2G42220 Phypa1|28185  
 AT2G22900,AT4G37690  
 Phypa1|1011,Phypa1|36540,Phypa1|108,Phypa1|27291  
 AT4G38310 Phypa1|10558  
 Phypa1|8781  
 AT5G07720,AT1G18690,AT1G74380  
 Phypa1|39163,Phypa1|38296,Phypa1|37650,Phypa1|10878,Phypa1|15710,Phypa1|26823,Phypa1|25260,  
 Phypa1|25249,Phypa1|37010,Phypa1|28547,Phypa1|38283,Phypa1|38481,Phypa1|36971,Phypa1|27815,Phypa1|282  
 20,Phypa1|34706  
 AT3G62720,AT4G02500  
 Phypa1|33084,Phypa1|21704  
 AT2G33550 Phypa1|33461  
 AT5G45900 Phypa1|26868  
 AT4G10030 Phypa1|27280  
 AT3G04490 Phypa1|35412,Phypa1|29683  
 AT4G18940,AT4G18930 Phypa1|257,Phypa1|29662  
 AT1G20630,AT4G35090 Phypa1|39708,Phypa1|3732  
 Phypa1|39469  
 AT1G20620  
 Phypa1|19383,Phypa1|22970,Phypa1|37875,Phypa1|24506,Phypa1|17025,Phypa1|31462,Phypa1|2374,P  
 hypa1|30027  
 AT2G27900 Phypa1|30526,Phypa1|33538,Phypa1|33822  
 Phypa1|28151,Phypa1|29560,Phypa1|30409,Phypa1|36798  
 AT1G03830 Phypa1|5206  
 AT5G46070  
 Phypa1|29563  
 AT2G31490 Phypa1|2862,Phypa1|24251  
 AT1G02410 Phypa1|28222  
 AT3G12180,AT1G12340,AT1G12390,AT1G62880,AT4G12090 Phypa1|38815,Phypa1|33535  
 AT1G17470,AT1G72660 Phypa1|33557  
 AT4G39520 Phypa1|32194  
 AT1G27750 Phypa1|13628  
 AT5G35170 Phypa1|1853  
 AT5G47840 Phypa1|25003,Phypa1|29068  
 AT3G49890 Phypa1|32631  
 AT4G38220,AT1G44180,AT1G44820 Phypa1|34530,Phypa1|2503,Phypa1|38539  
 AT2G32050,AT3G43250,AT1G17130 Phypa1|29802  
 AT3G21330,AT5G67060,AT3G50330,AT5G09750,AT4G00120  
 Phypa1|2080,Phypa1|32977,Phypa1|18369,Phypa1|32831,Phypa1|33666,Phypa1|34264  
 AT2G40510,AT2G40590,AT3G56340 Phypa1|308,Phypa1|28584,Phypa1|38056  
 Phypa1|32158,Phypa1|36212  
 AT1G29370,AT1G29350,AT4G18150,AT5G46380 Phypa1|37003  
 AT1G54390 Phypa1|37455  
 AT3G24010 Phypa1|39510  
 AT1G16020,AT1G80910 Phypa1|34546  
 Phypa1|1118  
 AT4G35740  
 AT1G27880 Phypa1|29258  
 AT1G60930,AT1G10930 Phypa1|20  
 AT3G05740  
 AT1G31360 Phypa1|27339  
 Phypa1|33961  
 Phypa1|21560  
 AT2G35736 Phypa1|27281,Phypa1|27612,Phypa1|36429  
 AT1G22840,AT4G10040 Phypa1|36984,Phypa1|31786,Phypa1|37071,Phypa1|2744  
 AT1G17820,AT1G73200 Phypa1|34561,Phypa1|34924,Phypa1|32047,Phypa1|36374,Phypa1|27568  
 AT3G62110,AT3G06770,AT5G49215,AT3G16850  
 Phypa1|37542,Phypa1|1860,Phypa1|32038,Phypa1|985,Phypa1|29800  
 AT3G61490,AT4G23500,AT2G23900,AT3G48950  
 AT3G42950,AT1G19170 Phypa1|33100  
 AT4G23820,AT5G41870,AT4G33440  
 AT5G04600 Phypa1|2081,Phypa1|25802  
 AT3G43910,AT3G43900,AT2G26840 Phypa1|36511  
 AT2G17200,AT2G17190 Phypa1|28213,Phypa1|26795,Phypa1|935,Phypa1|16146  
 AT2G24580 Phypa1|20526,Phypa1|22944,Phypa1|37635  
 AT1G51110 Phypa1|32937  
 AT1G64520,AT5G42040 Phypa1|32824,Phypa1|36727  
 AT3G22630,AT4G14800 Phypa1|38594,Phypa1|36458,Phypa1|29053

AT1G15810,AT1G80620 Phypa1|35051  
 AT2G05370,AT3G49500 Phypa1|9  
 AT4G11130  
 AT1G14790 Phypa1|39241  
 AT5G10070 Phypa1|675  
 AT3G62010 Phypa1|23962,Phypa1|38857  
 AT1G08580 Phypa1|13536,Phypa1|31839  
 Phypa1|30473  
 Phypa1|35044  
 AT3G11630,AT5G06290 Phypa1|38421  
 AT5G38510 Phypa1|31785,Phypa1|97  
 AT5G09380,AT4G25180 Phypa1|32323  
 Phypa1|38209  
 AT5G23430,AT5G08390,AT1G11160,AT1G61210 Phypa1|946  
 Phypa1|27495  
 Phypa1|785  
 AT1G35680,AT4G30930 Phypa1|3377  
 Phypa1|30040,Phypa1|31331  
 Phypa1|35851  
 AT1G24360  
 Phypa1|22180  
 Phypa1|38523,Phypa1|29795  
 AT2G29170,AT2G29150,AT2G29370,AT2G29360,AT2G29290,AT2G29350,AT2G29320,AT2G29300,AT2G29310,AT2  
 G29340,AT2G29330,AT2G30670,AT1G07450,AT1G07440  
 AT2G29260,AT5G06060 Phypa1|39745  
 Phypa1|31135  
 Phypa1|31419  
 Phypa1|31430,Phypa1|21729,Phypa1|31109,Phypa1|30459,Phypa1|31358  
 AT4G05530 Phypa1|38450  
 Phypa1|30495,Phypa1|31087,Phypa1|22876,Phypa1|30925  
 Phypa1|31453  
 AT5G01300 Phypa1|1196,Phypa1|27675  
 AT3G29380,AT4G10680,AT5G39230,AT3G57370,AT3G10330,AT2G41630 Phypa1|25717,Phypa1|28280  
 AT5G58200 Phypa1|29476  
 Phypa1|31190  
 AT1G16740 Phypa1|28340  
 AT1G30130 Phypa1|29847  
 AT4G10360,AT4G19645,AT1G31300 Phypa1|26552,Phypa1|24340  
 AT5G50120,AT1G24130,AT1G24530,AT3G18950,AT1G49450,AT4G34380,AT2G26490,AT1G47610,AT3G50390,AT3  
 G51930 Phypa1|32515  
 AT1G06720 Phypa1|14776,Phypa1|37385  
 AT4G34260 Phypa1|39231  
 Phypa1|22911,Phypa1|22942,Phypa1|23622  
 AT4G13750 Phypa1|39394  
 AT4G10620 Phypa1|942  
 AT3G57180 Phypa1|31299  
 AT5G65890,AT5G25320,AT1G69040,AT2G03730,AT3G01990,AT1G12420,AT4G22780,AT1G76990  
 Phypa1|28776,Phypa1|38737,Phypa1|25808,Phypa1|37088,Phypa1|27821  
 AT5G50680,AT5G50580,AT4G24940 Phypa1|32232  
 AT3G52610 Phypa1|29932,Phypa1|36297,Phypa1|30276,Phypa1|35876  
 AT1G24560,AT3G49055 Phypa1|32025  
 AT1G06470 Phypa1|12233,Phypa1|5704,Phypa1|24300  
 AT4G10970,AT4G23910 Phypa1|32662  
 Phypa1|29020,Phypa1|7378  
 AT3G03940,AT5G18190,AT3G03930  
 AT2G25760  
 AT3G13670 Phypa1|38700,Phypa1|33975  
 Phypa1|7381  
 AT3G01120,AT1G33320 Phypa1|28343,Phypa1|26227  
 Phypa1|36772  
 Phypa1|30938  
 Phypa1|30900  
 Phypa1|30944  
 AT3G57050  
 Phypa1|31330,Phypa1|30839  
 AT1G67325 Phypa1|28215  
 AT4G35987,AT4G35990 Phypa1|24558  
 AT4G18590,AT3G52630 Phypa1|38344  
 AT3G14950,AT1G53300,AT3G58620,AT2G42580,AT1G78120,AT5G10090,AT5G65160  
 Phypa1|29970,Phypa1|28582,Phypa1|36381  
 AT2G41760 Phypa1|38989  
 AT1G17680 Phypa1|35999  
 AT2G41835,AT3G57480,AT5G48205,AT3G28210 Phypa1|1582,Phypa1|224,Phypa1|27105  
 AT1G62020,AT2G21390 Phypa1|39090,Phypa1|38847,Phypa1|36035  
 AT5G16810 Phypa1|28122  
 AT5G24260 Phypa1|23817,Phypa1|23685  
 AT5G59440 Phypa1|29173  
 AT4G35980 Phypa1|32848  
 AT4G36100,AT2G30380,AT4G34080,AT2G45260,AT4G33320,AT5G58960,AT3G60680,AT1G53380,AT3G14870,AT1  
 G29300,AT2G32130 Phypa1|366  
 AT3G60910 Phypa1|29735  
 AT3G17365 Phypa1|24374,Phypa1|29833



Phypa1|3476  
 AT1G79990,AT3G15980,AT1G52360 Phypa1|33404,Phypa1|29365,Phypa1|38664  
 AT1G69390 Phypa1|23688,Phypa1|8277,Phypa1|37935  
 AT1G24320,AT1G67490 Phypa1|31763  
 AT4G01750,AT4G01770,AT1G56550,AT4G01220 Phypa1|25229  
 AT4G17050 Phypa1|36272  
 Phypa1|4850  
 AT1G05120,AT1G02670  
 AT5G22750 Phypa1|23786  
 AT5G43530  
 Phypa1|38758  
 AT3G20010,AT1G50410,AT3G16600  
 Phypa1|24521,Phypa1|39074  
 AT1G61140,AT1G11100  
 AT1G69100,AT4G22050,AT1G11910,AT1G62290,AT4G04460 Phypa1|37002,Phypa1|36953  
 AT1G25290 Phypa1|35272  
 AT3G59500,AT1G30890 Phypa1|29017,Phypa1|28099  
 AT2G35700,AT4G16750  
 AT5G19790  
 Phypa1|29663,Phypa1|28250,Phypa1|25114,Phypa1|25038  
 Phypa1|28768  
 AT1G75490  
 AT3G61630,AT2G46310 Phypa1|30262  
 AT3G57600 Phypa1|28480  
 Phypa1|7646  
 Phypa1|383  
 AT4G39780,AT2G22200,AT5G65130  
 AT2G47520  
 Phypa1|25261  
 Phypa1|26530  
 Phypa1|1739  
 AT1G19210,AT1G74930,AT5G21960  
 Phypa1|2205,Phypa1|26526,Phypa1|1232,Phypa1|1123,Phypa1|1158,Phypa1|35843,Phypa1|2085,Phypa  
 1|2105,Phypa1|1737,Phypa1|36595,Phypa1|2206,Phypa1|290  
 AT1G36060,AT1G71130  
 AT3G23240 Phypa1|25218  
 Phypa1|1331  
 AT2G20880 Phypa1|30156  
 AT1G15360,AT5G25390,AT5G11190 Phypa1|24428,Phypa1|24430  
 AT2G20350,AT5G67010,AT5G67000,AT1G12890 Phypa1|28136  
 Phypa1|1628,Phypa1|1629,Phypa1|1738,Phypa1|36094  
 AT1G28360  
 AT5G18560  
 AT1G72360  
 AT5G43410,AT1G04370,AT3G23220,AT2G38340  
 AT5G50080  
 Phypa1|384  
 Phypa1|889  
 Phypa1|288  
 Phypa1|885  
 AT4G31060,AT1G01250  
 AT4G17500,AT5G47220 Phypa1|1335  
 AT2G31230,AT1G06160  
 AT1G71450,AT1G33760 Phypa1|26031,Phypa1|37838,Phypa1|25076,Phypa1|1741,Phypa1|28721  
 Phypa1|830  
 AT1G03800  
 Phypa1|303,Phypa1|2201,Phypa1|37733  
 Phypa1|29268,Phypa1|28857,Phypa1|26630  
 Phypa1|30212  
 AT5G25810,AT5G11590,AT2G25820,AT4G32800,AT1G77200  
 AT5G13910 Phypa1|29559  
 Phypa1|39447,Phypa1|35600  
 AT1G80580 Phypa1|388  
 Phypa1|24606  
 AT4G13620,AT1G64380  
 Phypa1|1550,Phypa1|5793  
 Phypa1|1334  
 AT2G40220 Phypa1|1735  
 Phypa1|890  
 Phypa1|25603  
 Phypa1|25291  
 Phypa1|12710,Phypa1|31492  
 Phypa1|886  
 AT4G18450 Phypa1|1206  
 AT2G33710  
 AT5G07310,AT5G61890,AT1G22985,AT5G13330  
 AT5G64750 Phypa1|884  
 AT1G53910,AT3G14230 Phypa1|294  
 AT1G12980 Phypa1|26359,Phypa1|26829  
 Phypa1|27785  
 AT1G28160  
 Phypa1|1336

Phypa1|1736  
Phypa1|1333  
Phypa1|1217  
AT4G17490,AT5G47230 Phypa1|30888  
Phypa1|1325  
AT4G34410 Phypa1|1324  
AT5G51190  
AT4G23750,AT4G11140  
AT5G25190 Phypa1|10503,Phypa1|36611,Phypa1|1186  
Phypa1|26898  
AT1G22810,AT1G71520,AT4G25470,AT4G25480,AT4G25490,AT5G51990,AT1G63030,AT1G12610,AT2G36450,AT1  
G12630,AT5G52020  
Phypa1|29783  
AT3G16280  
Phypa1|2161  
AT2G44940,AT3G60490  
Phypa1|1327  
AT4G28140  
AT1G77640,AT1G21910,AT1G44830 Phypa1|1703  
AT5G61600  
Phypa1|37185,Phypa1|490,Phypa1|27907,Phypa1|28294  
AT3G16770 Phypa1|25604  
AT2G40350,AT2G40340,AT5G05410,AT3G11020  
AT5G18450 Phypa1|769  
AT1G78080,AT1G22190  
AT3G23230  
Phypa1|24735  
AT3G25890,AT1G25470,AT1G68550  
AT3G20310,AT1G50640,AT5G61590,AT5G07580,AT2G44840  
Phypa1|1220  
AT2G23340,AT4G36900,AT3G50260,AT5G67190,AT4G06746,AT1G46768  
Phypa1|385  
AT5G53290,AT4G27950  
AT1G49120 Phypa1|27704  
Phypa1|1337  
AT5G44210 Phypa1|891  
Phypa1|1330  
AT1G28370,AT3G15210,AT1G53170,AT1G43160  
AT1G24590 Phypa1|1740  
Phypa1|1601  
AT5G53970,AT5G36160,AT4G28420,AT2G20610,AT4G28410,AT2G24850,AT4G23600,AT4G23590  
Phypa1|39031  
AT5G22320 Phypa1|32083  
AT3G49600 Phypa1|25082  
Phypa1|29562  
AT5G60750 Phypa1|30854  
Phypa1|30843  
Phypa1|3101,Phypa1|30763,Phypa1|21488,Phypa1|30808  
AT2G47510,AT5G50950 Phypa1|23694,Phypa1|36512  
AT4G34460 Phypa1|23748,Phypa1|24706  
AT4G10300,AT4G28703,AT3G04300,AT4G10290,AT4G10280 Phypa1|29062  
AT1G42440 Phypa1|25593  
AT4G02450,AT3G03773 Phypa1|2359,Phypa1|36653,Phypa1|3389,Phypa1|845  
AT5G52220 Phypa1|835  
AT1G04635 Phypa1|24171  
AT1G24470,AT1G67730 Phypa1|23778  
Phypa1|10929  
AT5G51080,AT3G01410 Phypa1|16884  
Phypa1|720  
AT1G24090  
AT5G16610 Phypa1|26252,Phypa1|30070  
AT2G21290 Phypa1|33490  
AT5G19420,AT5G12350 Phypa1|27935,Phypa1|27946,Phypa1|26295  
AT1G65920  
AT3G26100  
AT5G60870 Phypa1|38597  
Phypa1|29233  
AT5G63860 Phypa1|6044,Phypa1|37757  
AT3G15430 Phypa1|35313  
AT1G27060 Phypa1|29960  
Phypa1|33189  
AT3G23270,AT4G14370,AT1G76950,AT5G42140  
AT3G47660  
AT3G02510,AT5G16040  
AT3G02300  
AT1G69710  
AT5G48330 Phypa1|18905  
AT5G08710 Phypa1|26752  
AT3G20320 Phypa1|28469,Phypa1|29390  
AT1G48030,AT3G17240 Phypa1|18309,Phypa1|23890  
Phypa1|30899  
AT4G12740 Phypa1|34148

Phypa1|22710  
AT4G21320 Phypa1|32428,Phypa1|35018  
AT2G31170Phypa1|30960  
AT3G56300,AT5G38830  
Phypa1|23551,Phypa1|22794,Phypa1|32162,Phypa1|33459  
AT2G48110,AT3G23590 Phypa1|27591,Phypa1|25357  
AT2G21340,AT4G39030 Phypa1|26175,Phypa1|26474,Phypa1|37301,Phypa1|20615,Phypa1|34078  
AT5G02770 Phypa1|33915  
AT1G44910,AT3G19670 Phypa1|11811,Phypa1|34379,Phypa1|11812  
AT5G58740 Phypa1|37310  
AT3G45050 Phypa1|31563  
AT2G45480,AT2G36400,AT4G24150,AT5G53660,AT2G06200,AT4G37740,AT2G22840 Phypa1|1558  
Phypa1|2098  
AT1G34780,AT4G08930 Phypa1|1988  
AT5G06160 Phypa1|37658  
AT1G72220  
AT2G18650,AT4G30400,AT5G57750  
AT5G46650 Phypa1|1300  
AT3G61460,AT1G63840,AT4G11360  
Phypa1|15722  
AT5G40250,AT1G23980  
Phypa1|315  
Phypa1|28535,Phypa1|26865,Phypa1|2133,Phypa1|855  
AT3G60220  
AT4G20150 Phypa1|875,Phypa1|36362  
AT1G07080,AT4G12870,AT4G12900,AT4G12890,AT4G12960,AT5G01580 Phypa1|30065,Phypa1|24187  
AT1G35220 Phypa1|32066,Phypa1|32319  
AT4G11570Phypa1|27040,Phypa1|1944  
AT2G10950,AT1G10720,AT3G49800,AT5G65910 Phypa1|31757  
AT1G61150,AT1G11110,AT4G09300 Phypa1|29583,Phypa1|30359,Phypa1|25670  
AT1G63810 Phypa1|32927  
AT1G03260,AT5G19070 Phypa1|25932,Phypa1|183,Phypa1|30577  
AT3G18380,AT1G15215 Phypa1|26100  
AT5G18180,AT3G03920 Phypa1|27983,Phypa1|34866  
AT3G17790,AT2G01890,AT1G14700,AT1G25230,AT2G01880 Phypa1|33523,Phypa1|24855,Phypa1|27178  
AT3G62810 Phypa1|38361  
Phypa1|30474  
Phypa1|2357  
Phypa1|2408  
AT2G45440,AT3G60880 Phypa1|25348,Phypa1|26962  
AT1G15080,AT3G18220,AT3G02600,AT2G01180  
Phypa1|2060,Phypa1|37744,Phypa1|1465,Phypa1|32379,Phypa1|1085,Phypa1|24534  
AT5G58920 Phypa1|37793  
AT1G61700,AT1G11475 Phypa1|38967  
AT3G27530 Phypa1|38061  
AT3G49460,AT5G24510,AT5G47700,AT1G01100,AT4G00810  
Phypa1|32245,Phypa1|33261,Phypa1|26226,Phypa1|28351,Phypa1|39086,Phypa1|25744  
AT5G17410 Phypa1|37617,Phypa1|27874,Phypa1|29167  
AT3G15351 Phypa1|25662  
AT2G21500,AT4G39140,AT1G19680,AT1G75400 Phypa1|32042,Phypa1|34466  
AT3G23980 Phypa1|25120,Phypa1|4424,Phypa1|1884  
AT1G15140 Phypa1|33021,Phypa1|1087  
Phypa1|31717  
AT1G78140 Phypa1|30942,Phypa1|30736  
AT2G41040 Phypa1|29382  
AT2G12280,AT2G12200,AT1G50480 Phypa1|30848,Phypa1|34823  
AT2G42510,AT1G54380 Phypa1|31942  
AT4G04940 Phypa1|34678  
AT2G20930 Phypa1|39735,Phypa1|24217  
AT4G16360,AT5G21170,AT2G28060 Phypa1|36055,Phypa1|38878  
AT1G70190,AT2G03130,AT4G36420,AT3G06040,AT4G37660  
Phypa1|39661,Phypa1|782,Phypa1|6292,Phypa1|2121  
AT2G36550,AT2G36540,AT4G26190,AT3G29760 Phypa1|29143  
Phypa1|25487,Phypa1|38384  
AT3G48190 Phypa1|13616  
AT4G35930 Phypa1|1540,Phypa1|31998,Phypa1|32627,Phypa1|32159  
AT5G34850,AT3G46120,AT2G18130,AT1G52940,AT4G36350,AT1G56360,AT2G16430,AT2G27190  
Phypa1|25694,Phypa1|39409  
AT4G18372 Phypa1|1314  
AT4G33120,AT4G33110 Phypa1|36733  
Phypa1|7997  
Phypa1|6045  
AT4G17520,AT5G47210,AT4G16830 Phypa1|32771,Phypa1|24261,Phypa1|2564  
AT1G65820 Phypa1|37492,Phypa1|39692,Phypa1|28730,Phypa1|33843  
AT3G09085 Phypa1|6412,Phypa1|33735  
AT5G66410,AT3G50960 Phypa1|36709  
AT4G11820Phypa1|23949,Phypa1|39244  
AT4G04920 Phypa1|37631  
AT3G08650 Phypa1|38253  
AT3G01380 Phypa1|26740  
AT5G36140,AT5G36110,AT5G36130 Phypa1|25145  
AT3G19260 Phypa1|10771,Phypa1|28128

Phypa1|34390,Phypa1|15298  
AT3G25540,AT1G13580 Phypa1|28326,Phypa1|25399,Phypa1|24993  
AT1G33330 Phypa1|6803  
AT5G42480 Phypa1|28813,Phypa1|37750  
Phypa1|23952,Phypa1|28475  
AT5G55310,AT5G55300 Phypa1|14648  
AT4G31490,AT4G31480 Phypa1|39220,Phypa1|39568,Phypa1|32675  
AT5G23670,AT3G48780,AT3G48790  
Phypa1|30592,Phypa1|31483,Phypa1|31049,Phypa1|4213,Phypa1|30345  
AT2G44050 Phypa1|38270,Phypa1|38620  
AT3G51730,AT5G01800 Phypa1|709,Phypa1|714  
AT5G48600 Phypa1|24475  
AT5G62410,AT3G47460 Phypa1|26322  
AT3G28925  
AT2G32760 Phypa1|35120  
AT5G11680Phypa1|38533  
AT5G16350,AT5G12420,AT5G53380,AT5G22490,AT3G49210,AT3G49200,AT3G49190,AT2G43255,AT2G38995,AT5  
G37300,AT1G72110,AT5G53390 Phypa1|29688  
Phypa1|20520,Phypa1|22545,Phypa1|22608,Phypa1|23345  
AT3G13070,AT1G55930 Phypa1|33034,Phypa1|38185,Phypa1|28272  
AT5G65220 Phypa1|1205,Phypa1|1612  
AT3G19553 Phypa1|29812,Phypa1|29321,Phypa1|29931  
AT1G31830,AT1G31820,AT5G05630  
AT3G13620  
Phypa1|14073,Phypa1|17986  
AT5G41820,AT4G24490 Phypa1|34033  
AT1G48760 Phypa1|29240  
AT4G36850 Phypa1|31992,Phypa1|31735  
AT4G20100,AT2G41050 Phypa1|36013  
AT1G05370,AT3G22410 Phypa1|10639,Phypa1|19135,Phypa1|33555,Phypa1|9076,Phypa1|10638  
AT2G46915 Phypa1|1767  
AT4G10770,AT5G53510,AT4G27730,AT5G53520 Phypa1|38879  
AT1G09930,AT5G64410  
AT5G55930,AT4G26590  
AT4G16370 Phypa1|14074  
AT3G60600,AT2G45140,AT5G47180,AT1G51270,AT2G23830,AT1G08820,AT4G00170  
Phypa1|4408,Phypa1|36460,Phypa1|29642  
AT4G24550 Phypa1|27259  
AT1G60780,AT1G10730 Phypa1|24065,Phypa1|35419  
AT5G46630 Phypa1|38618,Phypa1|39293  
AT5G13500,AT5G25265,AT2G25260 Phypa1|38586,Phypa1|39138  
Phypa1|21979  
AT1G73990 Phypa1|917  
Phypa1|6690  
AT4G16420,AT3G07740 Phypa1|25179,Phypa1|35759  
AT5G24690 Phypa1|26459,Phypa1|973,Phypa1|29899,Phypa1|3035  
AT2G42450  
Phypa1|12592,Phypa1|33711,Phypa1|31805,Phypa1|34913,Phypa1|34461,Phypa1|11892,Phypa1|35092  
AT3G05480 Phypa1|27910,Phypa1|28015  
AT4G17540 Phypa1|34744  
AT1G49975 Phypa1|35656  
AT5G64740,AT5G09870,AT2G21770,AT4G39350  
AT5G17420  
Phypa1|38199,Phypa1|38971,Phypa1|2666,Phypa1|23752,Phypa1|37523,Phypa1|37524,Phypa1|34735,P  
hypa1|38872,Phypa1|25542,Phypa1|25109  
AT4G24000,AT4G24010,AT4G23990  
AT2G32540,AT2G32530,AT2G32610,AT2G32620,AT4G15320,AT4G15290  
AT5G44030,AT4G18780  
AT1G02730  
AT5G05170,AT4G32410,AT2G25540  
Phypa1|9121  
AT1G55850  
Phypa1|25941  
AT2G33100  
Phypa1|33887  
AT1G32180  
Phypa1|867  
AT5G16910,AT3G03050,AT4G38190  
Phypa1|36608,Phypa1|29902,Phypa1|37742,Phypa1|33789,Phypa1|24047,Phypa1|36732,Phypa1|38965,  
Phypa1|29364  
Phypa1|18016,Phypa1|28779  
AT5G23310 Phypa1|23732,Phypa1|1132  
Phypa1|33660  
AT5G51100,AT4G25100  
AT2G16500,AT4G34710 Phypa1|36080,Phypa1|36433,Phypa1|34093  
Phypa1|8034  
AT4G38890 Phypa1|29122  
AT5G48190,AT3G60990,AT3G07380,AT4G20170,AT5G44670,AT2G33570  
Phypa1|81,Phypa1|497,Phypa1|25421,Phypa1|17077,Phypa1|33545,Phypa1|35682,Phypa1|31026,Phypa  
1|27686,Phypa1|25788,Phypa1|25650,Phypa1|494,Phypa1|39392,Phypa1|38477  
AT3G03490,AT5G17550 Phypa1|350  
AT5G50320 Phypa1|15014,Phypa1|28755

AT1G32220 Phypa1|28394,Phypa1|27511  
AT5G10730,AT5G15910 Phypa1|2009  
Phypa1|2012  
AT4G17770,AT1G68020  
AT1G06410 Phypa1|11083,Phypa1|38822,Phypa1|37362,Phypa1|33422  
AT1G78580 Phypa1|27777,Phypa1|12  
AT1G23870,AT1G70290,AT1G60140,AT2G18700  
AT1G17000,AT1G16980,AT4G27550  
AT5G55900,AT4G26620,AT3G27570,AT5G40510 Phypa1|35945,Phypa1|30837  
AT5G55610 Phypa1|14183  
AT3G19990 Phypa1|33255  
Phypa1|29979  
AT1G22380,AT1G22360,AT1G22400,AT1G22340,AT1G22370,AT1G78270  
Phypa1|22443  
Phypa1|1177  
AT5G59590,AT5G59580,AT3G46650,AT3G46680,AT3G46720,AT3G46690,AT3G46700,AT3G46670,AT3G46660,AT5G37950,AT5G38010,AT5G38040,AT2G26480,AT3G55710,AT3G55700,AT5G05900,AT5G05880,AT5G05890,AT5G05860,AT5G05870,AT3G11340,AT5G17040,AT5G17030,AT5G17050,AT1G30530,AT1G24100,AT2G43840,AT2G43820,AT2G31790,AT1G05680,AT2G31750,AT4G15500,AT4G15490,AT3G21560,AT4G15480,AT2G23210,AT2G23250,AT2G23260,AT1G05530,AT1G05560,AT4G15550,AT4G14090,AT2G28080,AT2G36970,AT2G30150,AT2G30140  
Phypa1|1562  
Phypa1|26869  
AT4G15270  
AT2G36770,AT2G36780,AT2G36760,AT2G36800,AT2G36790,AT2G36750,AT3G53160,AT3G53150,AT4G34131,AT4G34135,AT4G34138,AT2G15490,AT2G15480,AT2G16890,AT5G14860,AT1G51210,AT5G03490,AT1G73880,AT1G06000,AT5G12890,AT2G22590,AT5G65550,AT5G49690,AT1G64910,AT1G64920,AT5G53990,AT4G09500,AT2G22930,AT5G54010,AT4G27570,AT4G27560,AT1G50580,AT3G29630,AT5G54060  
Phypa1|37612  
AT3G02100,AT3G22250  
AT1G10400  
Phypa1|27332  
Phypa1|1518  
Phypa1|39428  
AT5G66690,AT5G26310,AT3G50740,AT2G18570,AT2G18560,AT4G36770,AT1G01420,AT1G01390,AT4G01070,AT3G16520,AT4G15260,AT4G15280,AT3G21790,AT3G21800,AT3G21780,AT3G21760,AT3G21750,AT2G29750,AT2G29740,AT1G07260,AT1G07250,AT1G07240,AT2G29710,AT2G29730  
Phypa1|92,Phypa1|32773,Phypa1|4970,Phypa1|26163,Phypa1|32724,Phypa1|37149  
Phypa1|988,Phypa1|35951  
AT2G11890Phypa1|35422,Phypa1|34954  
AT1G53900,AT1G53880,AT1G72340,AT1G53870,AT1G53890,AT3G14260,AT1G63410  
Phypa1|36848,Phypa1|27329,Phypa1|33624  
AT4G31080,AT2G24330,AT4G31090 Phypa1|28618,Phypa1|2269  
AT4G13080,AT4G13090,AT3G25050,AT3G48580  
Phypa1|1501  
Phypa1|35338  
AT5G13870,AT2G06850,AT4G03210,AT4G37800,AT5G65730  
Phypa1|38502,Phypa1|1502  
AT4G25810,AT5G57560,AT4G30270,AT4G30280,AT1G65310,AT4G30290,AT5G48070,AT2G18800,AT5G57550,AT3G23730,AT4G14130,AT5G57540,AT5G57530,AT4G25820,AT4G28850  
Phypa1|29901,Phypa1|39361,Phypa1|27866,Phypa1|24105,Phypa1|14556,Phypa1|39182,Phypa1|2483,P  
hypa1|39763,Phypa1|27055,Phypa1|28178  
AT2G36870,AT3G44990  
AT2G14620 Phypa1|28566,Phypa1|24562,Phypa1|24072,Phypa1|24421,Phypa1|37433  
Phypa1|30239  
AT1G11545  
Phypa1|29769,Phypa1|22183,Phypa1|28828,Phypa1|27242  
AT1G10550 Phypa1|1462,Phypa1|24622  
Phypa1|24533,Phypa1|39570,Phypa1|6123,Phypa1|29629,Phypa1|39569,Phypa1|1509,Phypa1|25241  
AT2G01850,AT1G14720,AT1G32170,AT4G18990  
Phypa1|24852,Phypa1|34556,Phypa1|1492,Phypa1|26219  
AT1G31870 Phypa1|2705  
AT2G27930  
AT1G32700,AT4G17900,AT5G46710  
AT3G60670,AT2G12646 Phypa1|24516,Phypa1|24501,Phypa1|35779,Phypa1|39784  
AT2G17785,AT1G31040  
AT1G21000,AT1G76590,AT1G43000  
Phypa1|24682,Phypa1|24341,Phypa1|11891,Phypa1|37228,Phypa1|25780  
Phypa1|712,Phypa1|236,Phypa1|16372,Phypa1|699,Phypa1|700  
AT4G03090 Phypa1|16713  
AT3G21350 Phypa1|2053  
AT2G28360,AT1G07990,AT3G45190,AT1G30470 Phypa1|1758,Phypa1|27682,Phypa1|1354,Phypa1|37518  
AT5G19280 Phypa1|27646  
AT4G36530 Phypa1|26428  
Phypa1|38482  
AT5G19850 Phypa1|30984  
AT5G20350,AT2G14255,AT2G14250 Phypa1|1474,Phypa1|39128  
AT3G18270 Phypa1|36808  
AT1G07110Phypa1|2947,Phypa1|3051,Phypa1|29350,Phypa1|37648  
Phypa1|33582  
Phypa1|33872  
AT4G22830  
AT5G02130 Phypa1|11639

AT1G56345 Phypa1|26812,Phypa1|28041  
 AT1G01290 Phypa1|37426  
     Phypa1|31166  
 AT2G14835 Phypa1|24182,Phypa1|24049  
 AT1G05790 Phypa1|29303,Phypa1|28850  
 AT5G05310 Phypa1|2888  
 AT1G21065 Phypa1|27828,Phypa1|39681  
 AT5G04980,AT5G65090,AT1G05470,AT2G32010,AT3G63240,AT2G37440  
 AT1G47510 Phypa1|31974,Phypa1|149  
 AT2G01900 Phypa1|3026,Phypa1|1817,Phypa1|29453,Phypa1|24897,Phypa1|25502,Phypa1|2504  
 AT4G18010  
 AT1G71710,AT1G34120  
     Phypa1|1472,Phypa1|1473,Phypa1|1471  
 AT1G07380,AT5G58980,AT2G38010 Phypa1|2502,Phypa1|17127  
 AT3G16760 Phypa1|35528,Phypa1|18653  
 AT1G65270 Phypa1|32806  
 AT1G13560,AT3G25585 Phypa1|37814,Phypa1|26729  
 AT2G41880,AT3G57550  
     Phypa1|28251,Phypa1|39326,Phypa1|29732,Phypa1|26152,Phypa1|20338,Phypa1|30776  
 AT1G50240 Phypa1|26344  
 AT5G02720,AT3G53490 Phypa1|24695,Phypa1|38696  
 AT2G28860,AT2G28850,AT2G34500,AT2G34490 Phypa1|30702,Phypa1|38346  
 AT2G03120 Phypa1|26195,Phypa1|36481,Phypa1|2296,Phypa1|34999  
     Phypa1|100,Phypa1|505  
     Phypa1|19910  
 AT4G16045  
 AT1G04300,AT5G43560,AT5G52330  
     Phypa1|30431,Phypa1|30922,Phypa1|20874,Phypa1|31193  
 AT5G12040 Phypa1|38348,Phypa1|27059  
 AT2G27750,AT5G05210 Phypa1|7052  
 AT4G24590,AT5G49710 Phypa1|3421  
 AT3G10150 Phypa1|28496  
 AT4G08580,AT5G17900 Phypa1|31859  
 AT4G03175 Phypa1|29040  
 AT4G35500,AT2G17530  
 AT5G22840,AT3G44850,AT3G53030 Phypa1|63,Phypa1|965,Phypa1|975  
 AT5G09860 Phypa1|35979  
     Phypa1|3271  
 AT3G04970 Phypa1|26966  
 AT3G18620 Phypa1|584,Phypa1|19095  
 AT5G05070,AT3G56920,AT2G40990,AT3G56930  
 AT3G09320 Phypa1|26714,Phypa1|1476  
 AT5G04270  
     Phypa1|27030,Phypa1|28529,Phypa1|36681,Phypa1|4726  
 AT5G50020,AT4G24630  
 AT5G41060,AT3G26935,AT3G48760 Phypa1|29007,Phypa1|25473,Phypa1|2603  
 AT3G18430 Phypa1|39348  
 AT4G27120 Phypa1|32626  
 AT5G47540,AT4G17270 Phypa1|34851,Phypa1|38725  
 AT2G03410  
 AT5G18940 Phypa1|2970,Phypa1|29844  
 AT4G33210 Phypa1|28707,Phypa1|25353,Phypa1|36479,Phypa1|37861,Phypa1|33468  
 AT2G34090 Phypa1|22864,Phypa1|25115  
 AT1G71990 Phypa1|39162  
 AT5G34930  
 AT1G15710  
     Phypa1|28572  
     Phypa1|26429,Phypa1|1028,Phypa1|540,Phypa1|552  
 AT3G01880,AT3G01870,AT2G44230,AT2G44260,AT5G18490,AT3G04350,AT1G04090,AT5G43950  
     Phypa1|29983,Phypa1|28894,Phypa1|8367  
 AT5G03300,AT3G09820 Phypa1|2509,Phypa1|36792  
     Phypa1|20926  
 AT3G10200,AT5G04060  
 AT1G78240,AT2G03480,AT1G13860 Phypa1|30572  
 AT3G56080  
 AT3G03370  
 AT1G31850,AT4G19120 Phypa1|39065,Phypa1|32704  
 AT4G00740 Phypa1|37375,Phypa1|38997  
 AT4G10440,AT1G33170 Phypa1|38543,Phypa1|19716,Phypa1|29567,Phypa1|37719,Phypa1|6898  
 AT2G43200  
 AT1G26850,AT4G18030  
 AT2G40280  
 AT4G00750,AT2G45750  
 AT5G14430,AT3G23300,AT4G14360,AT1G04430  
     Phypa1|24609,Phypa1|28177,Phypa1|37952,Phypa1|37326  
 AT2G39750,AT5G06050,AT1G77260 Phypa1|2617,Phypa1|27330  
     Phypa1|6897  
 AT3G51070,AT1G29470,AT2G34300,AT5G64030  
     Phypa1|37859,Phypa1|27461,Phypa1|36014,Phypa1|36860,Phypa1|24968  
 AT1G19430  
 AT1G67690 Phypa1|6848,Phypa1|37454  
 AT3G25150,AT5G60980,AT3G07250,AT5G48650,AT1G13730,AT2G03640,AT3G55540,AT1G69250,AT5G43960

Phypa1|31666,Phypa1|31665,Phypa1|38301,Phypa1|4005,Phypa1|4008  
AT1G09790,AT3G10116,AT5G60920,AT3G02210,AT3G29810,AT5G60950,AT5G15630  
Phypa1|17680,Phypa1|38836,Phypa1|26105  
AT1G01460 Phypa1|1613  
AT1G77740,AT1G21980,AT2G26420,AT3G56960,AT2G41210,AT3G07960  
Phypa1|7933  
AT3G09920 Phypa1|1760,Phypa1|1358  
Phypa1|11029  
Phypa1|4289  
Phypa1|26872  
AT1G10900,AT1G60890  
AT4G01190Phypa1|1616  
AT2G25530 Phypa1|35725,Phypa1|38777  
AT1G63610 Phypa1|25620,Phypa1|37597  
AT3G04560 Phypa1|34386  
Phypa1|6558  
AT2G16360 Phypa1|36172,Phypa1|2604,Phypa1|25460,Phypa1|26500,Phypa1|26493  
AT2G21580,AT4G39200,AT4G34555  
Phypa1|39600  
Phypa1|31177,Phypa1|30956  
Phypa1|31332,Phypa1|30440,Phypa1|23010,Phypa1|30840  
Phypa1|31139  
AT1G67940 Phypa1|27662  
AT5G39040 Phypa1|3125  
AT5G14100 Phypa1|29760  
Phypa1|31074  
AT5G58270,AT4G28630,AT4G28620 Phypa1|16595,Phypa1|24034  
Phypa1|31098,Phypa1|21480  
Phypa1|31354,Phypa1|30602,Phypa1|31353,Phypa1|30582  
Phypa1|31458,Phypa1|31323,Phypa1|30826  
AT3G28860 Phypa1|24311,Phypa1|2581,Phypa1|28630  
Phypa1|30974,Phypa1|31084  
Phypa1|30683  
Phypa1|30825  
AT1G70610 Phypa1|39554,Phypa1|39527  
Phypa1|30975  
Phypa1|31112  
Phypa1|25919,Phypa1|35023,Phypa1|10877  
Phypa1|31443  
Phypa1|30460  
Phypa1|9875  
Phypa1|31150  
Phypa1|31247  
AT4G01820,AT4G01830,AT1G02530,AT1G02520,AT2G47000,AT3G62150,AT4G18050,AT5G46540  
Phypa1|2911,Phypa1|39676  
Phypa1|31036  
AT3G28360,AT3G28390,AT3G28380,AT3G28415,AT3G28345 Phypa1|37984  
AT3G55320,AT2G39480 Phypa1|25556,Phypa1|6535  
Phypa1|26878,Phypa1|35991  
Phypa1|30679  
Phypa1|31174  
Phypa1|31486,Phypa1|30669,Phypa1|30879,Phypa1|30821,Phypa1|30428,Phypa1|31471,Phypa1|21628  
Phypa1|21476  
Phypa1|22945  
AT2G36910  
Phypa1|31218  
Phypa1|30948  
Phypa1|22529,Phypa1|31158,Phypa1|30429,Phypa1|30036,Phypa1|30019  
Phypa1|31391  
Phypa1|23606  
AT4G33460  
Phypa1|287,Phypa1|31326,Phypa1|30816,Phypa1|30475,Phypa1|30734,Phypa1|31021,Phypa1|30752,Phypa1|30597  
Phypa1|31222  
AT1G28010,AT1G27940,AT4G25960,AT1G10680  
AT4G25450 Phypa1|37541  
Phypa1|30926  
Phypa1|31194  
Phypa1|2250  
Phypa1|665  
Phypa1|23916,Phypa1|38079  
Phypa1|306  
Phypa1|30421,Phypa1|30949,Phypa1|30427  
Phypa1|30976  
AT5G03910 Phypa1|25025  
Phypa1|31103  
Phypa1|22575,Phypa1|12921  
Phypa1|31023  
Phypa1|30590,Phypa1|30672  
AT1G65410 Phypa1|36457,Phypa1|25192  
AT1G63270 Phypa1|25101  
Phypa1|30487

AT5G64910,AT5G10010 Phypa1|27547,Phypa1|28943  
AT5G59770 Phypa1|39179  
AT5G10480 Phypa1|38414  
AT3G57290 Phypa1|38028,Phypa1|23692,Phypa1|38752  
AT3G04380 Phypa1|87  
Phypa1|14709  
AT5G43990,AT1G04050  
Phypa1|25416  
AT5G42470 Phypa1|37528  
AT1G13750,AT5G50400,AT4G24890 Phypa1|24343,Phypa1|25809  
Phypa1|29774  
AT1G13760  
AT1G13900,AT2G03450 Phypa1|27563,Phypa1|25288,Phypa1|36553  
Phypa1|22563  
AT1G66050,AT1G66040,AT5G39550,AT1G57800,AT1G57820,AT4G08590 Phypa1|30367,Phypa1|26186  
Phypa1|32340  
Phypa1|393,Phypa1|30762  
AT1G76050 Phypa1|25500  
AT4G12790 Phypa1|37712  
AT5G60040  
Phypa1|36234  
AT4G35800 Phypa1|17772,Phypa1|21431  
Phypa1|31243  
AT3G57660 Phypa1|35473  
AT1G73030,AT1G17730 Phypa1|26699,Phypa1|38525,Phypa1|39694,Phypa1|35992  
AT2G26470 Phypa1|33853  
AT3G22300 Phypa1|24313  
AT3G12650 Phypa1|27110  
AT2G40980 Phypa1|2860,Phypa1|1774  
AT1G08370 Phypa1|34580,Phypa1|36569,Phypa1|39547,Phypa1|36070  
Phypa1|33710  
AT4G16070,AT3G14075 Phypa1|37438,Phypa1|27978  
AT2G38280 Phypa1|28562,Phypa1|38788,Phypa1|29881  
AT1G76250 Phypa1|1015,Phypa1|29672,Phypa1|29416,Phypa1|28997,Phypa1|36230  
AT3G08800 Phypa1|32249  
AT3G51100Phypa1|14886,Phypa1|24152  
AT5G62300,AT3G45030,AT3G47370 Phypa1|29611,Phypa1|30566,Phypa1|29490  
AT4G17740 Phypa1|28896  
AT3G57680 Phypa1|28379  
Phypa1|31172,Phypa1|6427  
AT1G54500 Phypa1|32302,Phypa1|33074  
AT1G48850 Phypa1|36253  
AT5G01310 Phypa1|27036  
AT1G02010,AT1G12360,AT4G12120 Phypa1|14009,Phypa1|38131  
AT1G67990,AT1G67980,AT1G24735  
Phypa1|30996  
AT4G34050 Phypa1|25127  
AT3G62000,AT3G61990 Phypa1|28922  
AT4G26220  
AT1G75980 Phypa1|685  
AT2G03800 Phypa1|18755,Phypa1|36788  
AT1G63980 Phypa1|32098,Phypa1|35806  
Phypa1|30978,Phypa1|30847  
AT5G06580 Phypa1|38552,Phypa1|36139  
Phypa1|30674  
AT5G16260 Phypa1|2256  
AT5G11040Phypa1|37687,Phypa1|28652  
AT5G57040 Phypa1|28890,Phypa1|29223  
AT1G27520,AT5G43710 Phypa1|35360  
AT5G18950  
Phypa1|29687  
AT1G12670  
AT1G76280,AT2G17033 Phypa1|35775  
AT1G02060,AT2G37230 Phypa1|39172  
AT2G01390 Phypa1|26857,Phypa1|30827  
AT5G46580,AT4G16390 Phypa1|37667,Phypa1|37780  
AT5G27270 Phypa1|36986  
Phypa1|36597  
AT1G01970 Phypa1|126  
AT3G29290  
AT1G18900,AT1G74750 Phypa1|27201  
AT4G21170,AT3G56030,AT2G40240,AT1G06270,AT2G27800,AT4G34820,AT3G25210,AT1G19520,AT1G13800,AT2  
G26790,AT1G11900,AT5G61370,AT5G60960,AT3G49240,AT1G10270,AT4G38150,AT2G18520,AT4G36680,AT1G80  
150,AT1G61870,AT1G11630,AT3G13160,AT1G55890,AT3G13150,AT2G17670,AT5G14080,AT2G38420  
AT2G19280  
AT1G51965 Phypa1|38791  
AT5G50280 Phypa1|28  
Phypa1|38029  
AT3G23020,AT1G73710  
AT1G09900,AT3G04760,AT1G79080,AT1G08610,AT3G53700,AT1G74580,AT3G09060,AT2G17140,AT1G12300,AT1  
G12620,AT1G12775,AT3G22470,AT1G12700,AT1G63630,AT1G63230,AT1G62860,AT1G64100,AT1G63400,AT1G62  
910,AT1G63150,AT1G62590,AT1G63330,AT1G62930,AT1G63130,AT1G62670,AT1G63070,AT1G63080,AT1G62720,



AT1G62680,AT5G16640,AT1G06580,AT1G64580,AT3G16710,AT5G41170,AT4G26800,AT2G16880,AT4G28010,AT1  
 G05670,AT5G01110,AT2G15630,AT1G09820,AT5G39710,AT1G77340,AT5G65560,AT3G07290,AT4G11690,AT5G28  
 460,AT3G61520,AT5G28370,AT1G53330,AT5G18475,AT1G07740,AT5G16420,AT1G02420,AT3G61360,AT5G46100,  
 AT3G60050,AT1G55630,AT1G71060,AT1G77360,AT1G52640,AT1G80550,AT3G15200,AT5G15010,AT1G80880,AT3  
 G22670,AT3G04130,AT5G11310,AT5G65820,AT5G43820,AT3G62540,AT5G14820,AT3G62470,AT1G26500,AT1G20  
 300,AT1G74900,AT1G73400,AT4G20090,AT5G64320,AT1G05600,AT2G36240,AT1G09680,AT4G26680,AT5G40400,  
 AT1G66345,AT2G15980,AT1G11710,AT5G38730,AT1G03560,AT5G47360  
 AT4G30825 Phypa1|38745,Phypa1|39058  
 AT5G42310 Phypa1|38434  
 Phypa1|1810  
 Phypa1|518  
 AT1G74850 Phypa1|36028  
 Phypa1|9676,Phypa1|33308  
 AT1G31840  
 Phypa1|1625  
 Phypa1|29117  
 AT3G14580 Phypa1|1634  
 AT3G17370  
 AT5G18390,AT5G06400  
 Phypa1|37610  
 AT5G62370,AT3G18020,AT1G71210,AT1G79540  
 AT1G63320  
 AT3G46610 Phypa1|4011  
 AT2G30780,AT2G48000 Phypa1|28273,Phypa1|24709  
 AT4G01570  
 AT2G31400 Phypa1|37115,Phypa1|37912  
 AT5G21222,AT5G25630 Phypa1|53  
 AT1G19525 Phypa1|8688  
 AT3G53170,AT5G48730,AT3G06430 Phypa1|28744,Phypa1|26106  
 AT2G06000 Phypa1|1128  
 AT3G09650 Phypa1|27971  
 AT5G59900,AT1G13630,AT5G61990  
 AT2G01360 Phypa1|8324  
 AT2G28050  
 AT1G06710,AT2G01740,AT2G39230,AT3G54980,AT5G61400,AT1G22960  
 AT2G35130 Phypa1|36103,Phypa1|36549  
 AT1G77405  
 AT3G59040 Phypa1|24669  
 Phypa1|25655,Phypa1|29794,Phypa1|3615,Phypa1|36817,Phypa1|39268  
 Phypa1|25476  
 AT5G04810 Phypa1|462,Phypa1|37311  
 Phypa1|27742  
 AT4G20740  
 AT5G39980 Phypa1|31514  
 AT2G18940 Phypa1|32599,Phypa1|26346,Phypa1|34058  
 AT1G10910 Phypa1|31985  
 AT3G16010 Phypa1|39327,Phypa1|32573  
 AT4G34830 Phypa1|34991,Phypa1|8513  
 AT1G79490  
 Phypa1|30299,Phypa1|35095  
 Phypa1|37994  
 AT3G42560  
 Phypa1|31819  
 AT2G41720 Phypa1|37745  
 AT4G14190  
 AT4G31850 Phypa1|29130  
 AT5G46680  
 Phypa1|30333  
 Phypa1|36202  
 AT5G02860 Phypa1|24226  
 AT1G13040,AT5G12100,AT5G55840,AT1G19290,AT4G19440,AT5G14770,AT3G48810,AT1G30290,AT1G52620  
 AT3G18110 Phypa1|33554  
 AT2G17525,AT5G15280  
 AT2G32630,AT5G24830  
 Phypa1|3445  
 AT3G06920  
 AT3G16890  
 AT5G13770  
 AT4G39620 Phypa1|37527,Phypa1|7071  
 AT3G27050 Phypa1|25270,Phypa1|735  
 AT1G09140,AT4G02430,AT1G02840,AT3G49430 Phypa1|24716,Phypa1|38399,Phypa1|28631  
 AT5G20070 Phypa1|24294  
 AT5G52030 Phypa1|3895,Phypa1|27982  
 AT5G61500 Phypa1|36668  
 AT1G69680 Phypa1|37043,Phypa1|29843  
 AT4G36190,AT4G36195,AT2G18080 Phypa1|39761  
 AT2G27280,AT2G27285,AT1G55928 Phypa1|33874  
 AT1G03810,AT4G28440,AT2G33845,AT1G10590,AT1G23750 Phypa1|34311,Phypa1|24239  
 AT3G54670 Phypa1|27310  
 AT2G31440 Phypa1|26290,Phypa1|37179  
 AT5G51760,AT3G11410,AT2G29380,AT1G07430,AT5G59220,AT3G63320,AT1G17550,AT1G72770,AT1G17545,AT4  
 G11040,AT5G57050,AT4G26080 Phypa1|1416,Phypa1|488

AT3G24180,AT4G10060,AT1G33700,AT5G49900 Phypa1|25985,Phypa1|37233  
AT5G64830 Phypa1|28882  
AT3G47890,AT3G47900 Phypa1|398,Phypa1|27954  
AT3G47910 Phypa1|27956  
AT5G15770 Phypa1|38462  
AT3G53010,AT4G34215 Phypa1|36200  
AT1G74290,AT1G74280,AT1G74300,AT2G36290,AT3G48410,AT3G54240  
AT3G44510,AT3G44520,AT1G08310 Phypa1|321,Phypa1|28377  
Phypa1|20762,Phypa1|20761  
AT5G22460,AT3G03230,AT3G03240  
AT1G62780 Phypa1|2463  
AT5G60710,AT3G54780,AT2G38970,AT1G08050,AT4G37890,AT2G22680,AT5G65683,AT5G49665  
Phypa1|22699  
AT1G14650,AT1G14640,AT5G06890,AT5G12280,AT3G49130,AT5G06520,AT2G43960,AT3G27600,AT4G16200  
Phypa1|28388,Phypa1|35949  
AT2G25310,AT4G32130 Phypa1|37432  
AT1G12800 Phypa1|26669,Phypa1|33981  
AT1G23290,AT1G70600,AT1G12960  
Phypa1|24566,Phypa1|24159,Phypa1|39174,Phypa1|36823,Phypa1|2525,Phypa1|35677,Phypa1|38192  
AT1G78895,AT1G16830 Phypa1|2195,Phypa1|25141  
AT2G30200 Phypa1|30584,Phypa1|31144  
Phypa1|7576  
AT5G48240 Phypa1|35016  
AT2G32900 Phypa1|3374  
AT5G15070,AT3G01310 Phypa1|36760,Phypa1|37083  
AT1G23280 Phypa1|2578,Phypa1|4125  
AT1G06060 Phypa1|28973,Phypa1|38358  
AT4G17910 Phypa1|38911  
AT5G37360 Phypa1|31978  
AT1G60640 Phypa1|10522  
AT5G13650  
AT2G31060 Phypa1|39076  
Phypa1|23605,Phypa1|30945  
Phypa1|27991,Phypa1|3874  
AT5G52370,AT5G58990 Phypa1|32152  
AT5G52100 Phypa1|30832  
AT3G05760 Phypa1|8907,Phypa1|37586  
AT2G23460,AT4G34390,AT1G31930 Phypa1|37331  
Phypa1|10793  
AT2G26990 Phypa1|27572,Phypa1|33572,Phypa1|33922  
AT2G14850,AT4G33890,AT5G67410,AT2G24530,AT4G31440 Phypa1|9672,Phypa1|1976  
Phypa1|20516,Phypa1|22232  
AT3G21070 Phypa1|2660,Phypa1|26944  
Phypa1|2591  
AT1G75660,AT1G54490,AT5G42540 Phypa1|38147  
AT4G29410,AT2G19730 Phypa1|2184,Phypa1|39767,Phypa1|2183,Phypa1|2363,Phypa1|31447  
AT5G44730 Phypa1|24696,Phypa1|26662,Phypa1|30831  
AT3G63330 Phypa1|27050  
AT4G03156,AT4G08190  
AT4G39890  
AT5G64990  
AT5G47960,AT3G12160,AT5G65270,AT4G39990 Phypa1|23791,Phypa1|34571,Phypa1|23698  
AT1G05810,AT2G31680,AT2G43130,AT3G07410,AT5G47520  
Phypa1|1147,Phypa1|37832,Phypa1|34200,Phypa1|37998  
AT4G09720,AT1G22740,AT2G21880  
AT1G43890,AT3G09910,AT5G03530  
Phypa1|32062,Phypa1|36536,Phypa1|35456,Phypa1|8689,Phypa1|2543,Phypa1|26828  
AT5G46025  
AT3G46060,AT5G59840,AT3G53610  
Phypa1|38981,Phypa1|39370,Phypa1|36913,Phypa1|38820,Phypa1|38819  
Phypa1|24502  
AT1G09630,AT1G07410,AT3G46830,AT5G59150  
Phypa1|29006,Phypa1|39342,Phypa1|36883,Phypa1|36181,Phypa1|36227,Phypa1|37379  
Phypa1|29739,Phypa1|26558,Phypa1|26570,Phypa1|33516,Phypa1|26914  
Phypa1|24465  
AT3G54840 Phypa1|27407,Phypa1|2485,Phypa1|36395  
AT5G03520,AT3G09900  
Phypa1|34625,Phypa1|32252  
AT1G01200  
AT5G45130,AT4G19640 Phypa1|37121,Phypa1|37785  
AT4G07524  
AT3G11730  
AT1G73640,AT1G18200  
AT5G60860,AT2G33870,AT1G28550,AT3G15060,AT4G18430,AT4G18800,AT5G45750,AT1G16920,AT1G06400  
AT3G18820,AT1G49300,AT3G16100,AT1G52280  
Phypa1|23913,Phypa1|38671,Phypa1|24252,Phypa1|9293,Phypa1|2616  
AT4G17160  
AT4G35860,AT4G17170 Phypa1|38686,Phypa1|39618,Phypa1|37643,Phypa1|37550,Phypa1|233  
AT5G39620  
AT2G44610,AT5G10260,AT2G22290  
Phypa1|30786,Phypa1|19880,Phypa1|38514,Phypa1|2491,Phypa1|31793,Phypa1|30242  
Phypa1|18737

AT1G02130,AT4G17530,AT5G47200 Phypa1|36963,Phypa1|36946  
AT3G04460 Phypa1|23742  
AT4G29120,AT1G71180,AT1G71170 Phypa1|26536  
AT4G31290,AT5G26220 Phypa1|26204,Phypa1|37951,Phypa1|1137,Phypa1|26441  
Phypa1|20102  
AT1G44790  
AT2G39170 Phypa1|35319  
AT2G04630,AT5G51940 Phypa1|28870  
Phypa1|13656  
Phypa1|32352  
AT3G48050,AT3G48060  
AT5G55290,AT4G26710 Phypa1|877,Phypa1|1321  
AT4G32140 Phypa1|26451,Phypa1|24576  
AT3G28500,AT5G40040,AT2G27720,AT2G27710,AT3G44590  
Phypa1|23806,Phypa1|36085,Phypa1|39697,Phypa1|32317,Phypa1|32064  
AT1G05310,AT2G36710,AT2G36700 Phypa1|29214  
Phypa1|19329  
AT5G27870,AT3G05610,AT3G06830,AT5G49180,AT4G15980,AT4G33230,AT2G26450,AT2G47040,AT2G47030,AT3  
G62170  
AT4G02300,AT4G02320,AT3G14310,AT1G53830,AT1G02810,AT4G02330,AT2G47550,AT5G04970,AT3G10720,AT5  
G20860,AT3G49220,AT5G53370,AT2G43050,AT3G59010,AT1G23200,AT3G60730,AT2G45220,AT3G47400,AT5G51  
490,AT5G51500,AT4G00190,AT2G26440,AT4G33220,AT3G43270,AT3G05620  
Phypa1|1400,Phypa1|25451,Phypa1|6496,Phypa1|10336  
AT3G17060  
AT3G24130,AT5G18990,AT5G26810,AT2G47280,AT2G19150  
AT5G47500 Phypa1|30087,Phypa1|25774  
Phypa1|555,Phypa1|1920  
Phypa1|18551  
Phypa1|18090,Phypa1|549  
Phypa1|1892  
Phypa1|36591,Phypa1|26697,Phypa1|1056  
AT2G21610  
Phypa1|5310  
AT5G55590  
Phypa1|23087  
Phypa1|1398,Phypa1|27357,Phypa1|24042,Phypa1|28313,Phypa1|30349,Phypa1|25796,Phypa1|2749  
AT3G29090 Phypa1|37200  
AT3G10710,AT5G04960,AT1G53840,AT3G14300  
Phypa1|1038  
AT5G07430,AT5G07420,AT5G07410,AT1G69940,AT5G61680  
AT1G11580,AT1G11370,AT3G27980,AT1G11590,AT4G03930  
AT1G44980  
Phypa1|37084  
Phypa1|25799,Phypa1|532,Phypa1|27799,Phypa1|35946,Phypa1|27707  
AT5G09760,AT5G64640 Phypa1|1396,Phypa1|30369  
AT3G42160  
AT5G19730 Phypa1|27814  
Phypa1|37351  
Phypa1|30794,Phypa1|562,Phypa1|29300,Phypa1|39412,Phypa1|10672,Phypa1|29294,Phypa1|131,Phyp  
a1|1443,Phypa1|606,Phypa1|1444  
Phypa1|38562  
AT4G14310 Phypa1|33553  
AT5G57280 Phypa1|23820  
Phypa1|29039,Phypa1|30541,Phypa1|37354  
AT1G32380,AT2G35390,AT2G44530 Phypa1|13027,Phypa1|26053  
AT2G36835 Phypa1|38048  
AT2G47620 Phypa1|33870  
AT4G34430 Phypa1|35672  
AT1G21700 Phypa1|35486,Phypa1|16773,Phypa1|33040  
AT2G33610  
Phypa1|31466  
AT3G02875  
AT1G51780,AT1G51760,AT5G56650,AT5G56660,AT1G44350,AT5G54140  
Phypa1|31477,Phypa1|21582,Phypa1|30489,Phypa1|30021,Phypa1|30883,Phypa1|30041,Phypa1|31083,  
Phypa1|31148,Phypa1|31060,Phypa1|30470,Phypa1|30770,Phypa1|30951,Phypa1|21580,Phypa1|31305  
AT2G40300,AT3G56090,AT3G11050,AT5G01600  
Phypa1|13165,Phypa1|27942,Phypa1|36533,Phypa1|33081,Phypa1|117015  
AT4G29710,AT4G29700,AT4G29690,AT4G29680 Phypa1|26597,Phypa1|28139  
AT3G08950,AT4G39740 Phypa1|27766  
AT5G09350,AT5G64070 Phypa1|29537,Phypa1|37090  
Phypa1|11877  
AT2G20340,AT4G28680 Phypa1|37026,Phypa1|27528,Phypa1|37027  
AT5G58190  
AT3G13060 Phypa1|1175  
AT1G48110,AT3G17330,AT1G09810,AT1G55500,AT3G13460,AT5G61020,AT3G03950,AT1G27960  
AT1G79270 Phypa1|1176  
AT3G18410,AT1G49140 Phypa1|39073  
AT3G16230,AT3G16220 Phypa1|37056  
AT1G49400,AT3G18880 Phypa1|31264,Phypa1|1697  
AT1G51080 Phypa1|20335  
AT1G24490,AT2G28800 Phypa1|1410,Phypa1|482  
AT5G47510 Phypa1|25380,Phypa1|37004

AT1G55690,AT5G56160,AT3G24840  
     Phypa1|26201  
 AT4G34580,AT2G16380,AT4G39180,AT2G21540,AT2G18180,AT4G36490  
 AT2G21520,AT4G39170,AT1G75370,AT1G19650      Phypa1|28574,Phypa1|29883,Phypa1|27205  
 AT4G36390      Phypa1|25437  
     Phypa1|31239  
     Phypa1|31251  
 AT2G26740,AT2G26750  
 AT3G51000  
 AT4G15955,AT4G15960,AT4G02340  
     Phypa1|30038  
     Phypa1|28507  
     Phypa1|26453  
     Phypa1|36016  
     Phypa1|3786  
     Phypa1|11240  
     Phypa1|31461,Phypa1|30017  
 AT3G05600  
     Phypa1|27125  
     Phypa1|193  
 AT1G50590  
 AT3G59260,AT3G59220,AT2G43120  
 AT1G08490      Phypa1|24847,Phypa1|25118,Phypa1|19358,Phypa1|3088  
 AT3G08490  
 AT4G35170      Phypa1|16014  
 AT3G24600,AT2G41990,AT1G45688,AT5G42860      Phypa1|32880,Phypa1|27938  
 AT5G07960      Phypa1|39488  
 AT3G61070,AT2G45740,AT1G01820      Phypa1|38112,Phypa1|2505  
 AT2G34460      Phypa1|38614  
 AT4G38370      Phypa1|27535  
     Phypa1|6653,Phypa1|29917  
     Phypa1|23756  
 AT5G26160      Phypa1|31841  
 AT5G20610  
     Phypa1|102  
 AT5G06120      Phypa1|30621,Phypa1|39170  
 AT1G74730      Phypa1|2135,Phypa1|29335,Phypa1|29582  
 AT5G08050      Phypa1|26084  
     Phypa1|22724  
 AT3G02660      Phypa1|2412  
 AT1G01770      Phypa1|27277  
 AT5G11870,AT1G71190      Phypa1|26903  
 AT3G01920      Phypa1|39048  
 AT5G10620      Phypa1|30060  
     Phypa1|28822,Phypa1|34711  
     Phypa1|12958  
 AT4G18593      Phypa1|12959  
 AT2G35880,AT2G25480,AT4G32330  
     Phypa1|19475,Phypa1|737,Phypa1|27731,Phypa1|11172,Phypa1|4406,Phypa1|11173,Phypa1|259,Phypa1|7  
 36  
 AT5G43260      Phypa1|32408,Phypa1|23706,Phypa1|39523,Phypa1|24054,Phypa1|23774,Phypa1|24986  
 AT2G39830,AT4G36860,AT1G19270,AT5G66640,AT5G17890,AT5G66610,AT5G66620,AT5G66630  
     Phypa1|47,Phypa1|30508,Phypa1|25937,Phypa1|29561,Phypa1|1852,Phypa1|30304,Phypa1|37706,Phyp  
 a1|24579,Phypa1|27760  
 AT3G55520      Phypa1|1624,Phypa1|1620  
 AT4G33470      Phypa1|27145  
     Phypa1|139,Phypa1|1030  
     Phypa1|22937,Phypa1|1856,Phypa1|28300  
 AT4G33495,AT5G45790,AT1G06440,AT1G71850,AT4G24320,AT5G48040,AT3G58520,AT2G39120,AT3G63090,AT2  
 G31290,AT5G21970,AT4G08940  
 AT5G62990      Phypa1|30285  
 AT2G34050      Phypa1|2048  
 AT1G23110,AT1G70900      Phypa1|26042,Phypa1|36114  
 AT4G08360,AT4G08350,AT2G34210,AT5G04290      Phypa1|26265,Phypa1|28235  
     Phypa1|19372  
 AT2G34590,AT1G30120      Phypa1|28074,Phypa1|23896  
     Phypa1|30901,Phypa1|30020  
 AT3G13450,AT1G55510  
     Phypa1|28338  
 AT5G50850      Phypa1|39180,Phypa1|39649  
     Phypa1|31229  
 AT4G09830,AT5G64780      Phypa1|727,Phypa1|36679  
 AT4G34490      Phypa1|34235  
 AT3G12280      Phypa1|403,Phypa1|27905,Phypa1|15270  
 AT2G43940,AT2G43920,AT2G43910      Phypa1|2995  
 AT4G34880      Phypa1|30595  
 AT3G11450,AT5G06110,AT1G74250      Phypa1|37190,Phypa1|2873,Phypa1|39622  
 AT4G01900      Phypa1|36066  
 AT1G71720      Phypa1|3766,Phypa1|17905,Phypa1|32440  
 AT1G53490      Phypa1|27748  
 AT3G59990,AT2G44180      Phypa1|38290,Phypa1|36130  
 AT5G51545      Phypa1|4020

AT1G51350 Phypa1|25405,Phypa1|37521  
Phypa1|26512,Phypa1|28531  
AT1G63180,AT1G12780 Phypa1|29139,Phypa1|37014,Phypa1|34476,Phypa1|24319,Phypa1|33995  
AT3G28530,AT4G23920,AT4G10960,AT1G64440  
AT2G34850,AT1G30620,AT4G20460,AT5G44480 Phypa1|39509,Phypa1|2605  
Phypa1|31406  
AT5G27700,AT3G53890 Phypa1|38050,Phypa1|39564,Phypa1|24058,Phypa1|38757,Phypa1|2521  
AT1G62050,AT1G11740,AT1G04780,AT3G24210,AT3G04470 Phypa1|32514,Phypa1|37841  
AT2G17270 Phypa1|3990,Phypa1|24593,Phypa1|37234  
AT5G14040,AT3G48850  
Phypa1|38666,Phypa1|24162,Phypa1|3565,Phypa1|24440,Phypa1|29888,Phypa1|29269  
AT3G17910,AT1G48510 Phypa1|26035  
AT3G30841,AT4G09520 Phypa1|32762  
AT4G34120,AT4G36910 Phypa1|28279,Phypa1|38830,Phypa1|26766  
AT3G52730 Phypa1|24141  
AT5G45620,AT4G19006 Phypa1|37214,Phypa1|38698  
AT1G16290 Phypa1|25363  
AT2G23410,AT2G23400,AT5G58782,AT5G58780,AT5G58784,AT5G58770  
Phypa1|39148,Phypa1|25716,Phypa1|35975  
AT2G17570,AT5G60510,AT5G60500 Phypa1|208  
AT5G20270,AT2G24150,AT4G30850,AT2G40710,AT4G38320,AT4G37680,AT4G38290,AT4G38330  
Phypa1|37854,Phypa1|15171,Phypa1|3066,Phypa1|39445,Phypa1|36275  
AT1G09620 Phypa1|38504  
AT5G51010 Phypa1|24808  
AT4G29940 Phypa1|35104,Phypa1|8755  
AT4G26500 Phypa1|580,Phypa1|1061,Phypa1|15706  
Phypa1|1694  
AT1G55805  
AT5G38530 Phypa1|26216  
AT2G47450 Phypa1|556  
AT5G17640,AT1G10020,AT4G29310,AT1G50040,AT3G19680 Phypa1|26012,Phypa1|36076,Phypa1|39424  
AT2G46180,AT3G61570 Phypa1|1937,Phypa1|1932  
Phypa1|12007  
AT1G64150 Phypa1|152,Phypa1|25315  
AT4G13590 Phypa1|28036  
AT1G68650,AT1G25520 Phypa1|27995  
AT5G36290 Phypa1|1996,Phypa1|28750  
AT5G27660 Phypa1|28710  
AT1G72420,AT1G17350 Phypa1|36495  
AT5G21130,AT2G27080,AT5G36970,AT1G65690,AT1G54540,AT2G35980,AT1G08160  
Phypa1|35748,Phypa1|6052,Phypa1|30351  
AT2G18400 Phypa1|31276  
AT1G05190 Phypa1|38110,Phypa1|24195  
AT1G53645 Phypa1|34181  
AT1G52500 Phypa1|29144,Phypa1|37971,Phypa1|27486,Phypa1|363  
AT5G43930,AT1G04140 Phypa1|26469,Phypa1|28324  
AT3G10640,AT5G04850 Phypa1|2436,Phypa1|32955,Phypa1|8730,Phypa1|16112,Phypa1|16110  
AT3G05975,AT3G54200  
Phypa1|28800,Phypa1|6450,Phypa1|31687,Phypa1|26251,Phypa1|29048,Phypa1|20726  
AT3G26570 Phypa1|35056,Phypa1|17991,Phypa1|29133  
AT2G20720,AT4G02820,AT1G02150,AT2G20710,AT4G21705,AT5G09450,AT3G11350,AT3G11380,AT1G28020,AT1  
G28000,AT1G43010,AT1G60770,AT4G01990,AT1G02370,AT5G27460 Phypa1|38306,Phypa1|1392  
AT3G29390 Phypa1|983  
Phypa1|9519  
Phypa1|25236  
AT3G23640 Phypa1|39120,Phypa1|24583,Phypa1|26549,Phypa1|7643,Phypa1|29351  
Phypa1|5523  
AT5G63840 Phypa1|37077  
AT3G45940,AT1G68560  
Phypa1|38365,Phypa1|38247,Phypa1|36897,Phypa1|27827,Phypa1|24045,Phypa1|2531,Phypa1|18554,Phypa1|37759,Phypa1|26073,Phypa1|29553,Phypa1|10619,Phypa1|38178,Phypa1|28405  
AT5G11720  
AT1G80070,AT4G38780 Phypa1|38918,Phypa1|38119  
AT2G02570 Phypa1|33082,Phypa1|27007,Phypa1|26307  
AT5G06420,AT1G01350,AT5G39640,AT4G01023 Phypa1|37096  
AT1G77090 Phypa1|6578,Phypa1|36626  
AT5G12470 Phypa1|27834,Phypa1|38846  
AT3G21200 Phypa1|30124,Phypa1|28987  
AT5G04990,AT3G10730 Phypa1|36300,Phypa1|28983  
AT3G07565,AT1G60670,AT1G10820,AT1G68160 Phypa1|27359,Phypa1|30510,Phypa1|35353  
AT1G09800 Phypa1|27167  
AT1G73180 Phypa1|39286  
AT1G27090,AT3G24690 Phypa1|38595,Phypa1|14013  
AT5G08400,AT4G29400 Phypa1|26333,Phypa1|25098  
AT3G10230 Phypa1|28464,Phypa1|26424  
AT5G57030 Phypa1|24861,Phypa1|28362  
AT5G48470 Phypa1|35029  
AT3G17300 Phypa1|4037  
AT1G54410 Phypa1|39350  
AT3G11240,AT5G05700 Phypa1|37968  
AT3G62140 Phypa1|33366  
AT1G50430 Phypa1|3892,Phypa1|23716

AT5G64420 Phypa1|10139,Phypa1|3950  
AT3G61710 Phypa1|39463,Phypa1|26303  
AT3G02860 Phypa1|33006  
AT5G52290 Phypa1|14659  
AT2G37330 Phypa1|24792  
Phypa1|33654,Phypa1|3138,Phypa1|8692,Phypa1|22808,Phypa1|36566,Phypa1|25020,Phypa1|34085,Phypa1|29763  
AT5G35920  
AT4G36220,AT5G04330  
Phypa1|28270  
AT4G37330,AT4G37320,AT4G37360,AT4G37340,AT1G66540,AT4G37370,AT2G23190,AT2G23220,AT3G28740,AT5G36220,AT5G57220,AT4G37430,AT4G37410,AT4G37400,AT4G37310,AT5G67310,AT5G10600,AT5G10610,AT4G31970,AT4G31950,AT4G31940,AT3G25180,AT2G25160  
Phypa1|29959,Phypa1|14667  
Phypa1|33373  
AT3G53130 Phypa1|37914  
AT3G61035,AT1G58265  
Phypa1|1689  
Phypa1|23899  
AT5G07990  
AT5G25120,AT5G25130,AT5G25140,AT5G25180,AT3G26310,AT3G26300,AT3G26290,AT3G26320,AT3G26330,AT2G02580,AT5G57260,AT2G24180,AT1G13100,AT1G13090,AT1G13110,AT3G26830,AT3G26210,AT3G26190,AT3G26200,AT3G53280,AT3G44250,AT5G35715,AT3G53300,AT3G53305,AT3G53290,AT3G26170,AT3G26180,AT3G26150,AT3G26160,AT1G13080,AT3G26270,AT3G26280,AT3G26230,AT3G26220,AT4G13770,AT4G31500,AT3G48300,AT3G48270,AT3G48320,AT3G48310,AT3G48290,AT3G48280,AT2G30770,AT2G30750,AT1G11610,AT5G24950,AT5G24960,AT4G13290,AT4G13310,AT5G42590,AT4G20240  
Phypa1|27519,Phypa1|24290,Phypa1|2630,Phypa1|38881,Phypa1|38719,Phypa1|28498,Phypa1|2258,Phypa1|3794,Phypa1|1405  
Phypa1|31581  
AT1G74540,AT1G74550  
Phypa1|34410  
AT2G30490 Phypa1|29824,Phypa1|28561,Phypa1|8858  
AT2G45550,AT2G45570,AT2G45560,AT1G33730,AT1G33720,AT2G45580,AT3G61040,AT3G52970,AT4G12320,AT4G12310,AT4G12300,AT4G12330,AT5G44620,AT4G22690,AT4G22710,AT5G06900,AT2G42250,AT5G06905,AT1G50560,AT1G50520,AT3G32047,AT2G14100,AT3G20960,AT2G05180,AT4G15360,AT3G20130,AT3G20950,AT3G20940,AT4G15350,AT5G47990,AT2G27010,AT2G27000,AT3G20100,AT3G20110,AT3G20140,AT3G20080,AT4G15380,AT5G42580,AT4G15330,AT1G28430,AT3G20090,AT3G20120  
AT4G15110Phypa1|39005  
AT1G13710,AT1G74110  
AT5G09970 Phypa1|23929,Phypa1|38145  
AT2G40890 Phypa1|20149  
AT1G01280 Phypa1|39309,Phypa1|38338,Phypa1|3617  
AT1G31800 Phypa1|24249  
AT4G20235  
Phypa1|4442  
Phypa1|1207  
AT1G64950,AT2G12190,AT1G64940,AT1G64930,AT1G64900,AT5G61320,AT3G03470,AT1G11600,AT3G10570,AT5G04660,AT5G04630,AT3G10560 Phypa1|1411,Phypa1|25707  
Phypa1|29615,Phypa1|35491,Phypa1|37243,Phypa1|981,Phypa1|28371,Phypa1|1413,Phypa1|9092,Phypa1|38133,Phypa1|39225,Phypa1|21885,Phypa1|24429,Phypa1|1408,Phypa1|70,Phypa1|25946,Phypa1|30295,Phypa1|29532  
Phypa1|3935,Phypa1|14929  
AT2G22330,AT4G39950,AT5G35917,AT5G05260,AT1G16400,AT1G16410,AT1G58260,AT1G79370  
AT3G61880,AT2G46660,AT1G01190  
AT5G25900 Phypa1|30142  
AT2G26170  
AT5G19200,AT3G06060 Phypa1|27864  
AT3G05570,AT4G39235,AT2G21640 Phypa1|872  
AT1G09290 Phypa1|11460  
AT2G38250,AT5G01380 Phypa1|29832,Phypa1|29834,Phypa1|2771,Phypa1|27472,Phypa1|37862  
AT4G17510 Phypa1|28165  
AT5G41650,AT1G64185 Phypa1|35501  
AT2G39300,AT3G55060 Phypa1|2218  
Phypa1|30162  
AT3G62550  
AT3G11930,AT3G58450 Phypa1|31473  
AT1G09740,AT1G68300,AT3G25930  
AT1G26760 Phypa1|1428  
Phypa1|13037  
AT2G07714,AT1G66170,AT2G01810,AT1G33420,AT5G22260 Phypa1|29949,Phypa1|29613  
AT5G53750,AT4G27460 Phypa1|34649,Phypa1|33742  
AT2G36500,AT3G52950,AT5G50530,AT5G50640,AT5G63490  
Phypa1|27830,Phypa1|36893,Phypa1|27203,Phypa1|27171,Phypa1|24867  
AT1G64660 Phypa1|6011,Phypa1|38500,Phypa1|38167  
Phypa1|4224  
AT5G19500 Phypa1|37273  
AT1G32500 Phypa1|89  
Phypa1|15819  
AT5G12920 Phypa1|35185  
AT1G28540 Phypa1|28862  
AT1G57720,AT1G09640 Phypa1|38453,Phypa1|37224,Phypa1|37453  
Phypa1|22447,Phypa1|22331

Phypa1|21869  
 AT1G08065,AT5G56330,AT1G08080,AT2G28210,AT4G20990,AT4G21000,AT5G04180,AT3G52720  
 Phypa1|201  
 Phypa1|34467  
 Phypa1|18726  
 AT5G53850 Phypa1|29399,Phypa1|24362  
 AT4G17730,AT5G46860,AT1G32270,AT5G16830 Phypa1|25929,Phypa1|36812,Phypa1|23811  
 AT2G21430,AT4G39090,AT4G16190  
 AT3G45310,AT5G60360 Phypa1|28910  
 AT3G54940 Phypa1|37936,Phypa1|38606  
 AT5G43060,AT1G47128,AT4G36880,AT4G11320,AT4G11310,AT4G23520,AT3G19400,AT3G19390,AT3G43960,AT1  
 G20850,AT4G35350,AT1G09850  
 Phypa1|34318  
 AT2G22160 Phypa1|2480,Phypa1|38316,Phypa1|39541,Phypa1|39520,Phypa1|38589  
 AT2G34080,AT1G29090,AT1G29110,AT1G29080,AT3G49340,AT2G27420,AT2G27395  
 AT1G06260,AT5G50260,AT3G48340,AT3G48350,AT5G45890  
 AT4G17615,AT5G47100 Phypa1|26652,Phypa1|32240  
 AT5G55990,AT4G26570,AT4G16350,AT4G26560 Phypa1|38951,Phypa1|31582  
 AT1G64480,AT5G24270,AT4G01420,AT4G33000 Phypa1|31025,Phypa1|38683,Phypa1|28649  
 AT2G43490,AT3G59570 Phypa1|30214  
 AT1G54770,AT5G30495 Phypa1|725  
 AT4G16690,AT5G58310,AT3G10870 Phypa1|38732,Phypa1|38687,Phypa1|37879,Phypa1|25125  
 AT1G69240,AT1G26360,AT3G29770  
 Phypa1|28686,Phypa1|28384,Phypa1|4282,Phypa1|37087,Phypa1|32487  
 AT4G09900,AT1G33990  
 Phypa1|29998,Phypa1|38082  
 Phypa1|28510,Phypa1|29574,Phypa1|26420  
 AT4G21190,AT1G04590 Phypa1|2049  
 AT5G44160,AT1G03840  
 AT1G55110,AT3G13810 Phypa1|34279,Phypa1|33937,Phypa1|33159,Phypa1|534  
 AT5G66730,AT3G50700  
 Phypa1|10512  
 AT5G22890  
 AT5G60470,AT3G45260,AT5G03150,AT1G14580,AT2G02080,AT2G02070,AT4G02670  
 AT2G01940,AT1G25250,AT1G68130 Phypa1|39368  
 AT1G45110Phypa1|24813  
 AT5G26880 Phypa1|24841,Phypa1|26583  
 AT4G38800,AT4G34840 Phypa1|2886,Phypa1|17935,Phypa1|39461  
 AT4G33410 Phypa1|9208,Phypa1|34223  
 AT5G27990,AT3G22510 Phypa1|753  
 Phypa1|19707,Phypa1|22045,Phypa1|20056,Phypa1|35494  
 AT1G03445  
 AT1G08420,AT2G27210 Phypa1|37127,Phypa1|38743,Phypa1|29784,Phypa1|32697,Phypa1|7754  
 AT4G03080  
 AT2G35680  
 Phypa1|5336  
 Phypa1|25206  
 AT5G56610  
 AT2G48070 Phypa1|30959  
 AT3G21110Phypa1|24822  
 AT2G34680 Phypa1|25815,Phypa1|29671  
 AT5G49820 Phypa1|38612,Phypa1|38747  
 AT5G01510  
 Phypa1|36708  
 AT2G23470 Phypa1|32543  
 AT1G49170 Phypa1|37061  
 AT1G59760 Phypa1|36737  
 AT2G06990 Phypa1|36612  
 AT3G46960 Phypa1|39693  
 Phypa1|833  
 Phypa1|30586  
 AT1G31160  
 AT3G56490 Phypa1|2818  
 AT2G27460 Phypa1|16941,Phypa1|37668,Phypa1|6434  
 AT3G17740 Phypa1|33569  
 AT1G27480 Phypa1|38415  
 AT1G10300,AT1G50920,AT3G23860 Phypa1|36510,Phypa1|36000  
 AT1G77690,AT2G21050,AT2G38120,AT5G01240  
 Phypa1|5563,Phypa1|27468,Phypa1|15020,Phypa1|36599,Phypa1|26890,Phypa1|2929,Phypa1|29684,Ph  
 ypa1|36927,Phypa1|29026  
 Phypa1|1507  
 AT3G62800 Phypa1|1504  
 Phypa1|39228  
 AT5G41070,AT3G26932  
 AT2G28380 Phypa1|1506  
 AT1G02000,AT4G00110,AT2G45310,AT4G12250  
 AT4G30440  
 Phypa1|24009,Phypa1|2627,Phypa1|2530,Phypa1|2499,Phypa1|36390,Phypa1|2988,Phypa1|23885,Phyp  
 a1|32904,Phypa1|33807  
 AT3G23820 Phypa1|1449,Phypa1|30606  
 AT2G42770 Phypa1|27348  
 Phypa1|31040

AT1G14310 Phypa1|26741  
AT2G41250 Phypa1|34916,Phypa1|20578  
AT2G04340 Phypa1|39590  
AT4G02530 Phypa1|33326  
AT3G11330,AT5G05850,AT3G26500,AT1G12970 Phypa1|1882  
AT5G45510  
Phypa1|34712  
AT2G17440,AT4G35470 Phypa1|26486,Phypa1|35705  
Phypa1|1029,Phypa1|27559,Phypa1|35960,Phypa1|38150  
Phypa1|29645  
Phypa1|506,Phypa1|25402  
Phypa1|25033  
Phypa1|1014  
AT1G69545  
Phypa1|894,Phypa1|31226,Phypa1|4,Phypa1|31,Phypa1|31208,Phypa1|123,Phypa1|27351,Phypa1|27388,Phypa1|37857  
AT2G19330,AT4G29880,AT4G26050  
Phypa1|26293,Phypa1|336,Phypa1|25983,Phypa1|26068,Phypa1|26995,Phypa1|1069,Phypa1|26079,Phypa1|30267,Phypa1|26708,Phypa1|25126,Phypa1|24730,Phypa1|29196,Phypa1|892,Phypa1|29342,Phypa1|34246,Phypa1|16476  
Phypa1|30316,Phypa1|26656,Phypa1|27617,Phypa1|31248,Phypa1|27618,Phypa1|432,Phypa1|430,Phypa1|31249,Phypa1|27622,Phypa1|27615,Phypa1|28555,Phypa1|30967,Phypa1|30966,Phypa1|30969,Phypa1|37059,Phypa1|28428,Phypa1|28422,Phypa1|1066,Phypa1|31214,Phypa1|31262,Phypa1|31263,Phypa1|27603,Phypa1|28541,Phypa1|35953,Phypa1|25806,Phypa1|35,Phypa1|29277,Phypa1|435,Phypa1|30384,Phypa1|28664,Phypa1|1053,Phypa1|28937,Phypa1|30326,Phypa1|28669,Phypa1|24397,Phypa1|24450,Phypa1|24443,Phypa1|931,Phypa1|3462,Phypa1|29065,Phypa1|25168,Phypa1|26885,Phypa1|26720,Phypa1|25175,Phypa1|25167,Phypa1|30567,Phypa1|30511,Phypa1|25496,Phypa1|29680,Phypa1|1071,Phypa1|38066,Phypa1|27155,Phypa1|26108,Phypa1|25379,Phypa1|30314,Phypa1|30619,Phypa1|25874,Phypa1|17026,Phypa1|27216,Phypa1|24863,Phypa1|28676,Phypa1|27619,Phypa1|28237,Phypa1|25795,Phypa1|1058,Phypa1|37484,Phypa1|27,Phypa1|36279,Phypa1|38982,Phypa1|28701,Phypa1|26977,Phypa1|25633,Phypa1|29407,Phypa1|27710,Phypa1|1418,Phypa1|25594,Phypa1|1351,Phypa1|26111,Phypa1|26099,Phypa1|29298,Phypa1|28770,Phypa1|30259,Phypa1|1055,Phypa1|28056,Phypa1|26806,Phypa1|27157,Phypa1|29311,Phypa1|26025,Phypa1|1510,Phypa1|26737,Phypa1|1017,Phypa1|28203,Phypa1|29459,Phypa1|30719,Phypa1|1420,Phypa1|28466,Phypa1|25174,Phypa1|24853  
AT3G18165 Phypa1|35135,Phypa1|33383  
AT5G36880 Phypa1|20689,Phypa1|9296  
Phypa1|2609  
Phypa1|31469,Phypa1|31300,Phypa1|31216  
AT2G45730 Phypa1|29171  
AT2G38710 Phypa1|22840,Phypa1|32809  
AT3G01060 Phypa1|25575  
Phypa1|37381  
AT1G17145,AT1G78420 Phypa1|25673,Phypa1|35435  
AT5G14250 Phypa1|39036  
Phypa1|31237  
Phypa1|30117  
AT5G48220,AT2G04400  
AT5G58000,AT1G43600,AT1G43610,AT3G50376,AT5G54210,AT1G20320,AT3G19600,AT2G04930,AT3G17550,AT2G02290,AT5G23470,AT3G15330 Phypa1|25772  
AT3G24140,AT4G01460,AT3G61950,AT2G46810,AT3G06120,AT5G53210,AT1G72210,AT1G22490,AT5G65320,AT5G46690 Phypa1|30985,Phypa1|36769  
Phypa1|11910  
Phypa1|3110  
AT1G76570 Phypa1|24005  
Phypa1|2006  
AT5G28450  
Phypa1|5822,Phypa1|29443  
Phypa1|39455  
AT3G54890 Phypa1|28419,Phypa1|29400,Phypa1|39195  
AT5G01530,AT3G08940,AT2G40100 Phypa1|39755,Phypa1|39756,Phypa1|39175,Phypa1|39176  
AT1G29920,AT1G29910,AT1G29930,AT2G34420,AT2G34430  
Phypa1|36062,Phypa1|36148,Phypa1|24041,Phypa1|38784,Phypa1|36053,Phypa1|39236,Phypa1|15738,Phypa1|39263,Phypa1|39250,Phypa1|31491,Phypa1|35815,Phypa1|30799,Phypa1|26271,Phypa1|32895,Phypa1|2420,Phypa1|24292,Phypa1|23745,Phypa1|38609  
AT5G54270  
AT1G19150  
AT3G47470  
AT1G15820 Phypa1|2583,Phypa1|25531  
Phypa1|15090  
AT4G10340 Phypa1|31140,Phypa1|2305,Phypa1|2304,Phypa1|22191  
AT1G61520 Phypa1|2931,Phypa1|29070,Phypa1|30648,Phypa1|28878  
AT3G61470 Phypa1|30115,Phypa1|39422,Phypa1|2486,Phypa1|30110,Phypa1|36311  
AT1G45474  
AT2G05100,AT2G05070,AT3G27690  
AT5G17240 Phypa1|36643  
AT2G15820 Phypa1|24568,Phypa1|1769  
AT1G29850 Phypa1|25732  
AT1G11240Phypa1|31718  
AT2G19450 Phypa1|33224,Phypa1|37212  
AT1G72440 Phypa1|4216  
AT3G11820,AT3G52400,AT1G61290,AT1G11250,AT4G03330  
Phypa1|29829,Phypa1|35939,Phypa1|38278,Phypa1|26871,Phypa1|36991,Phypa1|33064,Phypa1|30971,Phypa1|38655



AT1G08560,AT2G18260  
AT5G08080,AT3G03800 Phypa1|21708,Phypa1|28474  
AT2G47910 Phypa1|28490  
Phypa1|4073,Phypa1|34436,Phypa1|31095,Phypa1|31085,Phypa1|30953  
AT3G48560 Phypa1|25667,Phypa1|23781  
Phypa1|1696  
Phypa1|31181,Phypa1|22610  
AT1G79610,AT1G54370 Phypa1|16494,Phypa1|6059,Phypa1|16495,Phypa1|26969,Phypa1|28412  
Phypa1|4302  
Phypa1|25462  
AT4G30450,AT4G30460  
AT4G15150,AT3G24250  
Phypa1|34603,Phypa1|7107  
Phypa1|23415  
AT3G55790  
AT3G14480  
AT4G29030,AT1G04660,AT4G29020,AT2G30560  
AT1G15840 Phypa1|9306,Phypa1|4478,Phypa1|9215  
AT1G11850  
AT5G33390  
Phypa1|15385  
AT2G17870,AT4G36020  
AT2G05510,AT2G05440,AT2G05380,AT2G05520,AT2G05530,AT2G05540  
Phypa1|7693,Phypa1|21248  
Phypa1|34427  
AT1G15830 Phypa1|22239  
AT5G58470 Phypa1|14174,Phypa1|35813  
AT1G53625 Phypa1|35251  
Phypa1|15325  
AT1G74230,AT5G61030  
AT3G44950,AT1G76965 Phypa1|6167,Phypa1|37430,Phypa1|15289  
AT2G11005,AT5G19960  
Phypa1|19437,Phypa1|23409  
Phypa1|9843  
AT1G75550  
Phypa1|16966,Phypa1|2333  
AT4G01985,AT1G04800  
Phypa1|32059,Phypa1|35459  
AT2G14160,AT4G16240  
AT1G77030  
Phypa1|34825,Phypa1|23261  
AT5G61660,AT3G15400  
Phypa1|2584  
Phypa1|35250,Phypa1|35249  
AT5G07530,AT5G07540,AT4G15460,AT1G07135,AT3G04640,AT5G25425  
AT1G02710,AT5G40490,AT1G27710  
Phypa1|23173,Phypa1|9091  
Phypa1|16566  
AT2G21660,AT4G39260 Phypa1|7744  
AT1G53640  
AT2G21060,AT4G38680 Phypa1|36426,Phypa1|36685,Phypa1|2070  
AT3G42130,AT1G62240  
Phypa1|34690  
AT5G46730  
AT5G16940 Phypa1|23668  
AT4G30600 Phypa1|11279,Phypa1|18791  
AT3G47390 Phypa1|28790,Phypa1|954,Phypa1|34391,Phypa1|35222  
AT5G04740,AT1G16880 Phypa1|27455,Phypa1|25403  
AT2G03390 Phypa1|39092  
AT1G78230 Phypa1|113,Phypa1|17318  
AT4G03260 Phypa1|11030  
AT4G22990,AT4G11810,AT1G63010  
Phypa1|36814,Phypa1|38557,Phypa1|34166,Phypa1|37471,Phypa1|37943  
AT3G07270 Phypa1|26060,Phypa1|28140  
AT5G51740 Phypa1|36863  
AT5G65690,AT4G37870  
Phypa1|28438,Phypa1|38662,Phypa1|28063,Phypa1|24346,Phypa1|22726,Phypa1|1728  
AT3G05500,AT2G47780,AT1G67360 Phypa1|39456  
AT3G50090,AT3G50100,AT5G67240,AT5G05540 Phypa1|32417  
AT5G55220 Phypa1|26554,Phypa1|36190,Phypa1|23417  
AT3G20870 Phypa1|37557  
AT1G15020,AT2G01270 Phypa1|35139,Phypa1|7355,Phypa1|37737  
AT4G08800,AT2G19470  
Phypa1|28728  
AT1G72710,AT4G26100,AT5G57015 Phypa1|30651  
AT3G23340,AT4G14340,AT4G28540,AT1G03930,AT5G44100,AT1G04440,AT5G43320  
Phypa1|28732  
AT4G28880,AT4G28860 Phypa1|14328,Phypa1|2932,Phypa1|27745  
AT5G25940 Phypa1|330  
Phypa1|849  
AT3G19420 Phypa1|28628,Phypa1|433  
AT3G50110

AT5G39400 Phypa1|5406,Phypa1|35817  
AT3G18660,AT1G77130,AT1G54940,AT1G08990,AT4G33330 Phypa1|38004,Phypa1|37675,Phypa1|36183  
AT1G27330,AT1G27350 Phypa1|24937,Phypa1|38387  
AT5G14580 Phypa1|9128,Phypa1|30160  
AT3G03710 Phypa1|35328  
AT5G49370,AT5G49380,AT3G06670,AT5G49390  
Phypa1|27699,Phypa1|28214,Phypa1|25775,Phypa1|30413,Phypa1|29867,Phypa1|26545  
AT4G25230,AT5G51450 Phypa1|24582,Phypa1|36790  
AT3G16000  
AT5G27330,AT3G05130 Phypa1|33599  
AT4G31570,AT1G24460  
AT4G32190  
AT1G06530,AT3G58840,AT5G27220  
Phypa1|19020,Phypa1|34879,Phypa1|4420,Phypa1|18456,Phypa1|6131,Phypa1|31585,Phypa1|5110  
Phypa1|4840,Phypa1|4870,Phypa1|6124,Phypa1|35788  
Phypa1|20838,Phypa1|32661  
Phypa1|20500  
AT1G05320,AT2G32240 Phypa1|35220  
AT4G27790,AT5G08580 Phypa1|3005,Phypa1|30149  
AT4G30480,AT2G25290,AT4G32070,AT5G20360,AT1G62390 Phypa1|21741  
AT3G23900 Phypa1|4197,Phypa1|31991,Phypa1|8502,Phypa1|32369  
AT5G09650 Phypa1|29113,Phypa1|27720,Phypa1|30574  
AT4G01650 Phypa1|238  
Phypa1|22795  
AT5G64050 Phypa1|28159  
Phypa1|31496  
AT2G28605 Phypa1|39356  
AT5G24350 Phypa1|35503  
AT1G51740 Phypa1|36557  
AT4G14440,AT4G14430,AT1G65520 Phypa1|29771,Phypa1|1138  
AT1G55620 Phypa1|25116  
AT4G35440 Phypa1|28064  
AT1G55090 Phypa1|26742  
AT5G41220,AT5G41210,AT5G41240 Phypa1|216,Phypa1|676,Phypa1|39400  
AT5G52570,AT4G25700 Phypa1|38308,Phypa1|1482,Phypa1|3029  
AT5G49400 Phypa1|8197,Phypa1|32499  
AT3G27120 Phypa1|38236  
AT5G08470 Phypa1|18675  
AT3G01610 Phypa1|25223  
AT1G08270,AT2G37910  
AT2G45500 Phypa1|24876  
AT1G03000 Phypa1|26726  
AT1G80350 Phypa1|34742,Phypa1|27459  
AT2G34560 Phypa1|38603  
AT2G27600 Phypa1|37579,Phypa1|36815  
AT3G56690 Phypa1|1360  
AT3G09840,AT5G03340,AT3G53230  
Phypa1|33988,Phypa1|24237,Phypa1|38998,Phypa1|29093,Phypa1|27443,Phypa1|23997  
Phypa1|21362  
Phypa1|26124,Phypa1|36862  
AT4G27680,AT5G53540 Phypa1|25546,Phypa1|24174  
AT2G03670 Phypa1|17148  
AT1G52370,AT4G28360  
Phypa1|27730  
Phypa1|31269  
AT5G48700,AT5G48710,AT5G55855,AT2G32765,AT5G55170,AT5G55160,AT4G26840  
Phypa1|29973,Phypa1|33120  
AT3G52260 Phypa1|30141  
AT1G75710,AT2G29660,AT5G54630,AT4G27240,AT1G11490 Phypa1|37877,Phypa1|32000  
AT5G01400,AT1G27595 Phypa1|27127  
AT1G78540,AT1G17040 Phypa1|6622,Phypa1|25998  
AT1G63050,AT1G12640 Phypa1|35931,Phypa1|2668,Phypa1|24055  
AT2G18410 Phypa1|35277  
AT1G04690 Phypa1|36867,Phypa1|38360  
Phypa1|23237  
AT4G23895 Phypa1|2055,Phypa1|31672  
AT5G49010 Phypa1|27629  
AT2G32600 Phypa1|19333,Phypa1|1088,Phypa1|21608  
AT5G03345 Phypa1|34314,Phypa1|35129  
AT1G70220,AT1G24050 Phypa1|24400,Phypa1|38509  
AT3G19090,AT2G43970,AT5G46250 Phypa1|33503,Phypa1|10852,Phypa1|28611  
AT5G40660 Phypa1|39621  
AT1G32930 Phypa1|35084,Phypa1|25023,Phypa1|35358,Phypa1|25734  
AT1G22015,AT1G77810  
AT5G53340,AT2G25300,AT4G32120 Phypa1|28345,Phypa1|27493  
AT1G11730,AT2G32430,AT1G05170,AT4G26940  
AT1G53290,AT3G14960,AT2G26100 Phypa1|38689,Phypa1|1049  
AT1G33430  
AT3G13050 Phypa1|27972  
Phypa1|37450,Phypa1|24738,Phypa1|19378,Phypa1|30721  
AT1G17720,AT1G51690  
Phypa1|37427,Phypa1|30638,Phypa1|23893,Phypa1|29831,Phypa1|2526,Phypa1|28001,Phypa1|23933

AT1G78280 Phypa1|28354,Phypa1|36844  
AT3G63510,AT5G47970 Phypa1|2494,Phypa1|22240,Phypa1|2392  
AT2G43430,AT2G31350,AT1G06130 Phypa1|26895  
Phypa1|32777  
AT3G10850 Phypa1|37094  
AT4G20130 Phypa1|28077  
AT3G18580 Phypa1|26624,Phypa1|28853,Phypa1|25070  
AT2G47410,AT5G49430 Phypa1|36149  
AT2G31380,AT1G06040 Phypa1|24264,Phypa1|33658,Phypa1|21968,Phypa1|2964,Phypa1|37717  
AT1G75540,AT4G39070  
AT1G78600,AT4G10240  
AT4G38960,AT2G21320 Phypa1|36309,Phypa1|34687  
AT5G53580 Phypa1|7937  
AT1G06690 Phypa1|18801  
AT5G54830 Phypa1|27977  
AT5G52590 Phypa1|38037  
AT5G64816 Phypa1|15204,Phypa1|17612  
AT5G06220,AT3G11560 Phypa1|33,Phypa1|37443,Phypa1|30074,Phypa1|25828  
AT5G08030,AT1G74210 Phypa1|6601  
AT1G80600 Phypa1|24547,Phypa1|38067  
Phypa1|31344  
AT5G46180 Phypa1|8497,Phypa1|37177  
Phypa1|31285  
AT5G48640,AT5G48630 Phypa1|30646,Phypa1|5329  
AT5G67370 Phypa1|25844  
AT5G11840Phypa1|2037,Phypa1|1525  
AT1G64750,AT5G45010  
Phypa1|15460  
Phypa1|4468  
AT3G09735,AT2G37120,AT3G53370 Phypa1|32468  
AT5G23570 Phypa1|28587  
Phypa1|15504  
AT2G41750 Phypa1|674  
AT5G56740 Phypa1|34671  
AT3G17020,AT3G53990,AT3G03270  
Phypa1|2150,Phypa1|2723,Phypa1|35675,Phypa1|26599,Phypa1|24272  
AT3G11910,AT5G06600 Phypa1|36440,Phypa1|39044,Phypa1|37036  
AT5G59430,AT3G46590 Phypa1|841  
Phypa1|28040  
AT3G12560,AT5G13820  
AT1G07540  
AT3G53790 Phypa1|11631  
AT1G19990,AT5G11600 Phypa1|1115,Phypa1|12249  
AT1G20770 Phypa1|33274  
AT3G44880 Phypa1|29927,Phypa1|27678  
AT4G25650 Phypa1|24701  
AT1G22660 Phypa1|925  
AT5G50310 Phypa1|36104  
AT4G14870 Phypa1|25301  
AT2G34710,AT1G30490,AT5G60690,AT4G32880,AT1G52150  
Phypa1|36583,Phypa1|36720,Phypa1|37520,Phypa1|36755,Phypa1|25064  
Phypa1|3021  
AT5G65165  
AT2G34520 Phypa1|28093  
AT5G40650,AT3G27380 Phypa1|191  
AT1G51040,AT1G49340 Phypa1|36954,Phypa1|14818  
AT5G19050 Phypa1|39267  
AT3G27730  
AT2G42270,AT1G20960 Phypa1|38397  
AT5G61140Phypa1|27135  
Phypa1|23448  
Phypa1|26013  
AT4G28990 Phypa1|33283  
AT1G22040 Phypa1|33948,Phypa1|36529  
AT5G43140  
Phypa1|31728  
AT5G19750 Phypa1|1095,Phypa1|32477  
Phypa1|212  
Phypa1|31989  
AT4G33905,AT2G14860  
Phypa1|1108  
AT3G20740 Phypa1|3083  
AT3G03500,AT5G17570 Phypa1|25813,Phypa1|30408  
AT5G13190 Phypa1|818  
Phypa1|17021  
AT2G20760,AT2G40060,AT3G51890 Phypa1|31773,Phypa1|4562,Phypa1|778  
AT5G50100 Phypa1|29248  
AT5G23535 Phypa1|31267,Phypa1|37502  
AT5G45040 Phypa1|26325  
AT1G04080,AT5G46400 Phypa1|25599,Phypa1|38658,Phypa1|13778,Phypa1|28515  
AT2G21860 Phypa1|39593  
AT5G08160 Phypa1|39465

AT4G03550,AT4G04970 Phypa1|38063,Phypa1|36069,Phypa1|36710  
AT3G14780,AT2G30680  
AT3G59100,AT1G06490  
AT2G13680 Phypa1|28911  
AT2G36850,AT3G07160  
Phypa1|36723,Phypa1|38526,Phypa1|25203,Phypa1|24971,Phypa1|37318,Phypa1|26690,Phypa1|28454,  
Phypa1|36911  
AT3G14570  
AT1G05570,AT2G31960,AT5G36870,AT5G13000  
AT2G21160,AT2G16595 Phypa1|39278,Phypa1|34751,Phypa1|18125  
AT2G32560,AT2G26850,AT2G41170 Phypa1|34537,Phypa1|29086,Phypa1|21973  
AT5G52960 Phypa1|29102  
AT3G48470 Phypa1|29516  
AT5G49840  
AT5G53350  
Phypa1|30880  
AT1G33360  
Phypa1|423  
Phypa1|447,Phypa1|27438  
Phypa1|36301,Phypa1|23993  
Phypa1|567  
Phypa1|38242  
Phypa1|31296  
AT1G19580,AT5G66510,AT1G47260  
AT3G48680,AT5G63510 Phypa1|24439,Phypa1|25892  
AT3G12640 Phypa1|34040  
AT2G47070,AT3G60030 Phypa1|36594  
Phypa1|26187  
Phypa1|13955  
AT3G24110,AT4G26470 Phypa1|28875,Phypa1|38108  
AT2G29580,AT1G07360,AT5G07060,AT5G04210 Phypa1|14312,Phypa1|36888  
AT3G49720,AT5G65810 Phypa1|26778  
AT5G43660,AT1G48700,AT1G48740,AT1G47940,AT3G18210,AT1G22950 Phypa1|27075,Phypa1|23793  
AT1G78590 Phypa1|36740  
AT2G05620 Phypa1|25129  
Phypa1|12601  
AT2G04690 Phypa1|27667  
AT1G67060 Phypa1|30660  
AT5G55940,AT5G51620 Phypa1|6940,Phypa1|2673  
Phypa1|6316  
AT5G03650,AT2G36390  
Phypa1|26370,Phypa1|38262,Phypa1|36690  
AT3G20440 Phypa1|37575  
AT2G27480 Phypa1|27194  
AT5G04170,AT3G10300 Phypa1|758,Phypa1|1185  
Phypa1|28674  
AT3G12300 Phypa1|3040,Phypa1|34549,Phypa1|26051  
AT1G29700 Phypa1|14927,Phypa1|29447  
AT5G15550 Phypa1|35262  
Phypa1|6916  
AT3G24190 Phypa1|32218,Phypa1|37962  
Phypa1|26864,Phypa1|28570  
AT1G79600 Phypa1|36724  
AT5G24970 Phypa1|37428  
Phypa1|22668  
Phypa1|5513  
Phypa1|25535  
AT2G39190 Phypa1|26117,Phypa1|37507,Phypa1|14578  
Phypa1|12236,Phypa1|27789  
AT4G31390 Phypa1|28723  
AT1G71810 Phypa1|28907,Phypa1|28978  
AT5G16760 Phypa1|39019,Phypa1|38220  
AT4G08170,AT4G33770 Phypa1|39451,Phypa1|22116,Phypa1|32792  
Phypa1|249,Phypa1|1377  
Phypa1|31813  
Phypa1|33733  
AT5G36930,AT2G17050,AT1G57630  
AT4G23515,AT1G51280,AT5G45000,AT5G45220,AT5G45080,AT5G45070,AT1G65390,AT5G44900,AT5G44910,AT4  
G19925,AT4G19920,AT4G19910,AT5G44920,AT1G57670,AT4G19515,AT4G19470,AT4G23510,AT4G11340,AT5G47  
280,AT1G47370  
Phypa1|4812  
Phypa1|29251  
AT2G17055  
AT4G09430,AT1G72840,AT1G17600,AT5G40100,AT1G72860,AT5G48770,AT1G72920,AT1G72940,AT1G72950,AT1  
G72900,AT1G72910,AT1G17615,AT1G72890,AT4G09420,AT1G72850,AT5G48780,AT1G17610,AT5G40090,AT1G72  
870  
Phypa1|281  
AT1G57830 Phypa1|24898  
Phypa1|2126  
AT5G45260,AT5G45050,AT4G36140,AT5G45210,AT3G51560,AT4G19520,AT5G45240  
AT1G19960,AT2G32140  
Phypa1|25014

AT5G41740,AT5G41750,AT5G41540,AT5G41550,AT5G40910,AT1G64070,AT2G16870,AT1G63870,AT1G63880,AT1G63750,AT5G58120,AT5G38850,AT1G63730,AT1G63740,AT1G56510,AT1G56520,AT1G56540,AT1G66090,AT5G49140,AT4G11170,AT5G18350,AT5G18370,AT5G18360,AT5G17970,AT1G69550,AT5G11250,AT2G14080,AT3G04220,AT5G38350,AT1G65850,AT5G38340,AT3G44630,AT3G44480,AT3G44400,AT3G44670,AT3G25510,AT5G44510,AT3G04210,AT5G46470,AT5G46450,AT5G40060,AT5G22690,AT4G08450,AT5G46490,AT1G31540,AT5G46270,AT5G46260,AT5G46520,AT5G46510,AT4G16920,AT4G16950,AT4G16860,AT4G16960,AT4G16940,AT4G16890,AT4G16900,AT5G51630,AT4G04110,AT1G57650,AT4G19500,AT4G16990  
AT5G38344,AT4G16930,AT4G16880  
AT1G27170,AT1G27180,AT5G46500,AT5G17680,AT4G12020  
AT1G52900,AT1G61105  
Phypa1|28486  
Phypa1|27517  
AT2G03300,AT2G03030,AT1G57850  
AT2G20145  
AT5G45230,AT2G17060,AT4G36150,AT5G45200,AT5G45060,AT5G45250,AT3G51570,AT4G19530,AT5G17880,AT5G44870,AT4G19510,AT4G12010  
AT1G60320,AT1G09665  
AT4G03750,AT4G09360,AT1G72930  
AT3G63250,AT3G22740,AT3G25900 Phypa1|4200,Phypa1|26877,Phypa1|31730  
AT3G19040,AT1G32750 Phypa1|33616,Phypa1|17926  
AT4G15520 Phypa1|229  
AT5G53480 Phypa1|39599,Phypa1|37606  
AT3G13740,AT1G55140 Phypa1|25816  
AT5G17380 Phypa1|39601  
AT5G11970,AT2G19460,AT3G13910,AT1G72720,AT2G47480,AT3G62640,AT3G05725,AT4G09890  
Phypa1|851,Phypa1|38831,Phypa1|27144,Phypa1|28278  
AT4G22380,AT5G20160,AT4G12600  
Phypa1|38688,Phypa1|36250,Phypa1|36696,Phypa1|38472  
Phypa1|1593,Phypa1|38704  
AT2G33820  
AT1G79900 Phypa1|39262,Phypa1|10884  
AT1G78180,AT5G64970  
Phypa1|27292,Phypa1|26316  
AT4G39460,AT1G34065 Phypa1|37281,Phypa1|21302  
AT5G48970,AT3G21390 Phypa1|36855  
AT4G01100Phypa1|25269,Phypa1|36882  
Phypa1|27490,Phypa1|1489,Phypa1|2298  
Phypa1|27758  
AT5G46800 Phypa1|37804,Phypa1|30835,Phypa1|630  
Phypa1|1993  
AT5G01500,AT3G51870  
AT5G42130 Phypa1|29439  
AT4G32400  
AT1G25380,AT2G47490 Phypa1|26520,Phypa1|24198,Phypa1|31883  
Phypa1|10590  
AT1G74240 Phypa1|29378  
AT4G26180  
Phypa1|35255  
AT5G66380 Phypa1|27916  
Phypa1|31920  
Phypa1|30998  
Phypa1|28356,Phypa1|1441,Phypa1|36201  
AT3G20240 Phypa1|37039  
AT1G07025  
AT1G07030,AT2G30160 Phypa1|35585,Phypa1|3081  
AT2G37890,AT3G53940,AT3G55640 Phypa1|36636,Phypa1|28740  
Phypa1|3201,Phypa1|27604  
AT1G14560 Phypa1|30263  
Phypa1|39546  
AT4G11440Phypa1|25484,Phypa1|1985,Phypa1|31564  
AT5G60990 Phypa1|36248  
Phypa1|31399  
AT5G26742 Phypa1|24712,Phypa1|26390,Phypa1|1369,Phypa1|2244  
Phypa1|20749,Phypa1|25121  
AT5G65900  
AT3G58510,AT2G42520,AT3G58570 Phypa1|32,Phypa1|34267,Phypa1|926,Phypa1|23966  
AT5G14610,AT3G01540  
AT1G55150 Phypa1|36627  
AT2G33730  
Phypa1|29647  
AT3G61240,AT2G45810  
AT5G54910 Phypa1|911  
Phypa1|23936,Phypa1|36436,Phypa1|25776  
AT1G31970 Phypa1|38381  
AT1G16280 Phypa1|39297  
AT3G16840 Phypa1|26734  
AT1G71280,AT1G71370,AT5G05450 Phypa1|25962  
Phypa1|6389  
AT4G00660  
AT5G62190 Phypa1|32618,Phypa1|26691  
AT3G53110Phypa1|30892,Phypa1|28097  
AT3G22310,AT3G22330

Phypa1|20745  
 AT4G16630 Phypa1|25545  
 AT3G09720 Phypa1|1803  
 Phypa1|27819,Phypa1|27822,Phypa1|35880,Phypa1|31197  
 AT3G06980 Phypa1|3921  
 AT2G07750,AT1G63250  
 AT1G12770 Phypa1|959  
 AT3G18600  
 AT1G59990 Phypa1|36546  
 Phypa1|3922  
 AT5G51280,AT4G33370 Phypa1|39363  
 Phypa1|30270,Phypa1|36641  
 Phypa1|18304  
 AT4G15850 Phypa1|28679  
 AT5G19210 Phypa1|17506  
 AT3G19760  
 Phypa1|10596,Phypa1|27200  
 AT2G47330 Phypa1|29477  
 Phypa1|1916  
 Phypa1|20055  
 AT2G40700 Phypa1|27417  
 Phypa1|1391,Phypa1|30740,Phypa1|30853,Phypa1|31375  
 AT4G09730 Phypa1|31790  
 AT5G63120  
 Phypa1|17842  
 Phypa1|38782  
 AT4G34910 Phypa1|8701  
 Phypa1|30902  
 AT5G11200,AT5G11170 Phypa1|19191,Phypa1|37164  
 AT3G06480  
 Phypa1|24871  
 Phypa1|2975,Phypa1|24114,Phypa1|3025  
 AT5G08620,AT5G08610,AT5G63630 Phypa1|29283  
 Phypa1|39794  
 AT3G02065 Phypa1|33146  
 AT3G09620,AT1G20920 Phypa1|33826,Phypa1|29878  
 AT3G13920,AT1G54270,AT1G72730 Phypa1|39671,Phypa1|33371,Phypa1|23932,Phypa1|25616  
 AT1G51380  
 AT1G77050 Phypa1|1363  
 AT5G60540 Phypa1|2994,Phypa1|6844,Phypa1|31481  
 AT2G42120 Phypa1|14595  
 AT3G61870 Phypa1|26858  
 AT1G74880 Phypa1|34873  
 AT2G14635,AT3G60350,AT2G44900 Phypa1|27299,Phypa1|36939,Phypa1|36059  
 AT5G51540 Phypa1|37057  
 AT5G24850 Phypa1|38140  
 AT4G10760 Phypa1|1765  
 Phypa1|17072  
 AT1G59610,AT1G10290 Phypa1|38103,Phypa1|25906,Phypa1|23764,Phypa1|27643  
 AT4G34340,AT5G15570,AT3G02160 Phypa1|599  
 AT2G39440 Phypa1|10814  
 AT1G65960,AT5G17330,AT2G02000,AT2G02010,AT3G17760  
 Phypa1|23770,Phypa1|26722,Phypa1|35996,Phypa1|2259  
 Phypa1|10812  
 AT3G17720  
 AT2G36930 Phypa1|32530  
 Phypa1|14755,Phypa1|34650,Phypa1|5135,Phypa1|35464,Phypa1|32706,Phypa1|31951,Phypa1|33510  
 Phypa1|8147,Phypa1|30600  
 AT2G01830,AT1G27320,AT5G35750 Phypa1|36525,Phypa1|17856,Phypa1|28839  
 Phypa1|26304,Phypa1|25588,Phypa1|154,Phypa1|28695,Phypa1|24436  
 Phypa1|37992  
 Phypa1|36112  
 Phypa1|25286  
 Phypa1|31886,Phypa1|37824  
 Phypa1|31428  
 Phypa1|7660  
 Phypa1|34084,Phypa1|7897,Phypa1|408  
 Phypa1|1743  
 AT2G17820 Phypa1|25016,Phypa1|26003  
 AT4G00450 Phypa1|4555,Phypa1|25135,Phypa1|37623  
 AT3G60820 Phypa1|8722,Phypa1|28867  
 AT4G28590,AT2G31840 Phypa1|35516  
 AT5G51960 Phypa1|33344  
 AT2G40840 Phypa1|29445  
 AT3G01560,AT5G14540 Phypa1|38093,Phypa1|37155,Phypa1|33970,Phypa1|25615  
 Phypa1|31124  
 AT1G66860,AT5G38200,AT1G15040 Phypa1|37245  
 AT3G18890 Phypa1|26296  
 Phypa1|34498,Phypa1|23533  
 Phypa1|33194  
 AT5G63960 Phypa1|8731,Phypa1|31858  
 AT4G39880 Phypa1|36895

AT2G33255 Phypa1|35989,Phypa1|36225  
AT5G01700,AT5G26010,AT4G32950,AT3G05640,AT5G27930,AT3G16800,AT1G16220,AT1G79630,AT3G02750,AT5  
G36250,AT4G03415,AT1G03590 Phypa1|33186,Phypa1|510,Phypa1|36745,Phypa1|35972  
AT4G15930 Phypa1|30155,Phypa1|28767  
AT2G32840,AT1G04930 Phypa1|33686  
AT3G60370 Phypa1|26323  
AT1G64350 Phypa1|29232  
AT3G07100 Phypa1|39636,Phypa1|39787,Phypa1|6599  
AT4G32640,AT3G44340 Phypa1|9114,Phypa1|26498  
AT5G18480 Phypa1|25891,Phypa1|30640  
AT5G48385,AT4G00650,AT5G27230,AT1G31814,AT5G16320 Phypa1|38180  
AT2G09990,AT5G18380,AT3G04230  
Phypa1|36136,Phypa1|37699,Phypa1|37688,Phypa1|29767,Phypa1|39304  
AT5G44320,AT4G20980 Phypa1|465,Phypa1|953,Phypa1|27297  
AT5G06970 Phypa1|30556  
AT4G11670  
Phypa1|10778  
AT2G25800,AT2G20010 Phypa1|27098,Phypa1|30300,Phypa1|39150  
AT1G04470,AT2G33420  
AT1G76450 Phypa1|36068  
AT4G16146,AT1G69510,AT5G64130 Phypa1|2200,Phypa1|2216  
AT5G13610,AT1G69380 Phypa1|26723,Phypa1|36506  
AT4G09620 Phypa1|25137  
AT4G35335,AT5G41760 Phypa1|39396  
AT4G38350,AT1G42470 Phypa1|24705,Phypa1|27381  
Phypa1|6392,Phypa1|37184,Phypa1|36355  
AT1G30360  
Phypa1|36475,Phypa1|37633,Phypa1|36551,Phypa1|13169,Phypa1|11560,Phypa1|38222,Phypa1|23878,  
Phypa1|27176  
AT1G69450,AT3G01100,AT1G58520,AT1G10090,AT3G54510 Phypa1|36830,Phypa1|26725  
AT1G62320,AT1G11960,AT4G04340,AT4G22120,AT4G15430,AT3G21620,AT4G02900,AT1G32090  
Phypa1|24944,Phypa1|30062  
Phypa1|12142  
AT3G27390,AT5G40640,AT4G12680,AT4G37030 Phypa1|25030,Phypa1|1807,Phypa1|38582  
AT5G60410 Phypa1|33139,Phypa1|31940,Phypa1|33609,Phypa1|31745  
AT5G11330Phypa1|38295  
AT2G45670  
Phypa1|33128,Phypa1|3526,Phypa1|36389,Phypa1|1435,Phypa1|38177,Phypa1|27717,Phypa1|38886  
AT1G27530 Phypa1|37739  
AT4G38380,AT2G38330,AT1G51340,AT3G08040 Phypa1|11090,Phypa1|19136,Phypa1|24825  
AT2G17780,AT4G35920 Phypa1|27626,Phypa1|120,Phypa1|664,Phypa1|27631  
AT2G29540 Phypa1|26910  
AT1G21360,AT3G21260,AT2G33470 Phypa1|24181  
AT5G06770,AT3G12130 Phypa1|26684,Phypa1|36644  
AT1G68185 Phypa1|32443,Phypa1|34448  
AT1G75150,AT5G66540 Phypa1|27525  
AT2G32850 Phypa1|33799  
AT1G31940,AT2G35585 Phypa1|34104  
AT1G32400,AT2G20740,AT4G28770,AT2G20230  
Phypa1|32961,Phypa1|37555,Phypa1|26634,Phypa1|2089,Phypa1|2069  
AT2G13100,AT3G47420,AT1G30560,AT4G25220,AT4G17550 Phypa1|2550,Phypa1|59  
AT3G03880,AT1G55340 Phypa1|36264,Phypa1|4091,Phypa1|27436,Phypa1|35330,Phypa1|37117  
AT5G39590 Phypa1|29547,Phypa1|28841  
AT4G27090,AT2G20450 Phypa1|24109,Phypa1|38919,Phypa1|37969,Phypa1|36878  
AT2G46560 Phypa1|27702  
AT2G06925 Phypa1|19508,Phypa1|30193  
AT4G09800,AT1G22780,AT1G34030  
Phypa1|36089,Phypa1|37646,Phypa1|37741,Phypa1|36090,Phypa1|38746,Phypa1|39364  
AT4G30720 Phypa1|39666  
AT2G24410 Phypa1|1313  
AT3G20550 Phypa1|25246  
AT5G54260 Phypa1|1361  
AT3G56160 Phypa1|32984  
AT4G24270 Phypa1|27914  
AT3G08505 Phypa1|28369  
AT4G10140,AT1G33490 Phypa1|33203,Phypa1|37261  
AT2G17470,AT1G68600,AT1G25480,AT3G18440,AT1G18420 Phypa1|3936,Phypa1|33529  
AT1G03630,AT5G54190,AT4G27440 Phypa1|27636,Phypa1|39145  
AT1G77710 Phypa1|34944  
AT1G18460,AT1G73920 Phypa1|36015,Phypa1|37626,Phypa1|36171,Phypa1|34465  
AT3G55830 Phypa1|38853  
AT4G24140,AT1G64670,AT5G41900 Phypa1|1842,Phypa1|970  
AT5G17780,AT5G17720 Phypa1|597,Phypa1|24505  
AT5G57360,AT2G18915,AT5G23410,AT1G68050,AT1G51550 Phypa1|27221,Phypa1|503  
AT5G16090  
AT1G16190,AT1G79650 Phypa1|28889,Phypa1|2500,Phypa1|1219,Phypa1|29748,Phypa1|26461  
AT3G02540,AT5G38470  
Phypa1|10927  
AT5G61780,AT5G07350 Phypa1|37762  
AT1G17290,AT1G72330 Phypa1|24723,Phypa1|27840  
AT1G70580,AT1G23310 Phypa1|39619,Phypa1|24002,Phypa1|23833  
AT4G22970,AT5G28550,AT4G24300 Phypa1|32483

AT1G68940  
     Phypa1|3743  
     Phypa1|14645,Phypa1|14762,Phypa1|17696  
 AT1G76390,AT1G20780      Phypa1|36933,Phypa1|27908,Phypa1|24474,Phypa1|24477,Phypa1|35178  
     Phypa1|909,Phypa1|25751  
 AT1G21710      Phypa1|572  
     Phypa1|37601  
 AT1G55325      Phypa1|32355  
 AT3G12590      Phypa1|30401  
 AT3G45090,AT5G60760      Phypa1|424,Phypa1|25108,Phypa1|24703  
     Phypa1|30738  
 AT2G45290,AT3G60750      Phypa1|12900,Phypa1|23915,Phypa1|2693  
     Phypa1|39359  
 AT1G24310      Phypa1|28240,Phypa1|38489  
 AT1G16720      Phypa1|37054,Phypa1|30091  
 AT1G70820,AT5G17530      Phypa1|14376  
 AT1G48350      Phypa1|29264,Phypa1|2750,Phypa1|25930,Phypa1|28916  
 AT1G14205      Phypa1|31265  
 AT1G17440,AT3G10070      Phypa1|1210  
 AT3G46740,AT1G35860,AT4G09080      Phypa1|36208,Phypa1|35386,Phypa1|24396  
 AT1G35880      Phypa1|38550  
     Phypa1|30918  
 AT2G05990      Phypa1|27460,Phypa1|25540  
 AT2G32060,AT1G15930      Phypa1|24103,Phypa1|2194,Phypa1|28844  
 AT3G20630      Phypa1|30893  
     Phypa1|35601  
 AT3G12530      Phypa1|38922  
     Phypa1|30873  
     Phypa1|24751  
 AT3G22460,AT4G14880  
     Phypa1|38937  
 AT5G28030,AT5G28020,AT3G04940  
     Phypa1|22616  
 AT2G43750,AT3G59760      Phypa1|33318,Phypa1|25171  
 AT3G03630  
     Phypa1|38025  
 AT3G61440  
 AT1G55880      Phypa1|37510  
 AT5G48545      Phypa1|27673  
 AT5G42740      Phypa1|37989,Phypa1|29265,Phypa1|36432,Phypa1|20518,Phypa1|25046  
 AT2G31650,AT1G05830      Phypa1|27326,Phypa1|37855,Phypa1|27052  
 AT1G76850,AT1G21170      Phypa1|25195,Phypa1|26021,Phypa1|24872,Phypa1|25905  
 AT1G21312,AT1G76940      Phypa1|786  
 AT5G45920,AT5G62930,AT3G11210,AT2G38180      Phypa1|39375  
 AT5G51070      Phypa1|24497,Phypa1|36240  
 AT5G15450      Phypa1|37547,Phypa1|26580  
     Phypa1|14837  
     Phypa1|25365,Phypa1|24038,Phypa1|23867,Phypa1|33552  
 AT1G74310      Phypa1|39556  
 AT4G14670  
     Phypa1|27283  
 AT3G45450      Phypa1|3912  
 AT2G25140  
 AT5G50920  
 AT3G48870  
     Phypa1|22837  
 AT5G14120,AT3G01930,AT5G50520,AT5G50630      Phypa1|29651,Phypa1|17349,Phypa1|1809  
 AT2G30300,AT5G45275,AT4G19450,AT3G01630,AT1G31470      Phypa1|7848,Phypa1|32614  
     Phypa1|967  
 AT1G80530      Phypa1|36604,Phypa1|25411  
     Phypa1|35551,Phypa1|35470  
     Phypa1|27906  
     Phypa1|27909  
 AT2G28120,AT2G39210      Phypa1|29146,Phypa1|1813  
 AT1G18940,AT1G74780,AT2G34355,AT2G34350      Phypa1|20783  
 AT4G34950,AT2G16660      Phypa1|36318  
     Phypa1|37060  
 AT1G80860      Phypa1|26964  
 AT4G16030,AT1G02780,AT4G02230,AT3G16780  
     Phypa1|32865,Phypa1|37312,Phypa1|39411,Phypa1|2447,Phypa1|38827,Phypa1|33897,Phypa1|24066,P  
 hypa1|1555  
 AT3G28700      Phypa1|38993  
 AT1G06870,AT2G30440  
 AT3G24590      Phypa1|1973  
     Phypa1|2303,Phypa1|1120  
     Phypa1|31145,Phypa1|31422  
 AT5G67130,AT1G13680,AT3G19310,AT1G49740  
     Phypa1|25665,Phypa1|26581,Phypa1|30340,Phypa1|10860  
     Phypa1|23196,Phypa1|20623,Phypa1|22912,Phypa1|30745,Phypa1|30587  
 AT1G26570,AT5G15490,AT3G01010,AT5G39320,AT3G29360  
     Phypa1|38593,Phypa1|39603,Phypa1|39645,Phypa1|39088



AT5G10160,AT2G22230 Phypa1|1548,Phypa1|39099,Phypa1|2090  
AT4G36080,AT2G17930 Phypa1|36703  
AT2G47720,AT3G62770 Phypa1|2644,Phypa1|26028,Phypa1|25470  
AT4G30510 Phypa1|23788  
AT5G05150  
AT2G40810,AT3G56440  
AT5G58100 Phypa1|38470  
AT5G57600,AT5G57590 Phypa1|38726  
AT4G14680,AT3G22890,AT5G43780,AT1G19920 Phypa1|28532,Phypa1|30119  
AT4G32910 Phypa1|27955  
AT3G63150,AT3G05310,AT5G27540 Phypa1|2962,Phypa1|37559,Phypa1|29468,Phypa1|27356  
AT4G33865,AT3G44010,AT3G43980,AT4G39380,AT2G36960  
Phypa1|26489,Phypa1|38190,Phypa1|26513,Phypa1|36832  
Phypa1|30449  
Phypa1|28829,Phypa1|28852  
AT4G02260  
AT4G25910,AT5G49940 Phypa1|1152  
AT1G07210 Phypa1|27272  
Phypa1|12381  
AT2G44770,AT3G60260,AT3G43400,AT1G67400,AT1G03620,AT3G03610 Phypa1|23738  
Phypa1|35739  
AT5G66840  
Phypa1|5746  
AT5G44710 Phypa1|860  
AT4G25970,AT5G57190 Phypa1|30439,Phypa1|28791  
AT1G65540,AT3G59820 Phypa1|28398,Phypa1|37160  
AT2G36900,AT5G50440 Phypa1|31753,Phypa1|36803  
AT4G25720 Phypa1|36527  
AT1G48860,AT2G45300 Phypa1|2621,Phypa1|28135  
AT2G44640,AT3G06960 Phypa1|32046  
AT1G29150 Phypa1|3213,Phypa1|39003  
AT2G04305 Phypa1|30302,Phypa1|36876  
AT3G50830,AT4G37220,AT2G15970,AT2G23680  
Phypa1|25988,Phypa1|23761,Phypa1|28181,Phypa1|36487  
AT1G55980,AT1G56000 Phypa1|29112  
AT3G47340,AT5G10240,AT5G65010 Phypa1|36456,Phypa1|35708,Phypa1|14031,Phypa1|39627  
Phypa1|4431,Phypa1|22034,Phypa1|31228  
AT5G42990,AT1G45050,AT4G36410,AT1G75440 Phypa1|15997,Phypa1|39347  
AT3G08970 Phypa1|37782  
AT3G57340,AT5G05750  
Phypa1|35156  
Phypa1|5215,Phypa1|1305  
AT5G22060,AT3G44110 Phypa1|36129,Phypa1|30195,Phypa1|28651,Phypa1|27478  
Phypa1|28648  
AT3G62600 Phypa1|38884,Phypa1|37885  
Phypa1|28146  
AT1G63110,AT1G12730 Phypa1|9575,Phypa1|17464  
AT2G05120 Phypa1|28052  
AT1G70630 Phypa1|5612,Phypa1|39164,Phypa1|25287  
AT3G15354,AT1G53090 Phypa1|26510,Phypa1|36290  
Phypa1|25887,Phypa1|38369,Phypa1|28368,Phypa1|36858,Phypa1|34432  
AT5G23730,AT5G52250 Phypa1|37997,Phypa1|1047  
AT4G11110,AT2G46340  
AT2G32950 Phypa1|24884,Phypa1|39477,Phypa1|36896,Phypa1|34000  
AT4G20060 Phypa1|35701  
AT4G10570,AT4G10590,AT1G32850,AT2G40930,AT5G22030 Phypa1|6903  
AT2G33830,AT1G28330,AT5G44300 Phypa1|29773  
AT5G07340,AT5G61790 Phypa1|37382,Phypa1|2885,Phypa1|25433,Phypa1|26998  
Phypa1|2400  
Phypa1|21477,Phypa1|20908  
AT5G60020,AT2G29130,AT5G03260,AT2G38080,AT5G01190,AT5G58910,AT1G18140,AT2G46570,AT2G40370,AT5  
G05390,AT5G07130,AT2G30210,AT5G48100,AT5G09360 Phypa1|2926  
Phypa1|23518  
AT4G39830  
Phypa1|1159,Phypa1|36128,Phypa1|36894  
Phypa1|23495  
Phypa1|26947  
AT5G01040,AT5G01050,AT3G09220  
AT5G21105,AT5G21100 Phypa1|33091,Phypa1|19140,Phypa1|3294,Phypa1|28843,Phypa1|14002  
AT3G26750 Phypa1|31659  
AT5G37055 Phypa1|36058  
Phypa1|218  
AT2G38740 Phypa1|15689  
Phypa1|22002  
Phypa1|31982  
AT1G24610 Phypa1|38503  
AT4G19830 Phypa1|2100  
AT4G37630  
AT4G34160,AT3G50070,AT5G67260 Phypa1|32157,Phypa1|39640  
AT4G03270  
AT5G10440,AT5G65420,AT2G22490,AT1G70210  
AT5G02110Phypa1|33671

AT3G06100 Phypa1|623  
Phypa1|36937,Phypa1|24984,Phypa1|36382,Phypa1|7725  
AT1G80760,AT4G10380 Phypa1|29502  
AT5G37810,AT5G37820,AT4G18910,AT4G19030,AT2G29870,AT2G34390,AT1G31885  
AT4G04870 Phypa1|33309  
Phypa1|2599  
AT1G53850,AT3G14290 Phypa1|26642,Phypa1|36736,Phypa1|6329  
AT5G19720,AT1G25350 Phypa1|2618  
Phypa1|21353  
AT5G49030 Phypa1|2573  
AT2G36810 Phypa1|33935,Phypa1|18414  
AT5G62030 Phypa1|36713  
AT3G54230 Phypa1|32398,Phypa1|2610,Phypa1|7487  
AT1G30825,AT2G33385 Phypa1|29423,Phypa1|25748  
AT5G07120,AT5G58440,AT5G37050 Phypa1|36809  
AT4G23000,AT4G11800 Phypa1|28282,Phypa1|26840  
AT2G19880 Phypa1|16859,Phypa1|37544  
AT2G32480,AT1G05140 Phypa1|34328,Phypa1|24500,Phypa1|29057  
AT3G55390 Phypa1|37488,Phypa1|36589,Phypa1|27807  
AT4G16060 Phypa1|30398  
AT3G62870,AT2G47610  
Phypa1|36383,Phypa1|23777,Phypa1|37336,Phypa1|39153,Phypa1|29031,Phypa1|36926  
Phypa1|31187  
AT2G24090 Phypa1|1722,Phypa1|30211  
AT1G03475,AT4G03205 Phypa1|39522,Phypa1|24129  
Phypa1|27090  
AT5G08740 Phypa1|23565,Phypa1|27513  
AT1G66330 Phypa1|33170,Phypa1|26262,Phypa1|28232  
AT1G03770 Phypa1|34547,Phypa1|35718  
Phypa1|22584  
AT5G53920 Phypa1|26821  
AT1G19880 Phypa1|24827  
AT1G71750 Phypa1|24775  
AT5G35690 Phypa1|24125  
AT3G28710,AT3G28715 Phypa1|4195,Phypa1|24254  
AT2G38210 Phypa1|31482  
AT5G01410,AT2G38230 Phypa1|39628,Phypa1|34941,Phypa1|36101,Phypa1|36567  
AT3G16050  
AT5G26850,AT2G41830,AT5G21080,AT1G05960 Phypa1|33932,Phypa1|27363  
AT1G26880,AT1G69620,AT3G28900  
Phypa1|2417,Phypa1|38780,Phypa1|24158,Phypa1|1661,Phypa1|37576,Phypa1|36405,Phypa1|36407  
AT4G37925 Phypa1|34875  
AT3G05670 Phypa1|32562  
AT1G64390,AT4G11050,AT2G32990 Phypa1|25853,Phypa1|37335,Phypa1|26353,Phypa1|2903  
AT1G48930  
Phypa1|25093,Phypa1|26632  
AT1G75680,AT1G19940 Phypa1|35333,Phypa1|33094  
AT3G42155  
AT2G44540,AT2G44550,AT2G44560,AT2G44570,AT4G23560,AT4G09740  
AT5G49720,AT4G24260,AT1G65610 Phypa1|25787,Phypa1|34201,Phypa1|15864  
AT3G43860 Phypa1|28591,Phypa1|27479,Phypa1|27188  
AT4G02290,AT1G02800,AT1G71380,AT1G22880,AT1G23210,AT1G70710,AT4G39010,AT4G38990,AT4G39000  
Phypa1|27022,Phypa1|20307,Phypa1|25210,Phypa1|2558,Phypa1|27481,Phypa1|11769  
AT3G09310 Phypa1|358  
AT5G55500 Phypa1|39486  
AT2G38580 Phypa1|13155  
AT3G56290 Phypa1|2148  
AT3G15420 Phypa1|4995  
AT3G08900,AT3G02230,AT5G15650  
Phypa1|24167,Phypa1|38699,Phypa1|26683,Phypa1|2832,Phypa1|39070  
AT5G50750  
AT5G16510 Phypa1|33977,Phypa1|23974  
AT1G63210,AT1G65440 Phypa1|25344,Phypa1|25361  
AT1G61850 Phypa1|26760  
AT2G41370,AT3G57130 Phypa1|25852,Phypa1|90,Phypa1|25509  
AT4G17483,AT4G17480,AT4G17470,AT5G47340,AT5G47330,AT5G47350,AT3G60340  
Phypa1|36676,Phypa1|26987  
AT5G12950,AT5G12960 Phypa1|26538  
AT4G24500 Phypa1|33672  
AT1G77220,AT4G38360,AT1G23070  
Phypa1|28202,Phypa1|29129,Phypa1|38241,Phypa1|39736,Phypa1|487  
AT4G14990,AT3G22270,AT1G79090 Phypa1|25151,Phypa1|38026  
AT5G13860,AT3G12400,AT2G38830 Phypa1|36576,Phypa1|34964  
AT5G35980 Phypa1|30525,Phypa1|28050,Phypa1|24464,Phypa1|24459  
Phypa1|25140,Phypa1|28823  
AT5G40950 Phypa1|34300,Phypa1|36154  
Phypa1|35604  
Phypa1|37009,Phypa1|37957  
AT2G23740 Phypa1|27470  
AT4G03560  
Phypa1|5420,Phypa1|34922,Phypa1|34325,Phypa1|5648,Phypa1|33497,Phypa1|25749,Phypa1|32182,Phypa1|29495,Phypa1|26133

AT1G66510 Phypa1|39045  
AT1G14660,AT2G01980 Phypa1|31887,Phypa1|36038  
AT3G57910 Phypa1|2894  
AT3G02680 Phypa1|34788  
AT1G12840 Phypa1|5954,Phypa1|28425  
Phypa1|6281  
AT5G20290,AT5G59240 Phypa1|24236,Phypa1|37695,Phypa1|37677,Phypa1|37407,Phypa1|38570  
AT1G70660,AT1G23260,AT3G52560,AT2G36060 Phypa1|33096,Phypa1|38141,Phypa1|29910  
AT3G53570,AT4G24740,AT4G32660 Phypa1|39711,Phypa1|28054,Phypa1|27483  
AT4G19000,AT1G32130 Phypa1|27409  
AT5G17290 Phypa1|29218  
AT5G38460 Phypa1|29768  
AT5G42000,AT1G01230 Phypa1|27891  
AT3G06560,AT5G02670,AT2G25850,AT4G32850,AT1G17980 Phypa1|1378,Phypa1|24468  
AT5G51510 Phypa1|34203  
AT4G38225 Phypa1|26663,Phypa1|31639,Phypa1|32989  
AT5G11880,AT3G14390 Phypa1|3046,Phypa1|38754  
Phypa1|31364  
AT3G62840,AT2G47640 Phypa1|26167,Phypa1|15533,Phypa1|29762  
Phypa1|31050,Phypa1|31475  
AT4G27820,AT4G27830,AT3G62740,AT3G62750,AT5G16580,AT4G22100,AT1G45191,AT1G60090,AT1G02850,AT4  
G21760,AT1G61810,AT1G61820  
AT5G26000,AT5G25980,AT5G48375,AT1G51470,AT1G47600,AT1G51490,AT2G44480,AT5G44640,AT5G42260,AT2  
G25630,AT2G44450,AT3G60130  
AT5G36890 Phypa1|38964,Phypa1|23934,Phypa1|26929  
Phypa1|25951,Phypa1|37445  
AT3G18070,AT3G18080  
AT1G26560,AT5G54570  
Phypa1|3477  
AT2G44470,AT2G44460,AT3G60140,AT5G24550,AT5G24540,AT2G44490,AT3G60120,AT3G21370,AT1G52400,AT1  
G75940,AT1G66270,AT1G66280,AT3G09260,AT5G28510,AT3G03640,AT2G32860  
Phypa1|1174  
Phypa1|5503  
Phypa1|31449  
Phypa1|31691,Phypa1|12593,Phypa1|24271,Phypa1|25311  
AT5G48175  
Phypa1|594  
AT5G56280,AT4G26430 Phypa1|36344  
Phypa1|31384  
AT1G02500,AT4G01850,AT3G17390 Phypa1|2958,Phypa1|17632,Phypa1|29375,Phypa1|38960  
AT2G36880  
Phypa1|26166  
AT3G17430,AT1G48230  
AT4G32390,AT2G25520,AT5G25400,AT5G11230 Phypa1|37356,Phypa1|36518,Phypa1|37238  
AT3G14410,AT1G53660 Phypa1|37321  
AT2G16060,AT3G10520 Phypa1|36768,Phypa1|39792  
AT1G74030 Phypa1|33458,Phypa1|33365  
Phypa1|3069  
AT2G29560  
Phypa1|38499  
AT2G36530 Phypa1|24356,Phypa1|3276  
Phypa1|33993  
AT5G58787,AT3G47160,AT5G01520,AT1G24440,AT1G13195 Phypa1|37388,Phypa1|36499,Phypa1|9186  
AT3G62790,AT2G47690 Phypa1|1310,Phypa1|24409  
AT5G49945,AT4G24330 Phypa1|26024  
AT5G49930 Phypa1|27794  
AT3G54620,AT4G02640  
Phypa1|777  
Phypa1|2229  
AT5G28770 Phypa1|2231,Phypa1|39335,Phypa1|34673,Phypa1|166  
AT5G24800  
Phypa1|2228  
AT5G49880 Phypa1|1763  
AT1G15370 Phypa1|35948  
AT5G43750 Phypa1|34911  
AT1G27990 Phypa1|39683,Phypa1|36434,Phypa1|24189  
AT5G52420,AT5G23920 Phypa1|27208,Phypa1|37213,Phypa1|2033  
AT1G78450,AT1G17100,AT1G78460 Phypa1|28432,Phypa1|26527  
AT3G26380 Phypa1|38810  
AT4G02460 Phypa1|4199,Phypa1|18610,Phypa1|30830  
AT1G67960 Phypa1|30221  
AT4G13640,AT3G24120,AT1G79430,AT3G12730  
AT2G38300,AT2G40260,AT1G14600,AT2G42660  
Phypa1|34848,Phypa1|35115  
AT1G32240,AT4G17695,AT4G04580,AT5G16560  
Phypa1|13973,Phypa1|20499  
Phypa1|4405  
Phypa1|34292  
AT2G01060,AT4G28610,AT5G29000,AT3G04450,AT2G20400  
AT2G06020  
Phypa1|19646  
AT5G45580

Phypa1|2024,Phypa1|36064,Phypa1|6171,Phypa1|32419,Phypa1|2299,Phypa1|39318,Phypa1|923,Phypa1|8109,Phypa1|1081  
Phypa1|6701,Phypa1|9752,Phypa1|3468,Phypa1|17116  
AT3G04030,AT5G18240,AT1G69580 Phypa1|28191  
AT5G06800 Phypa1|35853,Phypa1|33088  
AT3G13040  
AT5G42630 Phypa1|33811  
AT5G12430,AT2G41520 Phypa1|36267  
AT5G21920 Phypa1|2174,Phypa1|30746  
Phypa1|6625  
Phypa1|34308  
Phypa1|34441  
AT5G24810 Phypa1|33596,Phypa1|36850  
Phypa1|38234  
AT5G01430,AT3G49420,AT1G05785,AT3G03180 Phypa1|37062  
AT5G64200 Phypa1|26057,Phypa1|35670  
AT3G57890,AT2G42230 Phypa1|38408,Phypa1|29368,Phypa1|27002,Phypa1|25606  
AT2G45520 Phypa1|12939  
AT1G14880,AT1G14870,AT5G35525,AT1G68610,AT1G68630,AT1G58320  
AT1G49030,AT3G18470,AT3G18450,AT3G18460  
Phypa1|24357,Phypa1|37953  
Phypa1|36357,Phypa1|37517  
AT1G52200 Phypa1|1633  
AT2G40935 Phypa1|1226,Phypa1|807,Phypa1|1225,Phypa1|806  
AT1G14030 Phypa1|30986  
AT5G53060,AT5G15270,AT1G14170,AT2G03110,AT5G46190,AT5G09560,AT5G64390,AT2G22600,AT1G51580  
Phypa1|1399  
AT2G45380,AT4G22740 Phypa1|35631  
AT5G64670 Phypa1|641  
AT4G17070 Phypa1|607,Phypa1|37632  
AT1G69070 Phypa1|36545  
AT1G43800  
AT5G16240,AT3G02630,AT2G43710,AT3G02620,AT3G02610,AT5G16230  
Phypa1|14597,Phypa1|15562,Phypa1|24246,Phypa1|37323  
Phypa1|30542,Phypa1|21102,Phypa1|13543  
AT5G66180 Phypa1|9772  
AT3G01660 Phypa1|24281  
AT4G29590 Phypa1|29956  
AT4G30580 Phypa1|28526  
Phypa1|26130  
AT1G26670,AT3G29100,AT5G39510,AT5G39630  
Phypa1|38164,Phypa1|38138,Phypa1|28632,Phypa1|27133  
AT3G52290,AT3G09710,AT5G03040,AT2G26410,AT2G33990,AT3G15050,AT5G35670,AT3G49380,AT3G59690,AT3G49260,AT5G62070,AT5G07240,AT3G16490,AT1G51960,AT4G29150,AT3G51380,AT4G14750,AT5G13460,AT1G76705,AT5G03960,AT2G26180,AT1G17480,AT1G72670,AT3G22190  
Phypa1|1406,Phypa1|1837,Phypa1|29753,Phypa1|30315,Phypa1|29377,Phypa1|29280,Phypa1|6991,Phypa1|672,Phypa1|1116,Phypa1|30372,Phypa1|25212,Phypa1|29623,Phypa1|34440,Phypa1|3253,Phypa1|4079  
Phypa1|26491,Phypa1|25068  
AT5G38420,AT5G38430,AT5G38410,AT1G67090  
Phypa1|38156,Phypa1|24115,Phypa1|30231,Phypa1|37072,Phypa1|34490,Phypa1|29438,Phypa1|24924,Phypa1|29217,Phypa1|30179,Phypa1|26437,Phypa1|26445,Phypa1|38186,Phypa1|26443,Phypa1|9576,Phypa1|23840,Phypa1|24262,Phypa1|26156,Phypa1|3024,Phypa1|24137,Phypa1|36218,Phypa1|2925,Phypa1|39328,Phypa1|270,Phypa1|35808,Phypa1|39657,Phypa1|39575,Phypa1|14775,Phypa1|14766,Phypa1|29275  
AT5G07670,AT5G51380,AT5G51370 Phypa1|26988,Phypa1|26470  
AT1G71220 Phypa1|6008  
AT1G47490,AT1G47500,AT3G19130,AT1G49600,AT5G54900,AT4G27000,AT1G11650,AT5G19350  
Phypa1|61,Phypa1|62,Phypa1|39677  
AT1G76380,AT1G20670,AT5G55040,AT5G55030 Phypa1|35069,Phypa1|34746,Phypa1|12731  
AT4G17020 Phypa1|24331  
AT3G49050,AT4G00500,AT5G37710 Phypa1|4272,Phypa1|24767,Phypa1|31922  
AT4G01040 Phypa1|37406  
AT5G67030 Phypa1|16897,Phypa1|36935,Phypa1|32164,Phypa1|35394  
Phypa1|33752  
AT5G17650,AT4G19200,AT5G45350,AT2G04063,AT1G31750 Phypa1|31787  
AT2G32260  
AT4G15130 Phypa1|1980  
Phypa1|1448,Phypa1|1447  
AT3G18640,AT2G33835,AT3G26850 Phypa1|292  
Phypa1|30045  
AT3G10370 Phypa1|24955  
Phypa1|30481,Phypa1|30777  
Phypa1|29997  
Phypa1|32502  
AT4G04955 Phypa1|37050,Phypa1|32521,Phypa1|24727  
AT5G18150,AT5G58375 Phypa1|34186  
AT3G43700,AT5G21010,AT3G03740,AT2G39760,AT5G19000,AT3G06190  
Phypa1|39626,Phypa1|28967,Phypa1|39152  
Phypa1|35831  
AT2G44060 Phypa1|23802,Phypa1|37476  
AT3G07560 Phypa1|33905  
AT3G05630,AT3G16785 Phypa1|37058,Phypa1|21443  
AT2G23090 Phypa1|36539

AT3G13170 Phypa1|25019  
AT5G02820 Phypa1|26586  
AT1G63990 Phypa1|29409  
AT1G05780,AT2G31710 Phypa1|20489  
AT2G31305 Phypa1|16115  
AT2G39340 Phypa1|39020,Phypa1|38080  
AT5G57320,AT4G30160,AT2G29890 Phypa1|33755  
AT2G41740,AT3G57410 Phypa1|37008,Phypa1|25259,Phypa1|29826  
AT4G06599 Phypa1|38331  
AT4G13730,AT1G04830 Phypa1|36781,Phypa1|2517  
AT3G07090 Phypa1|25965,Phypa1|27008  
AT2G35720 Phypa1|23740,Phypa1|37391  
Phypa1|34216  
AT2G35690,AT4G16760 Phypa1|39343  
AT3G54130 Phypa1|26065  
AT5G54750 Phypa1|21055,Phypa1|2462  
AT5G06620 Phypa1|37340  
AT4G13350,AT4G32630 Phypa1|33883,Phypa1|32469,Phypa1|34259,Phypa1|32099,Phypa1|29719  
AT5G16060 Phypa1|26103  
AT3G54020,AT2G37940,AT2G29525 Phypa1|27881,Phypa1|29015,Phypa1|2913  
AT5G66090 Phypa1|29132  
AT4G28450 Phypa1|38042  
Phypa1|31224  
AT2G45270 Phypa1|37000  
AT3G54470 Phypa1|23941,Phypa1|24139,Phypa1|30764  
AT5G64270 Phypa1|3524,Phypa1|36036  
Phypa1|3525  
AT1G73160,AT4G19460,AT5G59070 Phypa1|34884,Phypa1|27761  
AT5G40820 Phypa1|26949  
Phypa1|30743  
AT5G55130 Phypa1|29782  
AT4G29380 Phypa1|29050,Phypa1|37006  
Phypa1|30435  
AT4G29210  
Phypa1|30760  
AT4G39650,AT4G39640,AT1G69820 Phypa1|14493  
AT3G07630  
Phypa1|31307  
AT5G22630,AT3G44720,AT1G08250,AT2G27820  
AT1G11790Phypa1|25155,Phypa1|25242,Phypa1|26733,Phypa1|27119  
AT3G32400,AT5G07780,AT5G07760,AT5G07650,AT5G07770,AT1G42980  
AT3G32410,AT2G25050  
Phypa1|34335  
AT1G31810 Phypa1|31831,Phypa1|6  
AT5G58160  
Phypa1|14887  
AT4G35760 Phypa1|2232,Phypa1|26412  
AT1G21930,AT3G42150 Phypa1|1297,Phypa1|354  
AT5G08270,AT5G23200 Phypa1|26301  
AT1G58250,AT5G49670,AT5G49680 Phypa1|35073  
AT3G59400 Phypa1|30181,Phypa1|27723  
Phypa1|4365  
AT1G36020,AT1G35530 Phypa1|31723  
AT5G63905 Phypa1|33944,Phypa1|32057  
Phypa1|31188  
AT5G14200,AT1G31180,AT1G80560 Phypa1|24932  
AT1G16040 Phypa1|33802  
AT4G39980,AT1G22410,AT4G33510  
Phypa1|29425,Phypa1|25830,Phypa1|36193,Phypa1|36399,Phypa1|35645,Phypa1|35926,Phypa1|38783  
AT2G35640,AT1G31310  
Phypa1|680,Phypa1|683,Phypa1|1129,Phypa1|35373,Phypa1|32187,Phypa1|31526,Phypa1|11821  
AT1G80000,AT1G15280 Phypa1|34535,Phypa1|34534  
AT5G07630 Phypa1|25215  
Phypa1|31039  
AT5G11770Phypa1|17043,Phypa1|23900  
AT4G24880 Phypa1|26582  
AT2G18990,AT3G25580 Phypa1|38988  
AT2G24860 Phypa1|2173  
AT4G39280 Phypa1|39638  
Phypa1|27554  
AT5G09920 Phypa1|24177  
AT5G23060 Phypa1|37287,Phypa1|30203,Phypa1|29463  
AT1G30450 Phypa1|39113,Phypa1|38347,Phypa1|24613,Phypa1|36073  
Phypa1|27581,Phypa1|36182,Phypa1|25837  
AT4G24520,AT4G30210 Phypa1|39032,Phypa1|29519,Phypa1|38154,Phypa1|25739  
Phypa1|30000  
AT3G02280 Phypa1|36922  
AT3G24710  
AT3G20480 Phypa1|16558  
AT2G17580,AT3G48830,AT5G23690,AT1G28090 Phypa1|20864,Phypa1|32512  
Phypa1|30599  
Phypa1|21821,Phypa1|22941,Phypa1|21483

Phypa1|2563,Phypa1|1362  
Phypa1|27753,Phypa1|37107  
Phypa1|2274,Phypa1|26633,Phypa1|2277,Phypa1|37572,Phypa1|29110,Phypa1|27716,Phypa1|2275  
Phypa1|31454  
Phypa1|31203,Phypa1|23413  
Phypa1|9623,Phypa1|37216,Phypa1|38541,Phypa1|28849  
Phypa1|26383  
AT3G04580,AT3G23150,AT1G04310  
Phypa1|21314,Phypa1|20602,Phypa1|30501  
Phypa1|2264  
AT2G40940,AT1G66340 Phypa1|35916,Phypa1|37472,Phypa1|4904,Phypa1|38622  
AT5G53620 Phypa1|34358,Phypa1|15213  
AT4G15810  
AT2G16640,AT3G16620 Phypa1|37247,Phypa1|39038,Phypa1|39093,Phypa1|37161  
AT4G02482  
Phypa1|24675  
AT1G02280,AT5G05000 Phypa1|26369,Phypa1|36776  
AT4G02510,AT5G20300  
AT3G24200 Phypa1|24685  
Phypa1|392,Phypa1|31304,Phypa1|31291,Phypa1|31111,Phypa1|178,Phypa1|30023,Phypa1|30921,Phypa1|31055  
Phypa1|32056  
AT1G76680,AT1G76690,AT1G09400,AT1G17990,AT1G18020  
Phypa1|27338,Phypa1|30099,Phypa1|31695,Phypa1|31507  
Phypa1|11375,Phypa1|33147  
AT2G06050 Phypa1|2431,Phypa1|24267  
Phypa1|5902  
AT2G22740,AT2G35160  
AT5G47150,AT5G47160 Phypa1|31573  
Phypa1|39743,Phypa1|36005,Phypa1|1157  
AT5G13960 Phypa1|1365,Phypa1|34504  
AT5G04940,AT1G73100,AT2G24740,AT1G17770,AT2G05900,AT4G13460,AT2G33290  
Phypa1|28646  
AT3G03750 Phypa1|24499  
Phypa1|32331  
AT3G19860,AT4G36060,AT3G47640 Phypa1|34008,Phypa1|6626,Phypa1|33904  
AT5G45760 Phypa1|38291  
AT5G56900 Phypa1|36092  
Phypa1|1726  
AT2G07440,AT2G41310,AT3G57040  
Phypa1|1180,Phypa1|748,Phypa1|692,Phypa1|2064,Phypa1|2067,Phypa1|1533,Phypa1|1538  
AT1G74890,AT1G19050,AT5G62920,AT3G48100,AT1G59940,AT1G10470,AT2G40670,AT3G56380  
AT1G30070 Phypa1|29127  
AT3G03190,AT5G17220,AT2G47730,AT1G02930,AT1G02920,AT4G02520,AT2G02930,AT1G02950,AT1G02940,AT1G49860,AT3G62760 Phypa1|26250,Phypa1|26416,Phypa1|25449,Phypa1|36228,Phypa1|25468,Phypa1|32793  
AT2G30860,AT2G30870 Phypa1|36802,Phypa1|26919,Phypa1|36714,Phypa1|33478  
Phypa1|23396  
AT4G30000,AT1G69190 Phypa1|26400  
AT3G24820,AT1G69030,AT1G26300 Phypa1|28452,Phypa1|36752  
AT1G07010 Phypa1|109,Phypa1|115  
AT1G71440 Phypa1|2936,Phypa1|28068  
AT3G13970,AT1G54210 Phypa1|37029  
AT4G35910 Phypa1|25728  
AT5G06830 Phypa1|37975  
AT1G28380,AT4G24290,AT1G14780,AT1G29690 Phypa1|29241,Phypa1|27923  
AT1G08520 Phypa1|38703  
AT4G28030 Phypa1|35648,Phypa1|26131  
AT5G38110,AT1G66740 Phypa1|2127,Phypa1|38118,Phypa1|37977,Phypa1|243  
AT5G52090,AT5G37150,AT5G37140,AT5G37160,AT5G37030,AT4G05540,AT1G65810,AT1G65780  
AT2G19120,AT4G30100  
AT2G03270,AT5G47010  
AT1G16800 Phypa1|33879  
Phypa1|18590,Phypa1|35405  
AT4G15570 Phypa1|34428  
AT3G56230 Phypa1|3012,Phypa1|25347,Phypa1|8182  
AT1G78995 Phypa1|33213  
AT5G09240,AT5G09250 Phypa1|33638  
AT5G47880,AT3G26618,AT1G12920 Phypa1|30107,Phypa1|37337,Phypa1|2738,Phypa1|33564  
AT3G01910 Phypa1|29405,Phypa1|37531,Phypa1|13801  
AT2G39820,AT3G55620 Phypa1|35690,Phypa1|37673  
AT2G06520 Phypa1|35326,Phypa1|33829,Phypa1|35003,Phypa1|32338  
AT3G25060,AT3G16610  
Phypa1|1823  
Phypa1|809  
AT5G15340,AT3G08820,AT4G30700,AT1G11290,AT4G33990,AT3G12770,AT2G33760,AT2G01510,AT3G26780,AT3G11460,AT1G18485,AT5G40410  
AT3G13770,AT3G14330  
AT5G46440,AT5G46460,AT1G16480,AT5G09950,AT5G03800,AT5G47460,AT2G27610,AT3G13880,AT3G50420,AT2G46050,AT2G40720,AT5G27110,AT4G32430,AT3G47840,AT4G13650,AT1G56570,AT3G05340,AT2G33680,AT2G13600,AT3G25970,AT3G02330,AT5G42450,AT3G53360,AT3G20730,AT1G03540  
AT4G15720  
Phypa1|21961

AT1G14470  
AT4G25270,AT1G31920,AT3G49140  
AT5G13230,AT5G39680,AT5G16860  
AT1G71460  
Phypa1|26863  
AT5G52850  
Phypa1|34691,Phypa1|31016,Phypa1|37512,Phypa1|37499,Phypa1|36509,Phypa1|36063,Phypa1|39505,  
Phypa1|37440,Phypa1|38722,Phypa1|30707,Phypa1|28488  
AT4G20770,AT1G43980,AT1G23450,AT3G09040,AT2G02750  
AT5G13270,AT3G49170  
AT3G58590  
AT1G77150,AT1G77170  
AT5G55740,AT2G37310,AT1G03510,AT2G36980,AT5G08490  
Phypa1|36233  
AT1G26900,AT3G56550,AT3G62890,AT3G15930,AT1G31430,AT2G22410,AT3G04750,AT1G34160,AT5G43790,AT5  
G61800,AT5G08510,AT1G06145,AT1G33350,AT2G20540,AT5G56310,AT1G08070,AT2G42920,AT5G48910,AT2G45  
350,AT4G18840,AT1G10330,AT5G66520,AT4G38010,AT1G50270,AT2G29760,AT5G08310,AT2G02980,AT1G74630,  
AT3G29230,AT4G35130,AT1G13410,AT2G44880,AT4G22760,AT5G37570,AT5G19020,AT1G09220,AT3G05240,AT5  
G15300,AT4G37380,AT2G37320,AT2G34400,AT3G47530,AT5G59200,AT1G05750,AT4G14820,AT5G50990,AT3G28  
640,AT3G28660,AT5G06540,AT3G22690,AT5G40405,AT5G44230,AT1G59720,AT2G36730  
Phypa1|25075,Phypa1|27539  
AT1G68930,AT3G49710,AT3G02010,AT3G61170,AT4G37170,AT4G16835,AT1G56690,AT1G09410,AT4G02750,AT2  
G03880,AT5G65570,AT3G57430  
AT5G66500  
Phypa1|32200  
AT1G31790,AT1G77010,AT4G08210,AT3G18840,AT2G21090,AT1G62260,AT2G35030,AT1G53600,AT1G32415,AT3  
G21470  
AT3G18970,AT1G69350,AT2G04860,AT4G19220,AT1G64310,AT3G22150,AT2G03380,AT5G39350,AT3G01580,AT3  
G49740,AT4G31070,AT2G39620,AT4G04370,AT1G74600,AT1G06140,AT2G17210  
AT2G41080,AT4G14050,AT1G25360,AT2G22070,AT1G71420,AT4G33170,AT5G04780,AT5G52630,AT3G24000,AT4  
G14850  
AT4G18520  
AT1G17630,AT1G19720,AT4G01030,AT5G59600,AT1G20230,AT3G46790  
AT3G23330,AT3G14730,AT3G63370,AT4G21300  
AT3G51320  
AT2G15690,AT2G25580,AT4G32450,AT2G34370,AT1G29710,AT3G26630,AT1G04840,AT5G50390,AT1G28690,AT4  
G39530,AT4G16470,AT1G74400  
AT3G26540  
AT4G18750,AT3G03580,AT3G15130,AT1G15510  
AT4G14170,AT1G22830,AT1G71490,AT4G39952  
Phypa1|28986  
Phypa1|26311,Phypa1|24631  
Phypa1|28785  
AT2G07340 Phypa1|39553  
AT3G26580 Phypa1|12745,Phypa1|34749  
AT2G23940,AT4G30500 Phypa1|38813  
AT1G33265 Phypa1|33715  
AT1G67440,AT1G67460 Phypa1|30754,Phypa1|36329  
AT3G62580 Phypa1|39273  
Phypa1|24988,Phypa1|14763,Phypa1|27444  
AT1G05460 Phypa1|36943  
AT2G30880 Phypa1|30547,Phypa1|1010  
AT4G27590  
Phypa1|348  
Phypa1|33235,Phypa1|362,Phypa1|2234,Phypa1|1716  
AT1G06330,AT1G29100,AT3G48970,AT4G39700,AT4G08570,AT1G71050,AT1G22990,AT5G17450,AT4G35060,AT4  
G38580,AT5G66110  
AT2G18196  
AT1G66240,AT3G56240 Phypa1|37052  
Phypa1|1463,Phypa1|27831,Phypa1|25660  
AT4G16765,AT4G16770  
AT3G50210,AT3G49620,AT3G49630 Phypa1|39272  
AT1G80340,AT1G15550,AT1G80330,AT4G21690 Phypa1|26672,Phypa1|28027  
AT1G02400,AT1G47990,AT2G34555,AT1G30040,AT1G78440  
Phypa1|36564,Phypa1|27963,Phypa1|1943,Phypa1|622  
AT5G63590,AT5G08640,AT5G43935,AT5G63580,AT5G63600,AT5G63595,AT4G22880,AT4G22870  
AT1G52820,AT4G03070,AT1G52810,AT1G28030,AT1G52790,AT1G52800,AT1G15540,AT1G80320,AT4G03060,AT4  
G03050  
Phypa1|1928,Phypa1|25997,Phypa1|24945,Phypa1|26918,Phypa1|29413  
AT5G51810,AT4G25420,AT5G07200,AT1G60980,AT1G44090  
Phypa1|140,Phypa1|34590,Phypa1|583,Phypa1|30330,Phypa1|1913,Phypa1|28733,Phypa1|1451  
Phypa1|27835  
AT3G21420,AT1G17010,AT1G17020,AT4G25300,AT4G25310,AT1G78550,AT5G20550,AT5G20400,AT1G49390,AT5  
G54000  
Phypa1|30891  
AT1G03400,AT1G03410,AT1G06620,AT3G61400,AT1G06640,AT1G06650,AT2G25450,AT2G30830,AT2G30840,AT5  
G59540,AT5G59530,AT1G04380,AT1G04350,AT5G43450,AT5G43440,AT1G55290,AT3G13610,AT3G12900,AT5G12  
270,AT4G10490,AT4G10500,AT5G24530,AT2G06960,AT2G36690,AT3G60290,AT2G44800,AT5G07480  
Phypa1|37961  
AT3G46500,AT3G46480,AT3G46490,AT1G35190 Phypa1|34424,Phypa1|36521  
AT1G05010,AT1G62380,AT1G12010,AT1G77330,AT2G19590,AT4G21200,AT1G50960,AT3G47190,AT5G58660  
AT3G19000,AT3G19010 Phypa1|37887,Phypa1|37886,Phypa1|37888

Phypa1|161  
Phypa1|2510,Phypa1|35212,Phypa1|32779  
AT5G05600,AT3G11180,AT3G55970,AT2G38240  
Phypa1|13065  
Phypa1|1719  
Phypa1|8124  
Phypa1|28448,Phypa1|7629,Phypa1|37035,Phypa1|4927,Phypa1|19790,Phypa1|1436,Phypa1|28708,Phy  
pa1|153,Phypa1|29197,Phypa1|27668,Phypa1|2915,Phypa1|21215,Phypa1|26221,Phypa1|36726  
AT4G16330 Phypa1|24059  
AT3G51240  
AT4G23340,AT5G51310,AT1G14120,AT1G14130  
AT1G34350 Phypa1|26434  
AT2G41770,AT3G57420 Phypa1|26641,Phypa1|36334  
AT2G43760 Phypa1|30728,Phypa1|26317  
AT2G01410 Phypa1|32622,Phypa1|33571  
AT5G45990,AT3G13210,AT5G41770,AT3G51110 Phypa1|23859,Phypa1|31606  
AT5G53530,AT4G27690 Phypa1|39524,Phypa1|39199,Phypa1|17908  
AT2G21870 Phypa1|23739  
AT4G29080,AT2G22670,AT5G65670,AT1G04240,AT5G43700,AT3G23030,AT4G14560,AT4G14550,AT3G23050,AT1  
G04250,AT3G04730,AT1G80390,AT1G52830,AT3G15540,AT1G15580,AT1G51950,AT3G16500,AT5G25890,AT1G04  
550,AT2G33310,AT4G28640,AT1G04100,AT3G62100,AT2G46990,AT3G17600,AT2G01200,AT1G15050,AT4G32280  
Phypa1|36780,Phypa1|39253  
AT4G32760,AT3G08790,AT5G01760,AT2G38410,AT5G63640,AT1G21380,AT1G76970 Phypa1|24801  
Phypa1|26247  
AT4G08540,AT1G77890 Phypa1|39475  
AT5G17990 Phypa1|39230  
Phypa1|31387,Phypa1|31236  
Phypa1|35730  
AT1G28420,AT5G44180 Phypa1|4881  
AT4G12750  
Phypa1|37460  
AT2G19870 Phypa1|22793  
AT3G62370 Phypa1|1025,Phypa1|27449  
AT2G15860 Phypa1|14499,Phypa1|30862  
AT1G58766,AT1G59077,AT1G59453,AT1G17450 Phypa1|4729  
AT5G40890,AT3G27170,AT5G33280,AT5G49890 Phypa1|23730  
AT5G26240 Phypa1|39102,Phypa1|30118  
Phypa1|14533,Phypa1|35507,Phypa1|34737  
AT5G59960 Phypa1|37015,Phypa1|29140  
AT4G25690,AT4G25670,AT5G52550 Phypa1|34771  
AT1G62830  
AT4G29720 Phypa1|21158  
AT3G13682  
AT4G16310 Phypa1|25895  
AT3G10390 Phypa1|38585,Phypa1|39137  
AT1G74270,AT1G07070,AT1G41880,AT3G55750  
Phypa1|3587,Phypa1|23830,Phypa1|32755,Phypa1|2414,Phypa1|37028,Phypa1|23810  
AT3G09050 Phypa1|27341  
AT3G55005,AT3G55000 Phypa1|34136  
AT1G32480  
AT3G09810,AT5G03290 Phypa1|36866,Phypa1|37570,Phypa1|26965  
Phypa1|21568,Phypa1|30477  
AT4G35650 Phypa1|29035,Phypa1|27494,Phypa1|2875  
AT2G17130  
AT4G35260  
AT5G52980 Phypa1|24503  
AT5G66420 Phypa1|14573,Phypa1|30812,Phypa1|38210  
AT1G11930,AT4G26860 Phypa1|36800,Phypa1|23750  
AT4G01860 Phypa1|32795  
AT2G21690,AT3G08000 Phypa1|28720,Phypa1|27698,Phypa1|39774,Phypa1|30169  
AT1G58470  
AT5G62110  
AT3G07810  
Phypa1|25622  
Phypa1|25532  
Phypa1|856  
Phypa1|878  
AT3G13224 Phypa1|24972,Phypa1|24987,Phypa1|28442,Phypa1|24657  
AT2G33410,AT4G14300  
Phypa1|309,Phypa1|12594  
AT5G54580,AT2G37510,AT1G18630,AT4G13860  
AT5G47620  
AT5G04280,AT1G60650  
Phypa1|32206  
AT5G55550,AT4G26650  
AT4G13850,AT3G23830 Phypa1|1632,Phypa1|1631,Phypa1|34063,Phypa1|38563  
AT3G26420 Phypa1|27975  
AT4G36960 Phypa1|24599,Phypa1|30987  
Phypa1|25529  
AT5G06210,AT2G27330  
AT1G73530  
AT1G17640



AT2G16260 Phypa1|869,Phypa1|604  
AT4G22410,AT4G22350 Phypa1|940  
AT3G44330 Phypa1|24099  
Phypa1|17972  
AT1G10180 Phypa1|1762  
AT1G10385  
AT5G49830  
Phypa1|16,Phypa1|27274,Phypa1|30415,Phypa1|30204,Phypa1|29485,Phypa1|39458  
AT5G25260,AT5G25250,AT5G64870 Phypa1|26205  
AT1G32060 Phypa1|2432,Phypa1|33987,Phypa1|24064,Phypa1|4858  
AT5G57800 Phypa1|37963,Phypa1|24073  
Phypa1|38034  
AT1G02205,AT1G02190,AT2G37700 Phypa1|36196  
AT2G25740 Phypa1|1821,Phypa1|27237,Phypa1|29108,Phypa1|28712,Phypa1|16752,Phypa1|1802  
AT2G02590 Phypa1|1982  
AT5G16140,AT5G38290,AT5G19830,AT1G18440 Phypa1|37298,Phypa1|29207  
AT3G05880,AT3G05890,AT4G30660,AT2G24040,AT4G28088,AT4G30650 Phypa1|28947  
AT2G38905,AT1G57550 Phypa1|24391,Phypa1|36811,Phypa1|38739,Phypa1|36160  
AT1G49970 Phypa1|27060,Phypa1|30184  
AT1G09130 Phypa1|26911,Phypa1|25862  
AT5G40670 Phypa1|38682  
AT4G32360 Phypa1|39558  
AT2G38700,AT3G54250 Phypa1|23972,Phypa1|23964  
AT2G46220,AT1G16320,AT1G79510 Phypa1|225,Phypa1|29263  
AT1G04870 Phypa1|2739,Phypa1|27913  
AT4G29510,AT2G19670 Phypa1|2597,Phypa1|2664  
Phypa1|6325  
AT3G12270 Phypa1|2817  
Phypa1|9067  
AT3G20020 Phypa1|37400  
AT2G39090 Phypa1|24849  
Phypa1|5308,Phypa1|38680,Phypa1|2032,Phypa1|29120  
AT2G44020,AT4G02990 Phypa1|32509,Phypa1|989  
AT4G14605 Phypa1|29496,Phypa1|36921  
AT4G38160  
Phypa1|5025  
AT5G54180  
Phypa1|173  
AT5G55000  
Phypa1|26410,Phypa1|29654,Phypa1|2302,Phypa1|2300,Phypa1|33206,Phypa1|4610,Phypa1|3055,Phyp  
a1|37073  
AT5G06660,AT3G12030 Phypa1|37725  
AT1G03160 Phypa1|37487,Phypa1|29761,Phypa1|22081,Phypa1|21743  
AT1G09010 Phypa1|27448,Phypa1|27734  
AT2G38860,AT3G54600 Phypa1|20534,Phypa1|22079  
AT3G02720 Phypa1|39140  
AT5G11260,AT3G17609 Phypa1|27020,Phypa1|38852  
AT3G13490 Phypa1|39561  
AT3G11710Phypa1|38958,Phypa1|28209  
AT1G02860,AT2G38920 Phypa1|36541,Phypa1|27515,Phypa1|4038  
AT5G11490Phypa1|37221  
AT4G11380,AT4G23460 Phypa1|23790,Phypa1|39516,Phypa1|39610  
Phypa1|29161  
AT1G55730,AT1G55720,AT3G13320 Phypa1|35458,Phypa1|38328,Phypa1|37753,Phypa1|26990  
AT2G38170,AT3G51860,AT5G01490 Phypa1|10518  
AT1G55910,AT5G59520 Phypa1|29191,Phypa1|25162  
Phypa1|13031,Phypa1|37315  
AT3G02370,AT3G57360 Phypa1|35161,Phypa1|27379  
Phypa1|39504,Phypa1|38264  
AT2G32550 Phypa1|4074  
AT3G20800,AT5G12980  
AT1G22980,AT1G22970,AT1G71150 Phypa1|27081  
Phypa1|28409  
Phypa1|31160  
AT4G33010,AT2G26080 Phypa1|38274,Phypa1|36111,Phypa1|35163  
AT5G26820 Phypa1|29080,Phypa1|29082,Phypa1|29114  
AT5G24020 Phypa1|38418,Phypa1|38651  
Phypa1|23447,Phypa1|22810  
AT1G10150,AT1G59510,AT3G49790 Phypa1|25508,Phypa1|27003  
Phypa1|21310  
AT1G64970 Phypa1|38424  
AT1G32150,AT2G35530,AT4G36730  
Phypa1|1328  
AT2G46270,AT4G01120 Phypa1|1329  
Phypa1|1332  
AT3G44530 Phypa1|38616,Phypa1|37558  
AT1G15130 Phypa1|39642,Phypa1|3045  
AT4G19985 Phypa1|18415,Phypa1|10183  
AT3G13200 Phypa1|15087  
AT1G09230 Phypa1|32867,Phypa1|27769  
AT2G36885 Phypa1|31072  
AT3G62940 Phypa1|38823

AT4G29890 Phypa1|31093,Phypa1|24617  
AT3G46560 Phypa1|2518,Phypa1|24209  
AT5G02120 Phypa1|25700,Phypa1|24908  
AT1G21610,AT1G77310 Phypa1|35334,Phypa1|33990  
AT5G03406,AT3G46100 Phypa1|22753,Phypa1|31324  
Phypa1|30559,Phypa1|25935  
AT3G29320 Phypa1|8675,Phypa1|23982,Phypa1|27166  
Phypa1|36288  
AT3G46970  
Phypa1|34429  
AT2G37090,AT1G27600 Phypa1|2640,Phypa1|35921  
AT1G23010,AT1G71040 Phypa1|30988,Phypa1|25999  
AT2G19270 Phypa1|18799  
Phypa1|30898,Phypa1|3097  
AT3G06850 Phypa1|27998  
Phypa1|3009  
AT3G52200 Phypa1|36873  
AT3G13930,AT1G54220 Phypa1|26967  
Phypa1|11833  
AT3G11620Phypa1|36547  
AT4G36630 Phypa1|26279  
AT2G41070,AT3G56850,AT3G44460 Phypa1|26233  
AT1G51420,AT2G35840,AT3G52340,AT3G54270  
Phypa1|18810,Phypa1|39200,Phypa1|36622,Phypa1|37348,Phypa1|36147  
AT5G59400 Phypa1|34133,Phypa1|2027  
AT3G59810,AT2G43810 Phypa1|31979,Phypa1|39203  
AT3G56150,AT3G22860 Phypa1|905,Phypa1|39117,Phypa1|38661,Phypa1|4012  
AT2G42380,AT3G58120  
Phypa1|33140,Phypa1|31925,Phypa1|11367,Phypa1|35198,Phypa1|32103,Phypa1|32567,Phypa1|3413  
AT4G08960 Phypa1|27674,Phypa1|29202  
AT5G11430,AT5G25520,AT2G25640 Phypa1|17035  
AT5G09410,AT5G64220,AT2G22300 Phypa1|801,Phypa1|1759  
AT4G16150,AT3G16940,AT1G67310 Phypa1|7033  
AT5G13400 Phypa1|26817  
AT1G22540,AT1G72140,AT1G72130,AT1G22550,AT1G22570,AT1G72120,AT3G01350,AT5G14940,AT3G54450  
Phypa1|14157  
Phypa1|28602,Phypa1|23967,Phypa1|38770  
AT1G12110,AT2G26690,AT3G21670 Phypa1|37227,Phypa1|39550  
AT2G02020,AT1G62200,AT2G02040  
AT5G46050,AT5G46040,AT2G40460  
Phypa1|27776,Phypa1|27722,Phypa1|25039,Phypa1|29394,Phypa1|29823,Phypa1|19018,Phypa1|39674,  
Phypa1|2506  
AT3G45710,AT3G45700,AT3G45690,AT3G45680,AT3G45720,AT3G45660,AT3G45650,AT5G62680,AT3G47960,AT1  
G18880,AT1G27080,AT1G69870,AT1G69860,AT5G28470,AT1G52190,AT3G16180,AT5G11570  
AT1G68570 Phypa1|30524  
AT3G54140,AT5G01180 Phypa1|27746  
AT2G38100  
Phypa1|30664  
AT5G19640,AT1G32450,AT4G21680  
AT1G69850,AT1G27040,AT5G62730,AT3G25280,AT3G25260,AT1G59740,AT1G33440  
Phypa1|38742,Phypa1|23942  
Phypa1|33209,Phypa1|36738,Phypa1|24799  
Phypa1|14158  
AT2G37900,AT3G53960  
AT5G61330 Phypa1|15744  
AT4G15410,AT4G22150,AT4G04210 Phypa1|617,Phypa1|27270  
AT3G21660 Phypa1|13090  
AT2G13290,AT3G01620,AT5G14480,AT3G27540,AT3G26445,AT1G12990,AT1G67880  
Phypa1|25189,Phypa1|26125  
AT2G38880,AT3G53340,AT2G37060  
AT4G14540,AT5G47640 Phypa1|1200,Phypa1|25410  
AT5G47670,AT1G21970  
Phypa1|16833  
Phypa1|2326  
AT2G13570  
Phypa1|19028,Phypa1|1580  
AT1G09030,AT2G47810 Phypa1|2327  
AT5G17280 Phypa1|8520  
AT1G79040 Phypa1|24131,Phypa1|32957,Phypa1|32956,Phypa1|32658  
AT3G43930,AT2G26270 Phypa1|8093,Phypa1|24997  
AT2G44160,AT3G59970 Phypa1|32383,Phypa1|39779  
AT2G20770,AT1G52920,AT5G65280 Phypa1|25712,Phypa1|37636,Phypa1|19171  
AT1G71920,AT5G10330 Phypa1|31234,Phypa1|31100,Phypa1|30499,Phypa1|28661  
AT5G24330,AT5G09790 Phypa1|39691,Phypa1|37629  
AT3G12890,AT5G59990 Phypa1|33314,Phypa1|34065,Phypa1|31670  
AT5G45330,AT4G19360,AT1G26110 Phypa1|32486,Phypa1|34591,Phypa1|32485,Phypa1|11523  
AT2G31300,AT2G30910 Phypa1|38285,Phypa1|32043  
AT1G16520,AT1G56080  
AT4G15545  
Phypa1|27226,Phypa1|23868,Phypa1|35837,Phypa1|39009,Phypa1|35810,Phypa1|25268,Phypa1|27124,  
Phypa1|17314  
Phypa1|1621

AT5G13680 Phypa1|38487  
AT3G01510 Phypa1|30190  
AT2G34260 Phypa1|1959  
AT2G45860 Phypa1|20452  
AT5G02970,AT3G09690 Phypa1|38447,Phypa1|78,Phypa1|28160  
Phypa1|679,Phypa1|232  
Phypa1|863,Phypa1|2943,Phypa1|28357,Phypa1|37723,Phypa1|24520,Phypa1|38142,Phypa1|1288  
AT1G14687,AT5G42780,AT1G75240,AT2G18350,AT3G50890,AT5G39760,AT3G28920,AT5G15210,AT5G60480,AT1  
G69600,AT5G65410,AT4G24660  
Phypa1|876  
AT2G02540,AT1G14440  
Phypa1|6635  
Phypa1|24665  
AT1G74660  
AT3G28917  
Phypa1|35067,Phypa1|4711  
Phypa1|26203  
AT5G08141,AT5G60830,AT1G59530,AT5G38800,AT3G30530,AT5G15830,AT2G04038,AT1G13600,AT1G68880  
Phypa1|26763  
AT5G55470 Phypa1|21160  
AT5G27150,AT3G05030,AT3G06370  
Phypa1|37091,Phypa1|37437,Phypa1|2945,Phypa1|37599,Phypa1|25644  
AT3G21720 Phypa1|28113,Phypa1|37257  
Phypa1|23104  
AT1G32550 Phypa1|27423  
AT5G13730  
AT1G08540 Phypa1|38474,Phypa1|32241,Phypa1|24700,Phypa1|36251,Phypa1|31121  
AT2G36990 Phypa1|21906,Phypa1|22953,Phypa1|22271,Phypa1|11290  
AT3G53920  
AT1G64860 Phypa1|33950  
AT1G26460 Phypa1|6933  
AT2G04660 Phypa1|36305  
AT5G17440,AT3G03340 Phypa1|27209,Phypa1|30530  
AT5G13780 Phypa1|25156,Phypa1|37924  
AT1G78915 Phypa1|27342  
AT2G41460 Phypa1|27934  
Phypa1|8498,Phypa1|23101  
Phypa1|11348  
AT5G03470,AT3G09880,AT3G54930  
Phypa1|27435,Phypa1|33669,Phypa1|28604,Phypa1|36338,Phypa1|38839,Phypa1|36849,Phypa1|30182  
AT1G13460,AT3G26020,AT3G21650,AT4G15415,AT3G26030  
AT5G25510  
AT1G07970 Phypa1|33777  
AT3G45770 Phypa1|25387  
Phypa1|34343,Phypa1|32186,Phypa1|32118,Phypa1|37431,Phypa1|21031  
AT4G08810,AT2G04280,AT4G12700 Phypa1|26070  
AT2G04550 Phypa1|728,Phypa1|23843  
AT1G14450,AT2G02510 Phypa1|27086,Phypa1|28900  
AT2G35900 Phypa1|33381  
AT2G44360 Phypa1|33195  
AT5G47190,AT4G17560,AT1G24240,AT4G11630,AT5G11750 Phypa1|32729,Phypa1|4474,Phypa1|31935  
AT4G02560 Phypa1|35348  
AT1G27385 Phypa1|2172,Phypa1|2171  
AT4G13550 Phypa1|30187  
AT2G01755 Phypa1|2342  
AT5G67540,AT3G49880 Phypa1|25153,Phypa1|30569  
AT3G63290 Phypa1|24926,Phypa1|24913  
AT4G14210 Phypa1|30298  
AT1G72560 Phypa1|27628  
AT1G61580,AT1G43170 Phypa1|2472,Phypa1|37368,Phypa1|36822,Phypa1|39598  
AT5G25560,AT5G22920,AT5G18650,AT3G62970  
Phypa1|26149,Phypa1|38046,Phypa1|29529,Phypa1|26288,Phypa1|28321  
AT2G40410,AT3G56170 Phypa1|32270,Phypa1|7447  
AT1G10510 Phypa1|26753  
AT1G69540,AT1G18750,AT2G03060,AT1G22130,AT1G77980,AT1G77950  
Phypa1|29943,Phypa1|26735,Phypa1|26405,Phypa1|23683,Phypa1|37412,Phypa1|36930,Phypa1|14875,  
Phypa1|36341,Phypa1|29641,Phypa1|33857,Phypa1|38193,Phypa1|24157,Phypa1|6981,Phypa1|29942  
AT1G18480 Phypa1|38907  
AT3G52155 Phypa1|684  
AT2G37200,AT2G28370,AT3G23200,AT3G53850,AT5G02060,AT3G50810,AT4G37235,AT1G49405  
Phypa1|25022,Phypa1|2545,Phypa1|26020,Phypa1|759  
AT3G47490  
Phypa1|223  
AT1G18680 Phypa1|38312  
AT5G09210,AT5G08550 Phypa1|38888  
AT3G28030 Phypa1|6606  
AT5G52910 Phypa1|13570  
AT3G27660,AT5G40420,AT3G01570,AT5G07550,AT5G07560,AT5G07520,AT5G07510,AT5G07600,AT5G51210,AT4  
G25140,AT2G25890,AT5G61610,AT1G48990,AT3G18570 Phypa1|5659,Phypa1|10824,Phypa1|1230  
AT3G48150 Phypa1|27038  
AT1G77730 Phypa1|9712,Phypa1|7510,Phypa1|5318  
AT4G22540,AT4G12460

Phypa1|26604,Phypa1|28090,Phypa1|24862,Phypa1|29549,Phypa1|25264  
AT4G08180,AT2G31020 Phypa1|5319,Phypa1|38105,Phypa1|2681,Phypa1|2611  
AT1G13170  
AT2G31035,AT2G31030  
AT3G25160 Phypa1|30164  
AT4G38790,AT2G21190,AT1G19970,AT1G75760 Phypa1|39729,Phypa1|39285,Phypa1|39514  
AT2G21960 Phypa1|33740  
AT1G37010,AT5G06680 Phypa1|39589,Phypa1|32727  
AT2G26200 Phypa1|21350,Phypa1|29177  
AT5G54240,AT4G27350 Phypa1|645  
AT5G15640 Phypa1|37089  
AT5G26200,AT1G72820 Phypa1|36445,Phypa1|32695  
AT2G01730 Phypa1|27778  
AT1G61010 Phypa1|36210,Phypa1|38790  
AT3G63170 Phypa1|28138  
AT2G26310 Phypa1|35527  
AT1G28320 Phypa1|34564  
Phypa1|22084  
AT2G21550,AT4G34570,AT2G16370 Phypa1|25733  
AT1G48690,AT5G13320,AT1G23160,AT1G48670,AT1G48660,AT5G51470,AT5G13360,AT5G13370,AT5G13380,AT5  
G13350,AT4G27260,AT5G54510,AT2G14960,AT1G59500,AT4G37390,AT2G23170,AT2G47750,AT1G28130  
Phypa1|39588  
AT2G46370,AT4G03400 Phypa1|23847  
AT3G23380,AT1G04450,AT2G33460,AT1G03982,AT2G20430,AT4G28556,AT4G04900 Phypa1|8027  
AT4G31210 Phypa1|23236  
Phypa1|16102,Phypa1|28124  
AT3G22590 Phypa1|38255  
AT3G13230 Phypa1|29193  
AT2G27350 Phypa1|29907  
AT2G31090 Phypa1|36207,Phypa1|38238,Phypa1|25422  
AT1G73460,AT1G73450 Phypa1|36503  
Phypa1|29920  
AT2G40120  
AT3G17750 Phypa1|38065  
Phypa1|7348  
Phypa1|23158  
AT1G60730,AT1G60690,AT1G60710,AT1G60680,AT1G10810  
Phypa1|17145,Phypa1|24021,Phypa1|36135,Phypa1|34594  
Phypa1|22030,Phypa1|30432,Phypa1|30907  
Phypa1|31478,Phypa1|30466  
Phypa1|31472,Phypa1|30035  
Phypa1|22934  
Phypa1|37386,Phypa1|37917  
Phypa1|31488  
Phypa1|29995  
AT4G29520 Phypa1|24951  
AT1G32230,AT2G35510,AT3G47720,AT5G62520,AT1G70440,AT1G23550  
Phypa1|29085,Phypa1|170,Phypa1|32301  
AT5G19590,AT1G02816,AT4G02370,AT1G02813,AT4G02360 Phypa1|36021  
AT4G02600,AT4G24250,AT2G44110 Phypa1|1818,Phypa1|38086,Phypa1|29,Phypa1|36211,Phypa1|37005  
AT2G17480,AT5G65970,AT2G17430,AT1G42560,AT2G33670,AT1G11310,AT1G61560,AT2G39200,AT3G45290  
AT1G11000  
AT5G53760,AT1G26700 Phypa1|1394,Phypa1|457,Phypa1|39,Phypa1|26548,Phypa1|453,Phypa1|941  
AT3G06690,AT1G06290,AT1G06310 Phypa1|38497,Phypa1|39155  
AT5G65110Phypa1|31879,Phypa1|22263  
AT4G36720,AT1G74520,AT5G62490,AT1G69700,AT2G42820,AT5G50720,AT4G24960  
Phypa1|6007,Phypa1|35733,Phypa1|24068,Phypa1|39707,Phypa1|39565,Phypa1|36649  
Phypa1|36401,Phypa1|35209  
AT5G17310,AT3G03250  
Phypa1|26249  
AT4G32580,AT4G04950 Phypa1|38600,Phypa1|39053,Phypa1|26991  
AT3G15660 Phypa1|24307,Phypa1|24683  
Phypa1|29041,Phypa1|30540  
AT3G54900  
AT2G38270 Phypa1|30791  
AT2G19080 Phypa1|24218,Phypa1|39473  
AT5G51410 Phypa1|35013,Phypa1|25339  
AT5G53570,AT3G49350,AT5G24390,AT5G41940 Phypa1|25849,Phypa1|1401  
AT5G27010,AT5G06350,AT4G04680 Phypa1|4021  
Phypa1|31123  
Phypa1|30908  
Phypa1|31053  
AT3G22200 Phypa1|38018,Phypa1|2646  
AT3G19870 Phypa1|36027  
AT2G32810 Phypa1|36019,Phypa1|37522  
AT2G28470,AT3G53070,AT3G53050,AT3G53080,AT2G04060,AT1G31740,AT5G20710,AT1G77410,AT5G63800,AT4  
G35010,AT2G16730,AT4G38590,AT5G63810,AT4G36360,AT1G45130,AT3G13750,AT5G56870,AT4G26140,AT3G52  
840 Phypa1|28787,Phypa1|25400  
AT5G34940,AT5G07830,AT5G61250 Phypa1|15545,Phypa1|27797,Phypa1|12934,Phypa1|23883  
AT1G43640,AT1G76900,AT1G25280  
AT1G53320 Phypa1|10135,Phypa1|2207  
AT2G18280,AT1G47270 Phypa1|39379,Phypa1|39380,Phypa1|2773,Phypa1|37353,Phypa1|29044

AT1G61940,AT2G47900,AT5G18680,AT3G06380  
AT4G30330,AT2G18740 Phypa1|23871,Phypa1|24214,Phypa1|25471  
AT5G47030 Phypa1|24654,Phypa1|254,Phypa1|24629  
AT2G38560 Phypa1|37397,Phypa1|27661,Phypa1|25810  
AT2G32380,AT1G05210,AT1G05220 Phypa1|285  
Phypa1|15759  
AT3G61320,AT2G45870 Phypa1|36489,Phypa1|38243  
Phypa1|35078,Phypa1|6528  
Phypa1|1027,Phypa1|26340,Phypa1|38402,Phypa1|26143,Phypa1|26564,Phypa1|1032,Phypa1|30705  
AT4G05210,AT4G21220 Phypa1|14682,Phypa1|33785  
AT3G52220 Phypa1|26522  
AT3G15460,AT1G52930 Phypa1|37055  
AT1G09340 Phypa1|5544,Phypa1|38741  
AT4G00585 Phypa1|36801  
AT3G09150 Phypa1|24592  
AT1G15120,AT2G01090 Phypa1|382,Phypa1|24637  
AT1G77670 Phypa1|13631,Phypa1|26620  
Phypa1|31294,Phypa1|20542,Phypa1|22992,Phypa1|31327,Phypa1|21363,Phypa1|21163  
Phypa1|38258  
AT3G59520 Phypa1|15019,Phypa1|36123  
AT5G39940 Phypa1|27073  
AT4G36440 Phypa1|33485,Phypa1|33392  
AT5G51720 Phypa1|338,Phypa1|20350  
AT1G24120,AT1G59980 Phypa1|10249,Phypa1|32705  
AT1G68370 Phypa1|36804,Phypa1|36030,Phypa1|38675  
AT3G05560,AT5G27770,AT1G02830  
Phypa1|25968,Phypa1|7389,Phypa1|30788,Phypa1|25299,Phypa1|25330,Phypa1|313,Phypa1|37485  
AT1G20110Phypa1|25841  
AT4G34670,AT3G04840  
Phypa1|34787,Phypa1|32778,Phypa1|15252,Phypa1|38292,Phypa1|36949,Phypa1|38812,Phypa1|39243,  
Phypa1|2718  
AT3G11780,AT5G06480,AT2G16005,AT3G44100 Phypa1|26749,Phypa1|27845  
Phypa1|24549  
AT1G11260,AT4G21480,AT3G19940,AT1G50310,AT5G23270,AT3G19930  
AT2G43330  
AT1G34580  
Phypa1|22844,Phypa1|20540  
AT3G03090,AT5G17010,AT5G59250 Phypa1|26058,Phypa1|1924  
AT1G08930,AT1G08920,AT3G05400,AT5G27360,AT5G27350,AT3G05160,AT3G05165,AT1G54730,AT3G20460,AT2  
G48020,AT5G18840,AT3G05150,AT4G04760,AT4G04750  
AT3G05960,AT5G26250,AT1G07340  
AT1G75220,AT1G19450 Phypa1|30695,Phypa1|37013,Phypa1|30150  
AT3G05155  
Phypa1|38195,Phypa1|4211,Phypa1|2619  
AT2G18480,AT4G36670  
AT1G05030 Phypa1|16171  
AT5G16150 Phypa1|35936,Phypa1|37199  
AT1G54720,AT1G08900,AT1G08890  
AT2G16130,AT2G16120,AT3G18830  
AT2G20780 Phypa1|978  
AT5G61520  
AT1G77210,AT4G02050  
AT1G67300,AT1G79820 Phypa1|37001,Phypa1|29235  
AT1G30220,AT4G16480,AT2G35740 Phypa1|26982,Phypa1|22579  
AT5G26340 Phypa1|35771,Phypa1|24183  
AT3G27160,AT5G63300 Phypa1|24026,Phypa1|32391,Phypa1|3031,Phypa1|32006  
AT2G41945 Phypa1|9183  
AT2G25670,AT4G32610 Phypa1|34011,Phypa1|23920  
AT3G45300 Phypa1|29360  
Phypa1|30016,Phypa1|3007  
Phypa1|22620,Phypa1|21975,Phypa1|20591  
Phypa1|22513,Phypa1|3098,Phypa1|31119,Phypa1|25418  
AT2G14520,AT4G33700  
AT1G47330  
AT5G52790 Phypa1|28864  
Phypa1|25103,Phypa1|3058  
AT4G14230,AT4G14240,AT1G03270  
Phypa1|1819,Phypa1|25207,Phypa1|4151,Phypa1|38019,Phypa1|16032,Phypa1|11045  
Phypa1|33536,Phypa1|16031  
AT4G38490 Phypa1|34945  
AT5G27290,AT1G54680 Phypa1|1962  
AT2G35450 Phypa1|38157  
AT3G56430,AT2G40800 Phypa1|1046,Phypa1|2283  
Phypa1|25579  
AT3G19900 Phypa1|28257  
AT5G34540 Phypa1|17367,Phypa1|24892  
Phypa1|14  
Phypa1|25390  
AT4G03680  
Phypa1|27688  
Phypa1|25791  
Phypa1|24544,Phypa1|28339

Phypa1|29454  
Phypa1|26168  
Phypa1|25152  
Phypa1|27129  
AT4G07800  
Phypa1|25436  
Phypa1|27364  
Phypa1|24983  
AT3G42320,AT5G28780,AT3G51700,AT3G51690,AT1G64410,AT1G52960,AT3G43350,AT3G42340,AT4G03690,AT3G30560,AT3G13250,AT3G42100,AT1G35940,AT5G32070,AT3G31980,AT5G37110,AT2G05080,AT4G03916,AT3G30420,AT1G54430  
AT3G30730,AT3G43330  
AT5G11810Phypa1|38464,Phypa1|5676  
AT2G33320,AT1G04540,AT2G13350,AT3G04360,AT4G01200 Phypa1|32511,Phypa1|34914  
AT1G20810 Phypa1|16780  
Phypa1|36438,Phypa1|12737,Phypa1|26832,Phypa1|37123,Phypa1|18573  
AT1G01610,AT4G00400,AT2G38110 Phypa1|37232,Phypa1|2519  
AT1G06520,AT4G01950,AT1G02390,AT5G06090,AT3G11430,AT3G11325  
AT2G23060,AT4G37580,AT5G67430,AT2G30090 Phypa1|38322,Phypa1|30080  
AT1G30960 Phypa1|88  
AT1G70400,AT1G60170 Phypa1|2879  
Phypa1|10604,Phypa1|34316,Phypa1|31351  
AT2G47830 Phypa1|33618,Phypa1|39457,Phypa1|21383,Phypa1|31288  
AT4G03020 Phypa1|36646,Phypa1|26305,Phypa1|30165  
AT3G15880,AT1G15750,AT1G80490,AT2G25420,AT5G27030,AT3G16830 Phypa1|29962,Phypa1|27441  
Phypa1|20252  
Phypa1|21143  
AT5G03760,AT5G22740 Phypa1|36363,Phypa1|36700,Phypa1|38492  
AT5G16190,AT1G24070,AT4G13410,AT4G16590,AT3G56000,AT1G23480,AT2G35650  
AT3G07330 Phypa1|36155,Phypa1|30318,Phypa1|37409,Phypa1|27243,Phypa1|39385,Phypa1|4895,Phypa1|34269  
AT4G07960,AT2G24630,AT4G31590  
AT3G28180  
AT1G78820,AT1G78830,AT1G78850,AT1G78860 Phypa1|34253  
AT4G34150 Phypa1|33386,Phypa1|32277  
AT1G60490 Phypa1|36621  
AT1G77550 Phypa1|36082  
AT2G35500 Phypa1|32786  
AT2G17972 Phypa1|33745  
AT1G09450 Phypa1|29103  
AT1G22750 Phypa1|15031,Phypa1|3727  
AT5G14850 Phypa1|932  
AT3G05870 Phypa1|2626  
AT5G26640 Phypa1|28423  
AT2G31260 Phypa1|29369,Phypa1|26487  
AT5G59180 Phypa1|32045,Phypa1|35127  
AT3G05100 Phypa1|27278  
AT2G14110Phypa1|2560  
AT4G13500,AT2G05310 Phypa1|28543  
AT2G21470 Phypa1|28871,Phypa1|8710  
Phypa1|15588  
AT3G14150,AT3G14130  
Phypa1|33723  
AT3G14420,AT3G14415,AT4G18360 Phypa1|38962,Phypa1|31791,Phypa1|32425,Phypa1|24062  
AT4G12760 Phypa1|25280  
AT5G25170,AT1G80690,AT2G25190,AT1G47740,AT4G17486,AT5G47310 Phypa1|2107,Phypa1|38540  
AT1G03360 Phypa1|32988  
AT4G11960,AT4G22890 Phypa1|16379,Phypa1|28244  
AT5G19840 Phypa1|24676  
AT2G25660 Phypa1|37809  
AT4G10050 Phypa1|121  
AT1G12000,AT4G04040 Phypa1|23976,Phypa1|39204,Phypa1|37167  
AT4G08876  
AT1G20950,AT1G76550 Phypa1|2553,Phypa1|39217  
Phypa1|25908,Phypa1|29316  
AT3G20330 Phypa1|30775  
AT1G70150 Phypa1|37941  
AT5G20090 Phypa1|25635  
AT3G03100 Phypa1|25060  
AT1G23360 Phypa1|28579  
AT3G03570,AT4G40050 Phypa1|25233,Phypa1|28548,Phypa1|30628,Phypa1|25637,Phypa1|29913  
AT1G53500,AT3G14790,AT1G78570,AT1G63000  
Phypa1|29545,Phypa1|28856,Phypa1|27214,Phypa1|28846,Phypa1|19118,Phypa1|24070  
Phypa1|27680,Phypa1|26448  
AT5G08100,AT3G16150 Phypa1|2527,Phypa1|24779,Phypa1|39082,Phypa1|37615  
AT4G25030,AT5G45410 Phypa1|2280,Phypa1|2282,Phypa1|158  
AT1G55280 Phypa1|31593  
Phypa1|35169,Phypa1|37619,Phypa1|25386  
AT5G49980,AT4G24390  
Phypa1|23714,Phypa1|36455,Phypa1|37551,Phypa1|37263  
AT2G39940  
Phypa1|1732

AT1G12820,AT3G26810,AT3G62980,AT4G03190  
     Phypa1|35940,Phypa1|31802  
     Phypa1|36515,Phypa1|1806,Phypa1|37290  
 AT3G02920,AT2G24490    Phypa1|38022  
 AT1G78660,AT1G78680,AT1G78670    Phypa1|145,Phypa1|28295,Phypa1|33573,Phypa1|1958  
     Phypa1|31381  
     Phypa1|23681,Phypa1|38215  
 AT5G40390,AT4G01970  
 AT1G55740,AT3G57520  
 AT4G01265  
 AT5G20250  
 AT3G24495    Phypa1|11193  
     Phypa1|1673  
     Phypa1|13129  
 AT3G20475  
     Phypa1|3749  
     Phypa1|31240  
     Phypa1|28347  
 AT4G02070  
 AT4G25540    Phypa1|36293  
 AT1G60850,AT1G60620    Phypa1|23963  
 AT1G67140  
     Phypa1|16189  
     Phypa1|33928  
     Phypa1|3006,Phypa1|30940  
     Phypa1|38580  
 AT4G34030  
 AT3G12110,AT2G37620,AT3G53750,AT5G59370,AT3G46520  
     Phypa1|23988,Phypa1|39301,Phypa1|24096,Phypa1|39668,Phypa1|39608,Phypa1|37983,Phypa1|39655,  
 Phypa1|35597  
 AT3G33520    Phypa1|26584  
 AT5G09810  
 AT1G18450    Phypa1|37730,Phypa1|2679  
 AT1G13180    Phypa1|27651,Phypa1|23875  
 AT2G42090  
 AT3G27000    Phypa1|36134  
 AT2G42170,AT2G42100  
 AT1G73910  
 AT3G60830    Phypa1|24522,Phypa1|2948  
 AT5G56180  
 AT1G49240,AT3G18780  
 AT4G18300,AT2G34970,AT3G02270    Phypa1|1764  
 AT1G49430  
 AT4G23850,AT4G11030,AT1G64400    Phypa1|36491,Phypa1|27632,Phypa1|37657,Phypa1|27711  
 AT2G47240  
     Phypa1|2539,Phypa1|28760  
 AT3G05970,AT5G27600    Phypa1|6815,Phypa1|39696,Phypa1|36045  
 AT2G04350  
 AT1G77590    Phypa1|39759  
 AT3G12290    Phypa1|26927,Phypa1|30075,Phypa1|25642,Phypa1|27993  
     Phypa1|29661,Phypa1|27782  
     Phypa1|31371  
 AT4G00600,AT4G00620,AT2G38660  
 AT3G56510    Phypa1|24230  
 AT4G06634    Phypa1|1505  
 AT5G61450    Phypa1|37046,Phypa1|36372,Phypa1|32296  
 AT2G33040    Phypa1|25216,Phypa1|30371,Phypa1|29624,Phypa1|2992  
 AT2G37550,AT3G53710    Phypa1|34131,Phypa1|38598  
 AT1G09730,AT4G33620    Phypa1|35407  
 AT1G10570,AT1G60220  
     Phypa1|16010,Phypa1|34606,Phypa1|33602,Phypa1|11086  
 AT2G22730,AT5G65687,AT5G64500    Phypa1|5743,Phypa1|33117  
     Phypa1|6304,Phypa1|9510,Phypa1|4135,Phypa1|3710,Phypa1|20208  
 AT5G19650    Phypa1|18616  
 AT5G22240    Phypa1|14465  
 AT5G46850    Phypa1|32910  
 AT1G18640    Phypa1|27737  
     Phypa1|27247  
 AT4G01995    Phypa1|25119  
 AT1G64680    Phypa1|2427  
     Phypa1|9174,Phypa1|26539  
 AT1G03055  
 AT3G24570    Phypa1|25341  
 AT4G10330    Phypa1|15954,Phypa1|17001  
 AT1G08640    Phypa1|644  
 AT5G67170    Phypa1|28933,Phypa1|33495  
 AT1G11890,AT5G52270    Phypa1|38607,Phypa1|38768  
 AT3G18870  
 AT2G36000  
 AT2G03050,AT2G34620    Phypa1|1485,Phypa1|27043  
     Phypa1|11082  
 AT5G50460,AT4G24920,AT3G48570    Phypa1|24466,Phypa1|37074,Phypa1|13938,Phypa1|39660

AT4G34140 Phypa1|35716  
 AT2G02410 Phypa1|600,Phypa1|25396  
 AT1G79260 Phypa1|39237  
 AT5G58130 Phypa1|32559  
 AT1G52730,AT3G15610,AT1G15470 Phypa1|34767,Phypa1|38363,Phypa1|22535  
 AT1G21440,AT1G77060,AT2G43180 Phypa1|29307  
 AT4G15093 Phypa1|38101  
 Phypa1|22706  
 Phypa1|31347  
 Phypa1|31114  
 Phypa1|23512  
 Phypa1|30726  
 AT2G38400,AT3G08860  
 Phypa1|31431  
 AT4G39660 Phypa1|36314  
 AT5G19480,AT5G12230 Phypa1|32242,Phypa1|31643,Phypa1|35359,Phypa1|32273  
 AT5G05710,AT2G29700 Phypa1|37543,Phypa1|33819,Phypa1|36905  
 AT4G24930 Phypa1|11964  
 AT1G74060,AT1G74050,AT1G18540 Phypa1|27929,Phypa1|27948,Phypa1|23826,Phypa1|36281  
 AT5G03415,AT5G02470 Phypa1|25863,Phypa1|26905,Phypa1|37665  
 AT5G64180 Phypa1|37810  
 AT3G09800,AT4G08520,AT1G60970 Phypa1|36605,Phypa1|36060,Phypa1|38194,Phypa1|26867  
 AT1G21720,AT1G77440 Phypa1|33972,Phypa1|34016,Phypa1|25636  
 AT2G01120Phypa1|38943  
 AT1G27760 Phypa1|15972,Phypa1|38277,Phypa1|33906  
 AT3G50340,AT5G67020,AT2G22790 Phypa1|37140,Phypa1|38064,Phypa1|36146  
 AT1G10520 Phypa1|37593  
 AT5G19910 Phypa1|7270  
 Phypa1|731  
 AT5G61540 Phypa1|26402  
 AT3G07590,AT4G02840 Phypa1|36380,Phypa1|37113,Phypa1|31196  
 AT2G25830 Phypa1|7975  
 AT2G31660,AT3G59020 Phypa1|29617,Phypa1|37589  
 AT1G20340,AT1G76100 Phypa1|2424,Phypa1|38380,Phypa1|35027  
 Phypa1|3899  
 AT3G46940  
 Phypa1|22905,Phypa1|1608  
 AT3G60100,AT2G44350 Phypa1|36378,Phypa1|28506  
 AT2G11270Phypa1|8898  
 AT5G47080,AT4G17640,AT3G60250,AT2G44680 Phypa1|39224,Phypa1|2904,Phypa1|25085,Phypa1|8699  
 AT3G20290,AT4G05520 Phypa1|30539,Phypa1|34158  
 AT3G54610 Phypa1|27130  
 AT1G68000,AT4G38570 Phypa1|28801  
 AT3G63060,AT5G39360,AT5G15440 Phypa1|29225  
 AT5G22110Phypa1|39057  
 AT5G61220 Phypa1|39376,Phypa1|25928  
 AT1G70160,AT4G27020,AT5G54870 Phypa1|37916,Phypa1|37537  
 AT3G58170,AT4G14455 Phypa1|24091,Phypa1|37840  
 AT1G31660 Phypa1|8465,Phypa1|27936,Phypa1|33072  
 AT1G26090 Phypa1|35126  
 Phypa1|24772,Phypa1|512  
 AT1G02510  
 AT5G46360,AT5G46370,AT4G18160,AT4G01840  
 AT5G55630 Phypa1|30143  
 Phypa1|19344,Phypa1|15445  
 AT1G09995,AT1G79890 Phypa1|39650  
 AT3G07060 Phypa1|16938,Phypa1|3348  
 AT1G49590 Phypa1|29597  
 AT1G78100,AT1G22220,AT4G18380,AT5G46170,AT1G30200 Phypa1|32832,Phypa1|37148  
 AT4G37200 Phypa1|29435  
 AT2G37290,AT2G39280,AT3G55020 Phypa1|34307,Phypa1|25646  
 AT3G16190 Phypa1|30927,Phypa1|24194  
 AT1G52325,AT1G80930 Phypa1|33325  
 AT2G01110  
 Phypa1|22435  
 Phypa1|25773,Phypa1|27383  
 AT1G26810,AT3G06440 Phypa1|29434  
 AT1G27120,AT1G74800,AT5G62620  
 AT4G21060 Phypa1|2949,Phypa1|14880  
 AT4G33350,AT3G23710 Phypa1|35200,Phypa1|10654  
 AT4G18810 Phypa1|2426  
 AT5G53000 Phypa1|8716,Phypa1|32954  
 AT1G73790,AT4G09550 Phypa1|38882,Phypa1|28061  
 AT2G35020,AT1G31070 Phypa1|27561,Phypa1|38240  
 AT3G23570,AT3G23600  
 Phypa1|29740,Phypa1|29347  
 Phypa1|26476  
 Phypa1|26612  
 AT3G61970,AT2G46870,AT4G01500,AT1G01030,AT3G11580,AT5G06250,AT2G36080,AT1G51120,AT1G50680,AT1  
 G13260,AT3G25730,AT1G25560,AT1G68840 Phypa1|1930  
 AT1G64980 Phypa1|661  
 AT2G16070 Phypa1|2031



AT3G44190,AT5G22140 Phypa1|10655,Phypa1|24057  
AT4G16444 Phypa1|7692  
AT1G31190Phypa1|136  
Phypa1|21315,Phypa1|30458  
AT3G02870 Phypa1|39499,Phypa1|39542,Phypa1|38385  
Phypa1|35818  
AT2G14170 Phypa1|38382  
Phypa1|21723,Phypa1|30436  
Phypa1|27335  
Phypa1|20915,Phypa1|30814  
Phypa1|21960,Phypa1|30823  
Phypa1|31088,Phypa1|30950  
Phypa1|30032  
Phypa1|29257,Phypa1|31385,Phypa1|1307  
Phypa1|25191  
Phypa1|30822  
AT3G24503  
AT3G66658 Phypa1|30453,Phypa1|3038  
AT1G79440 Phypa1|24634,Phypa1|35187  
Phypa1|30725  
AT3G48000,AT1G23800 Phypa1|30894  
Phypa1|20546,Phypa1|21566  
Phypa1|3086  
Phypa1|23002  
AT1G54100 Phypa1|24219  
AT1G74920,AT3G48170 Phypa1|38349  
Phypa1|23160  
Phypa1|38969,Phypa1|31120,Phypa1|30841  
Phypa1|31290  
AT2G42975 Phypa1|34438  
AT3G28250,AT2G43670,AT2G43660,AT1G78520  
AT5G24318,AT3G46570,AT2G39640,AT3G55430  
Phypa1|21276,Phypa1|32197,Phypa1|1075,Phypa1|3014,Phypa1|3015,Phypa1|2984  
AT1G09460  
AT4G13600,AT5G67460,AT2G03505,AT1G13830,AT5G08000,AT5G61130,AT1G18650,AT1G26450,AT1G69295  
Phypa1|840  
Phypa1|298  
AT5G35740,AT2G04910,AT1G29380,AT2G30933,AT5G53600,AT5G53610,AT5G63230,AT4G09090,AT5G63250,AT5  
G63240,AT4G16165,AT1G66870,AT1G66855  
Phypa1|850  
AT3G58100  
AT2G42930  
Phypa1|2202  
AT2G16230,AT4G34480,AT5G42720  
Phypa1|297  
AT5G55180,AT4G26830,AT2G05790 Phypa1|2637,Phypa1|34130,Phypa1|24687  
Phypa1|2382  
AT3G07320,AT4G14080,AT3G23770  
Phypa1|16133,Phypa1|32924,Phypa1|37529,Phypa1|521,Phypa1|4095,Phypa1|16853,Phypa1|2971,Phyp  
a1|14068,Phypa1|29921,Phypa1|20698,Phypa1|25989,Phypa1|29585  
AT1G30080,AT4G18340,AT2G27500,AT1G32860,AT5G42100,AT3G15800,AT2G26600  
AT3G13560,AT2G01630,AT1G66250,AT1G11820  
Phypa1|24275,Phypa1|35647,Phypa1|38906,Phypa1|37271,Phypa1|27164  
Phypa1|37850  
AT4G05430  
AT4G16260,AT3G57240,AT3G57260,AT3G57270,AT1G77790,AT1G77780,AT5G20340,AT5G20330,AT1G33220,AT5  
G20390,AT5G20560  
AT5G56590,AT4G29360  
AT3G55780,AT3G61810  
AT1G79915 Phypa1|28830  
AT1G28510,AT3G58150 Phypa1|10594,Phypa1|37172,Phypa1|2141  
AT5G10200,AT3G50030,AT5G43120 Phypa1|29244,Phypa1|37171  
AT1G43860 Phypa1|37808  
AT1G02120 Phypa1|28039  
AT1G42550 Phypa1|27309  
AT2G32415 Phypa1|899  
AT4G29060 Phypa1|33352,Phypa1|26888,Phypa1|948  
AT4G32260 Phypa1|28762,Phypa1|25051  
AT3G03790 Phypa1|29141  
AT3G17920,AT1G48540 Phypa1|6999,Phypa1|33885  
AT2G33280,AT1G04570,AT1G64890 Phypa1|21459,Phypa1|25238,Phypa1|39397,Phypa1|1872  
Phypa1|33504  
AT5G28750 Phypa1|37007,Phypa1|39257  
AT1G34360 Phypa1|31885  
AT1G36280,AT4G18440  
Phypa1|23517  
Phypa1|38792  
Phypa1|2404  
AT3G56750,AT2G41150 Phypa1|1016  
AT3G01740,AT5G14290 Phypa1|1276  
AT1G22620,AT3G43220,AT5G20840,AT3G14205,AT1G17340

Phypa1|26629,Phypa1|26260,Phypa1|37170,Phypa1|29182  
AT2G43950 Phypa1|35920,Phypa1|35966  
AT4G20960 Phypa1|26912  
AT1G10480,AT1G68360,AT1G67030 Phypa1|25763  
AT1G76560 Phypa1|34327  
AT3G62410,AT2G47400 Phypa1|25877,Phypa1|25424,Phypa1|28435  
AT1G32340 Phypa1|25027  
Phypa1|25614  
AT4G09820  
AT5G41315,AT1G63650,AT4G00480 Phypa1|3725,Phypa1|28544,Phypa1|37802  
AT1G18000,AT1G18010 Phypa1|25133  
AT2G18230,AT4G01480,AT1G01050,AT2G46860,AT3G53620  
Phypa1|29961,Phypa1|31024,Phypa1|26162,Phypa1|28194,Phypa1|34918  
AT4G04470,AT4G14305 Phypa1|28266,Phypa1|28268,Phypa1|24250  
AT1G07020 Phypa1|35798  
Phypa1|2451,Phypa1|24180,Phypa1|34189,Phypa1|34674,Phypa1|36402  
AT3G04200,AT3G05950,AT3G04180,AT3G04190,AT3G04150,AT3G04170,AT5G38930,AT5G38940,AT5G38910,AT4  
G14630,AT5G38950,AT5G38960,AT5G39180,AT5G39150,AT5G39120,AT5G39110,AT5G39100,AT5G39190,AT5G39  
160,AT5G39130  
AT1G72610,AT5G20630  
AT1G10460,AT5G61750  
AT3G10080  
Phypa1|21570,Phypa1|6192  
AT3G62020,AT1G09560,AT3G05930,AT5G26700,AT1G18970,AT1G18980,AT1G74820  
Phypa1|334,Phypa1|16636,Phypa1|33449,Phypa1|27065,Phypa1|2433,Phypa1|38332,Phypa1|33250,Phy  
pa1|33252,Phypa1|9716,Phypa1|2973,Phypa1|30166,Phypa1|24243,Phypa1|2594,Phypa1|33512  
AT3G24460,AT4G13345,AT2G33205 Phypa1|24882,Phypa1|37182  
AT5G24910,AT5G24900 Phypa1|15743,Phypa1|28381,Phypa1|13638,Phypa1|36188,Phypa1|37722  
Phypa1|31032,Phypa1|25517  
AT1G75130,AT2G26710,AT3G14660,AT3G14690,AT3G14640,AT3G14680,AT3G14610,AT3G14630,AT3  
G14620,AT1G17060,AT2G46950,AT4G27710,AT2G46960  
AT1G67110,AT5G38450,AT5G52400  
AT1G17330 Phypa1|24404  
AT1G78510,AT1G17050 Phypa1|28874,Phypa1|26371  
AT2G34630 Phypa1|26426,Phypa1|4214  
Phypa1|31289,Phypa1|31452  
Phypa1|23296  
AT2G19520,AT4G29730 Phypa1|16443  
AT3G27610,AT2G01220 Phypa1|26438,Phypa1|36220  
AT2G45620 Phypa1|37244  
AT3G50860 Phypa1|27966  
AT2G19790 Phypa1|38128  
AT1G47830 Phypa1|37767,Phypa1|39377  
AT4G35410,AT2G17380 Phypa1|27754,Phypa1|39401  
AT3G28340  
AT1G13250,AT3G06260,AT1G19300,AT3G50760,AT1G02720,AT4G02130,AT3G62660  
Phypa1|26085,Phypa1|39515  
AT1G24170,AT1G70090 Phypa1|3891,Phypa1|39062,Phypa1|17188  
AT1G52160,AT3G16260 Phypa1|1067,Phypa1|39050  
AT1G53520 Phypa1|26693  
AT5G10900  
AT5G43380  
AT3G46820,AT5G59160  
Phypa1|2810  
AT1G59830,AT1G10430,AT1G69960 Phypa1|37030,Phypa1|39635  
AT3G58500,AT2G42500 Phypa1|33546,Phypa1|24173,Phypa1|33547  
AT2G39840 Phypa1|38904,Phypa1|32096,Phypa1|18631,Phypa1|38512  
AT1G50370,AT3G19980 Phypa1|37600,Phypa1|38431  
AT5G55260,AT4G26720 Phypa1|38073,Phypa1|34725  
AT4G11240,AT1G64040  
AT2G29400  
AT5G63870 Phypa1|28977,Phypa1|27236,Phypa1|38914  
AT3G05580,AT5G27840  
AT1G48120  
AT2G42810 Phypa1|23879,Phypa1|23866  
AT1G48175 Phypa1|14310  
AT5G08060 Phypa1|1253  
AT3G46870,AT1G62350 Phypa1|34557  
AT3G55160 Phypa1|27783  
AT2G46980 Phypa1|5709  
AT1G72380 Phypa1|24274,Phypa1|8578  
AT1G72390  
Phypa1|20828  
Phypa1|23314  
Phypa1|12748  
AT5G12850  
AT2G41900  
AT5G07500  
AT3G55980,AT2G40140,AT5G58620  
Phypa1|29343  
Phypa1|29814,Phypa1|29818,Phypa1|28681  
Phypa1|30617

AT5G44260,AT1G03790  
AT2G19810,AT4G29190,AT2G25900  
AT4G21700 Phypa1|25257  
AT1G79790 Phypa1|26896  
AT3G06483 Phypa1|29985,Phypa1|39358  
AT4G33925 Phypa1|36950  
AT1G08233 Phypa1|37157  
AT1G08230 Phypa1|2706,Phypa1|30661,Phypa1|37156  
AT5G40780,AT1G48640,AT1G67640,AT1G24400,AT3G01760,AT1G61270  
Phypa1|36834,Phypa1|27578,Phypa1|24603  
AT1G47670,AT4G35180 Phypa1|26950  
AT1G25530  
AT5G41800  
AT1G71680  
AT1G16080 Phypa1|627  
AT2G30320 Phypa1|28521  
AT3G51820 Phypa1|24626  
AT2G27530,AT1G08360,AT5G22440 Phypa1|36419,Phypa1|24132,Phypa1|24258  
AT1G80280,AT1G15490,AT1G52750,AT3G55880,AT2G40095  
Phypa1|29071,Phypa1|37563,Phypa1|37124,Phypa1|2694  
AT3G10840 Phypa1|28022  
AT5G57300 Phypa1|31318,Phypa1|36497  
AT4G02030 Phypa1|411,Phypa1|37131  
AT3G56660,AT2G40950,AT3G10800 Phypa1|824,Phypa1|25423  
AT5G23120 Phypa1|28793,Phypa1|32143  
AT5G52470,AT4G25630,AT5G52490  
Phypa1|8698,Phypa1|37795,Phypa1|28234,Phypa1|28682,Phypa1|25054,Phypa1|2998  
AT3G53630 Phypa1|256,Phypa1|730,Phypa1|34511  
AT5G50960 Phypa1|36661  
Phypa1|2236  
AT1G50900 Phypa1|764  
AT2G15220,AT2G15130,AT2G15170 Phypa1|37364  
AT3G01160Phypa1|35173  
AT4G35040,AT2G16770,AT3G51960 Phypa1|1122  
AT5G19920,AT5G50970 Phypa1|27021  
AT1G26660 Phypa1|27147  
AT2G43370 Phypa1|9848  
AT1G35620 Phypa1|26423,Phypa1|1876  
Phypa1|4614  
AT5G02310 Phypa1|30254,Phypa1|26713,Phypa1|32484,Phypa1|27386  
AT5G42760 Phypa1|12792,Phypa1|28211  
AT3G43260,AT3G62530,AT3G58180 Phypa1|27025  
AT5G04830 Phypa1|32074,Phypa1|36337,Phypa1|25255,Phypa1|35589  
AT4G18820,AT5G45720 Phypa1|1090,Phypa1|21,Phypa1|24591  
AT2G02480,AT1G14460  
AT4G24790 Phypa1|35878  
AT2G28900 Phypa1|18667,Phypa1|35617  
Phypa1|29734,Phypa1|19201,Phypa1|29199,Phypa1|24257,Phypa1|33271,Phypa1|39485  
AT4G16160 Phypa1|8089,Phypa1|39187,Phypa1|28718  
AT4G13870,AT4G13885 Phypa1|17691  
AT4G24450,AT1G10760 Phypa1|26897,Phypa1|35994  
Phypa1|17982,Phypa1|5632,Phypa1|31011  
AT5G56010,AT5G56030,AT5G56000,AT5G52640  
Phypa1|24011,Phypa1|39378,Phypa1|36868,Phypa1|39540,Phypa1|29492  
AT3G07770  
AT2G04030 Phypa1|18243,Phypa1|39018  
Phypa1|36163  
Phypa1|4206  
Phypa1|14865  
Phypa1|29944  
Phypa1|4183  
AT4G24190 Phypa1|39049  
AT2G44850 Phypa1|29126,Phypa1|27289  
AT4G25950,AT3G01390,AT4G23710 Phypa1|38824,Phypa1|36213  
AT1G50450 Phypa1|2990  
AT2G20190 Phypa1|29047,Phypa1|25139,Phypa1|4209,Phypa1|8813  
AT3G58830 Phypa1|24963  
AT1G75670 Phypa1|26677  
Phypa1|3061  
Phypa1|23121  
AT3G23940 Phypa1|23921  
AT5G51400,AT2G45010 Phypa1|740,Phypa1|28416,Phypa1|25884,Phypa1|23824,Phypa1|38375  
AT4G30380 Phypa1|33643  
AT2G18660 Phypa1|27122  
AT5G48520 Phypa1|36002  
AT3G57200,AT2G41450,AT3G08550 Phypa1|39126,Phypa1|28221  
AT3G08740 Phypa1|25297,Phypa1|31097,Phypa1|8338  
AT2G45100,AT3G09360,AT2G01280,AT4G19550 Phypa1|27879  
AT4G05523,AT1G13120 Phypa1|29968  
Phypa1|31315  
AT3G22425,AT4G14910 Phypa1|25869  
AT3G17470 Phypa1|24739,Phypa1|28613

AT1G67840 Phypa1|34031  
AT2G28500,AT1G07900  
AT2G42440,AT3G58190  
AT1G31320 Phypa1|277,Phypa1|770,Phypa1|28824  
AT3G11090  
AT5G63090,AT3G27650  
AT2G31310  
AT3G47870  
AT1G65620 Phypa1|792,Phypa1|791,Phypa1|794,Phypa1|1212  
AT1G16530  
AT2G42430  
Phypa1|768  
AT3G26660,AT3G26620,AT3G50510  
AT3G03760 Phypa1|754  
Phypa1|2142,Phypa1|1077,Phypa1|241  
AT4G00220,AT2G45420 Phypa1|2152  
Phypa1|26744,Phypa1|1202  
AT1G36000,AT2G19510,AT2G19820,AT3G27940,AT1G06280  
AT3G13850,AT1G72980  
AT2G45410,AT4G00210  
Phypa1|39254,Phypa1|745,Phypa1|1259,Phypa1|37231,Phypa1|1178,Phypa1|1213,Phypa1|837,Phypa1|1  
214  
AT5G66870  
AT2G30130  
Phypa1|779  
AT4G22700,AT5G35900,AT2G23660  
AT2G30340  
AT2G40470 Phypa1|1563  
AT5G06080  
AT2G21070 Phypa1|30282  
AT5G11520,AT1G62800,AT5G19550 Phypa1|28043  
AT4G31990 Phypa1|34985,Phypa1|21937  
AT2G30970 Phypa1|34815  
AT2G30060,AT1G07140,AT5G58590 Phypa1|703,Phypa1|24007,Phypa1|1542,Phypa1|1544  
AT1G44920 Phypa1|206  
Phypa1|28657,Phypa1|36047  
AT1G09830 Phypa1|20564  
AT2G20495 Phypa1|2669  
AT1G19130 Phypa1|28942  
AT1G14850 Phypa1|27374  
AT5G23230,AT5G23220 Phypa1|27295  
AT4G10710,AT4G10670 Phypa1|30324  
AT5G51290,AT4G29330 Phypa1|8194,Phypa1|31636  
Phypa1|31094,Phypa1|30024,Phypa1|19375  
AT4G24080,AT4G24070,AT4G10750 Phypa1|25464  
AT5G21930 Phypa1|28880  
Phypa1|22308  
AT4G37270 Phypa1|29751,Phypa1|26415  
AT1G63440  
Phypa1|32036  
Phypa1|1699  
Phypa1|19892,Phypa1|33460  
AT5G44790 Phypa1|37508,Phypa1|11422  
Phypa1|5497  
AT4G33520 Phypa1|25228,Phypa1|39029  
Phypa1|23408,Phypa1|22881  
Phypa1|19869  
Phypa1|31373  
AT3G51980 Phypa1|28334  
AT4G38060,AT5G65480 Phypa1|32119,Phypa1|34421,Phypa1|14925  
AT1G11780Phypa1|34827  
AT2G39410,AT2G39420,AT3G55180,AT2G39400,AT3G55190  
AT1G11090Phypa1|26001  
AT2G47630,AT3G62860 Phypa1|36442,Phypa1|36843,Phypa1|30405  
AT5G19290,AT5G14980 Phypa1|35978,Phypa1|37328  
AT1G52760 Phypa1|23720  
AT5G16120,AT1G77420 Phypa1|25277,Phypa1|30159,Phypa1|27240,Phypa1|2768  
AT1G69210,AT1G77122 Phypa1|33747  
Phypa1|27377,Phypa1|36972  
AT4G30680,AT1G62410,AT2G24050,AT5G57870  
Phypa1|918,Phypa1|919,Phypa1|421,Phypa1|1770,Phypa1|36698  
AT3G60240  
AT1G29395,AT1G29390 Phypa1|1229  
AT3G10550,AT5G04540 Phypa1|461,Phypa1|6847  
AT2G17900 Phypa1|32341,Phypa1|37715  
AT4G26000,AT3G04610 Phypa1|1839,Phypa1|1861  
AT5G04040,AT3G57140 Phypa1|26052,Phypa1|25623,Phypa1|31058  
AT2G20330 Phypa1|38005  
AT3G27320,AT5G14310 Phypa1|39781  
AT1G10030 Phypa1|24135  
AT3G55200,AT3G55220 Phypa1|39675,Phypa1|16114,Phypa1|34495  
AT2G28450 Phypa1|28259

AT2G01460 Phypa1|30146  
AT4G12690,AT2G04220,AT5G48270,AT3G13229,AT2G27770,AT2G36470,AT5G11000,AT2G25200,AT3G04860,AT5  
G28150 Phypa1|37195,Phypa1|37332  
AT1G16300,AT1G79530  
Phypa1|29892,Phypa1|29890,Phypa1|2662,Phypa1|23689,Phypa1|26242,Phypa1|37478,Phypa1|30069,P  
hypa1|2836,Phypa1|26240,Phypa1|31010,Phypa1|30811,Phypa1|31464  
AT3G04120,AT1G13440 Phypa1|24119,Phypa1|39632  
AT2G34380,AT1G29760,AT5G16460 Phypa1|789,Phypa1|142  
AT4G28000,AT1G64110  
AT4G02480,AT1G02890 Phypa1|24514,Phypa1|2574  
AT1G62130,AT4G24860  
AT3G19740,AT1G50140 Phypa1|33175,Phypa1|24512  
AT2G21350,AT4G39040 Phypa1|33078  
AT5G50200,AT4G24720 Phypa1|38287,Phypa1|39075,Phypa1|33685  
AT2G14660 Phypa1|793  
AT4G21010,AT4G20330 Phypa1|28982,Phypa1|37374  
AT1G25375 Phypa1|29449  
AT1G13890,AT5G61210,AT5G07880 Phypa1|37447,Phypa1|202,Phypa1|13748  
AT5G58220 Phypa1|37533  
AT5G54290 Phypa1|29410  
AT1G21650 Phypa1|30647  
Phypa1|31888  
Phypa1|23238,Phypa1|31064  
Phypa1|35475  
AT4G01800 Phypa1|38208  
AT4G15030 Phypa1|36886  
AT5G57440,AT4G25840 Phypa1|35599  
AT4G09020 Phypa1|36215  
AT2G39930 Phypa1|36375  
AT1G03310 Phypa1|38673  
AT1G27150,AT1G27110 Phypa1|37458  
AT4G37670,AT2G22910 Phypa1|1795,Phypa1|2247  
Phypa1|31446,Phypa1|31274,Phypa1|30810  
Phypa1|267  
AT1G13270,AT3G25740  
Phypa1|27876  
AT4G37040 Phypa1|30418,Phypa1|27258  
AT2G45240 Phypa1|24006,Phypa1|2482  
Phypa1|31154,Phypa1|30485  
Phypa1|30954  
Phypa1|22321,Phypa1|20536,Phypa1|22987  
Phypa1|30579  
AT3G55850 Phypa1|28346  
AT4G23890 Phypa1|37158  
Phypa1|22744  
AT2G20360 Phypa1|23749,Phypa1|33399  
AT1G52870,AT4G03410 Phypa1|28609,Phypa1|578  
AT2G46090 Phypa1|24976,Phypa1|2629  
AT2G42310,AT3G57785 Phypa1|28924,Phypa1|1277  
Phypa1|33391,Phypa1|4894  
AT4G02720 Phypa1|36924  
AT1G63540,AT1G63530,AT1G59660,AT1G10390 Phypa1|16843,Phypa1|35376  
AT5G05980,AT3G55630,AT3G10160 Phypa1|29016,Phypa1|34563  
Phypa1|30884  
AT1G26520 Phypa1|25036  
Phypa1|6630,Phypa1|32091,Phypa1|22862,Phypa1|23644,Phypa1|23394  
AT1G80480,AT1G15730 Phypa1|1409  
AT5G24580,AT5G50730,AT5G63530,AT5G50740,AT3G02960,AT1G29000,AT5G60800,AT2G28090,AT5G03380,AT2  
G36950,AT1G03320,AT3G21490 Phypa1|33298  
AT3G11250,AT3G09200,AT2G40010 Phypa1|36409,Phypa1|36388  
AT1G73875,AT3G18500,AT5G11350  
Phypa1|26497,Phypa1|29385  
AT3G58560,AT3G58580 Phypa1|24083,Phypa1|37970,Phypa1|23894,Phypa1|3057  
AT1G31530  
AT1G31500 Phypa1|24930  
Phypa1|15561  
AT5G07020 Phypa1|34596,Phypa1|35710  
AT1G61240,AT1G11170  
Phypa1|25132,Phypa1|26600,Phypa1|32260  
AT4G18530 Phypa1|25165,Phypa1|11297,Phypa1|26605,Phypa1|26925  
AT2G28310,AT1G08040,AT3G26440,AT1G13000,AT3G27470,AT1G67850,AT1G24570  
Phypa1|30712,Phypa1|39060,Phypa1|36749  
AT4G12840  
AT3G54970 Phypa1|184  
AT4G31150Phypa1|27714  
AT1G64200,AT4G11150,AT3G08560  
Phypa1|9734,Phypa1|39484,Phypa1|37811,Phypa1|9733,Phypa1|14967  
AT5G22010 Phypa1|29190  
AT5G43500 Phypa1|25415  
AT4G16155,AT3G16950 Phypa1|27694,Phypa1|25805,Phypa1|38011  
Phypa1|22468,Phypa1|30051  
Phypa1|19366,Phypa1|31440

Phypa1|30670  
 Phypa1|6762  
 AT3G50560 Phypa1|27521,Phypa1|27988  
 AT4G26230,AT5G56710,AT2G19740  
 Phypa1|32864,Phypa1|36294,Phypa1|36841,Phypa1|38643,Phypa1|38404  
 AT1G30910,AT5G44720 Phypa1|33854,Phypa1|24785  
 AT5G14910 Phypa1|32311,Phypa1|34097,Phypa1|33050,Phypa1|20767  
 AT5G63880,AT5G09260 Phypa1|3053  
 Phypa1|20551  
 AT5G15920 Phypa1|39498  
 AT2G16570,AT4G34740,AT4G38880 Phypa1|35998,Phypa1|36592  
 Phypa1|31376,Phypa1|30426  
 AT4G14040,AT4G14030,AT3G23800 Phypa1|31779  
 Phypa1|1515  
 Phypa1|23540  
 Phypa1|23311  
 AT3G02090 Phypa1|36847  
 AT4G25120 Phypa1|21748,Phypa1|896  
 AT2G15560 Phypa1|24541,Phypa1|26450,Phypa1|35923,Phypa1|27623,Phypa1|32764,Phypa1|14565  
 AT2G38020 Phypa1|37678  
 AT1G61780 Phypa1|861  
 Phypa1|36284  
 AT4G18905,AT4G18900,AT4G35370 Phypa1|1863  
 AT2G42780 Phypa1|34406,Phypa1|34152  
 AT1G79690 Phypa1|18018  
 AT4G14590 Phypa1|2068  
 AT5G06430 Phypa1|38092  
 Phypa1|20545,Phypa1|23616,Phypa1|22812  
 AT5G65720 Phypa1|26090,Phypa1|14958  
 AT2G32520 Phypa1|4968  
 AT2G35050,AT1G16270,AT1G79570,AT1G04700,AT3G24720,AT5G57610,AT3G46920 Phypa1|23844  
 Phypa1|28035  
 AT1G47420 Phypa1|28805  
 AT5G19980 Phypa1|38276,Phypa1|38551,Phypa1|602  
 AT1G76340 Phypa1|37097  
 AT2G20280 Phypa1|1024,Phypa1|127  
 AT5G25610,AT1G49320 Phypa1|30328,Phypa1|28953,Phypa1|2058,Phypa1|37884,Phypa1|6099  
 AT2G22040,AT3G18140 Phypa1|34022  
 AT2G47470 Phypa1|28923  
 AT1G07960 Phypa1|810  
 AT1G33140,AT1G33120,AT4G10450  
 Phypa1|36837,Phypa1|36618,Phypa1|24081,Phypa1|37416,Phypa1|39252  
 AT5G06140 Phypa1|39002  
 AT2G02550 Phypa1|4427  
 AT1G18090  
 Phypa1|37625,Phypa1|24837  
 AT1G29630  
 AT3G51790 Phypa1|32447  
 AT1G30880 Phypa1|34405  
 AT3G13940 Phypa1|34797  
 AT4G37000 Phypa1|27079  
 AT3G23610,AT3G06110,AT5G23720 Phypa1|38868  
 AT4G34310 Phypa1|5251,Phypa1|32191  
 AT2G40360 Phypa1|24476  
 AT5G13630 Phypa1|19906,Phypa1|39625  
 AT2G21820 Phypa1|25314  
 Phypa1|25440  
 AT5G13750,AT5G13740,AT3G43790 Phypa1|25105,Phypa1|36909  
 Phypa1|3056  
 Phypa1|30603  
 AT5G61510 Phypa1|8099,Phypa1|24151  
 Phypa1|31106  
 AT4G21580 Phypa1|37193  
 Phypa1|36531  
 Phypa1|29518  
 AT5G52150  
 AT3G47180  
 AT2G37150  
 AT3G63530  
 AT5G10650,AT5G24870,AT4G31450  
 AT1G73760,AT1G17970  
 AT1G53190,AT3G15070  
 AT3G19910 Phypa1|27772  
 Phypa1|28484,Phypa1|29450  
 AT1G72020 Phypa1|31017  
 AT5G47770,AT4G17190 Phypa1|38923  
 AT3G59280,AT5G61880 Phypa1|38377,Phypa1|36477  
 AT3G54170 Phypa1|33138,Phypa1|34416  
 AT1G22850 Phypa1|146,Phypa1|1052,Phypa1|30247,Phypa1|21177  
 AT1G53720,AT1G44478 Phypa1|26140  
 AT5G49550 Phypa1|2208  
 AT1G60200 Phypa1|38821,Phypa1|1573

AT1G33810 Phypa1|31513  
AT1G76010,AT1G20220  
AT1G72080 Phypa1|34082  
Phypa1|38300,Phypa1|31738,Phypa1|27346  
AT5G20470 Phypa1|28016  
Phypa1|29228,Phypa1|25161,Phypa1|37467,Phypa1|27553,Phypa1|28897  
AT1G04600,AT2G33240,AT1G04160,AT5G43900,AT2G20290  
AT4G28710 Phypa1|9619,Phypa1|37218  
AT4G33200  
AT5G20450,AT1G42680  
AT4G28715  
AT1G08730,AT1G54560,AT5G20490,AT1G17580  
AT2G31900  
Phypa1|9109  
Phypa1|9618  
AT4G27370,AT5G54280,AT1G50360,AT3G19960  
AT3G58160  
AT2G46710 Phypa1|1939  
Phypa1|528  
AT4G03100  
Phypa1|1006,Phypa1|27613  
Phypa1|1922,Phypa1|1871  
AT5G22400,AT2G27440,AT1G08340,AT3G11490  
AT1G72320 Phypa1|35260  
AT1G12060,AT2G46240  
Phypa1|33102,Phypa1|31613,Phypa1|33771,Phypa1|32235,Phypa1|17359,Phypa1|34349  
Phypa1|1308  
AT3G12680 Phypa1|524,Phypa1|27183  
AT2G32930,AT1G04990  
AT5G16540,AT3G02830  
Phypa1|508  
AT5G18550,AT3G06410,AT2G47850  
AT5G63260,AT3G48440,AT1G48195  
Phypa1|1309  
AT1G29600  
AT3G24100,AT4G13615 Phypa1|2238,Phypa1|3967  
Phypa1|28012,Phypa1|23926,Phypa1|7484,Phypa1|34304,Phypa1|24323,Phypa1|13758  
AT4G02780,AT1G61120 Phypa1|7483  
Phypa1|1683  
Phypa1|1680  
Phypa1|37634  
AT4G21810,AT4G04860 Phypa1|37691,Phypa1|23851  
AT4G18890,AT1G78700,AT1G19350,AT1G75080,AT3G50750,AT4G36780 Phypa1|35451,Phypa1|35441  
AT4G28690,AT2G20310 Phypa1|32712  
AT5G20935 Phypa1|34652  
AT5G35910,AT1G54440 Phypa1|30653  
AT5G25080 Phypa1|32303  
AT2G04842 Phypa1|36335,Phypa1|27128  
Phypa1|23412,Phypa1|22633  
AT1G18130,AT5G26830,AT1G17960  
Phypa1|39687  
Phypa1|15158  
AT4G34290,AT2G14880  
AT3G48600,AT1G31760,AT3G03590,AT2G35605  
AT4G26810 Phypa1|25466,Phypa1|27101  
AT1G49520,AT3G19080 Phypa1|27233,Phypa1|37040  
AT2G14260 Phypa1|38999  
AT1G70170,AT1G24140,AT1G59970  
AT2G45040,AT4G16640 Phypa1|1951  
Phypa1|1949  
AT2G35940,AT2G27220,AT4G34610,AT2G16400,AT1G75410,AT1G19700,AT1G75430,AT2G23760,AT4G36870,AT5  
G41410  
AT5G02030,AT2G27990 Phypa1|16934,Phypa1|17989  
AT4G32980 Phypa1|8613  
AT3G17205 Phypa1|37463  
Phypa1|36910  
AT1G55860,AT1G70320  
Phypa1|7719,Phypa1|28147  
Phypa1|26709,Phypa1|29578  
Phypa1|23789  
Phypa1|37702  
Phypa1|30596  
Phypa1|31328  
Phypa1|31202  
Phypa1|31489  
AT4G34200,AT3G19480 Phypa1|25916,Phypa1|35930,Phypa1|3534,Phypa1|4573,Phypa1|27189  
AT1G72190 Phypa1|27041,Phypa1|27325  
AT1G17745  
AT3G12670,AT2G34890,AT1G30820,AT4G20320  
AT4G02120 Phypa1|37066,Phypa1|39196  
Phypa1|21958,Phypa1|35315

Phypa1|31310  
AT3G22570,AT3G22580  
AT5G13900 Phypa1|34334,Phypa1|24743,Phypa1|35335  
AT1G27950,AT4G14815,AT3G22600,AT2G48130,AT1G03103,AT2G27130,AT3G43720,AT2G13820,AT5G64080,AT5  
G09370,AT1G36150,AT4G08670  
AT3G22620,AT1G05450,AT2G48140  
Phypa1|1604,Phypa1|33136,Phypa1|29313,Phypa1|1684,Phypa1|32883,Phypa1|35577  
Phypa1|19461  
Phypa1|20872  
Phypa1|30955,Phypa1|31089,Phypa1|36083  
Phypa1|30932  
AT3G16700,AT4G15940 Phypa1|28026  
AT5G65760,AT5G22860,AT3G28680,AT2G24280 Phypa1|37580  
AT1G10670,AT1G60810,AT1G09430 Phypa1|36677,Phypa1|35976  
AT1G16445 Phypa1|31325,Phypa1|2721  
AT5G54770  
Phypa1|24831,Phypa1|24843,Phypa1|36025,Phypa1|33611,Phypa1|27343,Phypa1|25130,Phypa1|4601,P  
hupa1|9330  
AT2G30620,AT1G06760,AT2G18050  
Phypa1|38454,Phypa1|3744,Phypa1|6232,Phypa1|21853,Phypa1|5981  
AT5G14320 Phypa1|29494,Phypa1|29501,Phypa1|1198  
AT1G77750 Phypa1|31355  
AT2G26570,AT4G33390,AT1G45545,AT5G42880  
Phypa1|17953  
AT5G55860,AT1G12150,AT4G17210,AT3G13190  
Phypa1|20739,Phypa1|11049,Phypa1|32409,Phypa1|18692  
AT2G29980,AT3G11170,AT5G05580  
Phypa1|36695,Phypa1|27427,Phypa1|38731,Phypa1|29429,Phypa1|37291,Phypa1|23807,Phypa1|2511  
AT3G12120 Phypa1|36177,Phypa1|36283  
AT2G46880,AT5G63140  
AT5G57140 Phypa1|26326  
Phypa1|2752  
AT2G42490 Phypa1|36361,Phypa1|36231,Phypa1|20111,Phypa1|36003,Phypa1|28689  
AT4G37120,AT1G65660,AT3G45950 Phypa1|36167  
AT5G03900 Phypa1|20351,Phypa1|48  
AT3G28880  
Phypa1|2316,Phypa1|27896  
Phypa1|10136  
AT3G59050,AT2G43020 Phypa1|39333,Phypa1|38359  
AT1G65840 Phypa1|3903  
AT1G52155 Phypa1|29073,Phypa1|29510,Phypa1|34599,Phypa1|28460,Phypa1|33237,Phypa1|36751  
AT3G15470,AT5G54200 Phypa1|8060,Phypa1|29123,Phypa1|39532,Phypa1|24074,Phypa1|28261  
AT2G37670,AT5G02430  
Phypa1|14069,Phypa1|8061  
AT5G53500,AT5G24320,AT1G64610,AT5G42010,AT1G48870  
AT5G17210 Phypa1|16089,Phypa1|2334  
Phypa1|33029  
AT3G09630,AT5G02870 Phypa1|24126,Phypa1|31995,Phypa1|36420,Phypa1|4469  
AT4G21110Phypa1|36203,Phypa1|37286  
AT4G32770 Phypa1|31689,Phypa1|28007  
AT3G13882 Phypa1|33721  
Phypa1|12417  
AT3G16310 Phypa1|28569,Phypa1|21600  
AT1G63780 Phypa1|19781,Phypa1|39612  
AT5G16620 Phypa1|34215,Phypa1|33783  
AT2G46420,AT3G61700,AT5G04090,AT3G10250,AT5G02580,AT3G28990,AT3G55240  
Phypa1|35469,Phypa1|34981  
AT1G15240,AT2G15900 Phypa1|26721,Phypa1|8221,Phypa1|24698,Phypa1|9664  
AT4G19540 Phypa1|25217  
AT3G24430 Phypa1|20459,Phypa1|39702  
AT2G07560,AT3G42640,AT1G80660,AT2G18960,AT4G30190,AT5G57350,AT2G24520,AT5G62670,AT3G47950,AT3  
G60330,AT1G17260  
AT4G11730  
Phypa1|13786  
Phypa1|30544  
Phypa1|13664  
Phypa1|16998,Phypa1|37950  
AT5G46560 Phypa1|4026  
AT1G56230  
Phypa1|8441,Phypa1|19246,Phypa1|35809,Phypa1|15172,Phypa1|28241,Phypa1|12769,Phypa1|32222  
AT5G64630 Phypa1|37704  
AT5G57850 Phypa1|1921,Phypa1|39091,Phypa1|27532  
AT1G01210,AT4G07950 Phypa1|36874  
AT3G27890 Phypa1|30457  
Phypa1|24875  
AT1G73730  
AT5G65100,AT5G10120,AT5G21120  
AT2G27050,AT3G20770 Phypa1|27196  
AT1G18700 Phypa1|27439  
AT2G25870  
Phypa1|31365,Phypa1|31261,Phypa1|395  
Phypa1|9643



Phypa1|9642  
AT1G74530 Phypa1|27413  
AT3G26900 Phypa1|33729  
AT2G21940,AT4G39540 Phypa1|177  
Phypa1|8489  
AT2G21620 Phypa1|39078  
AT4G10955,AT2G05260,AT5G24220,AT5G24180,AT5G24190,AT5G24210,AT5G24200,AT5G24230  
Phypa1|35814,Phypa1|29868  
AT3G25690,AT1G48280,AT4G18570,AT1G07120,AT4G04980,AT1G11070  
Phypa1|36550,Phypa1|34833,Phypa1|898  
Phypa1|21359  
AT5G63920 Phypa1|30836  
AT2G32000 Phypa1|39757  
AT5G39410 Phypa1|3048,Phypa1|36813  
AT2G30350 Phypa1|17656  
AT5G42765 Phypa1|33467  
AT5G36210 Phypa1|7337,Phypa1|37284,Phypa1|7335,Phypa1|7336,Phypa1|31709  
Phypa1|34763  
AT4G16580 Phypa1|25610  
AT2G30170 Phypa1|29723,Phypa1|25950  
AT4G33500  
AT5G66720  
AT2G31140,AT1G06200 Phypa1|26794,Phypa1|38576  
AT4G15510 Phypa1|27224  
AT1G01860 Phypa1|32393  
AT3G48930,AT5G23740,AT4G30800 Phypa1|36178,Phypa1|36833,Phypa1|32300,Phypa1|32896  
AT5G42390 Phypa1|34758,Phypa1|29353  
AT4G39450 Phypa1|38122,Phypa1|38624,Phypa1|29557  
AT3G54826 Phypa1|26698  
AT5G49210 Phypa1|33223  
AT1G52570,AT3G15730,AT5G25370  
Phypa1|11390,Phypa1|38890,Phypa1|23696,Phypa1|38201,Phypa1|33037  
AT4G00240,AT2G42010,AT4G11850,AT4G11840,AT4G11830,AT4G35790  
Phypa1|25240,Phypa1|37956,Phypa1|14966,Phypa1|23775  
AT1G55180  
Phypa1|35928  
Phypa1|27959,Phypa1|29273  
Phypa1|31312  
AT3G26060 Phypa1|25573,Phypa1|27353  
AT1G33520,AT4G25020 Phypa1|35214  
AT1G33290  
AT3G10420 Phypa1|951  
AT1G73170 Phypa1|22113  
AT1G20225,AT1G76020 Phypa1|2065  
AT1G08550 Phypa1|28477  
AT5G61150Phypa1|19747  
Phypa1|23541  
Phypa1|23385  
AT5G09700,AT5G09730,AT5G64570,AT3G19620  
AT5G10560,AT1G78060 Phypa1|30550,Phypa1|37549  
Phypa1|23264  
AT5G49360,AT1G02640  
Phypa1|23274  
AT3G59490 Phypa1|16727  
AT1G18335 Phypa1|1106,Phypa1|27437  
AT5G01290,AT3G09100,AT5G28210 Phypa1|25041  
AT4G18230 Phypa1|28872  
AT5G43180  
AT4G31330,AT5G10580,AT5G24790 Phypa1|11746,Phypa1|1125  
AT5G46060 Phypa1|37890  
AT5G24600,AT3G18215  
AT3G50820,AT5G66570,AT4G37230 Phypa1|36648,Phypa1|39566,Phypa1|36216,Phypa1|38098  
AT3G56940 Phypa1|533,Phypa1|29315  
AT4G36760 Phypa1|27373  
AT3G05350 Phypa1|39689  
AT3G21400 Phypa1|28605  
AT5G49555 Phypa1|29183  
AT3G61010,AT5G05460,AT3G11040 Phypa1|24973  
AT1G34270 Phypa1|18411  
AT5G16890 Phypa1|25742  
AT3G03650,AT3G45400,AT1G74680  
Phypa1|37959,Phypa1|38941,Phypa1|999,Phypa1|23795,Phypa1|25567,Phypa1|992,Phypa1|2895  
AT2G35100,AT5G44930  
AT1G67410 Phypa1|19121,Phypa1|38266,Phypa1|24024  
AT5G47810  
Phypa1|29260,Phypa1|28893  
AT5G61580  
AT4G26270,AT5G56630,AT4G29220,AT4G32840  
Phypa1|29717,Phypa1|36856,Phypa1|28025,Phypa1|26746,Phypa1|30102  
AT2G22480 Phypa1|11424,Phypa1|38983  
AT4G03320 Phypa1|28869,Phypa1|26395  
AT1G08910,AT5G41580 Phypa1|34755

AT3G12080 Phypa1|31245,Phypa1|27893  
 AT3G15620 Phypa1|24906  
 AT4G04614 Phypa1|1595  
 AT1G13700  
 Phypa1|35070  
 AT5G24410,AT3G49360,AT5G24420,AT5G24400 Phypa1|3158  
 AT2G22370 Phypa1|39724  
 AT5G47790 Phypa1|26787  
 AT2G37975 Phypa1|38076  
 AT1G48420 Phypa1|29175  
 AT4G14147 Phypa1|34660  
 AT5G65860 Phypa1|38693  
 AT3G55480 Phypa1|36675  
 AT2G39630 Phypa1|27380,Phypa1|25050  
 AT1G07170,AT2G30000 Phypa1|38928  
 Phypa1|24228  
 AT5G43600  
 Phypa1|31408,Phypa1|30607,Phypa1|30479,Phypa1|3011,Phypa1|30486,Phypa1|30767,Phypa1|32276  
 AT1G49940,AT5G44330,AT4G20900,AT1G04770,AT5G48850,AT3G51280  
 Phypa1|24747,Phypa1|24753,Phypa1|2003,Phypa1|4242,Phypa1|25181  
 AT3G61030,AT3G60950,AT3G61050 Phypa1|963,Phypa1|36667,Phypa1|36452  
 AT5G13830 Phypa1|2770  
 AT5G16790,AT3G02950 Phypa1|37825  
 AT1G72750,AT1G17530,AT3G04800 Phypa1|1571,Phypa1|1572  
 AT5G57460 Phypa1|39701  
 AT1G19490 Phypa1|34146,Phypa1|12069  
 AT2G18110,AT1G30230,AT5G12110,AT5G19510 Phypa1|19665,Phypa1|39139,Phypa1|9858,Phypa1|2561  
 AT1G70770,AT1G23170,AT3G11880,AT2G18070 Phypa1|33913,Phypa1|32683  
 AT2G38650  
 Phypa1|36774,Phypa1|36559  
 AT3G01040,AT5G15470 Phypa1|5267,Phypa1|36018,Phypa1|36120  
 AT1G18580,AT3G25140,AT3G02350  
 AT3G61130,AT2G46480  
 AT4G38270 Phypa1|21809,Phypa1|13224,Phypa1|29430  
 AT3G58790  
 AT2G20810  
 AT5G47780  
 Phypa1|36180  
 Phypa1|32071,Phypa1|21810  
 AT5G54690  
 AT2G30575,AT1G06780  
 AT3G05000 Phypa1|24587,Phypa1|28799  
 AT5G51020 Phypa1|27537,Phypa1|38685  
 AT4G31130Phypa1|28252  
 AT3G02060 Phypa1|18569,Phypa1|38648  
 Phypa1|22042  
 AT1G48240,AT3G17440,AT2G35190  
 Phypa1|16648,Phypa1|24179,Phypa1|28307,Phypa1|38939,Phypa1|26494  
 AT5G22100 Phypa1|23837  
 AT1G04070,AT5G43970 Phypa1|1301,Phypa1|353  
 AT2G29210 Phypa1|37489,Phypa1|36587  
 AT5G66820 Phypa1|34229  
 AT4G32175,AT2G25355 Phypa1|37574  
 AT3G25520,AT5G39740 Phypa1|36980,Phypa1|38032,Phypa1|39653,Phypa1|38511  
 AT1G21350 Phypa1|29021,Phypa1|38522  
 AT5G22370 Phypa1|2874  
 AT3G14750,AT2G30120,AT5G61920,AT1G55170,AT1G67170 Phypa1|25768,Phypa1|230  
 AT5G57930,AT5G61930,AT1G64810,AT3G21740 Phypa1|2585  
 AT3G52300 Phypa1|28332,Phypa1|37357,Phypa1|30538  
 AT3G57000 Phypa1|1989  
 AT4G18920,AT5G45690,AT1G29680 Phypa1|37944,Phypa1|24086  
 Phypa1|7087  
 AT2G31985,AT1G05510 Phypa1|2740  
 AT1G16350,AT1G79470 Phypa1|39487,Phypa1|38407,Phypa1|30455  
 AT2G01860 Phypa1|29865  
 AT1G80520,AT1G15760,AT2G12462 Phypa1|16834  
 AT1G64300,AT5G41730,AT1G01450 Phypa1|1236,Phypa1|28891,Phypa1|16312  
 AT5G01460,AT3G08930 Phypa1|25138,Phypa1|28410  
 AT1G01880 Phypa1|38  
 AT4G13270,AT1G52330 Phypa1|25689,Phypa1|34897  
 AT2G35660,AT2G29720,AT5G05320,AT4G38540,AT4G15765,AT4G15760 Phypa1|1005,Phypa1|24410  
 AT1G55480 Phypa1|25258  
 AT3G24560 Phypa1|26017  
 AT5G16010 Phypa1|36563,Phypa1|30185  
 AT1G09330 Phypa1|24690,Phypa1|39000,Phypa1|4019,Phypa1|2139  
 AT1G74970 Phypa1|34611,Phypa1|27979,Phypa1|31438  
 AT5G60340 Phypa1|36537  
 AT2G03420 Phypa1|25351  
 AT5G23870,AT3G09410,AT4G19410,AT5G45280,AT4G19420,AT3G62060,AT2G46930,AT5G26670,AT3G05910,AT1  
 G09550,AT1G57590 Phypa1|28119  
 AT2G01720,AT1G76400 Phypa1|26118  
 AT4G21180,AT1G79940 Phypa1|34948

AT3G18370 Phypa1|35380,Phypa1|24092  
 Phypa1|4766  
 AT5G58575 Phypa1|275  
 AT1G68590,AT5G15760 Phypa1|34961,Phypa1|25028  
 AT1G67270,AT1G67780,AT5G38690 Phypa1|7097  
 AT1G78930 Phypa1|25688  
 AT1G66680 Phypa1|18982,Phypa1|1445  
 AT3G52030 Phypa1|33900  
 AT5G27970 Phypa1|28287  
 AT4G22610,AT4G22520,AT4G12490,AT4G12500,AT4G12470,AT4G12480,AT4G12510,AT4G12520,AT1G12090,AT1G62510,AT4G12545,AT4G12550,AT4G22460,AT4G12530,AT5G46890,AT5G46900,AT2G45180,AT1G12100,AT2G10940,AT1G62500,AT4G00165,AT4G22490 Phypa1|33115  
 AT5G03555 Phypa1|37448,Phypa1|25747,Phypa1|11677,Phypa1|21740,Phypa1|30912  
 AT5G40740 Phypa1|19268,Phypa1|18734,Phypa1|31817,Phypa1|34210  
 AT1G80680 Phypa1|35375,Phypa1|29094  
 AT3G54290 Phypa1|32817,Phypa1|33301,Phypa1|34060,Phypa1|26456,Phypa1|24542,Phypa1|3847,Phypa1|8939,Phypa1|35796  
 AT1G72040 Phypa1|16250,Phypa1|26797,Phypa1|9852,Phypa1|22720,Phypa1|33476  
 AT1G75060,AT1G19330 Phypa1|19687,Phypa1|38117,Phypa1|30158,Phypa1|671,Phypa1|207  
 Phypa1|35176  
 AT5G16400,AT3G02730  
 AT3G17880,AT5G39950,AT1G69880,AT1G59730,AT3G51030,AT1G19730,AT5G42980,AT1G45145  
 AT3G53220 Phypa1|25381  
 AT1G11530  
 AT1G31020,AT2G35010 Phypa1|35891  
 AT4G22670 Phypa1|4343  
 AT3G08710,AT3G56420,AT2G40790  
 Phypa1|28102,Phypa1|36889,Phypa1|38333,Phypa1|27431,Phypa1|24902  
 Phypa1|181,Phypa1|28643,Phypa1|37464  
 AT5G13260  
 AT4G25070 Phypa1|34381  
 Phypa1|17076  
 AT4G08630  
 AT5G23700,AT3G48860  
 AT1G76490,AT2G17370 Phypa1|39110,Phypa1|35912,Phypa1|9213  
 Phypa1|21147  
 AT5G20600 Phypa1|34118,Phypa1|37999  
 AT5G01010 Phypa1|36818  
 AT3G51800 Phypa1|37139,Phypa1|35087,Phypa1|27033  
 AT4G16700 Phypa1|27350  
 AT3G07180 Phypa1|35317  
 Phypa1|15144,Phypa1|27387,Phypa1|27996,Phypa1|25561,Phypa1|24979,Phypa1|4954,Phypa1|27371  
 Phypa1|1468,Phypa1|27850,Phypa1|1412,Phypa1|27989,Phypa1|24868  
 AT1G29940 Phypa1|37441  
 Phypa1|2380  
 Phypa1|2383  
 Phypa1|2381  
 AT4G21710 Phypa1|33501  
 AT5G45140 Phypa1|36158  
 AT3G18090,AT3G23780 Phypa1|23709,Phypa1|29403  
 AT1G10600,AT1G48790,AT4G16144 Phypa1|29330,Phypa1|26636,Phypa1|28067  
 AT2G35370,AT1G32470,AT2G35120 Phypa1|24052,Phypa1|37100  
 AT5G08530 Phypa1|24961,Phypa1|29389  
 Phypa1|3962  
 AT5G63460 Phypa1|1187  
 Phypa1|30766  
 AT5G61410 Phypa1|38506,Phypa1|24376,Phypa1|25943  
 AT3G01850,AT1G63290 Phypa1|31562  
 AT3G58130,AT2G27340 Phypa1|29166  
 AT1G76200 Phypa1|31970,Phypa1|882  
 AT5G15540 Phypa1|12028  
 AT1G21190,AT1G76860 Phypa1|36117  
 AT1G76480,AT1G20890 Phypa1|5339  
 AT3G22920 Phypa1|29145,Phypa1|28341,Phypa1|29036  
 Phypa1|26793  
 AT3G63400 Phypa1|26019,Phypa1|29686  
 AT4G33060 Phypa1|28598  
 Phypa1|36598,Phypa1|2648,Phypa1|23937,Phypa1|36437  
 AT4G34960  
 AT4G32420 Phypa1|2347  
 Phypa1|30903  
 AT1G01940 Phypa1|39159  
 Phypa1|5872  
 AT3G62030  
 AT2G38730 Phypa1|34890  
 AT4G38740,AT2G21130,AT2G16600,AT4G34870 Phypa1|35006  
 AT2G36130 Phypa1|23707  
 AT5G13120

AT5G67530 Phypa1|23763  
 Phypa1|1600,Phypa1|26807  
 AT2G15790 Phypa1|39246,Phypa1|38566  
 Phypa1|23928,Phypa1|28861,Phypa1|2324,Phypa1|36861  
 AT3G55920 Phypa1|28137,Phypa1|37251  
 AT3G44600 Phypa1|13411  
 AT3G56070  
 AT5G58710,AT2G29960 Phypa1|25879,Phypa1|37103,Phypa1|30068  
 AT5G11270Phypa1|32031  
 AT2G25910 Phypa1|25560,Phypa1|19331  
 Phypa1|9645  
 AT5G66190,AT1G20020  
 AT1G30510,AT4G05390 Phypa1|15265  
 Phypa1|24193,Phypa1|37220,Phypa1|17879  
 AT4G15470,AT4G14730,AT4G02690,AT1G03070,AT3G63310  
 Phypa1|2776,Phypa1|25431,Phypa1|25544,Phypa1|2453  
 AT5G52280,AT5G41140,AT1G63300 Phypa1|33441,Phypa1|16994  
 AT1G21690 Phypa1|36975  
 AT3G01790 Phypa1|30215  
 AT2G36250,AT3G52750 Phypa1|36904,Phypa1|38811  
 AT5G55280 Phypa1|37067,Phypa1|37834  
 Phypa1|38765  
 AT5G52650,AT4G25740,AT5G41520  
 Phypa1|1622,Phypa1|38893,Phypa1|24040,Phypa1|36448,Phypa1|38713,Phypa1|35750,Phypa1|36142,P  
 hypa1|7509  
 AT1G05180,AT2G32410,AT3G25880 Phypa1|36887,Phypa1|38807  
 AT3G54090 Phypa1|28735  
 AT1G69200  
 AT4G10260,AT1G50390,AT1G06030,AT1G06020,AT2G31390,AT3G59480  
 Phypa1|22135  
 Phypa1|30423  
 AT5G51830,AT1G66430  
 Phypa1|37188,Phypa1|29664,Phypa1|26348,Phypa1|29411,Phypa1|25847,Phypa1|38230,Phypa1|2576,P  
 hypa1|23724  
 AT1G04850,AT5G48690 Phypa1|39637  
 AT5G58250 Phypa1|34920  
 Phypa1|28930,Phypa1|25868,Phypa1|25435  
 AT2G41705 Phypa1|29694,Phypa1|29874  
 AT5G60460,AT2G45070,AT3G60540 Phypa1|368,Phypa1|367,Phypa1|1311  
 AT3G50930,AT3G50940,AT2G18190,AT2G18193,AT5G17750,AT5G17740,AT5G17730,AT5G17760,AT3G29800  
 AT4G05370,AT5G40010,AT3G28580,AT3G28560,AT3G28540,AT3G28510,AT3G28520,AT3G28610,AT3G28600,AT5  
 G40000,AT3G28570,AT2G46620,AT5G57480,AT4G25835,AT4G30250  
 AT1G43910  
 Phypa1|35288,Phypa1|39528,Phypa1|691,Phypa1|19514,Phypa1|12263,Phypa1|28316  
 AT4G05380,AT4G05340 Phypa1|6345,Phypa1|32251  
 AT2G44150,AT3G59960 Phypa1|1454  
 AT4G30860 Phypa1|4048  
 AT2G20020,AT5G54890,AT4G31010,AT1G23400 Phypa1|28400,Phypa1|25986,Phypa1|46  
 Phypa1|25521  
 AT2G40650  
 Phypa1|12839,Phypa1|10073  
 AT1G78070,AT1G36070,AT1G55680,AT3G13340,AT5G56190 Phypa1|25657,Phypa1|30344  
 AT1G63160 Phypa1|24539  
 Phypa1|9473,Phypa1|30905  
 AT4G10320 Phypa1|39292  
 AT4G13050,AT3G25110 Phypa1|27981,Phypa1|24545  
 AT1G08510  
 Phypa1|1904,Phypa1|1009,Phypa1|37151,Phypa1|114  
 Phypa1|27212,Phypa1|37486,Phypa1|14475  
 Phypa1|542,Phypa1|1091,Phypa1|4208  
 Phypa1|25450,Phypa1|25818  
 AT4G10090 Phypa1|30310  
 AT2G22010 Phypa1|6382,Phypa1|24699,Phypa1|400  
 AT3G13300,AT3G13290 Phypa1|37573,Phypa1|39047,Phypa1|20128,Phypa1|36978,Phypa1|24322  
 AT2G42910,AT1G10700 Phypa1|39386,Phypa1|33419  
 AT3G28670 Phypa1|4677,Phypa1|35037  
 AT1G08460 Phypa1|37296  
 AT5G42320 Phypa1|1886  
 AT3G19240,AT4G33400 Phypa1|36993,Phypa1|30704,Phypa1|37946  
 AT4G39680 Phypa1|35138  
 AT5G03660,AT3G09980,AT2G36410,AT3G52920,AT2G27740,AT2G36355,AT3G52900 Phypa1|26541  
 AT5G18590 Phypa1|3465,Phypa1|7442,Phypa1|8298,Phypa1|26145  
 AT3G46200 Phypa1|25618  
 AT5G21050,AT5G64090 Phypa1|34116  
 AT3G16090,AT1G65040 Phypa1|79  
 AT5G30490 Phypa1|34317  
 AT3G08840 Phypa1|24142  
 AT1G10320  
 AT1G27650,AT5G42820 Phypa1|37645,Phypa1|1092  
 AT3G44785  
 Phypa1|30128

AT3G44620 Phypa1|32079,Phypa1|30430,Phypa1|25578  
 AT4G01870,AT1G21680,AT1G21670 Phypa1|29726  
 AT5G15680 Phypa1|24296,Phypa1|13538,Phypa1|30545  
 AT1G78190,AT1G22270 Phypa1|26471  
 AT5G38380 Phypa1|35020  
 AT1G29220 Phypa1|4635,Phypa1|35223  
 AT5G18630,AT5G18640 Phypa1|37366,Phypa1|36609,Phypa1|37259,Phypa1|21380  
 AT4G12620,AT4G14700 Phypa1|27276  
 AT2G45790 Phypa1|37260  
 AT1G61050,AT3G09020,AT5G01250,AT2G38150 Phypa1|1893,Phypa1|39362  
 AT4G34360 Phypa1|36430  
 AT3G44940,AT5G22930,AT2G28140,AT5G59760 Phypa1|708,Phypa1|707  
 Phypa1|31163  
 AT5G08670,AT5G08690,AT5G08680  
 Phypa1|29904,Phypa1|39173,Phypa1|14478  
 Phypa1|31474  
 Phypa1|31044  
 AT3G04020 Phypa1|30411  
 AT3G59410 Phypa1|28443  
 AT3G54010 Phypa1|36945  
 AT1G44446 Phypa1|29189,Phypa1|29766  
 AT5G62600 Phypa1|33137  
 Phypa1|34384  
 AT2G32090 Phypa1|36722  
 AT1G15410 Phypa1|31479  
 AT3G19800 Phypa1|34338  
 AT4G27540 Phypa1|12063,Phypa1|6500  
 AT2G35035 Phypa1|32780  
 AT2G30500,AT5G58320,AT3G10880,AT5G05180,AT4G14760,AT3G22790,AT4G02710,AT1G03080  
 Phypa1|18159,Phypa1|8563  
 Phypa1|16415  
 AT5G04260,AT5G06690 Phypa1|30252,Phypa1|328  
 AT4G14723,AT3G22820,AT2G30370  
 Phypa1|14029,Phypa1|18142,Phypa1|32298,Phypa1|5583,Phypa1|7884,Phypa1|31914,Phypa1|16097  
 AT3G21060 Phypa1|13992,Phypa1|2686  
 AT5G24840 Phypa1|28865  
 AT1G10740,AT1G23330 Phypa1|32420,Phypa1|6267,Phypa1|36263  
 AT5G23880 Phypa1|38411  
 AT5G52540,AT5G24000  
 Phypa1|1867  
 Phypa1|34002  
 AT2G38840  
 Phypa1|24525,Phypa1|27860  
 Phypa1|27476  
 AT1G73230,AT1G17880 Phypa1|38400,Phypa1|35840,Phypa1|38024,Phypa1|2138  
 AT2G42130,AT3G58010 Phypa1|30219  
 AT3G58460 Phypa1|36666  
 AT3G62560,AT4G02080,AT1G09180,AT1G56330,AT1G02620  
 Phypa1|38188,Phypa1|37496,Phypa1|38547,Phypa1|2430  
 AT1G29840,AT3G47560,AT3G47590,AT2G19550,AT5G11910 Phypa1|6546,Phypa1|2450  
 AT5G54110,AT4G21450,AT4G05060 Phypa1|34299,Phypa1|38311,Phypa1|39480,Phypa1|25558  
 AT1G80420 Phypa1|10866,Phypa1|17046  
 AT3G56570 Phypa1|25785  
 AT2G26340 Phypa1|35476  
 AT3G29970,AT3G48140 Phypa1|24213,Phypa1|39459,Phypa1|2570,Phypa1|2227  
 Phypa1|865,Phypa1|866  
 Phypa1|318  
 AT3G15270,AT1G53160  
 AT1G20980,AT1G76580  
 Phypa1|1299  
 Phypa1|16297  
 Phypa1|32620,Phypa1|34841  
 AT5G58510  
 AT5G05610,AT3G11200,AT5G20510,AT3G42790,AT5G26210,AT2G02470,AT1G14510  
 Phypa1|38901,Phypa1|29526,Phypa1|30307,Phypa1|25931,Phypa1|26335,Phypa1|26032,Phypa1|12732  
 AT2G19540 Phypa1|26164  
 AT2G44860 Phypa1|39620,Phypa1|781  
 AT3G52100,AT3G08020 Phypa1|31699,Phypa1|34455,Phypa1|34456  
 AT1G09760 Phypa1|643,Phypa1|38590,Phypa1|34154  
 AT1G03910 Phypa1|37847  
 AT5G65450,AT4G24560  
 AT5G57990  
 Phypa1|10215  
 Phypa1|25638,Phypa1|28110  
 Phypa1|17379,Phypa1|1422  
 AT5G46740,AT4G17895 Phypa1|27857,Phypa1|1040,Phypa1|1036  
 AT4G31670,AT2G24640 Phypa1|28705,Phypa1|441  
 AT4G30890 Phypa1|37189  
 AT3G14400 Phypa1|1415  
 AT1G17110  
 AT1G75120,AT1G75110,AT1G19360 Phypa1|39437,Phypa1|30226,Phypa1|17017  
 AT5G36280,AT1G65290,AT2G44620

Phypa1|24185,Phypa1|39189,Phypa1|24169,Phypa1|23695,Phypa1|23801  
AT5G47630 Phypa1|17790  
AT4G01897 Phypa1|24205  
AT5G56750,AT2G19620,AT5G11790  
Phypa1|39605,Phypa1|37358,Phypa1|24013,Phypa1|37873,Phypa1|29137,Phypa1|30399,Phypa1|37264  
AT2G20700,AT4G28280,AT5G56170  
Phypa1|18366,Phypa1|35143,Phypa1|35882,Phypa1|5521,Phypa1|9890  
AT4G39920 Phypa1|27614  
AT4G14000,AT2G43320 Phypa1|27749,Phypa1|38549  
AT2G37500 Phypa1|23598,Phypa1|38871  
AT2G27920 Phypa1|29497  
AT3G01020,AT4G04080,AT4G22220 Phypa1|30965,Phypa1|2145,Phypa1|2147  
AT4G12610 Phypa1|15591,Phypa1|2249  
AT1G35420 Phypa1|16284,Phypa1|25656  
AT1G14520,AT5G56640,AT4G26260,AT2G19800 Phypa1|2747  
AT4G28025 Phypa1|796  
AT5G49130  
AT2G34360,AT5G52450,AT1G73700  
Phypa1|36730,Phypa1|24210,Phypa1|1868,Phypa1|38388,Phypa1|2631,Phypa1|14071,Phypa1|24985,Phypa1|28722,Phypa1|26773  
AT1G15180,AT1G15170,AT1G15150,AT1G15160,AT1G71140,AT1G64820,AT1G66780,AT1G66760,AT2G04070,AT2G04050,AT2G04040,AT2G04066,AT2G04080,AT2G04090,AT2G04100  
AT1G58340,AT4G23030,AT5G52050,AT5G19700,AT4G29140,AT2G38510  
AT1G71870 Phypa1|36346,Phypa1|39025,Phypa1|2934,Phypa1|491  
AT3G23550,AT3G23560  
AT4G25640,AT4G00350,AT5G38030,AT3G26590,AT1G12950,AT1G23300,AT1G47530,AT5G65380,AT5G44050,AT5G10420,AT1G33100,AT1G33110,AT1G33090,AT1G33080,AT3G03620,AT5G17700,AT3G21690,AT4G21900,AT4G21910,AT1G11670,AT1G61890,AT3G59030  
AT4G22790  
AT1G05720 Phypa1|39609  
AT5G58030 Phypa1|35096,Phypa1|39560  
AT4G33360 Phypa1|37587  
AT2G45000 Phypa1|33741  
AT2G22830,AT4G37760 Phypa1|39555  
AT5G24155,AT5G24160,AT5G24150,AT5G24140  
AT1G58440  
Phypa1|26999,Phypa1|27009  
AT4G37130 Phypa1|10076  
AT3G53800,AT5G02150,AT3G09350 Phypa1|2722,Phypa1|37363  
Phypa1|31329  
AT1G14810 Phypa1|29546  
AT4G22960,AT4G11860 Phypa1|34531  
AT2G16860 Phypa1|25211  
AT5G19370 Phypa1|28471  
AT5G64610,AT5G09740 Phypa1|14658,Phypa1|24327,Phypa1|24977  
AT1G80440,AT1G15670,AT2G44130,AT3G59940  
Phypa1|1942,Phypa1|159,Phypa1|34732,Phypa1|30509,Phypa1|23671,Phypa1|1941,Phypa1|24008,Phypa1|25377  
AT4G30550,AT2G23970,AT2G23960,AT4G30530,AT4G30540 Phypa1|15647  
AT4G36210,AT2G18100 Phypa1|15379,Phypa1|20648,Phypa1|416  
AT4G14890 Phypa1|30191  
AT1G10960,AT1G60950  
Phypa1|37308,Phypa1|39146,Phypa1|37309,Phypa1|39669,Phypa1|37319,Phypa1|26649  
AT5G10000  
AT2G27510 Phypa1|26177,Phypa1|26206  
Phypa1|3370  
AT1G79350  
Phypa1|2490  
AT2G24970 Phypa1|799  
AT3G53900 Phypa1|28030  
AT4G03030 Phypa1|1019  
AT5G27620 Phypa1|29544,Phypa1|26362  
AT5G13240 Phypa1|34681,Phypa1|32354  
AT5G44450 Phypa1|36042  
AT1G08280 Phypa1|18303,Phypa1|9571,Phypa1|17994  
AT5G23710 Phypa1|31796  
AT1G75210 Phypa1|30173,Phypa1|26504  
AT5G38660 Phypa1|29637  
Phypa1|22860  
AT5G26120,AT3G10740  
Phypa1|29974,Phypa1|2783  
AT2G22570 Phypa1|25234  
AT1G51560,AT3G21140 Phypa1|25680,Phypa1|29850  
Phypa1|2979  
Phypa1|30352  
AT3G53730  
AT1G07820  
Phypa1|2725  
Phypa1|27465  
Phypa1|27791  
Phypa1|2772  
Phypa1|37786

Phypa1|14899  
AT1G07660  
AT3G45930  
Phypa1|29591  
AT5G59690  
Phypa1|28057  
AT2G28740 Phypa1|30194  
AT3G46320  
AT5G59970  
Phypa1|34573  
Phypa1|2492  
AT4G32620 Phypa1|10207,Phypa1|31755  
AT3G04240 Phypa1|37475,Phypa1|37790  
AT1G18730 Phypa1|27958  
AT3G24800 Phypa1|38778,Phypa1|37267,Phypa1|39066,Phypa1|30271,Phypa1|122  
AT3G45880 Phypa1|38413  
AT1G34150 Phypa1|16735  
AT3G21865 Phypa1|36221,Phypa1|36222  
AT5G02270 Phypa1|39207  
AT1G03905,AT5G44110 Phypa1|36354  
Phypa1|13963  
AT2G06210 Phypa1|36223  
AT1G16810 Phypa1|1725,Phypa1|26460  
AT3G54660 Phypa1|24970  
AT3G24170 Phypa1|39008  
AT5G18660 Phypa1|13020,Phypa1|37246  
Phypa1|21166  
AT3G21640 Phypa1|11586,Phypa1|39644  
AT3G12940 Phypa1|4167,Phypa1|28614,Phypa1|26992,Phypa1|26490  
AT5G56930 Phypa1|35616  
AT4G39120 Phypa1|38538,Phypa1|27892,Phypa1|28320  
AT1G04650 Phypa1|10649  
AT4G27340 Phypa1|1792  
AT4G21105Phypa1|30982  
AT1G77300  
AT1G76710 Phypa1|25507  
Phypa1|276  
AT5G40280 Phypa1|27941  
AT1G09590,AT1G09690,AT1G57660,AT1G57860  
Phypa1|35280,Phypa1|38875,Phypa1|31512,Phypa1|23902  
AT5G10910 Phypa1|30933,Phypa1|1866  
AT4G08920,AT1G04400 Phypa1|24435,Phypa1|24416  
Phypa1|31045  
Phypa1|23142  
AT3G24080 Phypa1|33496  
AT2G18830,AT3G15010 Phypa1|2017,Phypa1|1957  
Phypa1|1899  
AT2G22100,AT2G22090,AT3G56860,AT2G41060  
AT2G02050 Phypa1|37145,Phypa1|38729  
AT5G63440 Phypa1|24504,Phypa1|39027,Phypa1|220  
AT5G42950 Phypa1|35074,Phypa1|9891,Phypa1|34107  
AT5G54440 Phypa1|3308,Phypa1|24686  
AT3G57650,AT1G51260 Phypa1|4782,Phypa1|26842,Phypa1|19771  
AT2G23420,AT4G36940 Phypa1|30463,Phypa1|30390  
AT1G21580 Phypa1|17401  
AT1G21570 Phypa1|32310  
AT4G35050,AT2G16780,AT5G58230 Phypa1|31803  
AT3G44830,AT5G13640 Phypa1|39607  
Phypa1|226  
AT2G36610 Phypa1|210  
AT3G61890,AT2G46680,AT2G18550,AT4G36740,AT5G66700,AT5G53980,AT1G27050,AT5G03790,AT3G01470,AT1  
G69780,AT1G26960,AT5G15150,AT3G01220,AT4G40060,AT2G22430,AT5G65310  
Phypa1|30657,Phypa1|25627,Phypa1|200,Phypa1|198,Phypa1|8982,Phypa1|13980,Phypa1|37064,Phypa  
1|27382,Phypa1|30082,Phypa1|25729,Phypa1|26637,Phypa1|213,Phypa1|209,Phypa1|35980,Phypa1|203  
AT3G61690 Phypa1|13042,Phypa1|34012  
AT3G51620,AT2G40520,AT3G56320 Phypa1|12956  
AT2G36895 Phypa1|25029  
AT1G19690 Phypa1|28684  
AT3G12100 Phypa1|38318  
AT5G50430,AT1G17280 Phypa1|35571  
Phypa1|16161,Phypa1|1070,Phypa1|14722  
AT5G52660  
Phypa1|34231  
AT5G02840,AT3G09600  
AT4G01280,AT1G01520  
AT1G66080 Phypa1|17588,Phypa1|32965,Phypa1|28182,Phypa1|26182  
AT1G68070,AT2G01735  
Phypa1|27986  
AT1G63170,AT1G12760,AT4G11680 Phypa1|1043,Phypa1|39685  
AT3G55530 Phypa1|33926,Phypa1|36934  
AT3G61180  
AT2G04240,AT1G15100,AT2G01150

AT4G26580,AT5G55970  
AT3G51325  
AT3G04770,AT1G72370  
Phypa1|2475,Phypa1|37608,Phypa1|23798,Phypa1|26501,Phypa1|1991,Phypa1|28998  
AT5G14590,AT1G54340,AT1G65930 Phypa1|20353,Phypa1|17537,Phypa1|39431  
AT2G42400 Phypa1|37659,Phypa1|38978,Phypa1|19808  
Phypa1|38977  
AT1G28520  
AT5G49570 Phypa1|30172  
AT5G16680,AT3G02890,AT1G43770,AT4G17850,AT5G61100 Phypa1|10370  
AT1G75390,AT4G34590,AT2G18160,AT3G62420,AT5G49450,AT4G37730,AT2G22850,AT3G49760  
Phypa1|1609  
AT3G60440,AT3G60430,AT3G60450,AT3G60420 Phypa1|27641  
AT5G46020 Phypa1|32533  
AT2G23360  
Phypa1|608,Phypa1|29178,Phypa1|26238,Phypa1|37266,Phypa1|612,Phypa1|174  
Phypa1|6421  
AT1G19835,AT1G47900,AT2G24470,AT4G36120  
Phypa1|610  
AT1G21810,AT1G77580,AT3G05270 Phypa1|37018,Phypa1|15781  
AT5G39790 Phypa1|1967,Phypa1|32522  
AT1G33230,AT4G10430 Phypa1|27254,Phypa1|35557,Phypa1|28941,Phypa1|38932  
AT1G29820,AT1G29830,AT2G42950 Phypa1|27092,Phypa1|36828,Phypa1|25553  
AT1G67280  
Phypa1|2972,Phypa1|27596  
Phypa1|26394,Phypa1|26850  
AT1G11840  
AT3G55280,AT2G39460 Phypa1|39143,Phypa1|38565,Phypa1|38127,Phypa1|2122  
AT1G22860 Phypa1|13217,Phypa1|36554  
Phypa1|24305  
AT1G09160,AT1G68410,AT1G47380 Phypa1|25548  
Phypa1|29860,Phypa1|25926,Phypa1|24434,Phypa1|24865  
Phypa1|26319  
AT1G73000,AT2G26040,AT4G17870,AT5G46790,AT5G45860,AT5G45870,AT4G18620,AT2G40330,AT2G38310,AT5  
G05440,AT5G53160,AT4G01026,AT1G01360,AT4G27920  
Phypa1|38610,Phypa1|39403,Phypa1|27391,Phypa1|31501,Phypa1|37684,Phypa1|38862  
Phypa1|21229  
Phypa1|21624  
AT3G14067  
Phypa1|4839  
Phypa1|26978,Phypa1|17281  
AT2G39850  
AT5G67090  
AT5G45640,AT5G45650 Phypa1|2935  
AT5G67360,AT5G51750,AT2G05920  
AT5G59110  
AT1G01900  
AT5G59810,AT2G04160  
AT4G20430,AT5G44530,AT1G30600  
Phypa1|9565  
AT1G32980  
AT4G05330,AT4G21160 Phypa1|28811,Phypa1|2593,Phypa1|39500  
Phypa1|11922  
AT5G47710,AT2G01540,AT1G70790,AT1G70800,AT1G70810,AT1G23140,AT3G17980,AT1G48590,AT1G73580,AT5  
G37740,AT1G66360  
AT3G07940  
AT1G20160,AT1G20150  
AT4G10520,AT4G10530,AT4G10510,AT4G10540,AT4G10550,AT1G32950,AT1G32960,AT1G32940,AT1G32970,AT4  
G21640,AT4G21630,AT4G21650,AT1G66210,AT1G66220,AT4G21326,AT5G11940,AT4G21323,AT4G26330  
AT1G04110  
AT4G30020,AT2G19170 Phypa1|27692,Phypa1|27802,Phypa1|31645  
Phypa1|14555  
AT1G62340  
AT3G14240,AT4G34980 Phypa1|34326,Phypa1|25227,Phypa1|38392  
Phypa1|2677,Phypa1|26209,Phypa1|24713  
AT4G00230,AT5G03620,AT5G58820,AT5G58830,AT5G58840,AT5G59090,AT5G59120,AT5G59130,AT3G46840,AT3  
G46850,AT5G59100,AT5G59190,AT4G15040 Phypa1|36758  
AT1G04620 Phypa1|27919  
AT1G72500,AT1G19110 Phypa1|27957,Phypa1|26365,Phypa1|11967  
AT4G10920,AT4G00980 Phypa1|29659  
AT4G31740,AT2G17980 Phypa1|20496,Phypa1|28775  
AT2G44310,AT1G54530 Phypa1|14906  
AT1G27310,AT1G27970,AT1G11570 Phypa1|38774,Phypa1|23912,Phypa1|24869  
AT5G53120  
Phypa1|30852  
AT1G70310,AT1G23820 Phypa1|38183,Phypa1|25453,Phypa1|2963  
AT4G03200 Phypa1|38370  
Phypa1|29507,Phypa1|28517  
AT5G61430,AT5G07680,AT3G29035,AT5G39610  
AT3G18400,AT5G53950,AT3G15170  
AT1G71930  
Phypa1|1614



AT1G01720,AT1G77450,AT5G08790,AT5G63790  
AT1G34180,AT1G34190,AT1G32870  
Phypa1|28437  
Phypa1|28513  
Phypa1|26114  
AT1G32770,AT2G46770,AT3G61910  
Phypa1|2220,Phypa1|26784,Phypa1|2167,Phypa1|28479,Phypa1|37674,Phypa1|28932  
Phypa1|2349,Phypa1|15582,Phypa1|2350,Phypa1|33722  
Phypa1|29506,Phypa1|27787,Phypa1|28516,Phypa1|25099  
AT1G12260,AT1G62700,AT5G62380  
AT1G69490  
AT1G52880,AT3G15510  
Phypa1|2162  
AT5G46590,AT4G17980,AT1G32510,AT4G01540,AT4G01520,AT4G01550,AT3G04430,AT3G44290,AT5G22290,AT2  
G27300,AT1G33060,AT4G35580,AT5G24590,AT3G49530  
AT3G04070  
AT2G18060,AT4G36160,AT5G66300  
AT1G52890,AT3G15500,AT4G27410  
Phypa1|24840  
AT5G04410,AT3G10500 Phypa1|698,Phypa1|1135  
AT5G64060,AT5G09330  
Phypa1|29685  
AT5G18270,AT3G04060 Phypa1|29512  
AT3G56520,AT5G41090,AT3G56530,AT1G64105,AT5G18300,AT1G19040,AT3G04420,AT1G02220,AT1G02250,AT1  
G01010,AT1G03490,AT3G12910,AT3G12977,AT5G64530,AT5G14000,AT5G22380,AT3G44350,AT5G50820,AT2G17  
040,AT2G02450,AT2G43000,AT1G26870,AT5G39820,AT5G13180,AT2G33480  
Phypa1|30101  
AT1G61110Phypa1|28168,Phypa1|24598  
AT1G76420  
AT4G10350,AT1G33280  
AT3G10480,AT3G10490,AT5G04400,AT4G28530,AT1G56010  
AT1G65910,AT3G03200,AT5G17260,AT3G17730,AT1G54330  
AT2G24430 Phypa1|36476,Phypa1|29765,Phypa1|29224  
AT1G79580  
AT2G22425,AT4G40042 Phypa1|3179,Phypa1|357,Phypa1|2393  
AT2G41120Phypa1|1114  
AT5G52780,AT4G19100 Phypa1|286  
AT2G13360 Phypa1|38039,Phypa1|36150,Phypa1|26275,Phypa1|38653,Phypa1|31201  
AT5G62650 Phypa1|33265  
AT2G29570,AT1G07370 Phypa1|37696,Phypa1|32782  
AT1G24340 Phypa1|30952,Phypa1|22  
AT4G08950,AT1G35140,AT5G09440,AT5G64260 Phypa1|2655,Phypa1|24978,Phypa1|24627,Phypa1|28739  
Phypa1|1494,Phypa1|30801,Phypa1|25765,Phypa1|1990,Phypa1|1486,Phypa1|1487,Phypa1|1470,Phypa  
1|1978  
AT2G17230,AT2G35150,AT5G51550 Phypa1|27902,Phypa1|38870,Phypa1|27575  
AT3G02970 Phypa1|2940  
AT5G03030,AT3G09700,AT2G35795 Phypa1|23951  
Phypa1|30882  
AT5G11480  
AT2G22870 Phypa1|25866,Phypa1|16373  
AT2G26240,AT3G43520 Phypa1|28126  
Phypa1|25117  
AT2G02810,AT1G14360 Phypa1|7928,Phypa1|30645,Phypa1|26555,Phypa1|25589  
AT2G25730 Phypa1|37068  
Phypa1|2223  
Phypa1|2224  
Phypa1|21410  
AT1G08760,AT3G19610,AT2G31920,AT4G13370,AT1G70340,AT1G23790,AT3G14170  
Phypa1|34113,Phypa1|4116  
Phypa1|2222  
AT5G20080 Phypa1|24958  
AT5G17770 Phypa1|39213,Phypa1|26621  
Phypa1|25043  
AT1G67080 Phypa1|27389,Phypa1|27634  
Phypa1|26932,Phypa1|1952,Phypa1|28914  
AT1G67230,AT1G13220,AT1G68790  
AT5G65770 Phypa1|21429,Phypa1|18540  
AT3G11980,AT3G56700,AT3G60060,AT4G33790,AT3G44550,AT3G44560,AT5G22500,AT3G44540,AT5G22420  
Phypa1|25643,Phypa1|440,Phypa1|15526  
AT3G20890,AT5G66010 Phypa1|30796  
Phypa1|28302  
Phypa1|30915  
AT5G57960  
AT5G61740,AT5G61700,AT3G47760,AT3G47750,AT3G47770,AT3G47780,AT3G47740,AT3G47790  
Phypa1|29569,Phypa1|29279,Phypa1|36472,Phypa1|37302  
Phypa1|23312,Phypa1|20557  
Phypa1|30025,Phypa1|31220  
Phypa1|31031  
AT5G61690,AT5G61730,AT3G47730 Phypa1|37349  
AT2G41700 Phypa1|39369  
Phypa1|22818,Phypa1|22049  
Phypa1|21948

Phypa1|30604  
 Phypa1|23195,Phypa1|31254,Phypa1|30732,Phypa1|30909  
 Phypa1|31302,Phypa1|31162  
 AT3G63100 Phypa1|30857  
 AT3G58810,AT3G61940,AT2G46800 Phypa1|2775  
 Phypa1|25586  
 AT2G29410  
 AT1G64510 Phypa1|25391,Phypa1|30274  
 AT4G17600,AT5G47110 Phypa1|215,Phypa1|1112,Phypa1|2061  
 AT5G37560,AT2G21420,AT2G25380,AT3G45470,AT2G25370,AT2G25360,AT5G60250,AT3G45500,AT3G45490,AT3  
 G45525,AT2G16520,AT3G45480,AT3G45510,AT3G43180,AT3G45560,AT3G45460,AT3G45580,AT3G45570,AT3G43  
 750,AT3G45555,AT3G45540,AT2G26135,AT2G26130,AT5G07640,AT2G19610 Phypa1|695  
 AT3G53690,AT3G14250,AT2G22940 Phypa1|25059,Phypa1|26625,Phypa1|28467  
 AT1G80500 Phypa1|34145  
 AT1G02100 Phypa1|25000  
 AT2G22250 Phypa1|26613  
 AT1G23230 Phypa1|26398  
 AT2G36590,AT2G39890,AT3G55740 Phypa1|28053,Phypa1|39306  
 AT1G54150 Phypa1|25088,Phypa1|24154  
 AT5G47890 Phypa1|28387,Phypa1|31715  
 AT1G69340 Phypa1|39329,Phypa1|25870  
 AT1G63770 Phypa1|38869,Phypa1|39352,Phypa1|28306  
 AT5G52200 Phypa1|9726,Phypa1|33487  
 Phypa1|17552  
 AT4G11640Phypa1|16679,Phypa1|28692  
 AT4G17650 Phypa1|2025,Phypa1|30319  
 AT4G38630 Phypa1|31870  
 AT5G22340 Phypa1|34951  
 AT3G16560 Phypa1|1845,Phypa1|39416  
 AT5G02400,AT3G09400,AT2G28890,AT1G07630  
 AT2G35350  
 AT2G46920 Phypa1|39699,Phypa1|38630  
 AT4G04930 Phypa1|2634  
 AT1G03280,AT4G20340,AT4G20810 Phypa1|7569,Phypa1|23815  
 AT3G04820 Phypa1|25221  
 AT4G27390 Phypa1|34475  
 AT2G42710 Phypa1|33615  
 AT3G63490 Phypa1|546,Phypa1|34572,Phypa1|1041  
 AT5G11450Phypa1|26384  
 AT3G61980,AT4G01575 Phypa1|34860,Phypa1|33300,Phypa1|15529,Phypa1|35235,Phypa1|33429  
 AT2G35610 Phypa1|26160  
 AT4G13140 Phypa1|27496  
 AT2G29990,AT1G07180 Phypa1|36262,Phypa1|37143  
 AT1G44835 Phypa1|6788  
 AT4G28370,AT2G20650 Phypa1|30322,Phypa1|36152  
 Phypa1|17505,Phypa1|15742,Phypa1|14812,Phypa1|6881,Phypa1|14584  
 Phypa1|32216  
 AT3G03970  
 AT1G54385  
 AT2G17410,AT1G76510,AT1G20910 Phypa1|479,Phypa1|26665  
 AT5G42370 Phypa1|26628  
 AT3G02990,AT5G16820  
 AT3G24520  
 AT3G22830,AT3G63350,AT3G51910  
 AT1G32330,AT4G17750  
 Phypa1|1901,Phypa1|38435,Phypa1|24035,Phypa1|38834  
 AT5G43840  
 AT4G11660,AT5G62020,AT2G41690  
 Phypa1|1702  
 AT1G46264 Phypa1|1700  
 AT4G36990  
 AT1G67970  
 AT5G03720  
 Phypa1|38224,Phypa1|27151  
 AT2G26150  
 AT4G19630,AT1G77570,AT4G18870,AT5G45710,AT4G18880,AT4G13980  
 AT5G54070  
 AT5G57230 Phypa1|37751  
 AT1G21760 Phypa1|38896  
 AT1G30000 Phypa1|38647  
 AT3G21160,AT1G51590 Phypa1|38071,Phypa1|5000  
 AT1G07130 Phypa1|26136  
 AT1G62710,AT2G25940,AT4G32940,AT3G20210 Phypa1|27743,Phypa1|25144,Phypa1|3047,Phypa1|36371  
 AT4G08320,AT4G12400,AT1G12270,AT1G62740 Phypa1|20797  
 AT4G17880,AT5G46760,AT1G32640,AT5G46830,AT4G00870  
 Phypa1|8993,Phypa1|28014,Phypa1|2203,Phypa1|3811  
 AT1G01260,AT2G46510,AT4G16430 Phypa1|33336,Phypa1|31601,Phypa1|33338,Phypa1|24890  
 AT2G22760,AT2G22770,AT2G22750,AT4G37850 Phypa1|32676,Phypa1|32359  
 AT2G28160,AT1G10610 Phypa1|33920,Phypa1|3264,Phypa1|4963,Phypa1|9990  
 AT4G21330 Phypa1|25648  
 Phypa1|3726  
 AT5G53050 Phypa1|29396

AT3G63300,AT4G14740,AT3G22810,AT5G43870,AT5G47440,AT4G17350,AT4G16670,AT4G32780,AT4G32785,AT5  
G57770 Phypa1|2881  
AT1G55000 Phypa1|25071  
AT4G10180 Phypa1|2993,Phypa1|37718,Phypa1|27032  
AT3G22660 Phypa1|36555  
AT1G10200,AT3G55770,AT2G39900,AT3G61230,AT2G45800,AT1G01780  
Phypa1|39095,Phypa1|10560,Phypa1|26639  
AT1G12650 Phypa1|16444  
AT3G04520,AT1G08630 Phypa1|37025  
Phypa1|21734  
Phypa1|20888,Phypa1|21732,Phypa1|21377  
Phypa1|2042  
Phypa1|28029  
Phypa1|25663  
Phypa1|10770  
AT1G79700,AT1G16060  
AT4G37750 Phypa1|37219  
Phypa1|26676  
Phypa1|9832  
AT3G54320  
AT5G67180,AT4G36920,AT2G28550  
AT5G10510,AT5G65510  
Phypa1|29523  
AT3G20840,AT1G51190  
AT2G41710 Phypa1|26852  
AT5G57390 Phypa1|26674  
AT3G54990,AT2G39250,AT5G60120  
Phypa1|11766  
Phypa1|1083  
Phypa1|29801  
AT1G72570  
AT5G17430  
AT2G41530 Phypa1|26561  
AT2G18250 Phypa1|6894,Phypa1|31553  
AT4G29560 Phypa1|31829  
AT2G39970 Phypa1|27266,Phypa1|29673,Phypa1|19037,Phypa1|29442  
AT1G07320 Phypa1|660,Phypa1|658,Phypa1|25122  
AT1G15440 Phypa1|4568,Phypa1|38850  
AT2G38025 Phypa1|28995  
Phypa1|26433,Phypa1|38767,Phypa1|2215  
AT3G57810 Phypa1|1466  
AT5G20040  
Phypa1|18534,Phypa1|35482,Phypa1|9488,Phypa1|4856,Phypa1|21116,Phypa1|13670,Phypa1|33628  
AT2G06005,AT5G20580 Phypa1|31656,Phypa1|30979  
AT3G23620 Phypa1|17951,Phypa1|23708  
AT1G01090 Phypa1|39585,Phypa1|39308  
AT1G59900,AT1G24180 Phypa1|23819,Phypa1|37585,Phypa1|26172  
Phypa1|2896  
AT3G17000 Phypa1|30555  
AT1G77680 Phypa1|22528,Phypa1|37424  
AT2G26350 Phypa1|37679  
AT1G50950,AT3G20560,AT4G27080 Phypa1|38457  
AT2G34250,AT1G29310,AT1G78720 Phypa1|39587,Phypa1|38984  
AT1G03520,AT4G03340,AT1G71070,AT3G24040,AT2G37585,AT5G39990,AT5G15050,AT1G53100,AT3G15350,AT4  
G27480,AT3G03690 Phypa1|28309,Phypa1|19599,Phypa1|36928,Phypa1|28590,Phypa1|24084,Phypa1|34980  
AT3G55600,AT1G54110 Phypa1|25459  
AT5G53045 Phypa1|29610  
AT5G20660 Phypa1|2588,Phypa1|27557  
AT1G07830 Phypa1|8217,Phypa1|36705  
AT2G40550 Phypa1|35498  
AT3G14080,AT1G19120 Phypa1|28198,Phypa1|32787  
AT5G23540 Phypa1|36480,Phypa1|37324,Phypa1|2909  
Phypa1|30251  
AT1G30520 Phypa1|26308  
Phypa1|21562  
AT4G05160 Phypa1|24646,Phypa1|38608,Phypa1|25927,Phypa1|24910  
AT1G20490,AT1G20500  
AT1G62940 Phypa1|11558,Phypa1|30086  
Phypa1|30601  
Phypa1|31108,Phypa1|31020  
AT1G20510,AT1G20480,AT5G38120  
AT1G51680,AT3G21240,AT3G21230,AT1G65060  
Phypa1|15703,Phypa1|28542,Phypa1|23721,Phypa1|36766  
Phypa1|22581  
AT3G48990 Phypa1|25196  
AT4G19010  
AT5G63380  
AT3G16170 Phypa1|25917,Phypa1|37465  
AT1G09932,AT1G09935,AT5G64460,AT2G17280,AT1G58280  
Phypa1|27279,Phypa1|37051,Phypa1|32687,Phypa1|27887  
Phypa1|11239,Phypa1|24288,Phypa1|7732,Phypa1|30560  
AT1G14430,AT3G57620,AT1G75620,AT1G19900

AT1G67290,AT5G19580 Phypa1|38226,Phypa1|13989  
Phypa1|38633,Phypa1|34632,Phypa1|4404,Phypa1|32503,Phypa1|23968,Phypa1|25826,Phypa1|22416,Phypa1|37136,Phypa1|29095,Phypa1|37451,Phypa1|21468,Phypa1|38733,Phypa1|22731,Phypa1|24019,Phypa1|30135,Phypa1|16247,Phypa1|38334,Phypa1|39251,Phypa1|36619,Phypa1|36548,Phypa1|24276,Phypa1|28304,Phypa1|26093,Phypa1|38417,Phypa1|11468,Phypa1|20304,Phypa1|25497  
Phypa1|11331,Phypa1|27401  
AT3G53950 Phypa1|37314,Phypa1|2641,Phypa1|36829,Phypa1|2961  
Phypa1|31282  
AT3G14990,AT1G53280  
AT4G34020 Phypa1|26104,Phypa1|2670  
AT5G37340,AT5G22480 Phypa1|8223,Phypa1|33474  
AT3G24830,AT3G07110,AT4G13170,AT5G48760  
Phypa1|37419,Phypa1|39232,Phypa1|36806,Phypa1|36680,Phypa1|23864  
AT2G18950 Phypa1|26945,Phypa1|25645,Phypa1|24479  
AT5G11340Phypa1|36544  
AT2G43030 Phypa1|31410  
Phypa1|14020,Phypa1|2812  
Phypa1|23336,Phypa1|19459  
AT4G36700,AT2G18540,AT5G54410 Phypa1|35268  
Phypa1|7861  
AT5G25870 Phypa1|6987,Phypa1|15452  
AT5G51220 Phypa1|24758  
AT5G10050,AT5G65205 Phypa1|37147,Phypa1|36291  
Phypa1|31153  
AT1G10310  
Phypa1|30047  
Phypa1|3039  
Phypa1|23075  
Phypa1|30819,Phypa1|31130,Phypa1|30803,Phypa1|20914,Phypa1|30845  
Phypa1|30939,Phypa1|31077  
AT1G52340,AT3G29250,AT3G29260,AT2G47130,AT2G47120,AT2G47140,AT2G47150,AT3G51680,AT3G42960,AT3G26760,AT3G26770,AT4G03140 Phypa1|38203,Phypa1|26404  
Phypa1|30935,Phypa1|22767  
Phypa1|30029,Phypa1|30605  
Phypa1|2370  
Phypa1|31143  
Phypa1|28589  
Phypa1|30044,Phypa1|30014,Phypa1|30002,Phypa1|23309,Phypa1|31468,Phypa1|29992  
AT3G03980,AT5G18210,AT3G04000,AT4G13180  
Phypa1|23247,Phypa1|30756,Phypa1|26819,Phypa1|31402  
Phypa1|31322  
Phypa1|2361,Phypa1|3010  
Phypa1|23584  
Phypa1|31392,Phypa1|31091  
AT1G62610,AT1G63380,AT3G55290,AT3G55310,AT3G46170,AT2G17845 Phypa1|38527  
Phypa1|25709,Phypa1|37076  
Phypa1|30438,Phypa1|30851,Phypa1|30842,Phypa1|15235,Phypa1|30928  
Phypa1|3092  
AT3G05260,AT1G54870 Phypa1|24658,Phypa1|24507  
AT3G23580,AT5G40942,AT3G27060 Phypa1|27545,Phypa1|26010,Phypa1|16782  
AT3G19230,AT3G05990 Phypa1|17647  
AT5G15380,AT5G14620,AT3G17310 Phypa1|27555,Phypa1|29609  
AT4G31120Phypa1|37931,Phypa1|39205  
AT3G59780 Phypa1|33183  
Phypa1|3700,Phypa1|11108,Phypa1|20513  
AT4G11410,AT4G23430,AT4G23420,AT5G02540,AT2G37540 Phypa1|30170,Phypa1|37564,Phypa1|26253  
Phypa1|30833,Phypa1|28492  
AT5G04070,AT5G15940 Phypa1|29866  
AT4G24050,AT1G64590,AT5G50130  
AT4G09750 Phypa1|32329  
Phypa1|31349,Phypa1|30052  
AT3G25480,AT4G01050 Phypa1|819,Phypa1|39026,Phypa1|820  
AT3G58800 Phypa1|7351,Phypa1|28959  
AT1G73930 Phypa1|32781,Phypa1|17131  
AT1G16705 Phypa1|20759  
AT1G79000,AT1G16710,AT1G55970,AT3G12980,AT1G67220 Phypa1|399  
Phypa1|3  
Phypa1|16400  
AT2G17510 Phypa1|10627  
AT3G55010 Phypa1|26358,Phypa1|26831,Phypa1|30451,Phypa1|31377  
AT1G51510 Phypa1|28106,Phypa1|25607  
AT4G22310,AT4G05590,AT4G14695 Phypa1|29604,Phypa1|33540  
AT5G43050 Phypa1|1215  
AT5G42300,AT3G45180 Phypa1|39662  
AT4G13990,AT2G29040,AT2G32750,AT2G32740,AT2G31990  
AT5G62220  
Phypa1|35917  
Phypa1|7912  
AT1G68470  
AT2G20370 Phypa1|30992,Phypa1|30991,Phypa1|24278  
AT5G41250,AT1G63450  
Phypa1|31283,Phypa1|25458,Phypa1|944,Phypa1|25284,Phypa1|16063,Phypa1|65

Phypa1|470,Phypa1|466  
Phypa1|1831,Phypa1|37,Phypa1|38171  
AT4G22580 Phypa1|1826,Phypa1|36500,Phypa1|1879,Phypa1|24581,Phypa1|24590  
AT2G42700 Phypa1|28945  
AT3G17070 Phypa1|36451,Phypa1|24829,Phypa1|25131,Phypa1|36669,Phypa1|24766  
AT5G42180,AT5G51890,AT4G33420  
AT3G01190,AT5G15180,AT1G05240,AT1G05250,AT3G21770,AT1G05260,AT4G11290,AT2G39040  
Phypa1|29253  
Phypa1|28436  
AT3G42570  
AT2G22420 Phypa1|25479  
AT5G39580,AT5G64120,AT5G64100,AT5G64110,AT2G41480,AT4G25980,AT1G77100  
Phypa1|29125,Phypa1|29131,Phypa1|29900  
AT5G66390,AT2G18140,AT2G18150,AT4G36430,AT3G50990,AT1G44970,AT2G35380  
Phypa1|37907,Phypa1|37908  
Phypa1|5611  
Phypa1|2680,Phypa1|38021,Phypa1|28921,Phypa1|36586  
Phypa1|12599,Phypa1|27729,Phypa1|8154,Phypa1|28267,Phypa1|36473,Phypa1|17969,Phypa1|29472,P  
hypa1|31221,Phypa1|2489,Phypa1|20384,Phypa1|39563,Phypa1|27049  
Phypa1|1905  
AT3G28200,AT5G40150,AT5G47000,AT4G17690,AT1G24110,AT5G14130,AT4G30170,AT2G18980,AT4G37530,AT4  
G37520,AT5G67400,AT3G49960,AT2G34060,AT1G71695  
Phypa1|24315,Phypa1|35633,Phypa1|2966,Phypa1|2656,Phypa1|1969,Phypa1|26444,Phypa1|37506,Phy  
pa1|23973  
Phypa1|25252,Phypa1|26083  
AT2G24800,AT4G31760,AT1G30870  
Phypa1|2567,Phypa1|2568  
Phypa1|18047  
AT1G68850  
Phypa1|36217,Phypa1|7248  
Phypa1|29475  
AT2G43480,AT5G24070,AT4G33870  
Phypa1|31257  
AT1G14540,AT1G14550  
AT4G16270 Phypa1|9166,Phypa1|27693  
AT4G08770,AT4G08780,AT3G49120,AT3G49110,AT3G32980,AT2G38390,AT2G38380,AT5G06730,AT5G06720,AT5  
G19880,AT5G19890,AT1G49570  
AT2G37130,AT4G21960 Phypa1|38111,Phypa1|12049  
Phypa1|36920,Phypa1|26682,Phypa1|39194,Phypa1|39700  
Phypa1|24915  
Phypa1|24789,Phypa1|18222,Phypa1|38013  
AT5G05340,AT5G58400,AT5G58390  
AT5G22410  
AT4G26010,AT1G34510,AT5G17820,AT3G03670 Phypa1|2601,Phypa1|27705  
AT1G50650 Phypa1|871,Phypa1|5989  
Phypa1|28283  
Phypa1|37511,Phypa1|870  
Phypa1|25412  
AT5G55110,AT4G26880,AT1G50720  
AT1G53130 Phypa1|26659  
AT1G11925  
AT3G17040 Phypa1|26088  
Phypa1|2362  
AT5G04420  
Phypa1|24491,Phypa1|34517  
Phypa1|11051  
AT5G27630,AT3G05420 Phypa1|23848,Phypa1|26212  
AT3G04950 Phypa1|31977  
AT3G48820 Phypa1|30787  
AT1G08660 Phypa1|29005  
AT2G46140,AT1G01470 Phypa1|24080  
AT5G11100,AT1G05500  
AT2G21010,AT2G20990,AT1G20080 Phypa1|2882,Phypa1|24777,Phypa1|38279  
AT5G04220  
AT2G21040 Phypa1|18652,Phypa1|7024  
Phypa1|29072  
AT1G15230 Phypa1|34263  
AT4G00380,AT1G15910,AT1G80790,AT4G01780,AT3G48670,AT3G12550,AT4G01180,AT5G59390,AT1G13790,AT3  
G29375 Phypa1|17157,Phypa1|17168,Phypa1|20277  
AT2G16490 Phypa1|9446  
AT1G28340 Phypa1|24651  
AT1G25570 Phypa1|38362,Phypa1|31908  
AT4G30690,AT2G24060 Phypa1|34140,Phypa1|35461  
AT5G14140,AT1G50080 Phypa1|4738,Phypa1|1099  
AT4G18060,AT4G39020,AT4G34660,AT1G31440  
Phypa1|37639,Phypa1|34584,Phypa1|2674,Phypa1|25714,Phypa1|37494,Phypa1|28055,Phypa1|24498,P  
hypo1|577  
AT1G76110,AT1G04880,AT1G55650,AT3G13350 Phypa1|30249,Phypa1|2288  
Phypa1|14437  
AT1G20760  
AT1G21630  
Phypa1|33514,Phypa1|5747,Phypa1|34123,Phypa1|7268,Phypa1|4900,Phypa1|17265,Phypa1|16354

AT3G18700 Phypa1|6638  
 AT1G59820 Phypa1|33533  
 Phypa1|14560,Phypa1|401  
 Phypa1|25909,Phypa1|25961  
 AT1G17500,AT1G72700,AT1G54280,AT3G13900  
 AT3G25610,AT1G13210,AT1G26130,AT1G68710,AT3G27870 Phypa1|38425,Phypa1|37250  
 Phypa1|36673,Phypa1|39345,Phypa1|15286  
 AT5G44240 Phypa1|34400  
 AT5G04930  
 AT3G16200 Phypa1|26655  
 AT1G48170 Phypa1|33378  
 AT4G14950,AT1G05360 Phypa1|25349,Phypa1|24551  
 AT5G44740 Phypa1|33284,Phypa1|27744  
 AT1G61900,AT2G30700 Phypa1|28667  
 AT4G32810 Phypa1|24999  
 AT1G60390,AT1G23760,AT1G70370 Phypa1|2214  
 AT3G07080 Phypa1|37503  
 AT4G17330 Phypa1|4271,Phypa1|33613  
 Phypa1|22684  
 AT2G21790 Phypa1|29566,Phypa1|29655,Phypa1|36687,Phypa1|39284  
 Phypa1|32800  
 AT3G20050 Phypa1|38897,Phypa1|38517,Phypa1|39312  
 AT5G20890 Phypa1|37913,Phypa1|39007  
 AT1G24510 Phypa1|34955  
 AT3G18190 Phypa1|39197,Phypa1|17358  
 AT1G67760  
 AT3G11830Phypa1|37947,Phypa1|36266  
 AT3G02530,AT5G16070 Phypa1|28002,Phypa1|37268  
 AT4G08640  
 AT5G26360 Phypa1|39124,Phypa1|8903,Phypa1|16260  
 AT3G03960 Phypa1|39705  
 AT5G10710 Phypa1|27768,Phypa1|29605  
 AT4G16340 Phypa1|28253,Phypa1|36219,Phypa1|26532,Phypa1|26524,Phypa1|37945,Phypa1|35305  
 AT5G51060,AT4G25090,AT5G47910,AT5G07390,AT1G09090,AT1G19230,AT1G64060,AT4G11230,AT5G60010,AT3  
 G45810 Phypa1|29346,Phypa1|38436,Phypa1|38303,Phypa1|4373  
 AT2G31760,AT2G31770,AT2G31780  
 AT5G63730,AT5G63750,AT5G63760,AT5G08730  
 AT1G05880  
 AT3G27720,AT3G27710,AT4G34370,AT2G16090 Phypa1|27533,Phypa1|24670  
 AT2G31510,AT1G05890  
 AT1G65430 Phypa1|28687,Phypa1|37093,Phypa1|28397,Phypa1|36006  
 AT2G17350 Phypa1|25062,Phypa1|38927  
 AT3G57780,AT2G42320,AT5G06930,AT5G43220,AT3G01810,AT5G43230 Phypa1|27084,Phypa1|1776  
 AT3G48960,AT3G49010,AT5G23900  
 Phypa1|36501,Phypa1|39748,Phypa1|36613,Phypa1|39051,Phypa1|38327  
 AT5G03080 Phypa1|29508,Phypa1|23712  
 AT3G16565 Phypa1|25920  
 AT5G19630 Phypa1|35658  
 AT4G19050,AT5G45550,AT5G20430,AT5G20440 Phypa1|39360,Phypa1|36999  
 AT5G63910 Phypa1|26900  
 AT5G63190,AT3G48390,AT4G24800,AT1G22730 Phypa1|2542,Phypa1|29066,Phypa1|26839  
 AT3G12070,AT5G12210 Phypa1|36343,Phypa1|37413  
 Phypa1|4110  
 Phypa1|25356  
 AT5G48160,AT3G07780,AT3G63500,AT1G14740 Phypa1|7531,Phypa1|25672  
 AT5G42670,AT5G52070 Phypa1|7800  
 AT3G57560 Phypa1|39144  
 AT2G26500 Phypa1|29542,Phypa1|25021  
 AT1G62810,AT3G43670,AT4G12280,AT4G12290,AT4G14940,AT1G31690,AT1G31710,AT1G31680,AT1G31670,AT2  
 G35612,AT4G12270 Phypa1|37352  
 AT3G52640 Phypa1|36606  
 AT5G47680 Phypa1|591,Phypa1|155  
 AT5G56500,AT3G13470,AT1G55490 Phypa1|24233,Phypa1|36109,Phypa1|25009  
 AT2G28000 Phypa1|27725,Phypa1|25147  
 AT2G33210,AT3G23990 Phypa1|37343,Phypa1|39664,Phypa1|32917,Phypa1|2623  
 Phypa1|37444  
 AT1G26230  
 AT3G13860  
 AT5G18820  
 AT1G77620 Phypa1|17032  
 AT3G63000,AT2G47970 Phypa1|33109  
 AT5G18920 Phypa1|3157  
 Phypa1|31572  
 AT1G60440  
 AT4G32180 Phypa1|2777  
 Phypa1|33734,Phypa1|36265  
 AT2G28100 Phypa1|38625  
 AT1G71110,AT2G12400,AT2G25270,AT1G80540,AT5G67550  
 Phypa1|15461,Phypa1|31969,Phypa1|15256,Phypa1|33036,Phypa1|10496,Phypa1|32305  
 AT5G59460 Phypa1|16134  
 Phypa1|3803,Phypa1|26955  
 AT4G36790,AT2G18590 Phypa1|26414

AT1G78130,AT5G10190 Phypa1|28704,Phypa1|28370  
AT5G27680 Phypa1|16979,Phypa1|405  
Phypa1|28208  
AT2G43560 Phypa1|231  
AT1G22800 Phypa1|28886  
Phypa1|39492  
AT5G16710,AT5G36270,AT1G75270,AT1G19550,AT1G19570 Phypa1|2533  
Phypa1|17545  
AT3G59660 Phypa1|27088  
AT1G34430,AT3G25860 Phypa1|96,Phypa1|80,Phypa1|84  
AT3G02420 Phypa1|32665  
AT1G12550,AT5G28310,AT2G45630,AT1G79870 Phypa1|24355,Phypa1|23927  
AT1G12860,AT3G26744 Phypa1|32328,Phypa1|38601,Phypa1|34730,Phypa1|1240  
Phypa1|37490,Phypa1|702  
AT5G10570,AT5G65640  
AT2G16910 Phypa1|34220,Phypa1|25420  
AT4G25050,AT5G27200,AT3G05020,AT1G54630,AT1G54580 Phypa1|1265,Phypa1|1266,Phypa1|38727  
AT5G48410,AT5G48400,AT3G07520,AT3G04110,AT2G29100,AT2G29110,AT2G29120,AT2G24710,AT2G24720,AT4  
G31710,AT5G27100,AT5G11180,AT5G11210,AT2G17260,AT4G35290,AT1G42540,AT3G51480,AT1G05200,AT2G32  
390,AT2G32400 Phypa1|37773,Phypa1|26446  
AT5G24740 Phypa1|17888  
AT4G27310,AT5G54470,AT3G21890,AT4G15248 Phypa1|5695,Phypa1|32570,Phypa1|33646,Phypa1|20117  
AT1G78770 Phypa1|30533  
AT5G41960 Phypa1|25722  
AT5G67220 Phypa1|20931,Phypa1|1911,Phypa1|29758  
AT2G45710,AT3G61110,AT5G47930  
Phypa1|2671,Phypa1|2893,Phypa1|31968,Phypa1|36948,Phypa1|39242  
AT1G51100Phypa1|724  
AT1G15320,AT4G18650,AT1G55710,AT4G18690,AT5G45830,AT4G18660,AT4G18680,AT3G14880  
Phypa1|1500  
AT2G20980 Phypa1|36717  
AT5G61760,AT5G07370 Phypa1|36268  
AT2G40316 Phypa1|32095,Phypa1|25980  
Phypa1|22228  
AT1G11860Phypa1|4759,Phypa1|27282  
AT5G35430 Phypa1|39581,Phypa1|30273  
AT1G61280 Phypa1|2140  
Phypa1|23426  
Phypa1|31070,Phypa1|30761  
AT4G30570 Phypa1|38996,Phypa1|37954  
AT3G55590  
AT2G39770  
AT1G73600,AT1G48600,AT3G18000 Phypa1|12223,Phypa1|33103  
AT5G43340  
Phypa1|25669  
AT4G08878,AT1G20860,AT1G76430  
Phypa1|29838,Phypa1|10333,Phypa1|30642,Phypa1|23758,Phypa1|24155,Phypa1|37561  
AT2G38940,AT3G54700  
AT4G08895  
Phypa1|25668  
AT2G32830,AT5G43370,AT5G43350,AT5G43360  
AT4G02350,AT3G56640 Phypa1|26374,Phypa1|39134  
AT2G43040,AT1G27460,AT4G28600 Phypa1|31628,Phypa1|26816  
AT5G66030 Phypa1|38553,Phypa1|24850  
Phypa1|19840,Phypa1|5953,Phypa1|35177,Phypa1|19698,Phypa1|19213  
AT5G08290 Phypa1|39123  
AT4G29840,AT1G72810 Phypa1|29521,Phypa1|27736,Phypa1|26224,Phypa1|24795  
Phypa1|82,Phypa1|31309  
Phypa1|23959,Phypa1|34258,Phypa1|4145,Phypa1|39579  
AT5G12860 Phypa1|25170  
AT5G64290  
AT5G64280  
Phypa1|26603,Phypa1|36845,Phypa1|36302  
AT1G47550 Phypa1|16472  
AT1G47560 Phypa1|10603  
AT4G19490 Phypa1|16487,Phypa1|27886  
AT4G22840,AT4G12030 Phypa1|30174  
AT3G25410 Phypa1|29148,Phypa1|28335  
AT3G16380  
AT2G18510 Phypa1|36759  
AT1G01080  
AT1G34140  
AT2G35410  
AT3G46020  
Phypa1|35049,Phypa1|24056,Phypa1|33947,Phypa1|26292  
AT3G52380  
AT3G52150  
AT1G60000 Phypa1|27728,Phypa1|29517,Phypa1|1517,Phypa1|2040  
AT2G36660  
AT3G19350,AT5G19030 Phypa1|26097  
AT2G37220,AT3G53460,AT5G50250,AT4G24770

AT4G09040 Phypa1|26284  
AT4G34110,AT1G49760,AT2G15500,AT2G23350  
AT5G03580  
AT1G71770,AT1G22760  
AT4G16566 Phypa1|28373,Phypa1|26959  
AT5G55490 Phypa1|27880  
AT2G44090,AT3G59910 Phypa1|39098,Phypa1|37552,Phypa1|26116,Phypa1|38275  
Phypa1|22301  
Phypa1|22436  
Phypa1|22935,Phypa1|20579  
AT5G20990 Phypa1|27940  
AT4G31780,AT5G20410,AT2G11810 Phypa1|25267,Phypa1|23766  
AT2G40190 Phypa1|37817  
AT4G01660 Phypa1|31851  
AT2G19860,AT4G29130,AT1G50460,AT3G20040,AT4G37840,AT1G47840  
Phypa1|39688,Phypa1|24519,Phypa1|24922,Phypa1|39703,Phypa1|29013,Phypa1|39034,Phypa1|29498,  
Phypa1|2663,Phypa1|23946,Phypa1|2727,Phypa1|38560  
AT1G30380 Phypa1|2445,Phypa1|1241,Phypa1|24595  
AT4G03430 Phypa1|38280,Phypa1|39354  
AT2G41620,AT3G57350 Phypa1|31863  
AT1G64720,AT5G54170,AT4G14500,AT3G23080 Phypa1|28948,Phypa1|30790  
AT1G55960,AT3G13062 Phypa1|30358  
AT5G27760,AT3G05550 Phypa1|23697,Phypa1|2429  
AT3G22450  
Phypa1|26515  
AT1G08845 Phypa1|2137  
AT3G20230 Phypa1|39054  
AT5G01670  
AT2G37790,AT2G37770,AT3G53880,AT2G37760 Phypa1|34987,Phypa1|37295  
AT1G59950,AT1G59960,AT5G62420 Phypa1|37703  
Phypa1|30687,Phypa1|21341,Phypa1|23979,Phypa1|23711,Phypa1|35066,Phypa1|23248  
AT2G21250,AT2G21260 Phypa1|38445  
Phypa1|26859  
AT2G17705 Phypa1|32294,Phypa1|33753,Phypa1|5642  
AT1G03350,AT4G13110 Phypa1|17979,Phypa1|35554  
Phypa1|38429  
AT2G38060  
Phypa1|21780  
Phypa1|1564  
AT3G46980 Phypa1|38637  
AT2G29650  
AT5G20380 Phypa1|37515  
AT5G44370 Phypa1|35693  
Phypa1|21629  
AT4G00370  
Phypa1|30006  
Phypa1|22133,Phypa1|30445  
AT5G08415 Phypa1|38229  
AT2G20860 Phypa1|36761  
Phypa1|15891  
AT1G33250 Phypa1|27344  
AT1G01570,AT4G00300,AT4G11350,AT4G23490,AT5G41460,AT1G07850,AT2G37730,AT3G11420,AT5G12460,AT1  
G05280,AT4G15240  
Phypa1|972,Phypa1|37106,Phypa1|37361,Phypa1|28472,Phypa1|478,Phypa1|25018,Phypa1|486  
AT4G28200 Phypa1|26026  
AT1G73430 Phypa1|27017,Phypa1|36610  
AT3G55340 Phypa1|29469  
AT1G21790 Phypa1|39630  
AT1G67700 Phypa1|27004  
AT2G01590 Phypa1|34524  
Phypa1|68  
AT4G28070,AT4G30490 Phypa1|24487,Phypa1|24903  
AT5G21070 Phypa1|37830  
AT1G79730 Phypa1|19082,Phypa1|1858  
AT4G08990,AT4G14140,AT4G13610,AT5G49160 Phypa1|21747,Phypa1|1747  
AT3G31960,AT4G27040 Phypa1|13912  
AT5G04520 Phypa1|36157  
AT4G30790 Phypa1|26826,Phypa1|29836  
AT5G44000 Phypa1|30218  
AT4G19880,AT5G45020,AT5G44990 Phypa1|13135  
Phypa1|35869  
AT1G62040,AT4G04620,AT4G21980,AT3G15580,AT3G06420,AT2G05630,AT4G16520,AT2G45170,AT3G60640  
Phypa1|34704,Phypa1|312,Phypa1|37613,Phypa1|39446,Phypa1|38374,Phypa1|29418  
AT3G18520 Phypa1|29930,Phypa1|28246  
AT5G61070  
AT5G61050,AT5G61060 Phypa1|6951  
AT1G01920 Phypa1|26123  
AT1G49930  
Phypa1|30997  
AT5G22800 Phypa1|35977  
AT1G50200  
Phypa1|22130,Phypa1|27709



Phypa1|28512  
Phypa1|4304  
AT3G04500 Phypa1|28393  
AT5G45450,AT3G17650,AT1G48370,AT1G65730,AT5G53550,AT5G24380,AT4G24120,AT5G41000,AT3G27020  
Phypa1|24412,Phypa1|25918,Phypa1|10323  
AT1G67500 Phypa1|29564  
AT5G53270,AT5G53260,AT1G03120,AT5G27980 Phypa1|20480  
AT3G22500,AT3G22490  
Phypa1|28560,Phypa1|37919  
AT5G62280,AT3G60780,AT2G45360,AT1G62840,AT1G12320 Phypa1|35055,Phypa1|34791  
AT2G05320 Phypa1|24745,Phypa1|39654  
AT1G61690 Phypa1|34550  
AT3G16480,AT1G51980 Phypa1|38495,Phypa1|38769,Phypa1|37664,Phypa1|24887,Phypa1|7181  
AT3G52160,AT2G26250 Phypa1|29581,Phypa1|38095  
AT2G15090,AT4G34250,AT4G34520,AT1G19440,AT4G34510,AT2G16280  
Phypa1|32454,Phypa1|23747,Phypa1|4133,Phypa1|32995,Phypa1|23682,Phypa1|18709  
AT2G26640,AT5G43760,AT1G04220 Phypa1|5592,Phypa1|38420,Phypa1|37754,Phypa1|2678  
AT1G25450,AT1G68530  
AT5G04530,AT1G07720,AT2G28630  
Phypa1|9579  
Phypa1|27800,Phypa1|32475  
AT1G01120,AT3G10280,AT2G46720  
AT1G71160,AT5G49070  
AT5G03160 Phypa1|1848  
AT5G38220,AT1G66900,AT3G01690,AT5G14390,AT4G24760,AT2G24320,AT4G31020,AT1G32190,AT1G13610,AT3  
G30380 Phypa1|23922  
AT3G50685 Phypa1|797  
Phypa1|39299  
Phypa1|519  
AT2G26560,AT4G37070,AT4G37060,AT5G43590,AT4G37050  
Phypa1|3146,Phypa1|24402,Phypa1|28187,Phypa1|26559,Phypa1|976,Phypa1|37399  
AT5G19610,AT1G13980,AT5G39500 Phypa1|6469,Phypa1|27442,Phypa1|36051  
AT3G21080,AT2G28070,AT1G51500,AT3G21090,AT1G51460 Phypa1|19299  
AT1G17840 Phypa1|30171,Phypa1|2919,Phypa1|6760,Phypa1|29406,Phypa1|30109,Phypa1|27252  
AT5G11780Phypa1|13883  
AT5G01770,AT3G08850 Phypa1|33930,Phypa1|37571,Phypa1|25461,Phypa1|38859,Phypa1|13091  
AT5G19430,AT5G12310 Phypa1|30257  
AT3G27960,AT1G27500  
AT2G31240 Phypa1|36159,Phypa1|34354  
Phypa1|39491,Phypa1|1808,Phypa1|28610,Phypa1|2245  
AT4G10840  
Phypa1|20450  
AT4G23860 Phypa1|32011,Phypa1|28993  
AT4G17585,AT5G46600,AT5G46610,AT4G17970,AT1G08430,AT1G08440,AT2G27240,AT3G11680,AT4G00910  
Phypa1|26719  
Phypa1|8649,Phypa1|32930  
AT3G25545 Phypa1|28499  
AT5G15930,AT3G02460 Phypa1|37791,Phypa1|25102  
AT1G79750,AT5G11670,AT5G25880,AT2G19900 Phypa1|36386,Phypa1|38168,Phypa1|24365  
AT4G00570,AT2G13560 Phypa1|16490,Phypa1|37966  
Phypa1|31485  
AT1G51450 Phypa1|4396,Phypa1|33579  
AT2G33030 Phypa1|35927  
Phypa1|1018  
AT1G63430,AT5G41180  
AT1G78530,AT5G41680  
Phypa1|36088  
Phypa1|28098  
AT5G62710  
AT4G33430,AT2G13800,AT2G13790  
Phypa1|39732  
AT1G68780,AT3G25670,AT1G13230 Phypa1|117,Phypa1|30400,Phypa1|511  
Phypa1|30895,Phypa1|29100,Phypa1|29172,Phypa1|26755  
AT5G39390 Phypa1|39341  
AT5G44700,AT4G20140,AT2G26380,AT1G33590,AT1G33610,AT1G33600,AT1G33670,AT5G06870,AT5G06860,AT3  
G12610,AT3G20820,AT5G12940,AT5G23400 Phypa1|30183,Phypa1|407,Phypa1|1755,Phypa1|1387  
AT4G18760,AT5G45770  
Phypa1|36505  
AT2G01210,AT1G25320,AT1G66830 Phypa1|916,Phypa1|25966  
Phypa1|25907  
AT1G28440,AT4G28490,AT5G65710 Phypa1|28729,Phypa1|25035  
Phypa1|902  
AT3G15410 Phypa1|35331  
AT5G07280 Phypa1|28623,Phypa1|29370,Phypa1|9420,Phypa1|36507,Phypa1|38716,Phypa1|38966  
AT5G07150  
AT1G53730,AT3G14350,AT1G78980,AT3G13065  
Phypa1|4690,Phypa1|1557  
AT4G03010,AT1G03440 Phypa1|133,Phypa1|28349  
AT3G02130 Phypa1|29914  
AT5G45800  
Phypa1|28690  
AT4G20940,AT5G10020,AT2G27060 Phypa1|30073,Phypa1|945

AT3G43740,AT5G21090  
AT1G12460,AT1G62950 Phypa1|36689,Phypa1|28854  
AT1G75820,AT3G49670,AT5G65700,AT4G20270 Phypa1|25002,Phypa1|24607  
AT3G59510  
AT5G46080 Phypa1|1654  
AT2G41820,AT1G34420  
AT5G06940,AT1G51830 Phypa1|28256  
AT2G33170,AT5G63930,AT1G17230 Phypa1|37479,Phypa1|37622  
AT5G66330 Phypa1|37900  
AT5G61570  
AT5G63710,AT5G65240,AT5G10290  
AT1G74360  
AT5G07180,AT5G62230,AT2G26330  
Phypa1|27921,Phypa1|26614,Phypa1|897,Phypa1|27856,Phypa1|2555,Phypa1|30244  
Phypa1|38639,Phypa1|38840  
AT4G22130 Phypa1|30360  
Phypa1|24917  
AT3G12145  
AT5G20690,AT3G42880,AT1G72460,AT3G20190,AT1G50610,AT5G35390,AT2G07040,AT4G31250  
AT1G53440,AT1G53430,AT1G29750,AT5G61240,AT1G13910  
AT1G80080 Phypa1|26602  
AT4G08850,AT1G35710  
AT1G72180  
AT2G35620,AT1G31420 Phypa1|28868,Phypa1|26372,Phypa1|27546,Phypa1|39321,Phypa1|27313  
Phypa1|20835  
Phypa1|8776  
AT1G47885  
AT3G17640 Phypa1|1617  
Phypa1|37756,Phypa1|39639  
AT1G73070,AT1G73080,AT1G17750 Phypa1|17708,Phypa1|460,Phypa1|28470,Phypa1|29701  
AT5G51560,AT2G45340,AT4G22730 Phypa1|28375,Phypa1|30861  
AT1G51840 Phypa1|36194  
AT2G15320  
AT4G28560 Phypa1|1417,Phypa1|18615  
Phypa1|13048  
Phypa1|34960  
Phypa1|15064  
Phypa1|1033,Phypa1|1072  
Phypa1|24981,Phypa1|24943,Phypa1|24966  
Phypa1|2261  
AT5G06820  
AT1G55610,AT3G13380,AT4G39400,AT2G01950  
AT3G56370,AT5G01890 Phypa1|2861,Phypa1|12793  
Phypa1|39191  
Phypa1|25007  
Phypa1|7361  
AT2G23300,AT4G37250,AT5G67280,AT4G34220,AT2G15300  
Phypa1|19562  
AT2G34930,AT4G04220,AT1G65380,AT5G49290,AT1G74180,AT2G25470,AT1G54480,AT1G74170,AT1G74190,AT1  
G74200,AT1G58190,AT3G53240,AT1G07390  
AT3G11010,AT5G27060,AT3G28890,AT3G11080,AT3G05650,AT3G05660,AT2G15080,AT1G47890,AT1G45616,AT4  
G13880,AT4G13920,AT4G13810,AT4G13820,AT1G71400,AT1G71390,AT3G05360,AT3G05370,AT3G23120,AT3G23  
110,AT3G23010,AT3G24982,AT3G25020,AT3G25010,AT3G24900,AT2G33020,AT2G32680,AT2G25440,AT2G33060,  
AT2G33050,AT2G33080,AT2G32660,AT5G40170  
AT2G16250,AT4G39270 Phypa1|26033,Phypa1|25042  
AT3G17840,AT1G48480,AT3G02880,AT5G16590  
AT2G26730,AT5G58300,AT3G08680,AT5G05160  
Phypa1|37724,Phypa1|35944,Phypa1|1797,Phypa1|31560,Phypa1|39410,Phypa1|1796,Phypa1|449  
AT4G29240,AT2G19780  
AT2G31880 Phypa1|36639  
AT5G07620  
AT2G25790,AT5G51350  
AT1G56130,AT1G56140,AT1G56120,AT1G56145,AT1G07650,AT3G14840,AT1G53420,AT1G29730,AT1G29740  
Phypa1|13  
AT3G28040 Phypa1|1936  
Phypa1|29875  
AT4G23740,AT1G64210,AT5G24100,AT5G53320  
Phypa1|38116  
AT1G34210,AT1G71830 Phypa1|36968,Phypa1|25789,Phypa1|27806  
Phypa1|38075,Phypa1|24422  
Phypa1|34982  
AT4G03390,AT2G20850,AT1G11130  
AT5G59616 Phypa1|29164

Phypa1|28431,Phypa1|13898,Phypa1|6816,Phypa1|36238  
AT4G36180,AT1G75640 Phypa1|13642,Phypa1|37163,Phypa1|29185  
AT1G72300,AT1G17240,AT1G17250,AT2G02220,AT5G53890  
Phypa1|13896  
Phypa1|33364  
AT2G36570  
AT2G24230,AT5G58150 Phypa1|36349,Phypa1|1353,Phypa1|38368,Phypa1|27656  
AT1G27190,AT1G69990,AT3G28450  
AT5G46330 Phypa1|20636,Phypa1|30186  
Phypa1|14746  
AT3G47580,AT3G47090,AT3G47570,AT3G47110,AT5G20480  
AT5G45780  
Phypa1|18508,Phypa1|26627  
Phypa1|26573,Phypa1|35934  
AT2G42800  
AT1G34110,AT3G24240,AT5G48940,AT4G26540,AT5G56040  
Phypa1|1479  
Phypa1|29243  
AT1G34290 Phypa1|28984,Phypa1|1111  
AT4G16162,AT3G49750,AT5G65830  
AT5G58540  
AT2G02780,AT1G14390,AT3G03770,AT5G14210,AT5G63410 Phypa1|32464  
AT5G49780,AT5G49760,AT5G49770,AT5G49750,AT1G79620  
Phypa1|34807,Phypa1|32621,Phypa1|15312,Phypa1|1812  
AT1G69270  
Phypa1|1323  
AT1G08590,AT4G28650,AT5G61480  
Phypa1|34385  
AT5G49660,AT1G09970,AT3G19700  
Phypa1|6984  
AT3G51740,AT3G56100 Phypa1|35870,Phypa1|418  
AT5G48740  
AT1G60800,AT3G25560,AT5G16000,AT4G30520,AT2G23950 Phypa1|3075,Phypa1|26535,Phypa1|38364  
AT3G50230,AT5G67200,AT5G43020,AT1G60630  
Phypa1|33053  
AT1G67510  
AT3G57830,AT2G42290  
AT5G48380 Phypa1|16582,Phypa1|37459,Phypa1|24426  
AT3G23750,AT1G66150,AT2G01820,AT1G24650  
AT2G14440,AT2G14510,AT1G07550,AT3G46420,AT3G46340,AT3G46400,AT3G46370,AT3G46350,AT5G59650,AT5  
G59680,AT5G59660,AT5G59670,AT3G46330,AT5G16900,AT1G07560,AT1G51850,AT1G51820,AT1G51805,AT3G21  
340,AT2G04300,AT1G51810,AT1G49100,AT2G28990,AT2G28970,AT2G28960,AT2G29000,AT4G20450,AT1G51870,  
AT1G51860,AT1G51880,AT1G51890,AT1G51910,AT1G51800,AT2G19230,AT2G19210,AT2G19190,AT4G29990,AT1  
G05700,AT4G29450,AT4G29180,AT1G51790,AT1G69910,AT1G67720,AT2G37050  
Phypa1|16013  
Phypa1|5552  
AT5G25910,AT5G25930  
AT1G68400 Phypa1|27980  
Phypa1|36447,Phypa1|37991,Phypa1|9595  
Phypa1|37747  
Phypa1|543,Phypa1|29755,Phypa1|1037  
Phypa1|37654  
AT1G06840,AT5G01950,AT3G53590,AT5G37450 Phypa1|27974,Phypa1|30348,Phypa1|18,Phypa1|28495  
Phypa1|616  
Phypa1|620  
AT3G56050 Phypa1|28688  
AT5G13290  
AT2G24130 Phypa1|30234,Phypa1|45,Phypa1|36640,Phypa1|1368  
Phypa1|32229  
Phypa1|5311  
AT3G24660  
AT5G45840,AT4G18640  
AT5G39720,AT5G39730,AT3G28940,AT3G28930,AT3G28950,AT4G31310,AT2G24390 Phypa1|25123  
AT2G03820 Phypa1|5490,Phypa1|27469  
AT2G14760,AT4G33880,AT5G43175,AT1G27740  
Phypa1|28636,Phypa1|29004  
AT5G37800,AT1G66470 Phypa1|2175,Phypa1|3806  
Phypa1|4013,Phypa1|33101  
AT5G67110Phypa1|2212,Phypa1|27136  
AT4G30980,AT2G24260,AT5G58010  
AT4G02590,AT1G03040  
AT1G75200 Phypa1|28751  
AT3G15150 Phypa1|36947  
AT2G14680 Phypa1|3549  
AT4G35520 Phypa1|3969  
AT2G35810,AT2G35830,AT2G35820 Phypa1|26361  
Phypa1|5304  
AT1G77600 Phypa1|25658,Phypa1|29344,Phypa1|4369  
AT5G10950  
AT5G47690,AT4G31880,AT1G80810,AT1G15940  
AT5G09670,AT5G64550,AT1G64140 Phypa1|439,Phypa1|443  
AT3G16250,AT4G32590 Phypa1|32495

AT5G41150Phypa1|38174  
AT3G58600 Phypa1|29428  
Phypa1|23485  
AT4G30920,AT4G30910,AT2G24200 Phypa1|25683  
Phypa1|20376  
AT4G00860,AT1G01170 Phypa1|38077,Phypa1|38078  
AT5G02710 Phypa1|771  
AT1G09150 Phypa1|37642  
AT1G08380 Phypa1|24031  
AT1G20450,AT1G20440,AT1G76180,AT4G38410 Phypa1|16248,Phypa1|35734,Phypa1|35785  
AT3G19810 Phypa1|33718  
AT1G22700 Phypa1|21936,Phypa1|29704  
AT5G59850,AT1G07770,AT3G46040,AT2G39590,AT2G19720,AT4G29430  
Phypa1|38102,Phypa1|39004,Phypa1|36428,Phypa1|24301,Phypa1|38558,Phypa1|36662  
AT1G43130,AT2G18460,AT2G20130,AT2G20120  
Phypa1|37175,Phypa1|38599,Phypa1|27944,Phypa1|26280  
AT1G07280,AT2G29670,AT3G47080 Phypa1|34362,Phypa1|34701,Phypa1|32759,Phypa1|30864  
AT3G19460,AT2G15280,AT3G54120,AT3G10915,AT2G23640,AT1G68230,AT2G01240,AT5G41600,AT1G64090,AT4G11220,AT4G23630,AT3G61560,AT2G46170,AT4G01230,AT3G10260,AT3G18260  
Phypa1|24956,Phypa1|29392,Phypa1|39706,Phypa1|32526,Phypa1|38006,Phypa1|30227  
AT5G60620 Phypa1|28144  
Phypa1|14309  
AT1G09870 Phypa1|26876,Phypa1|38030  
AT4G21280,AT4G05180 Phypa1|35918,Phypa1|37491  
AT2G01918 Phypa1|2538,Phypa1|32660  
AT1G69330,AT3G29270,AT1G74370 Phypa1|2034,Phypa1|677  
AT4G28550,AT2G20440,AT5G54780,AT4G27100 Phypa1|24650,Phypa1|24604  
AT5G16880,AT1G06210 Phypa1|38422,Phypa1|37778  
AT1G17760 Phypa1|19468,Phypa1|29925  
AT3G18770,AT3G49590 Phypa1|10844,Phypa1|33063  
AT2G20875,AT1G34245 Phypa1|18509  
AT5G08650  
Phypa1|31175  
Phypa1|31617  
AT5G39900 Phypa1|36464  
AT1G78050,AT1G22170 Phypa1|27063,Phypa1|23736,Phypa1|29029,Phypa1|24803,Phypa1|15834  
AT5G19900 Phypa1|35609,Phypa1|7168,Phypa1|8063,Phypa1|16885,Phypa1|32925  
AT2G31740 Phypa1|28827,Phypa1|32492  
AT1G51130,AT3G20760 Phypa1|29698  
AT2G30600 Phypa1|2243  
AT3G01820,AT2G39270,AT2G37250 Phypa1|29278,Phypa1|30235  
AT3G13120 Phypa1|24774,Phypa1|27507,Phypa1|27872  
AT1G03030 Phypa1|37461  
AT3G01800 Phypa1|27502  
AT1G50120 Phypa1|2015,Phypa1|24809  
AT1G71820 Phypa1|36356  
AT1G05480,AT3G24340  
AT2G16390,AT2G21450 Phypa1|25520,Phypa1|24704  
Phypa1|28565  
Phypa1|16554  
AT4G09690  
AT2G21810 Phypa1|4784  
AT3G59130  
Phypa1|2114  
AT5G01480  
Phypa1|11556  
Phypa1|35568  
AT3G06990,AT3G07000,AT1G58037,AT5G45730,AT5G29624,AT5G54050,AT5G54030,AT5G54040,AT5G54020,AT4G14980,AT5G44770,AT2G04500,AT5G40320,AT4G11540,AT4G11550,AT4G11390,AT4G01930,AT4G01910,AT4G01920,AT4G02180,AT4G01925,AT4G01740,AT4G01760,AT4G02190,AT1G69150,AT3G43890,AT1G65180,AT4G01350,AT5G59920,AT5G59940,AT5G59930,AT5G22355,AT3G45840,AT3G48400,AT5G37620,AT2G04680,AT2G19660,AT2G19650,AT3G46810,AT3G46800,AT5G42840,AT3G27473,AT3G28650,AT3G45530,AT3G27510,AT3G27500,AT3G27480,AT3G27490,AT2G43220,AT4G16015,AT5G43040,AT5G43030,AT5G26190,AT1G55380,AT1G55420,AT1G55430,AT1G55390,AT5G42280,AT1G55440,AT2G23100,AT1G55700,AT3G11390,AT3G11385,AT3G11370,AT3G11402,AT2G17590,AT2G17600,AT1G35610,AT3G13760,AT5G17960,AT3G59120,AT2G02640,AT2G02610,AT2G02630,AT2G02690,AT2G02620,AT2G02700,AT2G02680,AT2G40050,AT1G61840,AT3G26550,AT4G10370,AT5G46670,AT5G46660,AT5G55780,AT1G44050,AT5G55800,AT5G55770,AT5G02350,AT2G13900,AT5G02330,AT2G13950,AT5G02340,AT5G02360,AT1G53340,AT1G61710,AT1G34480,AT3G21210,AT3G13590,AT2G28460,AT4G10560,AT1G44020,AT1G44030,AT1G29180,AT4G26380,AT5G03360,AT5G37210,AT4G02540,AT1G62030,AT3G26250,AT3G26240,AT4G15070,AT5G48320,AT4G13130,AT1G66450,AT1G66440,AT3G50010  
AT1G29179,AT2G27660,AT2G44400,AT2G44390,AT2G44380,AT5G43520,AT2G28270,AT2G17740,AT2G44370,AT5G40590,AT2G42060,AT5G16430,AT2G21850,AT2G21830,AT2G21840  
AT2G37810,AT2G37800,AT2G37820  
AT3G25850,AT1G45243  
AT3G49830,AT5G67630 Phypa1|3042,Phypa1|35035  
AT5G22330 Phypa1|3800  
Phypa1|7489  
Phypa1|26695,Phypa1|26703,Phypa1|37567  
AT3G07880,AT1G12070,AT1G62450 Phypa1|18429  
AT5G55060 Phypa1|34291,Phypa1|33329  
AT1G06960,AT2G30260,AT2G47580,AT3G15885 Phypa1|27192  
AT3G53640,AT1G13350,AT3G25840 Phypa1|29064,Phypa1|29427

AT2G25950 Phypa1|33591  
 AT3G12350 Phypa1|29499  
 AT2G33260 Phypa1|8484  
 AT5G22820 Phypa1|33105  
           Phypa1|28051  
           Phypa1|21472  
           Phypa1|14765  
 AT3G22845 Phypa1|38182  
 AT3G07680 Phypa1|29606,Phypa1|27225  
 AT1G66245,AT5G41020 Phypa1|34233  
           Phypa1|38844  
 AT1G04420 Phypa1|30715  
 AT3G57150 Phypa1|24037,Phypa1|37770  
 AT1G02870 Phypa1|35659  
 AT3G05540,AT3G16640 Phypa1|6843,Phypa1|38378  
 AT1G19370,AT1G75140 Phypa1|25652,Phypa1|25987  
 AT1G48130 Phypa1|32403,Phypa1|38524,Phypa1|38225  
 AT2G20210 Phypa1|31532  
           Phypa1|35915  
 AT1G43310,AT5G33320  
 AT1G61800,AT5G54800 Phypa1|34080,Phypa1|26788,Phypa1|28795,Phypa1|1929,Phypa1|1031  
 AT5G46110Phypa1|30716,Phypa1|39737  
 AT3G01550  
           Phypa1|21304  
 AT5G17630  
 AT4G03950  
           Phypa1|2278  
 AT3G48380 Phypa1|34946  
 AT1G27440,AT5G61840 Phypa1|38191  
 AT2G28110,AT5G22940 Phypa1|24965,Phypa1|37655,Phypa1|29953,Phypa1|19785  
 AT1G07700 Phypa1|242,Phypa1|723  
 AT2G46280,AT2G46290 Phypa1|32461,Phypa1|23835,Phypa1|36247  
 AT1G14620 Phypa1|3975  
 AT1G27400,AT1G67430 Phypa1|36192,Phypa1|33644,Phypa1|27404,Phypa1|25915,Phypa1|30291  
 AT5G13200,AT5G23360,AT5G23350,AT5G23370,AT5G08350,AT4G40100,AT2G22475,AT1G28200,AT4G01600  
           Phypa1|1117,Phypa1|1098,Phypa1|673  
 AT5G64400,AT5G09570 Phypa1|30784,Phypa1|34617,Phypa1|38469  
 AT4G24480,AT5G03730 Phypa1|1356  
 AT4G17790,AT4G09580,AT1G71940 Phypa1|26385,Phypa1|25097,Phypa1|23831  
 AT1G60430 Phypa1|34041,Phypa1|36486  
 AT2G32340,AT1G05270 Phypa1|20638,Phypa1|130,Phypa1|11535,Phypa1|35595  
 AT5G57880 Phypa1|7741  
 AT1G31170Phypa1|28359  
 AT3G17860,AT1G48500,AT1G70700 Phypa1|32286  
 AT1G79450,AT1G16360,AT1G54320,AT3G12740,AT5G46150  
           Phypa1|38396,Phypa1|36881,Phypa1|28116,Phypa1|37037,Phypa1|28970  
 AT5G65490 Phypa1|25899  
 AT1G54350 Phypa1|27719,Phypa1|29106,Phypa1|38493,Phypa1|27108  
           Phypa1|3065  
 AT5G35790  
 AT5G40760,AT3G27300 Phypa1|24216,Phypa1|24211,Phypa1|36787  
 AT1G24280,AT5G13110 Phypa1|39611,Phypa1|38604,Phypa1|36366,Phypa1|23827  
 AT1G09420 Phypa1|37256,Phypa1|25626  
 AT5G35080 Phypa1|36175,Phypa1|1073  
 AT3G47650 Phypa1|1659  
 AT5G04460,AT2G27950 Phypa1|35098  
           Phypa1|36102,Phypa1|38130  
 AT5G48930 Phypa1|23725  
 AT1G65445  
           Phypa1|24555,Phypa1|25146  
           Phypa1|37803,Phypa1|37836,Phypa1|1427  
 AT2G19070  
 AT5G17540,AT3G03480 Phypa1|34275  
 AT4G31910  
 AT5G57840  
 AT2G40230,AT1G27620,AT1G03390  
 AT2G23510,AT2G25150,AT5G07080,AT3G47170,AT1G65450,AT1G28680,AT3G62160  
           Phypa1|1423  
 AT1G32910,AT1G78990,AT5G16410,AT1G31490 Phypa1|1433,Phypa1|26386,Phypa1|1424  
 AT5G41040,AT5G63560,AT3G48720 Phypa1|28317  
 AT4G34730 Phypa1|1559  
 AT2G34357,AT4G23540 Phypa1|4104  
 AT3G13445,AT1G55520 Phypa1|39436,Phypa1|24939  
 AT3G02190,AT4G31985,AT2G25210 Phypa1|36916,Phypa1|37041,Phypa1|19154  
 AT1G18500,AT1G74040 Phypa1|26194,Phypa1|28773  
 AT5G23020,AT5G23010 Phypa1|3085,Phypa1|31184,Phypa1|22087,Phypa1|30691  
 AT1G25988,AT1G25682 Phypa1|38099  
           Phypa1|25995,Phypa1|29345,Phypa1|38545  
 AT5G35630 Phypa1|24087,Phypa1|37995,Phypa1|24133,Phypa1|32020  
 AT1G66200,AT5G37600,AT1G48470,AT3G17820,AT5G16570  
 AT5G19130 Phypa1|36052  
 AT2G20530,AT4G28510,AT5G44140,AT1G03860 Phypa1|36072,Phypa1|34756,Phypa1|36425,Phypa1|718

Phypa1|30693  
AT5G14300  
AT5G40770,AT3G27280 Phypa1|39586,Phypa1|24106,Phypa1|23737  
AT2G22640 Phypa1|38479  
AT1G29120 Phypa1|26509,Phypa1|37144  
Phypa1|28312  
AT5G51180,AT4G25770,AT1G10040 Phypa1|28115  
AT3G29280 Phypa1|732  
AT1G59550,AT4G14250,AT3G23605,AT1G14570 Phypa1|25743  
AT4G30870,AT5G39770 Phypa1|36097  
AT3G56110,AT2G40380,AT5G05380,AT2G38360,AT5G01640,AT5G07110,AT5G56230,AT1G55640,AT1G04260,AT3  
G13710,AT3G13720,AT1G55190,AT1G17700,AT4G29658,AT1G08770  
Phypa1|37777,Phypa1|25569,Phypa1|39052,Phypa1|24153  
AT1G76760,AT1G43560 Phypa1|24638  
AT4G03520,AT1G03680,AT3G15360  
Phypa1|29980,Phypa1|25345,Phypa1|38942,Phypa1|30094,Phypa1|27592,Phypa1|29977  
Phypa1|30588  
AT1G50320 Phypa1|29649,Phypa1|24762  
AT2G15570  
AT4G12170  
AT3G06730 Phypa1|27755,Phypa1|1586  
AT1G80380  
Phypa1|24463  
Phypa1|6270  
AT1G03900 Phypa1|189  
AT2G32230,AT5G60430,AT2G16650 Phypa1|36189,Phypa1|35933,Phypa1|30366  
AT4G30940,AT2G24240 Phypa1|39111,Phypa1|24350  
AT5G18440 Phypa1|32946  
AT3G45620,AT4G35140,AT4G38480 Phypa1|36508,Phypa1|24742,Phypa1|483  
AT4G09140 Phypa1|31241,Phypa1|26473  
AT5G18200 Phypa1|29367,Phypa1|36707  
AT4G37460 Phypa1|26934  
AT5G23630 Phypa1|29595,Phypa1|24732  
AT5G62270 Phypa1|5263,Phypa1|31736  
AT2G01490 Phypa1|37797  
Phypa1|30043  
AT4G26910,AT5G55070 Phypa1|24382,Phypa1|39171  
AT5G36170 Phypa1|36796  
Phypa1|31068  
AT3G57190,AT5G20320,AT3G03300  
AT1G56350 Phypa1|29292  
AT4G33810,AT4G33820,AT2G14690,AT4G33830,AT4G33840,AT4G33850,AT4G33860,AT4G38300,AT4G38650  
Phypa1|22627  
AT1G15110Phypa1|37392,Phypa1|24948  
AT4G19150 Phypa1|35088  
Phypa1|1648  
AT2G03430  
Phypa1|15008  
AT5G13310,AT5G13970 Phypa1|15500,Phypa1|32120  
Phypa1|31173  
AT4G24830 Phypa1|17683,Phypa1|19989  
AT2G23930,AT3G11500 Phypa1|37662,Phypa1|39758  
AT3G54440 Phypa1|23437,Phypa1|28008  
AT5G41480 Phypa1|467  
AT4G08230 Phypa1|31598  
Phypa1|17638,Phypa1|24168  
AT5G37610  
AT5G57490  
AT3G49920,AT5G67500  
AT5G15090,AT3G01280 Phypa1|37766,Phypa1|37942  
AT1G35513,AT1G74710,AT1G18870 Phypa1|25404  
AT5G65950 Phypa1|33264  
AT2G39810 Phypa1|26299,Phypa1|18408  
Phypa1|8471  
AT5G57890,AT1G25220,AT1G24909,AT1G25083,AT1G25155,AT1G24807 Phypa1|30364,Phypa1|687  
AT2G39470,AT3G55330 Phypa1|25571  
AT1G72050 Phypa1|1935  
AT1G77320 Phypa1|16532,Phypa1|24337  
AT2G37190,AT3G53430,AT5G60670  
Phypa1|29692,Phypa1|35190,Phypa1|38800,Phypa1|37042,Phypa1|37738,Phypa1|36079,Phypa1|36394  
AT3G21360 Phypa1|24223  
Phypa1|29607  
AT5G58460,AT5G37060  
Phypa1|22925  
Phypa1|20296  
Phypa1|17105  
AT3G53720 Phypa1|23918,Phypa1|37404  
AT2G31910,AT1G05580  
AT2G28170,AT2G30240,AT1G06970,AT5G01690,AT5G01680,AT1G08135,AT1G08140,AT1G08150,AT2G28180,AT3  
G44900,AT5G22900,AT3G44930,AT3G44920,AT3G44910,AT5G22910  
AT3G52080,AT1G79400,AT1G16380 Phypa1|20297  
AT3G17630,AT4G23700,AT5G41610,AT1G64170

AT2G13620  
 AT5G48960 Phypa1|24764,Phypa1|26422  
 AT5G45170 Phypa1|27365  
 AT5G62530 Phypa1|38531  
 AT3G51130Phypa1|26488,Phypa1|24737  
 AT1G19080 Phypa1|38638  
 AT1G69485,AT1G26740 Phypa1|29421  
 AT1G48970,AT5G38640,AT2G44070 Phypa1|23969  
 AT2G22530 Phypa1|30083  
 AT3G27180 Phypa1|455  
 AT3G13780 Phypa1|7108  
 AT1G64430 Phypa1|1379  
 AT3G18730 Phypa1|34418  
 AT5G10350,AT5G65260,AT5G51120 Phypa1|39721,Phypa1|35736,Phypa1|38173,Phypa1|27153  
 AT5G10940 Phypa1|29770  
 AT1G54990 Phypa1|32348  
 AT3G15380 Phypa1|37299,Phypa1|25552  
 AT2G27100 Phypa1|26259,Phypa1|27594,Phypa1|20477  
 AT4G12640 Phypa1|28100,Phypa1|32362  
 AT1G72480,AT1G61670,AT1G10980,AT2G01070 Phypa1|36625,Phypa1|25587  
 AT2G23840 Phypa1|635,Phypa1|636  
 AT4G38110Phypa1|27367  
 AT2G37600,AT3G53740,AT5G02450 Phypa1|33493,Phypa1|36331  
 AT2G41660,AT1G21050,AT1G76610,AT2G22460,AT5G65340,AT2G37880,AT5G06990,AT2G21990,AT4G39610,AT5G42680,AT3G25640,AT5G23100 Phypa1|30079,Phypa1|2021,Phypa1|24517  
 AT5G49960 Phypa1|23762,Phypa1|25200,Phypa1|31874  
 AT2G35320 Phypa1|27123,Phypa1|28606,Phypa1|15222,Phypa1|25596  
 AT2G44710 Phypa1|30100,Phypa1|28509,Phypa1|27810  
 AT3G51510 Phypa1|750  
 AT5G40880,AT5G49200,AT4G25440,AT5G51980 Phypa1|105,Phypa1|104  
 AT1G44414 Phypa1|37446  
 AT3G07220,AT3G07260 Phypa1|23715,Phypa1|38756,Phypa1|38214,Phypa1|7870  
 AT2G46610,AT3G61860,AT4G25500,AT5G52040 Phypa1|34087  
 AT1G16430,AT1G07950 Phypa1|2176,Phypa1|2185  
 AT1G07040,AT1G27020,AT1G27030 Phypa1|10500  
 AT2G34585 Phypa1|6754,Phypa1|2237  
 AT1G73440 Phypa1|13539  
 AT4G33480 Phypa1|28884  
 AT5G45740,AT1G53400,AT1G16960 Phypa1|35273,Phypa1|13516,Phypa1|29097  
 AT1G73380 Phypa1|38508  
 AT1G06900 Phypa1|26016  
 AT3G57470,AT2G41790,AT3G57460 Phypa1|27932,Phypa1|8461,Phypa1|2672,Phypa1|28836  
 AT5G01440  
 Phypa1|26135  
 Phypa1|24075  
 Phypa1|20877  
 Phypa1|31303  
 Phypa1|22915  
 AT4G28720,AT1G04180,AT5G43890,AT2G33230,AT1G04610,AT5G25620,AT4G13260,AT5G11320,AT4G32540  
 Phypa1|28949,Phypa1|25873,Phypa1|28149,Phypa1|2569,Phypa1|4481  
 AT1G21430,AT1G48910  
 Phypa1|15586  
 AT1G47250,AT5G42790 Phypa1|24550,Phypa1|37201  
 AT3G51260,AT5G66140 Phypa1|39752,Phypa1|36153,Phypa1|34904,Phypa1|24920  
 AT3G03780,AT5G17920,AT5G20980  
 Phypa1|39684,Phypa1|38379,Phypa1|38448,Phypa1|8754,Phypa1|16587,Phypa1|31416  
 AT3G12040 Phypa1|27679  
 AT5G11240Phypa1|37208  
 AT5G03780,AT1G01150,AT4G12670 Phypa1|7446,Phypa1|3467  
 AT3G21175,AT1G51600,AT4G24470 Phypa1|628,Phypa1|2683,Phypa1|29195,Phypa1|33786  
 AT5G66120 Phypa1|31238,Phypa1|25857  
 AT1G21120,AT1G21110,AT1G21130,AT1G21100,AT1G76790,AT1G77530,AT1G77520,AT1G63140,AT5G37170,AT5G53810,AT1G33030,AT5G54160,AT1G51990,AT1G62900,AT3G53140 Phypa1|36031,Phypa1|36601  
 AT4G22930 Phypa1|26314  
 AT4G30990 Phypa1|29929  
 AT2G31040 Phypa1|1908  
 Phypa1|22196,Phypa1|31082  
 AT5G46290 Phypa1|39319,Phypa1|26318,Phypa1|26440  
 AT2G04540 Phypa1|27616  
 AT1G74960 Phypa1|36654,Phypa1|14690,Phypa1|38948,Phypa1|27638  
 Phypa1|3103  
 Phypa1|28073,Phypa1|27501  
 AT2G19940 Phypa1|31448  
 AT5G43430 Phypa1|38265  
 Phypa1|30488,Phypa1|23343,Phypa1|31284  
 AT3G59650 Phypa1|32707  
 AT3G49000 Phypa1|28838  
 AT1G60060 Phypa1|27672  
 Phypa1|1925,Phypa1|1442,Phypa1|36650,Phypa1|1452,Phypa1|13974,Phypa1|1446  
 AT1G17930,AT2G04865,AT2G25010,AT1G49920,AT1G64260,AT1G64255  
 Phypa1|12320  
 Phypa1|28581

AT3G62330 Phypa1|39462  
AT3G05440,AT1G09070,AT4G15755,AT3G16510,AT4G15740,AT3G62780  
Phypa1|32431,Phypa1|19718,Phypa1|35578,Phypa1|34282  
AT3G09500,AT3G55170,AT2G39390,AT5G02610 Phypa1|2428,Phypa1|37230,Phypa1|38925,Phypa1|24269  
Phypa1|17875  
AT4G20410 Phypa1|39769  
AT1G16560,AT5G62130 Phypa1|32350,Phypa1|34014  
AT2G05840,AT5G35590 Phypa1|38920,Phypa1|37669,Phypa1|37976,Phypa1|2493  
Phypa1|4140  
AT3G56790,AT3G55930,AT1G28060 Phypa1|35123  
AT1G65260 Phypa1|26921,Phypa1|25300,Phypa1|22009,Phypa1|30059  
AT1G27450 Phypa1|38990  
Phypa1|31287  
AT4G22570,AT4G12440,AT1G80050,AT5G11160  
Phypa1|16584  
Phypa1|3002  
AT3G22400,AT1G55020  
Phypa1|38096,Phypa1|39704,Phypa1|38097,Phypa1|35728,Phypa1|28615,Phypa1|25294,Phypa1|27395,  
Phypa1|37710,Phypa1|30962,Phypa1|1359,Phypa1|30961,Phypa1|30666  
AT1G17420,AT1G72520 Phypa1|36754  
Phypa1|15901  
Phypa1|19210  
Phypa1|16583  
AT1G67560  
AT3G45140  
AT1G30540 Phypa1|23743  
AT5G22000,AT4G14220 Phypa1|28439,Phypa1|24952,Phypa1|1245  
AT5G25960,AT5G25950  
AT2G17750,AT2G19360 Phypa1|523  
AT3G13510,AT1G55360,AT5G56530,AT2G44210  
AT2G27320,AT2G38255,AT2G35250,AT5G46820,AT5G46810,AT4G17860,AT5G46200,AT4G17505,AT5G25410,AT5  
G60380,AT5G25415,AT5G11660,AT5G05030,AT5G36770,AT5G36680,AT1G10190,AT4G15050,AT4G15056,AT4G15  
053,AT4G10210,AT4G10220,AT4G23080,AT5G37520,AT2G24950,AT4G23390,AT2G20170,AT4G23350,AT4G23360,  
AT4G23380,AT4G23370  
AT5G19170,AT3G48230  
AT2G44240,AT2G44220  
AT2G03930 Phypa1|9447,Phypa1|1915,Phypa1|575,Phypa1|13049,Phypa1|10958  
AT1G70550,AT1G23340,AT5G50150,AT1G10750,AT5G18460 Phypa1|2986,Phypa1|37126  
AT2G44250  
AT3G48640,AT3G28270,AT3G57100,AT4G34330,AT4G34320,AT2G18630,AT5G66670,AT5G66660,AT5G66675  
Phypa1|36270  
AT5G19855 Phypa1|2109,Phypa1|27965  
AT5G62310  
AT1G51170,AT3G20830,AT3G25250,AT4G13000  
AT5G47750,AT5G55910,AT4G26610,AT3G27580  
AT2G20040  
AT2G26700,AT2G34650  
Phypa1|33657  
AT3G44610  
AT1G53700,AT3G14370  
AT3G17850,AT1G48490 Phypa1|30066,Phypa1|29741,Phypa1|29653,Phypa1|28622,Phypa1|30241  
Phypa1|29967  
AT2G36350,AT3G52890,AT5G03640  
Phypa1|5220  
Phypa1|26673,Phypa1|37215  
AT2G44830 Phypa1|52,Phypa1|54  
AT5G40030,AT3G12690,AT1G79250,AT1G16440  
AT3G45780,AT5G58140  
Phypa1|5221,Phypa1|15463,Phypa1|39233,Phypa1|7,Phypa1|9095,Phypa1|36884,Phypa1|39772  
AT1G45160  
AT5G25840,AT1G79770,AT2G09970,AT1G72510,AT5G20670,AT1G54095,AT2G25780,AT3G22540,AT4G14819  
Phypa1|1281,Phypa1|289,Phypa1|1282  
AT1G33940,AT5G18700 Phypa1|27939,Phypa1|30272,Phypa1|34636  
AT5G45775,AT4G18730,AT3G58700,AT2G42740 Phypa1|19759,Phypa1|26237  
Phypa1|37800,Phypa1|39419,Phypa1|36391,Phypa1|2498,Phypa1|36431,Phypa1|36571  
AT3G04160 Phypa1|32203  
AT4G31460 Phypa1|2110  
AT3G10110,AT1G18320 Phypa1|756  
AT1G49470  
Phypa1|1554  
Phypa1|36691  
AT1G55240,AT1G55230,AT5G19870 Phypa1|38649  
AT3G07790 Phypa1|34867  
Phypa1|32666  
Phypa1|26038  
AT4G24690  
Phypa1|38816  
AT5G37930,AT1G66650,AT1G66630,AT5G62800,AT5G37870  
Phypa1|1100  
AT3G13672  
Phypa1|1109  
AT3G61790,AT4G27880,AT5G53360 Phypa1|38973,Phypa1|38478



AT3G58040,AT2G41980  
Phypa1|574  
Phypa1|30598  
AT3G61530,AT2G46110  
AT3G10210,AT4G35750 Phypa1|24998  
AT1G14250,AT1G14240,AT1G14230,AT2G02970 Phypa1|7481,Phypa1|29796,Phypa1|1389  
AT3G12480,AT5G19490 Phypa1|25790,Phypa1|27684,Phypa1|2378  
AT5G62950,AT3G28956 Phypa1|37223  
AT4G16720,AT4G17390  
Phypa1|37355,Phypa1|38189,Phypa1|36345,Phypa1|39085,Phypa1|38390,Phypa1|38720  
AT5G63830 Phypa1|27051  
Phypa1|2263,Phypa1|31171  
AT5G10920 Phypa1|24480  
Phypa1|22779  
AT1G11760Phypa1|23938  
AT1G20680,AT1G20740,AT4G38260 Phypa1|39576  
AT5G54600 Phypa1|1585,Phypa1|1583  
AT5G63220 Phypa1|24149,Phypa1|32371,Phypa1|22238  
AT5G21430 Phypa1|31844,Phypa1|33581  
AT3G26890,AT5G41110 Phypa1|34666  
AT4G00231 Phypa1|1869  
AT4G38510,AT1G20260,AT1G76030 Phypa1|23874,Phypa1|35741,Phypa1|38916,Phypa1|15362  
AT4G37020 Phypa1|35594  
AT5G64150 Phypa1|31034  
Phypa1|539  
AT2G20790 Phypa1|37498  
AT1G22450,AT4G28060,AT5G57815,AT1G32710 Phypa1|2233,Phypa1|30394  
AT5G01780  
Phypa1|35062  
AT3G14140,AT3G14160 Phypa1|618  
AT5G37475,AT1G66070 Phypa1|37584,Phypa1|26783,Phypa1|10178,Phypa1|2639,Phypa1|16085  
AT2G44870 Phypa1|25793  
AT4G39850 Phypa1|39161,Phypa1|23901,Phypa1|26393  
AT3G15160 Phypa1|24818,Phypa1|36119  
AT5G58110Phypa1|26018,Phypa1|29352  
AT4G16980  
AT4G11430  
Phypa1|22031  
Phypa1|19894  
Phypa1|8734,Phypa1|33953  
AT5G57070,AT3G43583,AT1G72790,AT1G12810,AT2G33520  
Phypa1|16088  
Phypa1|36113  
Phypa1|31555  
Phypa1|34501  
AT5G15780  
AT5G11990Phypa1|9280  
AT4G27850  
AT5G55750  
AT1G56530  
AT2G28440 Phypa1|35345,Phypa1|32129,Phypa1|38175,Phypa1|34243  
AT1G54215,AT1G72600  
AT1G15825 Phypa1|12721  
AT5G14920  
AT3G19070 Phypa1|1121  
AT3G29570  
AT2G43150,AT3G54590,AT3G54580,AT3G28550,AT1G23720,AT4G08400,AT4G08410,AT5G49080,AT5G06630,AT2  
G24980,AT5G06640,AT5G35190,AT4G13390,AT1G21310,AT1G26240,AT1G26250,AT4G08380,AT4G08370,AT1G76  
930,AT5G26070,AT5G26080,AT3G20850,AT5G19800,AT5G19810,AT4G15160,AT3G22120,AT4G22470,AT1G23040,  
AT1G70990,AT1G02405  
AT1G22420  
AT1G62440,AT1G12040,AT3G22800,AT3G24480,AT4G13340,AT4G18670,AT5G25550,AT4G28380,AT2G15880,AT4  
G33970,AT3G19020,AT1G49490 Phypa1|1912,Phypa1|36358  
AT4G00890,AT1G43790,AT5G48920 Phypa1|21928,Phypa1|33793,Phypa1|34933,Phypa1|9126  
Phypa1|1493,Phypa1|14236,Phypa1|39495  
AT1G49750,AT3G19320,AT4G06744  
Phypa1|9482,Phypa1|31633  
AT2G27390 Phypa1|7288  
AT1G31250 Phypa1|11070  
Phypa1|12821  
AT5G59170,AT2G27380,AT4G38770 Phypa1|23980,Phypa1|4215  
AT1G79480,AT3G22070,AT3G50570,AT3G50580  
Phypa1|35107  
AT5G17340 Phypa1|4921  
AT1G61080 Phypa1|34459  
Phypa1|33219  
Phypa1|18513  
Phypa1|29061  
Phypa1|12777  
AT5G43770  
AT5G08720 Phypa1|30332  
AT1G52260,AT3G16110 Phypa1|36819,Phypa1|24538

AT5G60640,AT3G54960  
Phypa1|26161,Phypa1|39695,Phypa1|38516,Phypa1|3733,Phypa1|30629,Phypa1|35762,Phypa1|1798,Phypa1|12962  
Phypa1|5355  
AT1G48605,AT3G18030 Phypa1|39533,Phypa1|24618  
AT3G01450,AT3G18530,AT5G14790,AT4G15830 Phypa1|587,Phypa1|26043  
AT2G01620,AT3G27290,AT3G26000 Phypa1|26232  
AT5G15200,AT5G39850  
Phypa1|31842,Phypa1|36483,Phypa1|38876,Phypa1|2939,Phypa1|38249,Phypa1|36570,Phypa1|16116  
Phypa1|35495  
AT5G15170 Phypa1|11405,Phypa1|28180  
AT1G26550 Phypa1|28968,Phypa1|37656  
AT2G45320 Phypa1|25452  
AT2G27402,AT2G32180,AT2G32650 Phypa1|28350  
AT1G78620 Phypa1|38950,Phypa1|28430  
AT3G52760,AT2G36300 Phypa1|32224,Phypa1|35943,Phypa1|24885  
AT5G15290,AT1G14160,AT3G11550,AT5G06200,AT2G36100,AT2G27370,AT4G25040,AT4G15610,AT3G06390,AT5G44550,AT4G20390,AT1G03700,AT4G03540 Phypa1|24097,Phypa1|2813,Phypa1|24039,Phypa1|32033  
AT2G34690,AT4G39670 Phypa1|39349  
AT4G15530 Phypa1|36206  
Phypa1|1547,Phypa1|1304  
Phypa1|23399,Phypa1|19370  
AT4G22756,AT4G12110,AT4G22753 Phypa1|37868,Phypa1|10138  
AT1G07420,AT2G29390 Phypa1|38423,Phypa1|28005  
AT1G17160 Phypa1|553,Phypa1|37474  
AT5G66050 Phypa1|37905,Phypa1|36393  
AT1G75380,AT1G19660  
Phypa1|613,Phypa1|27873,Phypa1|1981,Phypa1|1082,Phypa1|26653,Phypa1|10823,Phypa1|25275  
AT4G26420,AT4G26460,AT3G44860,AT3G44870,AT3G44840,AT1G66690,AT1G66700,AT1G66720,AT5G38100,AT5G38780,AT5G37970,AT5G37990,AT1G68040,AT1G15125 Phypa1|1048  
AT2G47990 Phypa1|33143  
AT3G09660  
AT1G44900 Phypa1|36259  
Phypa1|30957  
AT5G44635 Phypa1|29025  
Phypa1|904  
AT2G14050 Phypa1|25797  
AT4G02060 Phypa1|36298  
AT5G46280 Phypa1|24769  
AT2G07690 Phypa1|30250  
AT2G16440 Phypa1|34357  
AT1G16330  
AT4G35620,AT2G17620,AT1G20590,AT1G20610,AT1G76310 Phypa1|36915,Phypa1|37823  
AT1G14750  
AT5G43080,AT1G47210,AT1G47230,AT1G47220,AT2G01310  
AT1G34460,AT5G06150,AT3G11520,AT4G37490,AT2G26760  
AT5G11300,AT5G25380,AT1G80370,AT1G15570  
Phypa1|39414,Phypa1|27143,Phypa1|1426,Phypa1|10804,Phypa1|28271,Phypa1|28505,Phypa1|2682,Phypa1|31159,Phypa1|23850,Phypa1|28276  
AT1G44110,AT1G77390  
AT5G15880 Phypa1|32575  
AT1G73970 Phypa1|32652  
AT4G05420,AT4G21100 Phypa1|39323,Phypa1|21411  
AT3G50620,AT4G34420,AT2G15730 Phypa1|25355,Phypa1|37922,Phypa1|24537,Phypa1|36607  
AT2G46000 Phypa1|1553  
AT1G79070 Phypa1|802  
AT3G07020 Phypa1|37758,Phypa1|29710,Phypa1|37395,Phypa1|27653  
AT1G43620 Phypa1|27262  
AT4G15010 Phypa1|15708,Phypa1|34829  
AT1G21600 Phypa1|28915  
Phypa1|31423  
AT2G16710,AT2G36260 Phypa1|36322  
AT3G49290,AT5G24310,AT5G42030 Phypa1|27232  
AT1G13810,AT1G67660 Phypa1|36198  
AT1G18720,AT1G74440 Phypa1|2614,Phypa1|24221,Phypa1|27538  
AT5G24860,AT5G10625,AT4G31380 Phypa1|37889,Phypa1|28552,Phypa1|24532  
AT1G56700,AT1G23440 Phypa1|3033,Phypa1|2516  
AT5G49220,AT1G15030,AT2G01260,AT1G73210,AT1G17830,AT1G03610,AT4G03420,AT4G28150,AT5G08360,AT5G23380,AT4G16100 Phypa1|29709,Phypa1|25293,Phypa1|7142,Phypa1|36224  
AT1G70230  
AT1G48880 Phypa1|1431  
AT3G02440,AT5G15900,AT5G15890,AT3G28150  
AT4G25360,AT5G51640 Phypa1|30633  
AT4G11090,AT4G23790,AT4G01080,AT1G01430  
Phypa1|30098,Phypa1|27593,Phypa1|25362,Phypa1|28367,Phypa1|35911,Phypa1|3409,Phypa1|107  
AT5G64470 Phypa1|29820  
Phypa1|496,Phypa1|991,Phypa1|85,Phypa1|86,Phypa1|91  
AT3G11570,AT5G06230  
AT3G06080,AT5G19160  
AT2G31120,AT5G40180,AT5G64480,AT2G31110  
AT5G06700,AT3G12060,AT5G49340,AT1G60790,AT5G20590,AT3G62390  
AT1G73140,AT5G01360,AT5G01620,AT2G38320,AT2G40320,AT3G11030,AT2G40150,AT3G55990,AT2G40160,AT3

G54260,AT5G58600,AT2G30010,AT3G14850,AT2G42570,AT2G34070,AT1G29050,AT2G30900,AT1G78710  
AT2G14530  
AT2G37720,AT5G64020,AT5G20680 Phypa1|37022,Phypa1|24771  
AT5G23330,AT5G08340 Phypa1|28323,Phypa1|17202  
AT2G22360,AT4G39960 Phypa1|36959,Phypa1|30386,Phypa1|2720  
AT2G17880,AT4G36040,AT3G13310  
AT5G18140 Phypa1|33026  
AT3G17830  
AT5G48030 Phypa1|1849,Phypa1|24781  
AT1G28210  
Phypa1|18268,Phypa1|7538,Phypa1|34661  
AT1G80030 Phypa1|24018,Phypa1|475  
Phypa1|5216  
AT4G09350  
AT5G59610 Phypa1|1714,Phypa1|10699  
Phypa1|33910  
AT1G25540 Phypa1|17317,Phypa1|34895  
AT5G11560Phypa1|36782  
AT5G58240 Phypa1|29756  
AT5G37960,AT5G17000,AT5G16970,AT5G16990,AT5G16980,AT3G03080,AT1G26320,AT5G37940,AT5G38000,AT5  
G37980,AT5G16960,AT3G59845,AT1G65560 Phypa1|36396  
Phypa1|29590  
AT5G16210 Phypa1|25678,Phypa1|36320,Phypa1|1749  
AT1G55535,AT3G13420 Phypa1|4131,Phypa1|681,Phypa1|1119  
Phypa1|22018  
AT5G38360 Phypa1|228  
AT1G18800,AT1G74560 Phypa1|24530,Phypa1|35942  
AT2G35480,AT1G32260 Phypa1|38455,Phypa1|252  
AT2G17020,AT1G55590 Phypa1|34578  
AT3G14920,AT5G05480 Phypa1|5407,Phypa1|1386,Phypa1|26805,Phypa1|1793  
AT4G00900 Phypa1|38797,Phypa1|39444,Phypa1|38809  
Phypa1|25759  
AT1G07810,AT1G07670  
AT2G41560,AT3G57330,AT2G22950,AT4G37640,AT1G27770 Phypa1|25885  
Phypa1|2745,Phypa1|39535,Phypa1|38206  
Phypa1|39269  
AT5G53010  
Phypa1|36384  
Phypa1|22929  
Phypa1|6770  
Phypa1|31480,Phypa1|31129  
Phypa1|31128  
AT3G63380,AT3G22910  
AT5G57110,AT4G29900,AT3G21180  
Phypa1|11221  
AT1G10130 Phypa1|39418  
Phypa1|12746,Phypa1|5663  
Phypa1|24484,Phypa1|35108,Phypa1|23784  
AT3G05090 Phypa1|10813,Phypa1|38832,Phypa1|2580,Phypa1|26747  
AT5G14220 Phypa1|26146  
Phypa1|31086  
Phypa1|30733  
AT3G10050 Phypa1|38045  
Phypa1|22011  
Phypa1|31104  
AT5G22870,AT4G09590,AT2G35970,AT2G35960,AT3G52470,AT3G11660,AT5G06330,AT5G05657,AT5G22200,AT3  
G44220,AT5G53730,AT4G01410,AT2G27270 Phypa1|32540  
Phypa1|30780  
Phypa1|37588  
Phypa1|25225  
AT5G67420,AT3G49940 Phypa1|2106  
AT4G37540 Phypa1|2111  
AT1G68510,AT1G67100,AT3G02550 Phypa1|8729,Phypa1|8620,Phypa1|14022  
AT1G43710 Phypa1|38579,Phypa1|38239  
AT2G22270,AT4G39860,AT1G78150,AT1G35780 Phypa1|33688,Phypa1|38121,Phypa1|7344  
AT5G51030,AT5G61830 Phypa1|27204,Phypa1|26724  
AT2G24190,AT3G61220,AT1G01800 Phypa1|7286,Phypa1|9297,Phypa1|11093  
AT3G59710  
Phypa1|20870  
AT1G17850 Phypa1|507  
AT4G36890,AT5G67230 Phypa1|26970,Phypa1|1404,Phypa1|1437  
AT2G25490,AT5G25350 Phypa1|38007,Phypa1|28777  
AT4G15475 Phypa1|26112  
Phypa1|15510,Phypa1|15511  
AT4G30260,AT2G18840 Phypa1|2416,Phypa1|31523,Phypa1|34937  
AT5G16870,AT3G03010  
AT4G32900 Phypa1|39283  
Phypa1|264  
Phypa1|2035  
AT1G05820,AT2G43070  
Phypa1|11200  
AT1G63690,AT1G01650 Phypa1|37192,Phypa1|39046,Phypa1|27520,Phypa1|24303

AT5G05350,AT3G10980 Phypa1|39631,Phypa1|1836,Phypa1|76,Phypa1|56  
AT3G03070 Phypa1|29790,Phypa1|25186  
AT3G63270,AT3G55350 Phypa1|30643  
AT1G23890,AT3G14860,AT1G70280,AT1G23880,AT5G14890 Phypa1|32898  
AT2G39950 Phypa1|16823  
AT5G47480,AT5G47490 Phypa1|35842,Phypa1|34177  
AT5G62840 Phypa1|28833  
AT3G44160,AT3G48620 Phypa1|18577  
AT5G19620 Phypa1|24273  
AT1G33660  
AT4G32320  
AT4G35000 Phypa1|36174  
AT1G77490,AT4G08390 Phypa1|39710  
AT3G09640,AT1G07890 Phypa1|2471,Phypa1|28337  
Phypa1|29676  
AT4G35970  
AT4G04670 Phypa1|29841  
AT5G37760  
AT3G04960,AT4G27980,AT3G05110 Phypa1|33046,Phypa1|3349  
Phypa1|682  
AT5G37380 Phypa1|39276  
Phypa1|35134  
AT5G18750,AT3G06340  
AT2G01710  
AT5G62780,AT4G19570,AT5G37750,AT5G37440,AT4G19590,AT4G19580  
AT2G35540 Phypa1|18557,Phypa1|34880  
Phypa1|1668  
AT3G04980,AT5G27240  
AT1G09260 Phypa1|33382  
AT2G25560,AT2G05230,AT2G05250,AT5G35753,AT5G50115,AT5G53150  
Phypa1|26313  
AT1G70590 Phypa1|1057  
AT1G80290 Phypa1|29361  
AT2G16800,AT4G35080 Phypa1|24668,Phypa1|26329,Phypa1|1107,Phypa1|27529,Phypa1|28536  
AT5G37580,AT5G37590 Phypa1|24572  
AT5G50190,AT4G30090,AT4G31340,AT2G24420  
Phypa1|1986,Phypa1|1039,Phypa1|33744,Phypa1|17944,Phypa1|1974  
AT4G37550,AT4G37560 Phypa1|39300  
AT5G41880 Phypa1|27271  
AT2G19680,AT4G29480,AT4G26210 Phypa1|33659,Phypa1|37210  
AT2G46580 Phypa1|39068  
AT3G20650 Phypa1|26241  
AT5G13420 Phypa1|6047,Phypa1|23955  
AT1G48050 Phypa1|37152  
AT4G04910 Phypa1|34974,Phypa1|30414,Phypa1|37981,Phypa1|19709,Phypa1|6594  
AT3G56330 Phypa1|24899  
AT3G27130 Phypa1|31816  
AT4G17760 Phypa1|38708  
AT4G35985,AT2G17840,AT3G51250  
Phypa1|21252,Phypa1|966,Phypa1|37774,Phypa1|997,Phypa1|995,Phypa1|24933,Phypa1|38129  
AT4G15450,AT3G21600,AT3G21590 Phypa1|39490,Phypa1|520,Phypa1|20729,Phypa1|13811  
AT1G56190,AT3G12780,AT1G79550 Phypa1|34630,Phypa1|38634,Phypa1|2937,Phypa1|17010  
Phypa1|30806  
AT5G14060,AT3G02020,AT5G13280 Phypa1|29746,Phypa1|28491,Phypa1|23116,Phypa1|31215  
AT1G49710,AT3G19280 Phypa1|38433  
AT3G07750 Phypa1|37405  
AT4G13210,AT3G24670,AT5G48900,AT3G07010,AT4G13710,AT1G04680,AT3G24230,AT4G24780,AT5G63180,AT1G67750,AT3G27400,AT5G55720,AT3G53190,AT5G04310,AT3G54920,AT3G01270,AT5G15110,AT2G02720,AT1G14420  
Phypa1|19990,Phypa1|38833,Phypa1|28633,Phypa1|3091,Phypa1|36721,Phypa1|27683,Phypa1|7018,Phypa1|36463,Phypa1|28956,Phypa1|39332  
AT5G09280  
AT1G30350,AT1G11920,AT4G22080,AT4G22090  
Phypa1|2852,Phypa1|2853,Phypa1|24328,Phypa1|9272,Phypa1|24447  
Phypa1|762  
Phypa1|21296  
Phypa1|26891,Phypa1|713,Phypa1|1151  
Phypa1|26243,Phypa1|24780  
AT3G55140,AT3G09540 Phypa1|38494  
Phypa1|28588,Phypa1|35630  
Phypa1|17609,Phypa1|25515,Phypa1|20813,Phypa1|27323,Phypa1|27317  
AT1G67570 Phypa1|10957  
AT4G03820,AT4G22270,AT1G50630,AT3G20300,AT2G21080  
Phypa1|24644,Phypa1|28060,Phypa1|37787,Phypa1|12598,Phypa1|23911  
AT2G17790,AT3G51310,AT1G75850 Phypa1|38126,Phypa1|35367  
AT2G40290,AT5G05470 Phypa1|38008,Phypa1|8820  
AT5G19150 Phypa1|23034,Phypa1|25778  
AT1G08750 Phypa1|34936  
AT5G49950,AT1G34340 Phypa1|29318,Phypa1|2512  
AT3G50790 Phypa1|29895,Phypa1|28564  
AT3G55070 Phypa1|29738,Phypa1|23897  
AT2G20515 Phypa1|25632

AT5G12370 Phypa1|25666,Phypa1|37925  
 AT3G57320 Phypa1|34468  
 AT1G51610 Phypa1|20521,Phypa1|28344  
 AT4G01210,AT5G04480 Phypa1|36239,Phypa1|10  
 AT1G68420,AT5G38750 Phypa1|30593  
 AT5G56680,AT1G70980 Phypa1|23821,Phypa1|2657  
 AT3G07420  
 AT4G17300 Phypa1|25526  
 AT3G23700 Phypa1|27424,Phypa1|29594  
 AT1G79810 Phypa1|37929  
 AT4G32690 Phypa1|39571,Phypa1|38555  
 AT5G40530 Phypa1|25231  
 AT2G36320,AT3G52800,AT2G27580,AT4G25380,AT4G12040,AT4G22820,AT1G12440,AT4G14225,AT3G12630  
 Phypa1|23734,Phypa1|35021,Phypa1|26269,Phypa1|2159,Phypa1|28840  
 AT1G51200 Phypa1|37206,Phypa1|37272  
 AT3G27460,AT5G40550 Phypa1|38139,Phypa1|36151  
 AT3G03420 Phypa1|5108,Phypa1|30523  
 AT5G03570,AT2G38460 Phypa1|24796  
 AT5G45590 Phypa1|32282  
 AT1G15780,AT1G15770,AT2G10440  
 AT1G15790 Phypa1|35539,Phypa1|10532,Phypa1|33641  
 Phypa1|7689  
 Phypa1|37403,Phypa1|30615,Phypa1|5354  
 AT5G04710 Phypa1|24388  
 AT5G60160 Phypa1|25395  
 AT1G24040 Phypa1|31654  
 AT2G37035 Phypa1|32901  
 AT4G27750 Phypa1|33293  
 AT2G24820 Phypa1|24854,Phypa1|37360  
 AT5G46430,AT4G18100 Phypa1|38835,Phypa1|39768,Phypa1|33648,Phypa1|24036,Phypa1|39108  
 AT3G23350 Phypa1|39778,Phypa1|619  
 AT1G08670,AT3G46540 Phypa1|1516,Phypa1|34986,Phypa1|1520,Phypa1|625  
 AT5G49970 Phypa1|37979  
 AT4G30620,AT2G24020 Phypa1|34622,Phypa1|33369,Phypa1|32595  
 AT1G26180 Phypa1|39776  
 AT5G56950,AT4G26110,AT2G19480,AT3G13782 Phypa1|24332,Phypa1|39613  
 AT1G01510 Phypa1|1372,Phypa1|17876,Phypa1|26421,Phypa1|938  
 AT4G34060,AT3G10010,AT5G04560,AT2G36490 Phypa1|29201  
 Phypa1|30863  
 Phypa1|25034  
 Phypa1|4789  
 AT3G18860 Phypa1|32527  
 AT2G34200,AT5G59000,AT5G05830,AT2G37950,AT5G01070 Phypa1|722,Phypa1|733,Phypa1|1169  
 AT4G31530 Phypa1|1044  
 AT5G14710 Phypa1|39157  
 AT1G74070 Phypa1|35958  
 AT3G55030,AT2G39290 Phypa1|2289,Phypa1|36659  
 AT1G66970,AT1G66980,AT4G26690,AT5G55480,AT3G20520,AT5G58170,AT5G58050 Phypa1|32109  
 Phypa1|25325  
 Phypa1|27177  
 AT2G14045 Phypa1|29179,Phypa1|826  
 AT3G10130 Phypa1|28389  
 AT5G49810 Phypa1|25975,Phypa1|33362  
 AT5G51170Phypa1|28670  
 AT4G31700,AT5G10360  
 Phypa1|1723,Phypa1|29448,Phypa1|17891,Phypa1|39454,Phypa1|32372,Phypa1|39572  
 AT4G20850 Phypa1|29856,Phypa1|24424,Phypa1|21756,Phypa1|21816  
 AT1G28150 Phypa1|35241  
 AT5G47560 Phypa1|27548  
 AT1G04950,AT1G54360 Phypa1|2650  
 Phypa1|14131  
 AT5G05570 Phypa1|32058  
 AT1G77180 Phypa1|36603  
 AT2G04900 Phypa1|25069,Phypa1|25077,Phypa1|31854,Phypa1|31853  
 AT2G39725 Phypa1|28219  
 AT1G71080,AT5G38050 Phypa1|31976,Phypa1|17151  
 AT4G14570 Phypa1|1364,Phypa1|36977,Phypa1|19872,Phypa1|37065,Phypa1|19355  
 AT5G18070 Phypa1|39346  
 AT4G28950,AT5G62880,AT3G48040,AT2G44690,AT5G45970,AT4G35020,AT2G17800,AT4G35950,AT3G51300,AT1  
 G75840,AT1G20090 Phypa1|36530,Phypa1|39055,Phypa1|35050,Phypa1|37422  
 Phypa1|396  
 AT3G06950 Phypa1|2577  
 AT3G01435 Phypa1|27701,Phypa1|39247  
 AT5G13840 Phypa1|28453,Phypa1|2814,Phypa1|39248,Phypa1|27703  
 Phypa1|32421  
 AT4G11920,AT4G22910  
 AT4G33270,AT4G33260,AT5G27080,AT5G26900,AT5G27570,AT5G27945  
 Phypa1|24759,Phypa1|26874,Phypa1|2912,Phypa1|2562,Phypa1|27137,Phypa1|25495  
 AT2G28600 Phypa1|32053  
 AT3G07480 Phypa1|283  
 AT5G13390 Phypa1|25762  
 AT2G37970 Phypa1|36141

AT4G16440 Phypa1|29326  
AT5G40680,AT3G27150,AT5G60570,AT1G14330,AT2G02870,AT1G26930,AT1G74510  
Phypa1|39037,Phypa1|37249  
AT1G69523,AT1G69526  
Phypa1|26879  
AT1G69520 Phypa1|23319  
AT1G53530 Phypa1|37063  
AT1G23465  
AT3G08980 Phypa1|784  
AT4G31370,AT2G24450,AT3G12660,AT2G45470,AT3G60900,AT5G55730,AT4G12730,AT3G46550  
Phypa1|14716,Phypa1|24982,Phypa1|2039  
AT3G53970,AT1G48530 Phypa1|28380  
AT3G52790,AT5G62150,AT4G25433 Phypa1|853  
AT1G74640 Phypa1|29009  
AT2G44280,AT3G60070 Phypa1|37047  
AT2G42030,AT3G58030,AT2G44410 Phypa1|305  
Phypa1|29226,Phypa1|821  
AT3G53000,AT3G61060,AT1G12710,AT1G63090,AT5G52120 Phypa1|30362,Phypa1|2000,Phypa1|237  
AT3G15640,AT1G52710,AT1G80230 Phypa1|23892,Phypa1|29622,Phypa1|18363  
AT1G02140 Phypa1|24165,Phypa1|37173,Phypa1|26609  
AT5G64440 Phypa1|24835  
Phypa1|9227,Phypa1|24442,Phypa1|3273,Phypa1|24652  
Phypa1|22591,Phypa1|32385  
AT3G58490 Phypa1|25333,Phypa1|24859  
AT5G28615,AT4G13470,AT1G34440,AT5G46120,AT3G27590,AT5G59060,AT2G07760,AT5G28823,AT5G32613,AT5  
G16486,AT1G43760,AT1G19030,AT5G13655,AT3G17200,AT5G41505,AT3G49280,AT2G15600,AT1G32390,AT1G47  
783,AT2G03540,AT4G11710,AT1G35570,AT4G05145,AT5G52065,AT2G40680,AT1G21330,AT1G62890,AT5G49090,  
AT1G54955,AT3G25727,AT2G02520,AT1G43730,AT4G04650,AT4G05095,AT5G18880,AT1G60720,AT1G33710,AT3  
G25720,AT4G10613,AT3G43760,AT1G43570 Phypa1|12930  
AT1G67930 Phypa1|25850,Phypa1|28262  
AT1G09280 Phypa1|30373  
Phypa1|18466  
AT4G35570,AT2G17560  
Phypa1|34813  
AT3G51880 Phypa1|811,Phypa1|812,Phypa1|23881  
AT5G23405,AT5G23420,AT5G05330,AT2G34450  
AT1G20693,AT1G20696  
AT3G09680,AT5G02960 Phypa1|38669,Phypa1|38049,Phypa1|37863,Phypa1|37242,Phypa1|37798  
Phypa1|25239  
AT4G33590,AT4G33600 Phypa1|2266,Phypa1|27083,Phypa1|513  
AT5G63070  
Phypa1|4939  
AT1G33850,AT5G43640,AT5G09500,AT5G09490,AT1G04270,AT5G09510  
Phypa1|24016,Phypa1|36484,Phypa1|36067,Phypa1|27312,Phypa1|2892  
AT2G30410 Phypa1|27803,Phypa1|27733,Phypa1|9463,Phypa1|29779  
AT3G19340,AT5G13940 Phypa1|28169,Phypa1|26544  
AT5G37670 Phypa1|37197  
Phypa1|2751,Phypa1|7354  
AT5G12030,AT5G12020 Phypa1|6271,Phypa1|38386,Phypa1|3675  
AT4G10250,AT1G59860,AT1G07400,AT2G29500,AT3G46230,AT1G53540,AT5G59720  
Phypa1|4230,Phypa1|31680,Phypa1|24748,Phypa1|35995,Phypa1|38052,Phypa1|38841,Phypa1|27579,P  
hypa1|28225,Phypa1|39279,Phypa1|38001,Phypa1|1619,Phypa1|8392  
Phypa1|28727  
AT1G54050 Phypa1|24894  
AT1G52560 Phypa1|22628  
Phypa1|27823  
AT4G27670  
AT4G21870  
AT2G19310 Phypa1|4122,Phypa1|1660,Phypa1|1658,Phypa1|1669,Phypa1|31987  
AT1G54010,AT1G54000,AT1G54020,AT3G14210,AT3G14220,AT1G54030  
AT1G71120  
AT5G55050  
AT2G04020  
AT4G16220  
AT4G16230,AT5G41890  
Phypa1|32261  
Phypa1|37274  
AT2G31550,AT2G31540,AT1G58430,AT2G30220,AT2G30310,AT2G24560,AT1G06990,AT5G45960,AT2G40250,AT3  
G16370,AT5G03810,AT5G03820,AT5G22810,AT3G53100  
Phypa1|28826,Phypa1|2920,Phypa1|2544,Phypa1|26312,Phypa1|29871,Phypa1|2600  
Phypa1|2675,Phypa1|36747,Phypa1|4098,Phypa1|39177,Phypa1|25848,Phypa1|26696,Phypa1|25528  
Phypa1|21403,Phypa1|21257,Phypa1|3429,Phypa1|35844  
AT1G71250,AT5G08460,AT1G71691,AT1G29660,AT1G29670,AT5G45670,AT4G18970,AT1G33811,AT5G15720,AT2  
G19050,AT2G19060,AT4G30140,AT2G19010,AT2G03980  
Phypa1|18502  
Phypa1|36728,Phypa1|38458,Phypa1|17446  
Phypa1|25523  
AT5G45950,AT2G42990,AT4G26790,AT2G04570  
AT3G09930,AT5G03610,AT5G03600 Phypa1|29711  
Phypa1|558  
AT5G37690,AT1G74460  
Phypa1|26924

Phypa1|16779  
Phypa1|9399,Phypa1|24886,Phypa1|28086  
AT2G23540,AT3G50400 Phypa1|29939  
AT4G10950 Phypa1|28580  
Phypa1|9115,Phypa1|15417  
AT1G53940,AT5G40990,AT1G53990,AT3G14225,AT1G53920  
Phypa1|15524,Phypa1|29055,Phypa1|28713  
Phypa1|26277,Phypa1|37178  
AT1G20130,AT1G20120,AT1G75900,AT1G75880,AT1G75890,AT1G59406,AT1G59030,AT1G58725,AT3G43550,AT3  
G43570,AT1G58480,AT3G14820,AT5G42170,AT1G23500,AT1G73610,AT5G63170,AT1G75920,AT1G75910,AT1G75  
930  
AT4G28780,AT3G04290,AT5G33370,AT5G18430  
Phypa1|137  
Phypa1|21694  
AT5G42160 Phypa1|30192  
Phypa1|589  
Phypa1|7160  
AT5G03770 Phypa1|24110  
AT4G31115,AT5G04440 Phypa1|26067  
AT2G30280 Phypa1|33313  
Phypa1|34346  
Phypa1|26320,Phypa1|29295  
AT2G44970  
AT3G47120 Phypa1|38320  
AT3G20680 Phypa1|32279  
AT1G31330 Phypa1|27039,Phypa1|2078,Phypa1|30209,Phypa1|2077  
Phypa1|28965  
AT5G22620 Phypa1|26267  
AT3G06550,AT5G46340,AT1G29890,AT2G34410,AT3G06547 Phypa1|3940,Phypa1|38760,Phypa1|39634  
AT2G45950,AT3G61415 Phypa1|28017  
AT5G58040,AT3G66652 Phypa1|32351  
AT1G66260,AT5G37720,AT5G59950,AT5G02530 Phypa1|35650,Phypa1|26943,Phypa1|2661,Phypa1|24554  
AT1G69400  
AT1G15850,AT1G80670 Phypa1|32416  
Phypa1|25647,Phypa1|28101  
AT1G49910,AT3G19590 Phypa1|23845,Phypa1|23856  
AT5G55140 Phypa1|37345,Phypa1|37344  
Phypa1|19430  
Phypa1|21297  
AT1G80460 Phypa1|26631  
AT4G15802 Phypa1|1707,Phypa1|1706,Phypa1|9991  
AT5G58070 Phypa1|39751  
AT2G38470  
AT5G26170  
Phypa1|2387  
Phypa1|296  
Phypa1|1693  
AT2G24570,AT4G31550  
Phypa1|804  
AT1G30650,AT2G34830,AT5G45270,AT4G01250,AT4G23550,AT5G52830  
AT5G07100  
Phypa1|626,Phypa1|1150,Phypa1|571  
Phypa1|2217  
Phypa1|25426  
AT5G64810,AT2G21900  
AT4G26440,AT5G56270  
Phypa1|28171  
AT1G69310  
AT2G23320  
Phypa1|29290  
AT2G04880  
AT4G26640 Phypa1|803  
Phypa1|28433  
AT2G30590,AT3G04670,AT5G28650  
AT4G30935  
AT2G37260,AT2G03340,AT1G13960,AT3G01080  
Phypa1|30558  
AT4G24240 Phypa1|28501,Phypa1|23675,Phypa1|38694,Phypa1|26215,Phypa1|26056  
AT5G43290 Phypa1|26875  
AT1G80840,AT2G25000,AT4G31800  
AT3G56390 Phypa1|1312  
AT4G39410 Phypa1|359  
Phypa1|25811,Phypa1|2213  
AT2G47260 Phypa1|25949  
AT1G29860,AT5G46350,AT4G18170  
AT4G11070,AT4G23810,AT5G24110,AT2G40740,AT2G46400,AT1G66600,AT1G66560,AT1G66550,AT1G80590,AT5  
G22570,AT5G01900,AT3G56400,AT2G40750  
AT3G62340 Phypa1|874  
Phypa1|1320  
AT1G64000,AT5G41570,AT2G46130,AT1G55600,AT5G13080,AT3G01970  
Phypa1|24888  
AT5G49520

AT2G30250  
 AT1G29280,AT3G58710  
 AT1G68150 Phypa1|28424  
 AT2G44745  
 AT3G32090 Phypa1|372  
 Phypa1|1343  
 AT5G05730,AT3G55870,AT2G29690 Phypa1|37367,Phypa1|28372,Phypa1|26952  
 Phypa1|23420  
 AT2G28880 Phypa1|37342  
 Phypa1|22472  
 AT1G68190,AT1G60250,AT2G32310,AT1G05290,AT2G47890,AT2G33500,AT1G28050  
 AT4G15250,AT3G21880,AT5G48250,AT3G07650 Phypa1|25477,Phypa1|25825,Phypa1|1459,Phypa1|1461  
 Phypa1|29302  
 AT1G04510,AT2G33340 Phypa1|38256,Phypa1|36693,Phypa1|4965  
 AT1G17870 Phypa1|39690,Phypa1|28342  
 AT5G17250 Phypa1|37713  
 AT2G18040 Phypa1|32374,Phypa1|24027  
 AT1G03090 Phypa1|36156  
 Phypa1|30007  
 Phypa1|30937  
 AT5G35360 Phypa1|25180,Phypa1|24755,Phypa1|4220  
 Phypa1|27639  
 Phypa1|157  
 AT5G42340  
 AT1G29340,AT5G01830  
 AT2G23140,AT5G67340 Phypa1|29876,Phypa1|29296  
 Phypa1|35325,Phypa1|1318  
 Phypa1|36454,Phypa1|36020,Phypa1|36137,Phypa1|30325,Phypa1|26287,Phypa1|26981  
 AT3G20170  
 AT5G58680,AT3G01400  
 AT1G01670,AT1G01680,AT1G01660,AT1G15165  
 AT4G21350  
 AT1G08315  
 Phypa1|30167  
 AT5G65200,AT3G47820,AT5G62560,AT5G40140 Phypa1|30248  
 Phypa1|25800  
 AT2G25130,AT4G31890 Phypa1|36997  
 AT1G24330,AT1G67530,AT1G27910 Phypa1|27422,Phypa1|30972  
 AT3G19380,AT1G49780 Phypa1|32913,Phypa1|29397,Phypa1|4056,Phypa1|24907,Phypa1|3339  
 AT3G61390,AT2G45920 Phypa1|7773  
 AT5G64660,AT5G09800,AT3G18710  
 Phypa1|4358  
 AT1G71020,AT1G23030  
 AT3G54790  
 Phypa1|373  
 AT3G46510,AT2G28830,AT3G54850 Phypa1|444,Phypa1|929,Phypa1|37334,Phypa1|2746,Phypa1|598  
 AT4G12710,AT3G03440,AT5G14510  
 AT3G07360,AT5G18340,AT5G18320,AT5G18330  
 AT5G65920,AT3G49810 Phypa1|26701,Phypa1|1430,Phypa1|16244,Phypa1|37565  
 AT4G16490  
 AT1G10560,AT1G60190  
 AT4G36550  
 AT5G60700 Phypa1|24959,Phypa1|38366,Phypa1|24358  
 AT1G05055 Phypa1|36779  
 AT3G27325 Phypa1|27817,Phypa1|36970,Phypa1|1753  
 AT2G44750,AT1G02880 Phypa1|29250,Phypa1|27762,Phypa1|21583  
 Phypa1|11955  
 AT5G48370,AT2G30720 Phypa1|39395,Phypa1|498,Phypa1|38072  
 AT4G38020 Phypa1|22303,Phypa1|36424  
 AT1G80820,AT1G15950 Phypa1|24453  
 AT2G33600,AT2G33590,AT1G76470  
 AT2G23910,AT4G30470,AT5G14700 Phypa1|28913,Phypa1|2708,Phypa1|25973  
 AT4G35420 Phypa1|28224  
 Phypa1|23275  
 AT1G51410,AT5G19440,AT1G09500,AT1G09510,AT1G09490,AT1G09480,AT1G66800 Phypa1|38776  
 AT5G58490,AT2G02400  
 AT5G42800,AT2G45400,AT1G61720,AT4G27250  
 AT1G25460,AT1G68540 Phypa1|38991  
 AT1G67620 Phypa1|15654  
 AT3G56990 Phypa1|28327  
 AT4G32750 Phypa1|37423,Phypa1|38775  
 AT1G80510 Phypa1|32890  
 AT2G40420,AT3G56200  
 AT3G30390,AT5G38820 Phypa1|24471,Phypa1|37893,Phypa1|18427  
 Phypa1|32438,Phypa1|34500  
 AT1G11520,AT4G21660 Phypa1|27430,Phypa1|38146  
 AT2G22620,AT4G37950,AT1G65210,AT4G38030,AT4G24430,AT1G09910,AT1G09890,AT1G09880  
 Phypa1|26531,Phypa1|37125  
 AT5G63540 Phypa1|34633  
 AT3G63410 Phypa1|26207,Phypa1|1457  
 Phypa1|20580  
 AT4G27910,AT5G53430,AT3G61740 Phypa1|29168,Phypa1|26180



Phypa1|27514  
Phypa1|28062  
Phypa1|25278,Phypa1|38837  
AT5G42400  
Phypa1|11628,Phypa1|273  
Phypa1|17483  
AT1G77290 Phypa1|37303  
AT2G37680 Phypa1|18440,Phypa1|28672  
AT5G15700,AT1G68990,AT2G24120 Phypa1|39423,Phypa1|37776,Phypa1|39441  
AT3G47620,AT1G69690,AT5G08330,AT5G23280,AT1G72010,AT1G35560,AT1G58100,AT3G45150,AT3G27010,AT5  
G41030,AT2G37000,AT5G51910,AT2G45680 Phypa1|35536,Phypa1|35791,Phypa1|19900,Phypa1|33243  
AT2G22890,AT1G62190,AT4G27030 Phypa1|1086  
AT2G04790 Phypa1|790  
AT5G09310 Phypa1|2164  
AT5G02140  
AT1G77700  
AT4G11650  
AT1G73620,AT1G18250  
AT5G40020  
AT4G38670,AT1G20030,AT1G75800,AT2G17860,AT4G36010,AT4G24180,AT4G38660,AT4G36000  
Phypa1|19029,Phypa1|25475  
Phypa1|30575,Phypa1|10623,Phypa1|37092  
AT5G38280  
AT5G24620,AT2G24810,AT1G19320,AT1G75050,AT1G75030,AT1G75040  
AT2G28790  
AT5G66680 Phypa1|38753  
AT5G41190Phypa1|33361  
AT5G16100 Phypa1|8325,Phypa1|31696  
AT1G11360,AT5G54430,AT4G27320 Phypa1|36339,Phypa1|27429,Phypa1|686,Phypa1|2311  
AT5G51340 Phypa1|37396,Phypa1|28183,Phypa1|6042  
AT2G15270 Phypa1|34881,Phypa1|33934  
Phypa1|24445,Phypa1|1080,Phypa1|26938  
AT3G08640,AT3G08630 Phypa1|1964  
AT3G01150,AT5G53180 Phypa1|58,Phypa1|27062  
AT1G16820,AT1G78900 Phypa1|24820,Phypa1|38207,Phypa1|38548  
AT1G28120 Phypa1|38744,Phypa1|36561  
AT1G48160 Phypa1|29954  
AT4G34700 Phypa1|31856  
Phypa1|18968  
AT1G58370,AT4G08160,AT1G10050 Phypa1|39030,Phypa1|18969  
AT2G33980,AT1G28960,AT5G45940 Phypa1|624  
AT3G11400,AT5G06000 Phypa1|37827,Phypa1|38794,Phypa1|29947  
AT5G19540 Phypa1|1878  
AT3G01780 Phypa1|38587,Phypa1|31621,Phypa1|33233  
AT4G21570,AT1G11200 Phypa1|24022  
AT1G32300,AT5G56490,AT5G56470,AT2G46750,AT2G46740,AT2G46760,AT5G11540  
Phypa1|16234,Phypa1|31333,Phypa1|33632  
AT5G50900,AT2G05810,AT1G61350,AT2G45720,AT1G01830  
Phypa1|37045,Phypa1|39160,Phypa1|32320,Phypa1|25285  
AT2G21280 Phypa1|27187  
AT1G55670 Phypa1|27080,Phypa1|38798  
AT1G43190 Phypa1|38490,Phypa1|26213  
AT2G22650 Phypa1|25501  
AT2G43990 Phypa1|34883  
Phypa1|25001  
AT5G11710,AT2G43160,AT3G59290 Phypa1|36412,Phypa1|32399  
AT4G01710 Phypa1|23869  
AT1G80360 Phypa1|24782  
Phypa1|1273,Phypa1|2384,Phypa1|1275  
AT4G34620 Phypa1|31340  
AT5G56940 Phypa1|24270  
AT2G22240,AT4G39800,AT5G10170 Phypa1|39481,Phypa1|38629  
AT4G21770 Phypa1|29540  
AT2G41950 Phypa1|33007  
AT3G44360,AT1G65080,AT3G44370 Phypa1|592  
AT2G36310 Phypa1|2508,Phypa1|28172  
Phypa1|30680  
AT1G05620 Phypa1|39633  
AT5G65000 Phypa1|28892  
AT3G48420 Phypa1|29388  
AT4G39970 Phypa1|36958  
AT3G22942,AT3G63420 Phypa1|32094  
AT3G23480,AT3G23470,AT3G23510,AT3G23530,AT3G23460  
Phypa1|37081  
Phypa1|23234  
Phypa1|31348,Phypa1|23288  
AT5G51970 Phypa1|30057,Phypa1|36376  
AT1G66000,AT1G66060,AT2G03010,AT4G16530,AT5G37420,AT5G37430,AT5G37920,AT5G37410,AT4G09440,AT5  
G37470,AT5G37460,AT5G37400,AT5G37650,AT1G66110 Phypa1|5764  
Phypa1|34659  
AT1G61620 Phypa1|37781,Phypa1|24010  
AT4G10310 Phypa1|9435

AT4G13200 Phypa1|33448  
 AT5G12260 Phypa1|49  
     Phypa1|31444  
 AT3G43340,AT2G39140 Phypa1|33358  
 AT4G00355,AT2G45980 Phypa1|35558  
 AT1G26120,AT3G02410,AT5G15860 Phypa1|26598,Phypa1|28866,Phypa1|26894,Phypa1|33983  
 AT3G16270 Phypa1|39785  
 AT2G32330,AT2G31580,AT2G32320 Phypa1|34036  
 AT5G39600 Phypa1|38412  
 AT3G05250 Phypa1|30338  
 AT5G19485 Phypa1|2863  
     Phypa1|35865  
 AT5G13710 Phypa1|39766  
 AT1G52380,AT3G15970 Phypa1|24334  
 AT5G26800,AT3G05810 Phypa1|35204  
 AT1G15340,AT3G15790  
     Phypa1|21988,Phypa1|32873,Phypa1|32874,Phypa1|34134,Phypa1|14298,Phypa1|14299,Phypa1|35655  
     Phypa1|24518  
 AT5G23450 Phypa1|13115,Phypa1|39399  
 AT2G21630  
 AT5G43670 Phypa1|38785  
 AT4G14160,AT3G23660,AT1G05520 Phypa1|3221,Phypa1|23971,Phypa1|39249,Phypa1|36579  
 AT2G35630 Phypa1|13409,Phypa1|23842  
 AT3G28155 Phypa1|33969  
 AT1G21140,AT3G43630,AT3G43660,AT1G76800,AT3G25190 Phypa1|14368,Phypa1|28145  
 AT3G29010 Phypa1|37799  
 AT1G04390 Phypa1|31880  
 AT4G35250 Phypa1|37415  
 AT1G08780 Phypa1|35485  
 AT4G29070 Phypa1|10450,Phypa1|12064  
 AT1G73010,AT1G17710,AT4G29530 Phypa1|36133  
 AT4G14965 Phypa1|32209  
 AT1G33680,AT4G10070 Phypa1|4336  
 AT5G26667,AT3G60180  
     Phypa1|36864,Phypa1|39307,Phypa1|30321  
     Phypa1|26138,Phypa1|30644,Phypa1|26565  
 AT4G25280 Phypa1|5387,Phypa1|26264  
     Phypa1|39040  
 AT4G21210  
 AT3G01200 Phypa1|31122  
 AT1G03060  
     Phypa1|1724,Phypa1|32926  
     Phypa1|28698,Phypa1|33760,Phypa1|26847  
 AT4G02660  
 AT1G77540,AT1G21770 Phypa1|859  
 AT2G33630 Phypa1|33160,Phypa1|39015  
 AT3G26690,AT1G12880,AT1G14860,AT2G01670,AT1G18300,AT1G73540,AT3G12600  
     Phypa1|38814,Phypa1|36903  
 AT1G02680 Phypa1|1239,Phypa1|838  
 AT4G23950,AT1G22882,AT1G71360 Phypa1|6869,Phypa1|34513  
 AT3G55250 Phypa1|2014  
 AT5G05010 Phypa1|31739,Phypa1|24150,Phypa1|38297,Phypa1|23686  
 AT2G40600 Phypa1|36652,Phypa1|12203  
 AT2G36305 Phypa1|24989  
 AT2G47960 Phypa1|32075  
 AT2G21330,AT4G38970  
 AT2G01140 Phypa1|28603,Phypa1|28616,Phypa1|29703,Phypa1|25693,Phypa1|30834  
     Phypa1|26266  
 AT4G26520,AT4G26530,AT3G52930,AT2G36460,AT5G03690  
     Phypa1|2608,Phypa1|26931,Phypa1|33739,Phypa1|36918  
 AT3G11750,AT5G62980,AT3G21730 Phypa1|24063  
 AT2G42160,AT2G27160,AT2G26000 Phypa1|36418  
 AT5G19950 Phypa1|11210  
 AT5G14105 Phypa1|26996,Phypa1|25518  
 AT5G11080,AT5G25270,AT5G42220 Phypa1|34444,Phypa1|32084  
 AT5G24650,AT3G49560 Phypa1|33435,Phypa1|33549  
 AT4G17260 Phypa1|2554,Phypa1|37726,Phypa1|29371,Phypa1|30492  
 AT1G50840,AT3G20540 Phypa1|39749,Phypa1|23846,Phypa1|37955  
 AT1G79950  
     Phypa1|24513  
 AT2G05635,AT1G20720,AT1G20750 Phypa1|11475  
 AT1G13820,AT5G39220 Phypa1|25256  
     Phypa1|31279  
 AT5G46160,AT1G17560 Phypa1|21032  
 AT3G06930,AT5G49020 Phypa1|24878,Phypa1|25913  
 AT5G52880 Phypa1|32177,Phypa1|1975  
 AT3G12140,AT5G06780,AT5G13020,AT2G44440 Phypa1|12141,Phypa1|27599  
 AT4G36980 Phypa1|6657,Phypa1|39573  
 AT3G12950 Phypa1|30392  
 AT2G35155,AT5G45030  
     Phypa1|2254,Phypa1|1828,Phypa1|14717  
 AT4G27585,AT5G54100 Phypa1|541

AT3G14930 Phypa1|24478  
Phypa1|30886,Phypa1|24601  
AT2G40490 Phypa1|37099  
AT2G33735  
AT2G20560,AT4G28480,AT3G08910,AT5G01390  
Phypa1|39648  
Phypa1|4294  
AT3G14200,AT1G72416,AT1G56300,AT1G71000  
AT1G11040,AT1G44160  
AT2G41000  
AT1G10350,AT1G59725,AT3G47940,AT5G25530  
Phypa1|3080,Phypa1|39277,Phypa1|37194,Phypa1|36865,Phypa1|39305  
Phypa1|813  
AT5G49060  
AT4G13830 Phypa1|28457,Phypa1|34103  
AT2G20550 Phypa1|1679  
AT5G16650 Phypa1|29212,Phypa1|26781  
Phypa1|25735  
Phypa1|844  
AT5G22450 Phypa1|35392,Phypa1|19352,Phypa1|35436,Phypa1|35244  
AT4G29790,AT2G19390  
Phypa1|35438  
AT1G09710,AT1G58220 Phypa1|33809  
AT5G47130,AT4G17580,AT5G47120 Phypa1|38849  
AT5G42870,AT3G09560 Phypa1|3457,Phypa1|32601  
AT4G31420,AT2G24500 Phypa1|29598,Phypa1|24707  
AT4G12230 Phypa1|1012  
Phypa1|30494,Phypa1|23556,Phypa1|30722  
AT5G40850 Phypa1|582  
Phypa1|23449  
Phypa1|30498  
AT5G48790 Phypa1|26442  
AT2G32030,AT2G32020,AT3G22560  
Phypa1|29682,Phypa1|31576,Phypa1|32549,Phypa1|19386,Phypa1|23452,Phypa1|11843,Phypa1|23205  
AT5G45110,AT4G19660  
AT4G26120,AT1G64280 Phypa1|1390,Phypa1|35874  
Phypa1|35873  
AT3G60620,AT2G45150 Phypa1|27713,Phypa1|27340  
AT3G59870,AT2G43945 Phypa1|14365,Phypa1|35397,Phypa1|28080  
AT4G30220 Phypa1|29124,Phypa1|38574  
AT1G52660,AT3G15700  
AT1G62630,AT1G63360,AT1G63350,AT5G63020,AT1G12220,AT1G12210,AT1G12280,AT4G10780,AT1G12290,AT1G61310,AT1G61180,AT1G61300,AT1G61190,AT1G51480,AT5G43730,AT5G43740,AT1G15890,AT5G05400,AT5G47260,AT5G47250,AT4G26090,AT4G27190,AT4G27220  
Phypa1|18892  
Phypa1|24369  
Phypa1|30001  
AT5G07470,AT5G61640,AT5G07460  
Phypa1|23887  
AT4G25130 Phypa1|35312,Phypa1|24111,Phypa1|27408  
Phypa1|15480  
AT2G18030 Phypa1|37466  
AT5G64160 Phypa1|32414  
AT1G08530,AT5G09995 Phypa1|32412,Phypa1|34519,Phypa1|320  
AT1G47780,AT1G47786,AT1G52695,AT1G52460,AT1G52440,AT1G52470,AT1G51300,AT3G15650,AT1G52700,AT5G20060 Phypa1|25482  
AT1G44780,AT4G08310 Phypa1|34298  
AT3G63460,AT1G18830 Phypa1|2898,Phypa1|29712  
Phypa1|18339  
AT5G07290,AT5G61960  
AT1G37140  
AT5G07930 Phypa1|33379  
Phypa1|26972,Phypa1|38795,Phypa1|29616  
AT2G42890  
AT3G26120,AT1G67770 Phypa1|50,Phypa1|468  
AT4G18120,AT1G29400  
AT5G59470,AT4G07390 Phypa1|36647,Phypa1|39116  
AT1G71480 Phypa1|25467  
AT5G01960 Phypa1|25302  
AT3G61540 Phypa1|39421  
AT1G75690 Phypa1|262,Phypa1|800  
AT3G11964Phypa1|27523  
AT5G55190,AT5G20020,AT5G20010,AT5G55080  
Phypa1|38409,Phypa1|39467,Phypa1|24842,Phypa1|2524,Phypa1|32720,Phypa1|36459  
AT1G77630,AT1G21880,AT2G17120 Phypa1|7993  
AT1G47640 Phypa1|23957  
AT1G72170,AT1G22520 Phypa1|2204,Phypa1|32934,Phypa1|1286,Phypa1|15528  
Phypa1|34372  
AT1G11800Phypa1|26110  
AT2G30710 Phypa1|13436  
AT2G40850,AT3G56600,AT1G13640,AT2G03890,AT1G26270 Phypa1|34045,Phypa1|25428  
AT4G28700,AT3G24290,AT3G24300,AT4G13510,AT1G64780

Phypa1|38159,Phypa1|35834,Phypa1|24143,Phypa1|25681,Phypa1|36325,Phypa1|38443  
Phypa1|30442  
Phypa1|9881  
AT4G30340,AT2G18730,AT5G57690 Phypa1|27451,Phypa1|29063  
AT1G52530 Phypa1|23825  
AT1G77160,AT1G77145  
AT1G12030,AT1G62420,AT3G07350,AT3G25240,AT2G20670,AT4G32480  
AT2G39650  
Phypa1|27503,Phypa1|652,Phypa1|2052,Phypa1|1345,Phypa1|1316,Phypa1|2041,Phypa1|1317,Phypa1|  
1319,Phypa1|34811,Phypa1|2044,Phypa1|1460  
AT1G21475 Phypa1|4483  
AT3G22970,AT4G14620,AT3G54550,AT2G38820  
Phypa1|2002,Phypa1|2016,Phypa1|151,Phypa1|2020,Phypa1|2308,Phypa1|1315,Phypa1|29134,Phypa1|  
196  
AT1G47580,AT4G31050 Phypa1|646  
AT1G04640 Phypa1|1141  
AT2G46900 Phypa1|25981,Phypa1|27179  
AT2G23820,AT1G26160 Phypa1|39525,Phypa1|25690  
AT1G27470,AT4G07410 Phypa1|38324,Phypa1|26808,Phypa1|15715  
AT2G40430 Phypa1|36049  
AT4G36050 Phypa1|32181,Phypa1|19221  
AT5G46030 Phypa1|24163,Phypa1|38771  
AT3G15190 Phypa1|734,Phypa1|258  
AT5G19330,AT5G13060 Phypa1|23880,Phypa1|23865  
AT3G18680 Phypa1|24833,Phypa1|2954  
AT3G10030 Phypa1|22186  
AT1G69060 Phypa1|32092,Phypa1|35215  
AT3G45590,AT3G45577,AT5G60230 Phypa1|26389  
AT1G47310,AT5G64510 Phypa1|26670  
AT5G06750,AT4G33920,AT3G17090,AT3G12620,AT3G55050,AT5G02760,AT5G66080,AT3G51370,AT4G38520  
Phypa1|37603,Phypa1|23919,Phypa1|24231,Phypa1|36040,Phypa1|38307  
AT1G77510,AT1G21750,AT3G62510 Phypa1|27103  
AT2G34980 Phypa1|29415  
AT5G06240 Phypa1|775  
AT2G43420,AT2G26260,AT1G47290 Phypa1|29293  
AT3G59950,AT2G44140 Phypa1|1850,Phypa1|979  
AT2G13650,AT1G07290 Phypa1|559  
AT5G37510 Phypa1|38406,Phypa1|6377,Phypa1|34330  
Phypa1|29599  
AT3G08530,AT3G11130 Phypa1|34109,Phypa1|31625,Phypa1|39739  
AT3G14050,AT1G54130 Phypa1|29327,Phypa1|29324,Phypa1|38120,Phypa1|36100  
Phypa1|22635  
Phypa1|25092  
AT3G56480,AT2G40820,AT2G26770  
Phypa1|29184,Phypa1|38885,Phypa1|29357,Phypa1|26256,Phypa1|25012  
AT3G43240 Phypa1|26354,Phypa1|15  
AT1G18210,AT1G73630,AT5G37770,AT1G66400,AT2G36180,AT5G17470,AT3G03400,AT3G03410,AT2G15680  
AT3G50360,AT4G37010 Phypa1|38970,Phypa1|14744,Phypa1|26779  
Phypa1|38646,Phypa1|36838  
AT4G03290,AT1G05990,AT3G07490,AT3G59440,AT2G43290,AT4G12860 Phypa1|2136,Phypa1|27541  
AT5G49480 Phypa1|39426,Phypa1|291  
Phypa1|15218  
AT2G41410,AT3G10190  
AT1G76650,AT1G76640,AT5G42380,AT3G01830,AT3G50770  
AT3G25600,AT1G18530  
Phypa1|20244  
Phypa1|21236,Phypa1|30701,Phypa1|37032,Phypa1|798,Phypa1|29536  
Phypa1|8857,Phypa1|3378,Phypa1|755,Phypa1|27610,Phypa1|1630,Phypa1|24571,Phypa1|26948,Phypa  
1|28038,Phypa1|37435  
AT5G17480,AT3G03430,AT1G24620  
AT5G44460,AT4G20780,AT1G21550  
AT3G59450  
Phypa1|34449  
AT3G03000,AT1G32250 Phypa1|24449,Phypa1|33116  
AT4G14640,AT3G22930  
AT3G51920  
AT5G39670,AT3G29000,AT3G47480  
AT2G41090,AT2G41100,AT1G12310,AT1G62820  
AT3G56800,AT2G27030,AT2G41110,AT3G43810,AT5G21274,AT1G66410,AT5G37780  
Phypa1|36414,Phypa1|32401,Phypa1|25190  
AT1G64650,AT3G49310,AT4G27720 Phypa1|38298,Phypa1|38204,Phypa1|36453  
AT2G23093 Phypa1|36001,Phypa1|24950  
AT1G07350,AT4G35785 Phypa1|1257,Phypa1|29276,Phypa1|1233,Phypa1|1521  
AT1G36980 Phypa1|37282,Phypa1|1224  
AT1G62250 Phypa1|27847  
AT5G47140,AT4G17570 Phypa1|35707,Phypa1|33902,Phypa1|31720  
AT4G33030 Phypa1|26479  
AT3G42830,AT5G20570 Phypa1|26039,Phypa1|39041  
AT1G12410 Phypa1|28468,Phypa1|27968  
AT1G02560 Phypa1|25142,Phypa1|29043,Phypa1|36514  
AT5G45390 Phypa1|185,Phypa1|3791  
AT1G11750Phypa1|1496,Phypa1|187

AT5G23140 Phypa1|11869  
 Phypa1|31057  
 AT1G66670 Phypa1|28634,Phypa1|1094  
 AT4G17040 Phypa1|25342,Phypa1|29099,Phypa1|37104  
 AT3G11530,AT1G32410 Phypa1|34403,Phypa1|39131  
 Phypa1|1713,Phypa1|34367,Phypa1|31627,Phypa1|13983,Phypa1|24620  
 AT3G26790  
 AT3G24650 Phypa1|1302,Phypa1|1705  
 AT1G28300 Phypa1|1708,Phypa1|29948  
 AT4G28740 Phypa1|26436  
 AT1G27980 Phypa1|27219  
 AT2G36840,AT2G39570 Phypa1|29707,Phypa1|38326,Phypa1|37842,Phypa1|25037,Phypa1|18158  
 AT5G22770,AT5G22780 Phypa1|38373,Phypa1|28608,Phypa1|39770  
 AT2G05170 Phypa1|36907  
 Phypa1|5024,Phypa1|11761,Phypa1|31059  
 AT3G53260,AT2G37040,AT5G04230,AT3G10340  
 Phypa1|26078,Phypa1|36450,Phypa1|26072,Phypa1|24625,Phypa1|39764,Phypa1|30571,Phypa1|30930,  
 Phypa1|36187,Phypa1|36538,Phypa1|36317,Phypa1|1188,Phypa1|21817,Phypa1|2769,Phypa1|3052,Phypa1|1195,P  
 hypa1|21046,Phypa1|30568,Phypa1|36169,Phypa1|25836  
 AT3G03380 Phypa1|5651,Phypa1|17422  
 AT5G37640  
 Phypa1|15293,Phypa1|38571,Phypa1|39393,Phypa1|2130  
 AT5G20620,AT5G03240,AT4G05320  
 Phypa1|29733  
 Phypa1|1662  
 Phypa1|26835  
 Phypa1|29340  
 AT3G62250,AT2G47110  
 AT1G23410  
 AT1G65350,AT4G02890  
 Phypa1|29584,Phypa1|30131  
 AT3G09790  
 Phypa1|31815,Phypa1|38632,Phypa1|36600,Phypa1|34458  
 AT5G09340  
 AT3G52590,AT2G36170 Phypa1|30111  
 AT1G11980  
 AT1G53930  
 Phypa1|2284,Phypa1|26761  
 AT1G55060  
 AT1G31340,AT2G35635 Phypa1|37186,Phypa1|37196  
 AT1G11970Phypa1|33241  
 Phypa1|25674  
 AT4G05050  
 Phypa1|31963,Phypa1|11073,Phypa1|38289,Phypa1|38002  
 AT1G53980,AT1G53950  
 Phypa1|27477  
 AT4G03120 Phypa1|18260,Phypa1|34182  
 AT3G02690 Phypa1|29852  
 Phypa1|21346,Phypa1|20527,Phypa1|20633  
 Phypa1|27393  
 AT5G53700,AT5G03480,AT3G09160,AT5G05430,AT5G03500,AT5G03220 Phypa1|279  
 AT3G15920,AT2G25350,AT4G32160 Phypa1|34876,Phypa1|33931  
 AT2G26670,AT1G69720,AT1G58300 Phypa1|39190,Phypa1|36496  
 AT2G26550 Phypa1|24720,Phypa1|688  
 Phypa1|23313  
 Phypa1|9506  
 AT4G38600 Phypa1|29543,Phypa1|37118  
 AT5G02880  
 AT2G39260 Phypa1|16480,Phypa1|27885  
 AT5G12200 Phypa1|30906,Phypa1|27509  
 AT3G10820,AT5G05140 Phypa1|35384  
 AT1G19600 Phypa1|25494,Phypa1|25695  
 AT3G27100 Phypa1|36756,Phypa1|36350,Phypa1|28450  
 AT5G04360 Phypa1|34055  
 AT1G71230,AT1G22920 Phypa1|35938,Phypa1|37535  
 AT4G19860,AT3G03310 Phypa1|27163,Phypa1|30078,Phypa1|29236  
 Phypa1|21591  
 AT2G35360 Phypa1|5619  
 Phypa1|1146,Phypa1|317,Phypa1|1698,Phypa1|858,Phypa1|333,Phypa1|787,Phypa1|1268,Phypa1|344,P  
 hypa1|349  
 Phypa1|795,Phypa1|35477,Phypa1|332  
 AT2G24400,AT4G31320  
 AT5G20810,AT3G43120 Phypa1|1718,Phypa1|2209,Phypa1|1717,Phypa1|1715,Phypa1|1720,Phypa1|846  
 AT3G53250,AT2G37030,AT5G03310,AT1G19840,AT1G75590,AT5G10990,AT4G34750,AT3G09870,AT2G28085,AT3  
 G03850,AT3G03830,AT3G03840,AT3G03820,AT5G18020,AT5G18080,AT5G18010,AT5G18030,AT5G18050,AT5G18  
 060,AT2G21200,AT3G03847,AT4G13790,AT4G38850,AT2G21210,AT4G38840,AT4G34790,AT4G34810,AT4G34800,  
 AT4G34770,AT4G34780,AT1G19830,AT1G75580,AT2G21220,AT4G38860,AT2G16580,AT4G34760,AT4G36110,AT2  
 G18010,AT3G51200,AT5G66260,AT3G20220,AT4G09530,AT2G45210,AT3G60690,AT4G12410,AT4G22620,AT2G46  
 690,AT4G00880,AT3G61900,AT5G53590,AT5G50760,AT2G36210,AT1G56150,AT3G12830,AT1G79130,AT1G16510  
 AT3G17940,AT3G47800,AT3G01260,AT5G15140 Phypa1|39121  
 AT1G08110Phypa1|3059,Phypa1|23914,Phypa1|6365  
 AT1G76350,AT1G20640,AT2G17150,AT4G35270,AT4G38340

Phypa1|38376,Phypa1|37191,Phypa1|1357,Phypa1|39448,Phypa1|38231,Phypa1|24931,Phypa1|415  
AT3G59580,AT2G43500 Phypa1|17798  
AT4G24020,AT1G64530  
AT5G14070,AT3G02000,AT4G15660,AT4G15670,AT4G15690,AT4G15680,AT4G15700,AT5G18600,AT1G03020,AT3  
G62930,AT2G47870,AT3G62950,AT2G47880,AT3G62960,AT1G06830,AT2G30540  
Phypa1|26601,Phypa1|27925  
AT2G20270,AT4G28730 Phypa1|30055  
AT5G40370,AT5G63030 Phypa1|1672  
AT1G03850,AT1G28480  
Phypa1|13629,Phypa1|2211  
AT4G33040,AT5G11930  
AT2G25280 Phypa1|2632,Phypa1|25600  
AT5G54090 Phypa1|34774  
Phypa1|31293,Phypa1|22783,Phypa1|22761  
AT1G65070 Phypa1|36989  
AT2G01770 Phypa1|26930  
Phypa1|28534  
AT2G30070  
AT5G09400,AT4G33530,AT1G60160  
AT2G40540,AT1G70300,AT5G14880  
AT2G35060,AT1G31120,AT4G19960 Phypa1|28218,Phypa1|39013,Phypa1|23888  
AT4G23640,AT3G02050  
Phypa1|38877,Phypa1|2923,Phypa1|2571,Phypa1|28523,Phypa1|37748,Phypa1|2551,Phypa1|5094,Phyp  
a1|30889,Phypa1|6885,Phypa1|29440  
Phypa1|37239  
AT4G13420 Phypa1|10152,Phypa1|23672,Phypa1|25554  
AT1G71310,AT5G47870 Phypa1|29417,Phypa1|29772  
AT5G36700,AT5G36790,AT5G47760 Phypa1|35970,Phypa1|36336,Phypa1|15294  
AT3G48430,AT5G04240 Phypa1|32671,Phypa1|34029  
AT3G16690,AT4G15920,AT4G25010,AT5G50800,AT3G48740,AT5G23660,AT5G50790,AT5G13170,AT2G39060,AT3  
G14770,AT1G21460,AT5G53190 Phypa1|29329,Phypa1|29882,Phypa1|32945,Phypa1|27953,Phypa1|25944  
AT4G10850,AT1G66770,AT5G62850,AT3G28007,AT5G40260 Phypa1|29381  
AT1G32900 Phypa1|6187,Phypa1|25691  
AT5G24300 Phypa1|38088,Phypa1|38089  
AT3G01180Phypa1|38232,Phypa1|39407,Phypa1|36243  
AT3G11950Phypa1|36711  
AT5G19820 Phypa1|34677,Phypa1|38432  
AT4G27640 Phypa1|39129  
Phypa1|371,Phypa1|374  
AT2G16485  
AT2G16470  
AT2G16480 Phypa1|29332  
AT5G23480,AT2G18090  
AT5G08430,AT5G63700  
Phypa1|375  
AT3G51120  
AT1G79880,AT4G32720 Phypa1|39219  
AT5G64370 Phypa1|30916,Phypa1|38894  
AT2G28020,AT2G28230,AT4G09070 Phypa1|37252  
AT3G02080,AT5G15520,AT5G61170  
Phypa1|36995,Phypa1|24175,Phypa1|38460,Phypa1|38337,Phypa1|32962  
AT5G45380 Phypa1|20826,Phypa1|39464  
AT1G23190,AT1G70730 Phypa1|35950,Phypa1|37434  
AT5G51820 Phypa1|23923,Phypa1|23991  
AT5G42910,AT2G36270,AT1G45249,AT1G49720,AT3G19290,AT4G34000 Phypa1|1695  
AT3G19190 Phypa1|28418  
AT1G68100 Phypa1|20253  
AT2G21170Phypa1|36385,Phypa1|26560,Phypa1|38162,Phypa1|2782,Phypa1|29969  
Phypa1|11825  
Phypa1|16151,Phypa1|8726,Phypa1|30807  
AT3G55440 Phypa1|24489  
AT4G33625 Phypa1|716,Phypa1|726,Phypa1|2087  
AT1G56590 Phypa1|37203  
AT4G24160 Phypa1|23206,Phypa1|21645,Phypa1|27273  
AT5G38840 Phypa1|32523  
AT1G52250,AT3G16120,AT4G27360,AT1G23220,AT5G20110 Phypa1|26321,Phypa1|35967,Phypa1|26556  
AT1G48520 Phypa1|35400,Phypa1|39623,Phypa1|5433,Phypa1|30464  
AT5G18100  
Phypa1|2465,Phypa1|13435  
AT2G28190  
AT1G08830 Phypa1|23794,Phypa1|36138  
Phypa1|31357  
Phypa1|7095,Phypa1|37150,Phypa1|32321,Phypa1|2953,Phypa1|29808,Phypa1|36099  
Phypa1|24557,Phypa1|2659,Phypa1|36054,Phypa1|35520  
AT2G38290  
AT4G33380 Phypa1|32950,Phypa1|35511  
Phypa1|34592,Phypa1|33852  
Phypa1|31811,Phypa1|34351  
AT3G48240,AT5G63130,AT3G26510,AT1G70640,AT5G49920,AT1G25300,AT2G01190,AT3G18230,AT5G09620,AT5  
G64430,AT4G05150,AT3G24715 Phypa1|26687,Phypa1|28019  
AT5G08630 Phypa1|36184,Phypa1|2982  
AT2G07771,AT2G07681 Phypa1|29401

AT5G03905           Phypa1|27690,Phypa1|30412  
 AT1G10500           Phypa1|28743,Phypa1|25296,Phypa1|25736  
 AT2G46225           Phypa1|30281  
 AT5G47860           Phypa1|35689  
 AT5G01330,AT5G01320,AT4G33070,AT5G54960  
                   Phypa1|25419,Phypa1|36642,Phypa1|28478,Phypa1|3018,Phypa1|28596  
                   Phypa1|32390  
 AT5G44500,AT4G20440           Phypa1|39602  
                   Phypa1|2353  
                   Phypa1|2354  
 AT4G34720,AT2G16510,AT4G38920,AT1G19910,AT1G75630  
                   Phypa1|24387,Phypa1|36466,Phypa1|36465,Phypa1|39311,Phypa1|2410  
 AT4G34450,AT2G16200           Phypa1|35165,Phypa1|25079,Phypa1|32644,Phypa1|32936  
 AT5G17660           Phypa1|17347,Phypa1|2552  
 AT2G34960,AT1G17120  
                   Phypa1|31200  
 AT1G05940           Phypa1|30278  
 AT3G10600,AT5G04770           Phypa1|36825,Phypa1|25343  
 AT1G58030,AT5G36940,AT3G03720           Phypa1|37705  
 AT4G21120Phypa1|36009,Phypa1|32844  
                   Phypa1|23193,Phypa1|31343,Phypa1|20573,Phypa1|30424,Phypa1|31012,Phypa1|21738,Phypa1|5122  
 AT3G09030,AT5G41330           Phypa1|23687  
 AT3G06200           Phypa1|24432  
                   Phypa1|4907  
 AT2G29190,AT2G29200,AT2G29140  
 AT3G10360  
 AT1G78160,AT1G22240,AT1G35750,AT1G35730,AT4G08840  
 AT4G25880,AT3G20250  
                   Phypa1|12808  
 AT5G56510           Phypa1|436,Phypa1|25048  
 AT5G43110,AT5G43090,AT4G08560  
                   Phypa1|27368,Phypa1|27376,Phypa1|38895,Phypa1|38485,Phypa1|25794  
 AT3G24090           Phypa1|2996,Phypa1|39112  
                   Phypa1|30493  
 AT3G10350,AT5G60730           Phypa1|26810,Phypa1|37895  
 AT5G12390,AT3G57090           Phypa1|1192,Phypa1|33276  
 AT4G24610,AT5G65440,AT5G48310           Phypa1|5003,Phypa1|38755,Phypa1|24689  
 AT5G18760,AT3G06330  
                   Phypa1|27165,Phypa1|1149  
 AT5G60580,AT3G09760,AT5G03180           Phypa1|1161  
 AT1G64385           Phypa1|35471,Phypa1|9071  
 AT3G56040           Phypa1|36764  
 AT2G23890           Phypa1|30659  
 AT3G42630           Phypa1|29750  
                   Phypa1|37896  
 AT5G09420,AT3G17970,AT1G08980           Phypa1|27482,Phypa1|28554,Phypa1|28819  
 AT3G28730           Phypa1|934  
                   Phypa1|25756  
 AT5G59140           Phypa1|36734,Phypa1|30637  
 AT1G09770           Phypa1|39790  
                   Phypa1|7272,Phypa1|26562,Phypa1|2596  
                   Phypa1|1682  
                   Phypa1|31152  
                   Phypa1|2572  
                   Phypa1|5539  
                   Phypa1|25969  
                   Phypa1|25417  
 AT1G02050,AT4G00040,AT4G34850           Phypa1|29862  
                   Phypa1|29261,Phypa1|29259  
                   Phypa1|24107,Phypa1|23722,Phypa1|29781,Phypa1|29845,Phypa1|29846,Phypa1|20139,Phypa1|30293,  
 Phypa1|2478,Phypa1|25964,Phypa1|21451,Phypa1|21452,Phypa1|24289,Phypa1|30798,Phypa1|37708,Phypa1|5121  
 ,Phypa1|21058,Phypa1|38144,Phypa1|2484,Phypa1|26936,Phypa1|5532,Phypa1|29230  
 AT5G13930  
 AT4G12830           Phypa1|23667,Phypa1|24317  
                   Phypa1|689  
 AT2G36020  
 AT5G42560,AT1G75700,AT1G19950  
                   Phypa1|663,Phypa1|266,Phypa1|1191,Phypa1|763,Phypa1|29478,Phypa1|765  
 AT2G33435  
                   Phypa1|26480,Phypa1|27011,Phypa1|1380,Phypa1|37819,Phypa1|27426  
 AT1G60830,AT1G60900,AT4G36690  
 AT2G33440           Phypa1|27928  
 AT3G14980,AT5G36670,AT5G36740,AT1G05380,AT4G14920,AT5G58610,AT5G63900           Phypa1|33079  
 AT3G52960  
 AT1G60740,AT1G65970,AT1G65980           Phypa1|36444  
                   Phypa1|29906  
                   Phypa1|706,Phypa1|38163,Phypa1|3181  
 AT3G06050           Phypa1|36299  
 AT2G45770           Phypa1|27414  
                   Phypa1|31341  
 AT5G03940           Phypa1|38198  
                   Phypa1|29896

Phypa1|25972  
 AT3G12500,AT1G02360,AT4G01700  
 AT3G16920,AT1G05850 Phypa1|29870,Phypa1|28071,Phypa1|2997  
 Phypa1|1287,Phypa1|31217  
 Phypa1|25107,Phypa1|28881,Phypa1|2541,Phypa1|29891,Phypa1|28084,Phypa1|39239  
 AT2G43590,AT3G47540,AT2G43580,AT3G54420,AT2G43570,AT2G43620,AT2G43610,AT2G43600,AT1G56680  
 Phypa1|8751,Phypa1|1104,Phypa1|39260  
 AT5G09270 Phypa1|24757  
 AT3G54360 Phypa1|24996  
 AT5G09230 Phypa1|25112  
 AT2G21530 Phypa1|32065,Phypa1|32318  
 AT4G26550,AT5G56020 Phypa1|31716,Phypa1|221  
 AT1G58200 Phypa1|960  
 AT5G10490 Phypa1|473,Phypa1|27005,Phypa1|25530  
 AT1G35660 Phypa1|39539  
 AT5G06370,AT4G00905,AT1G01225,AT5G16360,AT5G16330,AT3G02700 Phypa1|36485  
 AT5G41010,AT1G53690 Phypa1|2481  
 AT4G03130,AT3G21480 Phypa1|34891,Phypa1|33640  
 AT3G52980,AT2G05160 Phypa1|25613,Phypa1|28103  
 Phypa1|9742  
 AT4G32700 Phypa1|30698,Phypa1|9080  
 AT4G32695 Phypa1|17547  
 AT2G22400,AT4G40000 Phypa1|21307,Phypa1|463  
 AT5G07320,AT5G61810,AT5G51050 Phypa1|38980,Phypa1|29104,Phypa1|27884  
 Phypa1|7889  
 AT3G48630,AT3G44150,AT3G11800 Phypa1|36574  
 Phypa1|873  
 AT2G15910  
 AT5G08450 Phypa1|35709,Phypa1|34597,Phypa1|32992  
 AT3G10060 Phypa1|1136  
 AT2G26230 Phypa1|29000  
 AT4G06676 Phypa1|27560  
 AT1G55810,AT4G26510  
 AT3G27440 Phypa1|31476,Phypa1|21910  
 AT3G27190,AT5G40870 Phypa1|38043,Phypa1|27087,Phypa1|35850,Phypa1|32014  
 AT1G55300 Phypa1|715,Phypa1|25713  
 AT1G56090 Phypa1|29731,Phypa1|26790,Phypa1|37566  
 AT1G29320 Phypa1|32551  
 AT2G34640 Phypa1|20311,Phypa1|13881  
 AT1G31600 Phypa1|565  
 AT5G65250 Phypa1|32378  
 AT3G06170,AT1G16180 Phypa1|26976  
 AT3G49180 Phypa1|5493,Phypa1|25209  
 AT5G23290 Phypa1|29422  
 AT1G80040,AT5G32440,AT5G02510 Phypa1|37439,Phypa1|39762,Phypa1|36034  
 AT4G31770 Phypa1|27506  
 AT3G06680,AT3G06700 Phypa1|38405,Phypa1|24160,Phypa1|23863  
 AT3G10860,AT5G05370 Phypa1|39310,Phypa1|2418,Phypa1|23780,Phypa1|26328  
 AT5G64350 Phypa1|36176  
 AT3G25220,AT5G48580 Phypa1|17045,Phypa1|2189,Phypa1|30370  
 AT1G58450,AT4G39710  
 Phypa1|28230  
 AT5G45680  
 AT3G25230,AT5G48570 Phypa1|27640  
 Phypa1|30216  
 Phypa1|26387,Phypa1|26360  
 Phypa1|38854  
 AT1G11390,AT1G61640  
 AT3G60360 Phypa1|710  
 AT1G63855 Phypa1|24372  
 AT5G10800,AT5G25060 Phypa1|37553,Phypa1|28133  
 AT3G49990 Phypa1|35321  
 AT1G06950 Phypa1|36226,Phypa1|39773  
 AT5G51660 Phypa1|3628,Phypa1|2667  
 AT3G46780 Phypa1|29247  
 AT1G03150 Phypa1|24060  
 AT1G04010 Phypa1|37960  
 AT1G54190,AT5G20540,AT1G31880,AT2G21030,AT2G35600,AT1G54180,AT3G14000  
 Phypa1|28939,Phypa1|32520  
 AT2G27290 Phypa1|25764  
 AT3G19820 Phypa1|13750,Phypa1|37205  
 AT4G16780,AT5G47370,AT4G17460,AT3G60390,AT2G44910  
 Phypa1|25612,Phypa1|6641,Phypa1|7735,Phypa1|26064  
 Phypa1|26347,Phypa1|26011,Phypa1|28940,Phypa1|30778  
 AT5G06710  
 AT2G22800,AT4G37790  
 AT1G70920,AT2G01430  
 AT5G27390 Phypa1|35149  
 AT4G33680 Phypa1|25876  
 AT2G13810 Phypa1|31165,Phypa1|31445  
 AT5G66150,AT5G13980,AT3G26720 Phypa1|27990,Phypa1|36820  
 AT1G48360 Phypa1|26851



AT1G69740,AT1G44318  
Phypa1|35800,Phypa1|39373  
Phypa1|3073  
Phypa1|37794  
AT3G53210,AT3G18200,AT1G75500 Phypa1|29797,Phypa1|25991,Phypa1|36312,Phypa1|1938  
Phypa1|37860  
AT4G19185,AT5G45370,AT3G45870 Phypa1|38883,Phypa1|39551  
AT5G40240,AT5G40230,AT4G15540,AT3G28050,AT3G28070,AT3G28100,AT3G28080,AT3G28130,AT5G40210,AT3  
G28060,AT1G60050,AT1G70260,AT1G11460,AT1G11450,AT1G01070,AT4G01430,AT4G01450,AT4G01440,AT3G30  
340,AT1G21890,AT4G08300,AT1G44800,AT4G08290,AT2G39510,AT2G37450,AT2G37460,AT5G07050,AT3G56620,  
AT2G40900,AT5G13670,AT4G24980,AT1G68170,AT1G25270,AT1G09380,AT5G64700,AT1G43650,AT4G30420,AT4  
G28040,AT5G47470,AT4G16620  
AT2G24270 Phypa1|24838,Phypa1|26102,Phypa1|2546,Phypa1|8100,Phypa1|2701  
AT4G28005,AT5G52840 Phypa1|29301  
AT5G13690 Phypa1|39597  
Phypa1|27148  
Phypa1|11521,Phypa1|35846  
AT1G12250  
AT4G00550,AT3G11670 Phypa1|28117,Phypa1|39039,Phypa1|32841,Phypa1|39166  
AT3G02560,AT5G16130,AT1G48830 Phypa1|37237,Phypa1|14357,Phypa1|38592,Phypa1|35569  
Phypa1|7500  
AT5G53770 Phypa1|33695  
AT1G15740 Phypa1|2985,Phypa1|38476  
AT5G35180 Phypa1|27308,Phypa1|28184,Phypa1|30341,Phypa1|37844  
Phypa1|634,Phypa1|638  
AT1G06050  
AT3G54800,AT2G28320 Phypa1|26692,Phypa1|23782,Phypa1|25177,Phypa1|30200,Phypa1|27362  
AT4G19040,AT5G45560 Phypa1|35724,Phypa1|17889  
Phypa1|27152,Phypa1|35742,Phypa1|33677  
AT5G25020,AT5G24990,AT5G25010,AT5G10750  
AT1G32730 Phypa1|33498  
AT5G65750,AT3G55410 Phypa1|37821,Phypa1|31852,Phypa1|4353,Phypa1|36023  
AT3G19895 Phypa1|25974,Phypa1|25312  
Phypa1|34062,Phypa1|33851  
Phypa1|20798  
AT5G05230,AT2G40640  
AT4G26300,AT1G66530 Phypa1|23502,Phypa1|31149,Phypa1|21332,Phypa1|25953  
AT1G06240 Phypa1|28719  
AT4G20360 Phypa1|28275,Phypa1|37330  
AT4G02930 Phypa1|971,Phypa1|28814,Phypa1|984  
AT5G14460 Phypa1|34287  
Phypa1|23317  
AT5G13800 Phypa1|26263  
Phypa1|21981,Phypa1|21982,Phypa1|30097  
AT4G04770,AT5G44316  
Phypa1|25894,Phypa1|24326  
AT2G44520 Phypa1|1887  
AT2G30570 Phypa1|26811,Phypa1|26824,Phypa1|386,Phypa1|23977  
AT3G10220 Phypa1|28195  
AT5G28840 Phypa1|34928,Phypa1|34337,Phypa1|36996  
AT1G20840,AT4G35300,AT3G51490 Phypa1|30562,Phypa1|4615,Phypa1|914,Phypa1|28426  
AT1G80920  
Phypa1|27657,Phypa1|34228,Phypa1|29220,Phypa1|32481,Phypa1|30245,Phypa1|37085,Phypa1|5158,P  
hupa1|11792,Phypa1|31961,Phypa1|33684  
AT1G72070 Phypa1|5159  
AT1G30660 Phypa1|17375  
AT1G30680 Phypa1|37373  
Phypa1|5555  
AT1G56420,AT1G12530 Phypa1|747  
AT1G01220 Phypa1|35167  
AT5G53330 Phypa1|39115  
AT1G19485 Phypa1|17428,Phypa1|35668  
AT1G73390,AT1G17940,AT5G14020  
Phypa1|7625,Phypa1|515,Phypa1|36098,Phypa1|26297,Phypa1|26997,Phypa1|30163  
AT5G23590 Phypa1|1097  
AT1G78800 Phypa1|39440  
AT3G27340 Phypa1|26569  
AT3G10630 Phypa1|25031  
Phypa1|28530,Phypa1|29467  
Phypa1|16313  
AT2G01170Phypa1|36493  
AT3G09580 Phypa1|35460  
AT1G79830 Phypa1|24967,Phypa1|34988  
AT1G70070 Phypa1|39317,Phypa1|16283,Phypa1|28726,Phypa1|9846  
AT2G04560 Phypa1|26273,Phypa1|1854,Phypa1|33662  
AT5G66470 Phypa1|30521  
Phypa1|23530  
Phypa1|24891,Phypa1|27836,Phypa1|27195  
Phypa1|31142  
Phypa1|23028,Phypa1|21651  
AT1G62640  
AT3G06820,AT1G80210 Phypa1|32938,Phypa1|36565,Phypa1|19545

AT4G29230,AT1G28470,AT4G28500,AT5G56620,AT1G25580,AT3G01600,AT5G14490 Phypa1|1987  
     Phypa1|18228  
     Phypa1|1730  
 AT2G45030,AT1G45332 Phypa1|38319,Phypa1|27466  
     Phypa1|22164  
     Phypa1|20548  
     Phypa1|22968  
     Phypa1|31380  
     Phypa1|1744  
 AT1G62750 Phypa1|3022  
 AT1G55820,AT3G13222,AT3G07660 Phypa1|11064,Phypa1|34605  
     Phypa1|32761,Phypa1|31520  
 AT5G47720,AT5G48230 Phypa1|39192  
 AT2G46820,AT1G52220 Phypa1|23813,Phypa1|24130,Phypa1|33661  
 AT2G19750,AT5G56670,AT4G29390 Phypa1|37858,Phypa1|38902,Phypa1|36197,Phypa1|25335  
     Phypa1|39460  
 AT5G08020,AT5G61000  
 AT2G06510 Phypa1|29151,Phypa1|438  
 AT5G45400,AT4G19130  
 AT5G10680,AT5G10720 Phypa1|37449,Phypa1|35986,Phypa1|31493,Phypa1|36387,Phypa1|32434  
 AT2G19910,AT2G19920,AT2G19930 Phypa1|35638,Phypa1|34773  
 AT5G24930,AT2G24790,AT5G57660,AT3G02380,AT5G15840,AT5G15850  
     Phypa1|39652,Phypa1|36979,Phypa1|39643  
 AT1G23020,AT1G01590,AT1G01580,AT5G23990,AT5G23980,AT5G50160  
     Phypa1|12079,Phypa1|32958,Phypa1|33560,Phypa1|25040  
 AT5G49740,AT5G49730 Phypa1|39793,Phypa1|25954  
 AT2G35490 Phypa1|26122  
 AT4G04020,AT4G22240 Phypa1|25394,Phypa1|27100  
 AT2G03690 Phypa1|29194  
 AT3G06810 Phypa1|29650,Phypa1|25701  
 AT1G54140 Phypa1|2367  
 AT3G53860,AT2G31600,AT1G05860 Phypa1|35825  
 AT3G30775,AT5G38710 Phypa1|38681,Phypa1|29359,Phypa1|25465  
     Phypa1|39063  
 AT1G70330 Phypa1|36316,Phypa1|36410  
 AT4G05110,AT4G05120,AT4G05130,AT4G05140,AT1G61630,AT3G09990 Phypa1|24725  
 AT3G18940 Phypa1|27924  
 AT5G01015,AT1G65295 Phypa1|24366,Phypa1|38068,Phypa1|24418,Phypa1|857,Phypa1|1285  
 AT2G47590 Phypa1|29466,Phypa1|500  
 AT3G26680 Phypa1|39663  
 AT2G45700 Phypa1|27846  
 AT1G29250,AT2G34160,AT3G04620 Phypa1|27624,Phypa1|38957,Phypa1|27637  
 AT2G31370,AT1G06070,AT2G12940,AT2G13150,AT2G12900,AT2G21235,AT2G24340,AT4G38900,AT2G21230,AT2  
 G40620,AT1G06850,AT1G43700  
     Phypa1|1934,Phypa1|38148,Phypa1|3745,Phypa1|25253,Phypa1|36162,Phypa1|26814  
 AT4G23660 Phypa1|38905  
     Phypa1|31319  
 AT5G28640 Phypa1|3375,Phypa1|33775,Phypa1|34212,Phypa1|32815  
 AT1G63850,AT3G50780,AT2G13690,AT5G60050 Phypa1|1833,Phypa1|2255  
 AT3G59900,AT2G44080,AT2G41230 Phypa1|34764  
 AT1G64220,AT5G41685 Phypa1|38461,Phypa1|36699  
 AT2G33220,AT1G04630 Phypa1|24028,Phypa1|32657  
 AT3G13410 Phypa1|33398,Phypa1|32061  
 AT5G12410 Phypa1|3246  
 AT1G03650 Phypa1|25306  
 AT2G40030  
 AT1G63020 Phypa1|33477,Phypa1|10765,Phypa1|16502  
     Phypa1|2290  
 AT1G63900,AT1G59560 Phypa1|39234,Phypa1|36046  
 AT1G48320,AT5G48950 Phypa1|322  
     Phypa1|2341,Phypa1|33169  
 AT1G08450,AT1G09210,AT1G56340 Phypa1|2595,Phypa1|33193  
 AT2G21890,AT2G21730,AT4G39330,AT4G37990,AT4G37980,AT4G37970  
 AT1G72680 Phypa1|33499  
 AT3G19450,AT4G34230 Phypa1|14872,Phypa1|27937  
 AT4G26770,AT4G22340,AT1G62430 Phypa1|38945  
 AT4G39840 Phypa1|34727,Phypa1|35687,Phypa1|9349  
 AT4G34640,AT4G34650 Phypa1|28461,Phypa1|2918,Phypa1|32121  
 AT1G76060 Phypa1|36743  
 AT5G64650,AT5G09770 Phypa1|31352,Phypa1|28834  
     Phypa1|29322  
 AT2G20830 Phypa1|2983  
 AT5G25754,AT5G25757 Phypa1|39646,Phypa1|39365  
 AT4G11120 Phypa1|26468,Phypa1|37181,Phypa1|37779,Phypa1|31138  
 AT1G49870 Phypa1|6890  
 AT5G43330,AT1G04410,AT5G56720 Phypa1|37720  
 AT3G20430 Phypa1|34983  
 AT4G28270,AT4G03510,AT4G27470,AT1G74990,AT2G23780,AT1G19310 Phypa1|28519  
 AT4G25290 Phypa1|1773,Phypa1|29975  
 AT4G29660 Phypa1|29157  
 AT2G25320,AT2G25330 Phypa1|37137  
 AT3G12010 Phypa1|39011

AT2G45690 Phypa1|24804  
AT1G72550 Phypa1|25262,Phypa1|36767  
AT5G57700 Phypa1|36973  
AT3G51010 Phypa1|31758  
AT3G22220,AT1G79740,AT3G13030,AT3G13020,AT3G13010,AT3G17450,AT4G15020,AT5G31412,AT5G33406,AT1  
G36095,AT1G43260 Phypa1|2091  
AT4G23840 Phypa1|37746  
AT3G59380 Phypa1|37731  
AT3G51430,AT3G51440,AT3G51450,AT3G51420 Phypa1|25354,Phypa1|27585,Phypa1|2281,Phypa1|38848  
Phypa1|1948  
AT3G57790 Phypa1|495,Phypa1|38058  
AT5G02790,AT5G02780,AT3G55040 Phypa1|2050  
AT1G16860,AT1G78880 Phypa1|1844,Phypa1|36065  
Phypa1|31460,Phypa1|31335  
AT5G18570 Phypa1|24454  
AT1G07620 Phypa1|504  
Phypa1|33945  
AT5G06550 Phypa1|7846,Phypa1|28395  
AT5G35520 Phypa1|6530  
Phypa1|19928  
AT1G50380 Phypa1|24069  
AT5G66960  
AT1G69020 Phypa1|24280  
AT2G32970 Phypa1|33570,Phypa1|27573  
AT2G19640 Phypa1|132  
Phypa1|20608  
AT1G01790,AT4G00630 Phypa1|29528,Phypa1|24380,Phypa1|25624  
AT4G04850 Phypa1|414,Phypa1|906  
AT4G00640  
AT3G47450 Phypa1|930  
Phypa1|531  
AT1G78560  
Phypa1|24509  
AT2G26900 Phypa1|28765  
AT3G48195 Phypa1|37339  
AT4G19180 Phypa1|2248,Phypa1|1383,Phypa1|30531,Phypa1|1785  
AT5G63010 Phypa1|26971  
AT4G12590 Phypa1|28006,Phypa1|37280  
AT4G12980,AT3G25290,AT5G48750,AT3G59070,AT4G17280,AT5G47530,AT5G35735,AT3G07390  
Phypa1|26455,Phypa1|29905,Phypa1|35618,Phypa1|37867,Phypa1|34522  
AT2G04850  
AT3G07570,AT3G61750 Phypa1|30627,Phypa1|35324,Phypa1|34066,Phypa1|1926  
AT5G47090 Phypa1|29355  
AT1G49820 Phypa1|25011  
AT4G10650,AT2G41670 Phypa1|36731  
AT3G62240,AT2G47090 Phypa1|36170  
AT3G06580 Phypa1|36917,Phypa1|32041  
AT5G10860 Phypa1|2425,Phypa1|38351,Phypa1|26454  
AT5G25480 Phypa1|27973  
AT1G78690 Phypa1|37365  
AT4G14180 Phypa1|12009  
Phypa1|7775  
AT2G48100,AT3G27970,AT5G40310 Phypa1|27246  
AT3G15080 Phypa1|28906  
AT4G27700 Phypa1|26830,Phypa1|717  
Phypa1|28013  
Phypa1|21385  
AT3G28460  
AT3G04080,AT5G18280 Phypa1|38153,Phypa1|36024,Phypa1|26014  
AT1G21860,AT1G21850,AT1G76160,AT1G41830,AT4G22010,AT4G38420,AT4G28090,AT3G13390,AT1G55570,AT3  
G13400,AT1G55560,AT5G66920,AT4G37160,AT2G23630 Phypa1|29096  
AT1G75790  
AT5G51480,AT4G25240,AT4G12420,AT5G48450 Phypa1|28114  
AT3G49320,AT5G41970 Phypa1|36347,Phypa1|26743  
AT1G13690 Phypa1|5269,Phypa1|2522  
AT4G37100,AT2G23520,AT5G66950,AT5G51920,AT4G22980  
Phypa1|29806,Phypa1|24718,Phypa1|30663,Phypa1|35957  
AT1G73800,AT1G73805,AT5G26920,AT5G62570,AT4G25800,AT5G57580,AT2G18750,AT2G24300,AT4G31000  
Phypa1|27421,Phypa1|1775,Phypa1|36535,Phypa1|37978,Phypa1|1781,Phypa1|27139  
AT5G58720,AT3G15390 Phypa1|33736  
AT4G38460 Phypa1|31370  
AT3G29420  
Phypa1|38170,Phypa1|15039  
AT2G23800,AT2G18640,AT1G49530,AT3G20160,AT3G29430,AT3G32040,AT3G14530,AT3G14550,AT3G14510,AT2  
G18620,AT4G36810  
AT2G24590,AT4G31580,AT1G23860 Phypa1|28992,Phypa1|30123  
AT2G18340,AT4G36600  
AT3G53040 Phypa1|1103  
AT4G21020,AT5G44310  
Phypa1|35263  
AT2G42560  
AT3G17520

AT3G15280 Phypa1|30375,Phypa1|34183  
Phypa1|2351  
Phypa1|195  
Phypa1|38772  
AT5G51840 Phypa1|37297  
AT5G41390,AT1G63830,AT4G23470 Phypa1|36252  
Phypa1|31540  
Phypa1|35038  
AT3G05900,AT1G76780,AT5G40450,AT2G12875  
AT4G37820,AT2G22795,AT4G33740  
Phypa1|35287  
AT4G21590,AT4G21600,AT4G21585,AT1G68290,AT1G11190 Phypa1|30747,Phypa1|167  
AT1G65280 Phypa1|8733,Phypa1|33415  
AT5G65180,AT5G10060,AT3G26990 Phypa1|32500,Phypa1|34399  
AT1G16970 Phypa1|2989  
AT1G62280 Phypa1|29002  
AT1G12480 Phypa1|1835,Phypa1|968  
AT5G24030,AT4G27970  
Phypa1|1794  
AT3G27930 Phypa1|26261  
AT5G01990 Phypa1|2734,Phypa1|39765,Phypa1|20997  
Phypa1|27186  
AT1G71090 Phypa1|29188,Phypa1|2900  
AT2G36230 Phypa1|27818  
AT5G28060,AT3G04920 Phypa1|30717,Phypa1|28950,Phypa1|30718,Phypa1|24991,Phypa1|32531  
AT4G13220 Phypa1|19809,Phypa1|34752  
AT5G13340 Phypa1|24012,Phypa1|35246  
AT4G18040 Phypa1|39713,Phypa1|32589,Phypa1|36468,Phypa1|2625  
AT5G35620  
AT1G29590,AT1G29550  
Phypa1|12585  
AT5G18110Phypa1|24655  
AT4G30820 Phypa1|3576  
AT1G48650,AT2G01130,AT5G04895 Phypa1|37903  
AT1G06670,AT2G30800 Phypa1|36664  
Phypa1|33201  
AT2G35920  
AT1G58050,AT1G58060 Phypa1|30258  
Phypa1|36029  
AT3G21870,AT2G44740,AT5G07450,AT5G61650,AT3G63120,AT3G05327,AT3G60550,AT2G45080  
Phypa1|729,Phypa1|240,Phypa1|2088,Phypa1|1156,Phypa1|247  
AT5G01470 Phypa1|38718  
AT1G69900,AT1G27100,AT1G69890,AT1G59710,AT3G28630,AT3G01311  
Phypa1|36900,Phypa1|27837,Phypa1|24866  
AT4G36800  
AT3G24515 Phypa1|37949  
AT5G62540  
AT2G32790  
AT2G46030  
AT3G08700  
AT4G27960 Phypa1|39777  
AT3G57870 Phypa1|24184,Phypa1|37628  
AT3G55380,AT3G46460 Phypa1|24206,Phypa1|34336,Phypa1|35987,Phypa1|36807  
Phypa1|24207  
AT3G20060,AT1G50490  
AT3G08690  
AT5G41700  
AT5G50870 Phypa1|23718  
AT5G53300  
AT1G36340  
AT1G64230  
AT2G02760,AT1G14400 Phypa1|16906,Phypa1|38874,Phypa1|36940  
AT3G13550 Phypa1|29580,Phypa1|29012  
AT2G18600 Phypa1|4045,Phypa1|38926,Phypa1|36542,Phypa1|2103,Phypa1|36660  
AT1G78870,AT1G16890 Phypa1|23838,Phypa1|34935  
AT5G25760 Phypa1|34230  
Phypa1|36739,Phypa1|36742,Phypa1|33199,Phypa1|23769  
AT5G59300  
AT5G05080 Phypa1|25572  
AT5G56150  
AT5G41340,AT1G63800 Phypa1|23958,Phypa1|32537  
AT2G16740  
AT5G05920 Phypa1|29412,Phypa1|27131  
Phypa1|38181  
AT1G57770 Phypa1|32474  
AT3G12210 Phypa1|37752  
AT4G01690 Phypa1|21648,Phypa1|36260  
AT5G15330,AT5G20150,AT2G26660,AT2G45130  
Phypa1|25205,Phypa1|38196,Phypa1|24848,Phypa1|24724,Phypa1|36255,Phypa1|36990  
AT2G37990 Phypa1|15814,Phypa1|34593  
AT2G19980,AT2G19970,AT2G19990,AT1G50050,AT1G50060,AT4G33730,AT2G14580,AT2G14610,AT4G33720,AT3  
G19690,AT4G33710,AT5G26130,AT4G07820 Phypa1|15215,Phypa1|37640

AT4G25780  
Phypa1|1234  
AT5G66590  
Phypa1|20645,Phypa1|37883,Phypa1|360  
AT4G30320  
Phypa1|3095,Phypa1|2160  
AT5G57625,AT4G25790  
AT4G31470  
Phypa1|38449,Phypa1|6814  
AT5G02730,AT3G09590,AT1G01310  
AT2G34470  
Phypa1|2774  
AT1G51650  
Phypa1|24191,Phypa1|24253,Phypa1|2219  
Phypa1|39265,Phypa1|32849,Phypa1|8328  
AT5G01260  
Phypa1|33731,Phypa1|33955  
AT3G57930,AT2G42190  
Phypa1|32656  
AT3G25400  
Phypa1|39325,Phypa1|39746  
AT5G62790  
Phypa1|26866,Phypa1|26592,Phypa1|31136  
AT4G16600,AT2G35710  
Phypa1|24616,Phypa1|29957,Phypa1|39367  
Phypa1|25536  
AT1G78010  
Phypa1|3930  
AT5G25780,AT5G27640,AT1G49015  
Phypa1|2850,Phypa1|39067  
AT4G33945  
Phypa1|17993  
Phypa1|36470  
AT4G00100,AT3G60770  
Phypa1|36091,Phypa1|38903,Phypa1|24147  
AT1G31860  
Phypa1|29632  
Phypa1|31316  
AT5G10830,AT4G22530,AT1G55450,AT3G54150,AT3G61210,AT2G41380  
Phypa1|38314,Phypa1|25492  
Phypa1|33586,Phypa1|32903  
AT3G11740,AT5G01750,AT2G14560,AT1G33840,AT3G16900,AT3G56180,AT2G30270  
Phypa1|14521,Phypa1|34180,Phypa1|24199  
Phypa1|27962  
AT5G52110Phypa1|37389  
AT1G31812  
Phypa1|35982,Phypa1|24144  
Phypa1|33649  
AT1G20970,AT4G27500  
Phypa1|18745,Phypa1|35519,Phypa1|34814  
AT1G66730,AT5G17360,AT1G08130,AT1G49250  
Phypa1|39381  
AT5G11470,AT3G15605  
Phypa1|3915,Phypa1|33470  
AT4G15790  
Phypa1|11762,Phypa1|5141,Phypa1|33016,Phypa1|17147  
AT5G19180  
Phypa1|39562,Phypa1|39408  
AT4G34180,AT1G44542,AT4G35220  
Phypa1|27418  
AT3G11940,AT2G37270  
Phypa1|38994,Phypa1|38083,Phypa1|37023,Phypa1|4472,Phypa1|23906  
AT3G10920,AT3G56350  
Phypa1|30874,Phypa1|28653  
AT5G50810  
Phypa1|23703,Phypa1|24461  
AT2G42590  
AT1G26480  
Phypa1|39315,Phypa1|188,Phypa1|30220,Phypa1|24090,Phypa1|38710  
AT3G02520,AT5G16050,AT5G38480,AT4G09000,AT1G35160,AT1G78300  
Phypa1|36784,Phypa1|10089,Phypa1|39104,Phypa1|39103,Phypa1|37289,Phypa1|28175  
AT5G10450,AT5G65430  
AT1G34760  
AT2G10450,AT1G22290,AT1G22300,AT1G78220  
AT3G47860  
Phypa1|38041  
Phypa1|32334  
AT3G54050  
Phypa1|38325,Phypa1|39169  
AT1G43670  
Phypa1|24368,Phypa1|39672  
AT5G64380  
Phypa1|27471,Phypa1|31944,Phypa1|2271  
AT5G51670,AT5G04550,AT3G23160  
Phypa1|969,Phypa1|37384,Phypa1|10908  
AT5G08280  
Phypa1|37915,Phypa1|27781,Phypa1|29775  
Phypa1|30868  
AT1G53210,AT2G34020,AT2G34030,AT1G29020  
Phypa1|26327,Phypa1|24371,Phypa1|24688,Phypa1|25247  
Phypa1|38992  
AT2G22080,AT3G15357  
AT3G50550  
Phypa1|20734  
AT2G11910  
Phypa1|20917,Phypa1|3387,Phypa1|8760  
AT1G07780,AT5G05590,AT1G29410  
Phypa1|31233,Phypa1|648  
Phypa1|3067,Phypa1|30805,Phypa1|3099,Phypa1|31043,Phypa1|22583,Phypa1|30934,Phypa1|3087  
AT1G04710,AT2G33150  
Phypa1|26411,Phypa1|38706  
AT5G48880  
Phypa1|30031  
AT5G02240,AT2G37660  
Phypa1|32289,Phypa1|24032,Phypa1|27933  
AT1G79500,AT1G16340  
Phypa1|23625,Phypa1|24127  
AT5G26610  
Phypa1|24800  
AT3G19970,AT2G18245  
Phypa1|1022,Phypa1|516  
AT4G19820,AT4G19810,AT4G19740,AT4G19720,AT4G19730,AT4G19750,AT4G19760,AT4G19770,AT4G19800  
Phypa1|2318  
Phypa1|30407,Phypa1|28228  
AT1G09780,AT3G08590  
Phypa1|3070,Phypa1|2487,Phypa1|34753,Phypa1|15993,Phypa1|37320  
AT5G42930,AT1G56630,AT1G45201,AT5G67050,AT3G14360  
Phypa1|5685  
Phypa1|280,Phypa1|31004,Phypa1|25533,Phypa1|24348,Phypa1|24299,Phypa1|24351,Phypa1|38521,Phypa1|2565  
AT1G20570,AT1G80260  
Phypa1|16840,Phypa1|8560  
AT5G06360  
Phypa1|37258

AT3G23280,AT4G14365 Phypa1|37226,Phypa1|36656,Phypa1|28863,Phypa1|28125  
AT5G20000,AT5G19990 Phypa1|34976  
Phypa1|7257,Phypa1|7729  
AT1G07510,AT2G29080 Phypa1|35500,Phypa1|39742,Phypa1|36403  
AT1G50250,AT5G42270 Phypa1|26115,Phypa1|38216  
AT3G15120 Phypa1|1514  
Phypa1|35773,Phypa1|17699  
AT1G79560 Phypa1|7730  
AT1G45000,AT5G43010 Phypa1|38880,Phypa1|23796,Phypa1|38246  
Phypa1|23308  
AT4G04180 Phypa1|36870  
Phypa1|23560  
AT5G53170 Phypa1|36008  
AT5G58290 Phypa1|34968,Phypa1|39149,Phypa1|33403,Phypa1|25838  
AT5G64580 Phypa1|37325  
AT3G16290 Phypa1|38695  
Phypa1|31456  
Phypa1|30039  
AT1G53780 Phypa1|34975  
AT4G23940 Phypa1|36043,Phypa1|37070  
AT5G15250 Phypa1|23012,Phypa1|30583  
AT5G58870,AT3G47060 Phypa1|24830  
AT2G20140,AT4G29040 Phypa1|37075,Phypa1|36048,Phypa1|24567  
AT2G26140 Phypa1|36209,Phypa1|37482  
AT1G53750 Phypa1|39165,Phypa1|32856  
Phypa1|35106  
AT1G06430,AT2G30950 Phypa1|34184,Phypa1|24791,Phypa1|27801,Phypa1|28691  
AT3G04340 Phypa1|37402,Phypa1|37681  
AT3G05530,AT1G09100 Phypa1|19778,Phypa1|29111  
AT3G02450 Phypa1|39314  
AT4G04260,AT4G22140,AT4G39100 Phypa1|2082,Phypa1|29822,Phypa1|24071,Phypa1|13519,Phypa1|36914,Phypa1|30378,Phypa1|2897  
AT2G20635,AT2G33560 Phypa1|29644  
AT2G45330,AT5G23600 Phypa1|37630  
AT1G29990 Phypa1|37408  
AT1G20180,AT3G49070 Phypa1|6423  
AT1G03990,AT3G23410,AT4G28570,AT4G19380 Phypa1|26220,Phypa1|24711,Phypa1|36614  
AT3G48070,AT5G62910,AT1G74870 Phypa1|33185,Phypa1|32449,Phypa1|32082,Phypa1|34445  
AT5G67490 Phypa1|1671  
AT4G39690 Phypa1|35610  
AT3G49080 Phypa1|30168  
AT5G35570 Phypa1|26685,Phypa1|28031,Phypa1|29729,Phypa1|26154,Phypa1|34655  
AT3G30300,AT3G03810 Phypa1|27741  
AT5G65470,AT4G24530 Phypa1|29081  
AT2G44500,AT3G07900,AT5G63390  
AT1G20550,AT1G76270,AT4G38390 Phypa1|26176  
AT2G03280,AT1G14020,AT3G02250,AT5G15740 Phypa1|29963  
AT1G52630 Phypa1|30336  
AT2G01480,AT1G14970,AT1G35510,AT1G38065,AT1G38131 Phypa1|26107,Phypa1|38202,Phypa1|4407  
AT4G16650 Phypa1|30749,Phypa1|25555,Phypa1|24858  
Phypa1|27034  
Phypa1|18661,Phypa1|11844  
AT1G22460 Phypa1|38786,Phypa1|26963  
Phypa1|8833  
AT1G04910 Phypa1|26920  
AT5G64600  
AT2G37980,AT3G54100,AT5G01100  
AT1G62330,AT1G11990 Phypa1|2726,Phypa1|27569  
AT1G29200  
AT3G26370 Phypa1|28637  
Phypa1|28888  
AT5G23240 Phypa1|26363  
AT3G46180,AT5G59740 Phypa1|34722,Phypa1|23853  
AT5G13450 Phypa1|24203,Phypa1|37222,Phypa1|27037,Phypa1|31041  
AT1G33270 Phypa1|25634  
AT3G20270,AT1G04970 Phypa1|3192  
AT3G29170 Phypa1|842,Phypa1|843,Phypa1|1262  
AT1G58180,AT4G33580 Phypa1|34568  
Phypa1|23984,Phypa1|26119,Phypa1|27053,Phypa1|29558  
Phypa1|38416,Phypa1|32699  
AT1G23730,AT1G70410,AT3G01500,AT5G14740  
AT5G42660 Phypa1|26751  
Phypa1|36140,Phypa1|37878  
Phypa1|29083  
AT2G02910  
AT5G46220 Phypa1|19797  
AT4G09630,AT1G34550  
AT4G38500 Phypa1|39080

AT1G53040,AT1G28240  
AT4G12130 Phypa1|37607,Phypa1|27134  
AT2G44950 Phypa1|38572,Phypa1|30365,Phypa1|29075,Phypa1|39427,Phypa1|25026  
AT1G55255  
Phypa1|34862  
AT1G55250  
AT5G66060,AT4G35810,AT2G17720 Phypa1|176,Phypa1|24914  
AT1G20270  
Phypa1|611  
AT4G33910,AT2G23096 Phypa1|5450,Phypa1|34355  
AT3G06300,AT5G18900  
AT2G43080 Phypa1|38197  
Phypa1|30802  
AT4G25600  
AT4G35820  
AT3G28490,AT3G28480  
AT4G24840 Phypa1|32822,Phypa1|23836  
AT2G21150Phypa1|28738,Phypa1|27419  
AT1G54780 Phypa1|27890,Phypa1|1101  
AT3G51970,AT5G55350,AT5G55360,AT5G55340,AT5G51420,AT5G55330,AT1G34500,AT1G34520,AT1G34490,AT5  
G55320,AT5G55370,AT5G55380 Phypa1|32387,Phypa1|26904  
AT4G02220 Phypa1|16771,Phypa1|38227  
AT3G47440,AT4G01470,AT2G36830,AT3G26520,AT1G73190,AT1G17810,AT2G25810,AT3G16240,AT4G17340,AT5  
G47450,AT1G52180 Phypa1|35208  
AT1G08860,AT5G61900,AT5G07300 Phypa1|39567  
AT3G05010,AT5G27210 Phypa1|31227,Phypa1|23805,Phypa1|26511  
Phypa1|6254  
AT2G28105 Phypa1|6540  
AT4G04320 Phypa1|25912  
AT3G14270,AT4G33240,AT1G71010,AT1G34260 Phypa1|1748,Phypa1|25819,Phypa1|25829,Phypa1|38692  
AT3G44890 Phypa1|35884,Phypa1|39780,Phypa1|26128,Phypa1|26147  
AT5G51690,AT1G62960 Phypa1|37721  
AT5G28360,AT3G61510,AT1G01480,AT4G11280,AT5G65800,AT3G49700,AT2G22810,AT4G37770,AT4G08040,AT4  
G26200 Phypa1|8062,Phypa1|30335  
AT1G33970,AT1G33910,AT1G33900,AT1G33930,AT1G33890,AT1G33830,AT2G26820,AT1G33870,AT1G33880,AT1  
G33960,AT1G33950,AT2G34315,AT5G47270,AT4G09930,AT4G09940,AT4G09950 Phypa1|24310  
AT5G47650,AT4G25434,AT2G04440,AT2G04430,AT2G04450,AT4G12720 Phypa1|38257,Phypa1|25922  
AT5G47240  
Phypa1|3519  
AT4G32040,AT5G25220,AT5G11060,AT1G62990 Phypa1|26957,Phypa1|2880  
Phypa1|19058,Phypa1|25686  
AT1G04730 Phypa1|3403  
AT1G18860,AT5G15130,AT1G69810,AT4G01720,AT4G22070,AT4G04450,AT1G62300 Phypa1|3539  
AT5G21040 Phypa1|39147  
AT5G46230,AT1G30020,AT1G56580,AT1G09310,AT5G49600,AT4G24130  
Phypa1|2190,Phypa1|26306,Phypa1|29940  
AT5G25360,AT1G15350,AT3G15770,AT3G54880,AT5G03440  
Phypa1|27550,Phypa1|36277,Phypa1|38009,Phypa1|1344,Phypa1|30292  
Phypa1|31186  
AT5G16290,AT2G31810 Phypa1|6266,Phypa1|28485  
AT1G27210,AT1G59850,AT5G62580,AT2G07170,AT1G50890,AT4G27060  
Phypa1|36513,Phypa1|903,Phypa1|20447,Phypa1|28752  
AT2G40690 Phypa1|37904,Phypa1|28152,Phypa1|389  
AT5G10820,AT5G25040,AT5G25050,AT1G79710 Phypa1|36520  
AT5G46420 Phypa1|27556  
AT4G26480,AT5G56140,AT2G38610,AT3G08620,AT1G09660 Phypa1|24048,Phypa1|36735,Phypa1|39389  
AT4G33140 Phypa1|28374  
AT4G10940,AT4G10930 Phypa1|34554  
AT1G35340 Phypa1|25222  
AT4G22330 Phypa1|36585,Phypa1|24112,Phypa1|37516,Phypa1|36757  
AT3G19720 Phypa1|37906,Phypa1|36392,Phypa1|35089  
Phypa1|33578  
AT1G53310,AT3G14940,AT2G42600  
Phypa1|34402,Phypa1|15097,Phypa1|39617,Phypa1|36274,Phypa1|38826,Phypa1|26074  
AT3G42628 Phypa1|23884  
AT1G68750  
AT5G02250 Phypa1|25740  
AT1G50510 Phypa1|24088  
AT5G48020 Phypa1|23852,Phypa1|35114  
AT4G23440,AT5G56220 Phypa1|27132,Phypa1|28607,Phypa1|27433  
AT1G12380,AT1G62870 Phypa1|37692,Phypa1|27670,Phypa1|37048,Phypa1|2559,Phypa1|4187  
AT5G08170 Phypa1|32536,Phypa1|25724  
AT2G02370,AT4G12000,AT4G22850,AT1G12450 Phypa1|190  
AT1G44575 Phypa1|29338  
AT2G26680 Phypa1|33588  
AT4G33760 Phypa1|24776  
Phypa1|23661,Phypa1|23474  
AT1G50170 Phypa1|30482  
Phypa1|26882  
AT1G80300,AT1G15500 Phypa1|37820,Phypa1|28575  
AT2G47300,AT2G47290 Phypa1|4172  
AT5G45420 Phypa1|32726,Phypa1|31733,Phypa1|36785

AT2G43640 Phypa1|37805  
 AT5G17710,AT1G36390 Phypa1|29633,Phypa1|30311  
 AT3G07690,AT2G41540 Phypa1|30071,Phypa1|27740  
 AT3G04740 Phypa1|28903,Phypa1|28908,Phypa1|13086  
 AT1G10490,AT3G57940 Phypa1|27333  
 AT2G38950  
 AT1G08620 Phypa1|8696,Phypa1|27960  
 AT5G46910,AT1G63490 Phypa1|17374,Phypa1|17365  
 Phypa1|35899  
 AT1G30810,AT2G34880,AT4G20400  
 AT2G35075,AT4G21520 Phypa1|37034  
 AT3G03060,AT5G16930,AT4G36580,AT2G18330 Phypa1|37114,Phypa1|38946  
 AT3G12850,AT3G61140 Phypa1|37927,Phypa1|36307  
 AT2G27120,AT1G08260 Phypa1|28059  
 AT1G65590 Phypa1|26776  
 Phypa1|16246  
 AT3G55260  
 AT1G55915 Phypa1|26854  
 AT1G05900,AT2G31450 Phypa1|31409,Phypa1|23514,Phypa1|26647  
 Phypa1|590  
 AT1G78090,AT1G22210,AT1G35910,AT4G39770,AT2G22190,AT5G65140,AT5G10100  
 Phypa1|28189,Phypa1|38578,Phypa1|28927,Phypa1|30139,Phypa1|36313,Phypa1|29215,Phypa1|26151  
 AT5G51460,AT4G12430,AT4G22590  
 AT3G27850,AT3G27830,AT3G27840 Phypa1|2170,Phypa1|1592,Phypa1|1183,Phypa1|757  
 AT5G51200 Phypa1|33614,Phypa1|28925  
 AT4G35160,AT4G35150 Phypa1|27773  
 Phypa1|11804  
 AT1G26910,AT1G14320,AT1G66580 Phypa1|24411,Phypa1|36195,Phypa1|35504,Phypa1|39733  
 AT2G03810,AT1G13650 Phypa1|32166  
 AT1G03370,AT5G50170,AT4G03000  
 Phypa1|26706,Phypa1|37866,Phypa1|39519,Phypa1|28260,Phypa1|36235  
 AT1G77020,AT1G21080,AT1G76700  
 Phypa1|29987,Phypa1|25537,Phypa1|30570,Phypa1|14563,Phypa1|28399  
 AT4G39150,AT2G21510 Phypa1|1425  
 AT2G31340 Phypa1|35452  
 AT1G73470 Phypa1|28693  
 AT3G04850,AT4G14770,AT3G22760,AT3G22780 Phypa1|2124,Phypa1|34532,Phypa1|2123  
 Phypa1|29780  
 AT5G27560 Phypa1|26502  
 AT4G10120,AT5G11110,AT5G20280,AT1G04920 Phypa1|38702,Phypa1|39072  
 Phypa1|13407  
 AT5G58750 Phypa1|23153  
 AT4G24220 Phypa1|23705  
 AT2G19530,AT1G55160 Phypa1|32893  
 AT1G12370 Phypa1|36778  
 Phypa1|6368  
 Phypa1|35822,Phypa1|37285  
 AT1G68725  
 AT3G02670  
 Phypa1|5591,Phypa1|23155,Phypa1|20713  
 AT2G14890,AT2G23130,AT4G37450  
 Phypa1|29500  
 AT5G65390,AT5G10430,AT2G22470,AT4G09030  
 AT5G04910 Phypa1|9031  
 AT5G49410,AT1G73940 Phypa1|2198,Phypa1|11235  
 AT1G47980,AT3G62730 Phypa1|6645,Phypa1|26059,Phypa1|7738,Phypa1|3893,Phypa1|28142  
 AT1G13770,AT3G45890 Phypa1|25173  
 AT1G76120,AT1G20370 Phypa1|15381,Phypa1|37881  
 AT1G48570 Phypa1|26660  
 AT1G70650,AT1G55040 Phypa1|13437  
 AT2G31890 Phypa1|28401  
 AT3G51040,AT2G26070 Phypa1|25463,Phypa1|25425  
 AT3G04890 Phypa1|25143  
 AT2G46100 Phypa1|1126  
 Phypa1|38090  
 AT5G19690  
 Phypa1|20760  
 AT1G34130 Phypa1|36988  
 AT1G55350 Phypa1|37457  
 AT5G51130 Phypa1|33665  
 Phypa1|26736,Phypa1|77  
 AT1G47056,AT4G07400,AT5G67250,AT3G50080  
 Phypa1|9740  
 AT4G31600 Phypa1|25605,Phypa1|39719,Phypa1|609  
 AT4G32520 Phypa1|34398,Phypa1|28668  
 Phypa1|6529  
 Phypa1|31368  
 Phypa1|23318  
 AT1G22020,AT1G36370 Phypa1|2685,Phypa1|39316,Phypa1|37697  
 AT4G13930,AT4G13890 Phypa1|6429,Phypa1|37872  
 AT4G37930,AT5G26780 Phypa1|26993,Phypa1|25274  
 Phypa1|2401



AT5G14530,AT5G66240 Phypa1|37078,Phypa1|25483  
AT1G03130,AT4G02770 Phypa1|27607,Phypa1|24121,Phypa1|24287,Phypa1|26954  
Phypa1|30797  
AT1G13950 Phypa1|14679  
AT1G26630,AT1G69410  
AT2G03290,AT2G03040,AT1G14010,AT1G69460,AT1G26690,AT3G29070,AT1G57620,AT1G09580,AT1G21900,AT3  
G10780 Phypa1|39580,Phypa1|36826  
AT1G67650,AT1G67680 Phypa1|37716  
AT1G49330,AT2G16190 Phypa1|615,Phypa1|33534  
AT2G34110,AT1G34355 Phypa1|35847,Phypa1|31907,Phypa1|33179  
AT1G11060,AT1G61030 Phypa1|35371  
AT1G66570,AT2G14670,AT5G43610,AT5G06170,AT1G71890,AT1G71880,AT1G22710  
AT1G09960 Phypa1|37670,Phypa1|38921,Phypa1|27248,Phypa1|37682  
AT2G02860 Phypa1|37763,Phypa1|31622  
AT2G38770 Phypa1|38135  
Phypa1|6634  
AT3G50590 Phypa1|26198  
AT5G36000,AT3G61730,AT3G62500 Phypa1|30389  
AT5G02480,AT2G37570,AT3G12570 Phypa1|36004,Phypa1|38087,Phypa1|34185  
AT1G30550,AT1G45231 Phypa1|27320  
Phypa1|27605,Phypa1|33104  
AT2G26890 Phypa1|18900  
AT1G74260 Phypa1|35637  
Phypa1|23643  
Phypa1|31459  
AT2G27960,AT2G27970 Phypa1|32513,Phypa1|35985  
AT5G61770 Phypa1|38339  
AT2G40080,AT2G29950,AT2G06255,AT1G17455,AT1G72630 Phypa1|2210  
AT1G71500 Phypa1|2010  
AT1G10580 Phypa1|20478  
AT5G54520 Phypa1|25963  
AT5G13760 Phypa1|28806,Phypa1|25705,Phypa1|39559  
AT3G32930 Phypa1|25619  
AT2G19385,AT2G19380 Phypa1|15349,Phypa1|3169  
AT4G00590 Phypa1|26291  
AT2G27730 Phypa1|35474,Phypa1|33073  
AT3G14450,AT1G53650,AT3G49390,AT5G24440,AT1G32790,AT4G10610 Phypa1|26596,Phypa1|39287  
AT3G48030 Phypa1|1306,Phypa1|32830  
AT3G54190,AT2G38630 Phypa1|36185,Phypa1|23768  
Phypa1|33192  
AT3G21300 Phypa1|23226,Phypa1|22118,Phypa1|20555,Phypa1|22975,Phypa1|38856  
AT3G12990,AT3G60500 Phypa1|27446  
AT4G04190 Phypa1|26378  
AT1G79975 Phypa1|37815,Phypa1|38724  
AT2G38040,AT5G44750 Phypa1|32212,Phypa1|34903,Phypa1|35152  
AT3G43540 Phypa1|14143  
AT1G65000 Phypa1|24148  
AT1G27930,AT1G67330,AT1G33800,AT4G09990,AT1G09610,AT1G71690,AT4G24910 Phypa1|25055  
AT5G03880  
AT4G10000 Phypa1|27724  
Phypa1|557  
AT5G56200,AT1G49900,AT1G27730,AT5G04340,AT5G43170,AT3G19580,AT3G49930,AT5G67450  
Phypa1|25711  
AT2G26940,AT4G35280,AT2G17180,AT1G02040 Phypa1|197,Phypa1|647  
AT3G10380 Phypa1|26772,Phypa1|26188,Phypa1|24577  
AT1G28250 Phypa1|35403  
AT5G21482,AT4G29740,AT2G19500,AT5G56970,AT1G75450,AT2G41510,AT3G63440  
Phypa1|474,Phypa1|55,Phypa1|39789,Phypa1|956,Phypa1|29034,Phypa1|37672  
AT2G48050 Phypa1|25538,Phypa1|25432  
AT2G48040 Phypa1|25441,Phypa1|25565  
AT2G43460,AT3G59540 Phypa1|24020  
Phypa1|38709,Phypa1|38573,Phypa1|39530  
AT1G34000 Phypa1|5773  
AT4G17180,AT5G58480  
Phypa1|23746,Phypa1|39198,Phypa1|2884,Phypa1|23987,Phypa1|8711,Phypa1|36071  
AT3G04010,AT5G18220,AT2G19440,AT1G64760  
Phypa1|27182  
AT5G20870,AT4G31140,AT5G58090  
AT5G64790  
AT3G24330  
Phypa1|12361  
AT5G51150,Phypa1|957,Phypa1|28161  
AT4G39940 Phypa1|39606,Phypa1|29379  
AT5G67520  
Phypa1|31396,Phypa1|30731  
AT2G14750,AT3G03900 Phypa1|26235,Phypa1|36115  
AT4G12570 Phypa1|28964,Phypa1|28285  
AT5G07090,AT5G58420,AT2G17360  
Phypa1|39750,Phypa1|36857,Phypa1|37856,Phypa1|38505,Phypa1|36408,Phypa1|3402,Phypa1|12855  
AT1G66520 Phypa1|30751,Phypa1|28233  
AT5G05930 Phypa1|35097,Phypa1|29854  
AT4G21090,AT4G05450 Phypa1|11186

AT3G46630,AT1G45230                   Phypa1|35969,Phypa1|25653  
 AT1G11880Phypa1|26492  
 AT1G48100,AT1G56710,AT1G02460,AT4G01890  
 AT3G07820,AT3G07840,AT3G07830,AT5G48140,AT3G07850,AT3G14040,AT1G78400,AT2G33160,AT4G13760,AT2  
 G40310,AT2G15460,AT2G15470,AT2G15450,AT2G26620,AT1G43090,AT1G43100,AT1G43080,AT1G17150,AT4G18  
 180,AT1G02790,AT2G43870,AT3G59850,AT1G65570,AT2G43860,AT2G43890,AT1G05650,AT1G05660,AT2G43880  
 AT5G14650,AT1G10640,AT1G60590                   Phypa1|36132  
 AT1G80170,AT1G23460,AT1G70500                   Phypa1|25154  
 AT2G41850,AT3G57510,AT3G07970  
 AT5G17200,AT5G27530,AT4G35670,AT5G44830,AT5G44840,AT3G15720,AT4G32370,AT4G32375,AT4G32380,AT1  
 G80140,AT5G39910  
 AT3G26610  
                   Phypa1|27551  
 AT2G37690,AT2G05140                   Phypa1|37241  
                   Phypa1|31450  
 AT5G52380,AT2G12880                   Phypa1|199  
 AT3G27430,AT5G40580                   Phypa1|32922,Phypa1|39298,Phypa1|29067  
 AT1G03210,AT4G02850,AT4G02860                   Phypa1|28595,Phypa1|1084,Phypa1|25493  
 AT1G22150,AT1G78000,AT4G08620                   Phypa1|3593,Phypa1|25316,Phypa1|36461,Phypa1|4602  
 AT5G10180,AT1G77990  
                   Phypa1|21578  
 AT5G13550,AT3G12520                   Phypa1|38613  
 AT1G23090,AT3G15990,AT3G51895,AT4G02700,AT5G19600  
 AT1G08960                   Phypa1|1822  
 AT3G14070,AT1G54115                   Phypa1|24339,Phypa1|1805  
 AT5G17860,AT5G17850  
 AT2G47670,AT3G62820,AT1G62760,AT5G62360,AT5G51520,AT4G25250,AT3G47670,AT3G47380,AT5G62350,AT4  
 G25260,AT4G12390,AT1G62770,AT5G20740,AT4G00080,AT5G62330,AT5G62340,AT2G01610,AT1G14890,AT1G23  
 205,AT1G70720                   Phypa1|6495,Phypa1|749  
 AT5G60190                   Phypa1|34309  
 AT4G33250                   Phypa1|28546,Phypa1|24473  
 AT1G65470                   Phypa1|19672  
 AT3G01370                   Phypa1|412,Phypa1|34056,Phypa1|25982  
 AT5G16180  
 AT3G18390  
                   Phypa1|31516  
 AT4G14510,AT3G23070,AT4G29750  
 AT3G25440                   Phypa1|32981  
 AT5G56290                   Phypa1|37347  
 AT2G39990                   Phypa1|29916,Phypa1|25639  
 AT2G06025                   Phypa1|11236  
 AT3G05060,AT5G27120,AT5G27140                   Phypa1|3537,Phypa1|23726,Phypa1|31765  
 AT1G56110,AT3G12860                   Phypa1|27227,Phypa1|38273  
 AT2G07360                   Phypa1|28972  
 AT5G48300                   Phypa1|2497,Phypa1|36810,Phypa1|24025,Phypa1|24405  
 AT5G19220  
                   Phypa1|30403,Phypa1|3448,Phypa1|24245,Phypa1|27416,Phypa1|36368,Phypa1|29306,Phypa1|30515,P  
 hypa1|15276  
 AT1G05610  
 AT1G27680,AT4G39210,AT2G21590  
                   Phypa1|8501  
 AT3G51610                   Phypa1|39712  
                   Phypa1|21079  
                   Phypa1|879,Phypa1|379  
 AT1G30280  
 AT4G36520,AT1G75310  
 AT4G12770,AT4G12780,AT1G21660                   Phypa1|880  
                   Phypa1|881  
 AT1G75100  
 AT2G31070,AT1G53230,AT3G15030                   Phypa1|28988  
 AT5G65960                   Phypa1|36232  
 AT5G19530                   Phypa1|36423,Phypa1|39511,Phypa1|38621,Phypa1|14021  
 AT4G15880,AT4G00690,AT3G06910                   Phypa1|29014  
                   Phypa1|2957  
 AT4G14746                   Phypa1|8572  
 AT5G01230                   Phypa1|23961  
 AT4G39870,AT2G05590                   Phypa1|640,Phypa1|1954,Phypa1|639  
 AT1G02750,AT4G02200,AT3G06760,AT5G49230,AT3G05700,AT5G26990,AT1G56280  
                   Phypa1|27671,Phypa1|37743,Phypa1|25737,Phypa1|1162  
 AT1G76405,AT1G20816                   Phypa1|11354,Phypa1|24255  
 AT1G15390                   Phypa1|25901,Phypa1|25310  
 AT5G03370                   Phypa1|27767,Phypa1|29242,Phypa1|36125  
 AT2G42680,AT3G58680  
                   Phypa1|36969,Phypa1|36352  
 AT3G24500                   Phypa1|24196  
 AT2G38050                   Phypa1|33835  
 AT1G77370,AT5G20500                   Phypa1|39261  
 AT5G50300  
 AT3G10960                   Phypa1|27648  
                   Phypa1|20616  
                   Phypa1|23257  
                   Phypa1|22107

AT5G35930 Phypa1|26478  
AT1G79230,AT1G16460 Phypa1|23480,Phypa1|31280,Phypa1|38793  
AT3G27700 Phypa1|21861,Phypa1|14968,Phypa1|32710  
AT4G21670,AT5G01270 Phypa1|26047,Phypa1|36308  
AT1G80950 Phypa1|1877  
Phypa1|1274  
AT5G13300,AT5G61980  
AT1G10870,AT1G60860 Phypa1|17770,Phypa1|25817,Phypa1|15366  
Phypa1|5232,Phypa1|17082  
AT3G58610 Phypa1|24234,Phypa1|29229  
Phypa1|31182  
AT5G67270,AT5G62500,AT3G47690  
Phypa1|26234,Phypa1|26248,Phypa1|24797,Phypa1|2307,Phypa1|4467  
AT1G06750,AT2G30630,AT1G04280 Phypa1|24719  
AT1G19400,AT1G75180,AT1G01500 Phypa1|28249,Phypa1|26618,Phypa1|3071  
AT5G55760 Phypa1|14050,Phypa1|21912,Phypa1|35535,Phypa1|29625  
AT3G56120 Phypa1|28641  
AT3G16990 Phypa1|23944  
AT1G32080 Phypa1|37305,Phypa1|26610  
AT1G07270,AT2G29680 Phypa1|25598  
AT4G14330 Phypa1|9521  
Phypa1|7770  
AT2G22610  
AT2G36200  
Phypa1|26856,Phypa1|29666,Phypa1|25094  
AT3G45850,AT2G28620 Phypa1|31612,Phypa1|31825,Phypa1|19262,Phypa1|34207  
AT1G12430,AT1G01950 Phypa1|25015,Phypa1|29696,Phypa1|17571,Phypa1|25336  
AT1G59540  
Phypa1|19503,Phypa1|17488  
AT3G10180  
Phypa1|10575  
AT5G02370,AT5G23910  
Phypa1|24456  
AT3G12020,AT5G06670  
AT5G60930  
AT2G47500,AT5G27000,AT1G09170  
AT4G05190,AT4G21270,AT4G27180,AT5G54670 Phypa1|27193,Phypa1|27028  
AT4G26660 Phypa1|28559  
AT1G55550  
AT3G63480 Phypa1|28999  
AT5G65930 Phypa1|32087,Phypa1|35566,Phypa1|10750,Phypa1|34608  
AT5G27950  
Phypa1|24802,Phypa1|30537  
AT5G33300  
Phypa1|2615  
AT3G19050 Phypa1|25938  
Phypa1|11667,Phypa1|34929,Phypa1|25835  
AT3G17360 Phypa1|28163  
Phypa1|3642  
Phypa1|4739,Phypa1|19941  
AT3G54870  
Phypa1|25008  
Phypa1|34845,Phypa1|26893  
AT1G21730 Phypa1|28455,Phypa1|26792  
AT1G72250  
AT5G27550  
AT1G18410,AT1G73860,AT1G63640,AT5G41310  
Phypa1|27489  
AT2G37420  
AT3G44730  
Phypa1|20126  
Phypa1|17  
AT1G18550  
Phypa1|27582  
AT1G18370,AT3G43210 Phypa1|7749,Phypa1|30205,Phypa1|29461  
Phypa1|26658  
Phypa1|26027  
Phypa1|12131  
AT5G55520 Phypa1|1615  
Phypa1|101,Phypa1|28269,Phypa1|28408  
Phypa1|25385  
AT5G66310,AT3G51150,AT2G21300,AT4G38950,AT5G42490,AT4G24170  
Phypa1|27415  
Phypa1|26332  
Phypa1|26137,Phypa1|29527  
AT3G23670,AT4G14150 Phypa1|27265,Phypa1|32198,Phypa1|24408,Phypa1|24417  
AT3G16060 Phypa1|947,Phypa1|27000,Phypa1|29788  
Phypa1|33455  
AT4G39050,AT2G21380  
Phypa1|30236  
AT3G44050 Phypa1|27269,Phypa1|27904  
Phypa1|406,Phypa1|25720,Phypa1|27121

Phypa1|26483  
Phypa1|1238  
AT1G20060  
AT3G20150  
AT3G49650 Phypa1|24729,Phypa1|29424  
Phypa1|29314  
AT3G10310  
AT5G47820,AT3G50240 Phypa1|27029,Phypa1|402,Phypa1|1750  
Phypa1|26853,Phypa1|26366  
Phypa1|26553,Phypa1|38763  
Phypa1|1623  
AT5G39250 Phypa1|24621  
AT1G10840 Phypa1|29267,Phypa1|29325,Phypa1|17308  
AT5G18420 Phypa1|36783,Phypa1|34289,Phypa1|33450  
AT5G63330  
AT2G34900,AT3G52280 Phypa1|30238,Phypa1|31794,Phypa1|24531  
AT1G06230,AT1G73150,AT1G17790 Phypa1|26775,Phypa1|4681  
Phypa1|19966  
AT5G10550,AT5G65630  
AT5G63320 Phypa1|31814  
Phypa1|34076  
AT3G27260,AT3G01770,AT5G14270,AT5G46550  
Phypa1|34909  
AT4G38930,AT2G21270,AT2G29070 Phypa1|24030  
AT2G45530 Phypa1|24527,Phypa1|19287,Phypa1|18696,Phypa1|18695  
AT3G21540 Phypa1|37546,Phypa1|37548  
Phypa1|14918  
AT1G18400,AT1G73830,AT1G25330  
AT4G34530 Phypa1|1204  
AT1G51140Phypa1|25757  
Phypa1|24714  
AT5G62610,AT1G59640  
Phypa1|2112,Phypa1|35354  
AT1G10120  
AT1G35460,AT4G09180 Phypa1|27094,Phypa1|34738,Phypa1|2180,Phypa1|29626  
AT2G18300,AT4G36540  
AT3G23690  
AT5G50915  
Phypa1|19678  
Phypa1|2115  
Phypa1|2181  
Phypa1|2116,Phypa1|1566,Phypa1|2102,Phypa1|29695  
AT3G07340,AT5G48560 Phypa1|2182  
AT1G68920,AT1G26260 Phypa1|9796,Phypa1|26767  
AT3G42310,AT2G43010,AT3G59060,AT5G61270,AT1G09530,AT4G36930,AT2G46970  
AT3G57800,AT2G42300  
Phypa1|14524,Phypa1|29639  
AT1G53120 Phypa1|25994  
Phypa1|1289  
Phypa1|29033  
Phypa1|26159,Phypa1|29727,Phypa1|28960,Phypa1|179,Phypa1|28190  
AT5G02320,AT3G09370,AT4G00540  
AT2G37630  
Phypa1|3034  
AT4G21440,AT4G05100 Phypa1|29971  
AT3G08500,AT5G12870,AT5G40330,AT5G14750,AT3G27920,AT5G52600  
AT2G26950,AT2G26960  
Phypa1|24333  
AT3G13540  
AT3G55730,AT2G39880  
AT2G32460  
Phypa1|274  
Phypa1|28974  
Phypa1|27302  
AT3G09230  
AT4G22680  
Phypa1|1598  
AT5G54230  
AT3G11440,AT5G06100  
Phypa1|265  
AT1G66390,AT1G56650,AT1G66380,AT1G66370  
AT1G66230,AT5G16600  
AT5G40360,AT3G27785,AT5G40430,AT2G25230  
Phypa1|24427  
Phypa1|28330  
AT3G62610,AT2G47460,AT5G49330  
Phypa1|1439  
AT1G74080,AT1G18570,AT5G60890,AT2G31180,AT1G06180,AT3G23250,AT1G79180,AT1G16490,AT3G12820,AT1  
G56160  
Phypa1|655  
AT3G61250  
Phypa1|37229

AT2G02820,AT1G14350  
AT5G14340 Phypa1|20984,Phypa1|33390,Phypa1|1513  
Phypa1|24768  
AT5G35550  
AT5G67300,AT3G50060  
AT5G57620,AT2G36890,AT5G23000,AT5G65790,AT3G49690,AT4G37780  
Phypa1|30093  
Phypa1|26337,Phypa1|26855  
AT3G60460 Phypa1|1603,Phypa1|2169  
Phypa1|3028  
Phypa1|1574,Phypa1|38491  
AT1G71030  
AT4G26930,AT5G55020  
AT4G18770  
Phypa1|310  
Phypa1|269  
AT5G15310,AT3G01140  
AT5G56110Phypa1|1184  
AT5G39700  
AT4G09460,AT1G35515,AT1G22640,AT4G38620,AT2G16720,AT4G34990  
Phypa1|25978  
Phypa1|35925  
AT4G17785 Phypa1|24659  
AT2G23290,AT4G37260  
AT1G73410,AT1G17950,AT1G26780,AT4G33450,AT3G29020,AT1G69560  
AT1G34670,AT5G65230,AT5G10280  
AT4G12350  
Phypa1|272  
Phypa1|29119  
AT5G26660 Phypa1|823  
AT1G57560,AT1G09540  
Phypa1|25392  
AT3G12720,AT3G13890,AT1G63910  
AT4G32730,AT5G11510 Phypa1|25823,Phypa1|27842  
AT1G18710,AT1G74430,AT5G62470,AT3G47600,AT3G28910,AT1G74650,AT1G08810  
AT3G46130,AT5G59780,AT3G53200  
AT5G16770,AT3G02940  
Phypa1|1599  
Phypa1|27601  
AT5G07700,AT5G07690,AT5G61420  
Phypa1|26126  
Phypa1|596  
AT1G18960  
AT4G01680 Phypa1|15841  
AT5G62320  
AT5G17800  
AT3G28470  
Phypa1|26566  
AT5G58850,AT5G11050 Phypa1|2191,Phypa1|2192  
AT1G68320,AT1G25340,AT1G48000,AT5G49620,AT3G06490,AT2G47190,AT5G40350,AT3G27810,AT3G01530,AT3  
G30210,AT4G13480,AT3G24310  
AT4G25560,AT5G52260,AT3G48920  
AT4G28110  
AT3G47700,AT1G08400 Phypa1|29573  
AT1G73350 Phypa1|2066,Phypa1|3043  
AT4G37830 Phypa1|14671,Phypa1|23812  
AT4G11560,AT4G23120,AT2G25120,AT3G43990 Phypa1|37176,Phypa1|35042  
AT1G08480 Phypa1|32769,Phypa1|24256  
AT5G40840,AT5G16270 Phypa1|26958  
Phypa1|26951  
AT5G50230 Phypa1|31651,Phypa1|2889  
Phypa1|14757  
Phypa1|27589  
AT2G05720,AT2G41500  
AT5G64730 Phypa1|3054  
AT5G16750 Phypa1|35297  
Phypa1|32878,Phypa1|34132  
Phypa1|21464  
Phypa1|27820,Phypa1|30516  
AT2G43770 Phypa1|26834,Phypa1|37119  
AT5G13480  
Phypa1|35015  
AT5G67320  
AT5G52820 Phypa1|32253  
Phypa1|25550  
Phypa1|37826  
AT4G02730  
Phypa1|2262  
AT4G32990,AT2G26060 Phypa1|551  
AT3G49660 Phypa1|2638,Phypa1|34138,Phypa1|14955  
Phypa1|19255,Phypa1|16351  
AT4G29830 Phypa1|23729,Phypa1|36199

Phypa1|37493  
AT1G71840 Phypa1|36332  
AT4G31790 Phypa1|37985  
AT2G29640 Phypa1|37300  
AT1G30460 Phypa1|31722  
AT4G11970Phypa1|33145  
AT1G64790 Phypa1|31783  
AT5G55810 Phypa1|24597,Phypa1|30989,Phypa1|17549,Phypa1|30112  
AT3G02220 Phypa1|2108  
AT1G79020,AT1G16690 Phypa1|16038,Phypa1|38217  
AT3G07530 Phypa1|16184  
AT5G49530 Phypa1|32316  
Phypa1|1690  
Phypa1|37255,Phypa1|1783,Phypa1|30,Phypa1|25  
AT2G01750,AT1G14840,AT1G68060,AT1G24764  
Phypa1|5207  
AT4G17220 Phypa1|19810,Phypa1|5188,Phypa1|5187,Phypa1|4438  
AT3G15220  
AT3G51850 Phypa1|31527,Phypa1|23889,Phypa1|3027,Phypa1|20129,Phypa1|17294,Phypa1|24431  
AT3G12200  
AT3G10660,AT5G04870,AT2G38910,AT4G38230,AT4G35310,AT2G17290,AT5G23580,AT4G09570,AT1G35670  
Phypa1|37514,Phypa1|39264,Phypa1|26231,Phypa1|36516,Phypa1|34536,Phypa1|37591,Phypa1|28533  
AT5G57565,AT5G57630  
AT5G14720  
AT2G46700 Phypa1|26540,Phypa1|23954,Phypa1|38949,Phypa1|24312,Phypa1|24364  
AT1G32320  
AT3G08720,AT3G08730  
AT3G20860  
AT1G18350,AT1G73500,AT3G06230  
Phypa1|27987,Phypa1|35955,Phypa1|37132  
Phypa1|25840,Phypa1|26507,Phypa1|26768  
AT5G40440 Phypa1|14319,Phypa1|27319  
AT5G56580  
Phypa1|39339  
AT5G66850  
Phypa1|43,Phypa1|37275,Phypa1|35341  
Phypa1|5737  
Phypa1|538,Phypa1|24839,Phypa1|1021,Phypa1|125  
Phypa1|974,Phypa1|29893  
AT1G79640 Phypa1|25947,Phypa1|30554,Phypa1|25505,Phypa1|24990,Phypa1|29219  
AT5G67080,AT3G50310,AT2G41910,AT2G05060,AT5G27790,AT2G34290,AT2G41920,AT5G12090,AT5G27510,AT2  
G42550,AT2G41930,AT2G40560,AT2G40500,AT2G40580  
AT4G40010  
AT3G61960  
Phypa1|27587,Phypa1|36523  
AT1G02970 Phypa1|37556  
AT1G78290  
Phypa1|34485,Phypa1|25767  
Phypa1|1655  
AT1G63700  
AT1G12680,AT1G08650,AT3G04530,AT1G12580  
AT5G35410 Phypa1|39353,Phypa1|28962  
AT1G69220 Phypa1|25611  
AT5G24430,AT3G49370  
Phypa1|7468  
AT1G60940,AT1G10940,AT5G63650,AT5G08590,AT2G23030  
AT2G30040,AT1G07150 Phypa1|147,Phypa1|148,Phypa1|601,Phypa1|25244,Phypa1|27467,Phypa1|36124  
AT1G48260,AT3G17510  
AT1G49180  
AT4G36070,AT2G17890,AT5G66210 Phypa1|27099,Phypa1|16180,Phypa1|39651,Phypa1|36872  
AT3G06030  
Phypa1|28325,Phypa1|28329,Phypa1|37651  
AT3G04810,AT5G28290,AT1G54510,AT3G63280  
AT2G45490  
Phypa1|5736,Phypa1|15797  
Phypa1|23978,Phypa1|25087,Phypa1|2652,Phypa1|9414  
AT1G01140,AT1G30270 Phypa1|36840,Phypa1|23822,Phypa1|6532  
AT5G39440  
AT5G20930  
AT3G21220,AT1G51660 Phypa1|38282,Phypa1|23905  
Phypa1|19380  
AT1G53570  
AT2G37840,AT3G53930 Phypa1|32429,Phypa1|413,Phypa1|38149  
Phypa1|30765  
Phypa1|33681  
AT4G24400  
AT3G44200  
AT1G77720  
AT5G10930,AT5G25110,AT2G25090,AT5G07070,AT5G58380,AT5G01810,AT5G45820,AT4G30960,AT4G18700,AT5  
G45810,AT2G34180,AT1G29230,AT5G01820,AT2G30360,AT2G38490,AT4G14580,AT3G23000  
AT4G32830,AT2G25880 Phypa1|15624,Phypa1|37411  
AT4G10730,AT4G24100

AT3G01090,AT3G29160 Phypa1|38389,Phypa1|35984  
 AT4G29810,AT4G26070  
 AT2G41860,AT3G57530,AT5G12480,AT5G19450  
 AT4G14480  
 AT4G04740,AT4G04720,AT4G21940,AT4G04710,AT1G50700,AT3G20410,AT1G61950,AT4G04700,AT4G04695,AT1G76040  
     Phypa1|30177  
     Phypa1|38439  
     Phypa1|38953,Phypa1|24291,Phypa1|1393  
 AT1G23700,AT1G70430  
 AT2G26980,AT5G21326  
     Phypa1|1455  
 AT1G74740,AT1G18890  
     Phypa1|18771  
     Phypa1|39471  
 AT1G54960,AT1G09000  
 AT3G46140,AT3G45790,AT3G45670,AT3G46160  
 AT5G19360,AT5G12180,AT4G23650  
     Phypa1|13985,Phypa1|38956,Phypa1|36976,Phypa1|39594,Phypa1|19279,Phypa1|38954  
 AT2G35890  
     Phypa1|30225  
 AT5G04510,AT3G10540 Phypa1|29091  
 AT2G31500  
 AT2G43930 Phypa1|21731  
     Phypa1|24733  
 AT5G60550,AT3G45240 Phypa1|26496,Phypa1|36285,Phypa1|1881,Phypa1|27322  
     Phypa1|21131,Phypa1|39218  
 AT5G55090,AT4G26890,AT1G05100,AT2G32510  
 AT1G50230 Phypa1|26849  
 AT4G33950,AT3G50500,AT5G66880 Phypa1|37660,Phypa1|37734,Phypa1|38979,Phypa1|23909  
 AT4G08500,AT4G08470  
     Phypa1|27425,Phypa1|36630  
 AT3G50530,AT3G19100,AT1G49580,AT2G41140,AT3G56760  
     Phypa1|6656  
 AT2G20060 Phypa1|31412,Phypa1|37387  
 AT1G31220 Phypa1|28413  
     Phypa1|30467  
 AT2G07698 Phypa1|1508,Phypa1|31038  
 AT3G02800,AT5G16480  
     Phypa1|39168,Phypa1|23803,Phypa1|24093,Phypa1|23947,Phypa1|27625,Phypa1|29586  
     Phypa1|37764  
 AT2G32960,AT1G05000,AT4G03960  
 AT3G05040 Phypa1|30125,Phypa1|28118  
 AT1G07980 Phypa1|19598  
 AT4G25610 Phypa1|8506  
 AT1G21840 Phypa1|34518  
 AT4G37300 Phypa1|776,Phypa1|38986  
 AT2G41020 Phypa1|29386  
 AT5G51700 Phypa1|15382,Phypa1|24263  
 AT1G14300 Phypa1|23983  
 AT4G26410,AT2G45060 Phypa1|32731  
 AT5G43130,AT1G27720 Phypa1|34510  
     Phypa1|17144  
 AT2G38750,AT5G12380,AT5G10220,AT5G10230,AT5G65020,AT1G35720,AT2G38760  
 AT1G68090  
     Phypa1|25871,Phypa1|39372,Phypa1|35968,Phypa1|35922,Phypa1|33717,Phypa1|7287,Phypa1|26572  
 AT1G58230,AT1G58227 Phypa1|29348  
 AT3G18524 Phypa1|5116,Phypa1|39450  
 AT4G33690 Phypa1|38717  
 AT1G48950,AT1G17210 Phypa1|35352  
 AT1G65890,AT1G65880,AT1G68270,AT1G66120,AT1G21540,AT1G21530,AT1G77240,AT5G16370,AT5G16340,AT1G75960  
     Phypa1|35981  
 AT1G20560,AT2G17650,AT1G76290  
 AT3G16910 Phypa1|16931  
     Phypa1|1497  
     Phypa1|31117,Phypa1|21360  
 AT2G40780 Phypa1|39282  
 AT5G11010Phypa1|29572  
 AT2G18220,AT3G55510 Phypa1|25208  
 AT1G55750,AT3G61420 Phypa1|30255  
     Phypa1|39489  
 AT4G16143,AT3G06720  
 AT1G32880,AT5G52000,AT5G49310  
 AT5G03070 Phypa1|28807,Phypa1|25710  
 AT1G09270 Phypa1|26077,Phypa1|39211,Phypa1|39398,Phypa1|37421,Phypa1|36682  
 AT3G05720  
 AT1G02690,AT4G02150  
     Phypa1|1961  
 AT5G04900 Phypa1|30323  
 AT4G13250 Phypa1|39302  
 AT5G12400,AT5G22760,AT5G35210 Phypa1|1242

AT1G13930,AT2G03440 Phypa1|33678,Phypa1|31930  
 AT5G65540 Phypa1|22702,Phypa1|32719  
 AT5G18580 Phypa1|5835,Phypa1|15494  
 AT2G36145 Phypa1|2120  
 AT5G58760 Phypa1|6612,Phypa1|37101  
 AT4G26980 Phypa1|27244  
 AT3G60150,AT2G44525 Phypa1|39435  
 AT2G26930 Phypa1|39154  
 Phypa1|14223  
 AT3G17660  
 AT5G54310 Phypa1|25888,Phypa1|34124  
 AT1G58290,AT1G09940,AT2G31250 Phypa1|24980,Phypa1|29473,Phypa1|35621,Phypa1|30870  
 AT2G26590 Phypa1|29747  
 AT5G16630 Phypa1|24909  
 AT3G14590,AT1G53590 Phypa1|35417,Phypa1|31587  
 AT1G43580 Phypa1|1004,Phypa1|26462  
 AT3G50660,AT5G14400,AT1G73340,AT5G05690,AT4G36380,AT3G13730  
 Phypa1|5974,Phypa1|27078,Phypa1|816,Phypa1|29705  
 AT1G19630 Phypa1|19301  
 AT1G12740,AT1G65670,AT4G15300,AT3G30290,AT4G15393,AT4G15396,AT4G15310,AT1G78490,AT5G48000,AT3  
 G44970,AT1G55940  
 AT2G32440,AT1G05160  
 AT3G30180,AT5G38970  
 AT2G42850 Phypa1|23818  
 AT3G19270,AT4G19230,AT5G45340,AT2G29090 Phypa1|39240  
 AT5G66810 Phypa1|29118  
 AT1G13030 Phypa1|34962  
 Phypa1|34208,Phypa1|10480  
 AT3G50690 Phypa1|27824,Phypa1|37138,Phypa1|30518  
 AT5G55670,AT1G13190 Phypa1|26049,Phypa1|28143  
 Phypa1|16275  
 AT1G53140 Phypa1|24610  
 AT1G48460,AT5G63040 Phypa1|1953  
 AT4G37210 Phypa1|20104  
 Phypa1|20103  
 Phypa1|118  
 AT5G57170,AT3G51660,AT5G01650 Phypa1|33766  
 Phypa1|23424,Phypa1|26528  
 Phypa1|39738,Phypa1|24145  
 AT3G02360,AT1G64190,AT5G41670 Phypa1|36715,Phypa1|37211  
 Phypa1|10201  
 Phypa1|30885  
 AT3G05780,AT3G05790,AT5G26860 Phypa1|24605  
 Phypa1|9053  
 AT5G47040 Phypa1|32269,Phypa1|10548,Phypa1|9052  
 AT1G04230,AT5G43720 Phypa1|24298  
 Phypa1|37262  
 AT1G18270  
 Phypa1|30422,Phypa1|31311,Phypa1|22561  
 Phypa1|701  
 AT3G26080,AT3G26070 Phypa1|35270  
 AT5G61290,AT5G07800,AT1G63390,AT1G63370,AT1G62620,AT1G62600,AT1G65860,AT1G62540,AT1G62560,AT1  
 G62570,AT1G12140,AT1G12130,AT1G12160,AT1G63340,AT1G62580,AT1G12200 Phypa1|38219  
 Phypa1|454  
 AT1G60530 Phypa1|14428,Phypa1|14419,Phypa1|14416  
 Phypa1|3560  
 Phypa1|23115,Phypa1|14427,Phypa1|1788,Phypa1|1789,Phypa1|1787,Phypa1|1786  
 AT1G60500,AT1G60540  
 AT3G26650,AT1G12900,AT1G42970  
 Phypa1|39089,Phypa1|13607,Phypa1|38223,Phypa1|24225,Phypa1|27175,Phypa1|29548  
 AT1G26170 Phypa1|26409  
 AT1G28530 Phypa1|33260  
 Phypa1|30993  
 Phypa1|21733,Phypa1|31223,Phypa1|30727  
 Phypa1|41  
 AT1G64550 Phypa1|38577  
 AT3G54540 Phypa1|36898,Phypa1|27825  
 Phypa1|3050  
 AT5G60790 Phypa1|32259,Phypa1|37497,Phypa1|39476  
 AT5G09930,AT5G64840 Phypa1|1367,Phypa1|38143  
 Phypa1|33869  
 Phypa1|16723  
 AT5G50340 Phypa1|25534  
 AT3G14120 Phypa1|38985  
 AT5G09880,AT2G16940 Phypa1|34685,Phypa1|37965  
 AT1G17620,AT5G11890 Phypa1|34162  
 AT3G56680,AT2G40960,AT5G05100,AT3G10770 Phypa1|33566,Phypa1|13050  
 AT1G51310  
 Phypa1|23466,Phypa1|31113,Phypa1|28216  
 Phypa1|501  
 Phypa1|11218  
 AT1G61000 Phypa1|33633



Phypa1|16685  
AT4G18465 Phypa1|24046  
AT1G27900 Phypa1|37166  
AT1G26370 Phypa1|27229  
Phypa1|9549  
AT2G47250,AT3G62310 Phypa1|36143,Phypa1|38304,Phypa1|39714  
Phypa1|28336  
AT1G32490,AT2G35340 Phypa1|36449  
AT4G16680  
AT1G33390 Phypa1|29924  
AT5G14900  
AT3G26560  
AT5G13010 Phypa1|35427  
AT2G47680,AT5G10370,AT4G01020  
Phypa1|29180  
AT1G76730 Phypa1|1050  
AT3G17340 Phypa1|16762,Phypa1|35179,Phypa1|19998  
AT3G06860 Phypa1|39209,Phypa1|26923  
Phypa1|21763  
AT4G16800 Phypa1|28876  
Phypa1|30815  
AT4G29010 Phypa1|35213  
Phypa1|30506  
Phypa1|30484  
Phypa1|28920,Phypa1|30809  
AT5G43280 Phypa1|39056  
Phypa1|30757  
AT3G15290 Phypa1|24896  
Phypa1|21974  
Phypa1|30818  
Phypa1|30004  
Phypa1|31242  
Phypa1|19361  
AT5G28050,AT3G05300 Phypa1|2434  
Phypa1|4411  
Phypa1|23044  
Phypa1|30447  
AT1G34380 Phypa1|36633  
AT5G02850 Phypa1|32516  
AT3G55080 Phypa1|30339,Phypa1|34373  
Phypa1|27109,Phypa1|28277  
Phypa1|34604  
AT4G17410,AT5G47430  
AT5G13720 Phypa1|30243,Phypa1|35964  
AT4G19390 Phypa1|35487  
Phypa1|11222  
AT4G24972,AT1G32583 Phypa1|11209,Phypa1|33924,Phypa1|2163,Phypa1|27474,Phypa1|16382  
Phypa1|9476  
AT4G14070,AT3G23790 Phypa1|16691,Phypa1|34806,Phypa1|28629  
AT3G05210 Phypa1|529,Phypa1|27788  
AT5G56130 Phypa1|39584  
AT3G51780,AT5G62100,AT5G07220,AT5G52060,AT5G40630,AT5G14360 Phypa1|23673,Phypa1|26547  
AT5G37530 Phypa1|38465  
AT1G18360,AT1G73480,AT5G11650 Phypa1|38860,Phypa1|27721  
AT1G35440  
Phypa1|666  
Phypa1|35026,Phypa1|39022  
AT2G26430 Phypa1|110,Phypa1|28034  
Phypa1|27829  
AT5G45190,AT4G19600 Phypa1|1843,Phypa1|27035,Phypa1|27833  
AT4G19560  
AT1G27630  
AT4G33180,AT5G21950,AT1G78210,AT5G09430,AT4G39955,AT1G72620,AT1G17430  
Phypa1|37627,Phypa1|39274,Phypa1|39227,Phypa1|37835,Phypa1|30551  
AT1G04480,AT2G33370,AT3G04400  
Phypa1|38759,Phypa1|38987,Phypa1|38261,Phypa1|37851,Phypa1|5026,Phypa1|26587,Phypa1|9348  
AT2G37580,AT3G18930  
AT2G20030,AT4G28890 Phypa1|27530  
Phypa1|33387  
AT5G05810  
AT4G33565  
AT1G76410,AT1G20823,AT4G35480,AT2G17450  
Phypa1|6983,Phypa1|19225,Phypa1|31875  
Phypa1|37509,Phypa1|746  
AT4G10150,AT4G10160,AT5G42200  
Phypa1|788  
AT1G04360,AT5G43420  
AT2G46160,AT3G61550  
Phypa1|1298,Phypa1|32040,Phypa1|2143,Phypa1|817,Phypa1|16721  
AT4G35840,AT2G17730,AT5G66070,AT1G74410  
AT1G22500,AT1G72200,AT5G27420,AT3G05200,AT4G09120,AT4G09110,AT4G09130,AT1G35330,AT2G34990,AT2G35000,AT4G09100,AT4G38140,AT4G40070

AT1G49230,AT1G49200,AT1G49220,AT1G49210,AT3G18773,AT5G01880,AT3G10910,AT5G05280,AT5G47610,AT4  
 G17245  
     Phypa1|2241  
 AT4G15975  
 AT5G10380  
     Phypa1|2240  
 AT5G41400,AT4G11370  
 AT2G18670,AT4G30370,AT3G19140,AT3G14320  
 AT2G27940           Phypa1|28065  
 AT2G35910,AT5G06490  
 AT2G34000,AT5G58580,AT2G42350,AT2G42360  
 AT3G11110  
 AT3G60966           Phypa1|1216  
 AT2G47560,AT3G62690  
 AT4G24015,AT1G24580  
 AT4G17920,AT2G35420,AT1G53010,AT5G41450,AT5G41430,AT5G41440,AT1G51930,AT3G43430,AT5G20885,AT2  
 G28920,AT4G00305  
 AT3G16720           Phypa1|314,Phypa1|1296  
 AT5G07040           Phypa1|36078,Phypa1|23787  
 AT3G03550,AT5G17600  
     Phypa1|2146,Phypa1|1594,Phypa1|2153,Phypa1|2154  
 AT1G64690,AT1G11690,AT3G20350,AT1G50660           Phypa1|29408,Phypa1|26979  
 AT5G23395           Phypa1|10586  
     Phypa1|16174  
 AT2G15350,AT2G15370,AT2G15390,AT1G14080,AT1G14110,AT1G14070,AT2G03220,AT2G03210,AT1G74420  
     Phypa1|489,Phypa1|30230  
 AT2G15360  
     Phypa1|15389,Phypa1|15388,Phypa1|32576,Phypa1|993,Phypa1|1933,Phypa1|33594,Phypa1|1931,Phyp  
 a1|37109,Phypa1|8559  
 AT4G11980Phypa1|27458  
 AT5G01200,AT2G38090,AT5G58900,AT5G05790,AT3G11280,AT4G39250,AT2G21650,AT1G19510,AT1G75250,AT4  
 G36570,AT5G61620,AT5G56840,AT1G70000,AT1G74840,AT1G19000,AT3G10580,AT4G09450,AT3G10585,AT3G10  
 590,AT5G47290,AT3G10595,AT5G04760,AT5G23650,AT1G49010,AT5G08520   Phypa1|1142,Phypa1|29471  
 AT2G21440           Phypa1|38155  
     Phypa1|18845  
 AT4G20920,AT4G20910           Phypa1|29724  
 AT1G72640           Phypa1|25959  
     Phypa1|31660  
 AT5G54730  
 AT1G54710,AT1G03380           Phypa1|31743,Phypa1|20709,Phypa1|29643,Phypa1|31661  
 AT1G09080  
 AT5G42020,AT5G28540           Phypa1|18732,Phypa1|39245  
     Phypa1|417  
 AT1G16030  
     Phypa1|29535,Phypa1|27405  
 AT5G09600  
 AT2G32120  
     Phypa1|18934,Phypa1|11245  
 AT5G09590,AT4G37910           Phypa1|36637,Phypa1|36638,Phypa1|37500,Phypa1|28736  
     Phypa1|3176  
 AT1G79920,AT1G79930           Phypa1|33247,Phypa1|36416,Phypa1|32005,Phypa1|16996  
 AT4G16660           Phypa1|25715  
     Phypa1|16573  
     Phypa1|2368  
     Phypa1|1536  
 AT1G11660  
 AT3G12580  
 AT5G02500,AT5G02490,AT3G09440,AT1G56410  
     Phypa1|31529,Phypa1|27394,Phypa1|39775,Phypa1|38513,Phypa1|39629  
     Phypa1|30224  
 AT5G49910,AT4G24280           Phypa1|28358,Phypa1|28363,Phypa1|24674  
     Phypa1|35080  
     Phypa1|34869  
 AT1G35550,AT1G07920,AT1G07930,AT1G07940,AT5G60390  
     Phypa1|33066,Phypa1|36629,Phypa1|38656,Phypa1|36631,Phypa1|9097,Phypa1|23680,Phypa1|31657,P  
 hypa1|31655,Phypa1|38838,Phypa1|35988  
 AT5G10630           Phypa1|17200  
 AT1G18070           Phypa1|26373  
 AT5G06440,AT3G11720           Phypa1|9609,Phypa1|33976  
 AT1G50670           Phypa1|24642  
 AT3G61480,AT5G28350           Phypa1|36340,Phypa1|38187  
 AT5G28440           Phypa1|6309  
 AT3G14180,AT1G54060,AT3G58630,AT3G11100,AT5G05550           Phypa1|33202  
     Phypa1|1712  
 AT4G36240  
     Phypa1|27853  
 AT3G51080,AT5G66320  
     Phypa1|1711  
 AT1G08000,AT1G08010,AT2G28340,AT3G45170  
 AT5G26930,AT4G26150,AT5G56860,AT5G49300,AT3G06740           Phypa1|28545,Phypa1|3728,Phypa1|33890  
 AT4G34680  
 AT3G24050

AT2G45050,AT3G60530  
Phypa1|1512,Phypa1|1710  
AT5G25830,AT4G32890  
AT3G20750,AT4G36620,AT3G50870,AT2G18380  
AT3G54810  
AT5G26040 Phypa1|26342,Phypa1|37187,Phypa1|6996  
AT4G38210,AT3G03220,AT5G39270,AT5G39290,AT5G39300,AT5G39280,AT5G39310,AT5G39260  
AT4G28250,AT2G20750  
AT4G17030  
AT1G12560,AT1G62980  
AT1G65680,AT3G60570,AT2G45110  
Phypa1|27392,Phypa1|678,Phypa1|29937,Phypa1|19231,Phypa1|29437,Phypa1|24736,Phypa1|34111  
Phypa1|1535,Phypa1|23741,Phypa1|26217,Phypa1|38456,Phypa1|38583,Phypa1|25741,Phypa1|8185,Phypa1|26211,Phypa1|26928,Phypa1|219,Phypa1|26917,Phypa1|26926,Phypa1|11585,Phypa1|21471,Phypa1|39754,Phypa1|16082,Phypa1|848,Phypa1|30288,Phypa1|34514,Phypa1|23765,Phypa1|37772,Phypa1|15910,Phypa1|25692,Phypa1|37761,Phypa1|29162,Phypa1|25792,Phypa1|11537,Phypa1|28804,Phypa1|25677,Phypa1|29565  
Phypa1|39592  
Phypa1|24874  
AT3G15370 Phypa1|37477,Phypa1|23693,Phypa1|30286  
AT1G20190,AT4G01630  
AT2G28950,AT3G55500,AT2G39700,AT2G37640,AT5G02260,AT1G69530,AT1G26770,AT2G03090,AT3G29030,AT5G56320,AT2G40610,AT5G05290 Phypa1|8573  
AT1G71790 Phypa1|24033  
AT5G45700,AT1G29770,AT1G29780,AT5G11860,AT4G18140,AT5G46410 Phypa1|30284  
AT2G45200 Phypa1|29211,Phypa1|8051,Phypa1|39698,Phypa1|31911  
AT5G01970,AT1G30050,AT2G30530,AT4G02800 Phypa1|1721  
AT5G58550,AT3G51770,AT4G02680 Phypa1|10998,Phypa1|24883  
AT3G25940 Phypa1|2442  
AT1G31480 Phypa1|36789  
AT3G61770 Phypa1|26718,Phypa1|26754  
AT1G24350,AT1G67600  
AT3G21610 Phypa1|2479  
AT3G12685 Phypa1|29869,Phypa1|26551  
AT2G25610,AT4G32530 Phypa1|37129,Phypa1|27369,Phypa1|37304,Phypa1|32488  
AT3G52210 Phypa1|30553  
Phypa1|1746  
AT3G55760  
AT1G42430 Phypa1|37270,Phypa1|27994  
AT2G04360 Phypa1|180  
AT3G28430 Phypa1|37116  
AT1G64500 Phypa1|34049,Phypa1|668,Phypa1|27655,Phypa1|2101  
Phypa1|24794  
AT5G03870 Phypa1|30388,Phypa1|669  
AT1G32760,AT4G10630,AT5G01420,AT3G11773,AT5G06470  
AT5G58530,AT5G13810,AT2G41330,AT3G57070,AT3G28850,AT5G39865  
AT5G39800,AT5G40080 Phypa1|39483  
AT5G47570 Phypa1|24806  
AT2G30390,AT5G26030 Phypa1|1403,Phypa1|25903,Phypa1|30289  
AT5G67290 Phypa1|25814  
AT2G35520,AT1G32210 Phypa1|39744,Phypa1|7996,Phypa1|27390  
AT1G65580,AT1G05630,AT2G31830,AT2G43900 Phypa1|29358  
AT3G47630 Phypa1|37598  
AT5G63400,AT5G50370 Phypa1|23728,Phypa1|38668,Phypa1|10217,Phypa1|31273,Phypa1|36304  
AT2G17340,AT2G17320,AT4G35360 Phypa1|24122  
AT1G08710 Phypa1|3737,Phypa1|3739  
Phypa1|31270  
AT2G33800 Phypa1|26557,Phypa1|24446,Phypa1|26141  
AT4G38440 Phypa1|9818,Phypa1|26336  
AT5G51430 Phypa1|37209  
Phypa1|22916,Phypa1|22670  
AT5G13570 Phypa1|30266,Phypa1|26508,Phypa1|26294  
AT1G49350 Phypa1|22764,Phypa1|38935  
AT1G02475,AT4G01883,AT1G02470 Phypa1|36271,Phypa1|29101,Phypa1|16448  
AT4G33640 Phypa1|2226  
AT4G30780,AT2G24100,AT1G54300,AT3G05770 Phypa1|1165,Phypa1|1167  
AT3G01420,AT1G73680 Phypa1|37393  
AT3G59600,AT1G54250 Phypa1|36287  
AT2G30920 Phypa1|1065  
AT1G05410 Phypa1|57,Phypa1|35010  
AT5G48390 Phypa1|16544,Phypa1|29205  
AT2G41160,AT3G56740 Phypa1|37044,Phypa1|36827,Phypa1|4024  
AT5G07360 Phypa1|36061,Phypa1|28520,Phypa1|18461  
AT3G48425 Phypa1|12584,Phypa1|37020  
AT1G15880 Phypa1|26485  
AT4G16170,AT4G16180 Phypa1|39616,Phypa1|37442  
AT2G33620,AT5G46640,AT4G17950,AT4G12080,AT4G22770,AT4G00200,AT5G62260,AT5G51590,AT4G25320  
Phypa1|15884,Phypa1|35821,Phypa1|32491,Phypa1|2047,Phypa1|16396,Phypa1|34821,Phypa1|31756  
AT2G45850,AT3G61310,AT1G63480,AT1G63470  
AT2G36560  
Phypa1|22534  
AT5G28590,AT3G04590  
AT1G79320,AT1G79330,AT1G79340,AT1G79310,AT1G16420,AT5G04200

Phypa1|28528,Phypa1|26069,Phypa1|26086,Phypa1|3407,Phypa1|38053  
AT2G02390,AT2G02380 Phypa1|38017  
AT4G02390 Phypa1|30081  
AT2G31320 Phypa1|37102  
Phypa1|26593  
AT5G22470 Phypa1|9119  
AT5G23080 Phypa1|35340  
AT2G31190Phypa1|36852  
AT1G66030,AT5G51900  
Phypa1|2606  
AT1G34540,AT3G56630,AT3G01900,AT5G63450,AT3G48520,AT2G27690  
Phypa1|37918,Phypa1|36635,Phypa1|9568  
Phypa1|19929,Phypa1|29873  
AT1G24540,AT1G13140,AT1G13150,AT3G26125,AT5G08250,AT5G23190  
Phypa1|27499  
AT5G02900,AT4G39510,AT4G32170,AT4G39500,AT1G47620,AT2G23180,AT4G39480,AT4G39490,AT2G21910,AT5  
G52320,AT1G65340,AT1G57750  
AT2G45510,AT2G44890  
AT1G69500 Phypa1|26739,Phypa1|36741  
AT1G63710,AT1G01600,AT4G00360,AT2G45970,AT5G58860 Phypa1|36443,Phypa1|30121  
AT3G01460 Phypa1|34624  
AT5G21160Phypa1|38535,Phypa1|34027  
AT1G53200 Phypa1|33583  
AT5G44860,AT4G19950,AT1G31130 Phypa1|38929,Phypa1|37792,Phypa1|23814,Phypa1|29414  
AT4G35730  
Phypa1|25570  
AT4G29440,AT2G19710  
AT1G13340,AT2G14830,AT1G51900,AT3G15490 Phypa1|27358  
AT1G34220 Phypa1|27016  
AT1G25420  
AT1G55900 Phypa1|28825,Phypa1|28081  
AT3G09210 Phypa1|33699  
AT5G47730,AT1G55840 Phypa1|26675,Phypa1|29964,Phypa1|566  
Phypa1|30737  
Phypa1|30480  
AT1G12050 Phypa1|37307,Phypa1|28193  
AT4G31360,AT2G24440 Phypa1|29513,Phypa1|35186  
AT2G43190 Phypa1|30076  
AT4G11160Phypa1|38789  
AT1G17220 Phypa1|36628  
Phypa1|31134  
Phypa1|22649  
Phypa1|10847  
Phypa1|29234  
AT4G39910,AT2G22310 Phypa1|26881,Phypa1|38762,Phypa1|31607  
Phypa1|25654  
Phypa1|29889,Phypa1|1556  
Phypa1|25939  
Phypa1|30089  
Phypa1|1124  
Phypa1|1221  
AT1G26220 Phypa1|7051  
AT1G32070 Phypa1|30120  
AT2G26780 Phypa1|36179  
Phypa1|35465  
AT1G02590 Phypa1|13225  
Phypa1|23886,Phypa1|28597  
AT2G27150,AT1G04580,AT5G20960,AT3G43600  
AT4G34890,AT4G34900 Phypa1|32723  
AT4G37500,AT3G04390  
Phypa1|23191  
Phypa1|19402  
AT3G52050 Phypa1|19432,Phypa1|20634,Phypa1|1888  
AT1G64355 Phypa1|2149  
AT3G26115Phypa1|34389,Phypa1|27480  
AT1G59600 Phypa1|27969  
AT1G04560,AT1G29520,AT5G46530,AT5G18970  
Phypa1|35232,Phypa1|35935,Phypa1|30313,Phypa1|37865,Phypa1|27173,Phypa1|37135,Phypa1|31770,  
Phypa1|23701,Phypa1|33708,Phypa1|11431,Phypa1|21104  
AT3G43840,AT2G16530,AT1G72590 Phypa1|25582  
Phypa1|25321  
Phypa1|33341,Phypa1|35712  
AT5G12320  
Phypa1|1649  
AT2G17390,AT4G35450  
Phypa1|24761  
Phypa1|175,Phypa1|24124  
Phypa1|2309,Phypa1|30154  
AT5G18410 Phypa1|24721,Phypa1|35780  
AT5G03455 Phypa1|25298  
Phypa1|24268,Phypa1|24367,Phypa1|20314  
AT1G23740 Phypa1|30557

Phypa1|11206,Phypa1|37169,Phypa1|39508  
Phypa1|26184  
Phypa1|23534,Phypa1|19382  
AT3G15090 Phypa1|35032  
AT4G13010 Phypa1|3004,Phypa1|26150  
Phypa1|12672  
Phypa1|30676  
Phypa1|4000,Phypa1|15357  
AT1G43690 Phypa1|2534,Phypa1|36421  
AT3G46210,AT2G07110 Phypa1|37532  
Phypa1|22227  
AT5G44800  
AT5G07810 Phypa1|27174  
Phypa1|921  
AT3G12810 Phypa1|26408,Phypa1|1349  
AT3G54280 Phypa1|36794  
Phypa1|17644,Phypa1|35472  
Phypa1|29170  
AT5G63950 Phypa1|10850,Phypa1|6943  
Phypa1|4260  
Phypa1|3233  
AT2G13370  
AT5G19310,AT3G06010 Phypa1|1756  
AT3G57300 Phypa1|29863,Phypa1|32744  
AT2G18760 Phypa1|9602  
Phypa1|1761  
AT2G46020 Phypa1|14640,Phypa1|32176  
Phypa1|15232  
Phypa1|35562  
Phypa1|26202,Phypa1|14820  
Phypa1|23985,Phypa1|14146  
AT2G44980 Phypa1|24061  
Phypa1|20890  
Phypa1|18796,Phypa1|34295  
AT3G19210 Phypa1|30189,Phypa1|29297  
Phypa1|21376  
Phypa1|7652  
AT1G03750  
AT2G25170,AT4G31900 Phypa1|25704,Phypa1|29282  
AT5G66750 Phypa1|38690  
Phypa1|5951  
AT3G06400,AT5G18620 Phypa1|39094,Phypa1|39042  
AT2G02090 Phypa1|29509,Phypa1|29689,Phypa1|29474  
Phypa1|27328,Phypa1|2  
AT1G08600 Phypa1|893  
AT1G48310  
AT3G28760 Phypa1|38863,Phypa1|36965,Phypa1|37686,Phypa1|31003,Phypa1|29713,Phypa1|29380  
AT2G14870,AT5G12190 Phypa1|38676  
AT1G71950 Phypa1|33896  
AT2G03600,AT2G03590,AT2G03530,AT2G03520,AT1G26440 Phypa1|16639,Phypa1|28296,Phypa1|7607  
AT5G51610,AT1G32990  
AT4G35490 Phypa1|39727  
Phypa1|31127  
Phypa1|26170,Phypa1|28188,Phypa1|28958  
AT1G64330,AT5G41790,AT1G64320,AT5G41780 Phypa1|34039  
Phypa1|18337  
AT5G11700,AT4G32920,AT5G47020  
Phypa1|29262,Phypa1|26127,Phypa1|29504,Phypa1|29138,Phypa1|37414  
AT1G77760,AT1G37130 Phypa1|26472,Phypa1|38645,Phypa1|36835,Phypa1|29855  
AT5G15260,AT3G01170 Phypa1|26121  
AT5G49120,AT1G53885,AT1G22160,AT1G78020,AT4G39795,AT5G65040,AT4G17670,AT5G47060,AT2G44670  
Phypa1|35657,Phypa1|356  
AT5G22950,AT3G45000 Phypa1|27562,Phypa1|38861,Phypa1|37038  
AT1G75170,AT4G36640 Phypa1|24208,Phypa1|38615,Phypa1|37676,Phypa1|1488  
AT4G08690,AT1G22180  
Phypa1|25718  
AT1G14820  
AT1G01630 Phypa1|26048,Phypa1|25617,Phypa1|26846,Phypa1|29054  
AT5G63060 Phypa1|24546  
AT3G07140 Phypa1|38084  
Phypa1|35696  
AT5G53470,AT4G27780 Phypa1|30096,Phypa1|27046,Phypa1|25323  
Phypa1|32609  
AT5G43300,AT3G02040,AT5G41080 Phypa1|171,Phypa1|26785,Phypa1|29764,Phypa1|27611  
AT3G58140 Phypa1|28576  
AT2G24610,AT4G30360,AT3G48010,AT5G14870  
AT4G30560,AT2G23980,AT5G57940,AT1G15990,AT1G19780,AT5G53130,AT4G01010,AT1G01340,AT2G46450,AT2G46440,AT2G46430 Phypa1|37501,Phypa1|9728,Phypa1|26,Phypa1|25872  
Phypa1|4044  
Phypa1|15851  
Phypa1|27516  
AT3G17690,AT3G17700 Phypa1|1766

Phypa1|28290  
AT5G15410,AT5G54250 Phypa1|451,Phypa1|27440  
AT2G28260  
AT5G05490 Phypa1|19934  
AT3G23430,AT1G68740,AT3G29060,AT1G69480,AT2G03240,AT1G14040,AT2G03250,AT2G03260,AT1G26730,AT1  
G35350,AT4G25350 Phypa1|34998  
AT1G29060,AT4G14600 Phypa1|38851  
AT4G00830,AT5G28390,AT3G52660 Phypa1|480,Phypa1|39151  
AT4G11080,AT4G23800 Phypa1|2496,Phypa1|38665  
AT2G34770,AT4G20870  
Phypa1|9825,Phypa1|26643,Phypa1|26435,Phypa1|25414,Phypa1|4749,Phypa1|38975  
AT3G08920 Phypa1|39432  
AT4G24750 Phypa1|28355,Phypa1|36087  
Phypa1|30585  
AT5G48840 Phypa1|36122  
AT4G04640,AT1G15700 Phypa1|25783,Phypa1|29757,Phypa1|30317  
Phypa1|31046  
Phypa1|32037  
Phypa1|17692,Phypa1|4309  
Phypa1|33030  
AT5G60030 Phypa1|31898  
AT5G45520  
AT1G56660,AT3G28770  
AT5G19940 Phypa1|28069  
AT3G22480 Phypa1|5299,Phypa1|2520  
AT1G68310,AT3G09380 Phypa1|27184  
AT2G39220,AT3G54950,AT4G29800,AT3G63200 Phypa1|26626,Phypa1|25047  
AT1G77800 Phypa1|6130,Phypa1|1193  
AT2G04520,AT5G35680 Phypa1|29934,Phypa1|39577,Phypa1|3914,Phypa1|31594  
AT3G11540Phypa1|30213,Phypa1|38124  
AT4G28020 Phypa1|37937  
Phypa1|14735  
AT4G24820 Phypa1|38640,Phypa1|36753  
AT3G06350 Phypa1|2435  
Phypa1|381  
AT1G08290,AT1G13290,AT1G34790,AT1G51220,AT3G20880,AT3G57670 Phypa1|28946  
Phypa1|1543  
AT2G26810 Phypa1|24306  
AT3G25660 Phypa1|39296,Phypa1|26397,Phypa1|1347,Phypa1|30454  
AT5G57710,AT4G30350 Phypa1|6542  
AT5G55960 Phypa1|1376,Phypa1|37958,Phypa1|6342,Phypa1|448  
AT2G27490 Phypa1|36280  
Phypa1|31390  
AT3G03890 Phypa1|24283  
AT3G10940 Phypa1|32332  
AT3G52180 Phypa1|31857,Phypa1|34083  
AT2G45990 Phypa1|2441,Phypa1|32593,Phypa1|28129  
Phypa1|28288  
Phypa1|27473,Phypa1|19813  
AT4G25000 Phypa1|24942,Phypa1|2938  
AT1G76130 Phypa1|30990,Phypa1|24741  
AT1G69830  
AT5G23810,AT5G63850,AT5G09220,AT1G77380,AT1G44100,AT1G10010,AT1G58360,AT5G49630  
Phypa1|2786,Phypa1|30391  
AT4G19003 Phypa1|37621  
AT3G58750,AT3G58740,AT2G42790 Phypa1|33008,Phypa1|24826,Phypa1|22026,Phypa1|30500  
AT5G38880 Phypa1|25398,Phypa1|25378,Phypa1|28788,Phypa1|36620  
AT5G63890 Phypa1|31913,Phypa1|29271  
Phypa1|31429  
Phypa1|31314  
AT2G30890 Phypa1|10832,Phypa1|2156  
AT3G02980,AT5G16800 Phypa1|36890,Phypa1|1131  
AT4G14420,AT1G04340,AT5G43460,AT3G23180,AT3G23190,AT3G23175  
Phypa1|11656,Phypa1|38728,Phypa1|39288  
AT3G05520 Phypa1|37736,Phypa1|2590  
Phypa1|31266  
AT2G18710 Phypa1|36107  
AT4G31200 Phypa1|1784  
AT3G11760,AT2G10560,AT5G04860,AT2G25460 Phypa1|26300,Phypa1|28319  
AT3G15550  
Phypa1|28078,Phypa1|28333,Phypa1|26244,Phypa1|29864,Phypa1|29515,Phypa1|27727,Phypa1|27070  
Phypa1|35318  
AT3G15560 Phypa1|18038  
AT2G25430,AT4G32285,AT1G05020,AT1G03050,AT4G02650 Phypa1|36871,Phypa1|29839,Phypa1|23677  
AT3G56900 Phypa1|33417  
AT5G45360 Phypa1|27241  
AT3G20720 Phypa1|10779,Phypa1|29387  
AT5G10690 Phypa1|36359  
Phypa1|31052  
AT1G79010,AT1G16700 Phypa1|25372,Phypa1|33462  
AT1G19800 Phypa1|26611  
AT2G43210 Phypa1|34156

AT4G01245,AT4G01270 Phypa1|21059  
AT5G19300 Phypa1|998  
AT5G17070 Phypa1|31693  
AT5G47830 Phypa1|772,Phypa1|773,Phypa1|36532  
AT3G06510 Phypa1|25439,Phypa1|25883  
AT2G16460,AT3G51090 Phypa1|27107,Phypa1|38468,Phypa1|39552,Phypa1|2056  
AT3G48460  
Phypa1|10865  
Phypa1|4733,Phypa1|29186,Phypa1|30983  
Phypa1|35421  
AT4G01130Phypa1|25602  
AT1G28570,AT1G28580,AT1G28610,AT2G27360,AT1G28590,AT1G28600,AT1G31550,AT1G28660,AT1G28670,AT1  
G28640,AT1G28650,AT5G45910,AT5G03980  
AT5G14450,AT3G27950,AT3G26430,AT1G67830,AT1G54790,AT3G05180,AT1G09390,AT1G56670,AT3G62280  
Phypa1|25456  
Phypa1|1023,Phypa1|39791,Phypa1|16989,Phypa1|4097,Phypa1|27851  
AT4G16450 Phypa1|37122  
AT5G57655 Phypa1|37483  
AT1G49670 Phypa1|18837,Phypa1|33816,Phypa1|34017  
AT3G01210,AT1G14340,AT5G32450,AT5G46870,AT4G17720,AT5G16840,AT1G67950  
Phypa1|1972,Phypa1|1078,Phypa1|38288,Phypa1|2013,Phypa1|38917  
AT3G29130 Phypa1|26638  
AT4G35070,AT5G47050,AT4G17680,AT1G32740,AT1G10650,AT1G60610,AT1G45976  
Phypa1|1477,Phypa1|34331,Phypa1|24472,Phypa1|39061,Phypa1|38176  
AT4G18460 Phypa1|24728  
AT1G74700,AT2G04530 Phypa1|31950,Phypa1|30828  
AT1G52510 Phypa1|36237  
Phypa1|6336  
AT1G27160,AT1G14610 Phypa1|36880  
Phypa1|3074  
AT5G16715 Phypa1|26800  
AT2G31010,AT2G42640,AT3G58640 Phypa1|4493,Phypa1|36799,Phypa1|26617  
AT1G53000 Phypa1|1530,Phypa1|30654  
AT1G01710,AT4G00520,AT4G00510 Phypa1|33234,Phypa1|28376,Phypa1|33412  
AT5G64240  
AT4G17080,AT2G35170  
AT1G77660,AT1G21920  
Phypa1|27492  
AT1G02170,AT4G25110 Phypa1|26657  
Phypa1|25134  
AT5G58560 Phypa1|1970,Phypa1|26654  
AT5G04490 Phypa1|637  
AT5G58670,AT4G38530,AT3G55940,AT3G08510,AT5G58690,AT2G40116,AT3G47220,AT3G47290,AT5G58700  
Phypa1|27508,Phypa1|39083,Phypa1|1381,Phypa1|30714,Phypa1|38235,Phypa1|39330,Phypa1|27197  
AT1G49850  
AT1G68180  
AT1G18760,AT1G18770,AT3G13228,AT1G18780,AT2G29840,AT1G21960,AT5G53910  
Phypa1|24893  
AT5G15820,AT3G02340,AT3G30460  
AT1G50350 Phypa1|862  
AT5G59550,AT3G46620,AT2G39720  
AT3G19950 Phypa1|814,Phypa1|34822,Phypa1|1264  
AT5G01980  
AT2G03000  
AT5G60820,AT5G08139  
AT5G20910 Phypa1|29803,Phypa1|24710  
AT5G64920  
AT5G56340,AT4G26400,AT3G13430,AT1G55530,AT1G26800,AT1G14200  
Phypa1|1729  
AT2G15580  
Phypa1|1263  
AT3G58720  
Phypa1|887  
AT4G18110,AT5G54990,AT1G74620  
AT2G44330,AT3G60080  
AT1G60360,AT3G56580,AT2G40830,AT3G10815  
AT5G24490 Phypa1|39271,Phypa1|25684  
AT3G10572 Phypa1|34613  
AT1G04940 Phypa1|10564  
AT5G52190 Phypa1|29938,Phypa1|26350  
AT3G56830,AT1G65420 Phypa1|2097  
AT1G27510 Phypa1|36725,Phypa1|25761,Phypa1|26388,Phypa1|28236  
Phypa1|36577  
AT4G33630  
AT2G38670 Phypa1|25822,Phypa1|29674  
AT5G11960Phypa1|27997  
AT5G25150 Phypa1|39014  
AT1G09020 Phypa1|16486,Phypa1|927  
AT5G58005 Phypa1|29281,Phypa1|25687,Phypa1|18226  
AT1G06550 Phypa1|37153  
AT3G60510,AT4G31810 Phypa1|38044,Phypa1|27091,Phypa1|38237  
AT2G30660,AT5G65940,AT2G30650

AT3G24360,AT4G13360 Phypa1|33299,Phypa1|35973  
AT3G62910 Phypa1|28009  
AT2G47020 Phypa1|18492  
AT1G78810 Phypa1|35446  
AT3G58020,AT2G18465 Phypa1|33563  
AT2G44100,AT3G59920,AT5G09550 Phypa1|39215,Phypa1|24176,Phypa1|24134,Phypa1|38913  
AT1G02065 Phypa1|19740,Phypa1|12768,Phypa1|16021,Phypa1|17851,Phypa1|5816,Phypa1|8412  
AT5G50570,AT5G50670 Phypa1|8410,Phypa1|34543,Phypa1|34542,Phypa1|1338  
AT3G57920,AT2G42200,AT2G33810  
AT1G27370,AT1G27360,AT5G43270,AT1G69170  
AT3G09970,AT3G09960 Phypa1|18256,Phypa1|27813  
AT5G14780 Phypa1|30779,Phypa1|38940  
AT5G16660,AT3G02900 Phypa1|34842  
AT1G42960 Phypa1|35300  
AT1G30970 Phypa1|14832,Phypa1|3076  
AT5G58370 Phypa1|29618  
AT1G51390,AT3G20970 Phypa1|24077,Phypa1|30140  
AT3G46910,AT4G12100  
AT1G02980  
Phypa1|37473,Phypa1|23965,Phypa1|34094  
AT1G69670,AT1G26830 Phypa1|23757,Phypa1|29908  
AT4G02570  
AT5G46210 Phypa1|26796,Phypa1|37590,Phypa1|23943  
Phypa1|11466  
Phypa1|13997  
AT1G59800,AT1G59790  
AT2G03510 Phypa1|3150,Phypa1|25925  
AT5G27280 Phypa1|32664  
Phypa1|17155  
AT1G68730  
AT2G22690,AT4G37880,AT5G09630  
Phypa1|38250,Phypa1|38677,Phypa1|23799,Phypa1|21508,Phypa1|7743  
AT1G48430,AT3G17770 Phypa1|26704,Phypa1|37831,Phypa1|2653  
AT4G31040 Phypa1|34075,Phypa1|1857  
AT2G30942 Phypa1|37294,Phypa1|27663  
AT3G16400,AT3G16410,AT3G16390,AT2G33070,AT1G54040,AT5G48180,AT3G07720 Phypa1|34830  
AT5G43680 Phypa1|33273  
AT3G06310,AT5G18800 Phypa1|37569,Phypa1|19729,Phypa1|35620  
AT5G14420,AT3G01650,AT1G67800,AT5G63970,AT1G79380  
Phypa1|38074,Phypa1|30631,Phypa1|36282,Phypa1|1864  
AT1G47750 Phypa1|10855  
AT4G16210 Phypa1|29022,Phypa1|36674  
AT3G52910 Phypa1|24043  
AT2G38780 Phypa1|24260  
AT1G71410,AT1G22870 Phypa1|23999  
AT3G58970,AT4G28580 Phypa1|30652,Phypa1|36602,Phypa1|24338,Phypa1|12228  
AT5G64560,AT5G09690,AT5G09710,AT5G09720 Phypa1|26939  
Phypa1|35903  
Phypa1|13613  
Phypa1|28263  
AT3G19640  
AT1G16010,AT1G80900 Phypa1|21699,Phypa1|39709  
AT2G03620  
AT5G20720 Phypa1|24919,Phypa1|36050,Phypa1|39783,Phypa1|29827  
AT1G16225,AT1G16230,AT1G79590,AT1G16240 Phypa1|37709,Phypa1|24373  
AT5G08230,AT5G23150,AT2G48160,AT3G63070 Phypa1|31752  
AT1G48440,AT3G17780 Phypa1|3455,Phypa1|34619  
AT3G03160,AT5G17190 Phypa1|31494,Phypa1|38559  
AT3G22990 Phypa1|38865,Phypa1|23995  
AT2G38450,AT5G05360 Phypa1|17357  
AT1G02910 Phypa1|9802,Phypa1|33272  
Phypa1|14994  
AT3G07610  
Phypa1|35660  
AT1G09060  
AT1G11950,AT1G62310  
Phypa1|25478,Phypa1|30703,Phypa1|34081,Phypa1|38109  
AT4G00990  
AT4G21430  
AT1G73960 Phypa1|15015,Phypa1|28757  
AT3G63520 Phypa1|24082,Phypa1|13465,Phypa1|33862,Phypa1|31800  
AT4G19170  
AT3G14440,AT1G78390,AT4G18350,AT1G30100,AT3G24220 Phypa1|2719,Phypa1|35714  
AT3G11960Phypa1|37019  
AT4G01310 Phypa1|25283,Phypa1|30268,Phypa1|31268  
AT5G04800,AT2G05220,AT2G04390,AT3G10610  
Phypa1|24455,Phypa1|7434,Phypa1|31534,Phypa1|38518,Phypa1|1646,Phypa1|25442  
AT5G65290 Phypa1|2942,Phypa1|24880,Phypa1|32980  
AT5G57370 Phypa1|33525  
AT1G05490 Phypa1|31812,Phypa1|32542  
Phypa1|5051  
Phypa1|31764



Phypa1|16365  
 Phypa1|5091  
 AT1G55760,AT1G21780 Phypa1|17501,Phypa1|9467,Phypa1|4277,Phypa1|27120  
 AT5G02280 Phypa1|36923,Phypa1|24017  
 AT3G03120,AT5G17060 Phypa1|36502,Phypa1|38501,Phypa1|36938  
 AT2G24765 Phypa1|24051,Phypa1|2713  
 AT5G67560,AT3G49870 Phypa1|24044,Phypa1|37031,Phypa1|24666  
 Phypa1|31554,Phypa1|32375,Phypa1|38393  
 Phypa1|20004  
 AT5G52210 Phypa1|6868,Phypa1|29652  
 Phypa1|36750,Phypa1|38734,Phypa1|38711,Phypa1|23992,Phypa1|33304,Phypa1|37581,Phypa1|37582  
 AT2G18390 Phypa1|36671  
 Phypa1|2332  
 Phypa1|39583  
 AT3G22950 Phypa1|23674,Phypa1|24295  
 AT3G49860  
 Phypa1|26974  
 Phypa1|2514,Phypa1|39206,Phypa1|2598  
 Phypa1|18736  
 AT1G02430,AT1G02440  
 AT3G62290,AT2G47170,AT1G70490,AT1G23490,AT1G10630,AT5G14670  
 AT5G37680  
 AT2G15310  
 AT1G49260,AT5G19520,AT5G12080 Phypa1|13872  
 AT1G78610,AT3G14810,AT1G53470,AT2G17010,AT2G17000 Phypa1|38520,Phypa1|24390,Phypa1|39114  
 Phypa1|24684,Phypa1|26382  
 Phypa1|31975,Phypa1|34840  
 AT4G17140  
 AT4G17110,AT4G17130  
 AT1G48090 Phypa1|19254  
 Phypa1|16277  
 AT4G17120  
 AT1G54690,AT1G08880 Phypa1|2910,Phypa1|36584,Phypa1|295  
 Phypa1|29121,Phypa1|36478,Phypa1|39659  
 Phypa1|28248,Phypa1|32807  
 AT3G54560,AT2G38810  
 AT5G02560,AT5G27670,AT5G59870 Phypa1|23857,Phypa1|27784  
 AT5G54640,AT3G20670,AT1G51060,AT4G27230  
 Phypa1|30829  
 AT1G52740  
 AT4G13570  
 Phypa1|8135  
 AT3G54860 Phypa1|23744  
 AT2G16960,AT2G16950 Phypa1|39506,Phypa1|36110,Phypa1|38252,Phypa1|32647  
 AT2G30695 Phypa1|25760  
 AT1G02330 Phypa1|26007,Phypa1|38251  
 Phypa1|409  
 AT5G63420  
 Phypa1|29994,Phypa1|31362,Phypa1|22752,Phypa1|21901,Phypa1|22548  
 AT1G49040 Phypa1|3989  
 AT4G01320 Phypa1|35592,Phypa1|39529  
 AT5G20950,AT5G20940  
 Phypa1|32732  
 AT3G62710  
 AT5G04885  
 AT3G47040,AT3G47000,AT3G47010,AT3G47050 Phypa1|39795,Phypa1|32847,Phypa1|2999,Phypa1|37652  
 Phypa1|23656  
 AT1G23180 Phypa1|36323  
 AT5G50110Phypa1|3032  
 AT4G02790 Phypa1|31146,Phypa1|564  
 AT1G22630 Phypa1|34376  
 AT2G20835,AT1G52855 Phypa1|27861,Phypa1|24347  
 AT1G31280,AT1G31290  
 AT1G48410 Phypa1|38398,Phypa1|31631,Phypa1|28638  
 AT1G69440 Phypa1|2128  
 AT2G32940,AT2G27040,AT5G21030,AT5G21150  
 Phypa1|25235,Phypa1|38113,Phypa1|27652,Phypa1|16535  
 AT2G27880  
 AT5G43810  
 Phypa1|4124  
 AT5G40960,AT5G40970,AT3G27030,AT3G01950,AT5G14110,AT5G50660,AT5G50560,AT5G63500,AT3G48660,AT5  
 G40980,AT3G01940 Phypa1|2239,Phypa1|3569,Phypa1|36462  
 AT4G29960 Phypa1|19030,Phypa1|32156  
 AT3G46450 Phypa1|32288,Phypa1|25753,Phypa1|35777  
 AT5G41950 Phypa1|13114,Phypa1|29246  
 AT3G08955,AT3G08960 Phypa1|27922,Phypa1|30279  
 AT5G25580,AT1G18950 Phypa1|25319,Phypa1|25331,Phypa1|25904  
 AT5G66130 Phypa1|28745  
 AT3G15520 Phypa1|28951,Phypa1|25855  
 AT2G32150,AT3G62040,AT5G59480,AT5G59490,AT5G02230 Phypa1|28511  
 AT1G50940 Phypa1|16454,Phypa1|37594  
 Phypa1|30866,Phypa1|30478

Phypa1|22004  
 AT5G14800 Phypa1|28258  
 Phypa1|31207  
 AT3G25680,AT5G23890,AT5G52410  
 Phypa1|11670,Phypa1|37972,Phypa1|29142,Phypa1|35732,Phypa1|476  
 AT3G51160,AT5G66280 Phypa1|28677,Phypa1|2474,Phypa1|27566,Phypa1|39730  
 Phypa1|6129,Phypa1|30878  
 Phypa1|30735  
 Phypa1|21639  
 AT3G55820 Phypa1|16383  
 AT3G61800 Phypa1|32994  
 AT5G13070 Phypa1|38391,Phypa1|18293  
 AT2G13440 Phypa1|24556  
 AT2G40730 Phypa1|36492  
 AT2G27700,AT1G21160,AT1G76720,AT1G76825,AT1G76810  
 Phypa1|4052  
 Phypa1|29398  
 AT1G76820  
 AT2G01080 Phypa1|16935,Phypa1|33196  
 AT5G65840 Phypa1|30649  
 AT1G80190 Phypa1|7890,Phypa1|32730  
 AT1G68660 Phypa1|1208,Phypa1|1209  
 AT4G36480 Phypa1|37928  
 AT2G46210,AT3G61580 Phypa1|38930,Phypa1|33177,Phypa1|34900  
 Phypa1|17195,Phypa1|17178  
 AT4G25940,AT5G57200,AT1G14910,AT2G01600 Phypa1|922,Phypa1|35488  
 AT1G33340  
 AT4G40080 Phypa1|33483,Phypa1|32452  
 AT5G35200  
 AT1G68220,AT1G13380,AT1G61065,AT4G27435,AT3G15480,AT1G52910  
 Phypa1|39142,Phypa1|28417,Phypa1|24146,Phypa1|32603,Phypa1|28473,Phypa1|37653,Phypa1|32970,  
 Phypa1|13168,Phypa1|1657  
 AT3G26950 Phypa1|38401,Phypa1|28049  
 AT5G24450,AT3G49410 Phypa1|27952  
 AT4G22000 Phypa1|39538  
 AT5G38520 Phypa1|36925  
 AT1G03110Phypa1|26886  
 AT1G56180 Phypa1|26380  
 AT5G56360 Phypa1|11300  
 AT2G42390 Phypa1|31780  
 AT3G55800 Phypa1|26015,Phypa1|38107,Phypa1|8625  
 AT4G14100,AT3G23760 Phypa1|36941  
 AT5G66930 Phypa1|29256  
 AT3G25470 Phypa1|31161  
 Phypa1|25188  
 AT4G38810 Phypa1|29109  
 AT3G56210 Phypa1|7015  
 AT3G04870 Phypa1|2977,Phypa1|37620,Phypa1|28314  
 AT3G10970 Phypa1|25522  
 Phypa1|31013,Phypa1|31321  
 Phypa1|21355  
 Phypa1|3106  
 AT4G35460,AT2G17420 Phypa1|31682,Phypa1|24746  
 AT2G41680 Phypa1|31692,Phypa1|35803  
 AT3G11220Phypa1|17470  
 AT3G58050,AT2G41960 Phypa1|26339,Phypa1|28879  
 AT2G42210 Phypa1|29978,Phypa1|25346  
 AT2G15230 Phypa1|27708,Phypa1|25798,Phypa1|5372  
 Phypa1|29991  
 AT5G14180 Phypa1|17218,Phypa1|29150  
 AT1G72990 Phypa1|38611,Phypa1|28293  
 Phypa1|24220,Phypa1|29049,Phypa1|26671,Phypa1|37729  
 AT5G47550,AT4G16500,AT5G12140,AT3G12490,AT5G05110,AT2G40880 Phypa1|28206  
 AT5G16280 Phypa1|29600  
 Phypa1|31231  
 AT5G18170,AT3G03910,AT5G07440 Phypa1|26585  
 Phypa1|28954,Phypa1|37306,Phypa1|28201  
 Phypa1|282,Phypa1|30723,Phypa1|31189,Phypa1|26094  
 AT4G04610,AT4G21990,AT1G62180 Phypa1|24161  
 AT3G21820 Phypa1|25878  
 AT5G20140 Phypa1|28447  
 Phypa1|28108  
 Phypa1|30528  
 AT3G59140 Phypa1|39544,Phypa1|25281,Phypa1|3084  
 AT3G60970,AT3G60160,AT3G13080,AT3G13090,AT3G13100  
 AT2G07680 Phypa1|27854  
 Phypa1|39382,Phypa1|19816,Phypa1|21854  
 Phypa1|37049  
 AT1G71330  
 AT1G30410,AT1G30420,AT2G34660,AT1G30400 Phypa1|29209,Phypa1|38010,Phypa1|37685  
 AT2G47800,AT3G62700 Phypa1|39035  
 Phypa1|3754

AT1G04120 Phypa1|34052  
AT3G21250  
AT5G66040,AT4G35770,AT2G17850,AT2G21045,AT5G66170 Phypa1|24335,Phypa1|36853  
AT4G14145 Phypa1|34776  
AT3G46030,AT3G45980,AT5G59910,AT1G07790,AT5G22880,AT2G28720,AT3G53650,AT2G37470,AT3G09480,AT5  
G02570,AT1G08170  
Phypa1|2811,Phypa1|38910,Phypa1|11672,Phypa1|32451,Phypa1|38909,Phypa1|38635,Phypa1|38498,P  
hypa1|2967,Phypa1|2922  
AT3G53830,AT3G55580 Phypa1|24836,Phypa1|2622,Phypa1|39100,Phypa1|16094  
AT1G25260 Phypa1|39717,Phypa1|39105  
AT4G38690,AT4G34920,AT4G34930 Phypa1|35506,Phypa1|39178,Phypa1|32923  
AT1G64460,AT1G64470,AT5G24240,AT2G46500,AT3G43950 Phypa1|29404,Phypa1|38796  
AT1G80780,AT2G32070,AT5G10960,AT1G27890,AT1G27820,AT1G61470,AT3G44240,AT1G06450,AT3G44260,AT5  
G22250,AT1G15920 Phypa1|38286,Phypa1|36892  
AT1G47720 Phypa1|34692,Phypa1|34516  
AT5G27710 Phypa1|37843  
AT1G74140,AT1G74130,AT1G18600 Phypa1|2346  
AT5G20180 Phypa1|27085  
AT5G55250,AT5G66430,AT5G04370,AT5G04380,AT3G11480,AT3G21950,AT5G38020,AT2G14060,AT1G19640,AT4  
G36470,AT5G56300 Phypa1|30103,Phypa1|28955  
AT5G26140,AT5G11950  
Phypa1|36504,Phypa1|29163,Phypa1|27786,Phypa1|32966,Phypa1|24953,Phypa1|27304,Phypa1|17030,  
Phypa1|27793,Phypa1|19099  
AT5G06300,AT3G53450,AT2G37210,AT2G28305,AT4G35190,AT2G35990,AT5G03270  
Phypa1|1568  
AT5G38140,AT5G27910,AT5G50490,AT5G50470,AT5G50480  
AT1G56170 Phypa1|316,Phypa1|26270  
Phypa1|300  
AT1G54830,AT1G08970 Phypa1|2366  
AT5G63470,AT3G48590 Phypa1|834,Phypa1|29955  
AT5G27610,AT3G05380  
AT3G21440  
Phypa1|13669  
AT3G21430 Phypa1|32344  
AT3G25760,AT3G25770,AT3G25780,AT1G13280 Phypa1|31500,Phypa1|39665  
Phypa1|37240,Phypa1|29555,Phypa1|26036  
AT3G05590,AT5G27850,AT2G47570  
Phypa1|31531,Phypa1|32746,Phypa1|37902,Phypa1|38561,Phypa1|38152  
AT1G11720  
Phypa1|17768  
Phypa1|38471  
Phypa1|29840,Phypa1|19031,Phypa1|12039,Phypa1|12041  
AT5G65685  
AT4G18240 Phypa1|25305,Phypa1|24375,Phypa1|25896  
AT5G24680 Phypa1|34710,Phypa1|28821,Phypa1|37711,Phypa1|535,Phypa1|1889  
AT1G54860,AT5G19240,AT5G19230,AT5G19250,AT3G06035 Phypa1|261  
Phypa1|22108,Phypa1|22974,Phypa1|31255  
AT5G41360,AT5G41370 Phypa1|34404  
AT1G08570,AT2G33270,AT5G61440 Phypa1|271  
Phypa1|2095,Phypa1|2096  
AT4G26160,AT4G29670  
AT5G61820 Phypa1|35763,Phypa1|29441,Phypa1|28725  
AT4G29000,AT2G20110,AT3G16160,AT5G25790 Phypa1|34950,Phypa1|24807  
AT4G28830 Phypa1|39238  
AT1G24706 Phypa1|27018  
AT1G60070,AT1G23940,AT1G23900 Phypa1|28301,Phypa1|32201,Phypa1|23994,Phypa1|2742  
AT1G31730 Phypa1|26786,Phypa1|38567  
AT1G19750,AT1G27840 Phypa1|24900  
AT3G52090 Phypa1|25843,Phypa1|35971  
AT5G61970 Phypa1|37829  
AT2G36740 Phypa1|32823  
AT4G21150Phypa1|204  
AT1G07230 Phypa1|38887,Phypa1|29715,Phypa1|36471,Phypa1|29221  
AT2G26870,AT3G48610  
AT3G03540,AT3G03530,AT3G03520  
Phypa1|29159  
AT1G08020,AT1G08030 Phypa1|3872  
AT3G16350,AT5G47390  
Phypa1|34496,Phypa1|9869,Phypa1|9590,Phypa1|9588,Phypa1|657,Phypa1|27256  
Phypa1|35349  
Phypa1|20164  
Phypa1|33508  
Phypa1|14598  
AT5G62750 Phypa1|32651  
AT3G25800,AT1G13320,AT1G25490 Phypa1|34581,Phypa1|37637,Phypa1|39012,Phypa1|10002  
AT4G27070,AT5G54810 Phypa1|25504,Phypa1|36241,Phypa1|24486,Phypa1|4609  
AT5G28237  
Phypa1|22473  
AT5G35840,AT1G09570,AT4G16250,AT2G18790,AT4G18130  
Phypa1|39406,Phypa1|36854,Phypa1|24962,Phypa1|33584,Phypa1|38575,Phypa1|39208,Phypa1|39595,  
Phypa1|3904  
AT4G08240 Phypa1|34454

AT5G57330  
 AT5G14500,AT3G01590 Phypa1|23735,Phypa1|24241  
 AT4G25900  
 AT3G61610,AT4G23730  
 AT5G66530 Phypa1|38341,Phypa1|30789  
 Phypa1|27901  
 AT2G03680,AT1G69230,AT3G02180,AT5G15600  
 AT4G23496 Phypa1|6913,Phypa1|23767,Phypa1|23704  
 Phypa1|23370,Phypa1|22306  
 AT1G09300 Phypa1|27306  
 AT5G66860,AT4G23620 Phypa1|2038  
 AT1G70760 Phypa1|33706  
 AT3G07980,AT3G13530 Phypa1|13434,Phypa1|26668  
 AT4G08480  
 AT2G18530  
 Phypa1|1060,Phypa1|576  
 Phypa1|27453  
 AT2G18770,AT5G05670 Phypa1|28926  
 AT2G32040,AT5G54860 Phypa1|1402,Phypa1|28482,Phypa1|34973  
 AT3G60245,AT3G10950  
 Phypa1|2535,Phypa1|2419,Phypa1|36404,Phypa1|37577,Phypa1|38781,Phypa1|24277,Phypa1|29252  
 AT4G32820 Phypa1|28462  
 AT3G24740,AT4G31410,AT1G68140,AT4G08460,AT1G77770,AT3G25910,AT2G26050,AT1G80220,AT5G38370,AT1G15430 Phypa1|26355,Phypa1|38748  
 AT1G56500 Phypa1|603,Phypa1|26809  
 AT4G16510 Phypa1|25204  
 AT2G20920 Phypa1|26711,Phypa1|36417  
 AT1G64600 Phypa1|37666  
 AT3G16980,AT4G16265 Phypa1|35415  
 AT5G01220 Phypa1|25389,Phypa1|27095,Phypa1|22121,Phypa1|22366,Phypa1|20863,Phypa1|30758  
 AT5G27410,AT3G05190 Phypa1|27064,Phypa1|28700,Phypa1|31360  
 AT1G08120,AT5G26110 Phypa1|37683  
 AT5G14760 Phypa1|29837  
 AT4G19020,AT1G69770,AT1G80740 Phypa1|27792  
 Phypa1|35962,Phypa1|26884  
 Phypa1|28444,Phypa1|30058,Phypa1|30136  
 AT2G30110,AT5G06460  
 AT5G53310 Phypa1|19509  
 Phypa1|28406,Phypa1|26728  
 AT4G11910,AT4G22920  
 AT1G44000 Phypa1|1170,Phypa1|24793  
 AT1G15010,AT2G01300 Phypa1|815,Phypa1|2188  
 AT1G78910,AT3G19440 Phypa1|25924  
 AT4G27400,AT5G54370,AT1G54890,AT5G60520,AT5G60530  
 Phypa1|1293,Phypa1|1294,Phypa1|1292,Phypa1|1295  
 AT4G28470,AT2G20580,AT4G08140 Phypa1|35947,Phypa1|30616  
 AT4G02725 Phypa1|278  
 AT4G00050,AT1G02340,AT3G62090,AT1G68240 Phypa1|33257,Phypa1|33282  
 AT1G71270,AT1G71300 Phypa1|39001  
 AT5G66200,AT4G36030,AT4G34940,AT3G26600 Phypa1|1790,Phypa1|3041,Phypa1|28642,Phypa1|2917  
 AT2G44920 Phypa1|2104,Phypa1|26571  
 AT1G26940 Phypa1|696  
 AT1G54650 Phypa1|29092  
 AT1G12230 Phypa1|24235  
 AT2G04700 Phypa1|1211,Phypa1|36057  
 AT2G46230,AT1G26530 Phypa1|23700,Phypa1|37359  
 AT5G24060,AT3G59300 Phypa1|33198  
 AT1G53450,AT3G14830 Phypa1|36214  
 Phypa1|1171,Phypa1|2117,Phypa1|766  
 AT2G02850,AT1G17800,AT5G07475  
 AT2G32300  
 Phypa1|2197,Phypa1|2165,Phypa1|2330,Phypa1|1252,Phypa1|4225  
 AT5G26330,AT2G26720,AT2G31050,AT5G20230  
 AT3G60270,AT3G60280,AT2G44790  
 Phypa1|32834  
 Phypa1|1611  
 AT3G27200,AT1G22480,AT1G72230  
 AT4G28365,AT4G32490,AT4G27520,AT3G20570,AT4G31840,AT2G25060,AT5G25090,AT2G23990,AT4G30590,AT5G57920,AT1G48940,AT3G18590,AT1G79800,AT1G64640  
 AT4G12880,AT5G15350,AT3G01070,AT2G27035  
 Phypa1|8866,Phypa1|1667,Phypa1|34858,Phypa1|32774,Phypa1|33475  
 AT4G01380,AT1G45063,AT3G53330,AT3G28958 Phypa1|31729  
 Phypa1|19485  
 AT5G17230 Phypa1|39081,Phypa1|37554,Phypa1|19484  
 AT5G16740  
 AT2G39130,AT3G54830,AT3G09340,AT3G09330,AT5G02170,AT5G02180 Phypa1|40,Phypa1|35369  
 AT5G15240,AT3G28960  
 AT2G41190  
 Phypa1|30138,Phypa1|25664,Phypa1|1020  
 Phypa1|19248,Phypa1|31946  
 Phypa1|33840  
 Phypa1|33841

AT5G17370  
     Phypa1|33992,Phypa1|35587,Phypa1|8346  
 AT2G43250           Phypa1|24602  
 AT4G07670,AT5G19740           Phypa1|28747,Phypa1|30397  
 AT3G54720           Phypa1|30686  
 AT1G48630,AT3G18130,AT1G18080           Phypa1|39502,Phypa1|39468,Phypa1|31895  
 AT5G59980           Phypa1|32857  
     Phypa1|13070,Phypa1|33575,Phypa1|36236  
 AT1G44170,AT4G34240           Phypa1|29621,Phypa1|36763  
 AT4G36250  
     Phypa1|31141  
 AT5G43830,AT3G22850,AT4G27450,AT3G15450,AT5G19140           Phypa1|29487,Phypa1|37180  
 AT2G19560           Phypa1|37932  
 AT5G13700           Phypa1|33416,Phypa1|5468  
 AT5G54080           Phypa1|14018  
 AT3G47430           Phypa1|25427,Phypa1|37394,Phypa1|36118  
     Phypa1|7443  
 AT3G19840           Phypa1|3466,Phypa1|38519  
 AT4G38090           Phypa1|22827,Phypa1|3541  
 AT3G59090           Phypa1|32113,Phypa1|32866,Phypa1|34419  
 AT1G66130,AT1G34200,AT4G09670           Phypa1|24212,Phypa1|36026  
     Phypa1|30772  
 AT1G29800,AT3G43230           Phypa1|39526  
     Phypa1|25005  
 AT4G18270           Phypa1|22829,Phypa1|30936  
 AT2G35110Phypa1|36469,Phypa1|25967  
     Phypa1|347  
 AT3G42050           Phypa1|38605,Phypa1|32063  
 AT2G47790           Phypa1|24870,Phypa1|31771,Phypa1|37134  
 AT1G56460,AT2G47350,AT3G06660           Phypa1|33593  
 AT2G03870           Phypa1|37526,Phypa1|38488,Phypa1|39186  
 AT5G55120,AT4G26850           Phypa1|93,Phypa1|33814,Phypa1|994  
 AT1G77840,AT1G36730           Phypa1|36956,Phypa1|112  
 AT3G52940           Phypa1|4932  
 AT5G24460           Phypa1|2063  
 AT1G44770           Phypa1|4415  
 AT2G26280           Phypa1|33108,Phypa1|34225  
 AT2G43980           Phypa1|8141,Phypa1|30063  
 AT4G00755           Phypa1|32444,Phypa1|38908,Phypa1|5696  
 AT5G28740           Phypa1|37283  
 AT4G20070           Phypa1|30383,Phypa1|24325  
 AT4G22550           Phypa1|35094,Phypa1|7417  
 AT5G23040,AT3G51140           Phypa1|26694,Phypa1|25990,Phypa1|26984,Phypa1|39387,Phypa1|38818  
 AT3G21500,AT4G15560           Phypa1|23731,Phypa1|28157,Phypa1|7691,Phypa1|36037  
 AT5G11380Phypa1|22231  
 AT5G14260           Phypa1|38626,Phypa1|28716  
 AT1G48380           Phypa1|8379,Phypa1|35726  
 AT1G03190           Phypa1|39136  
 AT4G15210,AT2G32290  
 AT5G18670  
 AT3G23920           Phypa1|19307,Phypa1|25352,Phypa1|39405,Phypa1|37053  
     Phypa1|5100  
 AT4G17090  
     Phypa1|36010  
 AT5G55700  
 AT4G00490,AT2G45880,AT5G45300           Phypa1|25150,Phypa1|23917  
 AT3G20660,AT1G16370,AT1G79410,AT1G16390,AT1G79360,AT1G73220           Phypa1|38842  
 AT1G07705,AT5G59710           Phypa1|25661,Phypa1|25992,Phypa1|37948  
 AT5G19390,AT5G12150,AT4G24580           Phypa1|29612,Phypa1|26983  
 AT4G14342,AT3G23325           Phypa1|37649  
 AT5G63280,AT5G40710           Phypa1|14554,Phypa1|35575,Phypa1|9365  
 AT2G25080,AT4G31870,AT1G63460,AT4G11600,AT2G48150,AT3G63080,AT2G43350,AT2G31570  
     Phypa1|27759,Phypa1|36985,Phypa1|29810,Phypa1|3078,Phypa1|23651,Phypa1|29935  
 AT1G79390           Phypa1|29665  
 AT1G02660,AT3G62590,AT3G61680  
     Phypa1|1815,Phypa1|37661,Phypa1|34853,Phypa1|6407,Phypa1|25367  
 AT4G02485           Phypa1|1143  
 AT4G02980           Phypa1|30178  
 AT4G26870,AT4G31180           Phypa1|17380  
 AT2G20890           Phypa1|28048,Phypa1|28624  
 AT4G34350           Phypa1|37616,Phypa1|38440  
     Phypa1|23084  
 AT2G31530           Phypa1|1432  
 AT3G58670,AT2G42670,AT5G15120,AT5G39890,AT1G18490           Phypa1|217,Phypa1|16026,Phypa1|37818  
 AT1G57600           Phypa1|3162  
 AT5G51710,AT5G11800,AT2G19600           Phypa1|27047,Phypa1|471  
 AT1G49880           Phypa1|24353  
     Phypa1|28626  
 AT2G19570,AT4G29650,AT4G29610,AT4G29640,AT4G29630,AT4G29600,AT4G29620,AT4G29580,AT4G29570  
     Phypa1|31521,Phypa1|38137,Phypa1|26144  
     Phypa1|38452,Phypa1|37225,Phypa1|39670  
     Phypa1|29216

AT3G13870,AT1G72960,AT5G45160  
AT1G67210,AT5G38600 Phypa1|33149  
AT3G52270,AT1G75510 Phypa1|28298  
AT4G24620 Phypa1|13185,Phypa1|26376  
AT3G47930 Phypa1|25738  
AT3G20510,AT1G50740 Phypa1|34754  
AT3G54770,AT5G53680,AT5G53720,AT1G22335,AT3G06970  
AT1G33470  
AT2G46780 Phypa1|829  
Phypa1|325  
AT1G78260,AT1G22330  
AT1G22910  
AT1G20880,AT1G76460 Phypa1|667  
AT4G33670 Phypa1|25893,Phypa1|37604,Phypa1|23615  
AT4G09680 Phypa1|35812  
AT3G62190 Phypa1|38691  
AT1G69010,AT5G08130,AT5G38860 Phypa1|1519  
AT1G19710,AT1G75420 Phypa1|25393  
AT2G47115,AT5G62960,AT3G27770,AT1G10660,AT1G70505 Phypa1|36552,Phypa1|32974  
AT1G44674,AT1G27000,AT2G02730,AT1G04960 Phypa1|2004,Phypa1|2008,Phypa1|27992  
AT1G11480Phypa1|34477  
AT5G24314 Phypa1|35099  
AT2G39730 Phypa1|34615,Phypa1|29505,Phypa1|34614,Phypa1|37749,Phypa1|24123  
AT1G73110Phypa1|30353  
AT2G32980 Phypa1|2001  
AT5G41850 Phypa1|28481,Phypa1|11754  
AT1G19670,AT5G43860 Phypa1|24812  
AT3G51270 Phypa1|36411  
AT3G17810 Phypa1|29791,Phypa1|7485  
AT1G36180,AT1G36160 Phypa1|24946,Phypa1|37383,Phypa1|6054,Phypa1|6055  
AT5G66600,AT2G23700,AT3G18900,AT1G21060,AT1G76620,AT1G43020  
Phypa1|32775  
AT3G13000,AT1G16750  
Phypa1|24342,Phypa1|8580,Phypa1|24640,Phypa1|30380,Phypa1|25273,Phypa1|38114,Phypa1|36327  
AT3G12540,AT2G39690,AT5G60720  
AT5G47380 Phypa1|7931,Phypa1|30641  
AT4G33130,AT3G47675 Phypa1|14044  
Phypa1|6923  
AT3G09860 Phypa1|8273  
AT3G21190,AT1G51630 Phypa1|27735  
AT2G44580 Phypa1|5813  
AT1G30110,AT5G06340,AT3G10620 Phypa1|1541  
AT5G42850 Phypa1|30217  
AT3G53470 Phypa1|32634  
AT3G25040,AT1G29330 Phypa1|32271,Phypa1|39466  
AT2G23370,AT4G34090 Phypa1|39125,Phypa1|29128  
AT1G65020 Phypa1|23759,Phypa1|30406  
Phypa1|27290  
AT2G30100 Phypa1|27726  
AT1G15220 Phypa1|36582  
AT5G37260,AT5G17300  
AT2G46830,AT1G01060  
AT3G10113,AT1G18330 Phypa1|327  
Phypa1|27370  
AT5G11900Phypa1|34042,Phypa1|38736  
AT4G21970,AT4G04630,AT4G26950,AT1G11700,AT1G61930,AT4G21930,AT1G29640,AT2G34340,AT5G45630,AT4  
G18980,AT3G15040,AT5G03230,AT3G45210,AT5G60680,AT2G28400 Phypa1|26870,Phypa1|35565  
AT3G24315 Phypa1|13172,Phypa1|32969  
AT1G29880,AT3G44740,AT1G29870 Phypa1|37920  
Phypa1|20479  
AT4G20890,AT5G44340,AT1G75780,AT1G20010  
Phypa1|2728,Phypa1|38845,Phypa1|103,Phypa1|39453,Phypa1|24215,Phypa1|36957,Phypa1|33604,Phy  
pa1|39452,Phypa1|25784,Phypa1|27230,Phypa1|25303  
AT5G19780,AT5G19770 Phypa1|29087,Phypa1|24003,Phypa1|39614,Phypa1|39615  
AT3G61650,AT5G05620 Phypa1|35091,Phypa1|34902  
AT1G04820,AT1G50010,AT4G14960  
AT1G64740  
Phypa1|11420  
Phypa1|19700,Phypa1|3951,Phypa1|24877  
Phypa1|9269  
AT5G12250  
AT5G62690,AT5G62700,AT5G23860,AT2G29550  
Phypa1|28033  
Phypa1|38735  
Phypa1|1322  
Phypa1|3003,Phypa1|3364  
Phypa1|4371  
Phypa1|26208  
AT3G17170 Phypa1|22166,Phypa1|32518  
AT5G27490,AT3G05280,AT2G39805 Phypa1|2005,Phypa1|35001,Phypa1|34786  
AT2G24940 Phypa1|24166  
AT5G52240,AT3G48890 Phypa1|11133,Phypa1|38898,Phypa1|23723,Phypa1|6836

AT5G42620 Phypa1|32151,Phypa1|27462,Phypa1|7991,Phypa1|7989  
 AT3G14700,AT5G16780 Phypa1|38912  
 AT2G15240 Phypa1|38054,Phypa1|39201  
 AT3G25570,AT5G15950,AT3G02470,AT5G18930  
 Phypa1|25539,Phypa1|25551,Phypa1|37595,Phypa1|37596,Phypa1|37513,Phypa1|39604  
 AT2G31410 Phypa1|23935  
 AT3G26410 Phypa1|23939  
 AT1G68830 Phypa1|37079,Phypa1|37398  
 AT5G01920 Phypa1|25934  
 AT3G15840 Phypa1|32284,Phypa1|27450,Phypa1|39479  
 AT5G52520 Phypa1|29743  
 AT5G10880  
 Phypa1|24740  
 Phypa1|31033  
 AT3G62120  
 AT3G51840 Phypa1|36964,Phypa1|28173  
 AT3G09890 Phypa1|27848  
 AT4G32270 Phypa1|27888  
 AT2G44270,AT1G76170 Phypa1|24156  
 AT1G79210,AT1G16470 Phypa1|3564,Phypa1|38667  
 AT1G49160,AT3G18750,AT1G64630,AT5G41990 Phypa1|17402,Phypa1|12702  
 AT5G58350,AT3G51630,AT5G55560  
 AT3G48260 Phypa1|42,Phypa1|29305  
 AT5G28080,AT3G04910,AT3G22420  
 Phypa1|31725,Phypa1|38302,Phypa1|25671  
 AT3G03330,AT3G03350 Phypa1|37707,Phypa1|37292  
 AT3G47350,AT3G47360,AT5G50590,AT5G50690,AT5G50770,AT5G50600,AT5G50700  
 Phypa1|1062  
 AT4G10020 Phypa1|36962  
 Phypa1|31437  
 AT1G49540 Phypa1|30532  
 AT5G42890 Phypa1|38299  
 Phypa1|16294  
 AT4G17380 Phypa1|29206  
 AT4G37090 Phypa1|33651  
 AT5G46390 Phypa1|26023,Phypa1|39295  
 AT3G50430 Phypa1|32987  
 AT5G15610,AT3G02200 Phypa1|38714,Phypa1|6915,Phypa1|9718  
 AT2G39050 Phypa1|24633,Phypa1|24600,Phypa1|26906  
 Phypa1|8140  
 Phypa1|26481,Phypa1|2011  
 Phypa1|26375  
 AT2G15290  
 AT2G04740 Phypa1|33597  
 AT1G45150 Phypa1|28549  
 AT5G61850 Phypa1|33349,Phypa1|32902  
 AT5G42970 Phypa1|37700  
 AT5G32470 Phypa1|27816  
 AT5G11580Phypa1|26915,Phypa1|27917,Phypa1|9419,Phypa1|27156,Phypa1|933,Phypa1|26815  
 AT5G62000,AT1G59750,AT4G23980,AT3G61830,AT2G46530,AT1G34170,AT1G34390,AT1G34310,AT1G35240,AT1G34410,AT1G35520,AT1G35540,AT1G43950  
 Phypa1|37940  
 AT1G19850  
 Phypa1|37987  
 AT5G20730,AT1G19220  
 AT1G30330,AT5G37020  
 Phypa1|2242,Phypa1|28072,Phypa1|1290,Phypa1|10918,Phypa1|27826,Phypa1|27185,Phypa1|34265,Phypa1|26644,Phypa1|8216  
 Phypa1|35014  
 Phypa1|27832  
 Phypa1|29691  
 AT2G33860,AT5G60450 Phypa1|1429,Phypa1|39512,Phypa1|38259  
 Phypa1|26623  
 Phypa1|39079  
 AT4G30080,AT2G28350 Phypa1|3016,Phypa1|24085  
 AT1G77850  
 AT2G01970,AT1G14670,AT5G37310 Phypa1|37539,Phypa1|39059  
 Phypa1|38309,Phypa1|30320  
 AT1G55130,AT3G13772 Phypa1|37265,Phypa1|10091,Phypa1|25382,Phypa1|27089,Phypa1|28167  
 AT1G08350  
 AT1G10950 Phypa1|30696,Phypa1|39726  
 AT4G12650,AT5G35160 Phypa1|38179,Phypa1|26550,Phypa1|35963  
 AT5G25100,AT5G10840,AT2G24170  
 AT2G21710 Phypa1|1791  
 AT2G37925,AT3G46900,AT2G26975,AT5G59030,AT5G59040 Phypa1|33971,Phypa1|26364  
 AT5G25340,AT1G80060,AT3G07860 Phypa1|29681,Phypa1|24495,Phypa1|38959  
 AT4G16280  
 AT4G03110,AT1G03457 Phypa1|24916,Phypa1|23970  
 Phypa1|1464,Phypa1|28427  
 AT2G47310  
 AT3G13800 Phypa1|39390  
 AT5G62140 Phypa1|28289,Phypa1|35613,Phypa1|32918

AT1G14980,AT1G23100 Phypa1|29754,Phypa1|37369,Phypa1|31667,Phypa1|24765  
 AT4G25660,AT4G25680 Phypa1|656,Phypa1|211,Phypa1|2057  
 AT4G29350,AT2G19760,AT5G56600,AT2G19770,AT4G29340  
 Phypa1|35941,Phypa1|35416,Phypa1|2575,Phypa1|38383  
 AT5G14170,AT3G01890 Phypa1|74,Phypa1|24744,Phypa1|39188  
 AT5G35560,AT2G20320 Phypa1|26686,Phypa1|28032  
 AT5G26680 Phypa1|38125,Phypa1|38515  
 AT1G77860 Phypa1|36012,Phypa1|37376,Phypa1|24508,Phypa1|26836  
 AT5G07250,AT1G12750,AT1G63120,AT4G23070,AT2G29050,AT3G53780,AT1G52580  
 Phypa1|39771,Phypa1|33656,Phypa1|27126  
 AT3G16650,AT4G15900 Phypa1|35685,Phypa1|28586  
 AT3G05230,AT5G27430 Phypa1|24248  
 AT3G01640,AT5G14470 Phypa1|23702  
 AT2G20690 Phypa1|37993  
 AT5G26710  
 Phypa1|14566,Phypa1|3839,Phypa1|20269,Phypa1|2883,Phypa1|30838,Phypa1|3840,Phypa1|26449,Phypa1|38568  
 AT3G55890,AT3G11230,AT2G40110,AT3G08990  
 Phypa1|38569,Phypa1|17128,Phypa1|36186,Phypa1|37495  
 AT4G27740  
 AT5G53940  
 AT4G27745 Phypa1|37641,Phypa1|37540  
 AT4G28130,AT2G20900 Phypa1|23858  
 AT1G27250  
 AT5G15040  
 AT5G15030  
 AT1G24250,AT1G23810,AT1G27270,AT1G27260,AT1G24230,AT1G27240,AT1G24210,AT1G24220,AT1G27280,AT3G24260,AT3G28870,AT1G10250  
 AT1G70060,AT1G24190,AT1G24200,AT1G59890,AT1G10450,AT5G15020,AT3G01320,AT1G70030,AT5G35610  
 Phypa1|1752,Phypa1|39355,Phypa1|30287,Phypa1|1754,Phypa1|37021,Phypa1|5  
 AT1G27220 Phypa1|307  
 AT3G52830 Phypa1|39720  
 AT2G24600,AT1G10340,AT1G34050,AT5G54710,AT5G50140,AT5G54720,AT3G12360,AT3G09550,AT1G05640,AT2G31820,AT1G07710,AT5G60070,AT5G02620,AT2G01680 Phypa1|16479,Phypa1|14381  
 AT5G54700  
 Phypa1|5109,Phypa1|10181  
 AT1G73240 Phypa1|30546  
 AT1G19740,AT1G75460 Phypa1|38343  
 AT3G09090 Phypa1|35437  
 AT5G05420,AT4G25340,AT3G12340 Phypa1|28353  
 AT3G18760 Phypa1|26192  
 AT3G56410,AT4G01090,AT1G01440,AT3G61670,AT2G46380 Phypa1|34682  
 AT4G14790,AT5G39840 Phypa1|28148  
 AT5G58080  
 AT2G01760  
 Phypa1|1480,Phypa1|1481,Phypa1|2059,Phypa1|1076  
 AT4G18020  
 Phypa1|25149,Phypa1|30283,Phypa1|24814  
 AT5G05090,AT3G10760,AT2G40970  
 AT4G16110,AT3G16857,AT1G67710  
 AT5G62120,AT1G49190,AT3G62670,AT1G68210,AT4G00760  
 AT2G27070,AT5G07210  
 AT2G20570,AT5G44190 Phypa1|3000,Phypa1|36306  
 Phypa1|1003,Phypa1|26063  
 AT3G46640,AT5G59570  
 AT4G31920,AT2G25180,AT5G49240  
 AT2G05210,AT2G04395,AT5G06310 Phypa1|6800  
 AT5G17500,AT5G16700,AT3G26140,AT1G13130,AT3G26130 Phypa1|481,Phypa1|1840  
 AT1G18060 Phypa1|28079  
 Phypa1|26040,Phypa1|27889  
 Phypa1|24645  
 Phypa1|1597  
 AT3G55270  
 AT5G44650 Phypa1|28782  
 AT5G40200 Phypa1|3171,Phypa1|37470  
 AT5G36950 Phypa1|32976  
 Phypa1|31669  
 AT1G54700,AT1G51150,AT5G54745  
 Phypa1|15354  
 Phypa1|9669  
 AT2G47940  
 AT3G16550,AT3G16540,AT1G65630,AT1G65640,AT5G40560  
 Phypa1|30931  
 Phypa1|30689  
 Phypa1|2851,Phypa1|27999,Phypa1|38892  
 AT2G26800  
 AT1G32050,AT1G61250,AT1G11180,AT2G20840,AT1G03550  
 Phypa1|36524,Phypa1|37882,Phypa1|36292,Phypa1|29481,Phypa1|36623  
 Phypa1|32580  
 AT5G62090,AT4G25515,AT4G25520  
 AT1G43850 Phypa1|14038  
 Phypa1|32635,Phypa1|35182,Phypa1|31884



AT1G47240,AT4G18790,AT2G23150,AT5G67330  
Phypa1|28150,Phypa1|24383,Phypa1|31495,Phypa1|11894  
AT1G80830,AT1G15960 Phypa1|10199,Phypa1|36379,Phypa1|31393,Phypa1|26399,Phypa1|28877  
AT1G64880 Phypa1|33808  
AT4G21610,AT4G20380,AT1G32540 Phypa1|36032,Phypa1|752  
AT1G50500,AT1G50970 Phypa1|35997,Phypa1|29648  
AT3G13330 Phypa1|27093,Phypa1|34294  
AT1G63940  
AT3G27820 Phypa1|37816  
AT3G52880,AT3G09940,AT5G03630 Phypa1|38866,Phypa1|34719,Phypa1|37728  
AT4G20040,AT4G20050 Phypa1|37933,Phypa1|39682  
Phypa1|3063  
AT5G54950,AT4G26970,AT2G05710,AT4G35830  
Phypa1|33231,Phypa1|29446,Phypa1|33984,Phypa1|18643  
AT5G26570 Phypa1|9530,Phypa1|36326,Phypa1|23670  
AT4G16970 Phypa1|5253  
AT4G29820,AT4G25550 Phypa1|25812  
AT2G32700  
AT4G32551 Phypa1|30305,Phypa1|1528,Phypa1|26132  
Phypa1|22751  
AT1G61215,AT3G60110,AT2G44430,AT3G57980,AT2G42150 Phypa1|34119  
AT1G20200,AT1G75990 Phypa1|36249,Phypa1|31640,Phypa1|9540  
Phypa1|4717  
AT4G10790 Phypa1|3082,Phypa1|60,Phypa1|24957  
AT3G57280 Phypa1|2084,Phypa1|711,Phypa1|1261  
AT1G03330 Phypa1|37980  
AT1G74470 Phypa1|38100,Phypa1|33675,Phypa1|38323  
AT1G26640 Phypa1|25804,Phypa1|27687  
AT3G62080 Phypa1|26430  
AT5G63000 Phypa1|34361  
AT3G57020,AT3G57010,AT2G41300  
AT3G57030,AT2G41290,AT1G74000,AT1G74020,AT1G74010 Phypa1|36367  
AT1G08470,AT5G22020 Phypa1|30363,Phypa1|36581,Phypa1|27627,Phypa1|8706,Phypa1|38000  
AT3G59530  
AT3G29350,AT5G39340,AT4G04402,AT1G03430,AT3G21510 Phypa1|27565,Phypa1|27567,Phypa1|25601  
AT5G19710,AT3G16360  
AT1G80100  
Phypa1|29792  
AT1G01320  
AT4G28080  
AT3G52140 Phypa1|35279,Phypa1|38269  
Phypa1|1745,Phypa1|1350  
AT1G15290  
AT1G30300,AT4G03610 Phypa1|28166  
AT5G15400 Phypa1|39384  
AT3G22320,AT3G57080,AT2G41340,AT3G54490,AT5G57980,AT3G16680  
Phypa1|2536,Phypa1|38441,Phypa1|27985  
AT1G29580,AT1G55080 Phypa1|32217  
AT2G47420,AT1G64560,AT5G66360 Phypa1|20488,Phypa1|27689  
AT5G55640 Phypa1|26953,Phypa1|38353  
AT2G28520,AT2G21410,AT4G39080  
Phypa1|24692,Phypa1|26529,Phypa1|37880,Phypa1|38952,Phypa1|27757  
AT1G71430 Phypa1|34508  
AT4G39160 Phypa1|35625,Phypa1|32013  
Phypa1|836  
AT4G38495 Phypa1|3079  
AT5G06260,AT4G34070 Phypa1|35254  
AT1G73570,AT1G18260 Phypa1|38321,Phypa1|426,Phypa1|25248  
AT1G77470 Phypa1|28058  
AT3G12050 Phypa1|39740,Phypa1|38799  
AT3G23890,AT2G13720 Phypa1|27650,Phypa1|25699  
AT4G24900 Phypa1|4861  
Phypa1|21980  
AT4G30120,AT2G19110,AT4G30110 Phypa1|29308,Phypa1|26338  
AT1G79190 Phypa1|11316  
AT2G31970 Phypa1|26282  
AT4G32600,AT1G80400 Phypa1|1900,Phypa1|1902  
AT1G63660 Phypa1|8806,Phypa1|23684  
AT3G53180  
Phypa1|38016,Phypa1|25727,Phypa1|39760,Phypa1|37410,Phypa1|22060,Phypa1|30910,Phypa1|4035  
AT3G11470Phypa1|27327  
AT1G05730,AT2G31725,AT1G05740,AT2G43720 Phypa1|33315  
AT3G02820 Phypa1|35883  
AT4G08790 Phypa1|31076  
AT5G58410 Phypa1|32585  
AT2G05830 Phypa1|1440  
Phypa1|29984,Phypa1|37316  
AT5G52510  
AT1G63100 Phypa1|36683,Phypa1|1838,Phypa1|18545  
AT4G37650 Phypa1|996,Phypa1|530  
Phypa1|3019,Phypa1|38123  
AT1G66350,AT1G14920,AT2G01570,AT5G17490,AT3G03450 Phypa1|38228,Phypa1|2901

AT1G50420 Phypa1|36842,Phypa1|37204  
AT2G37650  
Phypa1|28715,Phypa1|30275,Phypa1|39641,Phypa1|29052,Phypa1|36161,Phypa1|23873,Phypa1|11634  
AT5G41920  
Phypa1|39212,Phypa1|493  
AT1G21450  
Phypa1|4057  
Phypa1|25628,Phypa1|39064,Phypa1|25166,Phypa1|2981  
AT3G54220 Phypa1|961,Phypa1|30072,Phypa1|1385  
AT4G08250  
AT3G13840 Phypa1|12740,Phypa1|26833,Phypa1|64,Phypa1|36879  
Phypa1|36296,Phypa1|37202  
AT1G55580 Phypa1|12693,Phypa1|29319  
AT5G67411,AT3G49950 Phypa1|23773  
Phypa1|28966  
AT2G29060,AT1G07530,AT1G07520,AT3G46600,AT5G59450  
AT3G50650,AT5G66770 Phypa1|5119,Phypa1|38027  
AT4G17230,AT5G48150,AT1G50600,AT2G04890  
AT4G28400,AT2G20630,AT3G15260  
AT2G40860 Phypa1|23828  
AT2G34740  
AT1G18030  
AT2G25620,AT3G51470,AT2G33700,AT1G48040,AT3G17250,AT3G62260  
Phypa1|26514,Phypa1|27142,Phypa1|33023,Phypa1|36824,Phypa1|3814  
AT3G23360  
Phypa1|29697,Phypa1|33607,Phypa1|38581  
AT3G63340  
AT1G43900  
AT5G24940,AT5G10740,AT4G31750 Phypa1|17075,Phypa1|28654,Phypa1|36131  
AT1G34750,AT1G22280,AT1G78200  
Phypa1|39582,Phypa1|28415,Phypa1|24947  
Phypa1|29915  
AT3G27140,AT4G08260,AT2G30020,AT1G07160,AT2G40180,AT1G67820 Phypa1|33973  
Phypa1|27580  
AT4G27800 Phypa1|25832,Phypa1|24715  
AT5G53140 Phypa1|2075  
AT4G12240 Phypa1|165,Phypa1|579  
AT5G52010 Phypa1|1045  
AT5G55920,AT4G26600 Phypa1|29249  
AT5G14240 Phypa1|39210  
AT5G54760,AT4G27130,AT1G54290,AT5G54940 Phypa1|37921,Phypa1|38350,Phypa1|35952  
AT3G57610 Phypa1|38701,Phypa1|39417  
AT5G62440 Phypa1|24816,Phypa1|1164,Phypa1|5117,Phypa1|864  
AT3G48540 Phypa1|222  
AT2G21970 Phypa1|25063,Phypa1|32975  
AT3G29240,AT1G33780 Phypa1|32337  
AT5G48460,AT2G04750,AT5G35700,AT5G55400,AT4G26700 Phypa1|39494,Phypa1|37934  
AT1G75000,AT4G36830 Phypa1|37988  
AT5G13430,AT5G13440 Phypa1|24824,Phypa1|26098,Phypa1|4222,Phypa1|27967  
Phypa1|588  
Phypa1|36836,Phypa1|25295  
AT4G18370  
AT5G39830 Phypa1|25649  
AT3G27925 Phypa1|28458,Phypa1|28887  
AT2G32730,AT1G04810 Phypa1|39470,Phypa1|33801,Phypa1|23792,Phypa1|27504  
AT3G56460 Phypa1|28227  
AT1G80410 Phypa1|38020,Phypa1|33246,Phypa1|37583  
AT5G12900 Phypa1|27057,Phypa1|324,Phypa1|34434,Phypa1|27023  
AT3G25100 Phypa1|23800  
AT4G03180 Phypa1|32141  
AT1G29965,AT2G34480,AT3G14600  
Phypa1|37024,Phypa1|38636,Phypa1|38766,Phypa1|39259,Phypa1|3932,Phypa1|38546  
AT5G14570,AT1G12940,AT1G08100,AT1G08090,AT5G60770,AT3G45060,AT5G60780  
Phypa1|37012,Phypa1|11806,Phypa1|30713,Phypa1|26916,Phypa1|29451,Phypa1|24935,Phypa1|36041,  
Phypa1|27588  
AT3G47810 Phypa1|38218,Phypa1|38773  
AT5G35100 Phypa1|30512  
AT3G07670 Phypa1|34569,Phypa1|31799,Phypa1|24940  
AT5G21060 Phypa1|15082,Phypa1|27207  
AT1G31230,AT4G19710 Phypa1|27217,Phypa1|28835  
AT3G11900,Phypa1|6842,Phypa1|29027  
AT4G38250,AT2G42005,AT5G65990 Phypa1|548,Phypa1|25010  
AT3G17465 Phypa1|26228  
AT2G43240,AT3G59360 Phypa1|2965,Phypa1|38891  
AT5G04500 Phypa1|36777,Phypa1|27796,Phypa1|37740  
AT3G07890 Phypa1|36166,Phypa1|36127,Phypa1|23948  
AT1G62855,AT1G62850 Phypa1|20232  
AT2G42330,AT1G17070 Phypa1|847,Phypa1|28493,Phypa1|37874  
AT4G00840,AT3G60800,AT4G22750 Phypa1|29805  
AT4G09650 Phypa1|1539,Phypa1|28134,Phypa1|1134  
AT3G03320,AT2G43470 Phypa1|28666  
AT5G22080 Phypa1|35561

Phypa1|1203  
AT1G49950  
AT1G72740,AT1G17520,AT1G54260 Phypa1|1734  
AT3G49850,AT5G67580  
Phypa1|284  
AT4G31300 Phypa1|24496  
AT1G61040 Phypa1|32790  
AT2G25100 Phypa1|32911  
AT2G43360 Phypa1|24172,Phypa1|33161  
Phypa1|31048  
AT1G03960,AT5G44090,AT5G28900,AT5G28850,AT1G54450  
Phypa1|25731,Phypa1|37329,Phypa1|23676,Phypa1|38715,Phypa1|37536  
AT2G30790,AT1G06680  
Phypa1|1534,Phypa1|36805,Phypa1|36678,Phypa1|23930,Phypa1|26568,Phypa1|4557  
AT1G20580,AT1G76300 Phypa1|2592,Phypa1|25708,Phypa1|32406,Phypa1|24923  
Phypa1|2390  
Phypa1|5218  
Phypa1|14702  
AT1G24150,AT1G70140,AT1G59910,AT5G54650,AT4G15200,AT3G05470,AT5G67470,AT2G43800,AT3G25500,AT3  
G07540,AT5G48360 Phypa1|31949,Phypa1|14572  
AT5G26740,AT3G05940 Phypa1|1874,Phypa1|1000,Phypa1|26095  
AT5G52560 Phypa1|24441,Phypa1|37813  
AT3G11510,AT2G36160,AT3G52580 Phypa1|39496,Phypa1|37938  
AT5G23300 Phypa1|37870,Phypa1|6435,Phypa1|22056  
AT4G18330,AT2G18720 Phypa1|13038  
AT1G04170 Phypa1|37605  
AT5G20170 Phypa1|34383,Phypa1|19661  
AT3G53870,AT2G31610,AT5G35530  
Phypa1|32642,Phypa1|38428,Phypa1|39097,Phypa1|36273,Phypa1|39741,Phypa1|33958,Phypa1|24113  
AT5G39490,AT5G39480,AT5G39460,AT5G39450,AT5G39470 Phypa1|1832,Phypa1|37462  
AT3G15570,AT1G52770 Phypa1|73,Phypa1|1395  
AT5G10250  
AT3G49900  
AT1G03010,AT2G47860  
AT3G08660,AT3G08570  
AT3G50840,AT5G66560  
Phypa1|950  
Phypa1|760  
AT1G50280,AT3G19850,AT3G22104  
AT2G30520  
AT2G14820,AT2G23050,AT4G37590,AT5G67440,AT4G31820,AT1G67900,AT3G26490,AT5G47800  
AT3G49970,AT5G67385  
AT3G03510,AT5G17580  
Phypa1|16387  
AT3G44820  
Phypa1|13978  
AT5G48130 Phypa1|30655,Phypa1|939,Phypa1|1799  
AT1G30440,AT5G03250,AT5G13600 Phypa1|23907,Phypa1|452  
Phypa1|24  
Phypa1|19521  
AT5G48800 Phypa1|26606,Phypa1|27915,Phypa1|27706,Phypa1|446  
AT5G64330 Phypa1|32353  
AT1G71696 Phypa1|958  
Phypa1|21081  
AT1G15380,AT1G80160,AT2G28420 Phypa1|24079,Phypa1|37095,Phypa1|246  
AT3G07400 Phypa1|24851  
AT5G64760,AT5G09900 Phypa1|35053,Phypa1|36624,Phypa1|28284  
AT4G06534,AT4G06536 Phypa1|17757  
AT2G47390 Phypa1|32871,Phypa1|25004,Phypa1|39185  
AT1G69640,AT1G14290 Phypa1|24014  
AT3G01720 Phypa1|37568,Phypa1|26712  
AT5G25230,AT1G06220 Phypa1|23910,Phypa1|24000  
Phypa1|15774  
AT1G56070 Phypa1|24108,Phypa1|39716,Phypa1|39796,Phypa1|37276,Phypa1|39106,Phypa1|39107  
AT3G22980 Phypa1|36729  
AT2G31955 Phypa1|2908,Phypa1|5800  
Phypa1|31306  
AT4G21550 Phypa1|17124,Phypa1|18078,Phypa1|8110  
AT4G32010,AT2G30470 Phypa1|25640,Phypa1|26045  
AT4G34270 Phypa1|38705  
AT4G10130 Phypa1|35937  
AT5G51110Phypa1|3801  
AT1G29810 Phypa1|26357  
Phypa1|11467  
Phypa1|26315,Phypa1|24336,Phypa1|29402,Phypa1|6766,Phypa1|4053,Phypa1|31019  
AT5G43850 Phypa1|26769,Phypa1|33208,Phypa1|27677  
AT4G14716,AT4G14710,AT2G26400  
AT1G12400 Phypa1|25510,Phypa1|36261  
AT4G37280,AT1G02740 Phypa1|30552,Phypa1|25945  
AT5G15750 Phypa1|761  
AT5G30510 Phypa1|25651,Phypa1|25993,Phypa1|22524  
AT2G28660,AT3G24450,AT3G53530,AT2G37390,AT5G02600 Phypa1|1692,Phypa1|1691

AT2G15620 Phypa1|37562,Phypa1|29069  
Phypa1|30741  
Phypa1|18584  
AT4G24730 Phypa1|24821,Phypa1|24845,Phypa1|27445  
AT1G30755,AT1G34320,AT5G08660 Phypa1|26391,Phypa1|31881,Phypa1|27947  
AT3G52570 Phypa1|29210  
AT5G50330,AT4G24810 Phypa1|24588  
AT5G24130 Phypa1|30206  
Phypa1|8809  
AT1G65230 Phypa1|27457,Phypa1|29051  
AT1G68010 Phypa1|35720,Phypa1|3777  
AT5G02160 Phypa1|27001  
Phypa1|1663,Phypa1|1664  
AT5G42090,AT3G09570,AT5G18520,AT5G02630 Phypa1|28245,Phypa1|36365,Phypa1|26521  
AT1G22050,AT1G77870,AT3G01050,AT5G15460,AT3G26980,AT4G24990  
Phypa1|10625,Phypa1|27712,Phypa1|16857  
AT5G62740,AT1G69840,AT3G01290 Phypa1|38060,Phypa1|36205  
AT5G51570 Phypa1|23832  
AT3G07430,AT4G27990 Phypa1|29785,Phypa1|2157  
AT2G30330 Phypa1|38212  
AT1G33980 Phypa1|7588,Phypa1|31840,Phypa1|34994  
Phypa1|24672  
AT1G34040,AT1G34060 Phypa1|27213,Phypa1|38352  
AT1G23320,AT1G70560,AT4G24670 Phypa1|24523,Phypa1|37429  
Phypa1|25448  
AT4G39730,AT2G22170,AT5G65158 Phypa1|30229,Phypa1|28774  
AT5G62290 Phypa1|2199,Phypa1|32637  
AT4G17620 Phypa1|36528  
AT2G46060 Phypa1|33878  
AT5G09580,AT1G53345 Phypa1|37519  
AT4G15770 Phypa1|38931  
AT2G26210 Phypa1|38315  
AT4G32060 Phypa1|30379,Phypa1|26482  
AT3G11700,AT5G06390,AT3G52370,AT2G35860,AT5G05650 Phypa1|509,Phypa1|30527  
AT1G14990 Phypa1|38947  
AT3G18480 Phypa1|15068,Phypa1|24344,Phypa1|3865  
AT2G21385 Phypa1|29656  
AT4G01560 Phypa1|28153  
AT3G49470,AT1G33040,AT4G10480,AT5G13850,AT3G12390  
Phypa1|31001,Phypa1|24846,Phypa1|27867,Phypa1|24200,Phypa1|31700  
AT1G80720,AT1G15870,AT4G31930,AT2G39795,AT3G55605,AT2G46190,AT2G39790,AT5G05990,AT5G02050  
Phypa1|24190  
AT2G46505 Phypa1|33033  
AT1G58983,AT1G58684,AT1G59359,AT1G58380,AT2G41840,AT3G57490  
Phypa1|35713,Phypa1|39686,Phypa1|37833,Phypa1|24832,Phypa1|18390  
AT3G17611Phypa1|38355,Phypa1|38825  
AT1G21410,AT1G77000 Phypa1|38033,Phypa1|30308,Phypa1|27964,Phypa1|33884  
AT5G66020,AT3G51460,AT3G51830 Phypa1|30573,Phypa1|36593,Phypa1|37806,Phypa1|24750  
AT1G14530,AT2G02180,AT4G21790 Phypa1|1960,Phypa1|39413,Phypa1|29804  
AT3G04830,AT5G28220 Phypa1|581  
AT1G60550 Phypa1|28647  
AT3G22260,AT3G02070  
Phypa1|27235  
AT2G39320 Phypa1|31801  
AT5G03330,AT5G04250  
Phypa1|25631,Phypa1|30656  
Phypa1|32640  
AT1G16250 Phypa1|31957,Phypa1|34837  
Phypa1|37162  
Phypa1|6519,Phypa1|33077  
AT1G55270 Phypa1|38205  
AT3G61350 Phypa1|37165,Phypa1|28105  
Phypa1|11621  
AT2G24540  
AT1G30090  
AT2G29900,AT1G08700 Phypa1|36588  
AT5G05720,AT4G19610 Phypa1|38534  
AT3G54460 Phypa1|25090  
AT1G16770 Phypa1|36686  
AT1G74810,AT1G15460,AT5G25430,AT4G32510 Phypa1|33401  
AT2G47160,AT3G62270,AT3G06450 Phypa1|7319,Phypa1|27058  
AT5G58060,AT5G58180 Phypa1|39291,Phypa1|26377  
AT5G59560 Phypa1|35823,Phypa1|27984  
AT2G11000Phypa1|2933  
AT5G11500Phypa1|38354,Phypa1|23989,Phypa1|25383  
AT3G14740 Phypa1|163  
AT2G33540 Phypa1|8340,Phypa1|14362,Phypa1|37939  
AT2G47840,AT5G55710 Phypa1|1163  
AT5G58730 Phypa1|35932,Phypa1|621,Phypa1|26129  
Phypa1|31271  
AT1G48840,AT3G18350,AT5G23390 Phypa1|25512,Phypa1|38035,Phypa1|11590,Phypa1|25334  
AT2G21720

Phypa1|11591  
AT1G71240 Phypa1|26651,Phypa1|26214  
AT4G37920,AT1G36320 Phypa1|24585,Phypa1|26543,Phypa1|522  
AT4G38130 Phypa1|29158,Phypa1|38003  
Phypa1|31292  
AT3G44660,AT3G44490  
AT5G63110,AT5G35600  
AT3G44680 Phypa1|34425  
AT1G26470 Phypa1|25758  
AT5G23210,AT5G08260,AT3G17180,AT4G15100,AT1G11080,AT1G61130  
AT3G56540,AT3G52020,AT3G52010,AT3G52000,AT2G05850,AT3G63470  
AT2G33530,AT1G28110,AT2G12480,AT5G42240,AT5G42230,AT1G43780  
Phypa1|2921,Phypa1|24433  
AT3G25420,AT4G12910 Phypa1|28024  
Phypa1|9048  
AT1G15000 Phypa1|39474,Phypa1|25049  
Phypa1|23854,Phypa1|2758,Phypa1|28514,Phypa1|26464,Phypa1|28759  
AT3G45010,AT5G22980,AT3G10410 Phypa1|31213,Phypa1|37341,Phypa1|38654  
AT4G30810,AT3G07990,AT2G35780,AT2G35770,AT4G30610,AT2G24000,AT2G24010,AT3G02110  
Phypa1|26887,Phypa1|30417,Phypa1|28265,Phypa1|2547,Phypa1|30999,Phypa1|12013  
AT5G22960  
AT2G36070,AT2G20510 Phypa1|33005,Phypa1|28931  
AT5G04120 Phypa1|26595,Phypa1|16086  
Phypa1|31256  
AT3G50520  
Phypa1|37638  
Phypa1|27112,Phypa1|1456  
AT4G22260  
AT2G44040,AT3G59890 Phypa1|39270  
AT1G80770 Phypa1|28158  
AT1G63970 Phypa1|29928  
AT5G03200,AT3G09770,AT3G53410,AT3G06140,AT5G19080 Phypa1|547,Phypa1|39069  
Phypa1|19357  
AT5G64250 Phypa1|39388  
AT3G06290 Phypa1|32982  
AT3G54380 Phypa1|35872,Phypa1|28808  
AT1G08125 Phypa1|26272  
AT5G44170 Phypa1|2612  
AT1G06510 Phypa1|33725  
Phypa1|1326  
AT5G15790,AT3G02290,AT5G38895,AT5G05910,AT5G41350,AT4G00335,AT4G23450 Phypa1|387  
AT2G36010,AT5G22220,AT1G47870 Phypa1|36191,Phypa1|25914,Phypa1|30290,Phypa1|38899  
AT5G08560,AT5G43920 Phypa1|13040,Phypa1|28111  
AT1G16650 Phypa1|29482,Phypa1|28315  
AT3G59310,AT3G59340,AT2G45820,AT3G59330,AT3G59320 Phypa1|605  
AT2G17695 Phypa1|32239  
AT1G59520 Phypa1|26664  
AT2G23530,AT4G37110 Phypa1|32629  
Phypa1|10864  
Phypa1|32920,Phypa1|36422,Phypa1|27162  
AT1G02080  
AT1G67320 Phypa1|39723  
Phypa1|10455,Phypa1|26968  
AT5G51930,AT3G56060,AT5G51950,AT1G12570,AT1G72970 Phypa1|27161,Phypa1|24460  
AT1G73050,AT1G14190,AT1G14185 Phypa1|21535  
AT3G27080,AT3G27070,AT5G40930,AT1G27390 Phypa1|39503,Phypa1|23713  
AT4G00670,AT3G61260,AT2G45820,AT3G48940,AT5G23750 Phypa1|23669,Phypa1|1194  
AT5G10780 Phypa1|2422  
AT2G25240,AT2G26390,AT3G45220,AT1G47710,AT2G35580,AT1G62170,AT2G14540,AT1G64030,AT1G64010,AT1  
G51330,AT1G63280,AT1G64020 Phypa1|23876,Phypa1|25307,Phypa1|26567,Phypa1|38094  
AT5G10980  
Phypa1|24511  
Phypa1|24462  
AT1G01370 Phypa1|11498,Phypa1|39786  
AT4G40040 Phypa1|38172  
AT1G13370,AT1G75600  
AT1G19890  
AT4G40030  
Phypa1|25474  
AT5G12910  
Phypa1|31345  
Phypa1|2974  
AT5G10390,AT5G65360,AT1G09200,AT3G27360,AT5G10400,AT5G65350  
Phypa1|33627,Phypa1|38480,Phypa1|31002,Phypa1|28391,Phypa1|24798,Phypa1|23717,Phypa1|4604,P  
hupa1|3049,Phypa1|2891  
AT2G25110Phypa1|29059,Phypa1|28212,Phypa1|27633  
AT2G27450 Phypa1|38305  
AT1G21370 Phypa1|29903,Phypa1|26458,Phypa1|5875  
AT1G31410 Phypa1|26080  
AT2G44120,AT2G01250,AT3G13580 Phypa1|32237,Phypa1|39429,Phypa1|24202,Phypa1|31650  
AT1G80750 Phypa1|2528  
Phypa1|24413

AT3G20810 Phypa1|27571,Phypa1|32524,Phypa1|32072,Phypa1|4186,Phypa1|18034  
 AT3G01015,AT5G15510 Phypa1|33184  
 AT5G37478 Phypa1|15753  
 AT1G52825,AT4G14615 Phypa1|24259  
 AT5G51880 Phypa1|29658  
 AT5G55580 Phypa1|28112,Phypa1|987  
 AT5G67140 Phypa1|2054  
 AT3G42660 Phypa1|35542  
 AT3G13440 Phypa1|33380  
 AT1G05350 Phypa1|24437  
 AT2G22125,AT1G44120,AT1G77460 Phypa1|26813,Phypa1|25243  
 AT1G78480  
 AT4G15340,AT4G15370,AT5G48010,AT1G78500,AT5G36150,AT5G42600,AT1G78950,AT1G78955,AT1G66960,AT1G78960,AT1G78970  
 AT2G07050 Phypa1|38451  
 Phypa1|30755  
 Phypa1|32763  
 AT3G45130  
 Phypa1|6010  
 AT2G42070  
 Phypa1|27311  
 AT3G44310,AT3G44300,AT3G44320,AT5G22300 Phypa1|15024  
 AT3G17210 Phypa1|36891  
 AT3G58660,AT2G42650,AT1G06380 Phypa1|1064,Phypa1|116  
 AT1G36050,AT1G22200 Phypa1|38268,Phypa1|36775,Phypa1|2649,Phypa1|25933  
 AT3G22290 Phypa1|31905  
 Phypa1|1127  
 Phypa1|2062  
 AT2G37180,AT2G37170,AT3G53420,AT5G60660,AT2G39010,AT3G54820,AT2G16850,AT4G35100  
 Phypa1|37807,Phypa1|38631,Phypa1|38200,Phypa1|12811,Phypa1|27808  
 Phypa1|5211  
 AT4G00430,AT1G01620,AT2G45960,AT3G61430,AT4G23400 Phypa1|2413,Phypa1|33712,Phypa1|35316  
 Phypa1|7843,Phypa1|37377,Phypa1|38924,Phypa1|39258,Phypa1|29038  
 Phypa1|24691  
 AT4G37190 Phypa1|25581  
 AT3G22230,AT4G15000,AT2G32220 Phypa1|37016,Phypa1|37671,Phypa1|37974,Phypa1|33466  
 Phypa1|26523  
 AT3G06710  
 AT4G34100,AT4G32670 Phypa1|32142  
 Phypa1|329,Phypa1|8,Phypa1|31334  
 AT1G21640 Phypa1|38293  
 AT2G46890 Phypa1|32630  
 AT1G52590 Phypa1|31061,Phypa1|26615  
 AT2G02560 Phypa1|19723,Phypa1|38483  
 Phypa1|6237  
 AT2G35140 Phypa1|24660  
 AT5G42050  
 AT3G27090 Phypa1|35954,Phypa1|37436  
 AT5G23090,AT5G08190 Phypa1|28717,Phypa1|39531  
 AT1G05385 Phypa1|2094  
 AT1G29040 Phypa1|30632,Phypa1|26239,Phypa1|20906  
 AT5G63160,AT3G48360,AT1G05690,AT5G67480,AT4G37610 Phypa1|29945,Phypa1|39493,Phypa1|20131  
 AT4G19190,AT2G01100 Phypa1|2654  
 AT3G06000,AT5G19320,AT3G63130 Phypa1|36435,Phypa1|38817  
 AT1G30590,AT2G39240,AT2G34750 Phypa1|28758,Phypa1|28047  
 AT4G28706,AT5G43910 Phypa1|28873  
 AT1G50575 Phypa1|26750  
 AT1G54080,AT3G14100,AT1G17370 Phypa1|485,Phypa1|27138  
 AT1G17080,AT1G53560,AT3G14595,AT1G29970 Phypa1|38014,Phypa1|32480  
 AT3G26670 Phypa1|36966,Phypa1|36353  
 AT2G02710 Phypa1|135,Phypa1|28912  
 Phypa1|39731  
 AT1G15690 Phypa1|39624  
 AT1G16780,AT1G78920 Phypa1|27577,Phypa1|36257  
 Phypa1|35790  
 Phypa1|37996  
 AT3G59390 Phypa1|29266  
 AT2G20470,AT1G03920,AT3G23310,AT4G14350,AT1G30640 Phypa1|25340,Phypa1|10947,Phypa1|27199  
 AT4G33080,AT2G19400  
 AT5G09890 Phypa1|31776,Phypa1|33530,Phypa1|33518,Phypa1|25324  
 AT1G67590 Phypa1|2676,Phypa1|25754  
 AT2G02170,AT1G30320  
 AT3G57540,AT2G41870 Phypa1|19566,Phypa1|29395  
 Phypa1|3947,Phypa1|721,Phypa1|4028  
 AT1G53860  
 AT5G57570,AT5G57640,AT2G03230,AT5G02210,AT1G14060 Phypa1|27048  
 AT5G52950 Phypa1|33751  
 AT1G05150,AT2G32450 Phypa1|25327,Phypa1|25940,Phypa1|32571  
 AT5G61460,AT5G07660 Phypa1|38670  
 Phypa1|30668  
 AT2G20800,AT4G21490,AT4G05020,AT4G28220 Phypa1|36701,Phypa1|36370,Phypa1|27066  
 Phypa1|8510

AT5G50210,AT1G67810 Phypa1|26820,Phypa1|25245  
AT4G27940,AT2G46320 Phypa1|28076,Phypa1|27498  
AT1G28140 Phypa1|1984  
AT1G15660 Phypa1|19069  
AT3G61620 Phypa1|24247  
AT1G16570 Phypa1|2251  
AT1G51540,AT3G27220 Phypa1|25839  
AT4G35530 Phypa1|263  
AT5G36980,AT5G08600,AT4G02400 Phypa1|33385  
AT3G63390 Phypa1|34415,Phypa1|1201  
AT3G19770,AT5G09320 Phypa1|36517  
AT3G02570,AT1G67070 Phypa1|34558,Phypa1|36105  
AT1G04210 Phypa1|37236  
AT4G03280 Phypa1|27700,Phypa1|25766  
AT4G24090 Phypa1|24266  
AT3G56310,AT5G08370,AT5G08380 Phypa1|5440  
AT1G34630 Phypa1|38040  
AT3G53020,AT2G36620  
Phypa1|39119,Phypa1|36793,Phypa1|3964,Phypa1|33162,Phypa1|36655,Phypa1|38663  
AT1G33400 Phypa1|24938  
AT1G16610,AT1G79100 Phypa1|33859,Phypa1|23772,Phypa1|14611  
Phypa1|23047  
AT5G20050,AT5G35370  
AT2G21480,AT4G39110,AT5G61350  
Phypa1|6349,Phypa1|30416  
AT1G66460,AT5G37790  
AT2G18890  
Phypa1|1618,Phypa1|1042,Phypa1|39010,Phypa1|1834,Phypa1|2257,Phypa1|1382,Phypa1|2272,Phypa1|  
2273,Phypa1|1885,Phypa1|37371  
Phypa1|21094  
Phypa1|27434,Phypa1|26748,Phypa1|27222,Phypa1|28837  
AT3G15890,AT1G52540  
AT1G51940  
AT4G35030,AT2G16750  
Phypa1|29354,Phypa1|29088,Phypa1|27676,Phypa1|29200,Phypa1|1940,Phypa1|25831  
AT4G02630  
AT1G70520,AT1G19090,AT5G40380,AT1G70530  
AT5G01850  
Phypa1|9681  
AT2G24620  
AT1G07870,AT2G28590  
AT3G26700,AT3G21450  
AT1G29720  
AT2G24360,AT4G31170 Phypa1|27841,Phypa1|26765  
AT1G01540 Phypa1|35546,Phypa1|1407  
AT2G17160  
AT5G56890 Phypa1|1772,Phypa1|27354,Phypa1|30197,Phypa1|1768,Phypa1|1366,Phypa1|1771  
Phypa1|27647  
AT5G02070,AT3G53840  
Phypa1|25910,Phypa1|28092,Phypa1|26799,Phypa1|15065,Phypa1|24565,Phypa1|27804,Phypa1|1478,P  
hypa1|160,Phypa1|1373,Phypa1|24419,Phypa1|25723,Phypa1|25317  
AT3G57770  
AT1G53070  
AT3G19300,AT1G49730 Phypa1|425  
AT1G50990,AT5G01060,AT3G09240  
AT5G57035,AT2G19410,AT3G46410,AT1G51620  
AT2G39360  
AT4G35230 Phypa1|31711,Phypa1|28386,Phypa1|27871,Phypa1|24905,Phypa1|19585  
AT2G43230,AT3G59350,AT1G06700,AT2G30740,AT2G30730 Phypa1|27190,Phypa1|36902  
AT3G46930,AT5G58950,AT5G18470  
AT4G32300 Phypa1|2144,Phypa1|517  
Phypa1|3810  
AT1G11050Phypa1|458,Phypa1|36615  
AT3G21630 Phypa1|27406,Phypa1|23,Phypa1|26029,Phypa1|26381  
AT1G25390,AT1G66880,AT5G38210,AT1G18390  
AT3G15356 Phypa1|27855  
Phypa1|25083  
AT5G15730  
Phypa1|24927,Phypa1|17896,Phypa1|29534,Phypa1|15148  
Phypa1|29958  
AT2G17090  
Phypa1|5432  
Phypa1|27862  
AT2G41970  
AT1G30570  
AT2G40270  
AT2G45910,AT3G49060 Phypa1|2267,Phypa1|560,Phypa1|28763,Phypa1|1059  
AT1G72540,AT5G35580,AT2G05940,AT2G26290  
AT2G45590,AT4G25390,AT5G51770 Phypa1|450,Phypa1|28174  
Phypa1|2907  
Phypa1|23699  
AT4G18950,AT3G58760,AT2G43850,AT3G59830,AT2G31800

AT5G38560,AT1G26150 Phypa1|28445,Phypa1|1914,Phypa1|1873,Phypa1|38828,Phypa1|39084  
AT5G60900,AT4G18250,AT1G70250,AT1G66930,AT1G67000,AT1G66910,AT5G38260,AT5G38250,AT5G38240,AT1  
G66920,AT5G39020,AT5G39030  
AT4G21390,AT1G61610  
AT5G51270,AT4G25160,AT5G61550,AT5G61560,AT5G60090,AT5G60080  
AT1G53060 Phypa1|37534  
AT1G61860  
AT4G02010 Phypa1|27765,Phypa1|30858,Phypa1|37111  
Phypa1|2270,Phypa1|26225,Phypa1|29284  
AT5G01020,AT5G56460  
AT3G27560,AT5G40540,AT5G50180 Phypa1|23862,Phypa1|39443  
AT2G41890 Phypa1|1434,Phypa1|28702  
Phypa1|1903,Phypa1|27411,Phypa1|30303  
Phypa1|36771,Phypa1|1927  
AT1G11330,AT1G11350,AT1G11300  
AT5G57680 Phypa1|34566  
AT1G70740  
AT3G07070,AT3G24790,AT4G13190  
Phypa1|26503  
AT3G63260  
AT5G13160  
AT2G46850  
AT5G57670 Phypa1|27750,Phypa1|36116,Phypa1|982  
AT5G02800  
AT3G05140,AT5G35960,AT5G18910,AT5G10520,AT5G65530  
AT2G47060,AT3G62220,AT3G17410,AT1G48210,AT1G48220  
AT5G16500,AT3G02810  
AT1G21590,AT1G77280,AT5G63940  
AT5G58940  
Phypa1|1782,Phypa1|25781,Phypa1|445,Phypa1|26153  
Phypa1|24941  
Phypa1|1610  
Phypa1|17171  
AT5G65600,AT5G10530,AT5G06740  
AT2G17170  
Phypa1|1458  
AT2G23450,AT5G66790  
Phypa1|29384,Phypa1|1851,Phypa1|8746  
Phypa1|36982,Phypa1|25898  
AT4G28670  
Phypa1|1950,Phypa1|1894,Phypa1|642,Phypa1|1898,Phypa1|1890,Phypa1|570,Phypa1|1438  
Phypa1|7882  
Phypa1|19637,Phypa1|25338  
AT1G28390  
AT3G58690,AT1G54820,AT1G24030  
AT3G01840,AT2G30940  
AT5G22050,AT4G00955  
AT5G66710,AT3G50730,AT3G50720  
AT1G76370,AT1G20650  
AT2G28250  
Phypa1|36246  
AT5G54590 Phypa1|35990,Phypa1|25178  
AT2G39180,AT3G09780,AT5G39370  
AT4G23050,AT4G00340,AT3G06640,AT3G06620,AT3G06630,AT5G49470,AT1G67890  
Phypa1|8759  
AT2G23200  
AT5G11360,AT5G11410,AT5G11400,AT5G03350,AT5G25440  
AT2G07180  
AT3G26940  
AT4G14780,AT3G22750,AT5G50000,AT3G01490 Phypa1|18552,Phypa1|38542  
AT1G61460,AT1G61420,AT1G61480,AT1G61490,AT1G61500,AT1G61400,AT1G61440,AT1G61430,AT1G61550,AT1  
G61390,AT1G61380,AT1G61360,AT1G11280,AT1G61370  
AT3G57760,AT3G57740,AT1G65190,AT1G65250,AT1G67470,AT3G57640,AT3G52530,AT3G57700,AT3G57750,AT3  
G57710,AT3G57730,AT3G57720,AT1G07460  
Phypa1|629,Phypa1|26516  
AT2G28940 Phypa1|25457,Phypa1|37611,Phypa1|525,Phypa1|526  
Phypa1|662  
AT4G11890  
Phypa1|32364,Phypa1|39336  
AT1G65790,AT1G65800,AT4G21380,AT4G21366,AT4G21370,AT1G67520,AT4G27290,AT4G27300  
Phypa1|28210  
Phypa1|1897,Phypa1|27447,Phypa1|95,Phypa1|1138  
AT4G32000,AT2G25220,AT5G11020,AT1G80640 Phypa1|1855  
AT1G80870,AT5G42440,AT2G19130  
AT4G00330 Phypa1|39647,Phypa1|39181,Phypa1|39320,Phypa1|24628,Phypa1|10185  
AT4G03230,AT3G16030  
Phypa1|111  
AT2G33580,AT2G23770,AT2G01780  
AT5G18610 Phypa1|27775,Phypa1|27774,Phypa1|35327,Phypa1|30856  
AT3G57120 Phypa1|24624,Phypa1|563,Phypa1|37110,Phypa1|30256,Phypa1|31210  
AT5G47850 Phypa1|25566  
Phypa1|15431



AT4G11900  
AT1G18160,AT1G73660,AT5G11850,AT1G08720  
Phypa1|20733,Phypa1|27337,Phypa1|28699,Phypa1|30331,Phypa1|670  
AT5G54380 Phypa1|36278,Phypa1|25375,Phypa1|908,Phypa1|907,Phypa1|2620  
AT1G52310 Phypa1|26283,Phypa1|30565  
Phypa1|25880  
AT2G20300  
AT3G45390  
AT3G59420 Phypa1|31867  
AT1G16260,AT1G69730,AT1G79680,AT4G31100,AT4G31110,AT1G19390,AT1G17910,AT1G16120,AT1G16160,AT1G16140,AT1G16150,AT1G16130,AT1G79670,AT1G21250,AT1G21240,AT1G21230,AT1G21270,AT1G21210,AT3G25490  
Phypa1|28905,Phypa1|128,Phypa1|38335,Phypa1|1469  
Phypa1|27042,Phypa1|119,Phypa1|124,Phypa1|26756,Phypa1|28665,Phypa1|28671,Phypa1|28299,Phypa1|28311,Phypa1|1947,Phypa1|28292,Phypa1|28291,Phypa1|1035,Phypa1|25193,Phypa1|26933,Phypa1|28658  
AT3G09010,AT1G16670  
AT5G23170  
AT5G28680,AT3G04690,AT3G51550,AT5G38990,AT5G39000  
AT4G04960,AT4G28350,AT1G15530,AT2G29250,AT2G29220,AT3G55550,AT5G01550,AT5G01560,AT5G01540,AT3G08870,AT4G02410,AT4G02420,AT2G37710,AT3G53810,AT5G59260,AT5G59270,AT3G46760,AT5G60280,AT3G45440,AT5G60320,AT3G45330,AT3G45410,AT3G45420,AT5G60310,AT5G60300,AT3G45430,AT5G60270,AT3G59750,AT3G59740,AT3G59700,AT3G59730,AT2G43690,AT2G43700,AT4G29050,AT1G70110,AT1G70130,AT2G32800  
AT2G39660,AT3G55450,AT2G28930,AT1G07570,AT5G02290,AT1G26970,AT1G69790,AT2G02800,AT1G14370,AT1G74490,AT2G17220,AT1G76360,AT4G35600  
AT3G01300,AT5G15080,AT3G28690  
AT5G65500,AT4G20790  
AT3G16530  
Phypa1|25237,Phypa1|544,Phypa1|29373,Phypa1|28625  
Phypa1|28155,Phypa1|26575  
Phypa1|29550,Phypa1|1917  
AT5G46570  
AT5G03320,AT3G09830,AT2G39110  
AT4G23210,AT4G23300,AT4G23190,AT4G23200,AT4G23220,AT4G11530,AT4G11490,AT4G11480,AT4G11470,AT4G23240,AT4G23290,AT4G23320,AT4G11460,AT4G23250,AT4G23260,AT4G23140,AT4G23160,AT4G23150,AT4G23230,AT4G23180,AT4G23270,AT4G23280,AT4G23310,AT3G45860,AT4G23130,AT4G05200,AT4G21400,AT4G21410,AT4G00960,AT4G00970,AT4G38830,AT4G21230,AT4G04490,AT4G04500,AT4G04570,AT4G04540,AT4G04510  
AT5G24080  
AT4G34500  
AT5G55830,AT5G03140,AT3G53380  
AT4G01330  
AT2G48010 Phypa1|30618,Phypa1|30356  
AT2G42630  
AT1G14000  
AT5G42120,AT4G10390,AT1G33260  
Phypa1|29525  
AT1G55200,AT3G13690,AT5G56790  
Phypa1|36645,Phypa1|37982,Phypa1|1906,Phypa1|27895,Phypa1|21916  
AT1G62400  
Phypa1|17578,Phypa1|28952,Phypa1|29728  
Phypa1|30133,Phypa1|26798  
AT1G34300  
AT4G17660,AT5G47070  
Phypa1|586,Phypa1|38602,Phypa1|37033  
Phypa1|26368,Phypa1|26356,Phypa1|26278,Phypa1|25290,Phypa1|26281  
AT1G11410,AT1G11340  
AT1G16110  
Phypa1|2927,Phypa1|527  
AT1G53080 Phypa1|28697  
AT1G63500,AT5G41260,AT5G59010,AT3G54030,AT4G00710,AT1G01740  
AT1G21245  
AT3G45920  
AT3G55950  
AT1G70450,AT1G70460,AT1G23540,AT1G10620  
AT5G24010,AT3G46290,AT5G59700  
AT3G12000  
Phypa1|28104,Phypa1|977,Phypa1|26908  
AT3G20530  
AT1G22720  
AT1G17540,AT1G72760,AT5G35380,AT2G07020,AT2G24370,AT4G31230,AT1G16760,AT1G78940,AT5G12000,AT5G26150,AT3G20200 Phypa1|595  
Phypa1|30061,Phypa1|29922,Phypa1|29667,Phypa1|25006  
AT3G51990 Phypa1|514,Phypa1|38678  
AT1G52290,AT3G24540,AT3G24550,AT2G18470,AT1G49270,AT3G18810,AT4G34440  
AT2G11520  
AT2G42960,AT3G59110,AT1G56720,AT1G09440,AT5G18500,AT3G17420  
Phypa1|29531,Phypa1|27398,Phypa1|24354,Phypa1|28070  
AT1G61590  
Phypa1|16242  
AT4G38470,AT4G35780,AT2G17700  
Phypa1|29480,Phypa1|37174,Phypa1|28003,Phypa1|36295,Phypa1|38284,Phypa1|26089  
Phypa1|33797  
AT1G12470 Phypa1|30514  
AT3G56650 Phypa1|15903

AT5G55570 Phypa1|28754  
AT4G01150,AT4G38100 Phypa1|29042,Phypa1|2178,Phypa1|24773  
Phypa1|31346  
AT4G21470 Phypa1|38802,Phypa1|26432  
AT5G67070,AT3G23805,AT4G13950,AT2G33775,AT1G28270,AT3G16570,AT4G15800,AT3G05490,AT1G02900  
Phypa1|25434  
AT1G73740 Phypa1|30947,Phypa1|38329  
AT2G45540 Phypa1|397,Phypa1|25086,Phypa1|26590  
AT3G60920  
Phypa1|32002,Phypa1|35749  
AT1G67190 Phypa1|37986  
AT4G01160Phypa1|35140  
AT3G61600,AT2G46260 Phypa1|37277,Phypa1|26041  
AT2G23310,AT2G21600,AT4G39220,AT2G18240 Phypa1|35028,Phypa1|34245,Phypa1|38444  
AT5G22875 Phypa1|34420  
AT3G07950 Phypa1|25111,Phypa1|24053  
AT1G52300,AT3G16080,AT1G15250  
Phypa1|38356,Phypa1|36869,Phypa1|2423,Phypa1|38136,Phypa1|39167,Phypa1|352  
AT2G33585 Phypa1|32553  
AT3G05680 Phypa1|33674  
AT4G36750 Phypa1|2372,Phypa1|38132  
AT5G54500,AT4G27270  
Phypa1|38623,Phypa1|23760,Phypa1|2941  
AT5G58800 Phypa1|19951  
AT1G49980 Phypa1|22705  
AT2G34040,AT1G29030,AT3G19516 Phypa1|26185  
AT3G07300 Phypa1|28044,Phypa1|26715  
AT4G15440,AT5G42650 Phypa1|38900,Phypa1|7352,Phypa1|38750  
AT5G64230,AT3G19920 Phypa1|12080,Phypa1|27116  
AT5G17520 Phypa1|18289,Phypa1|30355,Phypa1|29579,Phypa1|34915,Phypa1|25045  
AT5G01740,AT3G10985 Phypa1|25952,Phypa1|30347,Phypa1|29391  
AT1G11680Phypa1|27738  
AT1G01910 Phypa1|34368,Phypa1|38473  
AT3G47990 Phypa1|1026  
AT4G20760 Phypa1|23223,Phypa1|26466  
AT1G18150,AT1G73670,AT3G18040,AT2G01450  
Phypa1|3072,Phypa1|36256,Phypa1|1575,Phypa1|28635  
Phypa1|36906  
AT4G01370,AT2G46070,AT1G01560,AT4G11330,AT1G07880 Phypa1|23945,Phypa1|26495  
AT1G10210,AT1G59580,AT4G36450,AT2G18170 Phypa1|34024,Phypa1|37602  
Phypa1|2607,Phypa1|2557  
Phypa1|23751,Phypa1|27452  
Phypa1|33133,Phypa1|24444,Phypa1|2624  
AT4G13020  
Phypa1|29444  
AT5G45430,AT4G19110  
AT5G19010 Phypa1|27019,Phypa1|27191  
AT1G18040,AT1G73690 Phypa1|32314,Phypa1|37346  
Phypa1|2665  
AT1G53510,AT3G14720,AT4G01595  
AT5G63610  
Phypa1|29483,Phypa1|32506  
Phypa1|37278  
AT2G42880  
AT4G28980 Phypa1|2276  
AT3G54180,AT2G38620 Phypa1|25824,Phypa1|39680  
AT3G59790  
AT2G43790,AT3G45640  
AT1G76540  
AT1G49380 Phypa1|1829  
AT5G16730,AT3G02930,AT4G27595,AT1G65010,AT4G40020 Phypa1|19234  
Phypa1|6718  
AT2G27550,AT5G03840,AT5G62040  
AT4G20370,AT1G65480  
AT1G18100 Phypa1|25725,Phypa1|26717,Phypa1|2955,Phypa1|27669  
AT5G46720,AT3G02910 Phypa1|28390,Phypa1|25444,Phypa1|30188,Phypa1|28441,Phypa1|30404  
AT4G29170 Phypa1|38530  
Phypa1|4771  
AT3G05170,AT1G08940 Phypa1|36258,Phypa1|192  
Phypa1|25024,Phypa1|31891  
AT4G33090 Phypa1|39543  
AT2G06530 Phypa1|24330,Phypa1|36543  
AT1G03950,AT5G44560 Phypa1|34442,Phypa1|2488,Phypa1|28385  
AT3G01340,AT2G30050 Phypa1|35298,Phypa1|27485,Phypa1|37469,Phypa1|27315  
AT4G21820 Phypa1|32007  
AT1G75020,AT3G18850 Phypa1|36846  
AT3G02790,AT5G16470 Phypa1|23996,Phypa1|27268,Phypa1|37338  
AT4G14970 Phypa1|34663  
AT4G28390  
AT5G56450 Phypa1|24004,Phypa1|39425  
AT5G13490,AT3G08580 Phypa1|3020  
Phypa1|29589,Phypa1|29592,Phypa1|26764,Phypa1|30665,Phypa1|38115,Phypa1|30662

AT5G17400  
 AT5G38720 Phypa1|32380  
 Phypa1|23123,Phypa1|23619  
 AT1G53580 Phypa1|27464,Phypa1|25549  
 AT1G04040,AT5G44020,AT4G29260,AT4G29270,AT5G51260,AT4G25150,AT2G39920,AT5G24780,AT5G24770,AT2  
 G38600 Phypa1|27764,Phypa1|30260,Phypa1|28223,Phypa1|30223,Phypa1|27598  
 AT1G56430,AT1G09240,AT5G56080,AT5G04950 Phypa1|30090  
 AT4G21540 Phypa1|29789,Phypa1|25272  
 AT3G05070 Phypa1|299  
 AT3G48500 Phypa1|3756  
 AT1G76080 Phypa1|29619,Phypa1|29946,Phypa1|1483  
 AT5G11980Phypa1|32306,Phypa1|442  
 AT4G02425 Phypa1|35119  
 Phypa1|14225  
 Phypa1|27074  
 Phypa1|9075  
 AT3G43920  
 AT4G15417,AT3G20420,AT5G45150 Phypa1|28303  
 Phypa1|34570  
 AT1G01040 Phypa1|33058,Phypa1|38419  
 AT1G02090 Phypa1|27239,Phypa1|37828  
 AT5G62630,AT1G74790,AT5G39970 Phypa1|1780,Phypa1|37098,Phypa1|22287  
 AT5G35730,AT2G32295 Phypa1|26678,Phypa1|39071  
 AT3G29075 Phypa1|33042  
 Phypa1|9874  
 AT5G67590 Phypa1|2151,Phypa1|780  
 AT4G20350 Phypa1|29702  
 AT1G77480,AT1G44130,AT4G33490  
 Phypa1|31558,Phypa1|13152,Phypa1|3248,Phypa1|4489,Phypa1|17222,Phypa1|33068  
 AT1G49050 Phypa1|502,Phypa1|30296,Phypa1|29988  
 Phypa1|33333  
 AT3G12250,AT5G06950,AT5G06960,AT1G68640 Phypa1|29493,Phypa1|37183,Phypa1|6586,Phypa1|2969  
 AT5G06839  
 AT1G08320  
 AT5G65210,AT5G10030,AT1G22070,AT1G77920  
 AT1G58330,AT1G09950  
 AT5G19470,AT5G19460 Phypa1|19134,Phypa1|30343,Phypa1|27296  
 AT3G02320,AT5G15810 Phypa1|25080  
 AT2G03350,AT5G01610,AT3G08890,AT5G37070 Phypa1|39122,Phypa1|36488  
 AT1G48140 Phypa1|17878,Phypa1|35886  
 AT3G06455,AT4G01000 Phypa1|33891  
 AT5G55200,AT4G26780 Phypa1|24201,Phypa1|39281  
 AT3G11397,AT5G05987,AT5G02040 Phypa1|39383,Phypa1|39734,Phypa1|32819  
 AT2G47760 Phypa1|492  
 AT4G38430 Phypa1|51,Phypa1|962  
 AT1G31650,AT1G79860,AT1G52240,AT3G16130,AT4G13240,AT3G24620,AT5G19560,AT4G00460,AT1G01700,AT2  
 G45890  
 AT5G02010,AT3G55660,AT5G05940 Phypa1|1825,Phypa1|2253,Phypa1|1824,Phypa1|937  
 AT2G23390 Phypa1|28550  
 AT1G04985 Phypa1|33940  
 Phypa1|7619  
 Phypa1|2537  
 AT5G42080,AT3G61760  
 AT1G14830,AT2G44590,AT3G60190  
 Phypa1|37894,Phypa1|34255,Phypa1|14809,Phypa1|32423,Phypa1|38961  
 AT2G14120,AT4G33650 Phypa1|34801,Phypa1|26246,Phypa1|28769,Phypa1|33700,Phypa1|27069  
 AT2G25500,AT5G66550,AT5G42770 Phypa1|39434,Phypa1|36490  
 AT1G14140 Phypa1|20220  
 Phypa1|15016  
 Phypa1|14922  
 AT3G54110  
 AT2G22500,AT4G24570,AT5G09470  
 Phypa1|34886,Phypa1|39404,Phypa1|30710,Phypa1|2566,Phypa1|24089  
 AT4G03115  
 Phypa1|39596  
 AT5G01340 Phypa1|39109,Phypa1|30130  
 AT5G58970  
 AT5G19760 Phypa1|35593,Phypa1|37864,Phypa1|29752  
 Phypa1|38619,Phypa1|36106  
 AT1G80890,AT1G16000 Phypa1|33880  
 AT2G42690,AT1G06250,AT2G31100,AT4G18550 Phypa1|4728,Phypa1|16255  
 AT2G44810,AT4G16820,AT2G31690,AT1G05800 Phypa1|29431,Phypa1|29436,Phypa1|6351  
 AT1G30370 Phypa1|8913,Phypa1|75  
 AT2G30550,AT1G06800,AT1G51440  
 AT1G18190 Phypa1|4154  
 Phypa1|31235  
 AT4G02610,AT3G54640 Phypa1|24994  
 AT5G06070,AT3G23130,AT3G53820,AT3G09290,AT5G43540,AT2G37740,AT3G23140,AT2G42410  
 AT4G17810  
 Phypa1|29861,Phypa1|25936  
 Phypa1|24881,Phypa1|24393,Phypa1|24656  
 Phypa1|25044,Phypa1|28764

Phypa1|24345  
AT4G24380,AT5G65400 Phypa1|2023  
Phypa1|29457,Phypa1|25682  
AT4G17830 Phypa1|30609,Phypa1|36086  
AT1G28490 Phypa1|27805,Phypa1|32993,Phypa1|26732,Phypa1|11455  
AT2G31200,AT2G16700,AT4G34970,AT5G59890,AT3G46010,AT3G45990,AT3G46000,AT5G59880,AT4G25590,AT5  
G52360,AT4G00680,AT1G01750 Phypa1|39366  
AT4G33940,AT1G22510,AT1G72175 Phypa1|37105  
AT1G31910 Phypa1|36821  
AT3G45740 Phypa1|33825,Phypa1|30529  
Phypa1|27870  
Phypa1|27878  
AT3G43300  
Phypa1|33821  
Phypa1|23586  
Phypa1|25219,Phypa1|25226,Phypa1|30297  
AT1G01960,AT3G60860 Phypa1|36033,Phypa1|39478  
AT4G38200,AT4G35380  
Phypa1|16155,Phypa1|1352  
Phypa1|15735  
AT3G48110Phypa1|35269  
Phypa1|22139  
Phypa1|21764  
Phypa1|28247  
Phypa1|27399  
Phypa1|10144  
Phypa1|2125  
Phypa1|26199  
Phypa1|28794  
Phypa1|29147  
Phypa1|25979  
Phypa1|1532  
AT2G42245,AT2G42240  
AT3G13700 Phypa1|28018  
AT3G21215 Phypa1|29514  
Phypa1|31425  
Phypa1|29231  
AT5G27470 Phypa1|28204,Phypa1|24969  
AT1G11870  
Phypa1|23401  
Phypa1|11349  
AT4G30950 Phypa1|39438  
Phypa1|31467  
Phypa1|26688,Phypa1|27056  
AT4G04480,AT4G22030 Phypa1|19959  
AT3G04780 Phypa1|2978,Phypa1|36427,Phypa1|16126  
AT2G13840 Phypa1|30685,Phypa1|21751  
Phypa1|1875  
AT1G73720 Phypa1|38426,Phypa1|37253  
AT2G39800,AT3G55610 Phypa1|31204,Phypa1|25304  
AT5G25450,AT4G32470 Phypa1|37647,Phypa1|36074,Phypa1|30064  
AT2G01320 Phypa1|29464  
AT3G30842,AT1G15520,AT2G26910,AT2G36380,AT1G66950  
Phypa1|8068  
AT2G39350,AT3G55090,AT5G13580,AT3G53510,AT2G37360,AT3G55130,AT3G55110,AT3G55100  
Phypa1|24787,Phypa1|27747,Phypa1|27250  
Phypa1|26681  
AT5G60740,AT2G37010,AT1G53390  
AT1G71960  
Phypa1|1182  
Phypa1|2628  
Phypa1|920  
Phypa1|35189  
AT3G13220  
Phypa1|14553  
AT1G31770,AT3G25620,AT4G27420  
AT2G37280,AT3G53480,AT4G15215,AT4G15230,AT4G15233,AT4G15236  
AT2G13610,AT1G53270 Phypa1|30410,Phypa1|38972,Phypa1|37911,Phypa1|7012,Phypa1|27771  
AT5G06530,AT3G52310 Phypa1|26661  
Phypa1|13755  
Phypa1|28621  
AT2G29940 Phypa1|24515,Phypa1|36039,Phypa1|21925  
Phypa1|1779,Phypa1|26825,Phypa1|34472,Phypa1|1777,Phypa1|428  
Phypa1|39658  
Phypa1|37822,Phypa1|28567  
AT5G19410,AT5G52860,AT4G25750  
AT1G15210,AT1G59870,AT3G16340  
Phypa1|37481,Phypa1|25364,Phypa1|28446,Phypa1|26844,Phypa1|25106,Phypa1|26848,Phypa1|36093,  
Phypa1|25834,Phypa1|28594,Phypa1|38650,Phypa1|12031,Phypa1|20045  
Phypa1|26961,Phypa1|24573,Phypa1|28557  
AT1G20700,AT1G20710 Phypa1|16826  
AT4G35550 Phypa1|235,Phypa1|239

AT3G56140,AT2G40400 Phypa1|420,Phypa1|912,Phypa1|8516  
AT3G60810 Phypa1|24817  
AT5G61670 Phypa1|17436  
AT5G06130 Phypa1|39667  
AT3G57220,AT2G41490 Phypa1|22313  
Phypa1|35195  
Phypa1|29105  
AT2G39020,AT2G39030 Phypa1|29299  
AT3G18790 Phypa1|23953  
AT5G64940 Phypa1|23990,Phypa1|27104  
AT3G07700 Phypa1|37768  
AT1G65950  
Phypa1|16176  
AT2G29530 Phypa1|36254  
AT5G01930  
AT2G20680,AT4G28320 Phypa1|2643,Phypa1|26002,Phypa1|38106,Phypa1|1008,Phypa1|28706  
Phypa1|27752,Phypa1|35961,Phypa1|25308  
AT1G02310,AT5G66460,AT3G30540,AT3G10900,AT3G10890 Phypa1|16132,Phypa1|33469  
AT1G50300 Phypa1|34120  
AT1G11020,AT1G50440,AT2G22120 Phypa1|24029  
AT1G03760 Phypa1|13937  
AT1G33240,AT1G76880,AT1G76890,AT5G28300,AT5G47660,AT3G10000,AT5G03680  
Phypa1|5452,Phypa1|10899,Phypa1|952,Phypa1|27149  
AT2G26830 Phypa1|35615,Phypa1|36144  
AT1G74320,AT1G71697,AT4G09760 Phypa1|23804,Phypa1|2914  
AT2G46650  
AT5G53560  
Phypa1|36244,Phypa1|38233  
AT1G26340,AT1G60660  
AT2G32720,AT5G48810 Phypa1|39023,Phypa1|36744  
Phypa1|26645,Phypa1|9824,Phypa1|1636  
Phypa1|30869,Phypa1|30739  
AT1G17890,AT1G73250 Phypa1|37876  
AT1G54590,AT1G03140 Phypa1|37990  
AT5G50375 Phypa1|38475  
AT5G53400,AT4G27890 Phypa1|2529,Phypa1|25902  
Phypa1|19489,Phypa1|5739,Phypa1|2325  
AT3G03305 Phypa1|427,Phypa1|28749,Phypa1|32742  
AT1G30845 Phypa1|15637  
Phypa1|29972,Phypa1|33598  
AT4G13040 Phypa1|25861  
AT1G59840 Phypa1|32798  
AT3G16860,AT4G16120,AT5G49270,AT4G27110,AT3G20580  
Phypa1|37852,Phypa1|36173,Phypa1|29678,Phypa1|25842,Phypa1|29270,Phypa1|37796,Phypa1|32973,  
Phypa1|37545  
AT1G53710 Phypa1|35154,Phypa1|39728  
AT2G39080 Phypa1|34819,Phypa1|36944  
AT5G40160,AT5G66055 Phypa1|34457  
AT5G26760 Phypa1|35381  
AT3G13570,AT1G55310 Phypa1|34315,Phypa1|24050,Phypa1|28742  
AT3G10400 Phypa1|15079  
AT3G55460  
AT5G18810  
Phypa1|25201,Phypa1|19,Phypa1|422,Phypa1|901  
Phypa1|10506  
AT4G36290,AT4G36280,AT4G36270 Phypa1|36575  
Phypa1|419,Phypa1|913  
AT4G24970,AT5G50780  
AT1G19100  
AT5G13130  
AT3G56840 Phypa1|26257  
Phypa1|29393  
AT5G35338,AT5G35330 Phypa1|29636  
AT5G66290 Phypa1|35267,Phypa1|36746  
AT5G13470 Phypa1|34694  
AT2G44175,AT5G57020 Phypa1|2902,Phypa1|35913  
Phypa1|21311,Phypa1|30504  
AT1G06570 Phypa1|36289,Phypa1|38330  
AT2G39450 Phypa1|36899,Phypa1|24889,Phypa1|2815  
AT1G16310,AT1G79520  
AT3G58060 Phypa1|8785,Phypa1|27583  
AT4G25890,AT5G57290 Phypa1|39216,Phypa1|37801  
AT5G37480 Phypa1|4624,Phypa1|25585  
AT4G26900 Phypa1|3102,Phypa1|38544  
AT2G42620 Phypa1|37333  
AT1G60600 Phypa1|26666  
AT1G66750 Phypa1|7785  
AT5G63370  
Phypa1|35193  
AT1G67580 Phypa1|924,Phypa1|2816  
Phypa1|6043  
AT1G53050

AT3G48750  
Phypa1|36762,Phypa1|39557  
AT5G50860,AT1G54610,AT3G05050  
Phypa1|2930,Phypa1|23925  
AT1G71530 Phypa1|39715  
AT3G01085,AT5G39420,AT1G18670,AT1G74330,AT5G44290,AT1G03740,AT4G22940  
AT4G10010,AT1G33770  
AT5G10270,AT5G64960 Phypa1|34917,Phypa1|24493,Phypa1|27865  
AT1G20930  
AT1G09600,AT1G57700  
AT3G45610,AT5G60200,AT2G28510  
AT5G60850  
Phypa1|1674  
AT5G62940,AT2G46590,AT3G61850,AT4G24060,AT1G64620  
AT5G62430,AT3G47500,AT5G39660 Phypa1|1687  
AT2G34140,AT1G29160,AT4G21030,AT4G21050,AT4G21080,AT4G21040,AT4G00940  
Phypa1|1678,Phypa1|32525  
AT3G55370 Phypa1|1677  
Phypa1|1686  
AT1G21340  
Phypa1|1676  
AT5G65590,AT4G38000  
AT1G26790,AT1G69570 Phypa1|1688  
AT5G02460,AT2G37590,AT2G28810,AT1G07640  
AT3G21270,AT1G51700,AT1G47655,AT5G66940,AT3G50410  
AT1G28310 Phypa1|1685  
Phypa1|30419,Phypa1|28297  
Phypa1|1675,Phypa1|15102,Phypa1|33929,Phypa1|34610,Phypa1|1565,Phypa1|27798  
AT3G52440 Phypa1|28592  
AT2G43110Phypa1|39420  
AT2G46455,AT2G46470,AT5G62050,AT1G44890 Phypa1|35429  
AT1G20410 Phypa1|38091  
AT1G22940 Phypa1|28497  
Phypa1|22669  
AT5G58280,AT5G42700,AT3G19184  
Phypa1|32441,Phypa1|24722,Phypa1|39722,Phypa1|2074,Phypa1|28553  
AT1G16900 Phypa1|35838  
AT1G74910,AT2G04650 Phypa1|25198,Phypa1|35993,Phypa1|38554  
AT4G13430 Phypa1|37694  
AT1G58643,AT1G58936,AT1G59312,AT1G59171,AT1G22100,AT5G42810 Phypa1|25516,Phypa1|26210  
AT1G55920,AT3G13110 Phypa1|2928,Phypa1|3044,Phypa1|29154  
AT2G17640,AT4G35640  
AT5G56760  
Phypa1|31336  
Phypa1|19694  
Phypa1|573  
AT2G38220,AT2G38185,AT5G01450 Phypa1|34729,Phypa1|34192,Phypa1|11757  
AT3G03460,AT5G17510 Phypa1|3460,Phypa1|7438  
AT3G06150,AT5G19060 Phypa1|25065,Phypa1|20686  
AT4G23010,AT1G12600 Phypa1|26861  
AT3G49680,AT5G65780,AT1G10070,AT1G10060,AT1G50110,AT1G50090,AT3G19710  
Phypa1|38367,Phypa1|37293,Phypa1|14704  
Phypa1|27654  
Phypa1|26731,Phypa1|28500,Phypa1|25752,Phypa1|30677  
AT2G27020 Phypa1|34747,Phypa1|36770  
AT3G22110Phypa1|37380,Phypa1|39141,Phypa1|37788  
AT1G78780 Phypa1|27894  
AT5G51795,AT1G55460 Phypa1|36145  
AT1G06110Phypa1|39549  
AT2G33740 Phypa1|30561  
AT5G27740 Phypa1|36908  
AT5G27380 Phypa1|25519  
AT5G59750,AT5G64300,AT2G22450 Phypa1|34878,Phypa1|33936  
AT4G02280,AT5G49190,AT5G20830,AT3G43190,AT1G73370,AT5G37180  
Phypa1|37142,Phypa1|25506,Phypa1|37898,Phypa1|36955  
AT5G23260,AT1G31140,AT5G20240,AT3G54340,AT2G26320  
Phypa1|1733  
AT1G65360,AT1G01530,AT5G60440,AT4G36590,AT2G24840,AT3G04100,AT3G66656,AT2G34440,AT5G46320,AT1  
G47760,AT1G17310,AT1G72350  
AT3G02310,AT5G15800,AT1G24260,AT2G03710  
AT5G62165,AT2G45660,AT4G11880,AT4G22950,AT5G51860,AT5G51870  
AT3G57230,AT2G22630,AT4G37940,AT2G14210,AT4G09960,AT4G18960,AT2G42830,AT3G58780  
AT1G71692  
Phypa1|2225  
AT3G61120,AT2G45650  
AT3G57390,AT5G13790  
AT5G65050,AT5G65060,AT1G77080,AT5G65080,AT5G65070,AT5G10140,AT1G69120,AT1G26310,AT5G60910,AT3  
G30260  
AT2G22540,AT4G24540  
Phypa1|12815,Phypa1|18252,Phypa1|26417,Phypa1|29001,Phypa1|24140,Phypa1|28600  
AT4G18540 Phypa1|1814  
AT1G51730 Phypa1|29815,Phypa1|35158,Phypa1|15392

AT5G16310,AT1G65650 Phypa1|36096  
AT3G27240,AT5G40810 Phypa1|26579,Phypa1|36663,Phypa1|24451,Phypa1|2717  
AT1G05970 Phypa1|4414,Phypa1|32876  
Phypa1|38057,Phypa1|29693,Phypa1|3527  
AT5G03435,AT3G61720  
AT3G61300,AT4G00700,AT4G11610,AT1G51570,AT3G57880,AT5G12970,AT1G22610,AT5G06850,AT5G48060,AT1G04150  
AT5G44760,AT4G20080  
Phypa1|37146  
Phypa1|20291  
AT3G03680,AT1G74720,AT5G17980  
Phypa1|27839,Phypa1|9815,Phypa1|37848,Phypa1|37849,Phypa1|24094  
AT1G22430,AT4G22110,AT1G22440,AT5G42250  
Phypa1|7118  
Phypa1|26985  
AT1G32780,AT1G64710  
AT5G43940 Phypa1|36702  
AT5G63620 Phypa1|27366  
Phypa1|3068  
Phypa1|31006,Phypa1|30049,Phypa1|31107,Phypa1|31157,Phypa1|31007,Phypa1|34365  
Phypa1|30015  
Phypa1|25590,Phypa1|21805  
AT1G77120  
Phypa1|28197  
AT5G24760 Phypa1|23776  
AT5G14520 Phypa1|5654,Phypa1|1388  
AT1G48270 Phypa1|30626,Phypa1|36831  
AT3G58990,AT2G43100,AT2G43090 Phypa1|2046,Phypa1|2030  
AT3G03210 Phypa1|37504  
AT4G20930 Phypa1|38372  
AT5G10810 Phypa1|39303,Phypa1|39331  
AT5G22350,AT5G06180 Phypa1|11430,Phypa1|27071,Phypa1|12602  
AT3G07370 Phypa1|37755,Phypa1|30175  
AT3G12150 Phypa1|30342  
Phypa1|20529  
AT5G56260,AT3G02770,AT5G16450 Phypa1|28761,Phypa1|39294  
AT1G18560  
Phypa1|19363  
Phypa1|22003  
AT5G53460 Phypa1|38804,Phypa1|36617,Phypa1|27045,Phypa1|27334  
AT5G04140,AT2G41220 Phypa1|36441,Phypa1|37624  
AT2G33840,AT1G28350  
Phypa1|36081  
Phypa1|9499  
AT5G17620 Phypa1|16822  
AT4G00560 Phypa1|31869  
AT3G58390,AT4G27650 Phypa1|2477  
AT2G12550 Phypa1|29933  
AT5G22360 Phypa1|39402,Phypa1|37108,Phypa1|26310  
AT3G54300  
Phypa1|28748  
AT2G25340,AT4G32150,AT5G11150  
AT4G15780,AT3G24890,AT2G32670,AT1G04760,AT2G33110,AT2G33120,AT1G04750  
Phypa1|24100,Phypa1|39374  
Phypa1|38721,Phypa1|37812,Phypa1|39391  
Phypa1|24763  
Phypa1|561,Phypa1|26276  
AT2G27680  
AT5G05680 Phypa1|36562  
AT2G21120,AT4G38730,AT4G09640,AT1G34470,AT1G71900,AT4G13800,AT3G23870  
Phypa1|26229,Phypa1|39255  
AT3G15820,AT3G15830 Phypa1|28538,Phypa1|38672  
AT5G08070,AT5G60970,AT3G02150,AT4G18390,AT1G30210 Phypa1|19655  
AT2G17630,AT4G35630 Phypa1|30013,Phypa1|26980  
AT1G55320 Phypa1|30535,Phypa1|39223  
AT5G23050 Phypa1|38081  
AT5G02080,AT1G12350 Phypa1|32600  
AT4G23100 Phypa1|6358,Phypa1|35841,Phypa1|29372  
AT1G54570,AT5G41120,AT5G41130,AT3G26820,AT3G26840,AT3G02030  
Phypa1|27882,Phypa1|36011,Phypa1|23754,Phypa1|33319,Phypa1|39313  
Phypa1|1596  
Phypa1|1591  
Phypa1|27360  
Phypa1|1199,Phypa1|24286  
AT5G43470,AT5G48620,AT5G35450,AT1G53350,AT1G58400,AT1G58410,AT1G58848,AT1G59218,AT1G58807,AT1G59124,AT1G58602,AT1G58390,AT1G59620,AT1G59780,AT1G50180,AT3G46530,AT3G46730,AT3G46710,AT3G07040,AT3G14460  
Phypa1|31359  
AT1G33560,AT5G04720,AT4G33300,AT3G14470  
Phypa1|33281  
AT4G16095  
AT3G26470

Phypa1|30018  
Phypa1|24349  
Phypa1|38467  
Phypa1|24316  
AT3G50950  
Phypa1|31209  
Phypa1|30104  
AT1G10920  
AT5G38900  
AT5G20920,AT5G01940,AT3G07920 Phypa1|38889,Phypa1|38069,Phypa1|37846,Phypa1|10652  
AT1G22930,AT4G09150 Phypa1|27644,Phypa1|37069  
AT5G03750,AT5G03450 Phypa1|18431  
AT2G30980,AT1G06390,AT4G18710,AT1G57870,AT1G09840,AT4G00720,AT3G61160,AT5G26751,AT3G05840,AT5  
G14640 Phypa1|37909,Phypa1|37910,Phypa1|38659,Phypa1|33089,Phypa1|23809,Phypa1|38764,Phypa1|3036  
AT3G23540,AT4G14290,AT4G17150 Phypa1|29634,Phypa1|27811  
Phypa1|9259  
Phypa1|3706,Phypa1|38012,Phypa1|39518,Phypa1|24895,Phypa1|36286,Phypa1|36634  
AT1G20380,AT1G76140  
AT2G19160,AT4G30060,AT5G57270,AT4G25870,AT4G31350 Phypa1|29530,Phypa1|25911,Phypa1|27558  
Phypa1|37420,Phypa1|27031,Phypa1|25163,Phypa1|25591  
AT5G16170,AT1G10880  
AT1G11940,AT1G62305  
Phypa1|20242  
Phypa1|25984,Phypa1|1034,Phypa1|29603,Phypa1|30396  
AT5G25970,AT5G11730,AT1G51770,AT3G21310 Phypa1|29601  
AT3G52060,AT5G22070,AT4G32290,AT5G25330  
Phypa1|129,Phypa1|25194,Phypa1|19961,Phypa1|1895,Phypa1|2268  
AT1G68380,AT1G68390,AT1G73810  
AT5G14550 Phypa1|25104,Phypa1|29323,Phypa1|38023,Phypa1|536,Phypa1|25675  
AT5G25990,AT1G10280  
AT3G29200,AT1G69370,AT5G10870 Phypa1|36482,Phypa1|28196  
AT5G62810 Phypa1|19960,Phypa1|35133,Phypa1|35372  
Phypa1|2265,Phypa1|1870  
AT4G09200,AT4G09310,AT4G09250 Phypa1|34695,Phypa1|17821  
AT1G35470,AT4G09340  
AT3G04510,AT5G28490,AT1G07090,AT5G58500,AT2G42610,AT1G16910,AT1G78815,AT4G18610,AT2G31160  
Phypa1|2113  
AT3G23290 Phypa1|2314  
Phypa1|2118  
Phypa1|2329  
AT1G54470,AT1G11540,AT1G61740,AT4G21260,AT4G21250,AT2G36630,AT2G25737  
Phypa1|30549,Phypa1|26406,Phypa1|537  
Phypa1|28789,Phypa1|34736  
AT1G75330  
Phypa1|31286,Phypa1|31069  
AT1G67420 Phypa1|34019  
AT4G14385 Phypa1|28685,Phypa1|38031  
AT3G45830 Phypa1|9787,Phypa1|33268  
AT3G07460,AT3G07470,AT5G16380,AT5G54530,AT1G61667,AT1G55265,AT5G19860  
Phypa1|1537,Phypa1|26534  
AT3G18290,AT1G74770,AT1G18920,AT1G74760,AT1G18910 Phypa1|26956  
AT3G04090,AT5G18290 Phypa1|38134,Phypa1|24481  
Phypa1|31253  
AT1G54310 Phypa1|39591  
AT1G65220,AT5G36230 Phypa1|24023,Phypa1|36324,Phypa1|39782  
AT3G04280,AT5G26594 Phypa1|1665,Phypa1|1666,Phypa1|2373  
AT5G53490 Phypa1|29990  
AT1G57610,AT1G09575 Phypa1|1490,Phypa1|1999,Phypa1|1998  
AT5G05520,AT3G11070 Phypa1|39545,Phypa1|25185  
AT1G73655,AT1G18170 Phypa1|8702,Phypa1|25091  
AT2G47600 Phypa1|955,Phypa1|28502  
AT1G56290 Phypa1|27790  
AT2G21980,AT2G41350 Phypa1|29419  
AT1G09815 Phypa1|319  
AT1G71860 Phypa1|3247,Phypa1|28731  
Phypa1|29614  
AT3G07130,AT2G32770  
Phypa1|31465  
AT3G52810,AT3G52820  
AT4G13700 Phypa1|37017  
Phypa1|30548,Phypa1|37425,Phypa1|28131  
AT3G20500 Phypa1|28083,Phypa1|36519,Phypa1|14386,Phypa1|24823  
AT3G52780  
Phypa1|31400  
AT5G48440  
Phypa1|16627,Phypa1|25889  
AT3G59770 Phypa1|28088  
AT5G55600,AT3G25855,AT1G68580 Phypa1|29289,Phypa1|25697  
AT4G21130,AT4G05410 Phypa1|964,Phypa1|39351  
AT1G10170 Phypa1|37644  
AT5G05660 Phypa1|28085  
AT4G21560,AT4G05000 Phypa1|23834,Phypa1|36333



AT1G73885 Phypa1|35479  
AT4G02580 Phypa1|23870,Phypa1|36377  
AT2G01290,AT1G71100  
AT5G44520  
Phypa1|31451  
Phypa1|29511,Phypa1|38263  
AT3G04790 Phypa1|27602,Phypa1|39371  
Phypa1|31441  
Phypa1|39517,Phypa1|29274  
AT5G56090 Phypa1|29918  
AT5G08420 Phypa1|27491  
AT5G66160  
AT1G35625,AT1G35630,AT4G09560,AT1G71980,AT1G22670  
Phypa1|27044,Phypa1|38858,Phypa1|18595,Phypa1|25511,Phypa1|614  
AT5G07225 Phypa1|29725,Phypa1|25313  
AT1G02020 Phypa1|928  
AT1G56560,AT3G05820,AT3G06500  
Phypa1|29383  
AT4G34860  
AT1G22650,AT1G72000,AT1G35580,AT4G09510  
Phypa1|30134,Phypa1|29222,Phypa1|38438,Phypa1|39472  
AT5G22510 Phypa1|949,Phypa1|38260,Phypa1|1801  
AT3G48330  
AT5G50240 Phypa1|2437,Phypa1|23956,Phypa1|36590,Phypa1|2642,Phypa1|2613,Phypa1|35752  
Phypa1|7047,Phypa1|38427  
AT1G54160,AT3G14020,AT1G72830,AT1G17590,AT2G34720,AT1G30500,AT5G06510,AT3G05690,AT5G12840,AT3  
G20910 Phypa1|32679,Phypa1|32370  
AT4G24175 Phypa1|9671,Phypa1|7661  
AT1G69800 Phypa1|25061  
AT3G48530  
Phypa1|30519,Phypa1|25409  
Phypa1|2976,Phypa1|2540  
AT1G17410 Phypa1|24649,Phypa1|16832  
AT4G09320 Phypa1|34280,Phypa1|37418,Phypa1|28522  
Phypa1|10134  
AT4G23900,AT4G11010  
AT5G63310 Phypa1|24619,Phypa1|26439  
AT1G25440,AT1G68520  
AT1G49130  
Phypa1|27642  
Phypa1|28917  
AT1G73870 Phypa1|24492  
Phypa1|24928  
AT1G07050 Phypa1|32389  
AT5G52350  
AT1G07725,AT2G28640,AT2G28650,AT5G59730,AT3G09530,AT3G09520,AT3G55150,AT2G39380  
AT5G50380  
Phypa1|20123  
AT5G03540,AT5G52340 Phypa1|38657,Phypa1|32501,Phypa1|32582  
AT1G54090,AT3G14090,AT1G72470  
Phypa1|28678,Phypa1|456,Phypa1|1778,Phypa1|1371,Phypa1|37693,Phypa1|36748  
AT5G58430,AT1G07000,AT5G13990,AT5G13150  
AT4G31540,AT1G51640 Phypa1|33645,Phypa1|36398,Phypa1|24636,Phypa1|33423  
Phypa1|24925  
AT3G29400,AT5G61010  
AT3G11320,AT5G05820 Phypa1|39574,Phypa1|38808  
AT1G77610,AT1G21870 Phypa1|24662,Phypa1|38660  
AT1G12500  
AT3G10290,AT5G04160  
AT2G23380,AT4G02020,AT1G02580 Phypa1|37011  
AT4G27010,AT1G72270 Phypa1|5694  
AT2G39910 Phypa1|34938  
AT2G23070  
Phypa1|36684,Phypa1|39214  
AT3G50000,AT2G23080,AT5G67380 Phypa1|28524,Phypa1|29245  
AT5G02410 Phypa1|29736  
AT5G23030,AT1G18520  
AT4G30430,AT2G23810,AT4G28050 Phypa1|28809,Phypa1|2991,Phypa1|32108,Phypa1|35924  
AT1G63260 Phypa1|18725,Phypa1|35233,Phypa1|23771  
AT2G19580,AT5G46700  
AT5G57810,AT2G01960,AT2G03840  
AT3G12090,AT4G23410,AT5G60220,AT3G45600  
AT4G24440 Phypa1|27552,Phypa1|36276  
AT5G04920 Phypa1|30151  
AT4G13720 Phypa1|36859  
AT4G04780,AT1G33450,AT5G15690 Phypa1|38674  
AT5G37130,AT5G17270 Phypa1|27181  
AT4G33540 Phypa1|36044  
AT5G48830 Phypa1|31990  
AT5G27720 Phypa1|25851,Phypa1|25513  
AT1G50020  
Phypa1|17065,Phypa1|17064,Phypa1|3060

AT3G22960 Phypa1|26777,Phypa1|29730,Phypa1|37967  
     Phypa1|255  
     Phypa1|27739  
 AT5G56350,AT4G26390,AT3G55810,AT3G55650,AT3G25960,AT3G04050,AT5G08570,AT5G63680  
     Phypa1|35654,Phypa1|37168,Phypa1|36931,Phypa1|27264,Phypa1|34585  
 AT1G32440,AT5G52920 Phypa1|24076,Phypa1|34668  
     Phypa1|3108,Phypa1|30496  
 AT2G36580,AT3G52990 Phypa1|24128,Phypa1|31797,Phypa1|39226  
 AT3G50670 Phypa1|30122,Phypa1|26046  
 AT2G03200  
     Phypa1|17393,Phypa1|8492  
 AT1G01300,AT3G61820 Phypa1|25821,Phypa1|25454,Phypa1|99  
     Phypa1|1579  
 AT5G43100 Phypa1|429,Phypa1|36397  
 AT3G12700  
     Phypa1|21047  
 AT4G04985  
 AT3G20015  
 AT2G42980,AT3G59080  
 AT1G31450,AT2G35615,AT5G33340,AT1G64830,AT2G28010,AT2G28030,AT2G28220,AT2G28040,AT2G23945,AT4  
 G30040,AT4G30030,AT4G12920  
 AT2G36670,AT5G22850,AT1G08210,AT3G42550 Phypa1|26594,Phypa1|39673,Phypa1|28525  
     Phypa1|25157,Phypa1|28650,Phypa1|11803,Phypa1|24635,Phypa1|499,Phypa1|29952,Phypa1|28420,Ph  
 ypa1|26909  
 AT5G45120,AT4G16563,AT3G52500  
 AT3G25700 Phypa1|38166,Phypa1|37789,Phypa1|25897  
     Phypa1|3984  
 AT3G50050  
 AT5G24820  
 AT3G18490,AT1G25510  
 AT1G05840,AT3G02740,AT1G65240,AT5G36260  
     Phypa1|11184  
 AT1G79720,AT5G10760,AT5G10770,AT5G07030,AT3G54400,AT1G09750,AT5G02190,AT2G39710,AT5G37540,AT1  
 G66180  
 AT1G71730 Phypa1|2193  
 AT1G35170,AT1G35180,AT1G45010 Phypa1|26055  
 AT5G27730,AT5G47900 Phypa1|25289,Phypa1|27931  
 AT2G20420 Phypa1|23691  
 AT4G21530 Phypa1|34347  
 AT4G16130,AT3G42850 Phypa1|36108,Phypa1|24098  
 AT3G53390,AT2G37160 Phypa1|39275  
 AT1G32200 Phypa1|39096  
 AT5G53040,AT4G35590,AT1G18790,AT1G74480,AT5G66990 Phypa1|22403  
 AT3G28720 Phypa1|19460,Phypa1|30137  
 AT2G47980 Phypa1|28904  
 AT4G09965,AT2G47010,AT1G17030 Phypa1|38169  
 AT2G35210,AT5G46750,AT4G17890 Phypa1|94,Phypa1|26092  
 AT4G27600 Phypa1|26762,Phypa1|38723,Phypa1|29192  
 AT2G41640,AT3G57380,AT3G10320,AT3G18170,AT3G18180,AT2G03370,AT2G03360  
     Phypa1|38529,Phypa1|30116  
 AT3G07050 Phypa1|477,Phypa1|28226  
 AT1G15980 Phypa1|23841,Phypa1|38864  
 AT3G06610 Phypa1|37783  
 AT3G15140 Phypa1|39507  
 AT5G37830 Phypa1|35826  
 AT2G26970 Phypa1|2587,Phypa1|38933  
 AT3G17900 Phypa1|34086  
 AT2G42750 Phypa1|1074,Phypa1|1994  
 AT5G63980,AT5G64000,AT5G09290,AT5G63990 Phypa1|27077  
 AT5G54390 Phypa1|37390,Phypa1|32813  
 AT4G05090 Phypa1|550  
     Phypa1|29923  
 AT2G04940 Phypa1|25370  
 AT1G15060,AT1G73750 Phypa1|437,Phypa1|27732  
 AT3G43490,AT3G43590,AT5G36240 Phypa1|1197  
 AT2G32080 Phypa1|6138,Phypa1|36364  
     Phypa1|6009  
 AT5G10320 Phypa1|30890  
 AT5G05970 Phypa1|28066,Phypa1|24321,Phypa1|4031,Phypa1|33709  
 AT5G07270,AT5G57740 Phypa1|943,Phypa1|38628,Phypa1|29470  
 AT4G00290,AT4G00234 Phypa1|205,Phypa1|29950,Phypa1|38712,Phypa1|37592,Phypa1|29951  
     Phypa1|28476,Phypa1|17007  
     Phypa1|24834  
 AT1G17650  
     Phypa1|3089  
 AT3G25530 Phypa1|38104  
 AT4G04200,AT2G39960 Phypa1|33690,Phypa1|39725  
 AT1G16210 Phypa1|35807,Phypa1|23779  
 AT1G52980 Phypa1|1397  
 AT3G62130,AT5G26600 Phypa1|36077,Phypa1|1374  
 AT4G22300 Phypa1|28792  
 AT1G54520 Phypa1|27245,Phypa1|28308

AT1G28260  
AT5G02650 Phypa1|32254  
AT5G19400 Phypa1|10562,Phypa1|19199  
AT3G26085 Phypa1|24078  
AT5G16550 Phypa1|11946,Phypa1|33542,Phypa1|35124  
AT4G01590,AT4G35680 Phypa1|32611  
AT4G17430 Phypa1|1830  
AT2G34940,AT1G30900,AT4G20110,AT3G52850,AT2G30290,AT2G14720,AT2G14740  
Phypa1|25970,Phypa1|25976,Phypa1|1375,Phypa1|26935,Phypa1|28918,Phypa1|21279,Phypa1|24406,Phypa1|29208  
AT1G50710 Phypa1|38936  
AT2G01580,AT5G05950,AT3G46890,AT3G07510 Phypa1|29312,Phypa1|28961  
AT3G04600 Phypa1|25332  
AT5G21990 Phypa1|33426  
AT5G11620Phypa1|32602  
AT5G08565,AT5G63670 Phypa1|26940  
AT5G24710 Phypa1|38394  
AT5G42190,AT1G75950  
Phypa1|26845,Phypa1|832  
AT3G53060,AT2G25700,AT1G20140,AT3G60020,AT4G34470,AT4G34210,AT3G60010,AT3G21850,AT3G21860,AT3G21840,AT3G21830,AT2G03160,AT3G25650,AT1G10230,AT2G20160,AT2G03190,AT2G03170  
Phypa1|2635,Phypa1|31708,Phypa1|23678,Phypa1|23797,Phypa1|6332  
Phypa1|831  
AT4G14320,AT3G23390 Phypa1|23908,Phypa1|36204,Phypa1|26880,Phypa1|35965,Phypa1|24117  
AT4G26740,AT5G55240,AT5G29560,AT2G33380 Phypa1|29019,Phypa1|26960,Phypa1|26447  
AT4G13330 Phypa1|33230  
AT1G70680,AT1G70670,AT1G23250,AT1G23240  
AT5G14660 Phypa1|29577  
Phypa1|31378,Phypa1|30774  
Phypa1|31126  
AT2G19830,AT4G29160 Phypa1|39017  
AT4G21830,AT4G21840,AT4G21850,AT4G04840  
AT4G04800 Phypa1|39130,Phypa1|2980  
AT4G04810,AT4G04830,AT4G21860  
Phypa1|29976  
AT1G53670  
AT2G44510,AT5G03830 Phypa1|39221  
AT5G05510 Phypa1|18405  
AT5G55390,AT5G48090,AT5G48080 Phypa1|35363  
AT1G34020,AT4G09810,AT4G39390  
AT1G21070,AT1G76670,AT5G42420  
Phypa1|25058,Phypa1|26379,Phypa1|26392,Phypa1|25073,Phypa1|26005,Phypa1|12673  
AT2G30460,AT1G06890 Phypa1|27897,Phypa1|29912  
AT2G28315,AT5G57100,AT5G55950  
AT4G01940 Phypa1|693  
AT2G34840,AT1G30630 Phypa1|34574,Phypa1|38617,Phypa1|36075  
AT2G28910 Phypa1|36670  
AT3G60210,AT2G44650 Phypa1|17971,Phypa1|30199  
AT1G44960 Phypa1|29455  
AT5G24520 Phypa1|2899,Phypa1|15486  
AT1G12910,AT3G26640 Phypa1|27321,Phypa1|37869  
AT1G06590 Phypa1|410  
AT3G48200 Phypa1|25557,Phypa1|27260,Phypa1|33075  
AT3G21550,AT3G21520,AT5G39650,AT1G09157,AT4G28485,AT5G27370,AT5G46090,AT4G18425,AT3G02430,AT4G24310 Phypa1|24596  
AT1G29260 Phypa1|27900,Phypa1|39678  
Phypa1|21361  
AT2G27810 Phypa1|24584,Phypa1|37288,Phypa1|26196  
AT5G25420,AT1G65550,AT1G49960,AT1G60030,AT1G10540,AT5G62890,AT5G49990,AT2G34190,AT2G05760,AT2G26510 Phypa1|2905,Phypa1|39548,Phypa1|37313,Phypa1|39133,Phypa1|39132,Phypa1|37698,Phypa1|27211  
AT4G38050  
AT1G26820,AT1G14220,AT1G14210,AT2G02990,AT2G39780 Phypa1|26505,Phypa1|30264  
AT2G22260 Phypa1|28741  
AT5G54680,AT1G51070,AT3G23210,AT4G14410 Phypa1|37760,Phypa1|4736,Phypa1|29238  
AT3G52190 Phypa1|32172,Phypa1|24611  
AT5G50550,AT5G50650,AT2G01470 Phypa1|30700,Phypa1|39202  
AT1G36240,AT3G18740,AT1G77940  
Phypa1|38244,Phypa1|38532,Phypa1|36522,Phypa1|36942,Phypa1|27595  
AT5G57970,AT1G15970,AT1G80850,AT1G75090,AT1G13635,AT5G44680,AT3G12710  
Phypa1|245,Phypa1|1148  
AT3G60840  
AT1G14690,AT2G01910  
Phypa1|28365,Phypa1|28095,Phypa1|4508,Phypa1|464,Phypa1|24879,Phypa1|28094  
AT1G27920,AT4G26760,AT5G55230,AT2G38720  
AT2G30115  
AT5G51600,AT5G62250  
Phypa1|12827  
AT2G25680,AT1G80310 Phypa1|30161,Phypa1|38317  
AT5G49500,AT1G48900,AT1G15310,AT5G66970 Phypa1|4102,Phypa1|32189  
AT3G27620,AT3G22360,AT3G22370,AT1G32350,AT5G64210 Phypa1|15608  
Phypa1|30920  
Phypa1|38843

AT4G14930 Phypa1|156,Phypa1|1971  
AT1G72880  
AT1G67370 Phypa1|26022  
AT1G30580 Phypa1|39337  
AT1G56050 Phypa1|2645  
AT1G02300,AT1G02305,AT4G01610 Phypa1|38803,Phypa1|38641,Phypa1|23679  
AT4G03240 Phypa1|293  
AT1G26840 Phypa1|3206,Phypa1|27621  
AT5G53090,AT5G53100,AT4G27760 Phypa1|27484,Phypa1|32581  
AT3G52860 Phypa1|34142  
AT3G05390  
AT4G01240 Phypa1|37680,Phypa1|26178,Phypa1|24964  
AT5G40830,AT3G27230,AT1G29790  
Phypa1|36960  
AT4G15080,AT3G22180,AT2G33640 Phypa1|37130,Phypa1|27372,Phypa1|31878,Phypa1|36692  
AT1G69420 Phypa1|11527,Phypa1|38486,Phypa1|32195  
AT4G01730  
AT4G28660 Phypa1|2716,Phypa1|3001  
AT5G09830 Phypa1|1284  
AT3G53520,AT2G47650,AT3G62830 Phypa1|37141,Phypa1|39340,Phypa1|33873,Phypa1|36651  
AT3G46440,AT5G59290,AT2G28760 Phypa1|37525  
AT2G28755 Phypa1|30729,Phypa1|31066  
AT2G38130 Phypa1|25498,Phypa1|244  
AT1G50030 Phypa1|35794  
Phypa1|26274,Phypa1|38801  
AT3G09470 Phypa1|36348  
AT2G46520 Phypa1|13170,Phypa1|36578  
AT3G05625 Phypa1|38015  
AT3G63010,AT5G27320,AT3G05120  
AT5G06570  
AT5G23530 Phypa1|25881,Phypa1|25406,Phypa1|25679,Phypa1|27293  
AT5G16080,AT1G68620 Phypa1|29821  
Phypa1|1560  
Phypa1|23539  
Phypa1|2294,Phypa1|31191,Phypa1|25854,Phypa1|30048  
AT1G47480  
AT5G62180,AT2G45610,AT2G45600  
AT1G49650,AT1G49660,AT1G49640,AT3G48700,AT3G48690,AT2G03550,AT1G19190  
AT3G04650 Phypa1|13895,Phypa1|25445  
AT5G57950 Phypa1|25057,Phypa1|25771  
AT1G34370 Phypa1|705,Phypa1|1140  
Phypa1|1139  
AT5G20520 Phypa1|38934  
Phypa1|22917  
AT3G12370  
AT5G13510 Phypa1|36816,Phypa1|37578,Phypa1|32596  
AT2G26360,AT2G35800 Phypa1|36658,Phypa1|910  
AT2G44760 Phypa1|32663  
AT3G12760 Phypa1|20251  
AT4G04350 Phypa1|22465,Phypa1|26922  
AT2G28390 Phypa1|38627,Phypa1|30748  
AT3G54210 Phypa1|26907,Phypa1|27284,Phypa1|25859  
AT5G13030 Phypa1|39324  
Phypa1|6468  
AT3G27330,AT5G40720,AT1G27200 Phypa1|30129,Phypa1|37322,Phypa1|632,Phypa1|2887  
AT4G37420  
AT3G05675,AT4G10800 Phypa1|13569,Phypa1|30067,Phypa1|26230,Phypa1|14366  
AT3G25920 Phypa1|1110,Phypa1|29045,Phypa1|24811,Phypa1|1113  
AT5G40500 Phypa1|26157  
AT1G13160,AT4G31520 Phypa1|29749  
AT3G18100 Phypa1|459  
AT2G37410,AT1G20350,AT5G11690 Phypa1|37897  
AT5G57500 Phypa1|1995,Phypa1|1997  
AT5G38630,AT1G26100,AT1G14730,AT4G25570 Phypa1|39280,Phypa1|39344  
AT3G54690 Phypa1|5064,Phypa1|28578,Phypa1|29799  
AT1G03780,AT5G44270 Phypa1|12084,Phypa1|31924  
Phypa1|7191,Phypa1|26286,Phypa1|28675,Phypa1|25199,Phypa1|38047  
AT1G62660,AT1G12240 Phypa1|2950,Phypa1|23839,Phypa1|17458,Phypa1|24104  
AT3G13790,AT3G13784,AT1G55120,AT5G11920,AT3G52600,AT2G36190 Phypa1|17459  
AT1G65030 Phypa1|28037  
AT1G02260 Phypa1|36596,Phypa1|37370,Phypa1|28382  
Phypa1|21187  
AT1G60230 Phypa1|32655  
AT2G39670 Phypa1|1910,Phypa1|29880  
AT3G19630 Phypa1|39235  
Phypa1|30769  
AT4G02405 Phypa1|2549  
AT5G23340 Phypa1|38644  
Phypa1|20239  
AT5G27920  
AT5G40470 Phypa1|35181  
AT3G58530 Phypa1|27067

AT2G36370 Phypa1|34088  
 AT1G80630  
 AT5G01720 Phypa1|29533,Phypa1|36983  
 AT1G14490,AT5G49700,AT4G17800,AT2G35270,AT4G35390,AT1G76500,AT1G20900,AT4G22810,AT4G12050,AT3G60870,AT2G45430,AT2G42940,AT3G55560,AT4G14465,AT3G04570  
 Phypa1|653,Phypa1|651,Phypa1|1102,Phypa1|2045  
 Phypa1|1545,Phypa1|2079  
 AT1G68720 Phypa1|6461  
 Phypa1|29858  
 AT5G49650 Phypa1|28797,Phypa1|39747  
 AT3G13226 Phypa1|15203  
 AT2G24990,AT5G37350 Phypa1|28815  
 AT5G12330,AT4G36260,AT2G18120,AT5G33210,AT3G51060,AT5G66350,AT1G19790,AT1G75520,AT2G21400,AT3G54430 Phypa1|38310,Phypa1|39656  
 AT1G26665,AT5G41910 Phypa1|33425  
 AT3G59980  
 AT2G40660 Phypa1|36716  
 Phypa1|32766  
 AT4G13780 Phypa1|3376,Phypa1|23903  
 Phypa1|2043  
 AT5G02680  
 AT1G12520 Phypa1|38313,Phypa1|30699  
 Phypa1|1590  
 Phypa1|30792  
 AT1G53020,AT3G15355  
 AT3G12775  
 AT2G33770  
 AT2G16920 Phypa1|27102,Phypa1|1751  
 AT1G55370 Phypa1|33537  
 AT3G56450,AT3G56190 Phypa1|31806,Phypa1|2501,Phypa1|34567,Phypa1|28286  
 AT1G52600,AT3G15710 Phypa1|38584,Phypa1|34099  
 AT1G75230,AT1G19480,AT3G50880 Phypa1|39135,Phypa1|2007,Phypa1|22285  
 AT3G60740 Phypa1|35196  
 Phypa1|35652  
 Phypa1|10505  
 AT5G64310,AT1G35230  
 AT4G37470 Phypa1|38976,Phypa1|39006,Phypa1|38855,Phypa1|37350,Phypa1|3017  
 Phypa1|23325  
 Phypa1|16265,Phypa1|11258,Phypa1|36797,Phypa1|2748,Phypa1|32694  
 AT3G24420 Phypa1|28772,Phypa1|24681,Phypa1|39534  
 AT3G03990  
 AT5G33290,AT3G42180,AT5G20260,AT5G11130  
 Phypa1|19105  
 AT5G03795  
 Phypa1|19139,Phypa1|29872  
 Phypa1|15164,Phypa1|4169,Phypa1|1919  
 AT5G25310 Phypa1|27316,Phypa1|27318  
 AT4G16745,AT5G19670,AT4G32790,AT5G25820,AT5G37000,AT5G11610  
 Phypa1|27697,Phypa1|19980,Phypa1|29897  
 AT3G07620  
 AT4G38040 Phypa1|2647  
 AT4G02620 Phypa1|38596,Phypa1|38248  
 AT2G06010 Phypa1|29593,Phypa1|39430  
 AT5G14600 Phypa1|23719  
 AT3G21580 Phypa1|38271  
 AT1G79150,AT1G79140 Phypa1|26892  
 AT5G57860 Phypa1|37452  
 AT4G32870,AT2G25770 Phypa1|9200,Phypa1|32386  
 AT3G06270,AT2G20050 Phypa1|36912,Phypa1|36851,Phypa1|986  
 AT2G45640 Phypa1|26770  
 AT3G49910,AT5G67510  
 Phypa1|25597,Phypa1|27844,Phypa1|26759,Phypa1|33056,Phypa1|4704,Phypa1|28434,Phypa1|2658  
 AT3G46220 Phypa1|39521  
 AT3G53680,AT2G37520,AT2G27980,AT2G36720 Phypa1|32860,Phypa1|35715  
 AT4G16570 Phypa1|30650  
 AT3G15110Phypa1|37159  
 Phypa1|30817  
 AT5G08110Phypa1|25360  
 AT1G50400,AT3G20000 Phypa1|24469,Phypa1|24918,Phypa1|38036  
 Phypa1|30503  
 Phypa1|21364  
 AT5G52810 Phypa1|169  
 AT4G04330 Phypa1|27220  
 AT4G10170,AT1G33480 Phypa1|36007  
 AT5G55510,AT4G26670 Phypa1|704,Phypa1|1155  
 AT3G53910 Phypa1|15771  
 AT3G47520 Phypa1|27006,Phypa1|25469  
 AT1G53240,AT3G15020 Phypa1|27287,Phypa1|28928,Phypa1|27875  
 AT2G22780,AT5G09660 Phypa1|38510,Phypa1|32608  
 AT1G60960,AT1G10970,AT4G33020,AT3G12750,AT5G62160,AT2G04032,AT1G31260,AT5G45105,AT4G19690,AT4G19680,AT2G32270,AT1G05300,AT2G30080 Phypa1|24197,Phypa1|4852,Phypa1|5405,Phypa1|28403

AT3G19490,AT1G49810           Phypa1|2987,Phypa1|34996  
AT1G77110           Phypa1|27015  
AT1G73590,AT1G23080,AT1G70940,AT2G01420,AT5G57090,AT5G15100  
                  Phypa1|38213,Phypa1|25197,Phypa1|6695  
AT5G16530           Phypa1|20738  
AT3G24506,AT2G17240           Phypa1|4107  
                  Phypa1|2579  
AT1G20330,AT1G76090           Phypa1|14186,Phypa1|28963,Phypa1|2865,Phypa1|22586  
AT1G48580           Phypa1|32808
