# Supplementary material
Source: PubMed Central journal article supplement (PMC2556807)
Supplement: pp.108.122457_8.pdf [file pp.108.122457_8.pdf]

**Supplemental Figure 1**

**GeneOntology (GO) functional categories with over-represented number of genes in the *A. thaliana* lineage of three types of OGs (A-M, A-R, and A-P)**

Cellular components

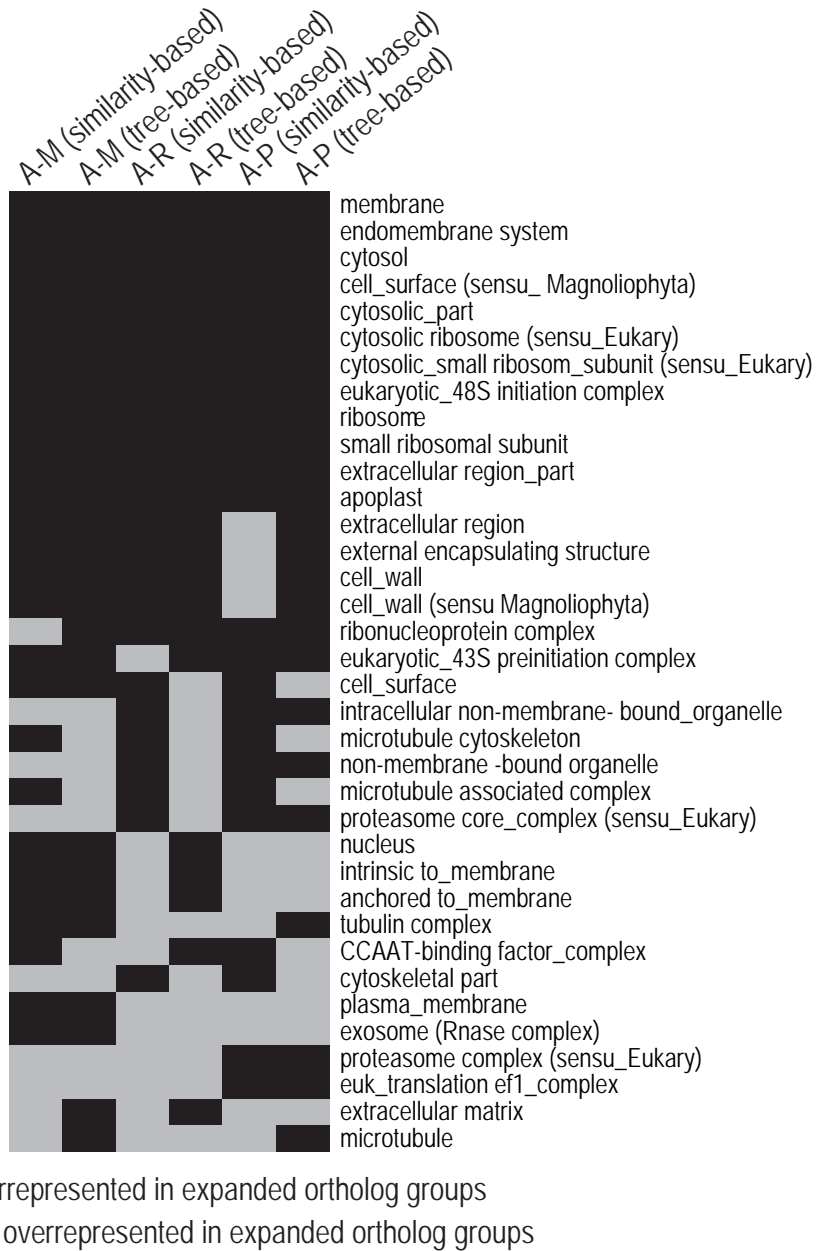

Molecular function

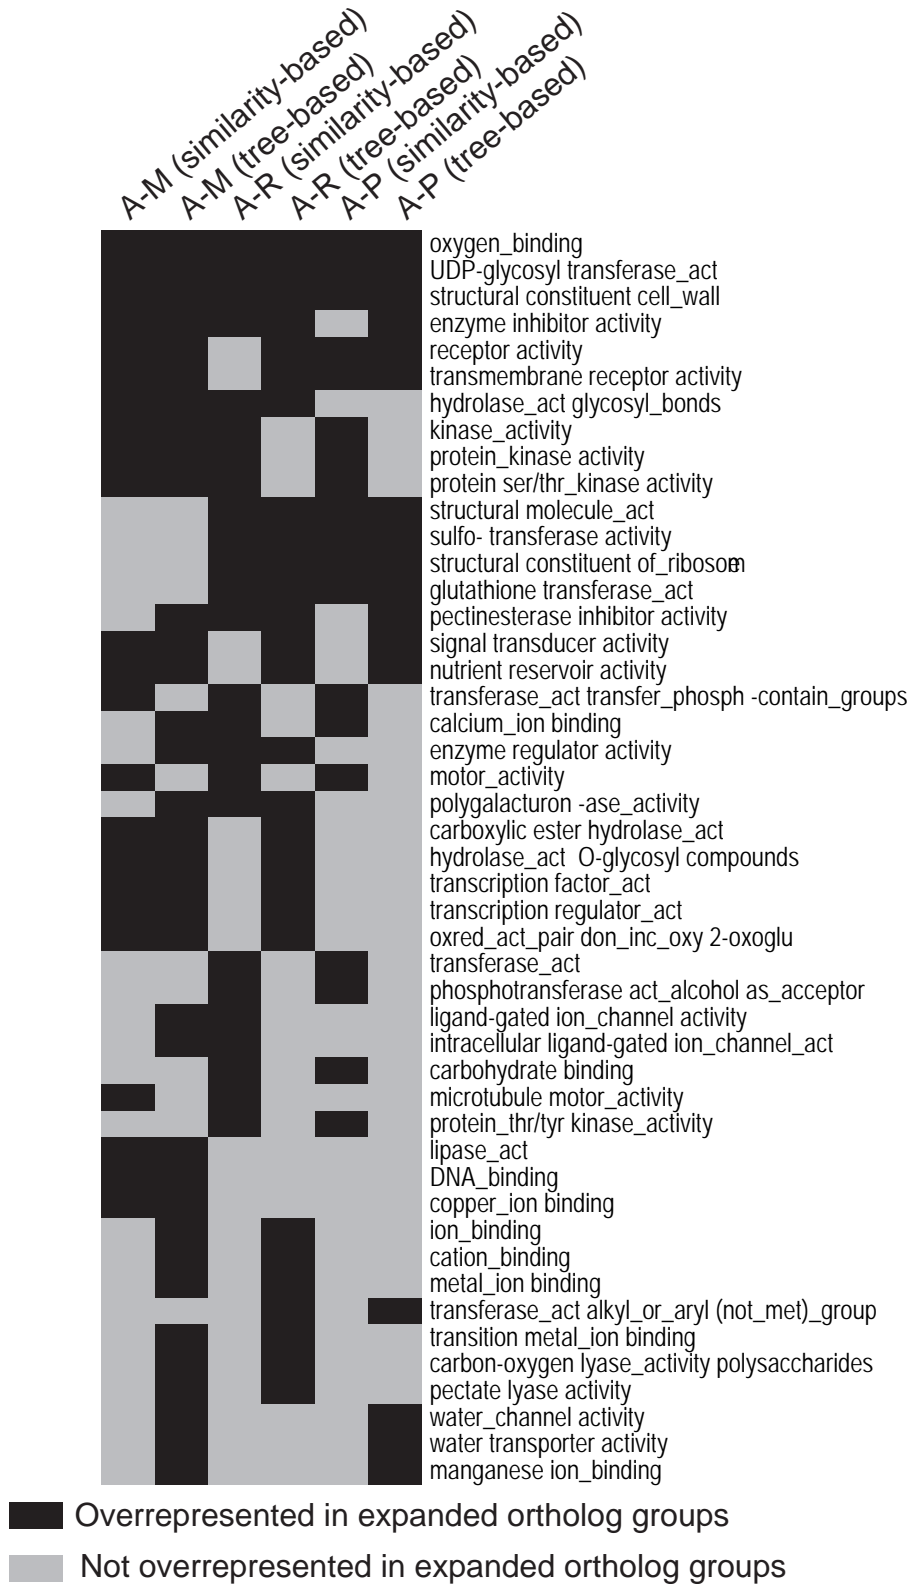

Biological process

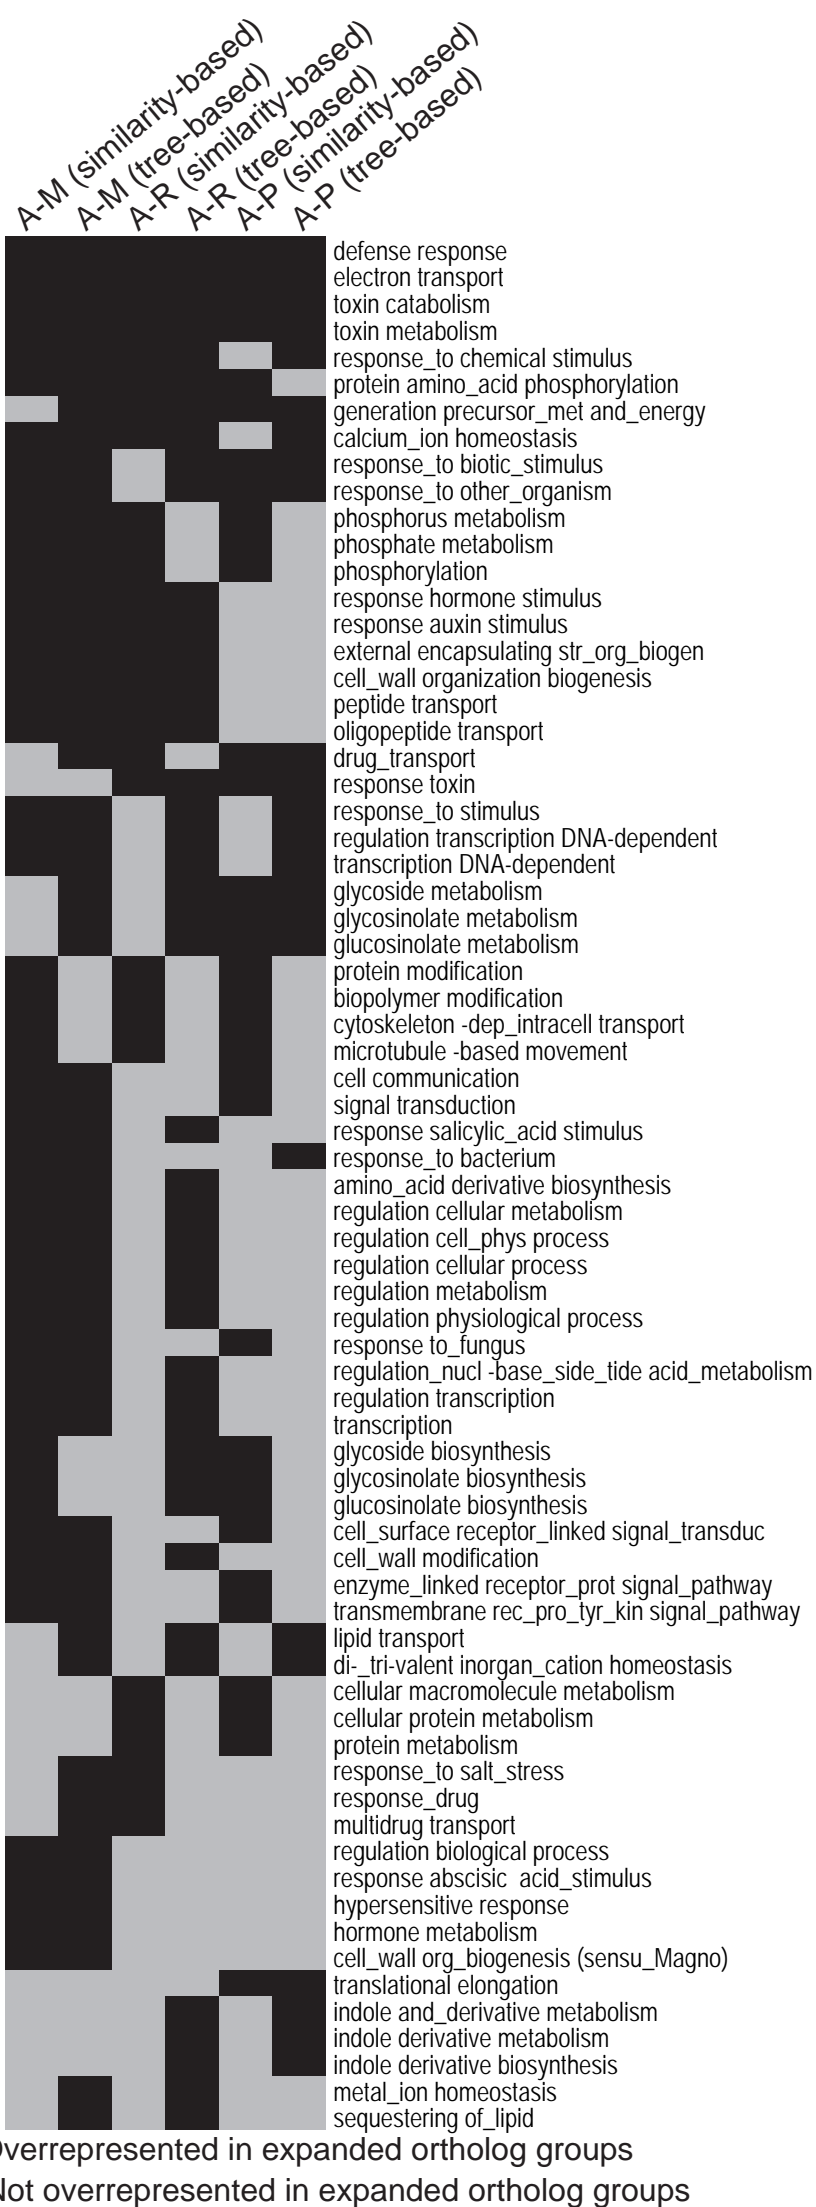

Overrepresented in expanded ortholog groups  
 Not overrepresented in expanded ortholog groups
