# Supplementary material
Source: PubMed Central journal article supplement (PMC2556807)
Supplement: pp.108.122457_10.pdf [file pp.108.122457_10.pdf]

### Supplemental Figure 3

## GeneOntology (GO) functional categories with over-represented numbers of genes in expanded via tandem or non-tandem mechanisms in the *A. thaliana* lineage

The brief GO category descriptions are shown. The arrowheads point to subcategories. Categories with significantly (False positive rate < 0.05) more genes duplicated via tandem and non-tandem mechanisms are shown in red and blue circles, respectively.

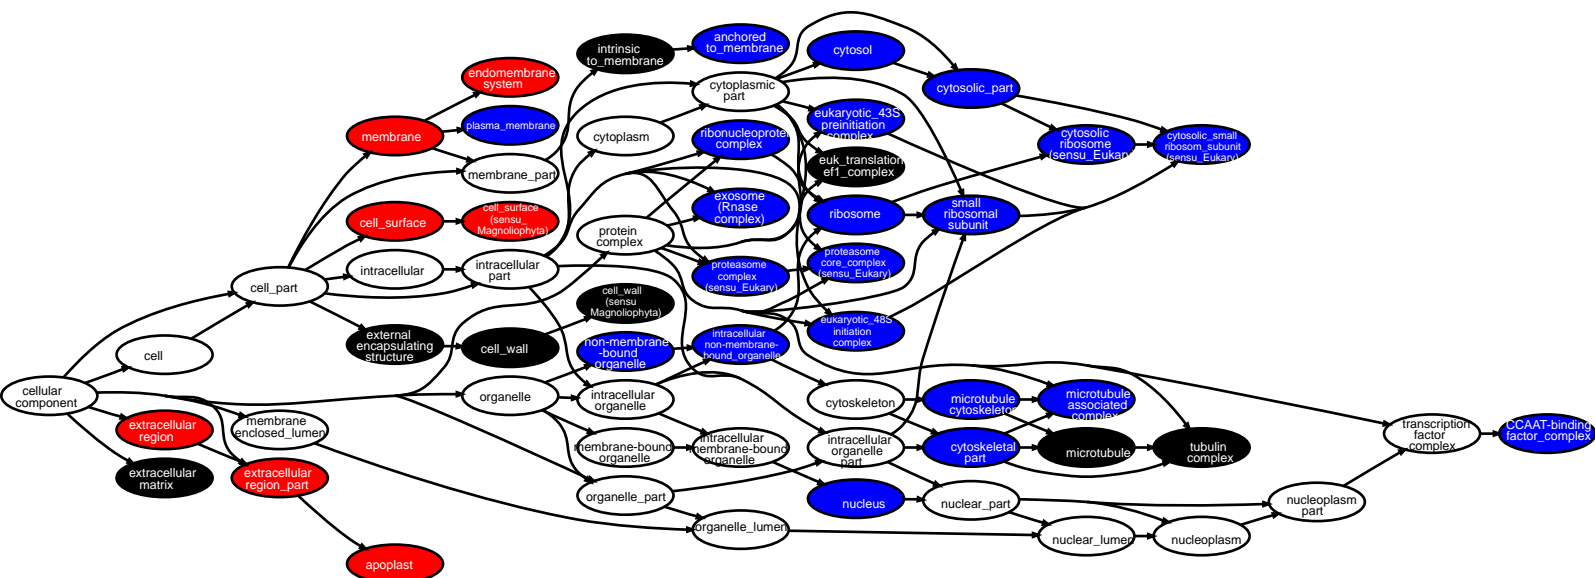

-  Overrepresented in expanded OGs and overrepresented in tandem duplicates
-  Overrepresented in expanded OGs and overrepresented in non-tandemly duplicates
-  Overrepresented in expanded OGs but not overrepresented in either type of duplicates

Overrepresented functional categories in cellular components

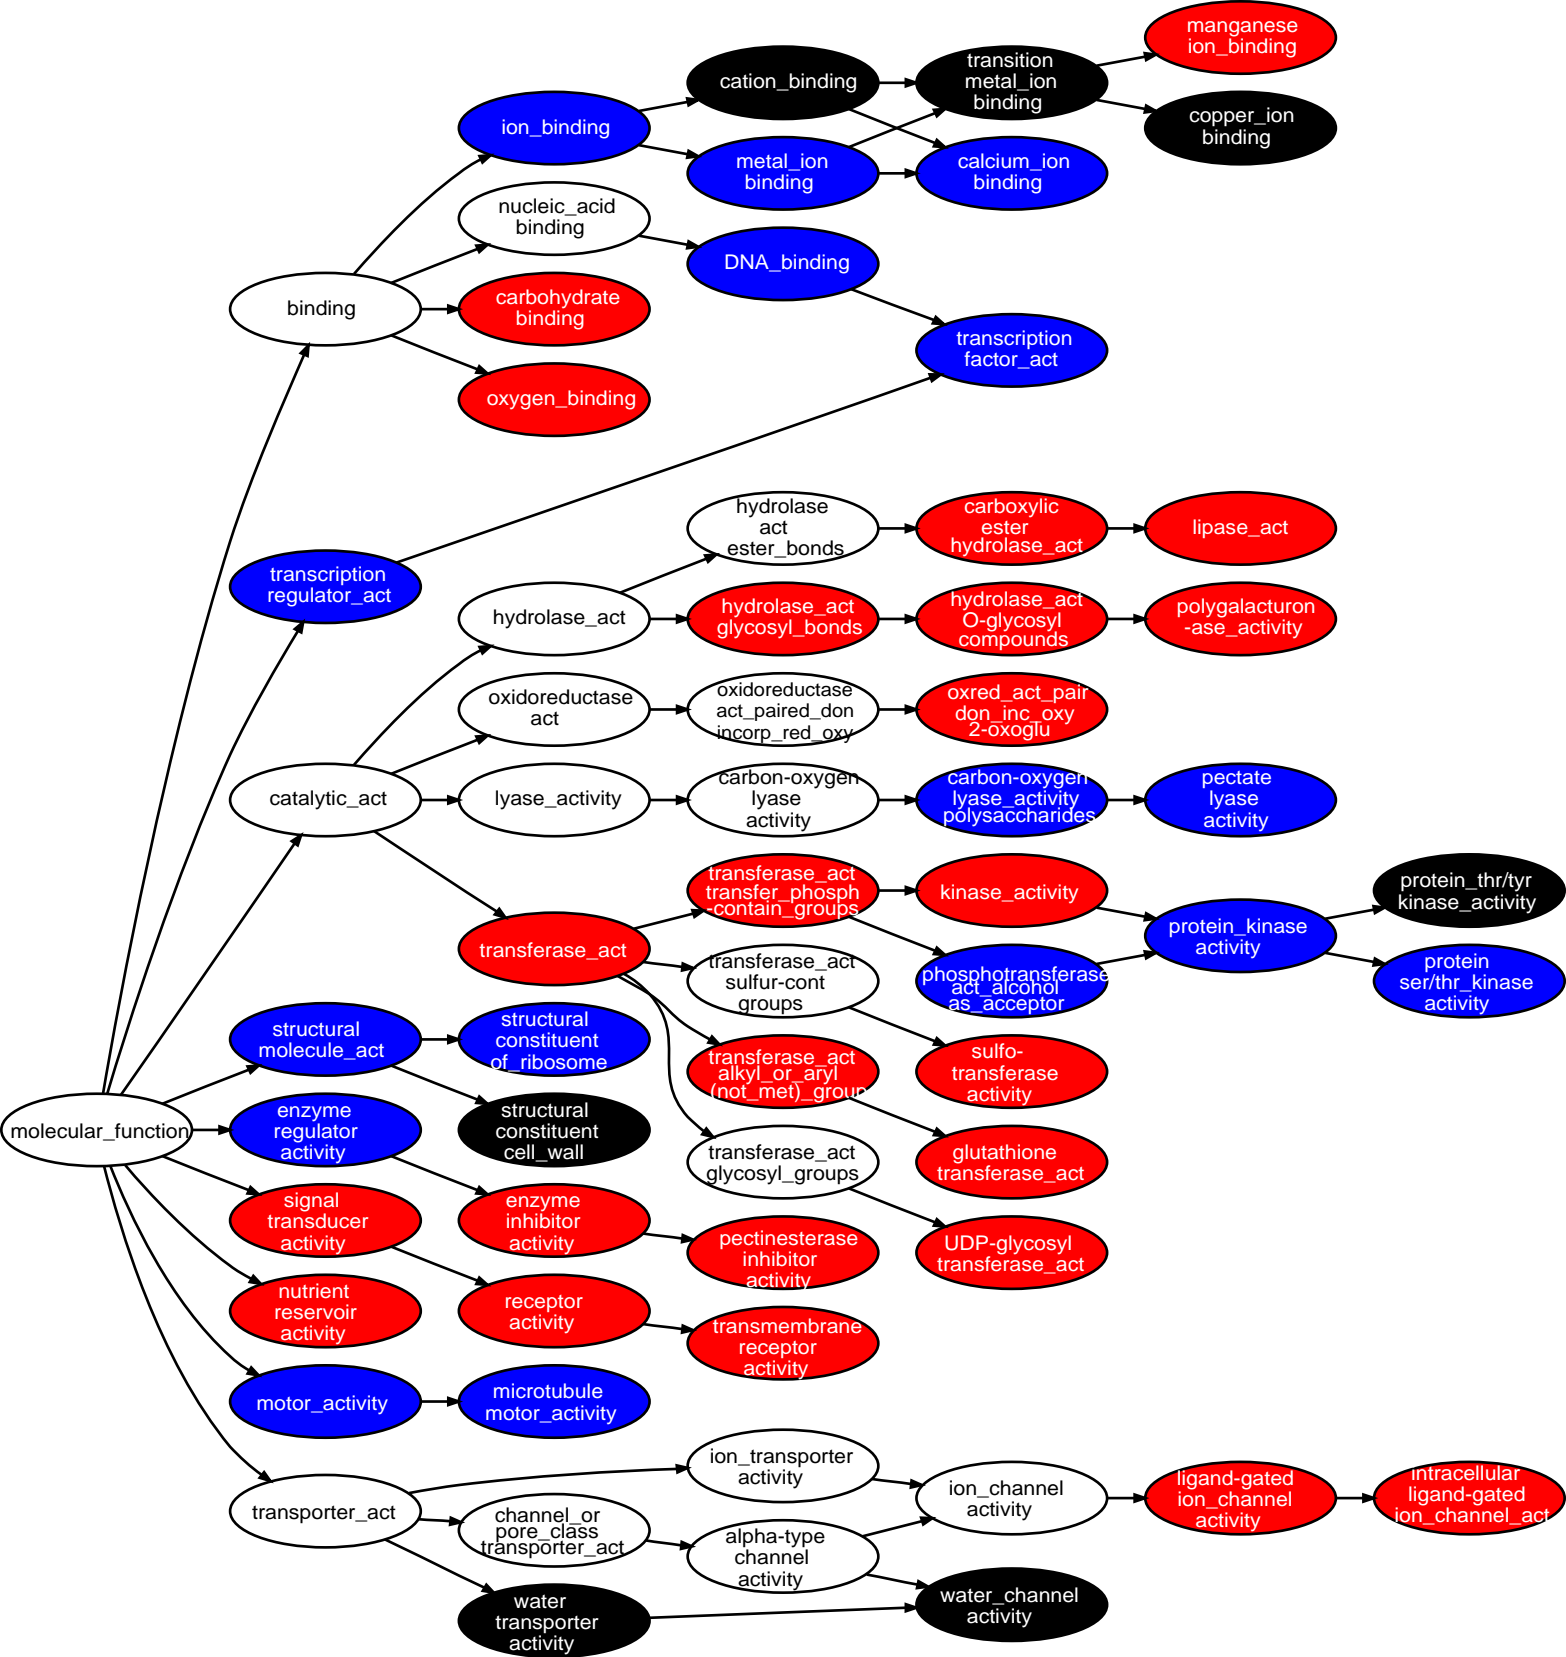

- Overrepresented in expanded OGs and overrepresented in tandem duplicates
- Overrepresented in expanded OGs and overrepresented in non-tandemly duplicates
- Overrepresented in expanded OGs but not overrepresented in either type of duplicates

Overrepresented functional categories in molecular function

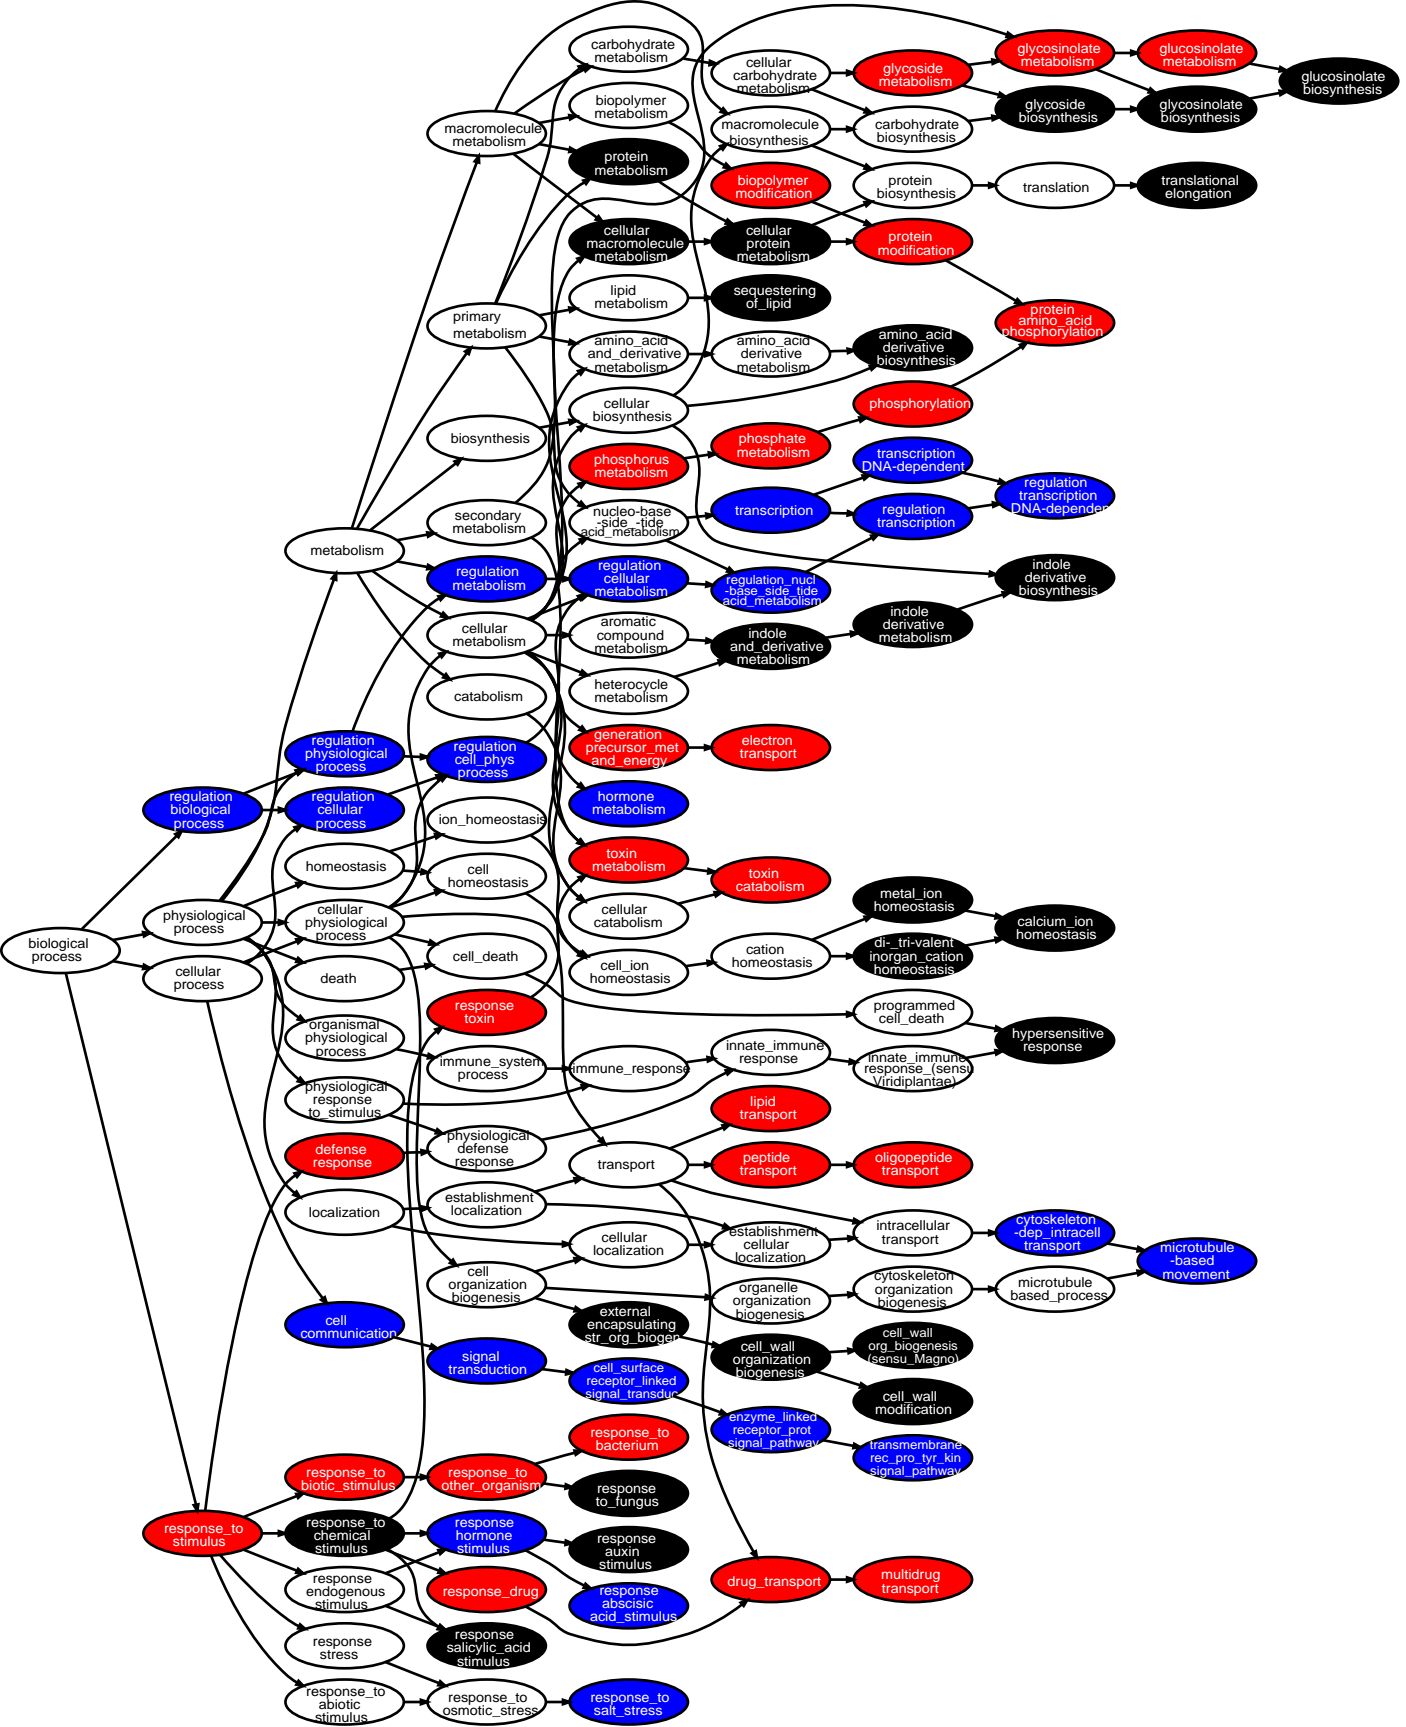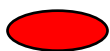

Overrepresented in expanded OGs and overrepresented in tandem duplicates

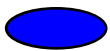

Overrepresented in expanded OGs and overrepresented in non-tandemly duplicates

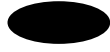

Overrepresented in expanded OGs but not overrepresented in either type of duplicates

Overrepresented function categories in biological process
