# Supplementary material
Source: PubMed Central journal article supplement (PMC2556807)

## Supplemental Figure 4

### Biological process categories over-represented in tandem or non-tandem duplications in OGs showing single lineage expansion

The GO category descriptions are shown on the right. There are six rows. Each row represents a type/set of OGs as follows. From left to right rows, similarity-based A-M OGs, tree-based A-M OGs, similarity-based A-R OGs, tree-based A-R OGs, similarity-based A-P OGs and tree-based A-P OGs. Here, functional categories over-represented in more than 4 sets of OGs are shown.

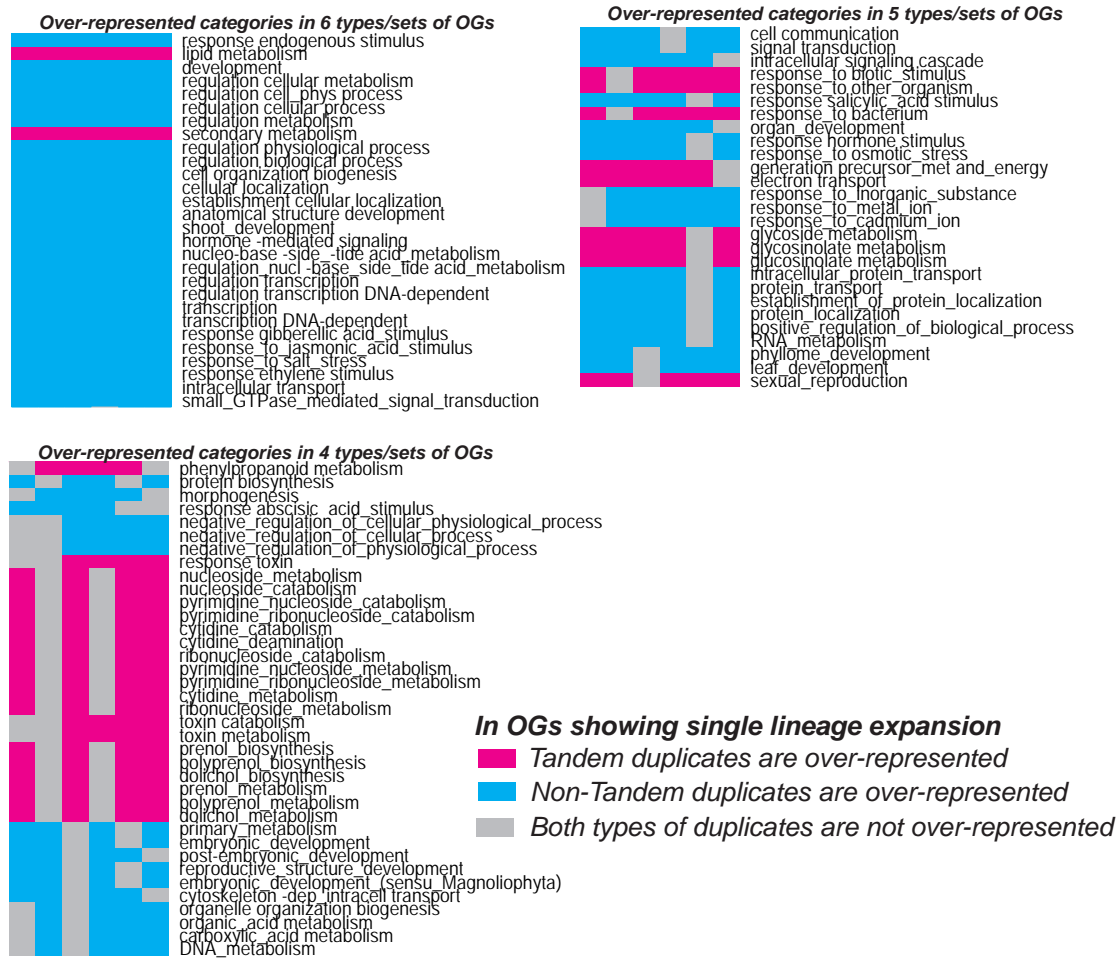

Supplement: pp.108.122457_11.pdf [file pp.108.122457_11.pdf]
