# Supplementary material
Source: PubMed Central journal article supplement (PMC2556807)
Supplement: pp.108.122457_12.pdf [file pp.108.122457_12.pdf]

## Supplemental Figure 2

GeneOntology (GO) functional categories with over-represented numbers of genes in expanded via tandem or non-tandem mechanisms in the *A. thaliana* lineage of three types of OGs (A-M, A-R, and A-P)

Cellular components

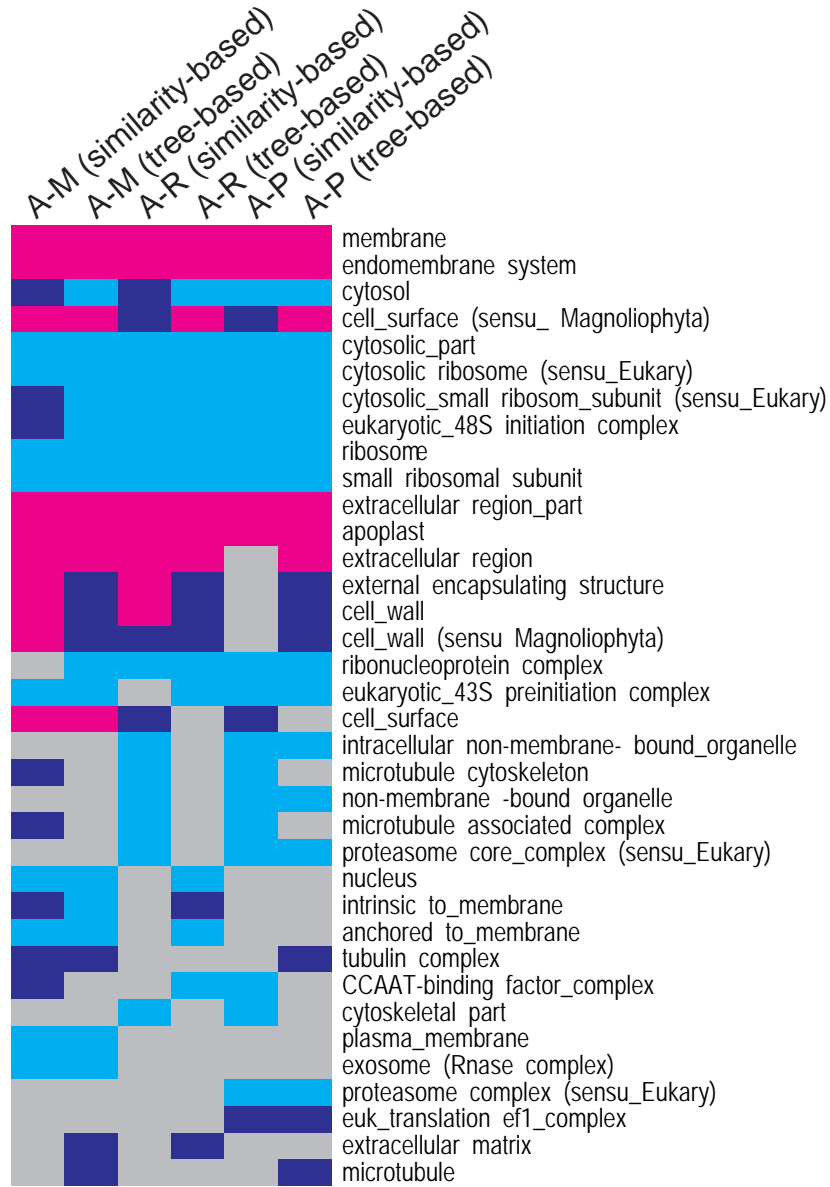

- Overrepresented in expanded ortholog groups and overrepresented in tandem duplicates
- Overrepresented in expanded ortholog groups and overrepresented in non-tandem duplicates
- Overrepresented in expanded ortholog groups but not overrepresented in either type of duplication
- Not overrepresented in expanded ortholog groups

# Molecular function

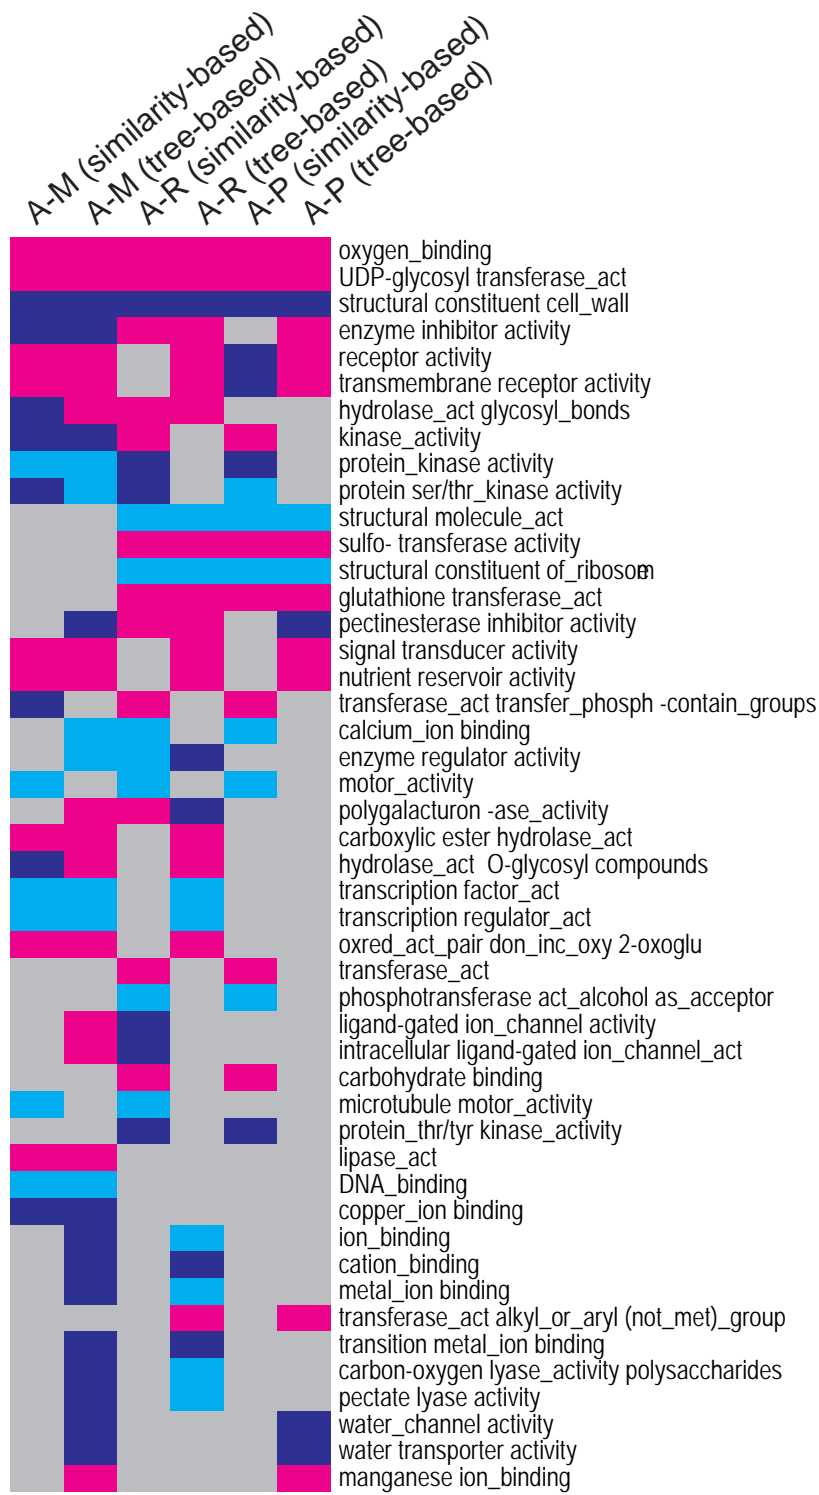

- Overrepresented in expanded ortholog groups and overrepresented in tandem duplicates
- Overrepresented in expanded ortholog groups and overrepresented in non-tandem duplicates
- Overrepresented in expanded ortholog groups but not overrepresented in either type of duplication
- Not overrepresented in expanded ortholog groups

Biological process

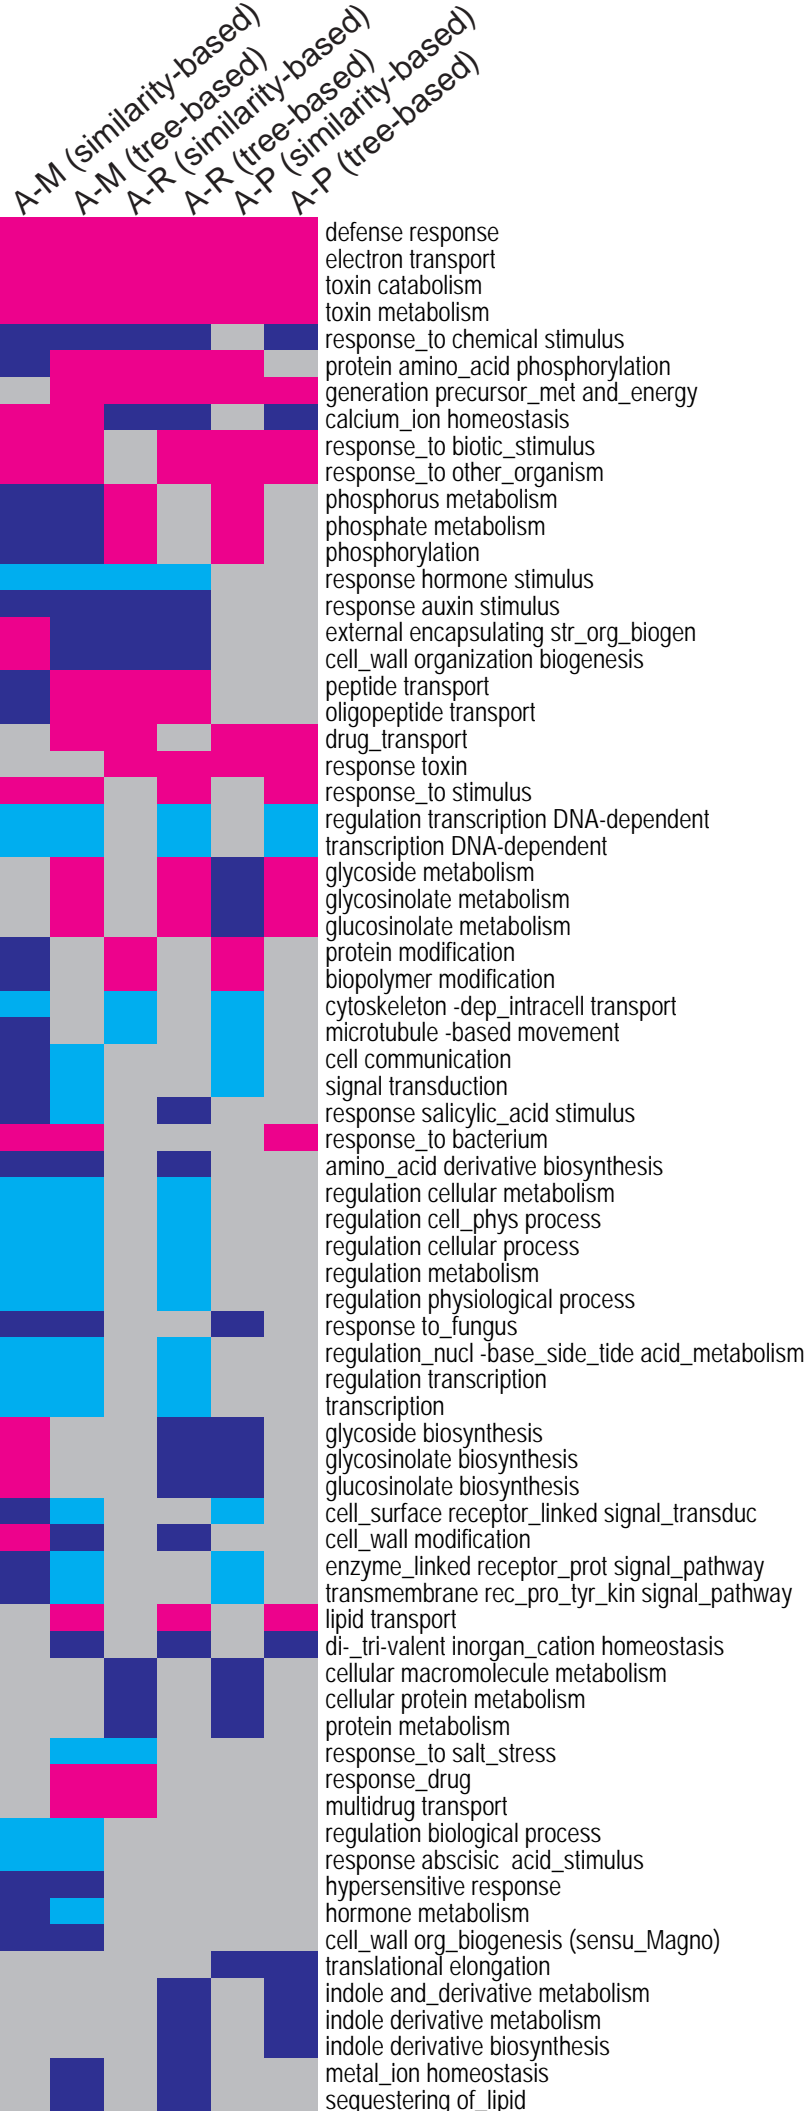

- Overrepresented in expanded ortholog groups and overrepresented in tandem duplicates
- Overrepresented in expanded ortholog groups and overrepresented in non-tandem duplicates
- Overrepresented in expanded ortholog groups but not overrepresented in either type of duplication
- Not overrepresented in expanded ortholog groups
